# Supplementary material for: Characterization of missing values in untargeted MS-based metabolomics data and evaluation of missing data handling strategies
Source: PubMed Central journal article supplement (PMC6153696; doi:10.1007/s11306-018-1420-2), 2018-09-20

# Characterization of missingness in untargeted MS-based metabolomics data sets and evaluation of missing data handling strategies

*Kieu Trinh Do<sup>¶</sup>, Simone Wahl<sup>¶</sup>, Johannes Raffler, Sophie Molnos, Michael Laimighofer, Jerzy Adamski, Karsten Suhre, Konstantin Strauch, Annette Peters, Christian Gieger, Claudia Langenberg, Isobel D. Stewart, Fabian J. Theis, Harald Grallert, Gabi Kastenmüller<sup>#</sup>, Jan Krumsiek<sup>#</sup>*

## Supporting Information File S1: LOD tendency

As an explorative method to visualize the missingness mechanism of a metabolite  $m$ , a second (auxiliary) metabolite  $m_{aux}$  showing the strongest Pearson correlation to  $m$  was determined. Comparing the distribution of concentrations of metabolite  $m_{aux}$  for observations with and without observed  $m$  can provide information about whether or not missingness in  $m$  is systematic.

In the following, for all metabolites (x-axis) with more than 10% and less than 70% missing values a scatterplot with its auxiliary metabolite (y-axis) is shown. Blue dots correspond to observed concentrations in both metabolites. Red dots represent concentrations of the auxiliary metabolite in samples with missing values of the investigated metabolite. **corr** and **p** are Pearson correlation coefficient and corresponding p-value.

The boxplots compare the concentrations of the auxiliary metabolite between samples with missing and samples with measured values of the given metabolite. **p<sub>Wst</sub>** is the p-value of a performed Wilcoxon-Mann-Whitney test. An LOD tendency is assumed is **p<sub>Wst</sub>** is below  $\alpha = 0.05$  after Bonferroni correction for multiple testing.

Missing values of 1–arachidonoylglycerophosphocholine  
in 1–docosahexaenoylglycerophosphocholine

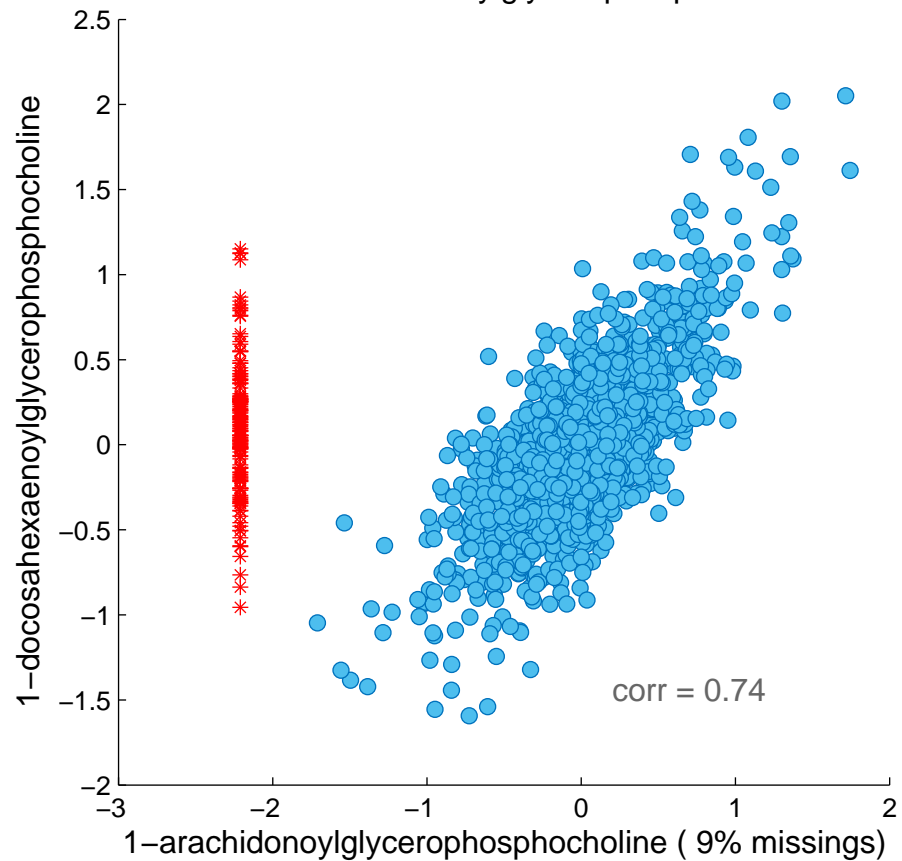

Concentrations of 1–docosahexaenoylglycerophosphocholine in  
missing and observed 1–arachidonoylglycerophosphocholine

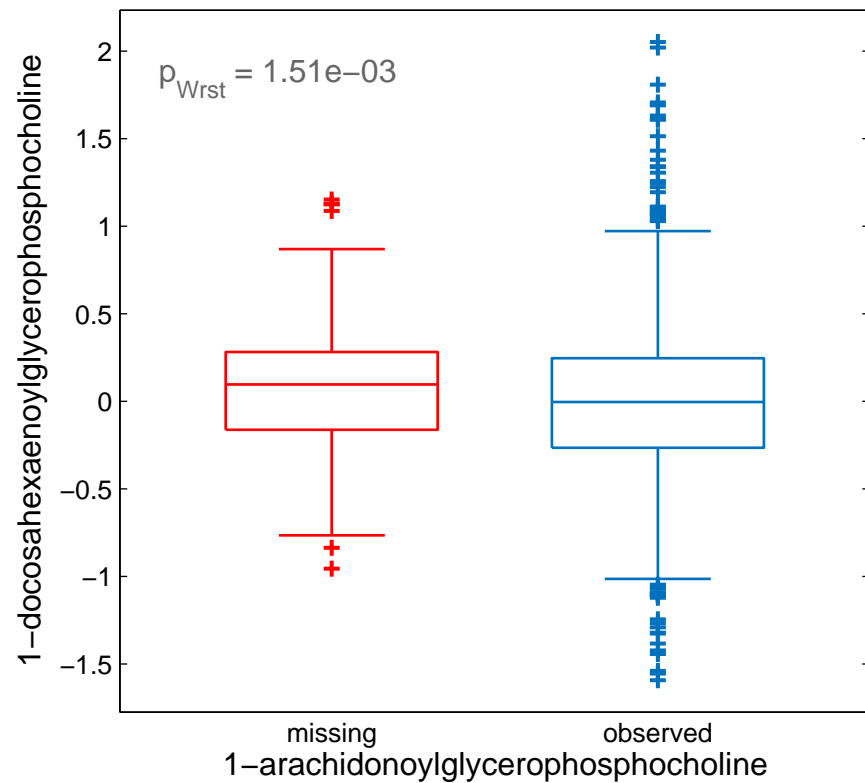

Missing values of cholate  
in deoxycholate

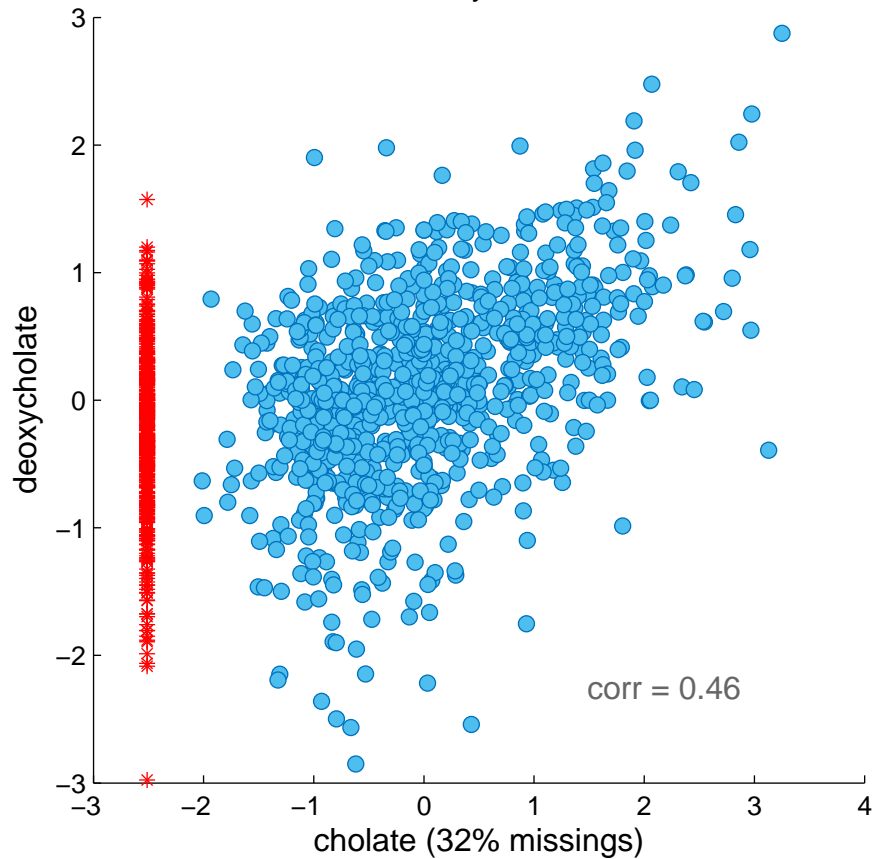

Concentrations of deoxycholate in  
missing and observed cholate

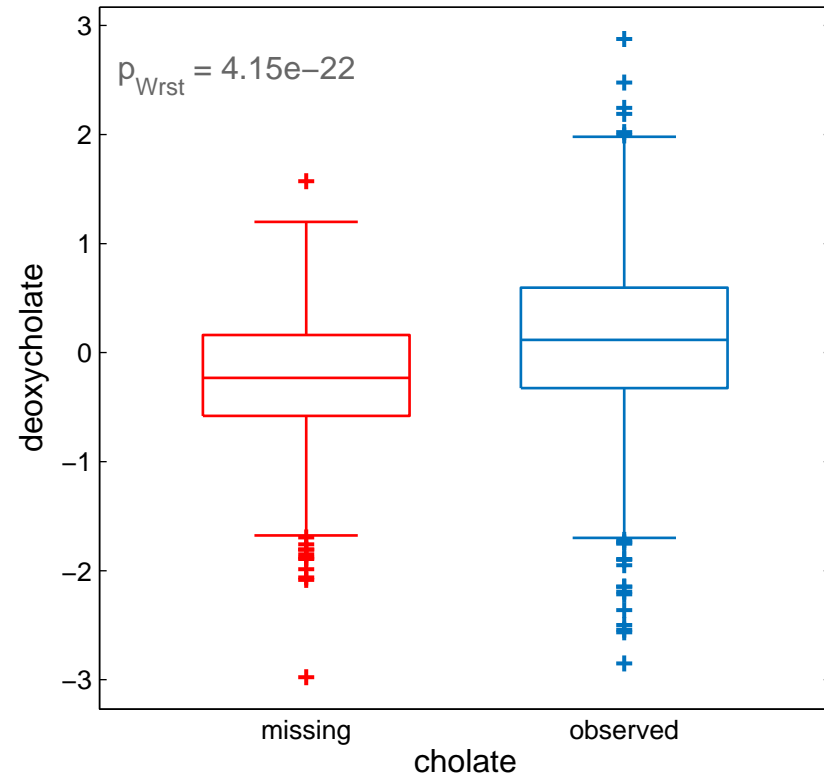

Missing values of citrulline  
in X-06267

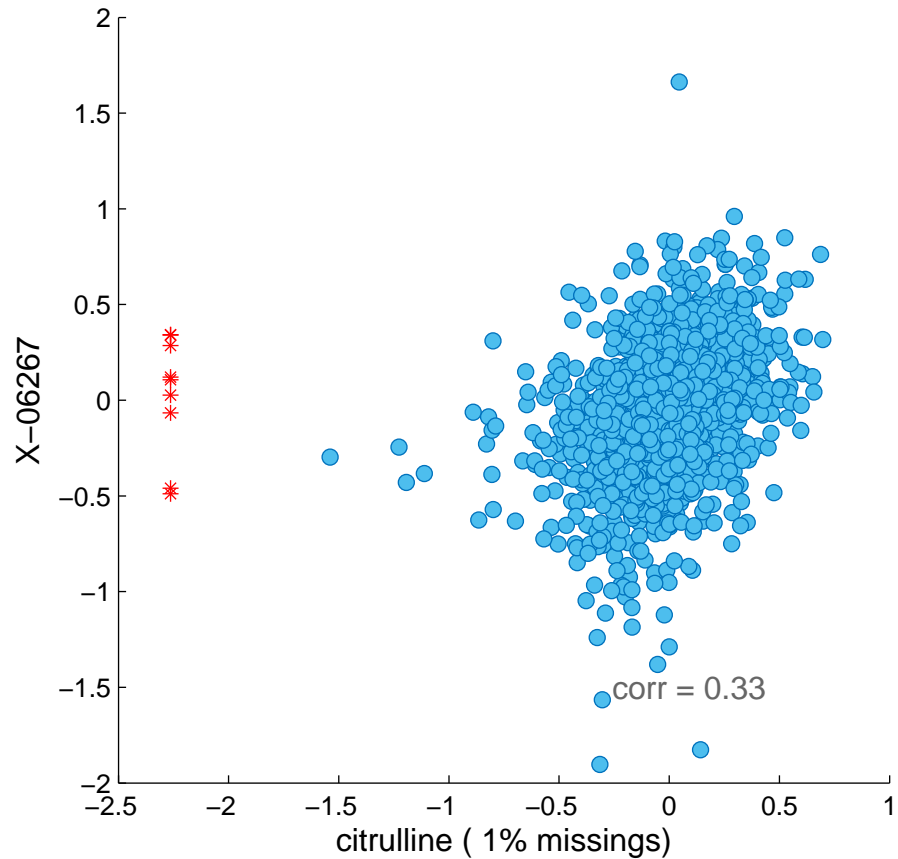

Concentrations of X-06267 in  
missing and observed citrulline

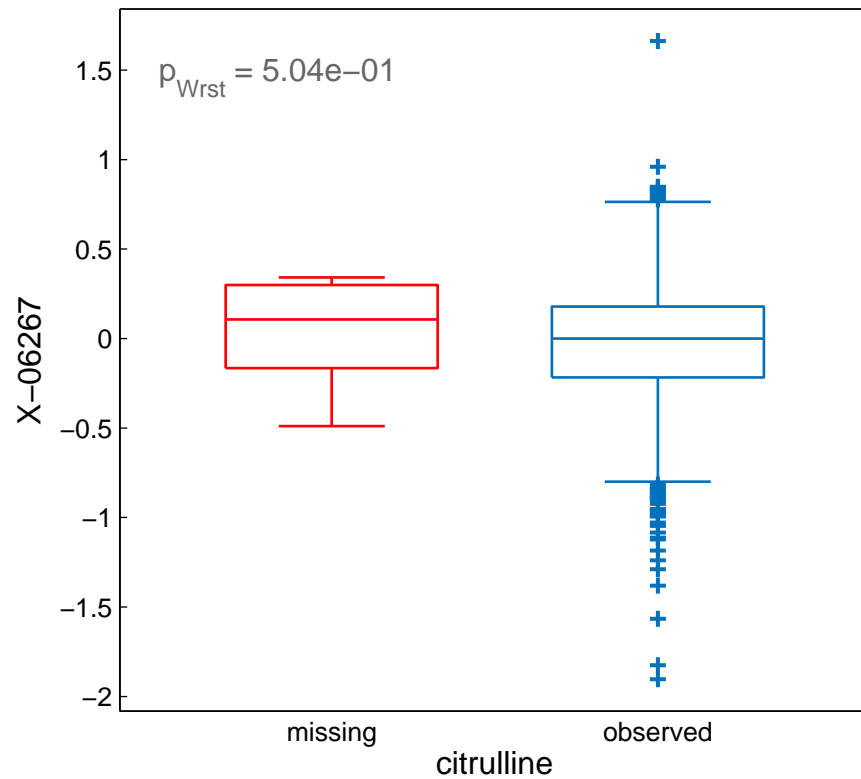



Missing values of 1-methylurate  
in 1-methylxanthine

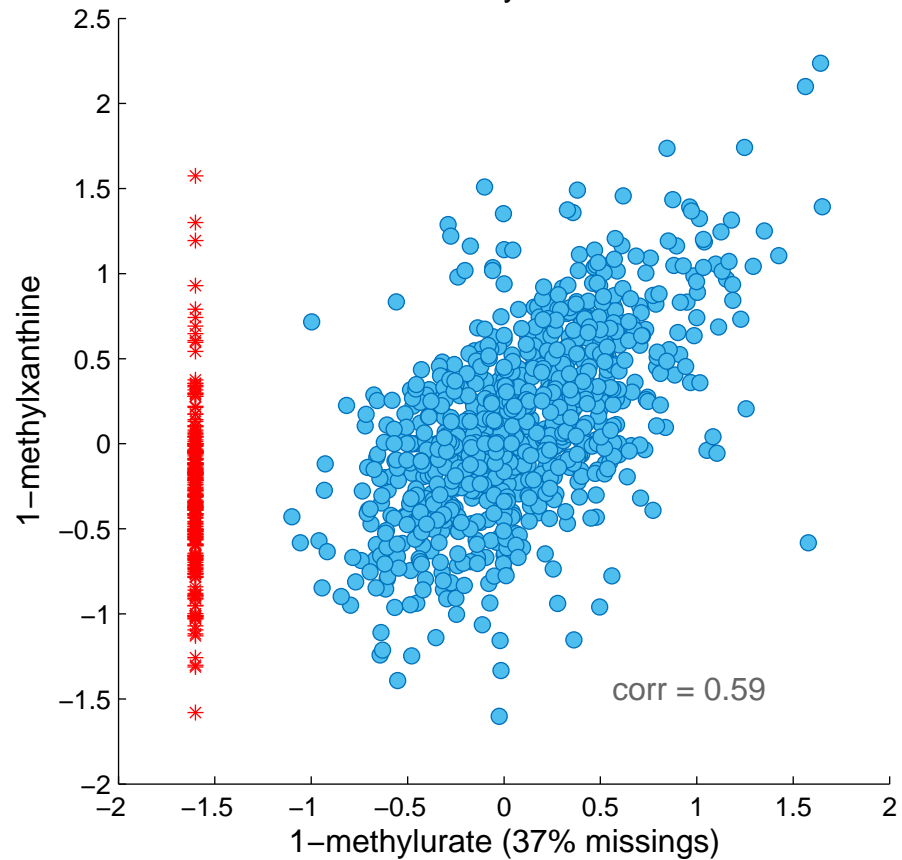

Concentrations of 1-methylxanthine in  
missing and observed 1-methylurate

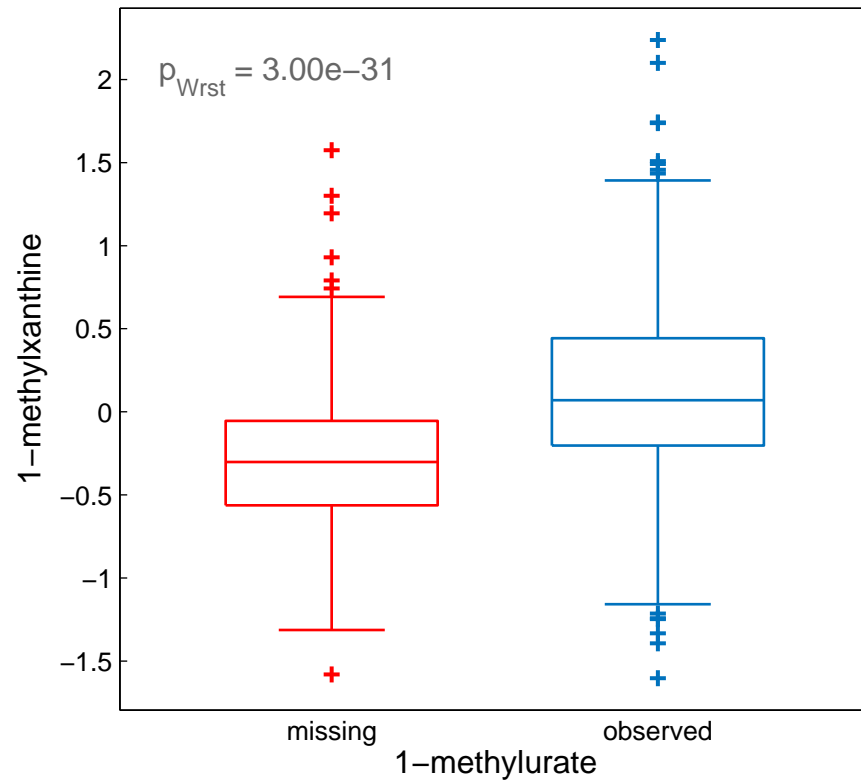

Missing values of cortisol  
in cortisone

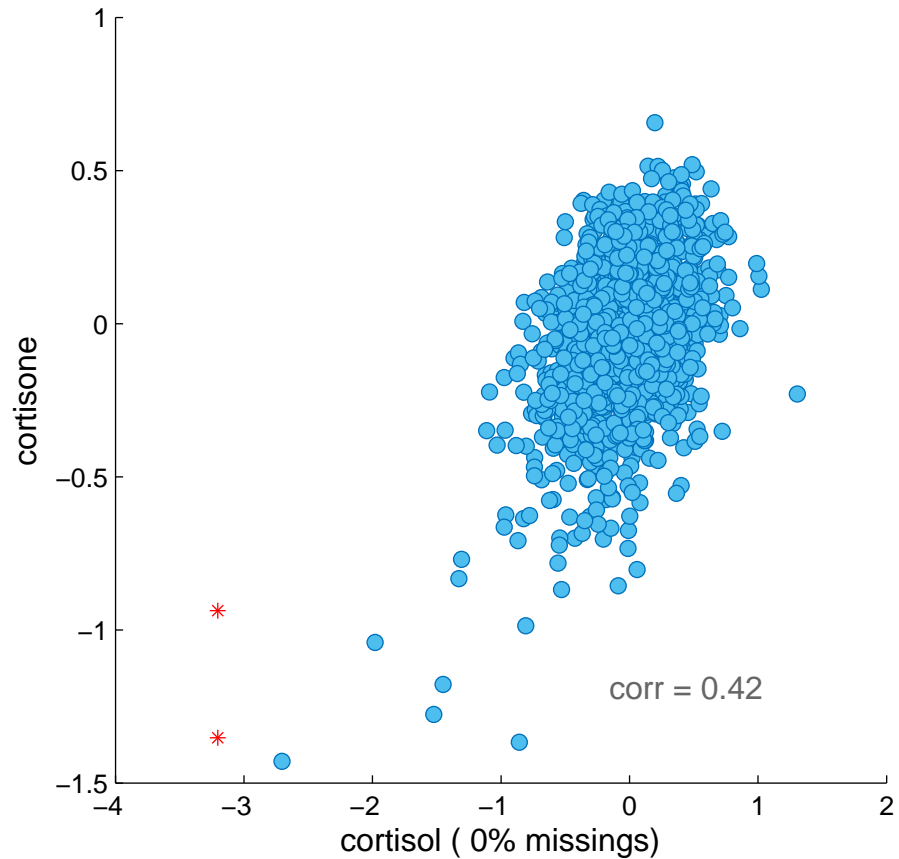

Concentrations of cortisone in  
missing and observed cortisol

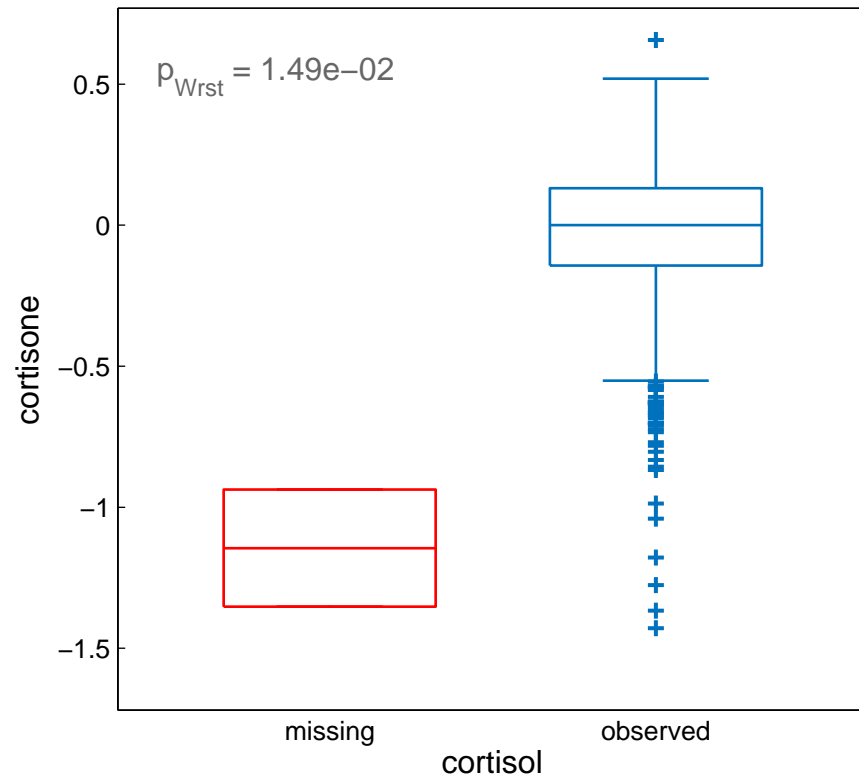

Missing values of cortisone  
in cortisol

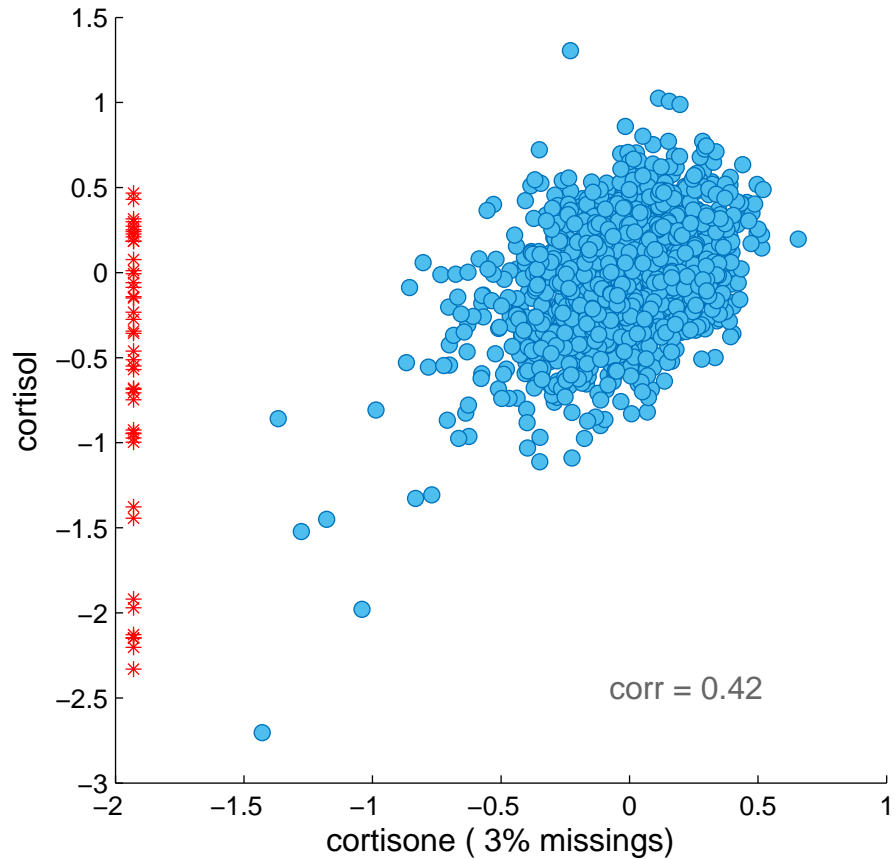

Concentrations of cortisol in  
missing and observed cortisone

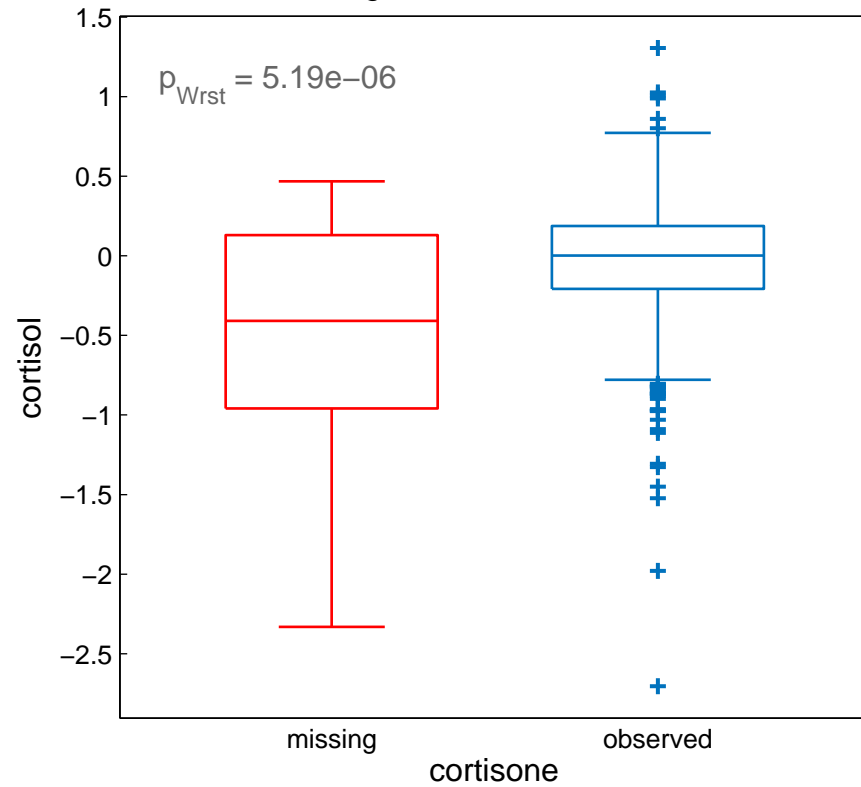

Missing values of cotinine  
in 4-vinylphenol sulfate

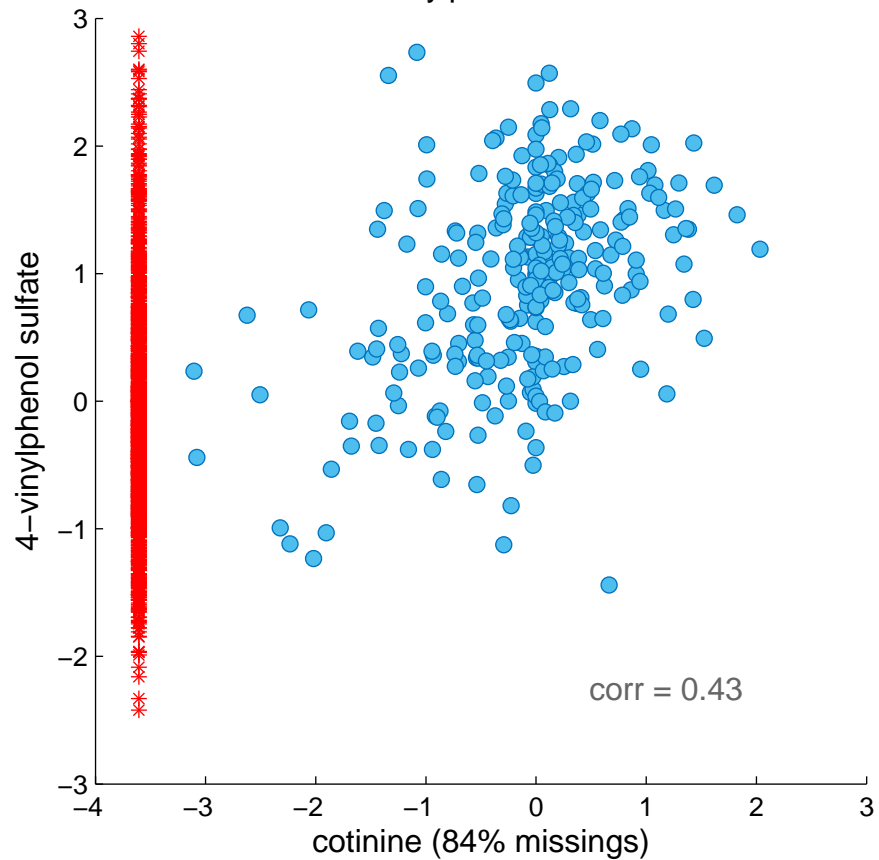

Concentrations of 4-vinylphenol sulfate in  
missing and observed cotinine

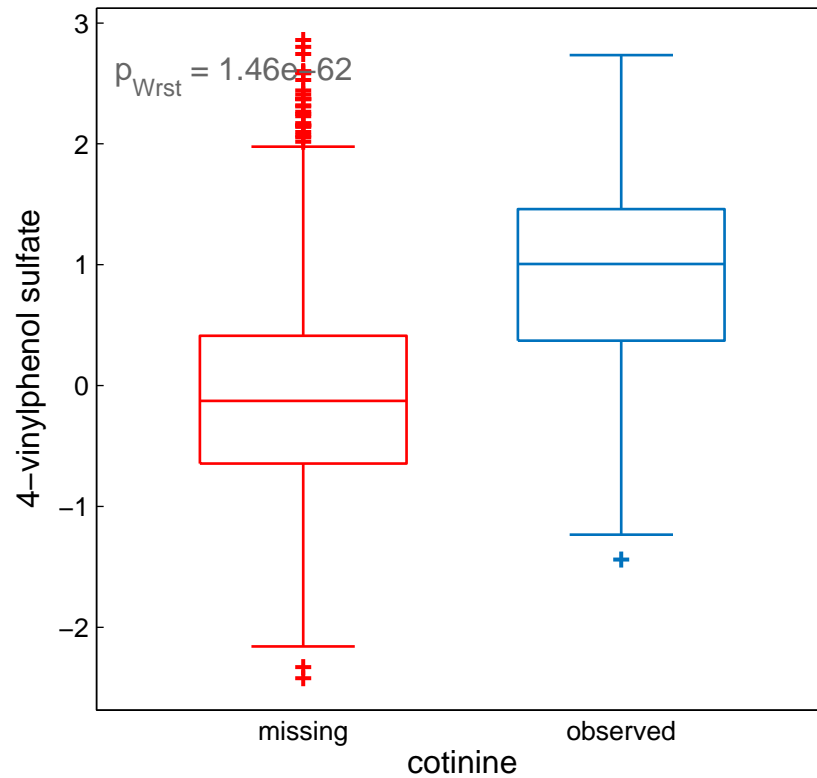

Missing values of cysteine  
in cystine

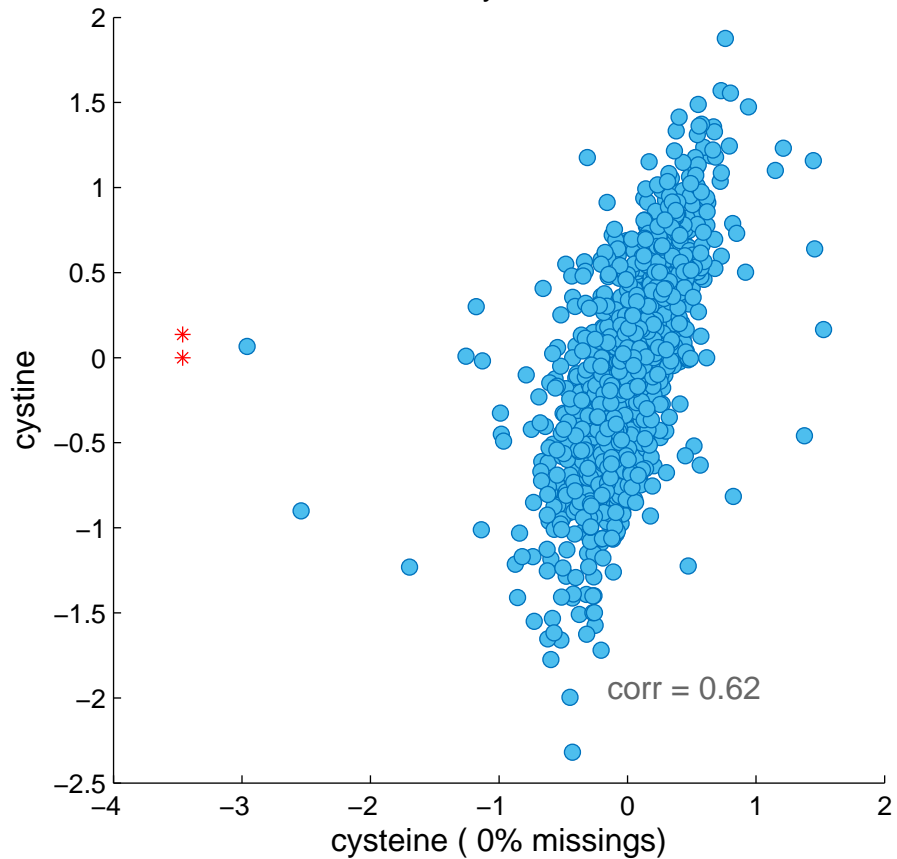

Concentrations of cystine in  
missing and observed cysteine

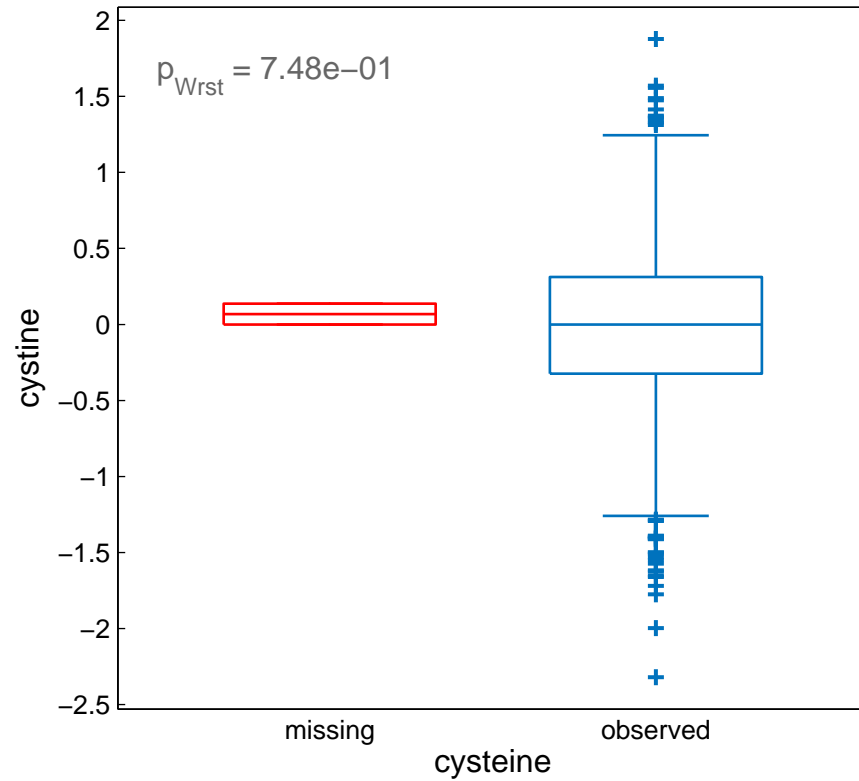

Missing values of cysteine–glutathione disulfide in glutamate

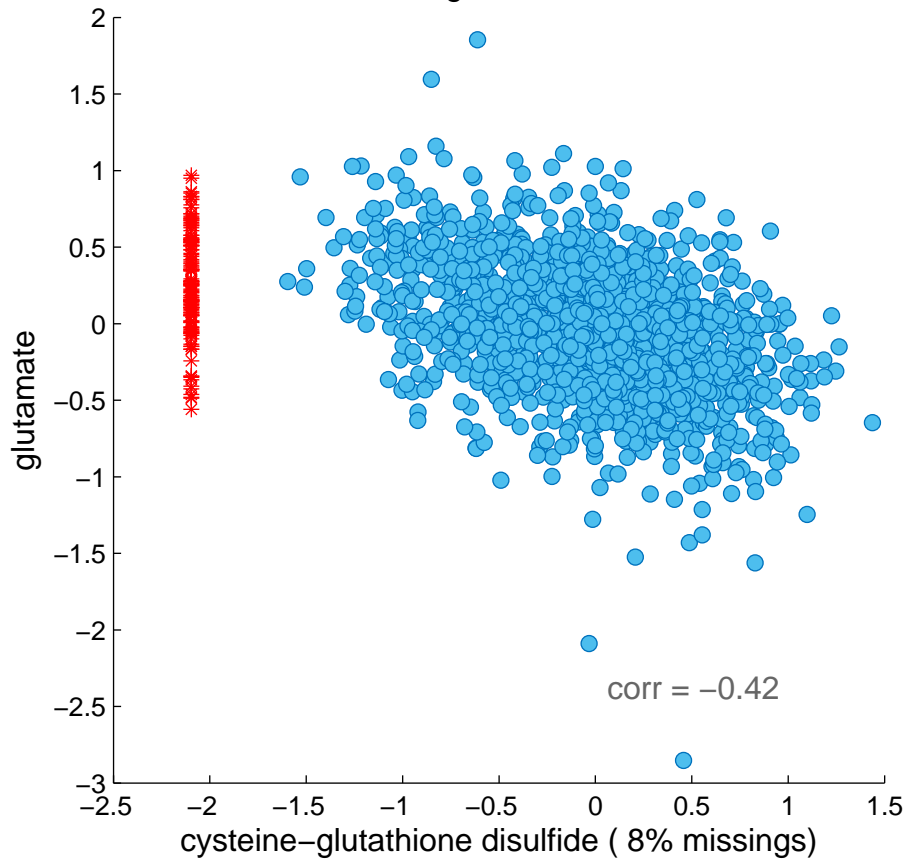

Concentrations of glutamate in missing and observed cysteine–glutathione disulfide

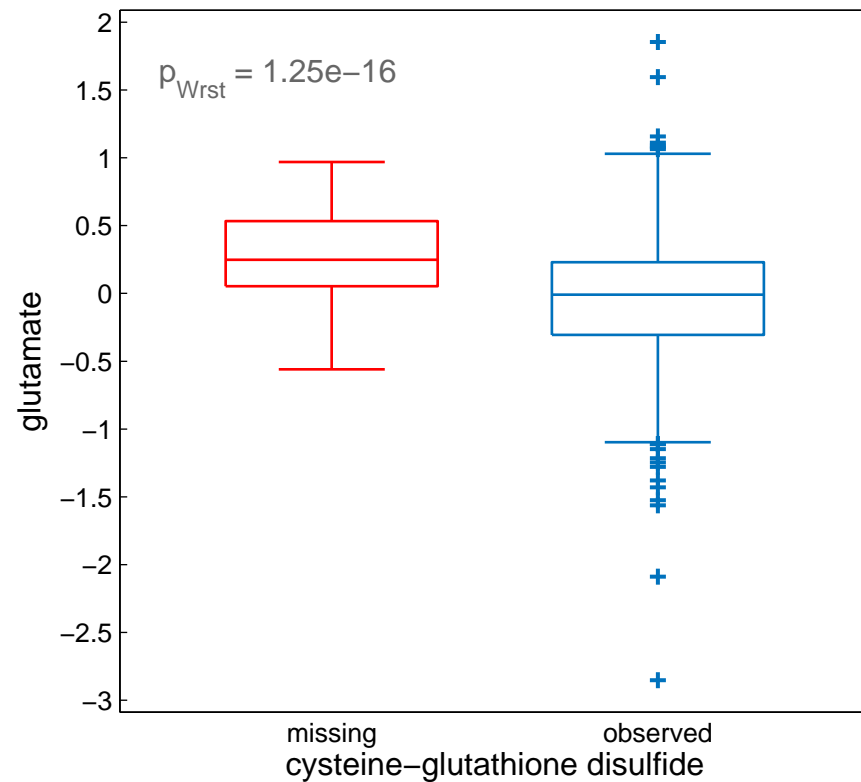

Missing values of cystine  
in cystine

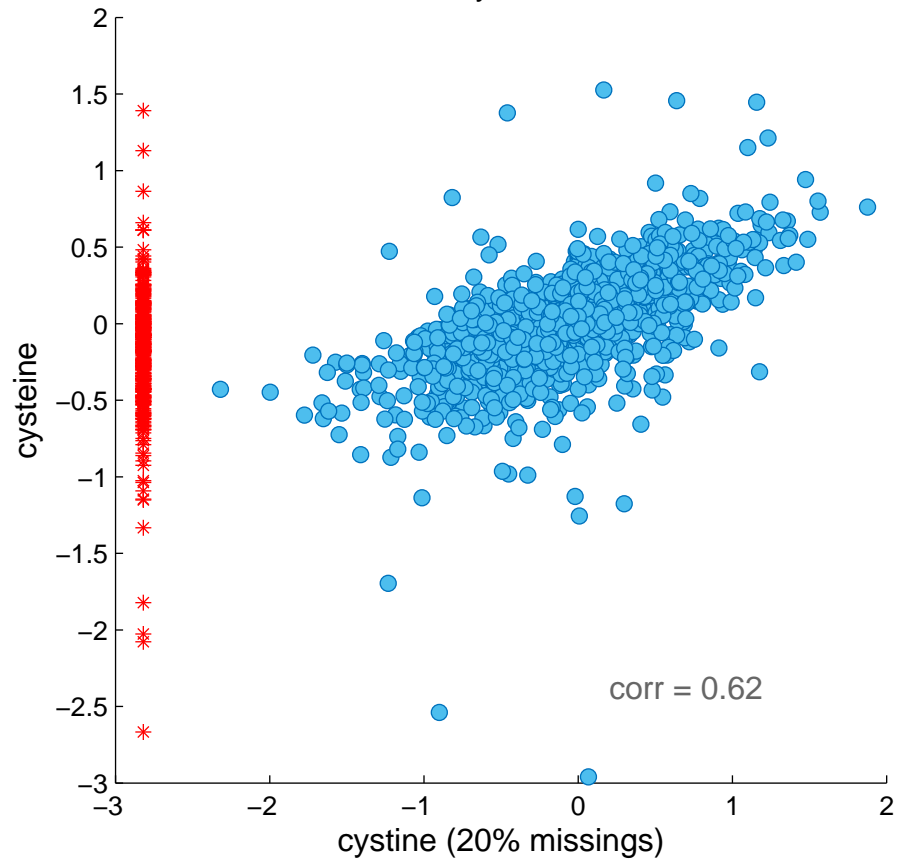

Concentrations of cystine in  
missing and observed cystine

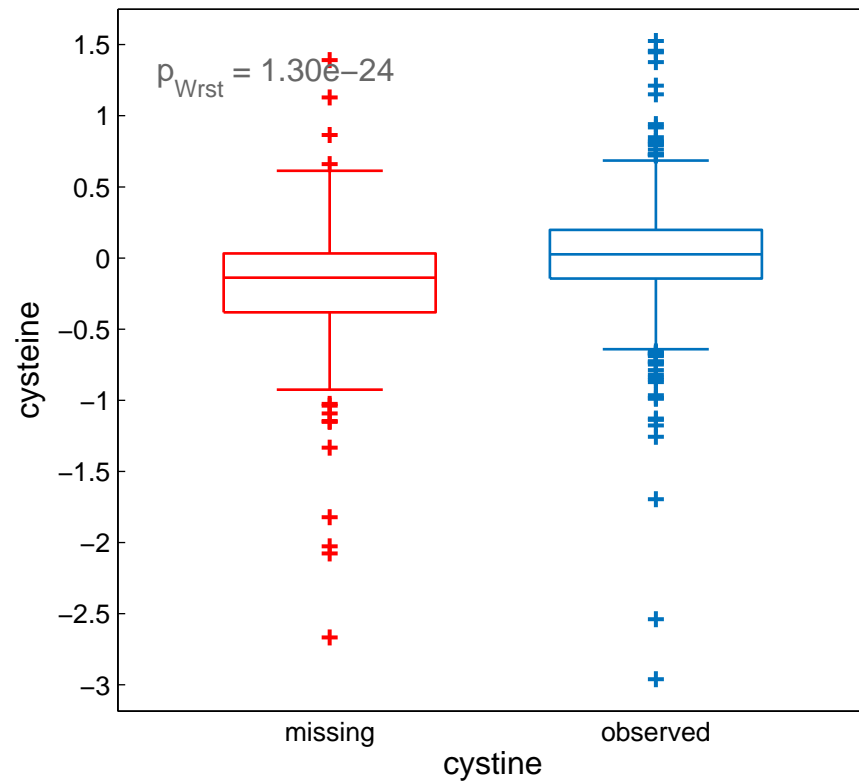

Missing values of 1-methylxanthine  
in paraxanthine

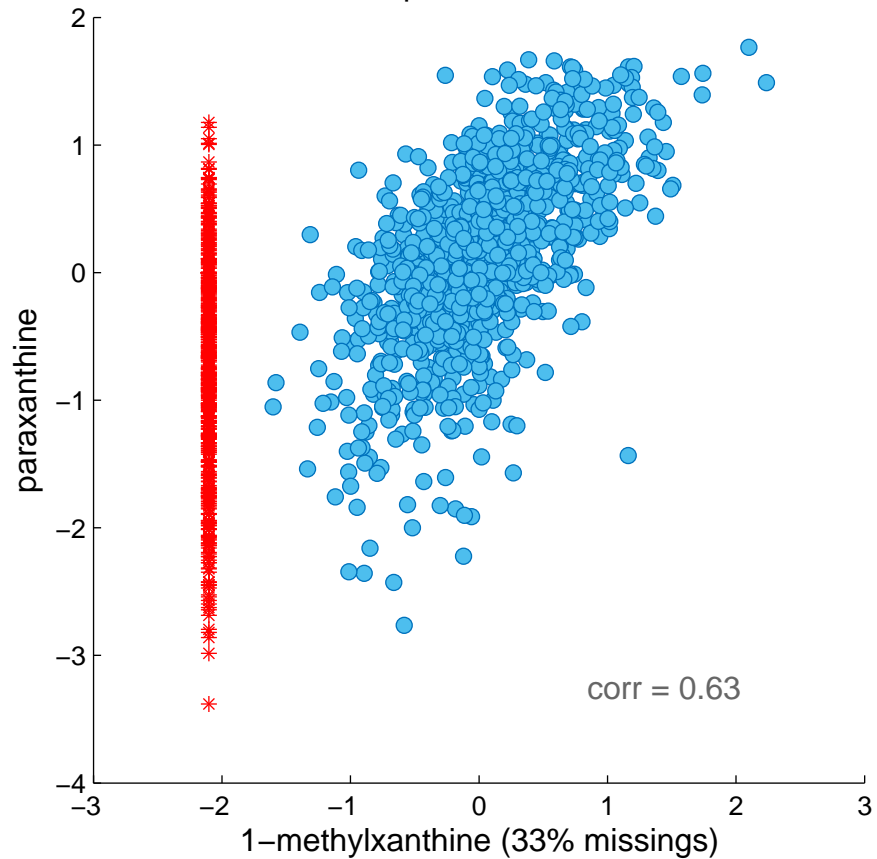

Concentrations of paraxanthine in  
missing and observed 1-methylxanthine

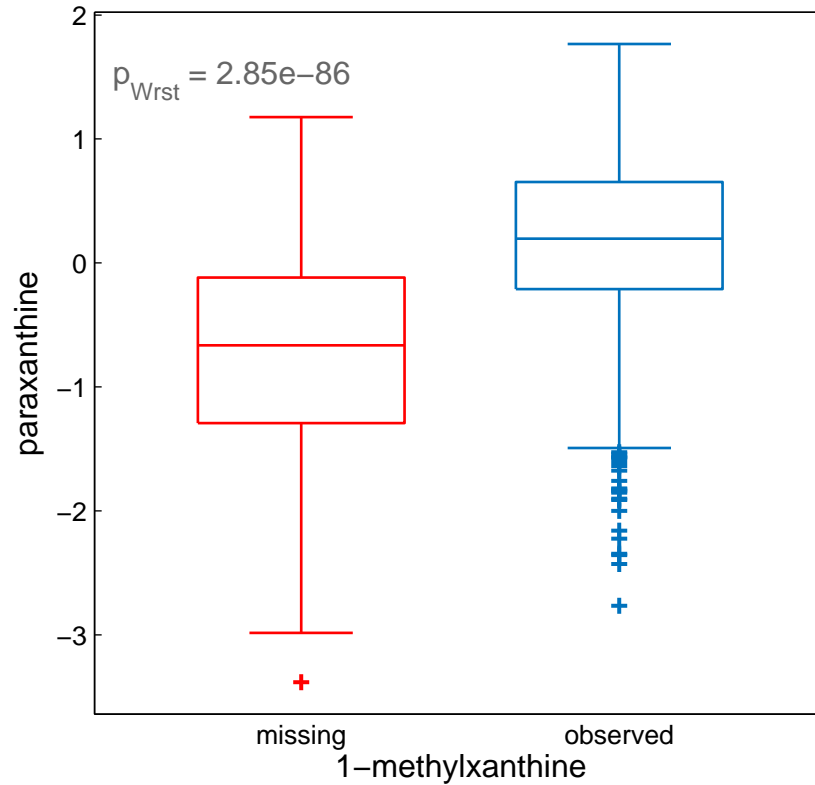



Missing values of deoxycholate  
in ursodeoxycholate

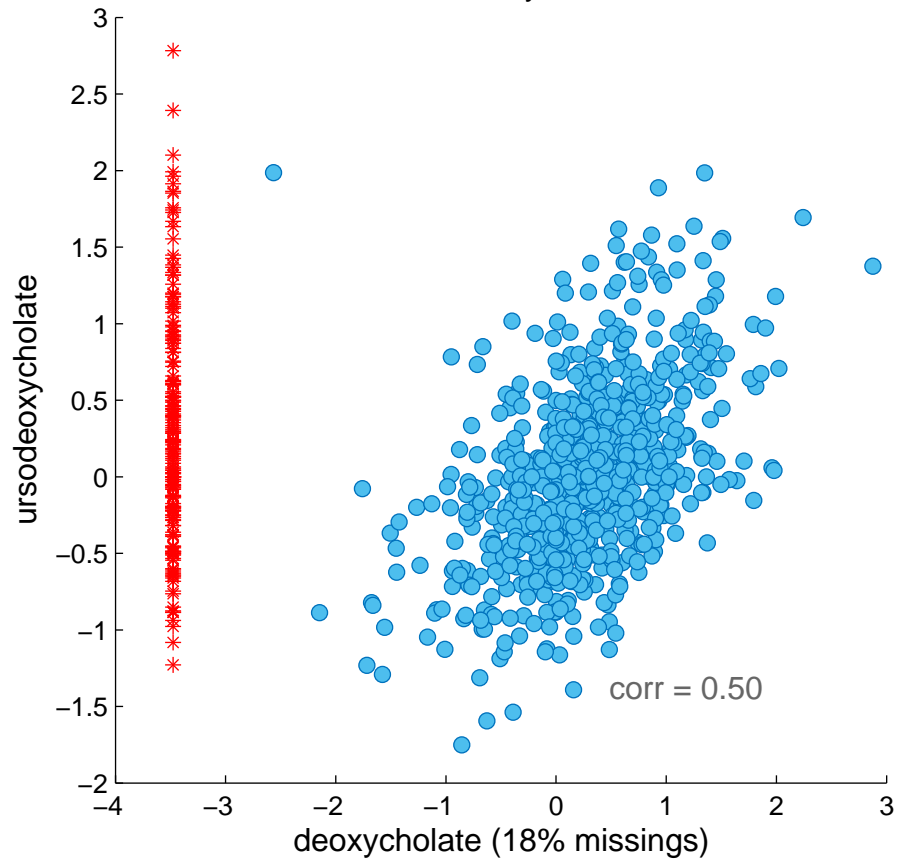

Concentrations of ursodeoxycholate in  
missing and observed deoxycholate

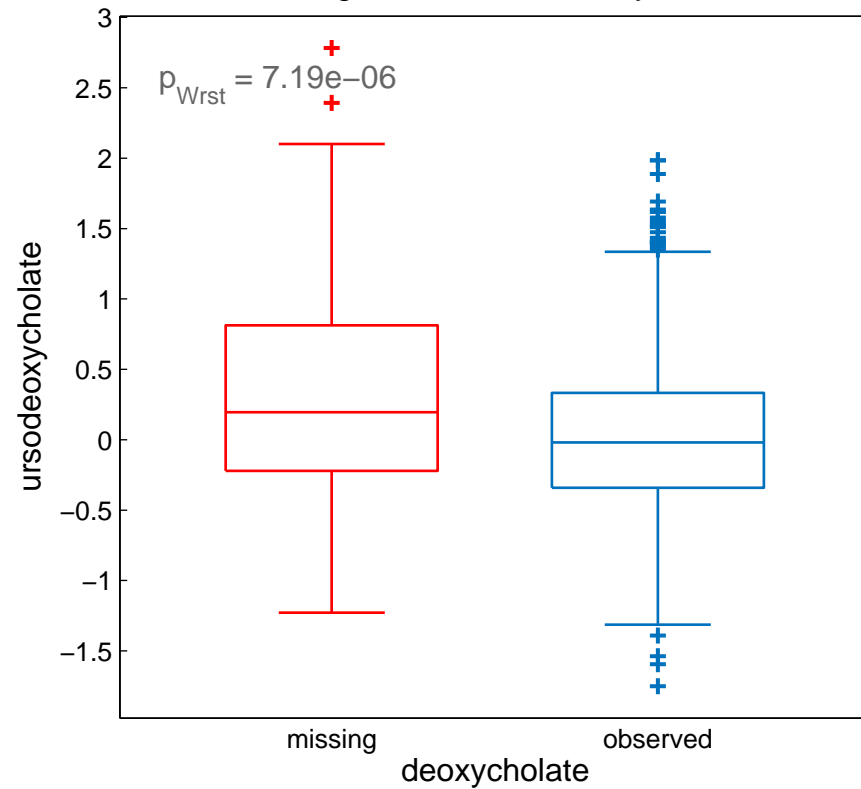

Missing values of dodecanedioate  
in tetradecanedioate

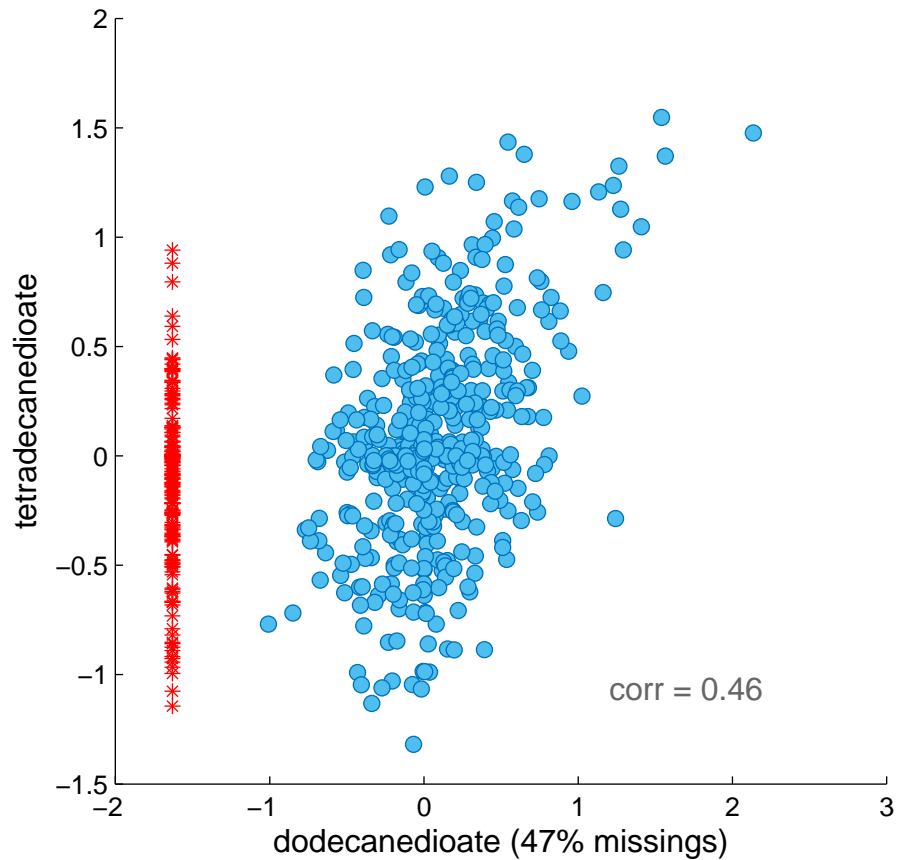

Concentrations of tetradecanedioate in  
missing and observed dodecanedioate

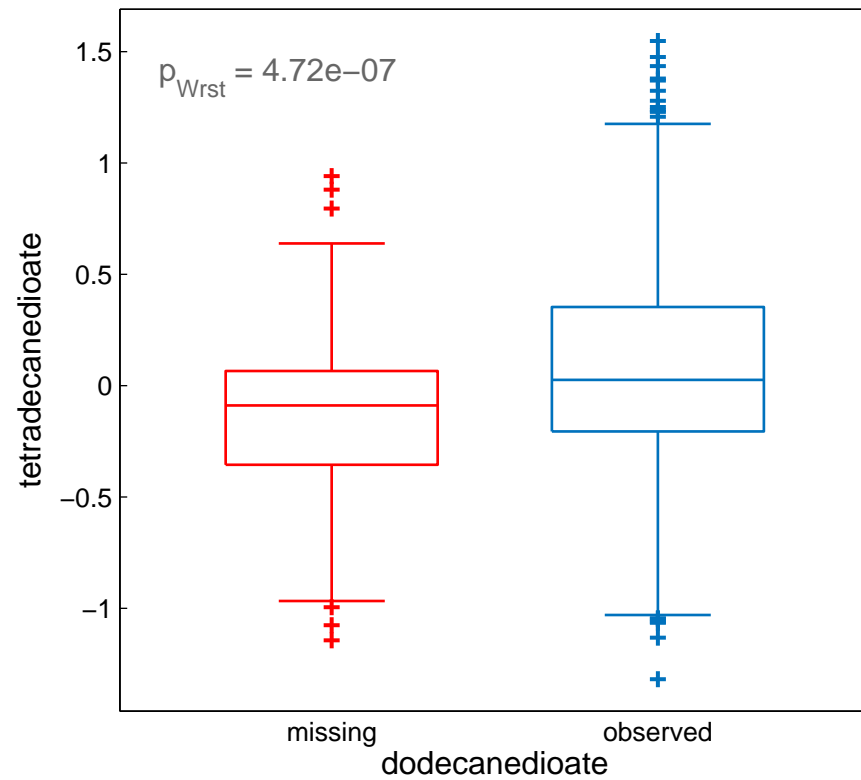

Missing values of erythritol  
in erythrone

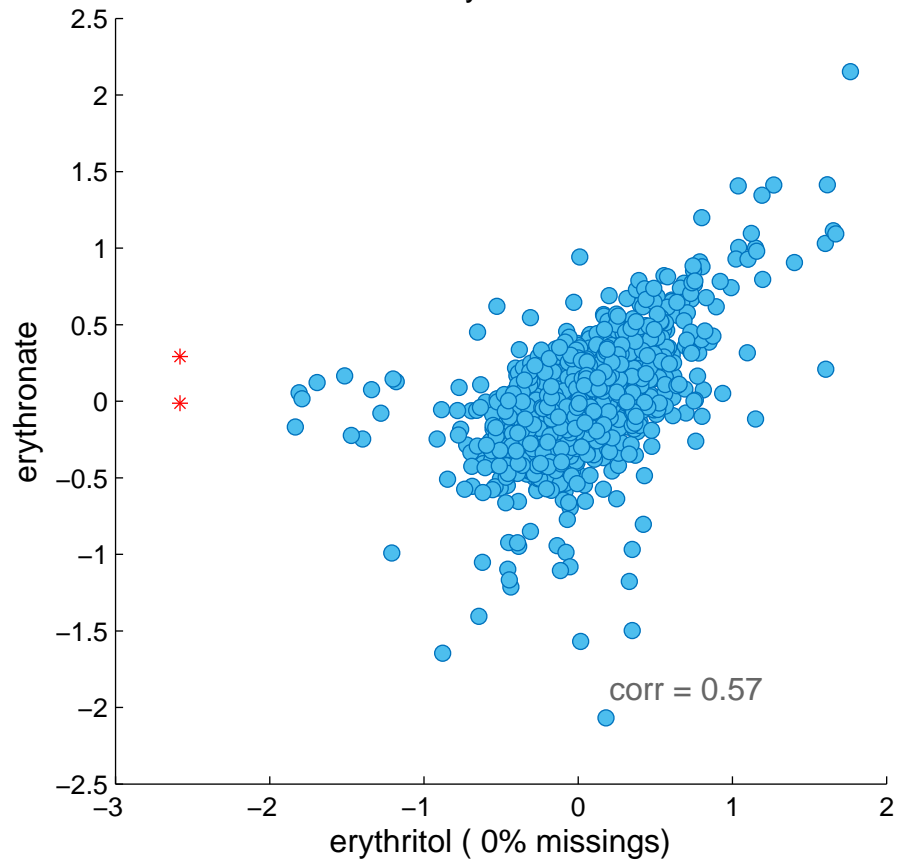

Concentrations of erythrone in  
missing and observed erythritol

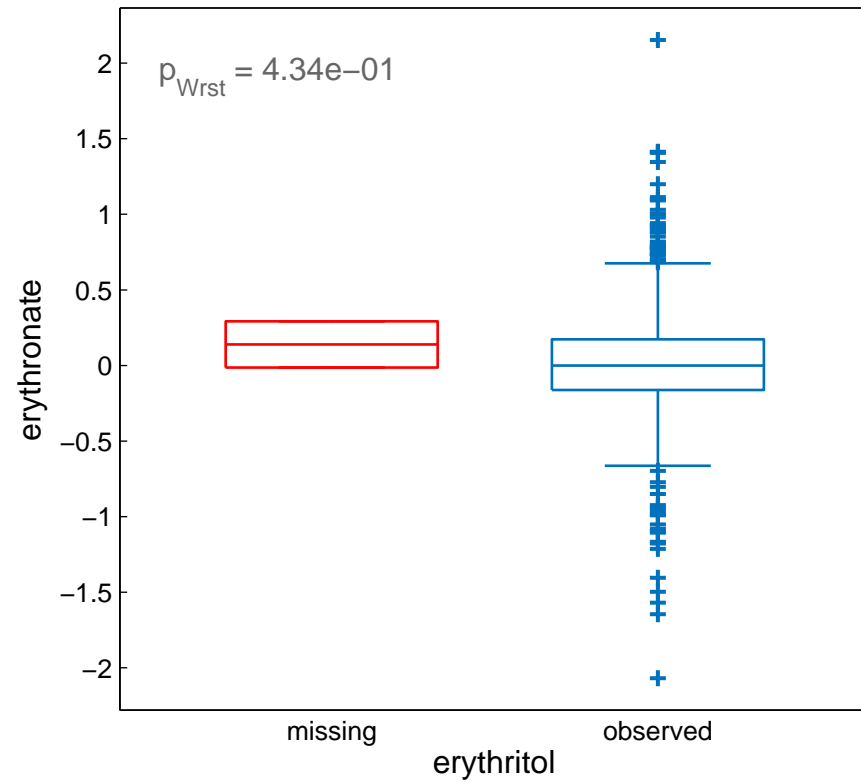

Missing values of erythronate in erythritol

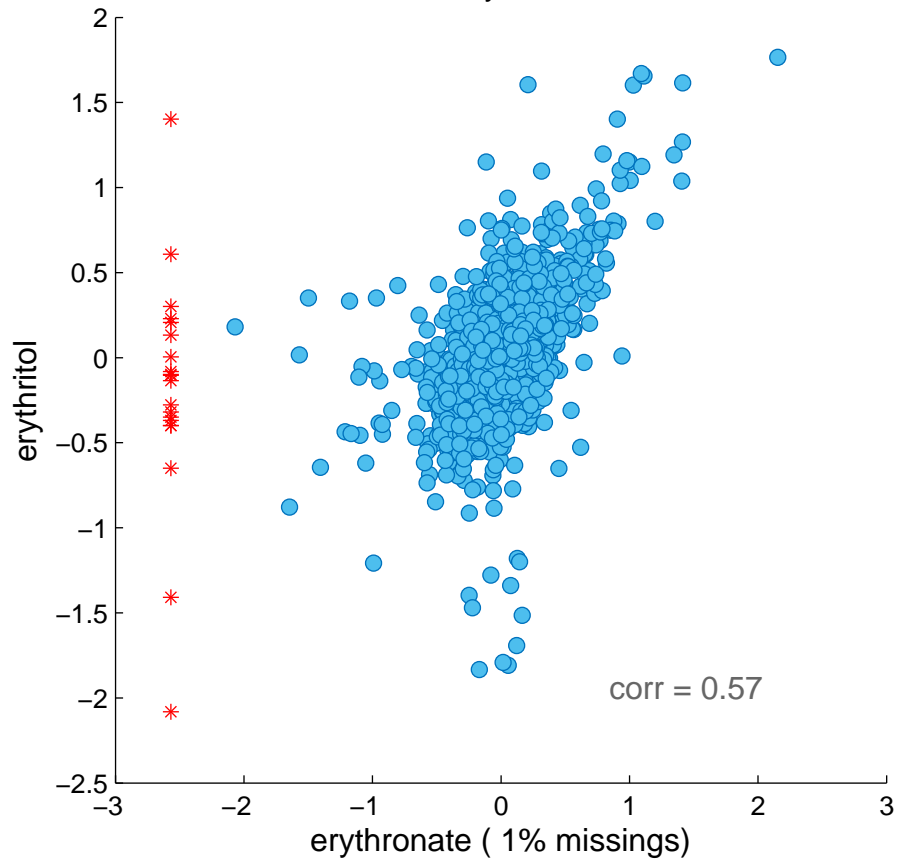

Concentrations of erythritol in missing and observed erythronate

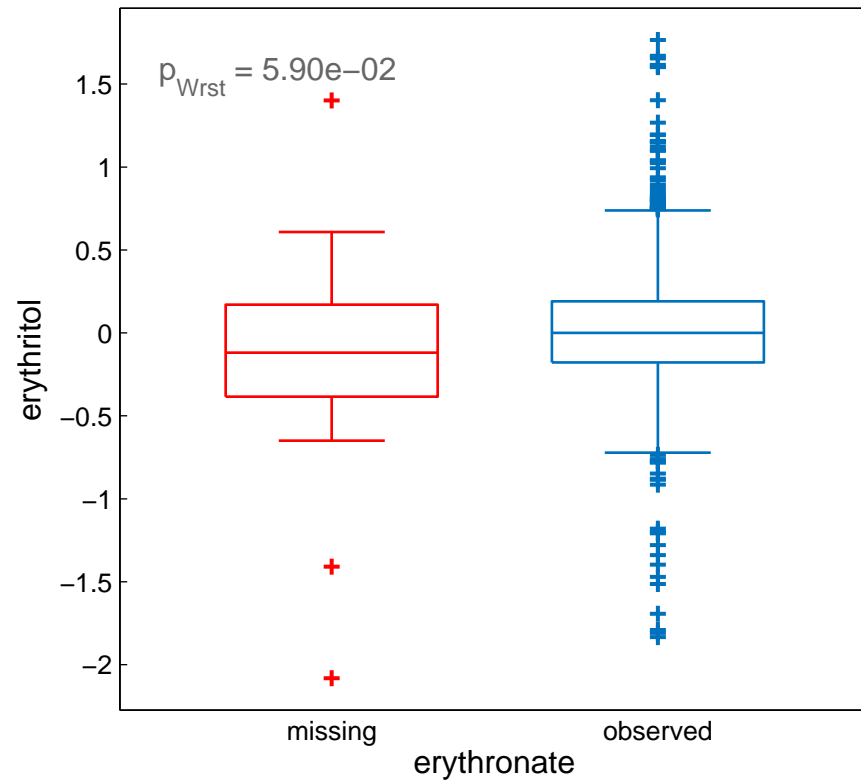

Missing values of erythrose  
in fructose

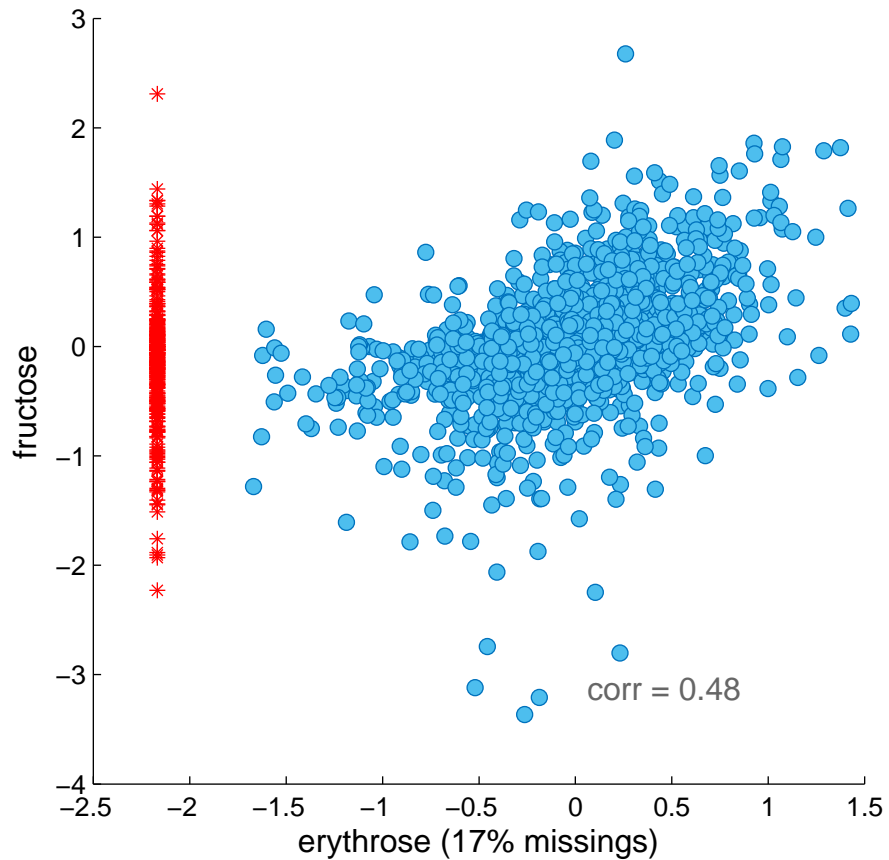

Concentrations of fructose in  
missing and observed erythrose

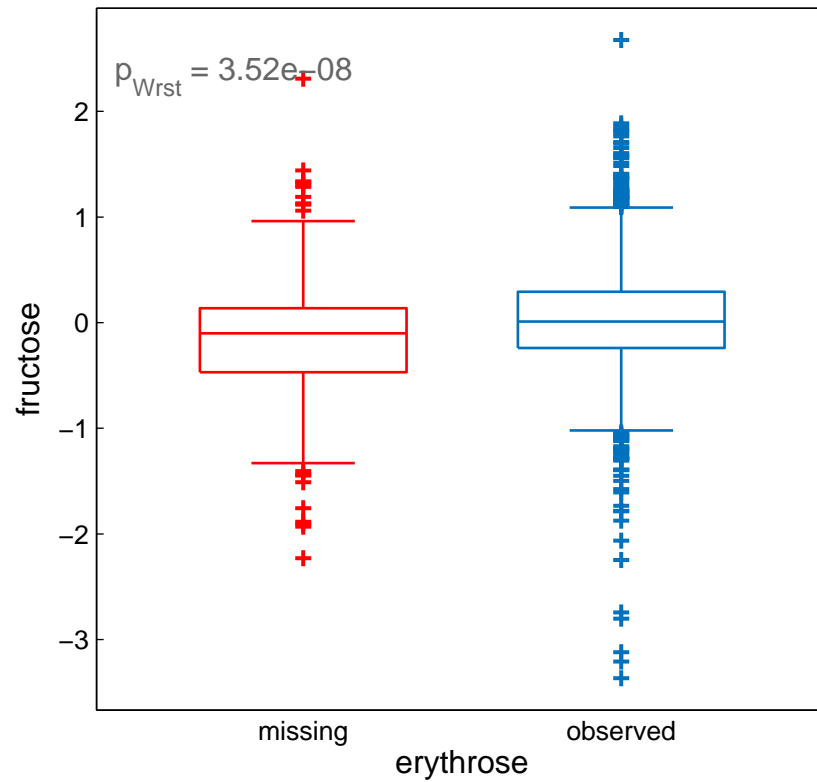

Missing values of estrone 3-sulfate  
in gamma-glutamylvaline

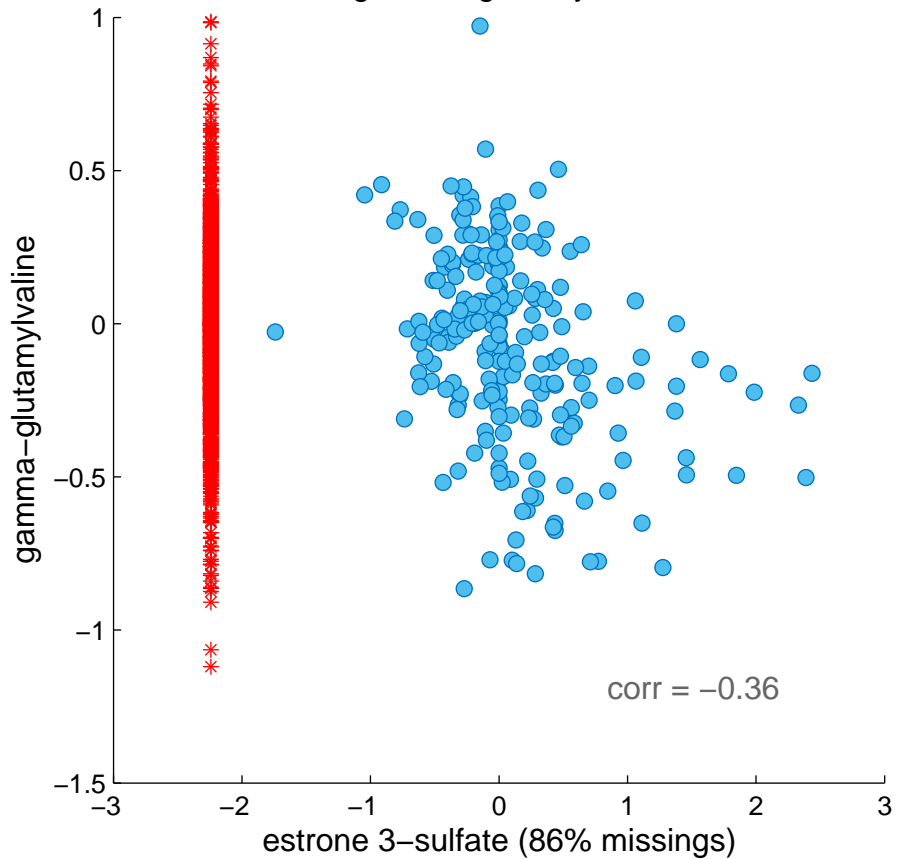

Concentrations of gamma-glutamylvaline  
in missing and observed estrone 3-sulfate

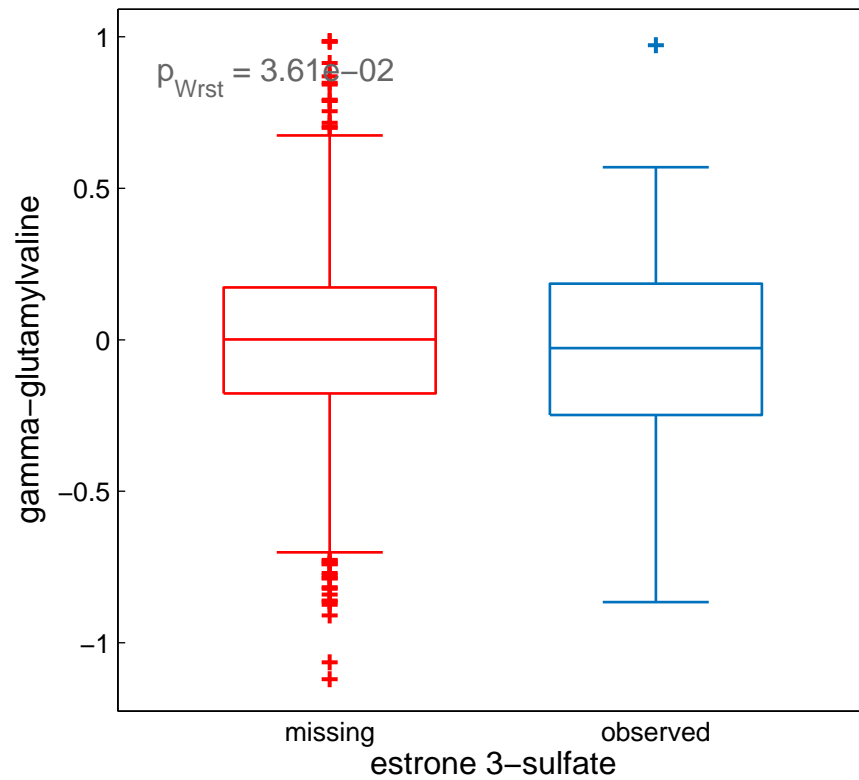

Missing values of gamma-glutamylisoleucine  
in gamma-glutamylleucine

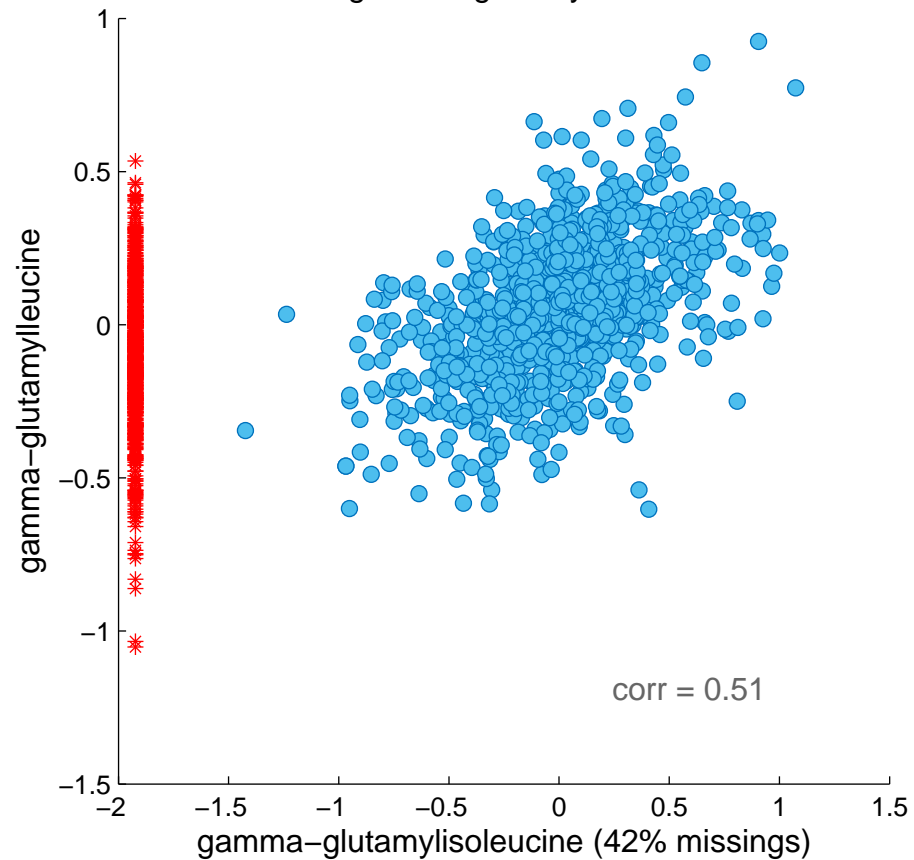

Concentrations of gamma-glutamylleucine in  
missing and observed gamma-glutamylisoleucine

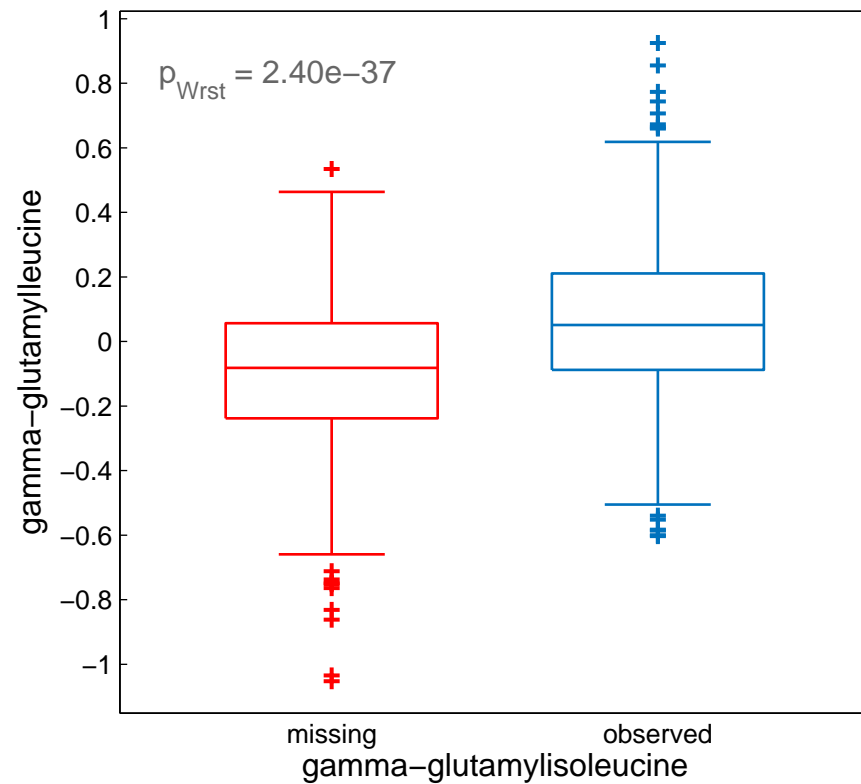

Missing values of 1-oleoylglycerol (1-monoolein)  
in 1-stearoylglycerophosphocholine

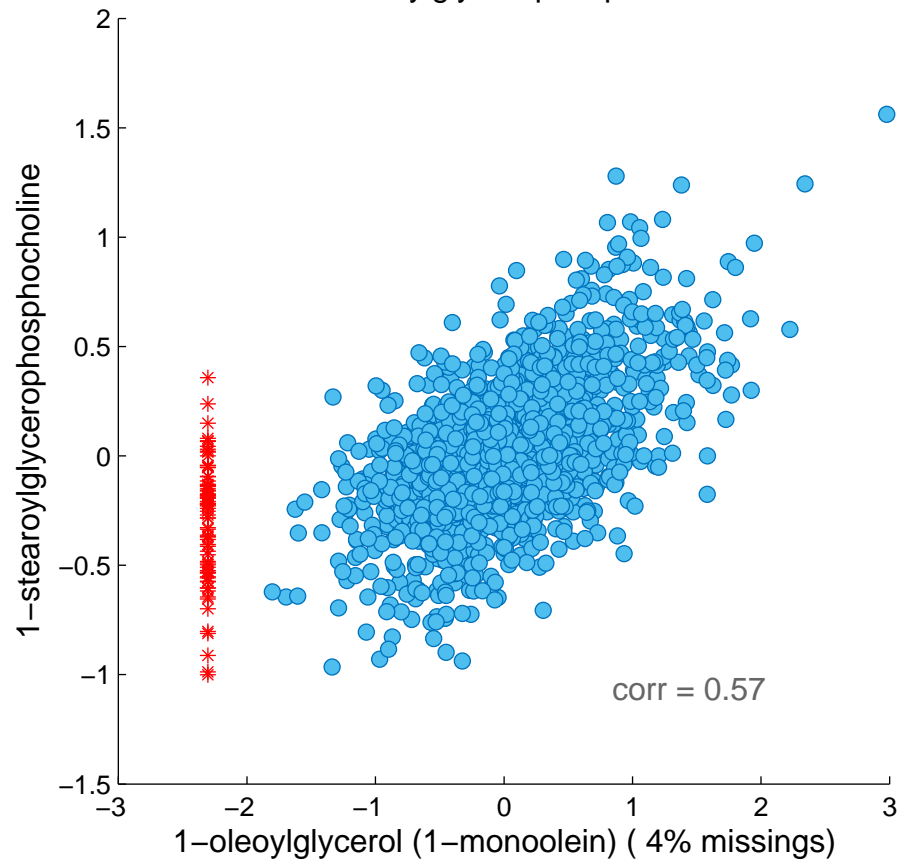

Concentrations of 1-stearoylglycerophosphocholine in  
missing and observed 1-oleoylglycerol (1-monoolein)

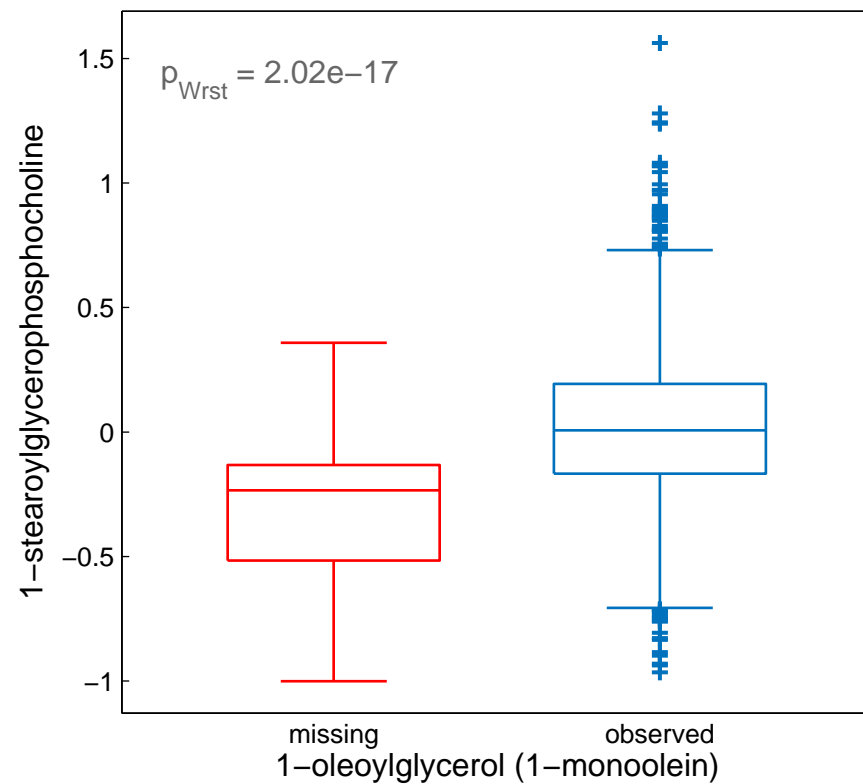



Missing values of gamma-glutamylphenylalanine  
in phenylalanine

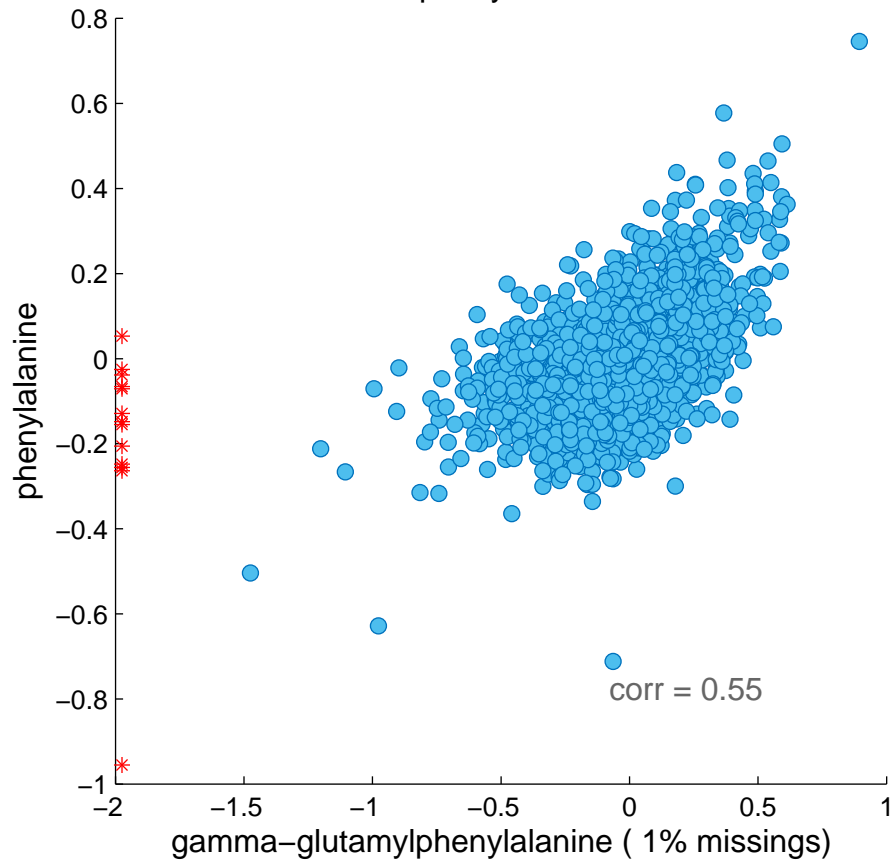

Concentrations of phenylalanine in  
missing and observed gamma-glutamylphenylalanine

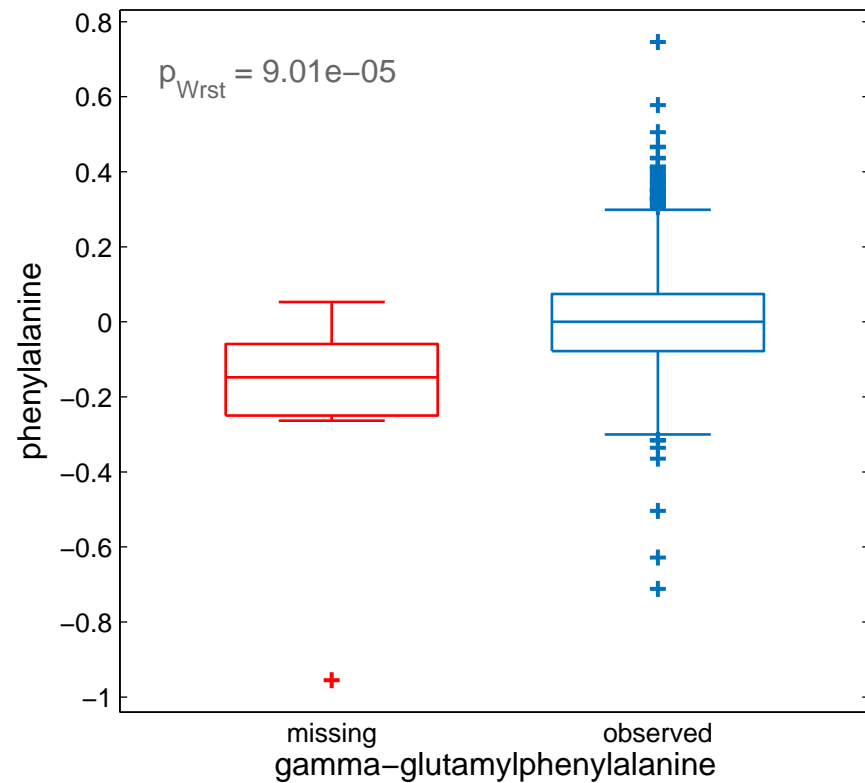

Missing values of gamma-glutamyltyrosine in tyrosine

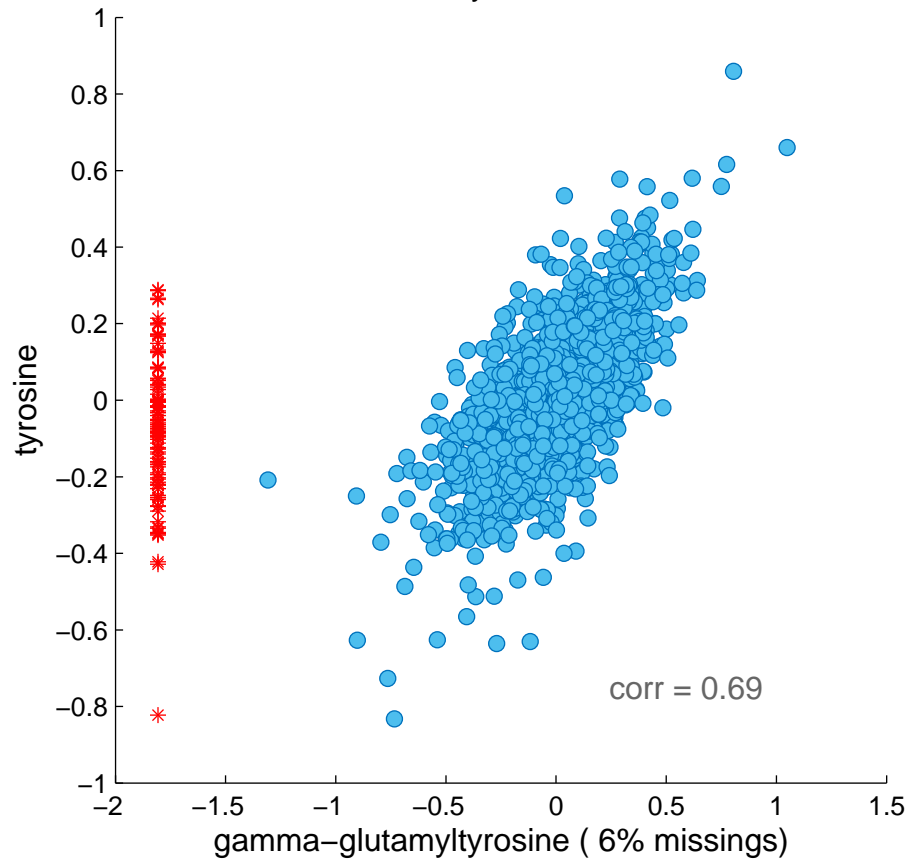

Concentrations of tyrosine in missing and observed gamma-glutamyltyrosine

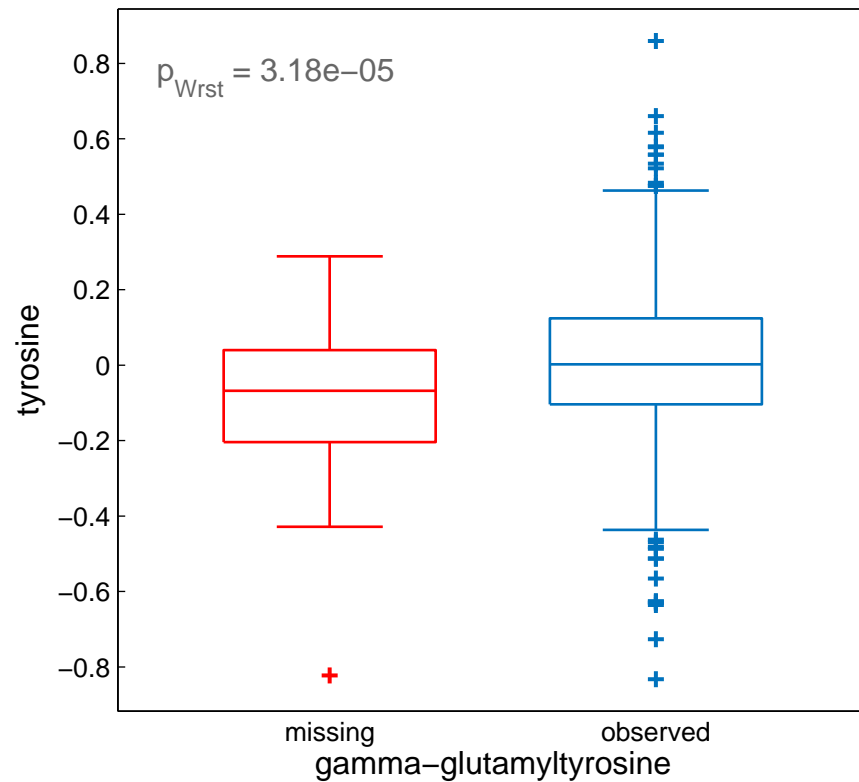

Missing values of gamma-glutamylvaline  
in gamma-glutamylleucine

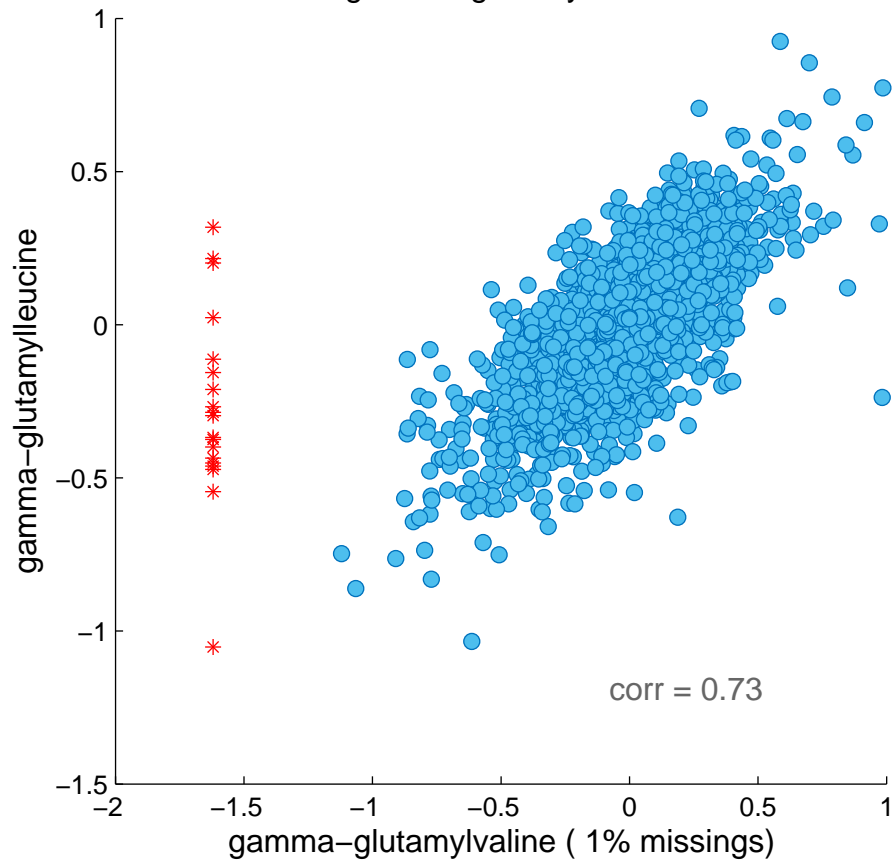

Concentrations of gamma-glutamylleucine in  
missing and observed gamma-glutamylvaline

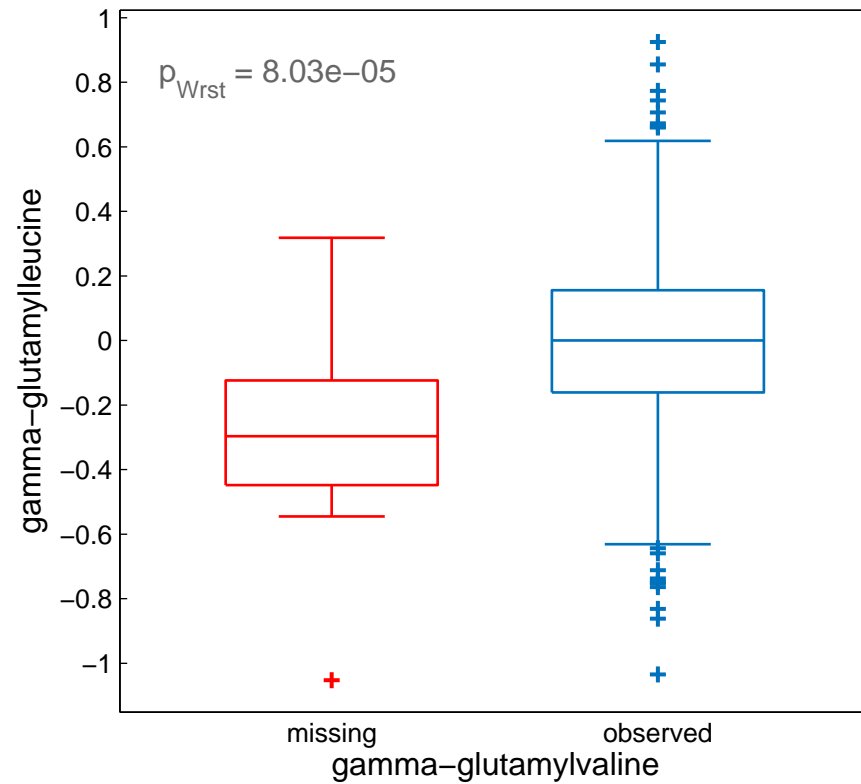

Missing values of glutaroyl carnitine  
in succinylcarnitine

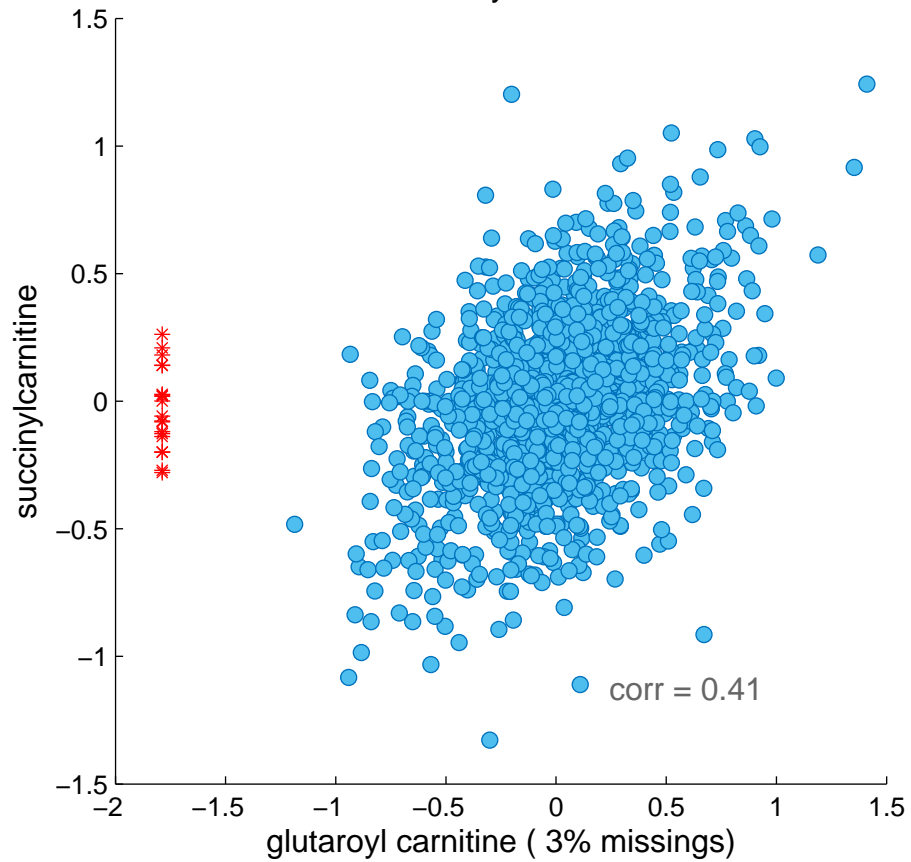

Concentrations of succinylcarnitine in  
missing and observed glutaroyl carnitine

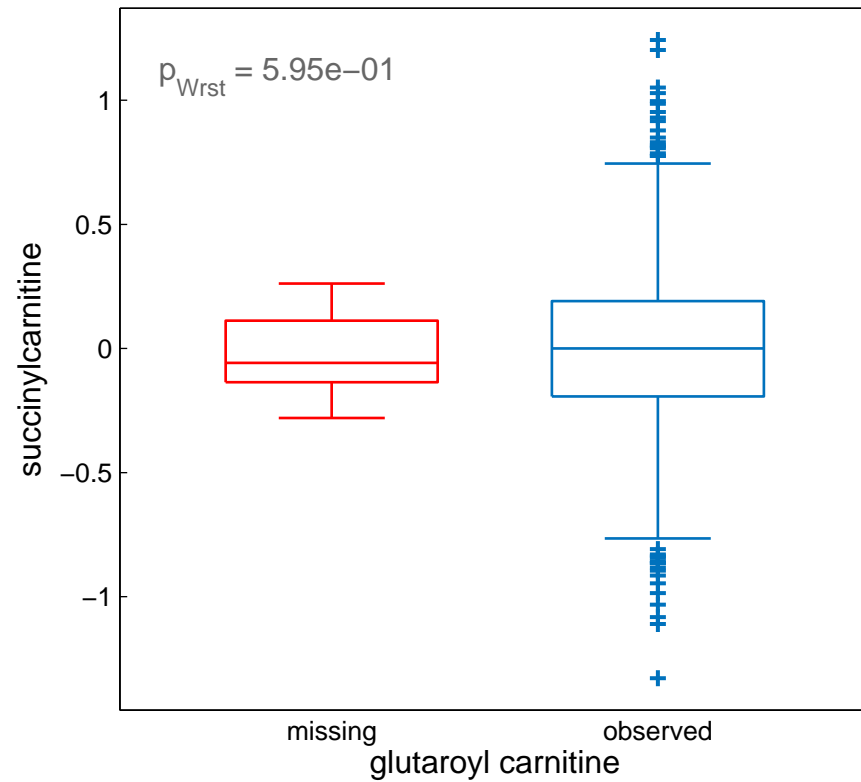

Missing values of glycerate  
in threonate

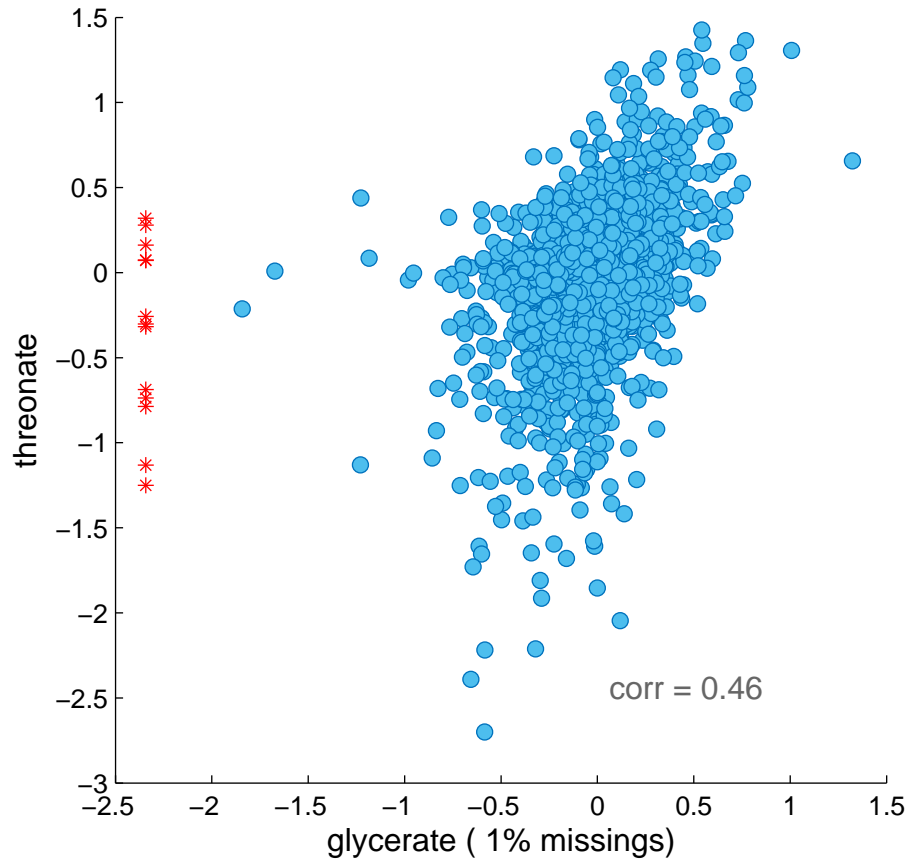

Concentrations of threonate in  
missing and observed glycerate

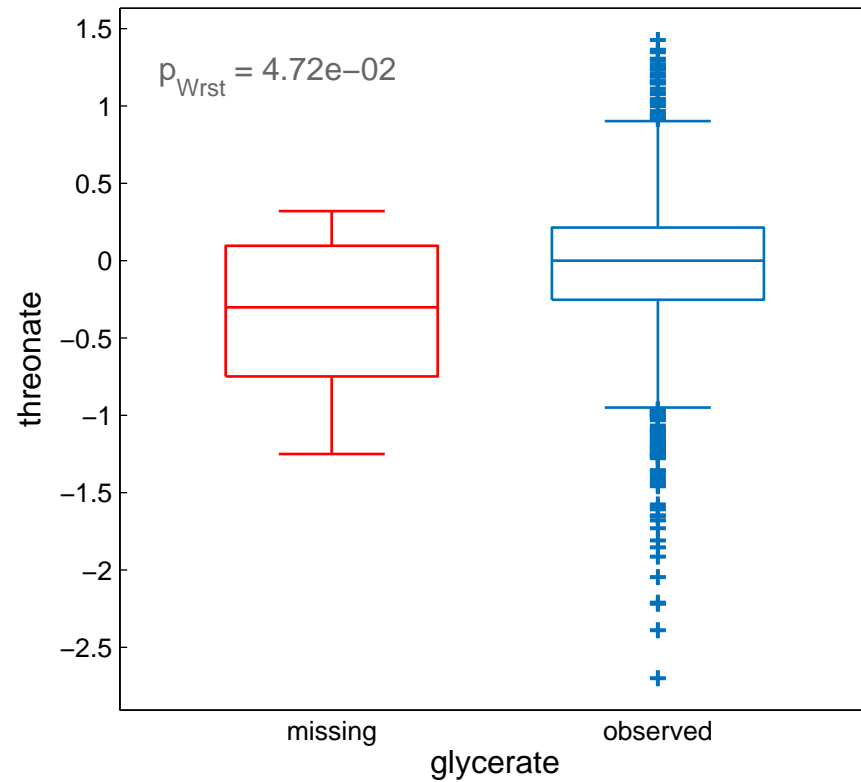

Missing values of glycerol 2-phosphate in glycerol 3-phosphate (G3P)

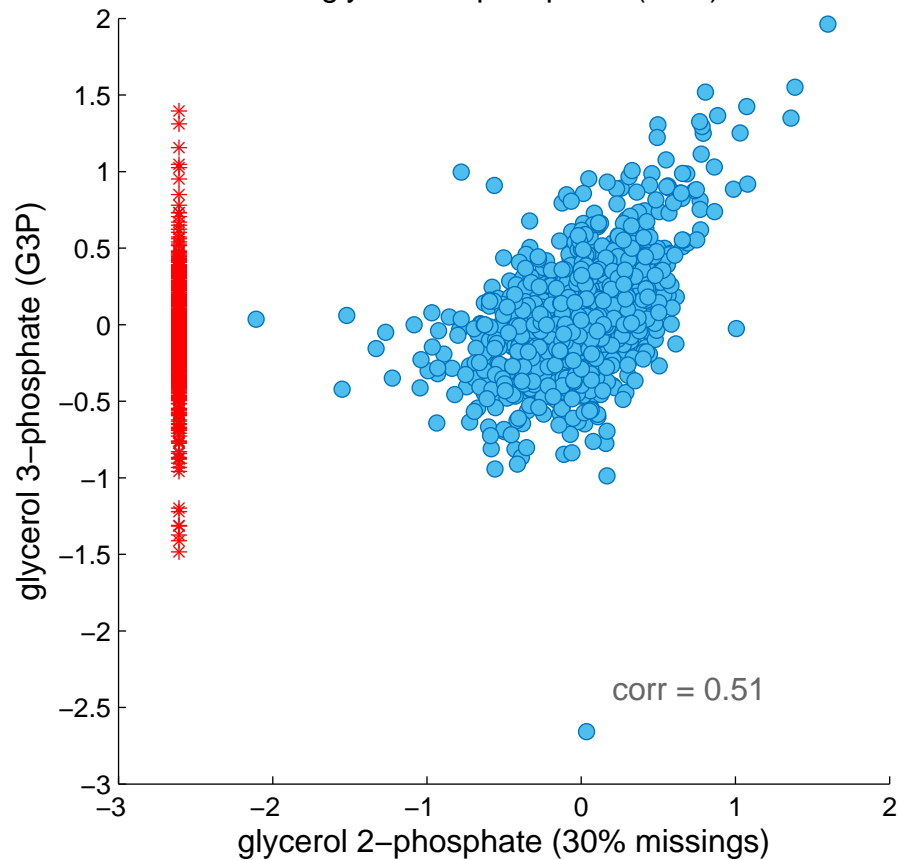

Concentrations of glycerol 3-phosphate (G3P) in missing and observed glycerol 2-phosphate

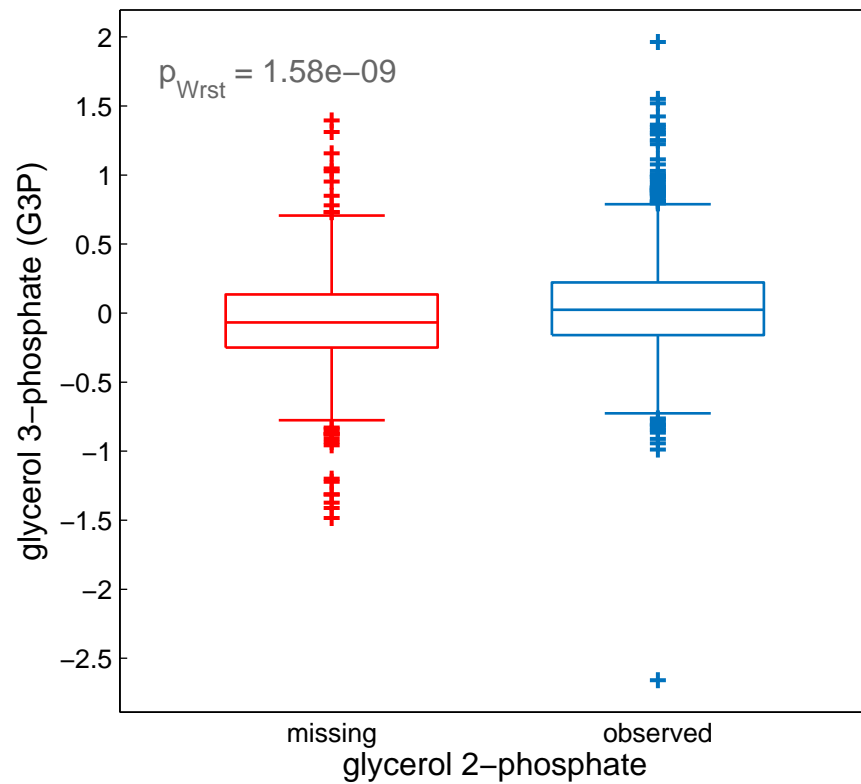

Missing values of glycerophosphorylcholine (GPC) in acetylcarnitine

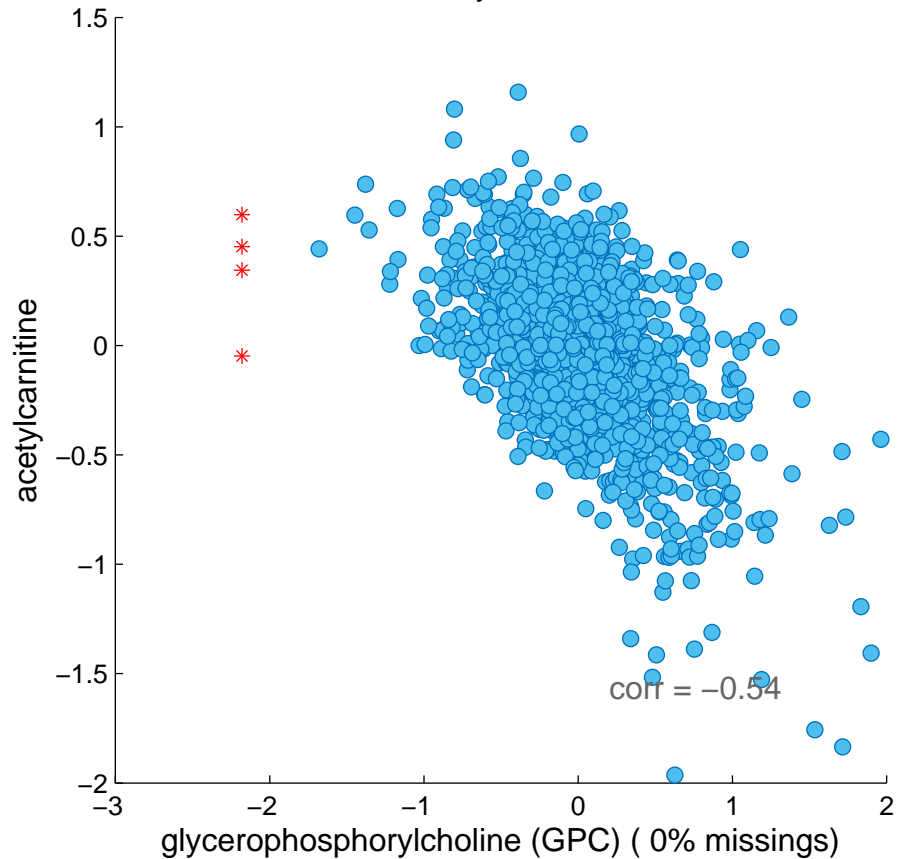

Concentrations of acetylcarnitine in missing and observed glycerophosphorylcholine (GPC)

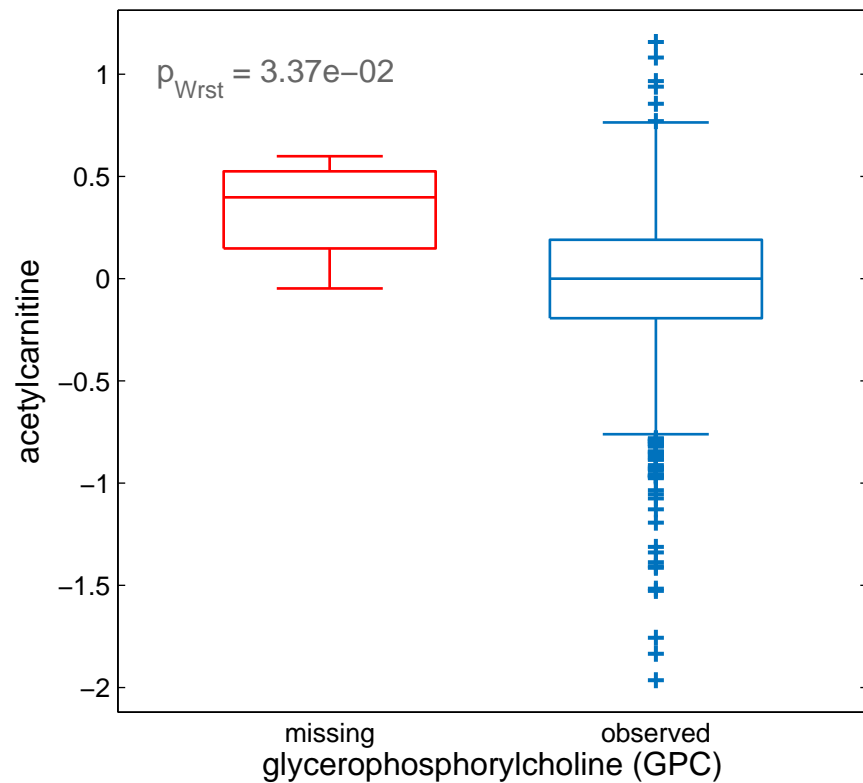

Missing values of glycochenodeoxycholate+glycodeoxycholate in glycocholate

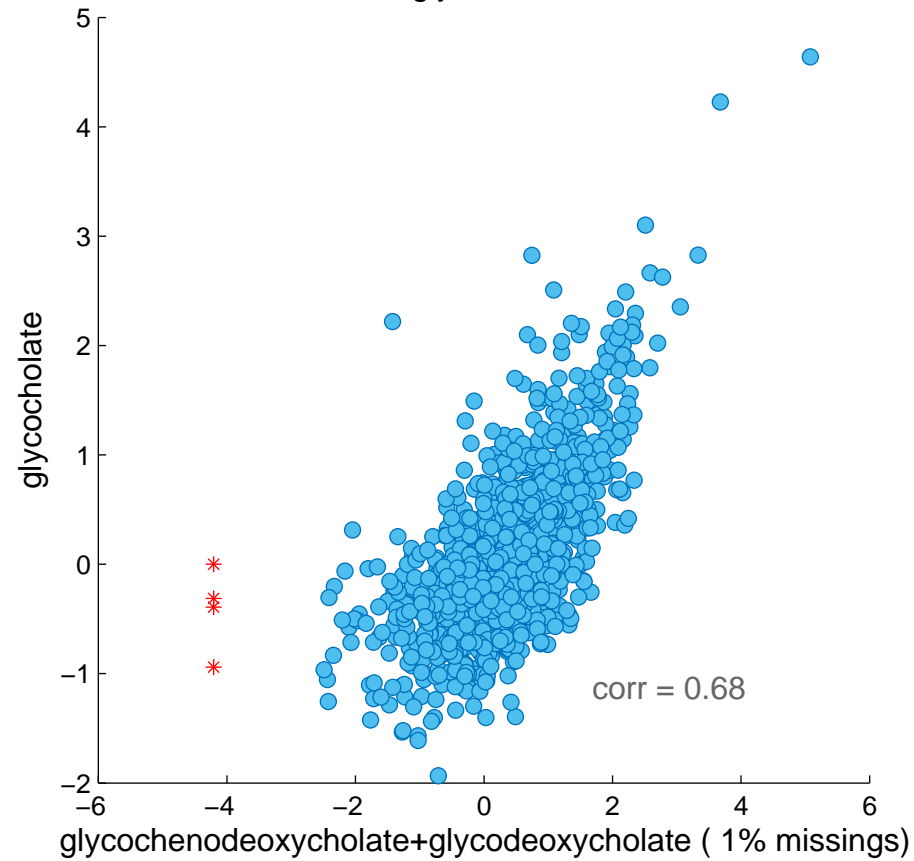

Concentrations of glycocholate in missing and observed glycochenodeoxycholate+glycodeoxycholate

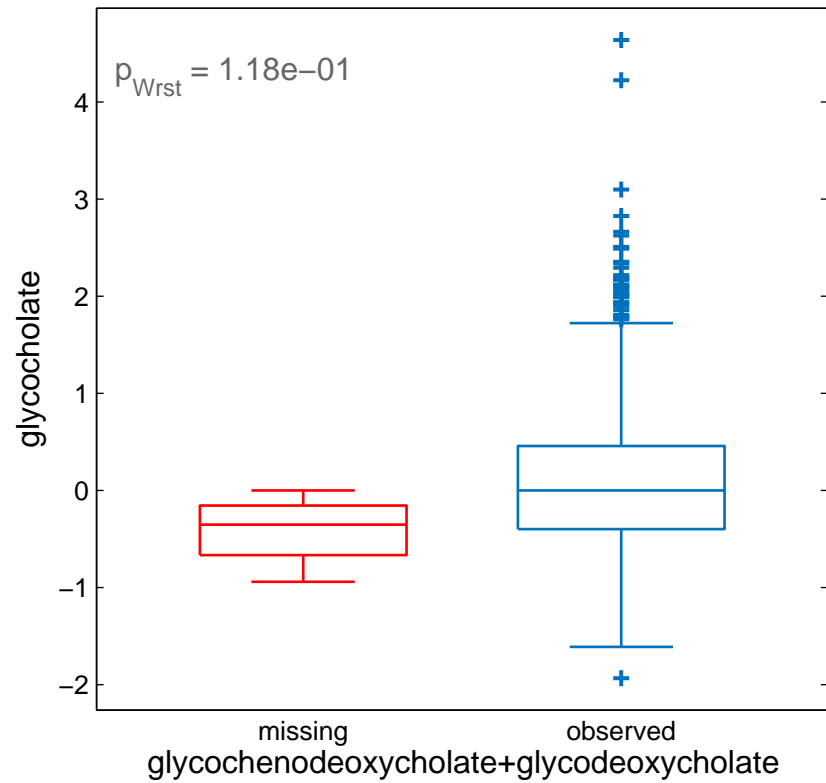



Missing values of glycocholate in taurocholate

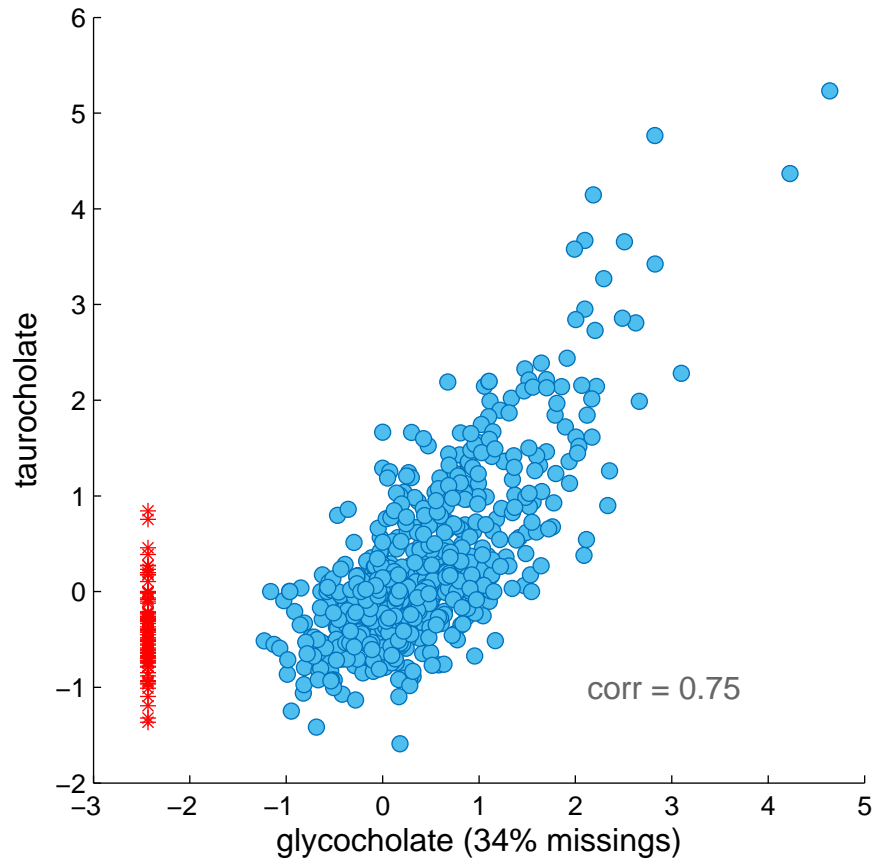

Concentrations of taurocholate in missing and observed glycocholate

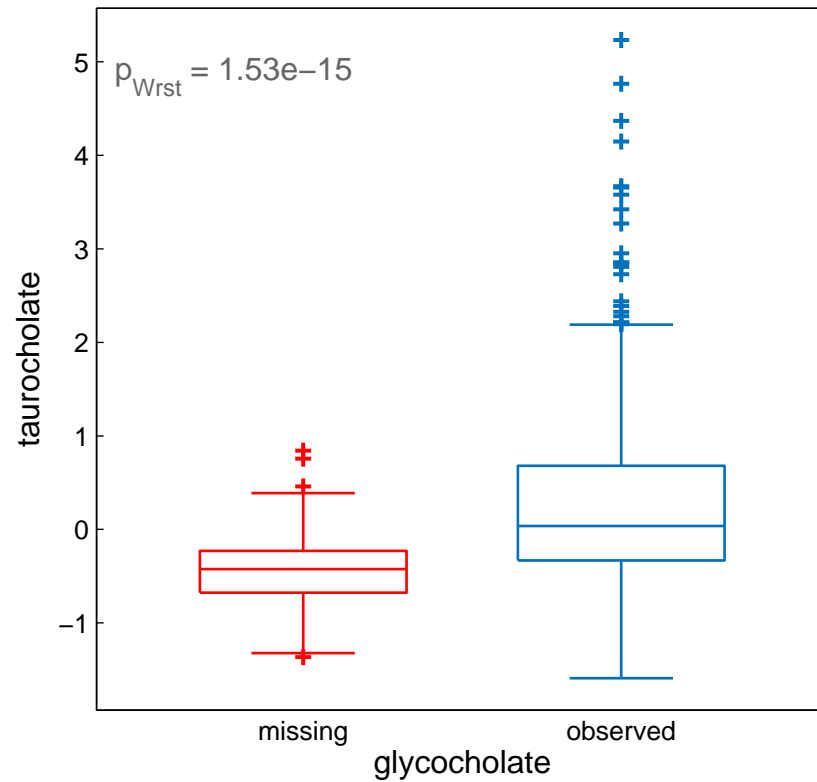

Missing values of glycylvaline  
in X-11805

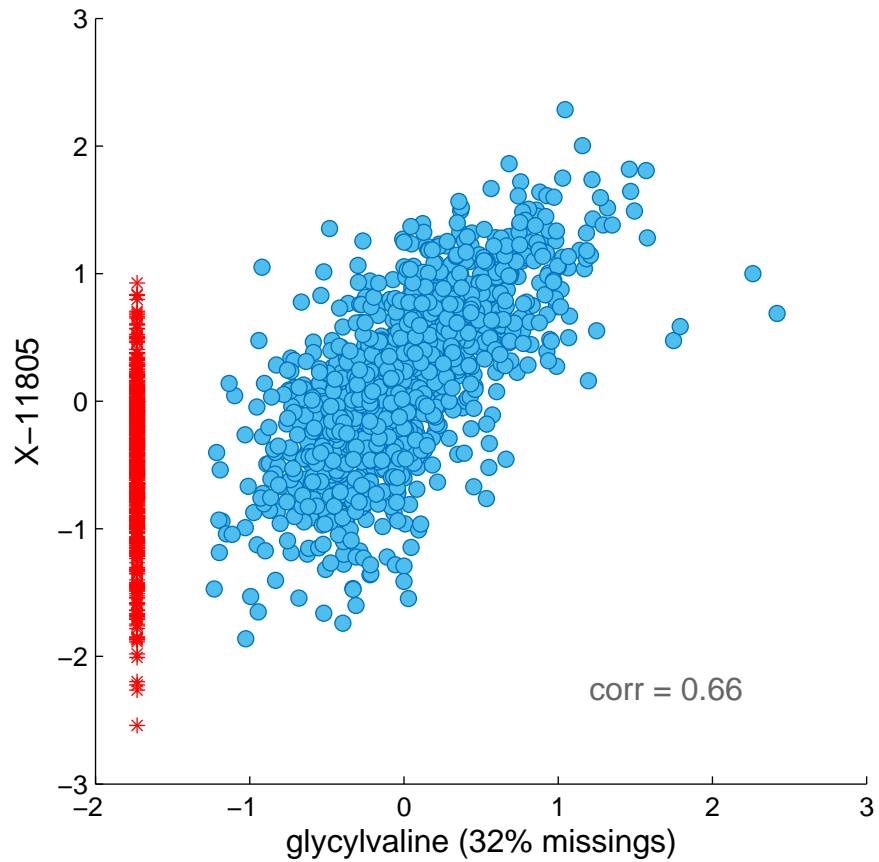

Concentrations of X-11805 in  
missing and observed glycylvaline

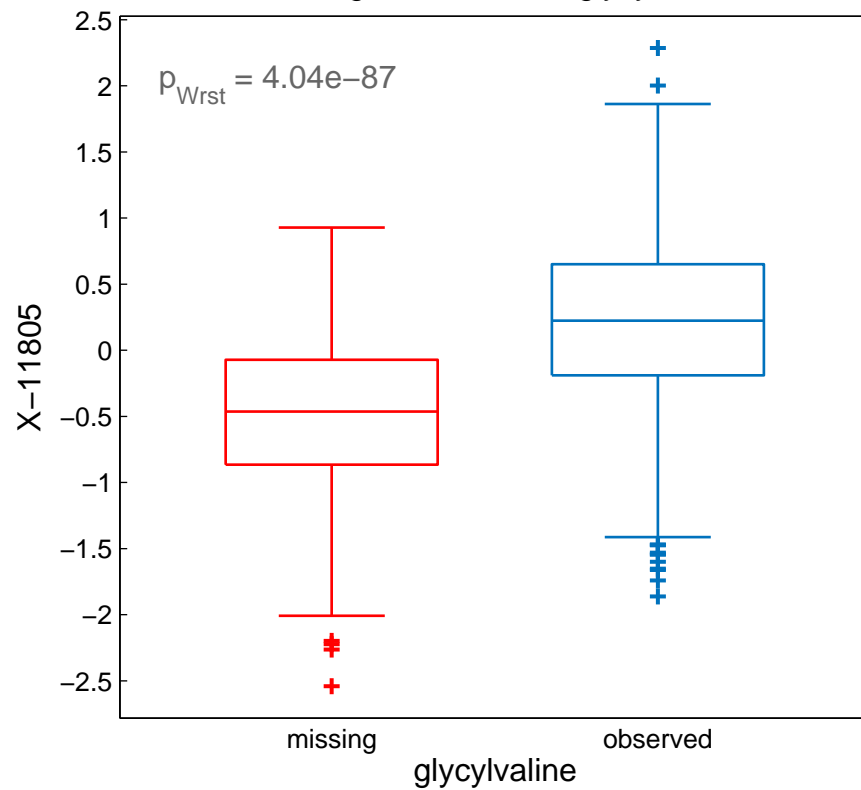

Missing values of guanosine  
in inosine

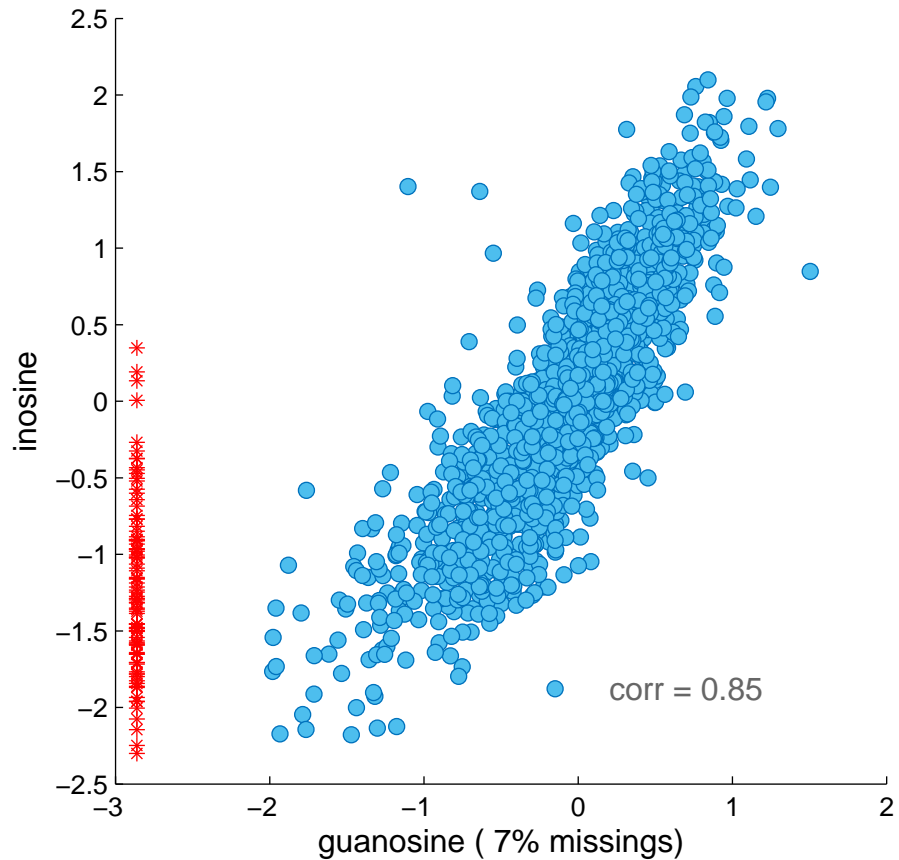

Concentrations of inosine in  
missing and observed guanosine

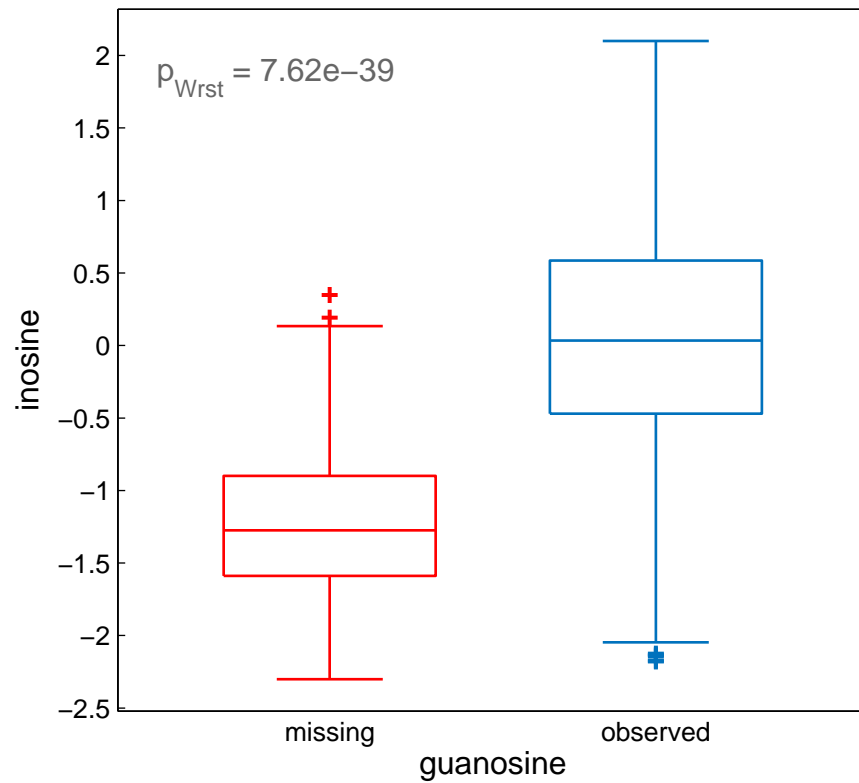

Missing values of 1-oleoylglycerophosphoethanolamine in 1-linoleoylglycerophosphoethanolamine

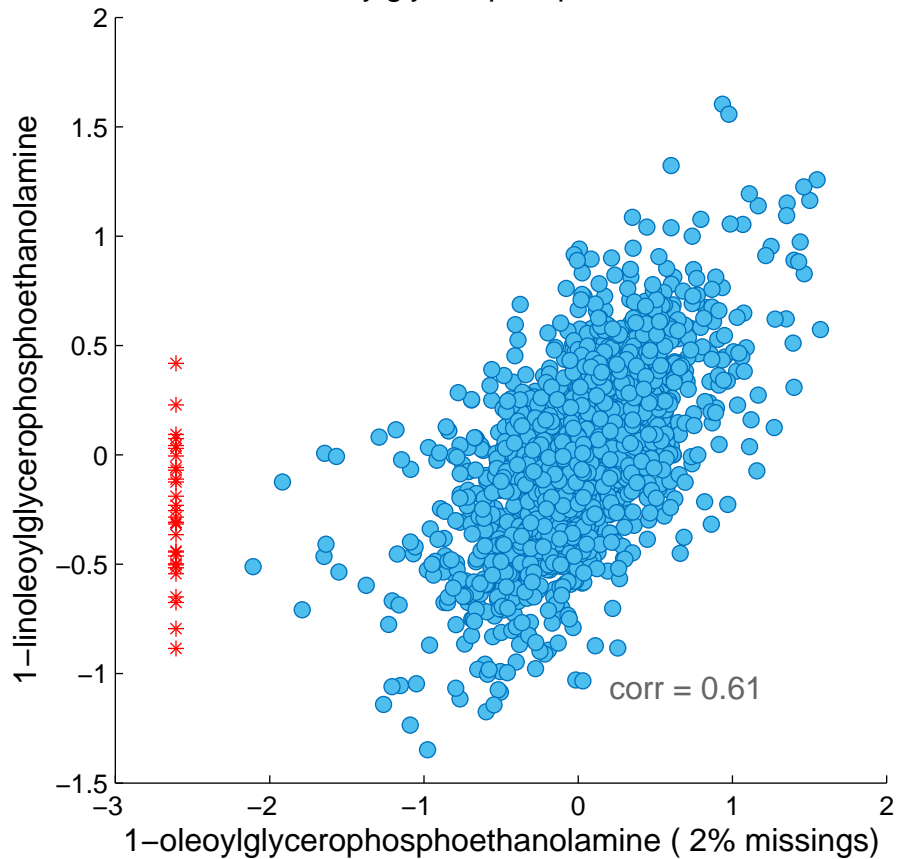

Concentrations of 1-linoleoylglycerophosphoethanolamine in missing and observed 1-oleoylglycerophosphoethanolamine

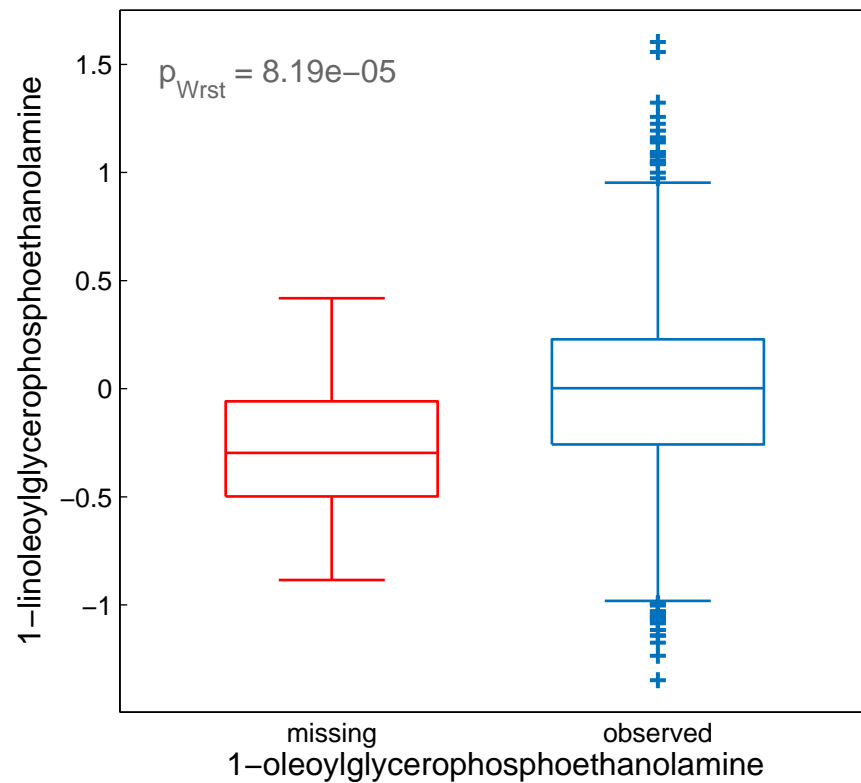

Missing values of hexadecanedioate  
in tetradecanedioate

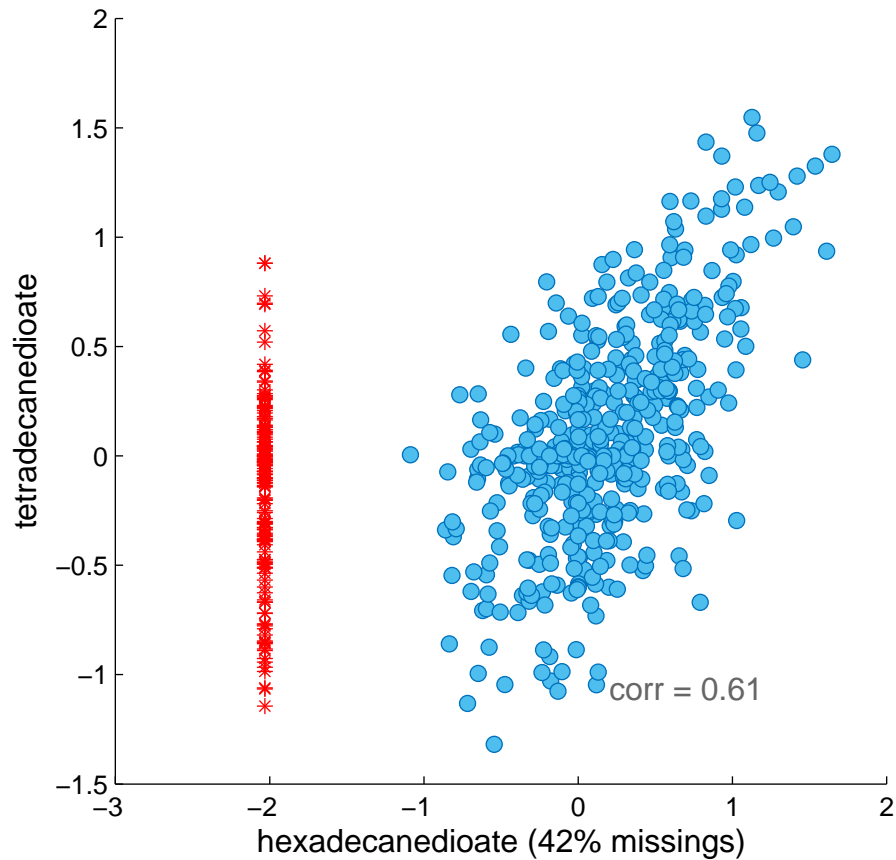

Concentrations of tetradecanedioate in  
missing and observed hexadecanedioate

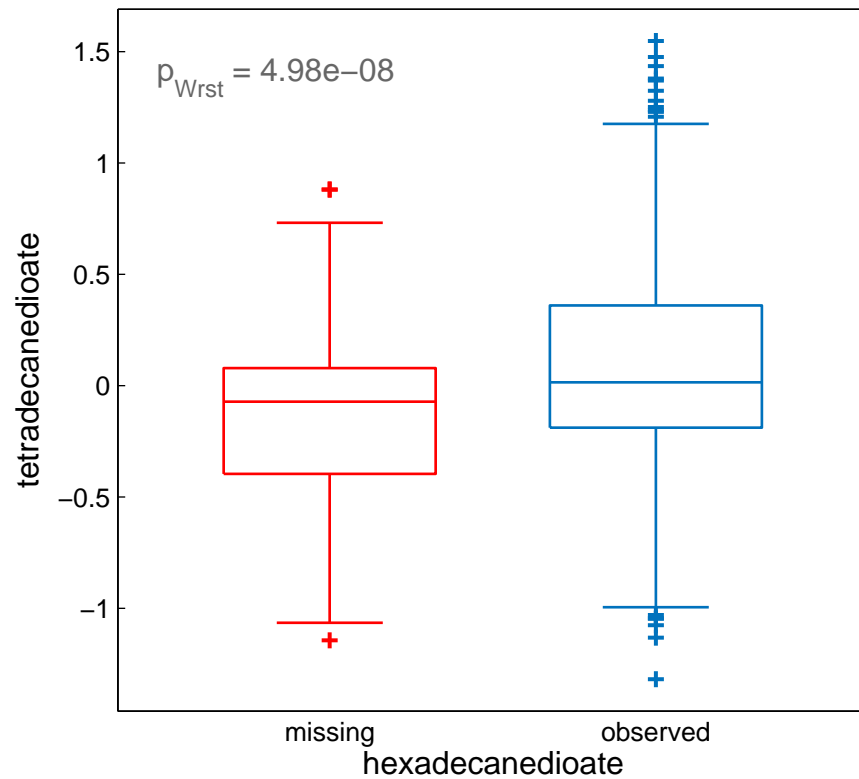

Missing values of homocitrulline  
in C-glycosyltryptophan

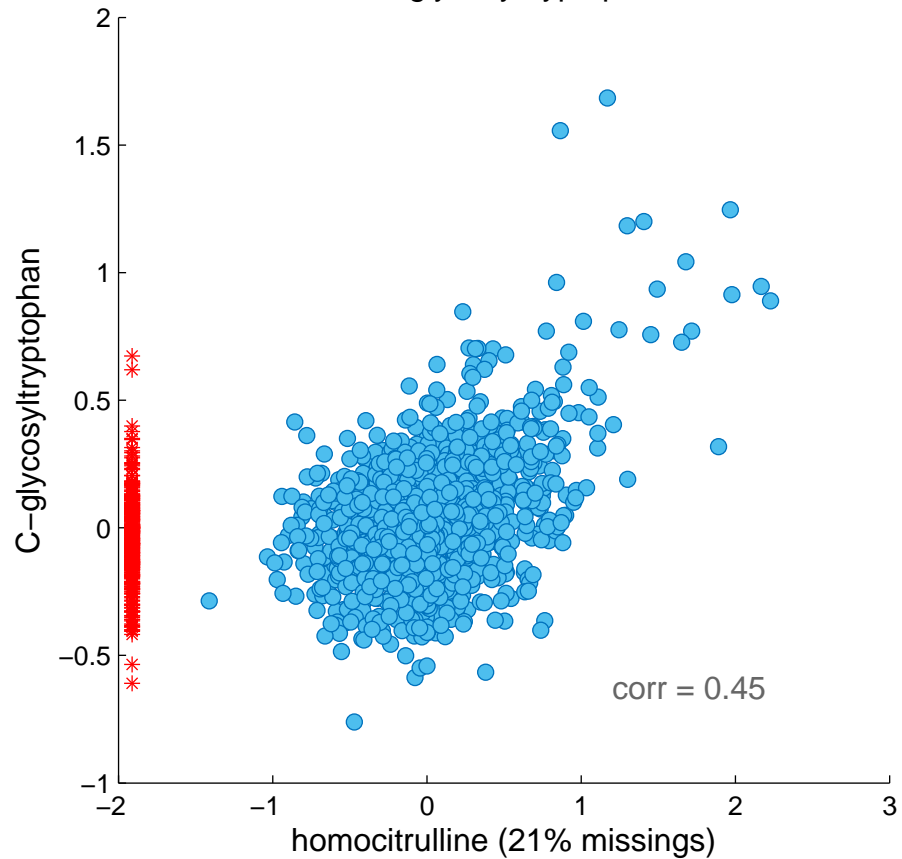

Concentrations of C-glycosyltryptophan in  
missing and observed homocitrulline

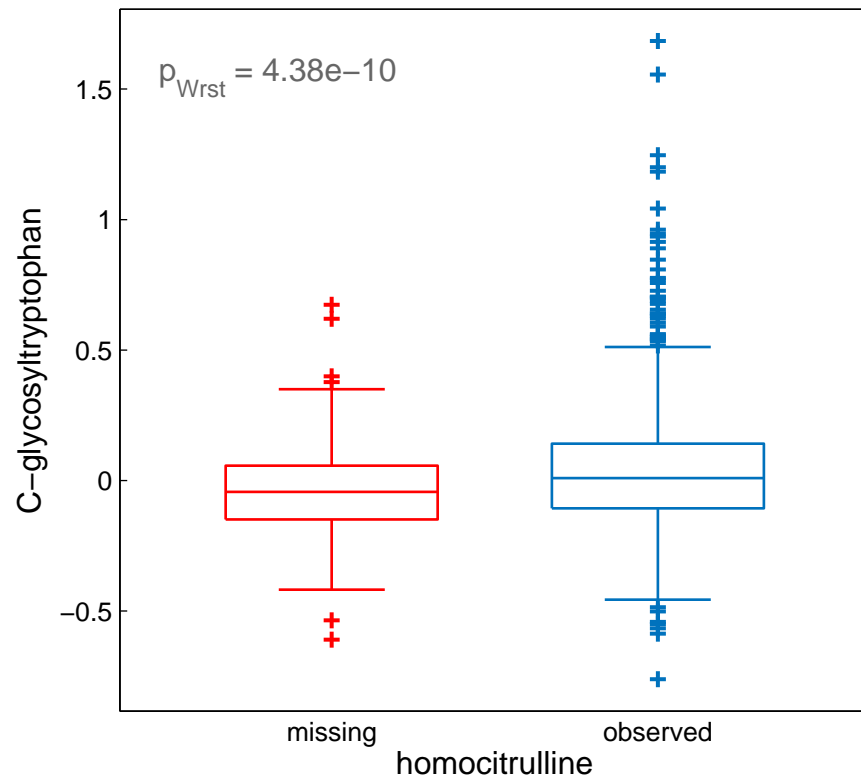

Missing values of hydroquinone sulfate  
in X-12007

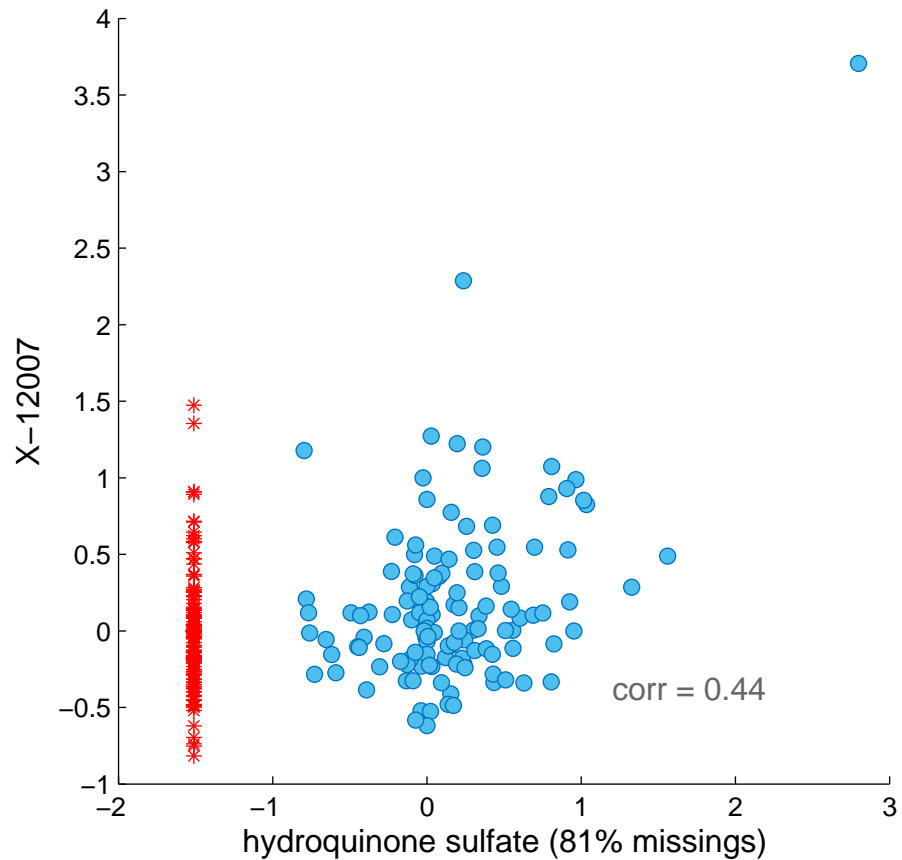

Concentrations of X-12007 in  
missing and observed hydroquinone sulfate

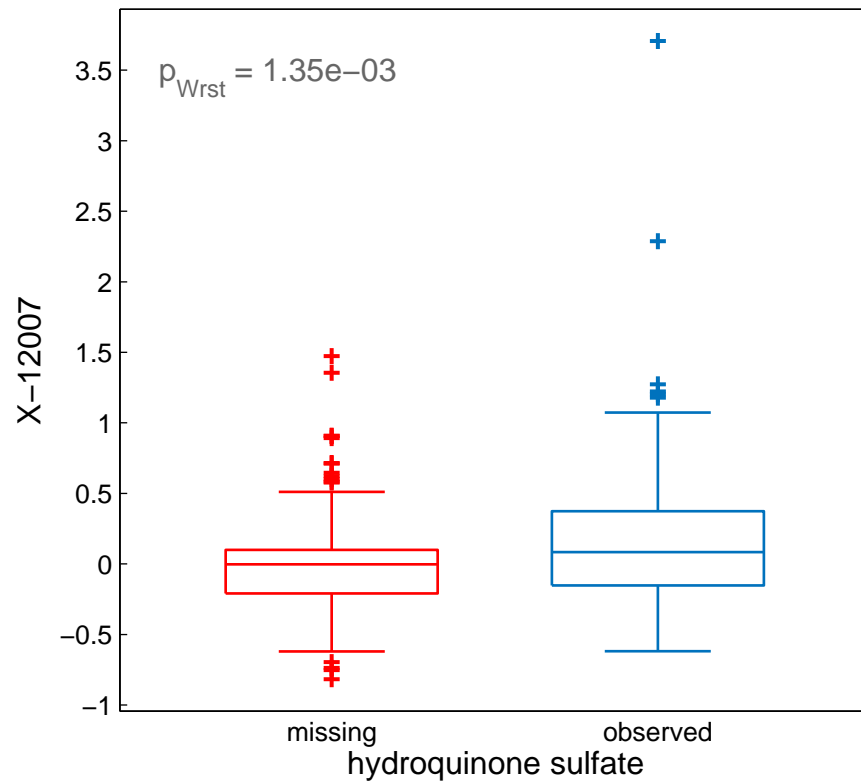

Missing values of hyodeoxycholate  
in ursodeoxycholate

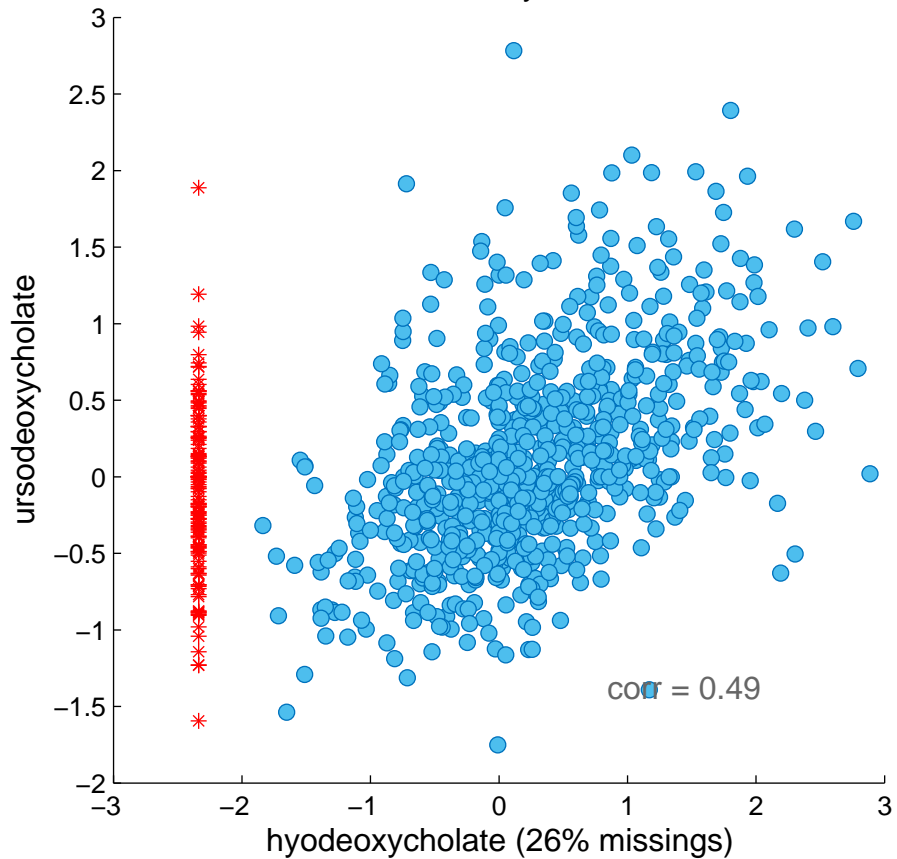

Concentrations of ursodeoxycholate in  
missing and observed hyodeoxycholate

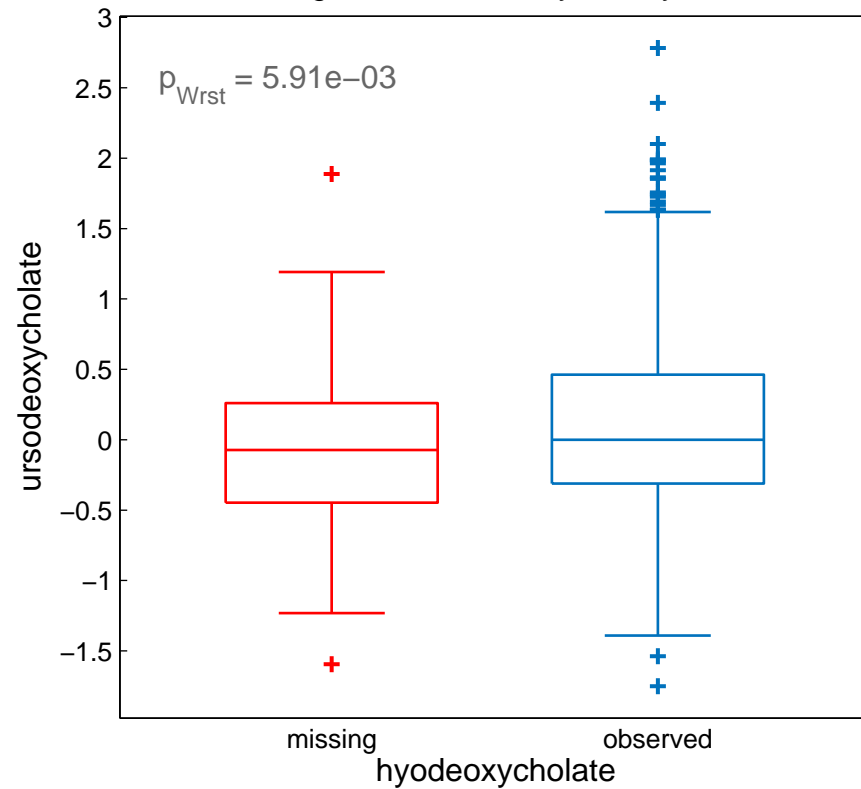



Missing values of hypoxanthine  
in X-11422

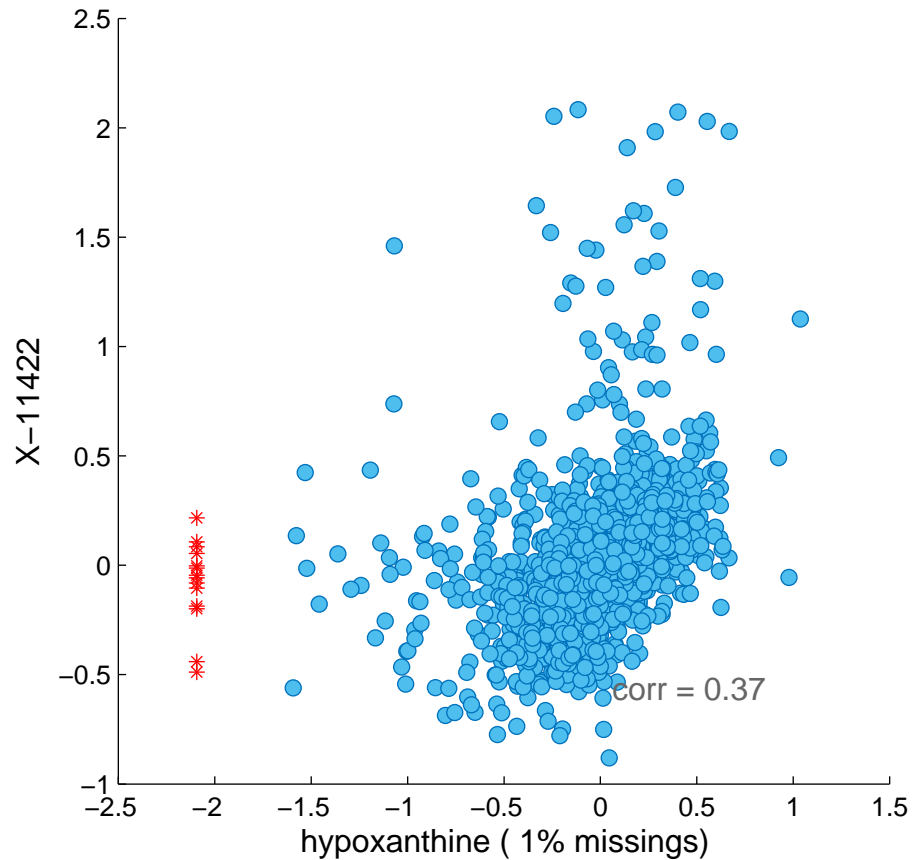

Concentrations of X-11422 in  
missing and observed hypoxanthine

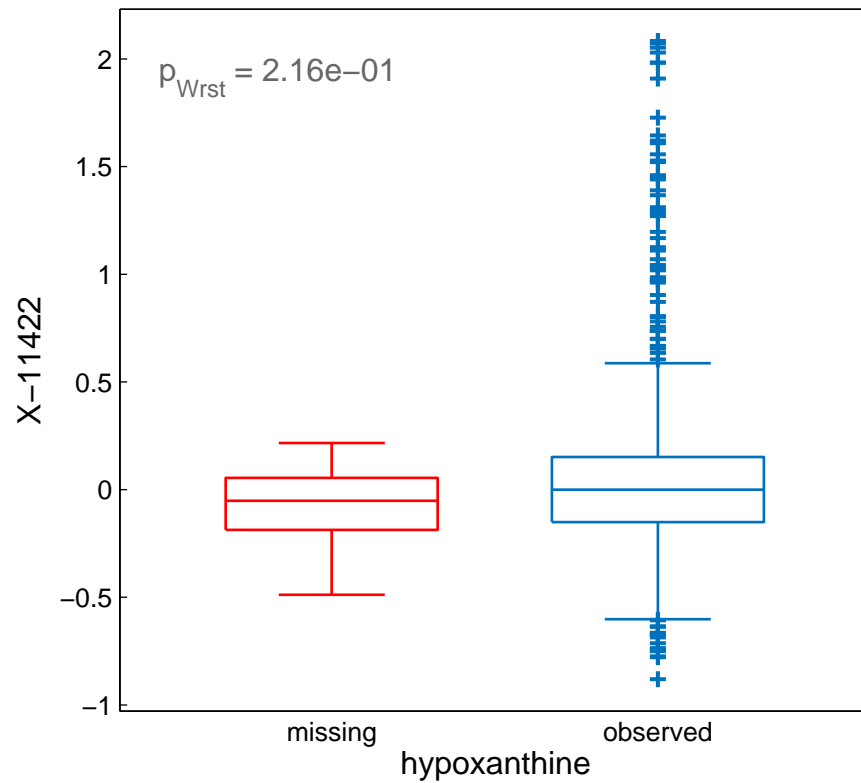

Missing values of indoleacetate  
in X-11850

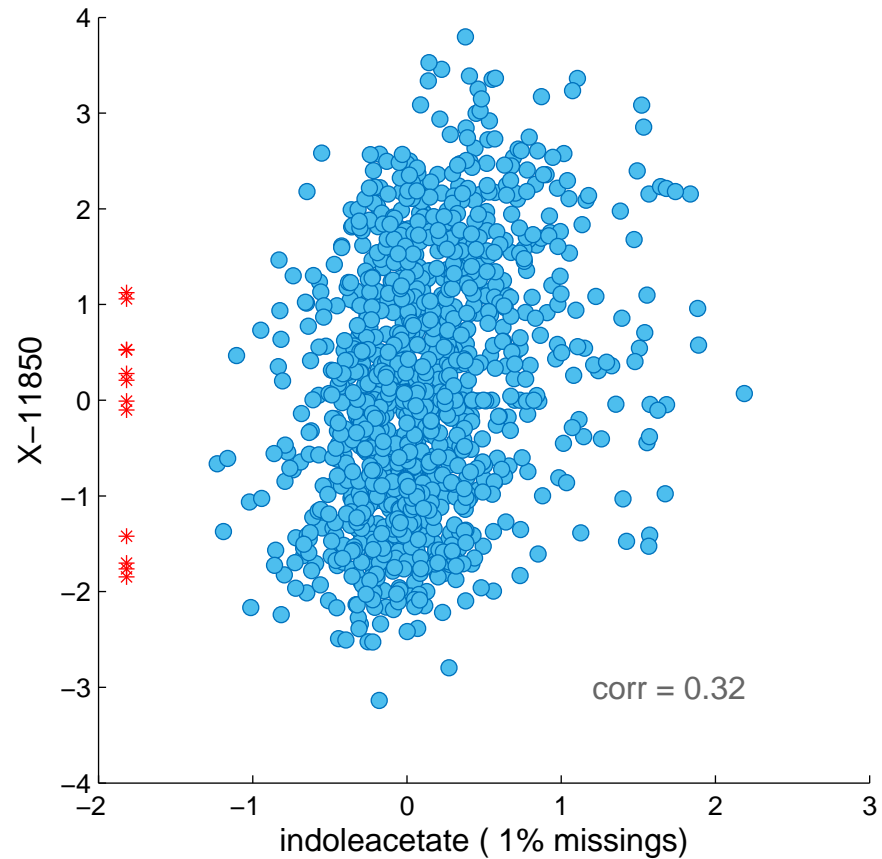

Concentrations of X-11850 in  
missing and observed indoleacetate

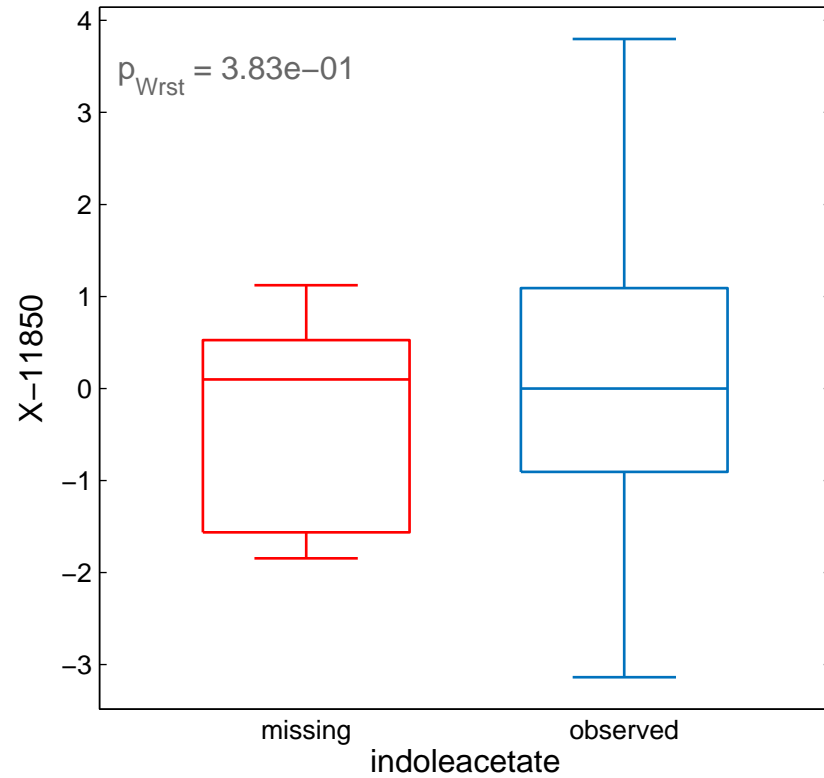

Missing values of indolelactate  
in 3-(4-hydroxyphenyl)lactate

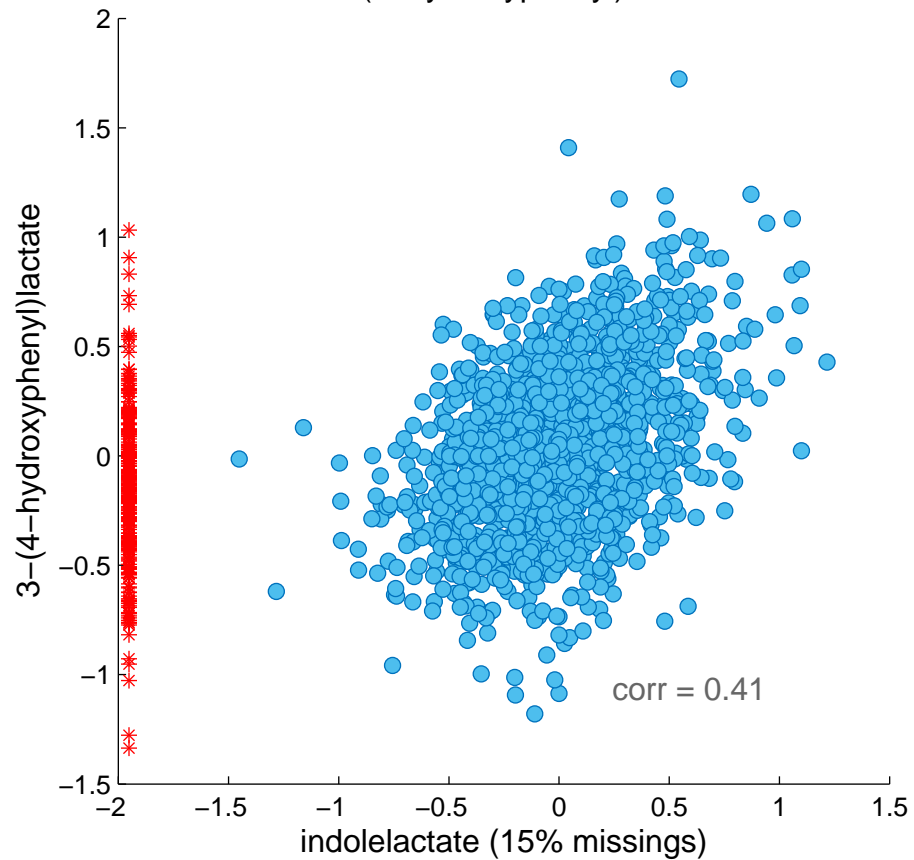

Concentrations of 3-(4-hydroxyphenyl)lactate in  
missing and observed indolelactate

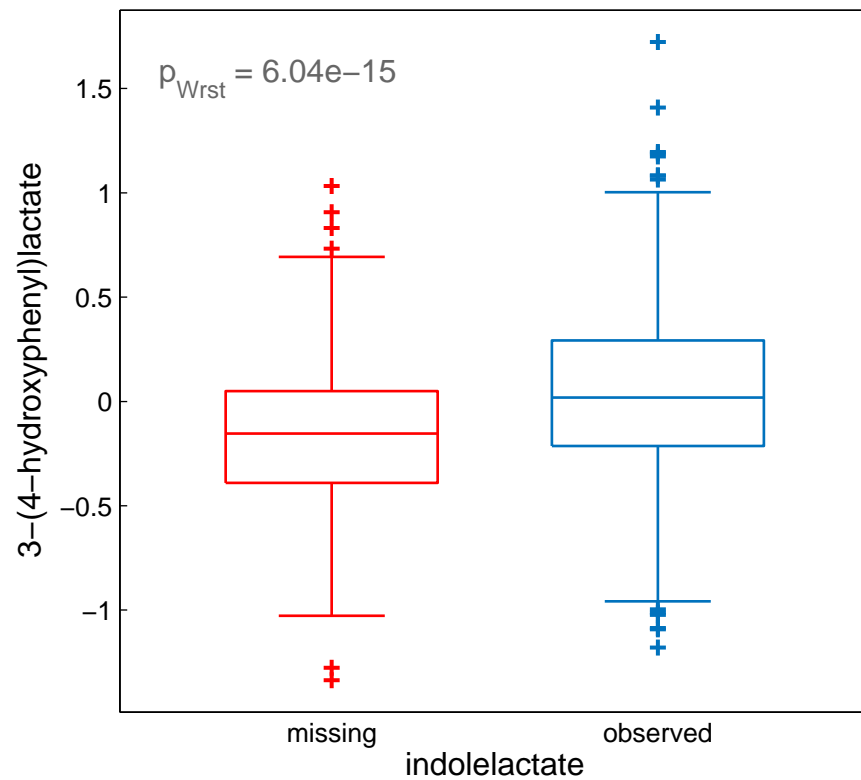

Missing values of inosine  
in guanosine

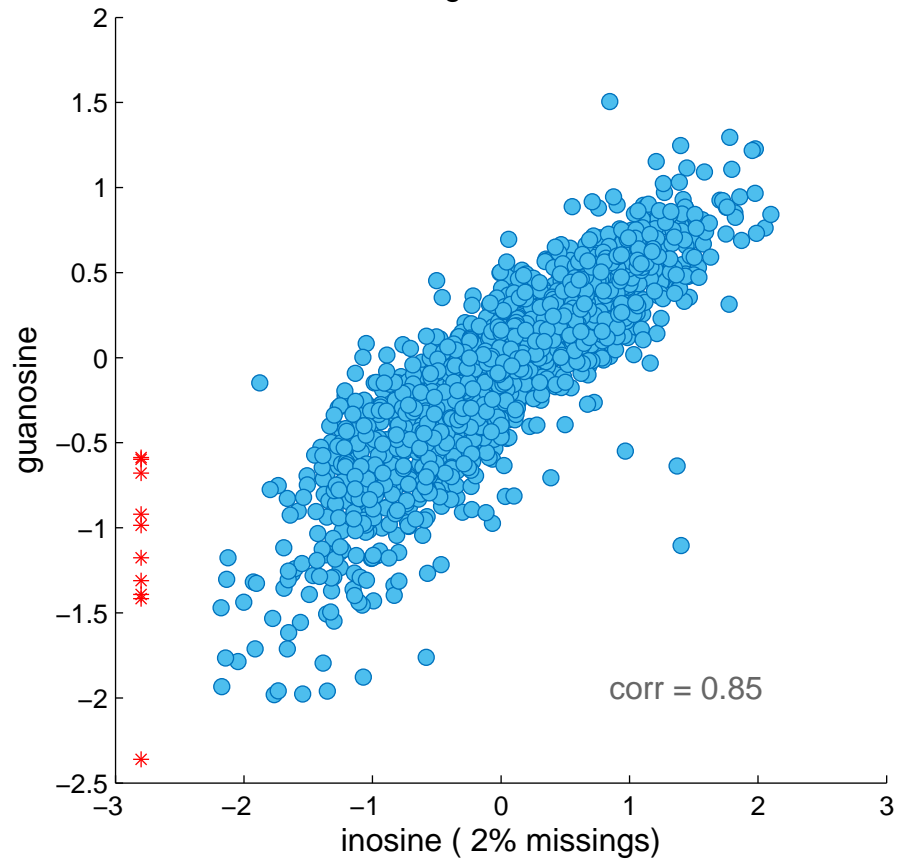

Concentrations of guanosine in  
missing and observed inosine

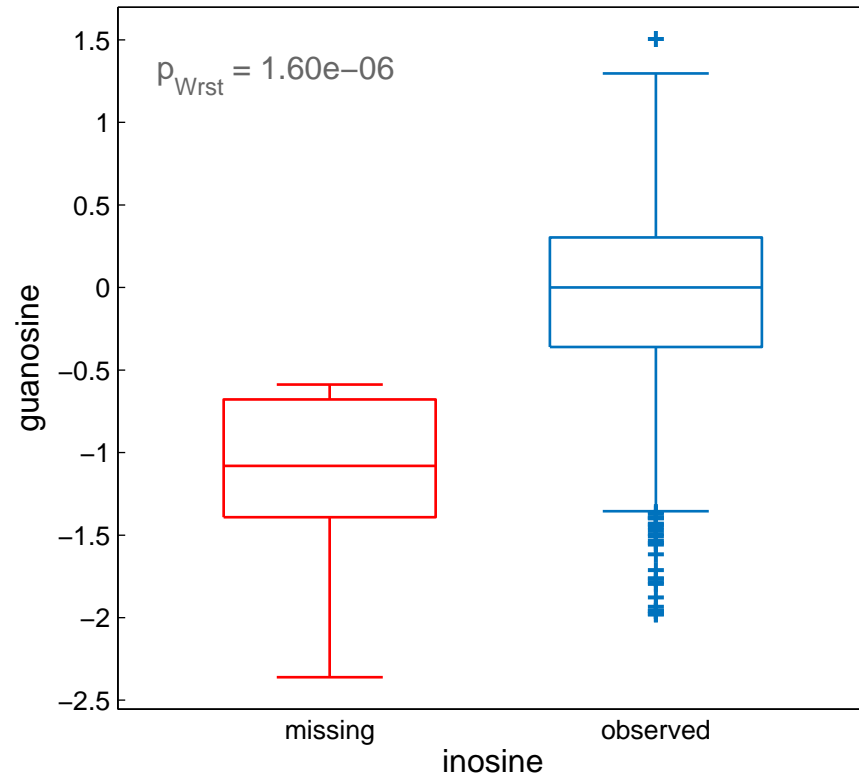

Missing values of inositol 1-phosphate (I1P)  
in X-03094

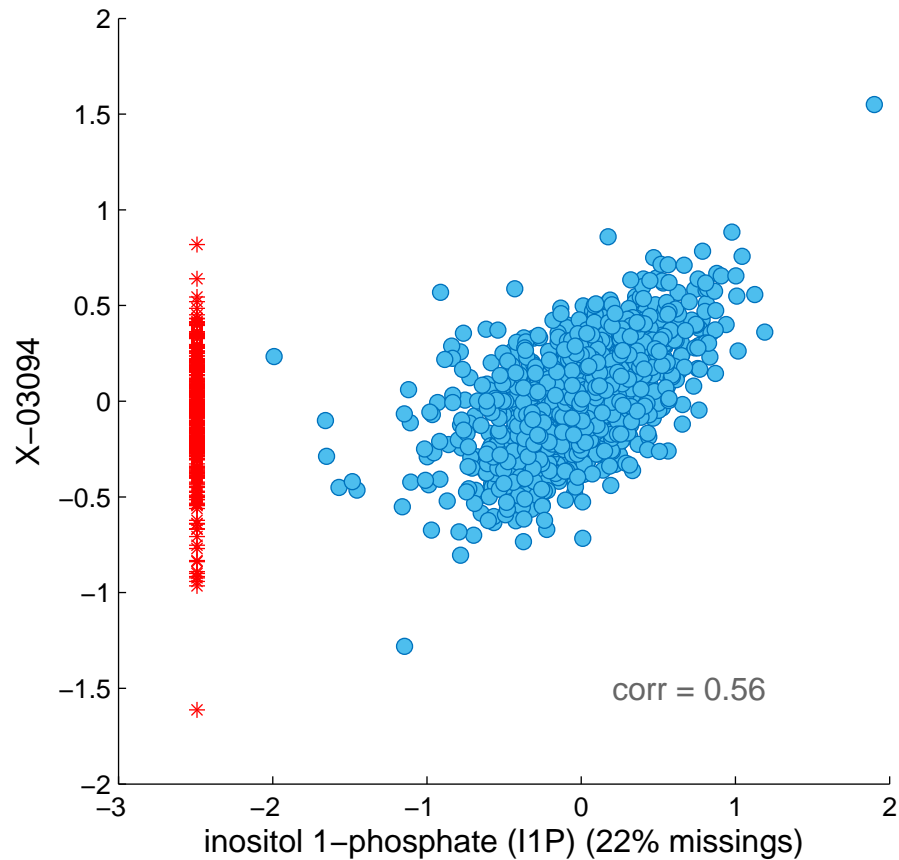

Concentrations of X-03094 in  
missing and observed inositol 1-phosphate (I1P)

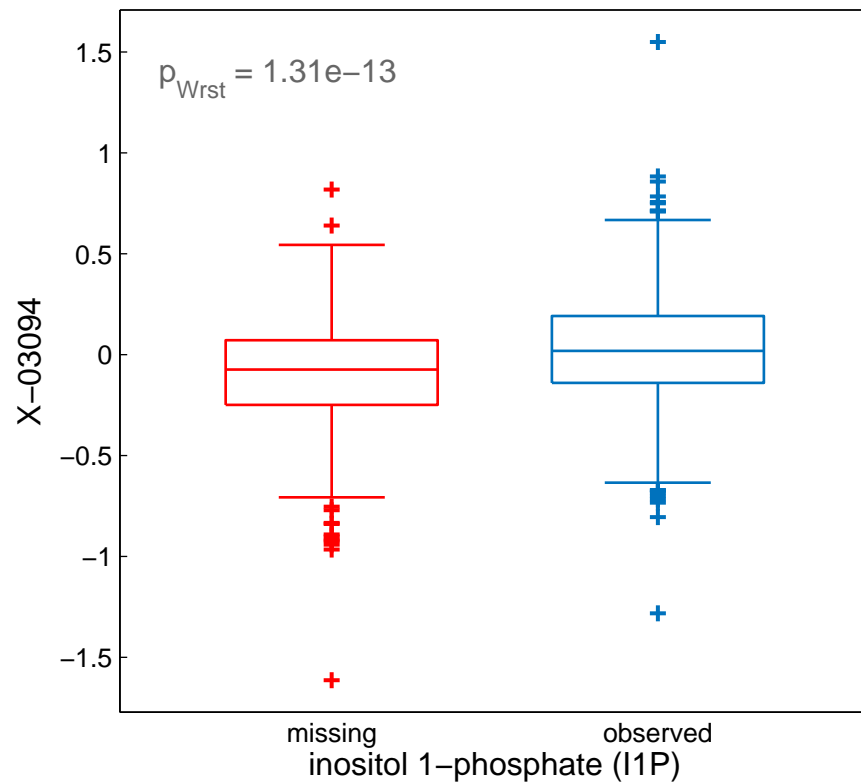

Missing values of 1-palmitoylglycerol (1-monopalmitin) in 1-stearoylglycerol (1-monostearin)

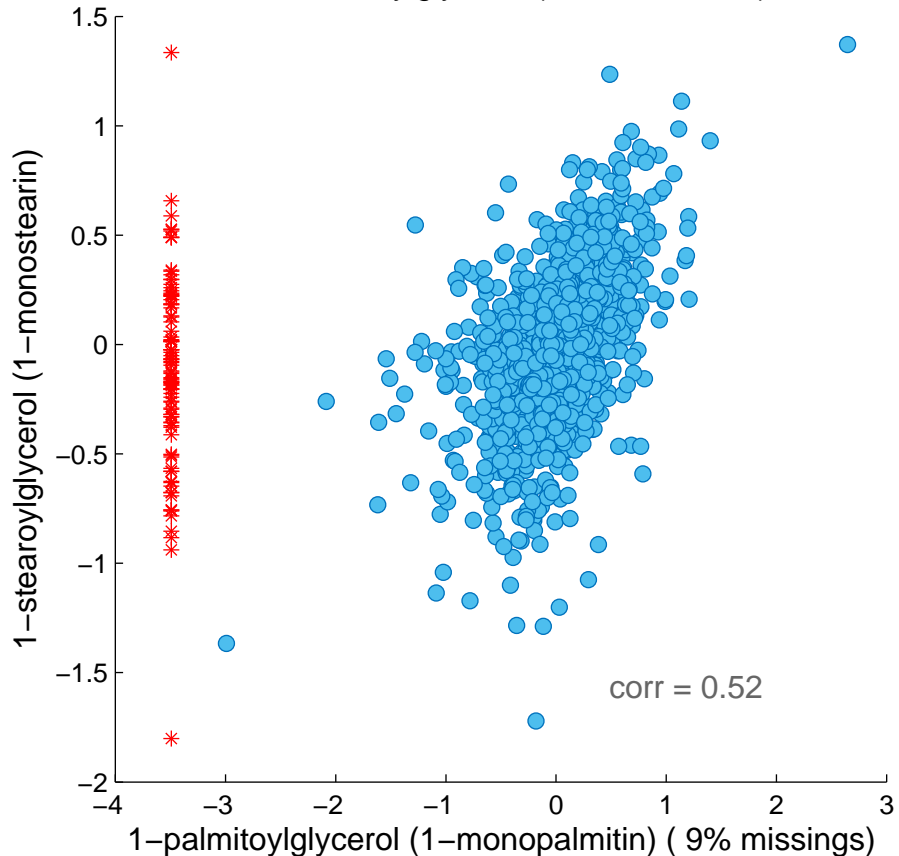

Concentrations of 1-stearoylglycerol (1-monostearin) in missing and observed 1-palmitoylglycerol (1-monopalmitin)

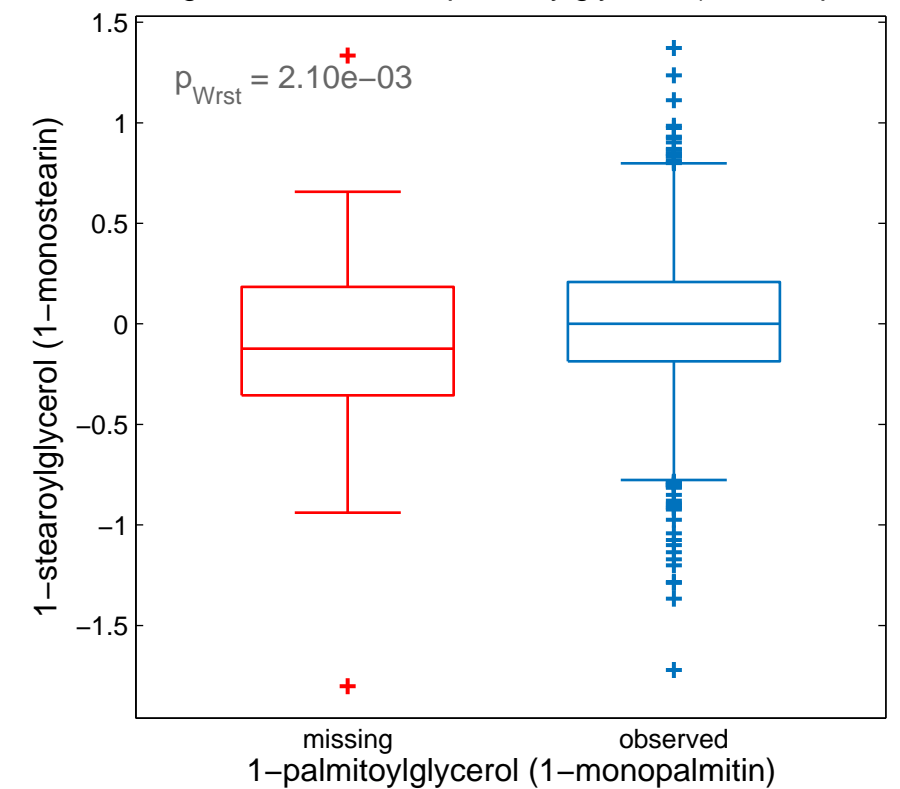

Missing values of isovalerate  
in isovalerylcarnitine

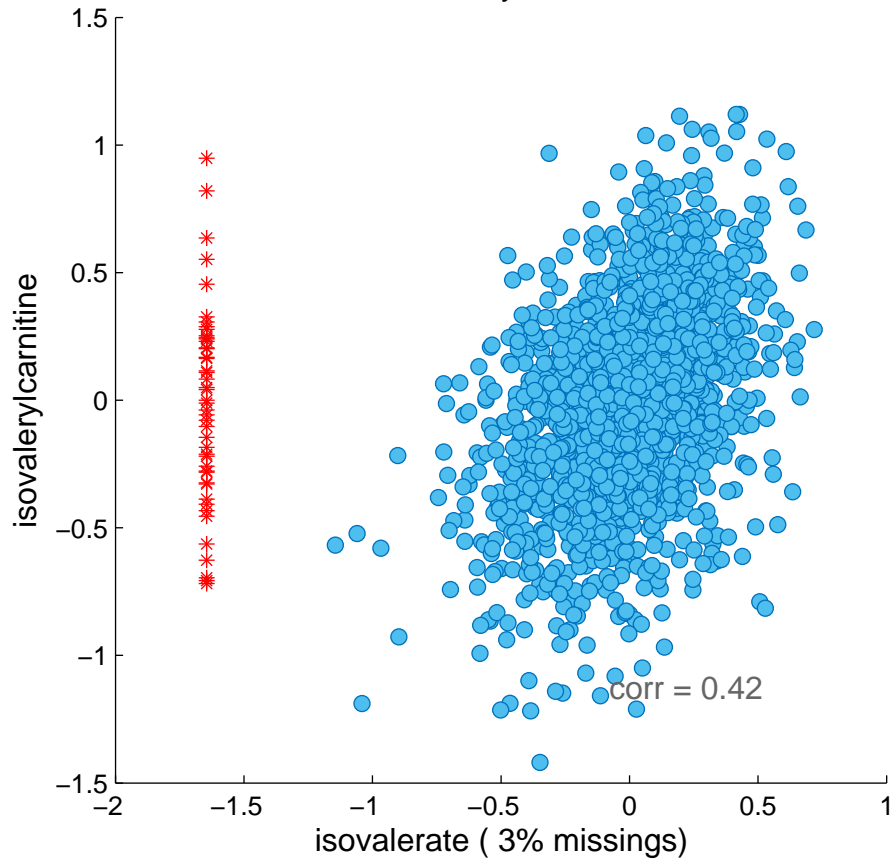

Concentrations of isovalerylcarnitine in  
missing and observed isovalerate

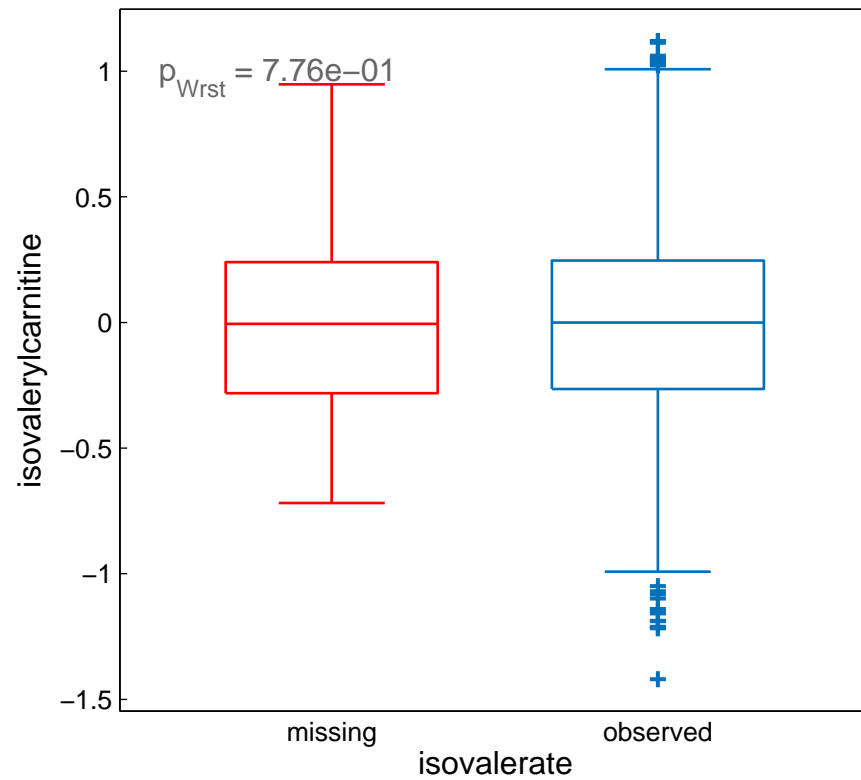

Missing values of isovaleryl carnitine  
in 2-methylbutyrylcarnitine

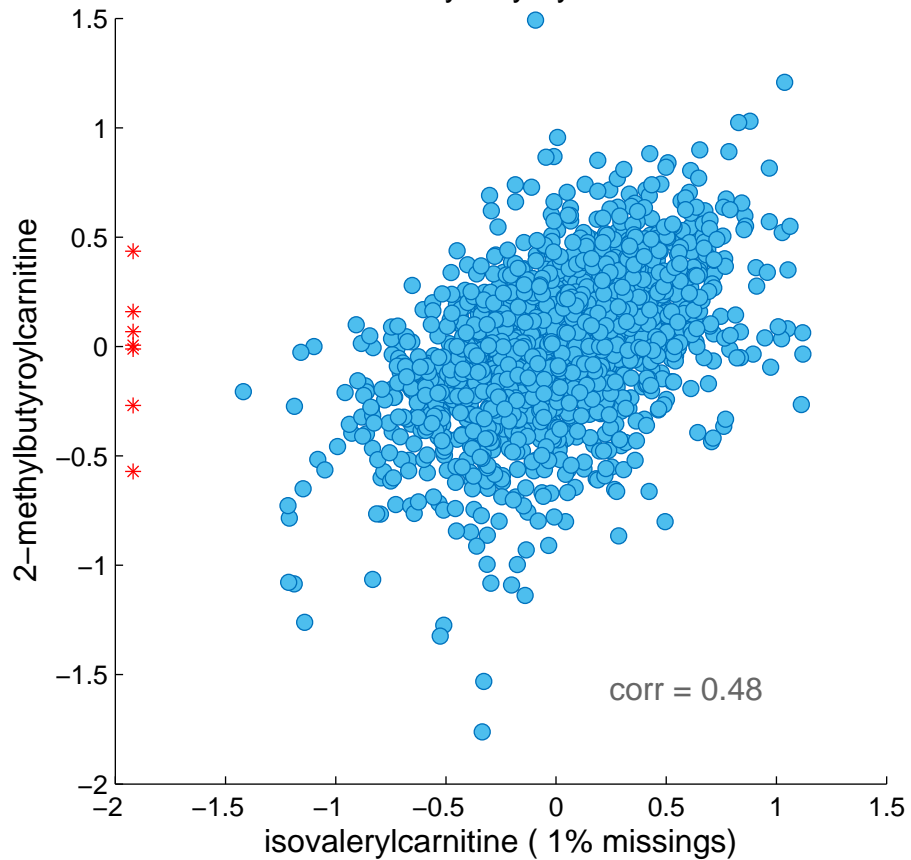

Concentrations of 2-methylbutyrylcarnitine in  
missing and observed isovaleryl carnitine

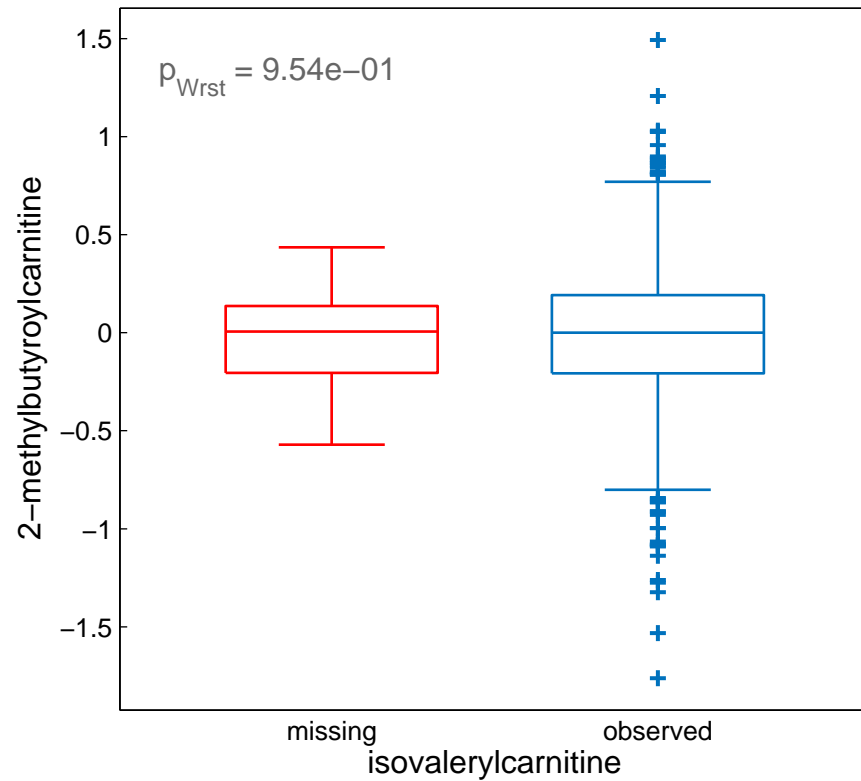



Missing values of laurylcarnitine  
in 2-tetradecenoyl carnitine

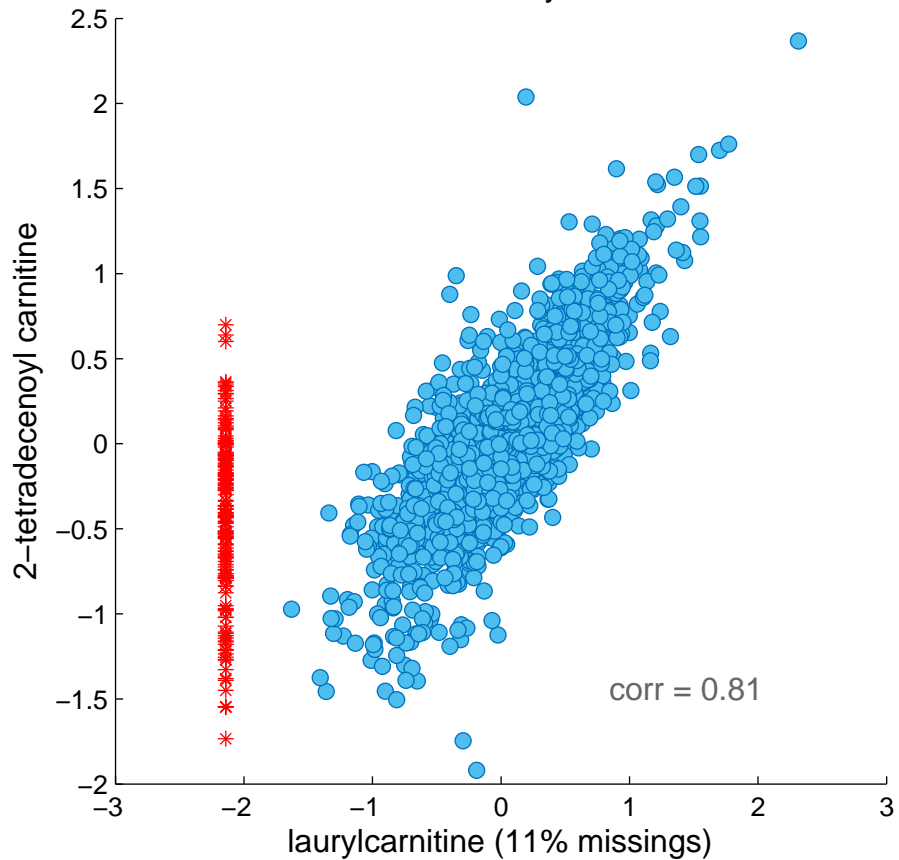

Concentrations of 2-tetradecenoyl carnitine in  
missing and observed laurylcarnitine

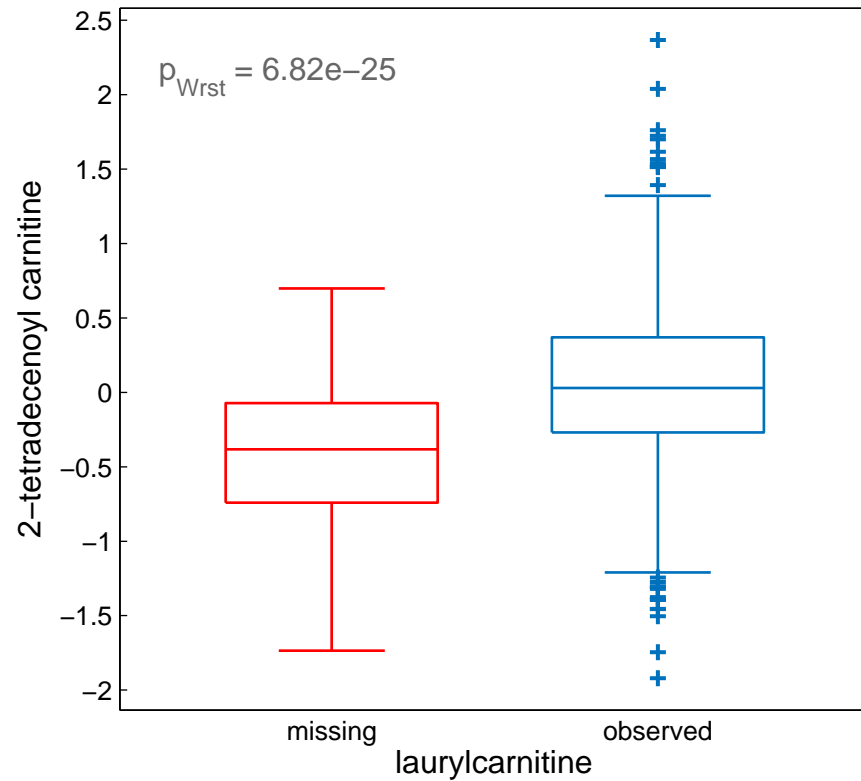

Missing values of malate  
in citrate

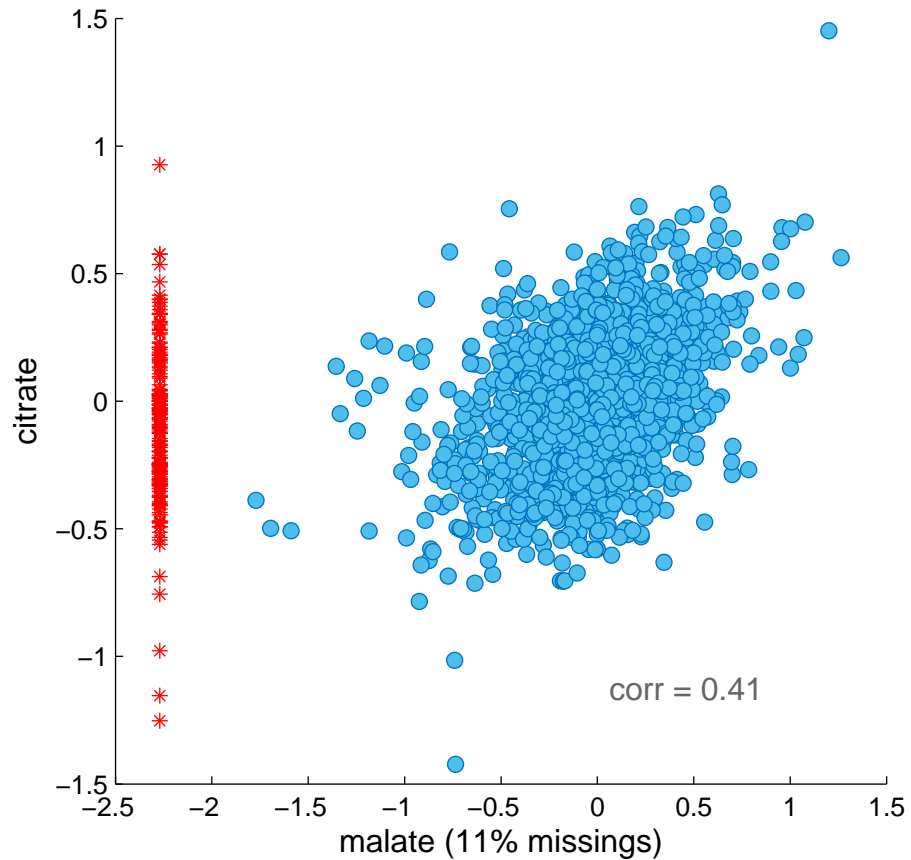

Concentrations of citrate in  
missing and observed malate

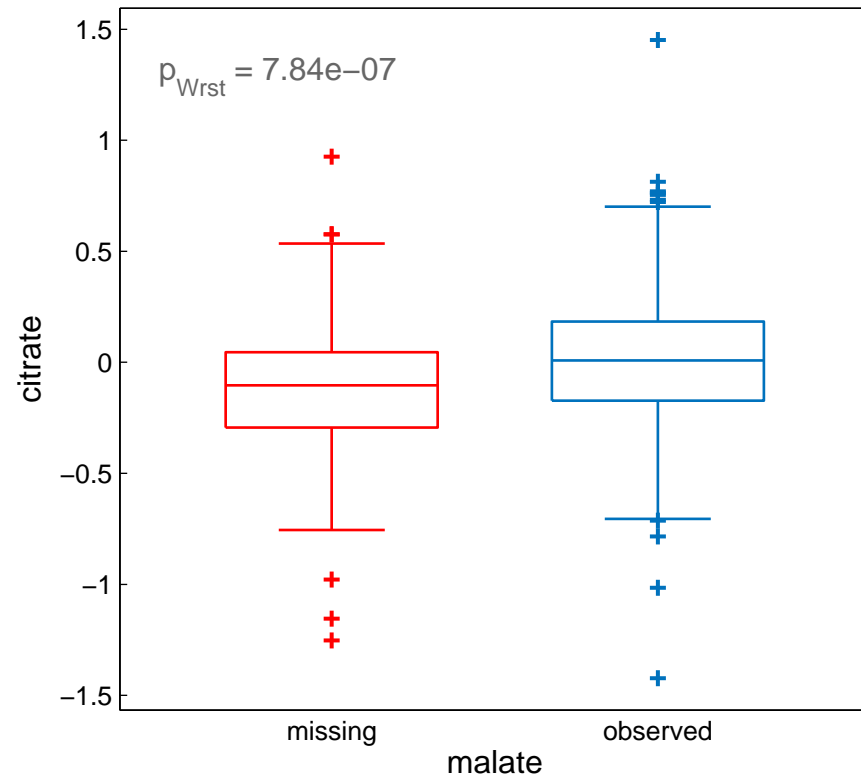

Missing values of mannitol  
in C-glycosyltryptophan

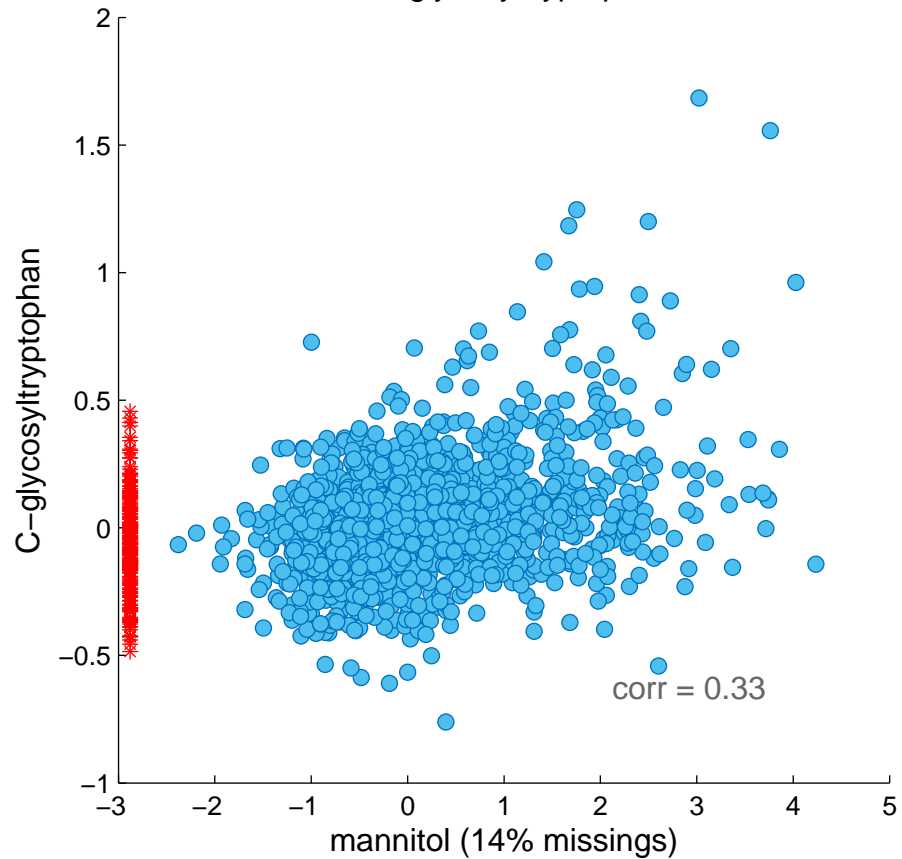

Concentrations of C-glycosyltryptophan in  
missing and observed mannitol

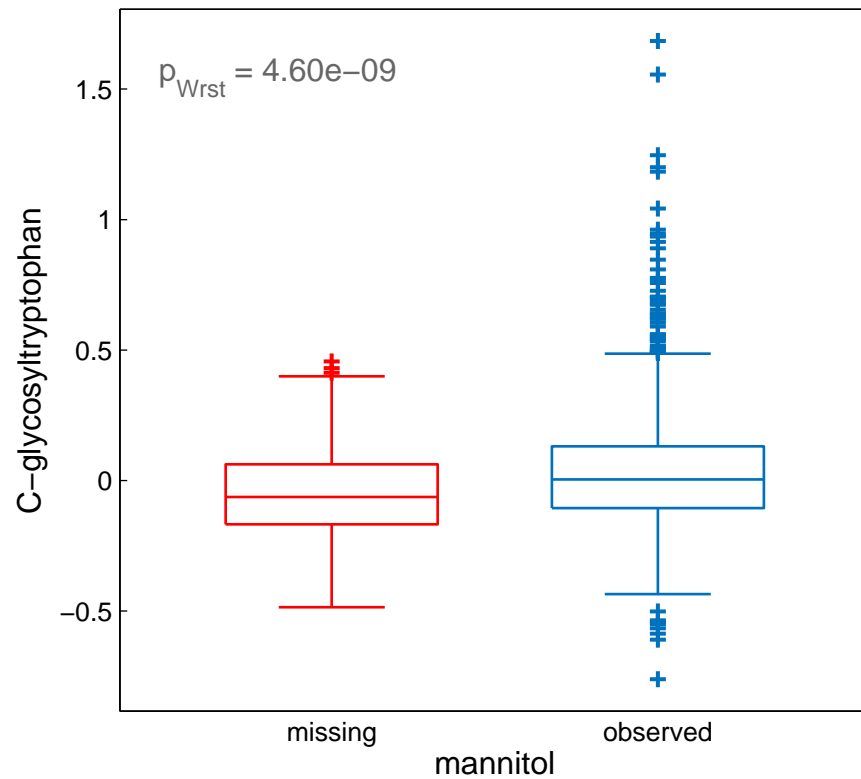

Missing values of 1-palmitoylglycerophosphoethanolamine in 1-oleoylglycerophosphoethanolamine

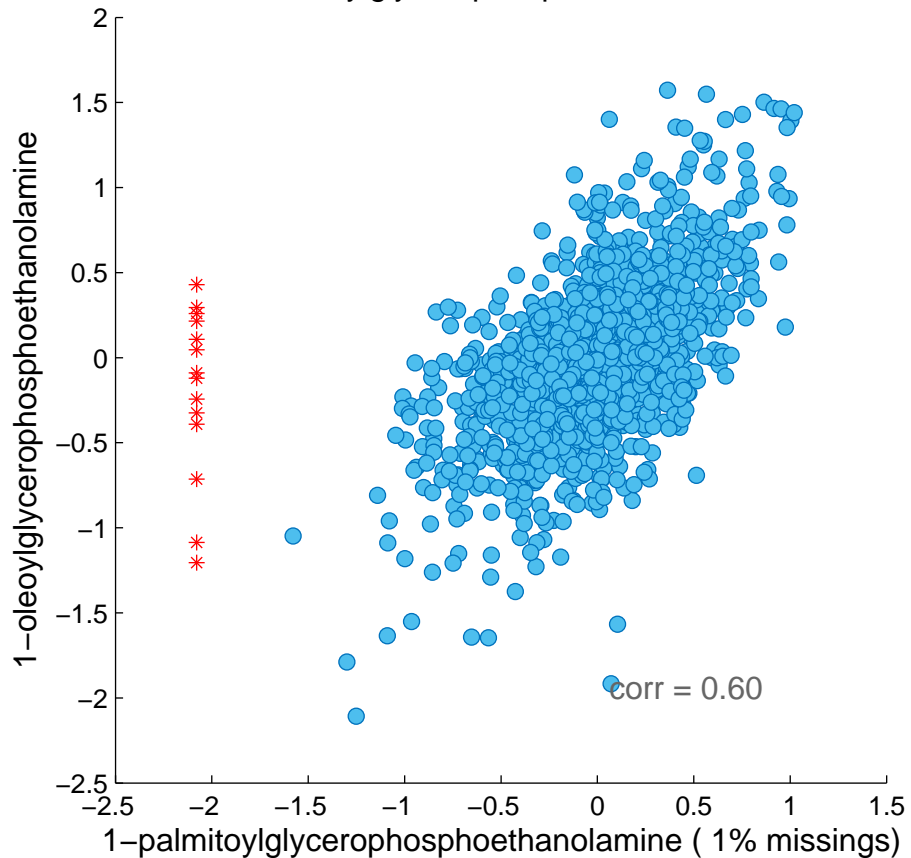

Concentrations of 1-oleoylglycerophosphoethanolamine in missing and observed 1-palmitoylglycerophosphoethanolamine

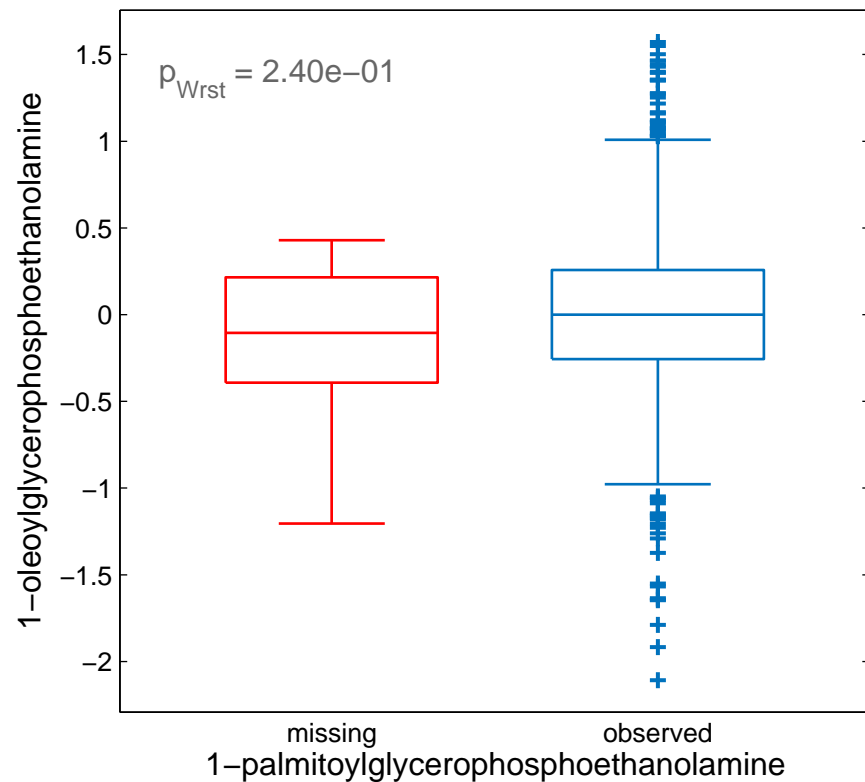

Missing values of N-(2-furoyl)glycine  
in X-12039

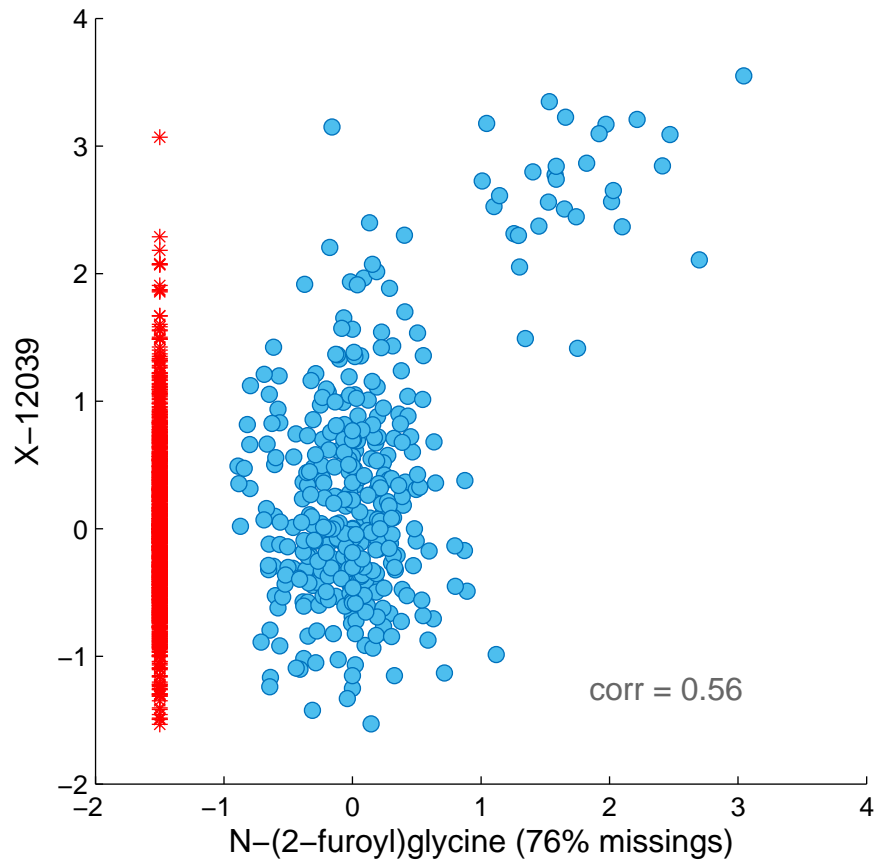

Concentrations of X-12039 in  
missing and observed N-(2-furoyl)glycine

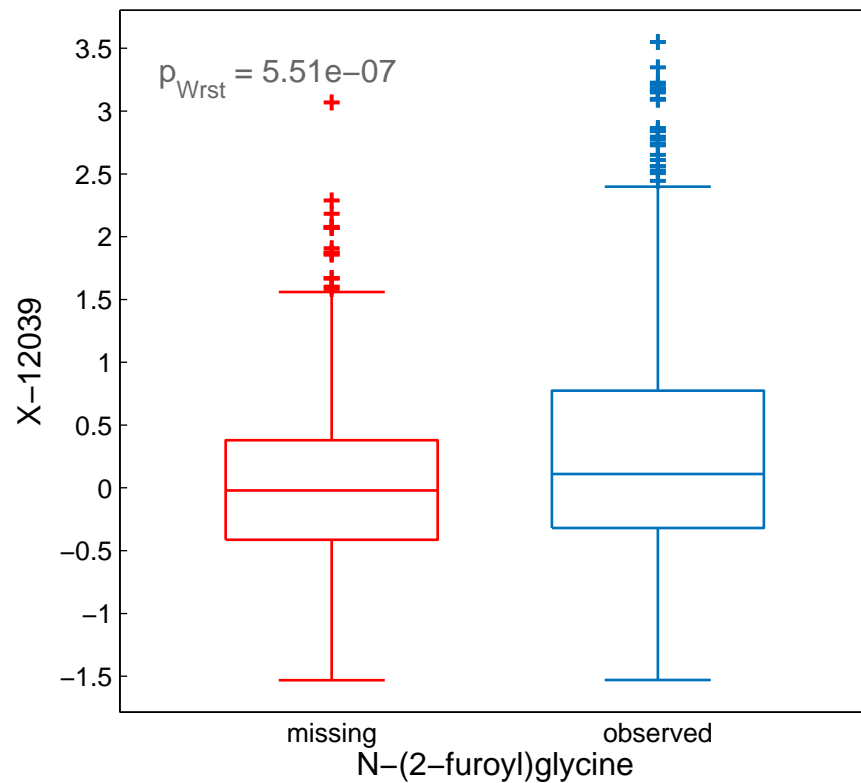

Missing values of N-acetylalanine  
in C-glycosyltryptophan

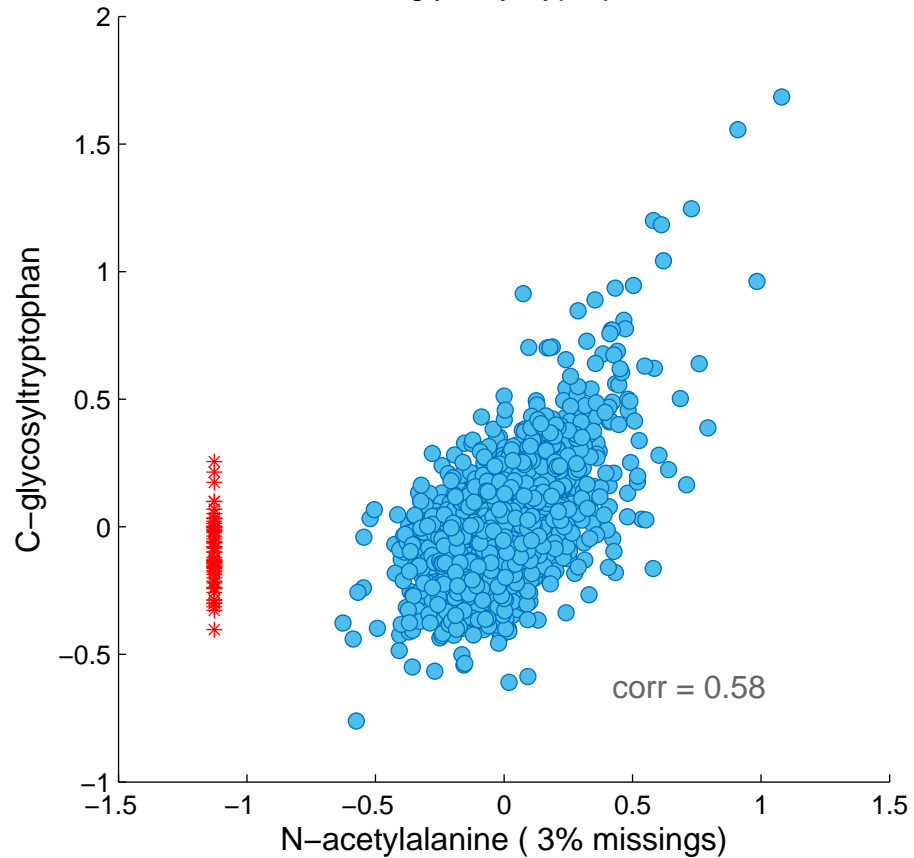

Concentrations of C-glycosyltryptophan in  
missing and observed N-acetylalanine

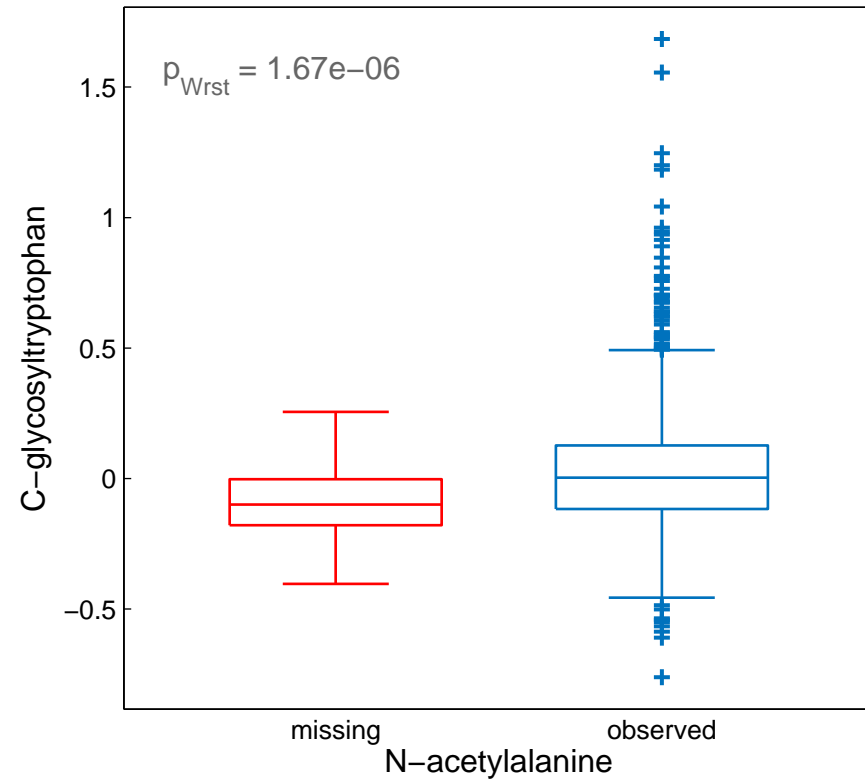

Missing values of N-acetylglycine  
in 3-hydroxybutyrate (BHBA)

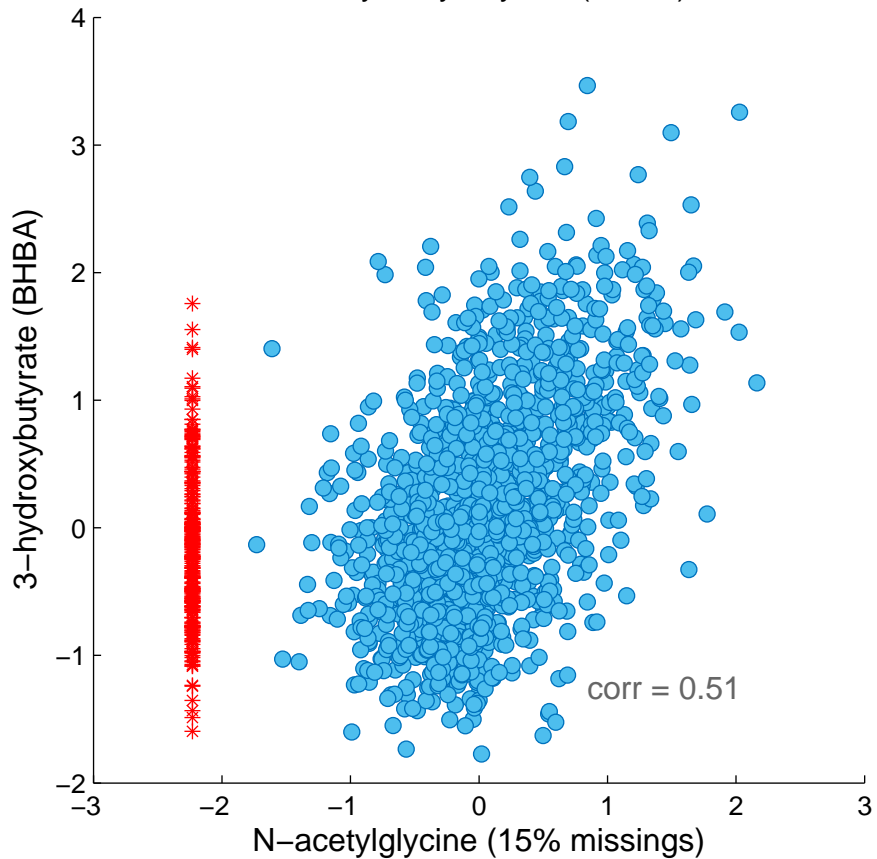

Concentrations of 3-hydroxybutyrate (BHBA) in  
missing and observed N-acetylglycine

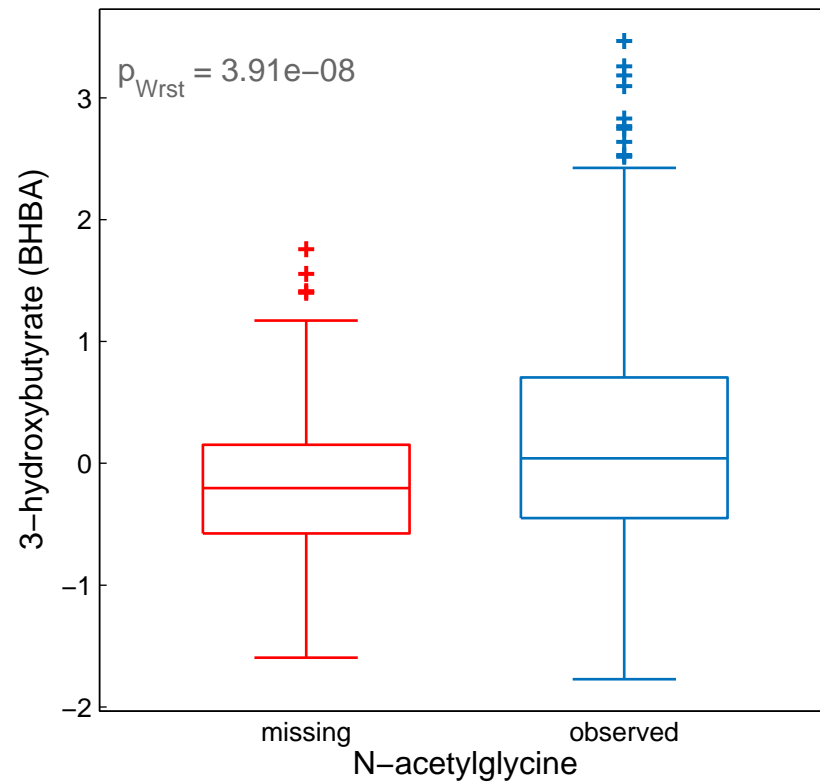

Missing values of N-acetylnithine  
in X-11787

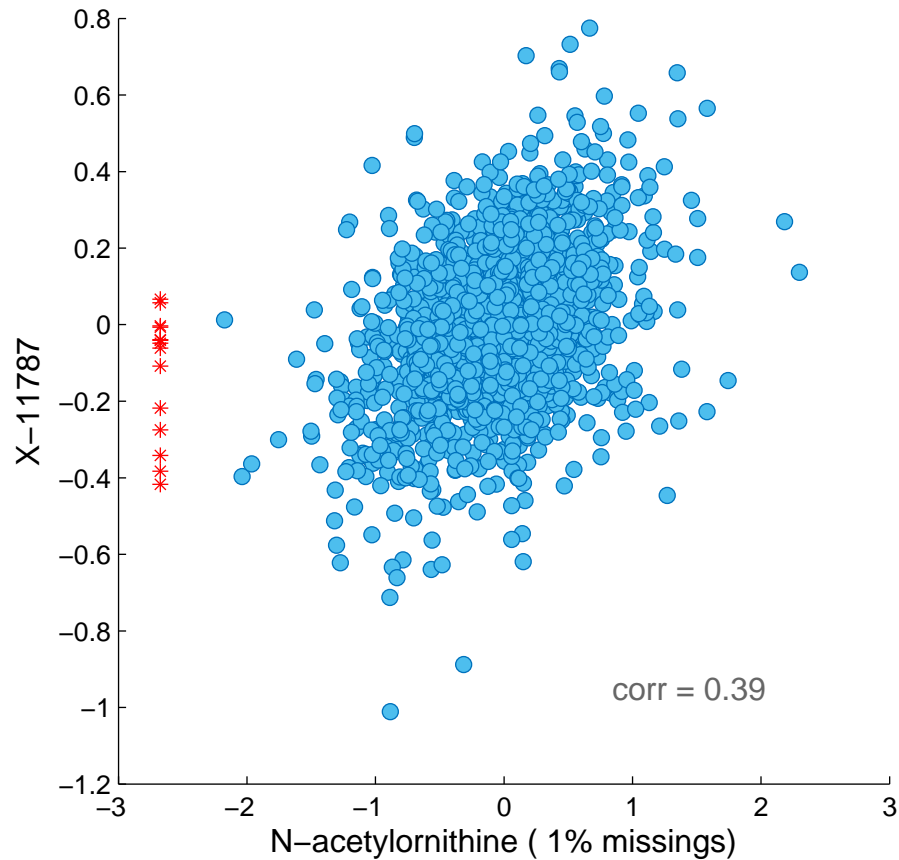

Concentrations of X-11787 in  
missing and observed N-acetylnithine

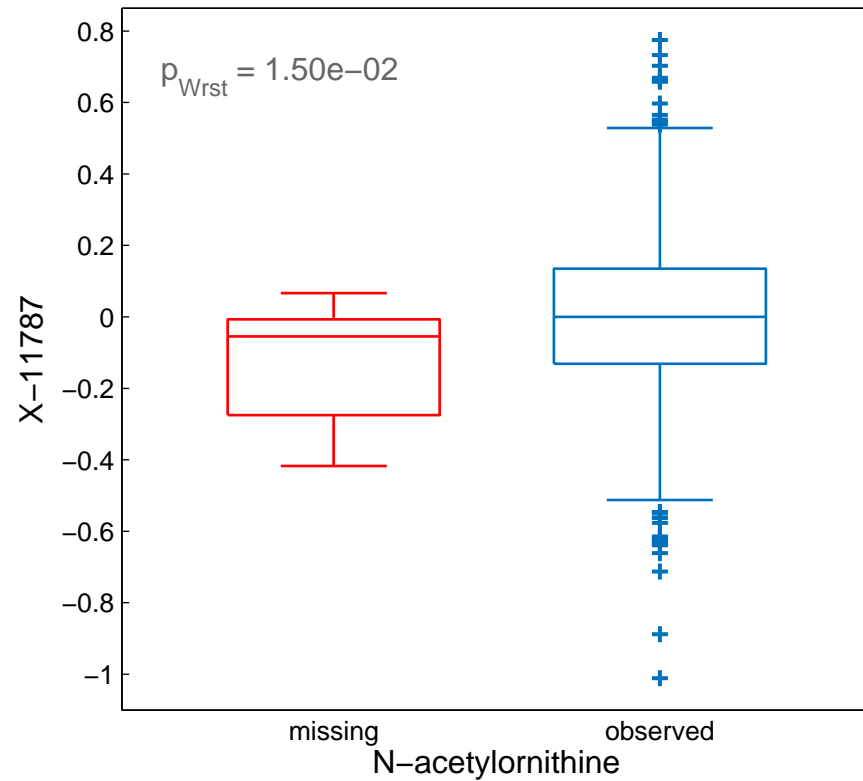



Missing values of N-acetylthreonine  
in C-glycosyltryptophan

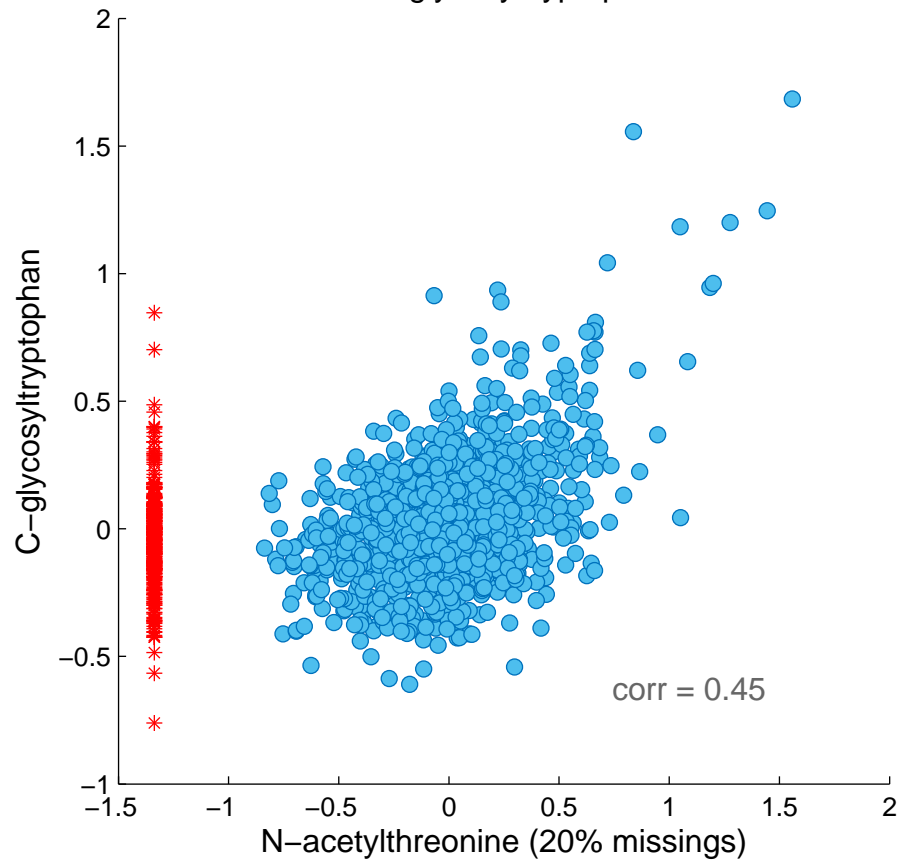

Concentrations of C-glycosyltryptophan in  
missing and observed N-acetylthreonine

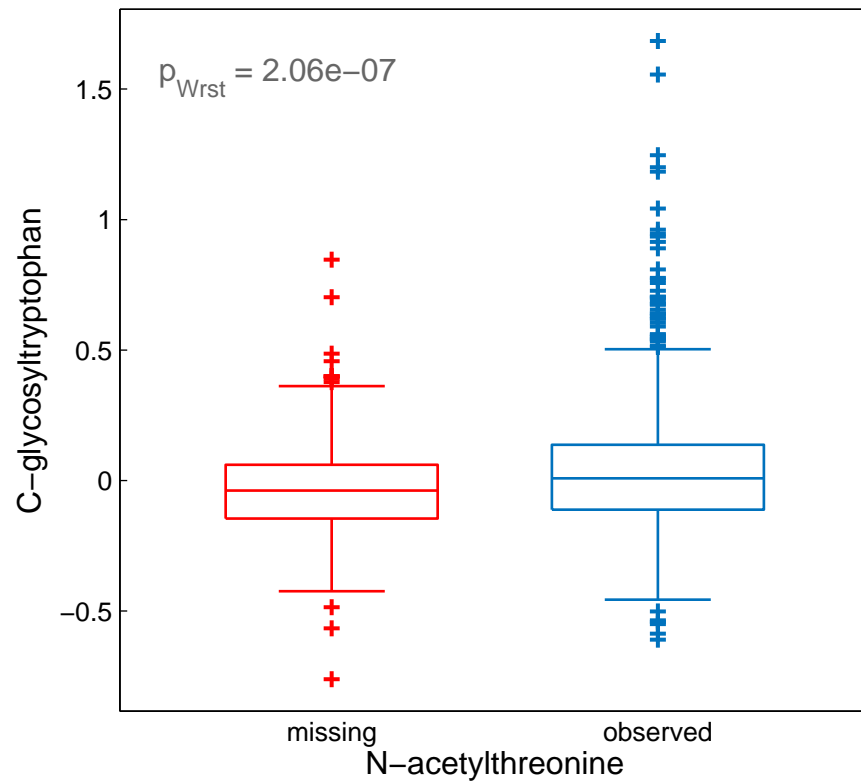

Missing values of N2,N2-dimethylguanosine  
in theobromine

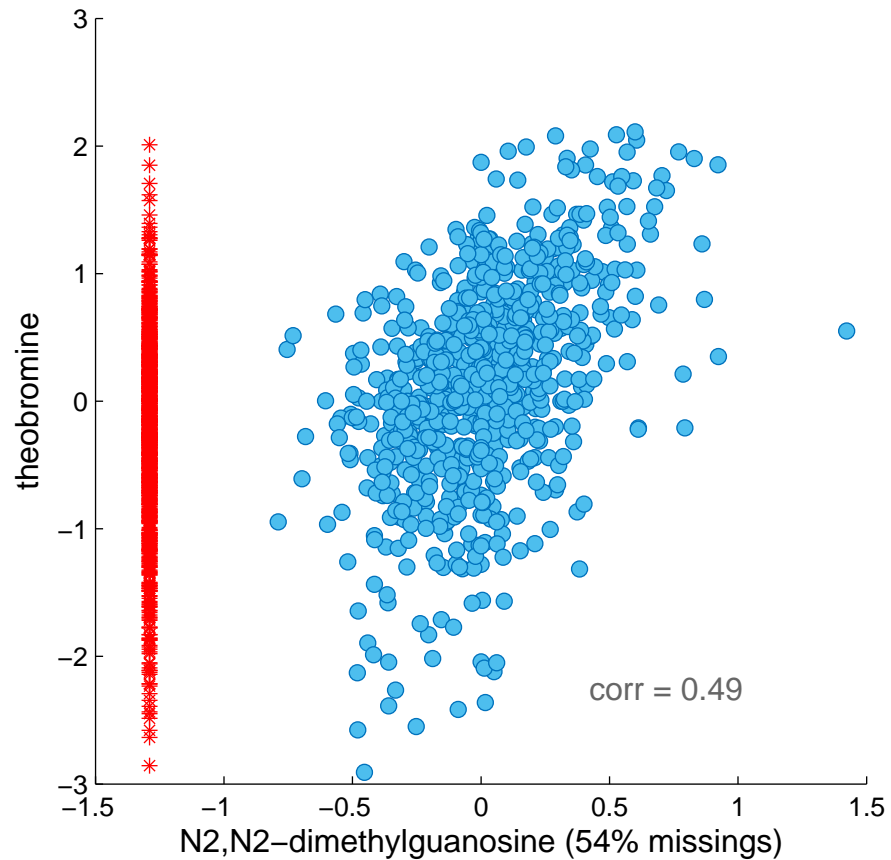

Concentrations of theobromine in  
missing and observed N2,N2-dimethylguanosine

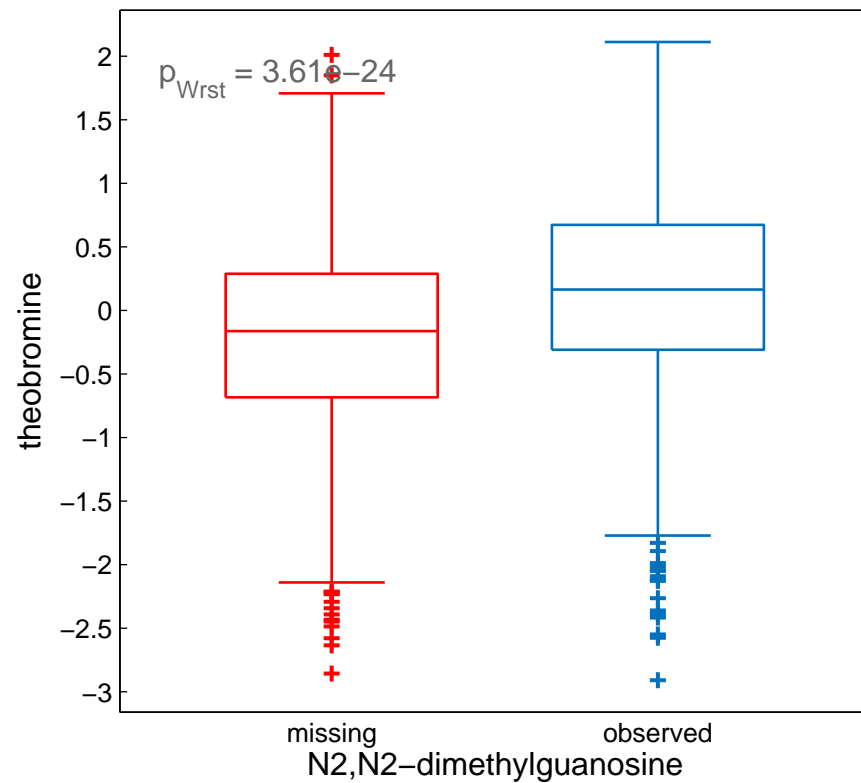

Missing values of 1-palmitoylglycerophosphoinositol  
in 1-stearoylglycerophosphoinositol

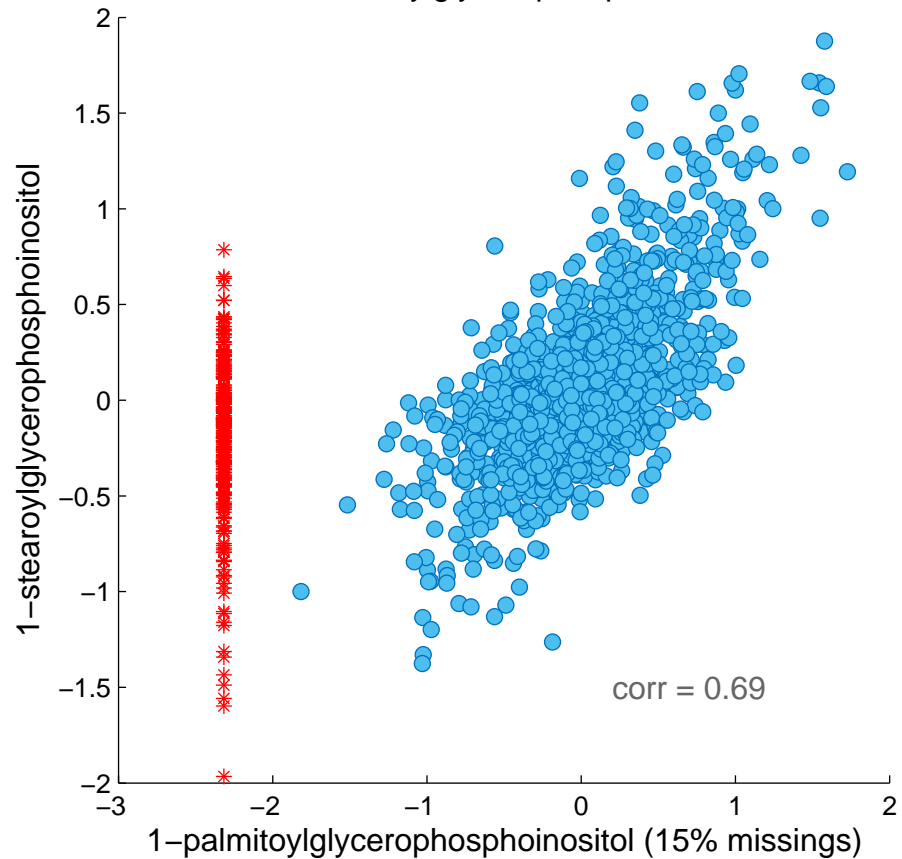

Concentrations of 1-stearoylglycerophosphoinositol in  
missing and observed 1-palmitoylglycerophosphoinositol

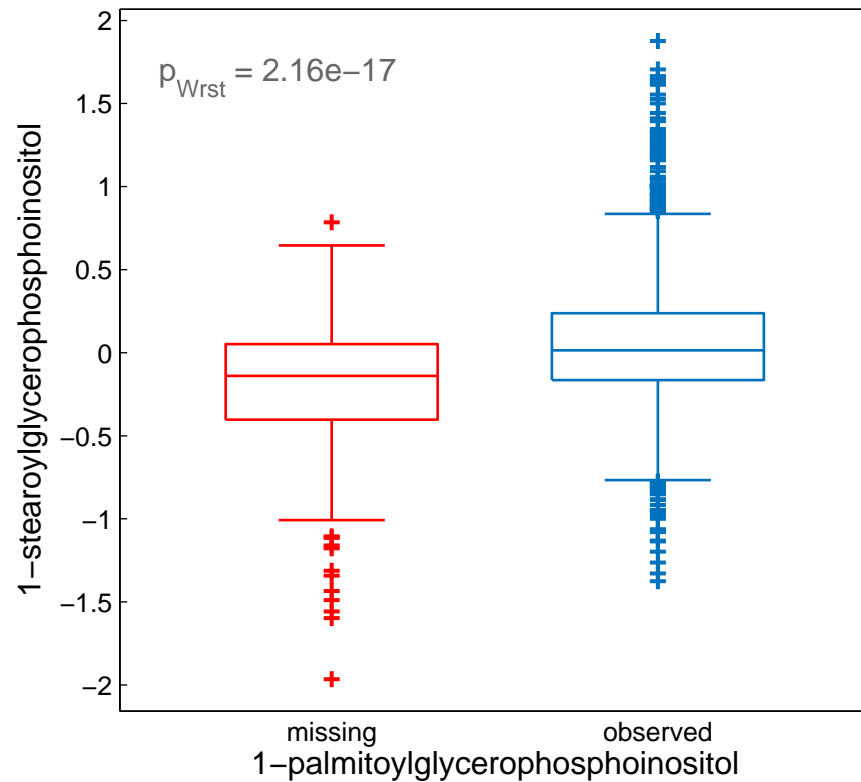

Missing values of nonadecanoate (19:0)  
in margarate (17:0)

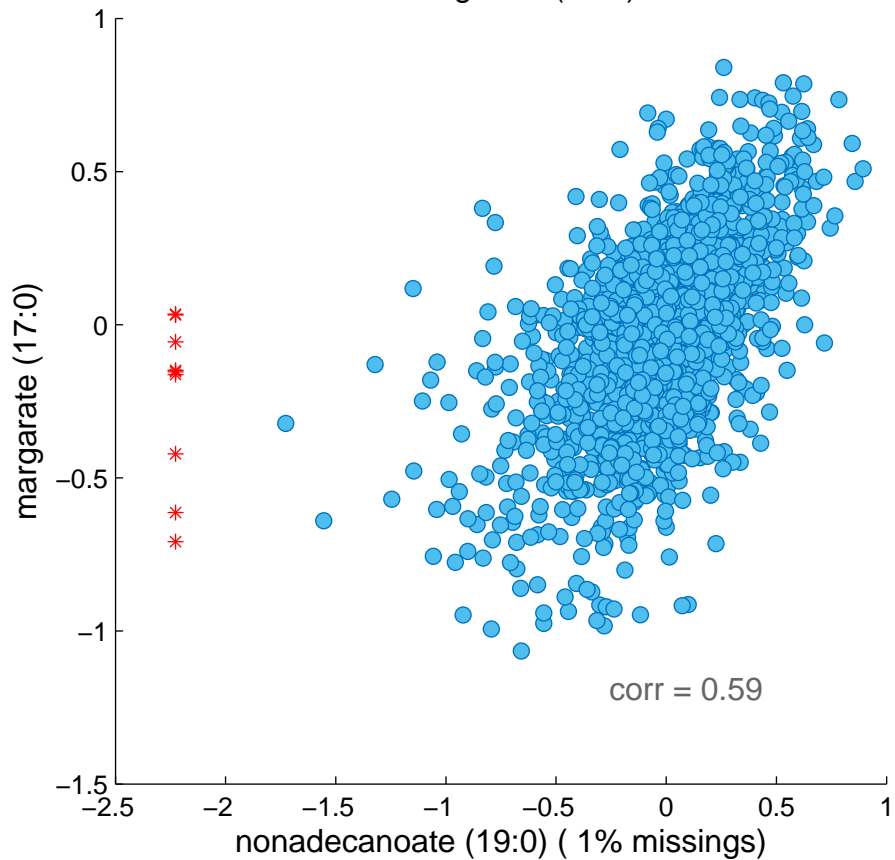

Concentrations of margarate (17:0) in  
missing and observed nonadecanoate (19:0)

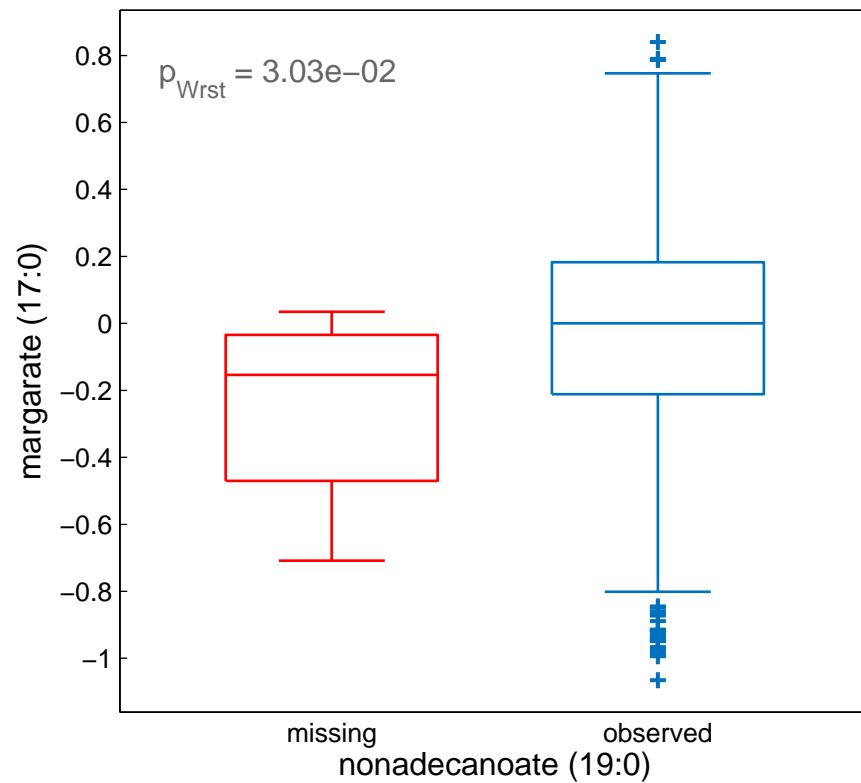

Missing values of octadecanedioate  
in X-11538

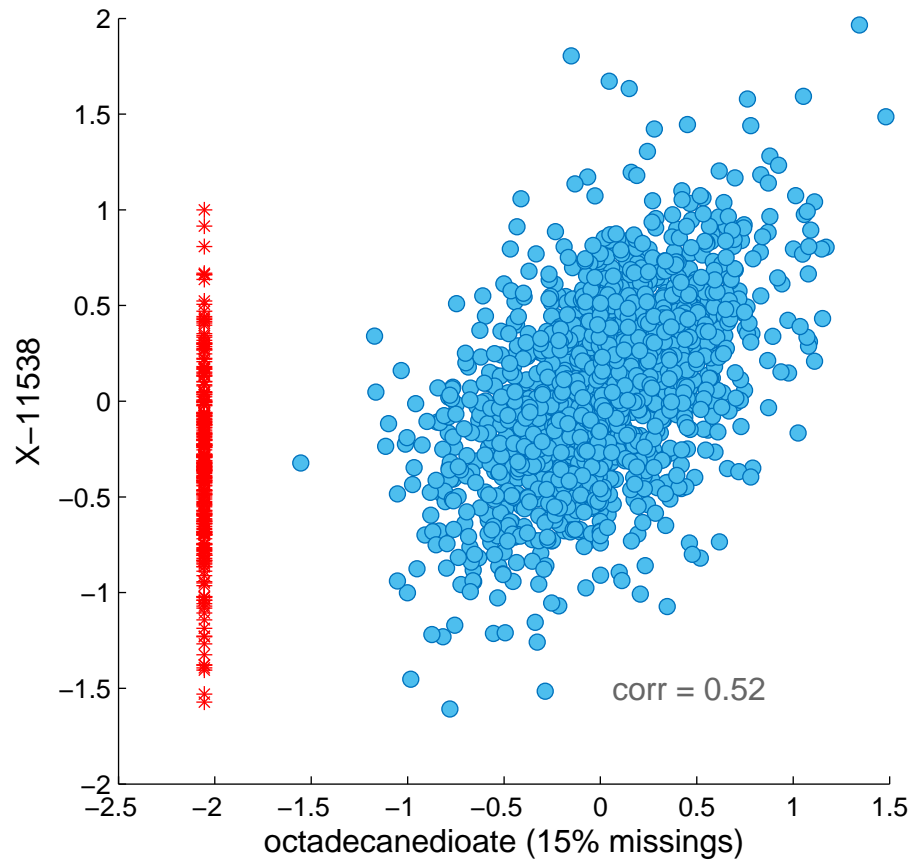

Concentrations of X-11538 in  
missing and observed octadecanedioate

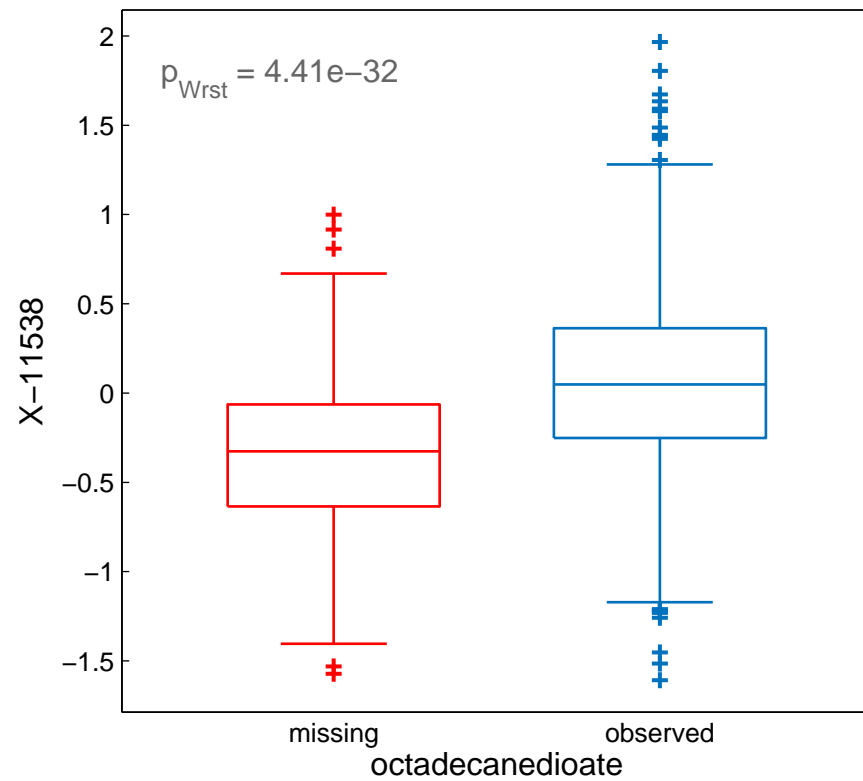

Missing values of oleoylcarnitine  
in 2-tetradecenoyl carnitine

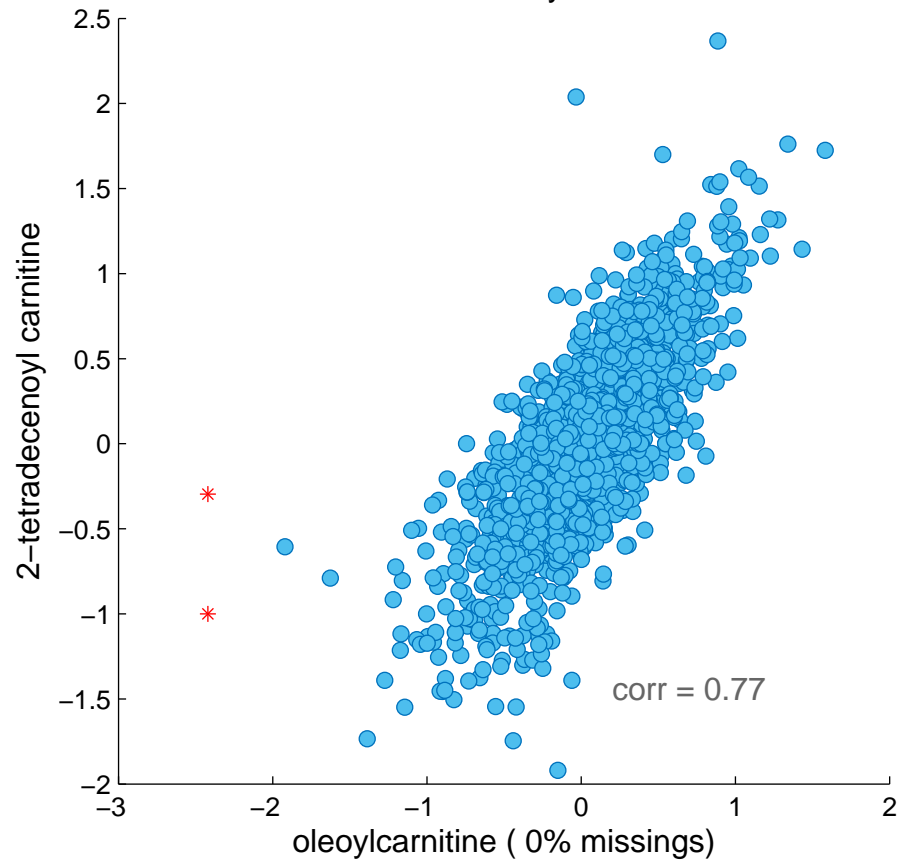

Concentrations of 2-tetradecenoyl carnitine in  
missing and observed oleoylcarnitine

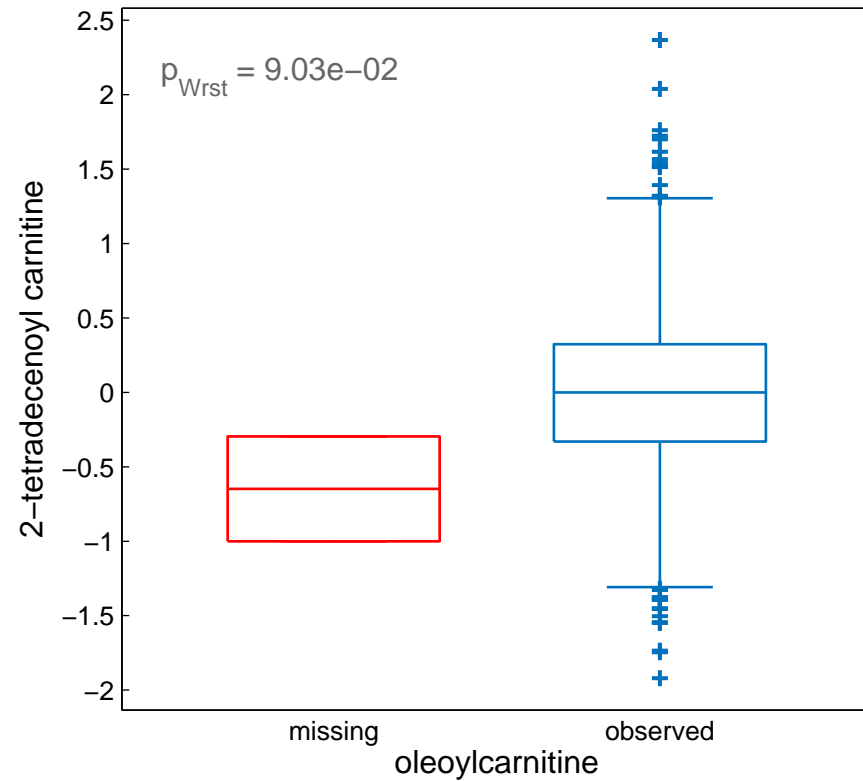

Missing values of 1-stearoylglycerol (1-monostearin)  
in 1-palmitoylglycerol (1-monopalmitin)

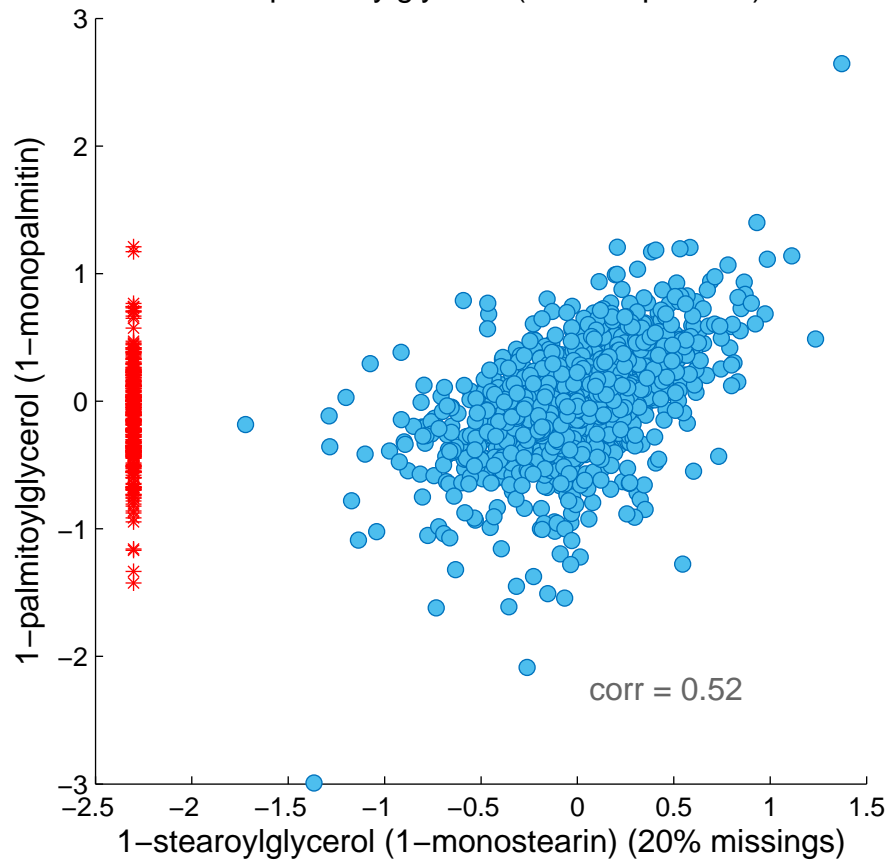

Concentrations of 1-palmitoylglycerol (1-monopalmitin) in  
missing and observed 1-stearoylglycerol (1-monostearin)

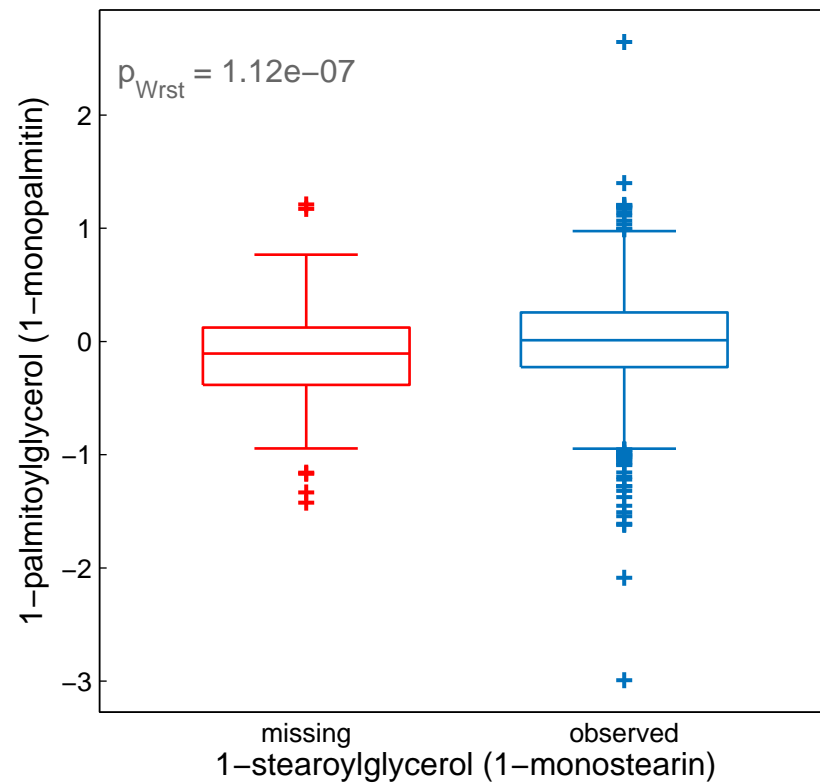

Missing values of palmitoylcarnitine  
in oleoylcarnitine

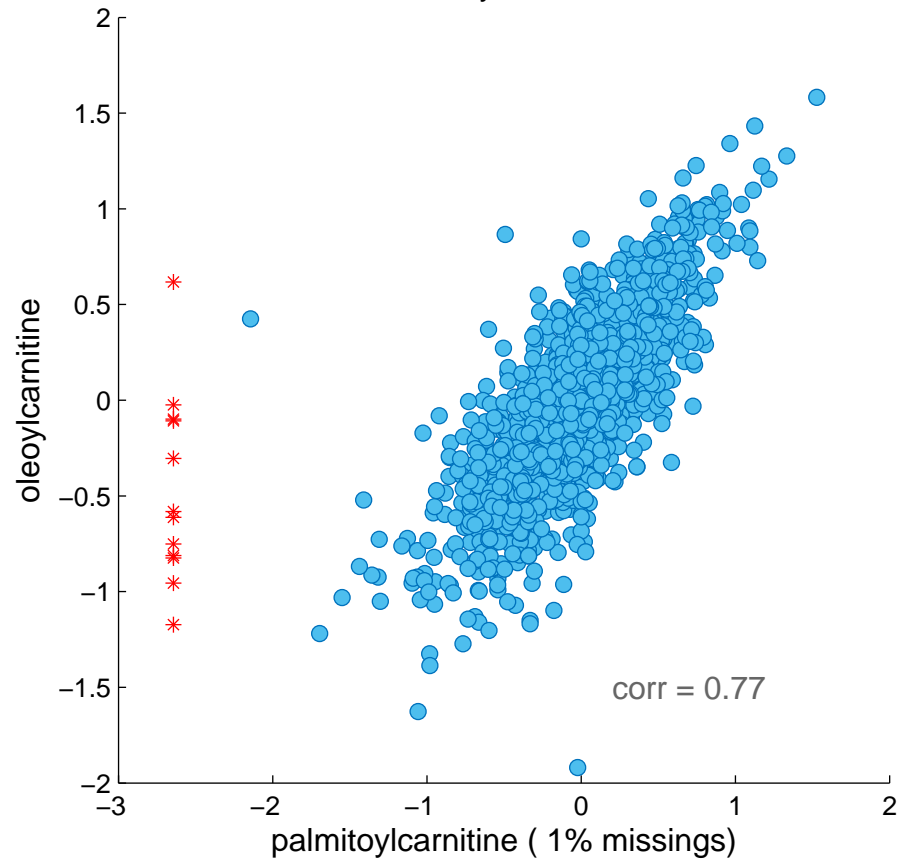

Concentrations of oleoylcarnitine in  
missing and observed palmitoylcarnitine

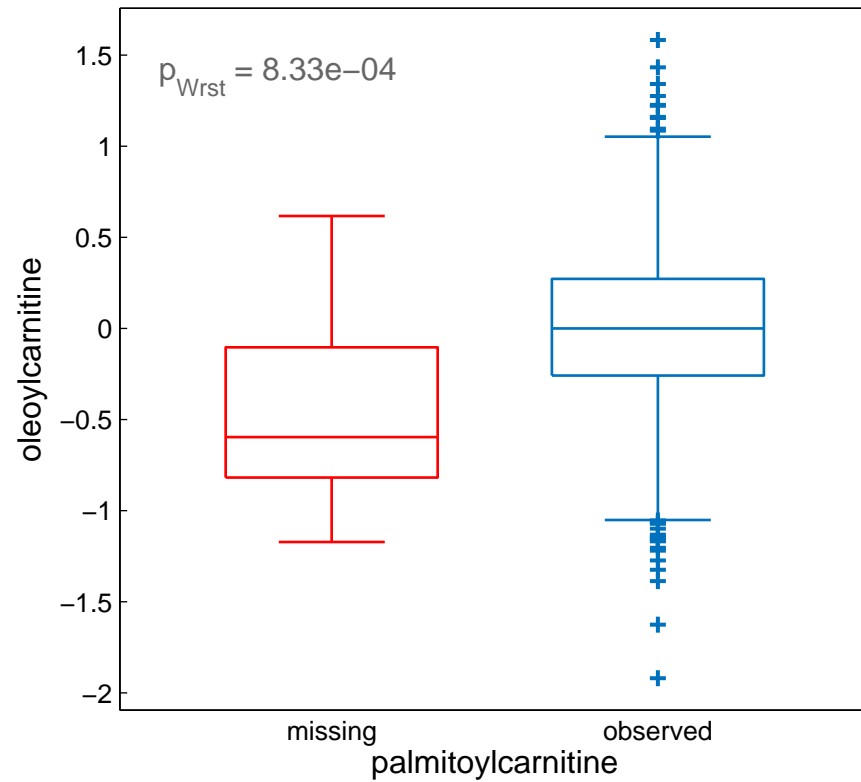



Missing values of pantothenate  
in pyridoxate

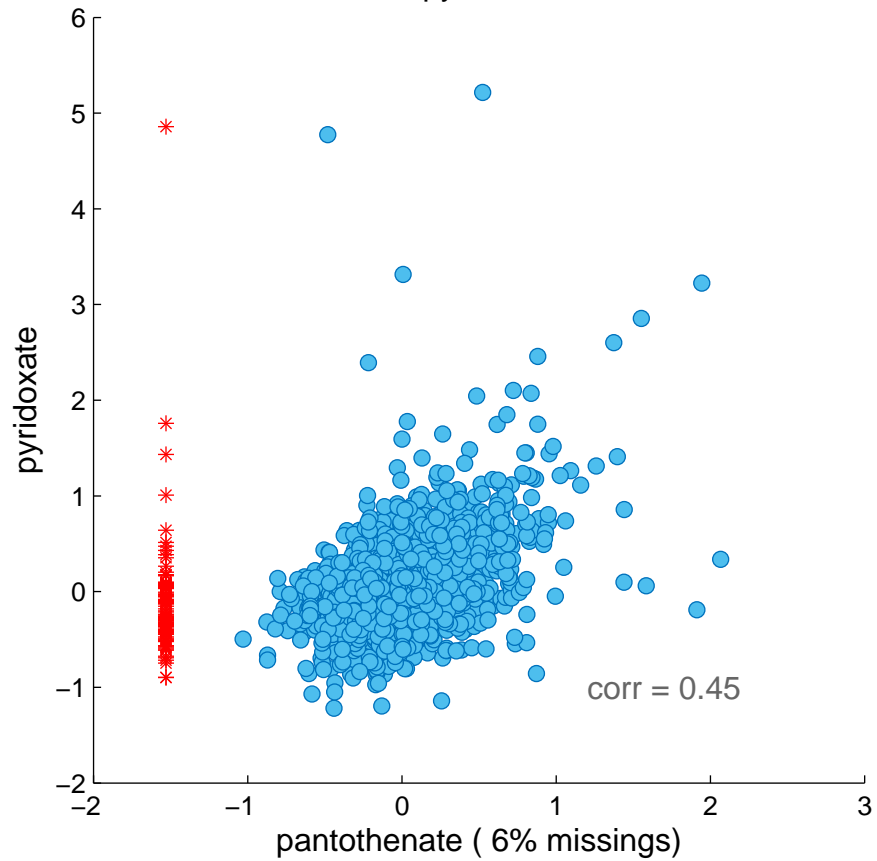

Concentrations of pyridoxate in  
missing and observed pantothenate

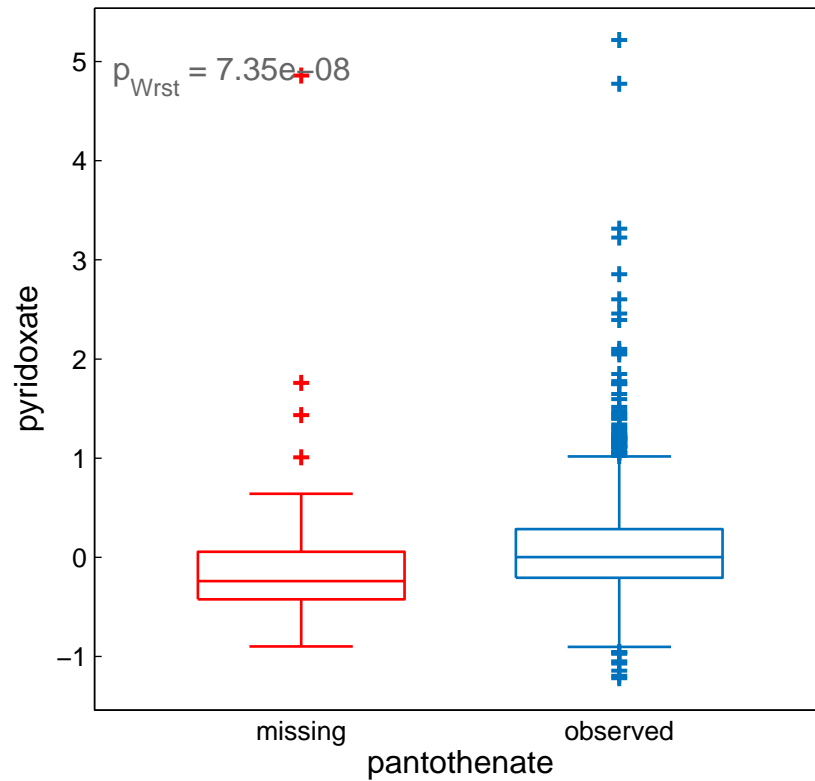

Missing values of paraxanthine  
in caffeine

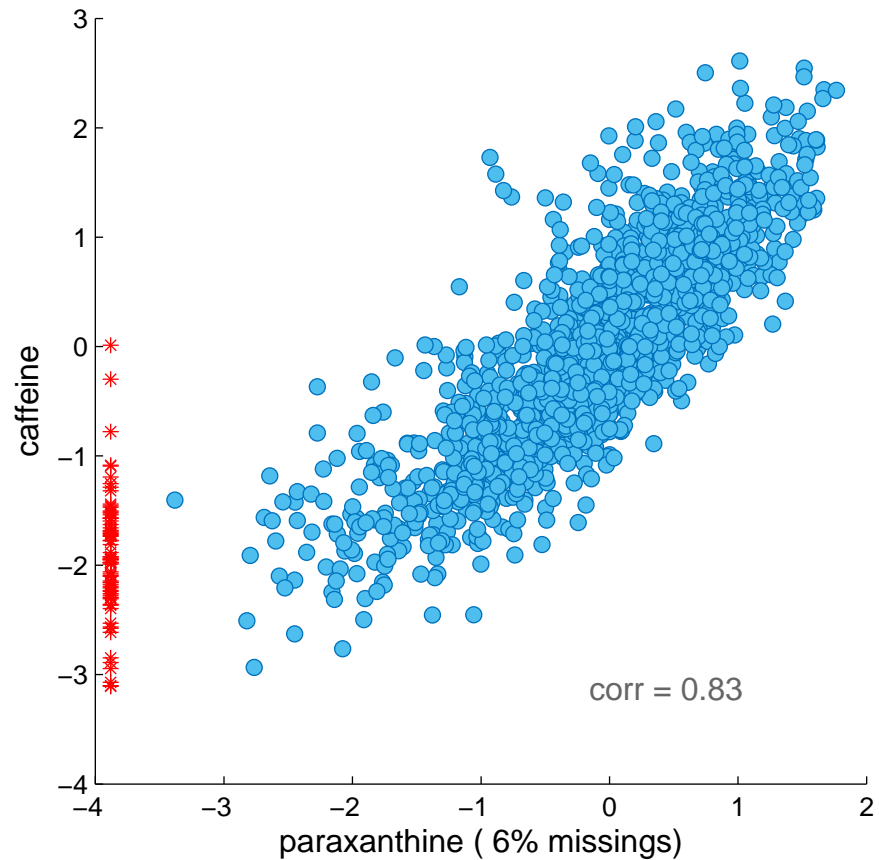

Concentrations of caffeine in  
missing and observed paraxanthine

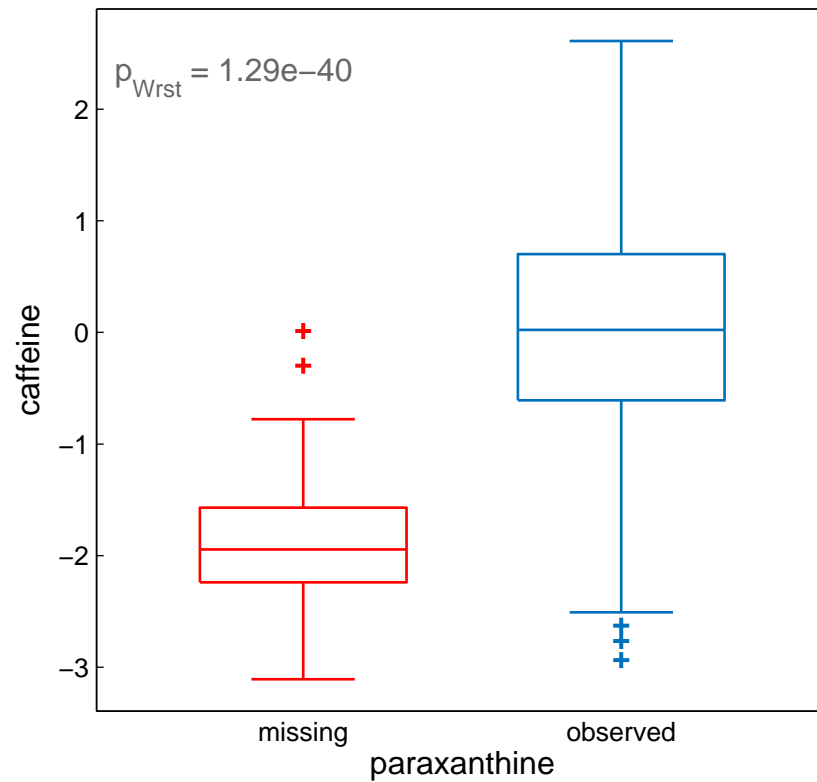

Missing values of pentadecanoate (15:0)  
in myristate (14:0)

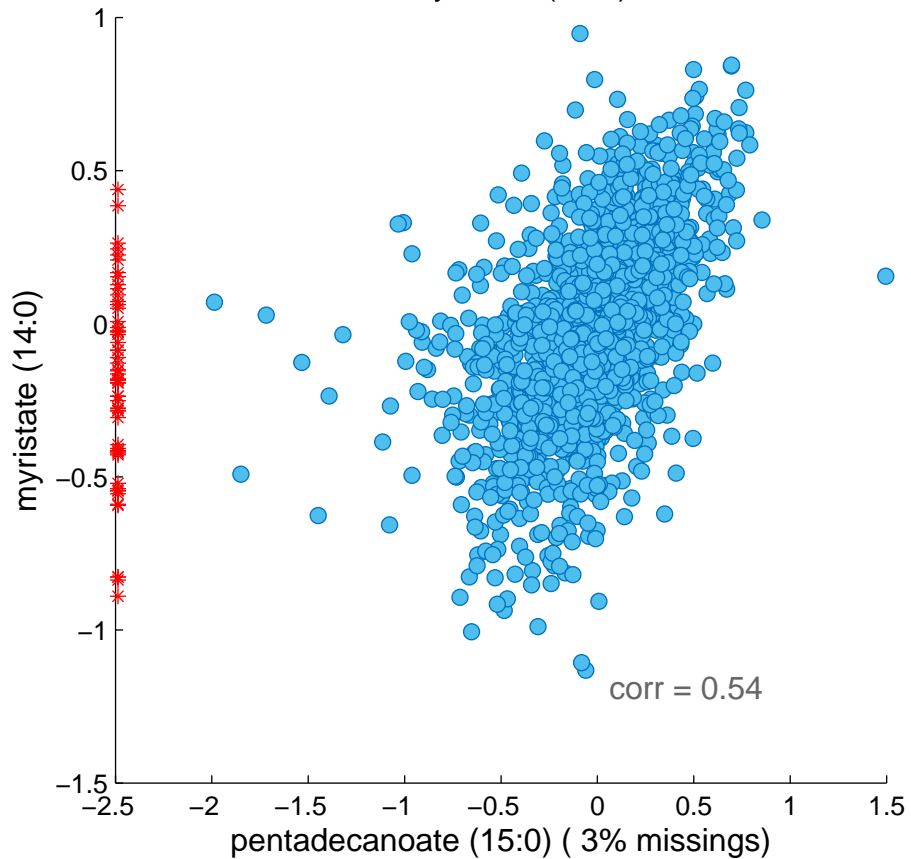

Concentrations of myristate (14:0) in  
missing and observed pentadecanoate (15:0)

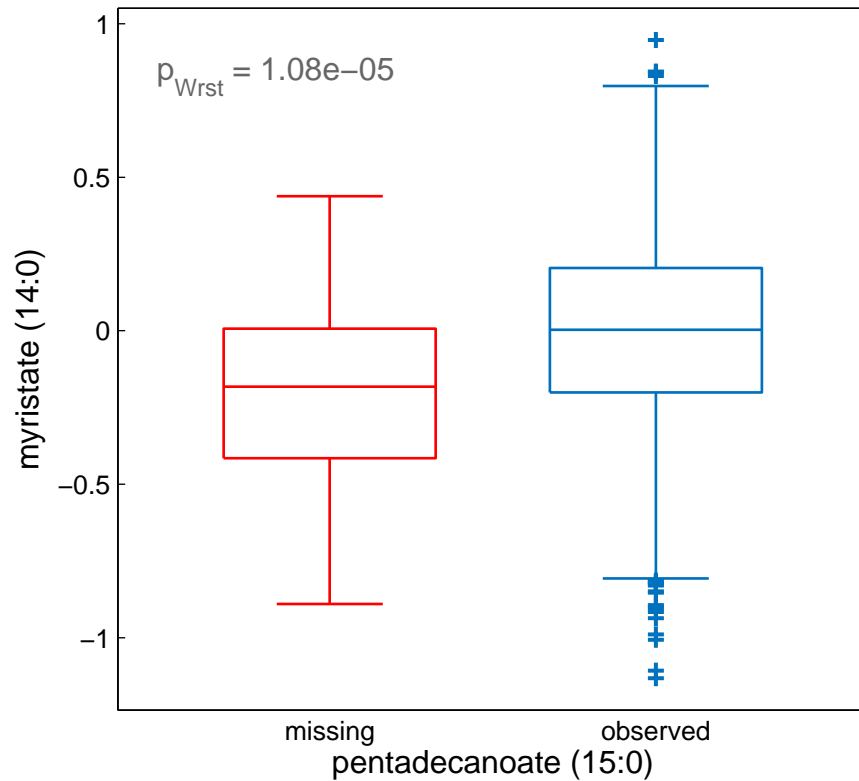

Missing values of phenylacetate in phenylacetylglutamine

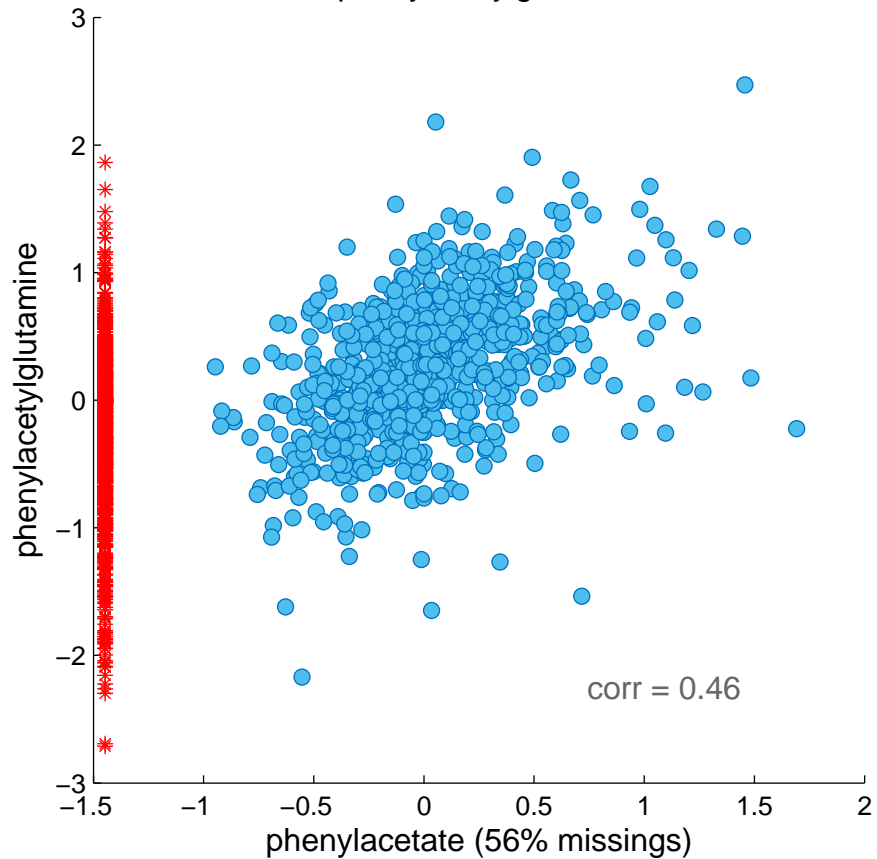

Concentrations of phenylacetylglutamine in missing and observed phenylacetate

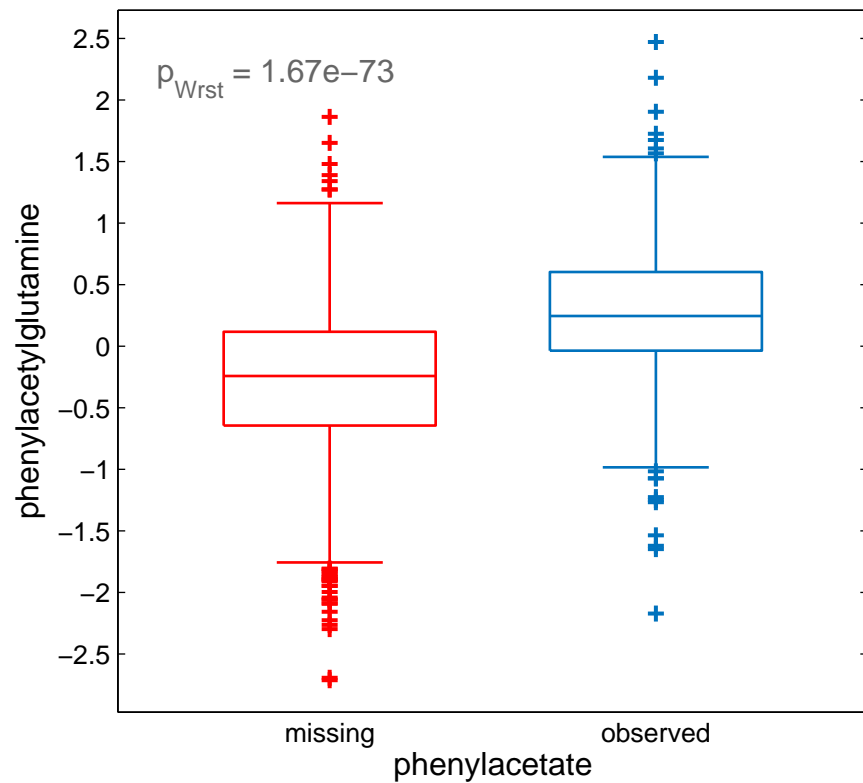

Missing values of phenyllactate (PLA)  
in 3-(4-hydroxyphenyl)lactate

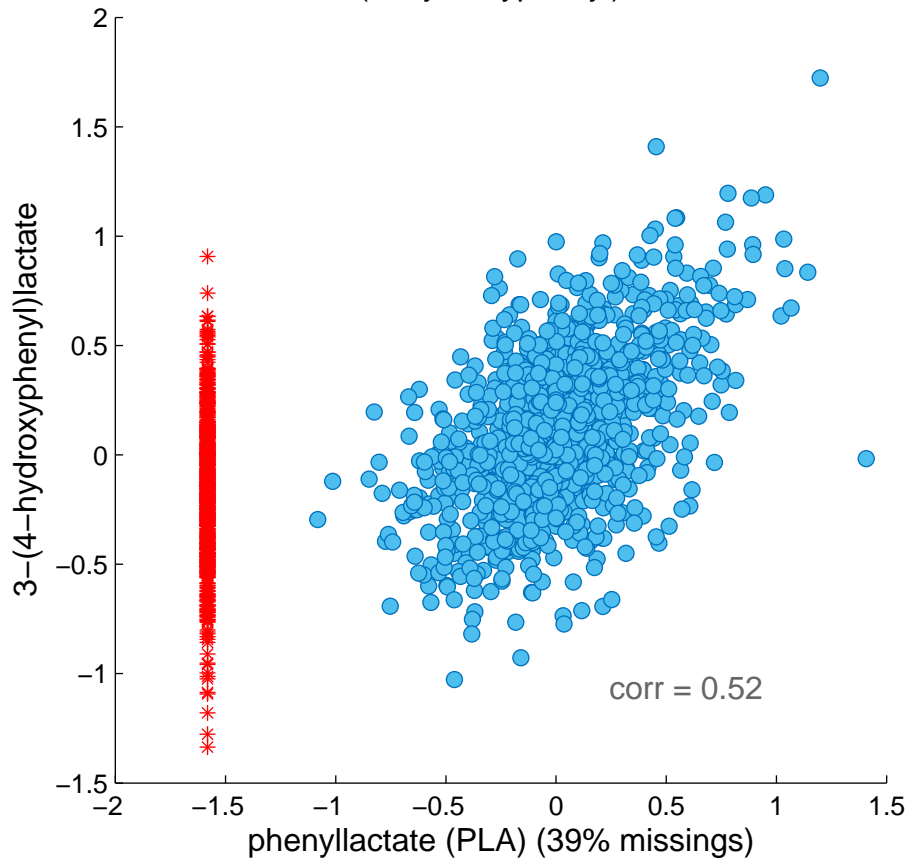

Concentrations of 3-(4-hydroxyphenyl)lactate in  
missing and observed phenyllactate (PLA)

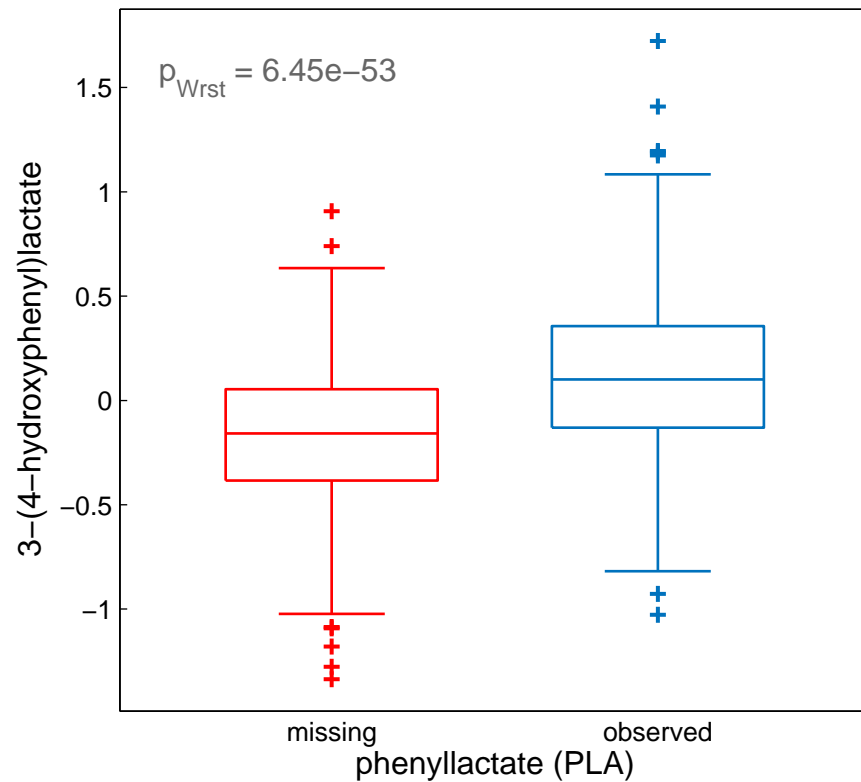

Missing values of piperine  
in X-11452

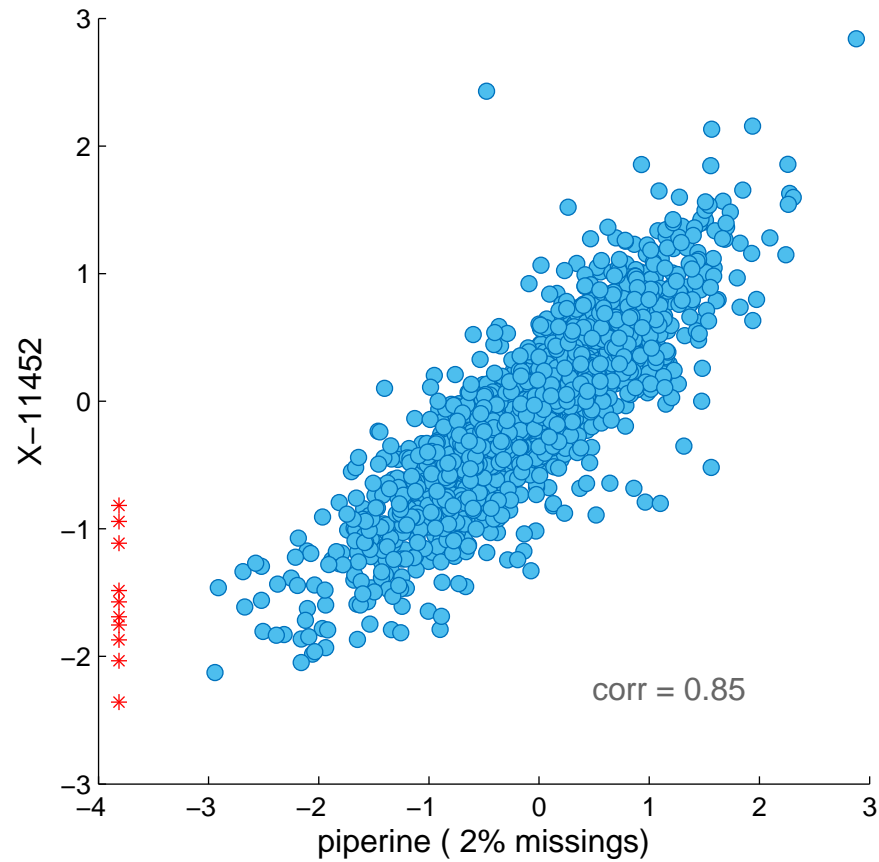

Concentrations of X-11452 in  
missing and observed piperine

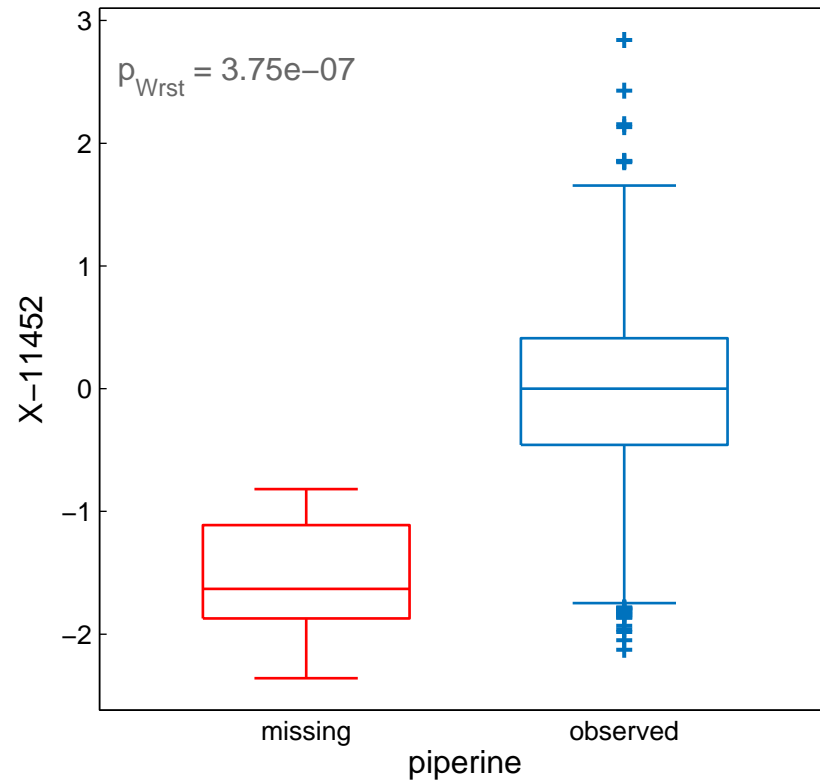

Missing values of pyridoxate  
in pantothenate

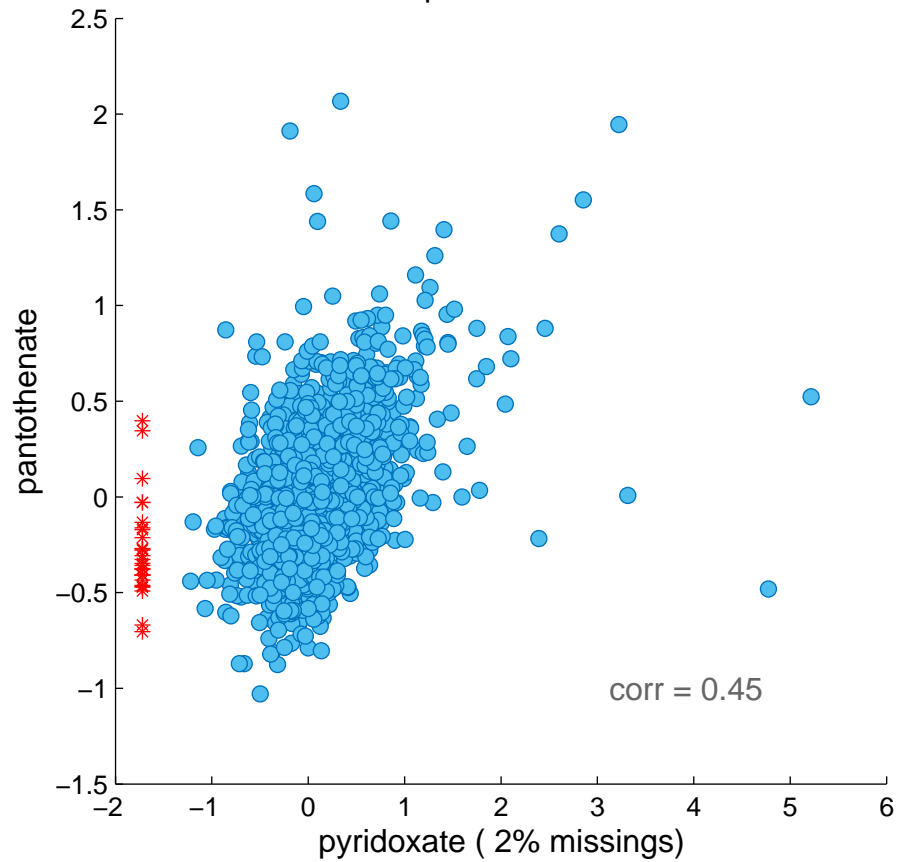

Concentrations of pantothenate in  
missing and observed pyridoxate

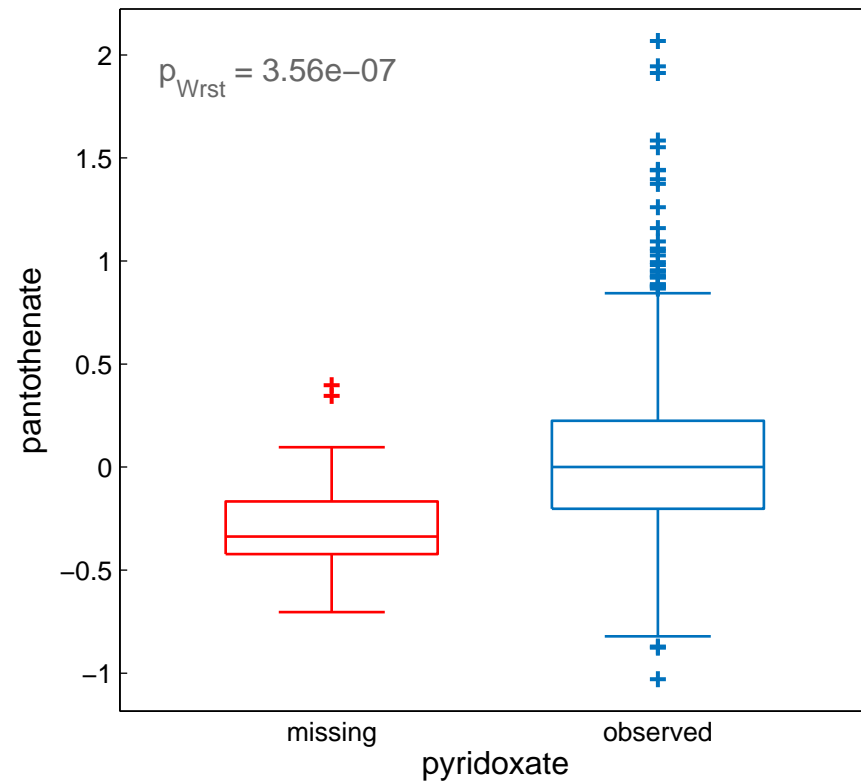

Missing values of pyroglutamine  
in creatine

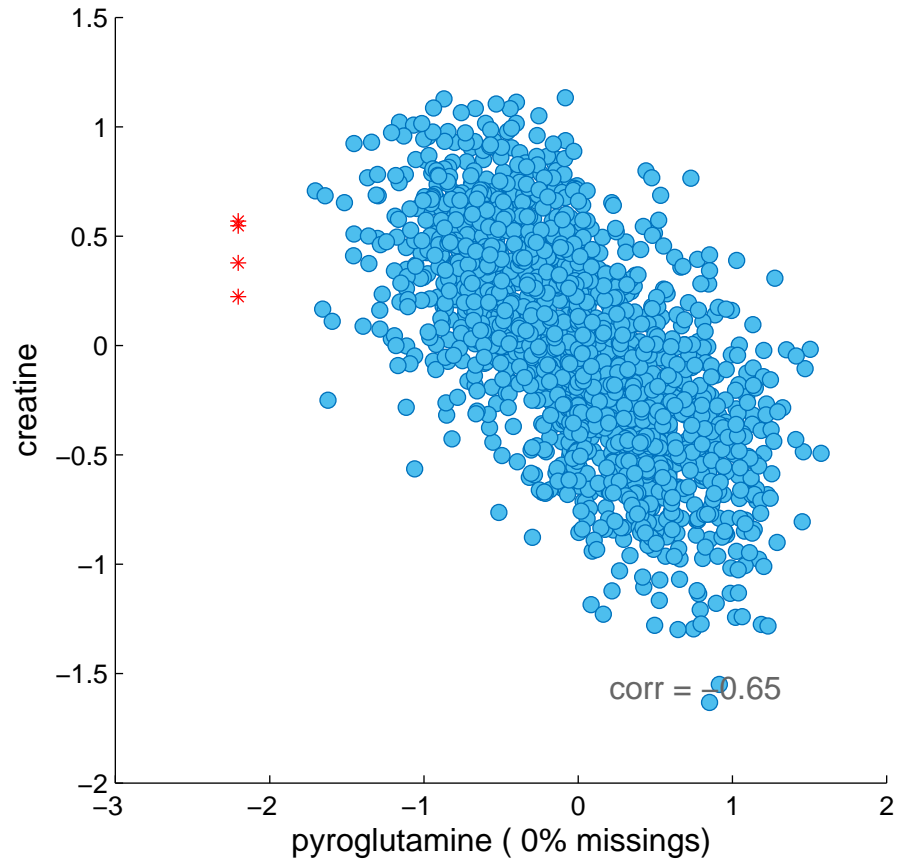

Concentrations of creatine in  
missing and observed pyroglutamine

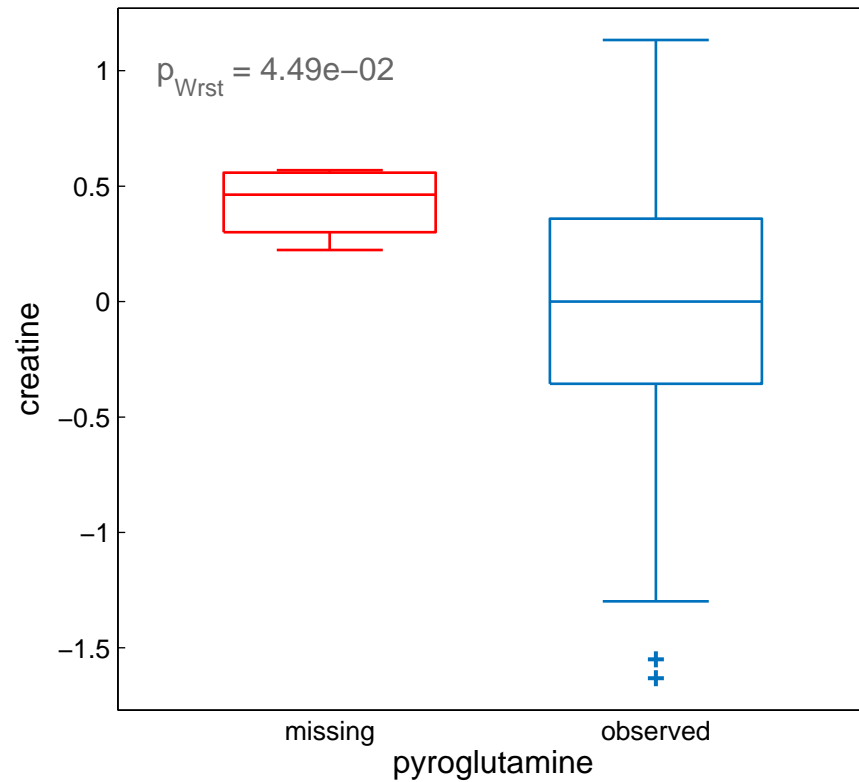



Missing values of pyroglutamylglycine  
in phenylalanylphenylalanine

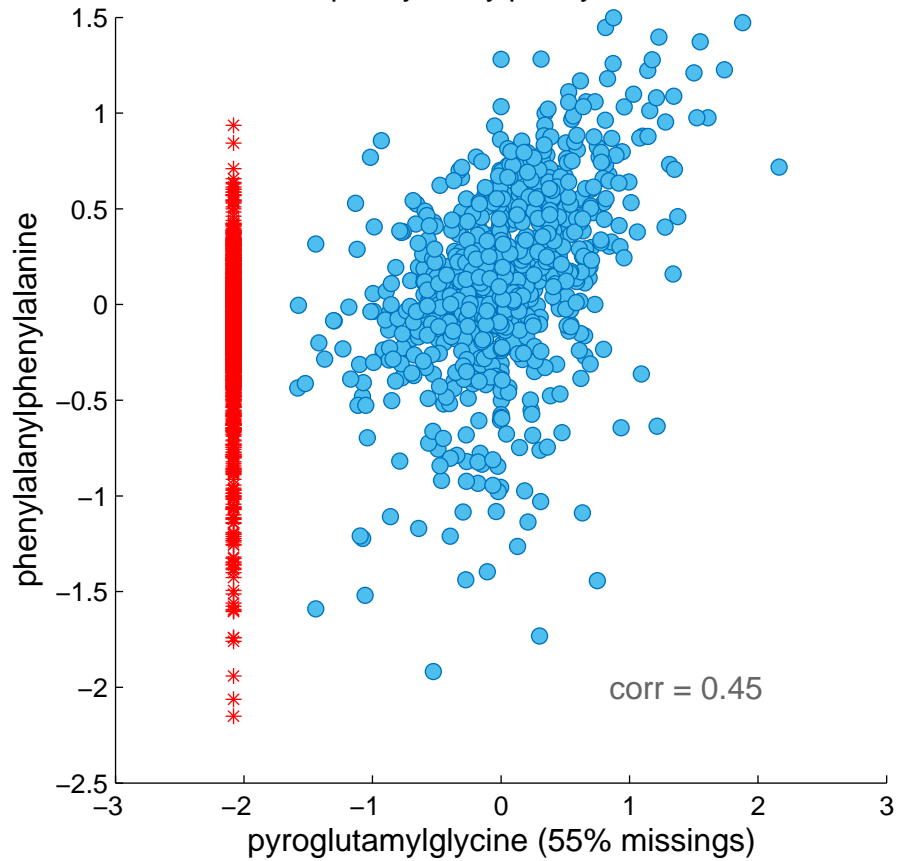

Concentrations of phenylalanylphenylalanine in  
missing and observed pyroglutamylglycine

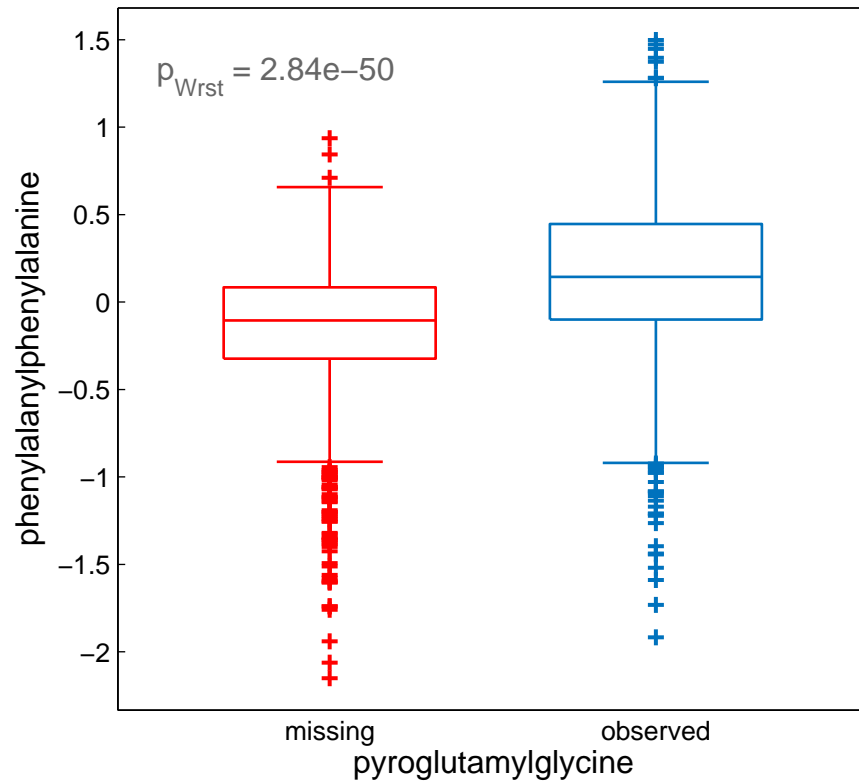

Missing values of 1-stearoylglycerophosphoethanolamine in 1-palmitoylglycerophosphoethanolamine

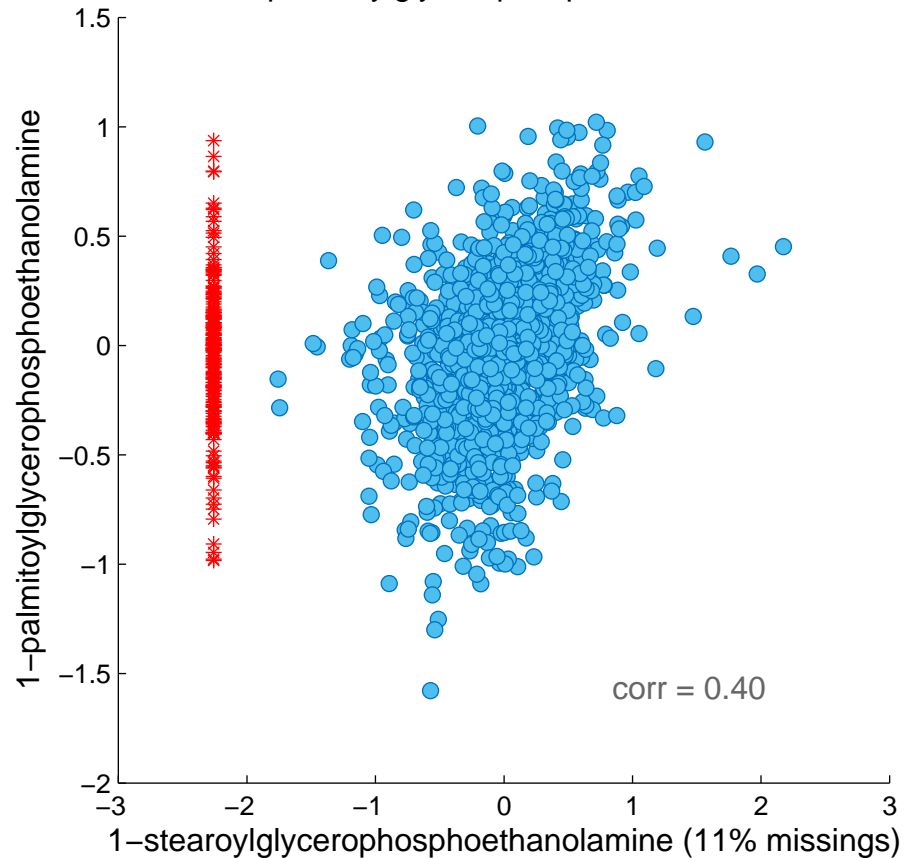

Concentrations of 1-palmitoylglycerophosphoethanolamine in missing and observed 1-stearoylglycerophosphoethanolamine

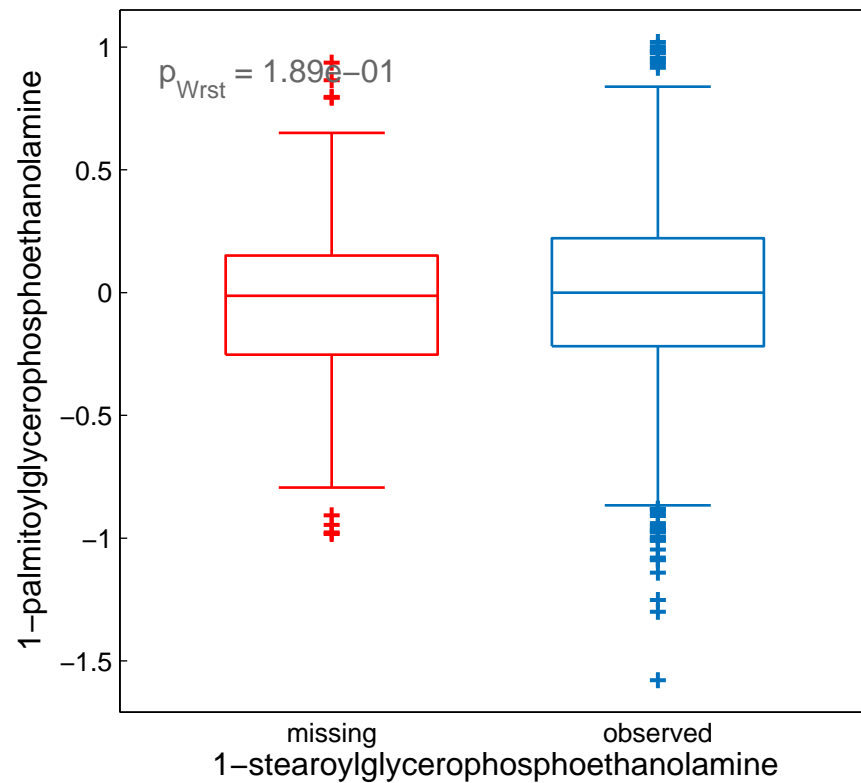

Missing values of pyruvate  
in alanine

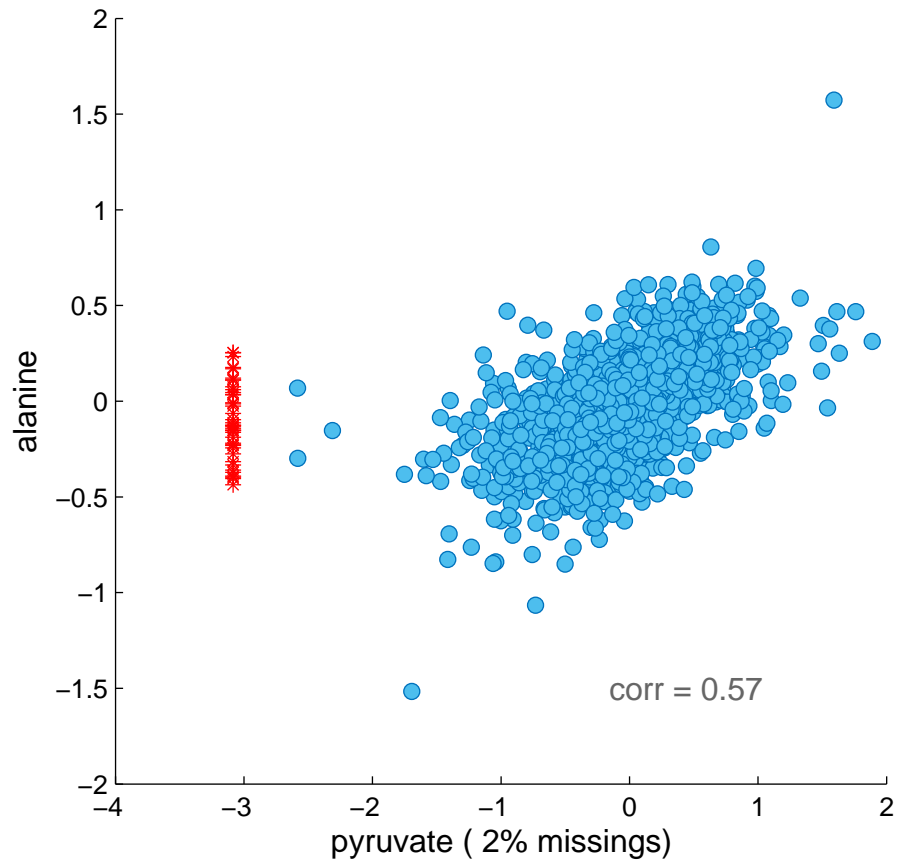

Concentrations of alanine in  
missing and observed pyruvate

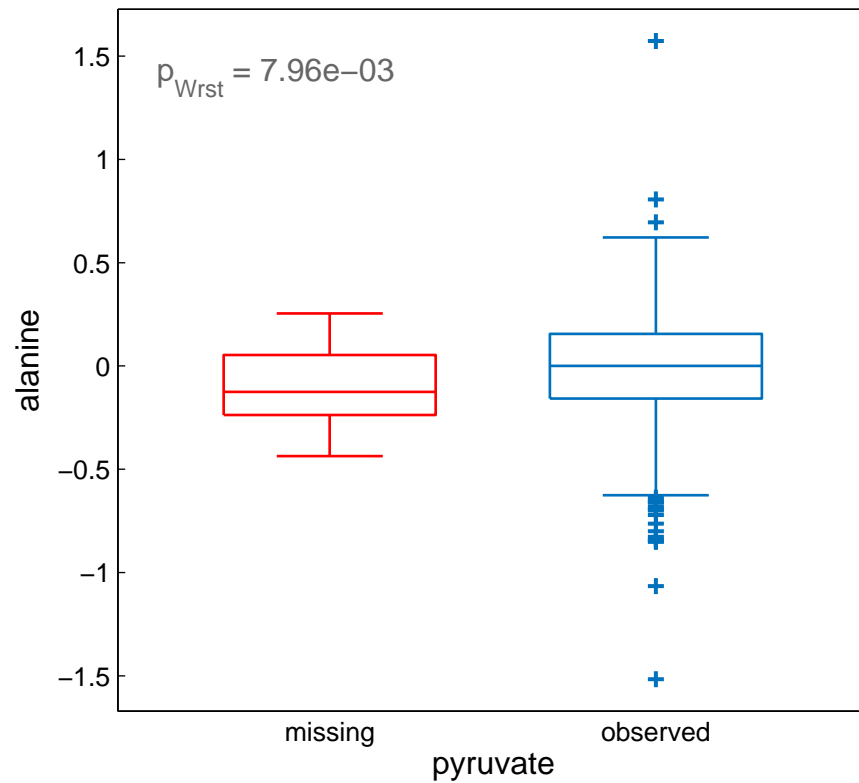

Missing values of quinate  
in X-12039

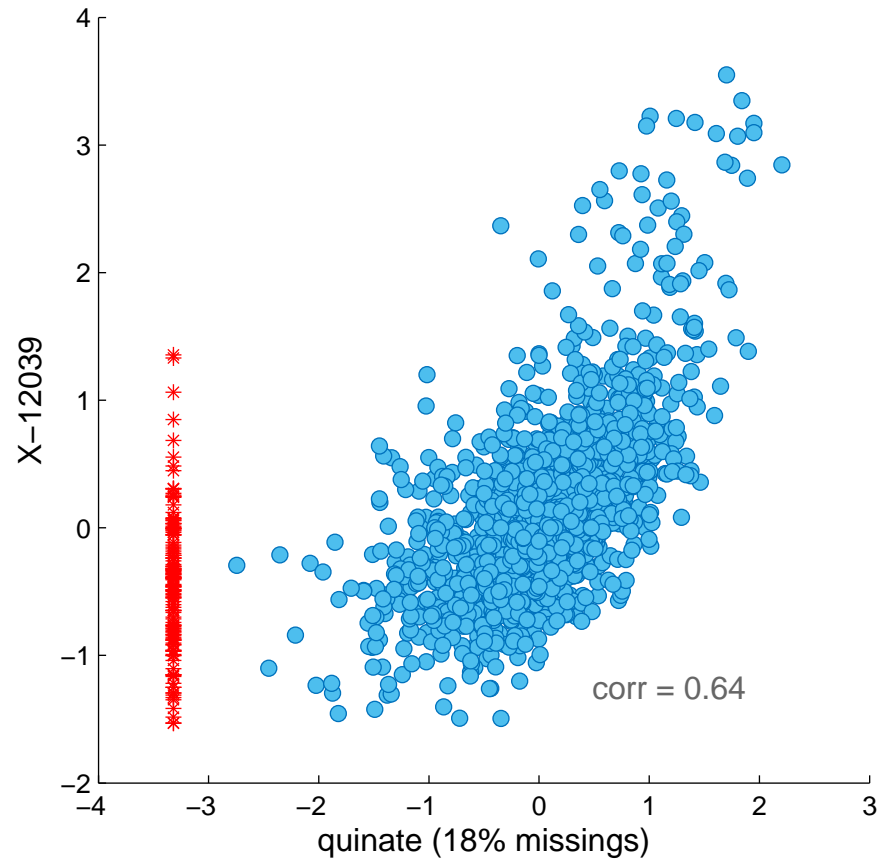

Concentrations of X-12039 in  
missing and observed quinate

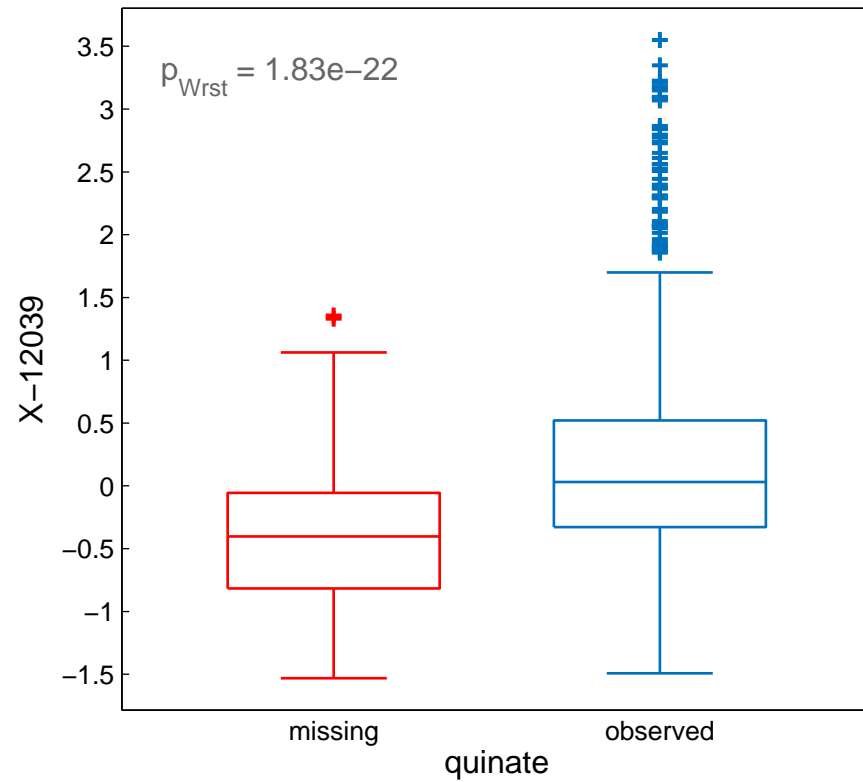

Missing values of saccharin  
in X-13640

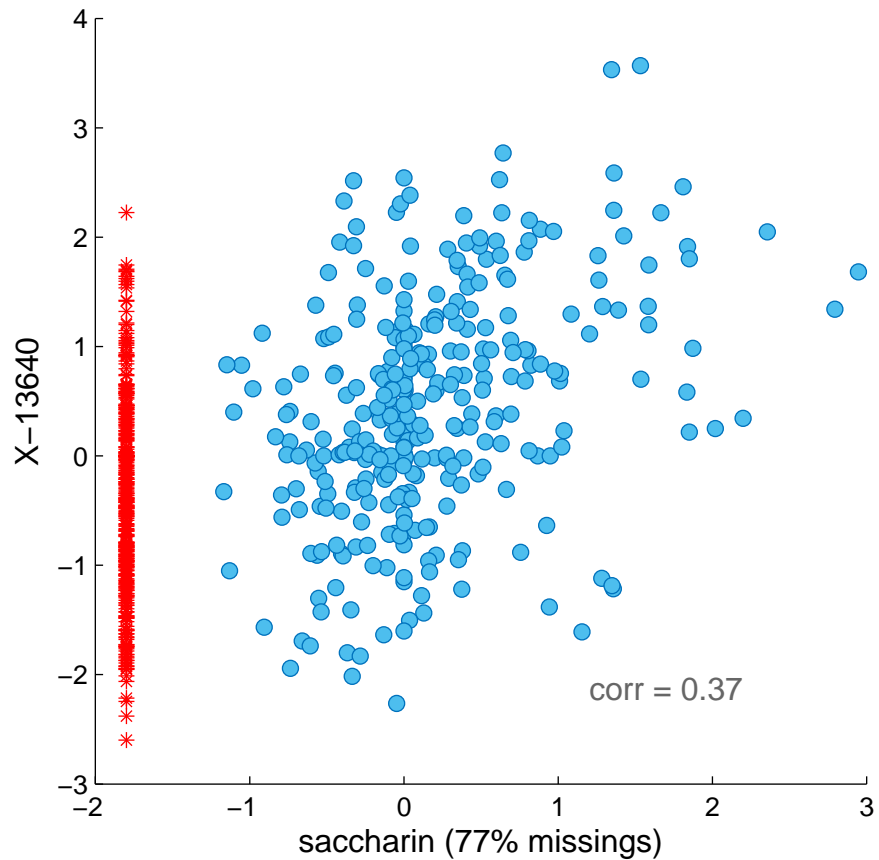

Concentrations of X-13640 in  
missing and observed saccharin

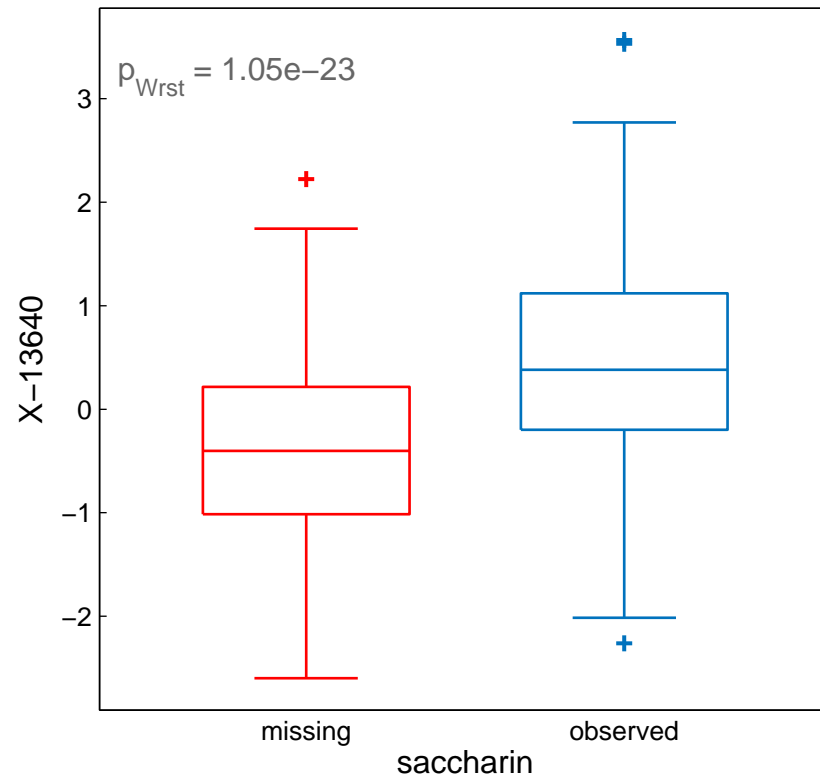

Missing values of salicylate  
in 2-hydroxyhippurate (salicylurate)

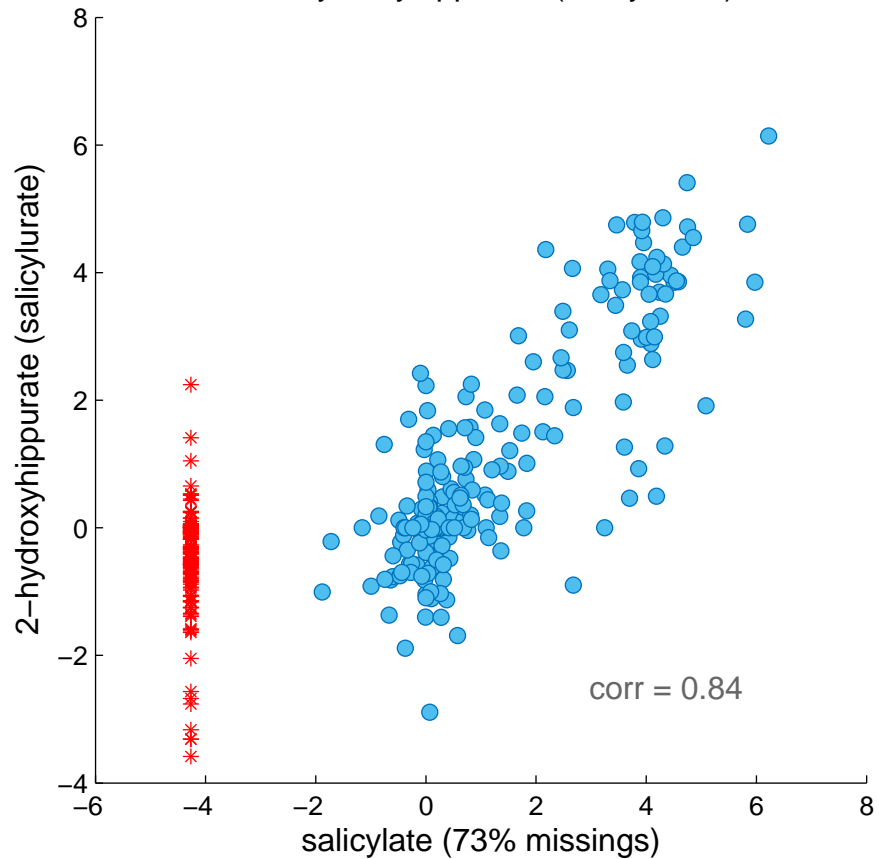

Concentrations of 2-hydroxyhippurate (salicylurate) in  
missing and observed salicylate

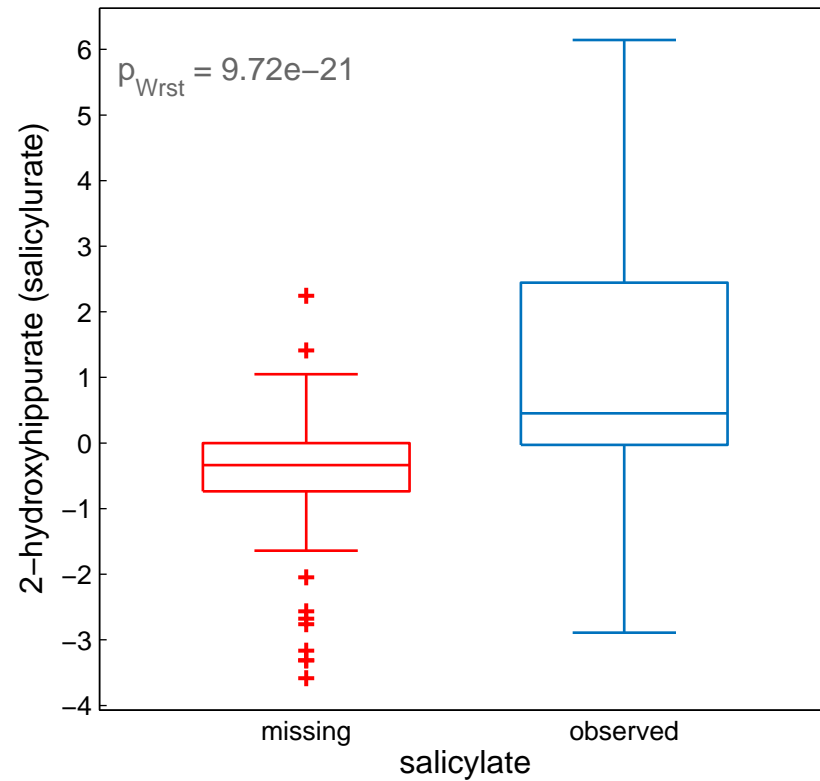

Missing values of salicylic glucuronide  
in 2-hydroxyhippurate (salicylurate)

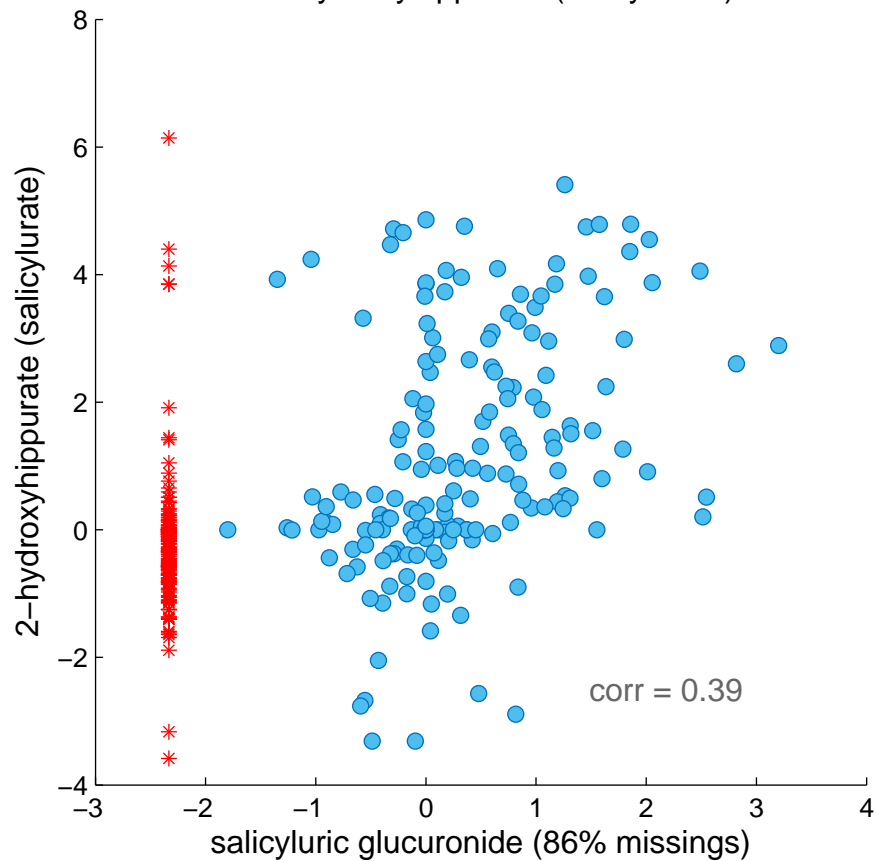

Concentrations of 2-hydroxyhippurate (salicylurate) in  
missing and observed salicylic glucuronide

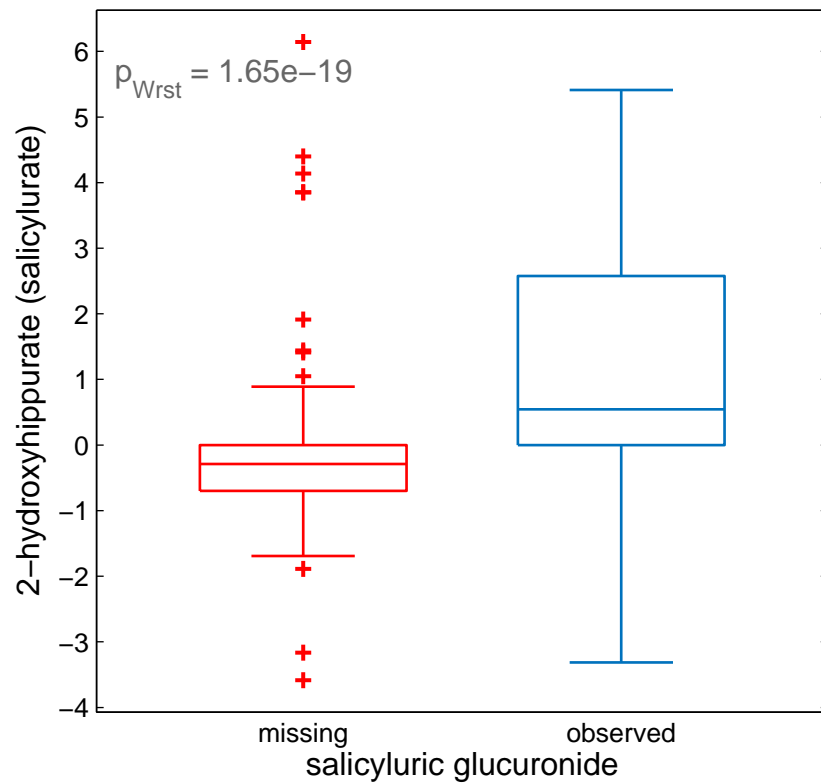

Missing values of scylo-inositol  
in myo-inositol

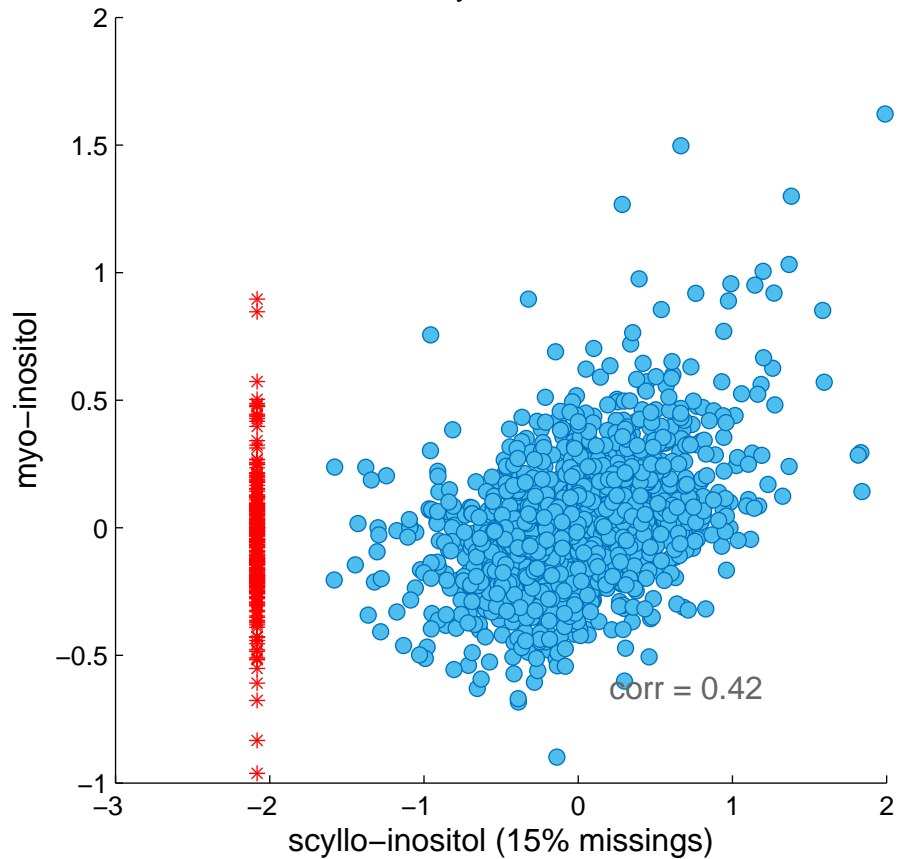

Concentrations of myo-inositol in  
missing and observed scylo-inositol

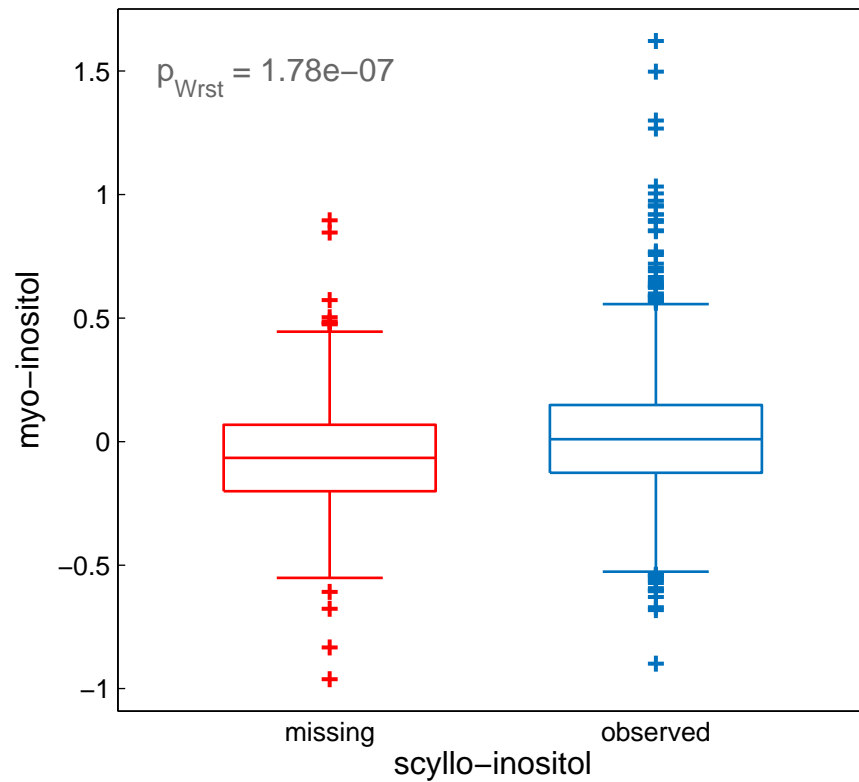



Missing values of sebacate (decanedioate)  
in tetradecanedioate

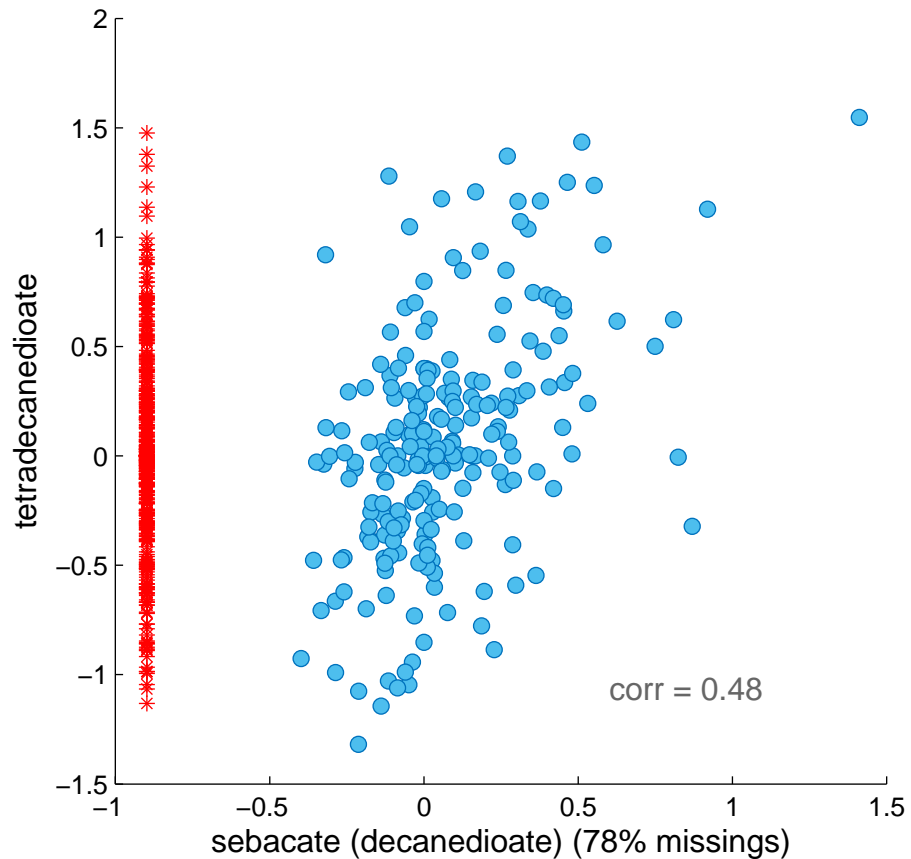

Concentrations of tetradecanedioate in  
missing and observed sebacate (decanedioate)

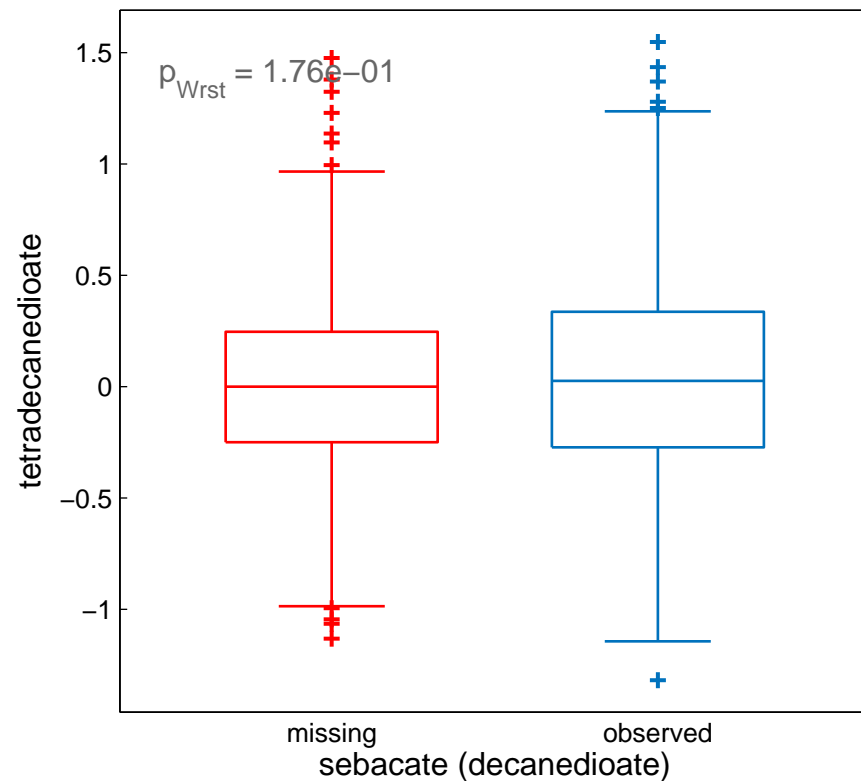

Missing values of 1-stearoylglycerophosphoinositol  
in 1-arachidonoylglycerophosphoinositol

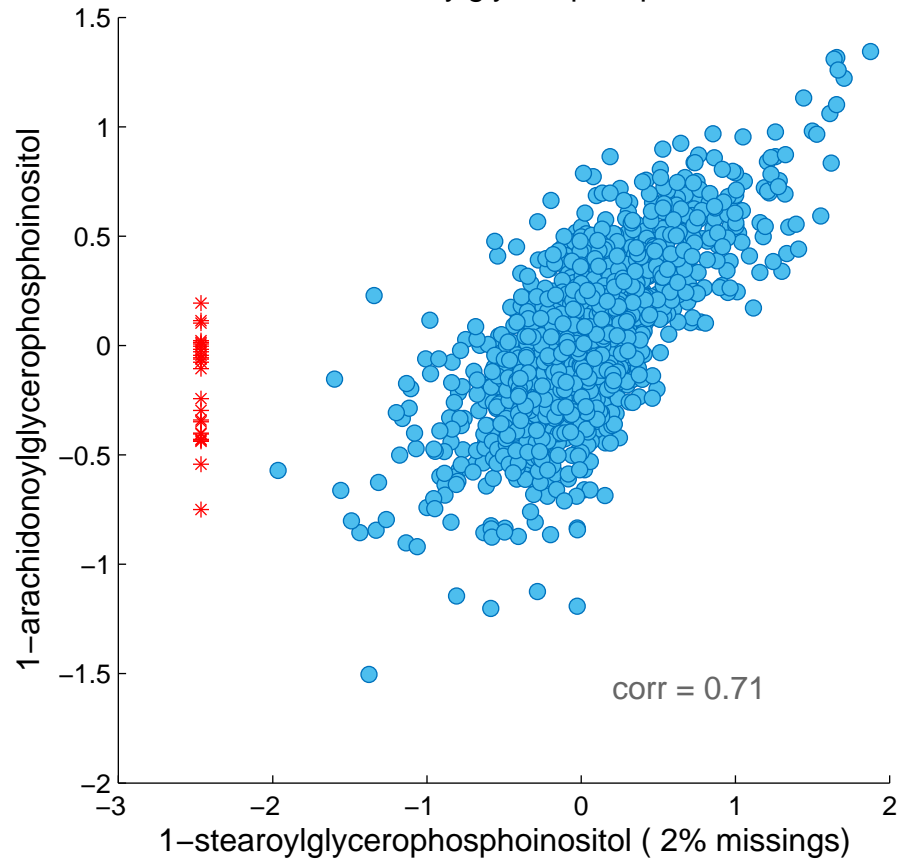

Concentrations of 1-arachidonoylglycerophosphoinositol in  
missing and observed 1-stearoylglycerophosphoinositol

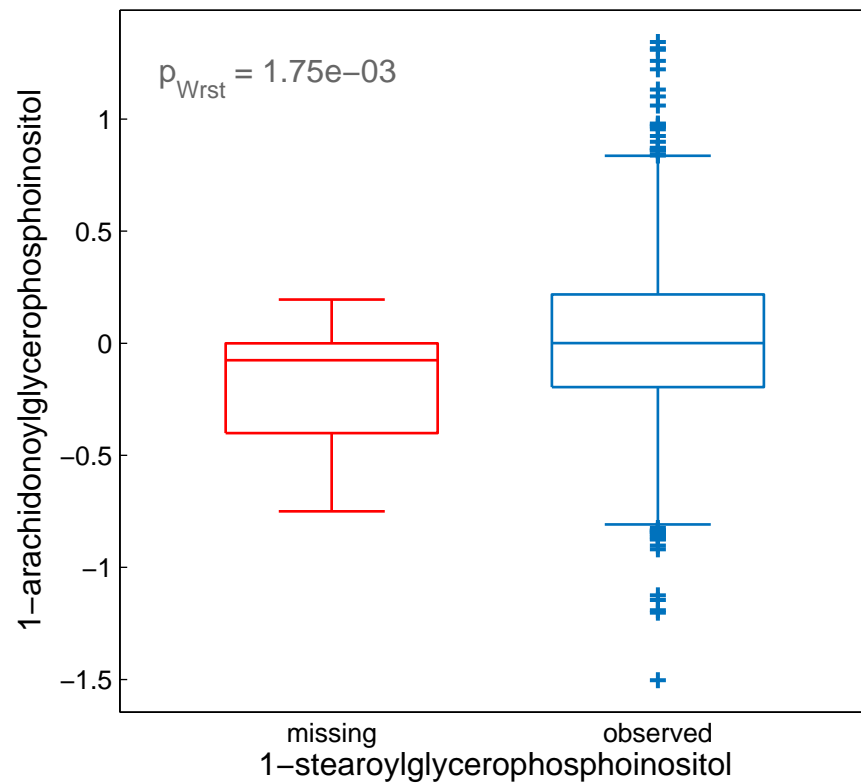

Missing values of stearidonate (18:4n3)  
in linolenate [alpha or gamma; (18:3n3 or 6)]

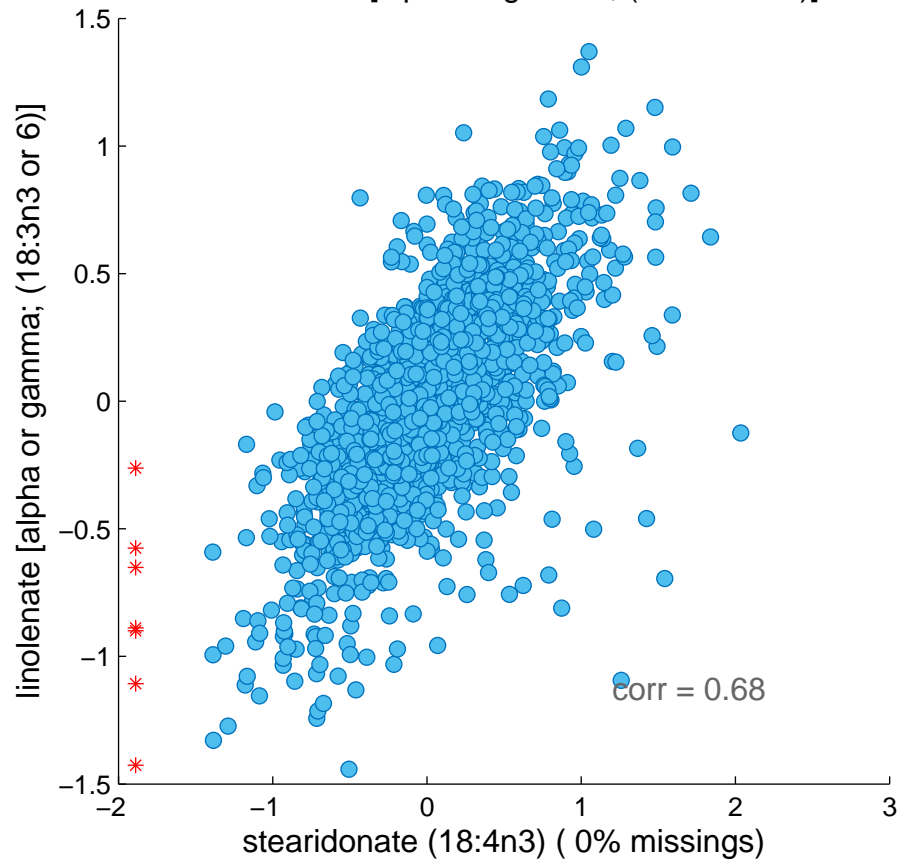

Concentrations of linolenate [alpha or gamma; (18:3n3 or 6)] in  
missing and observed stearidonate (18:4n3)

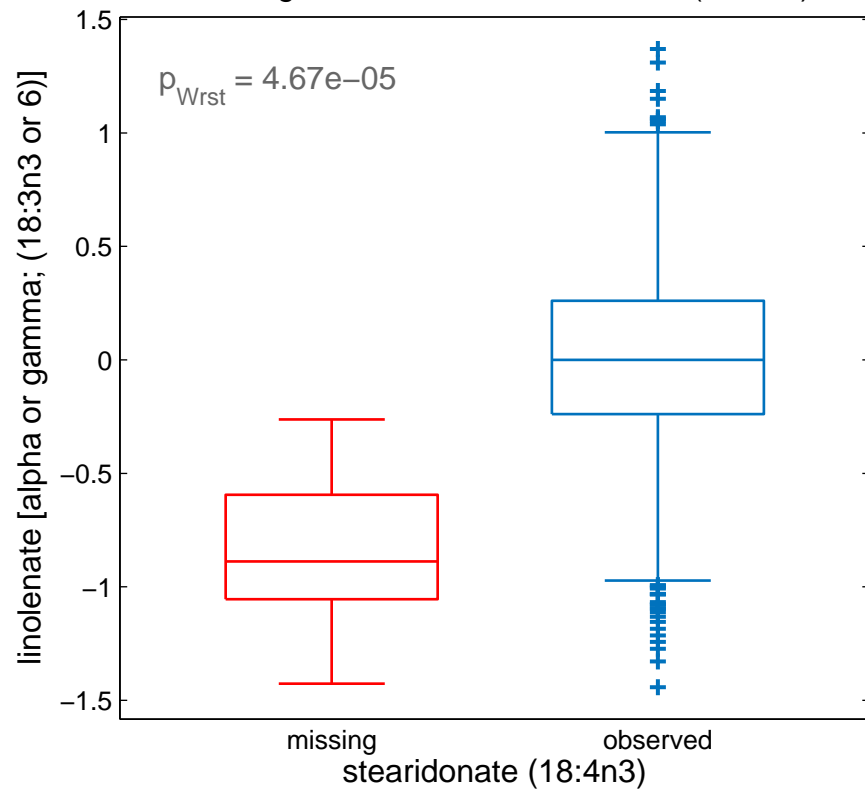

Missing values of stearyl carnitine  
in oleoyl carnitine

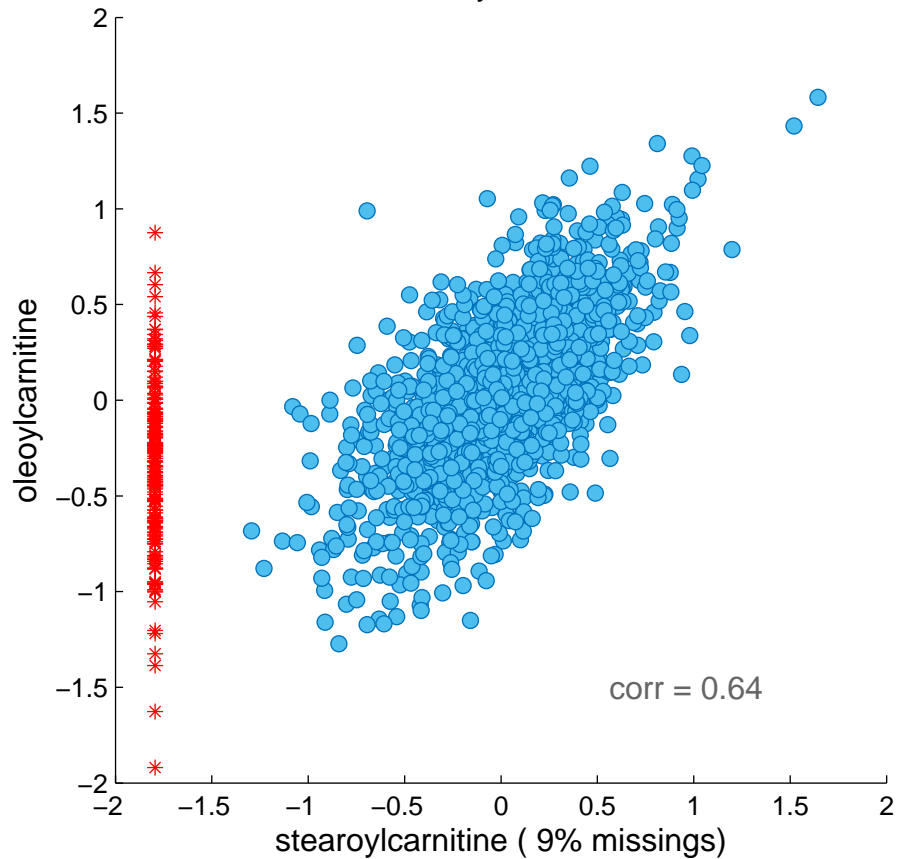

Concentrations of oleoyl carnitine in  
missing and observed stearyl carnitine

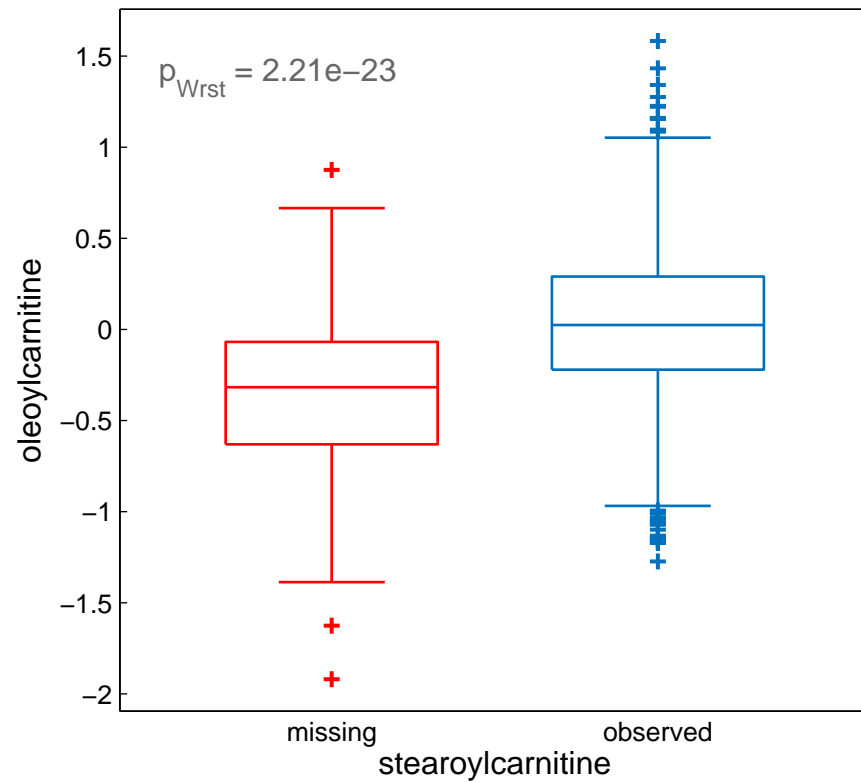

Missing values of succinylcarnitine  
in acetylcarnitine

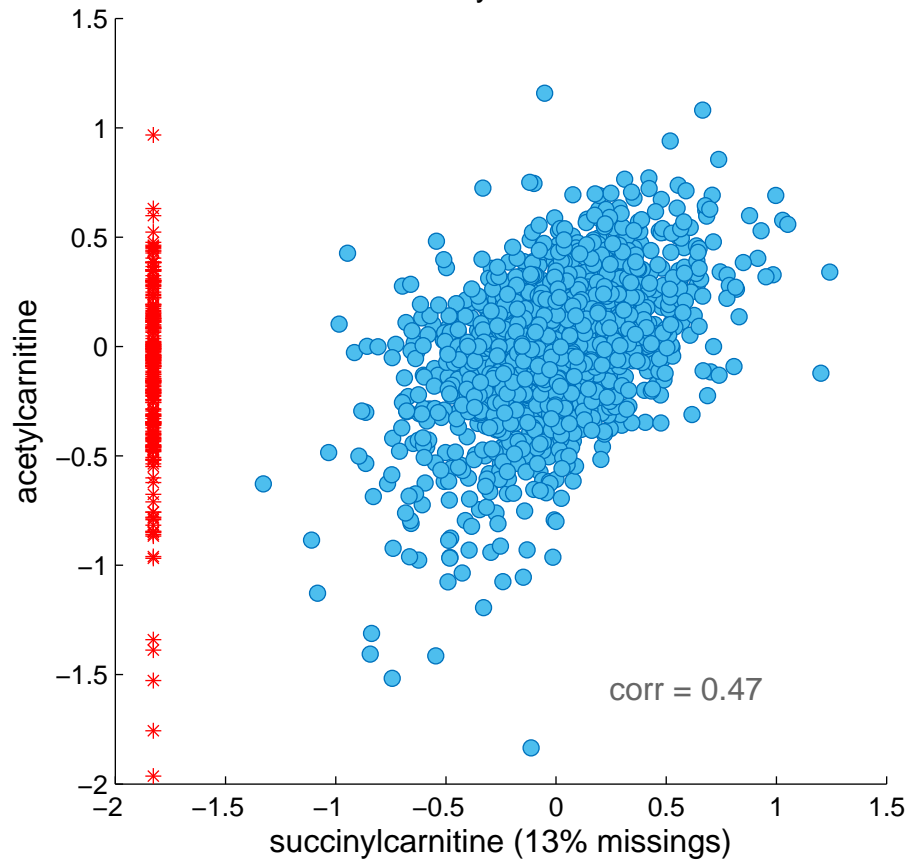

Concentrations of acetylcarnitine in  
missing and observed succinylcarnitine

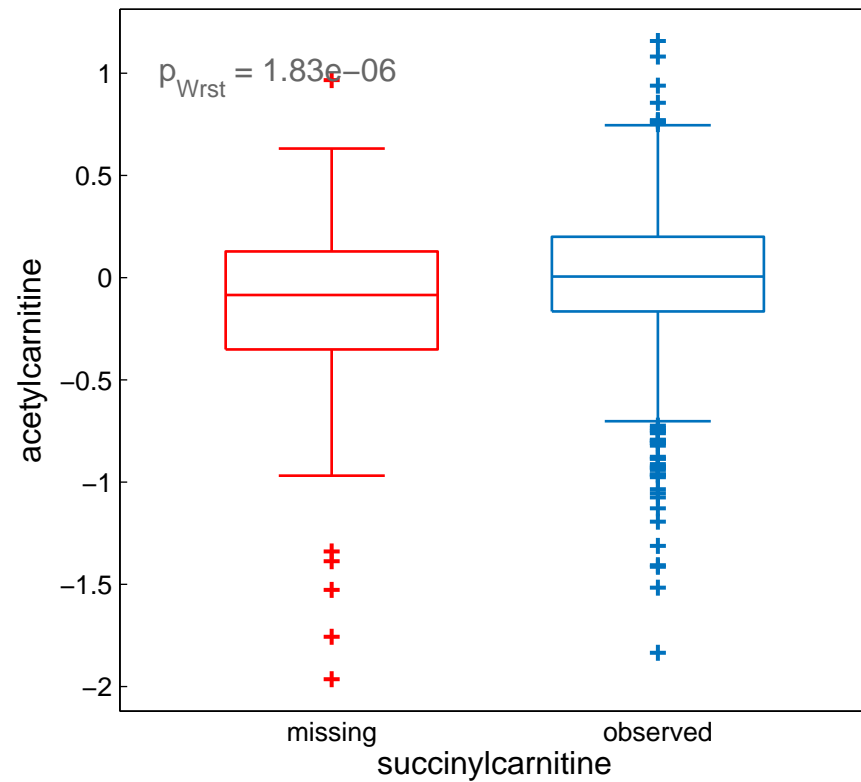

Missing values of taurochenodeoxycholate  
in taurocholate

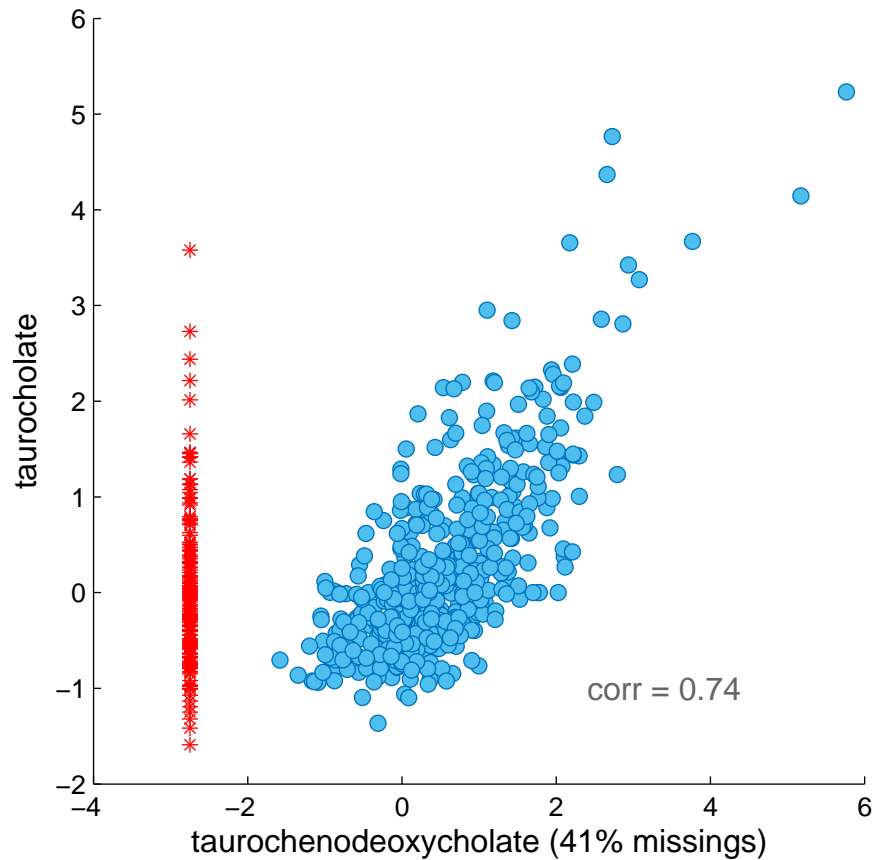

Concentrations of taurocholate in  
missing and observed taurochenodeoxycholate

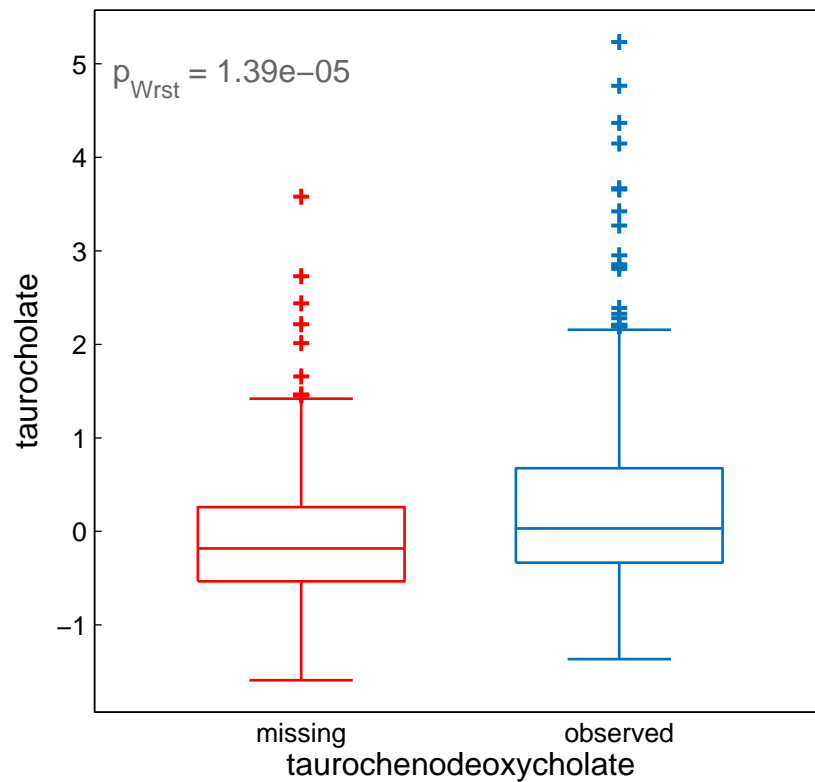

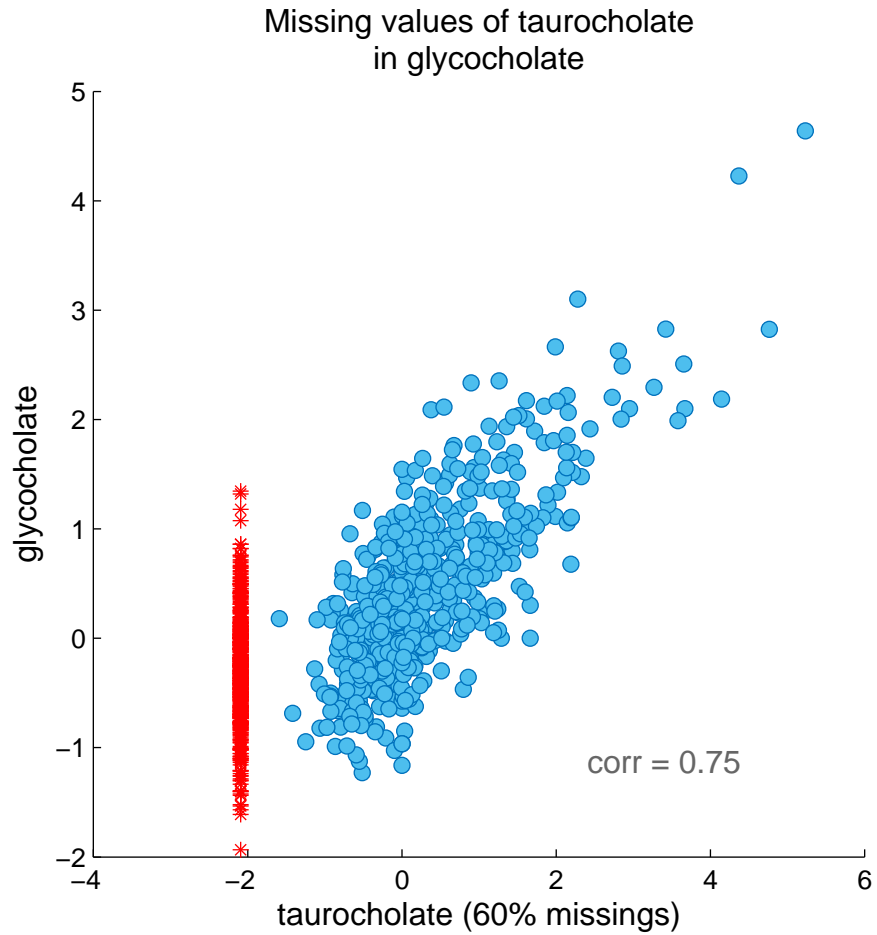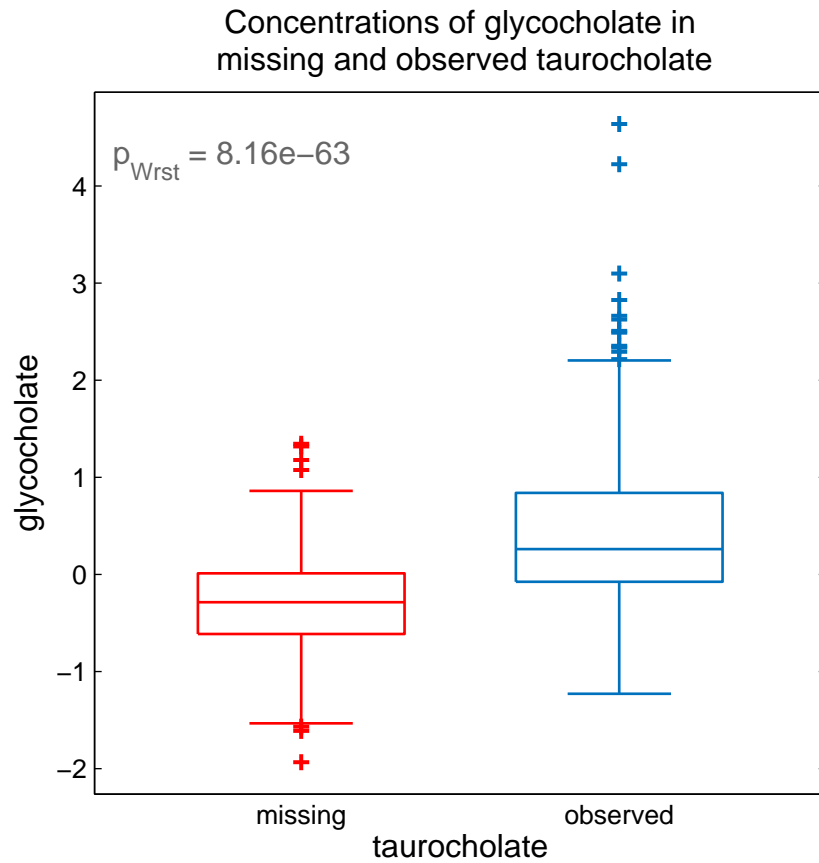

Missing values of taurodeoxycholate in taurocholate

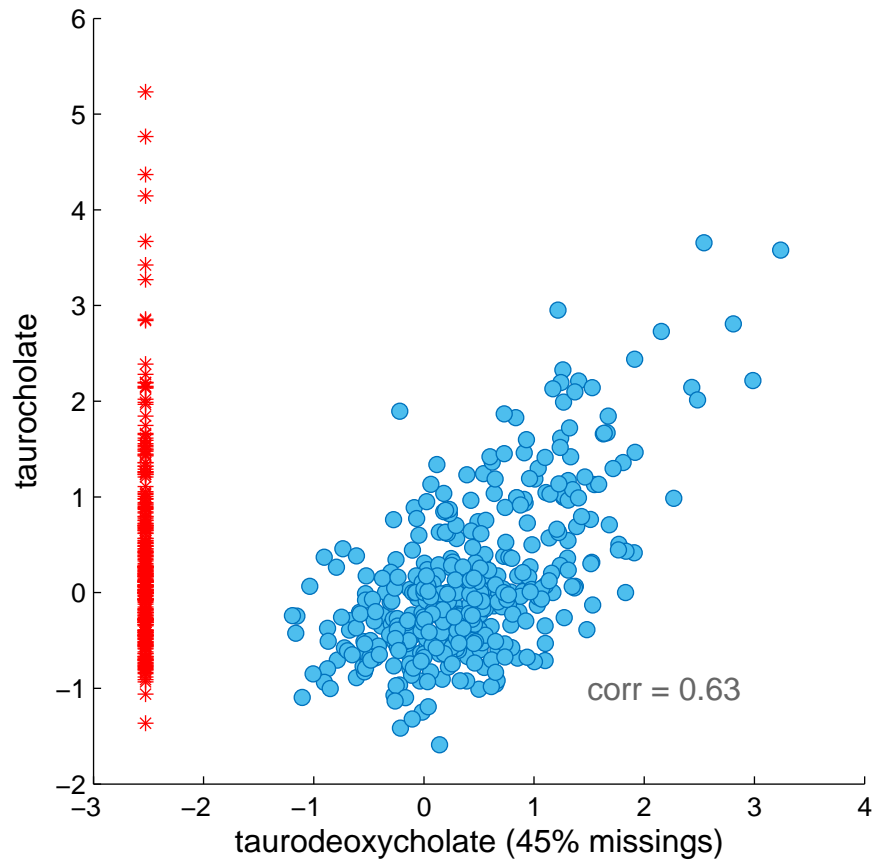

Concentrations of taurocholate in missing and observed taurodeoxycholate

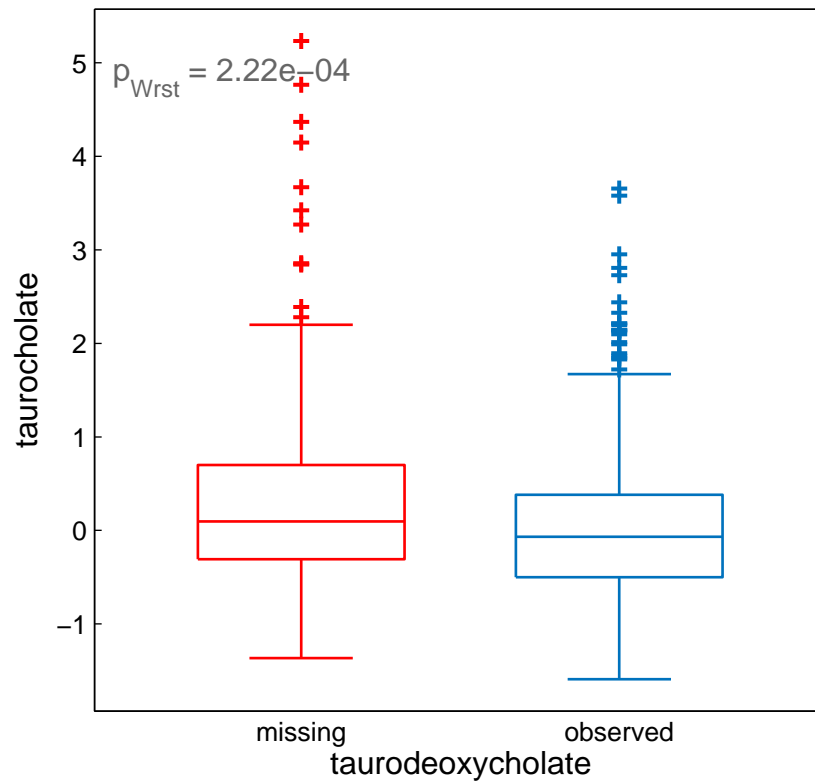



Missing values of tauroolithocholate 3-sulfate  
in X-14626

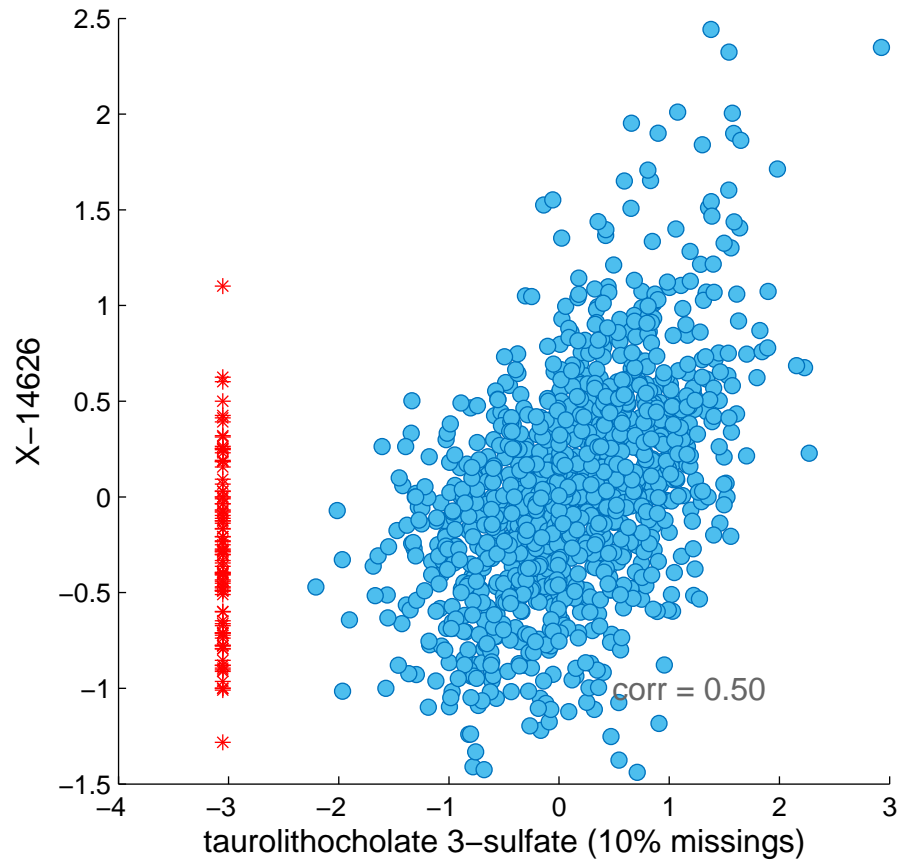

Concentrations of X-14626 in  
missing and observed tauroolithocholate 3-sulfate

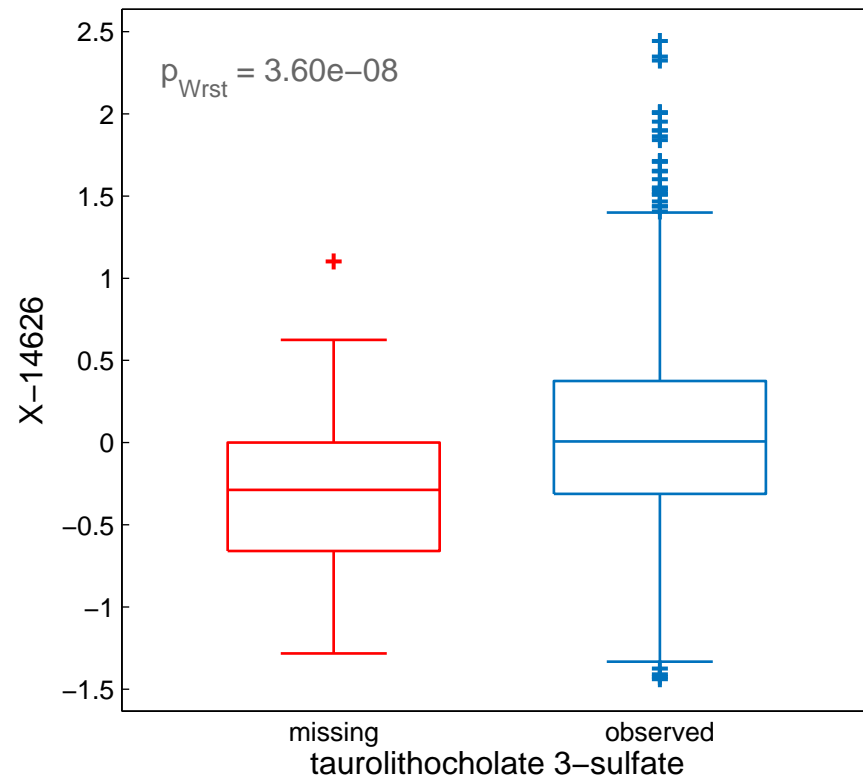

Missing values of tetradecanedioate  
in hexadecanedioate

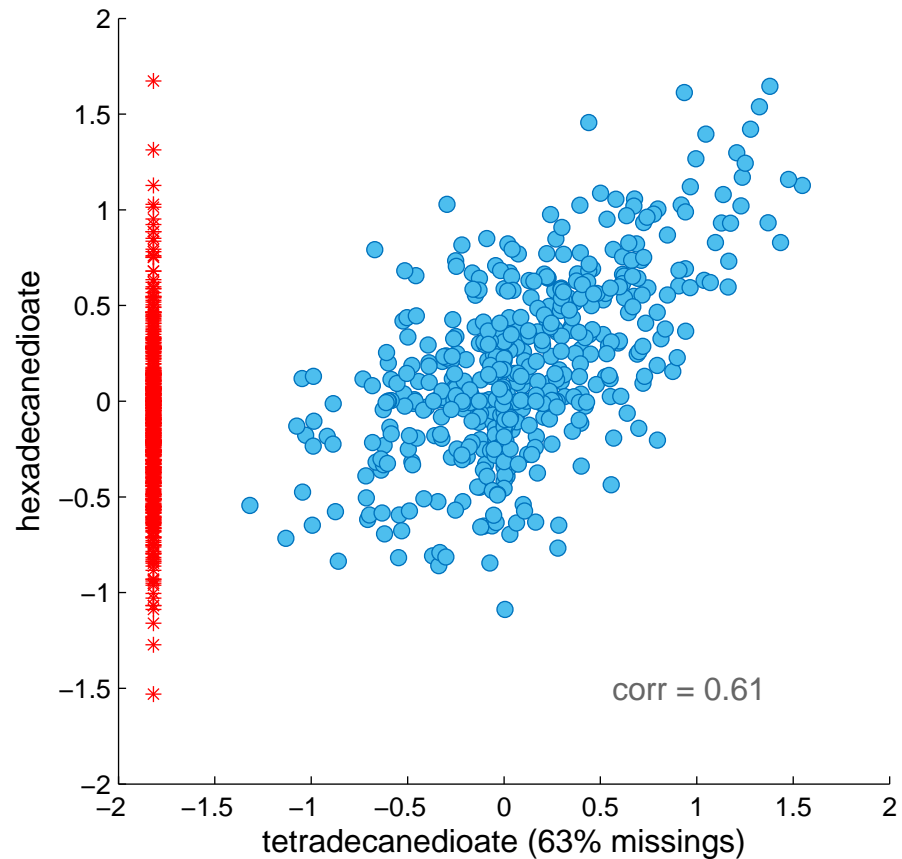

Concentrations of hexadecanedioate in  
missing and observed tetradecanedioate

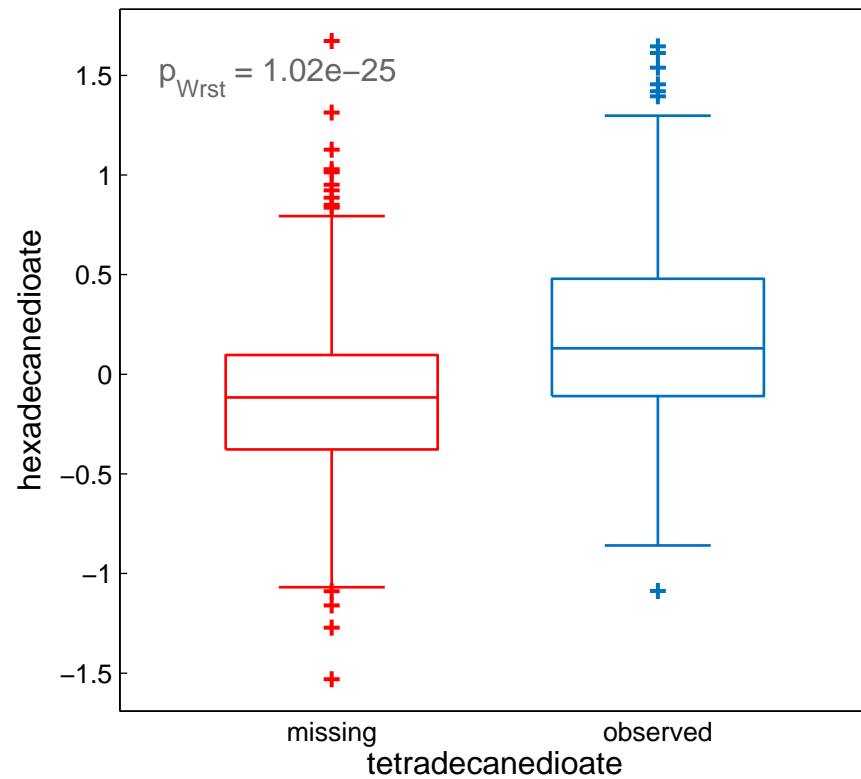

Missing values of 1;3;7-trimethylurate  
in caffeine

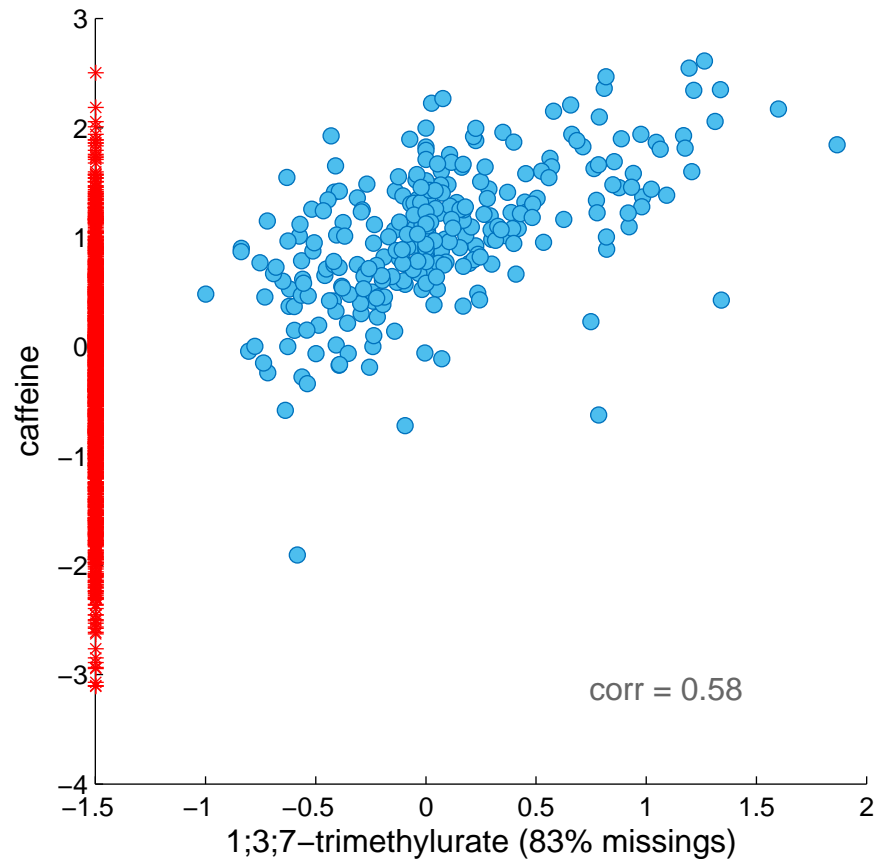

Concentrations of caffeine in  
missing and observed 1;3;7-trimethylurate

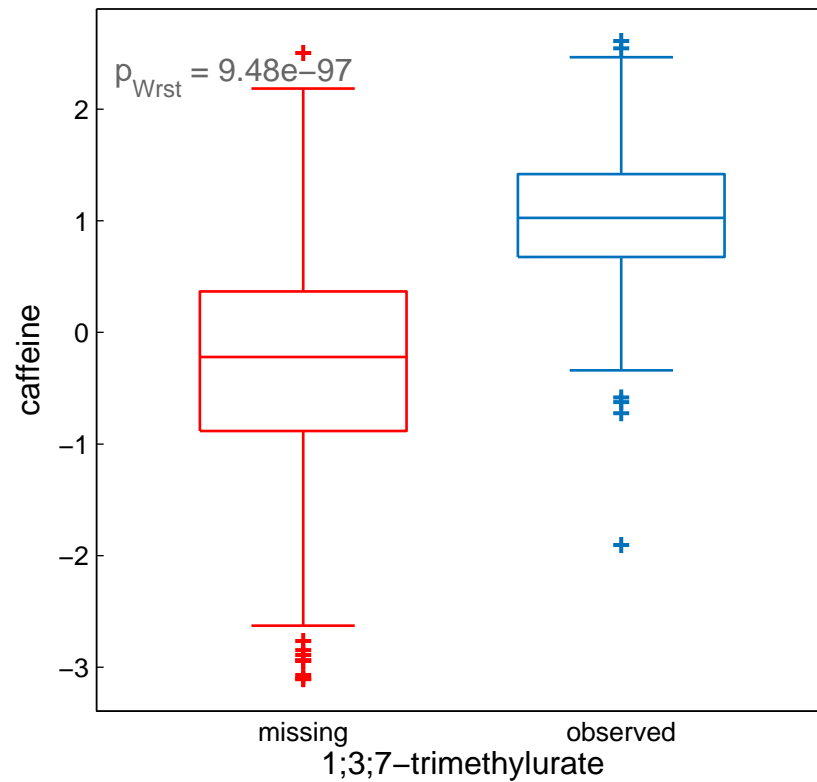

Missing values of theophylline  
in paraxanthine

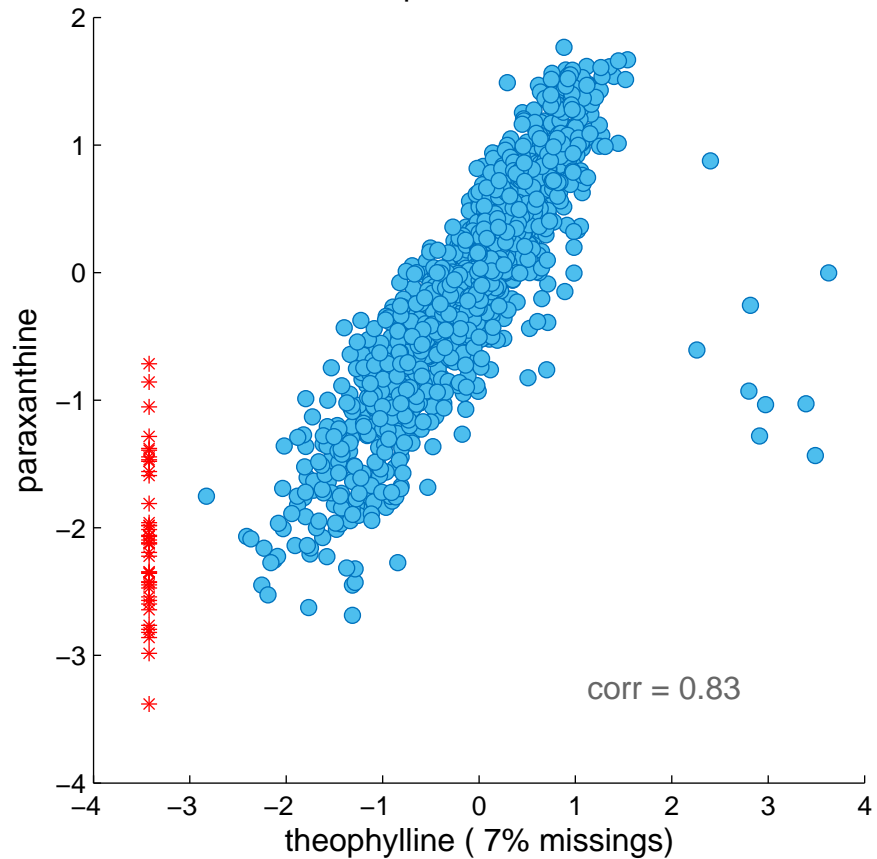

Concentrations of paraxanthine in  
missing and observed theophylline

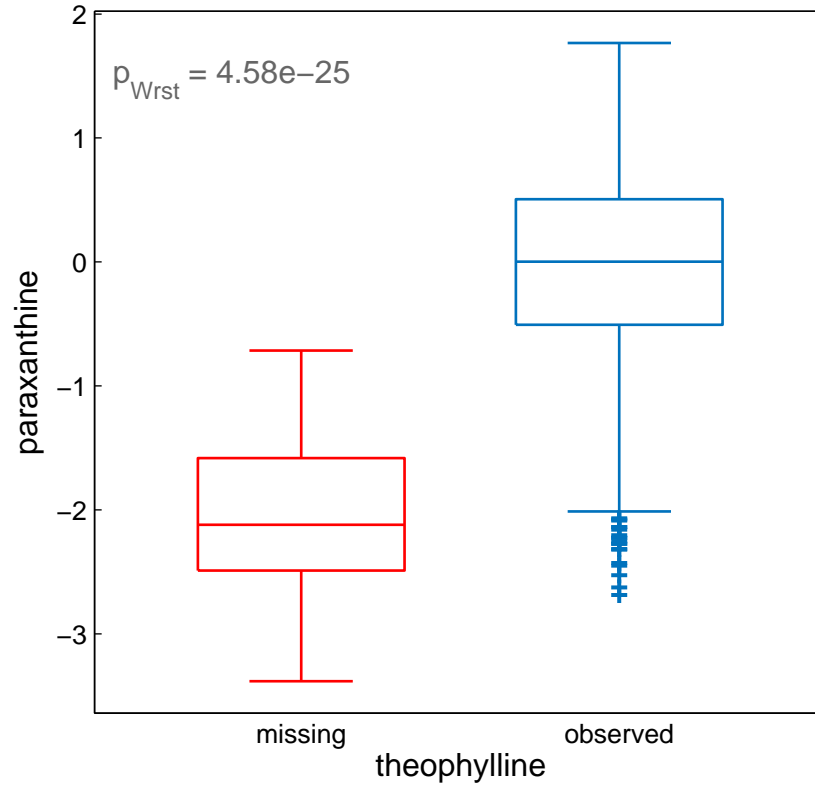

Missing values of threitol  
in myo-inositol

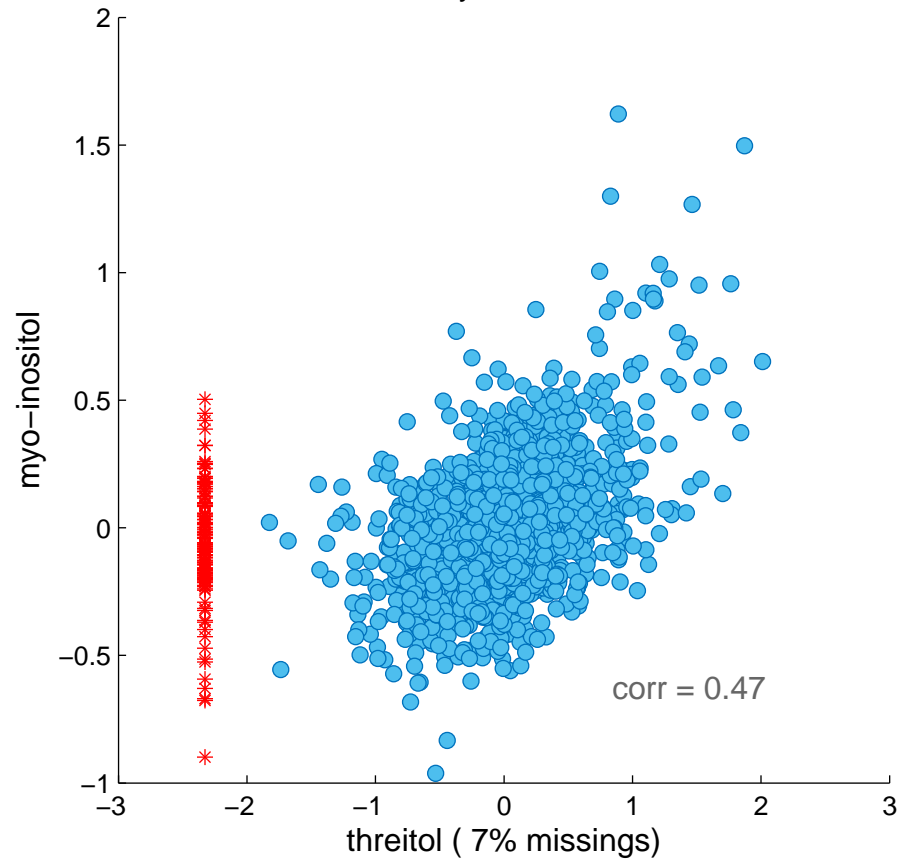

Concentrations of myo-inositol in  
missing and observed threitol

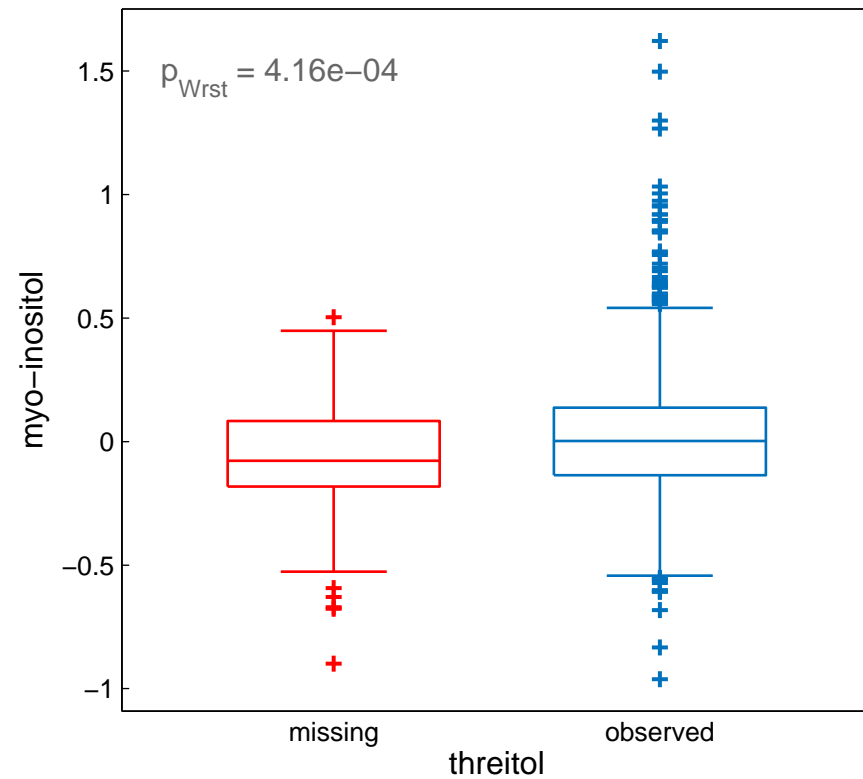

Missing values of threonine  
in methionine

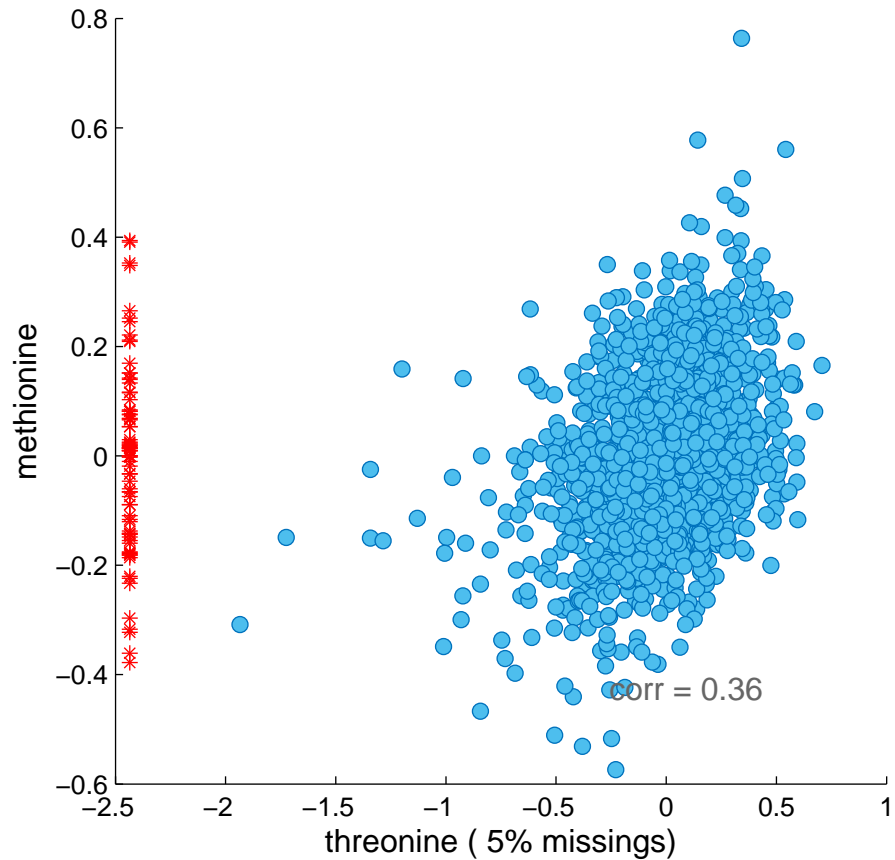

Concentrations of methionine in  
missing and observed threonine

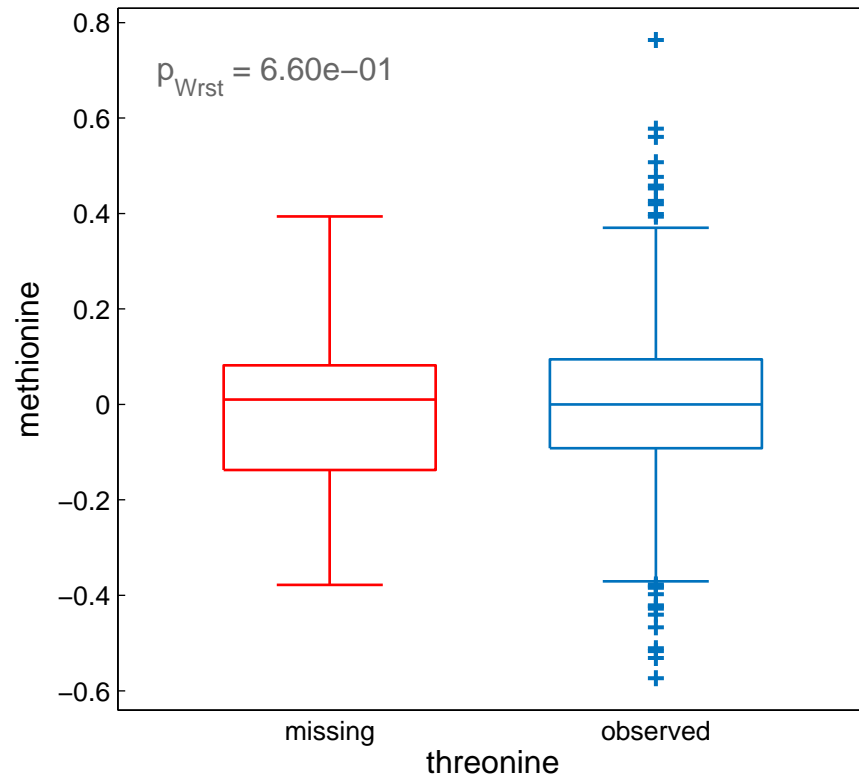

Missing values of thromboxane B2  
in dehydroisoandrosterone sulfate (DHEA-S)

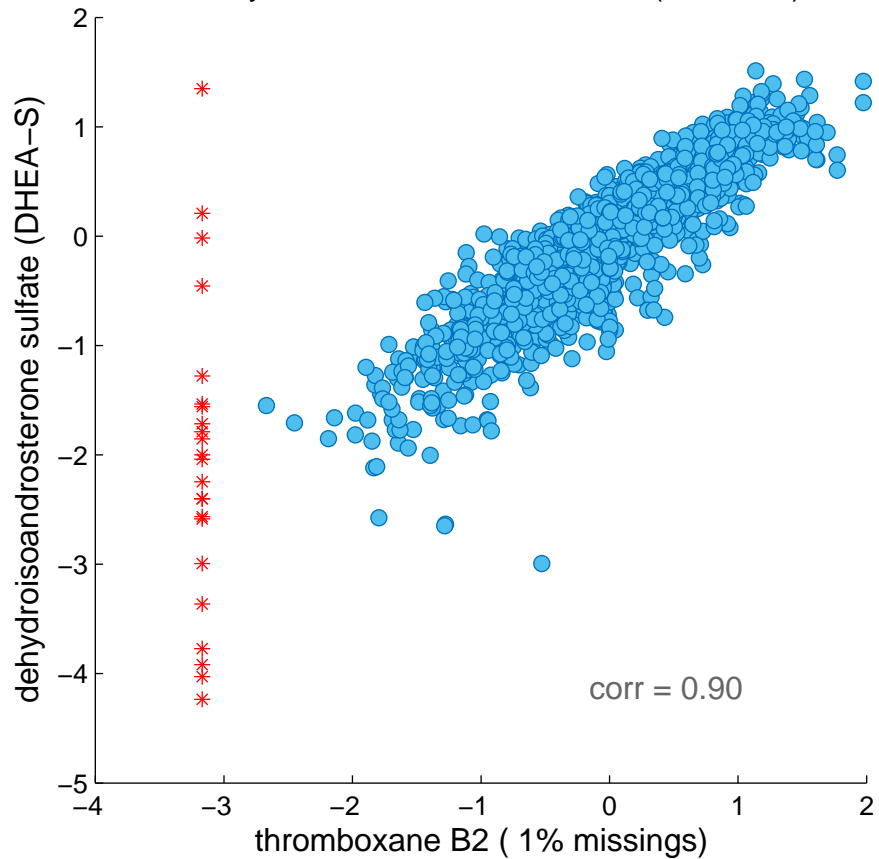

Concentrations of dehydroisoandrosterone sulfate (DHEA-S) in  
missing and observed thromboxane B2

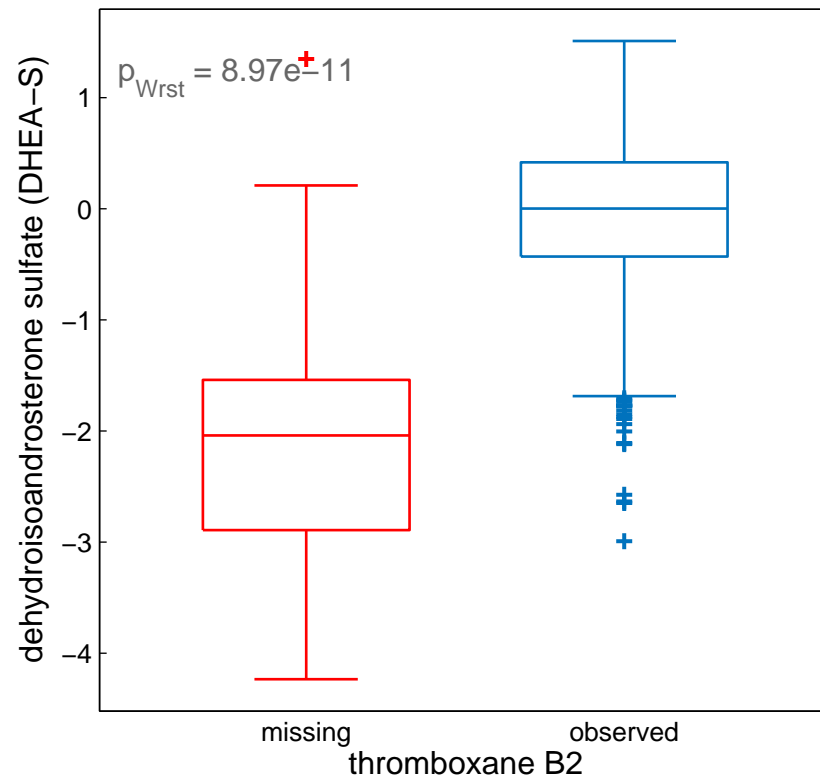

Missing values of thymol sulfate  
in X-12847

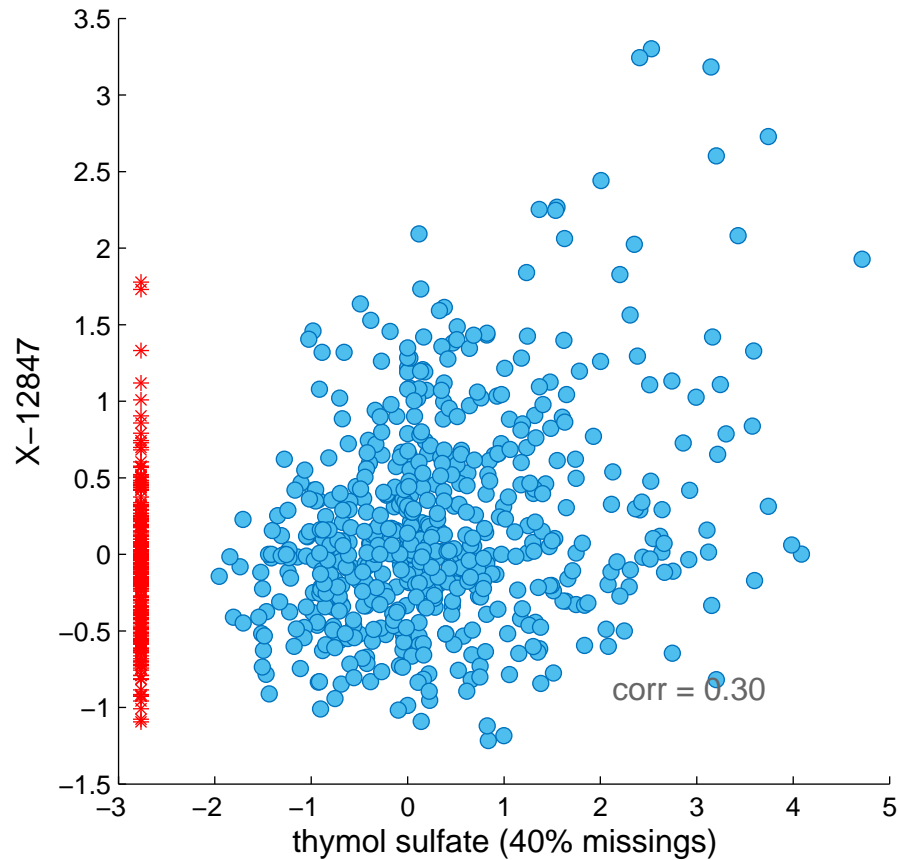

Concentrations of X-12847 in  
missing and observed thymol sulfate

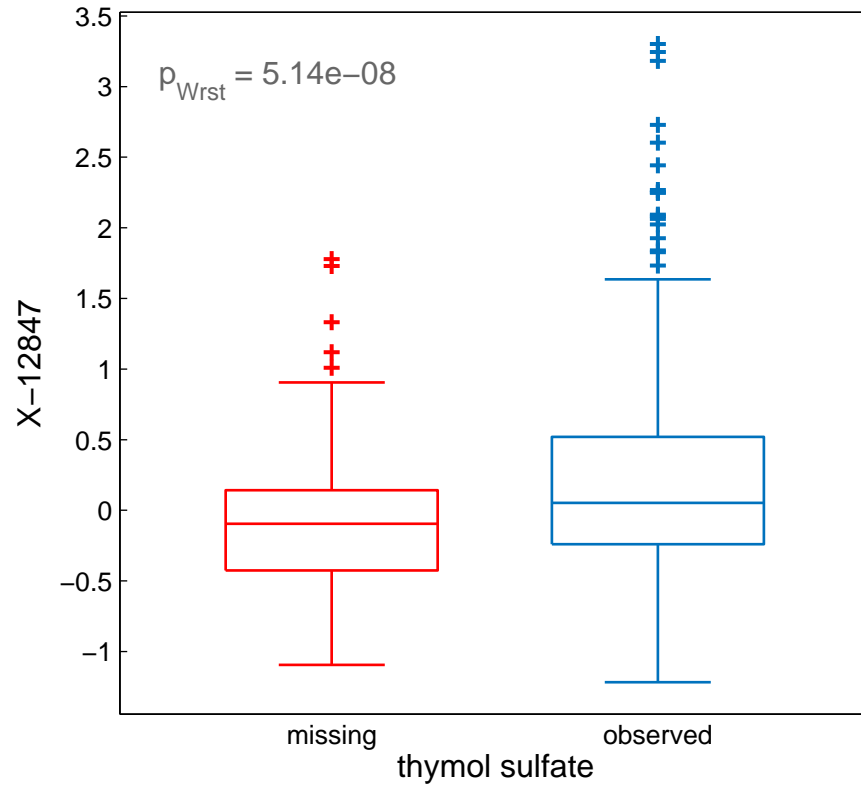



Missing values of trigonelline (N'-methylnicotinate) in X-12039

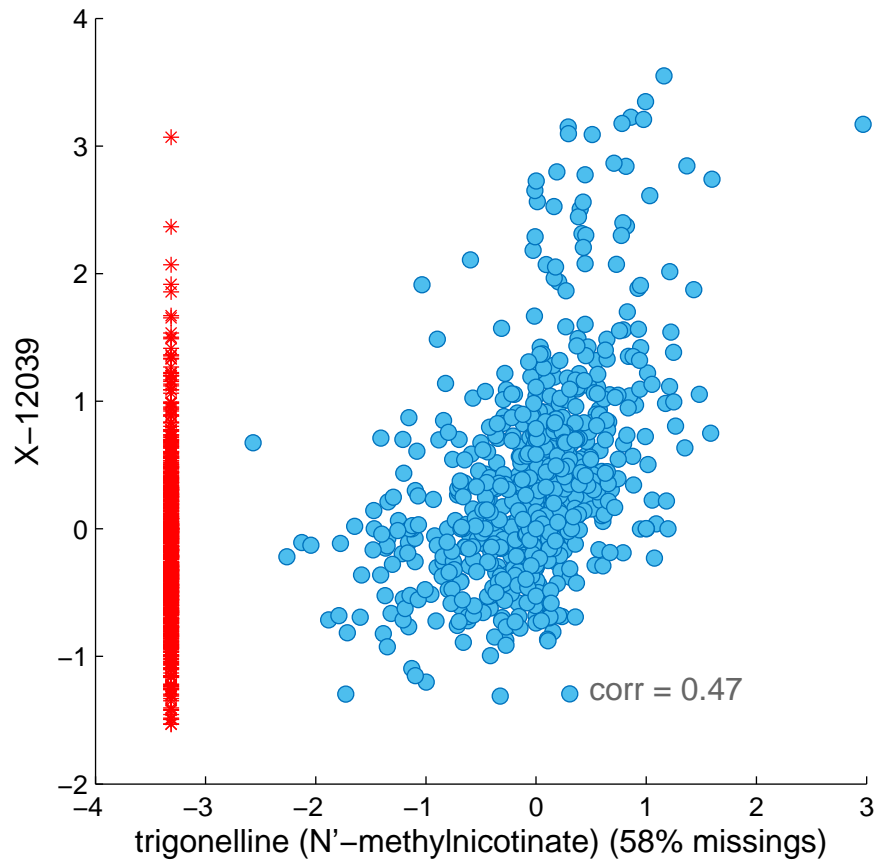

Concentrations of X-12039 in missing and observed trigonelline (N'-methylnicotinate)

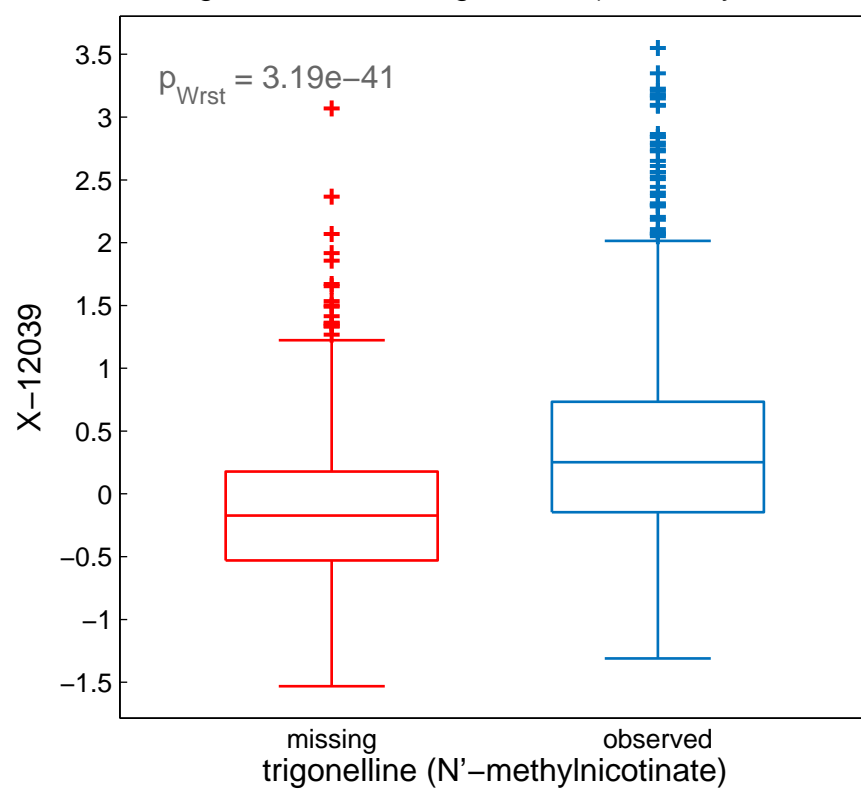

Missing values of undecanoate (11:0)  
in pelargonate (9:0)

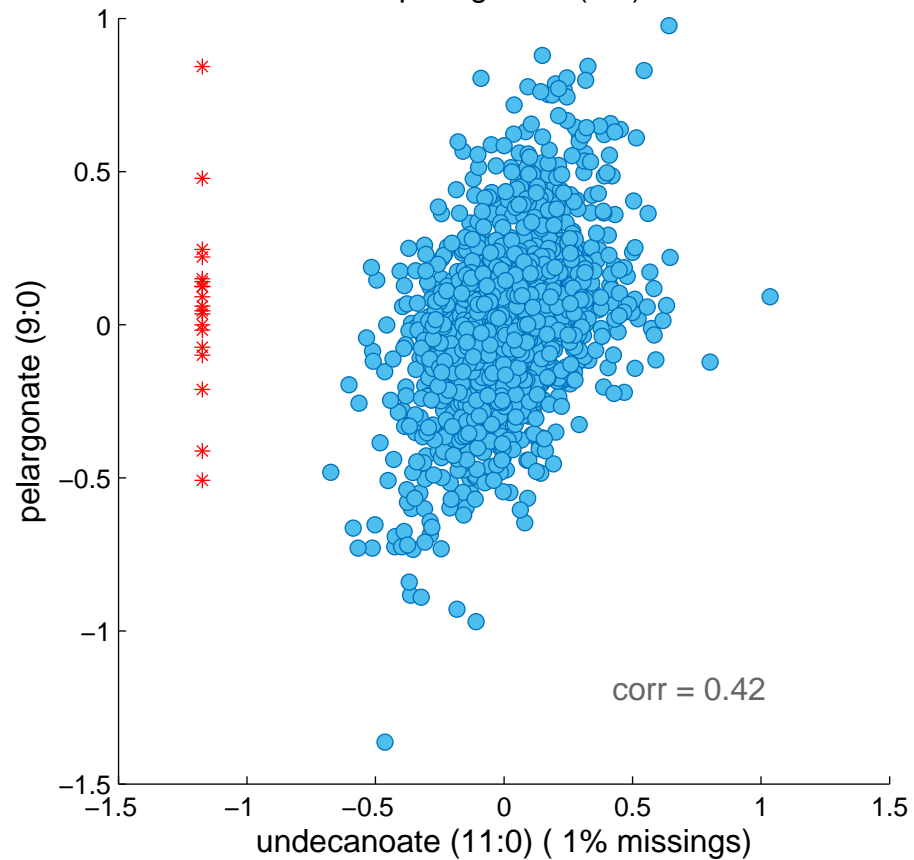

Concentrations of pelargonate (9:0) in  
missing and observed undecanoate (11:0)

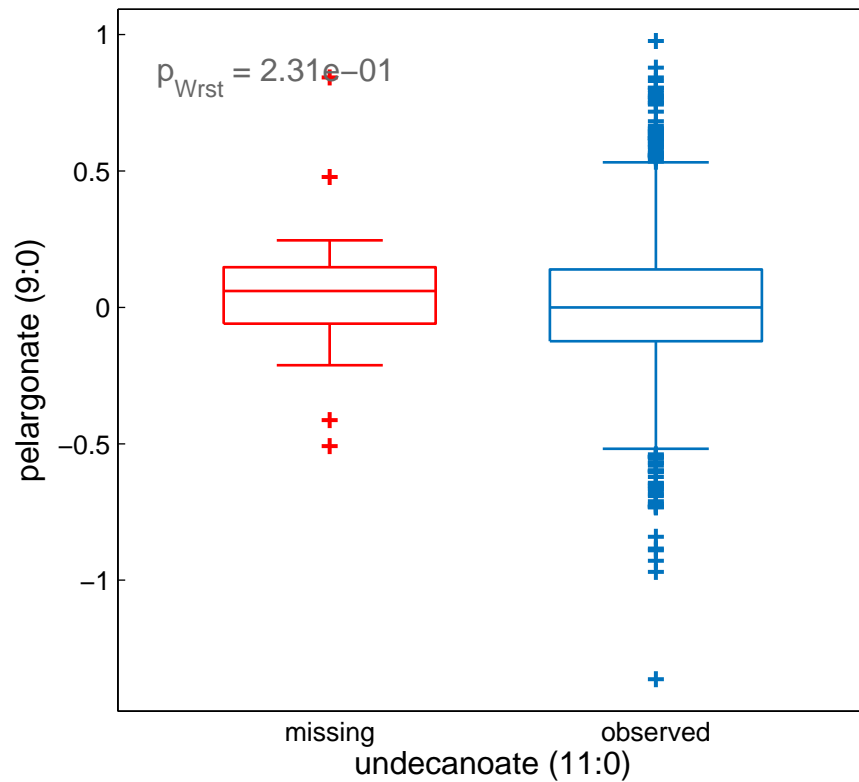

Missing values of ursodeoxycholate  
in deoxycholate

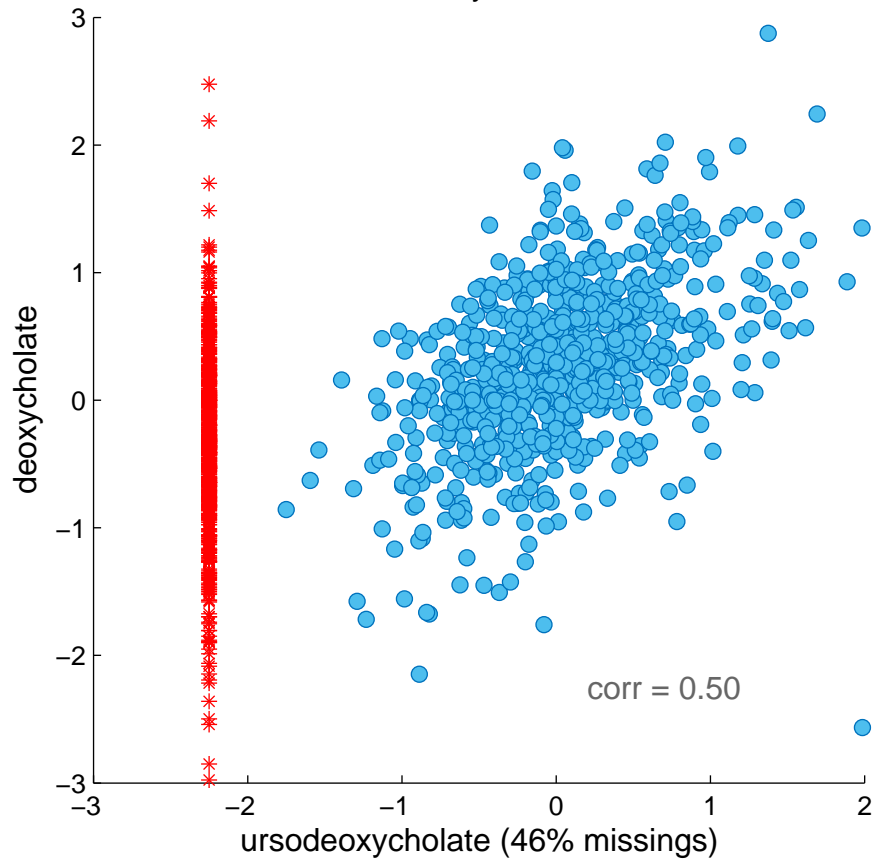

Concentrations of deoxycholate in  
missing and observed ursodeoxycholate

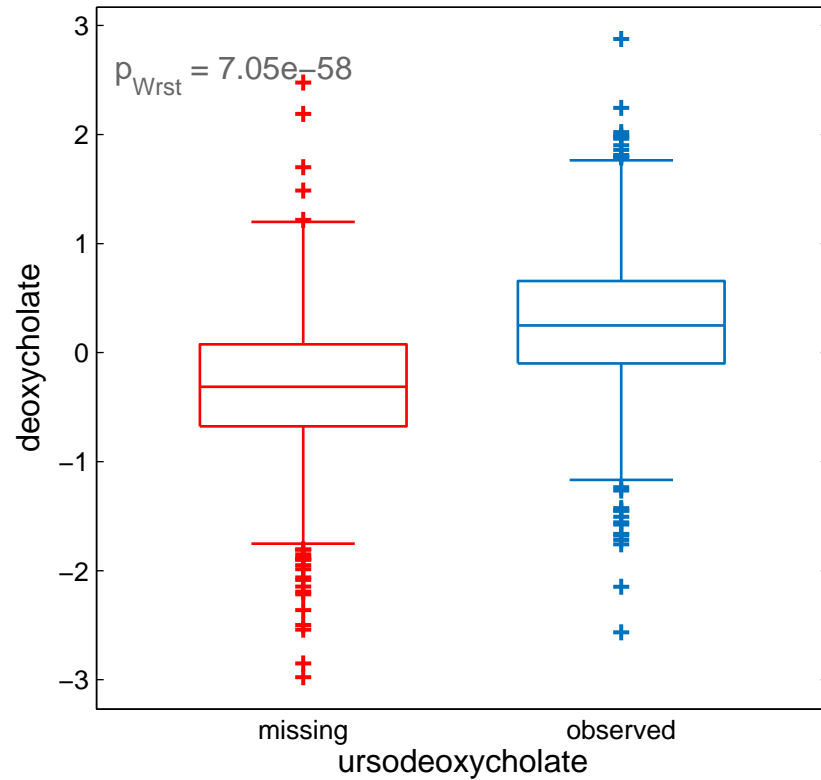

Missing values of valerate  
in caproate (6:0)

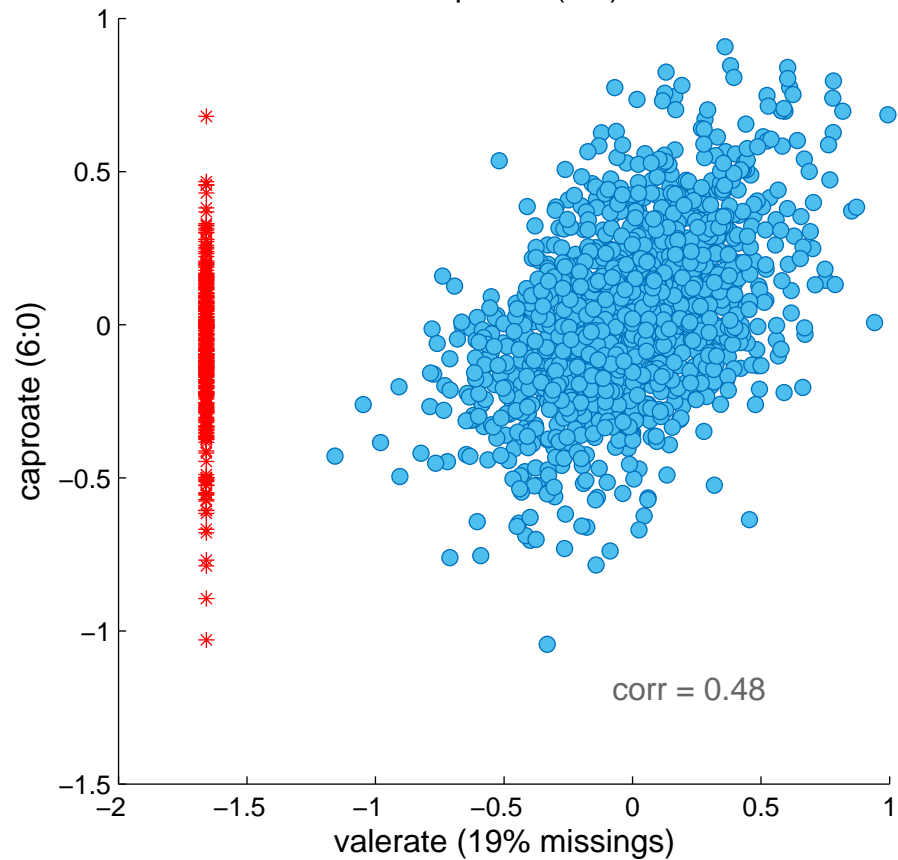

Concentrations of caproate (6:0) in  
missing and observed valerate

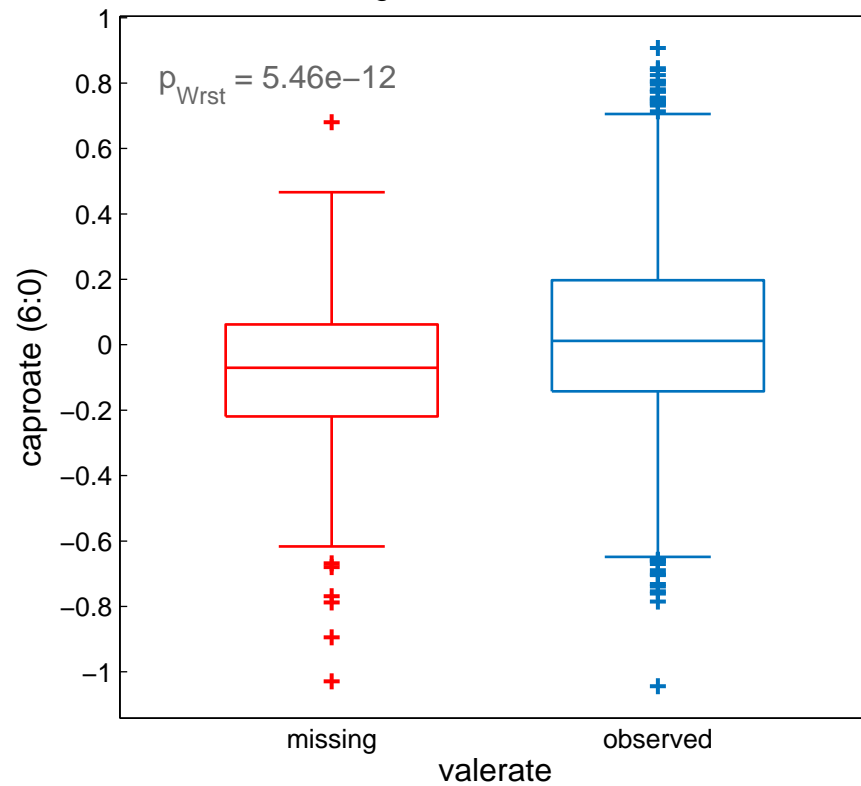

Missing values of xanthine  
in X-11422

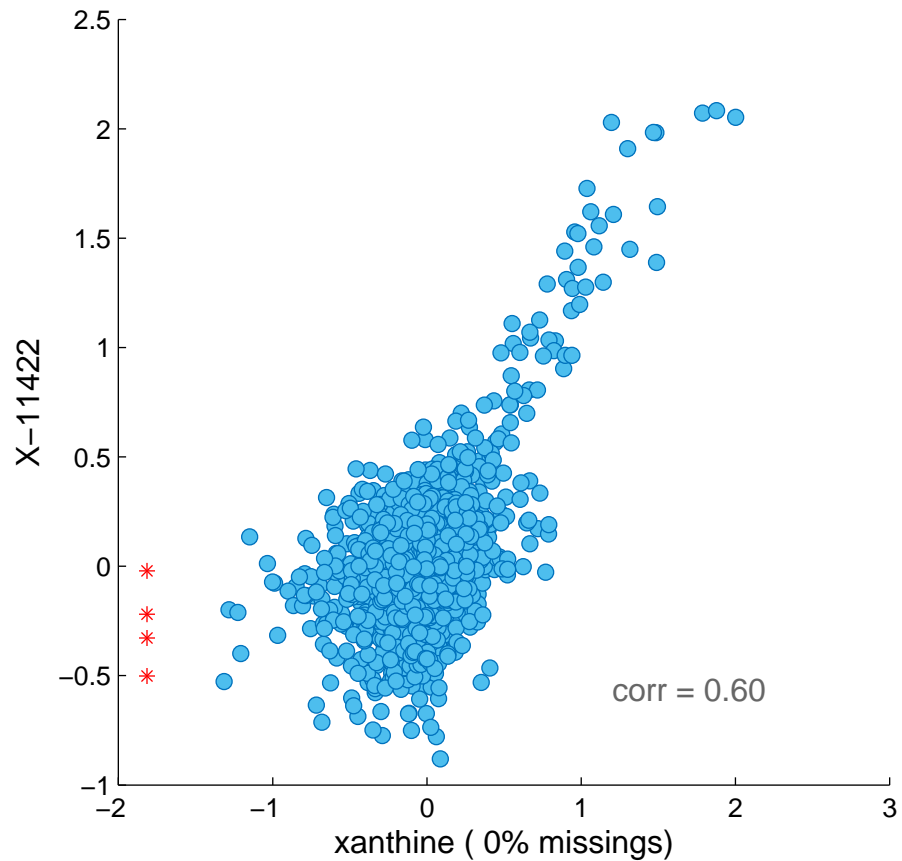

Concentrations of X-11422 in  
missing and observed xanthine

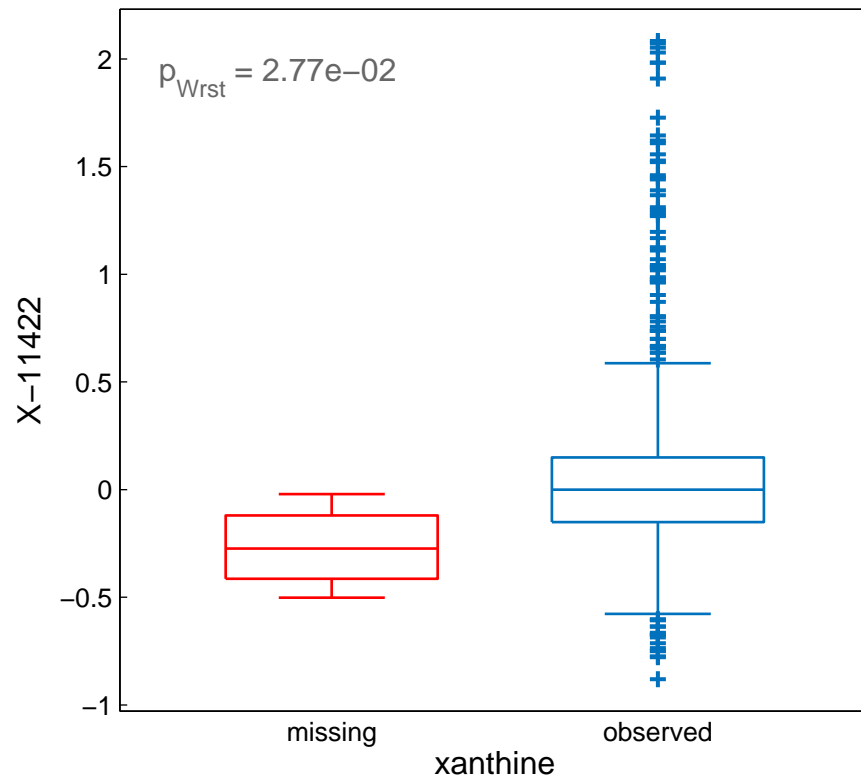

Missing values of 1;6-anhydroglucose  
in X-12116

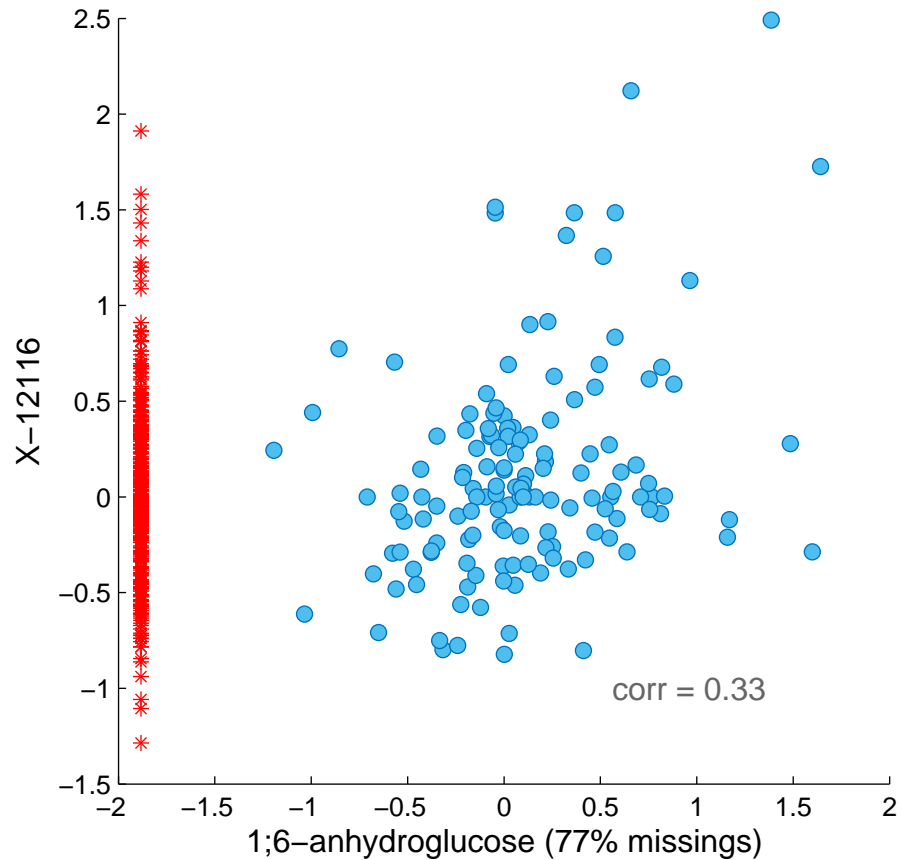

Concentrations of X-12116 in  
missing and observed 1;6-anhydroglucose

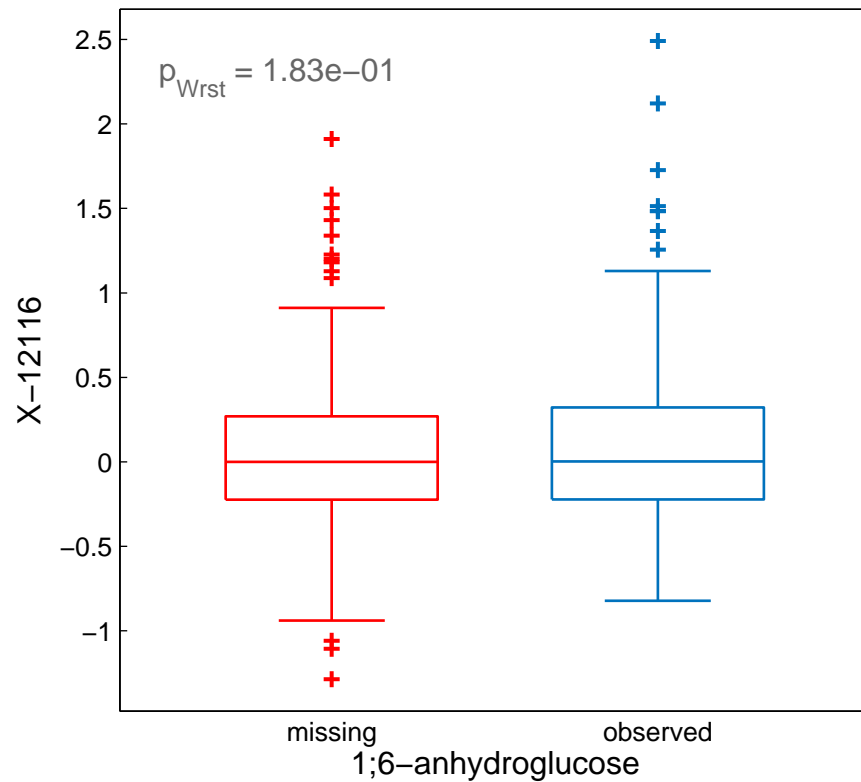

Missing values of X-01911  
in piperine

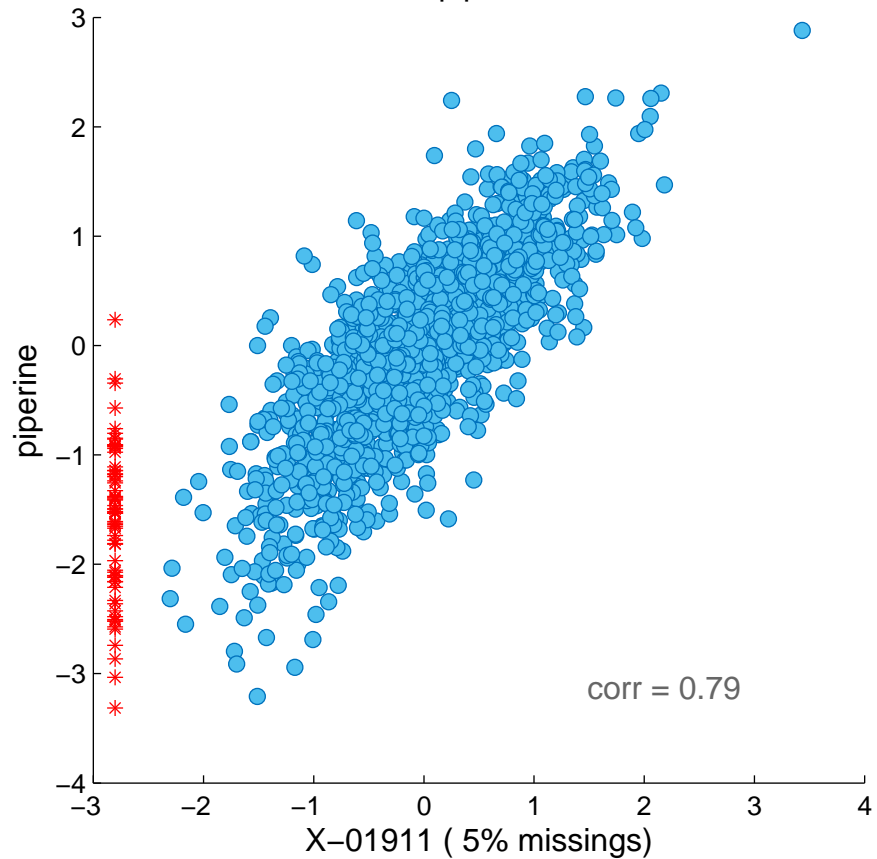

Concentrations of piperine in  
missing and observed X-01911

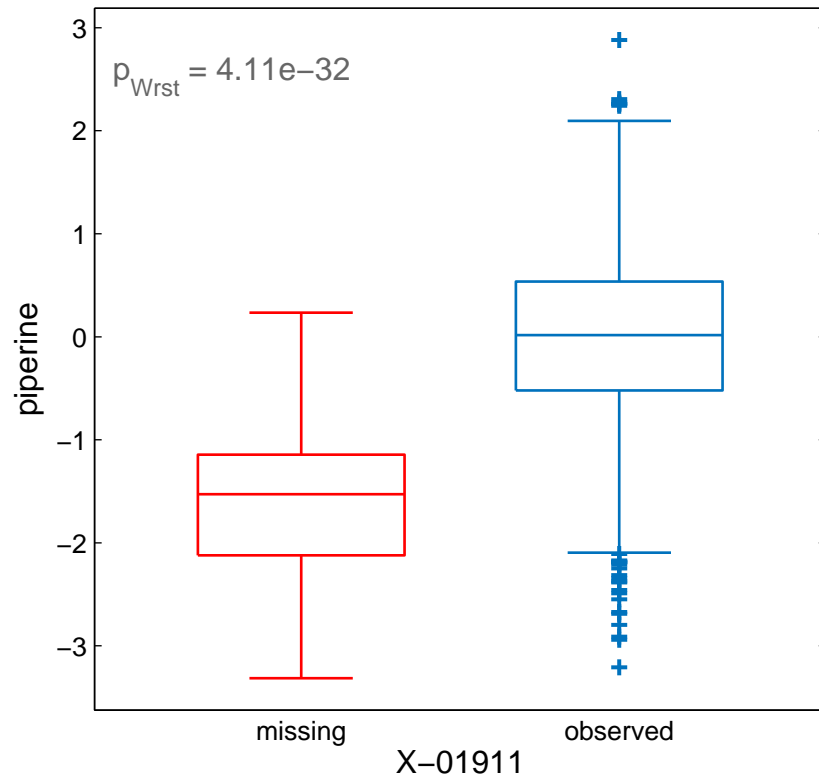

Missing values of X-02269  
in X-11469

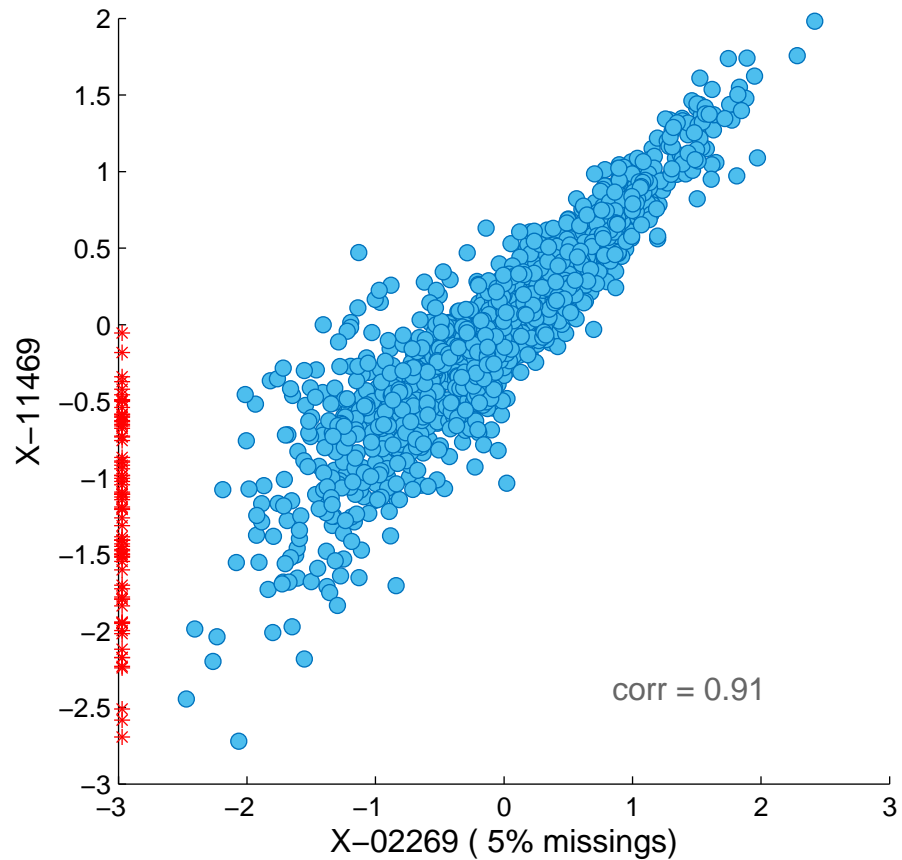

Concentrations of X-11469 in  
missing and observed X-02269

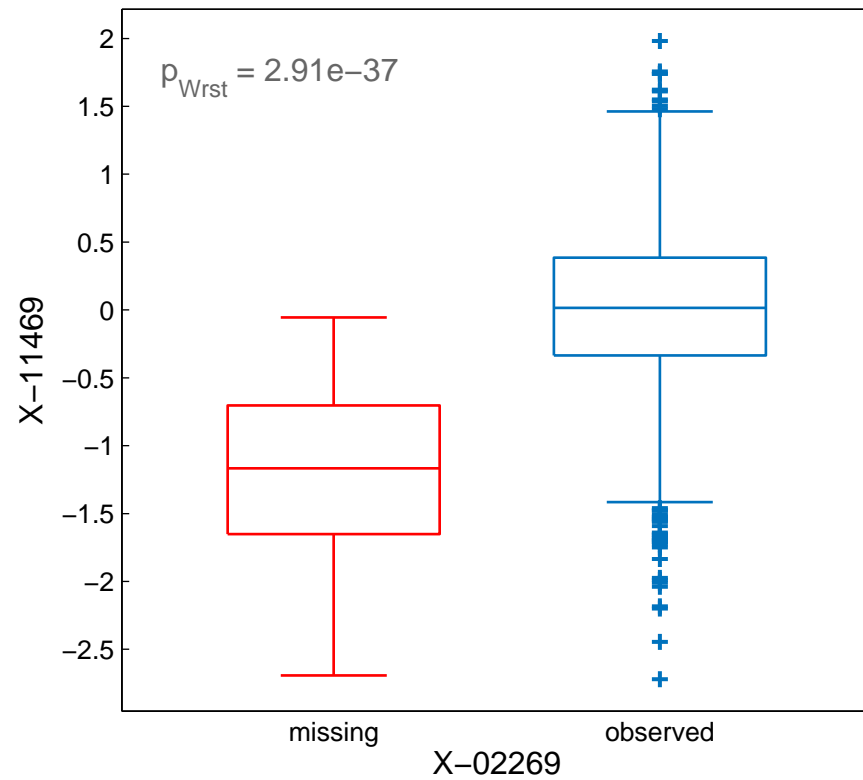



Missing values of X-03003  
in serine

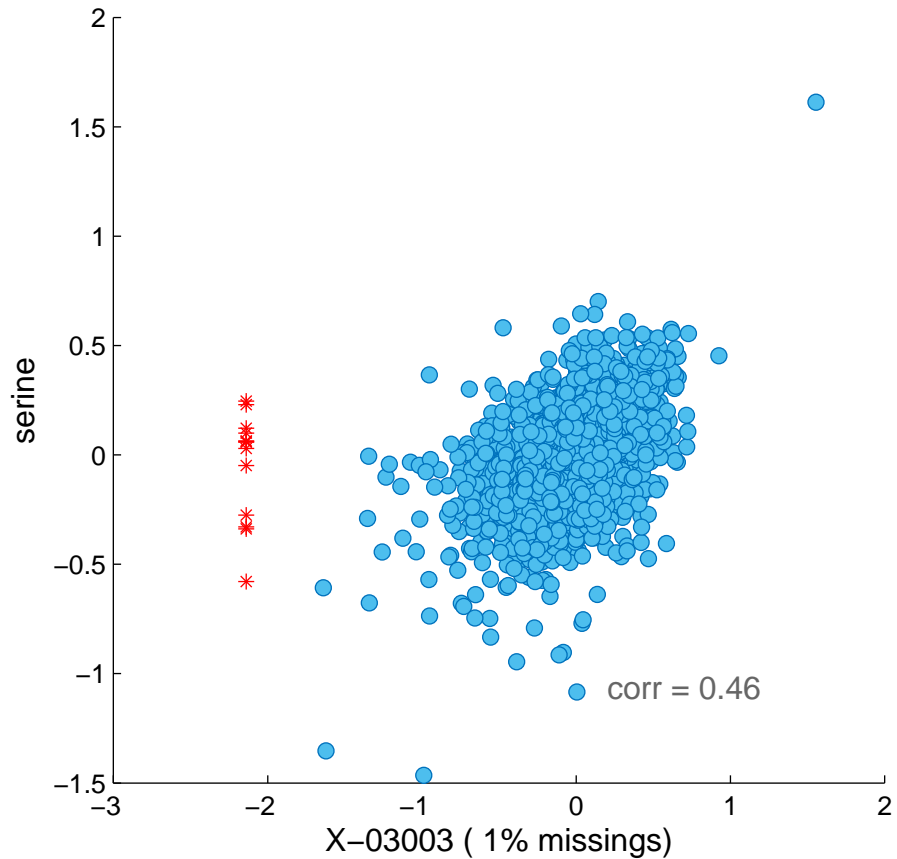

Concentrations of serine in  
missing and observed X-03003

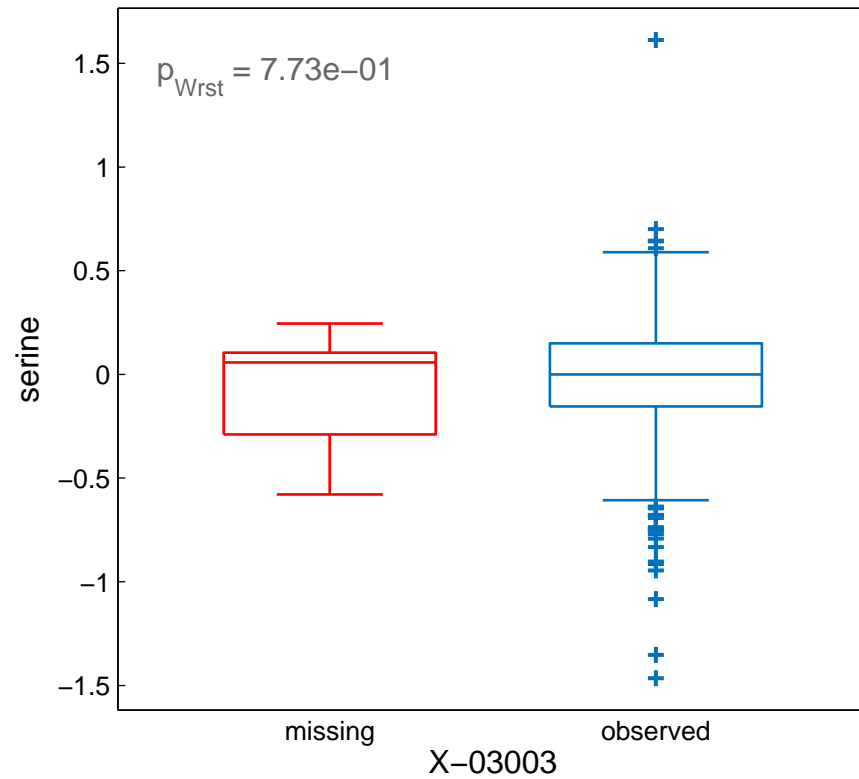

Missing values of X-03088  
in X-06267

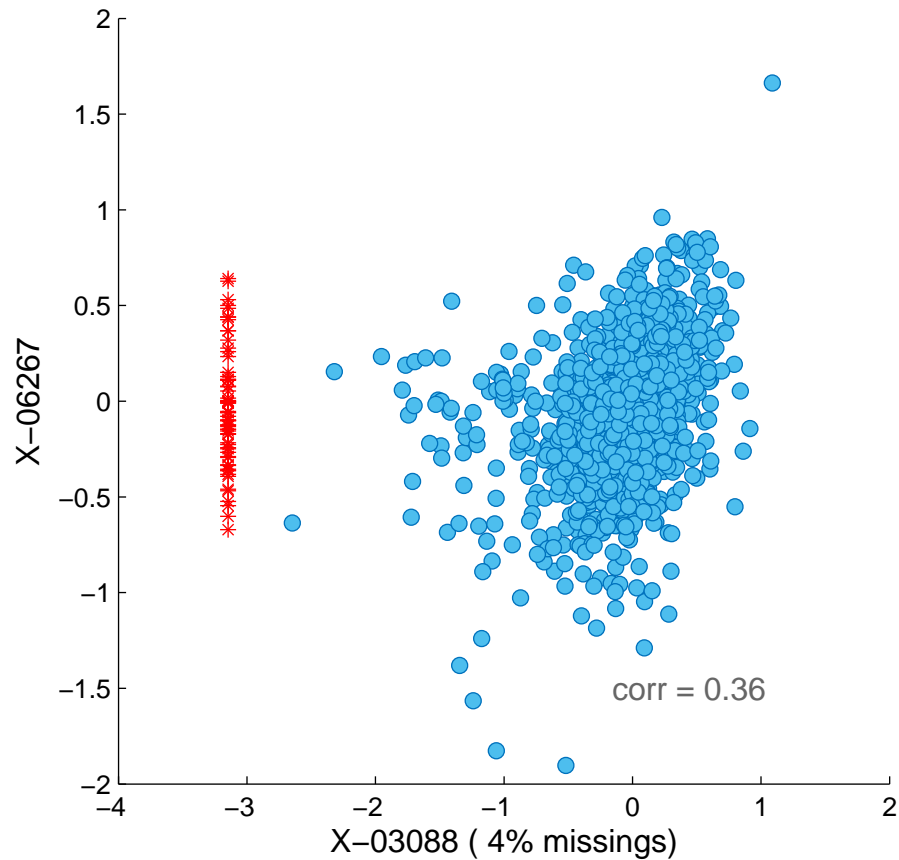

Concentrations of X-06267 in  
missing and observed X-03088

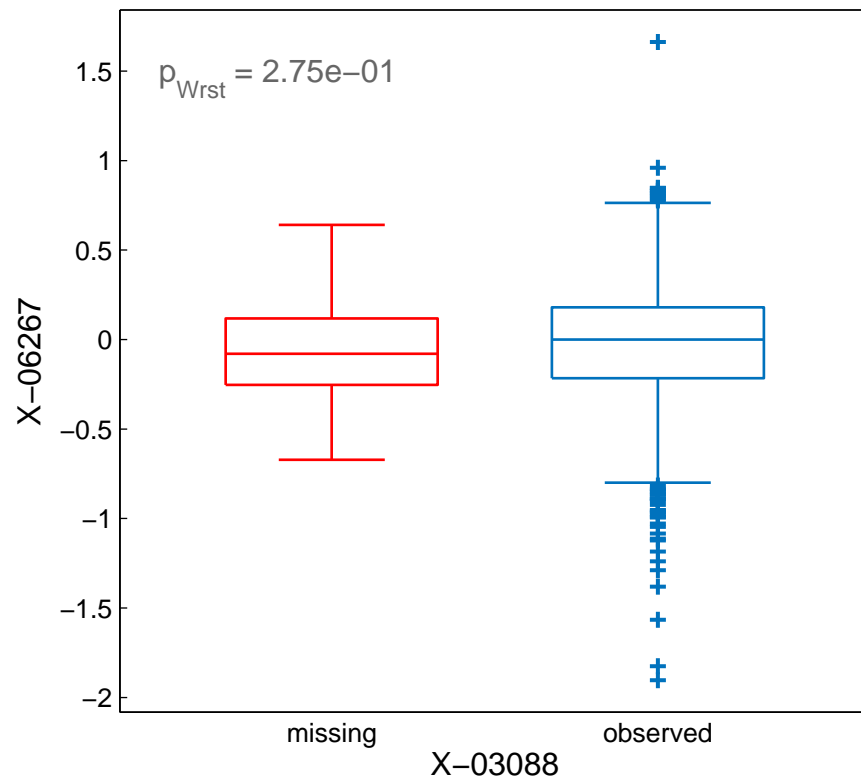

Missing values of X-03090  
in X-10675

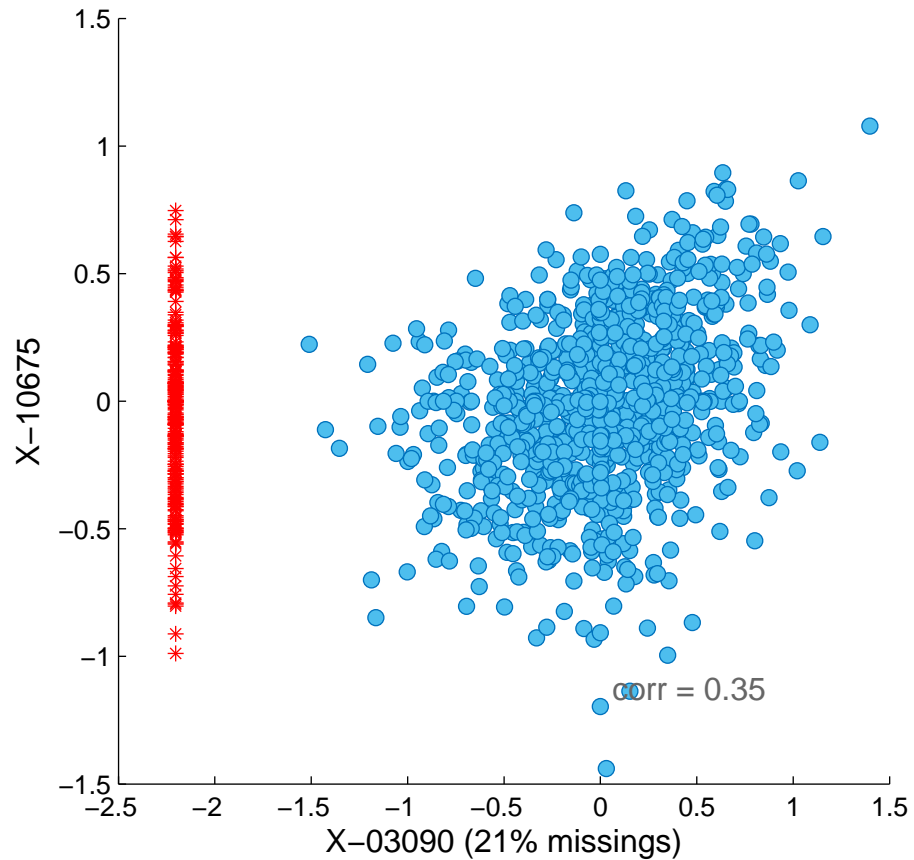

Concentrations of X-10675 in  
missing and observed X-03090

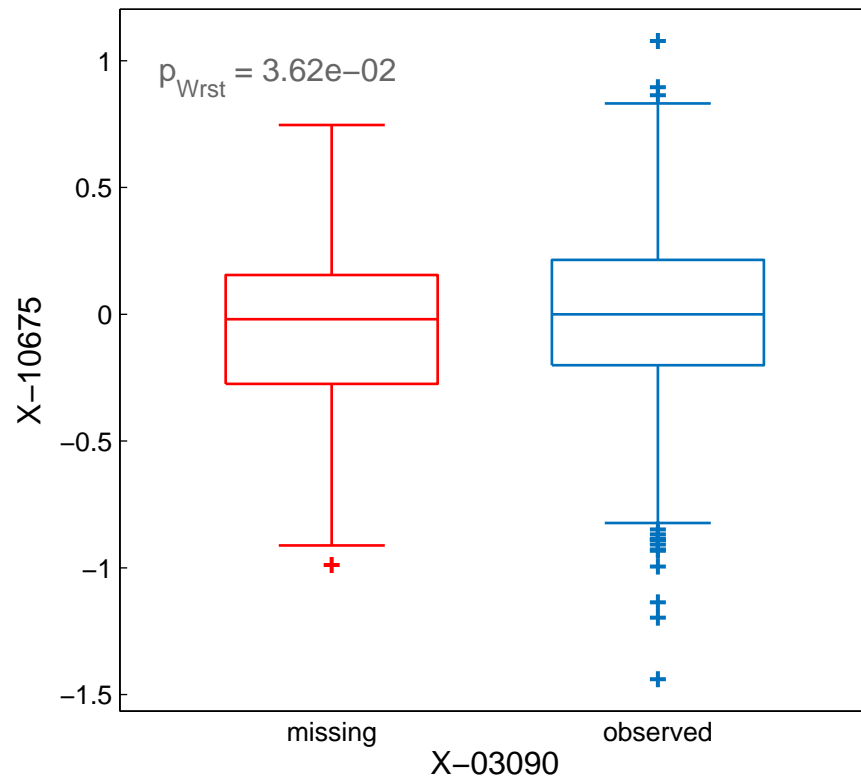

Missing values of X-04357  
in X-12786

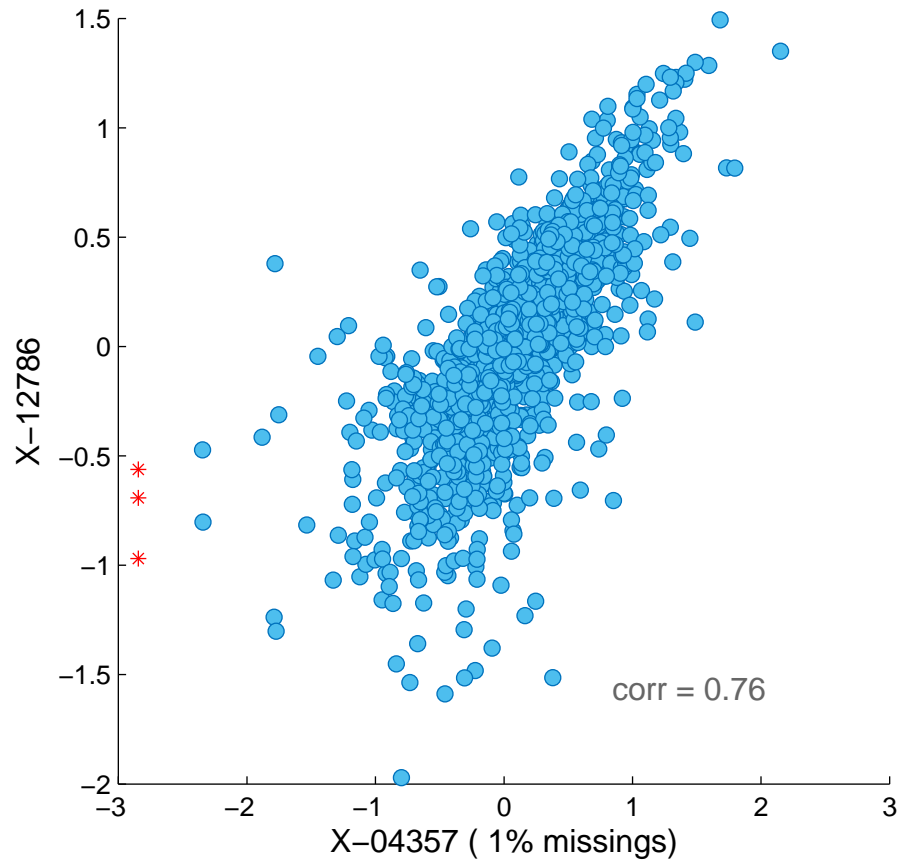

Concentrations of X-12786 in  
missing and observed X-04357

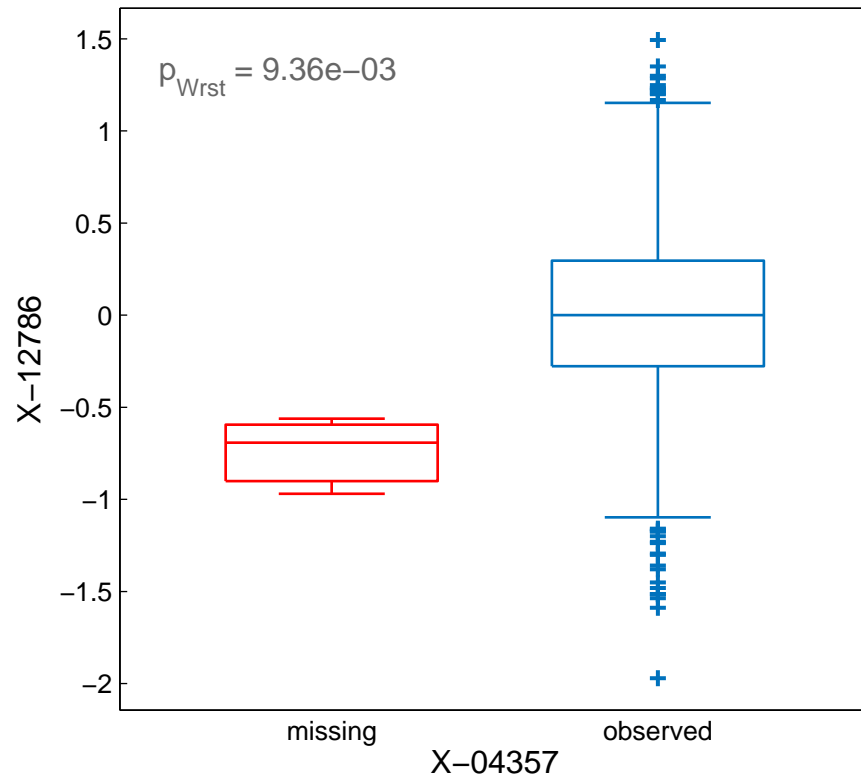

Missing values of 1;7-dimethylurate  
in paraxanthine

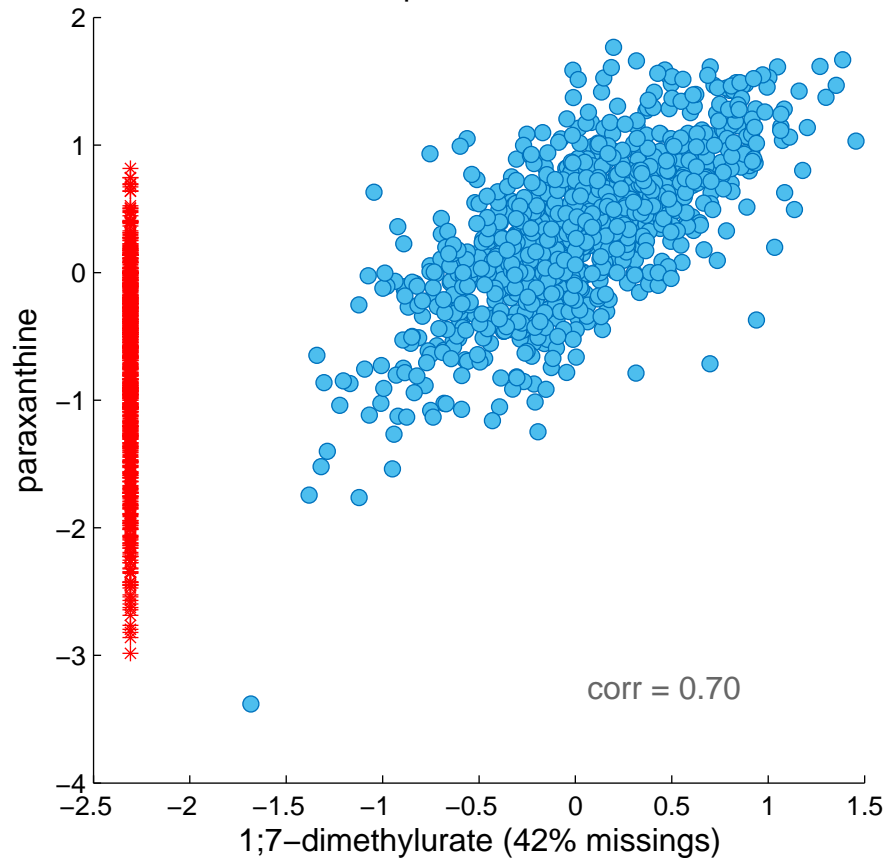

Concentrations of paraxanthine in  
missing and observed 1;7-dimethylurate

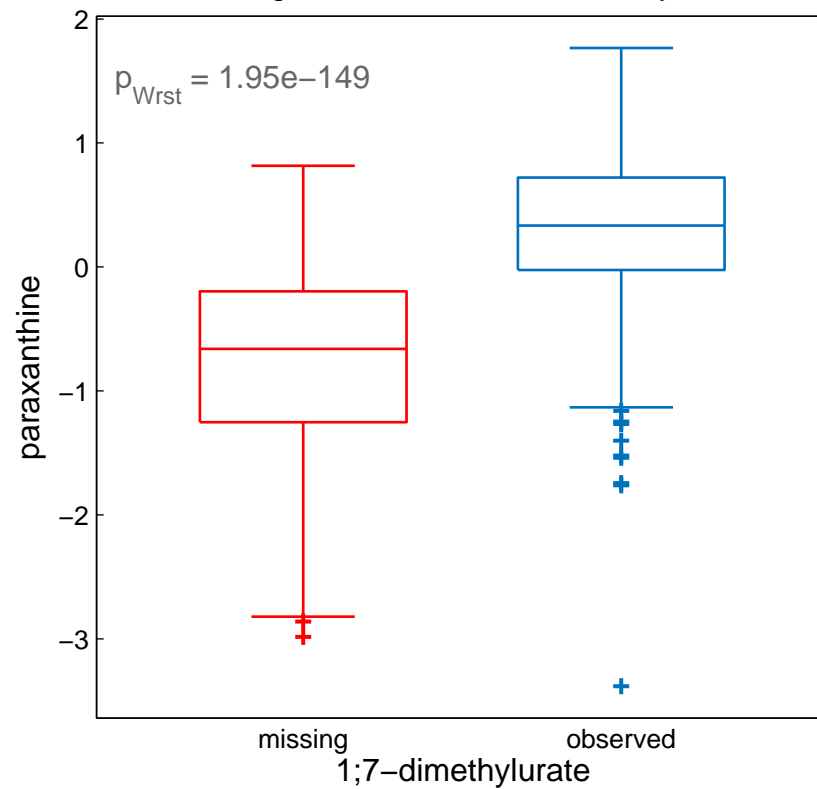

Missing values of X-04494  
in X-09706

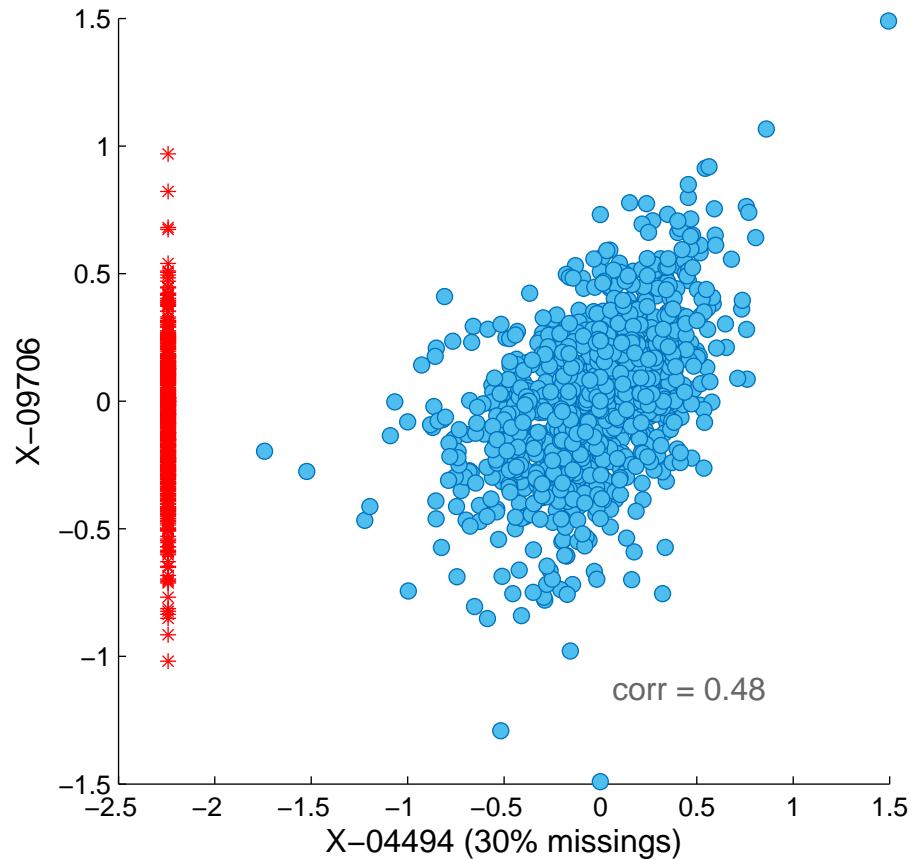

Concentrations of X-09706 in  
missing and observed X-04494

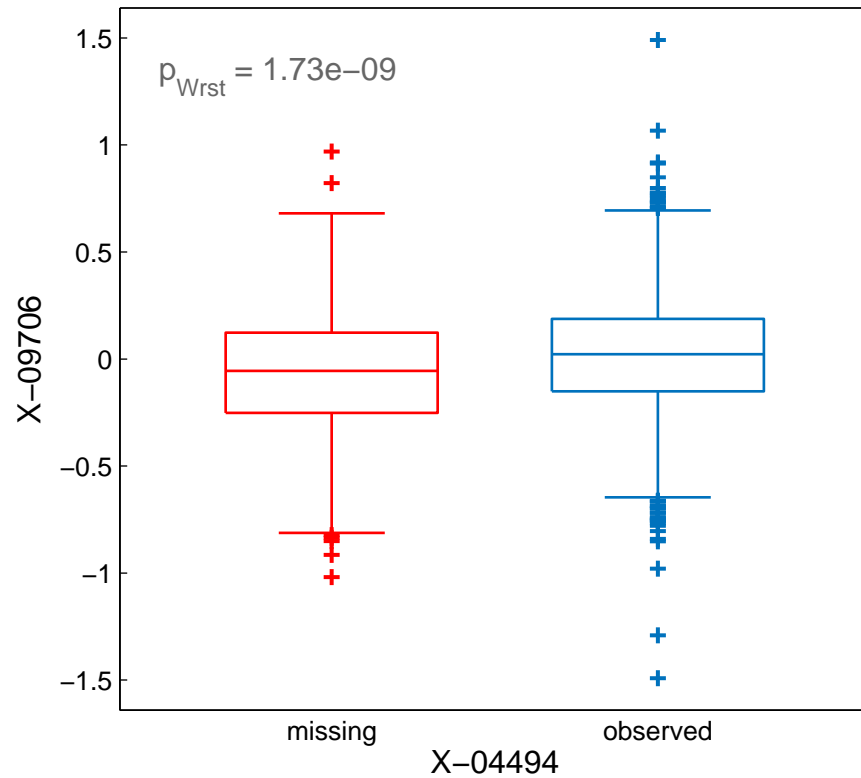

Missing values of X-04495  
in X-12244

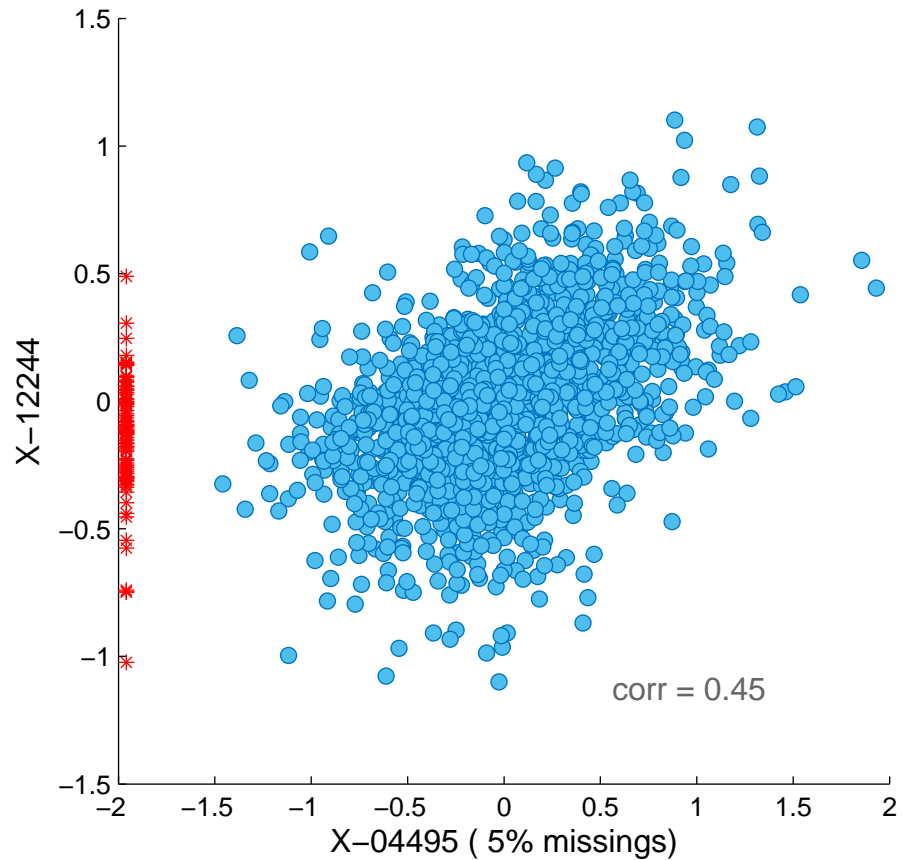

Concentrations of X-12244 in  
missing and observed X-04495

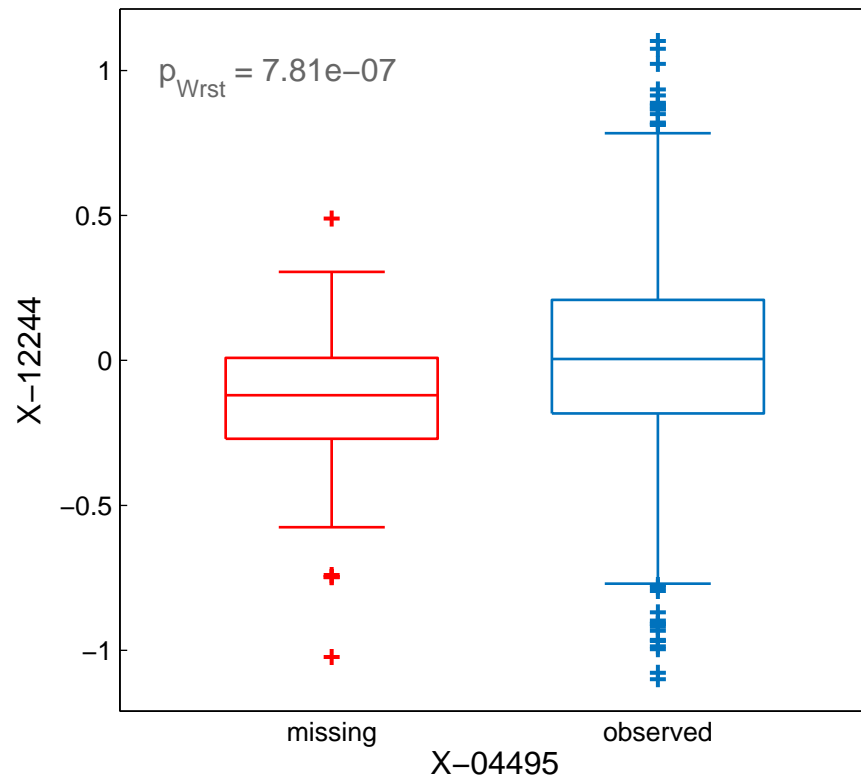

Missing values of X-04498  
in erythronate

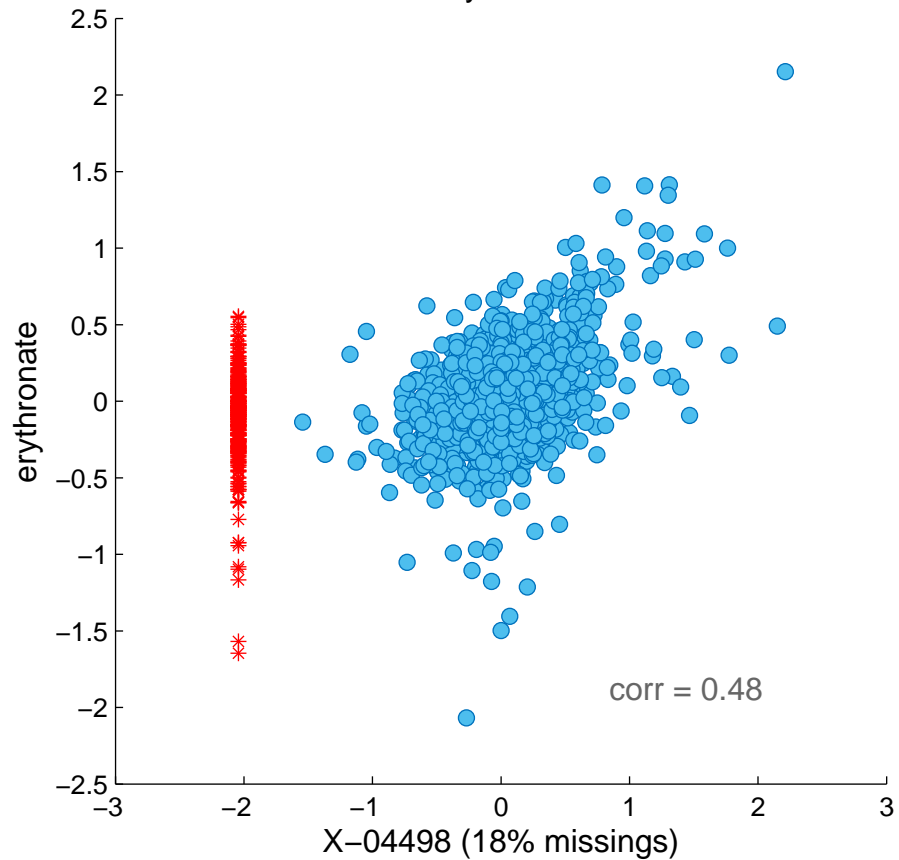

Concentrations of erythronate in  
missing and observed X-04498

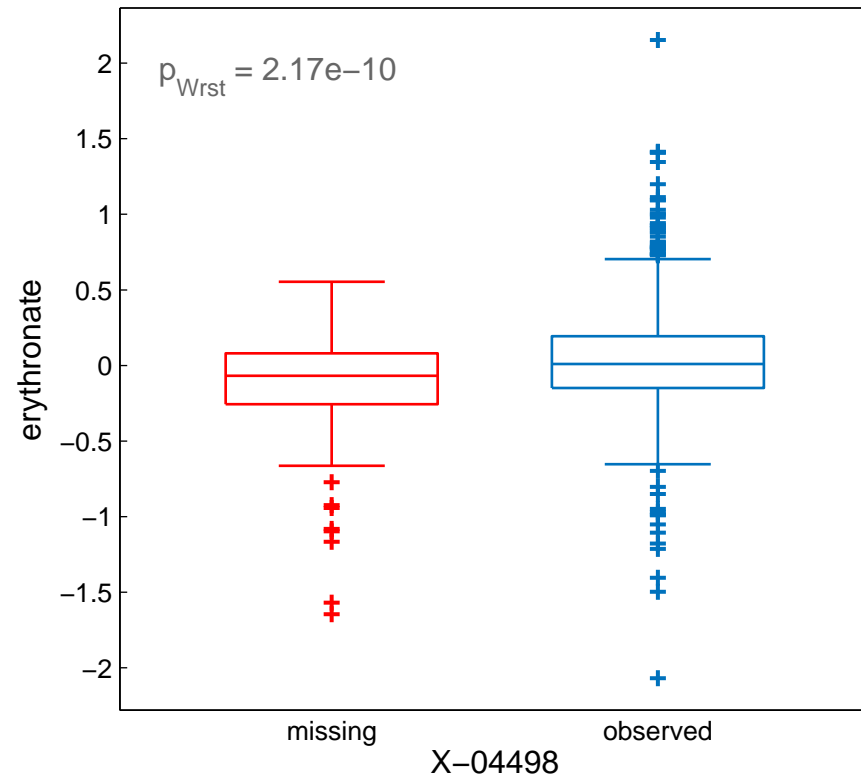



Missing values of X-04499  
in erythronate

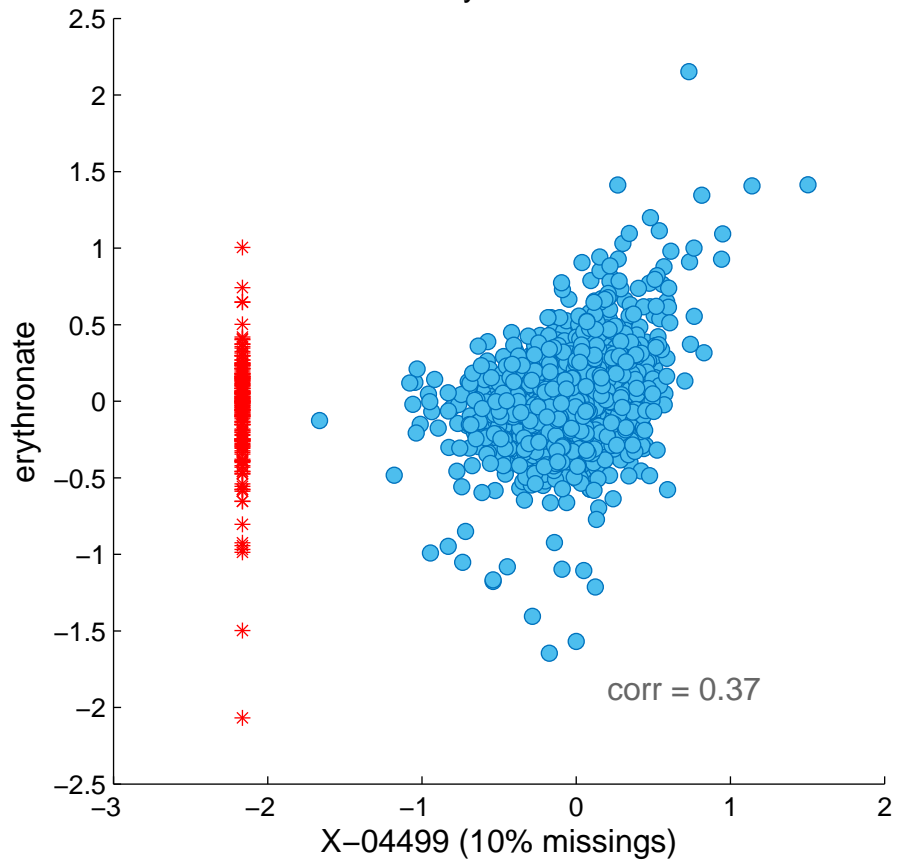

Concentrations of erythronate in  
missing and observed X-04499

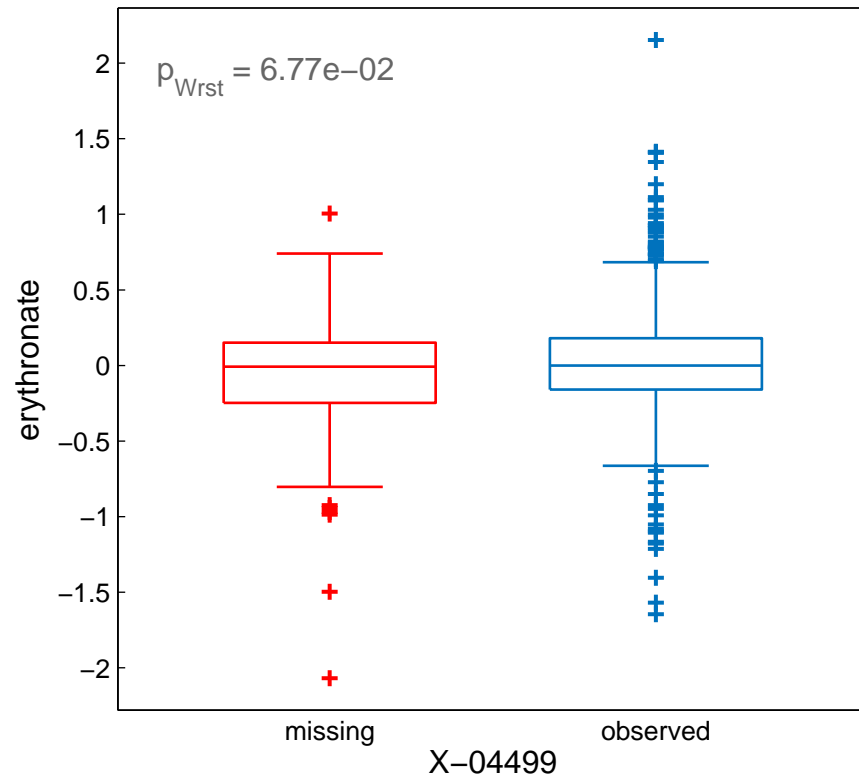

Missing values of X-04500  
in hydroquinone sulfate

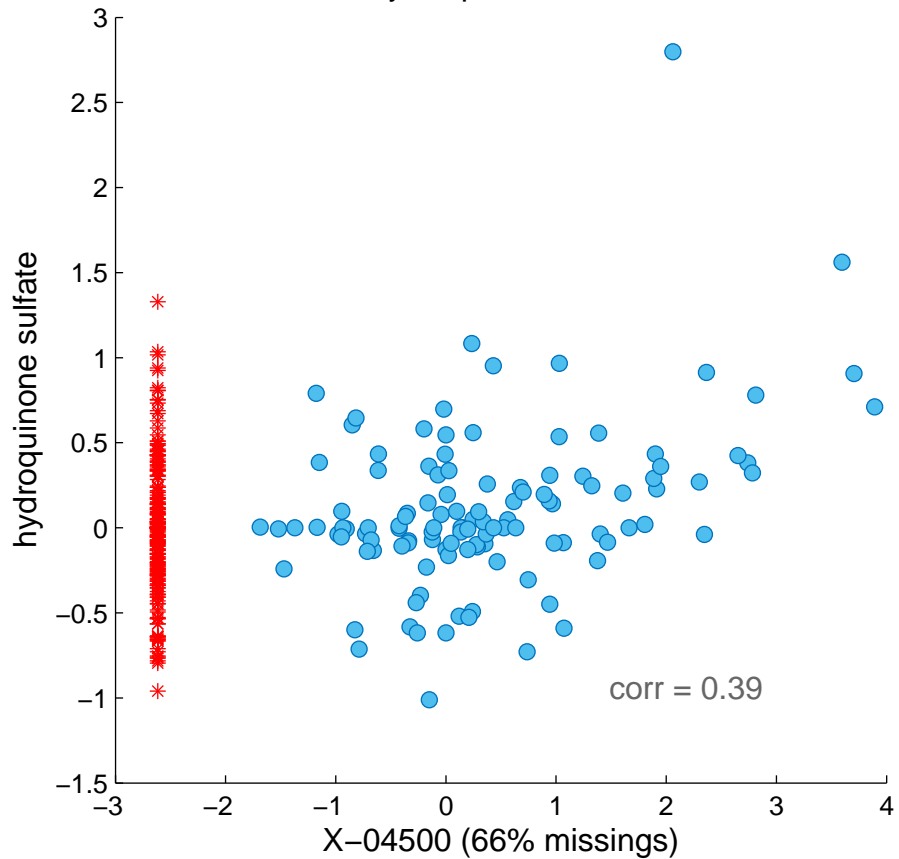

Concentrations of hydroquinone sulfate in  
missing and observed X-04500

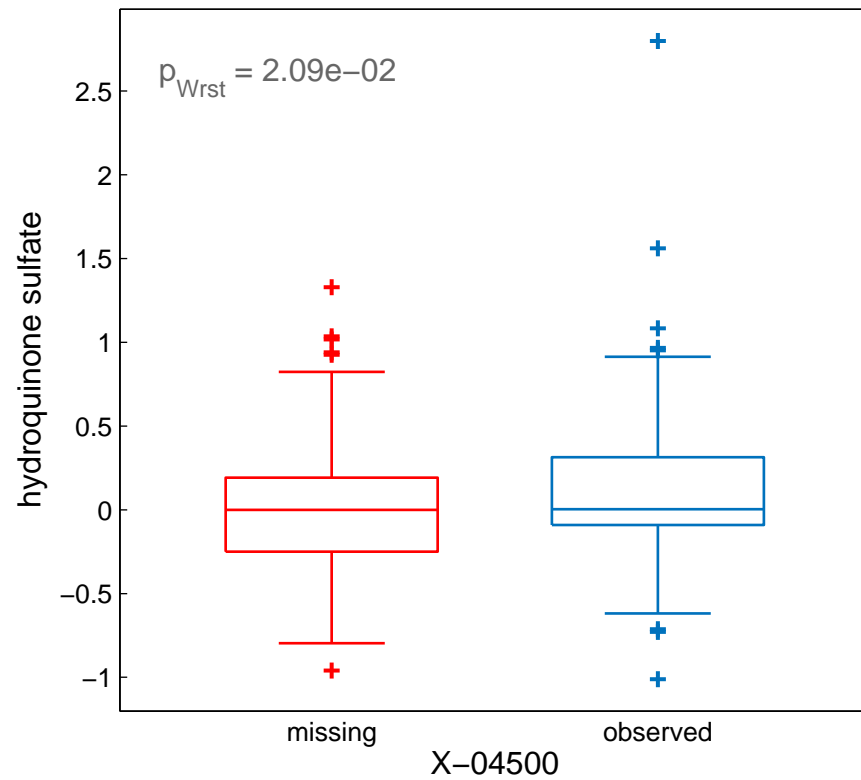

Missing values of chiro-*inositol* in stachydrine

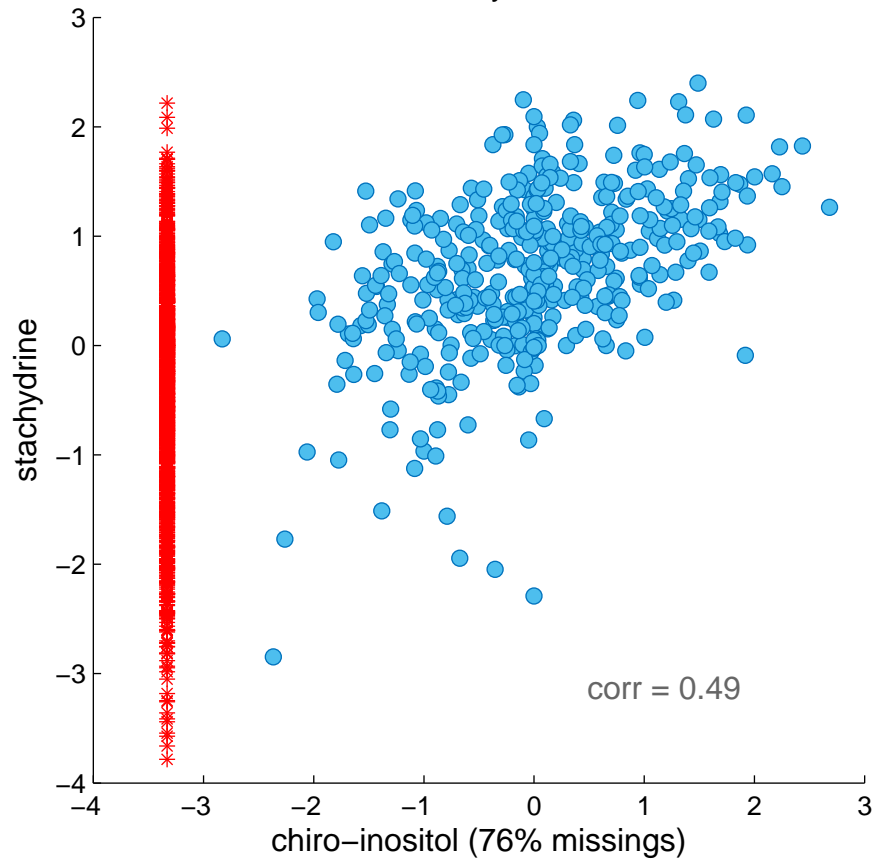

Concentrations of stachydrine in missing and observed chiro-*inositol*

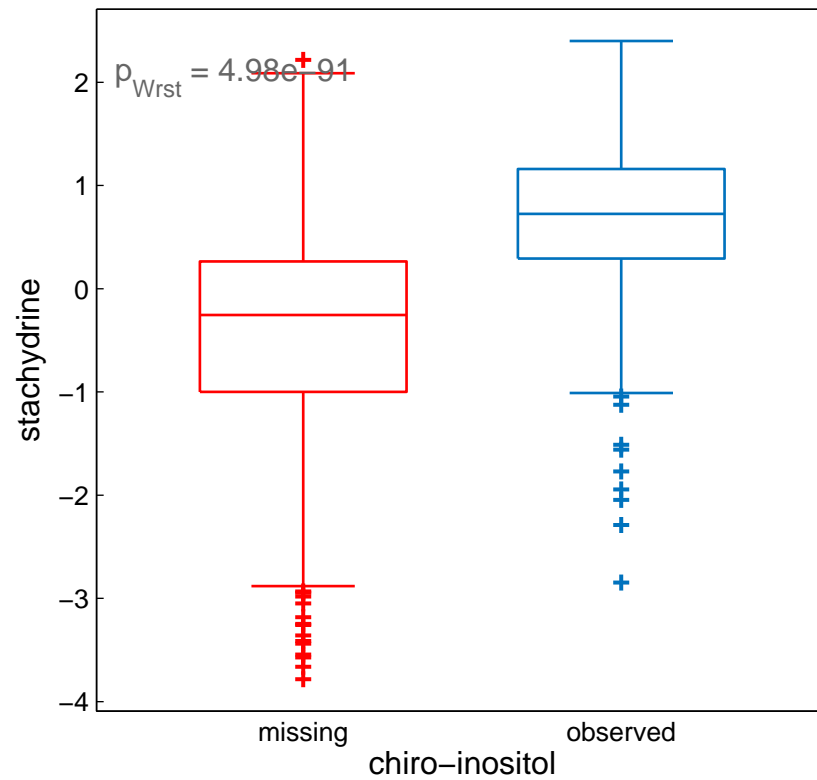

Missing values of X-05426  
in X-12039

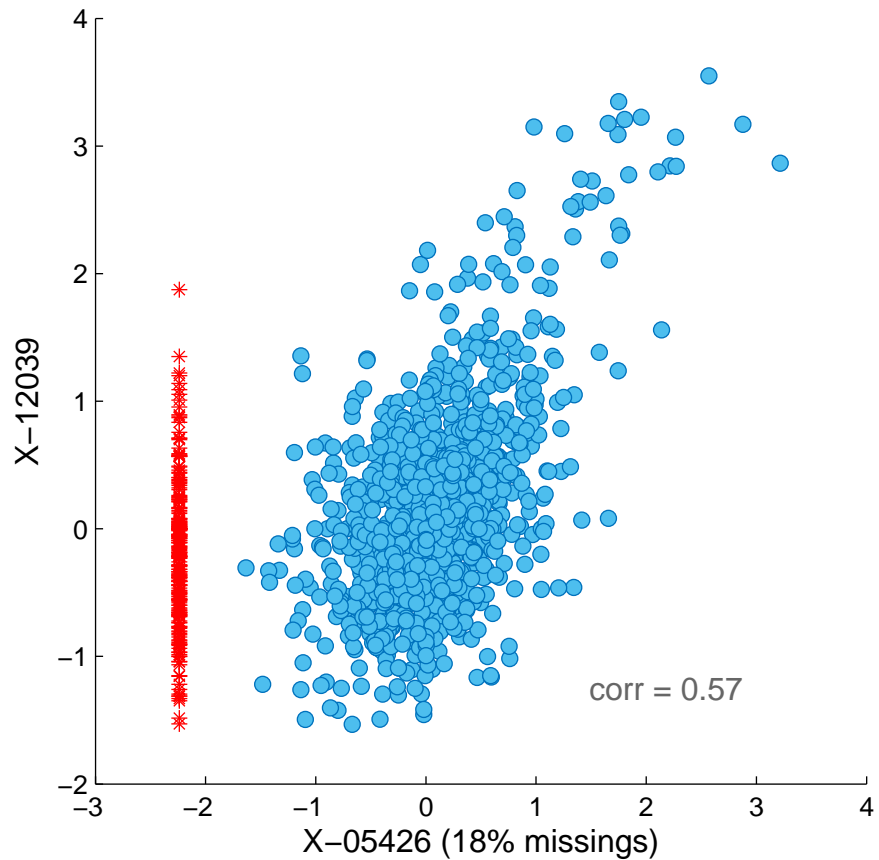

Concentrations of X-12039 in  
missing and observed X-05426

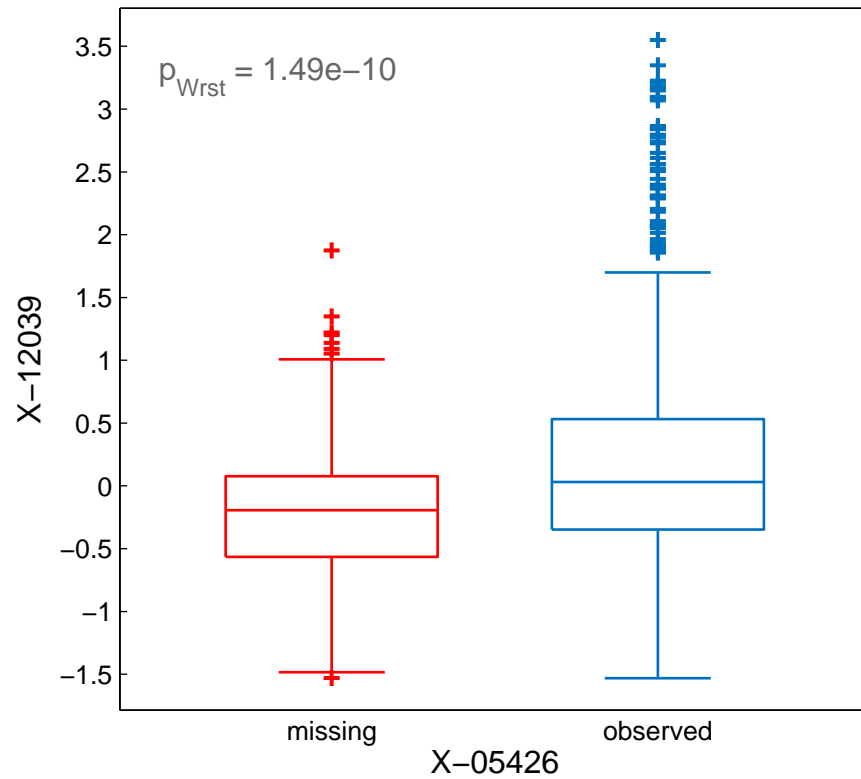

Missing values of X-05907  
in X-10395

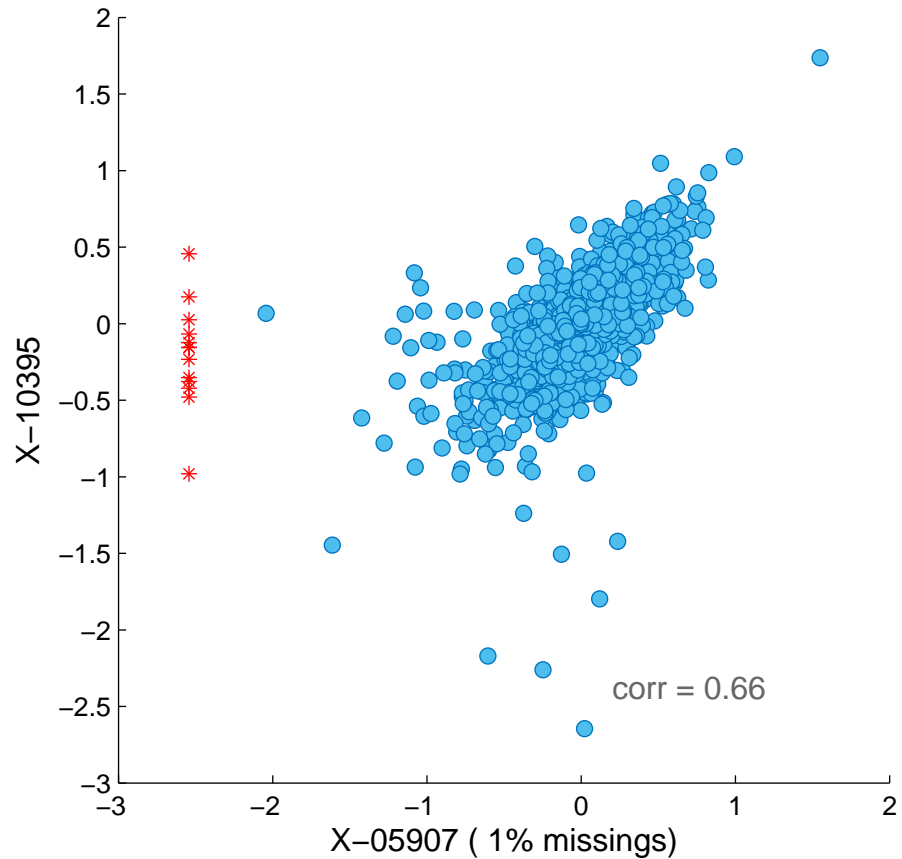

Concentrations of X-10395 in  
missing and observed X-05907

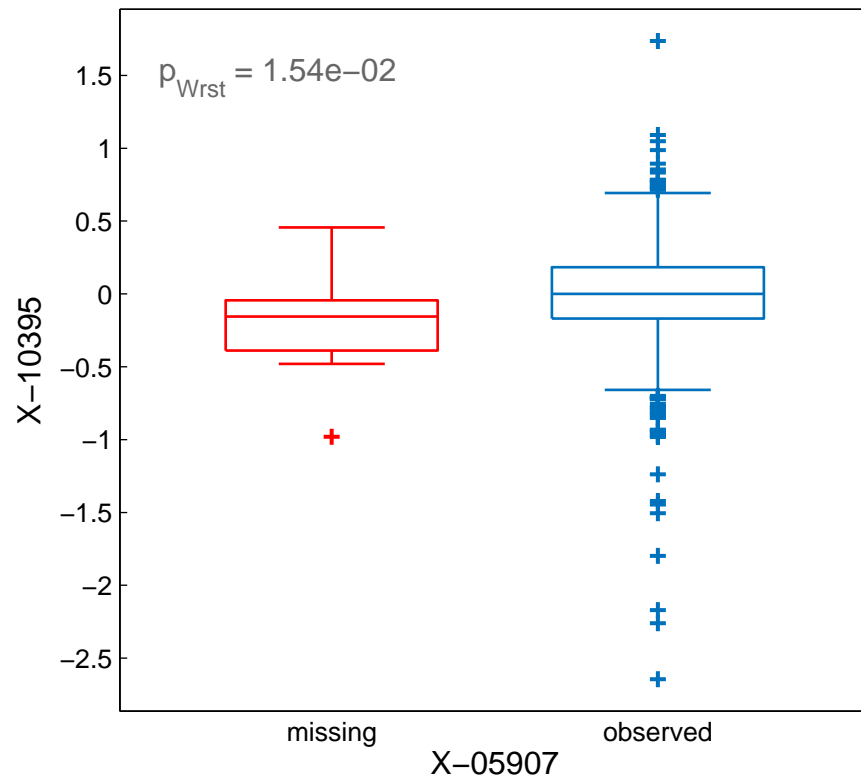

Missing values of X-06126  
in p-cresol sulfate

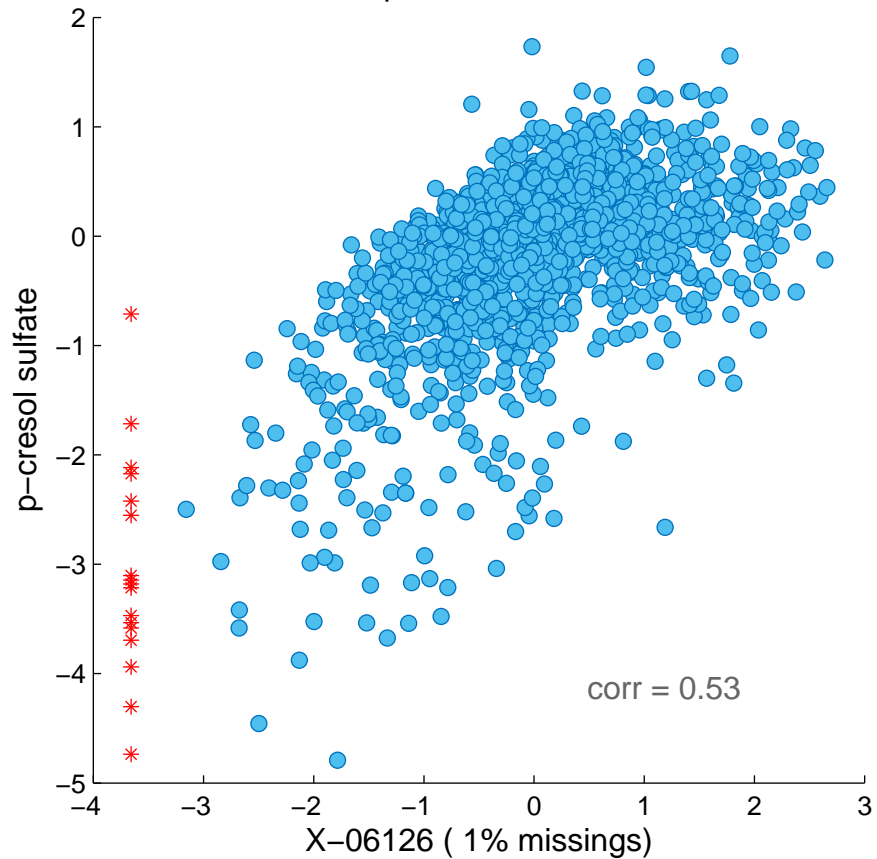

Concentrations of p-cresol sulfate in  
missing and observed X-06126

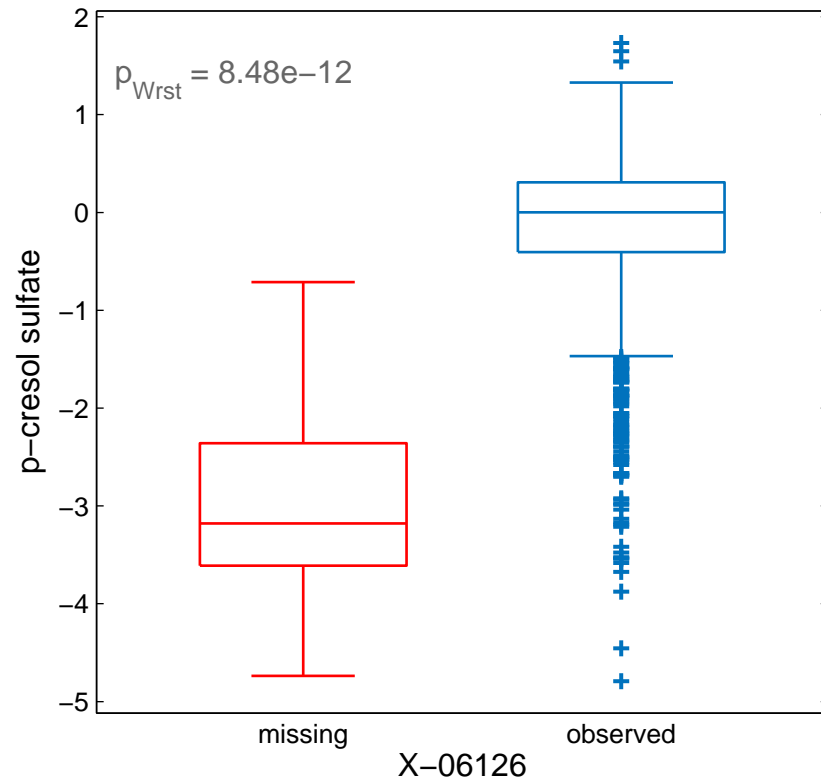

Missing values of 1–arachidonoylglycerophosphoinositol  
in 1–stearoylglycerophosphoinositol

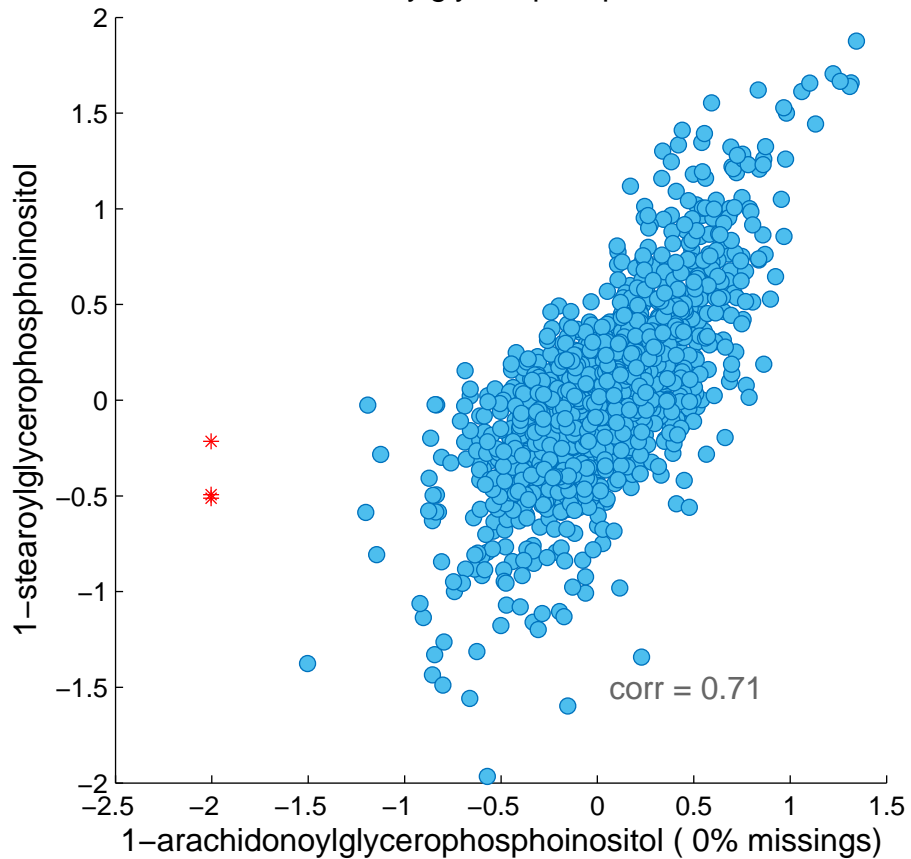

Concentrations of 1–stearoylglycerophosphoinositol in  
missing and observed 1–arachidonoylglycerophosphoinositol

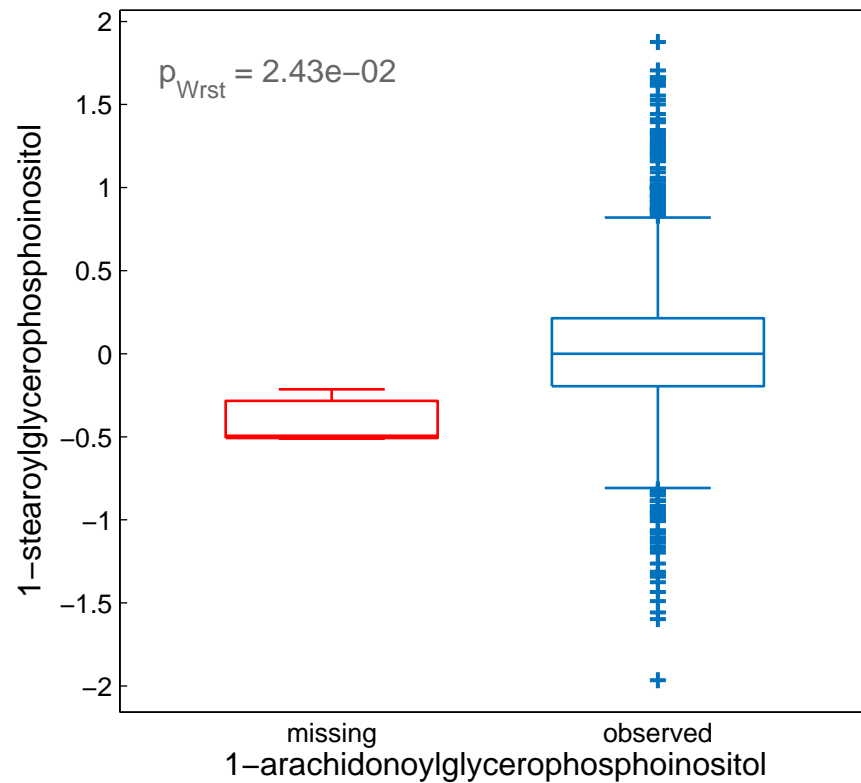

Missing values of X-06226  
in X-05907

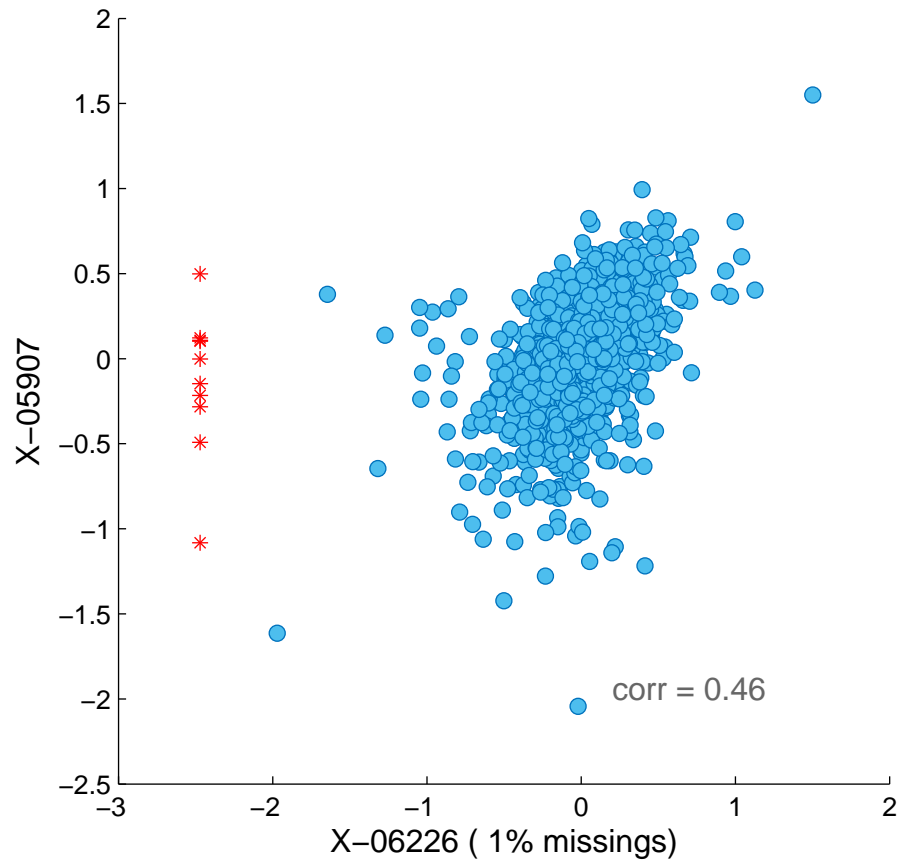

Concentrations of X-05907 in  
missing and observed X-06226

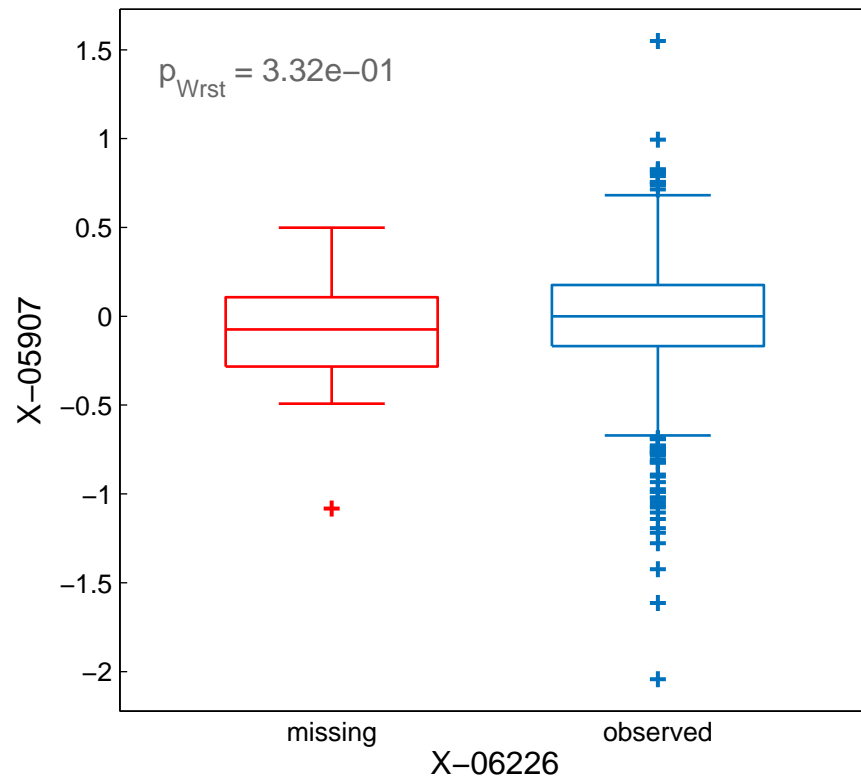



Missing values of X-06227  
in acetylphosphate

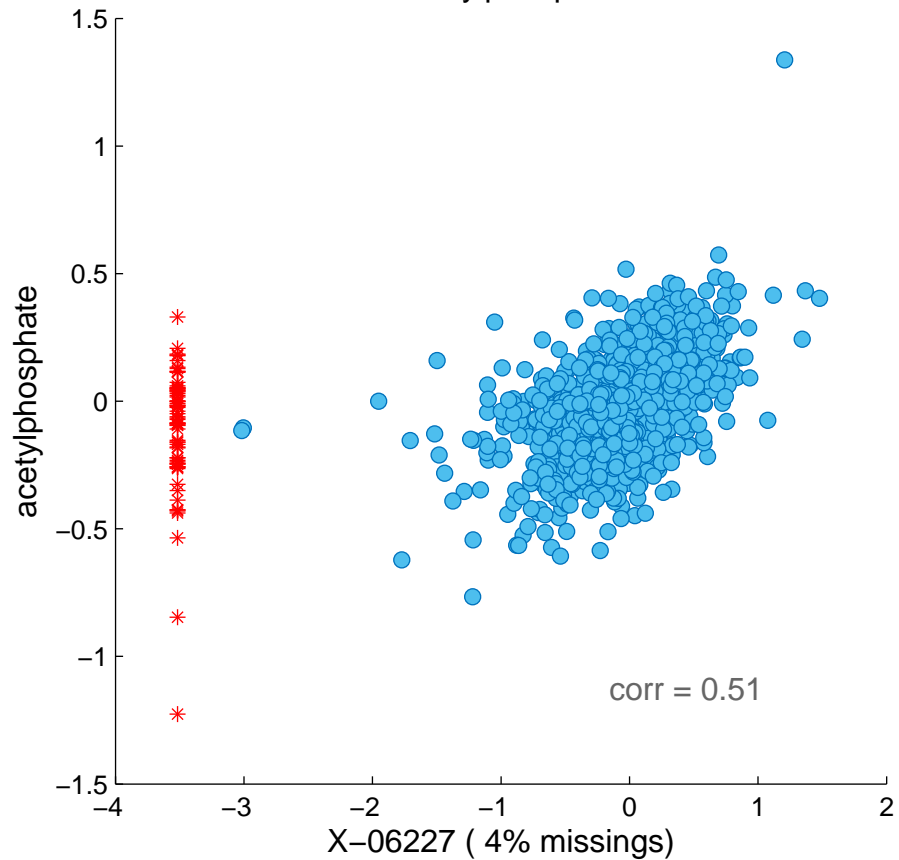

Concentrations of acetylphosphate in  
missing and observed X-06227

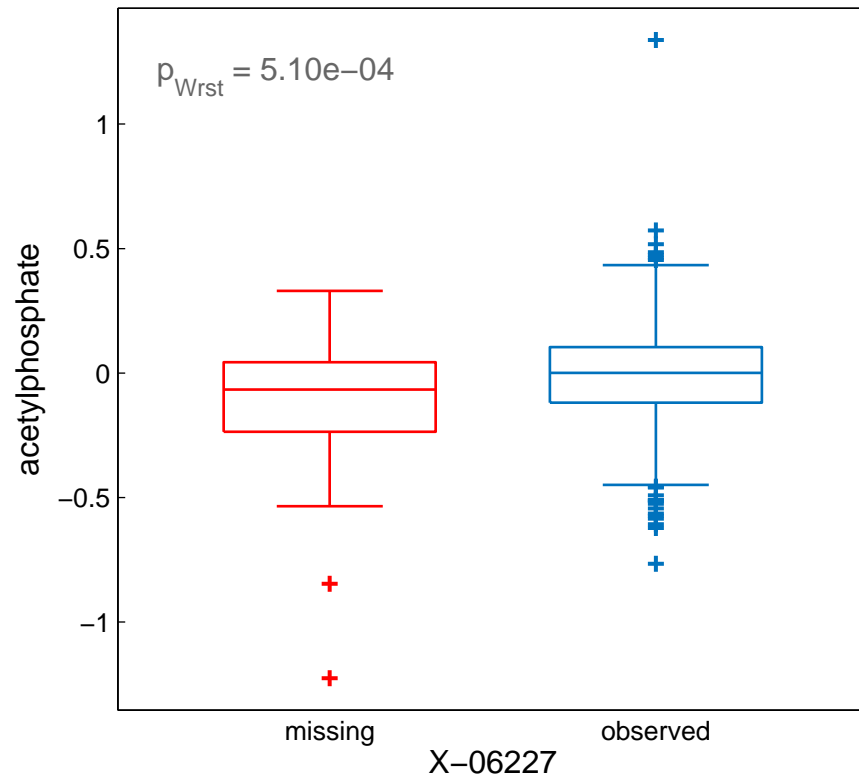

Missing values of X-06246  
in alanine

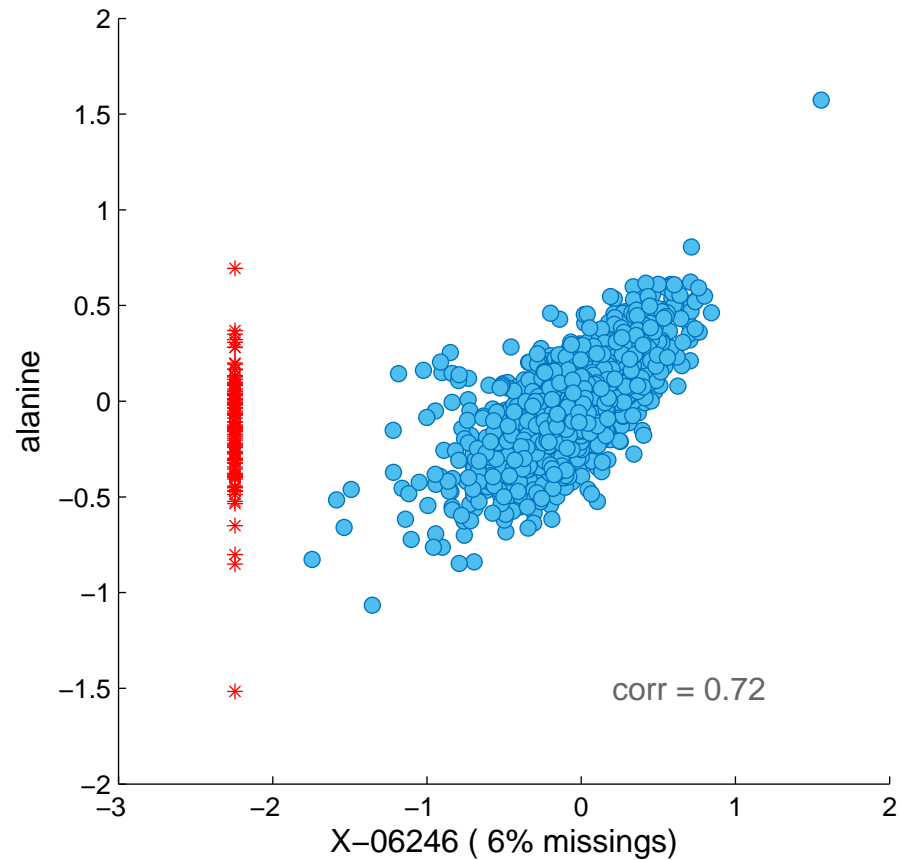

Concentrations of alanine in  
missing and observed X-06246

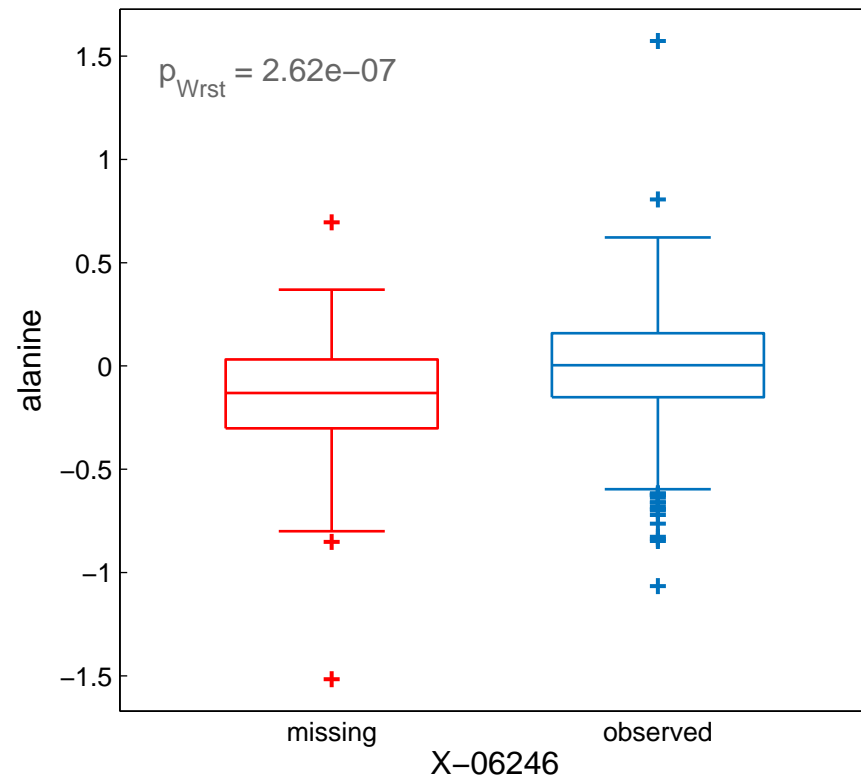

Missing values of X-06267  
in X-03088

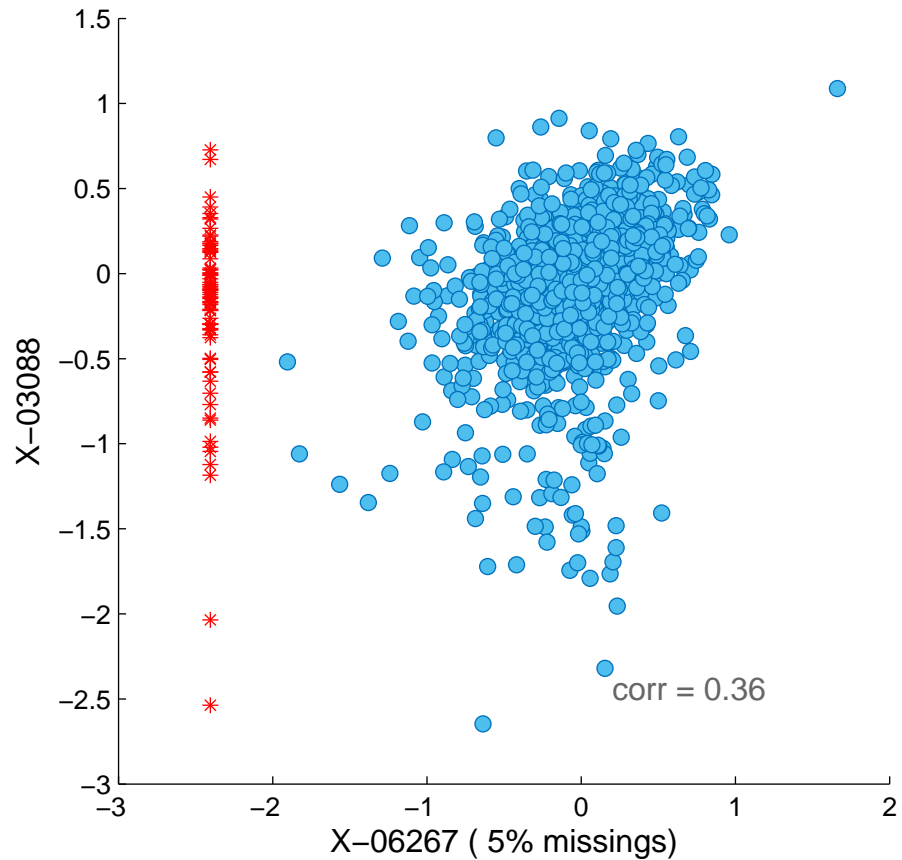

Concentrations of X-03088 in  
missing and observed X-06267

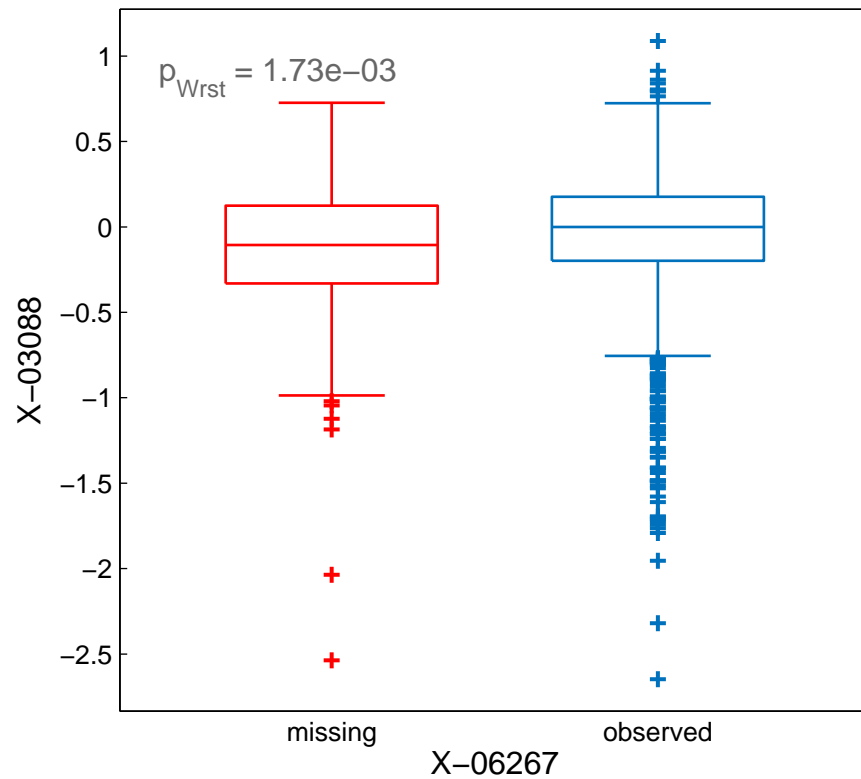

Missing values of X-06307  
in X-11805

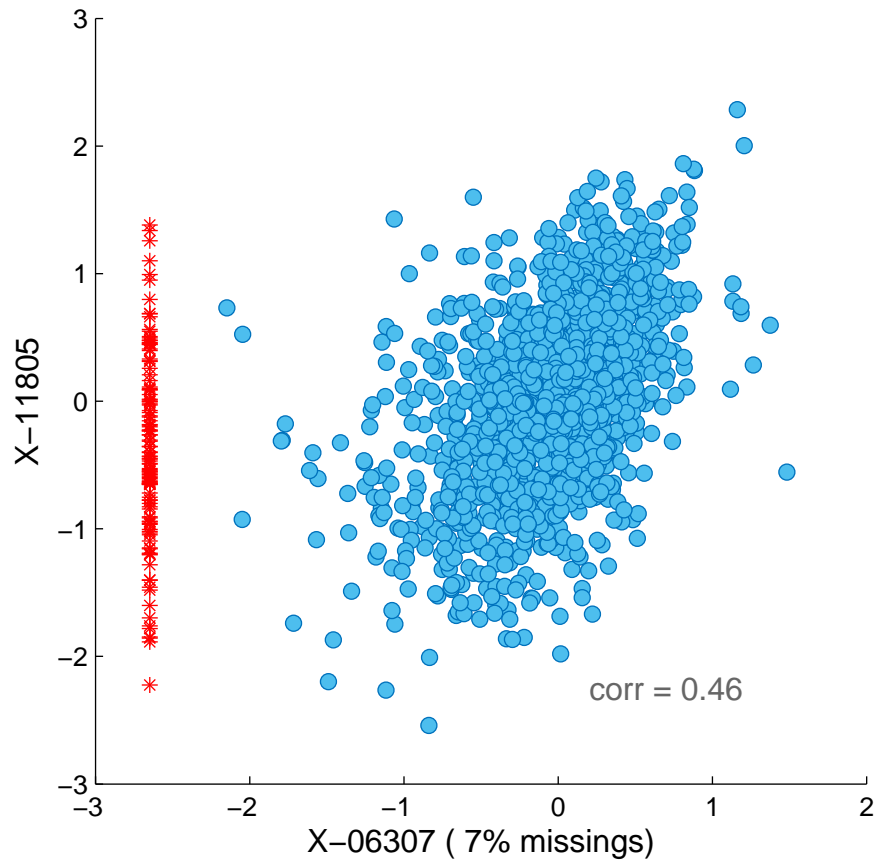

Concentrations of X-11805 in  
missing and observed X-06307

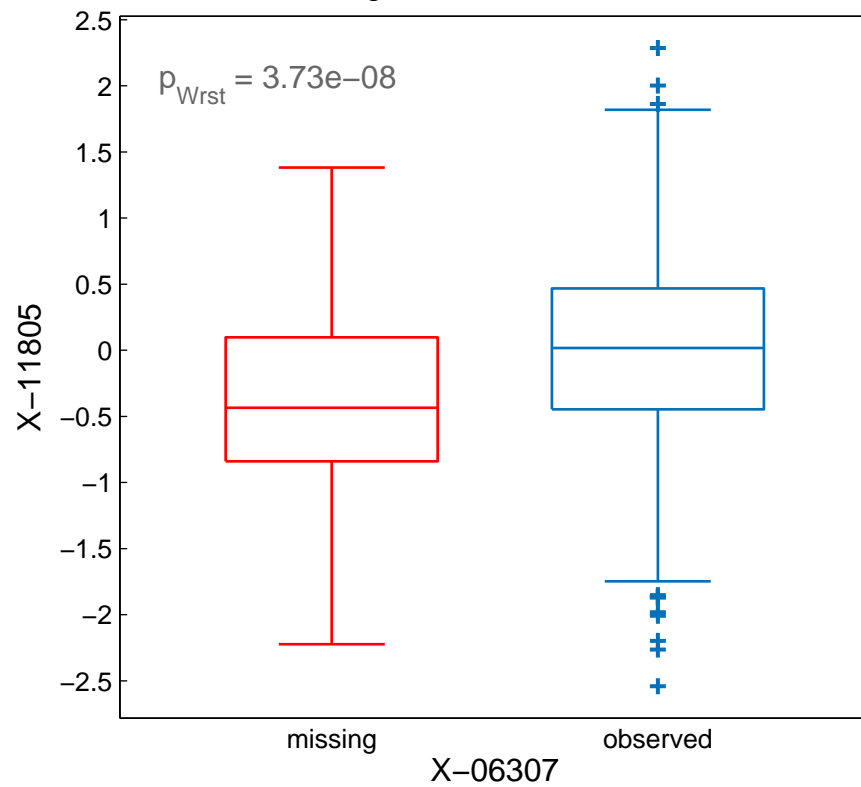

Missing values of X-06350  
in cholesterol

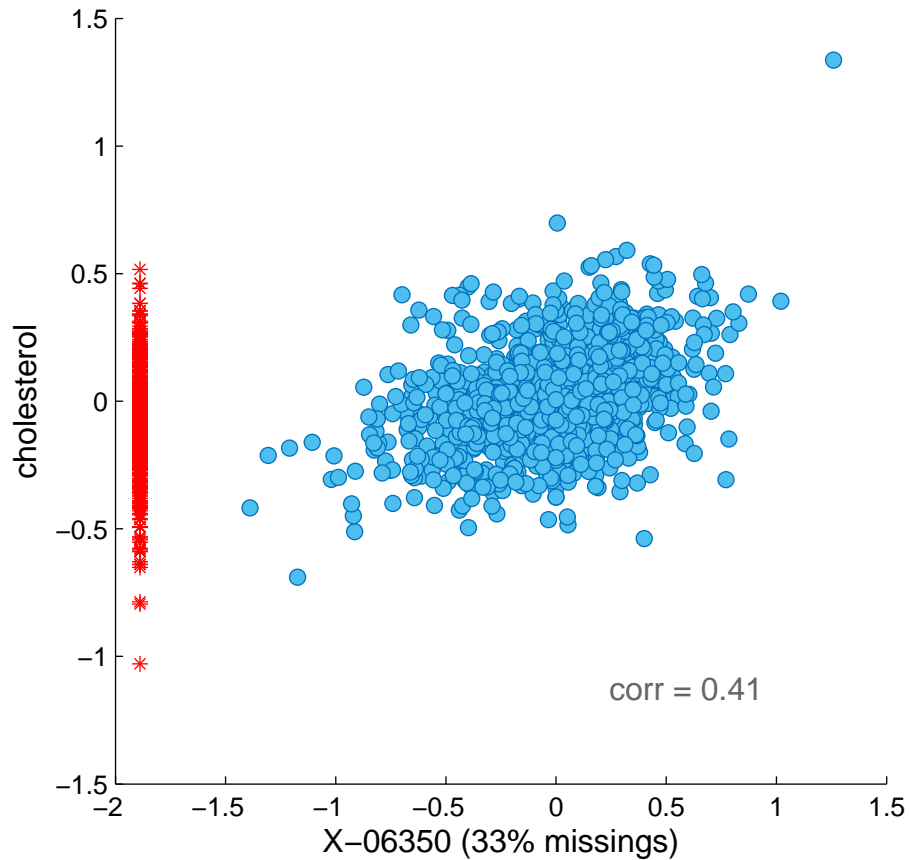

Concentrations of cholesterol in  
missing and observed X-06350

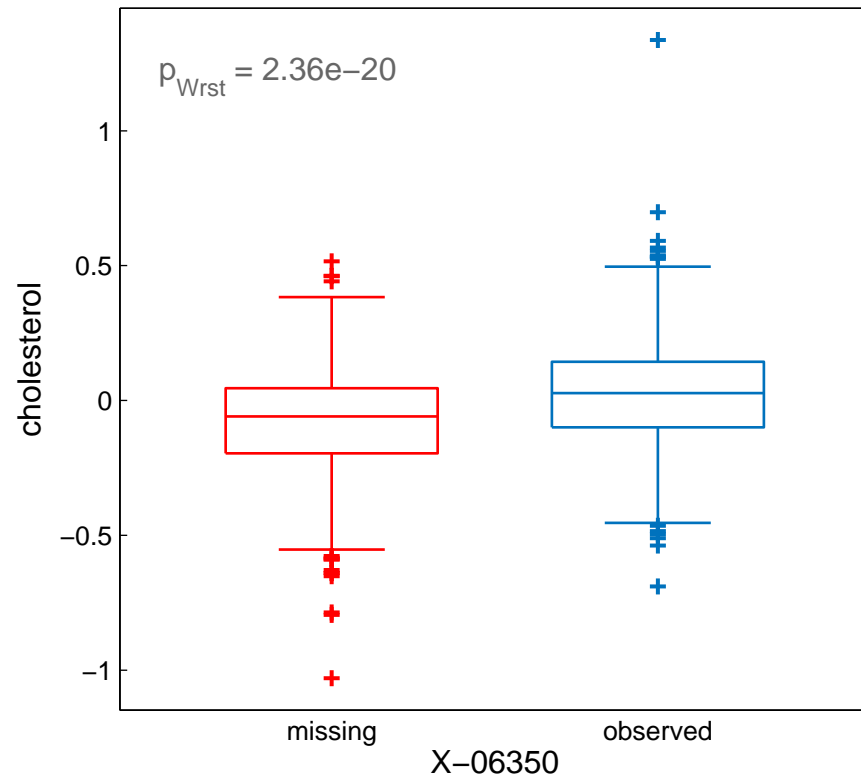

Missing values of X-06351  
in urea

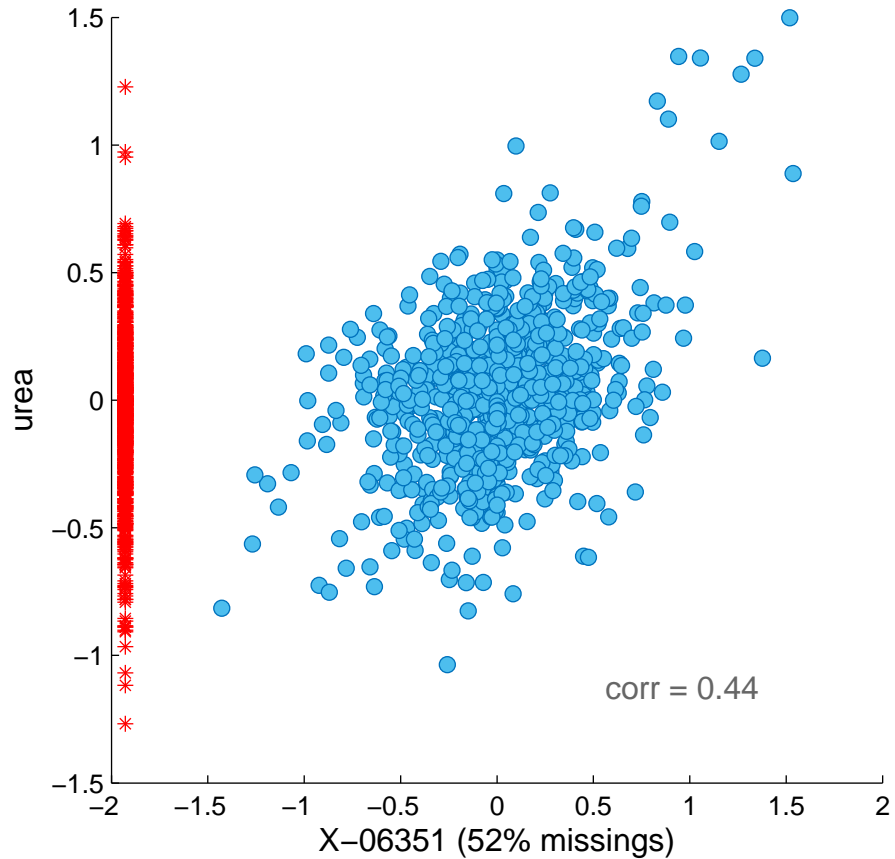

Concentrations of urea in  
missing and observed X-06351

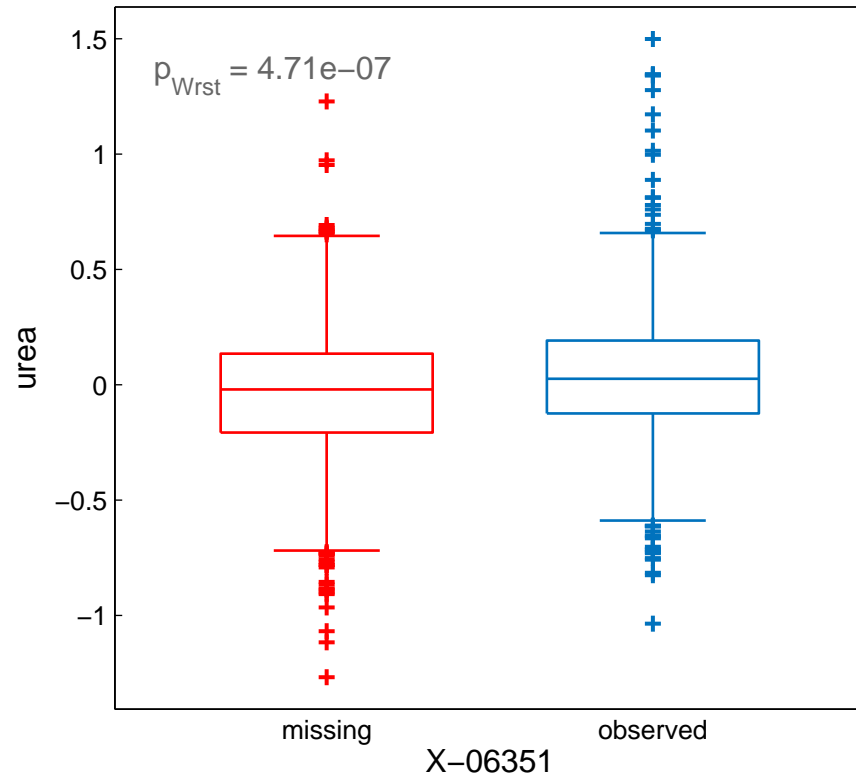

Missing values of X-08402  
in X-10510

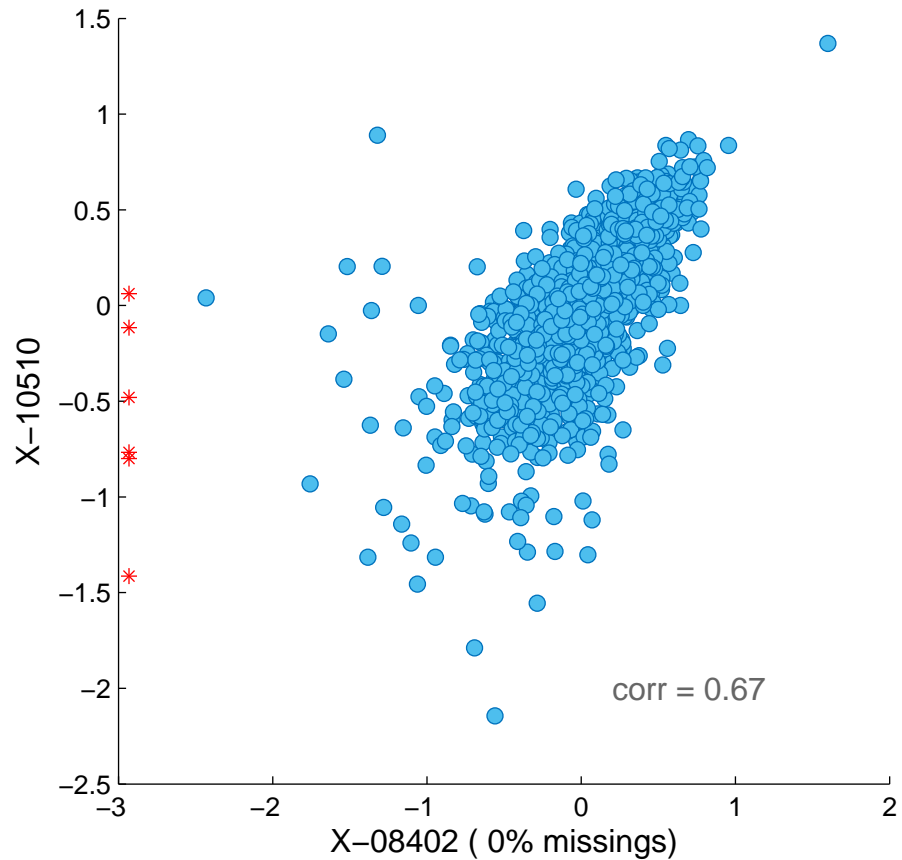

Concentrations of X-10510 in  
missing and observed X-08402

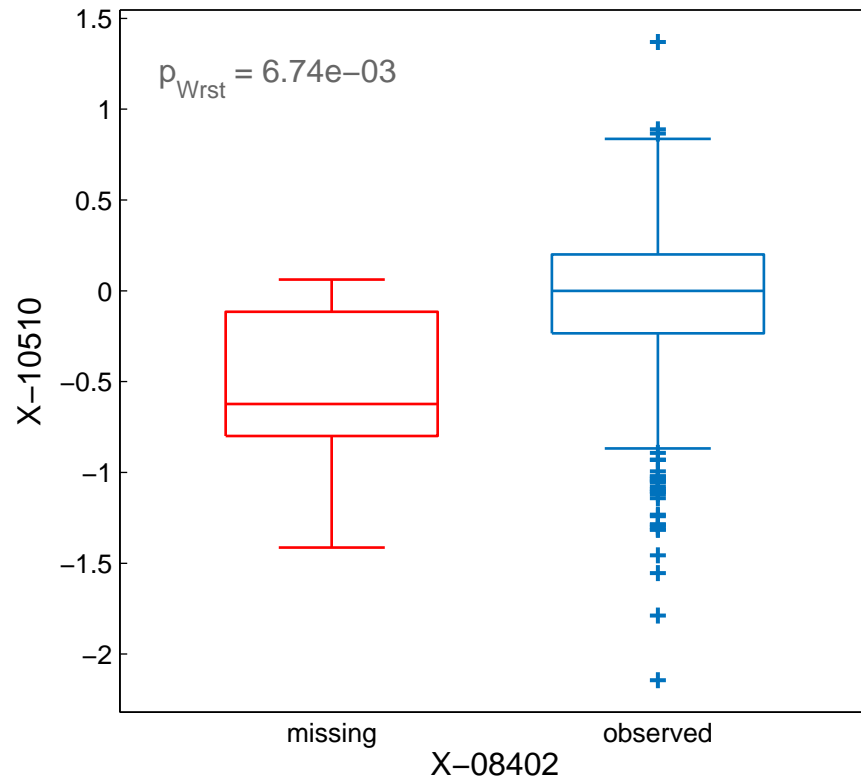

Missing values of X-08766  
in X-03094

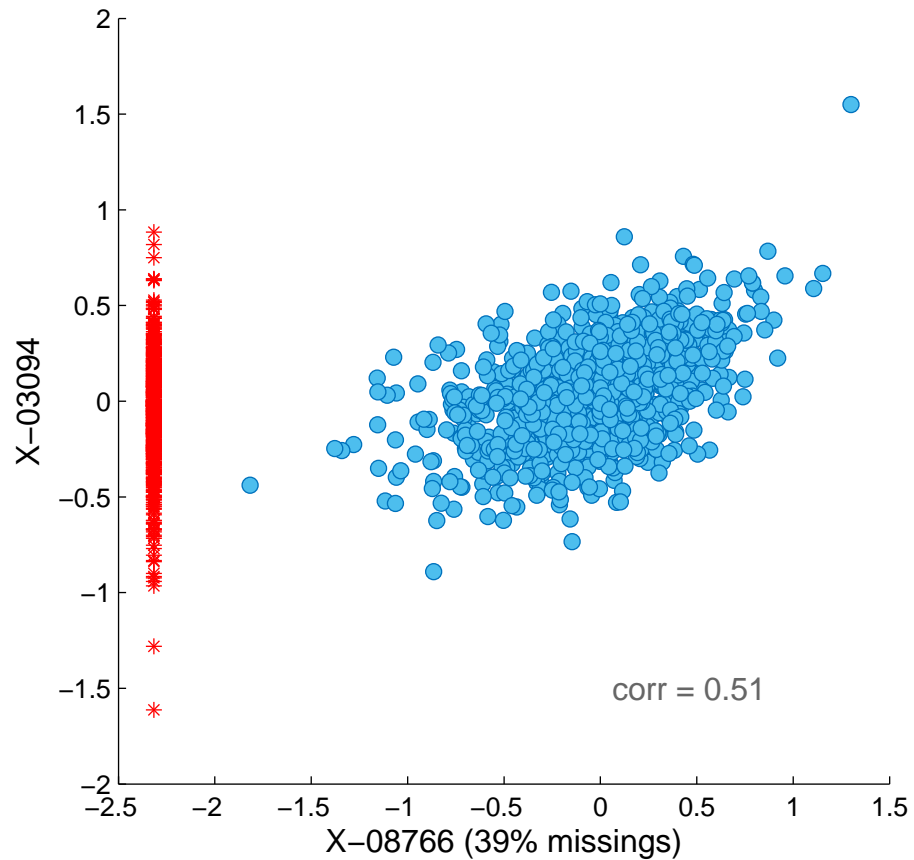

Concentrations of X-03094 in  
missing and observed X-08766

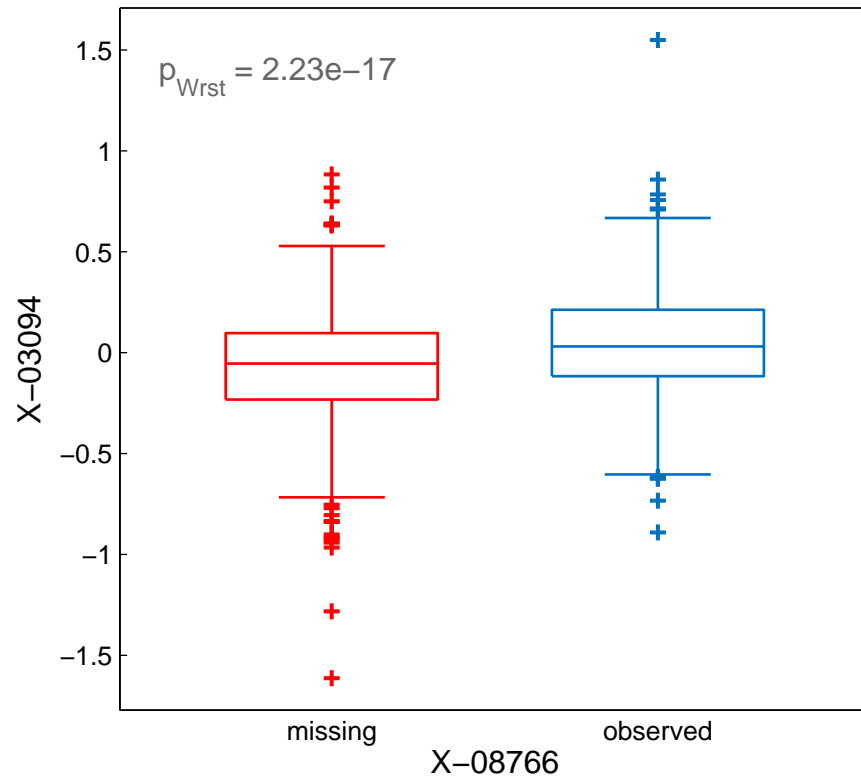



Missing values of X-09026  
in X-10395

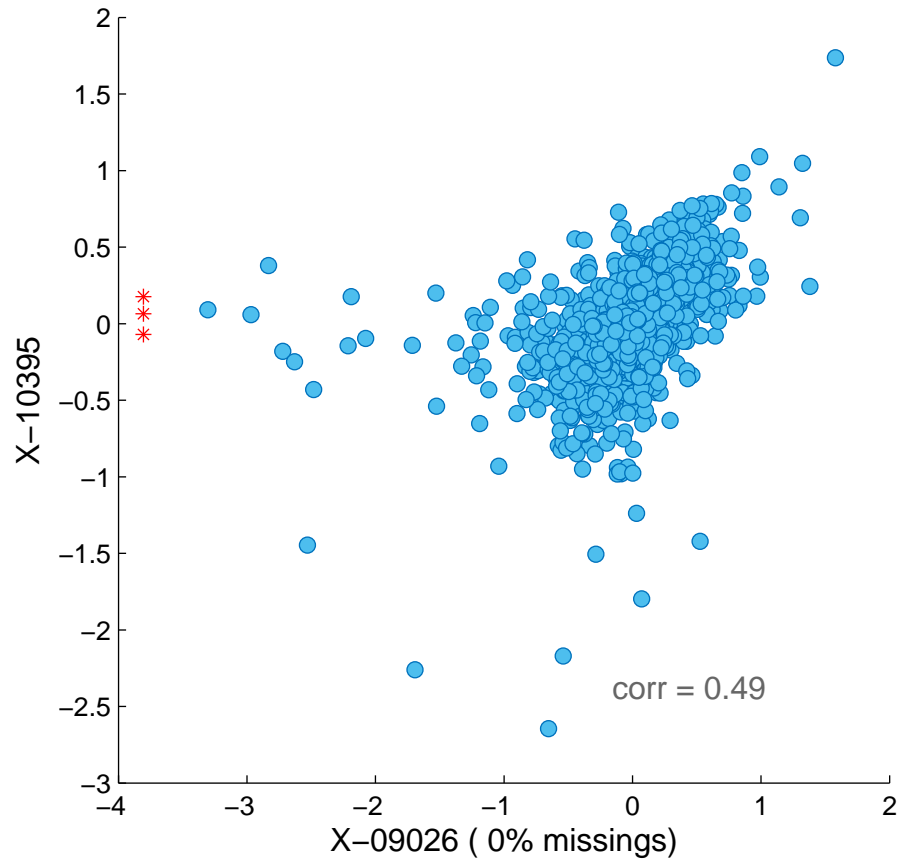

Concentrations of X-10395 in  
missing and observed X-09026

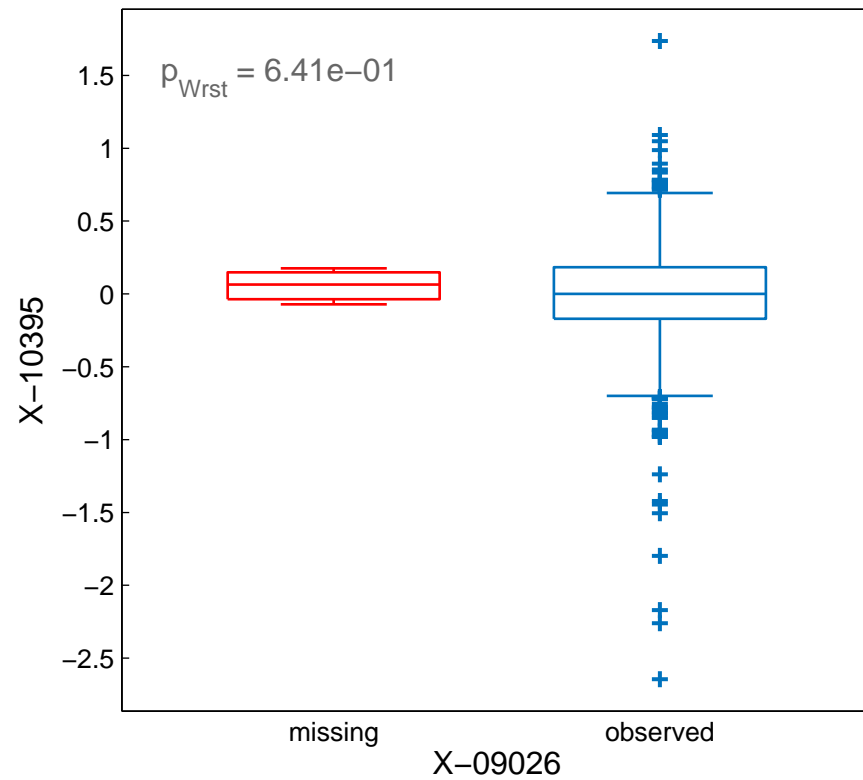

Missing values of X-09706  
in urea

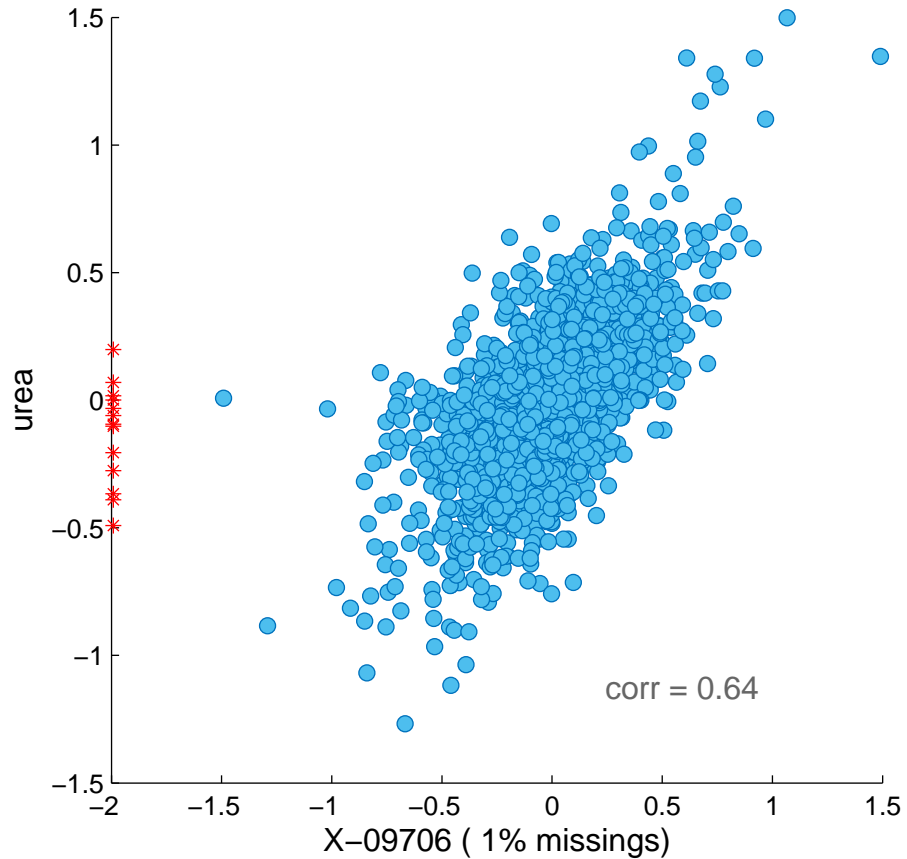

Concentrations of urea in  
missing and observed X-09706

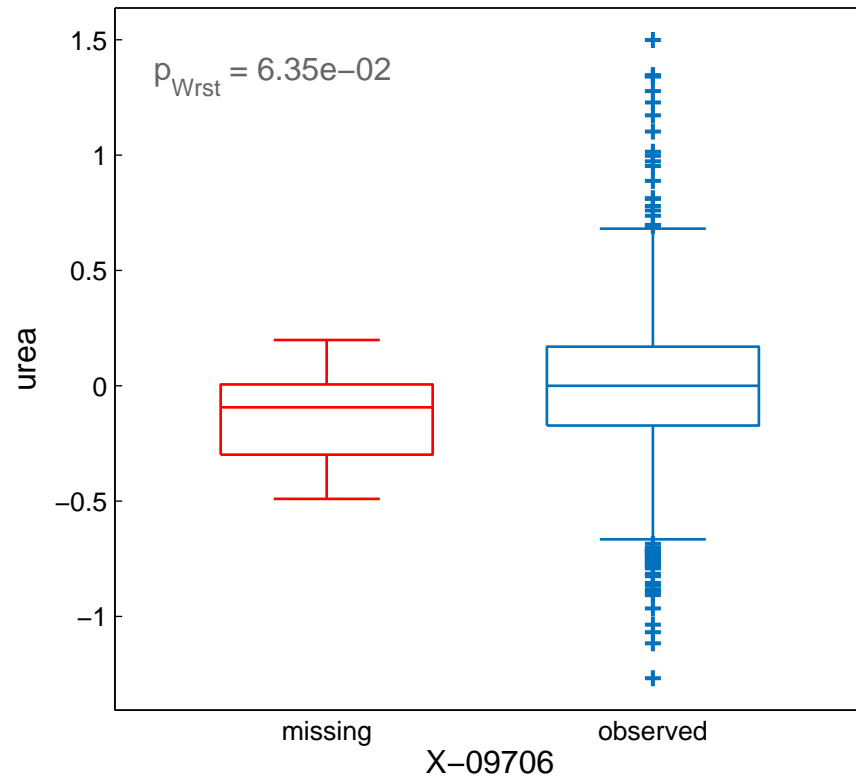

Missing values of X-10346  
in X-11437

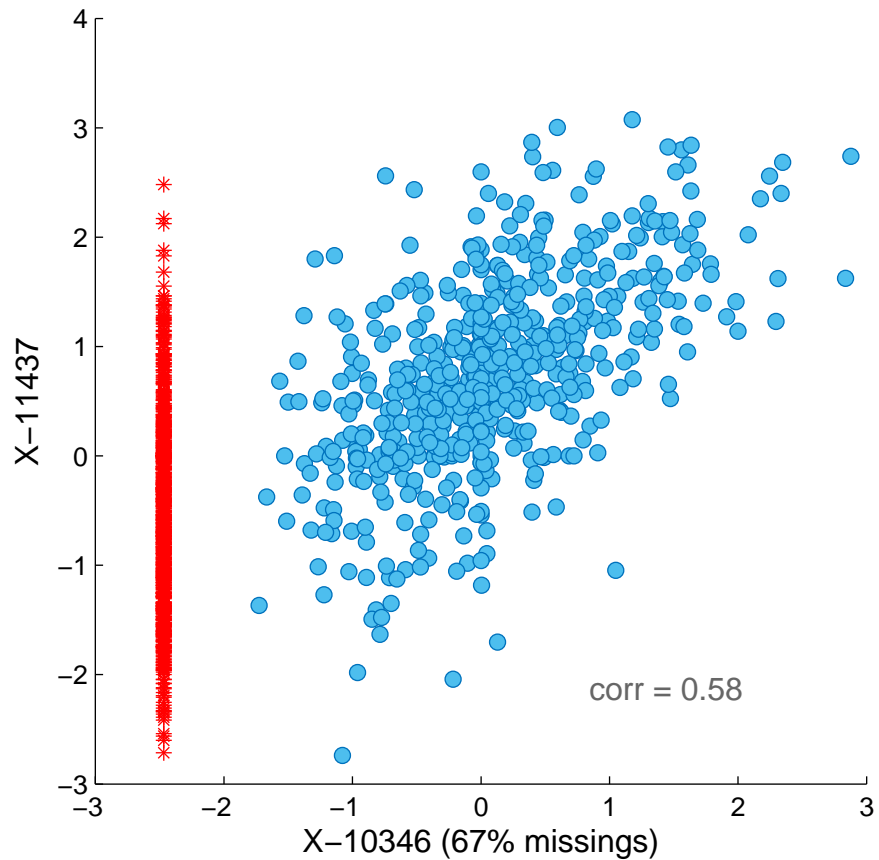

Concentrations of X-11437 in  
missing and observed X-10346

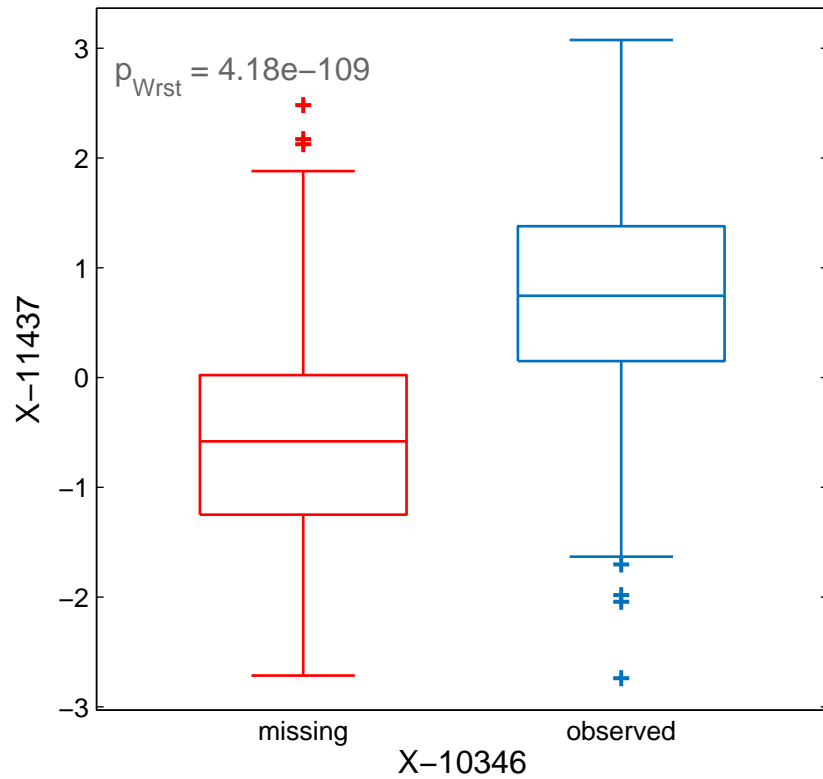

Missing values of X-10395  
in X-05907

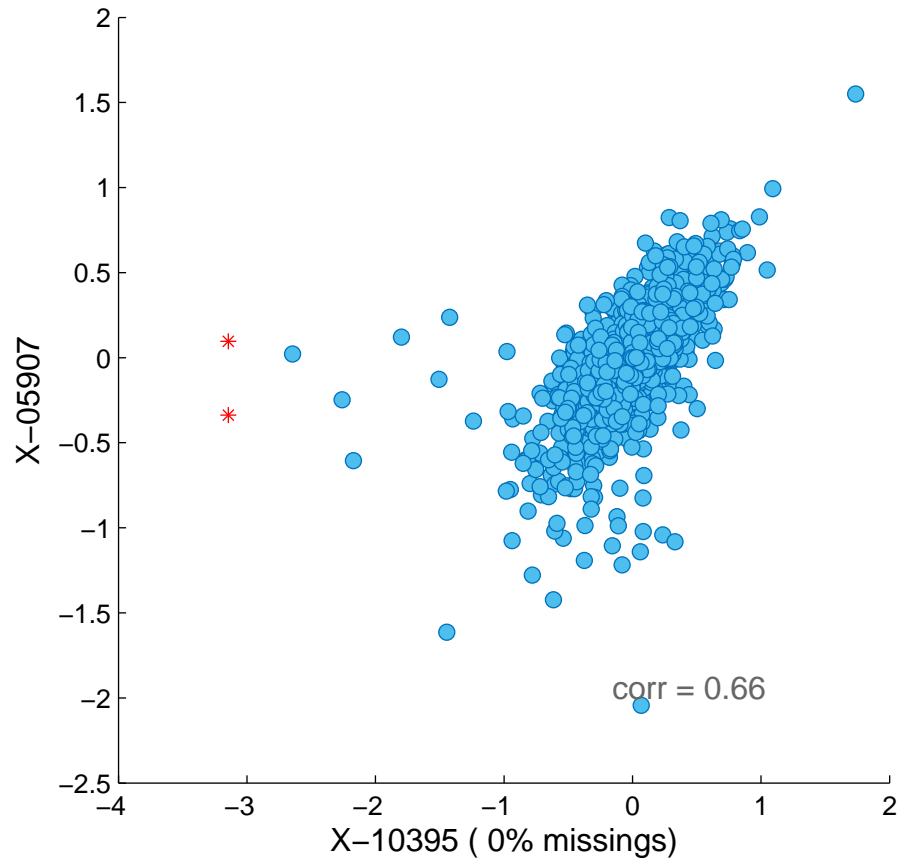

Concentrations of X-05907 in  
missing and observed X-10395

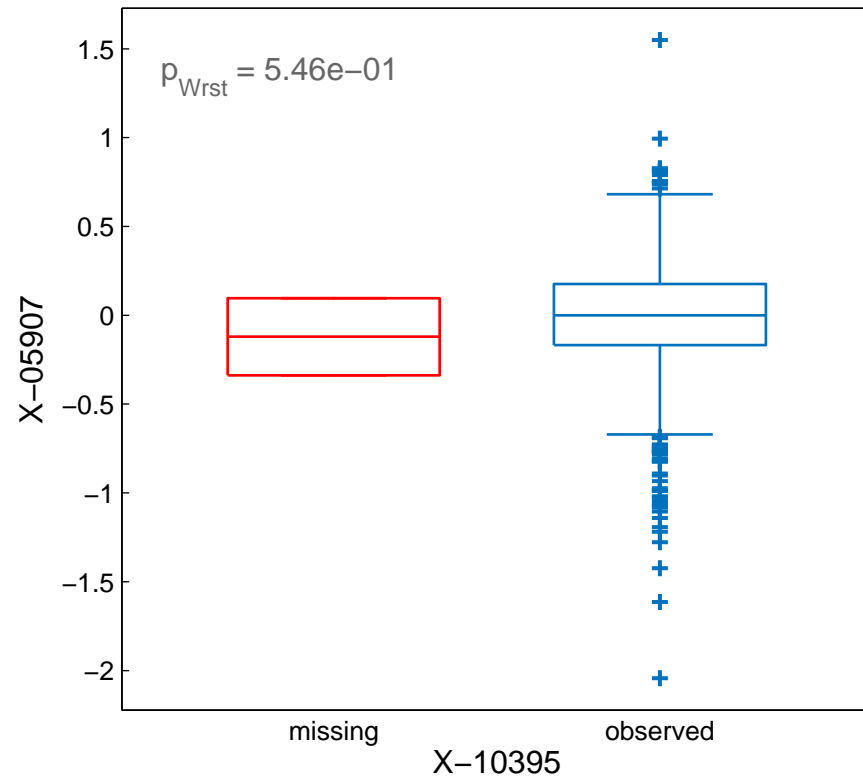

Missing values of X-10429  
in X-10395

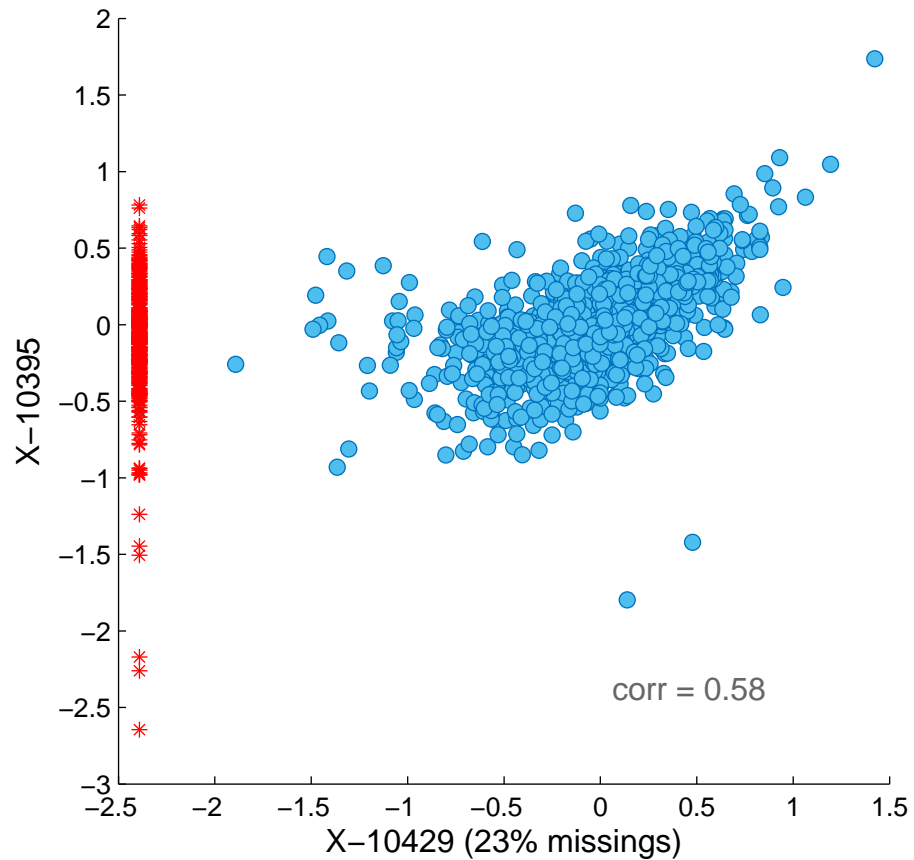

Concentrations of X-10395 in  
missing and observed X-10429

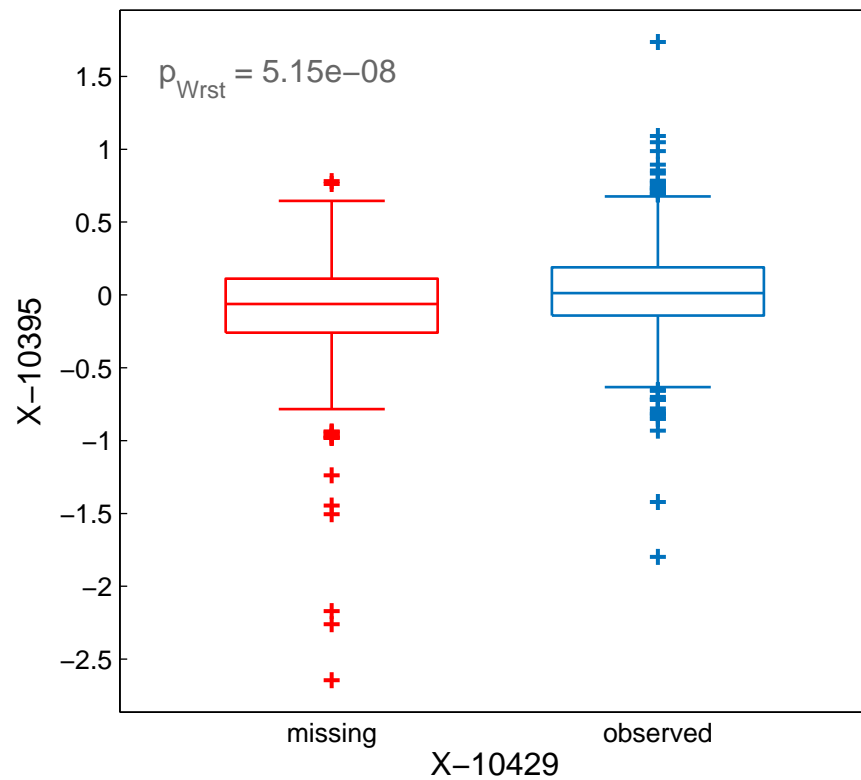

Missing values of X-10506  
in alanine

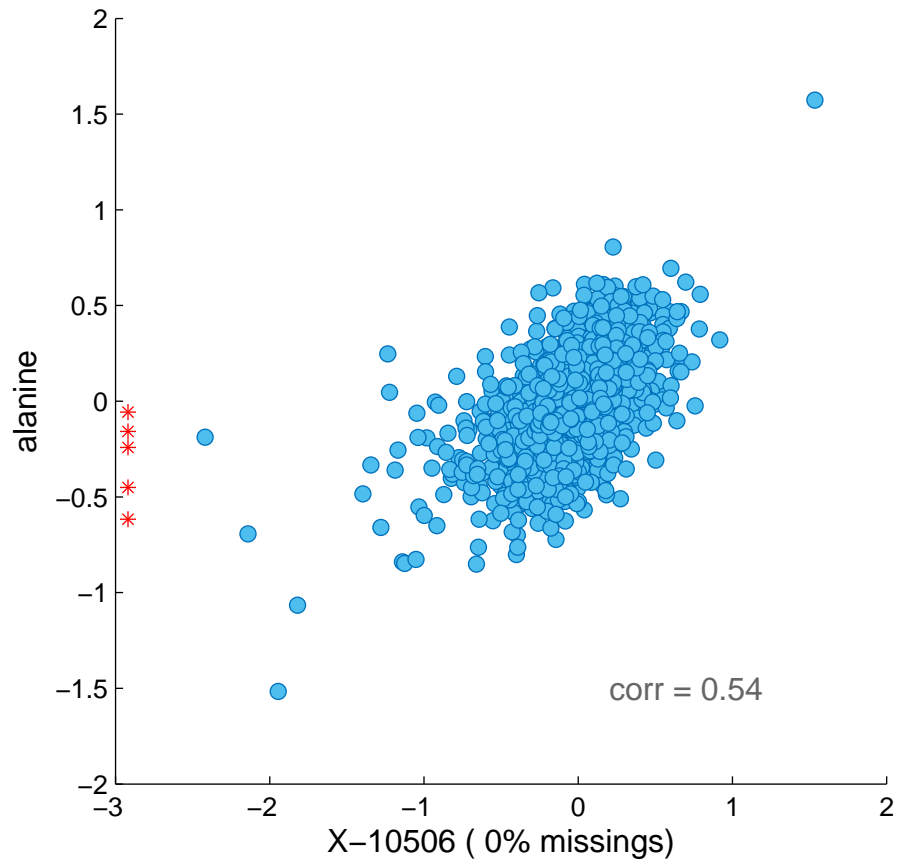

Concentrations of alanine in  
missing and observed X-10506

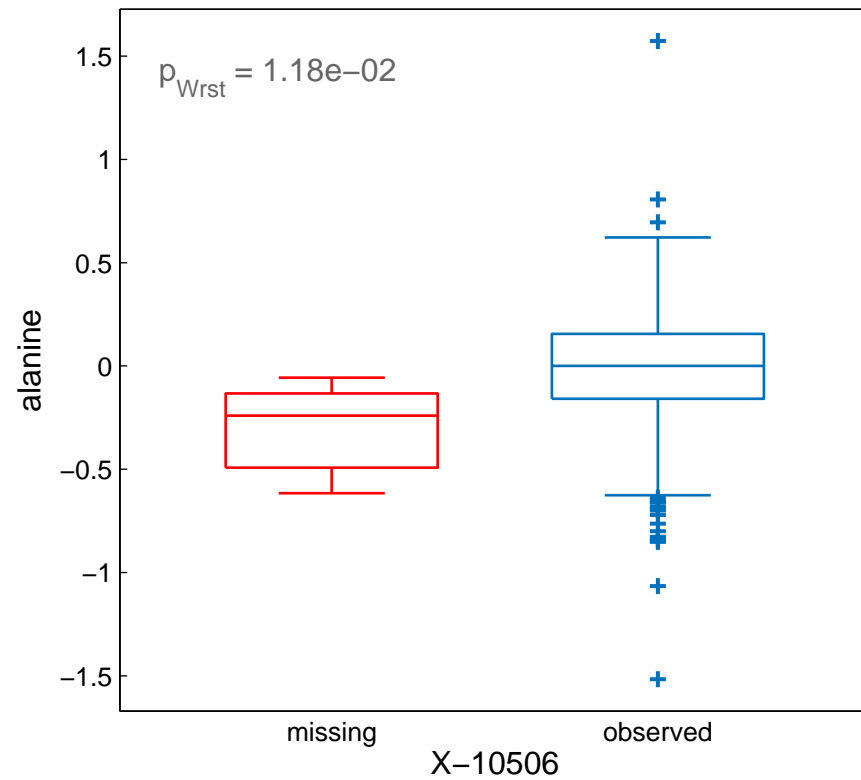

Missing values of X-10510  
in X-08402

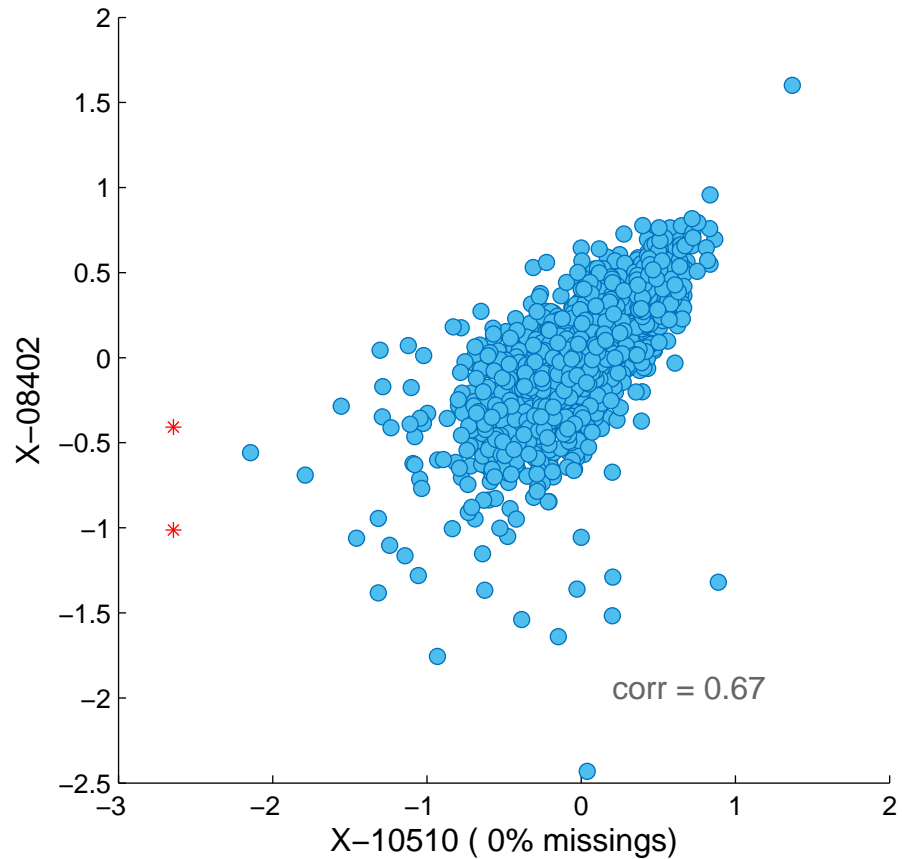

Concentrations of X-08402 in  
missing and observed X-10510

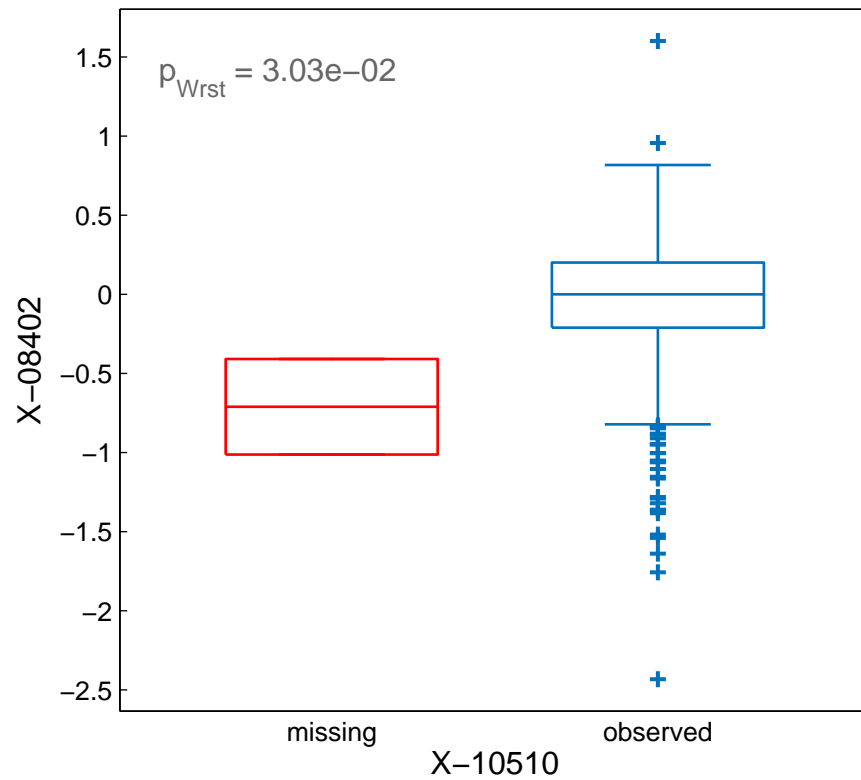

Missing values of X-10675  
in X-08988

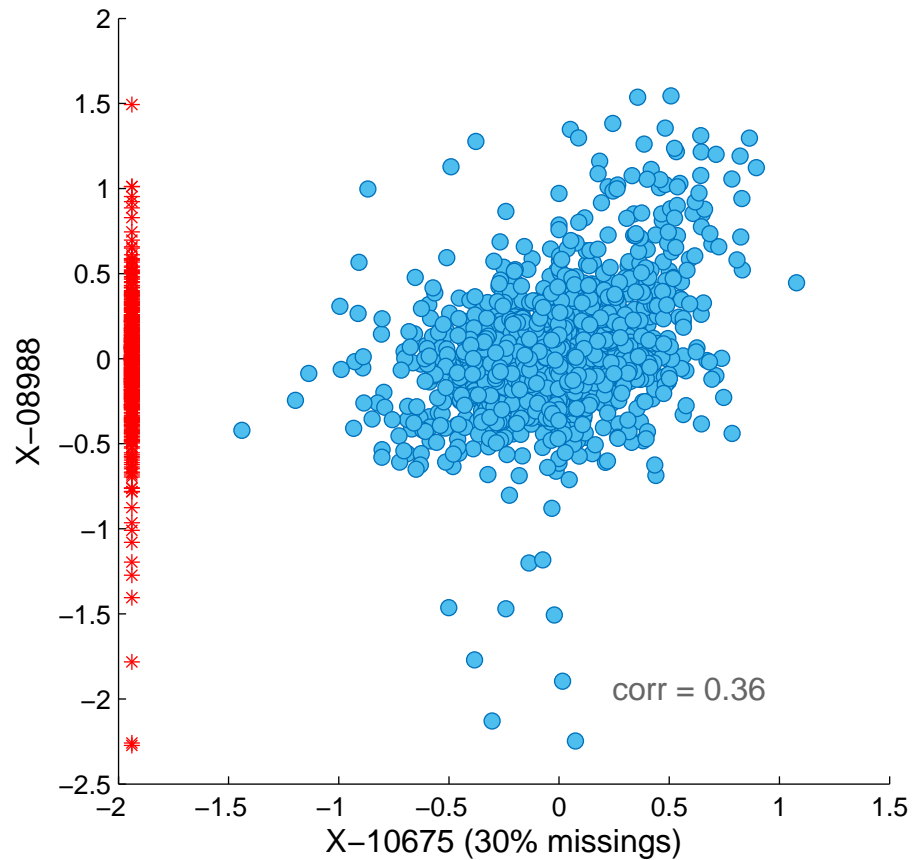

Concentrations of X-08988 in  
missing and observed X-10675

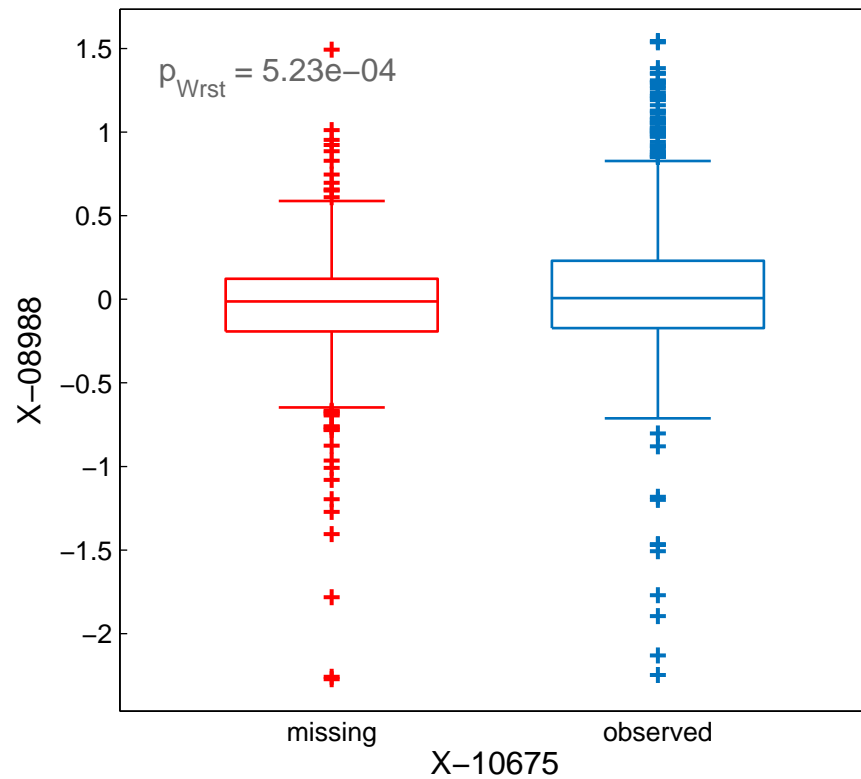



Missing values of X-10810  
in X-03003

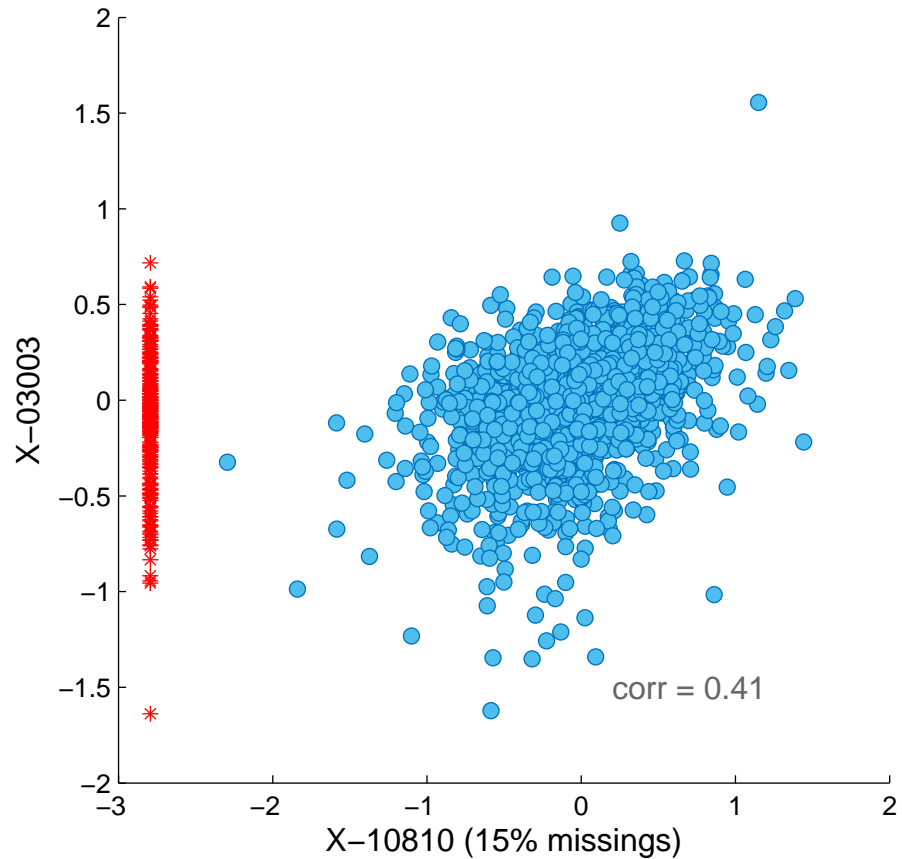

Concentrations of X-03003 in  
missing and observed X-10810

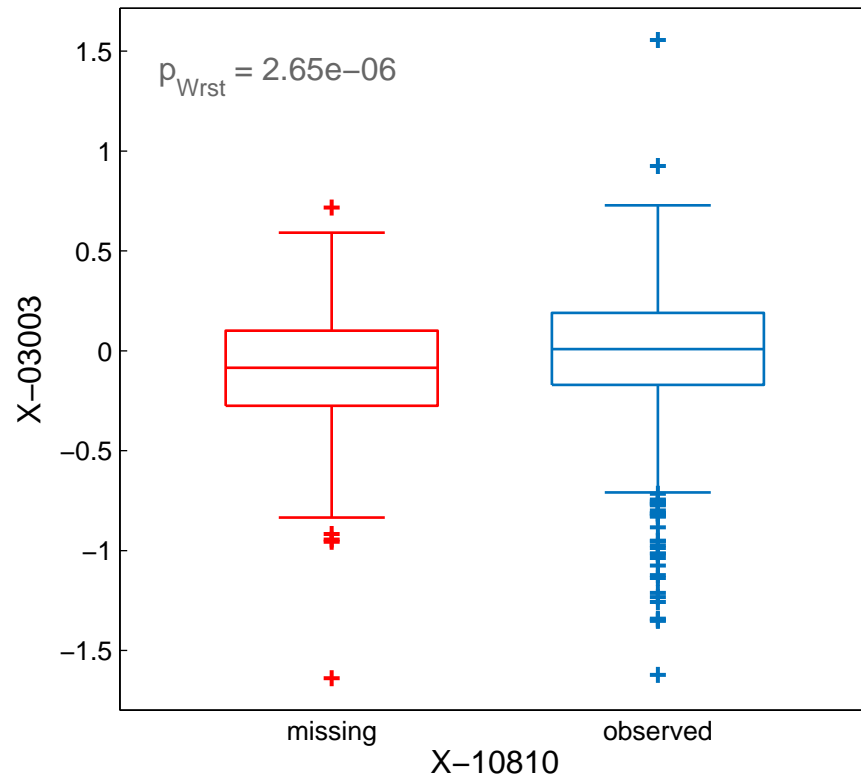

Missing values of X-11261  
in X-11521

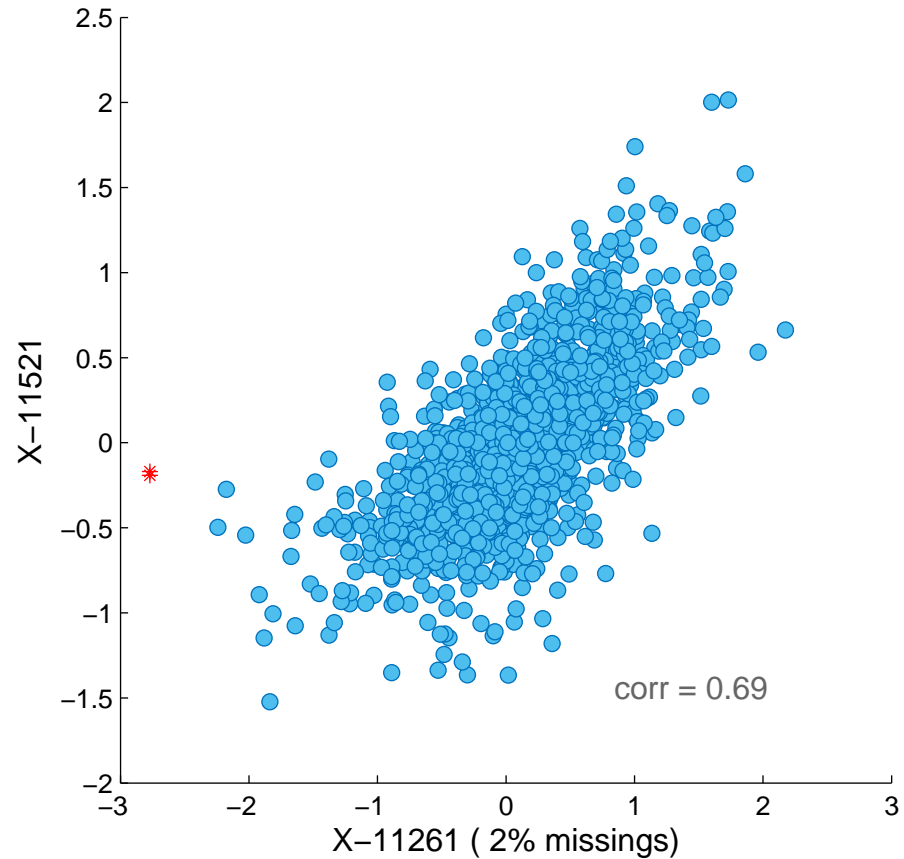

Concentrations of X-11521 in  
missing and observed X-11261

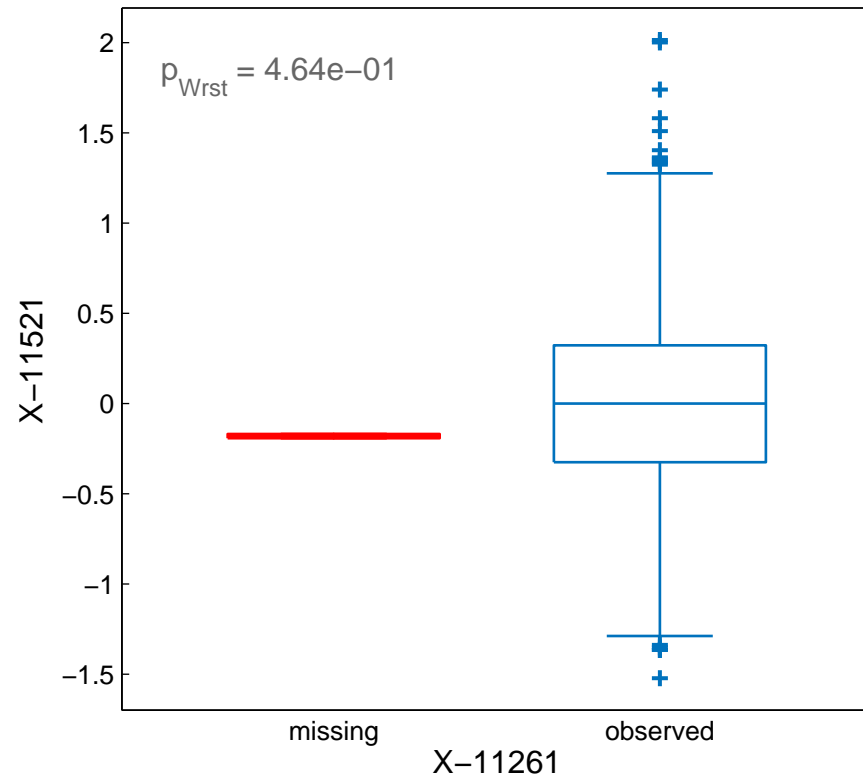

Missing values of X-11299  
in X-11483

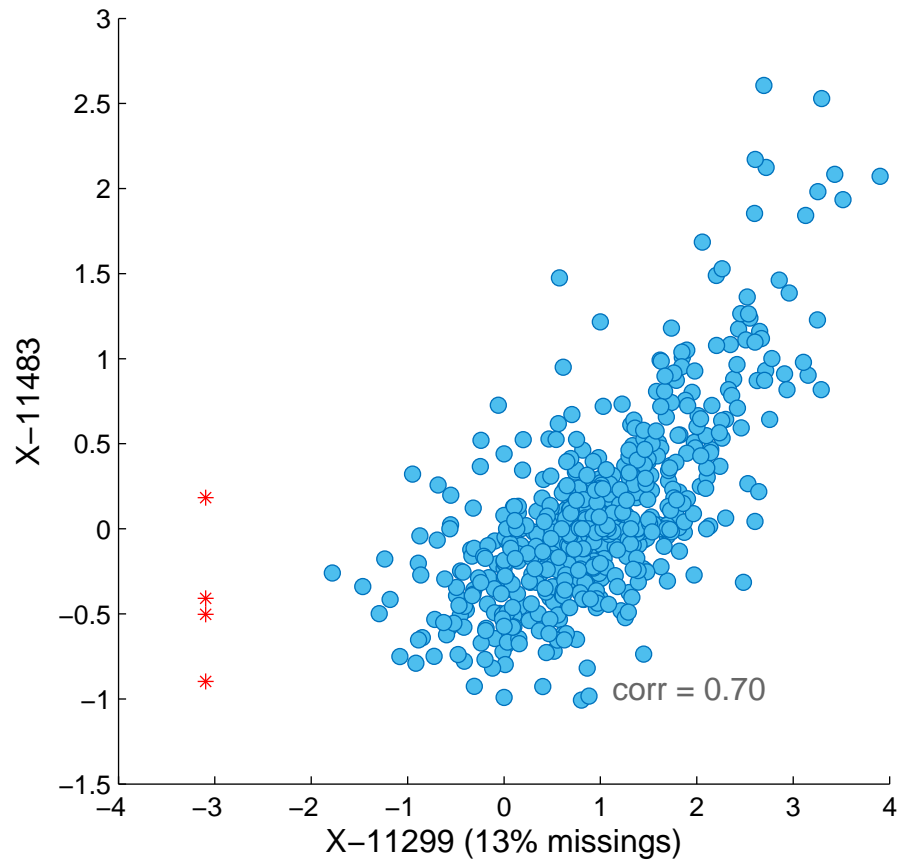

Concentrations of X-11483 in  
missing and observed X-11299

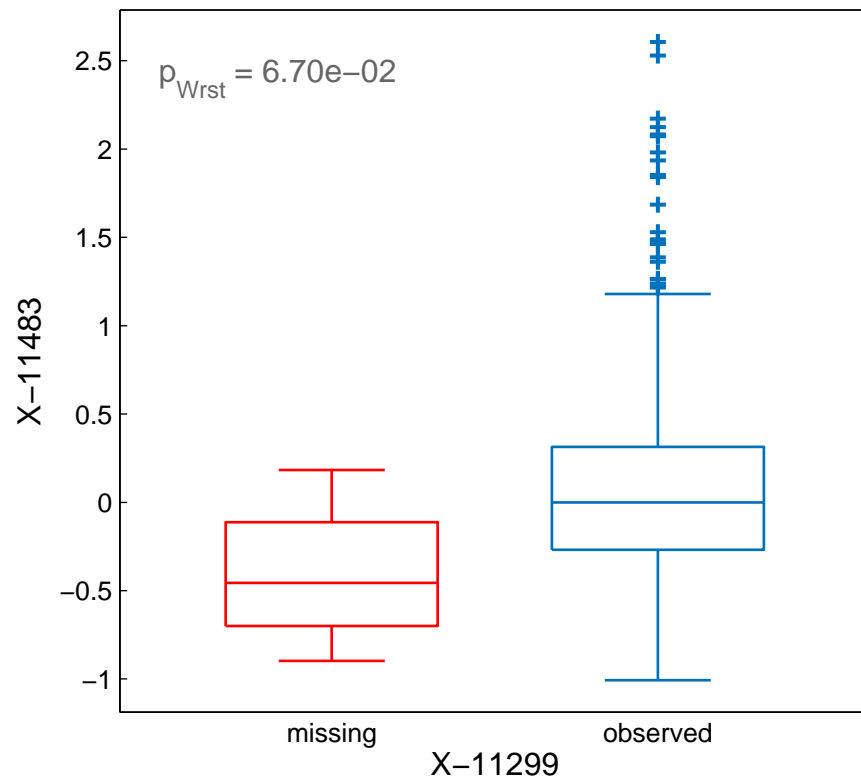

Missing values of 15-methylpalmitate (isobar with 2-methylpalmitate) in myristate (14:0)

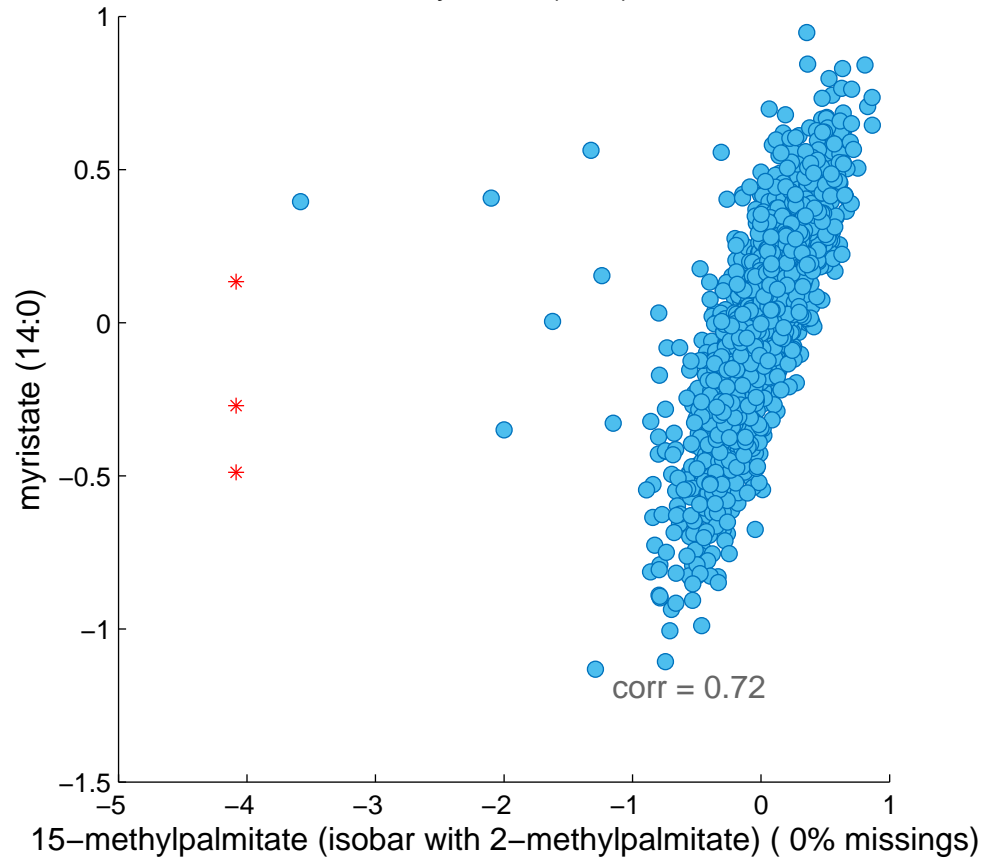

Concentrations of myristate (14:0) in missing and observed 15-methylpalmitate (isobar with 2-methylpalmitate)

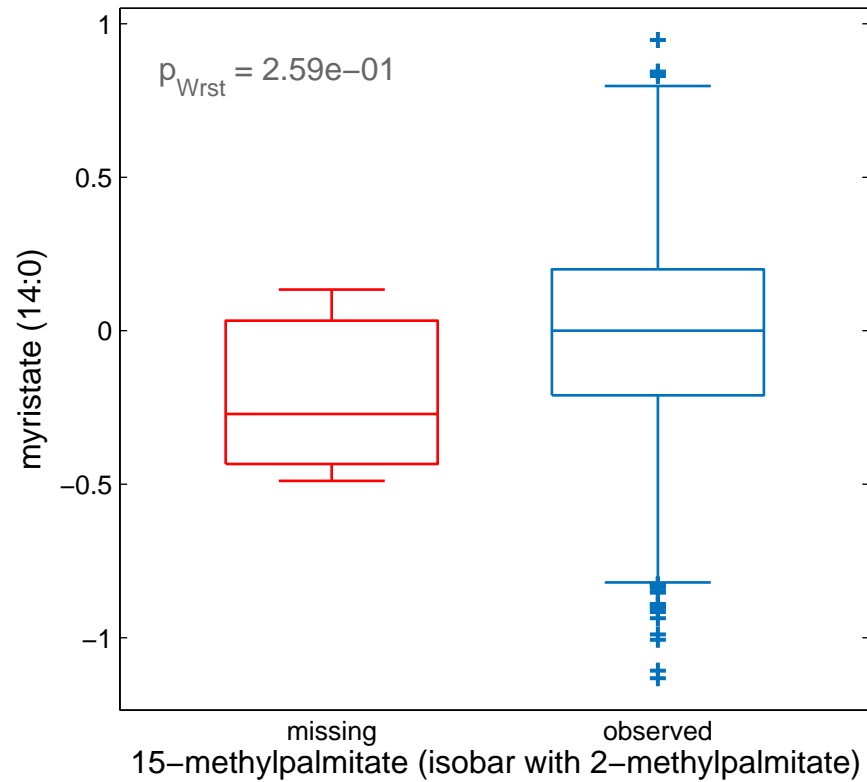

Missing values of X-11334  
in pseudouridine

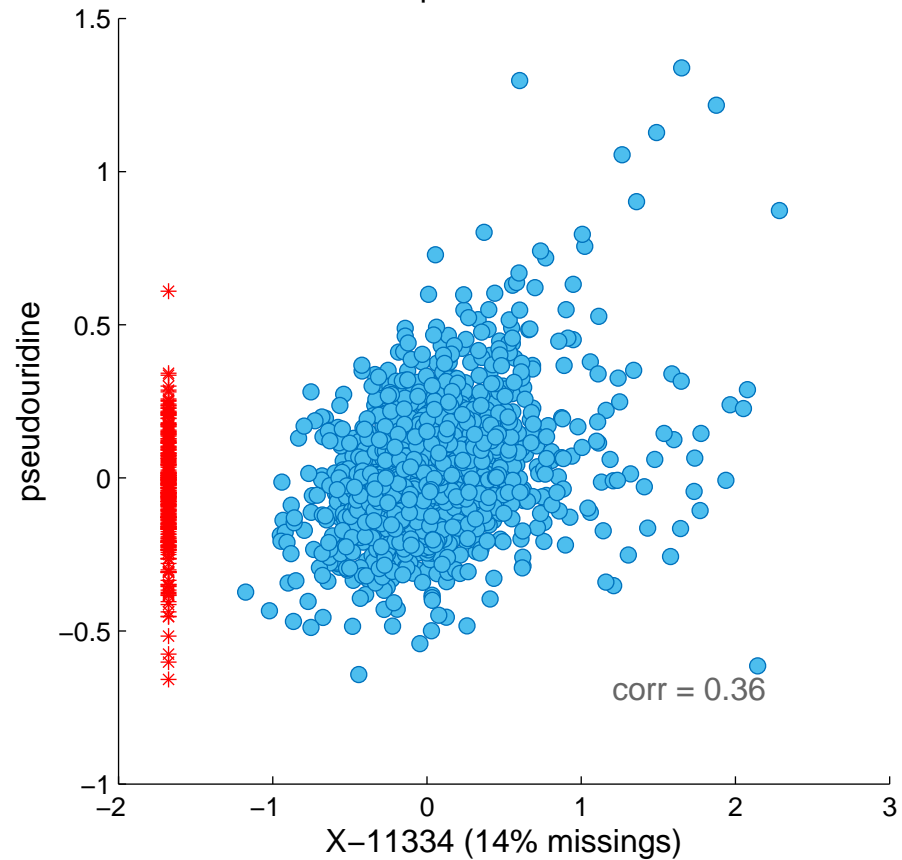

Concentrations of pseudouridine in  
missing and observed X-11334

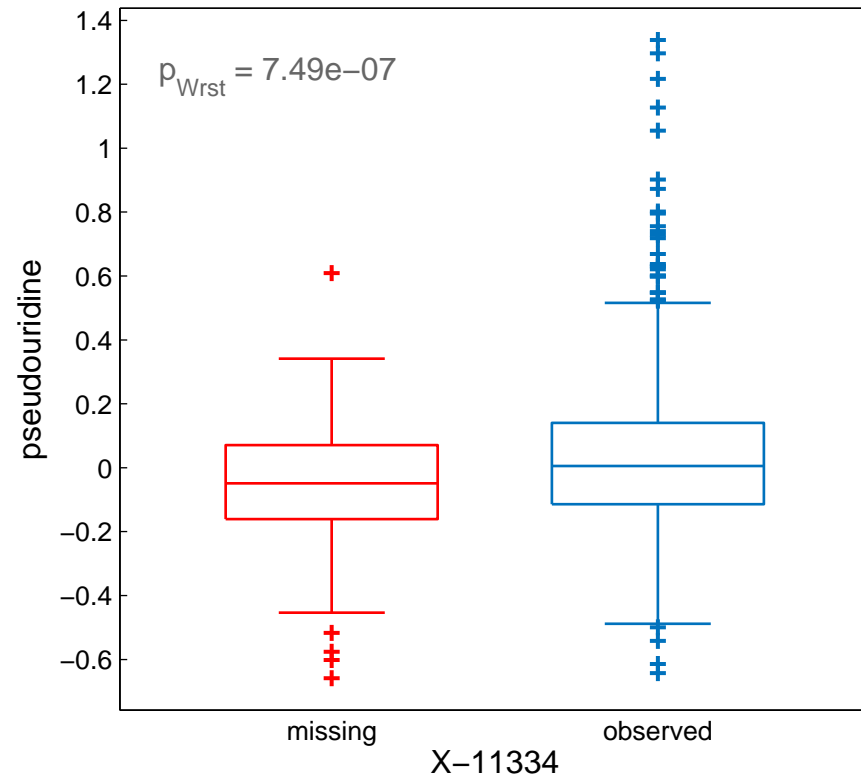

Missing values of X-11437  
in X-10346

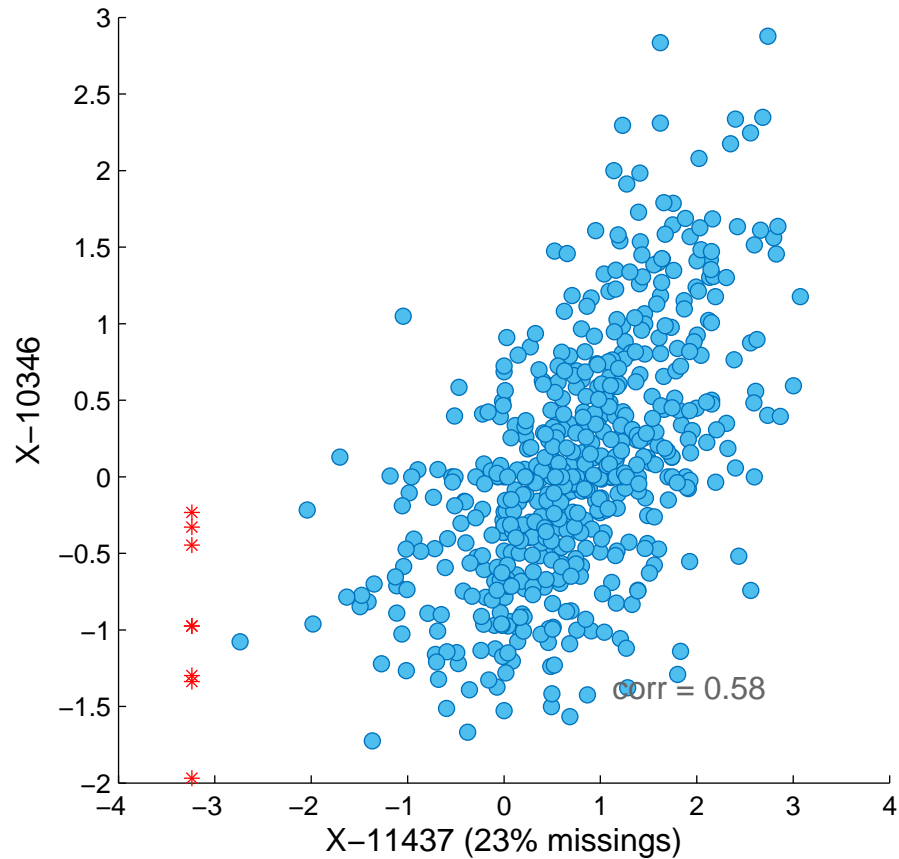

Concentrations of X-10346 in  
missing and observed X-11437

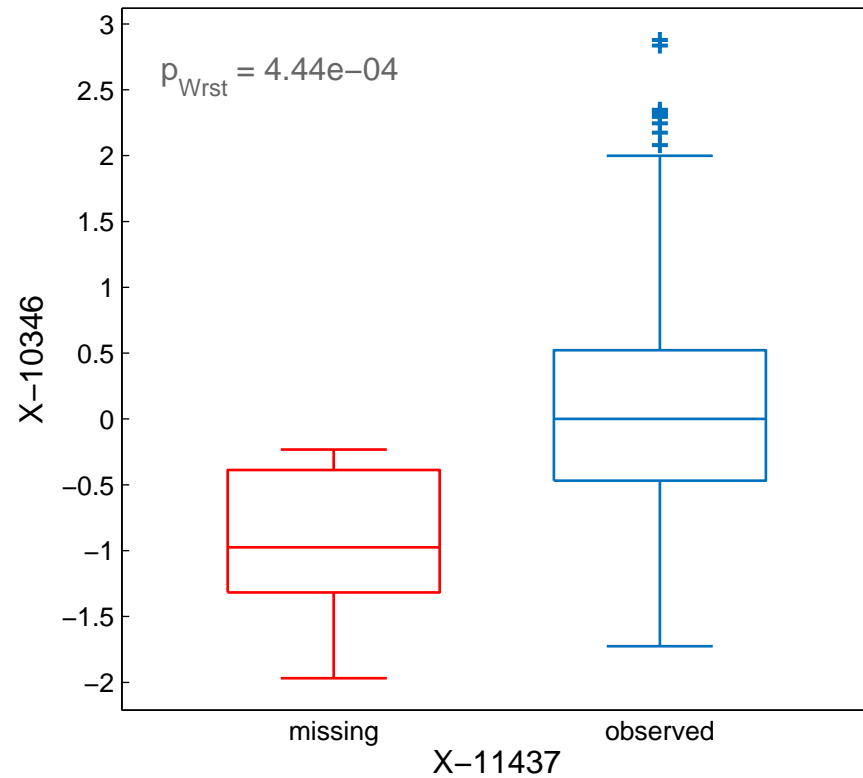

Missing values of X-11438  
in 10-undecenoate (11:1n1)

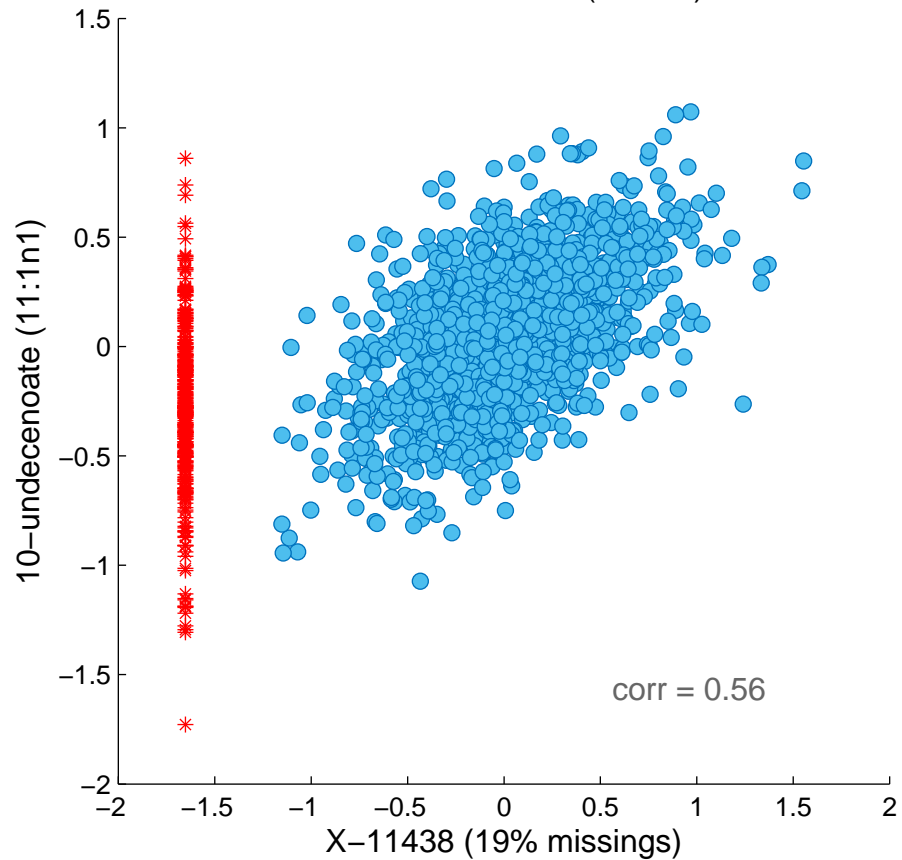

Concentrations of 10-undecenoate (11:1n1) in  
missing and observed X-11438

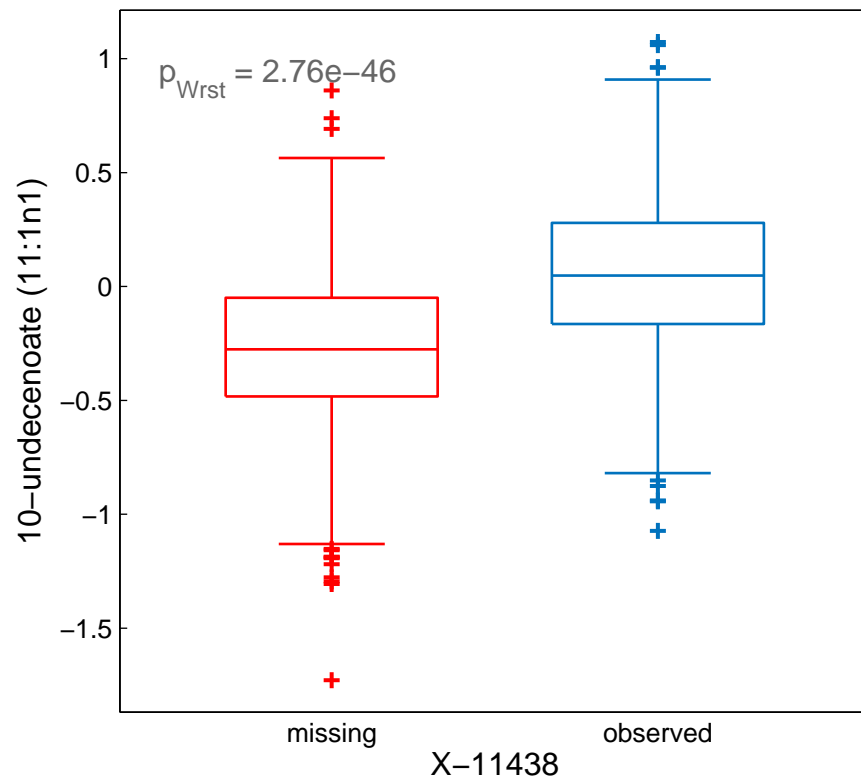

Missing values of X-11440  
in X-11244

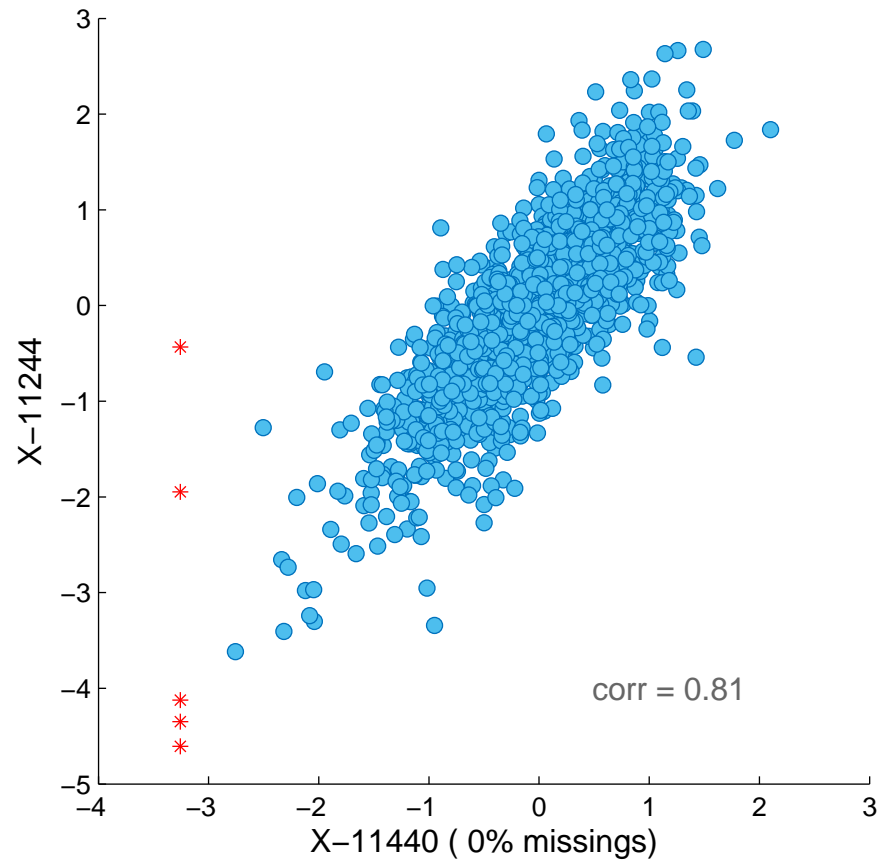

Concentrations of X-11244 in  
missing and observed X-11440

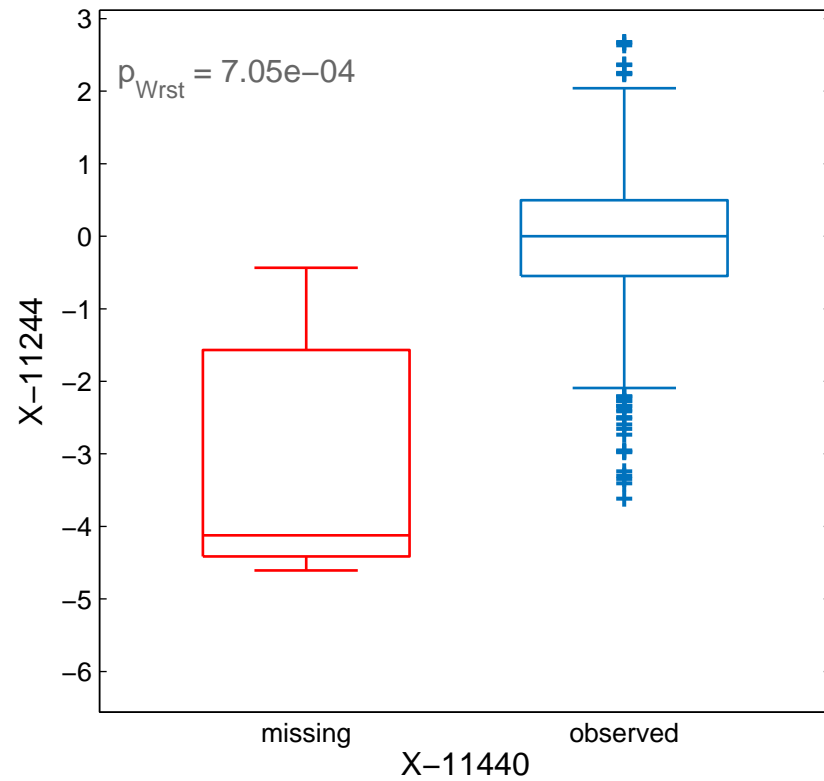



Missing values of X-11441  
in X-11442

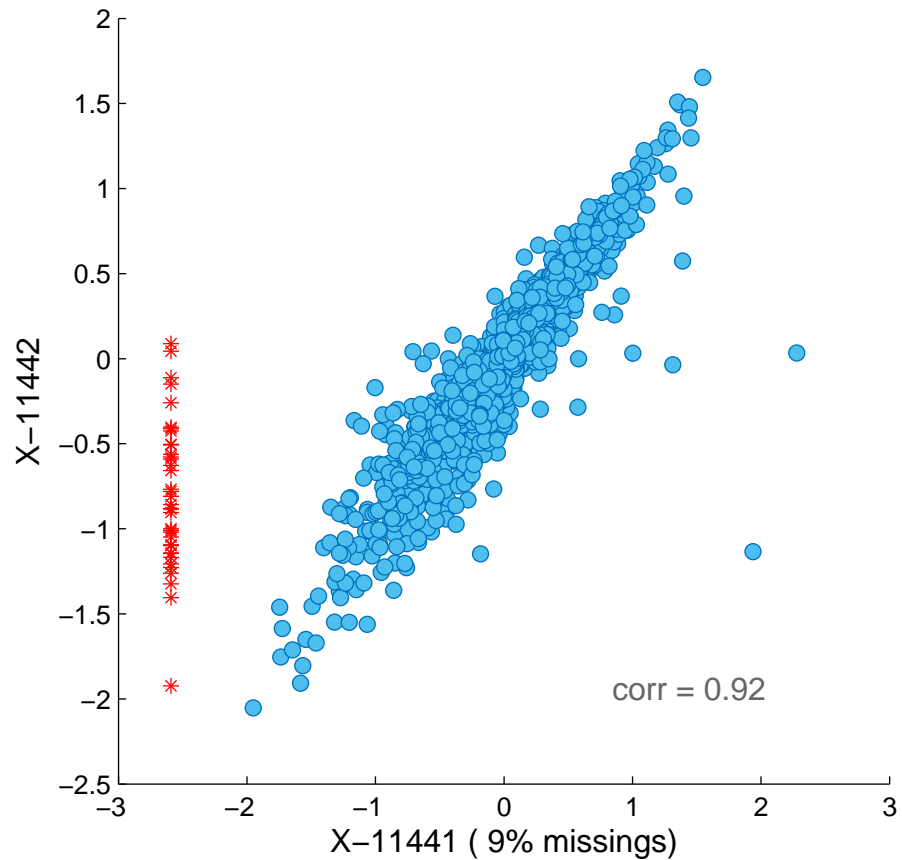

Concentrations of X-11442 in  
missing and observed X-11441

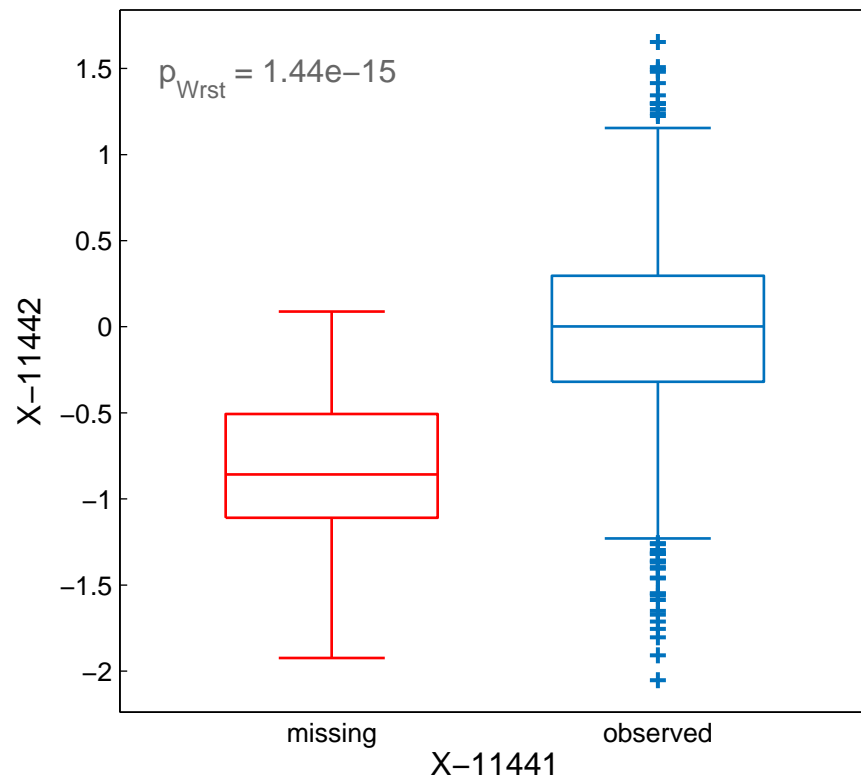

Missing values of X-11442  
in X-11441

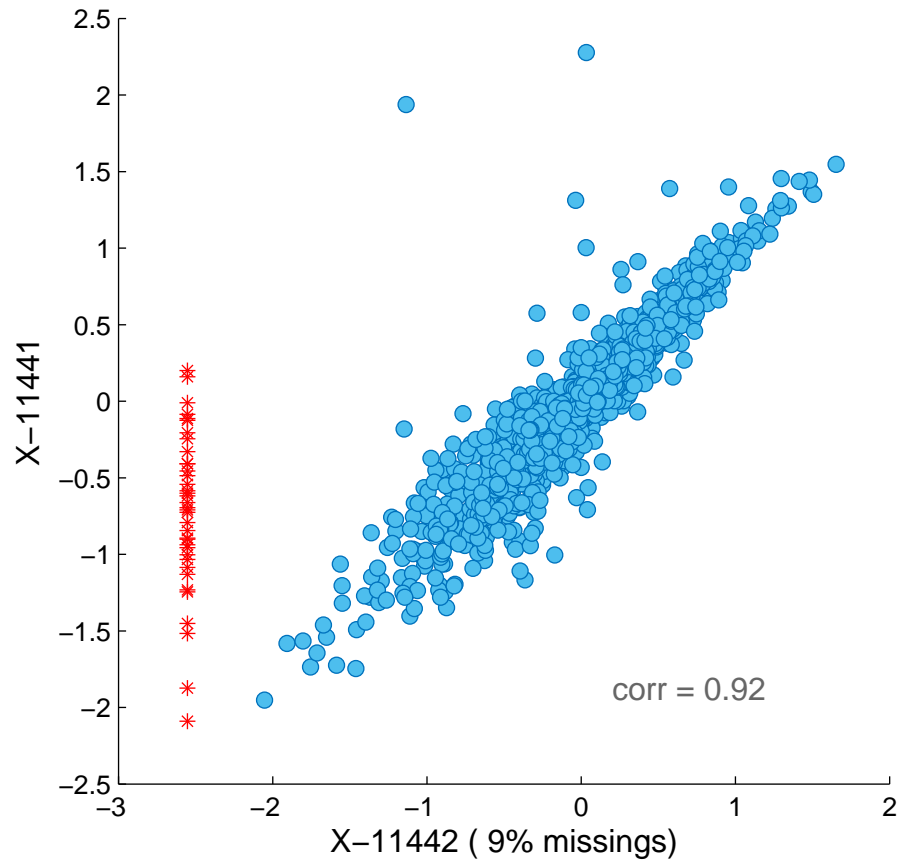

Concentrations of X-11441 in  
missing and observed X-11442

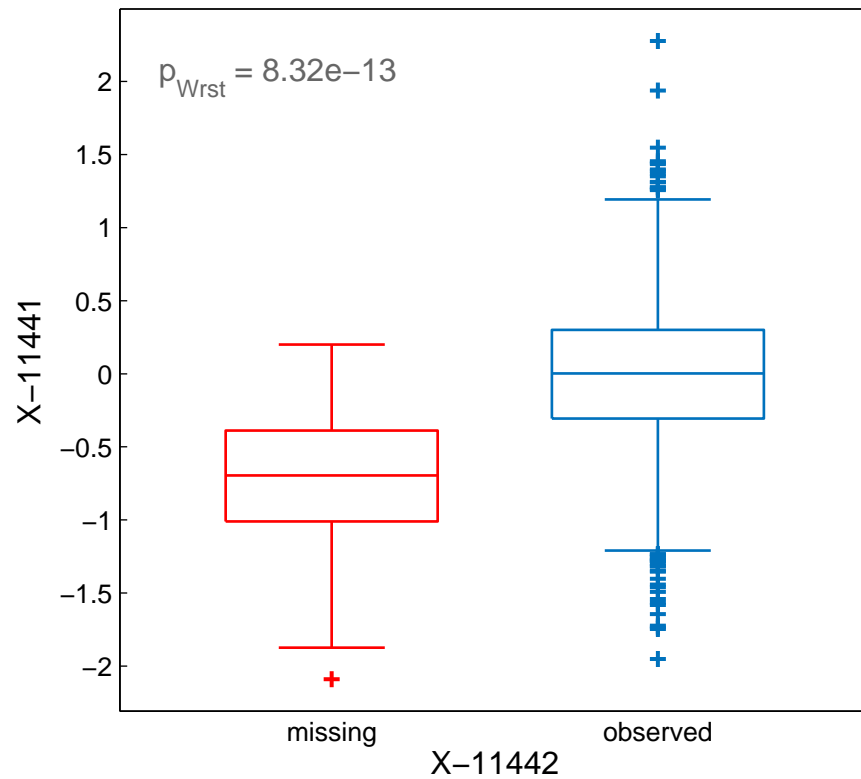

Missing values of X-11445  
in X-11244

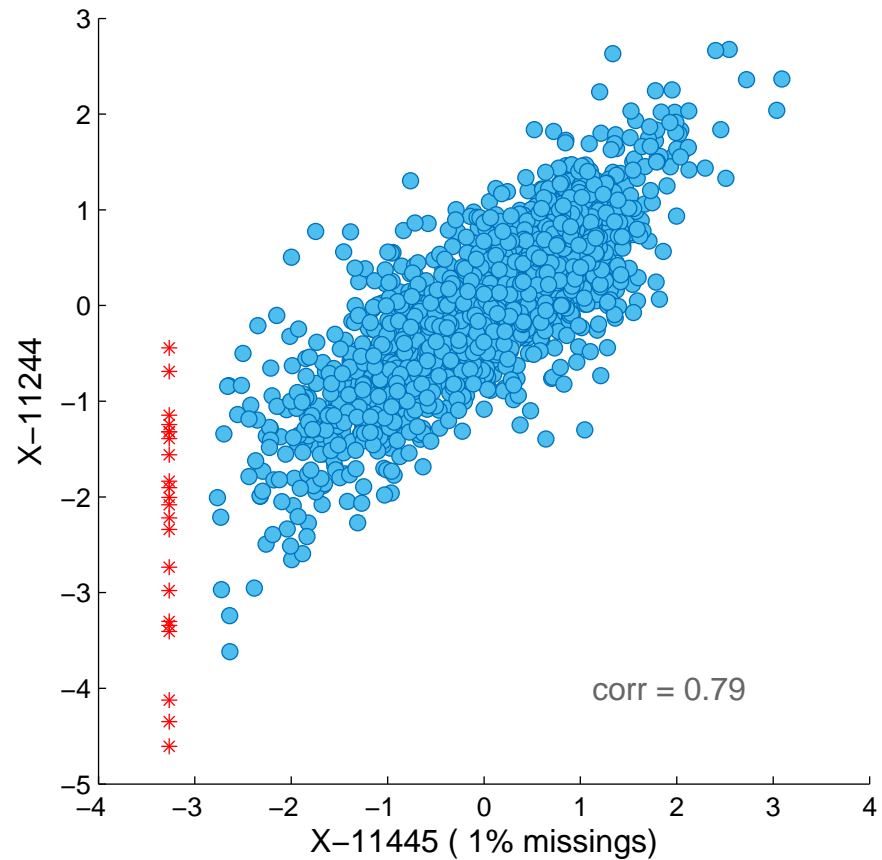

Concentrations of X-11244 in  
missing and observed X-11445

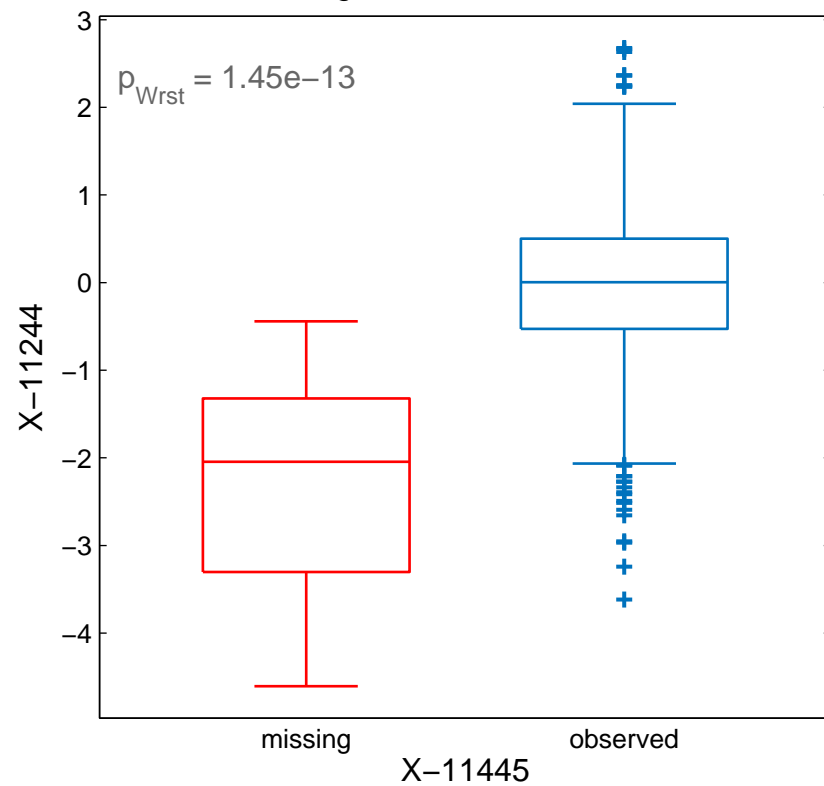

Missing values of X-11444  
in X-11470

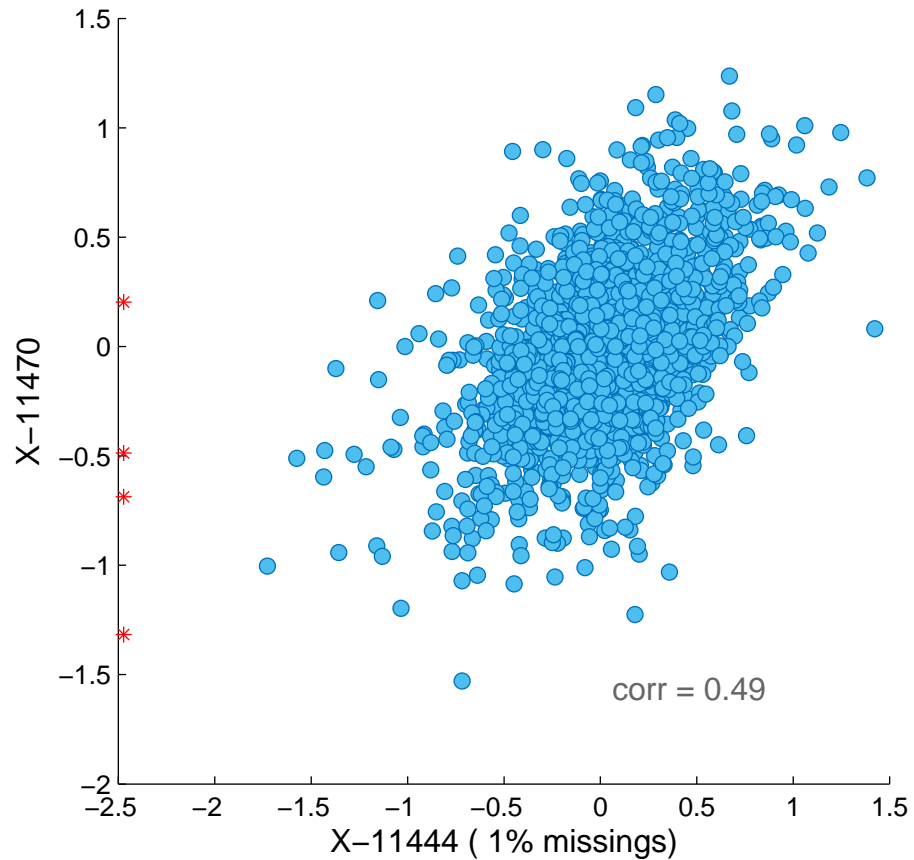

Concentrations of X-11470 in  
missing and observed X-11444

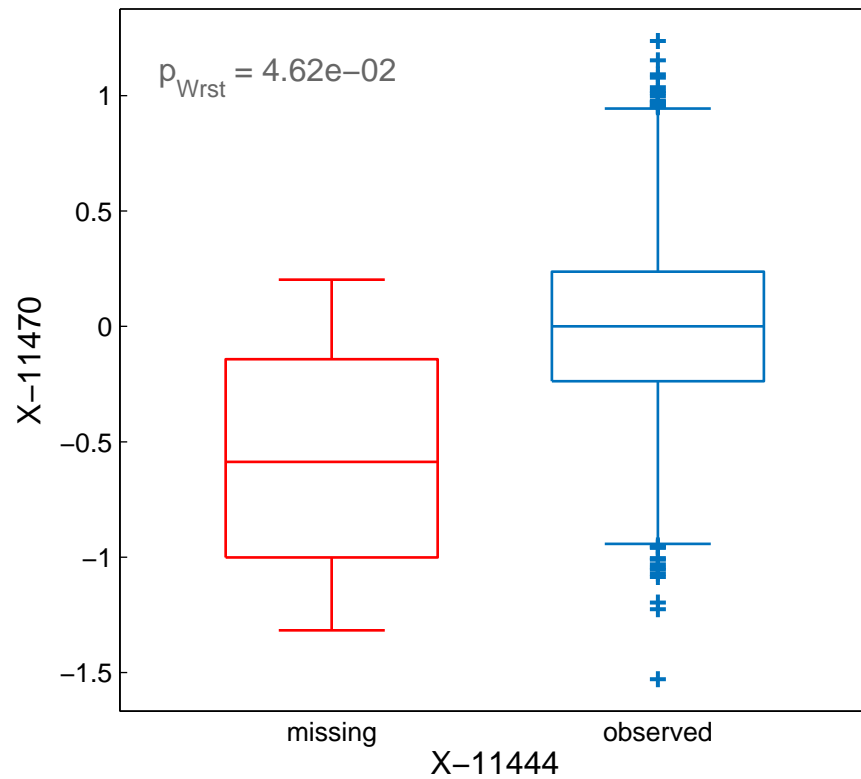

Missing values of X-11445  
in X-11440

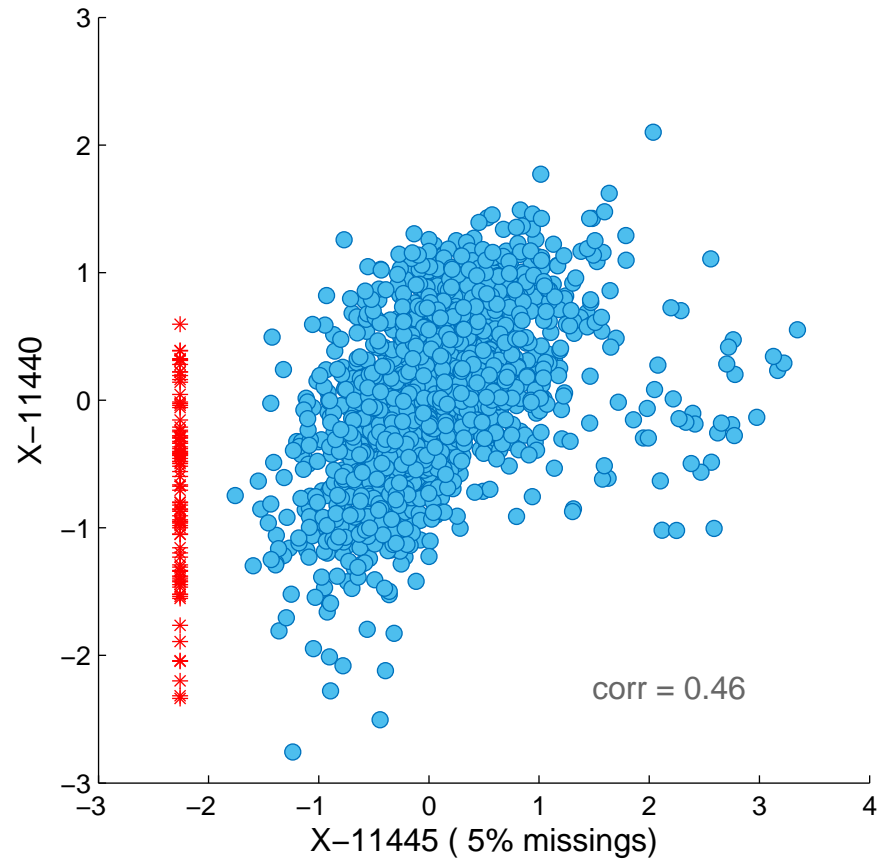

Concentrations of X-11440 in  
missing and observed X-11445

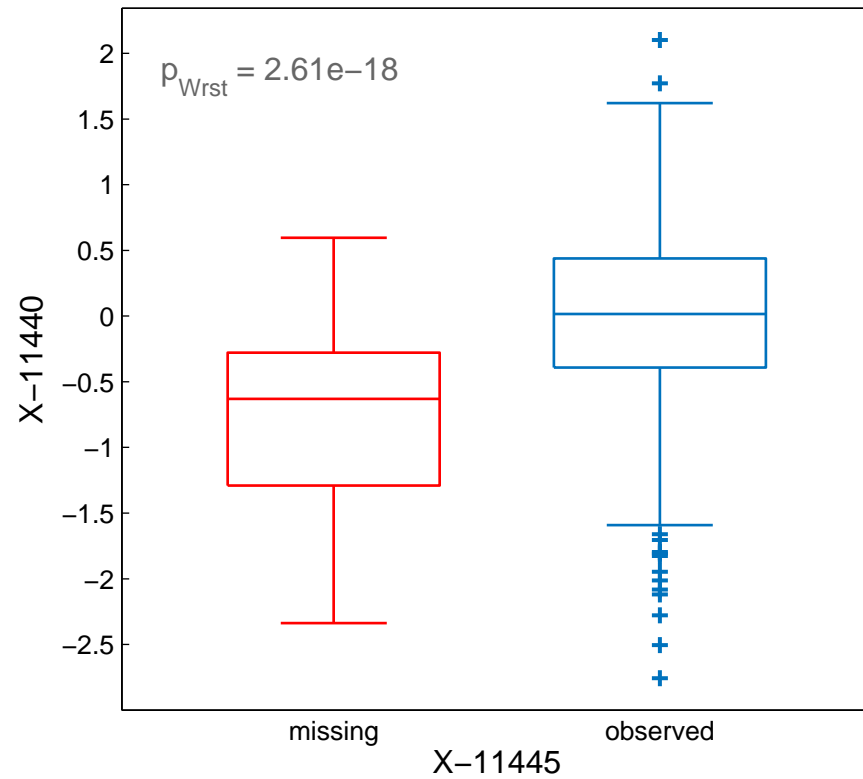

Missing values of 2-hydroxyhippurate (salicylurate) in salicylate

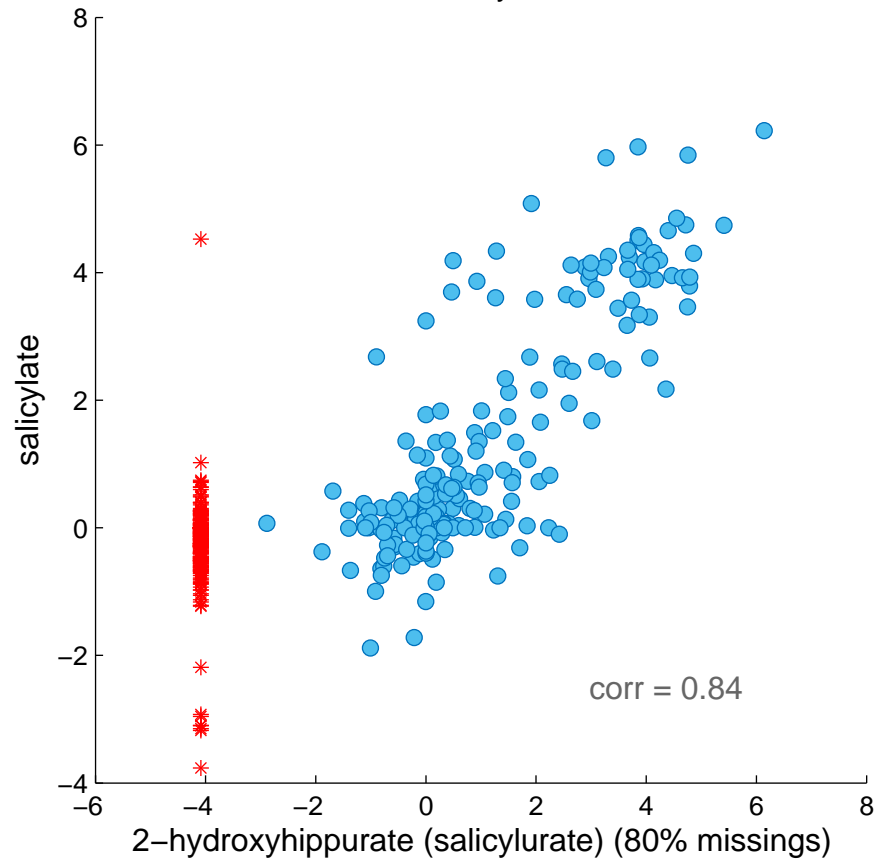

Concentrations of salicylate in missing and observed 2-hydroxyhippurate (salicylurate)

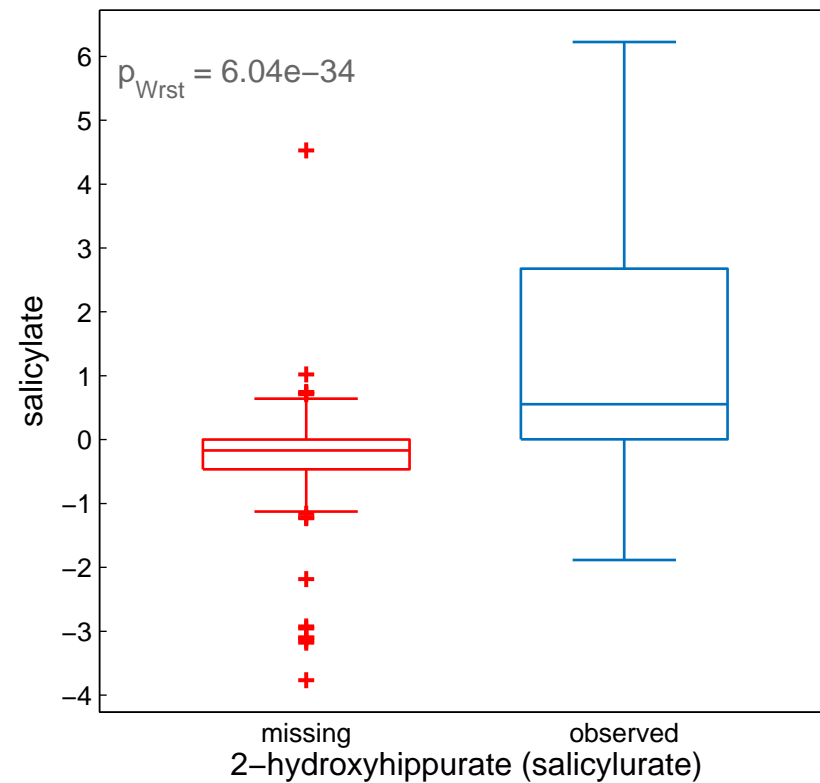

Missing values of X-11469  
in X-02269

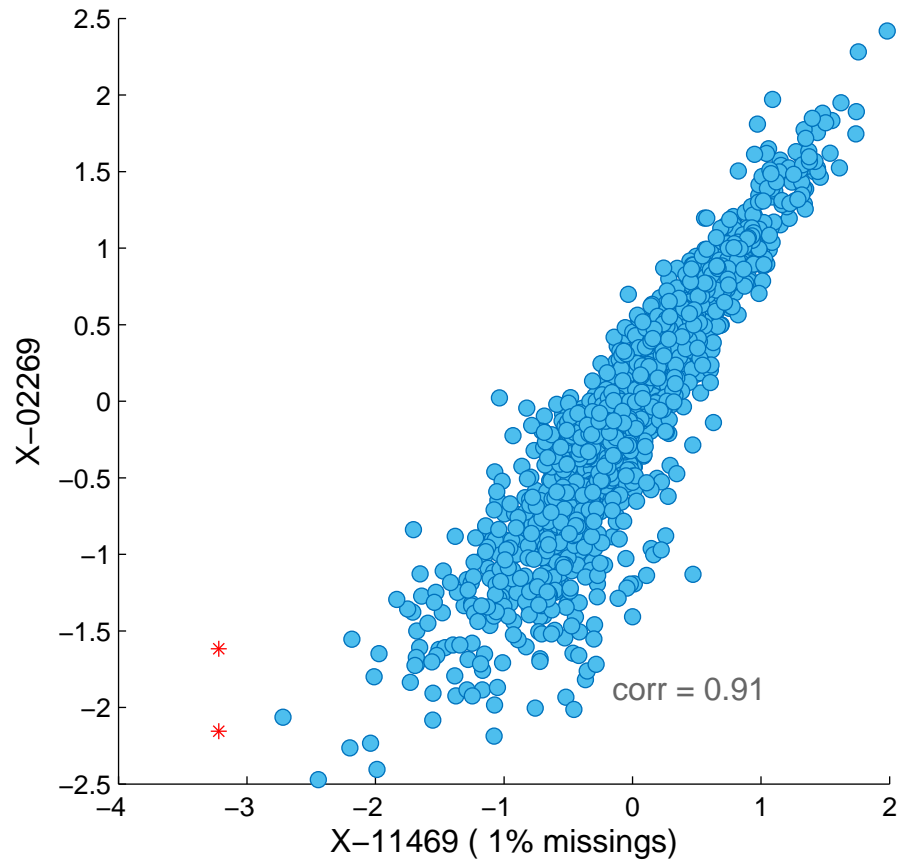

Concentrations of X-02269 in  
missing and observed X-11469

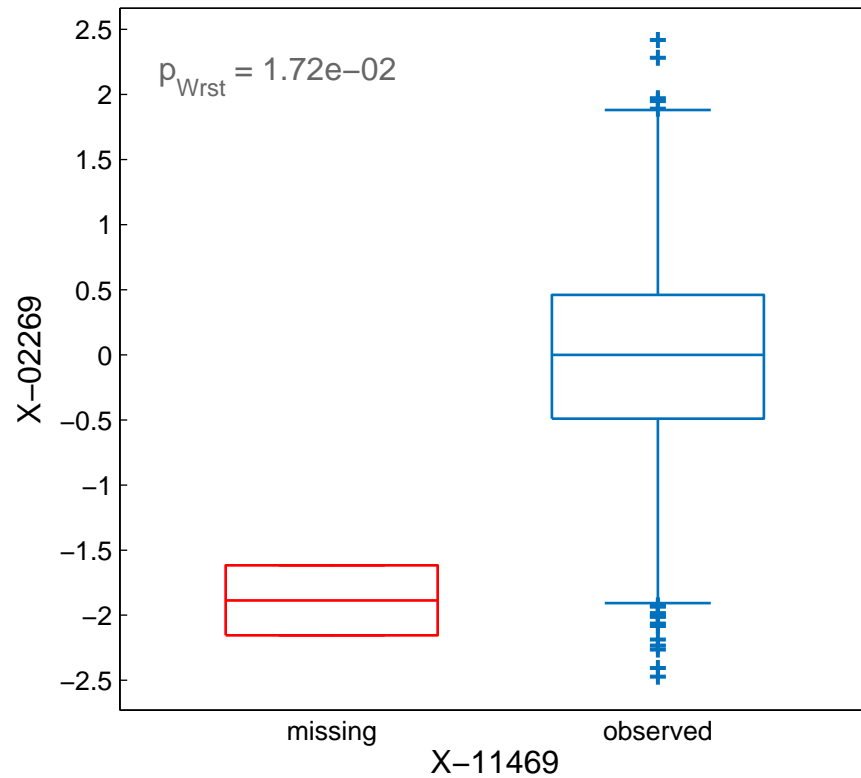

Missing values of X-11470  
in X-11444

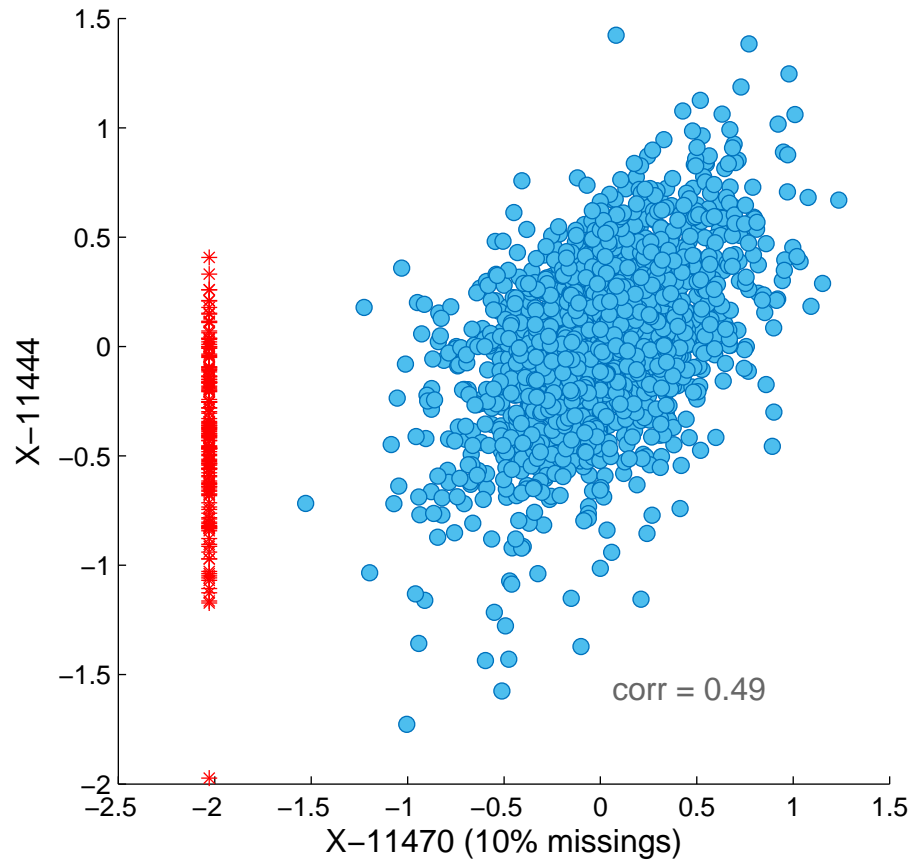

Concentrations of X-11444 in  
missing and observed X-11470

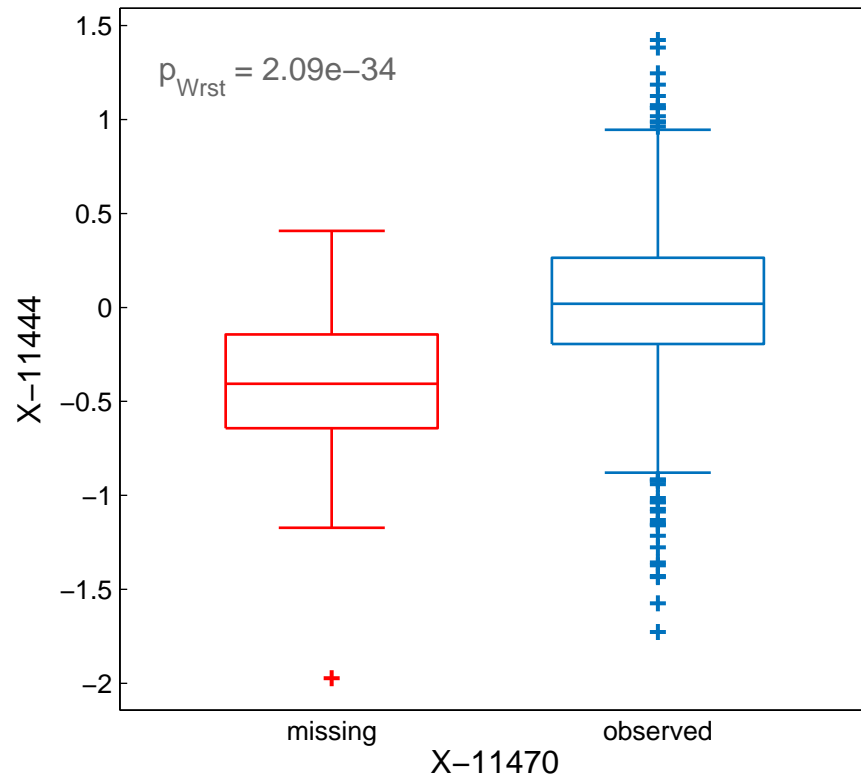



Missing values of X-11478  
in X-11261

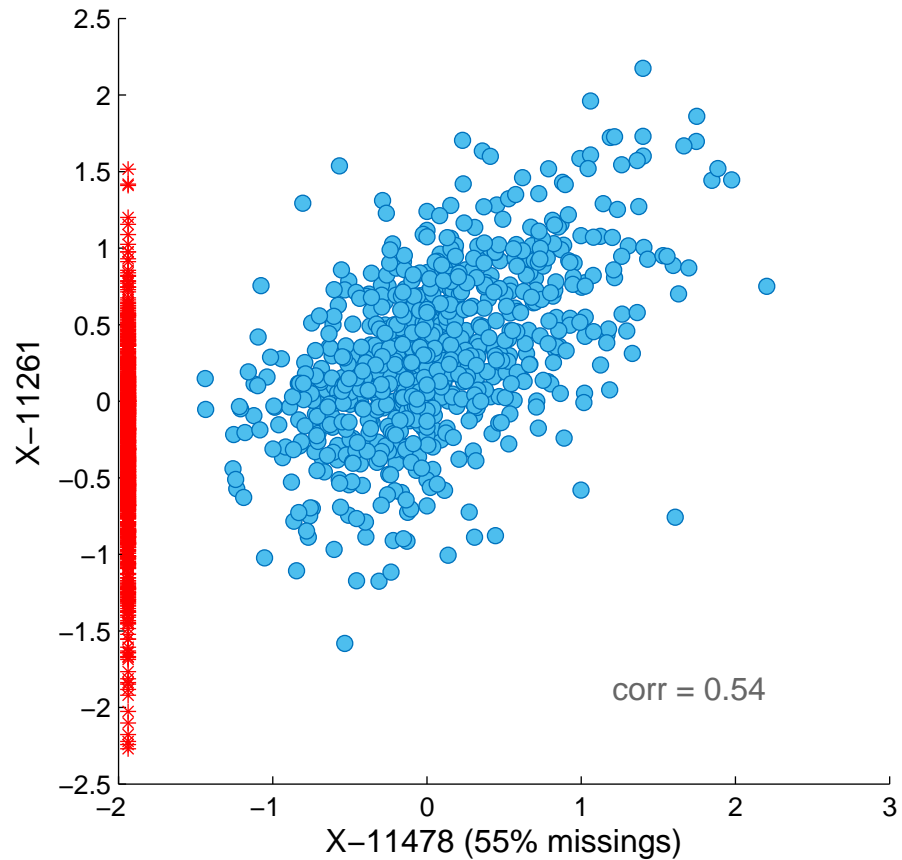

Concentrations of X-11261 in  
missing and observed X-11478

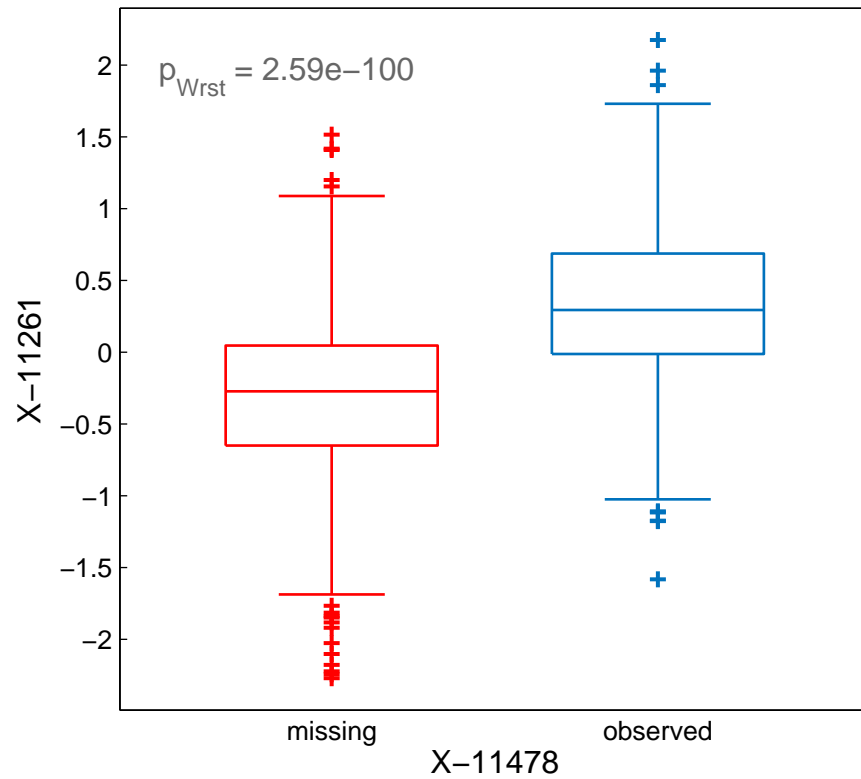

Missing values of X-11483  
in X-11299

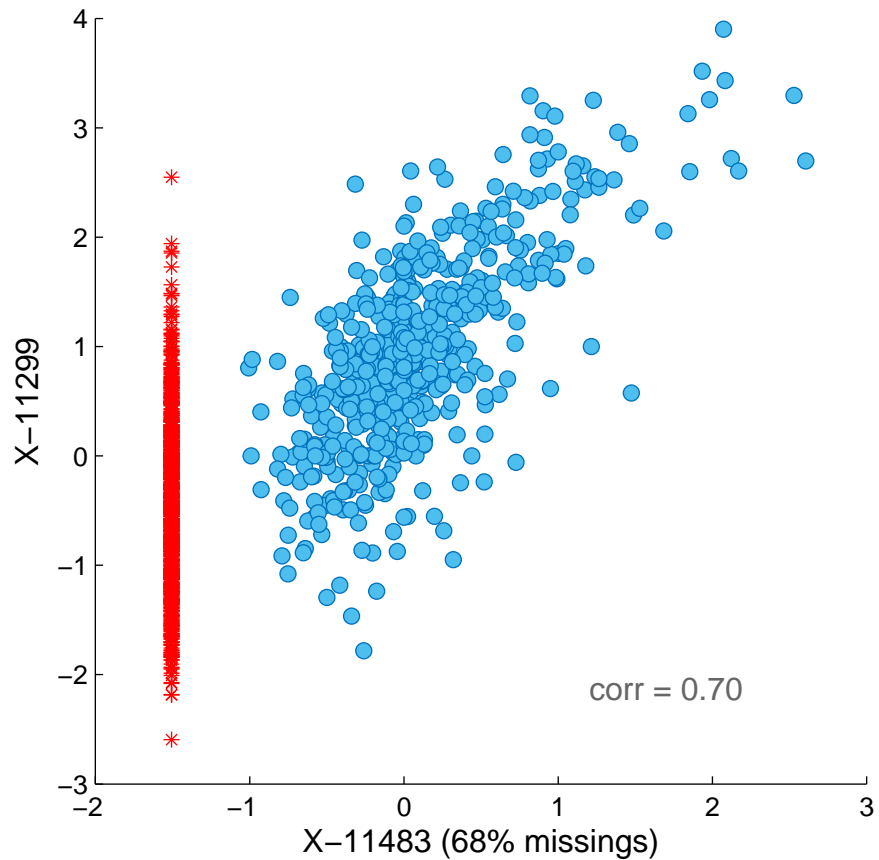

Concentrations of X-11299 in  
missing and observed X-11483

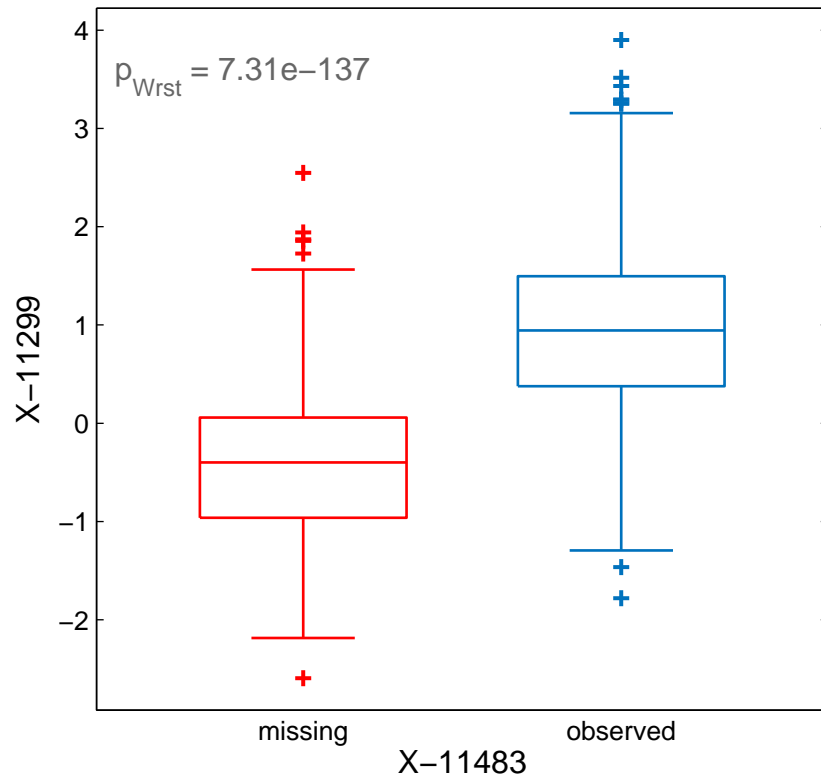

Missing values of X-11485  
in X-11452

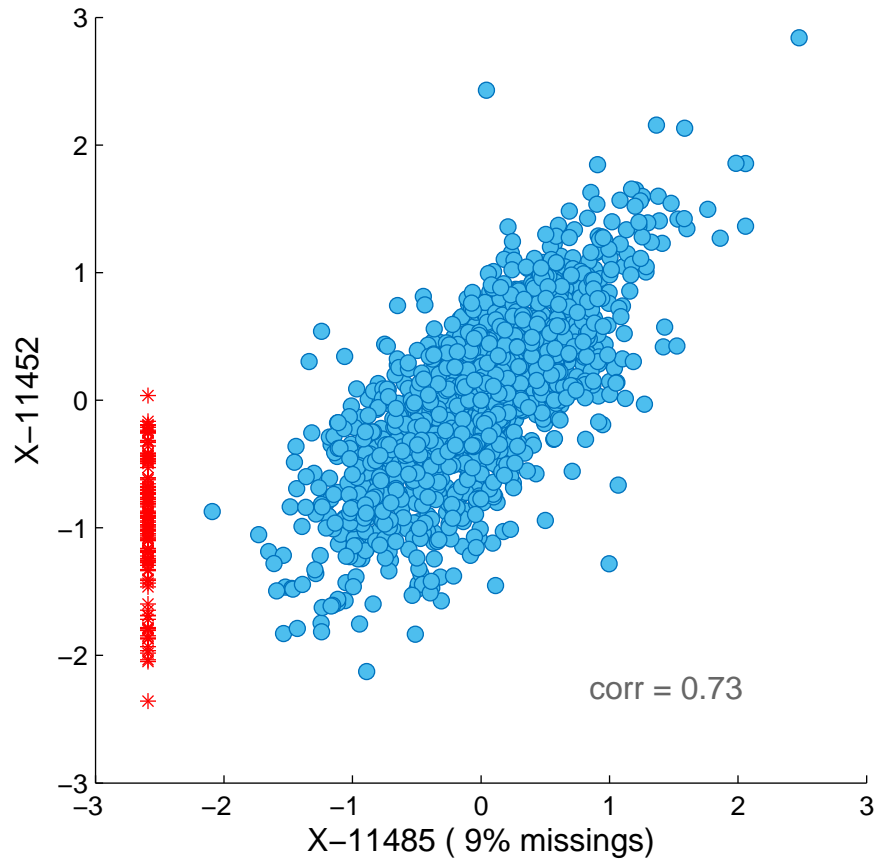

Concentrations of X-11452 in  
missing and observed X-11485

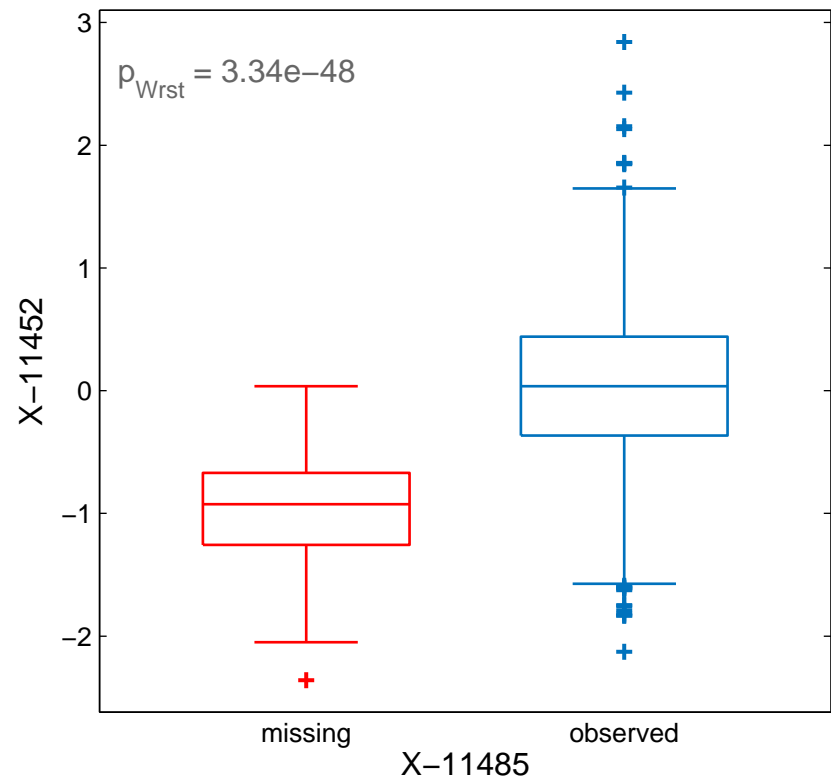

Missing values of X-11491  
in X-14662

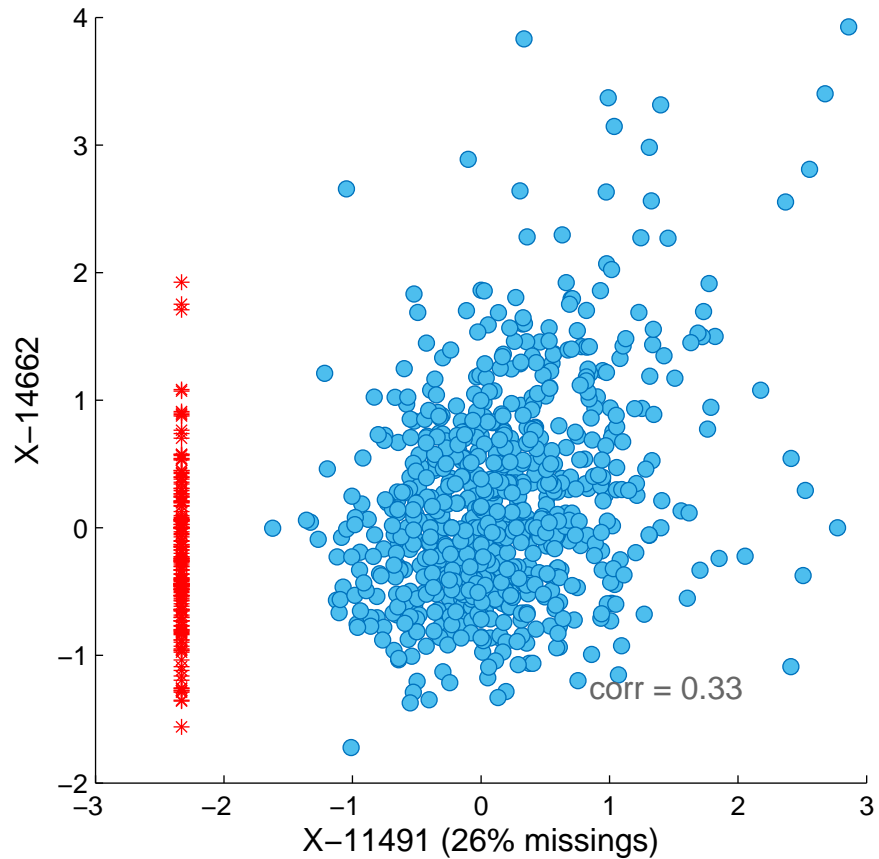

Concentrations of X-14662 in  
missing and observed X-11491

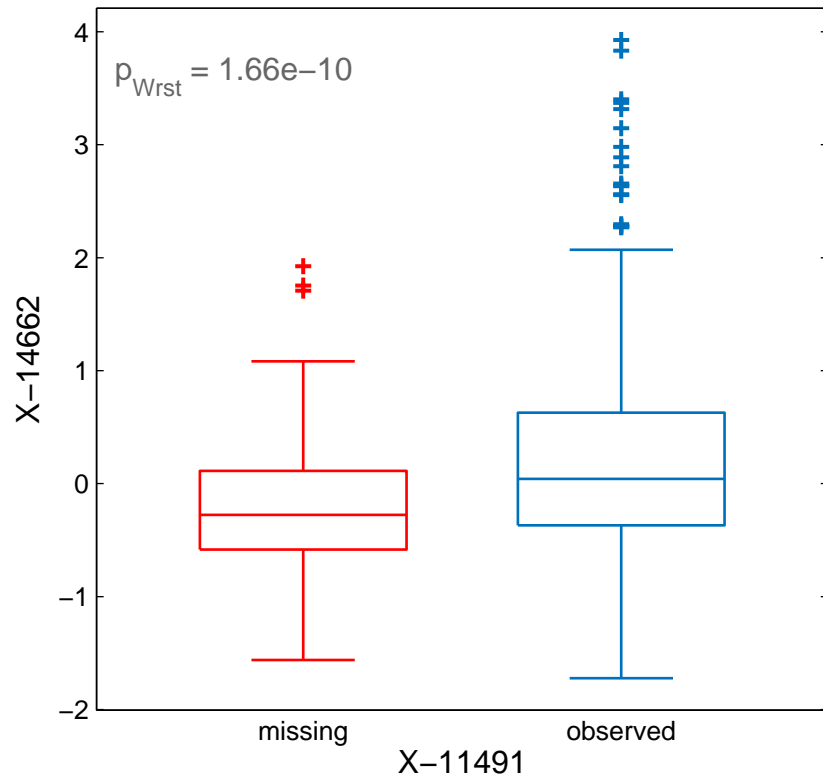

Missing values of X-11521  
in X-11261

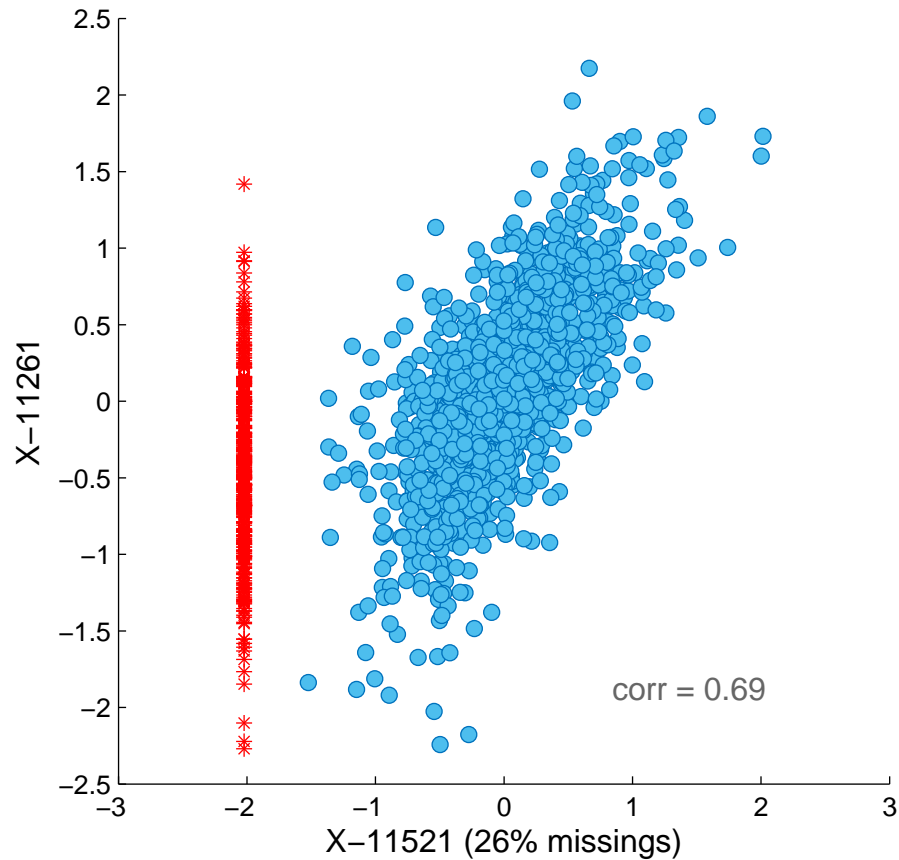

Concentrations of X-11261 in  
missing and observed X-11521

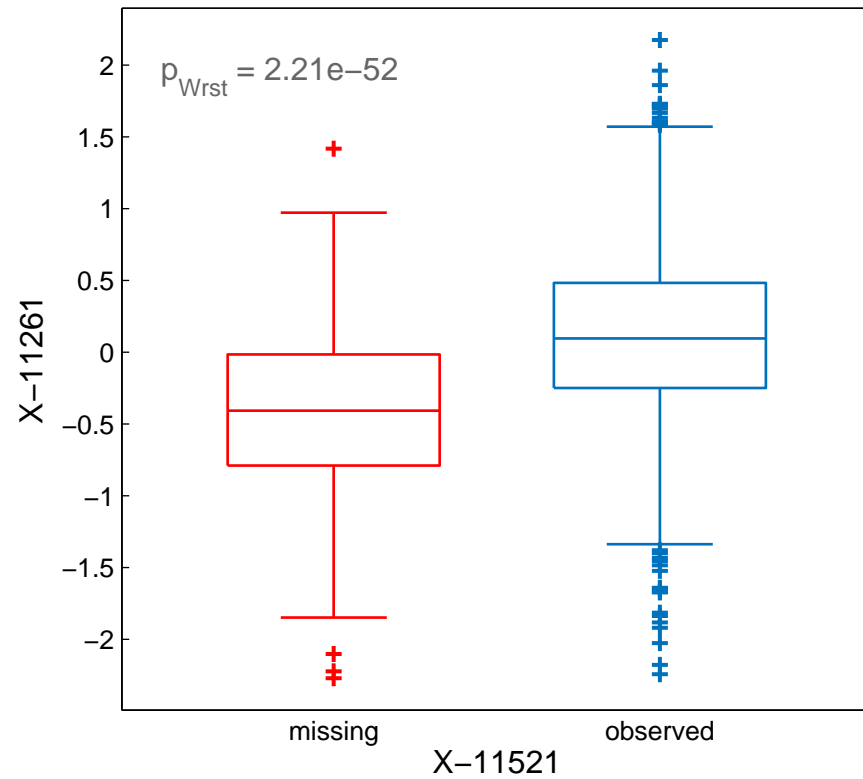

Missing values of X-11529  
in X-13429

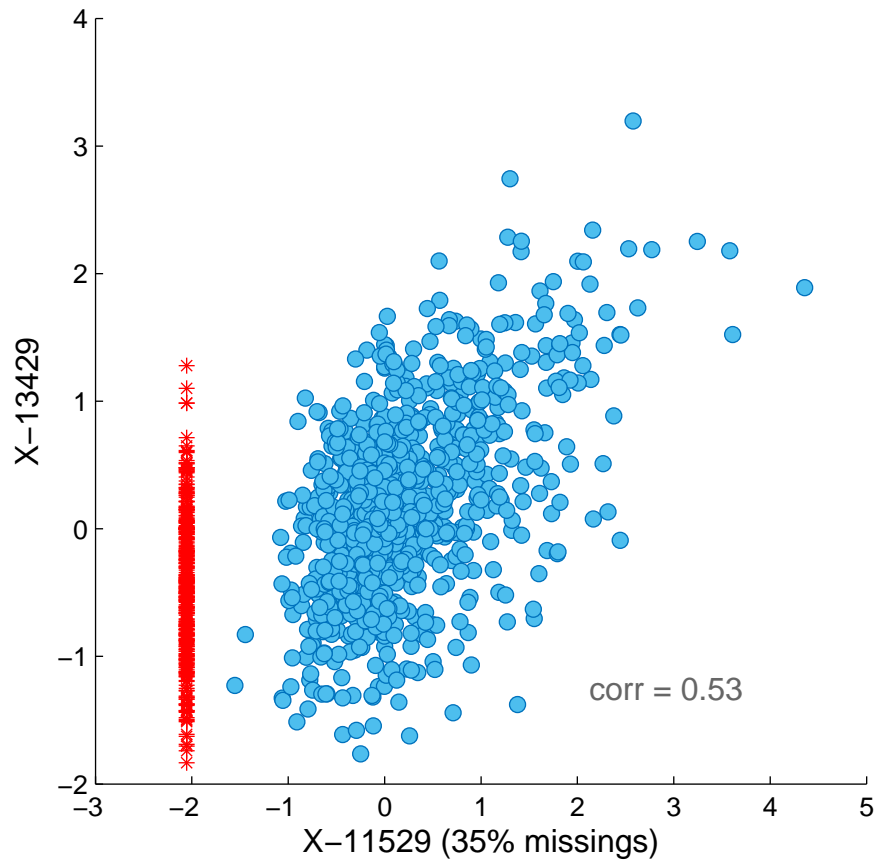

Concentrations of X-13429 in  
missing and observed X-11529

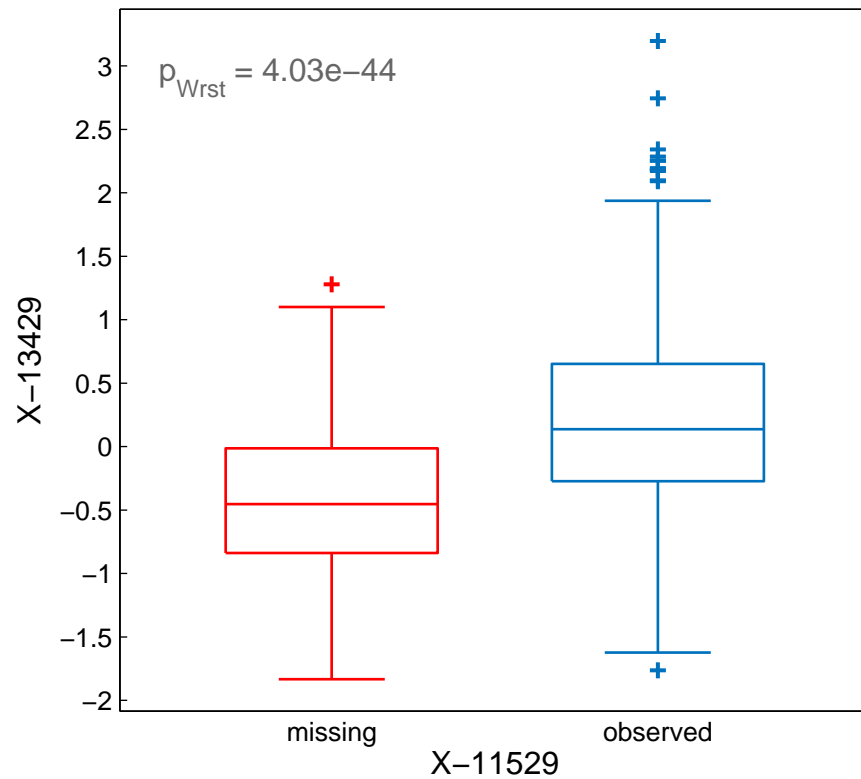

Missing values of 2-hydroxyisobutyrate  
in X-09706

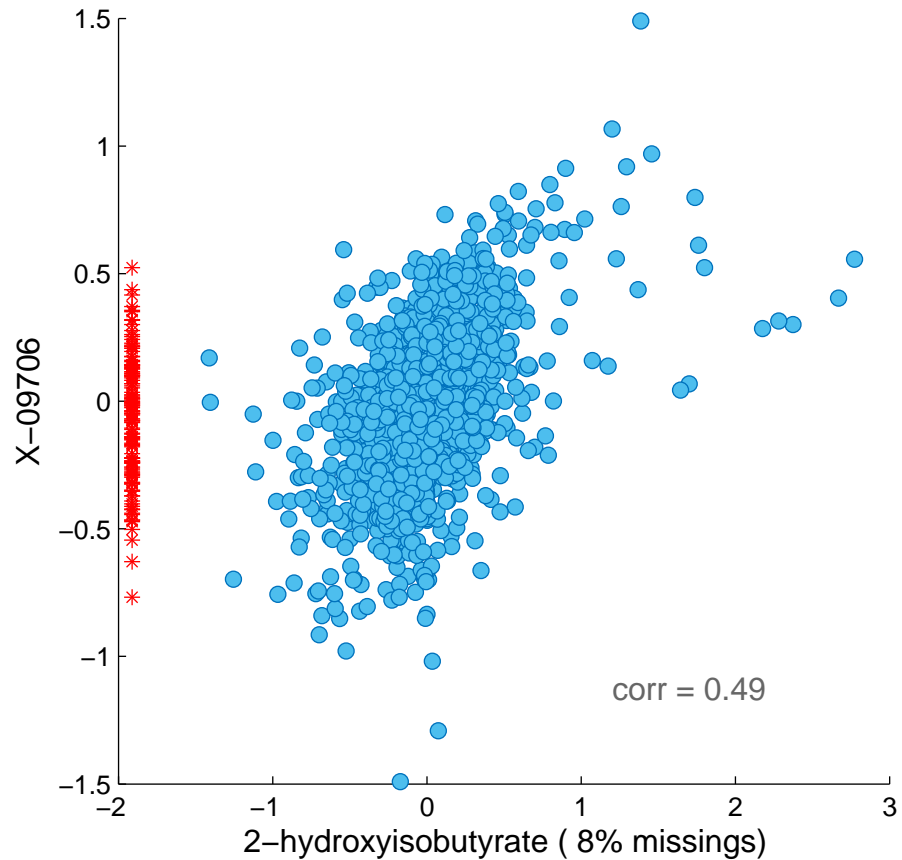

Concentrations of X-09706 in  
missing and observed 2-hydroxyisobutyrate

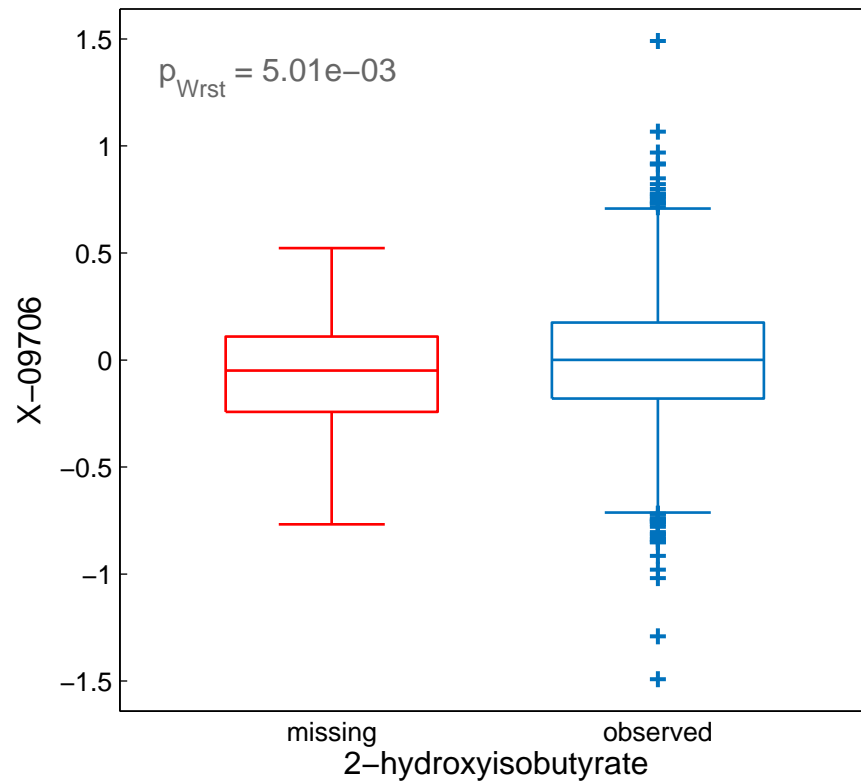

Missing values of X-11530  
in X-11442

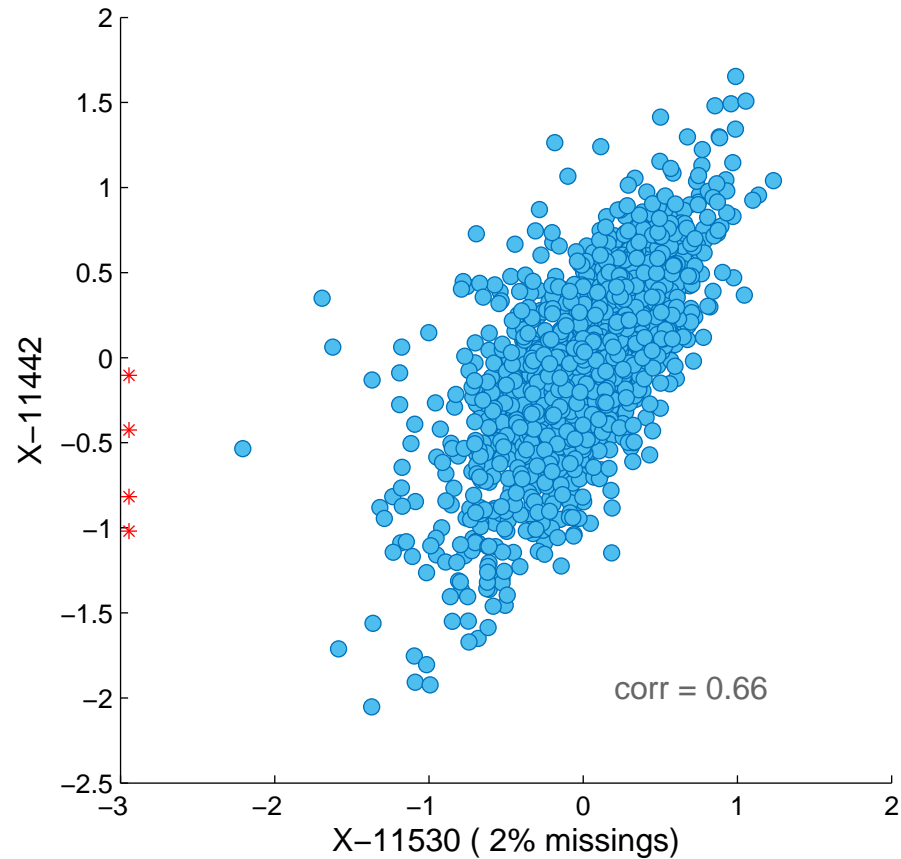

Concentrations of X-11442 in  
missing and observed X-11530

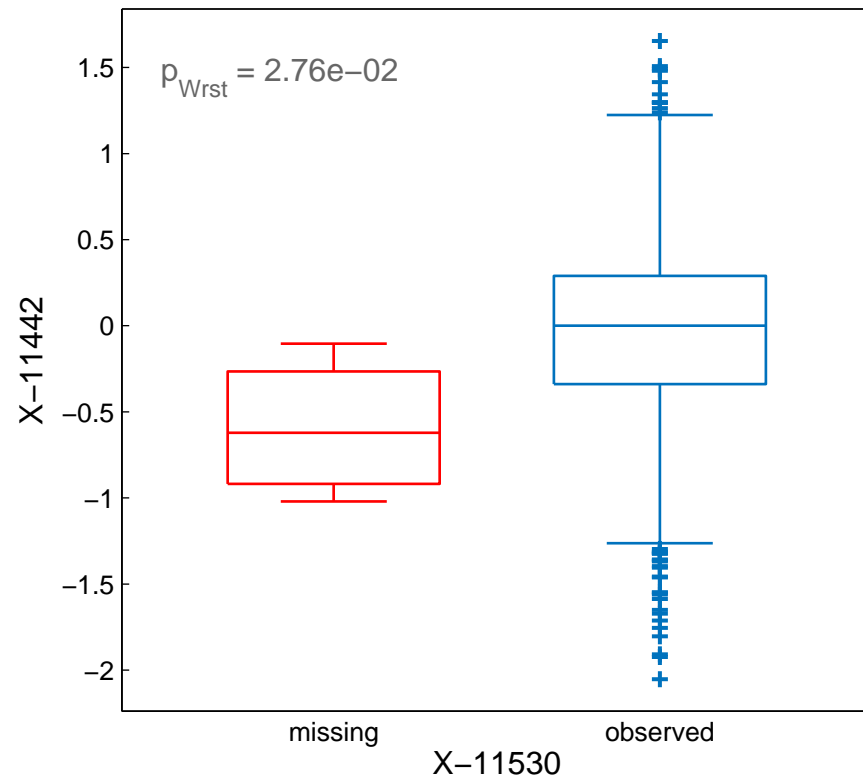



Missing values of X-11537  
in X-11540

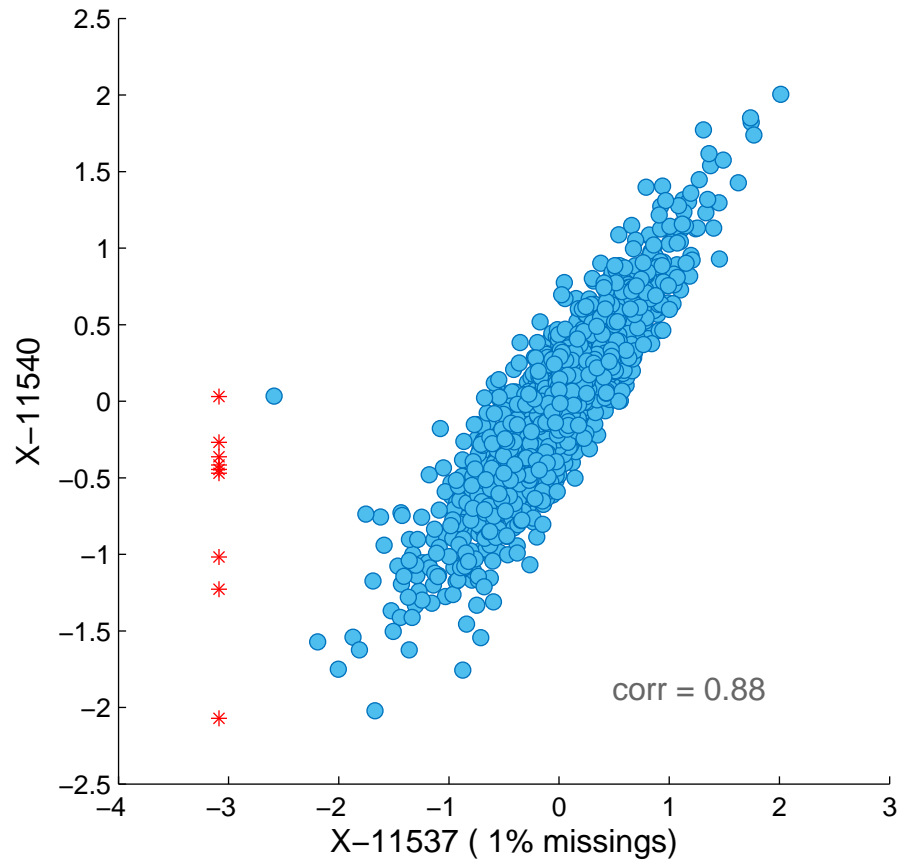

Concentrations of X-11540 in  
missing and observed X-11537

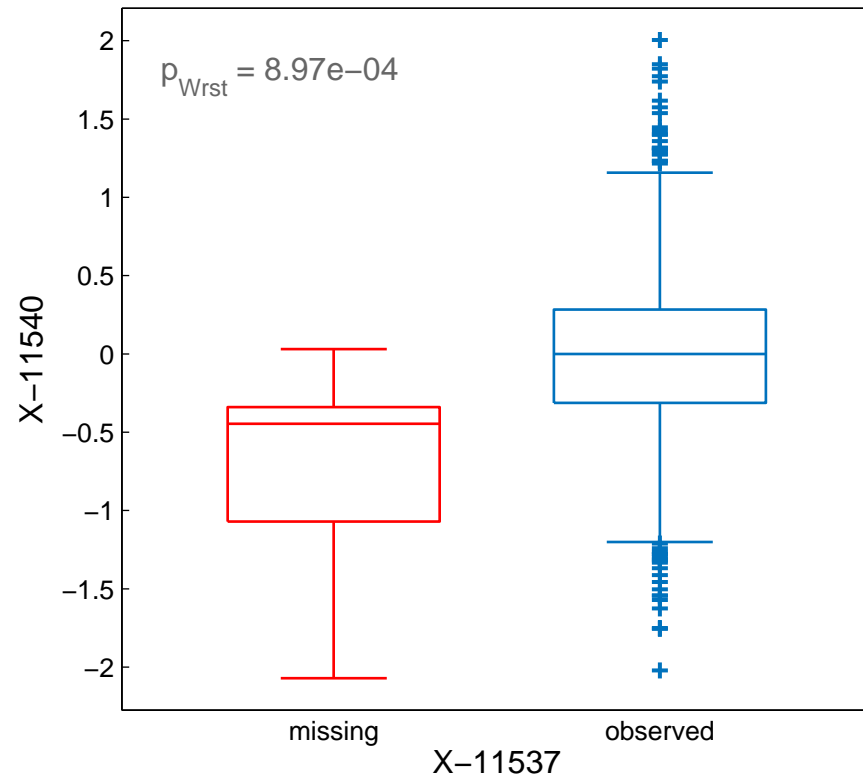

Missing values of X-11540  
in X-11537

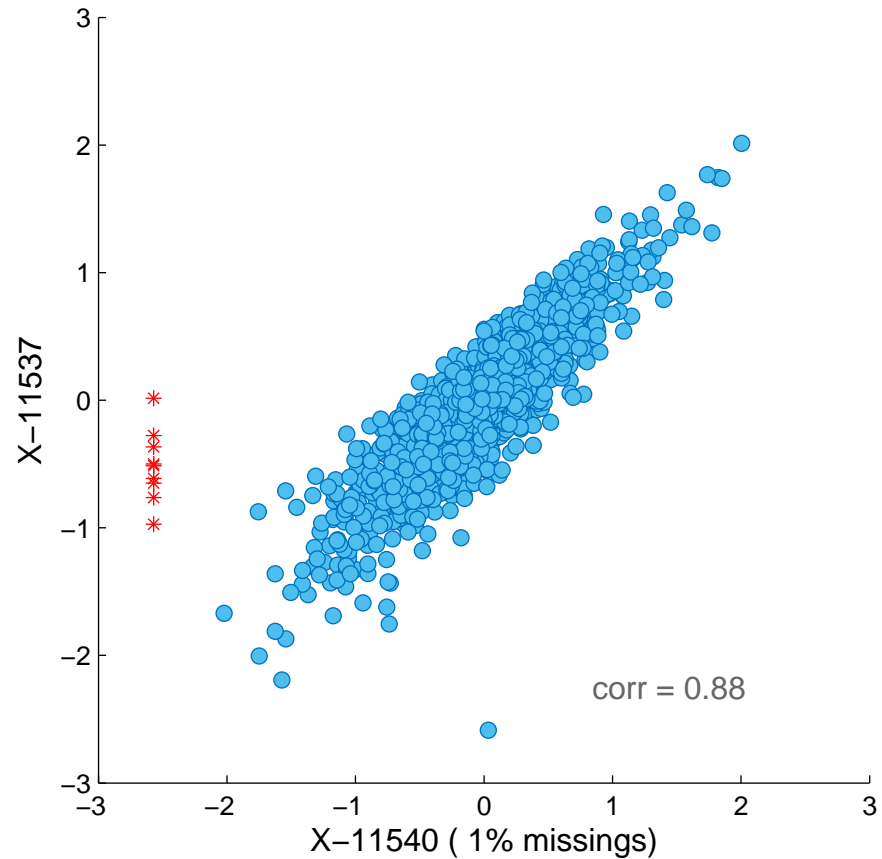

Concentrations of X-11537 in  
missing and observed X-11540

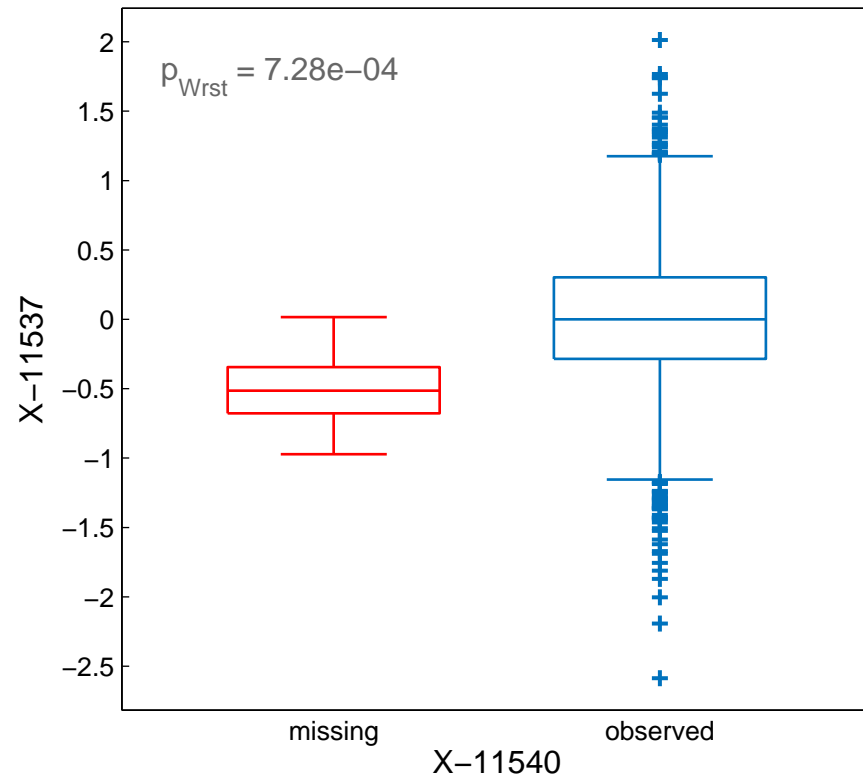

Missing values of X-11546  
in glycochenodeoxycholate+glycodeoxycholate

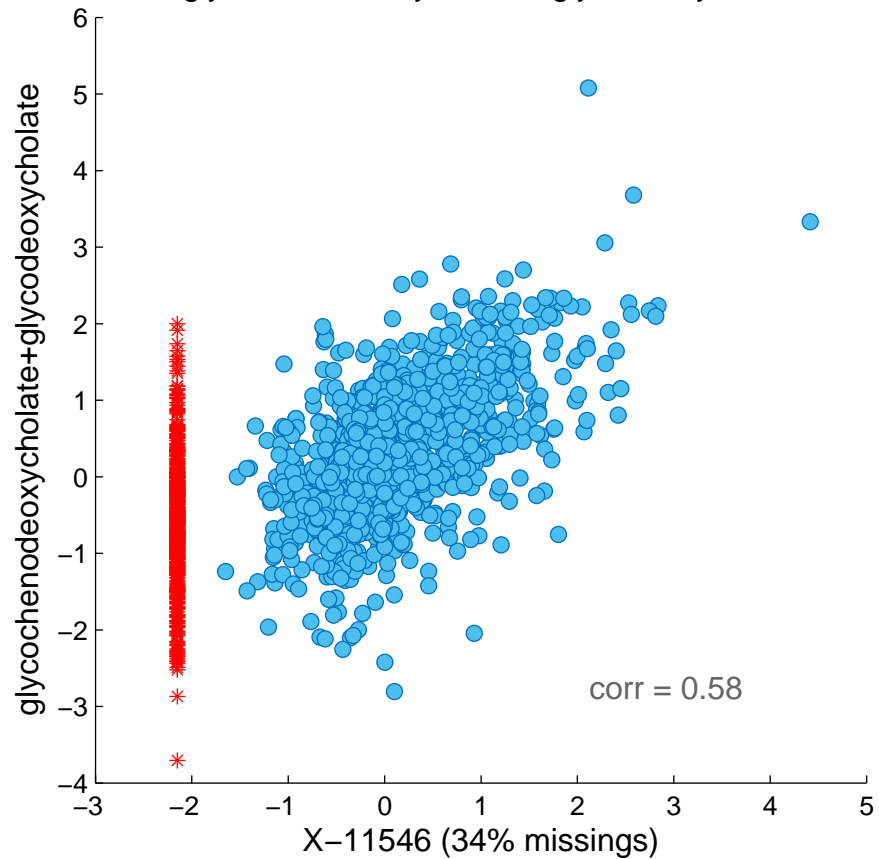

Concentrations of glycochenodeoxycholate+glycodeoxycholate in  
missing and observed X-11546

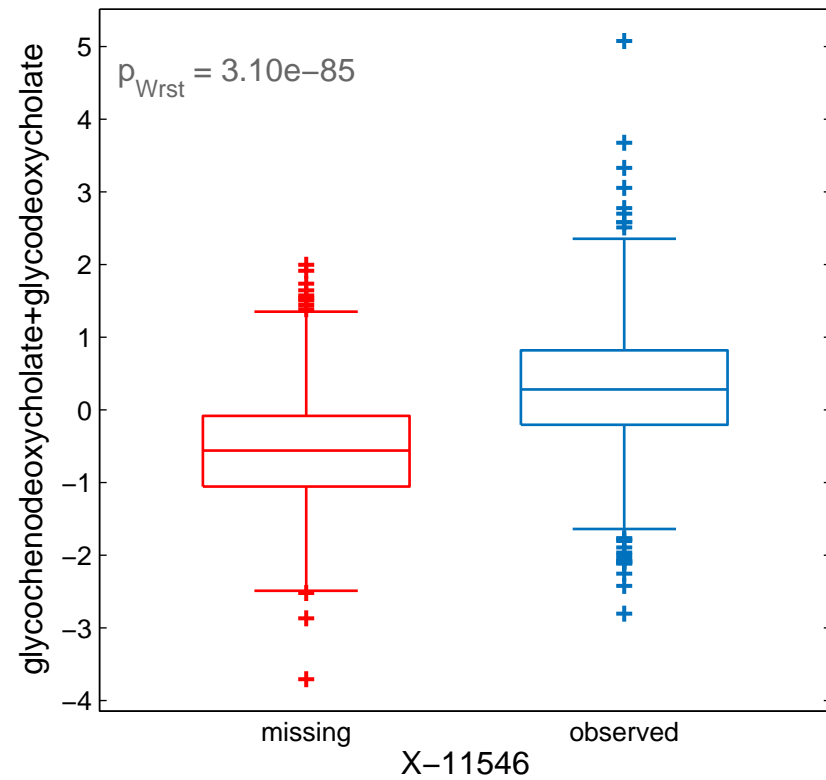

Missing values of X-11552  
in oleamide

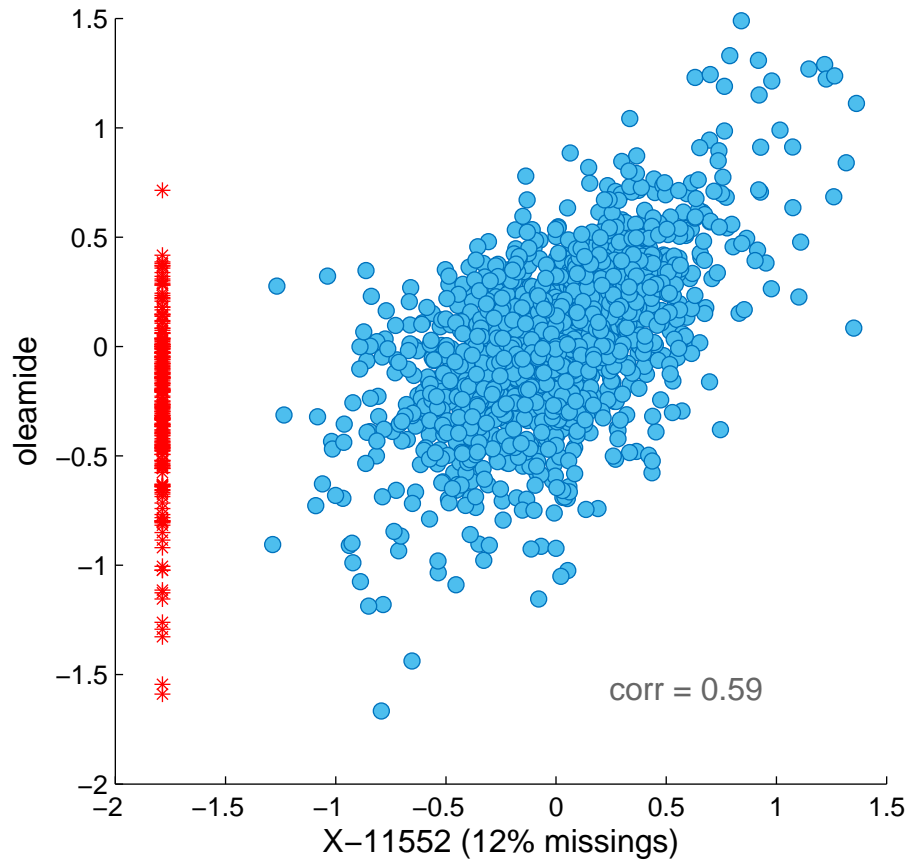

Concentrations of oleamide in  
missing and observed X-11552

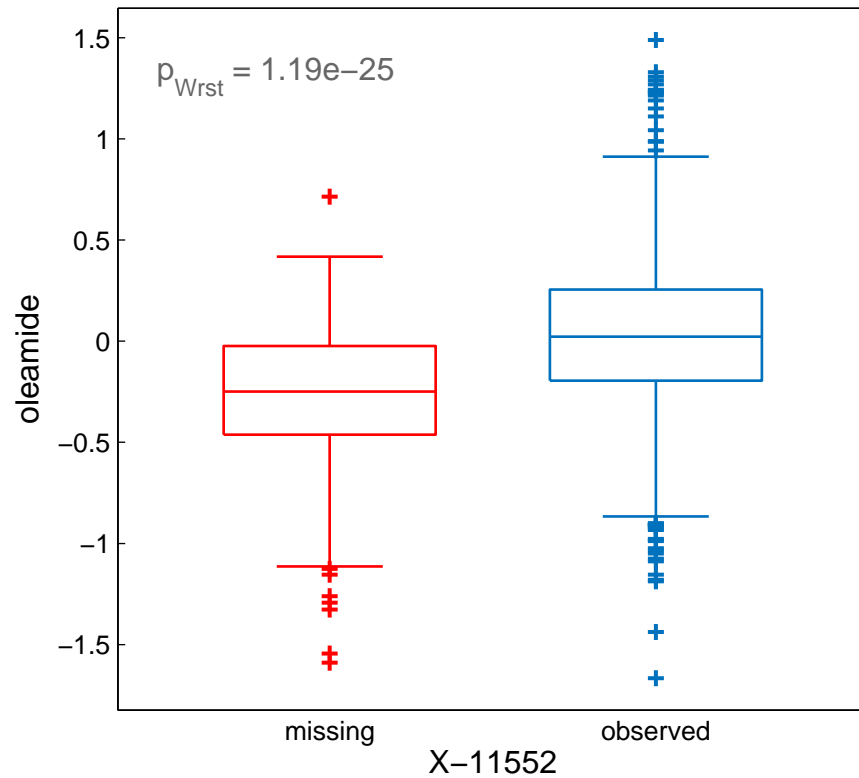

Missing values of X-11792  
in cotinine

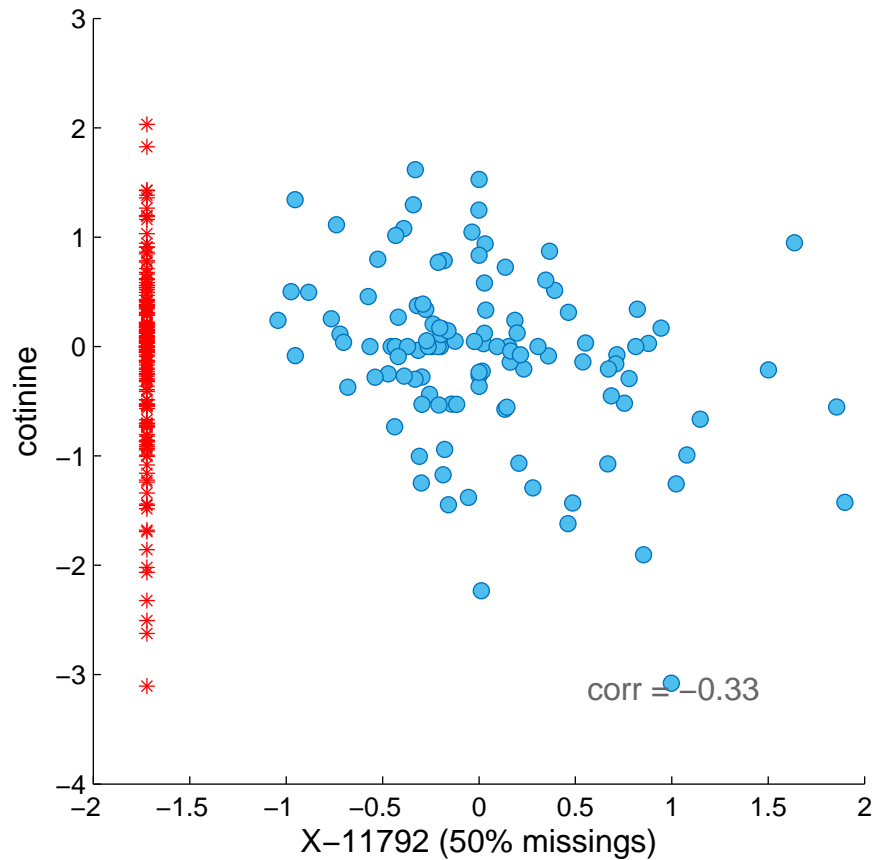

Concentrations of cotinine in  
missing and observed X-11792

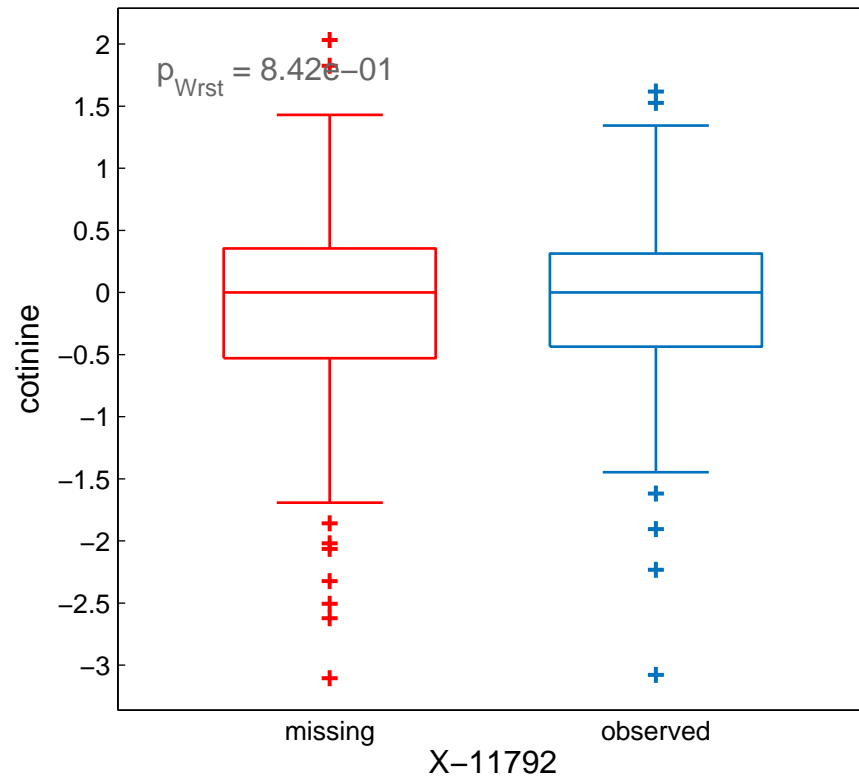

Missing values of X-11793  
in bilirubin (E,E)

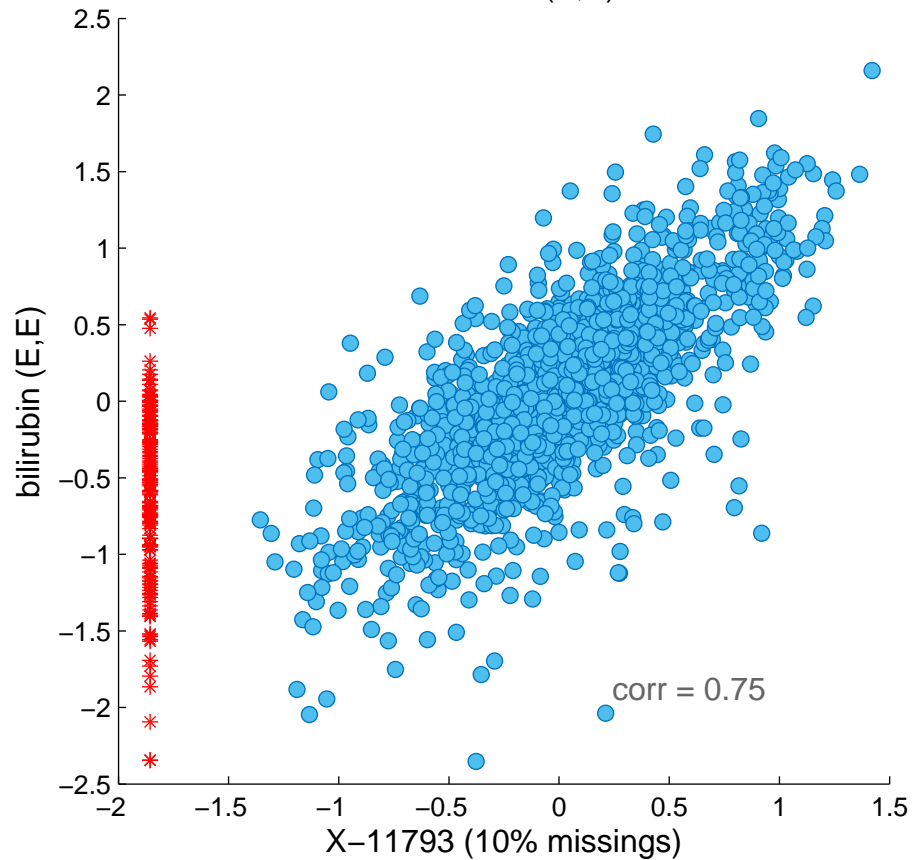

Concentrations of bilirubin (E,E) in  
missing and observed X-11793

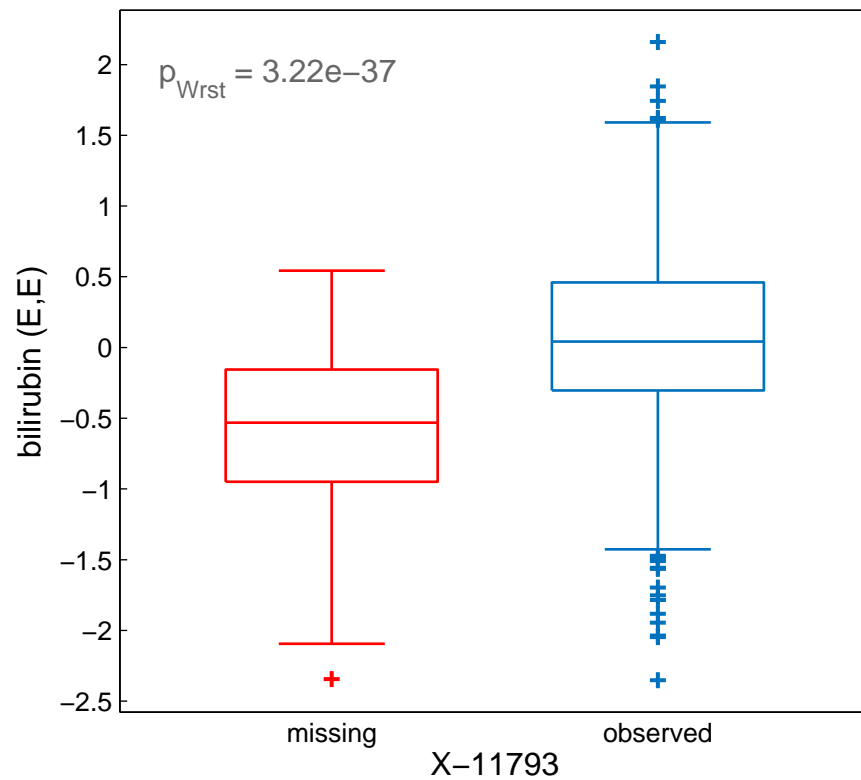

Missing values of X-11799  
in scyllo-inositol

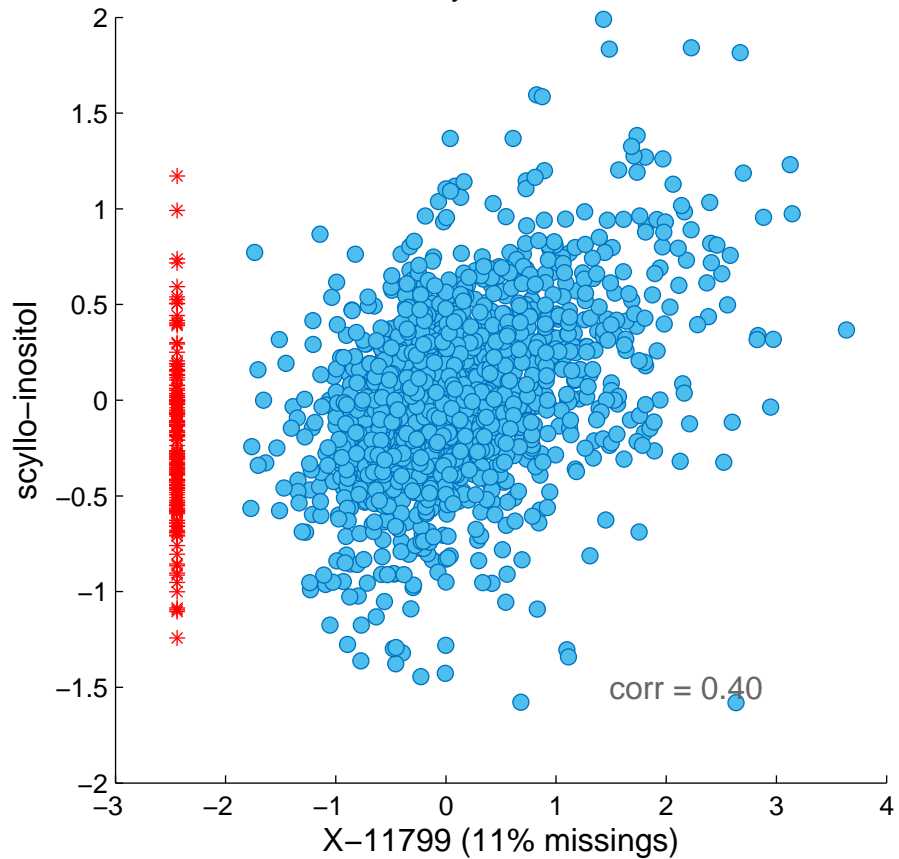

Concentrations of scyllo-inositol in  
missing and observed X-11799

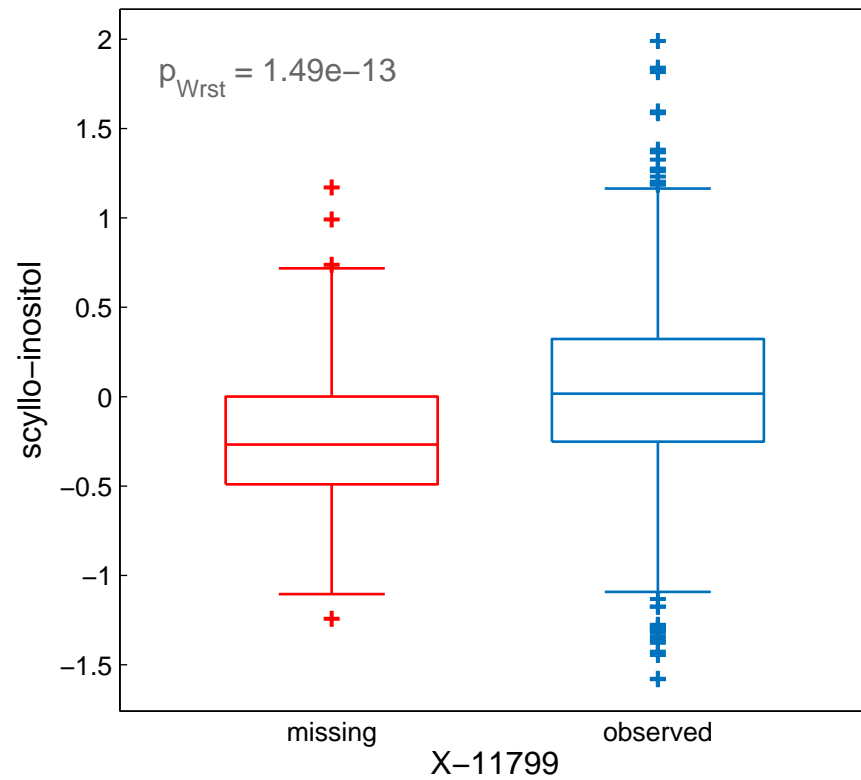

Missing values of X-11820  
in oleoylcarnitine

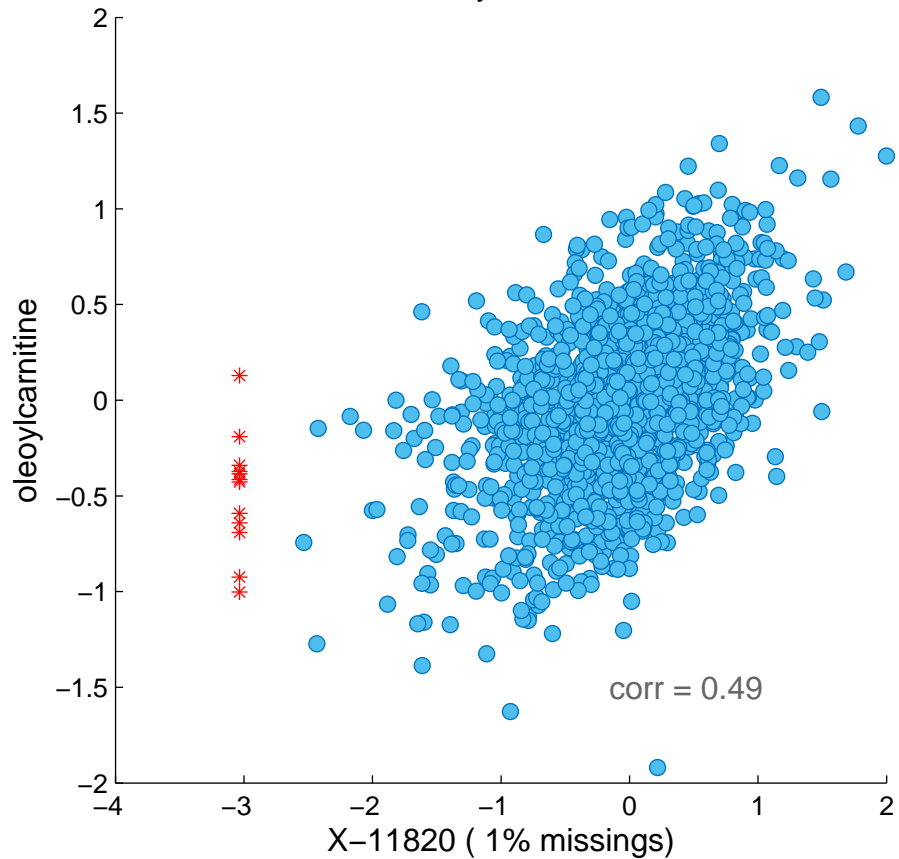

Concentrations of oleoylcarnitine in  
missing and observed X-11820

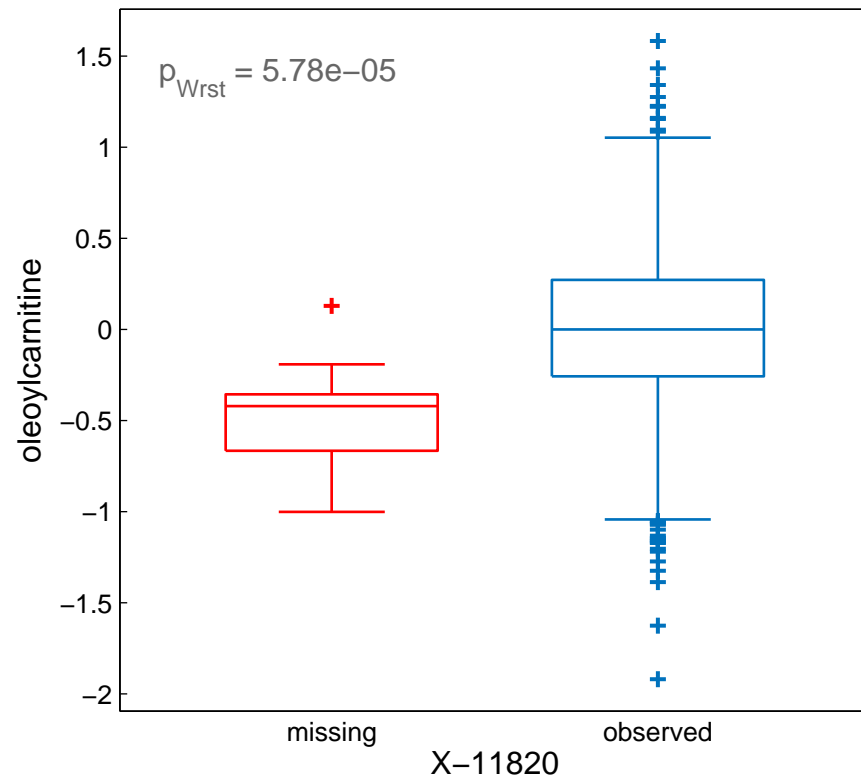



Missing values of 4-hydroxyhippurate  
in X-12717

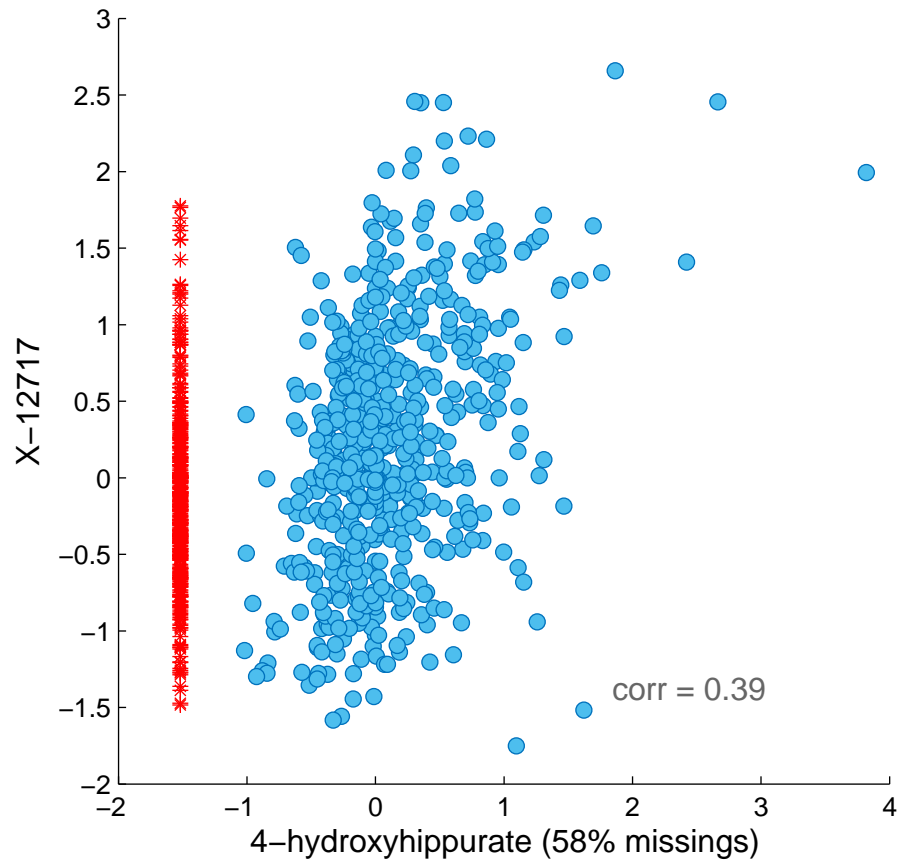

Concentrations of X-12717 in  
missing and observed 4-hydroxyhippurate

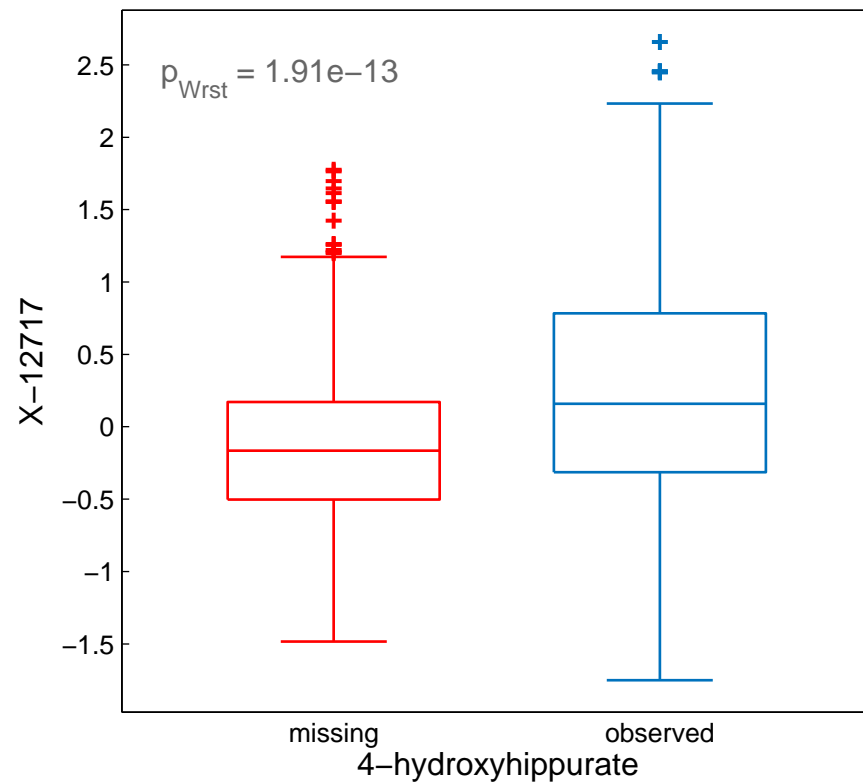

Missing values of 2-hydroxystearate  
in 2-hydroxypalmitate

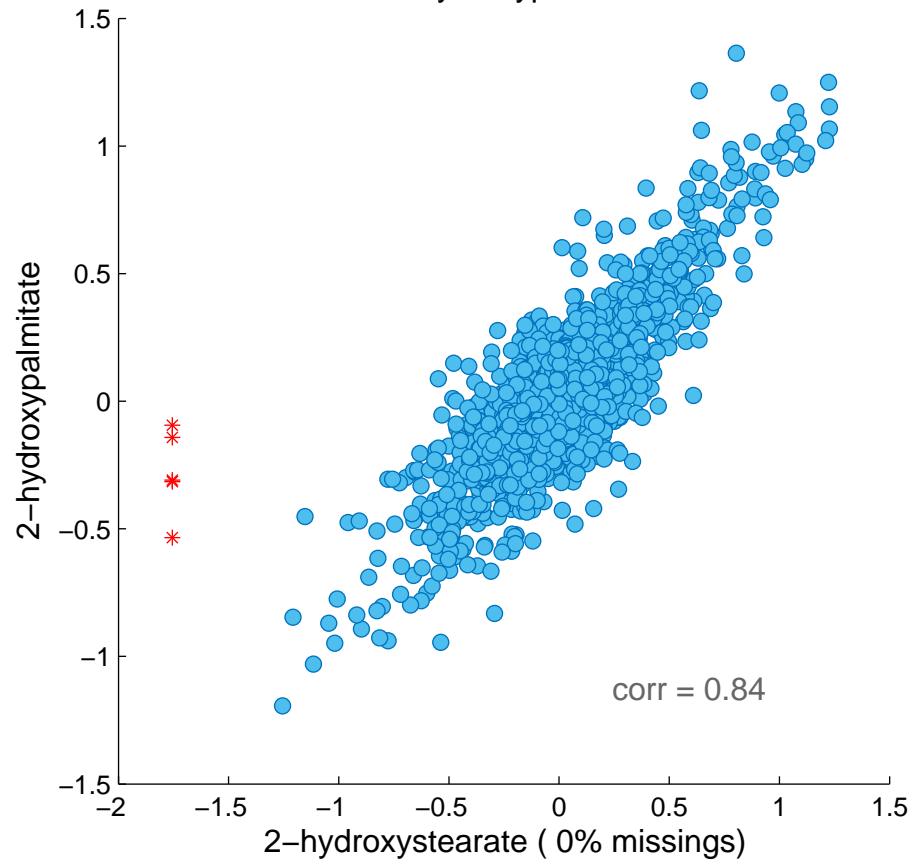

Concentrations of 2-hydroxypalmitate in  
missing and observed 2-hydroxystearate

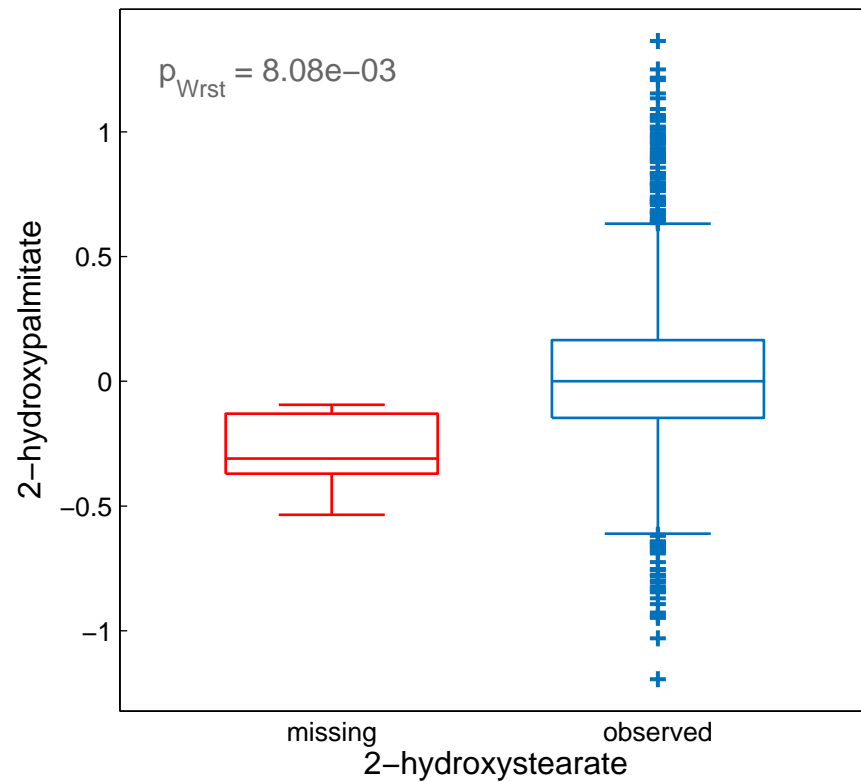

Missing values of X-11843  
in X-11850

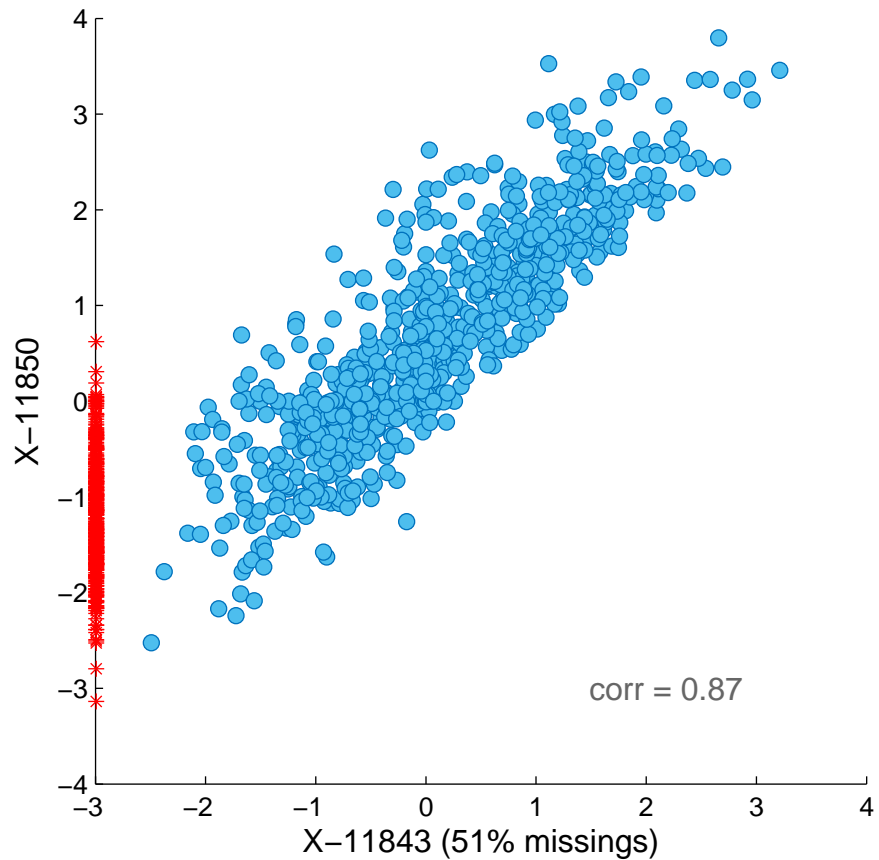

Concentrations of X-11850 in  
missing and observed X-11843

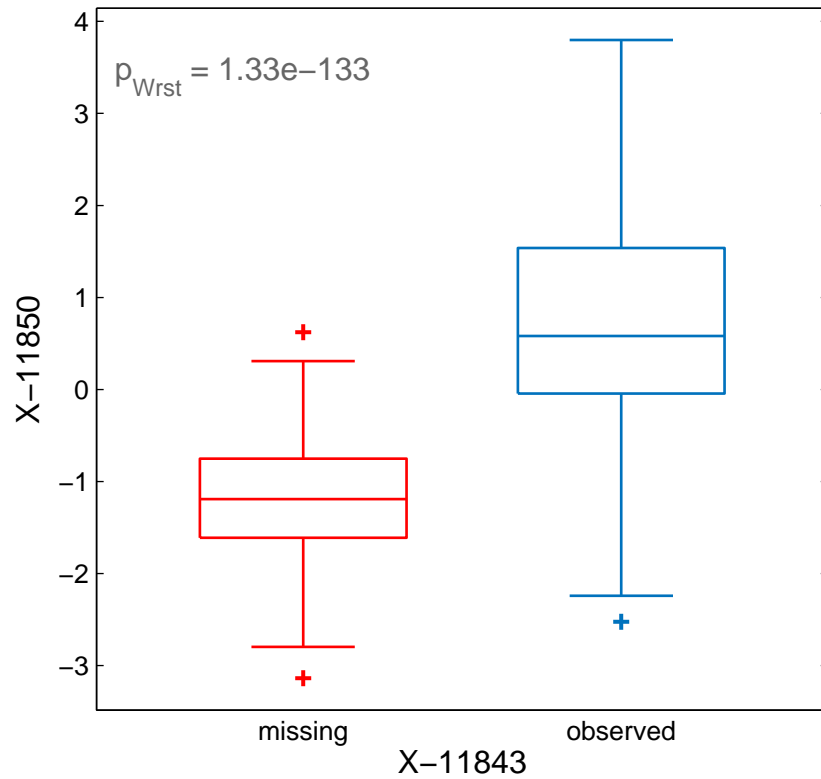

Missing values of X-11845  
in X-11849

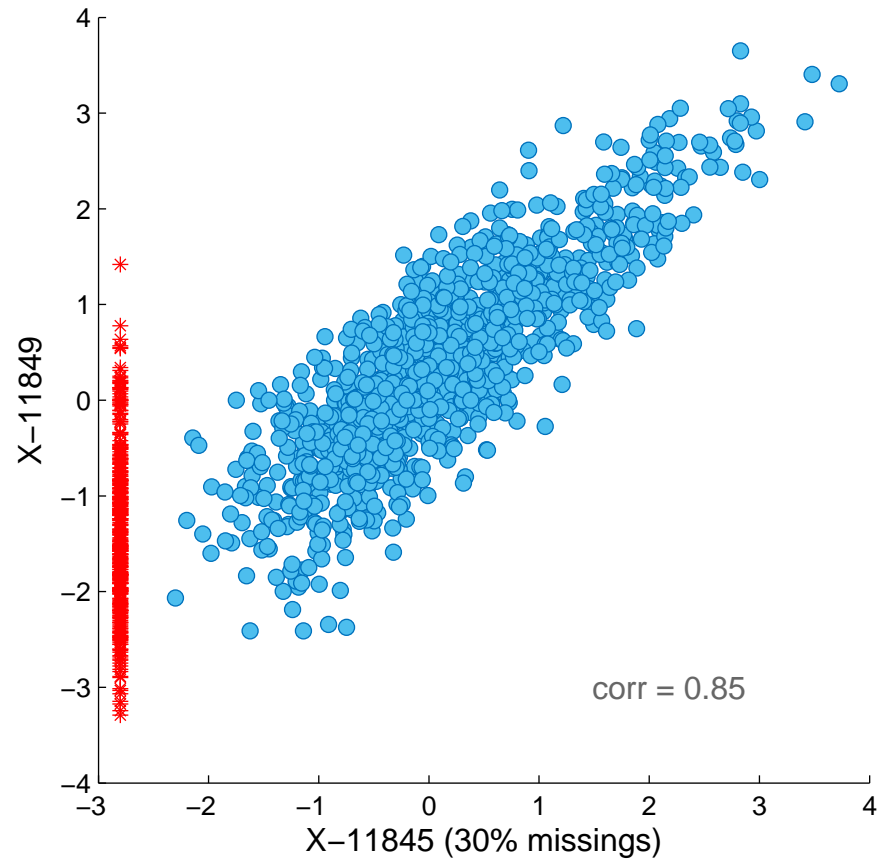

Concentrations of X-11849 in  
missing and observed X-11845

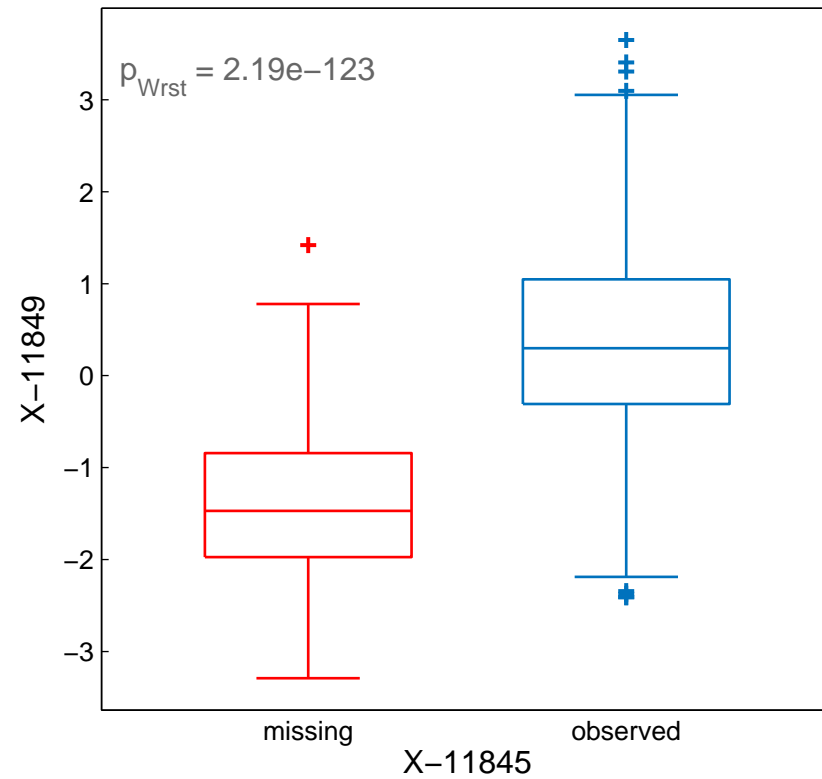

Missing values of X-11847  
in X-11849

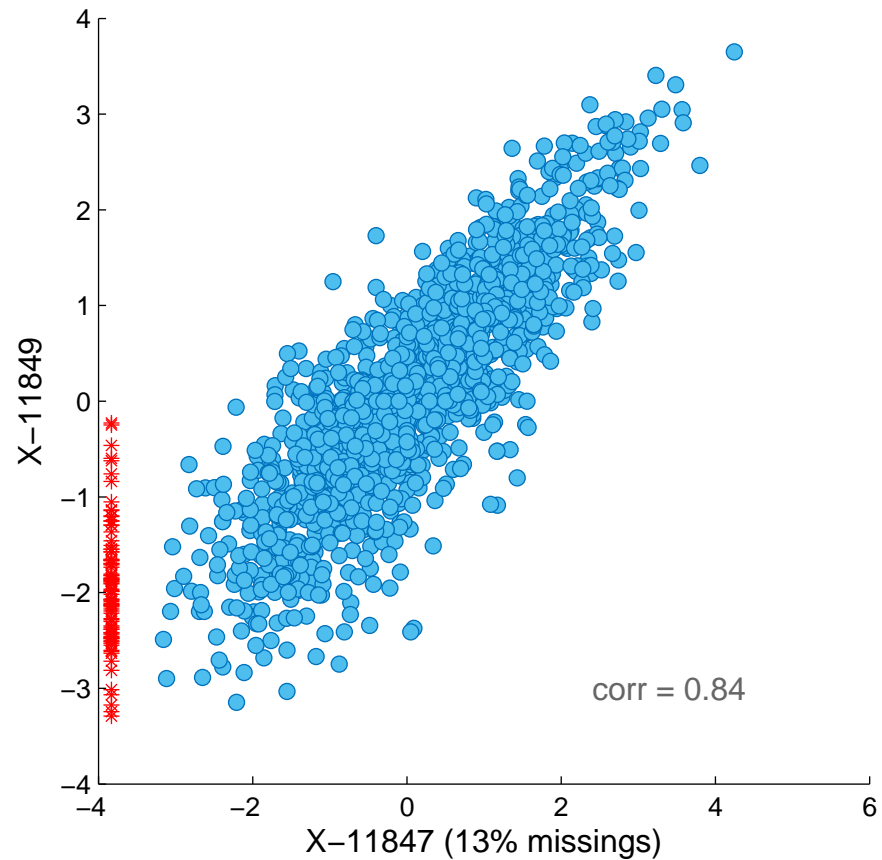

Concentrations of X-11849 in  
missing and observed X-11847

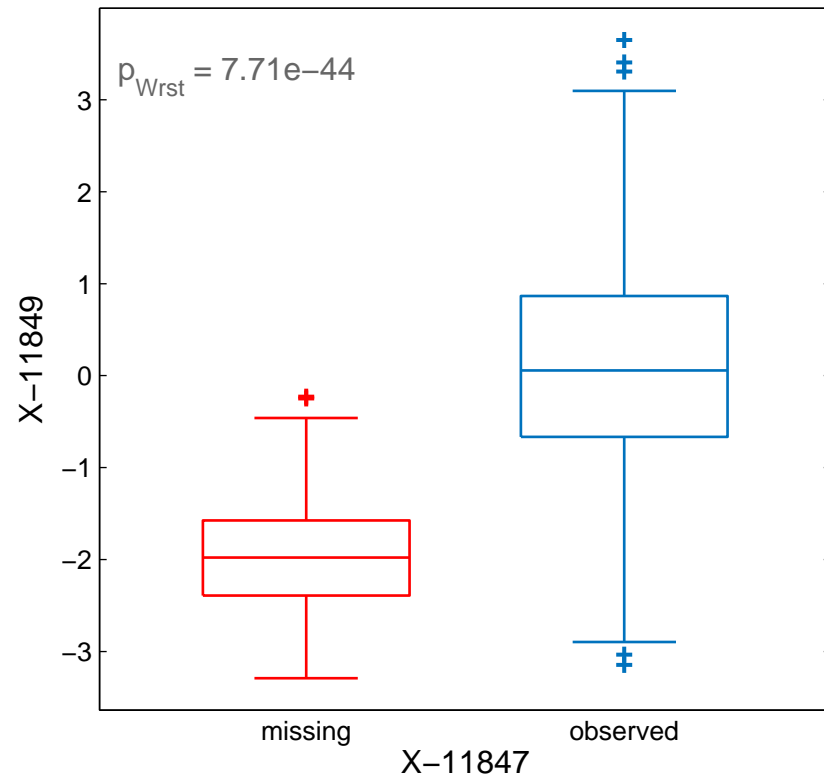

Missing values of X-11850  
in X-11843

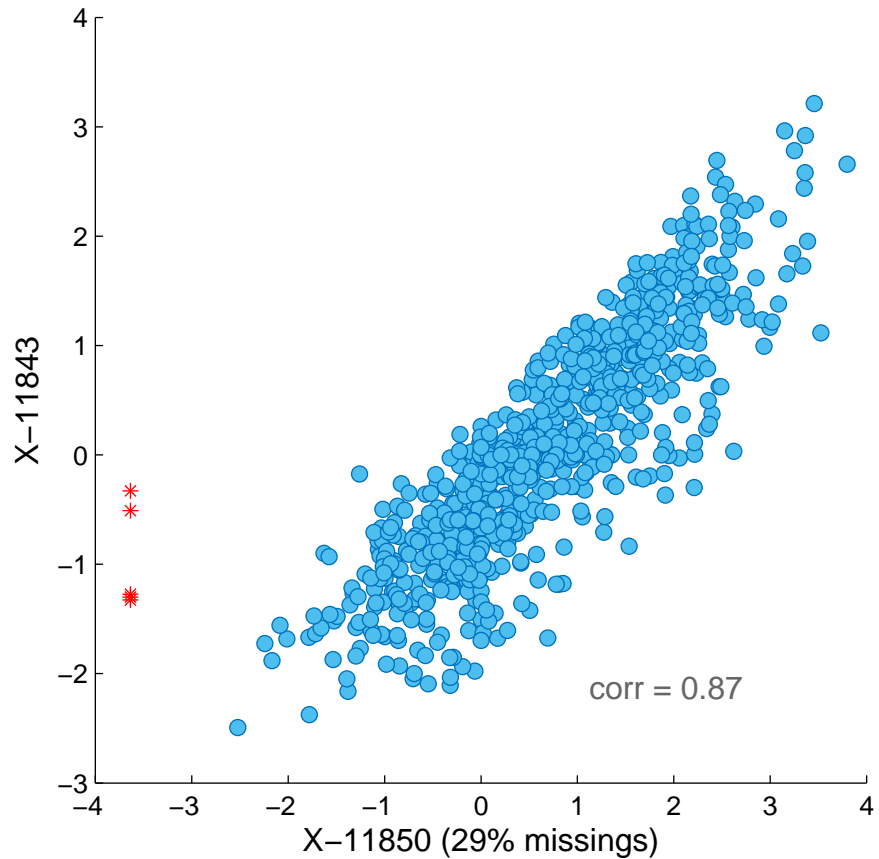

Concentrations of X-11843 in  
missing and observed X-11850

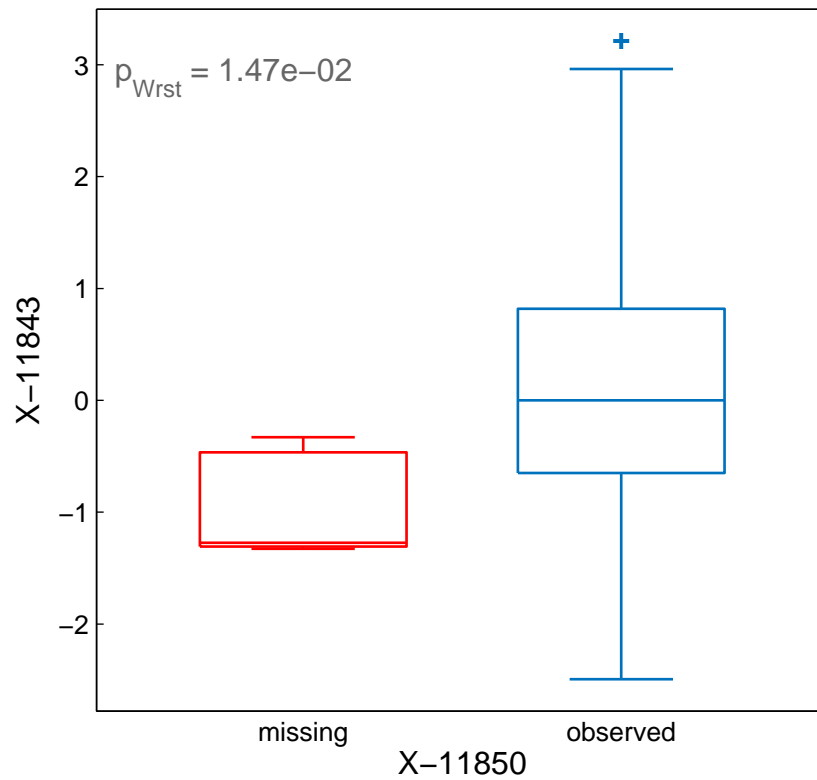

Missing values of X-11858  
in X-11847

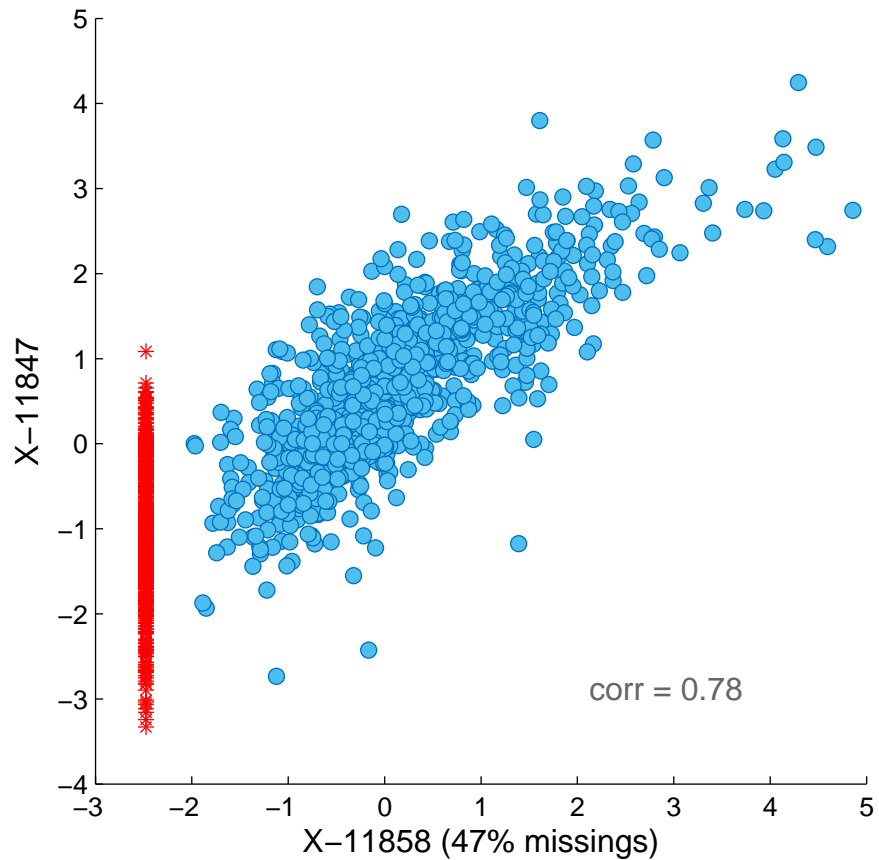

Concentrations of X-11847 in  
missing and observed X-11858

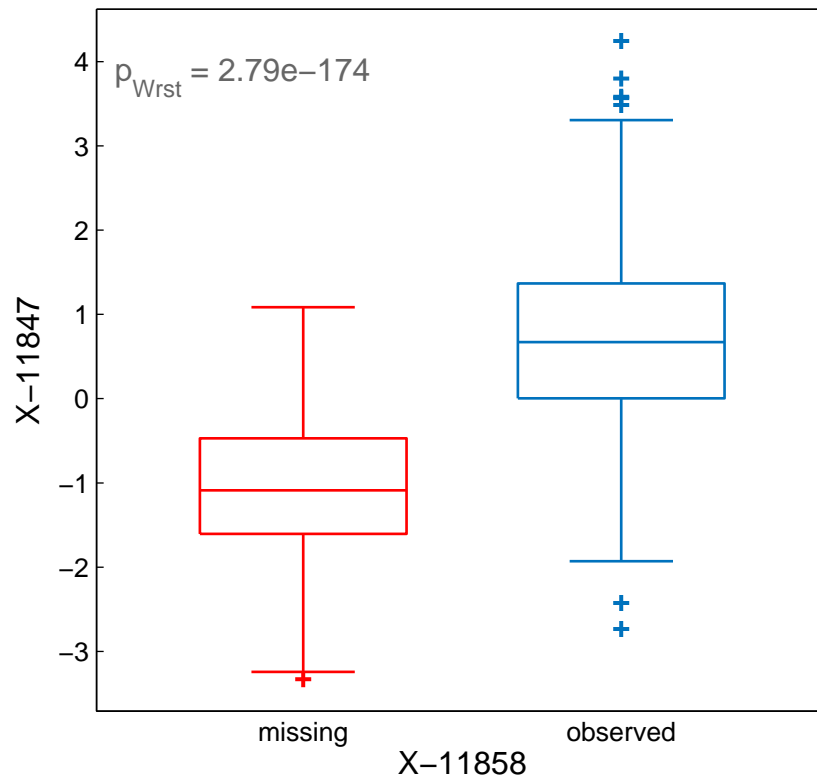

Missing values of X-11859  
in pelargonate (9:0)

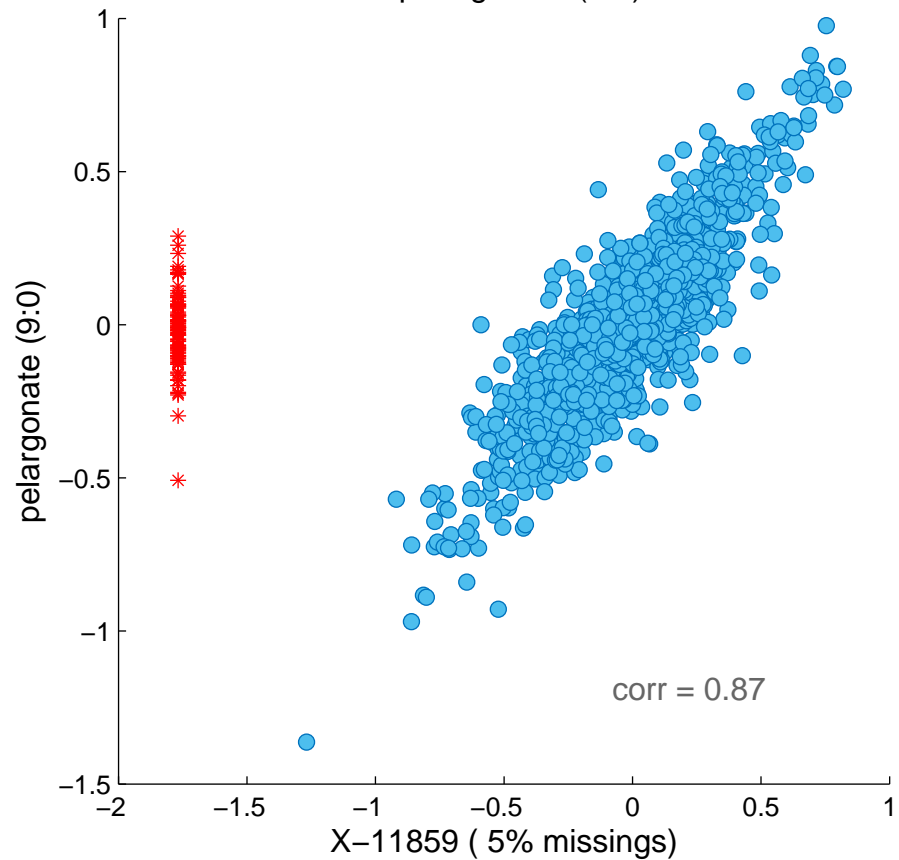

Concentrations of pelargonate (9:0) in  
missing and observed X-11859

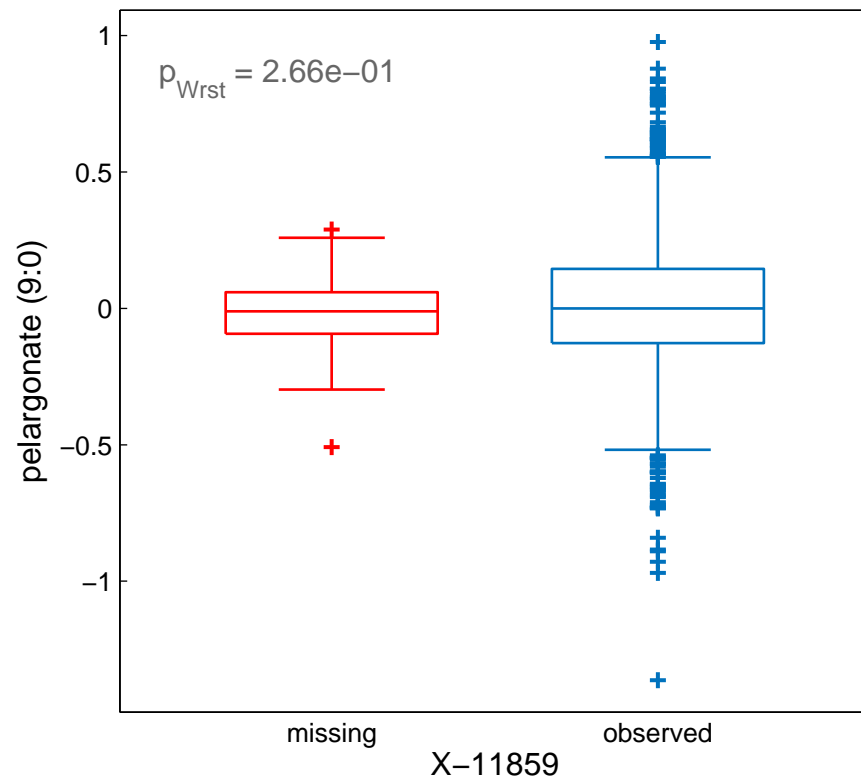



Missing values of X-11876  
in alpha-tocopherol

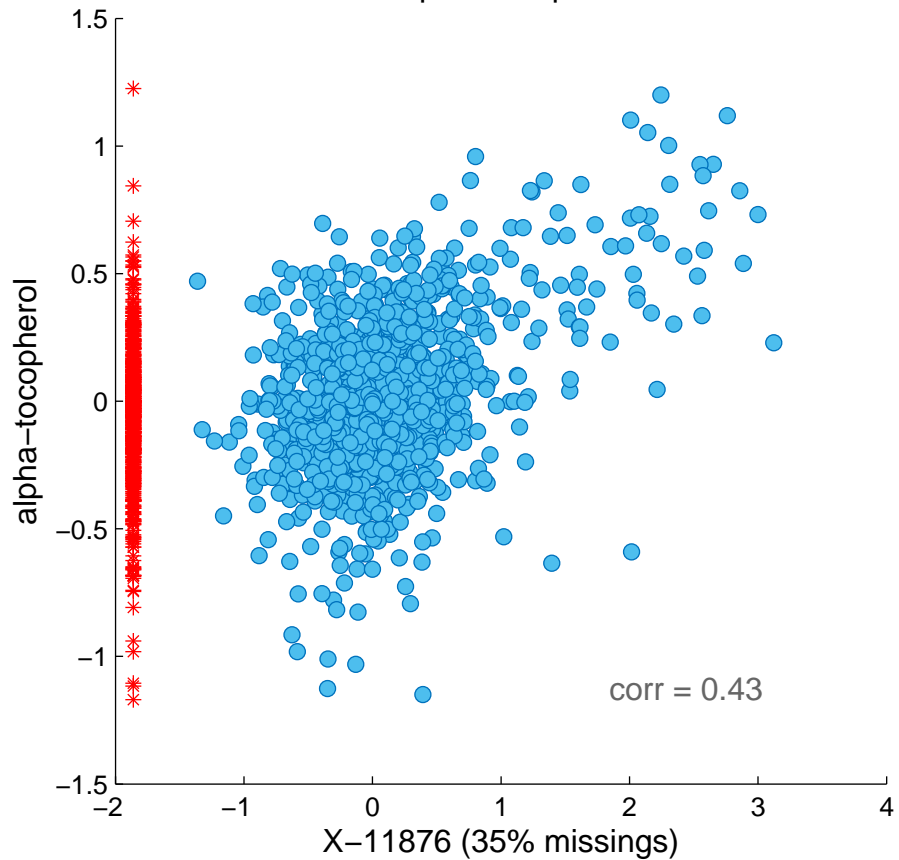

Concentrations of alpha-tocopherol in  
missing and observed X-11876

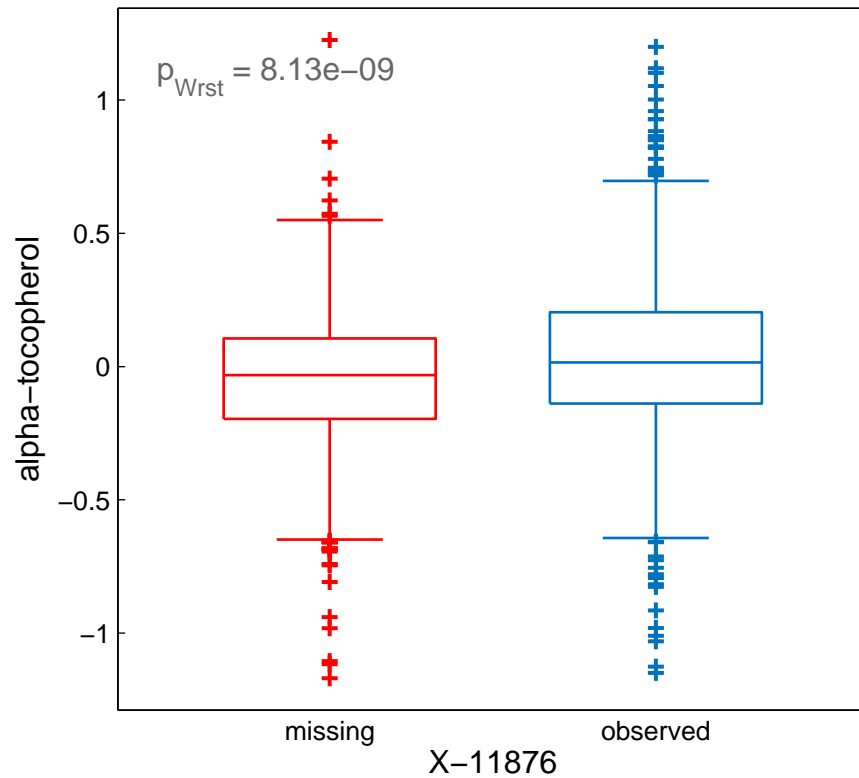

Missing values of 2-linoleoylglycerophosphocholine  
in 1-linoleoylglycerophosphocholine

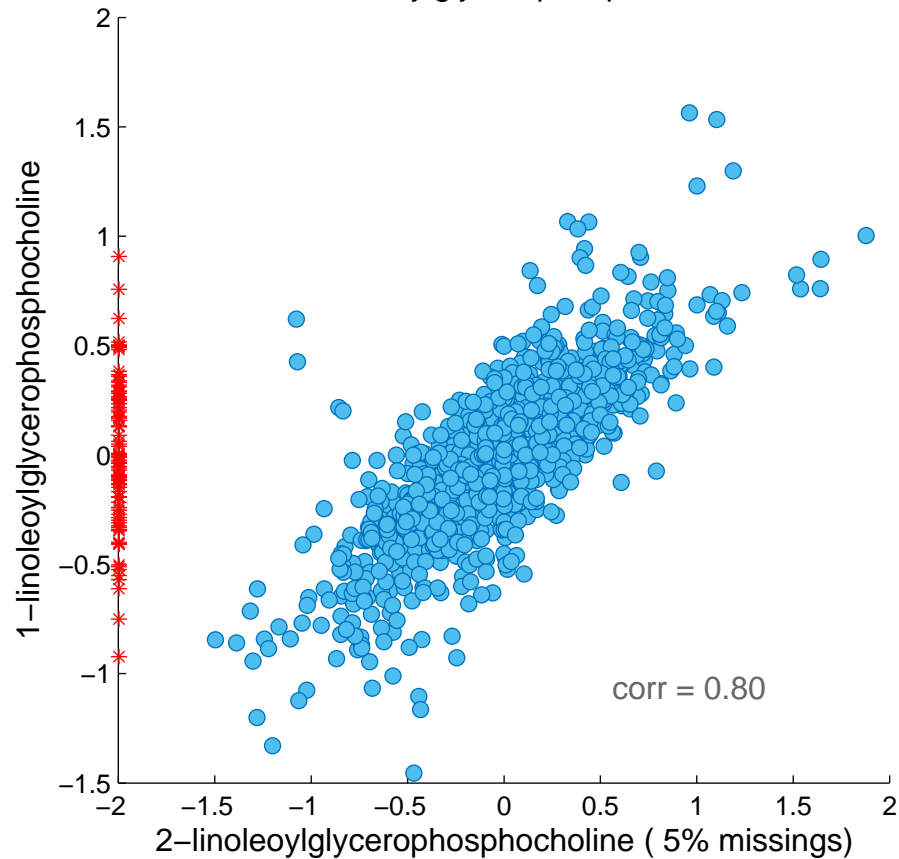

Concentrations of 1-linoleoylglycerophosphocholine in  
missing and observed 2-linoleoylglycerophosphocholine

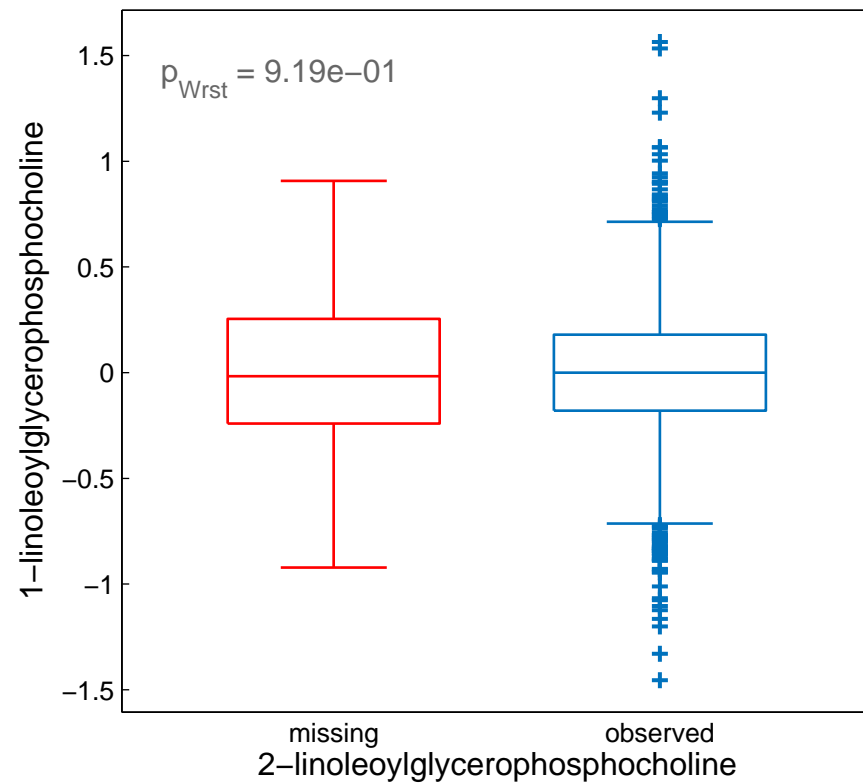

Missing values of X-12007  
in X-12728

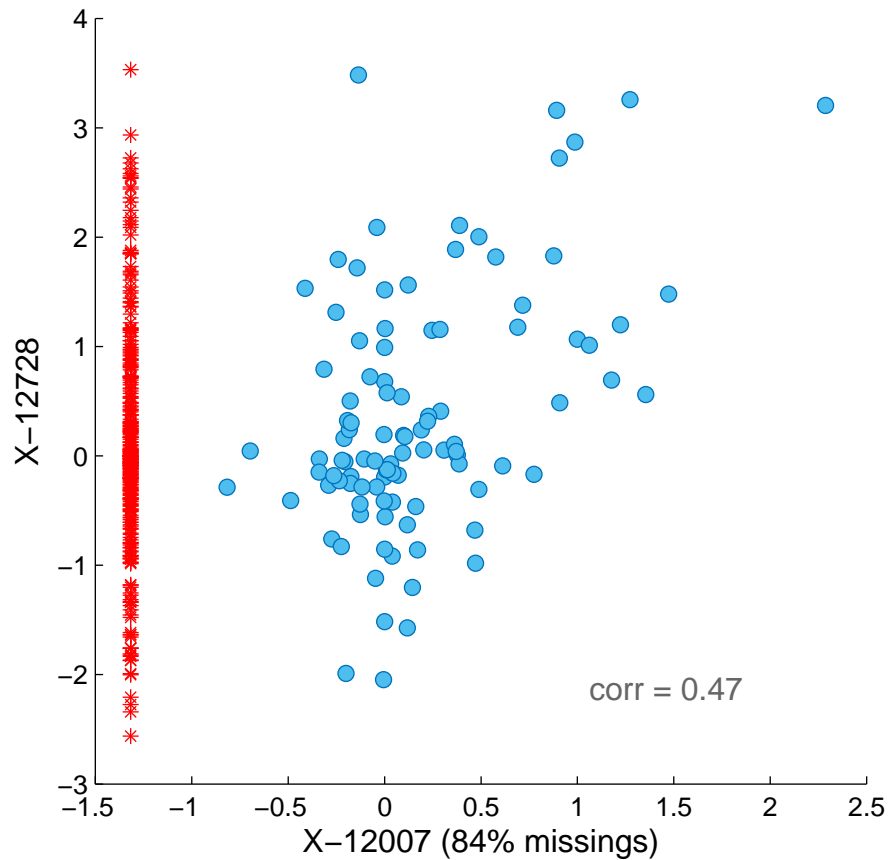

Concentrations of X-12728 in  
missing and observed X-12007

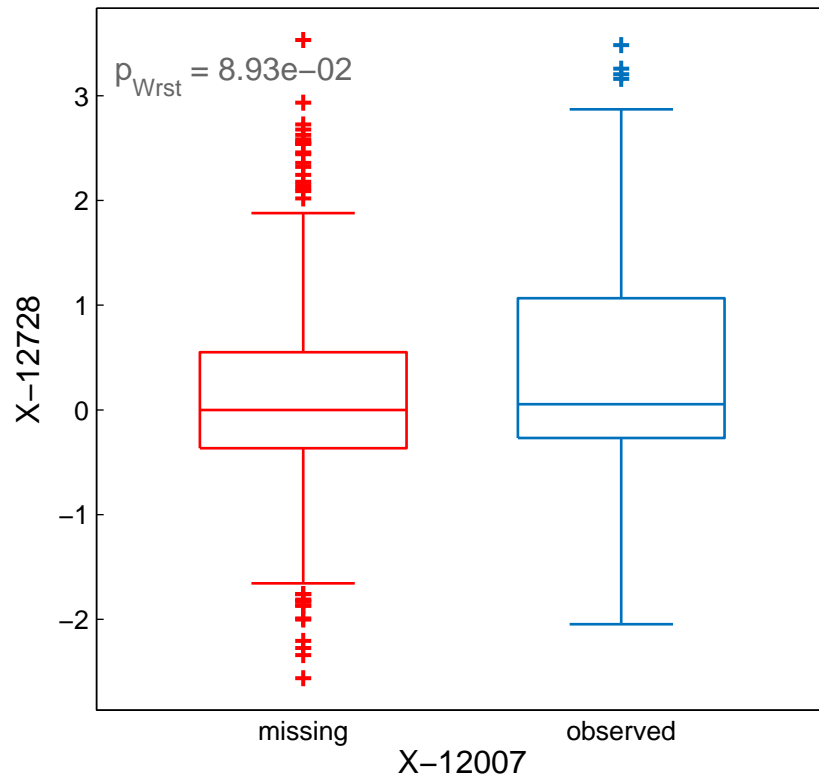

Missing values of X-12013  
in X-11843

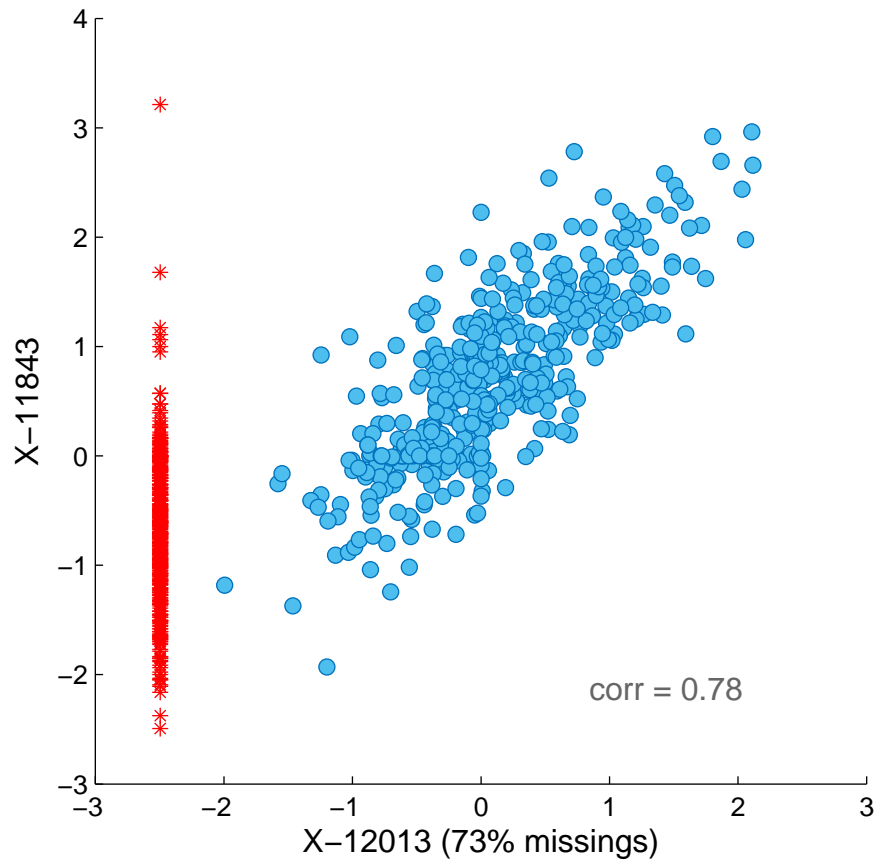

Concentrations of X-11843 in  
missing and observed X-12013

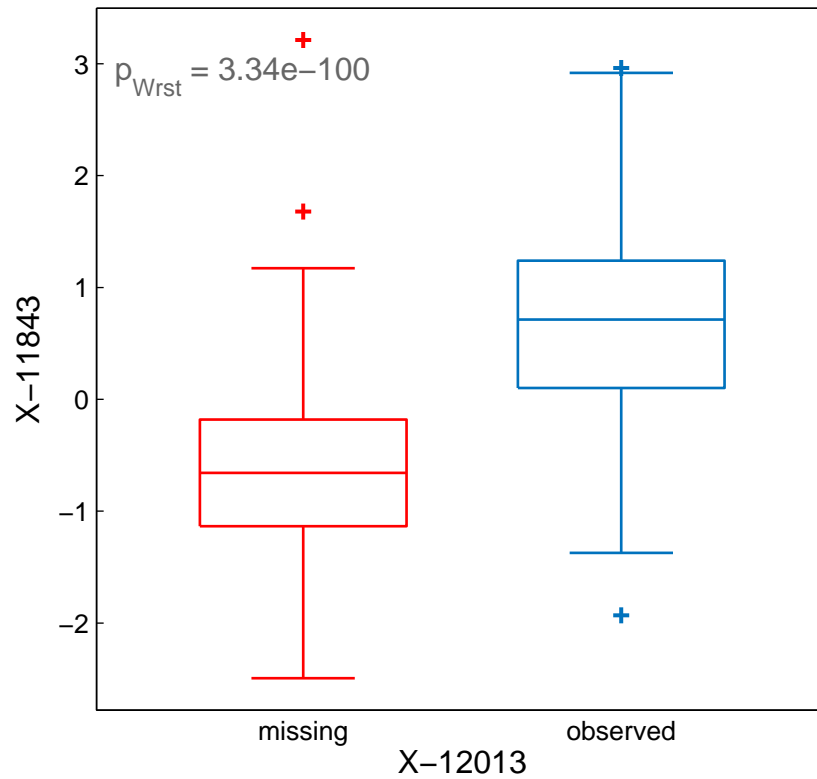

Missing values of X-12029  
in X-14588

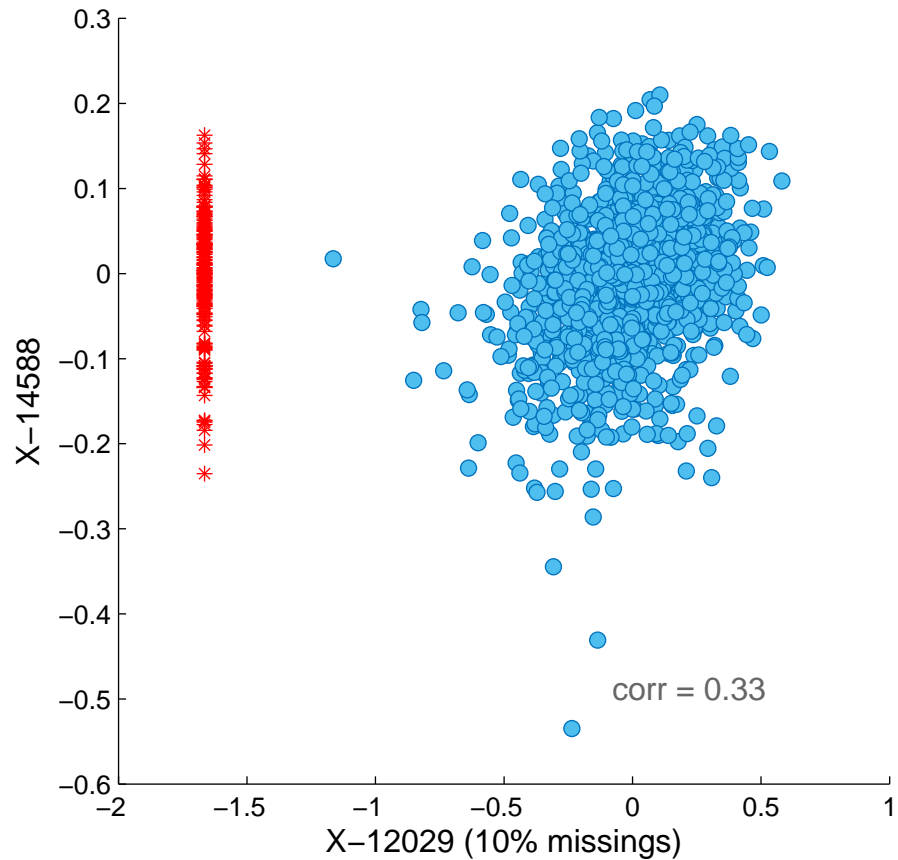

Concentrations of X-14588 in  
missing and observed X-12029

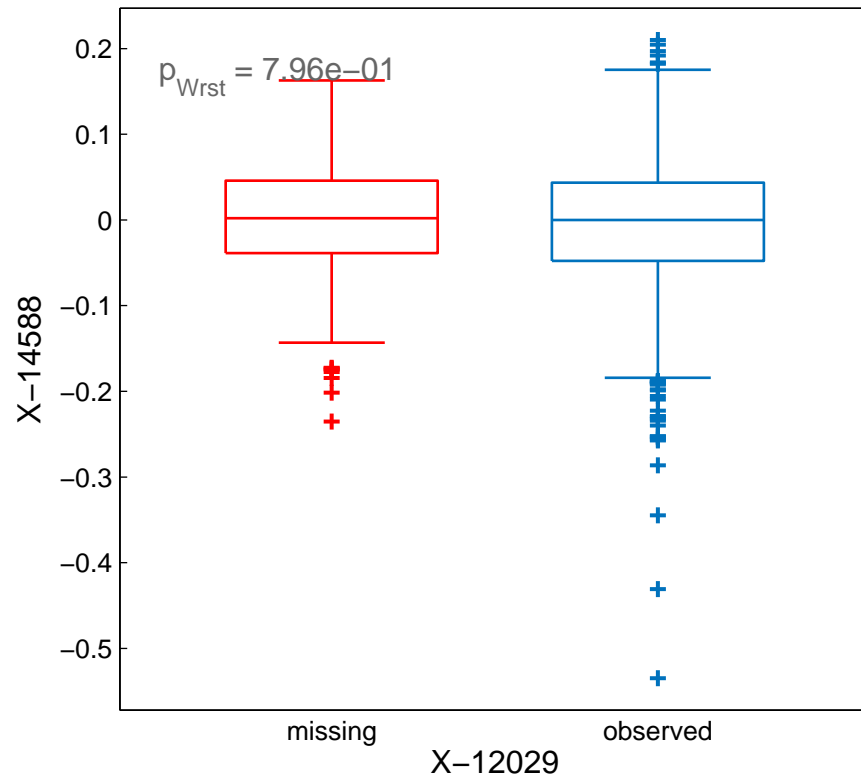

Missing values of X-12038  
in X-11317

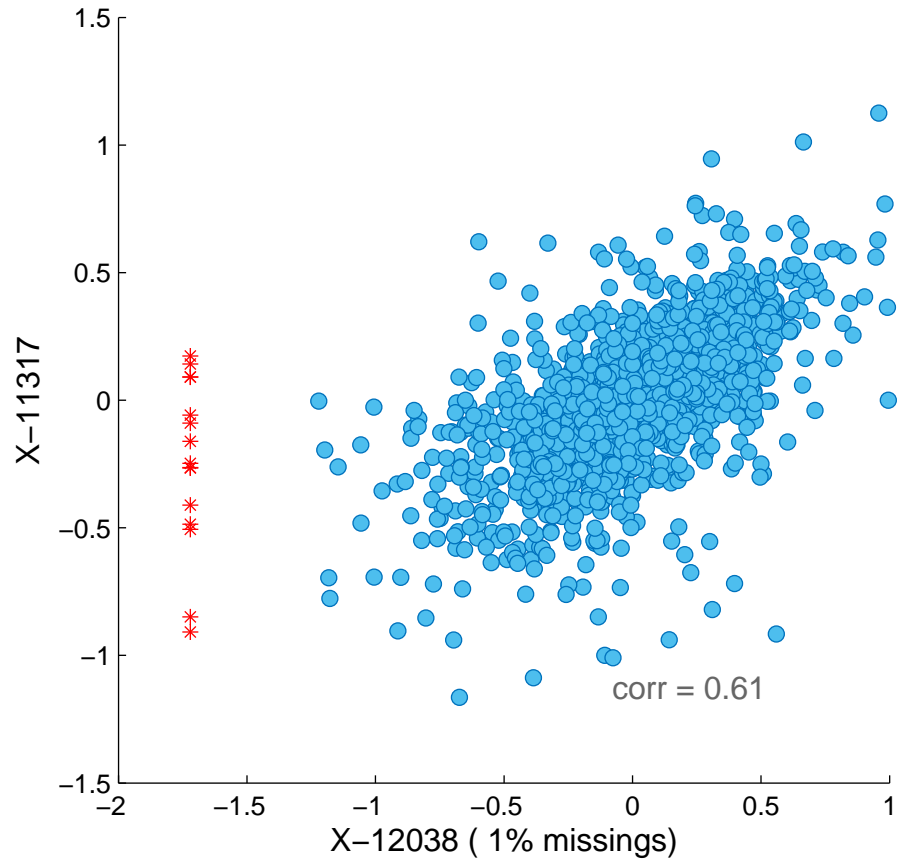

Concentrations of X-11317 in  
missing and observed X-12038

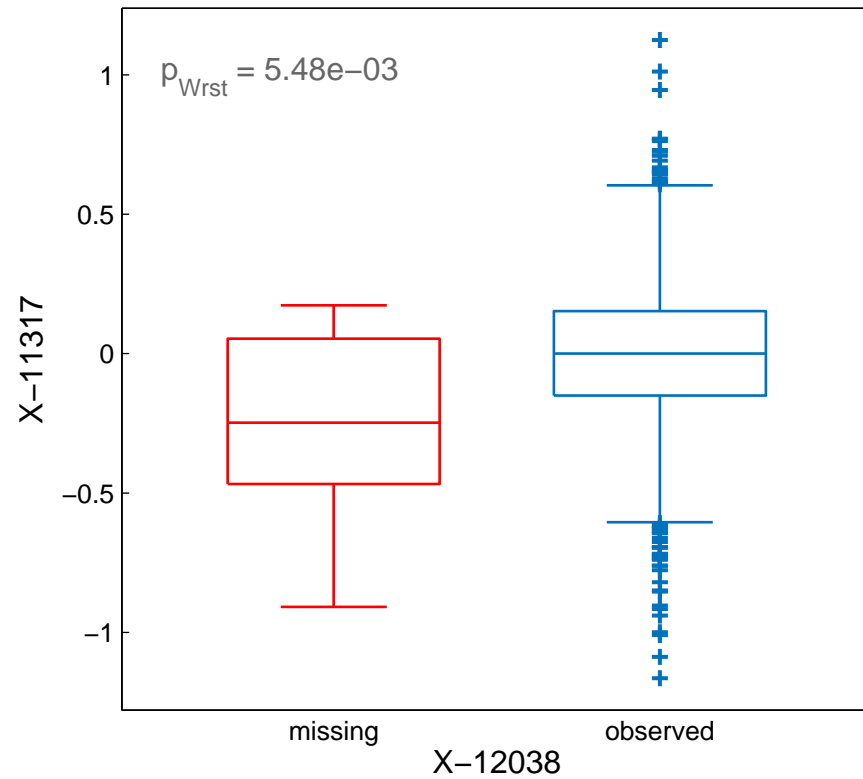

Missing values of X-12039  
in X-12230

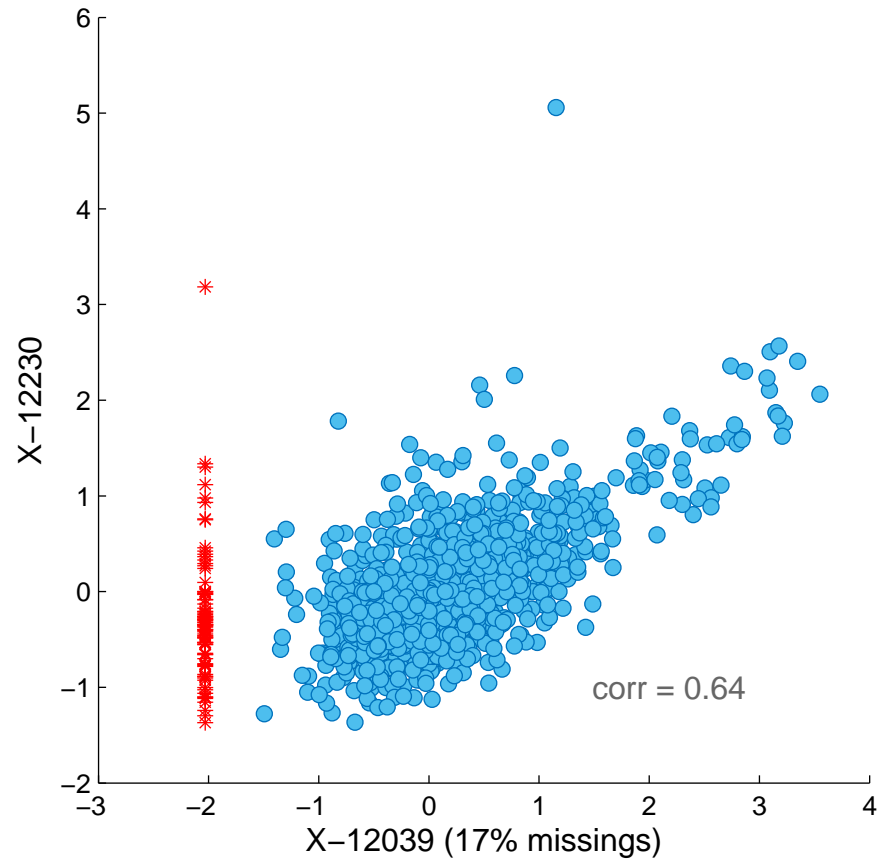

Concentrations of X-12230 in  
missing and observed X-12039

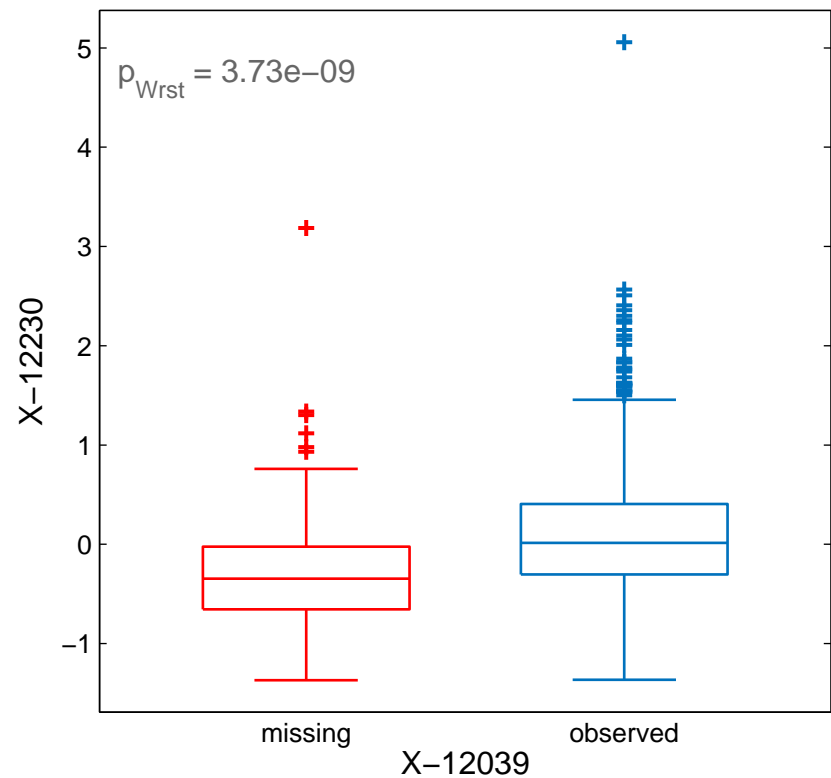

Missing values of X-12063  
in X-12456

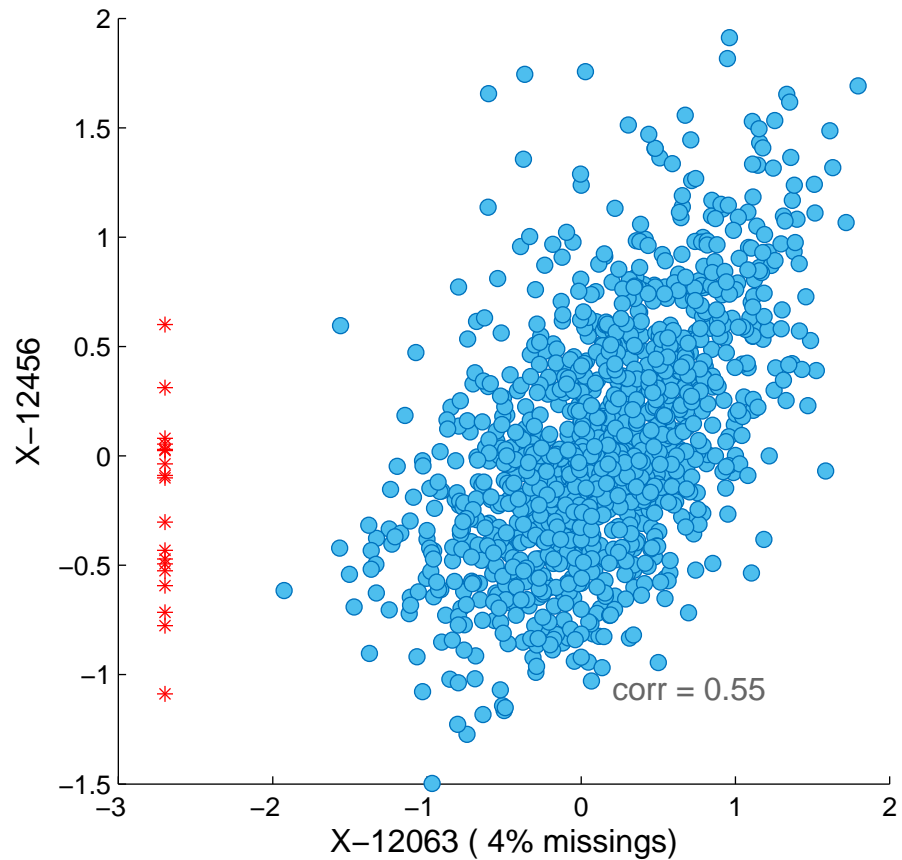

Concentrations of X-12456 in  
missing and observed X-12063

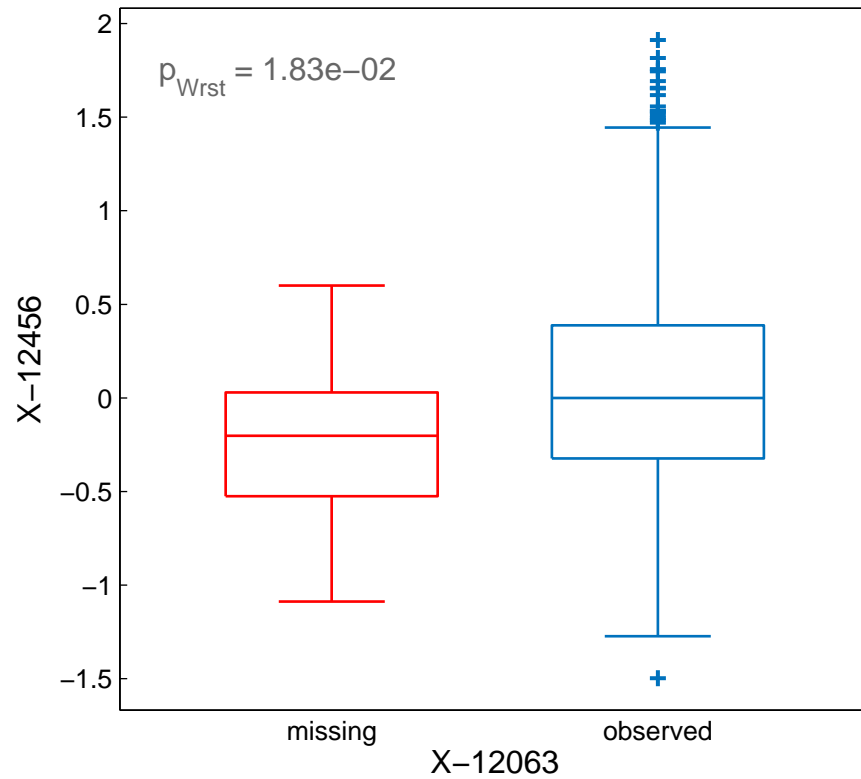



Missing values of X-12092  
in C-glycosyltryptophan

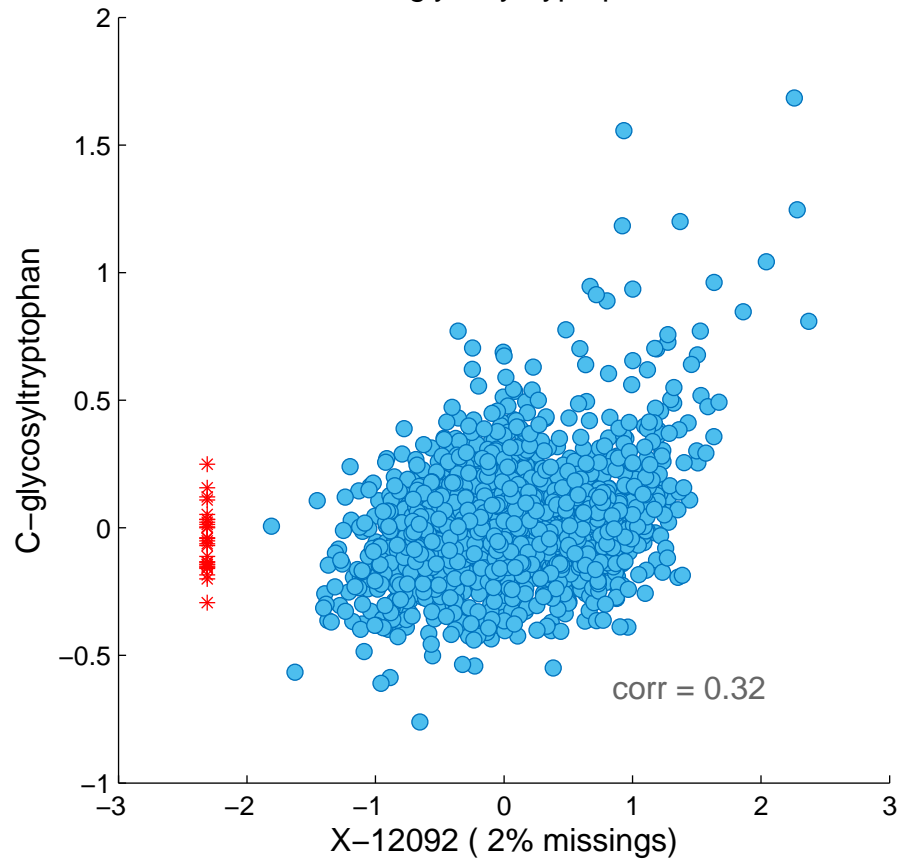

Concentrations of C-glycosyltryptophan in  
missing and observed X-12092

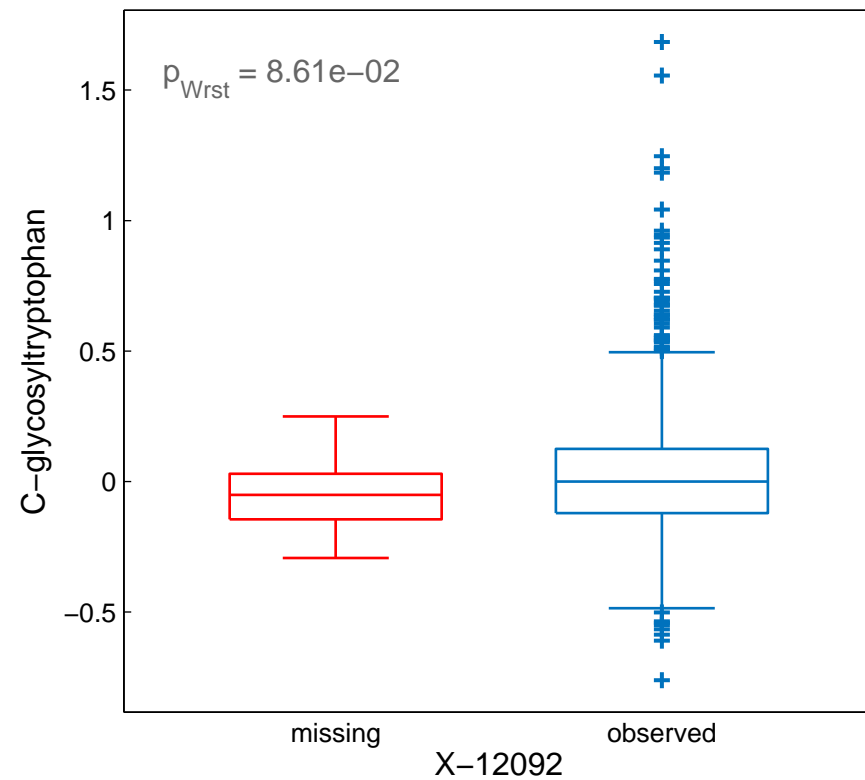

Missing values of X-12093  
in X-12092

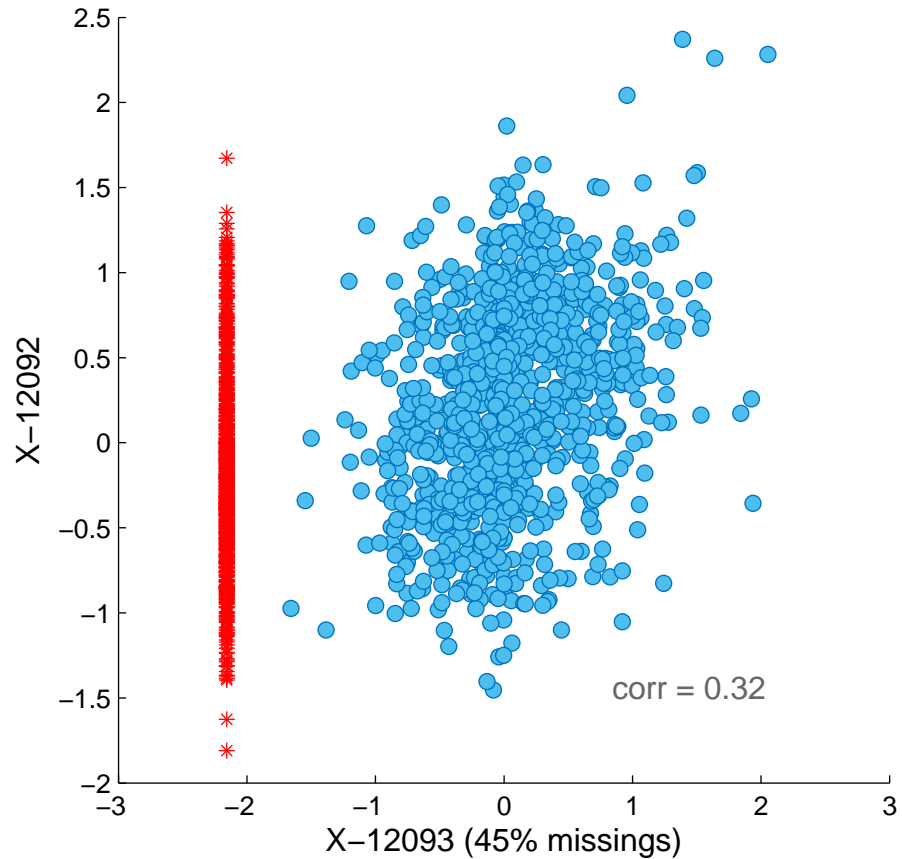

Concentrations of X-12092 in  
missing and observed X-12093

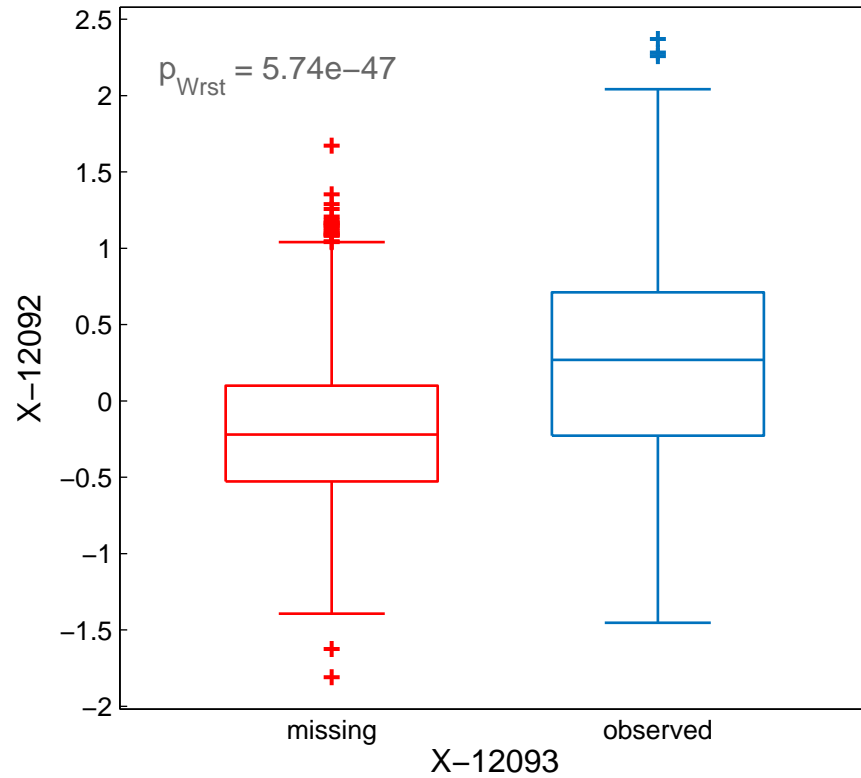

Missing values of X-12094  
in X-12095

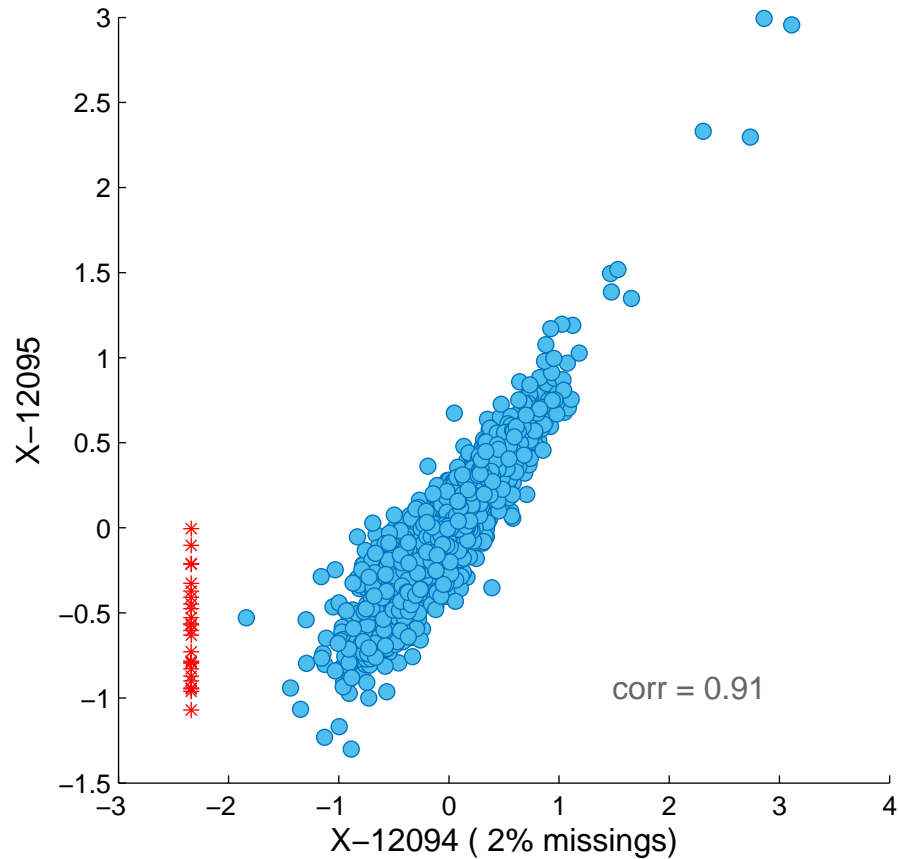

Concentrations of X-12095 in  
missing and observed X-12094

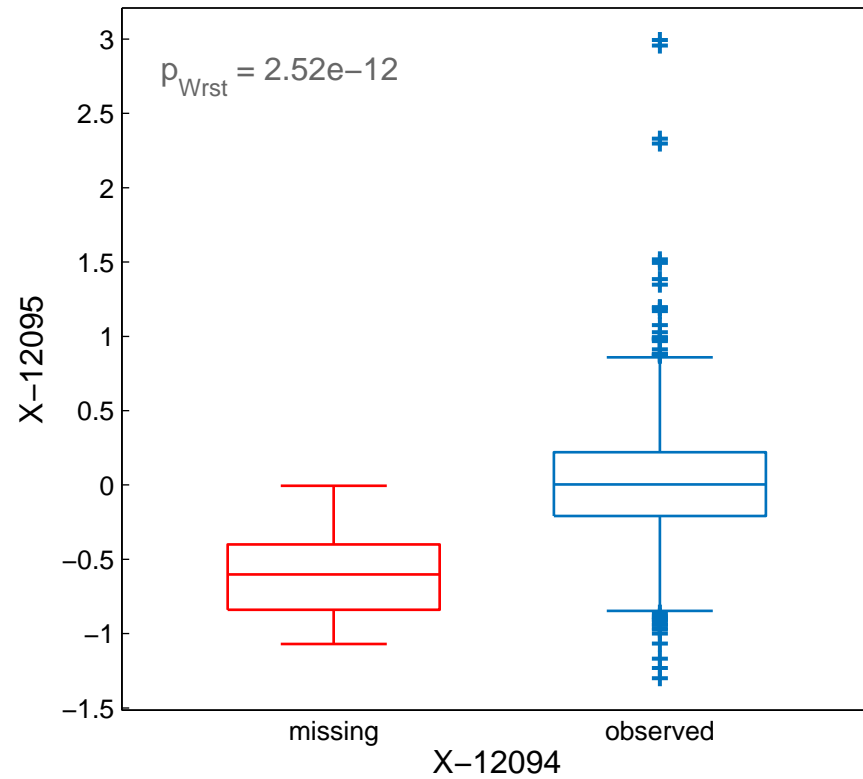

Missing values of 2-linoleoylglycerophosphoethanolamine in 1-linoleoylglycerophosphoethanolamine

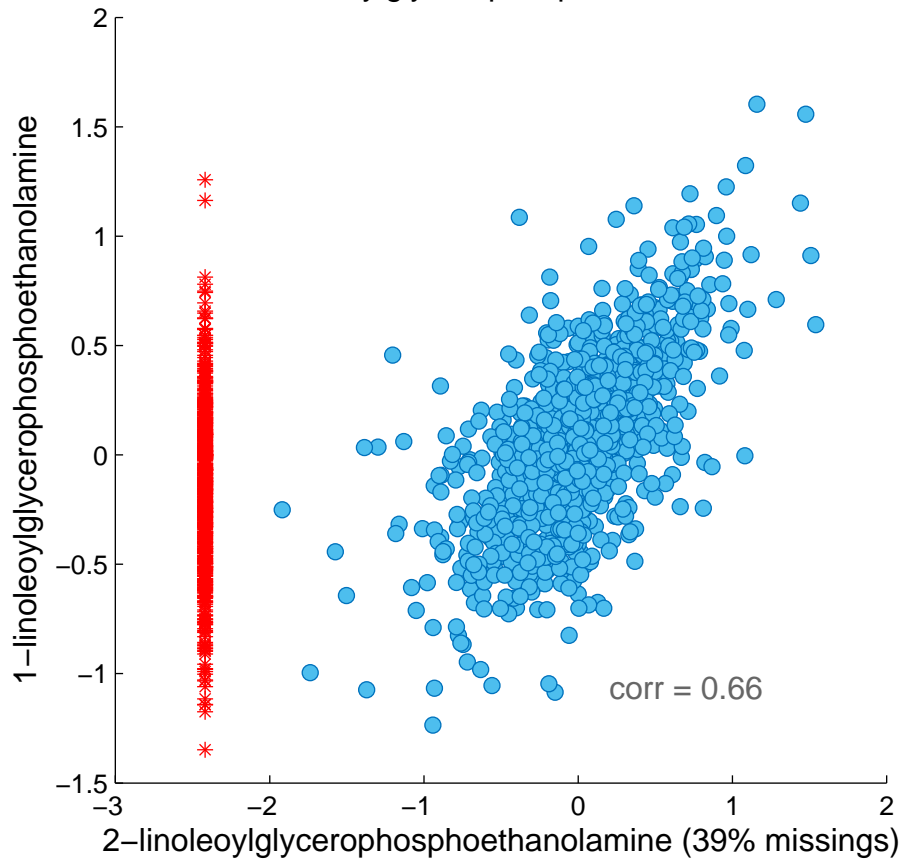

Concentrations of 1-linoleoylglycerophosphoethanolamine in missing and observed 2-linoleoylglycerophosphoethanolamine

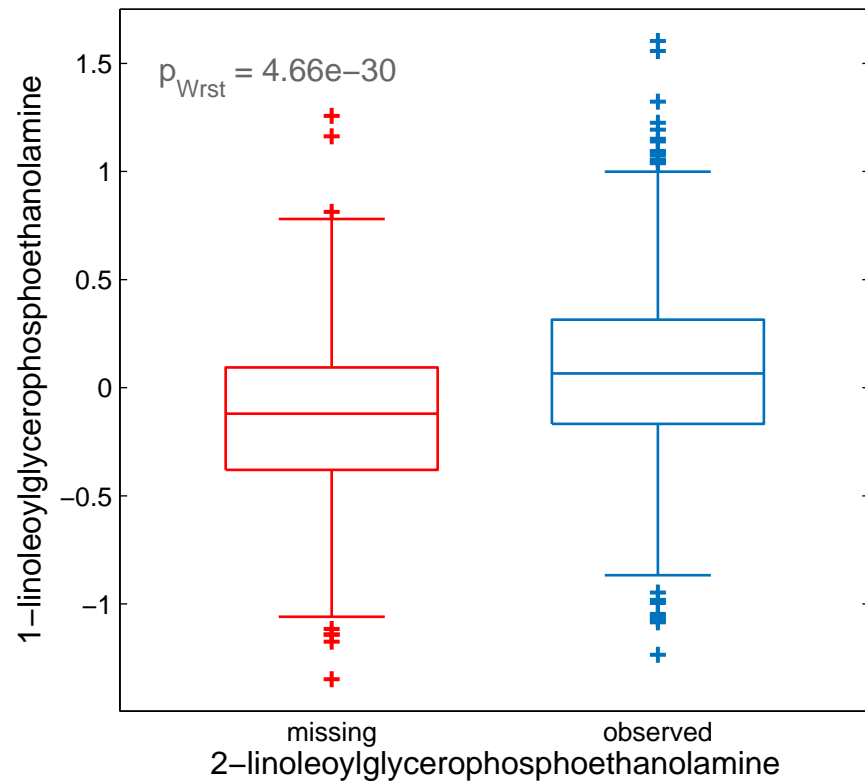

Missing values of X-12095  
in X-12094

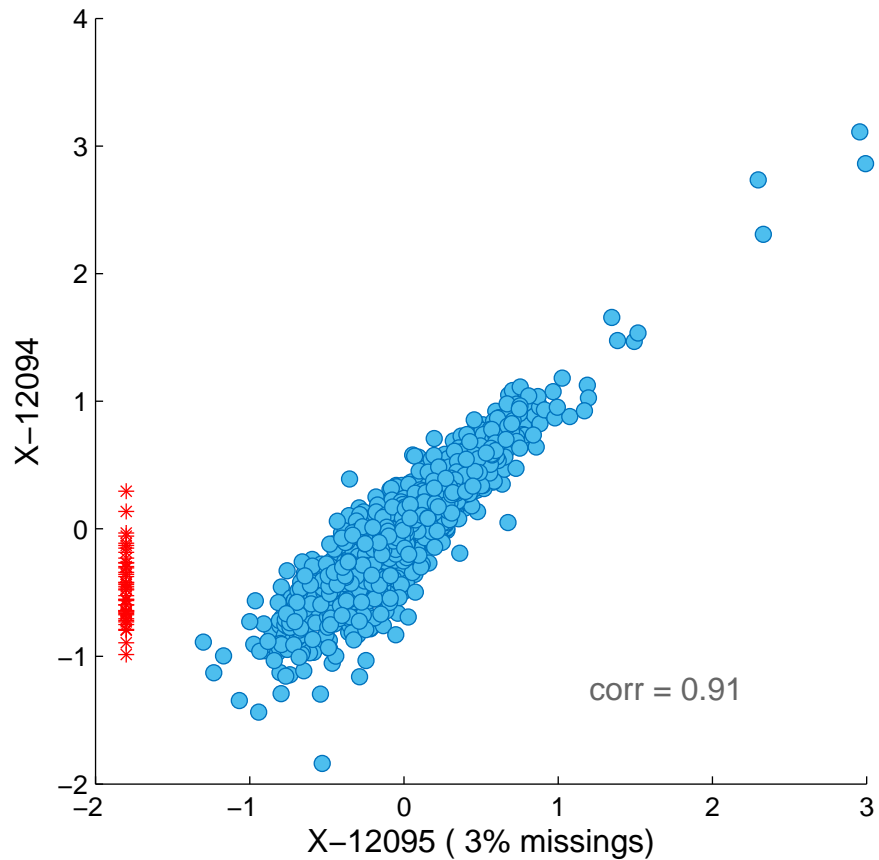

Concentrations of X-12094 in  
missing and observed X-12095

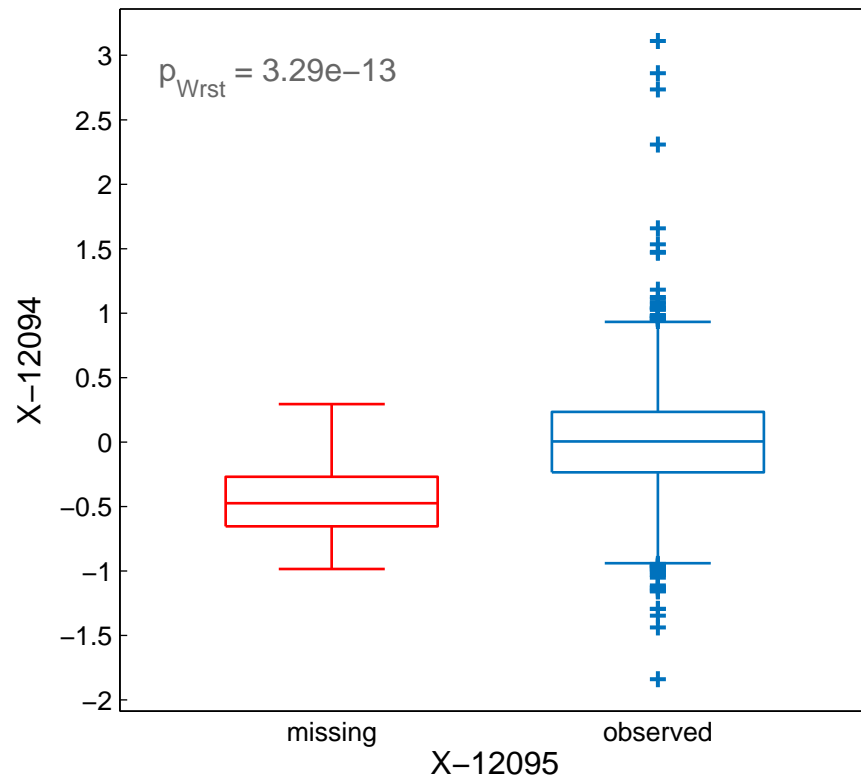

Missing values of X-12100  
in kynurenine

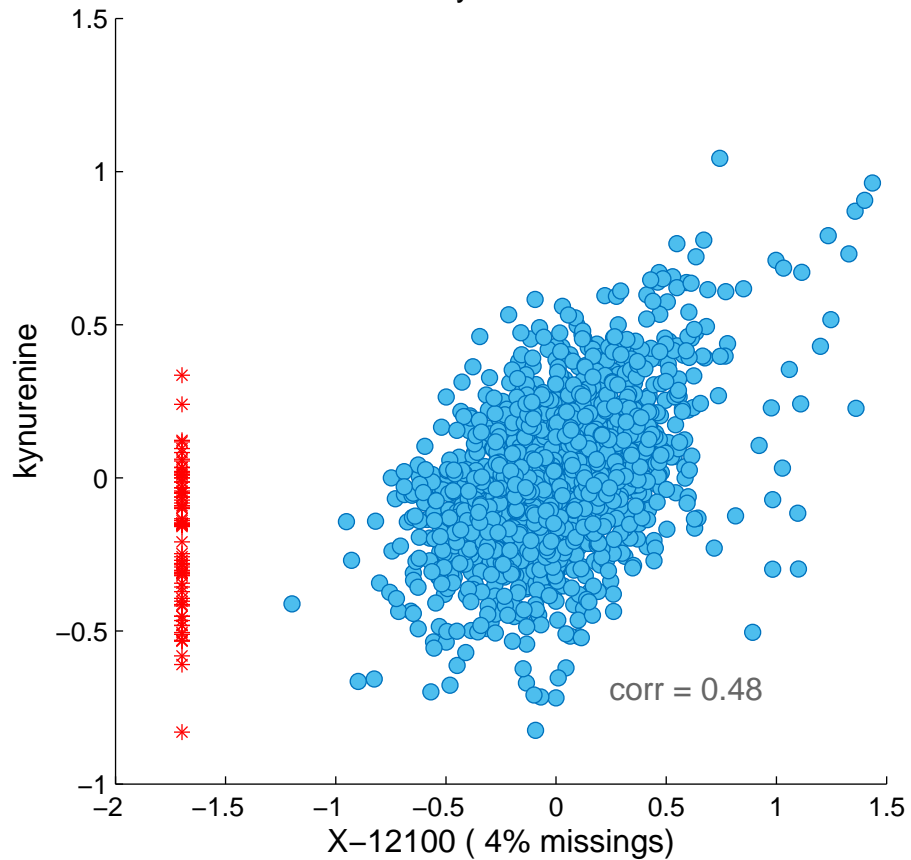

Concentrations of kynurenine in  
missing and observed X-12100

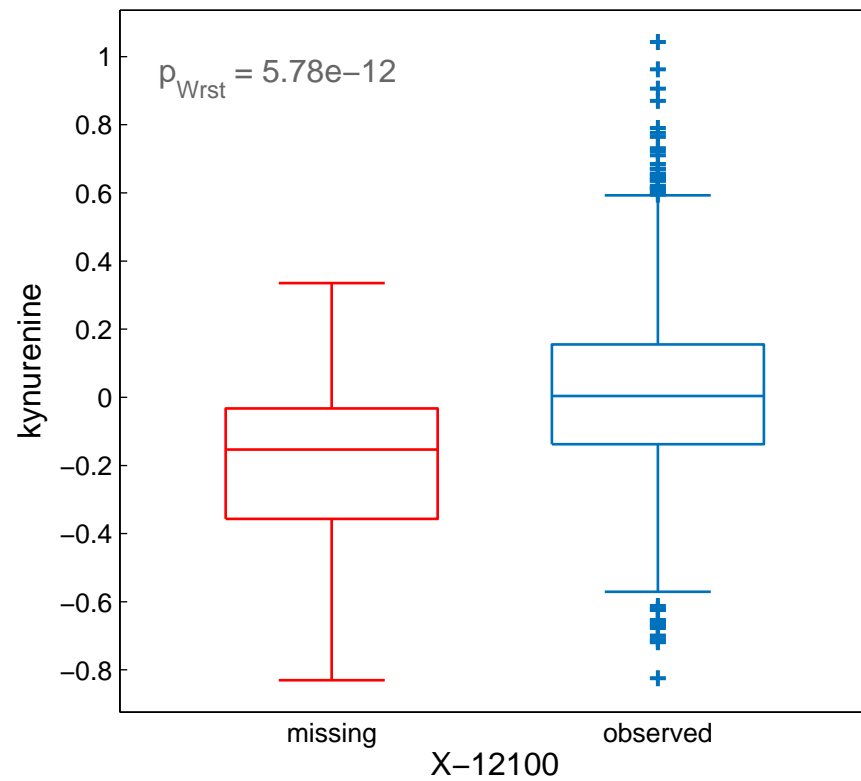

Missing values of X-12116  
in pseudouridine

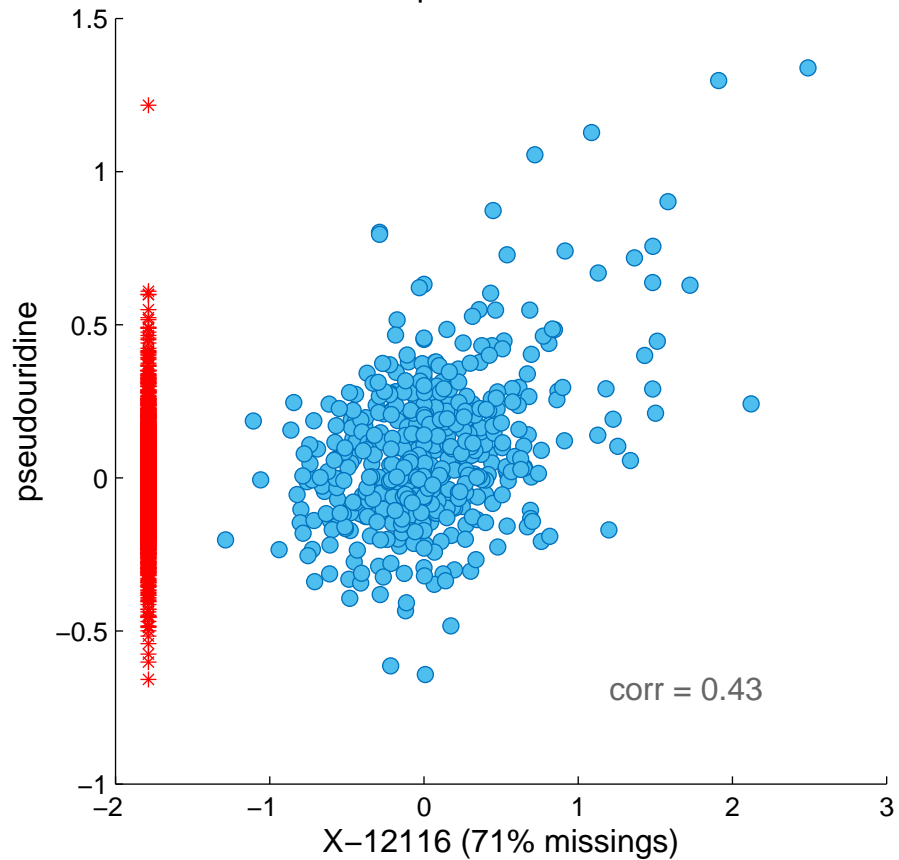

Concentrations of pseudouridine in  
missing and observed X-12116

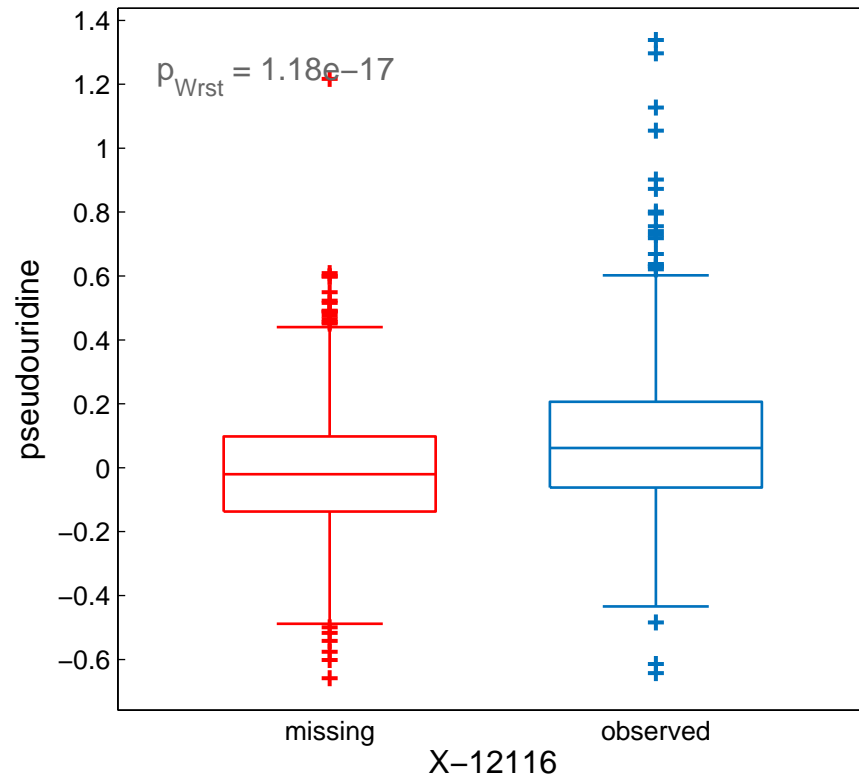

Missing values of X-12188  
in X-11858

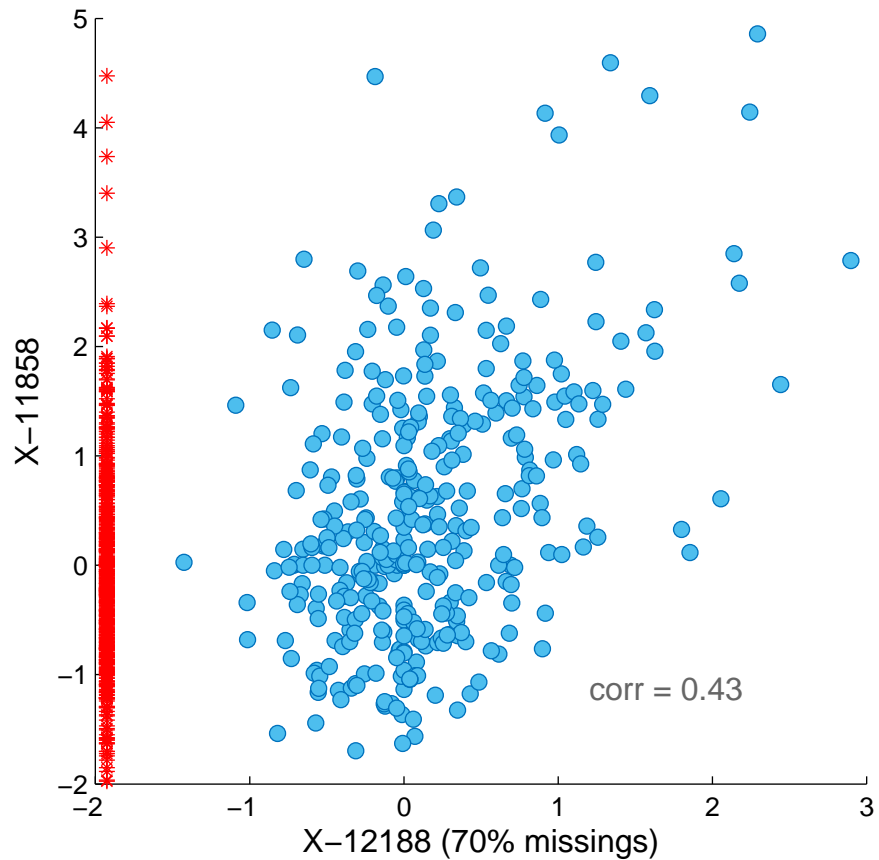

Concentrations of X-11858 in  
missing and observed X-12188

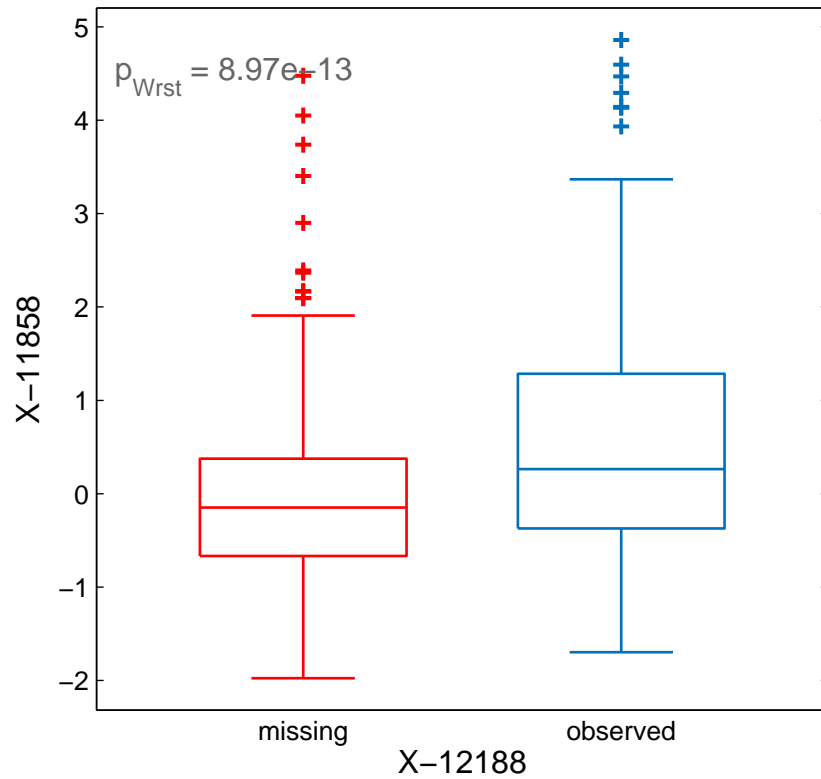



Missing values of X-12206  
in C-glycosyltryptophan

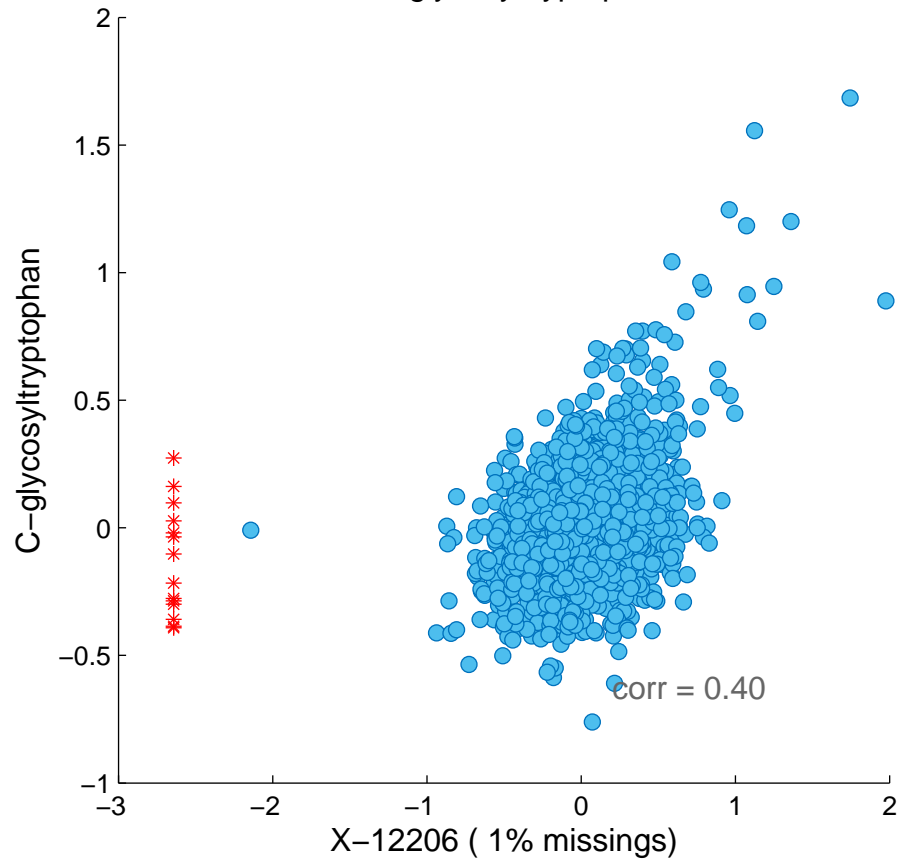

Concentrations of C-glycosyltryptophan in  
missing and observed X-12206

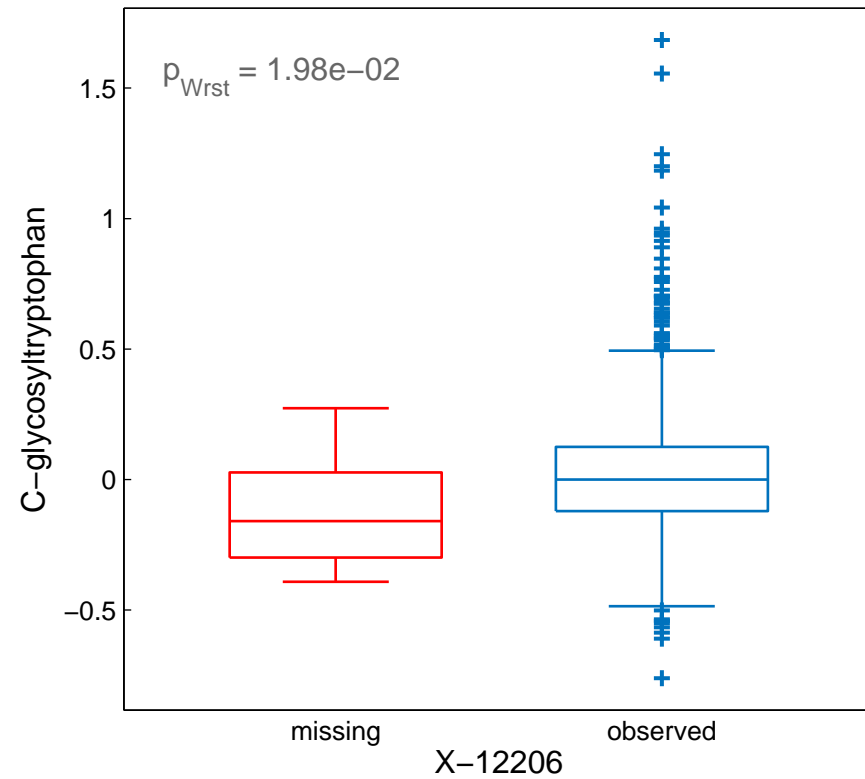

Missing values of X-12216  
in phenylacetylglutamine

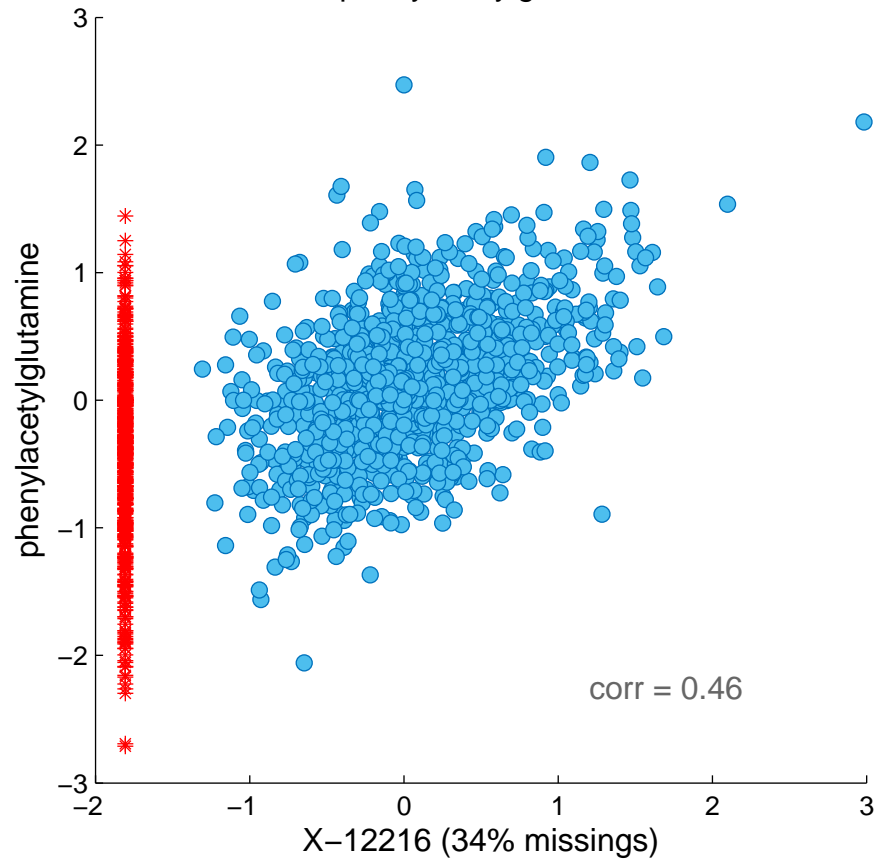

Concentrations of phenylacetylglutamine in  
missing and observed X-12216

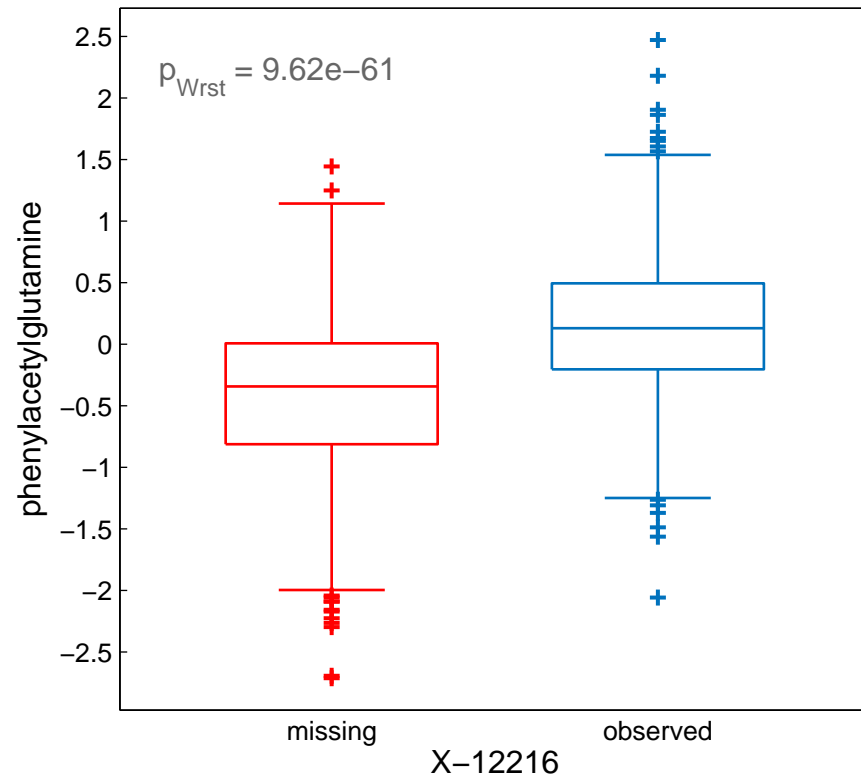

Missing values of X-12217  
in catechol sulfate

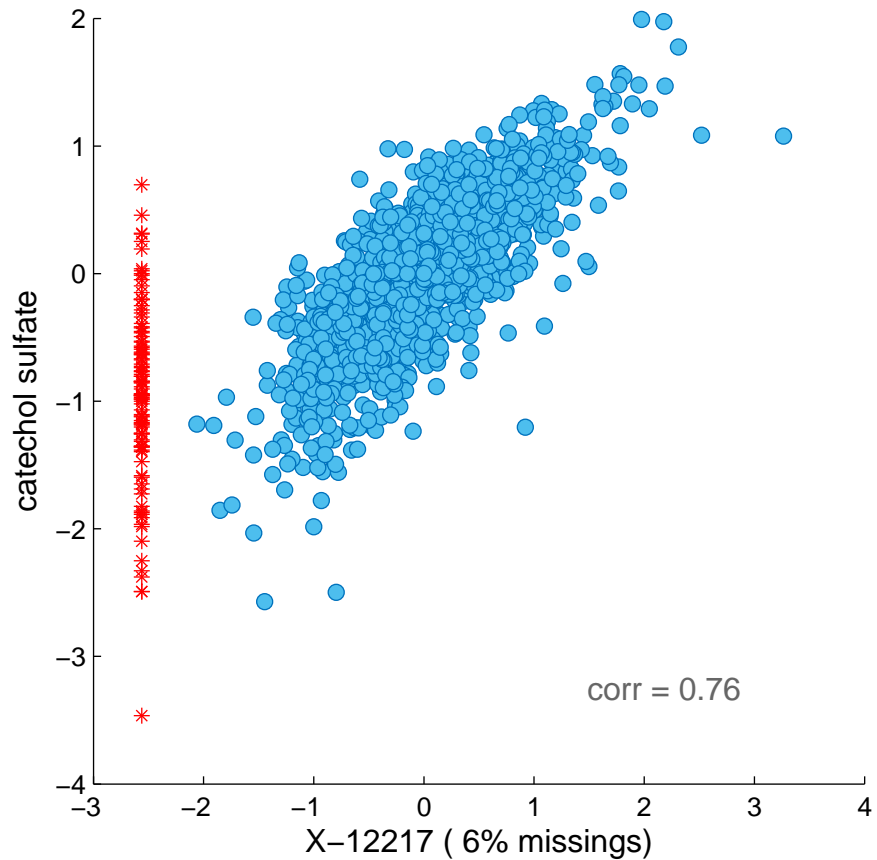

Concentrations of catechol sulfate in  
missing and observed X-12217

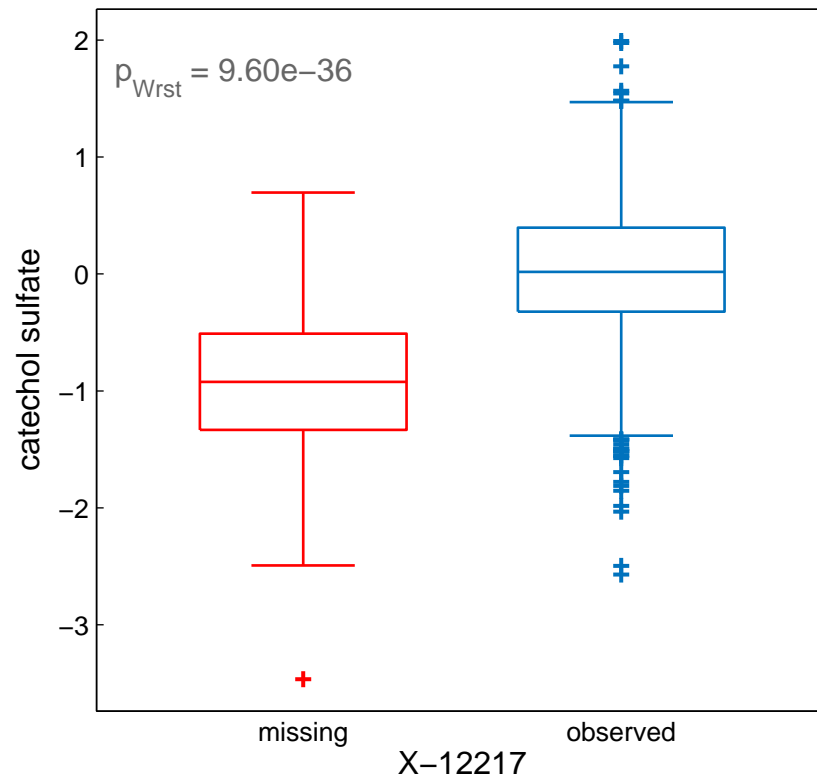

Missing values of X-12230  
in X-12039

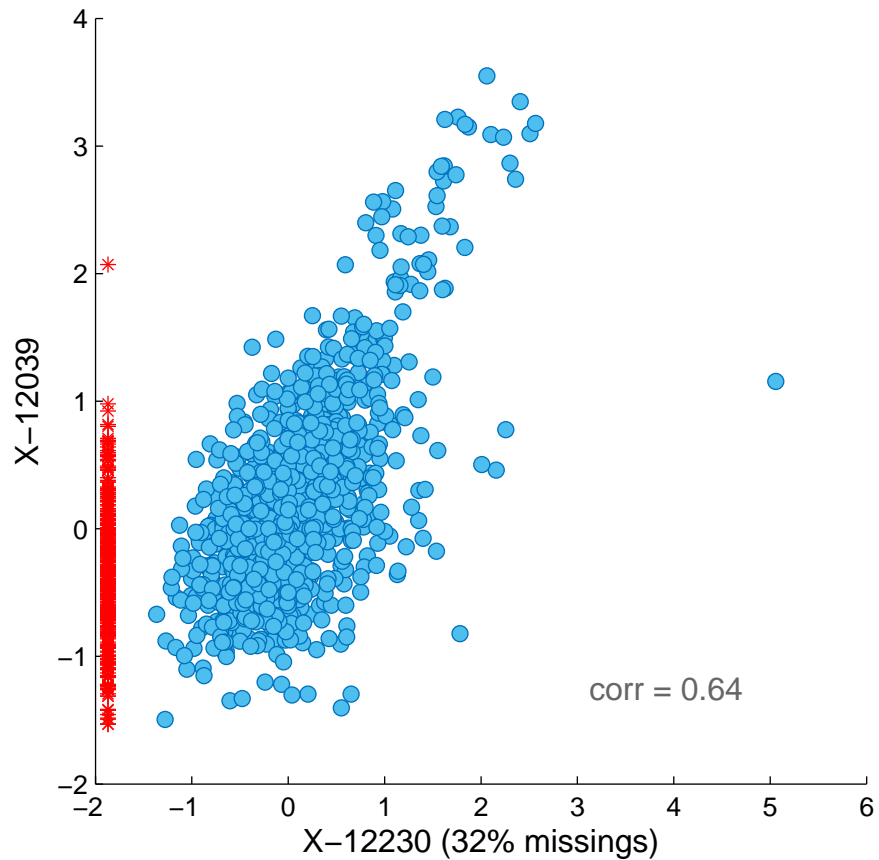

Concentrations of X-12039 in  
missing and observed X-12230

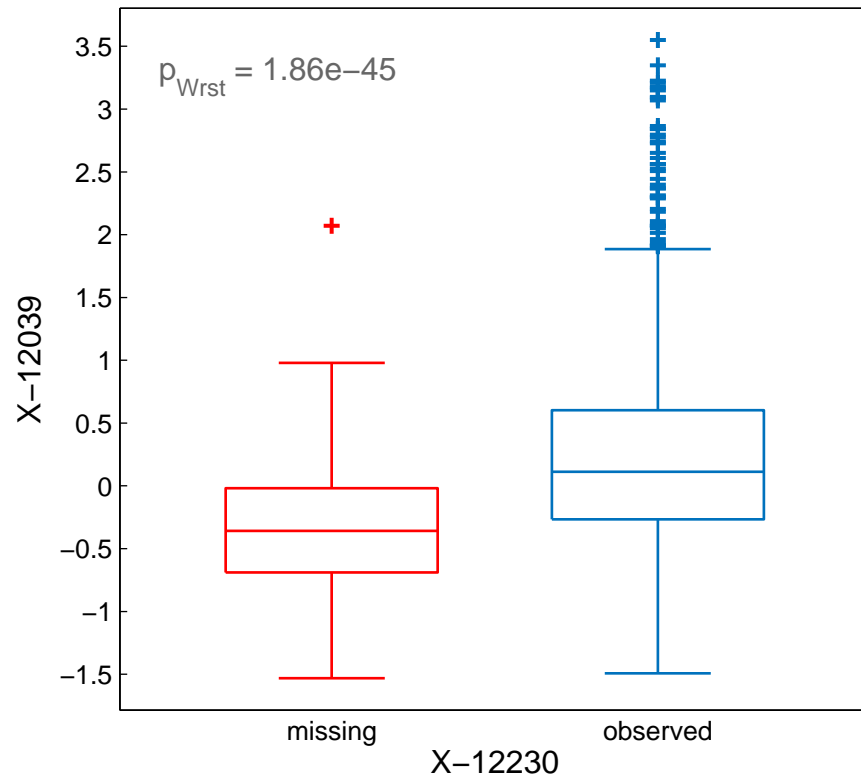

Missing values of X-12231  
in X-11452

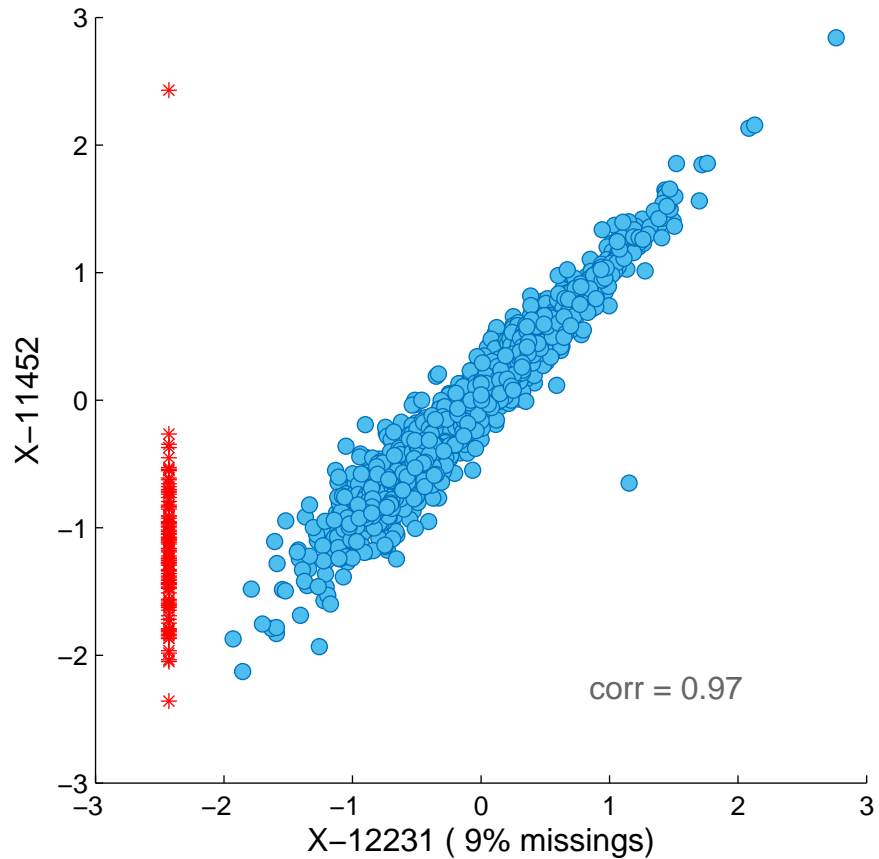

Concentrations of X-11452 in  
missing and observed X-12231

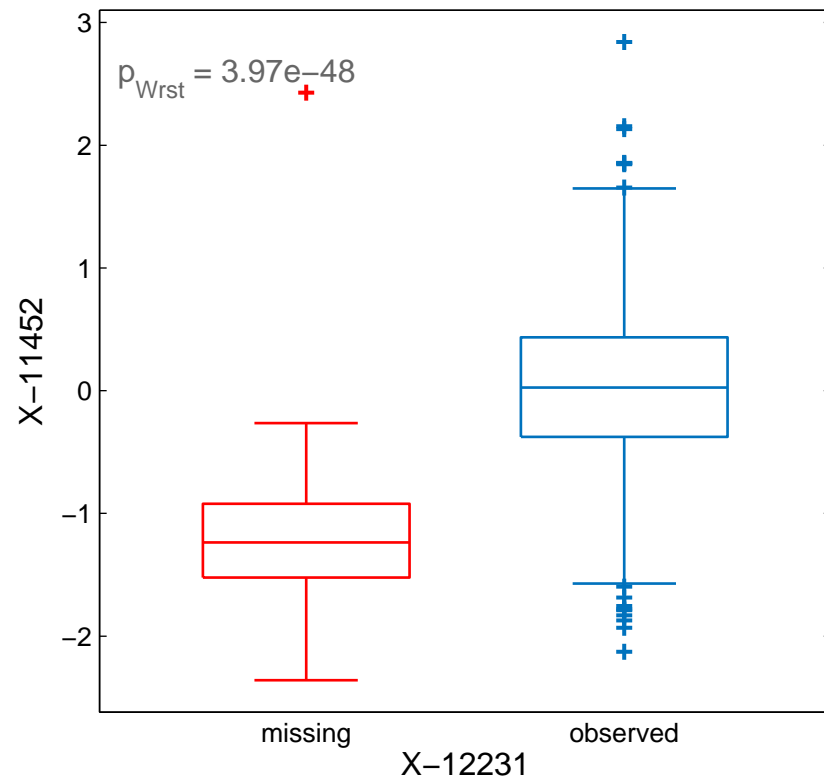

Missing values of 2-methylbutyrylcarnitine in gamma-glutamylleucine

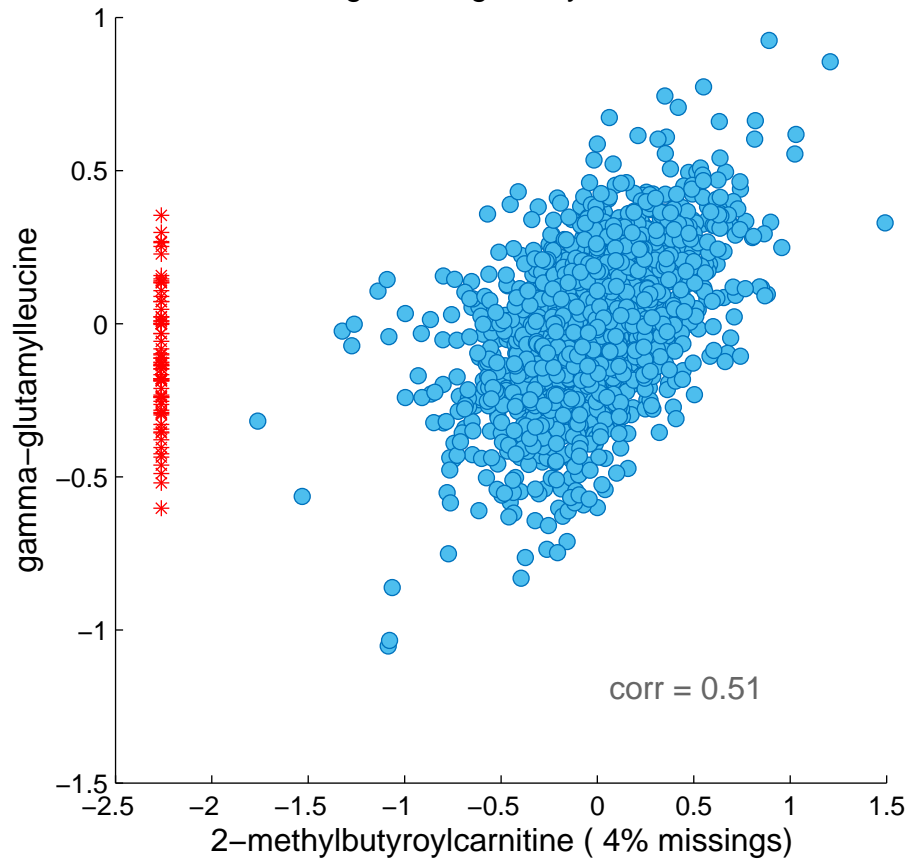

Concentrations of gamma-glutamylleucine in missing and observed 2-methylbutyrylcarnitine

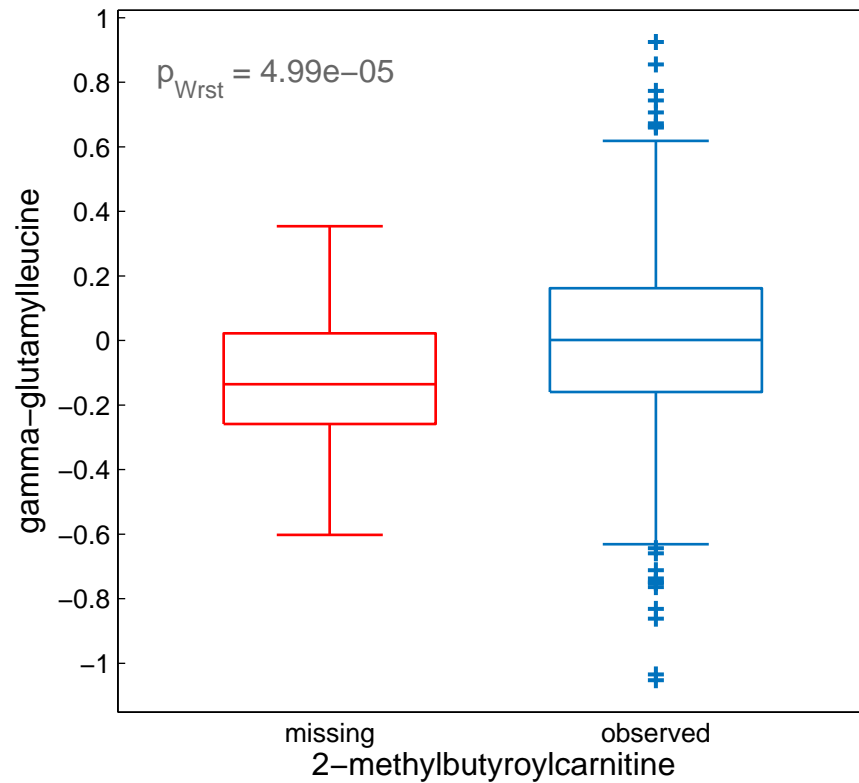

Missing values of X-12236  
in X-12704

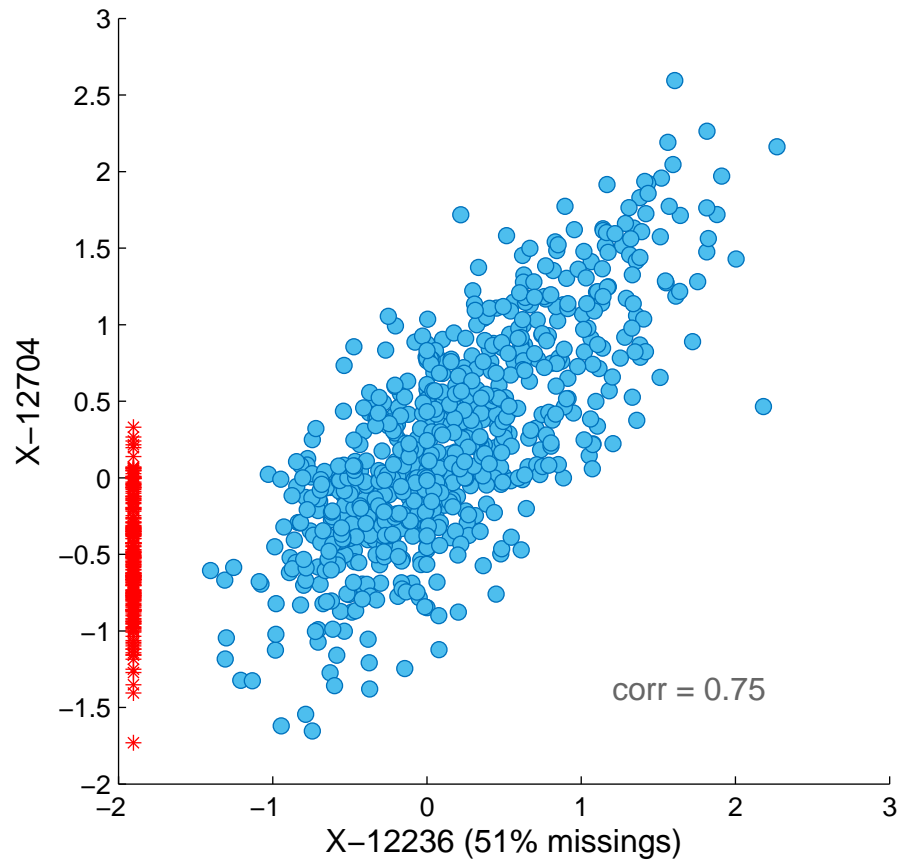

Concentrations of X-12704 in  
missing and observed X-12236

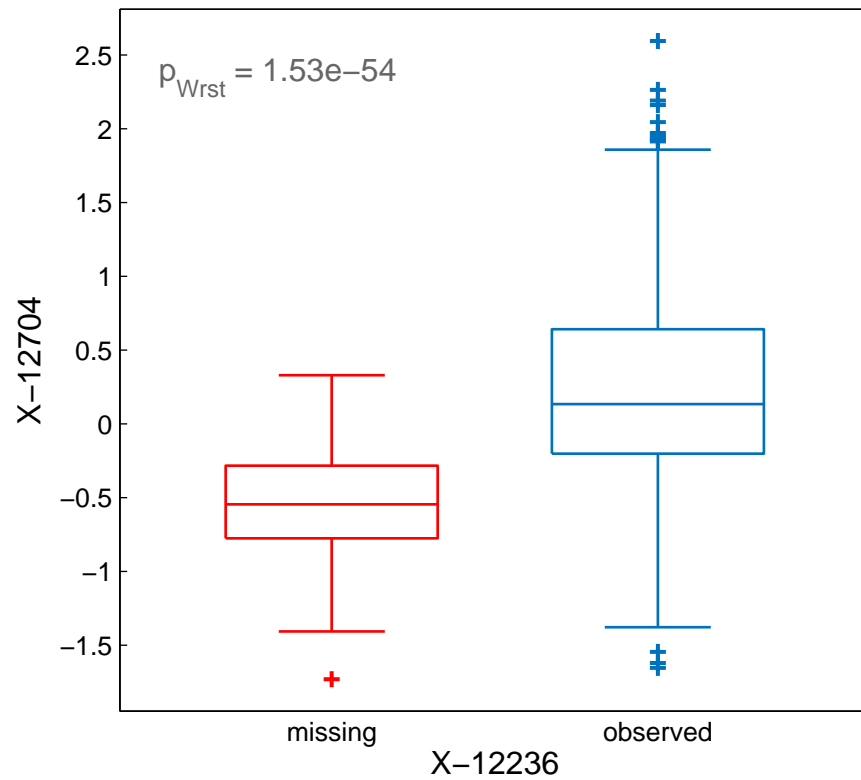

Missing values of X-12253  
in X-09789

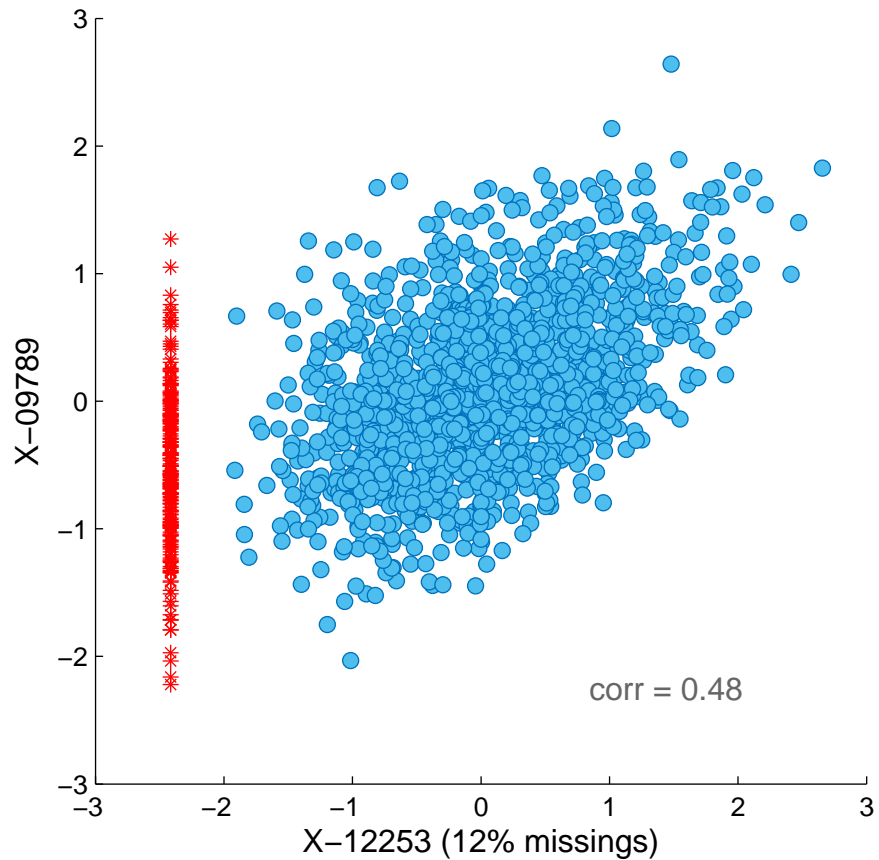

Concentrations of X-09789 in  
missing and observed X-12253

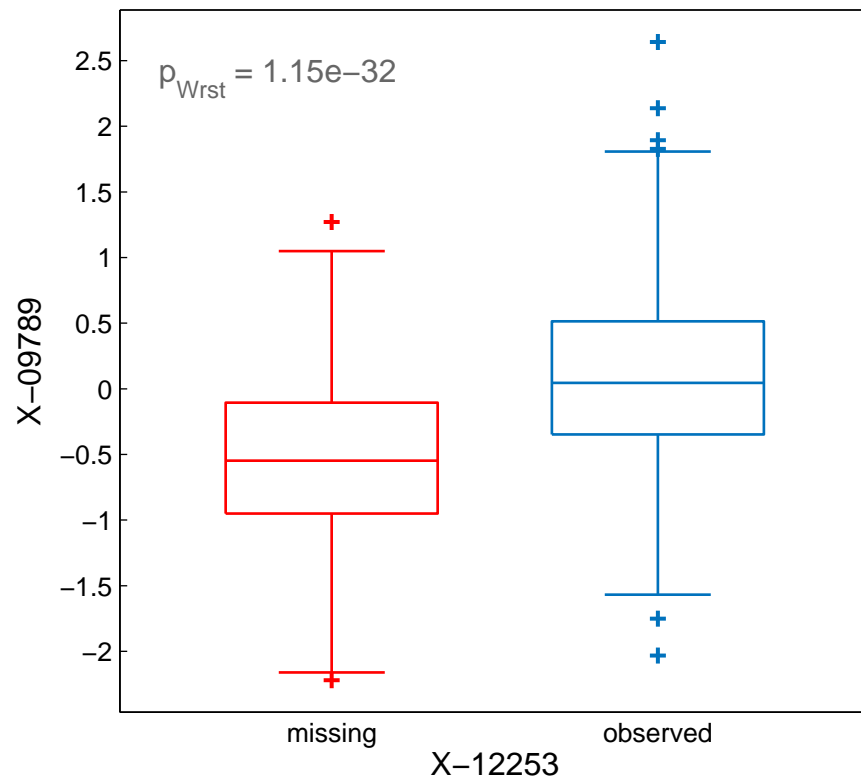



Missing values of X-12261  
in X-12013

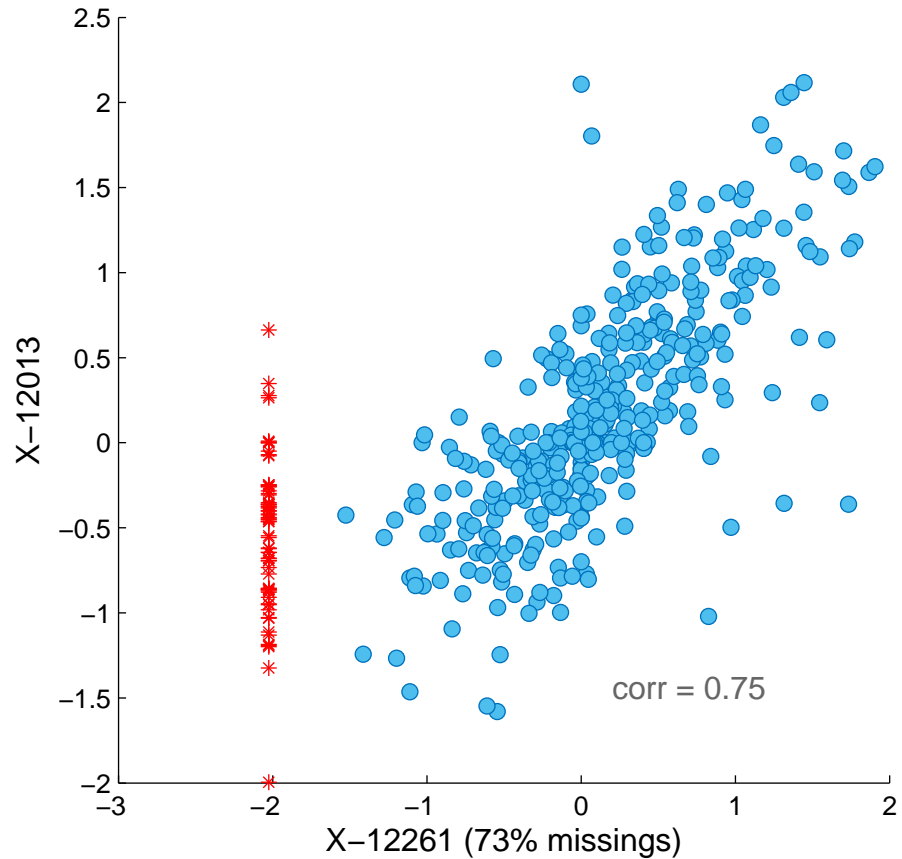

Concentrations of X-12013 in  
missing and observed X-12261

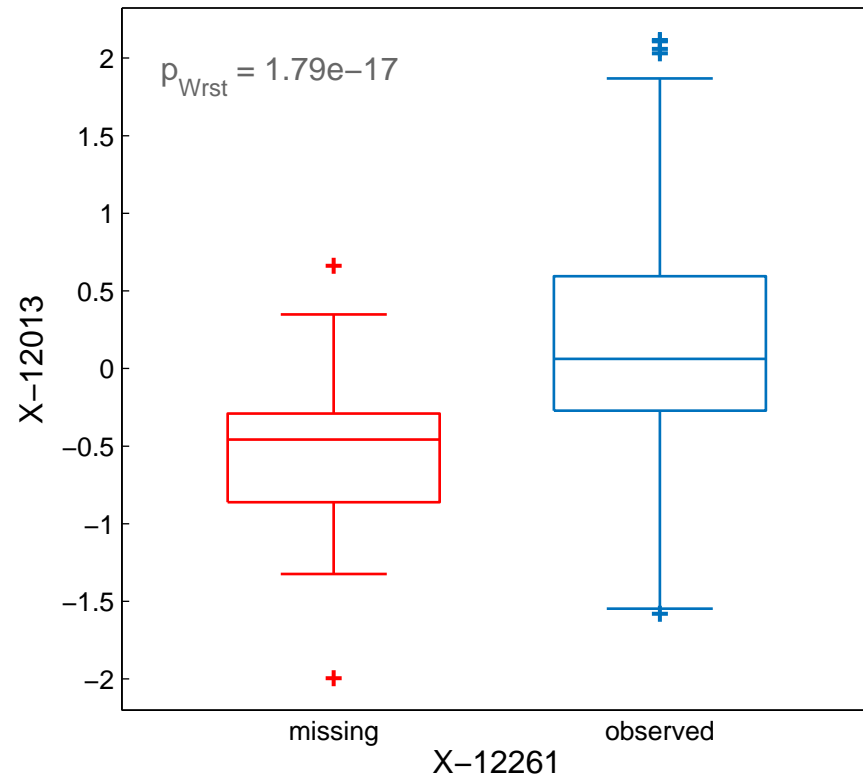

Missing values of X-12263  
in 2-hydroxyhippurate (salicylurate)

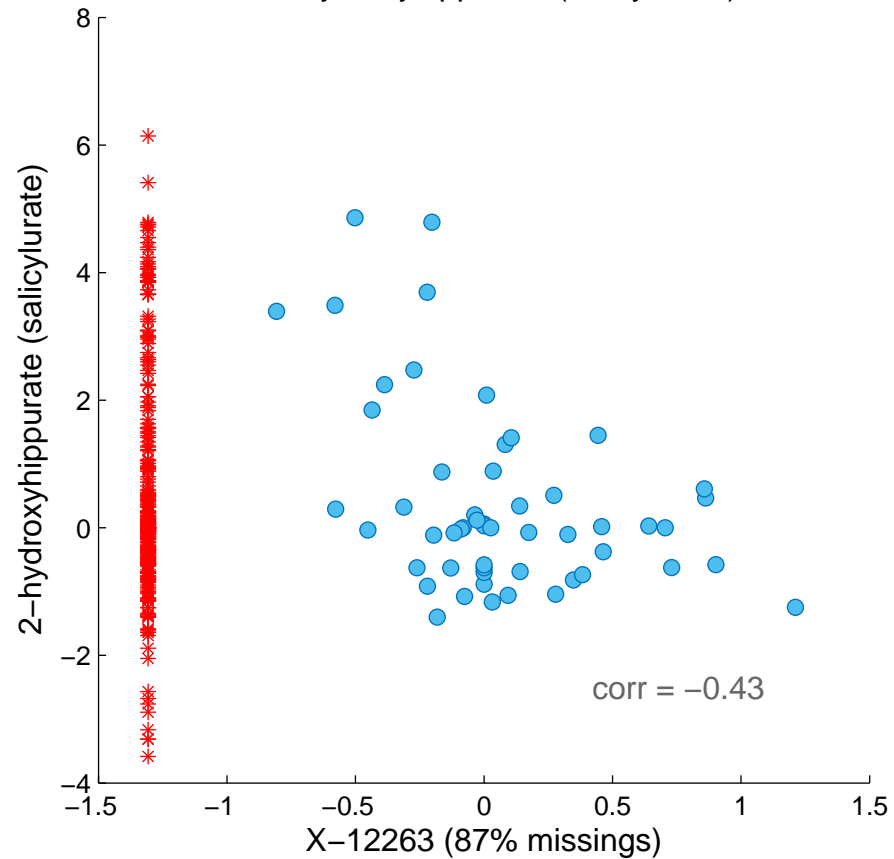

Concentrations of 2-hydroxyhippurate (salicylurate) in  
missing and observed X-12263

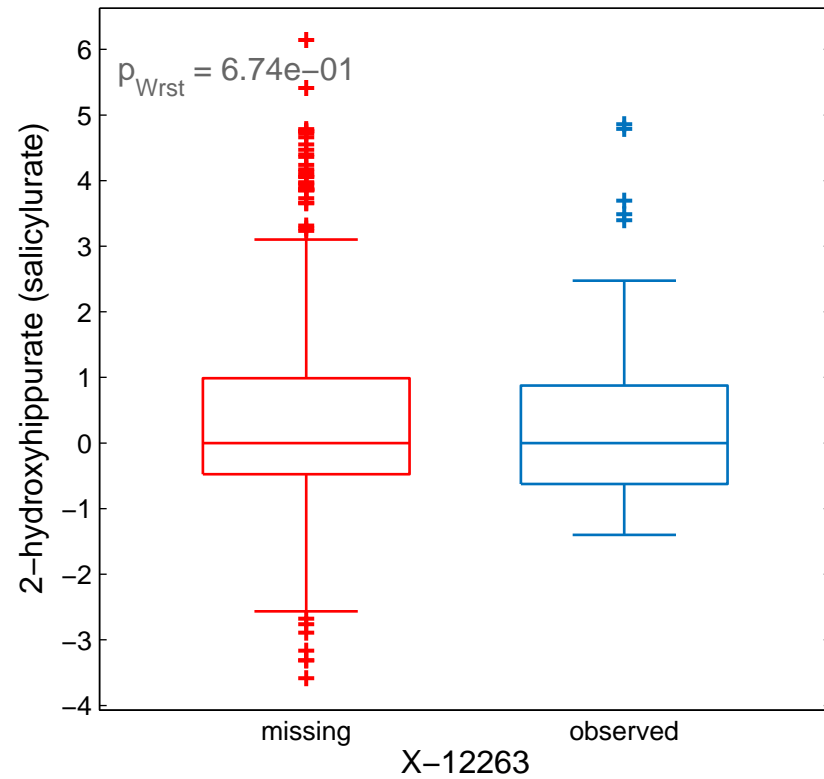

Missing values of X-12405  
in 3-indoxyl sulfate

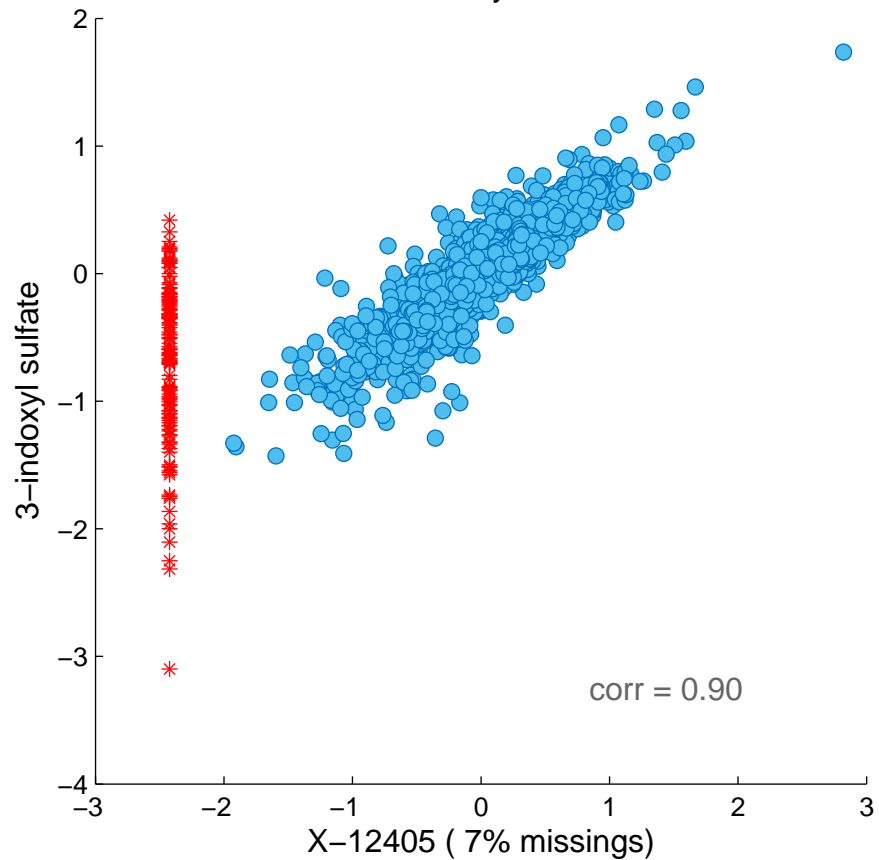

Concentrations of 3-indoxyl sulfate in  
missing and observed X-12405

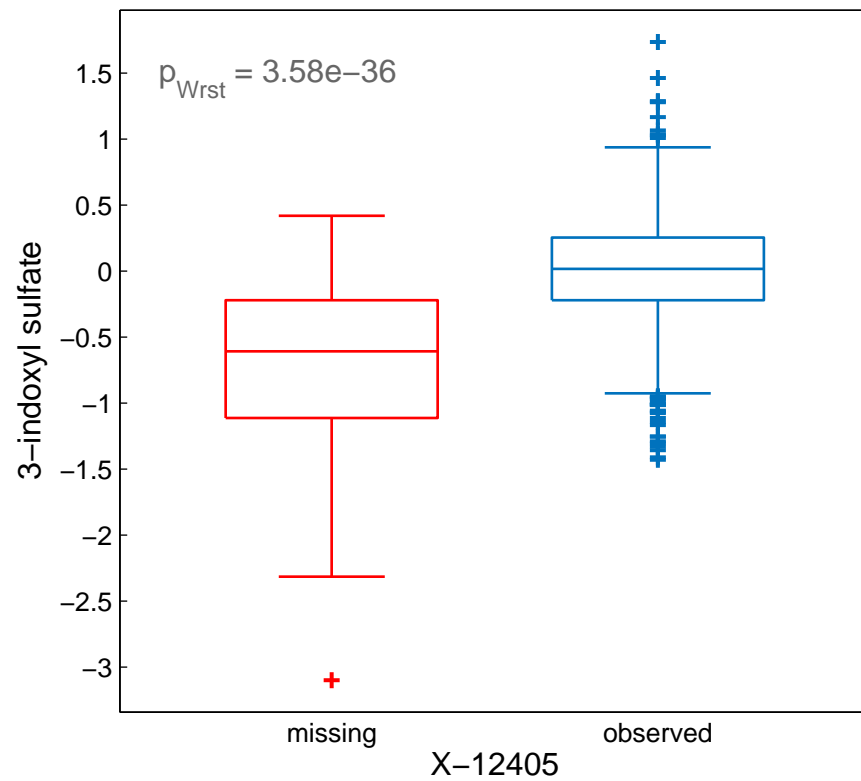

Missing values of X-12428  
in hippurate

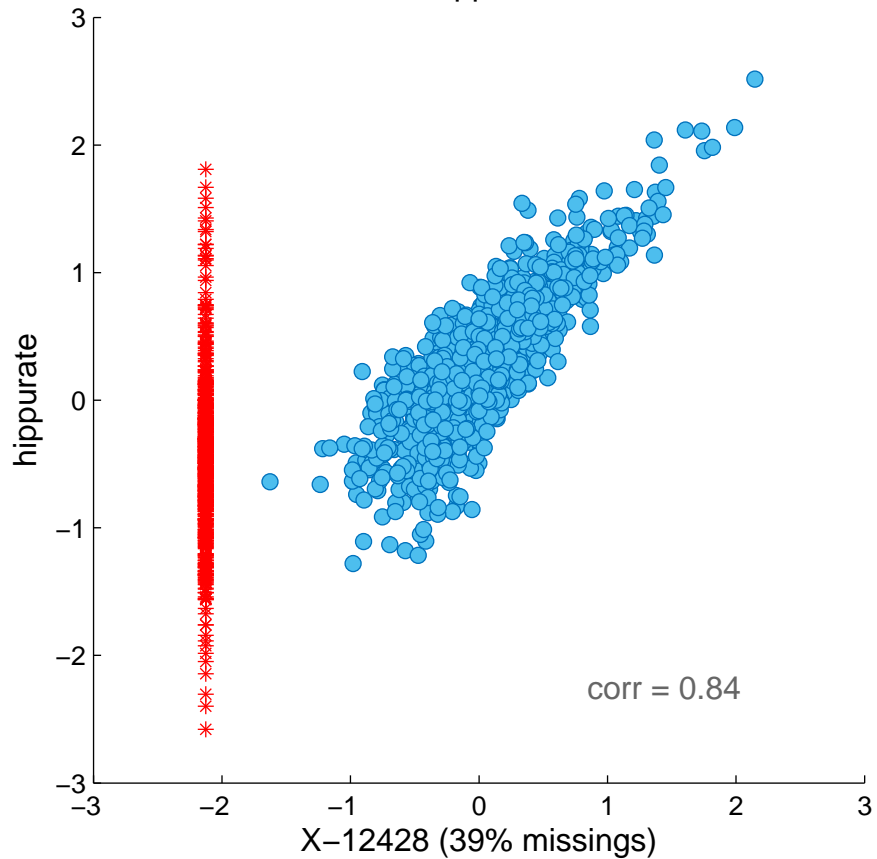

Concentrations of hippurate in  
missing and observed X-12428

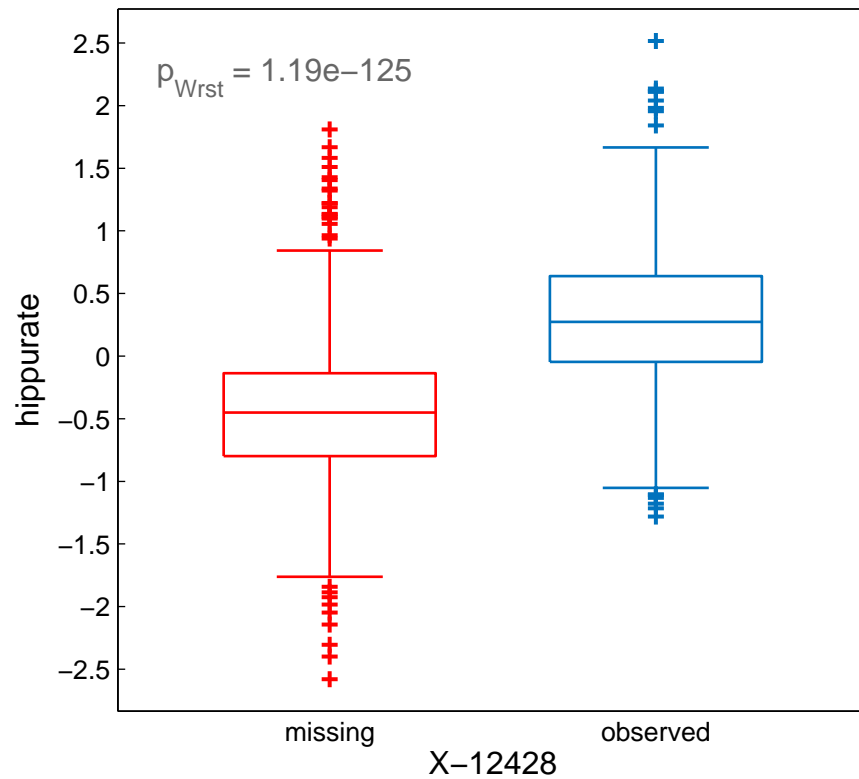

Missing values of 12-HETE  
in arachidonate (20:4n6)

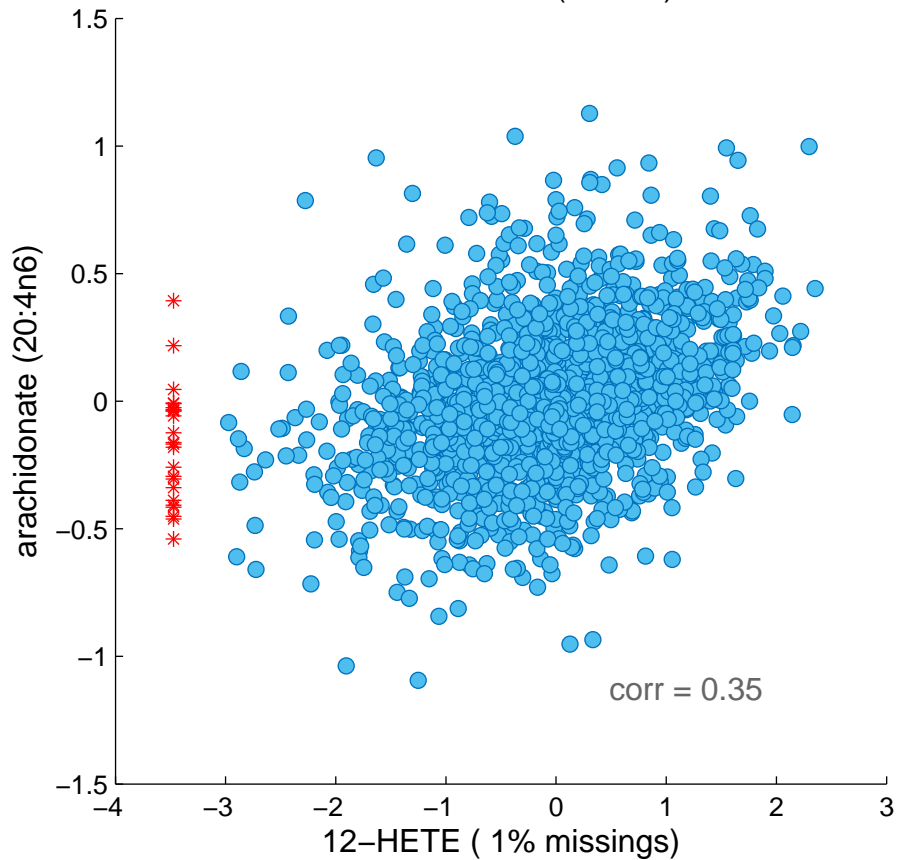

Concentrations of arachidonate (20:4n6) in  
missing and observed 12-HETE

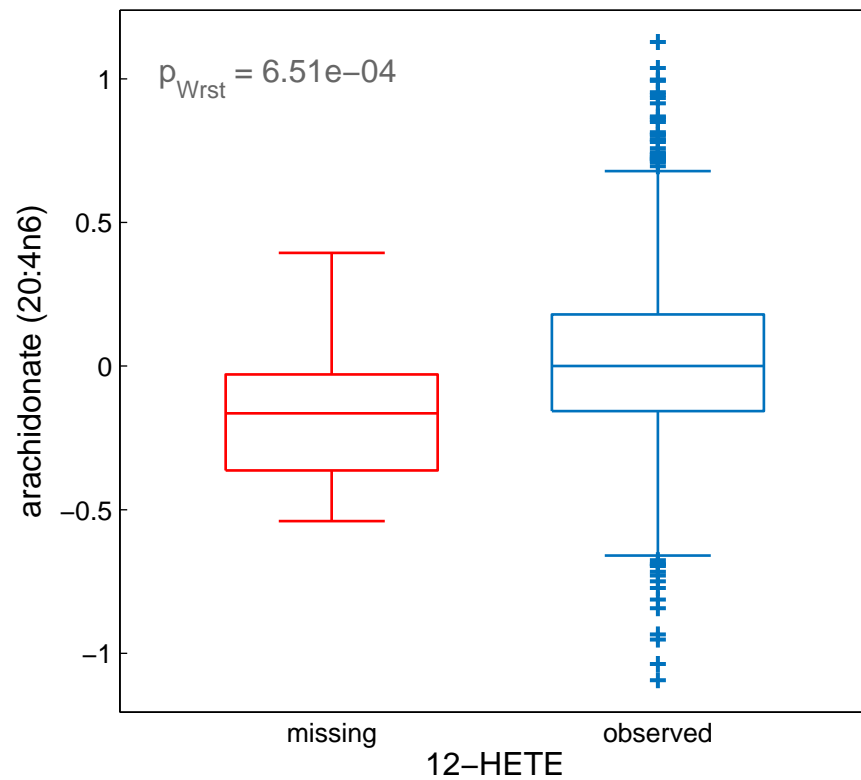

Missing values of 2-oleoylglycerophosphocholine  
in 1-oleoylglycerophosphocholine

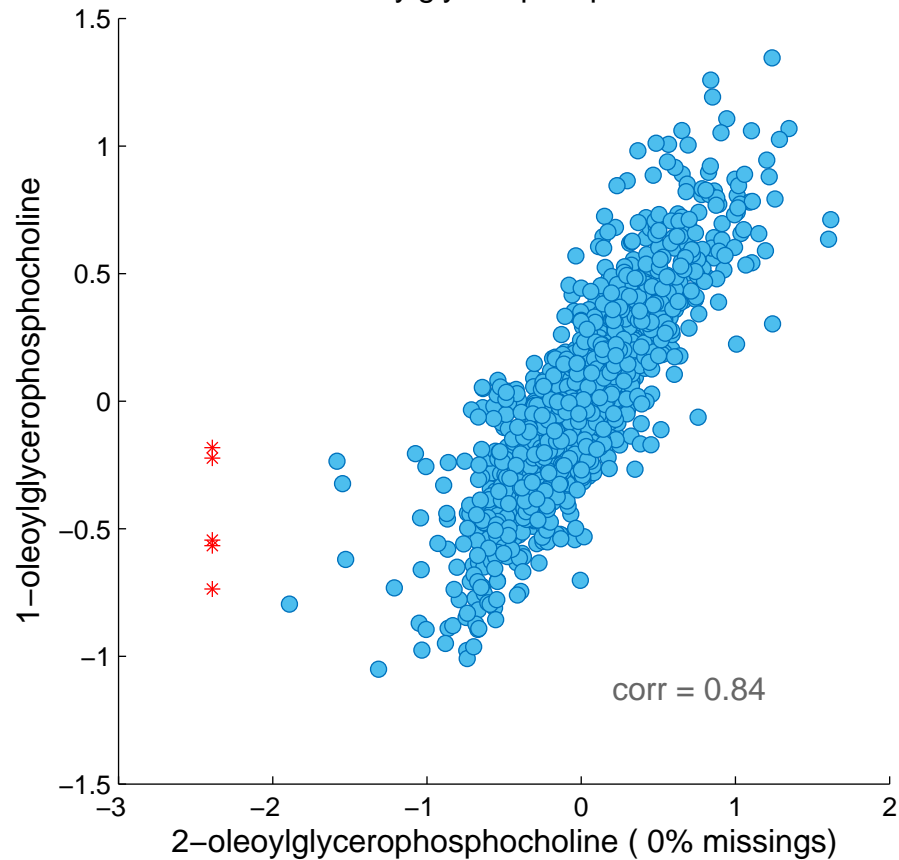

Concentrations of 1-oleoylglycerophosphocholine in  
missing and observed 2-oleoylglycerophosphocholine

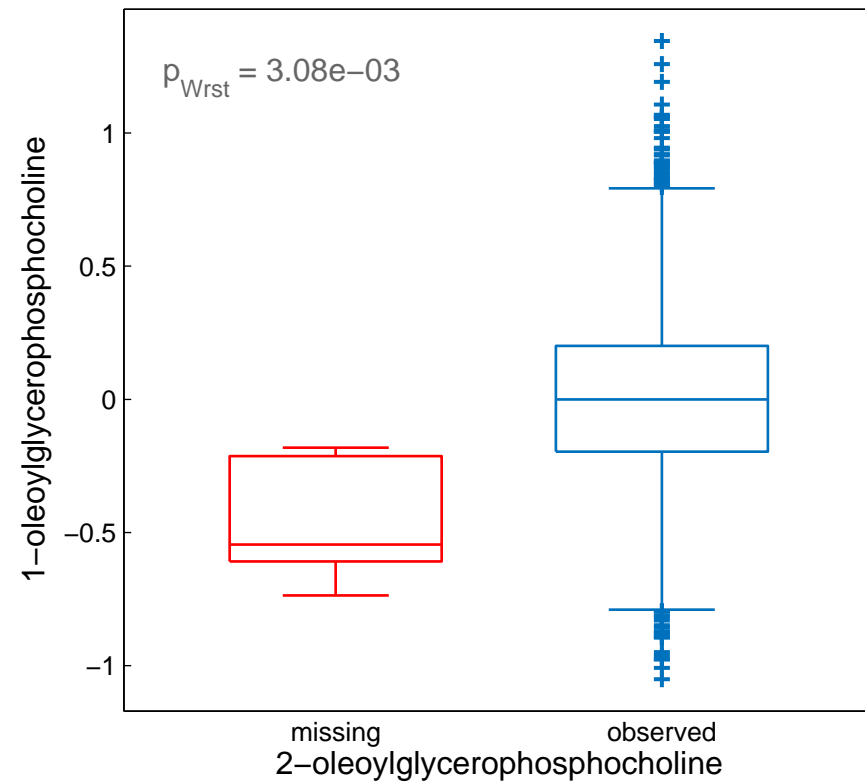

Missing values of X-12450  
in linoleate (18:2n6)

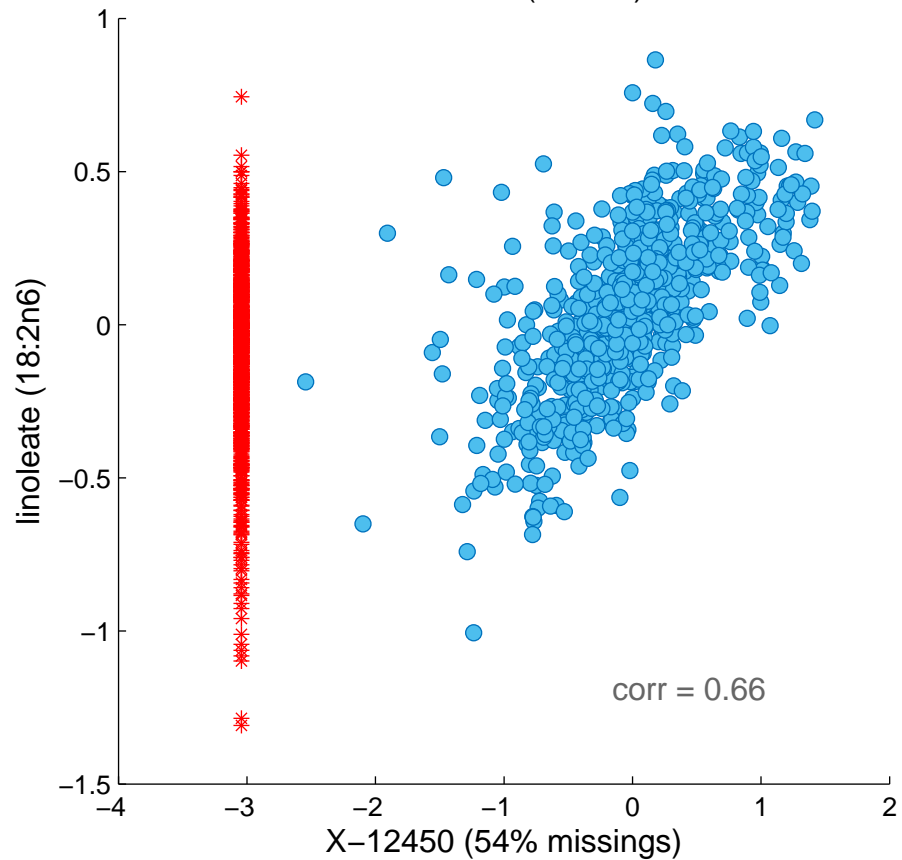

Concentrations of linoleate (18:2n6) in  
missing and observed X-12450

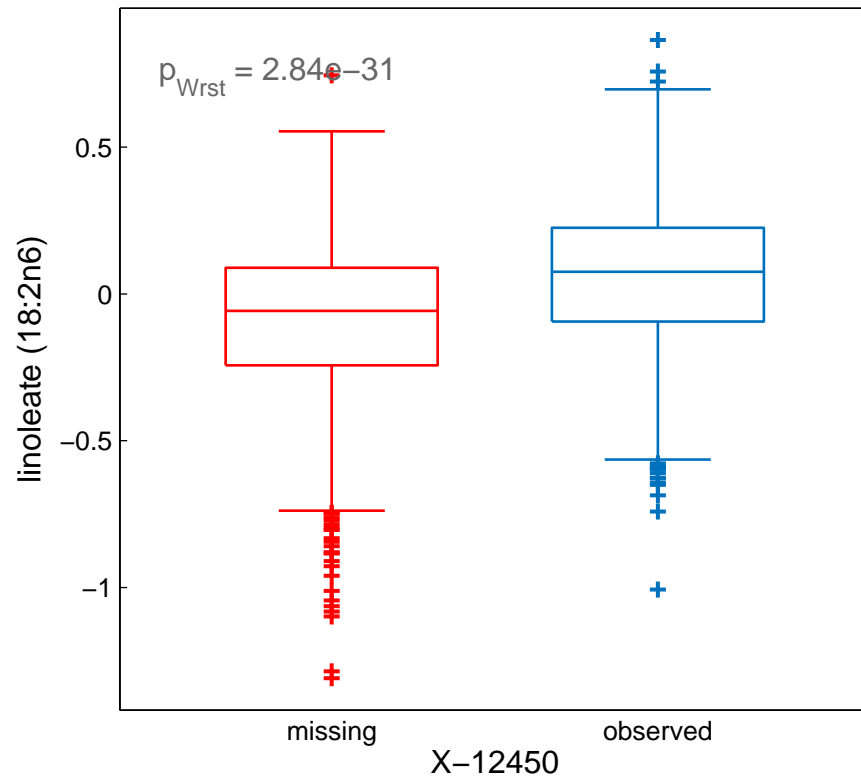

Missing values of X-12456  
in X-12063

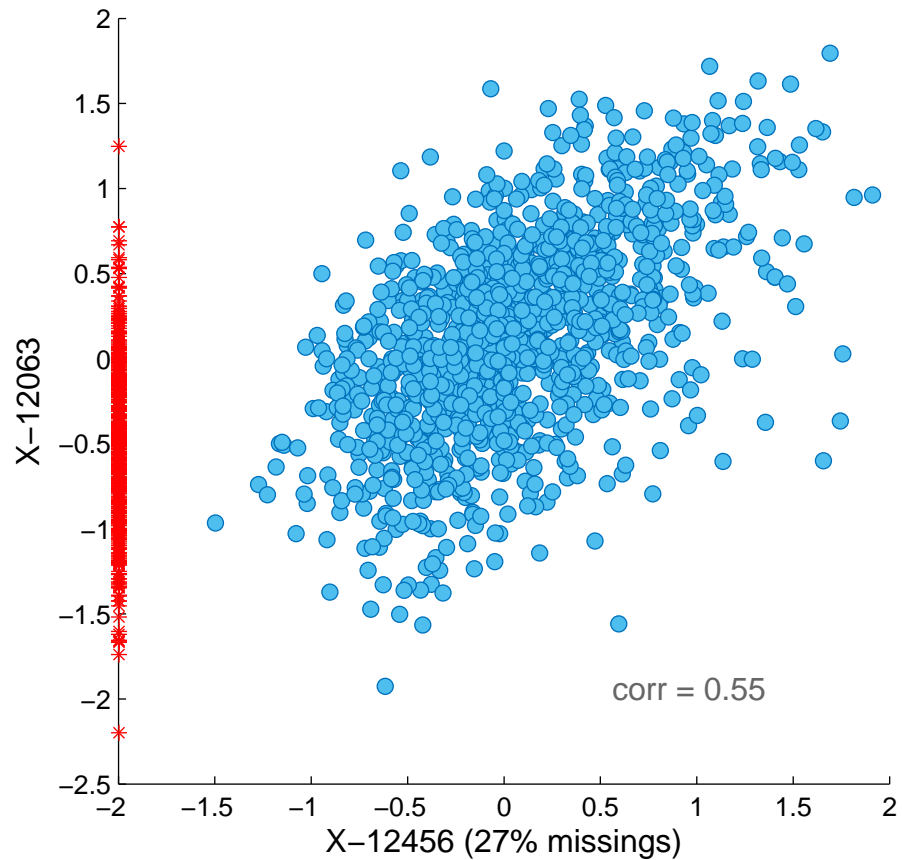

Concentrations of X-12063 in  
missing and observed X-12456

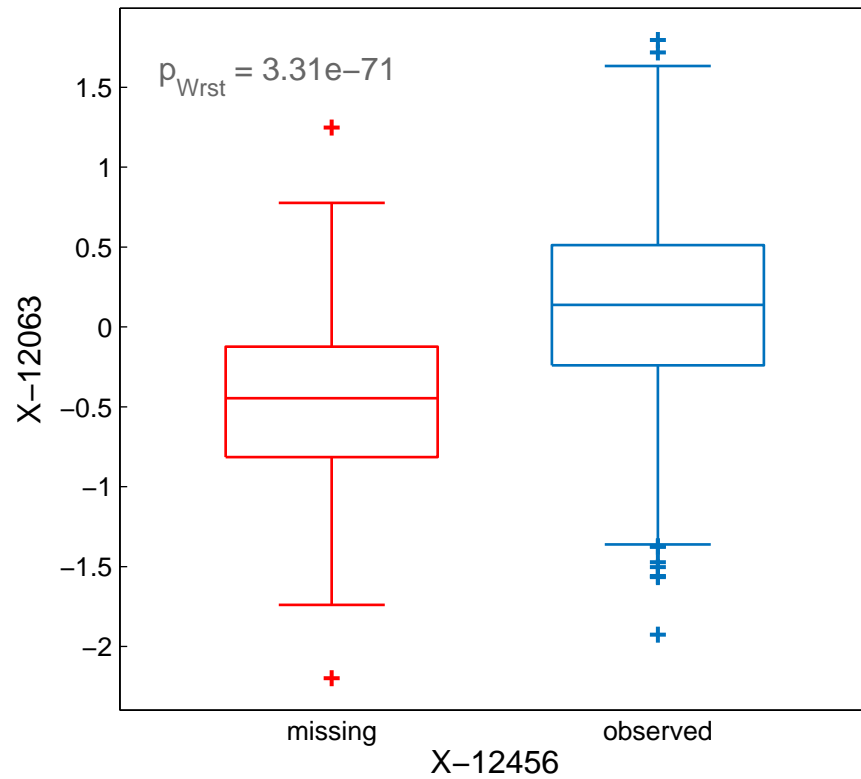



Missing values of X-12465  
in acetylcarnitine

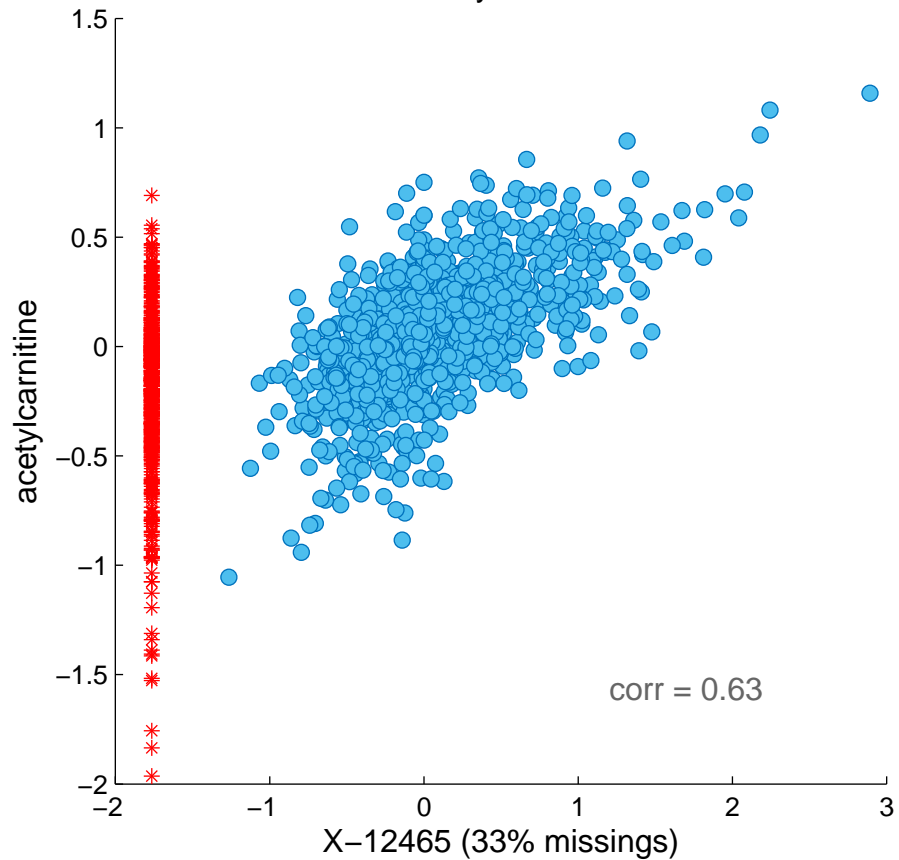

Concentrations of acetylcarnitine in  
missing and observed X-12465

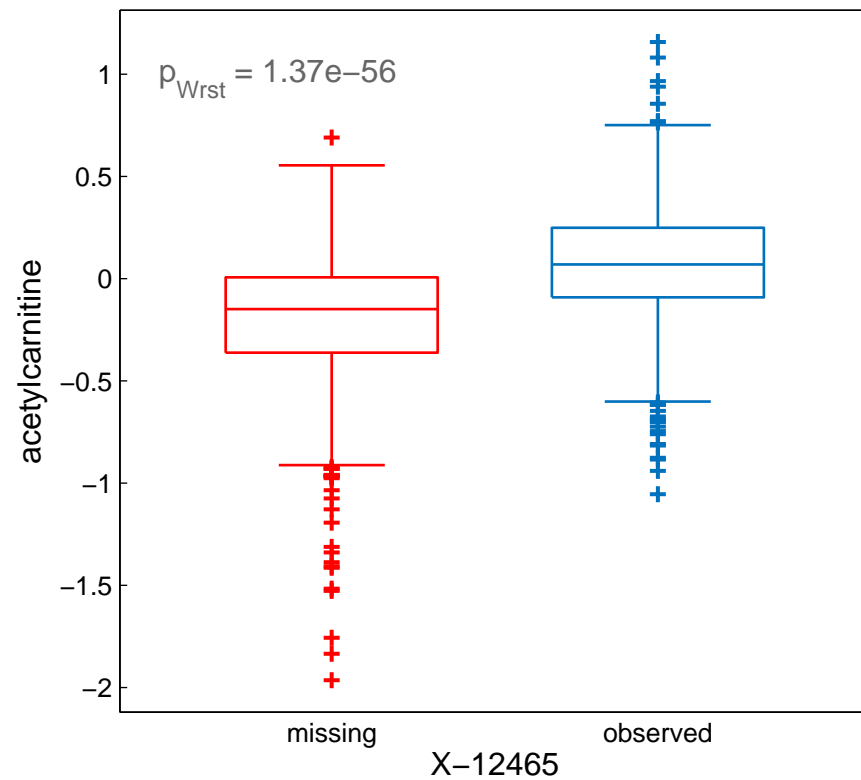

Missing values of X-12510  
in N-acetylornithine

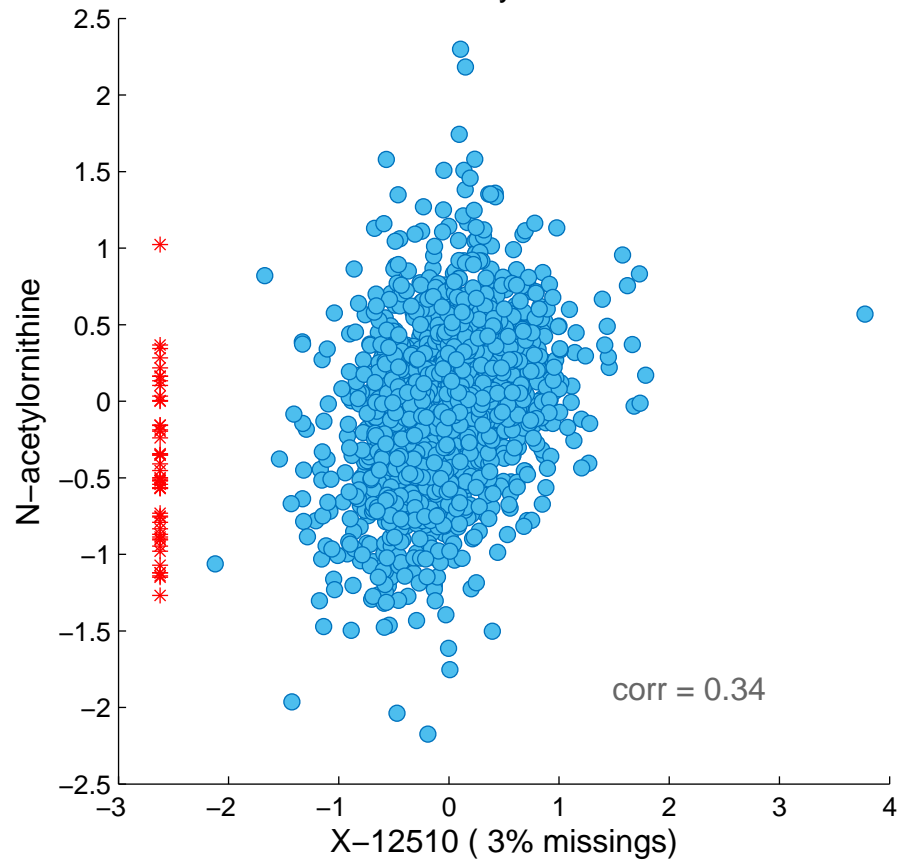

Concentrations of N-acetylornithine in  
missing and observed X-12510

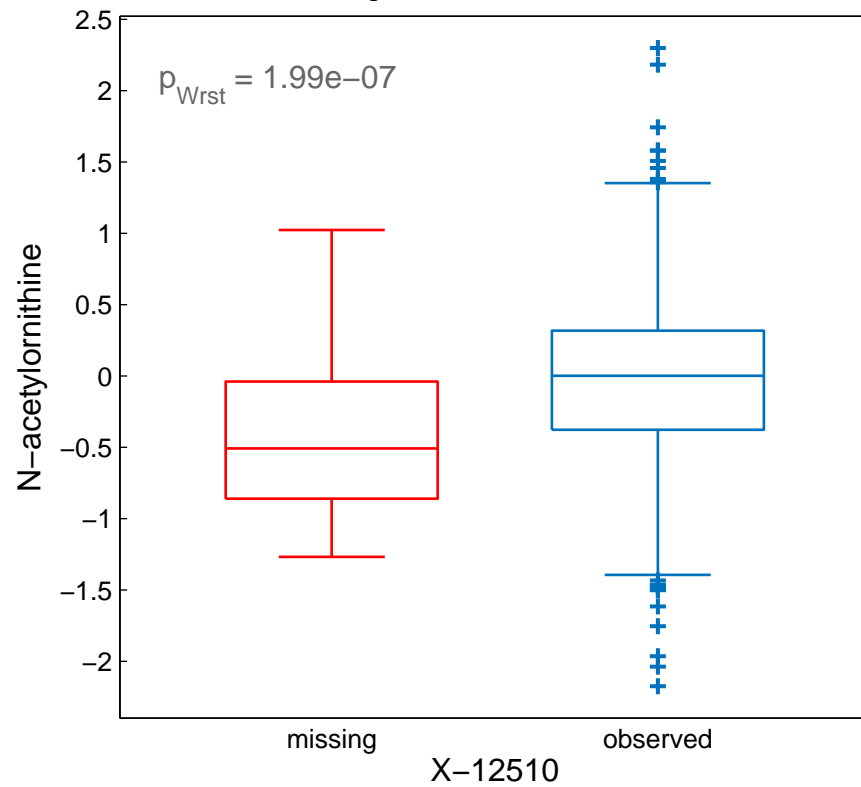

Missing values of X-12627  
in docosapentaenoate (n3 DPA; 22:5n3)

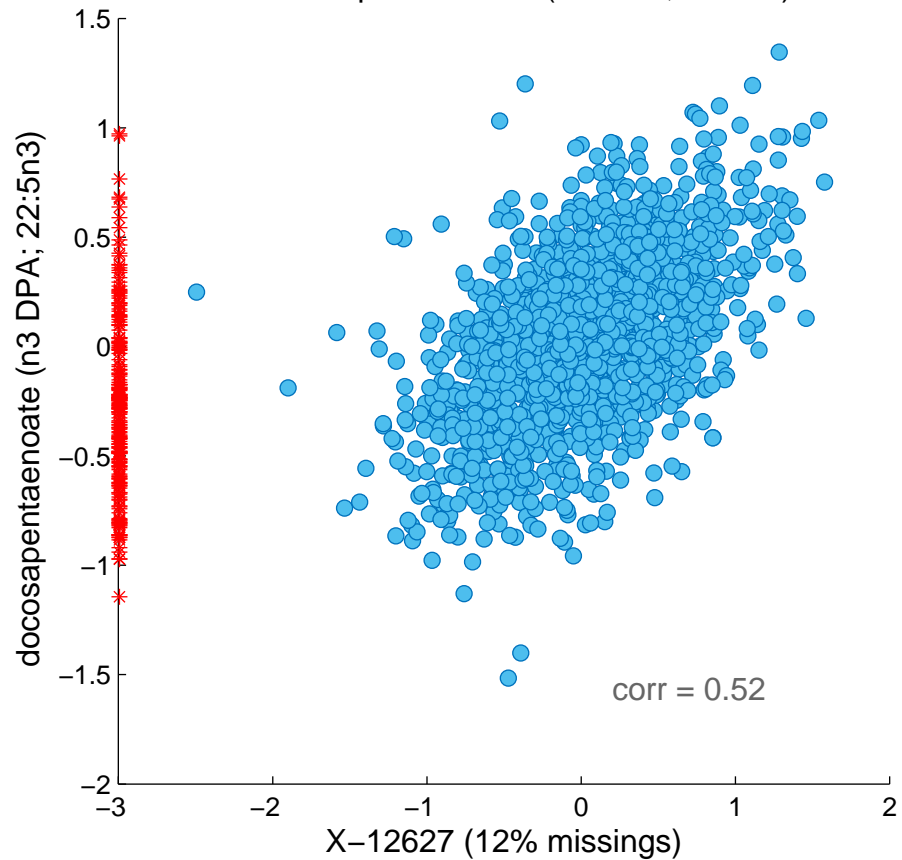

Concentrations of docosapentaenoate (n3 DPA; 22:5n3) in  
missing and observed X-12627

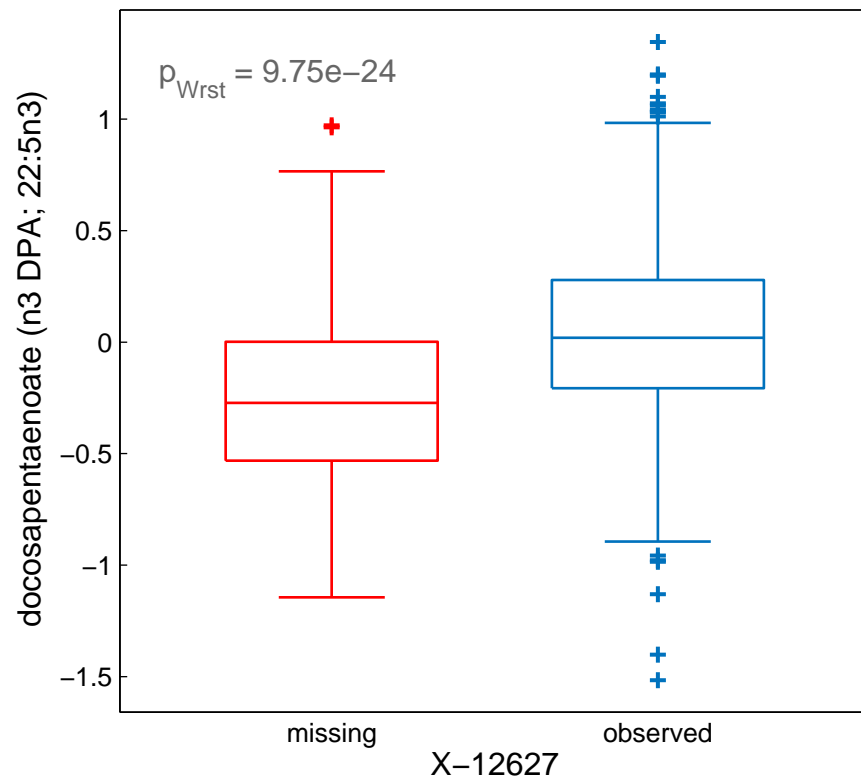

Missing values of X-12644  
in X-12645

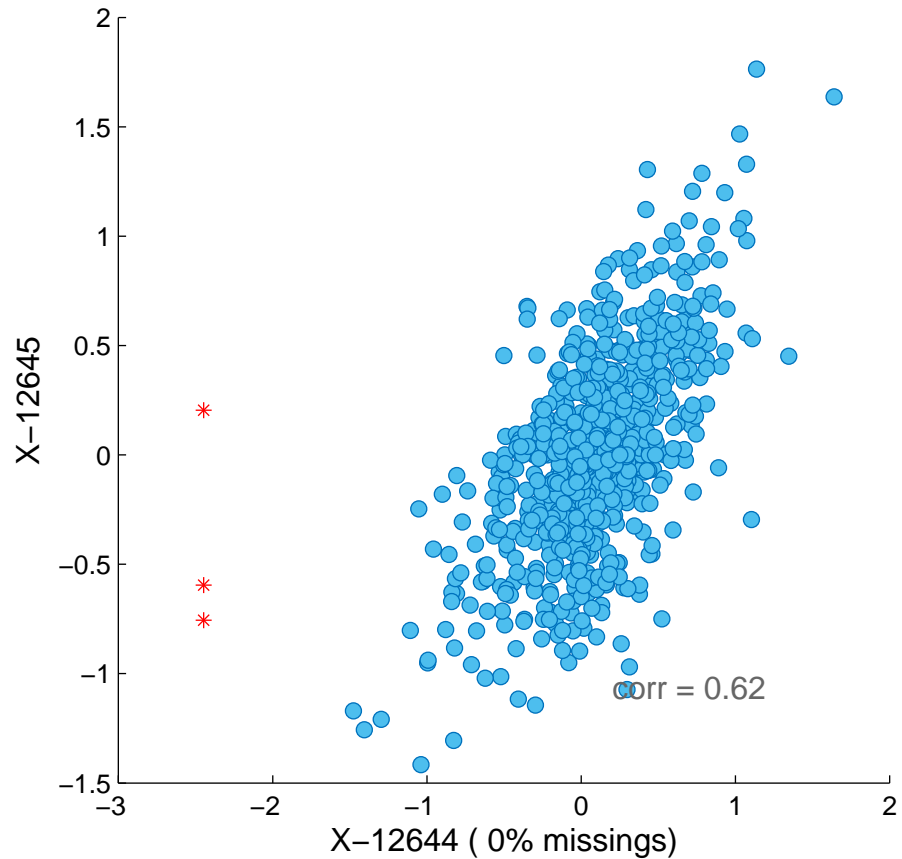

Concentrations of X-12645 in  
missing and observed X-12644

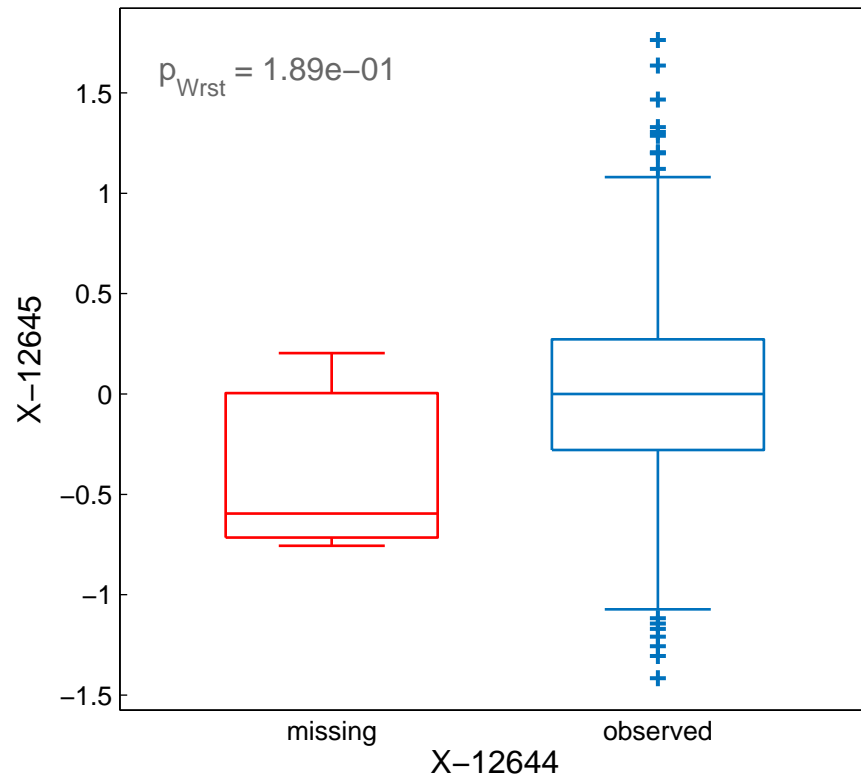

Missing values of X-12645  
in X-12644

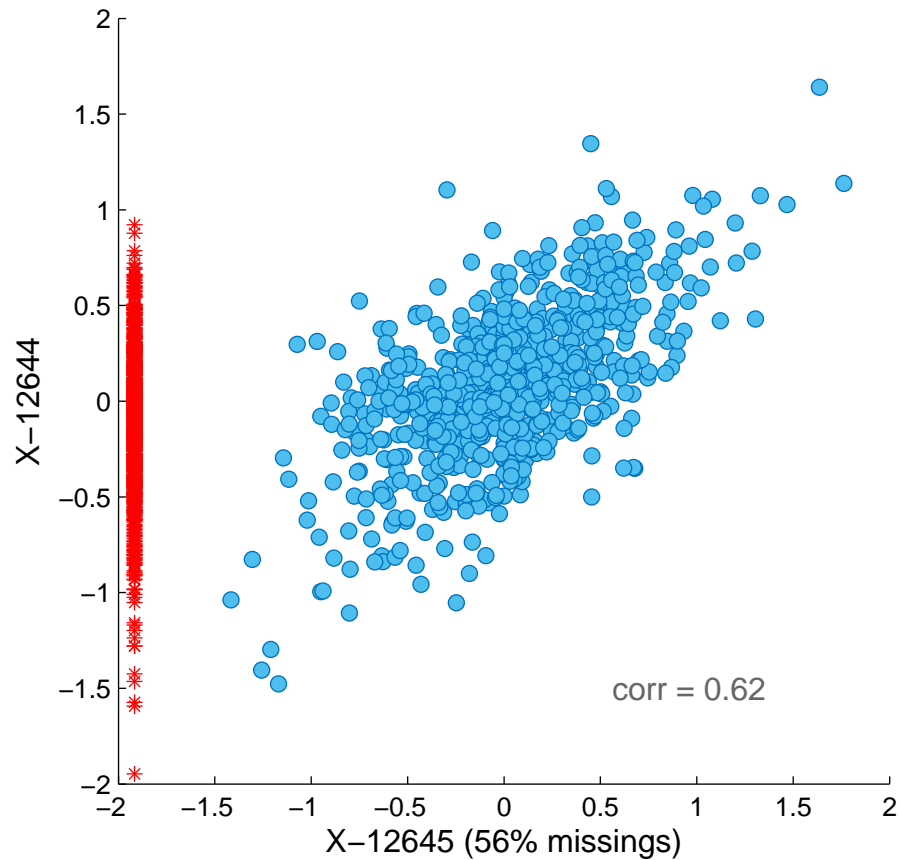

Concentrations of X-12644 in  
missing and observed X-12645

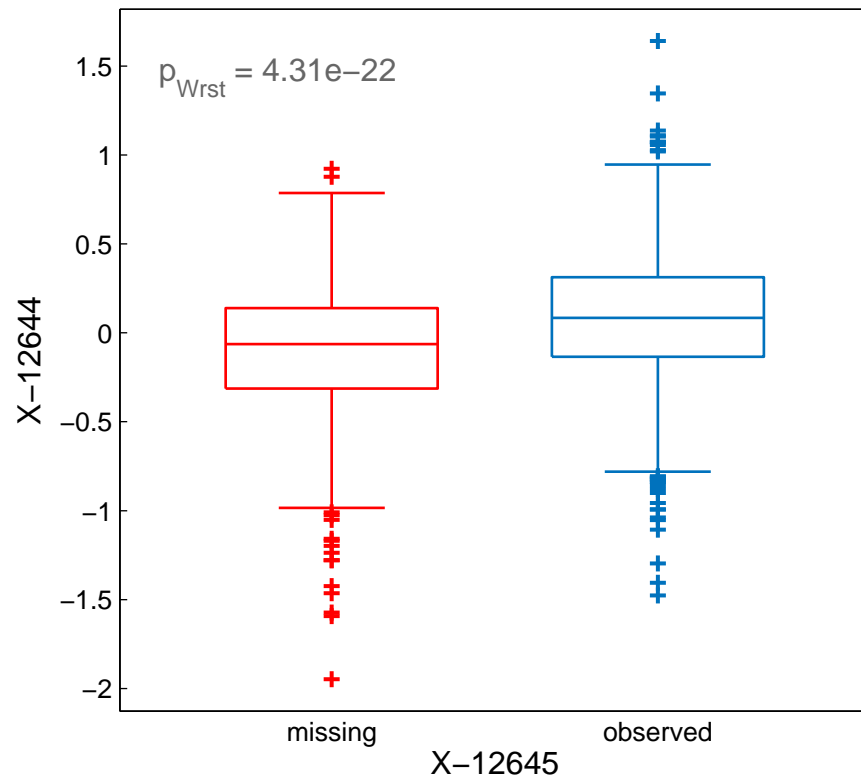

Missing values of X-12680  
in proline

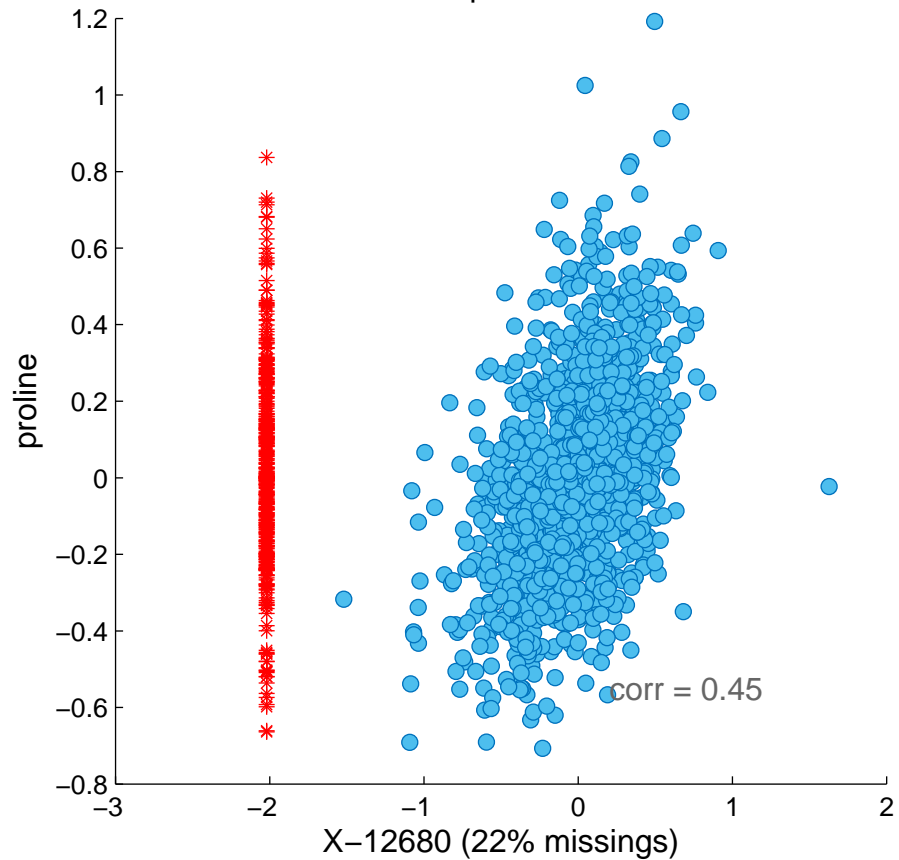

Concentrations of proline in  
missing and observed X-12680

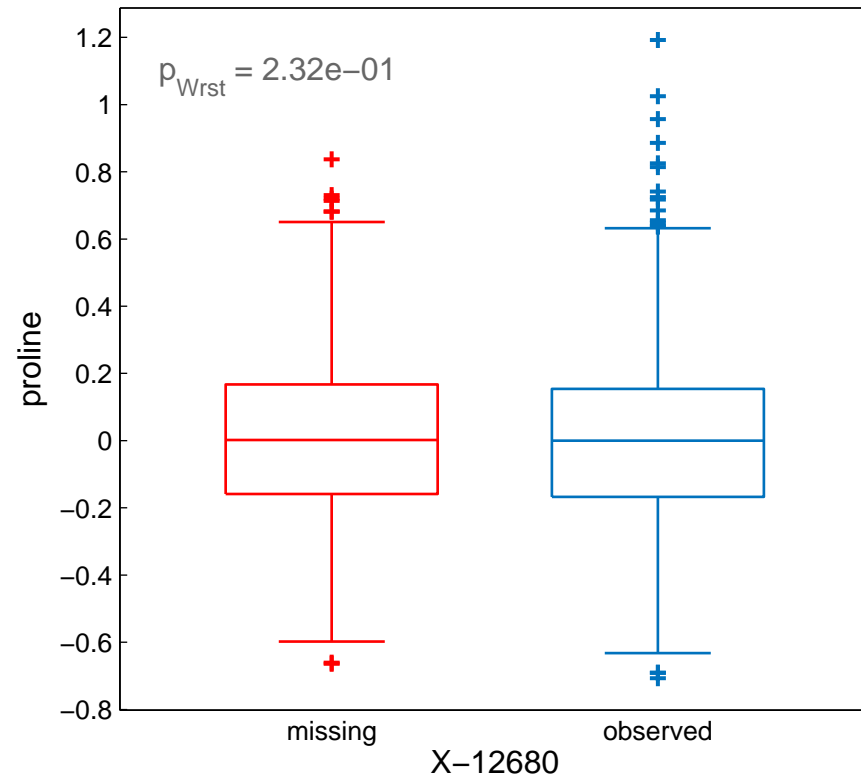

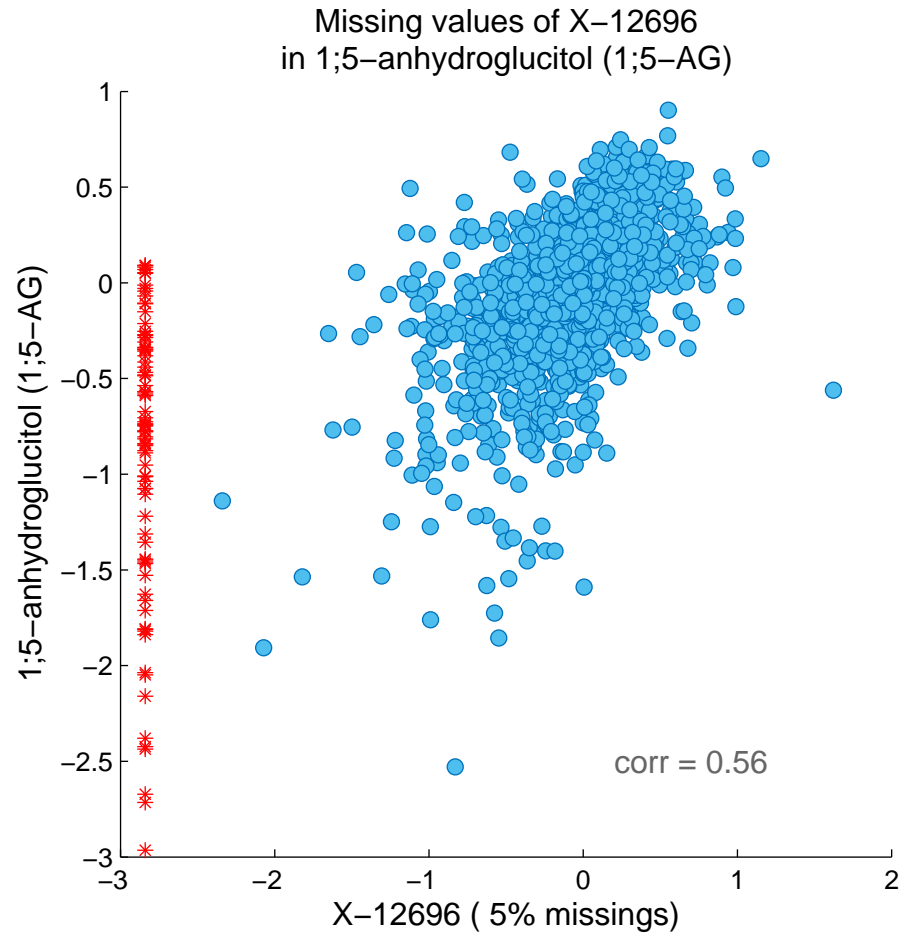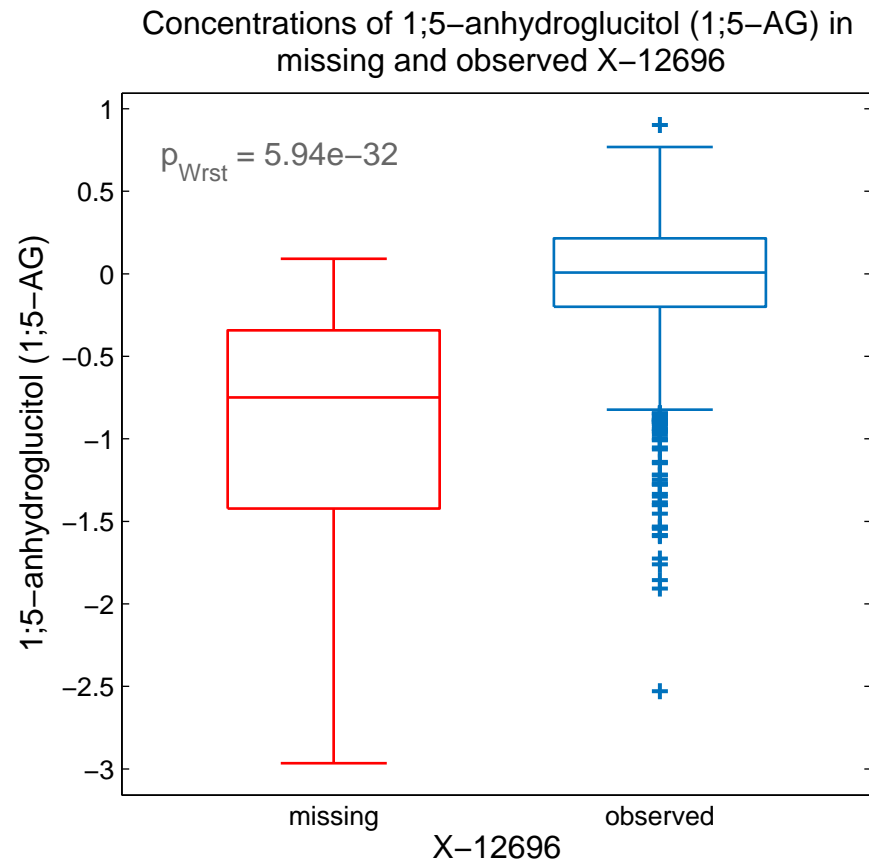

Missing values of X-12704  
in X-12717

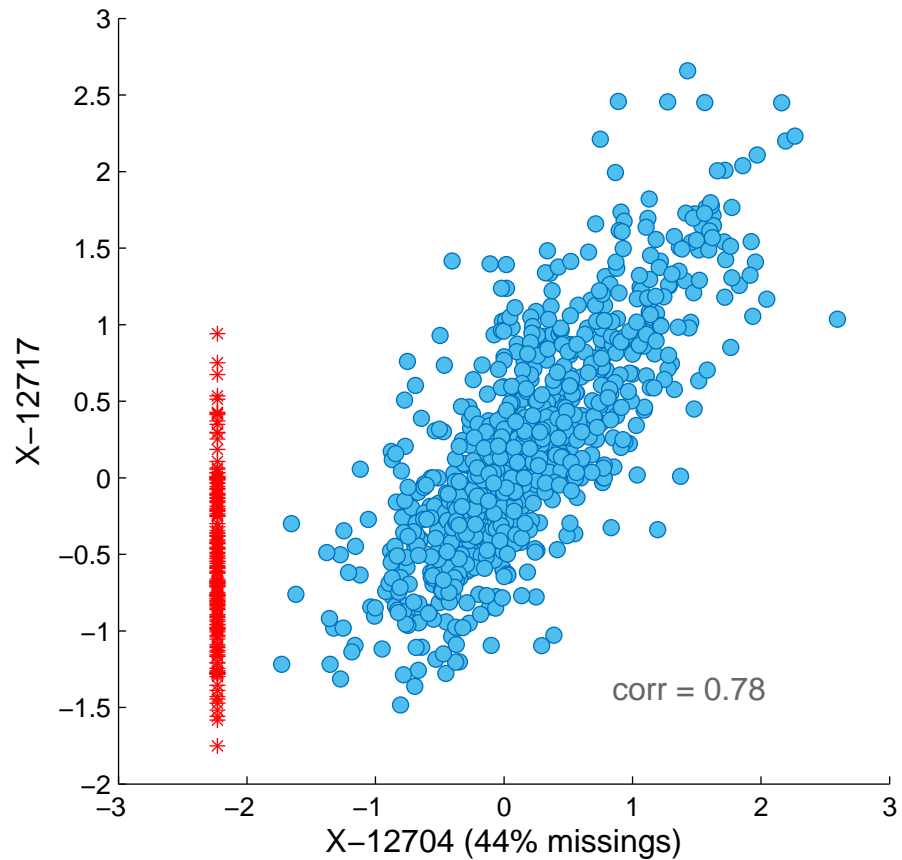

Concentrations of X-12717 in  
missing and observed X-12704

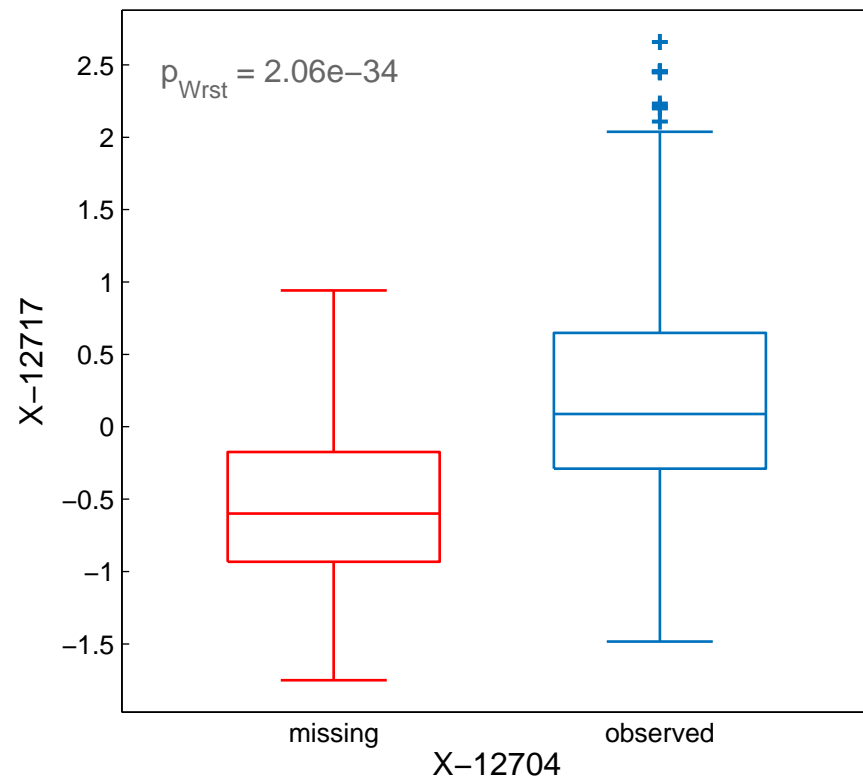



Missing values of X-12711  
in X-12253

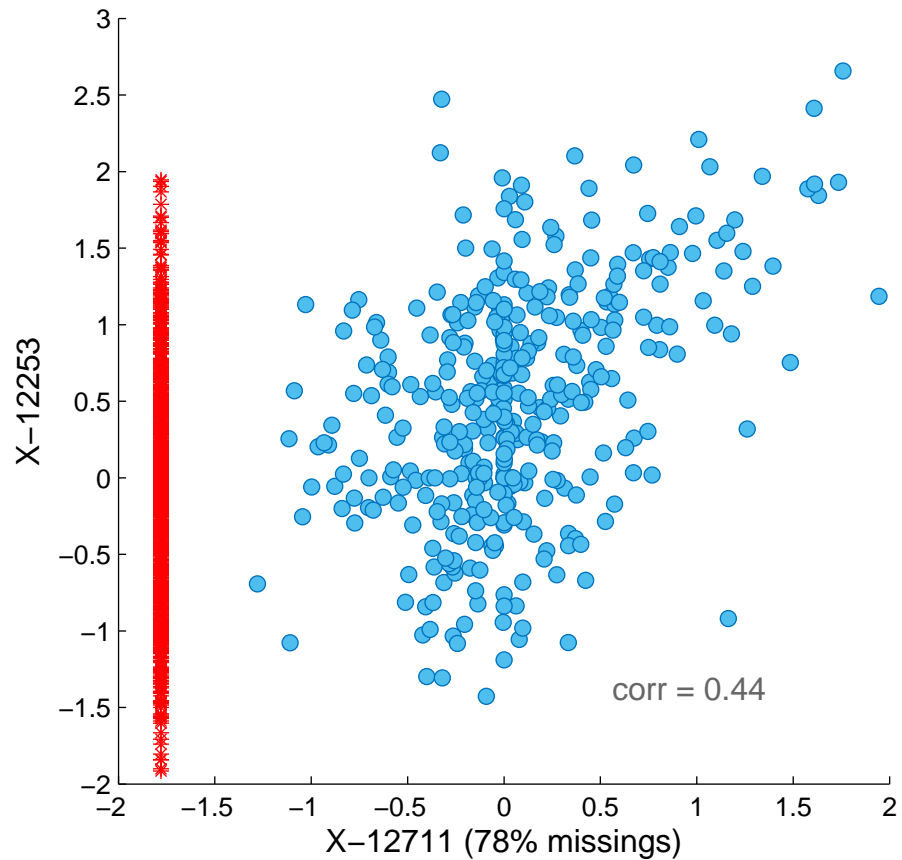

Concentrations of X-12253 in  
missing and observed X-12711

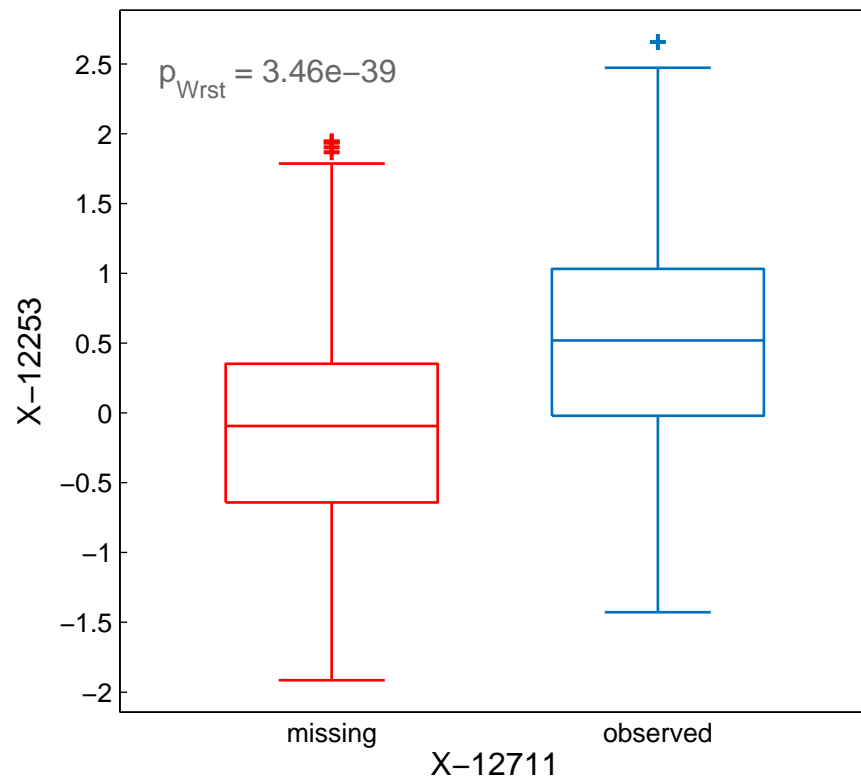

Missing values of X-12717  
in X-12704

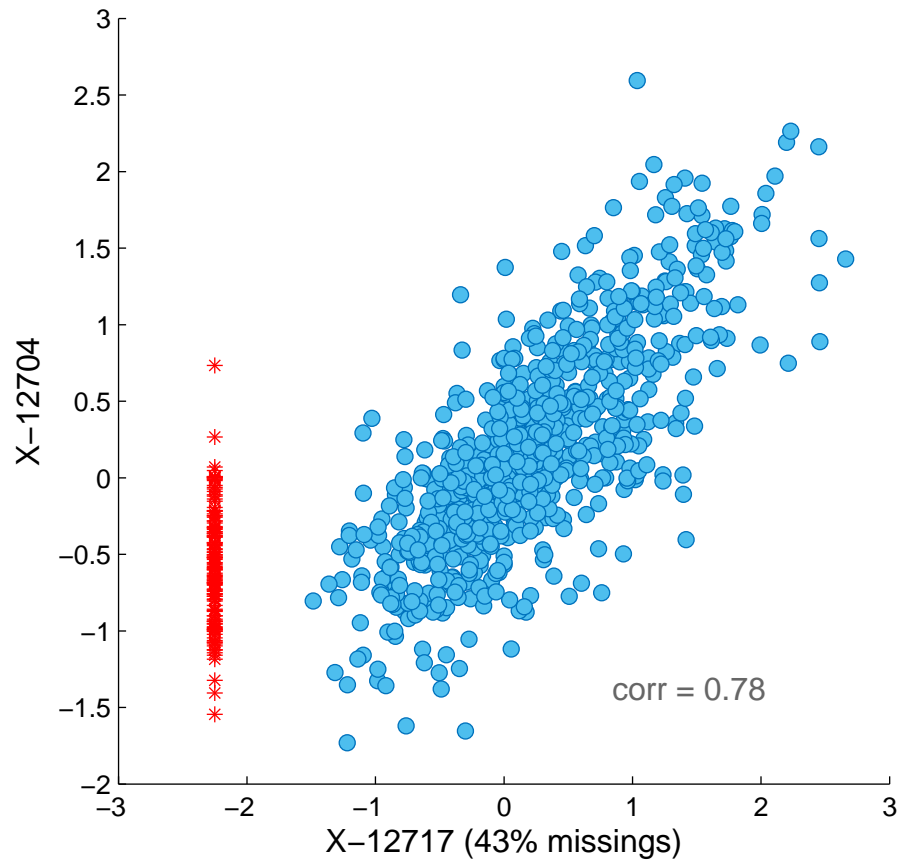

Concentrations of X-12704 in  
missing and observed X-12717

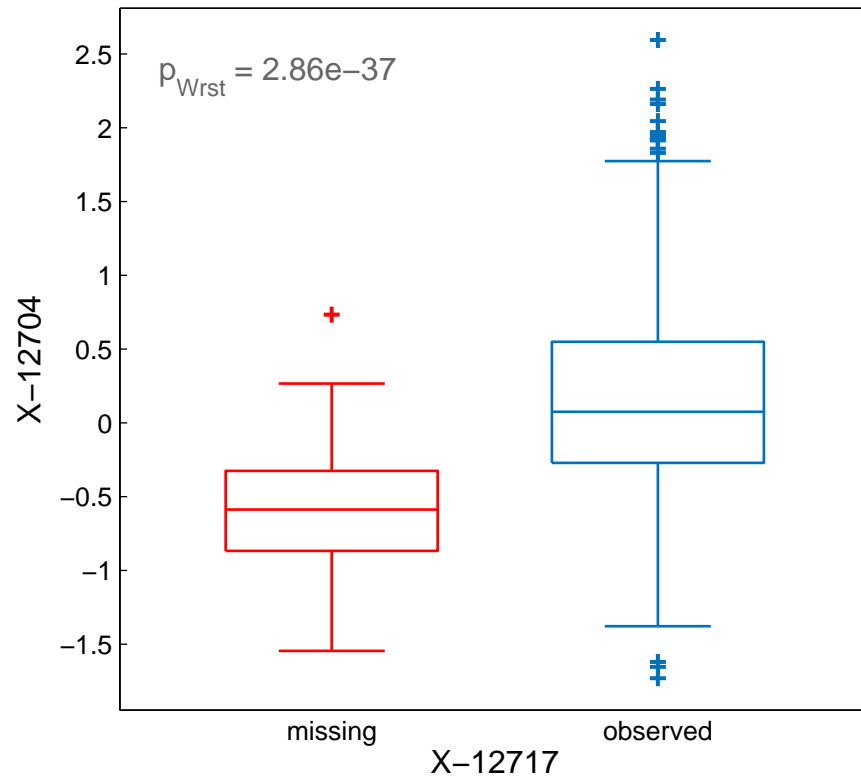

Missing values of X-12719  
in X-12717

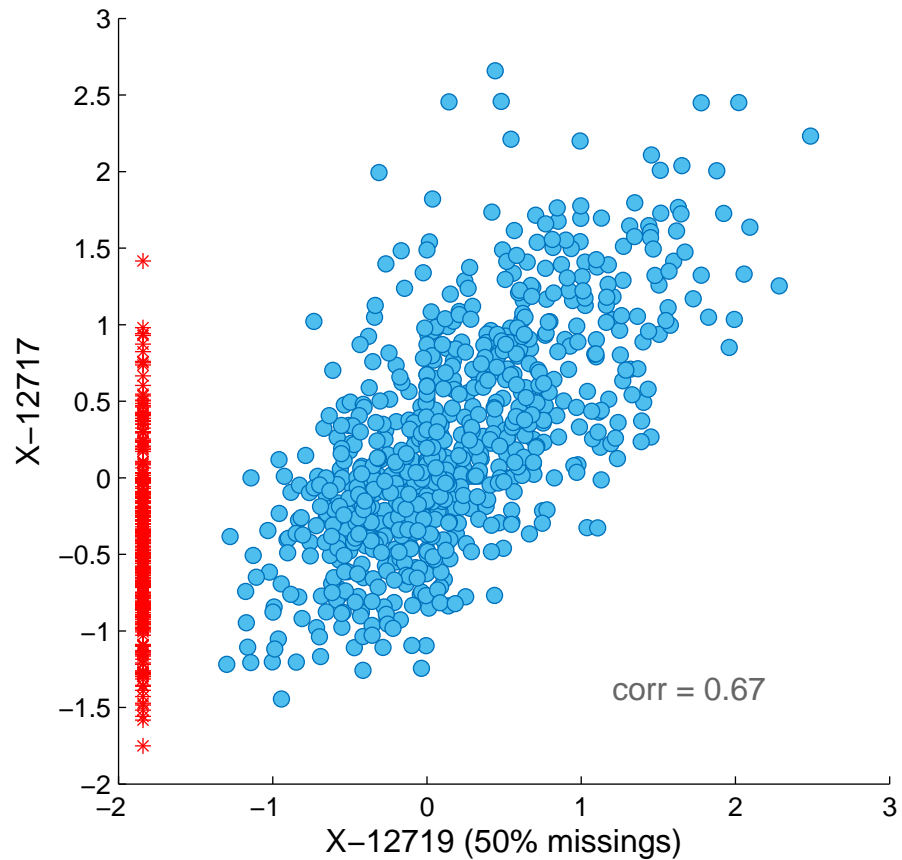

Concentrations of X-12717 in  
missing and observed X-12719

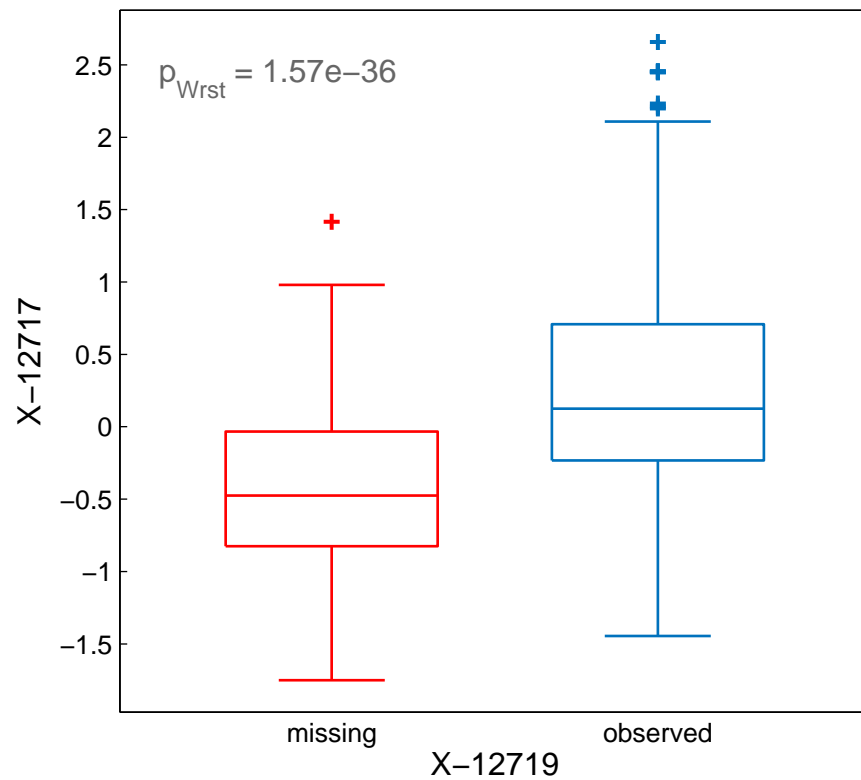

Missing values of X-12726  
in X-12728

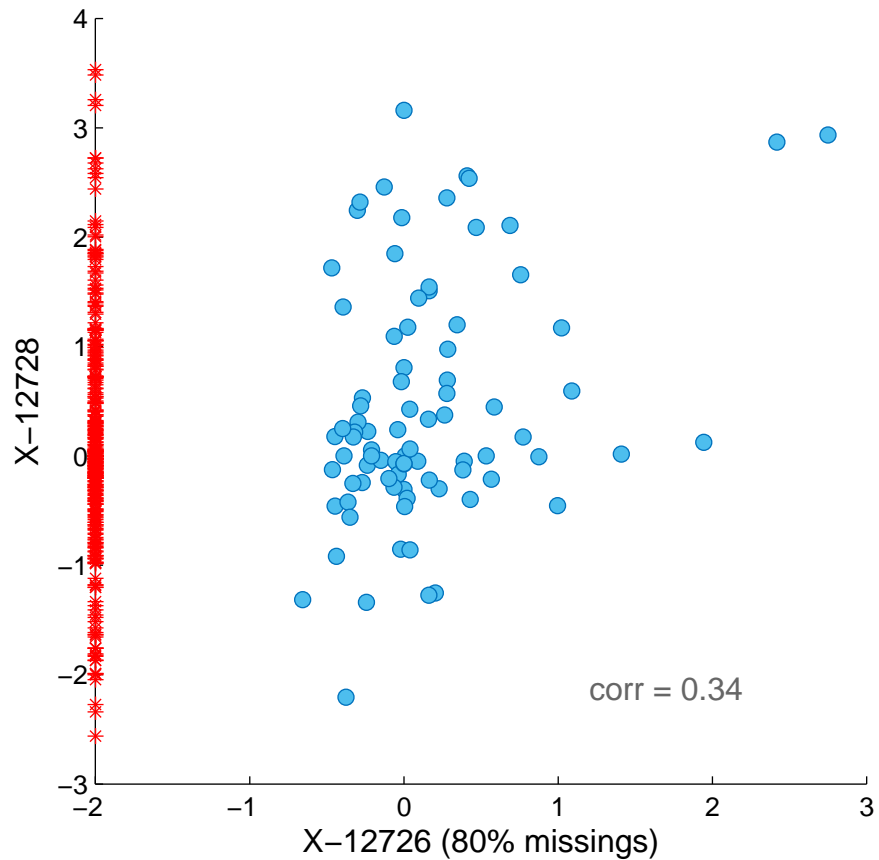

Concentrations of X-12728 in  
missing and observed X-12726

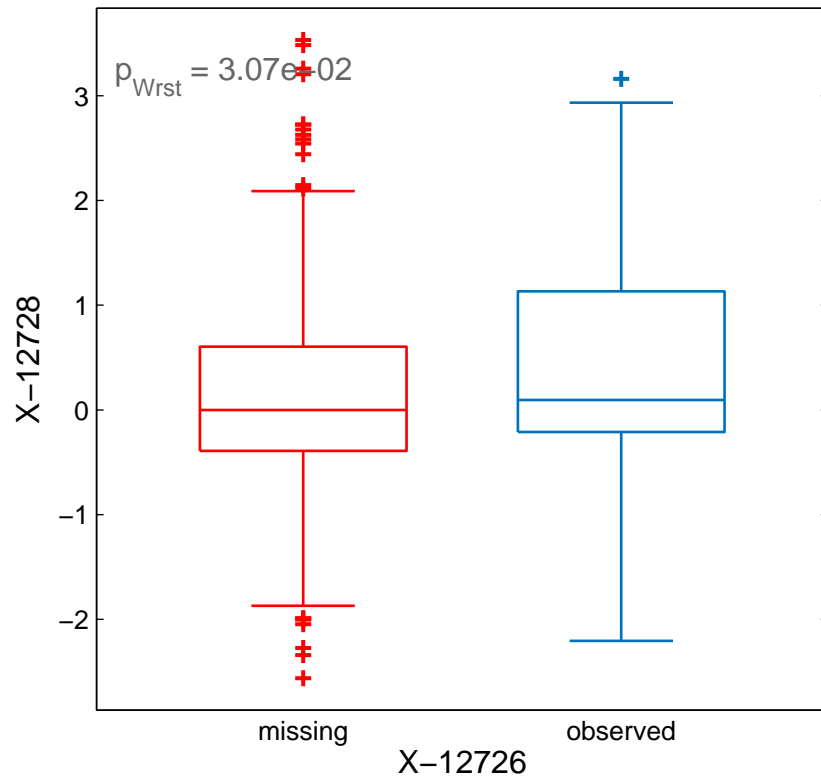

Missing values of X-12728  
in X-12007

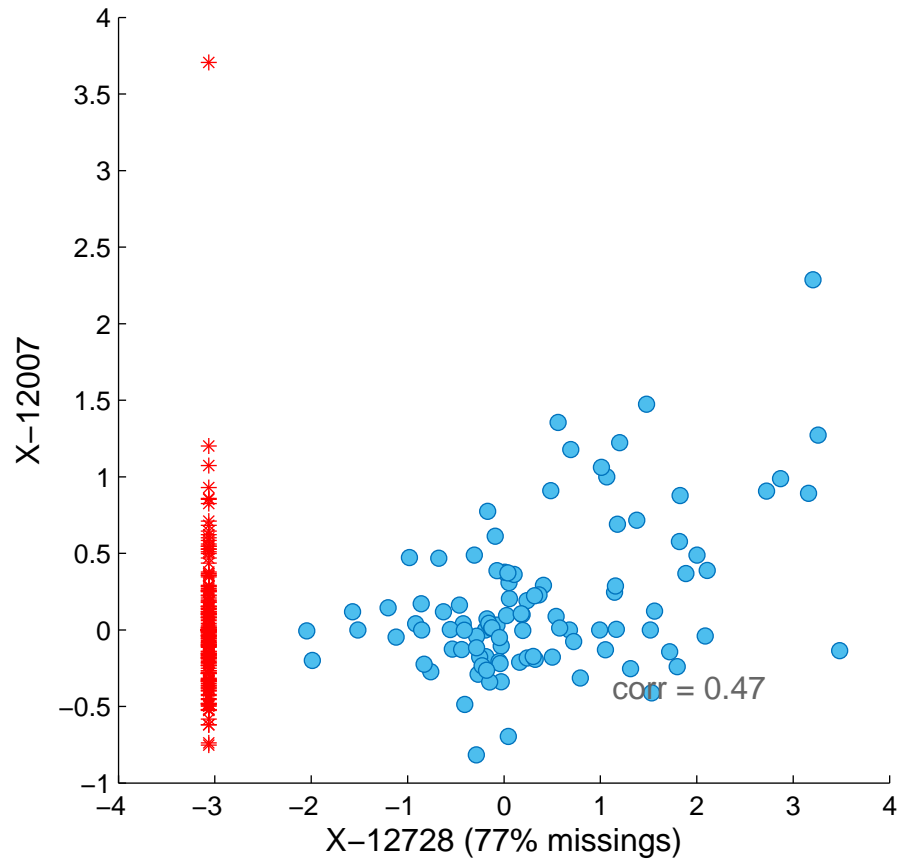

Concentrations of X-12007 in  
missing and observed X-12728

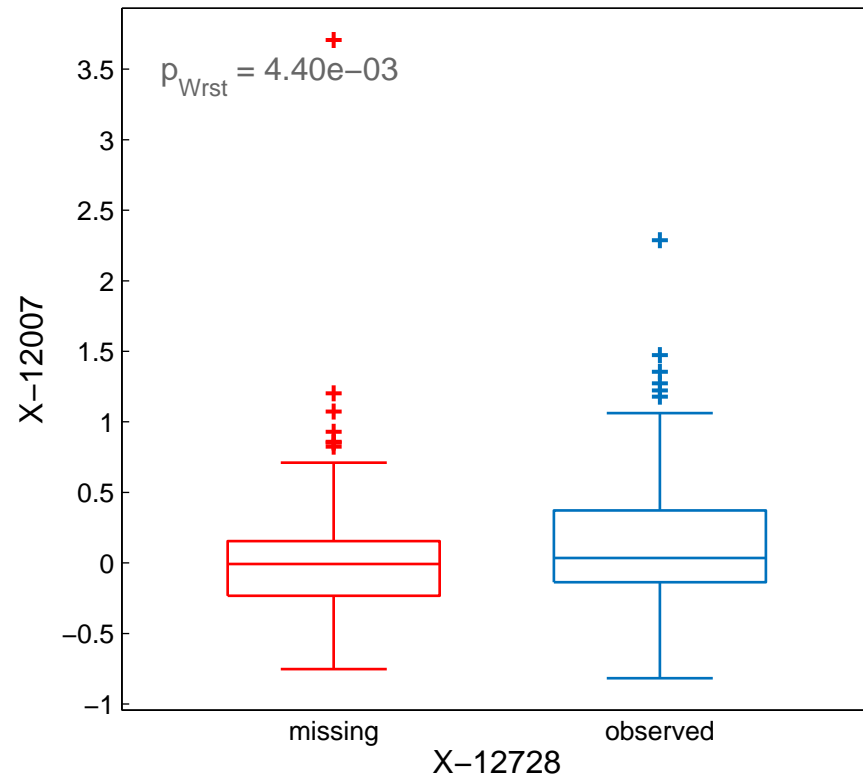

Missing values of X-12749  
in X-11423

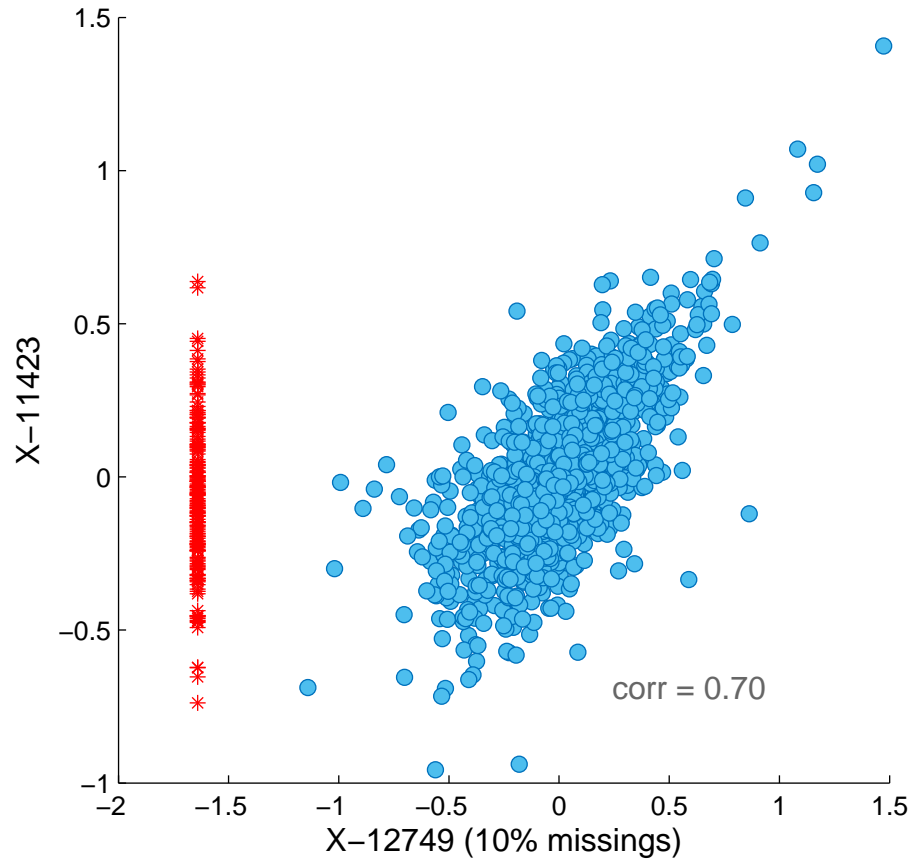

Concentrations of X-11423 in  
missing and observed X-12749

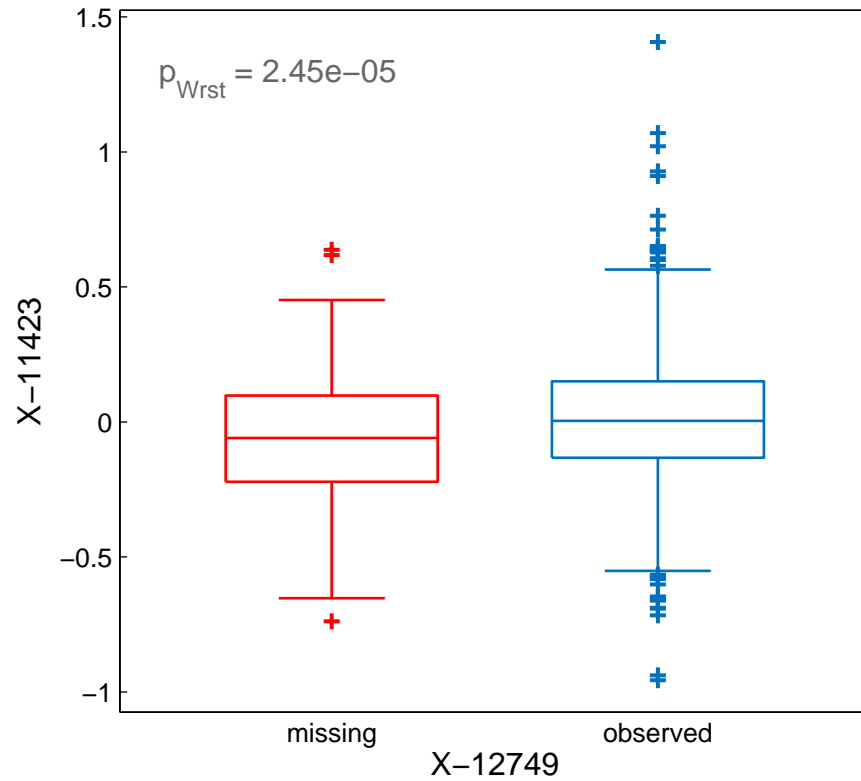

Missing values of X-12771  
in X-04357

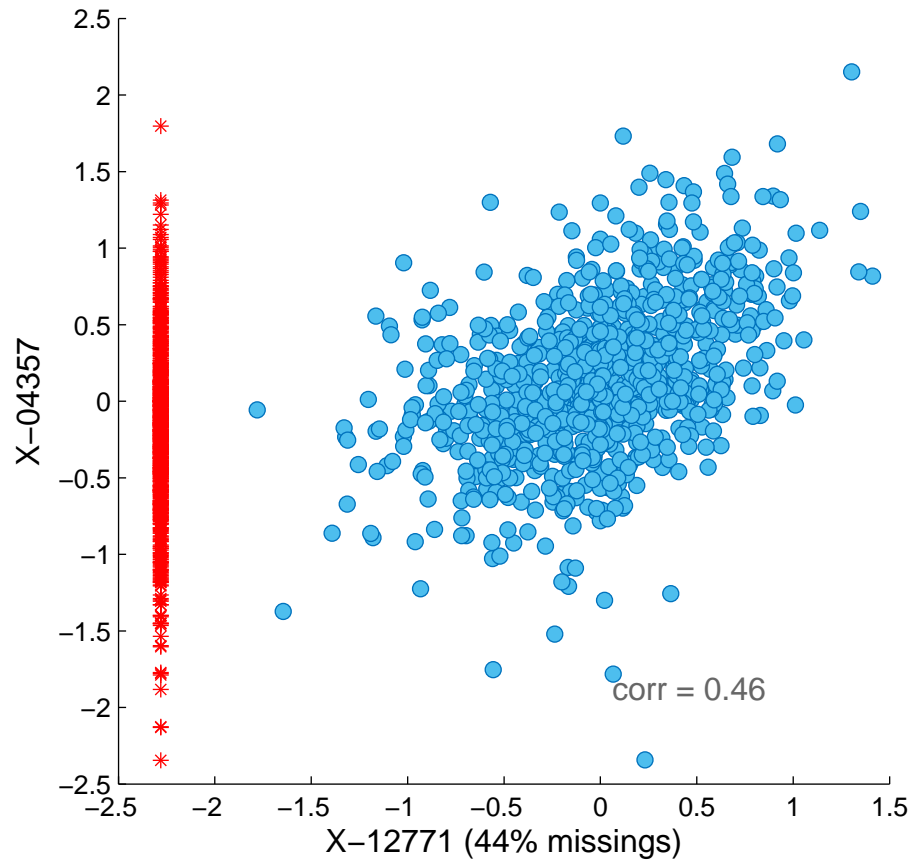

Concentrations of X-04357 in  
missing and observed X-12771

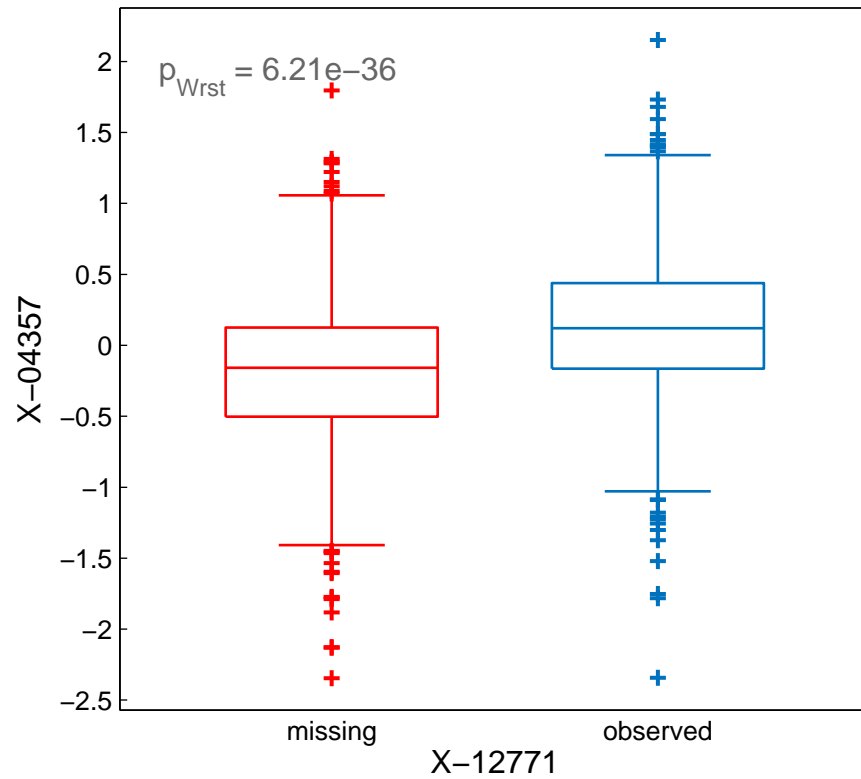

Missing values of X-12786  
in X-04357

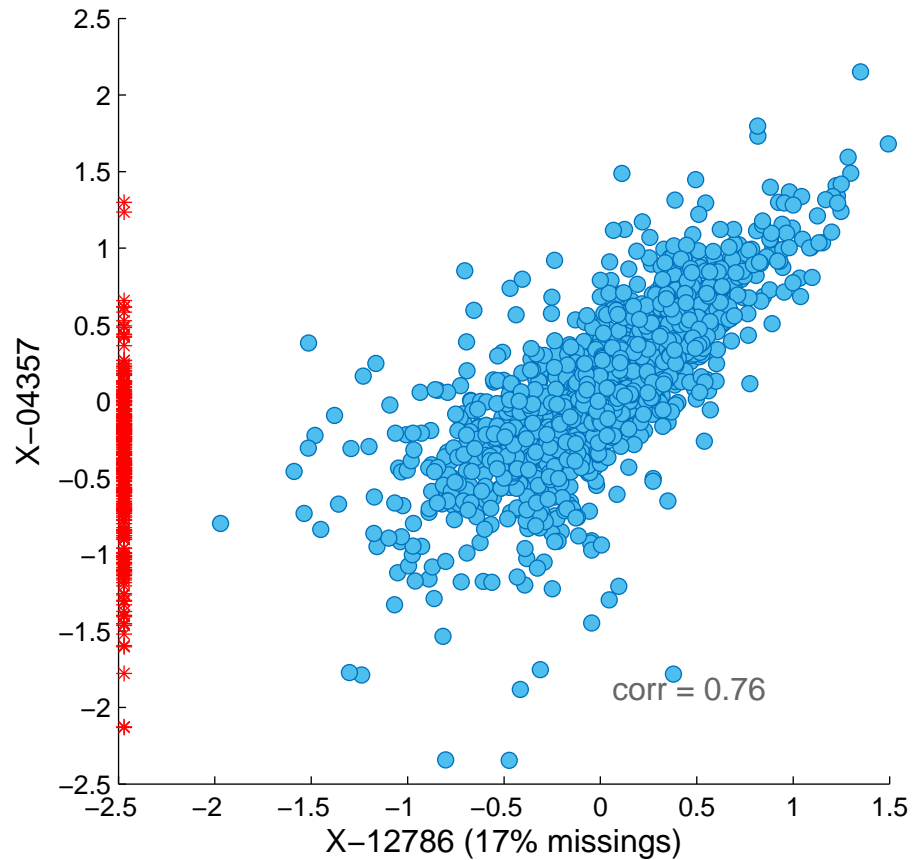

Concentrations of X-04357 in  
missing and observed X-12786

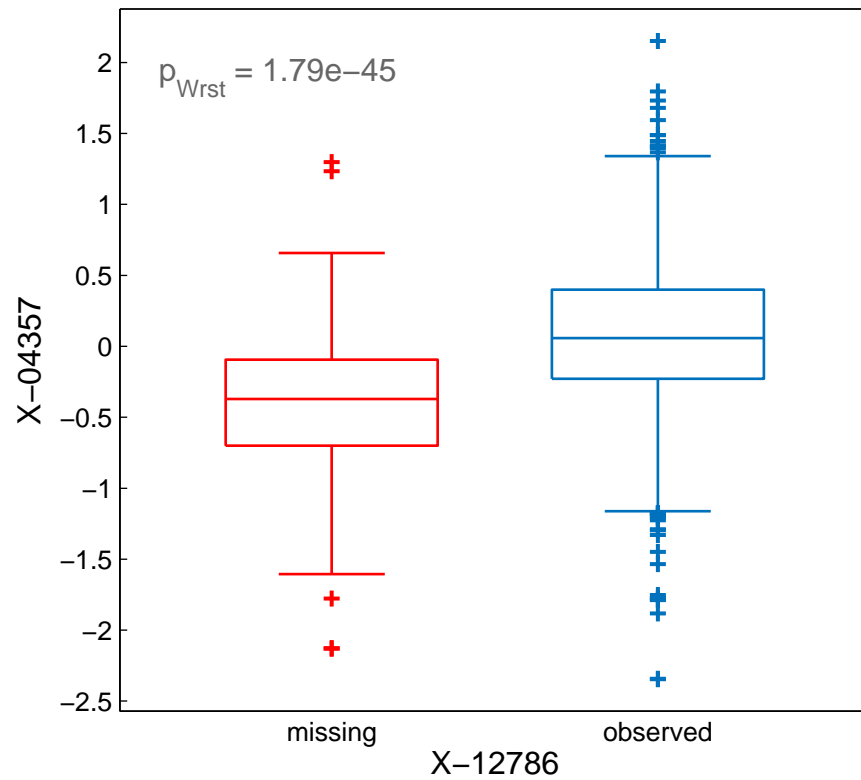



Missing values of X-12798  
in 3-dehydrocarnitine

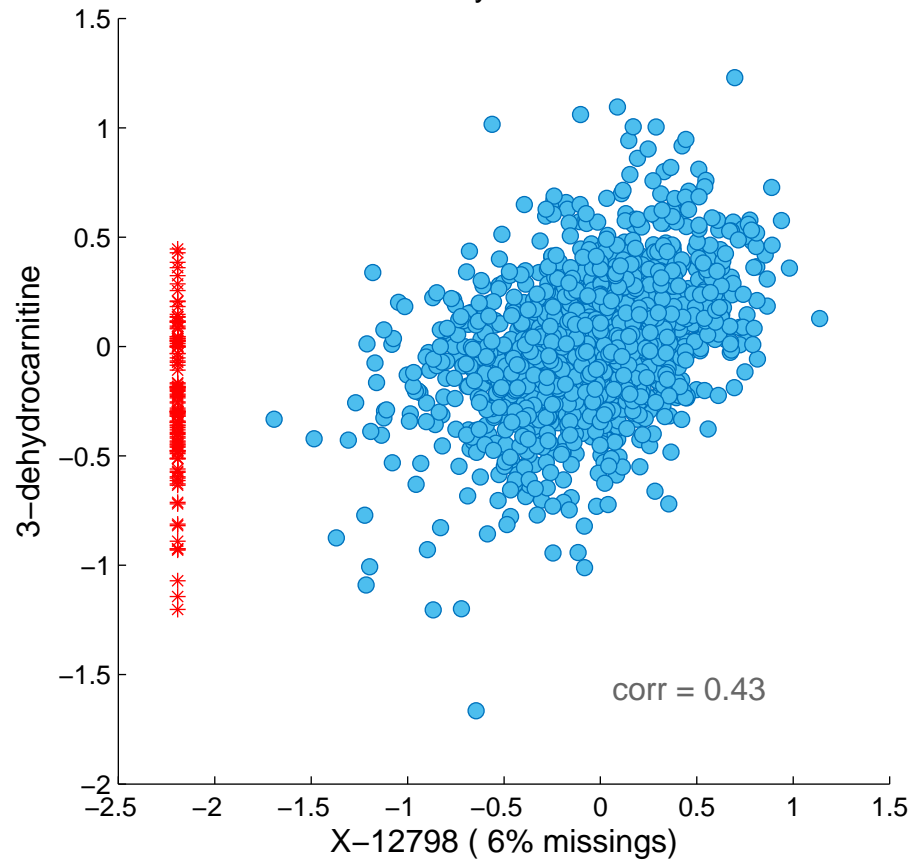

Concentrations of 3-dehydrocarnitine in  
missing and observed X-12798

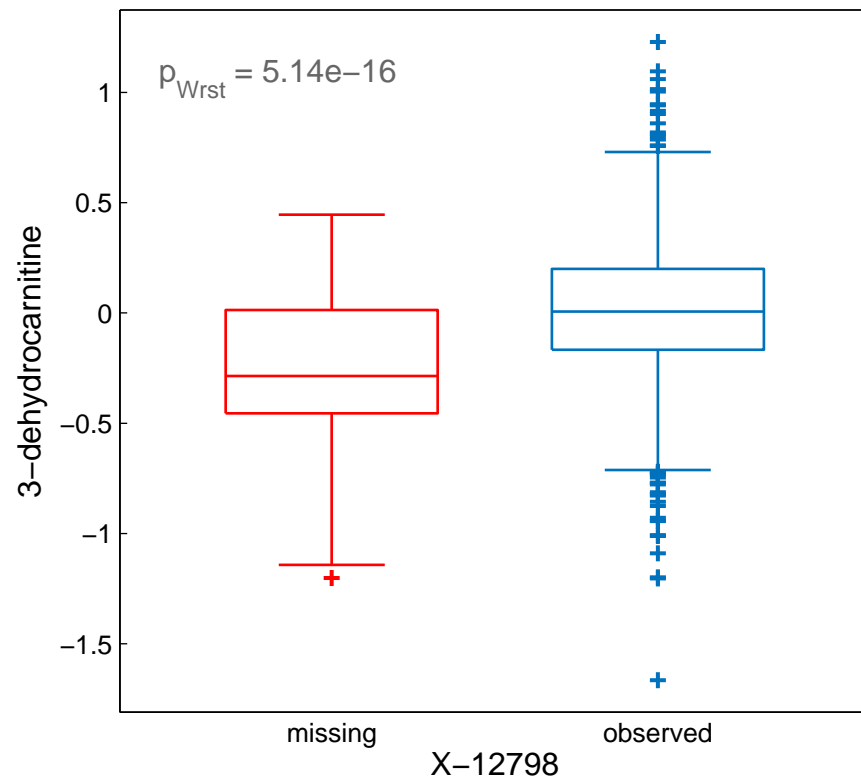

Missing values of X-12816  
in trigonelline (N'-methylnicotinate)

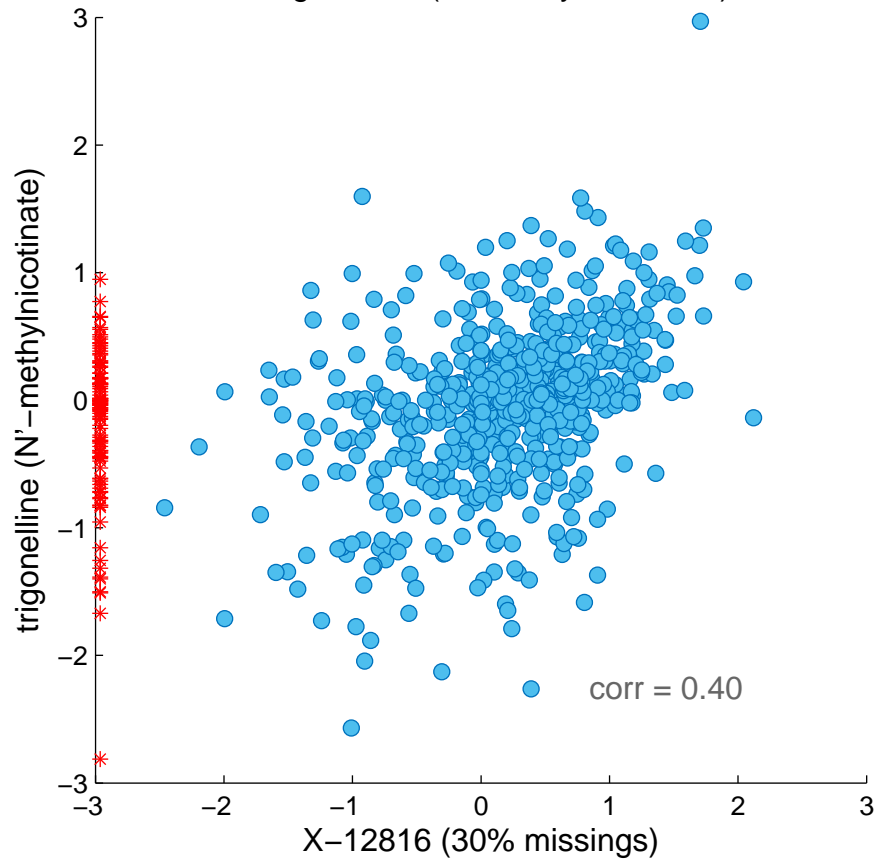

Concentrations of trigonelline (N'-methylnicotinate) in  
missing and observed X-12816

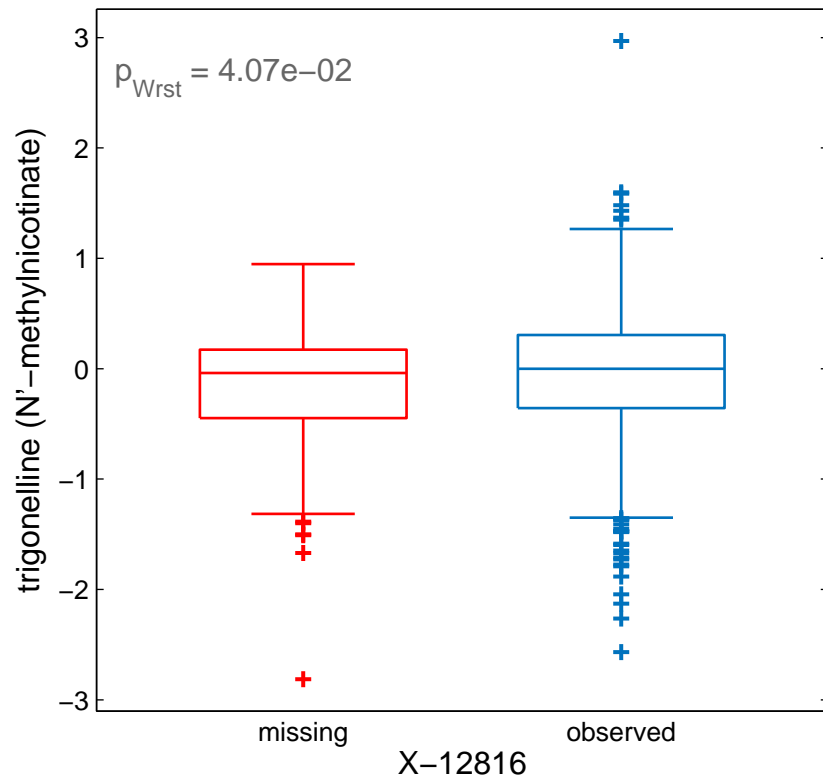

Missing values of X-12830  
in X-11452

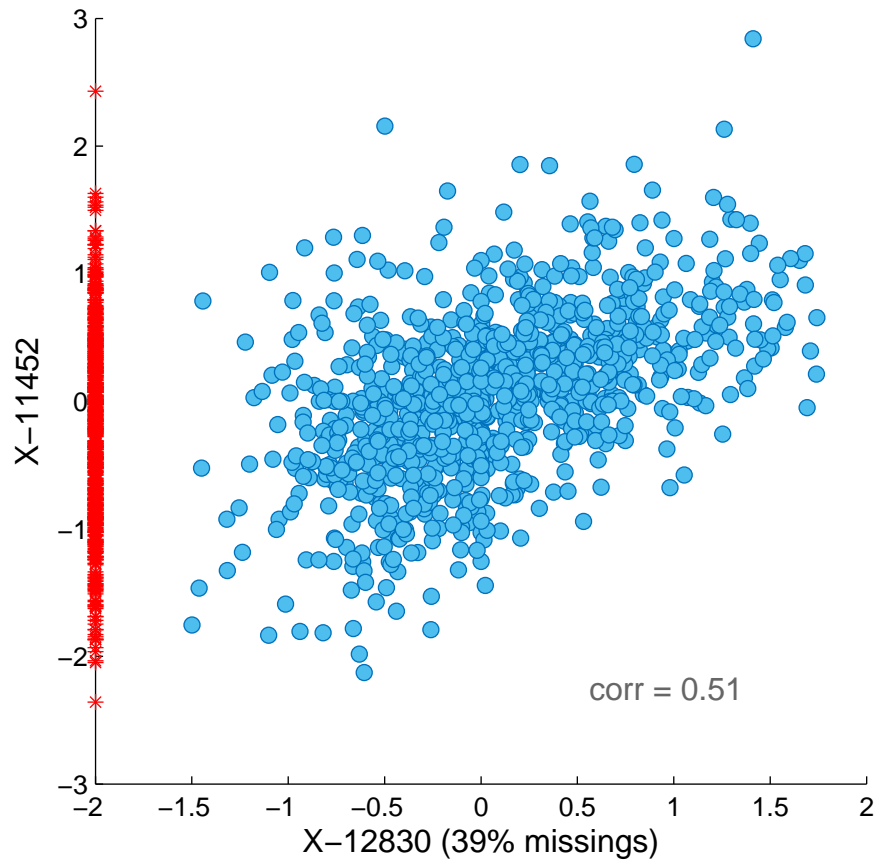

Concentrations of X-11452 in  
missing and observed X-12830

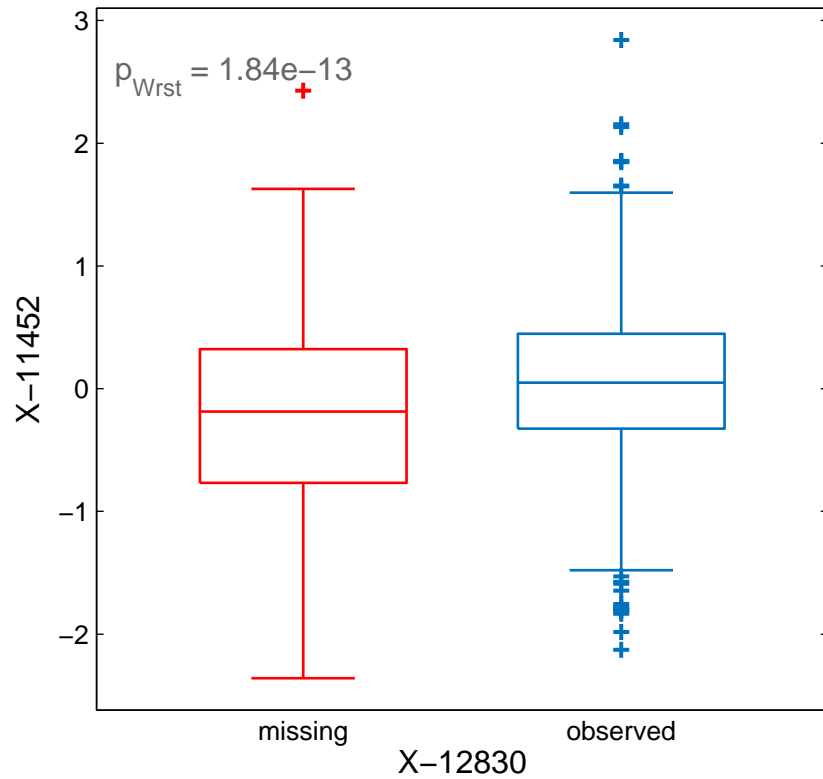

Missing values of X-12844  
in X-11444

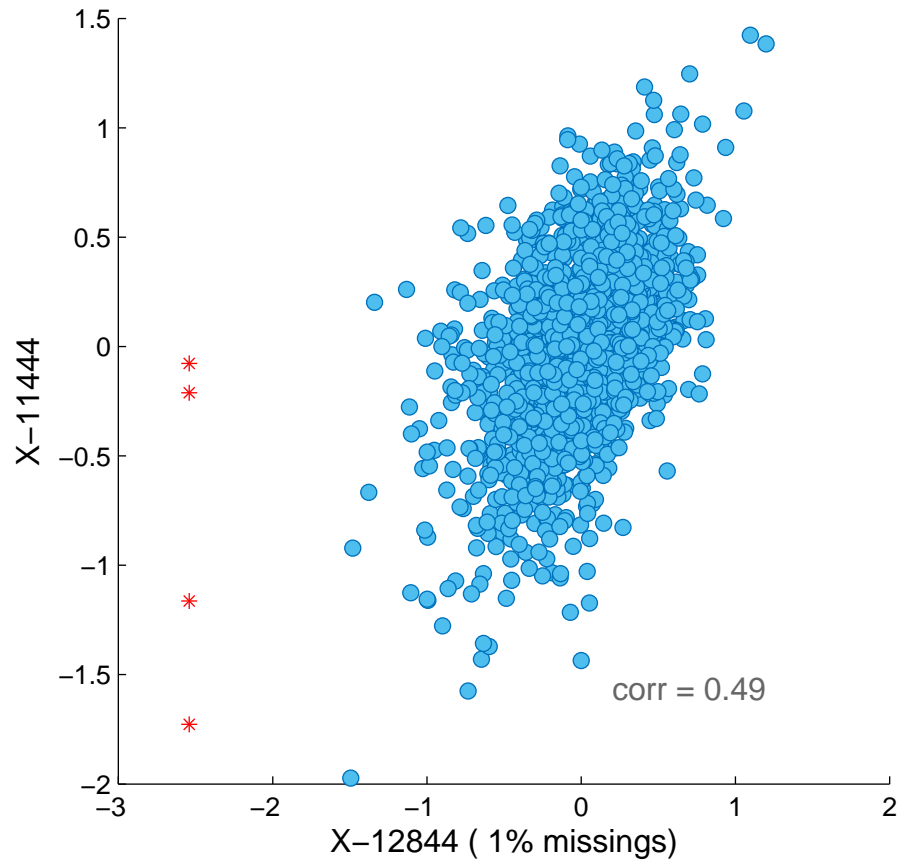

Concentrations of X-11444 in  
missing and observed X-12844

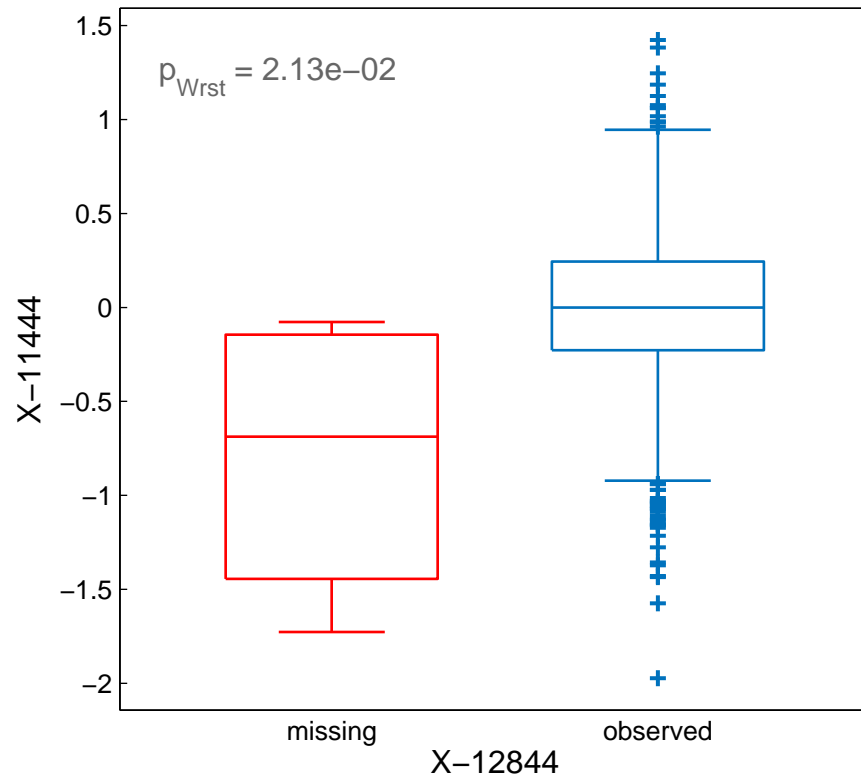

Missing values of 2-tetradecenoyl carnitine  
in laurylcarnitine

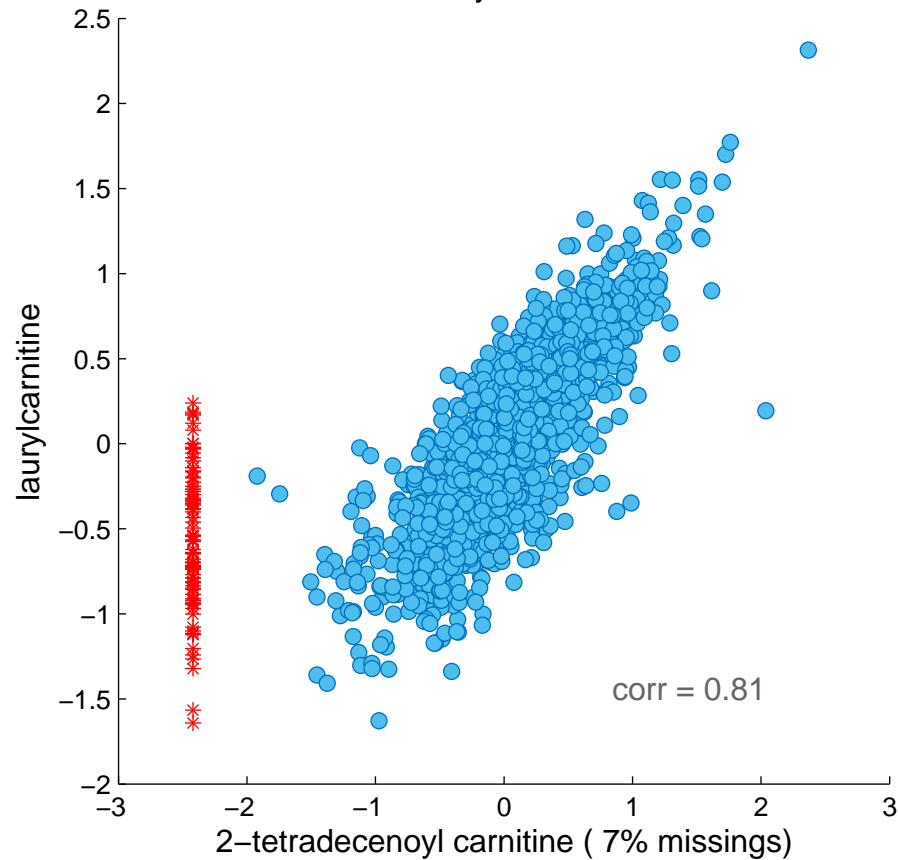

Concentrations of laurylcarnitine in  
missing and observed 2-tetradecenoyl carnitine

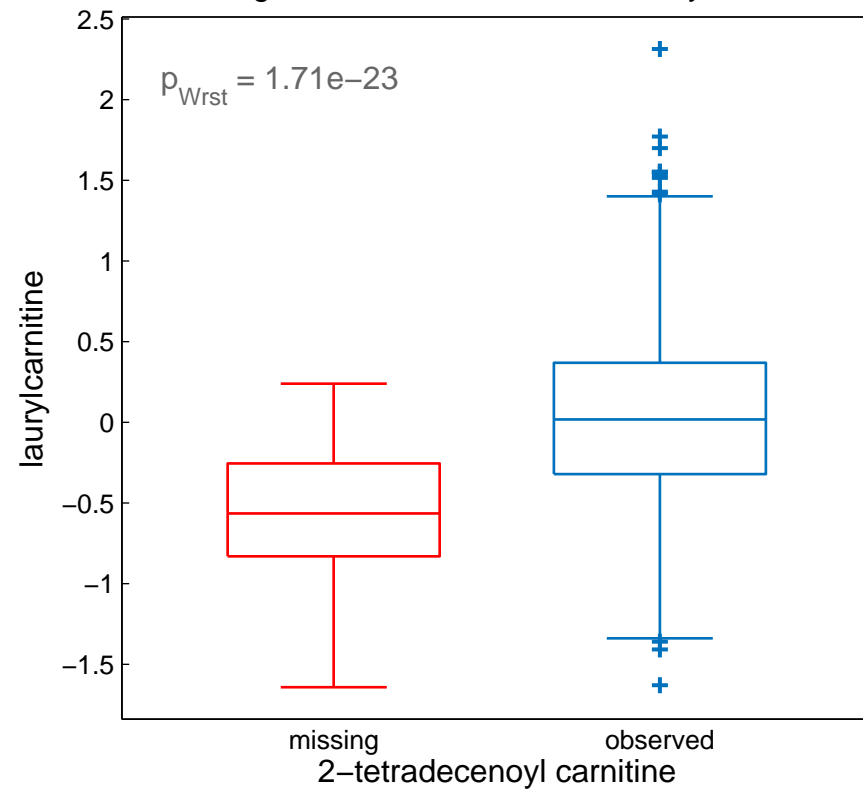

Missing values of X-12847  
in thymol sulfate

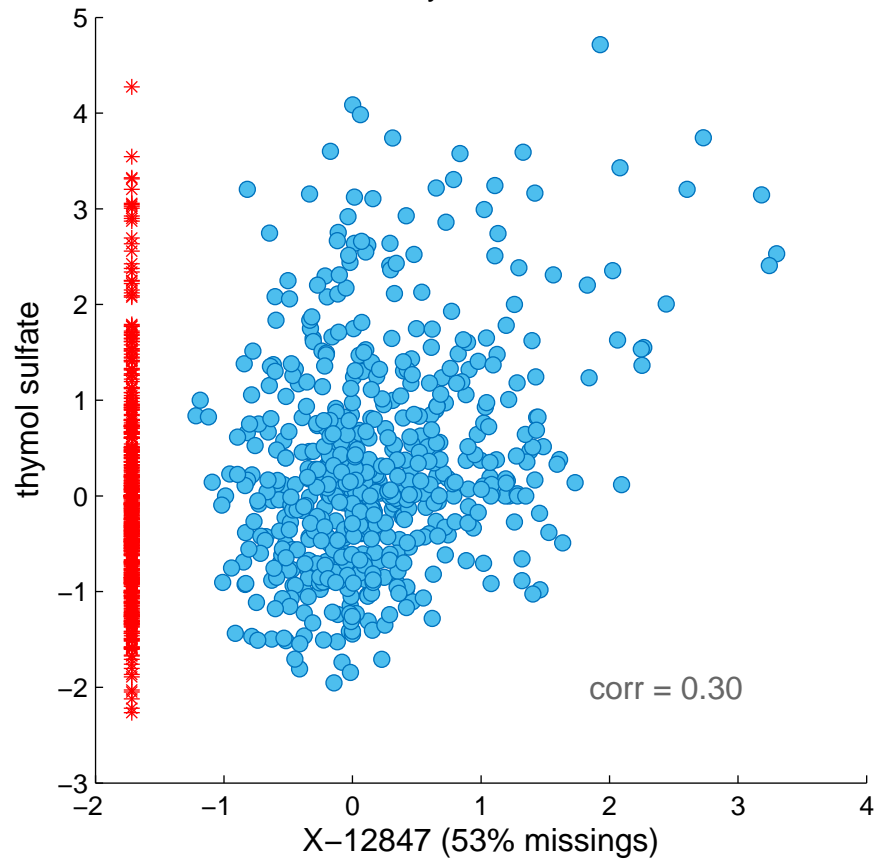

Concentrations of thymol sulfate in  
missing and observed X-12847

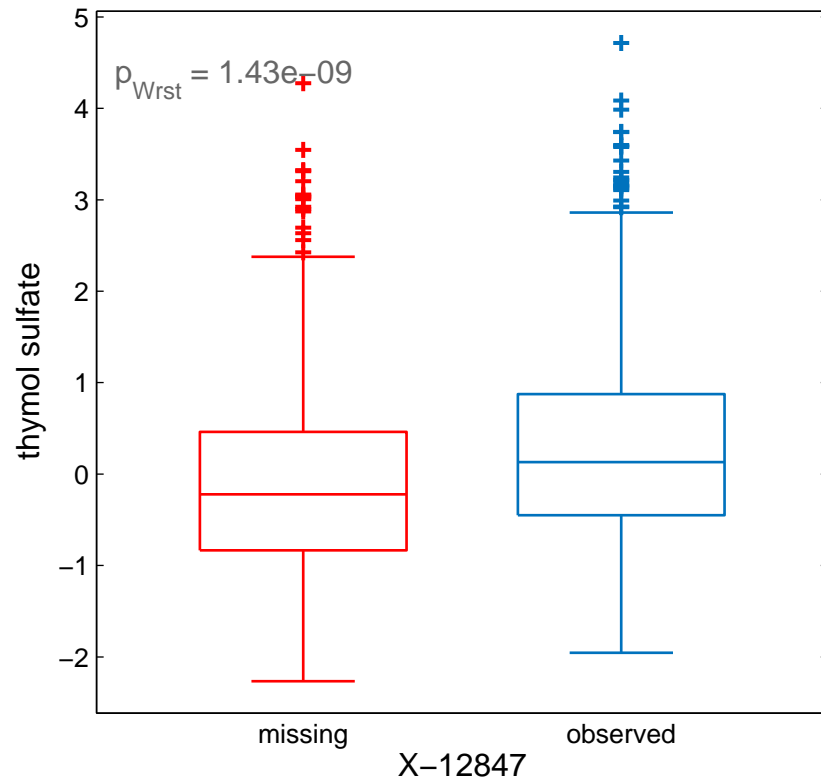

Missing values of X-12850  
in X-14658

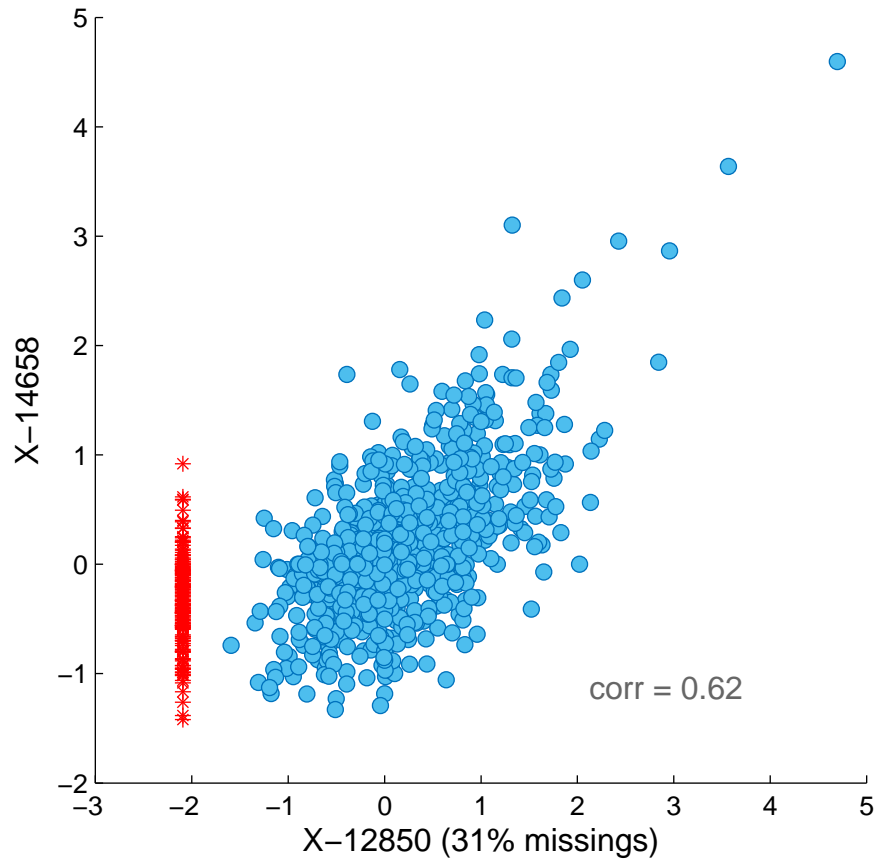

Concentrations of X-14658 in  
missing and observed X-12850

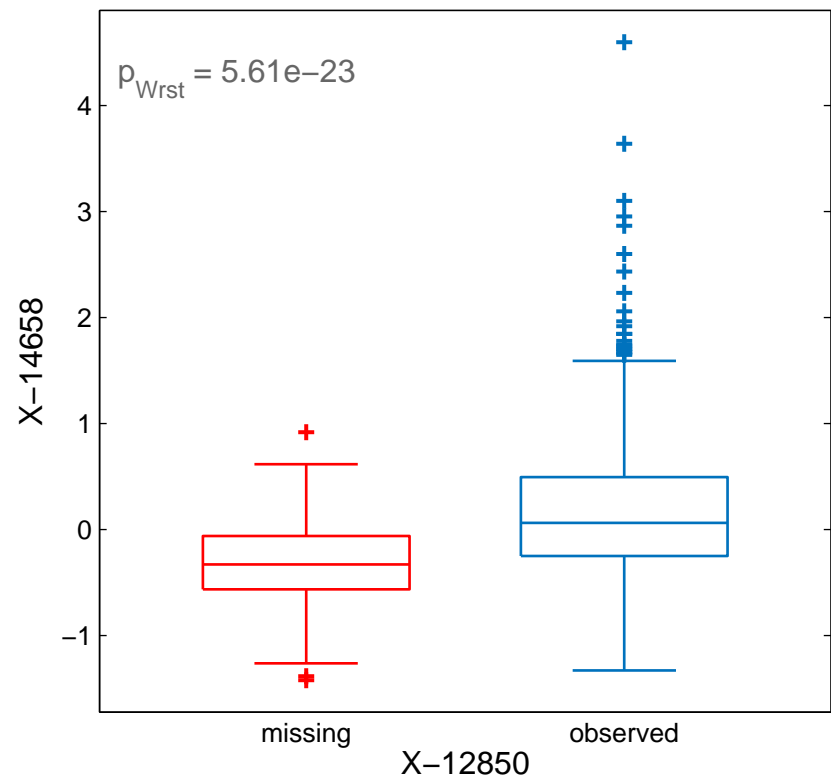

Missing values of X-12855  
in X-12465

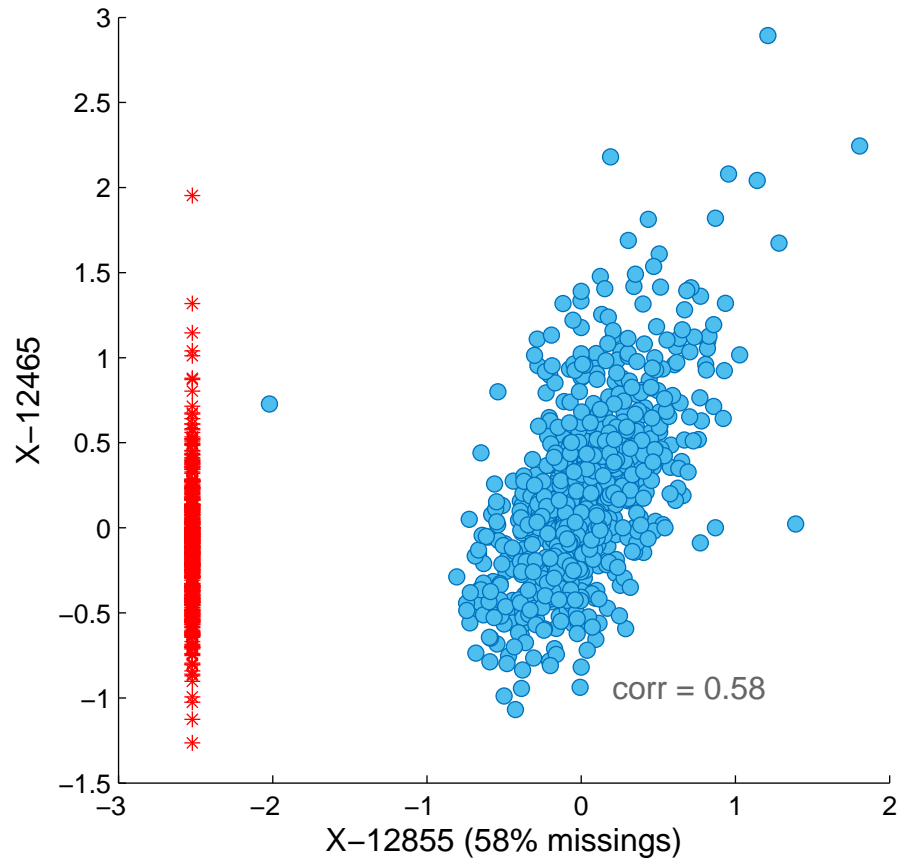

Concentrations of X-12465 in  
missing and observed X-12855

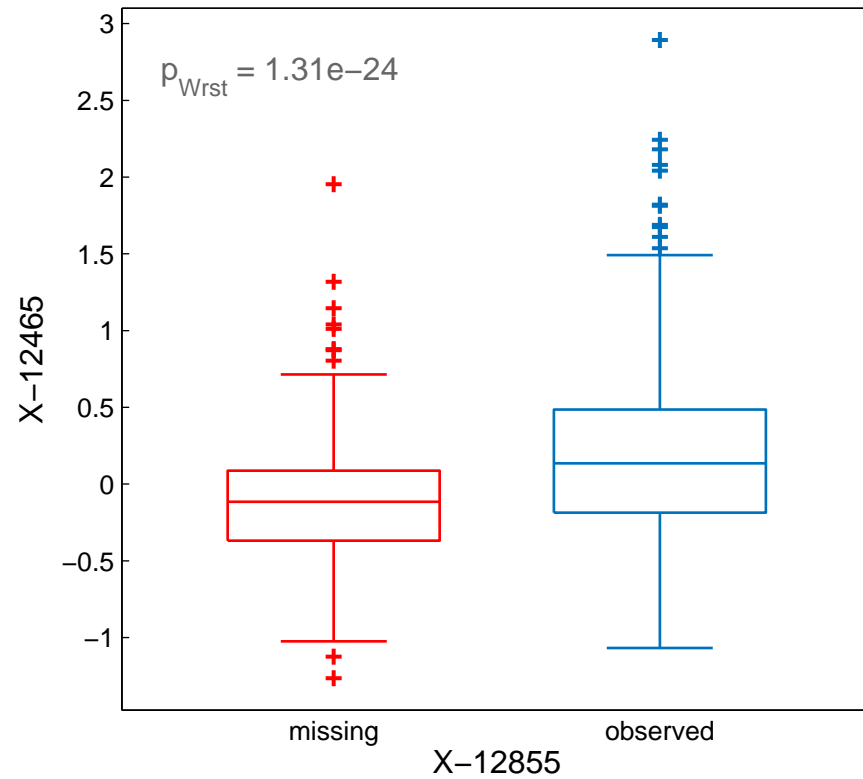



Missing values of X-12990  
in dihomolinenate (20:3n3 or n6)

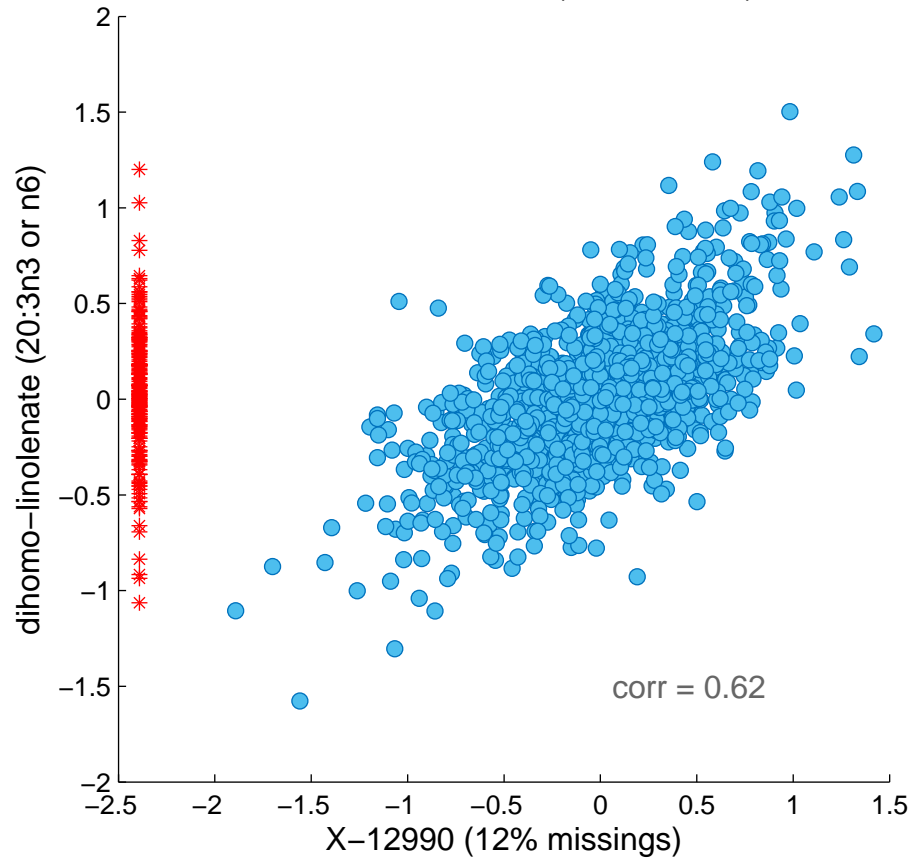

Concentrations of dihomolinenate (20:3n3 or n6)  
in missing and observed X-12990

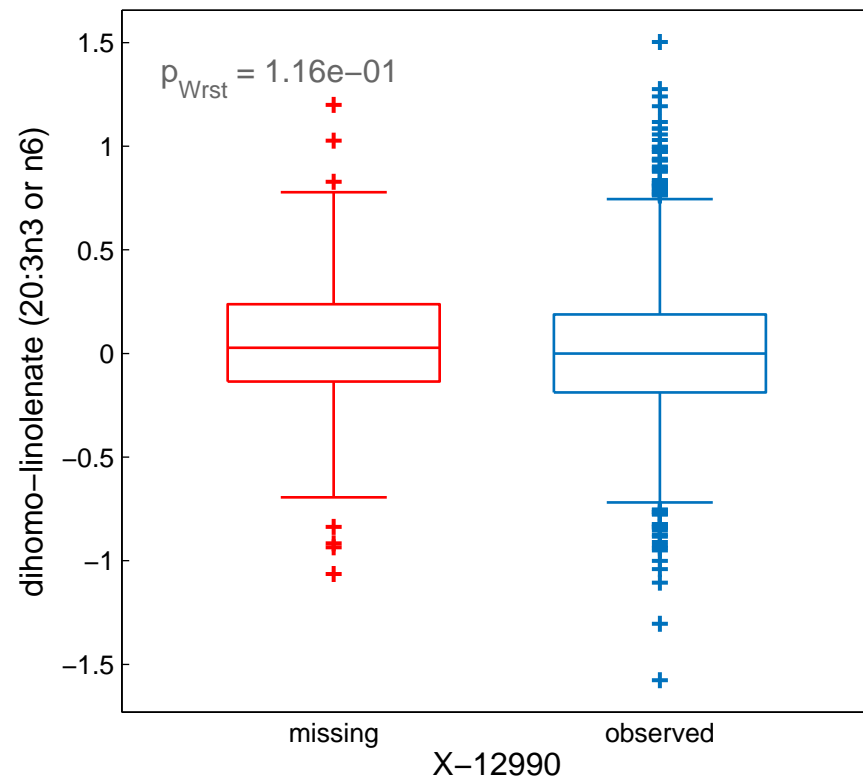

Missing values of X-13069  
in X-12442

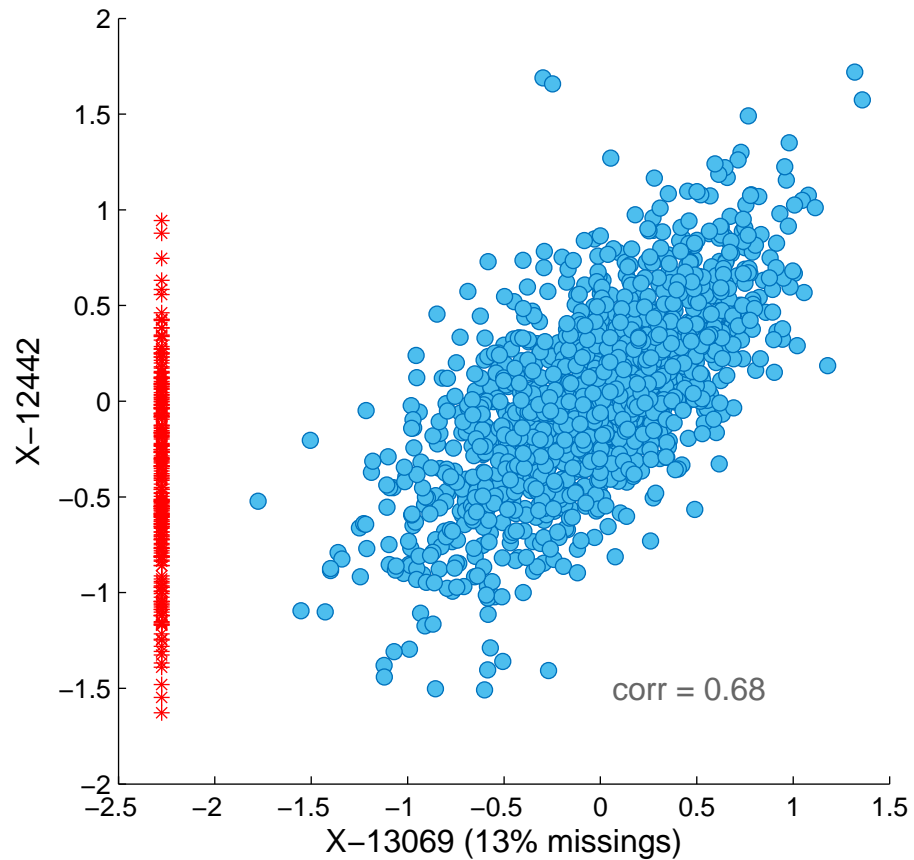

Concentrations of X-12442 in  
missing and observed X-13069

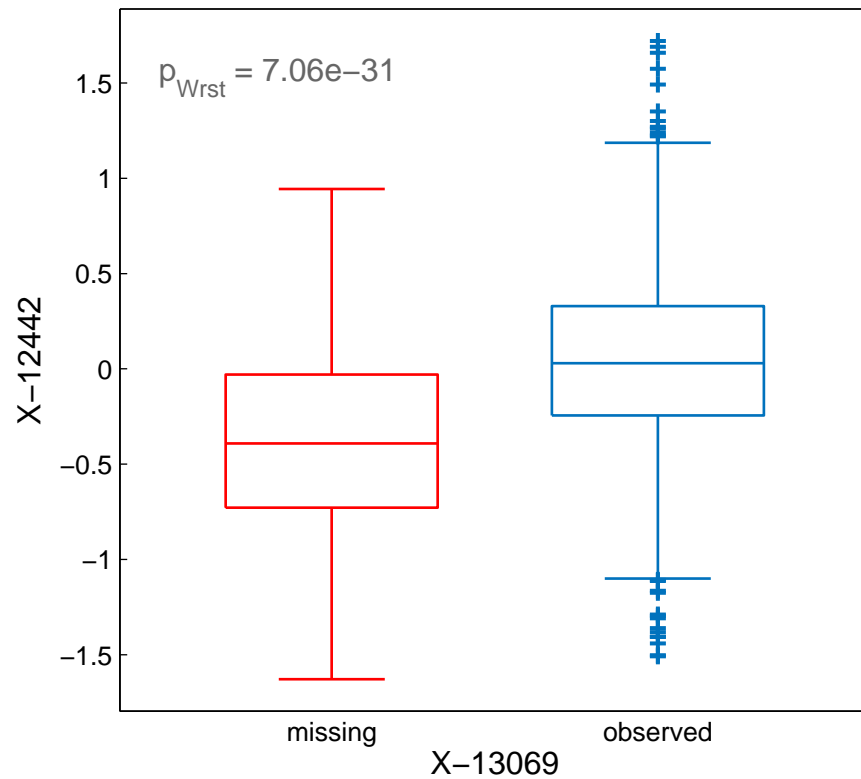

Missing values of stearamide  
in oleamide

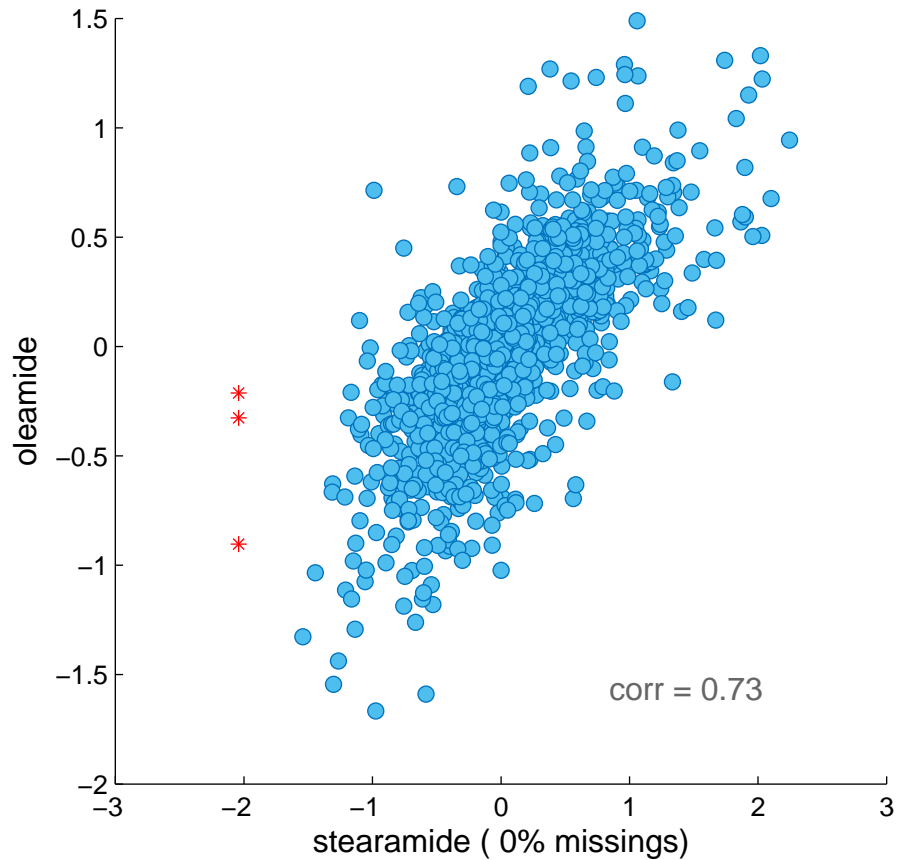

Concentrations of oleamide in  
missing and observed stearamide

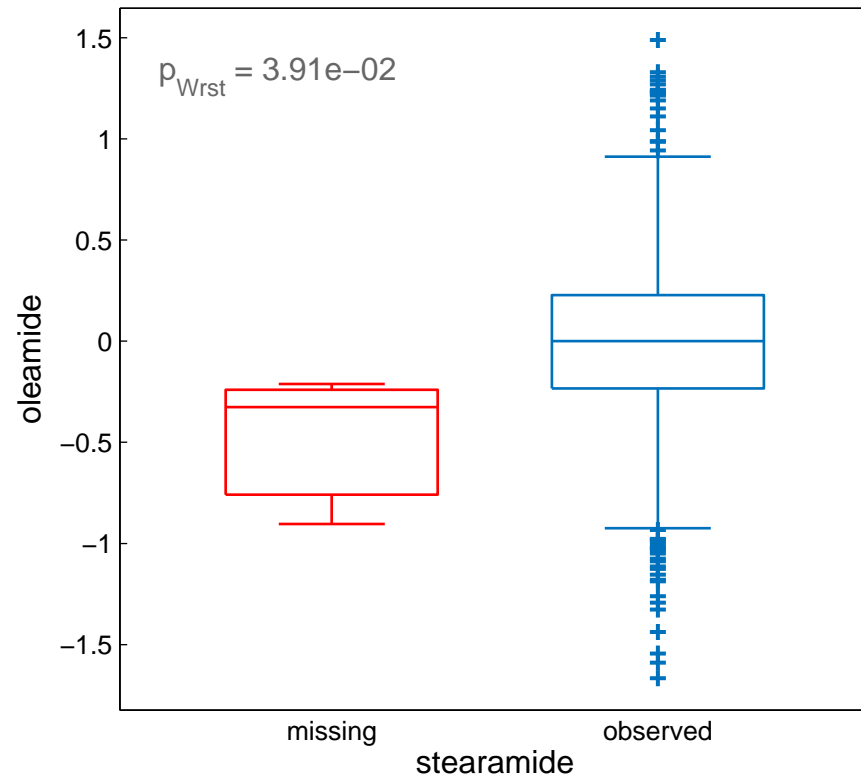

Missing values of X-13215  
in X-11317

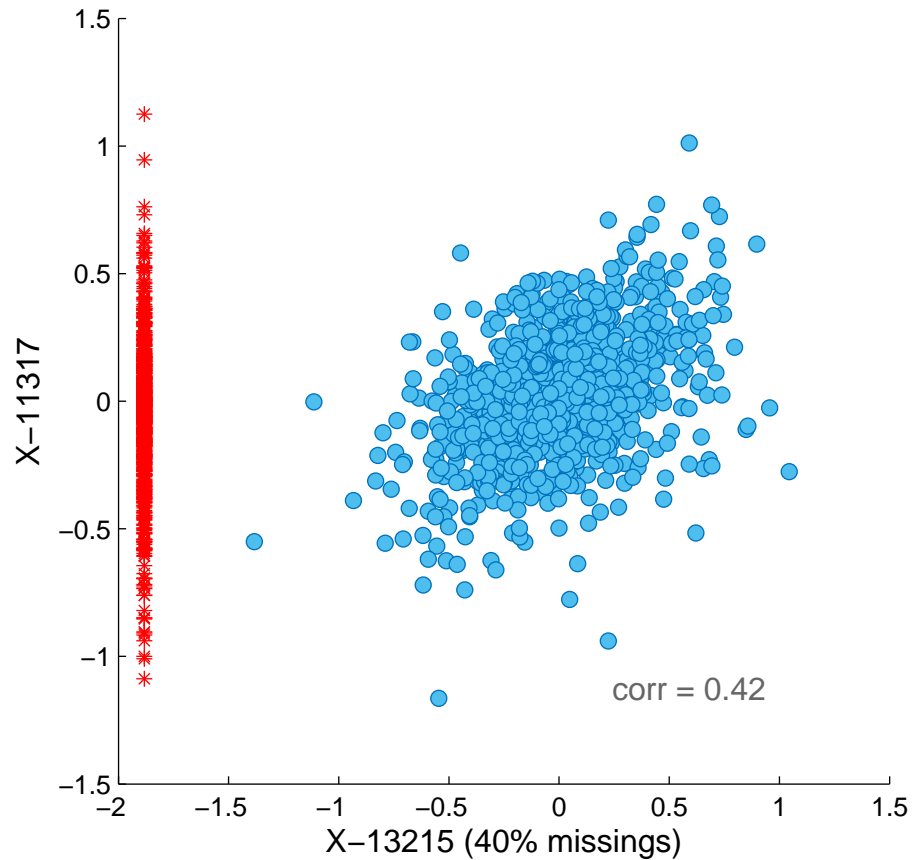

Concentrations of X-11317 in  
missing and observed X-13215

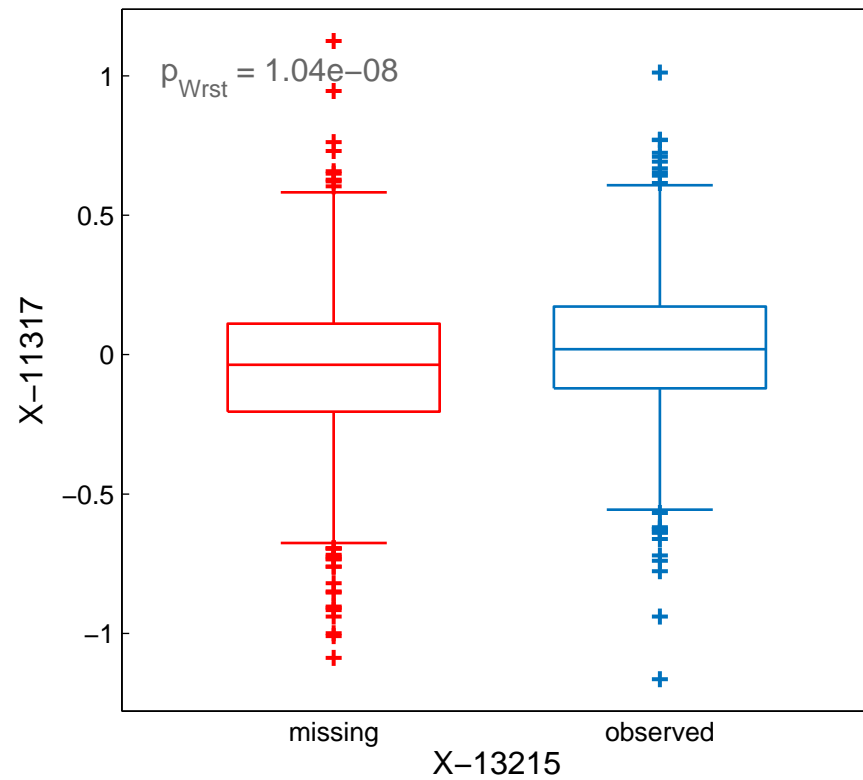

Missing values of X-13429  
in X-14626

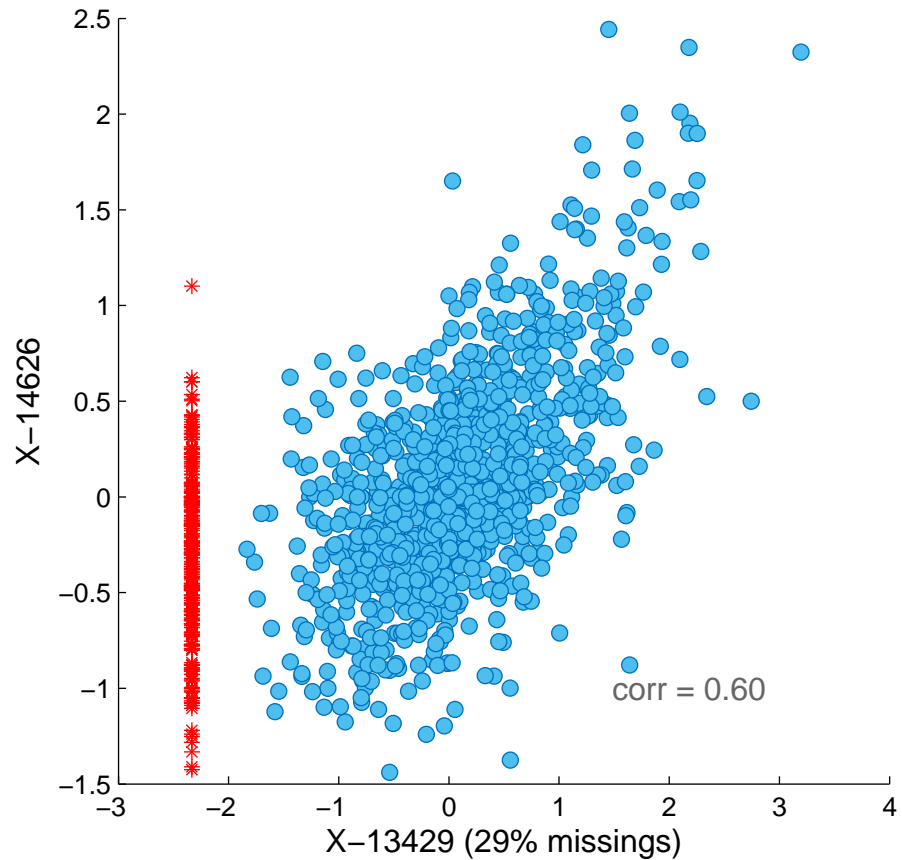

Concentrations of X-14626 in  
missing and observed X-13429

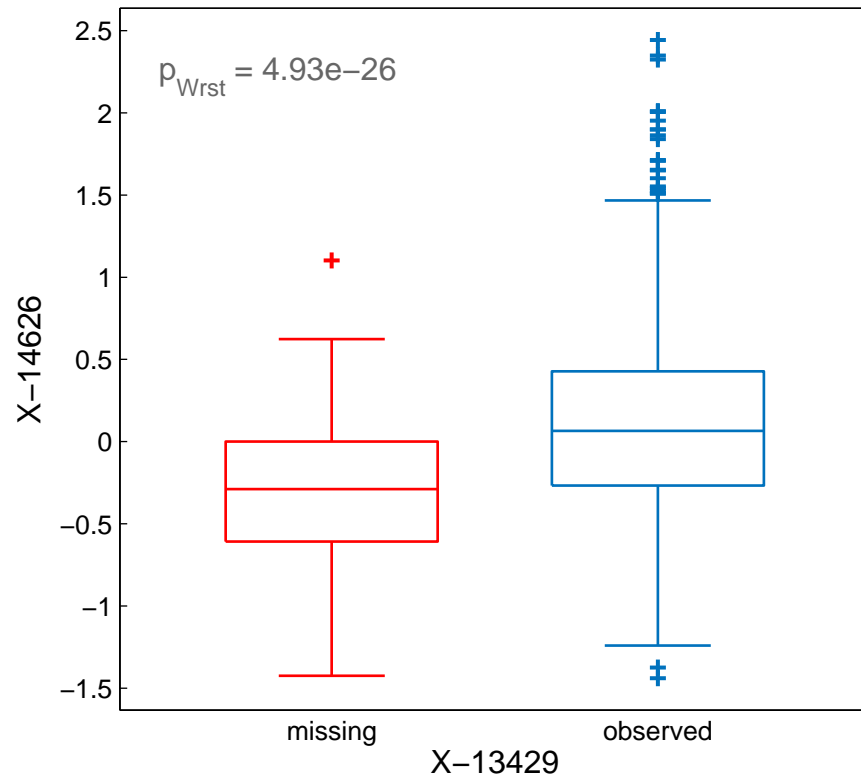

Missing values of 3-(3-hydroxyphenyl)propionate  
in X-12236

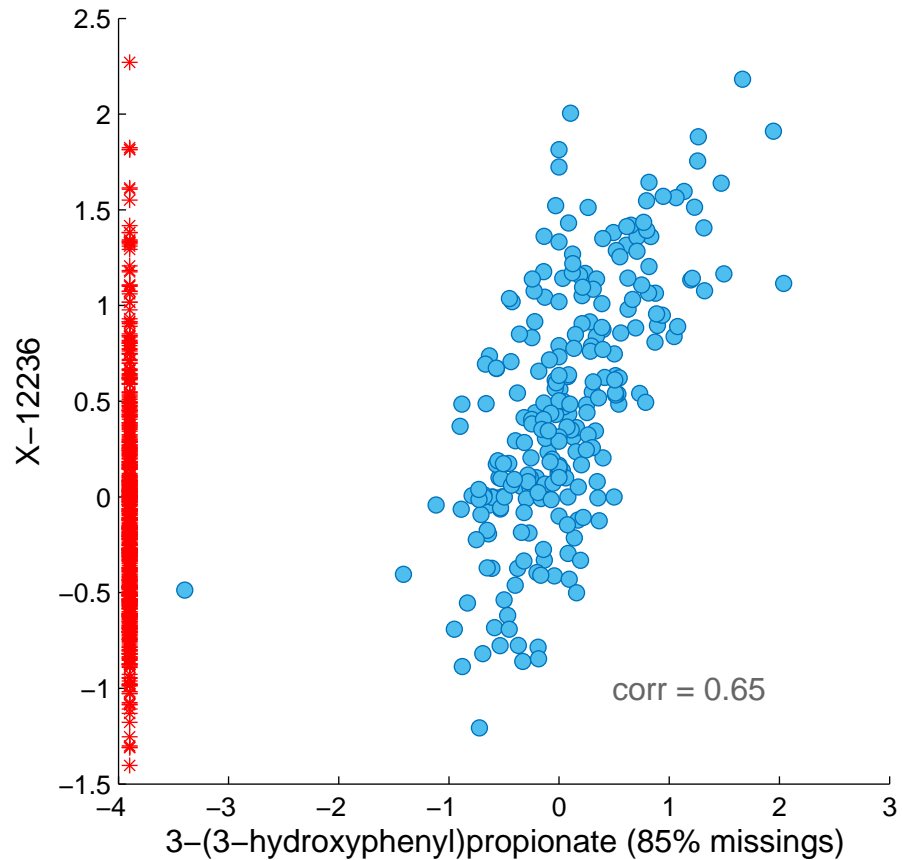

Concentrations of X-12236 in  
missing and observed 3-(3-hydroxyphenyl)propionate

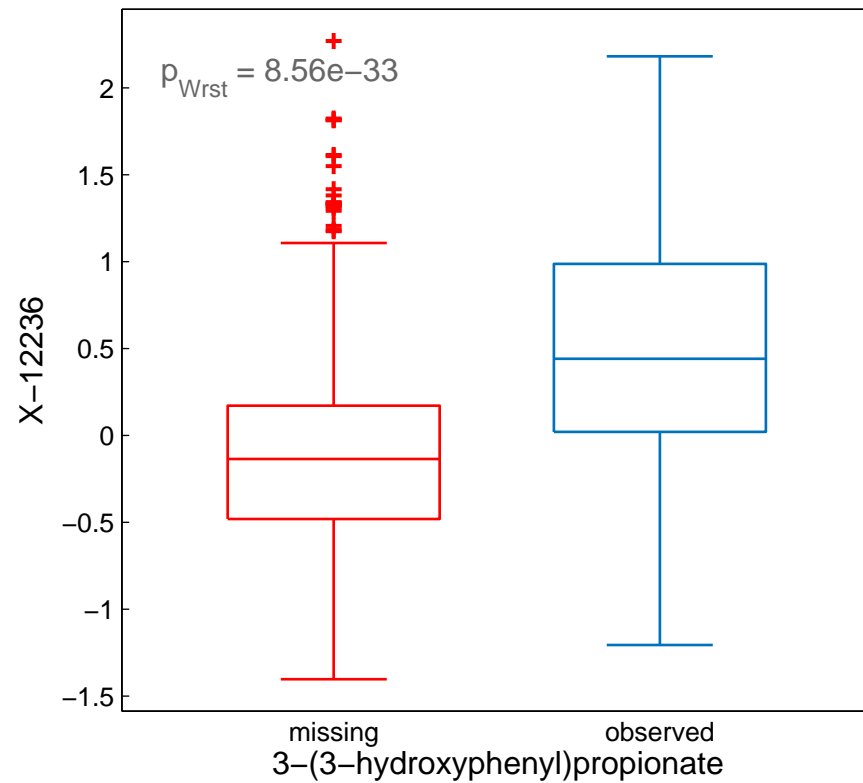

Missing values of X-13431  
in X-02249

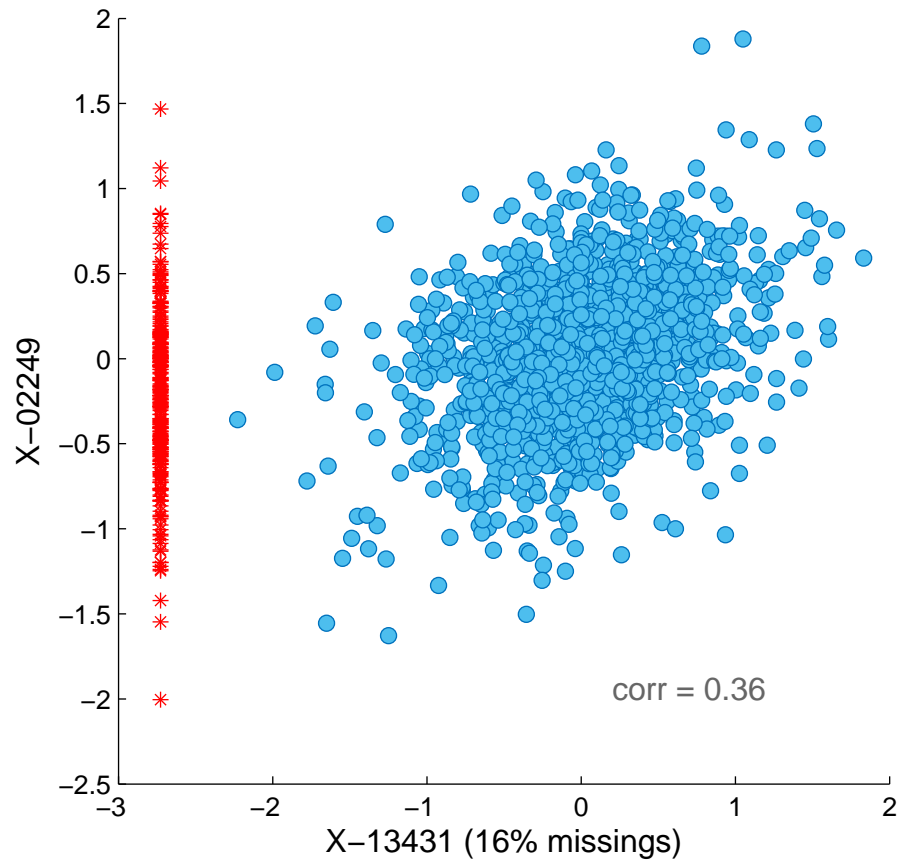

Concentrations of X-02249 in  
missing and observed X-13431

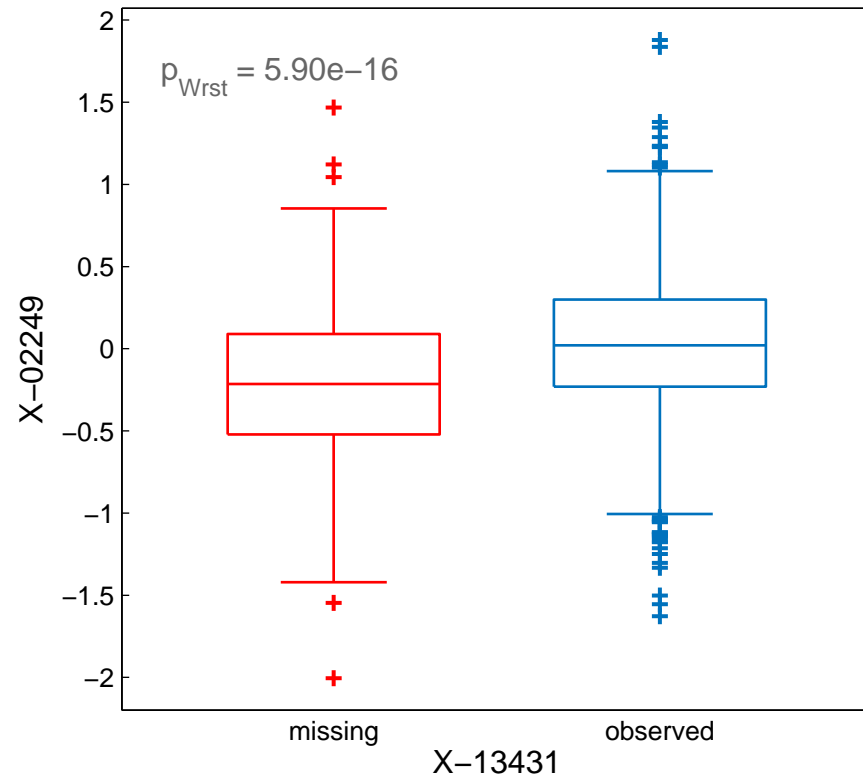

Missing values of X-13435  
in X-11421

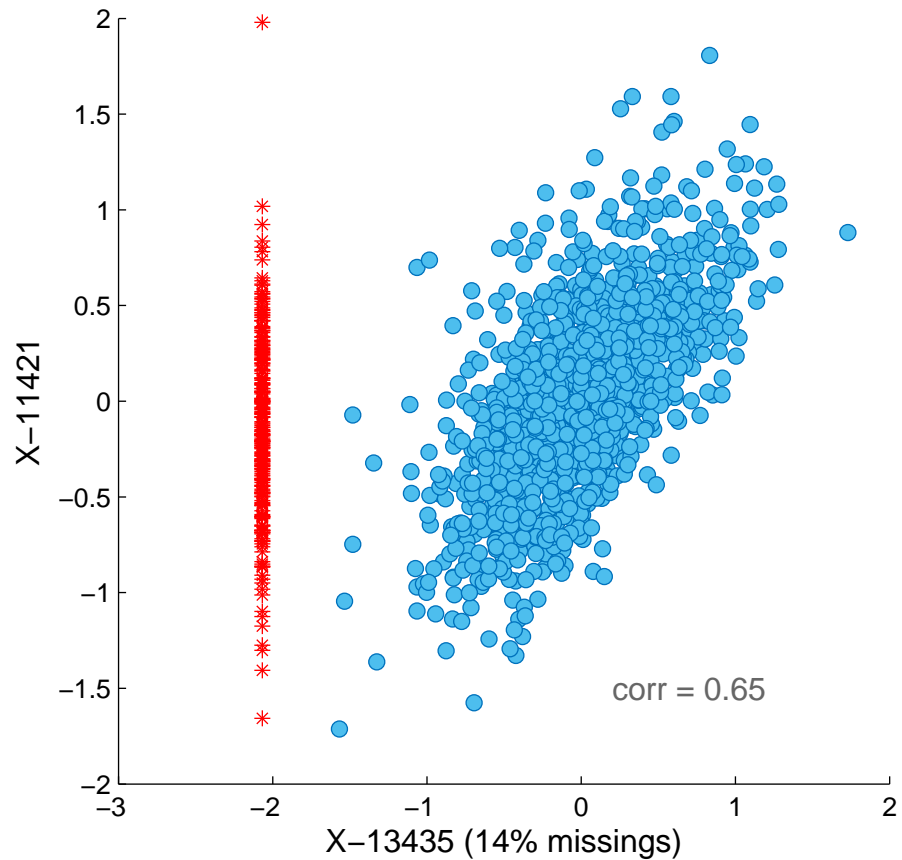

Concentrations of X-11421 in  
missing and observed X-13435

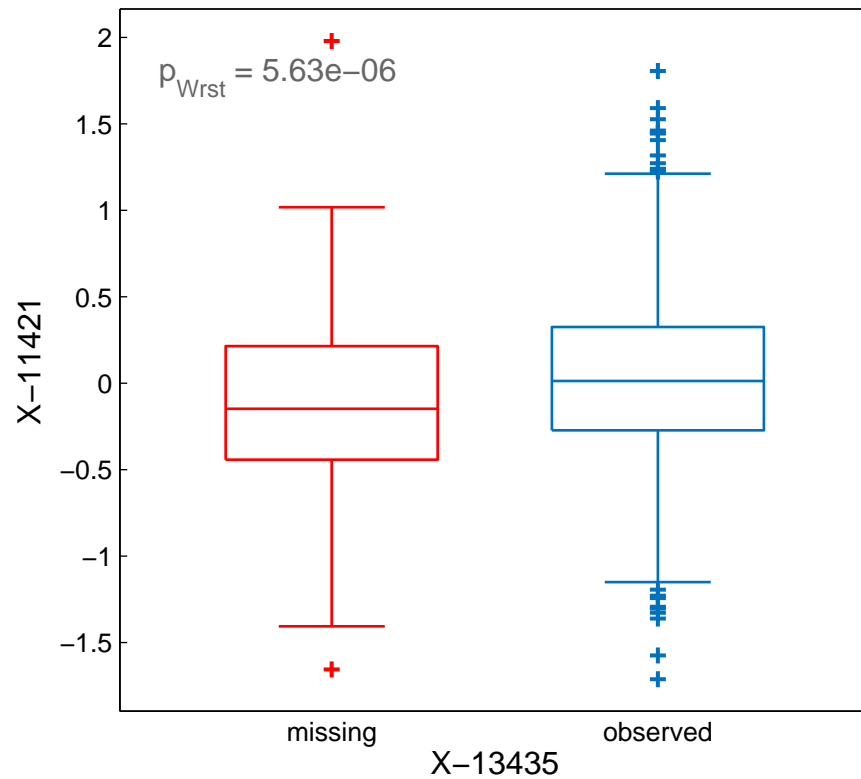



Missing values of X-13477  
in propionylcarnitine

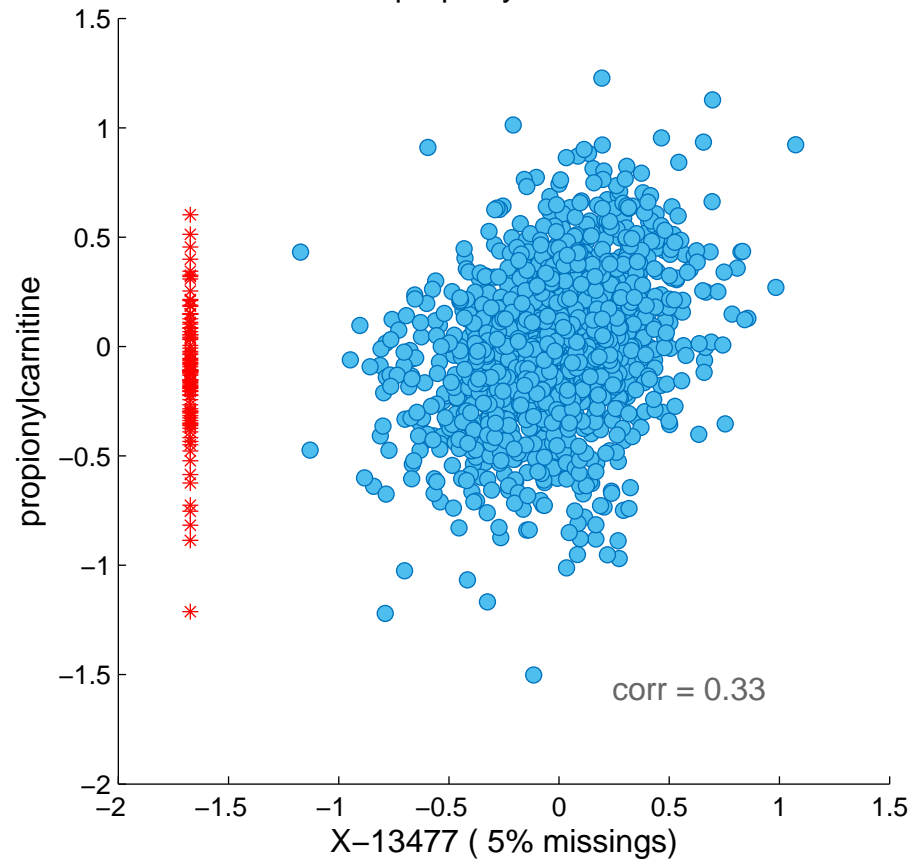

Concentrations of propionylcarnitine in  
missing and observed X-13477

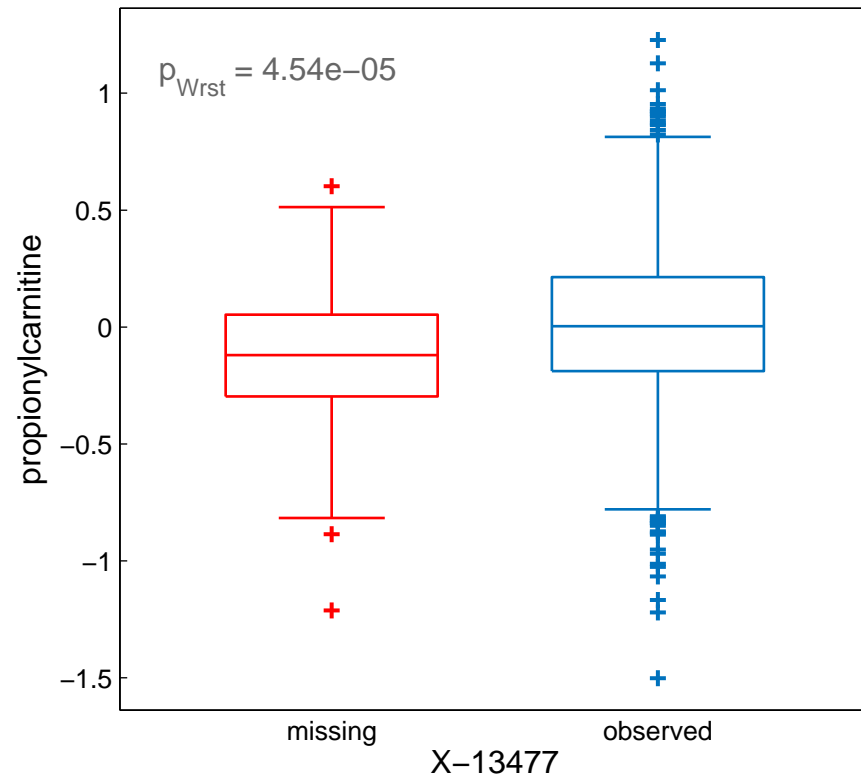

Missing values of X-13496  
in X-05907

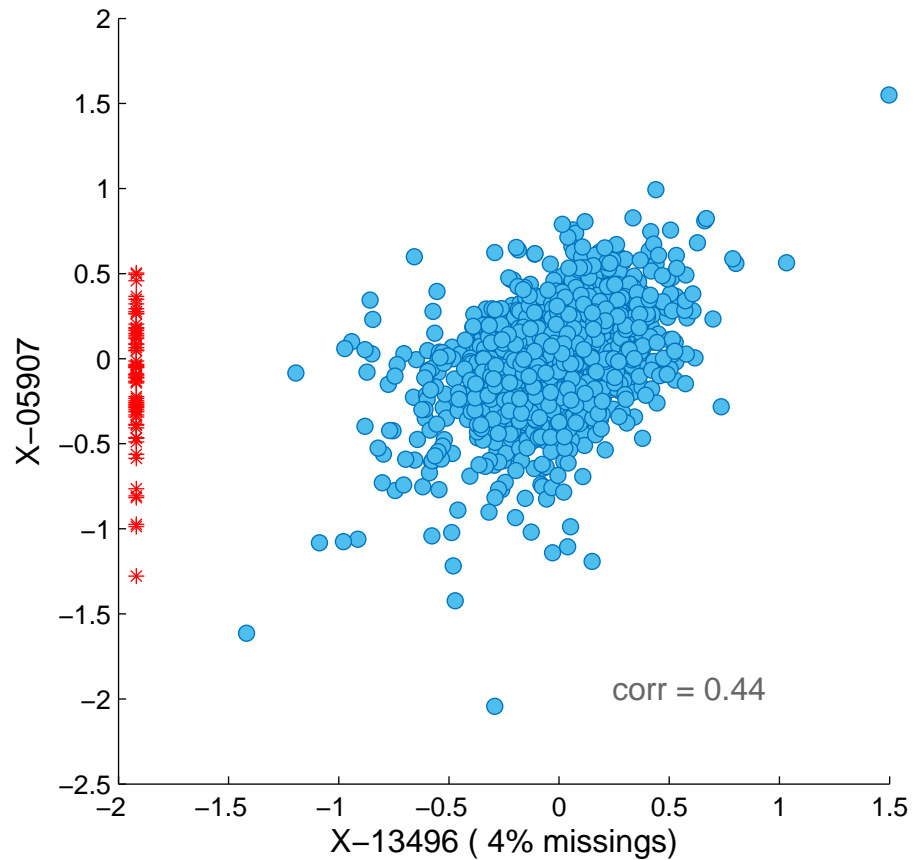

Concentrations of X-05907 in  
missing and observed X-13496

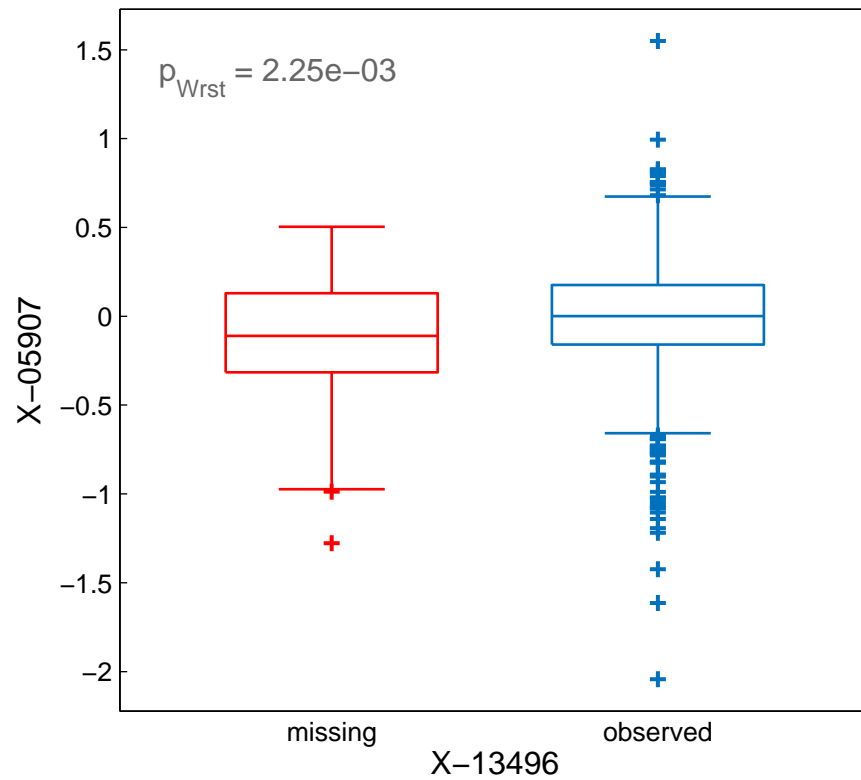

Missing values of X-13548  
in X-13549

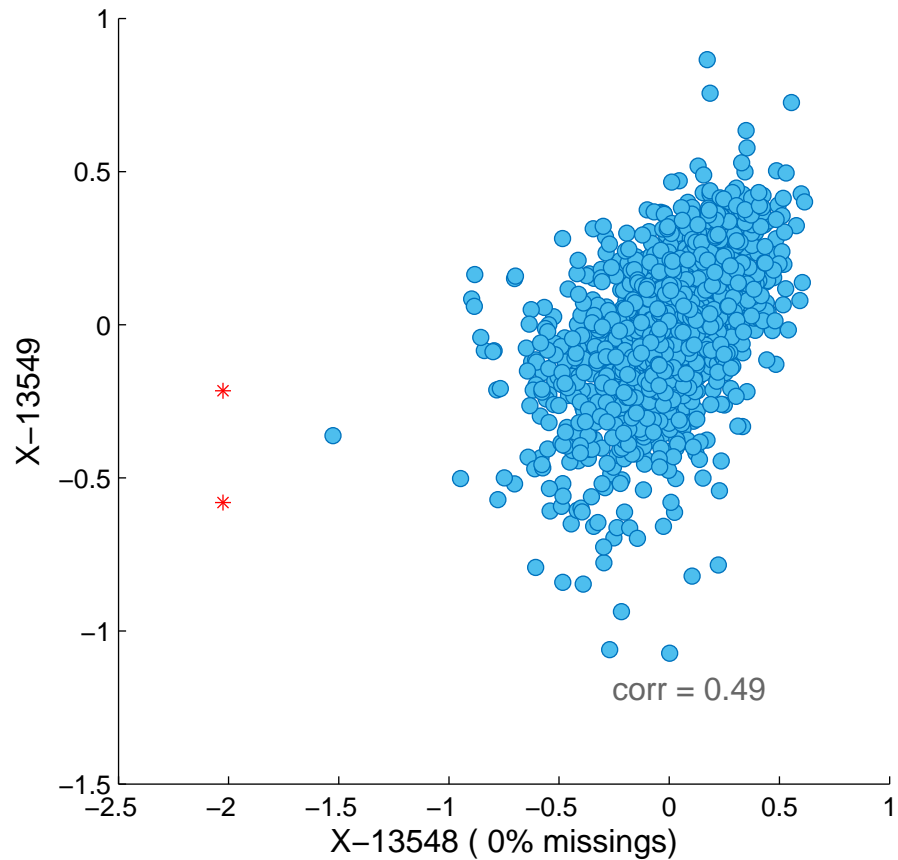

Concentrations of X-13549 in  
missing and observed X-13548

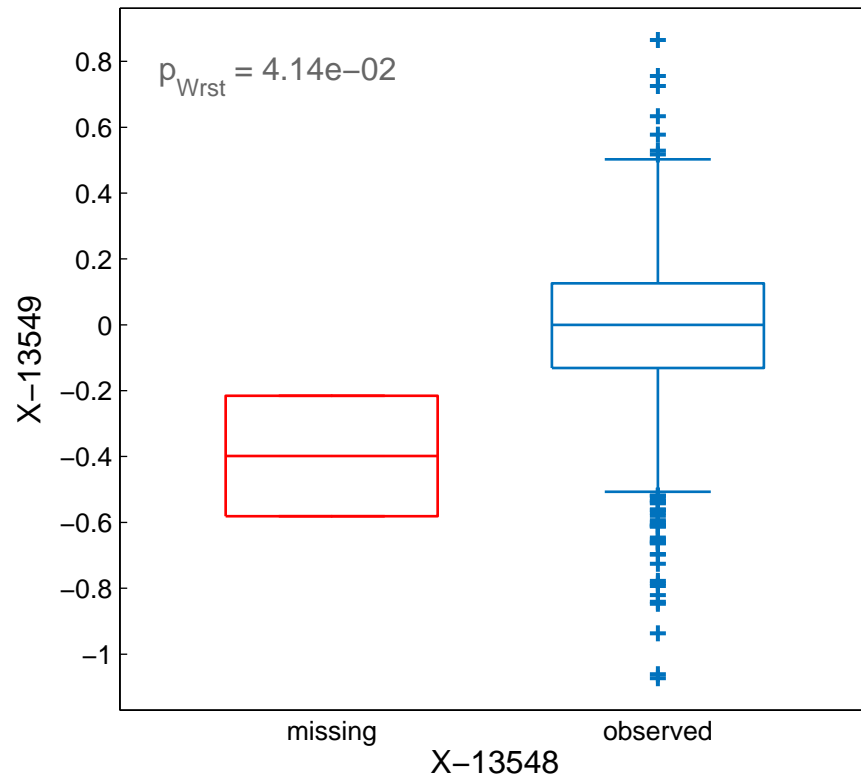

Missing values of X-13549  
in X-13548

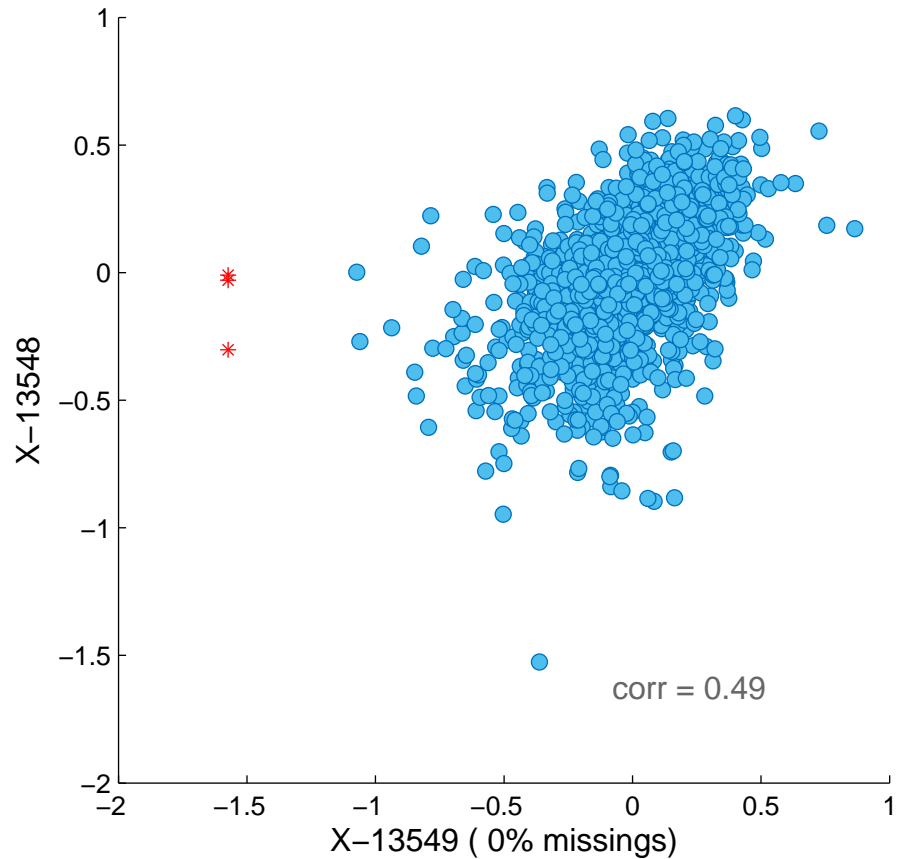

Concentrations of X-13548 in  
missing and observed X-13549

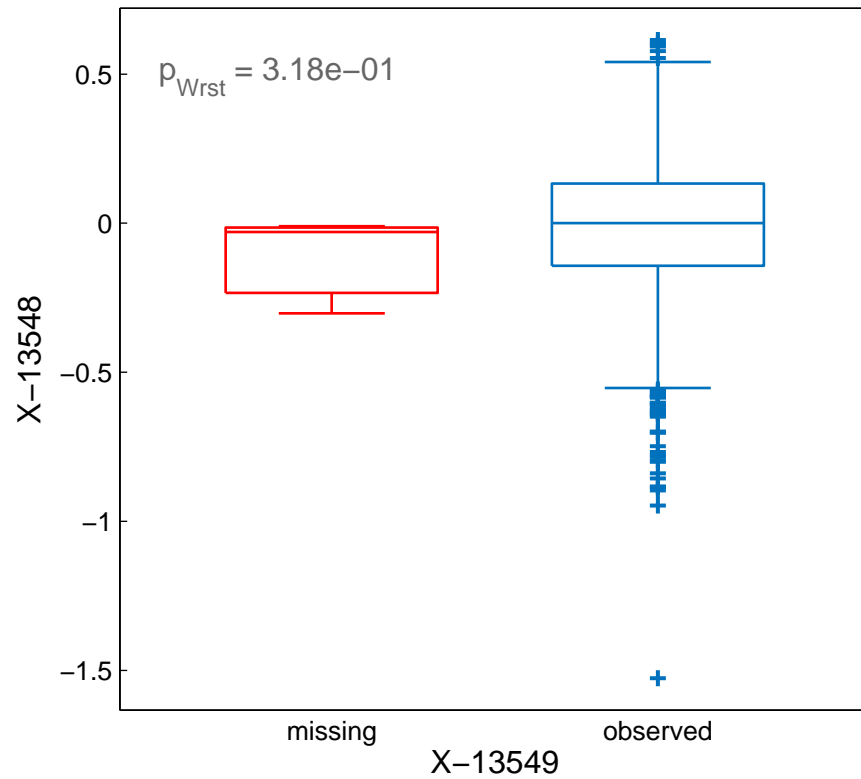

Missing values of X-13553  
in C-glycosyltryptophan

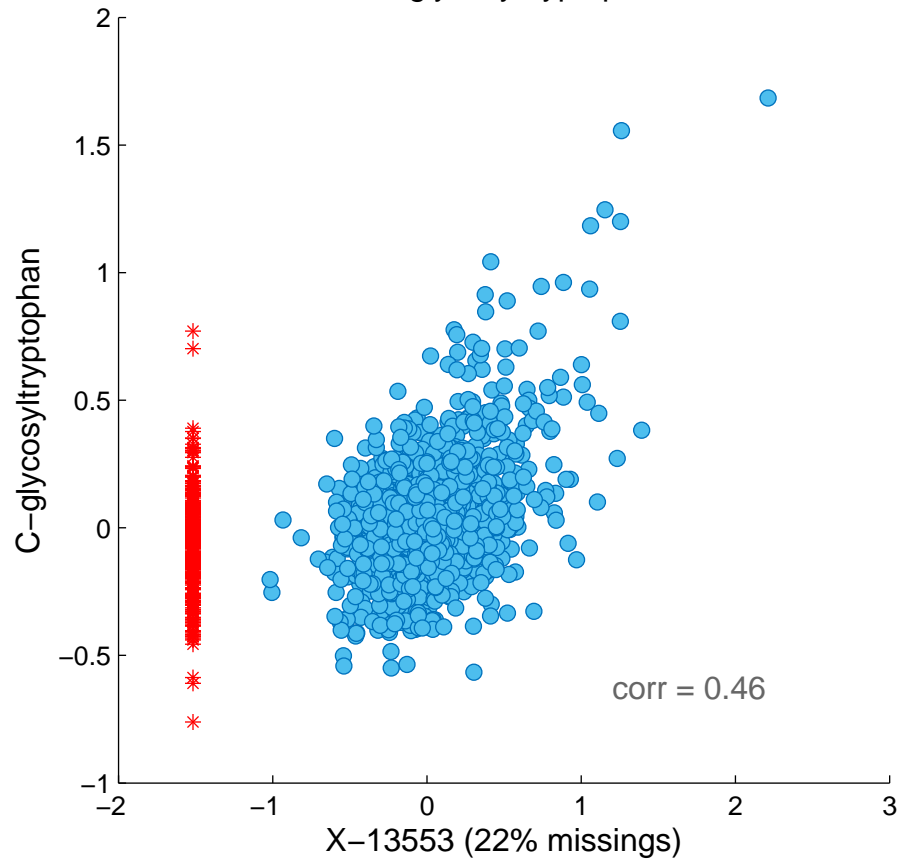

Concentrations of C-glycosyltryptophan in  
missing and observed X-13553

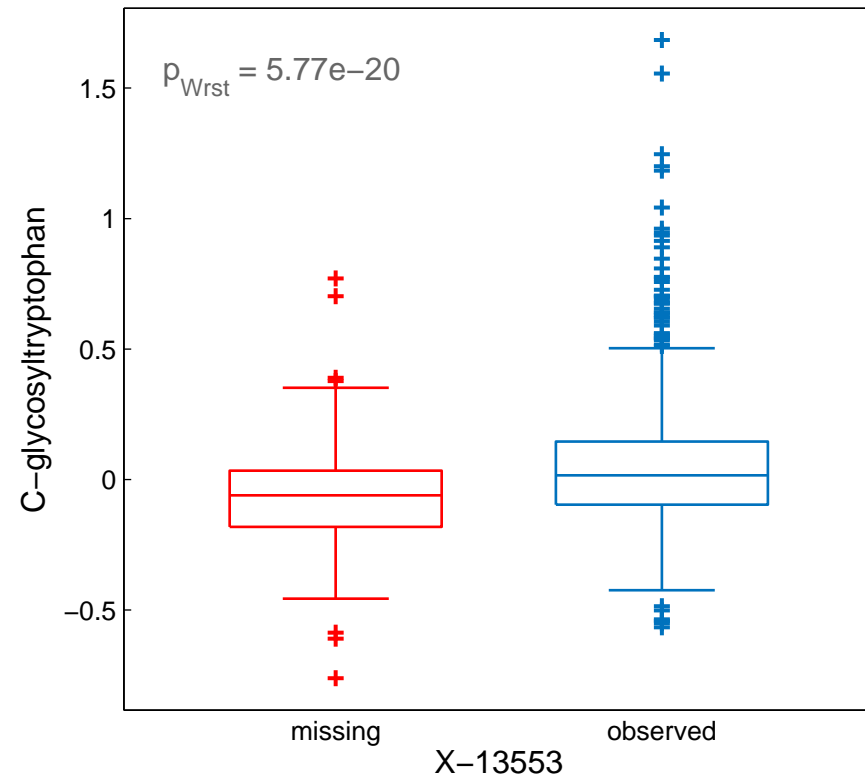

Missing values of X-13640  
in saccharin

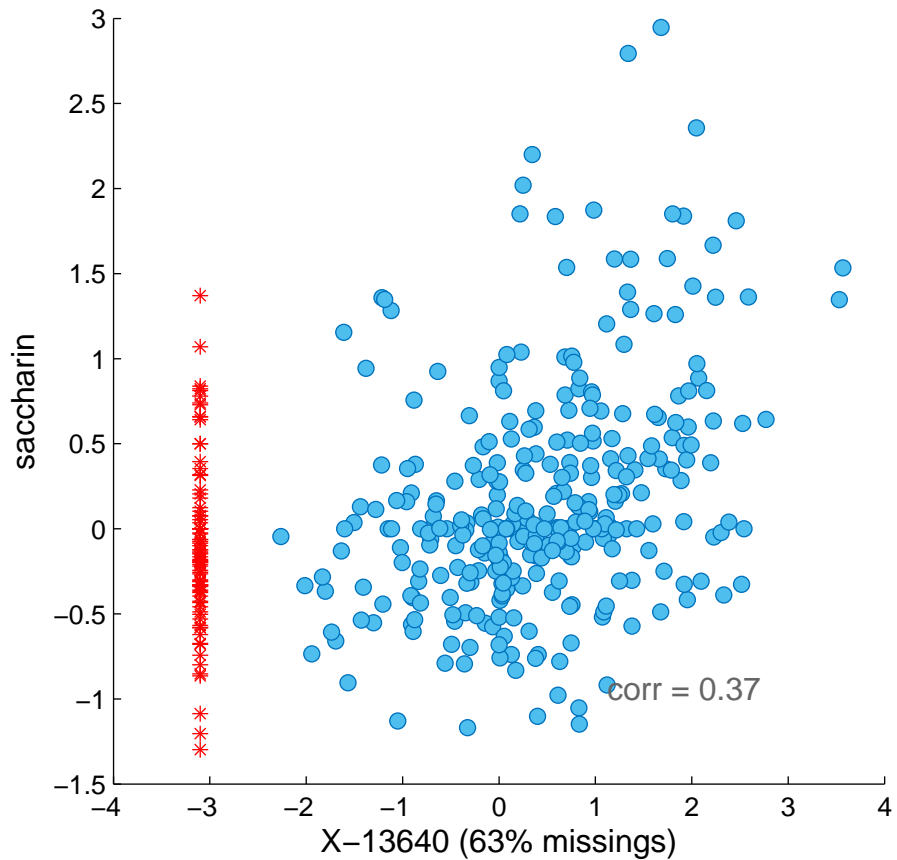

Concentrations of saccharin in  
missing and observed X-13640

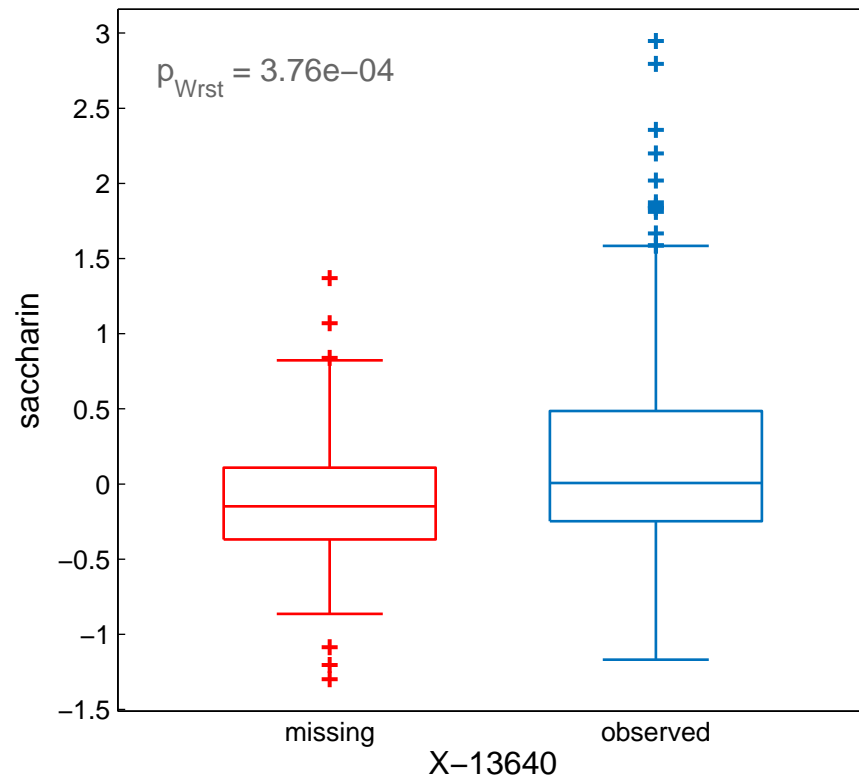

Missing values of X-13658  
in 1;3;7-trimethylurate

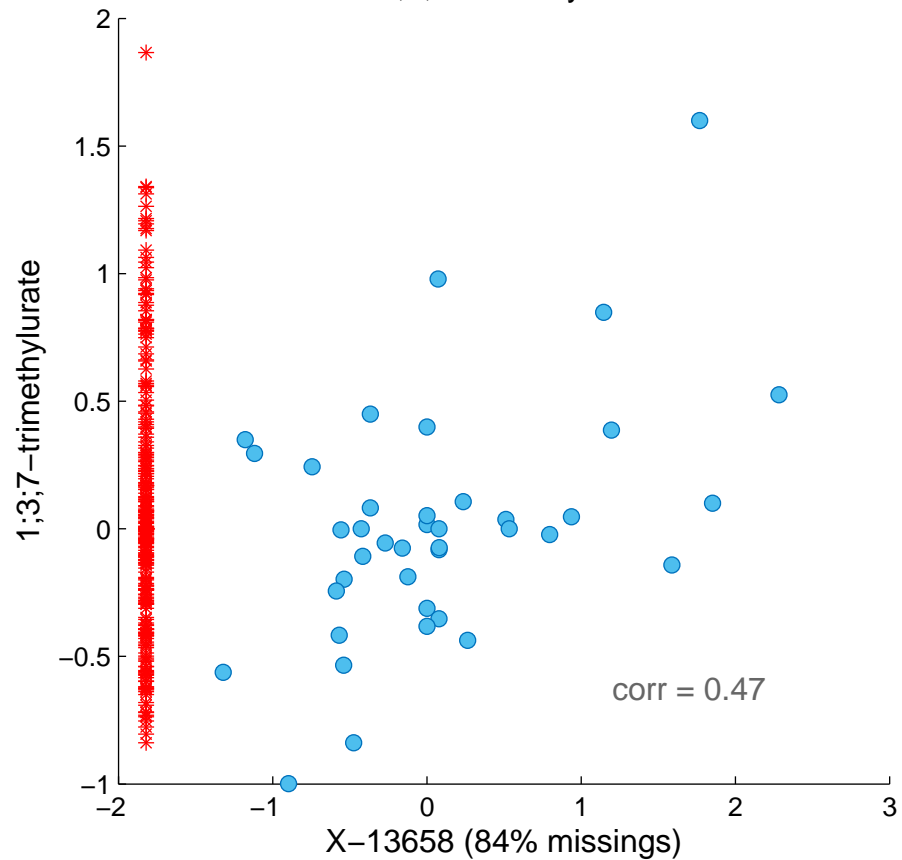

Concentrations of 1;3;7-trimethylurate in  
missing and observed X-13658

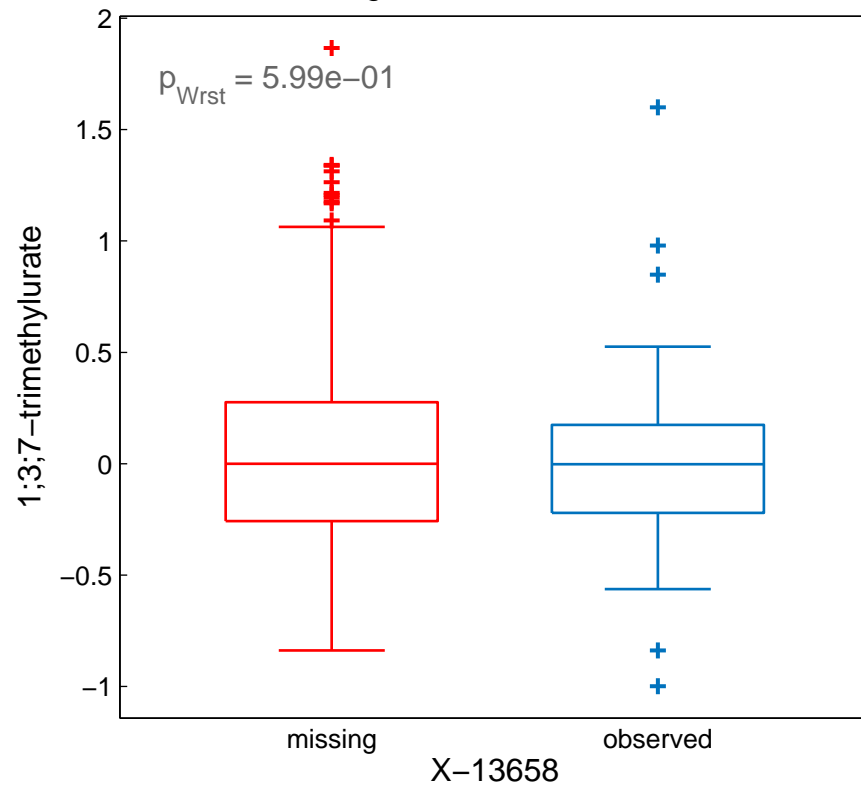

Missing values of 3-(4-hydroxyphenyl)lactate  
in alpha-hydroxyisovalerate

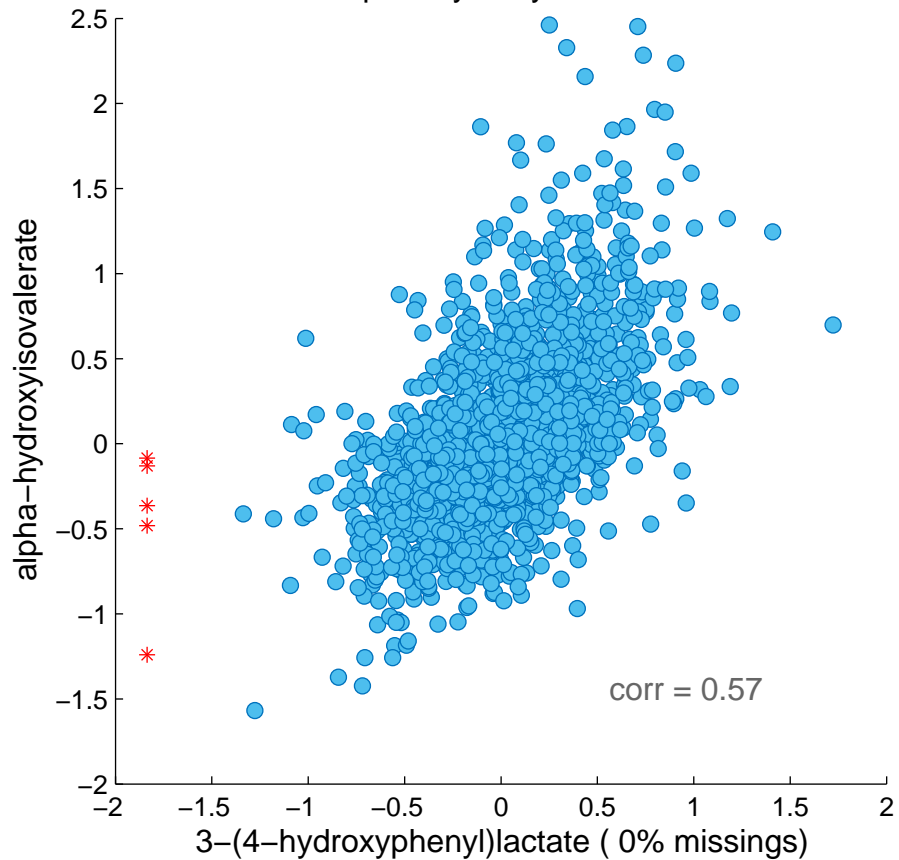

Concentrations of alpha-hydroxyisovalerate in  
missing and observed 3-(4-hydroxyphenyl)lactate

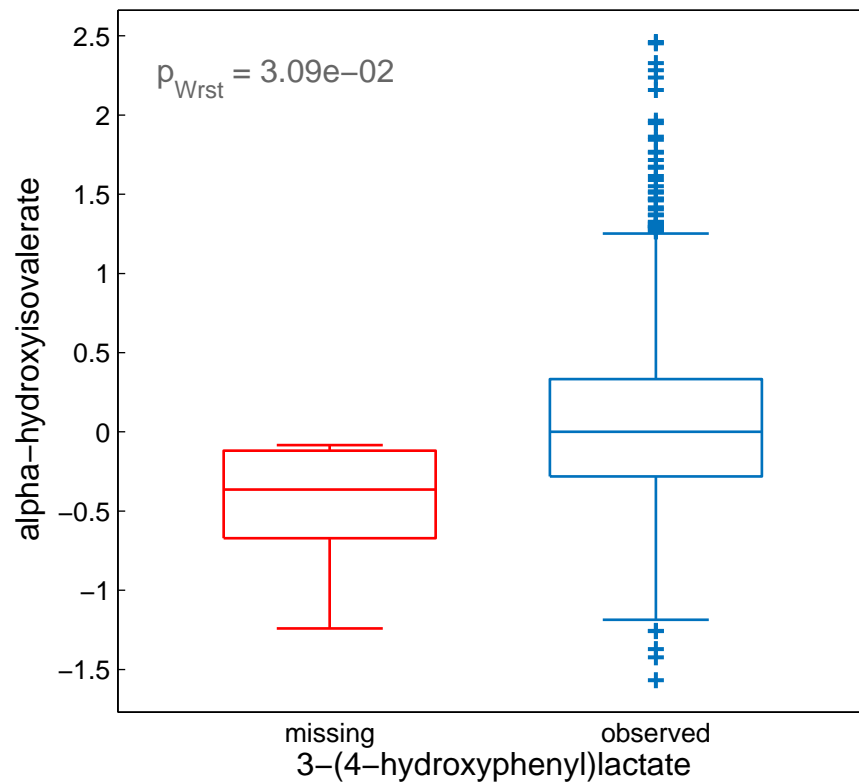



Missing values of X-13741  
in X-12039

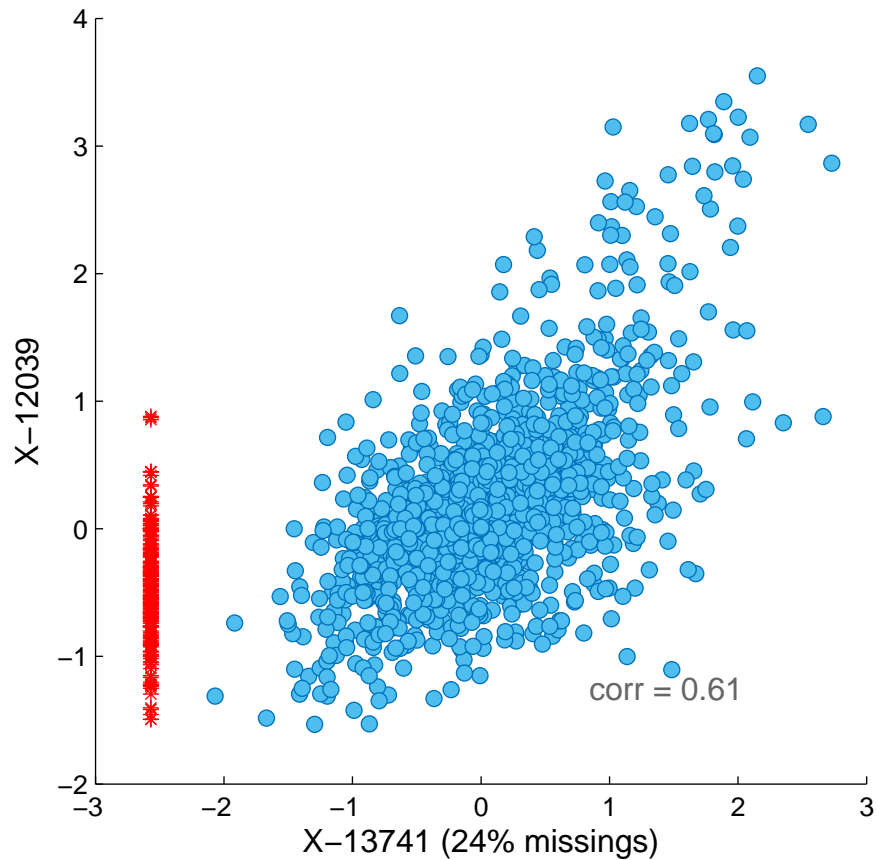

Concentrations of X-12039 in  
missing and observed X-13741

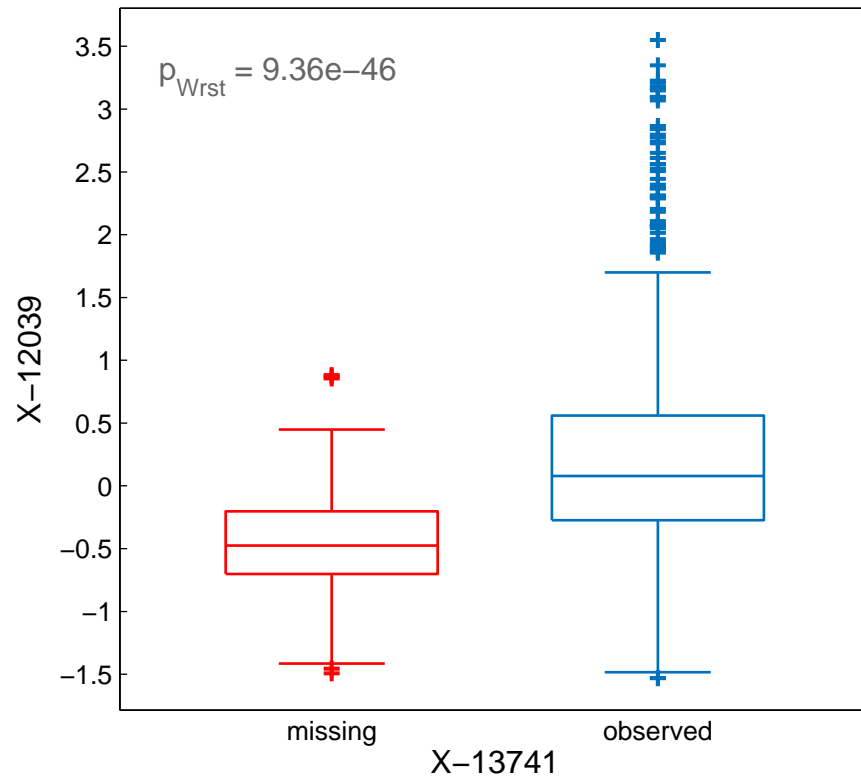

Missing values of X-13859  
in 2-hydroxypalmitate

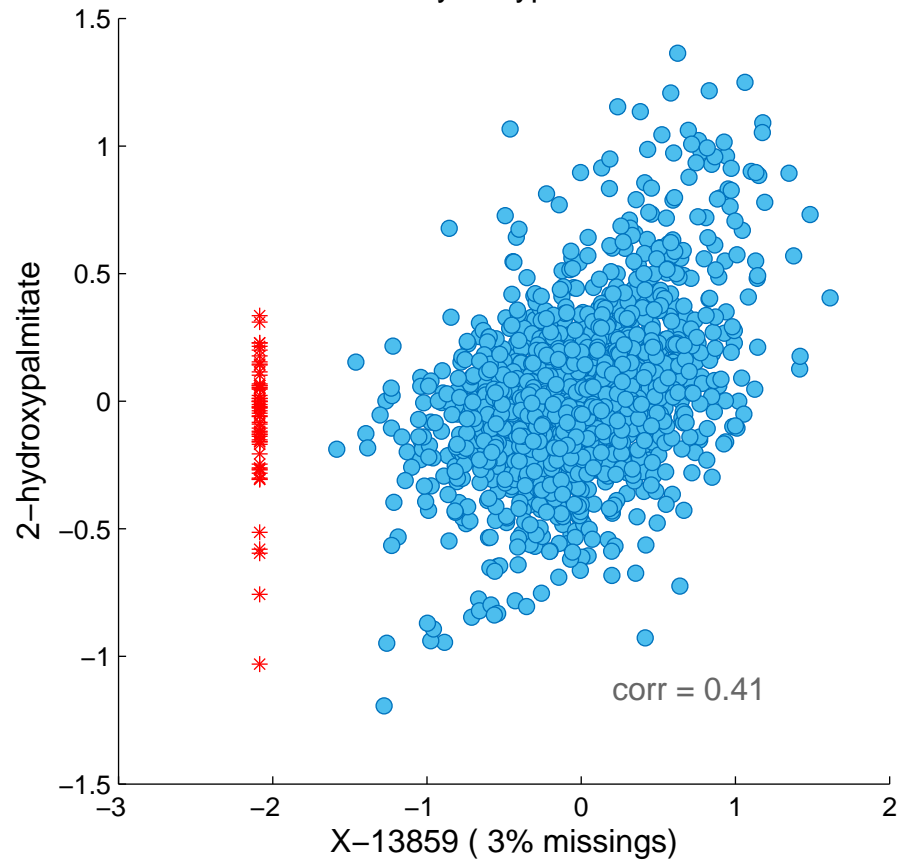

Concentrations of 2-hydroxypalmitate in  
missing and observed X-13859

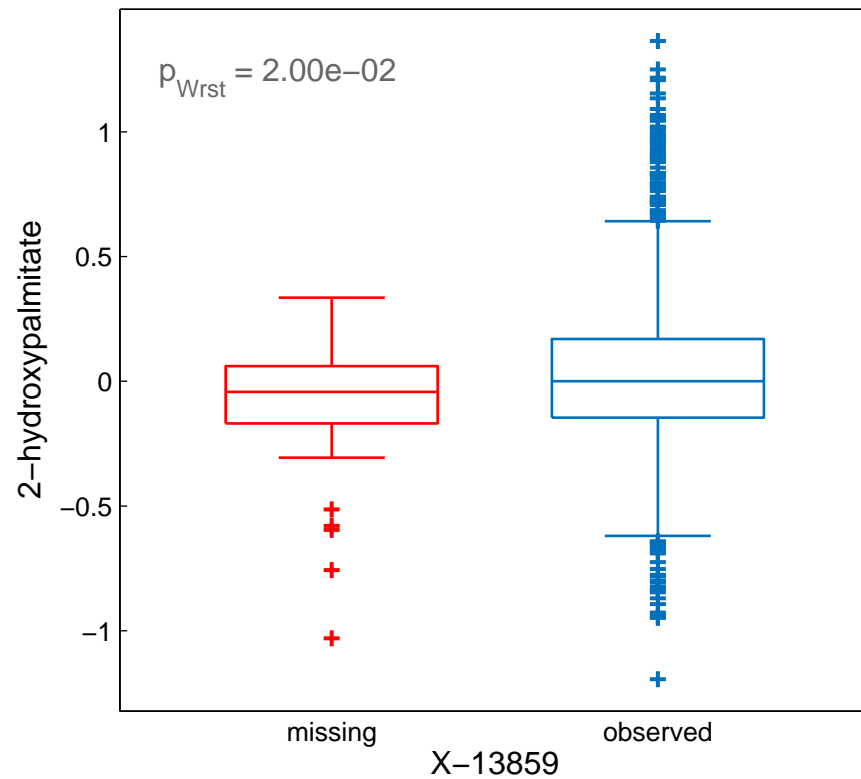

Missing values of X-14057  
in X-14056

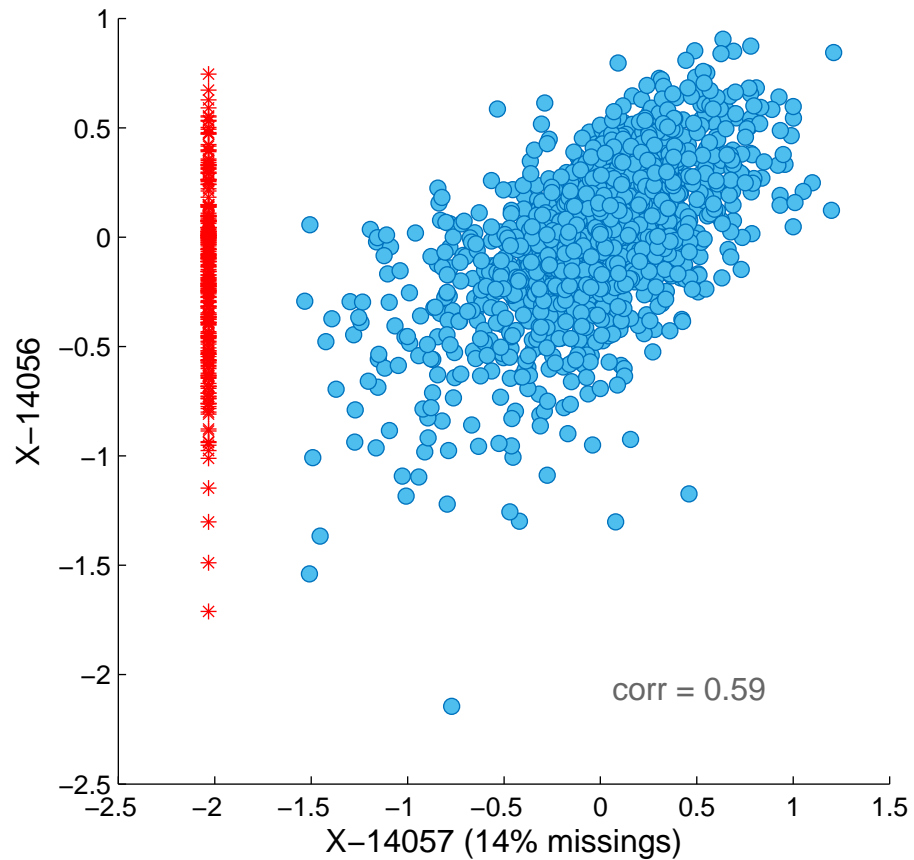

Concentrations of X-14056 in  
missing and observed X-14057

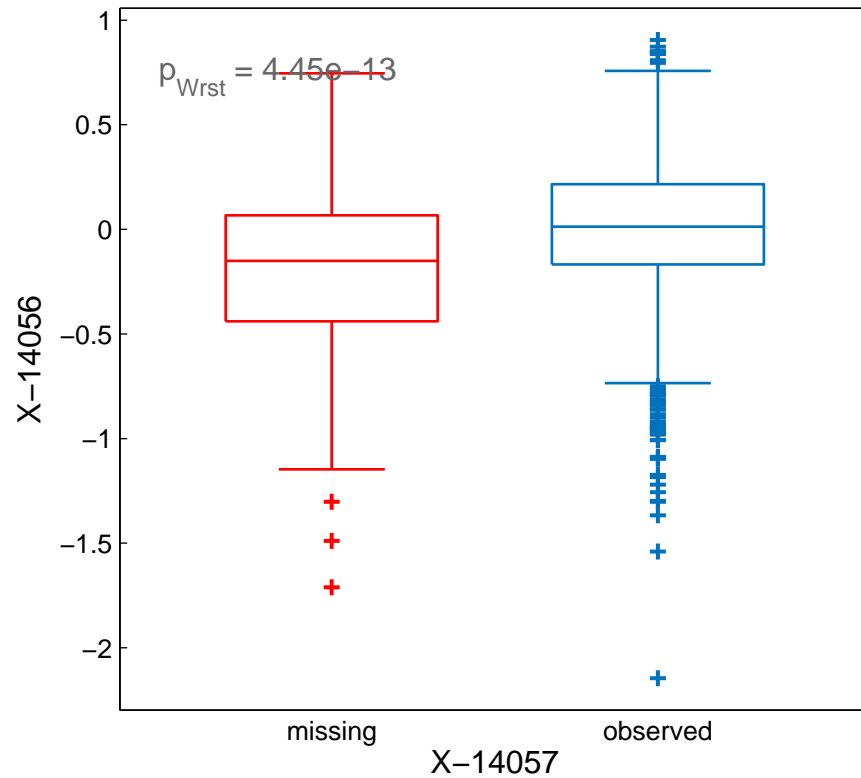

Missing values of X-14086  
in X-14189

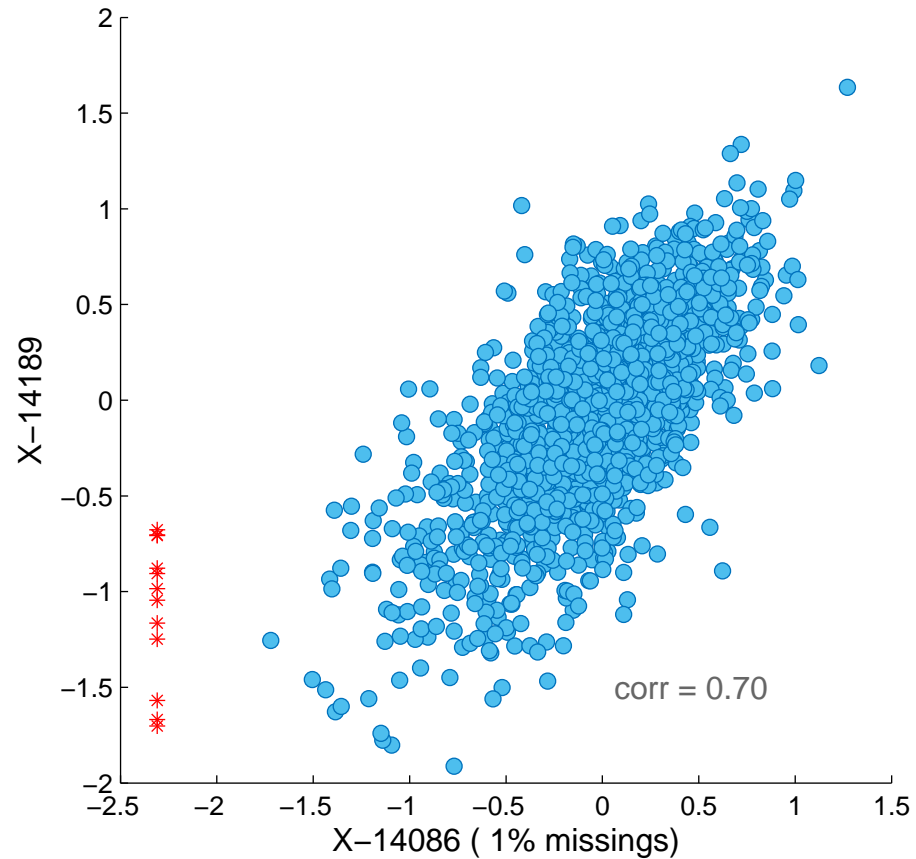

Concentrations of X-14189 in  
missing and observed X-14086

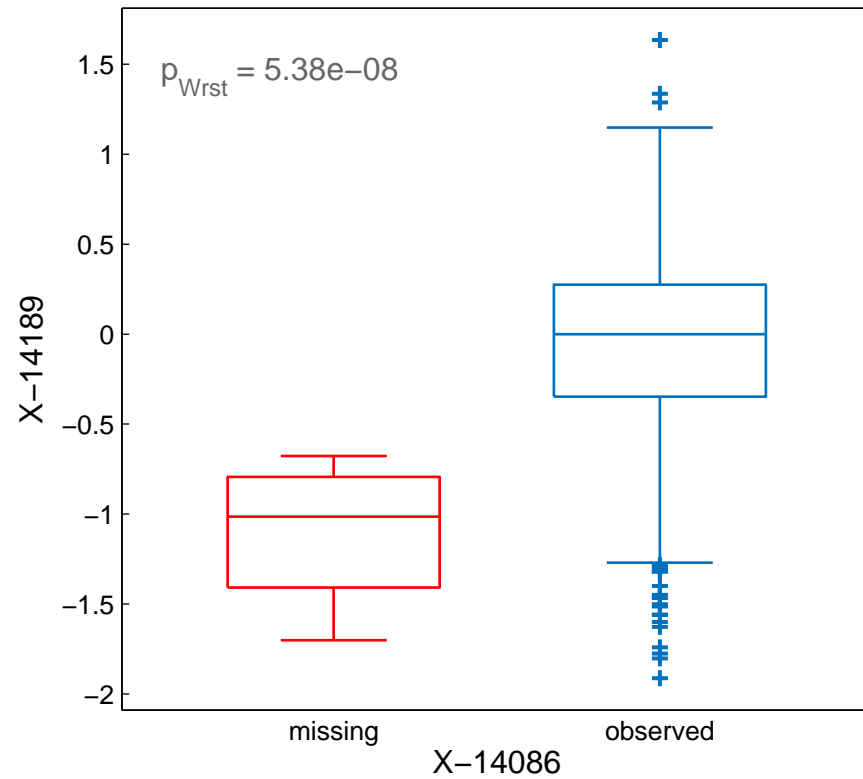

Missing values of X-14189  
in X-14189

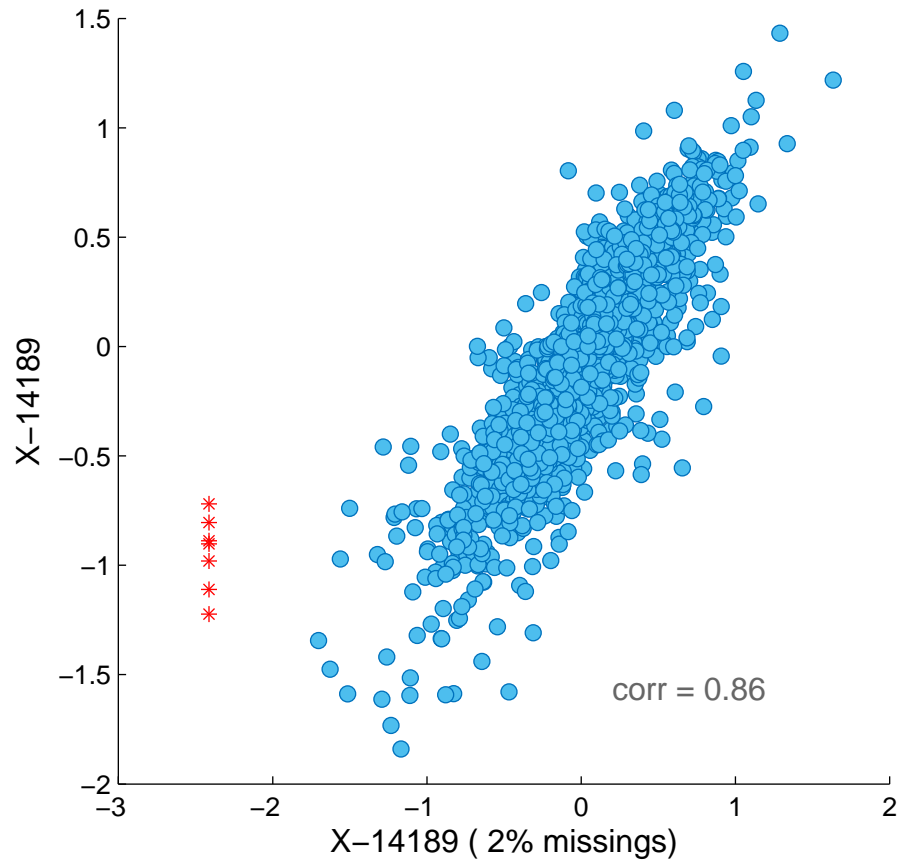

Concentrations of X-14189 in  
missing and observed X-14189

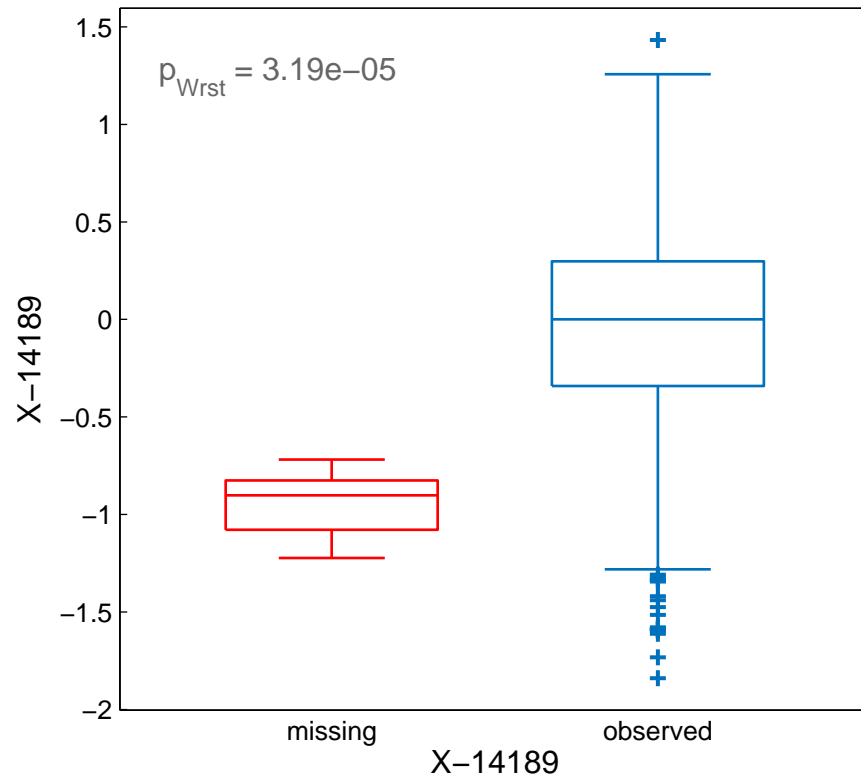

Missing values of X-14205  
in X-14208

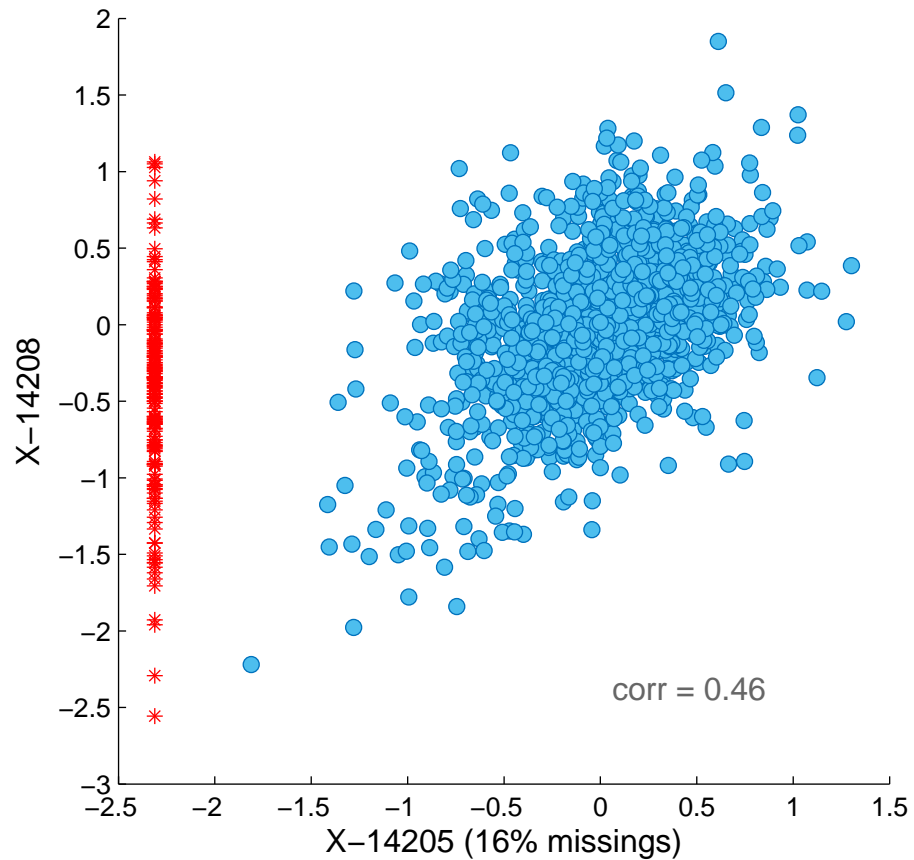

Concentrations of X-14208 in  
missing and observed X-14205

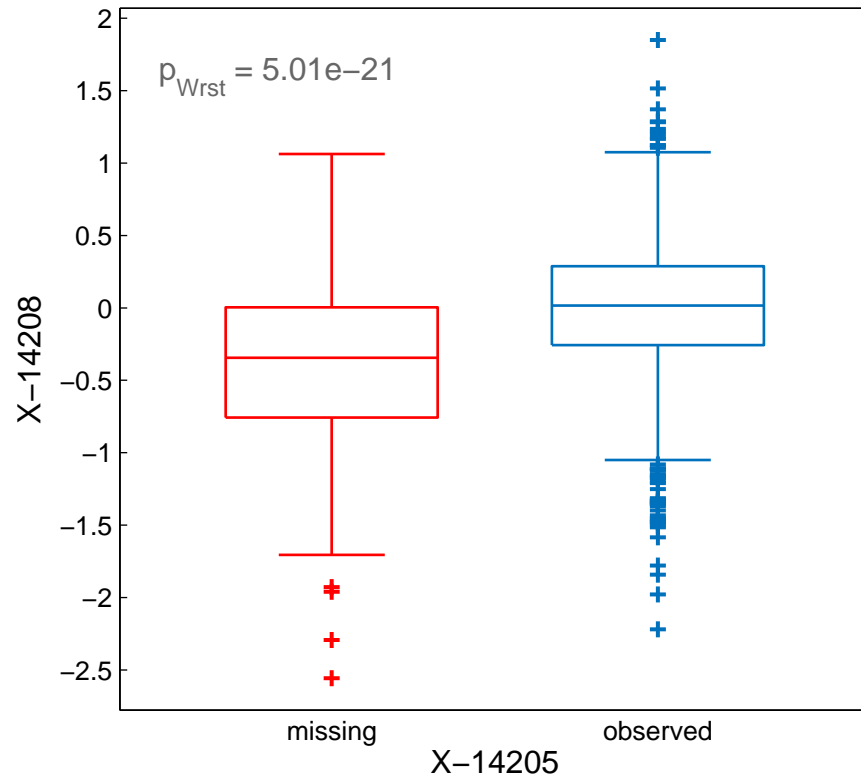

Missing values of X-14208  
in phenylalanylphenylalanine

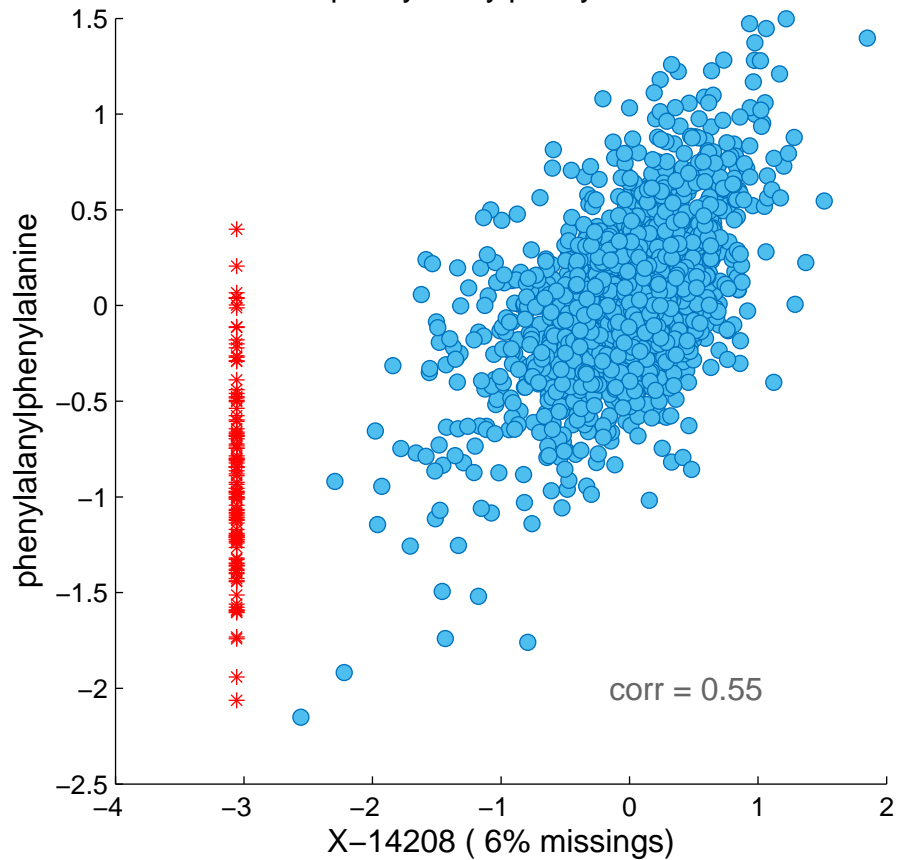

Concentrations of phenylalanylphenylalanine in  
missing and observed X-14208

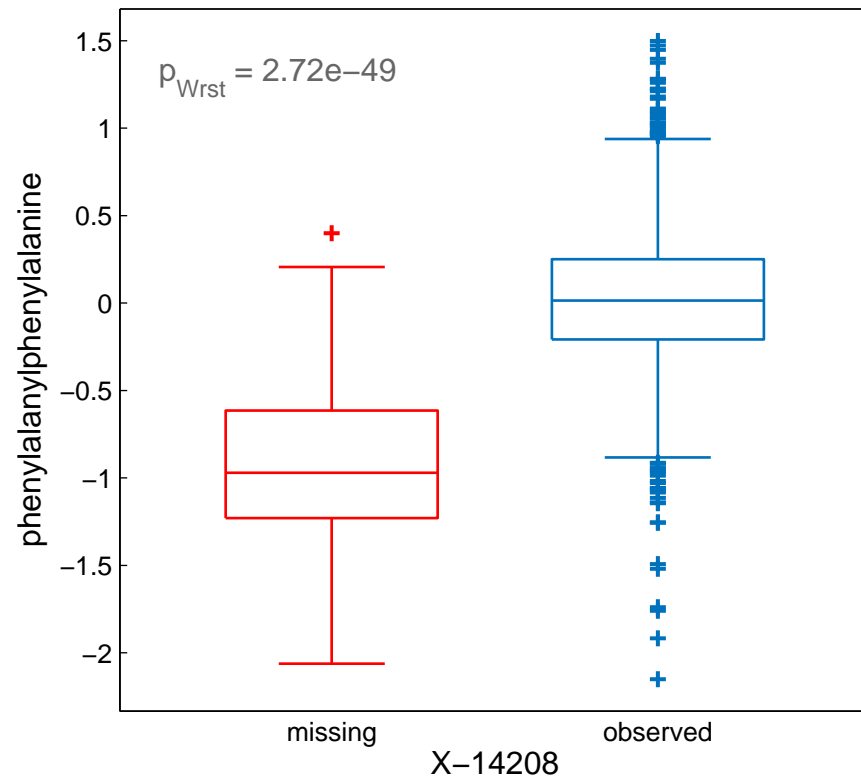

Missing values of X-14189  
in X-14189

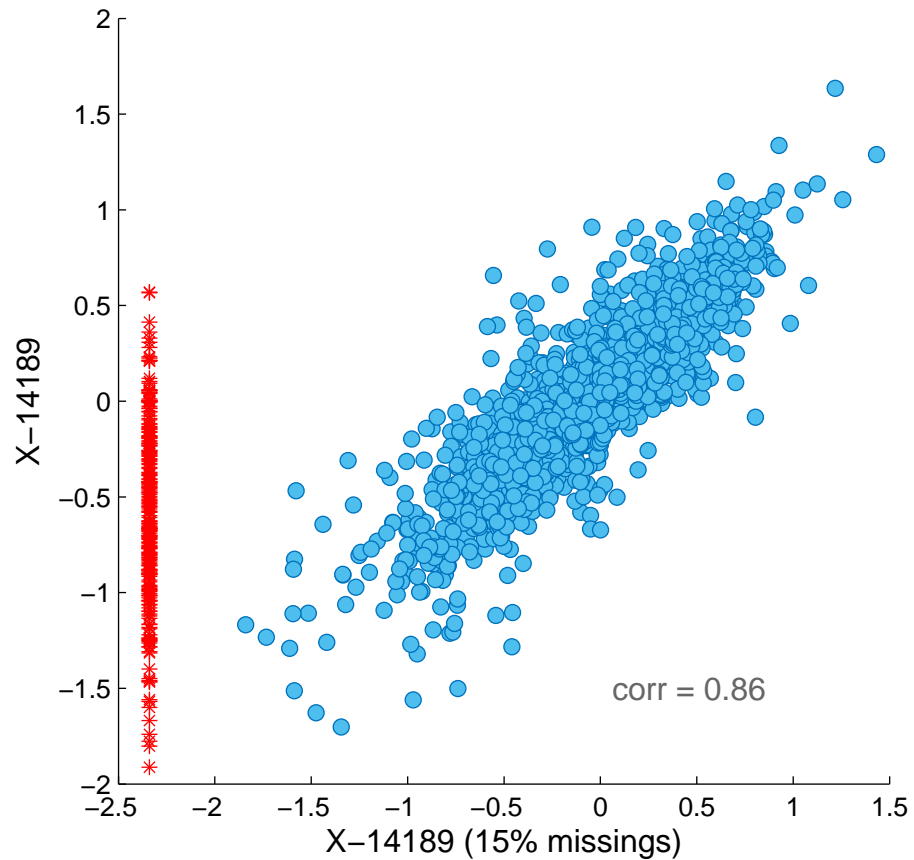

Concentrations of X-14189 in  
missing and observed X-14189

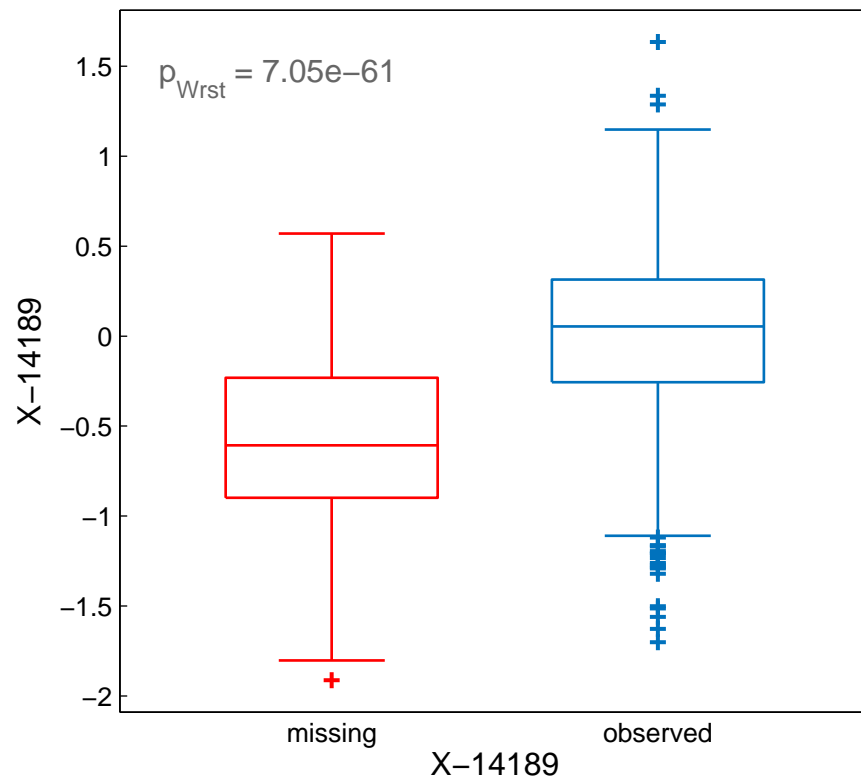



Missing values of 3-carboxy-4-methyl-5-propyl-2-furanpropanoate (CMPF) in X-02269

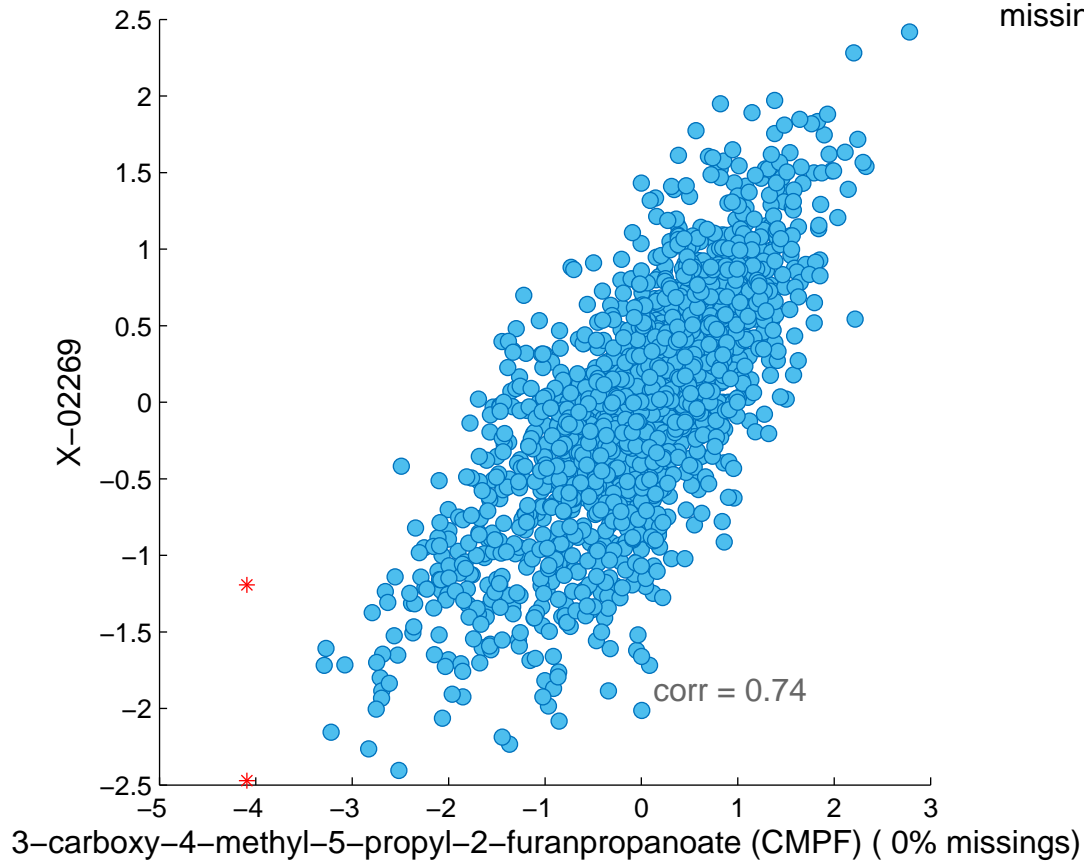

Concentrations of X-02269 in missing and observed 3-carboxy-4-methyl-5-propyl-2-furanpropanoate (CMPF)

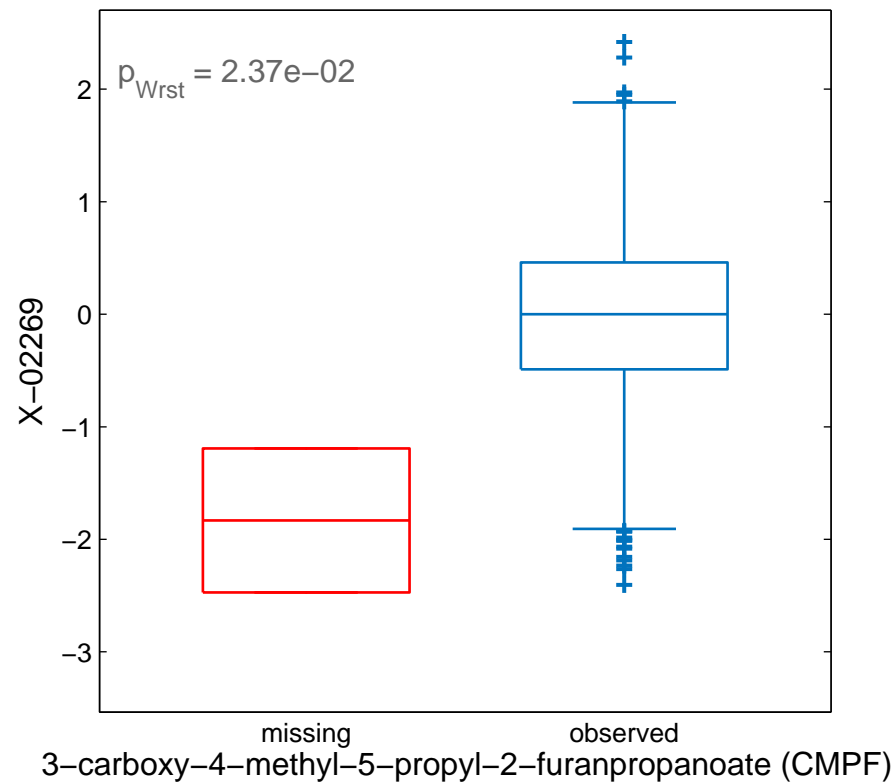

Missing values of X-14374  
in X-14473

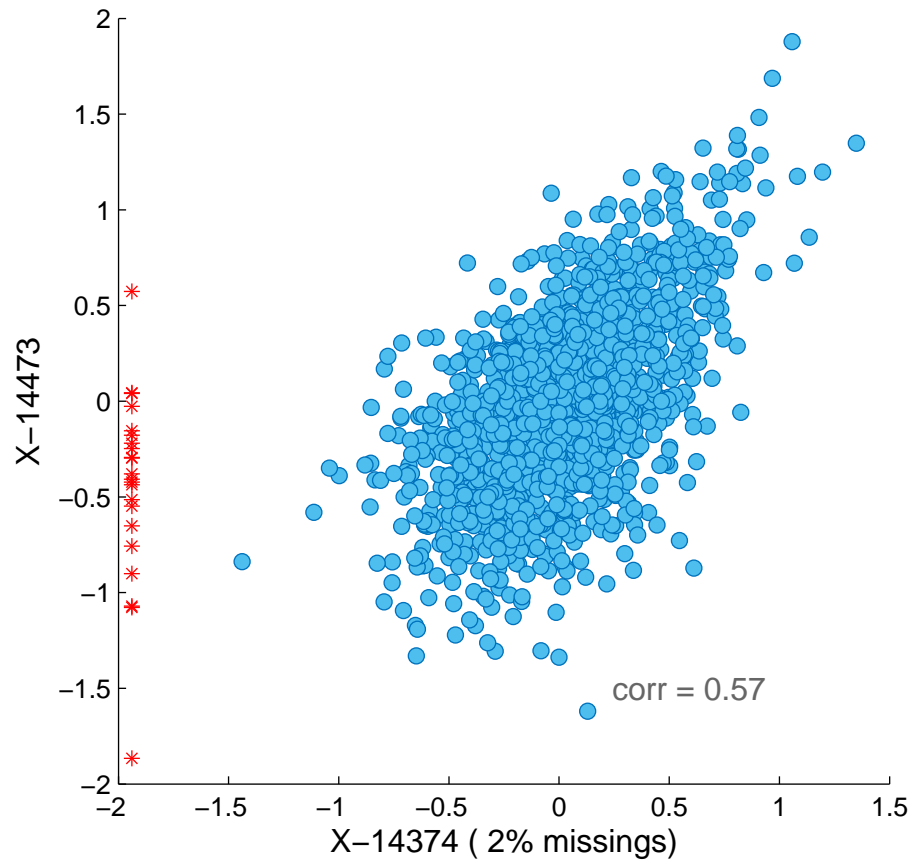

Concentrations of X-14473 in  
missing and observed X-14374

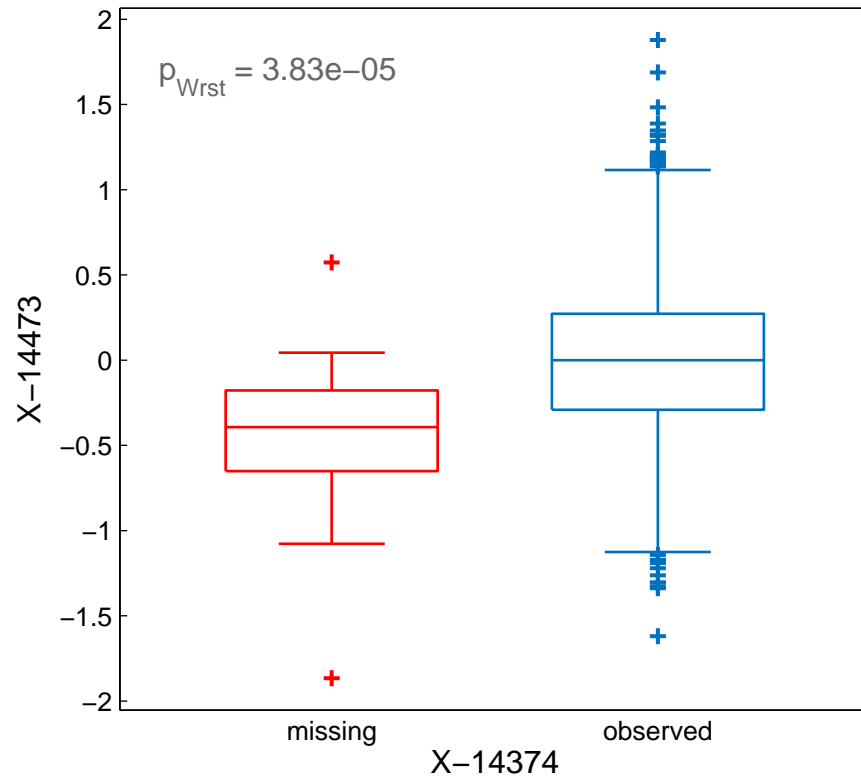

Missing values of phenylalanylleucine  
in aspartylphenylalanine

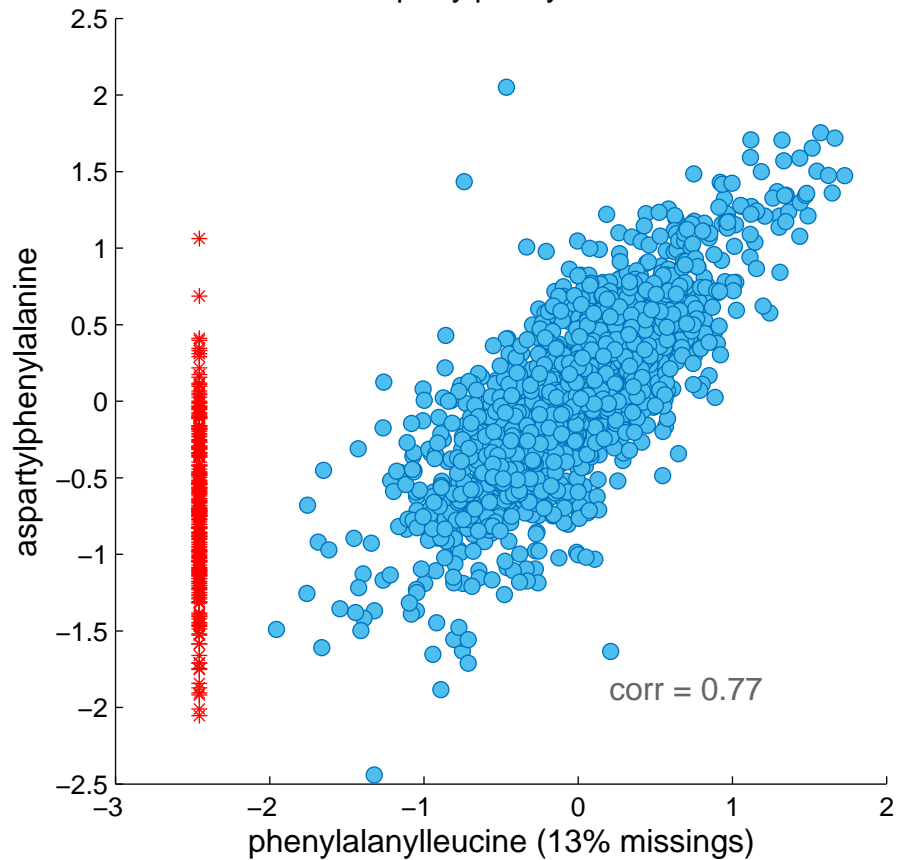

Concentrations of aspartylphenylalanine in  
missing and observed phenylalanylleucine

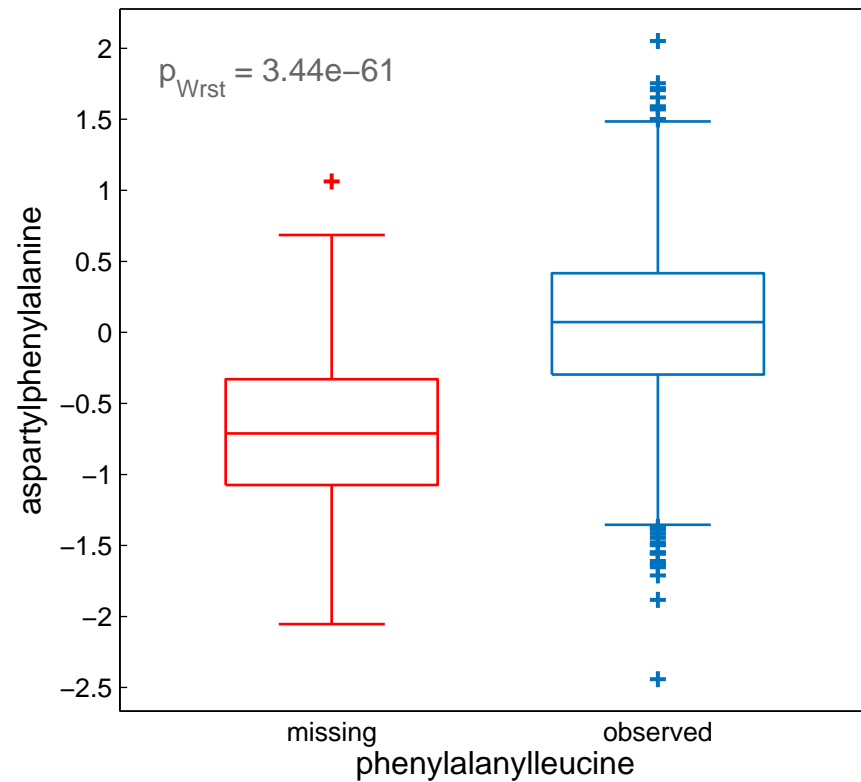

Missing values of X-14473  
in X-14486

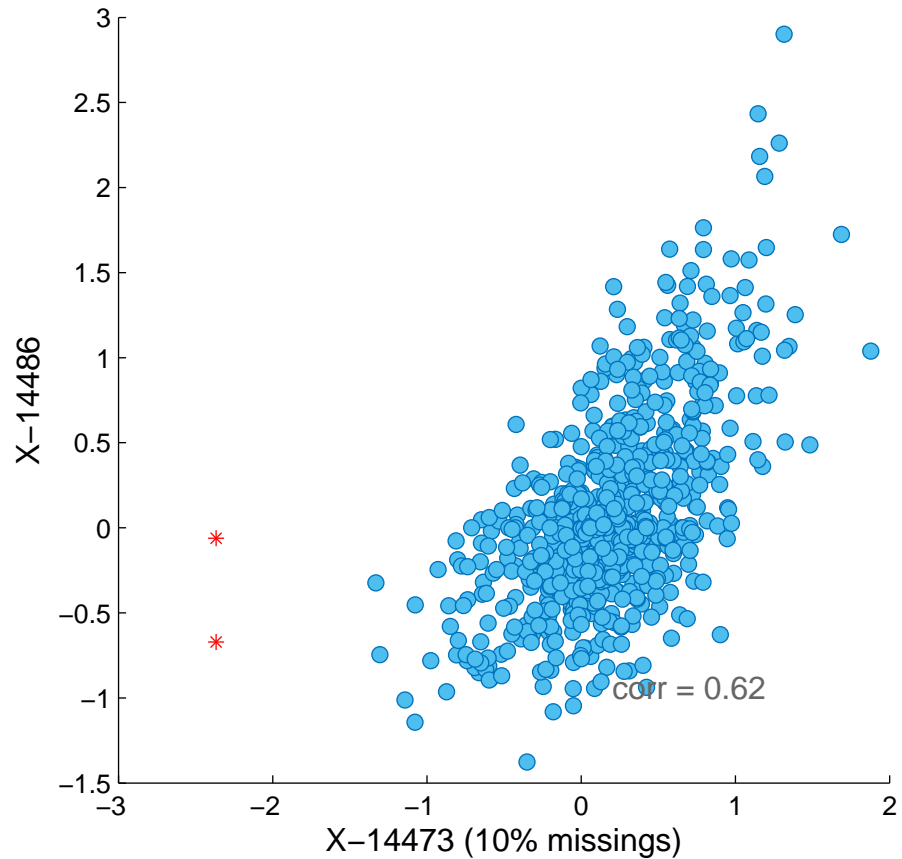

Concentrations of X-14486 in  
missing and observed X-14473

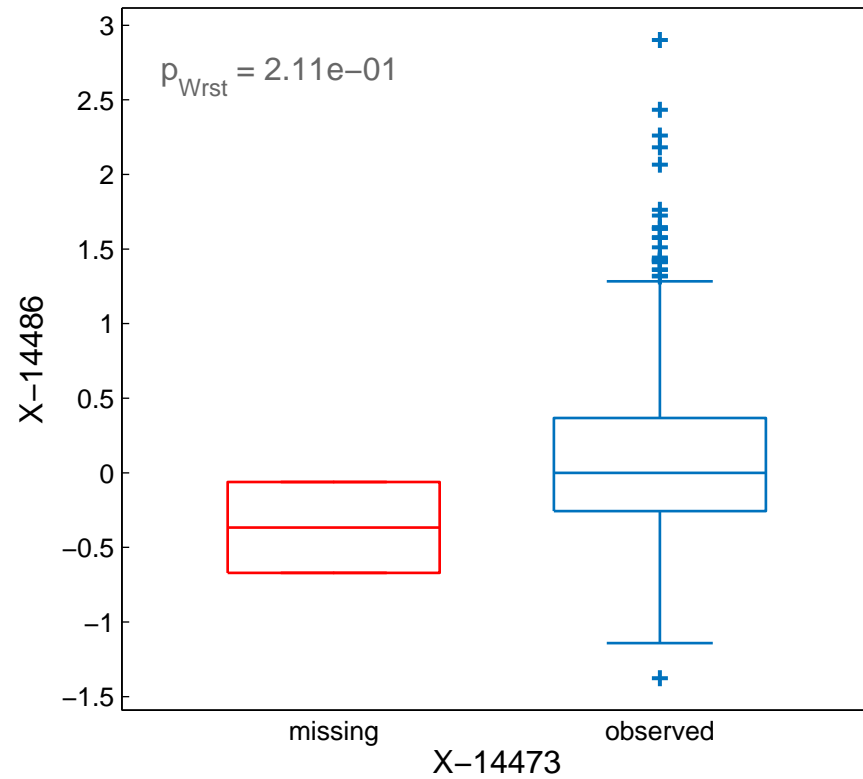

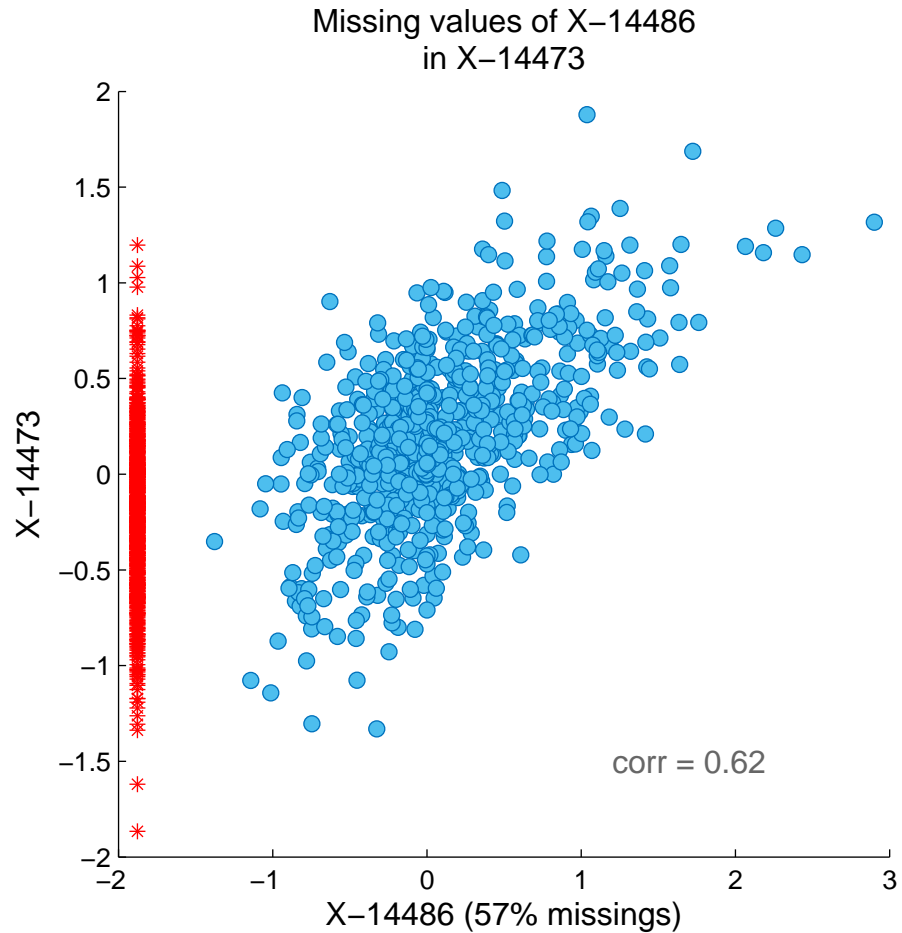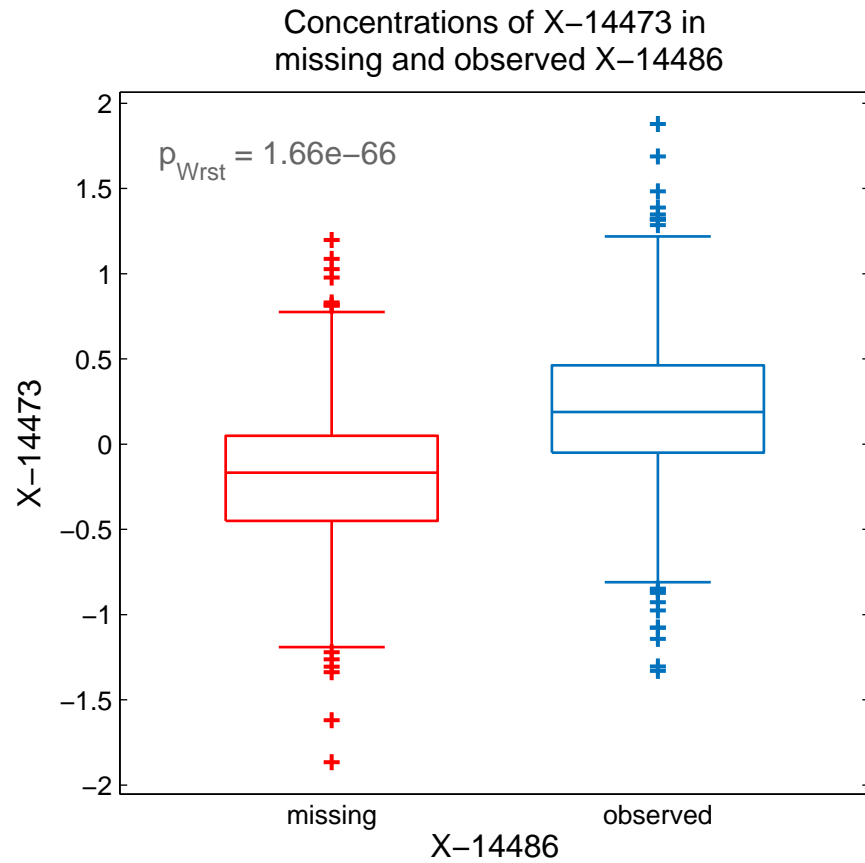

Missing values of X-14541  
in phenylalanylleucine

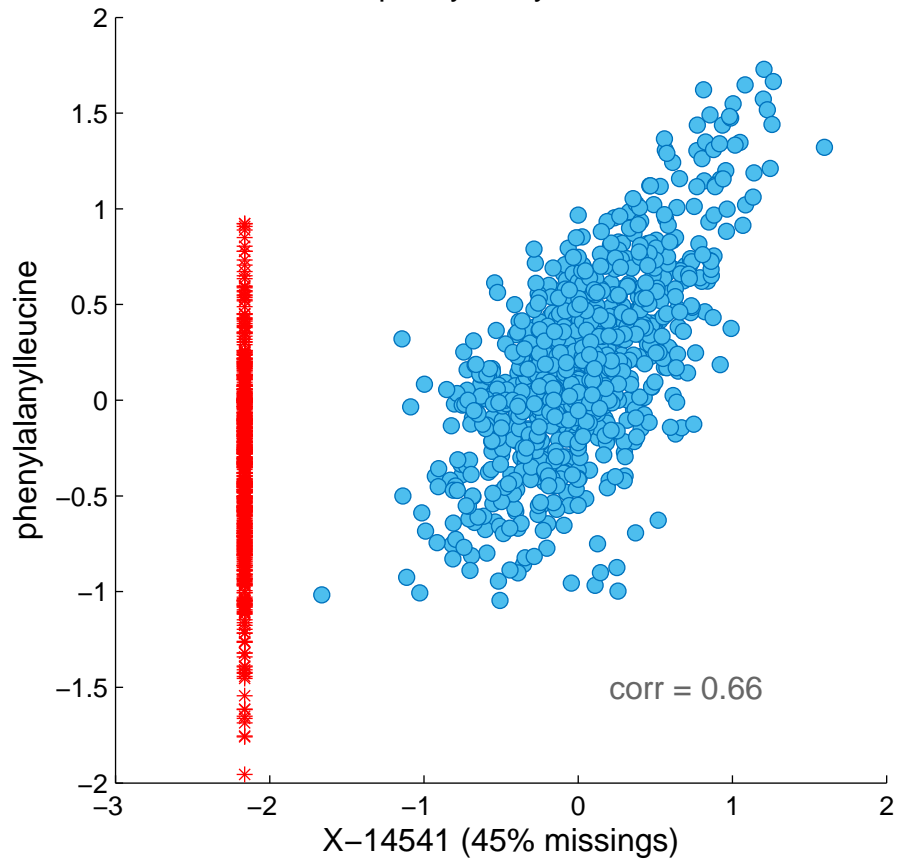

Concentrations of phenylalanylleucine in  
missing and observed X-14541

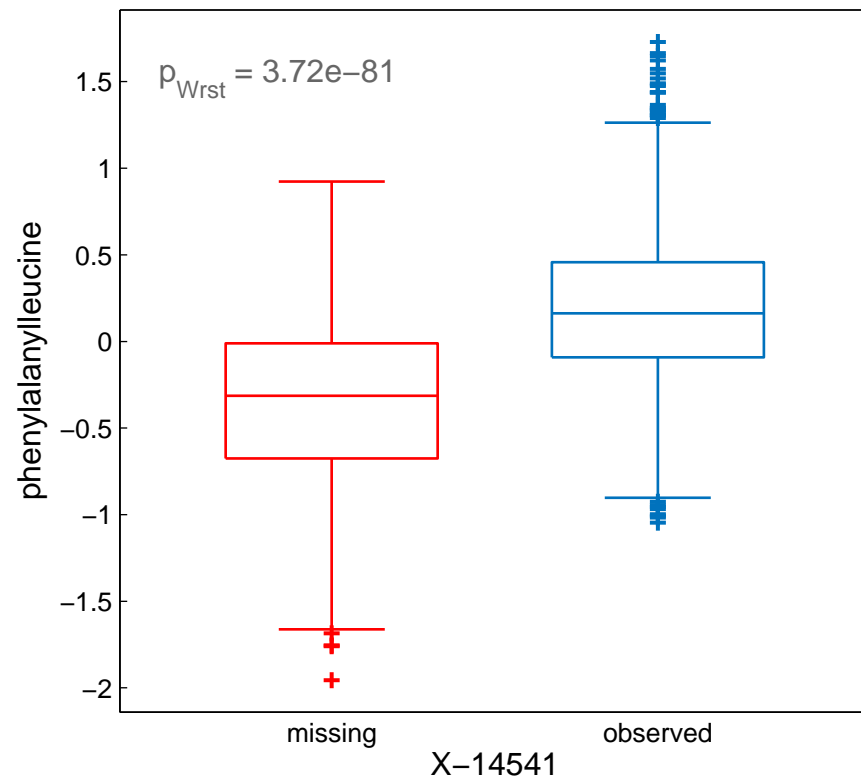

Missing values of X-14626  
in X-13429

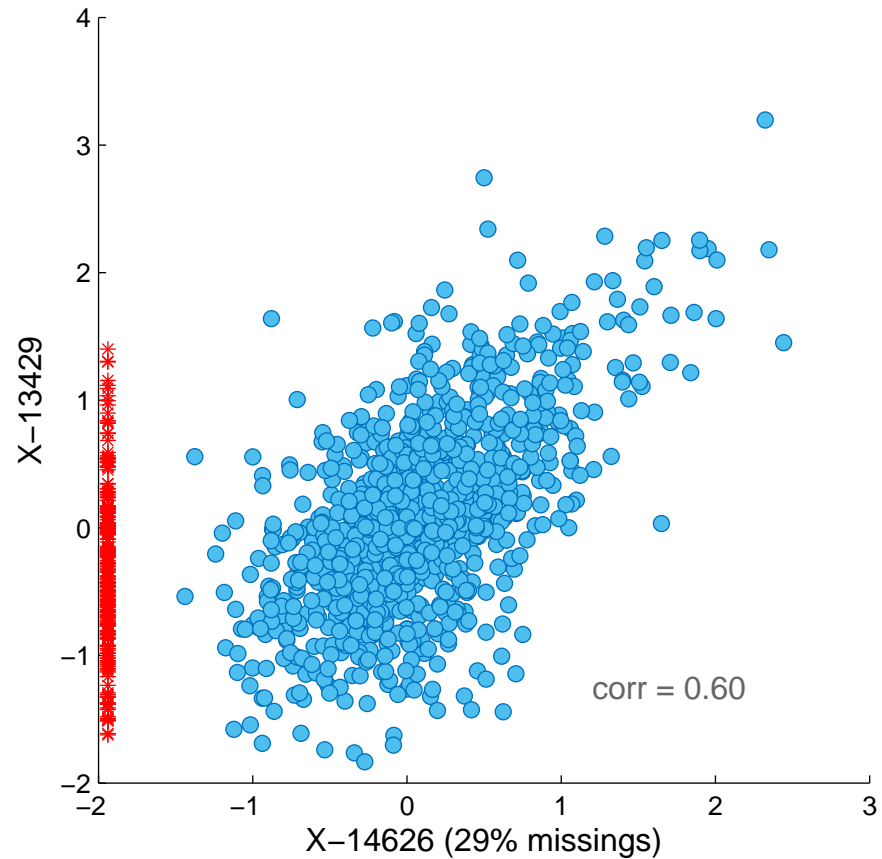

Concentrations of X-13429 in  
missing and observed X-14626

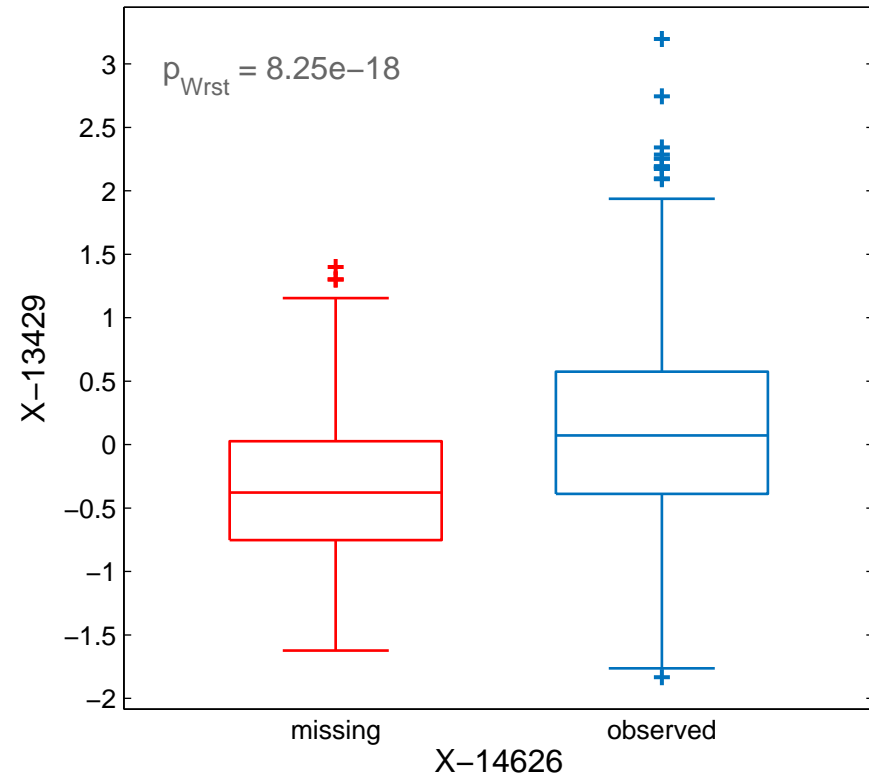

Missing values of X-14632  
in X-14663

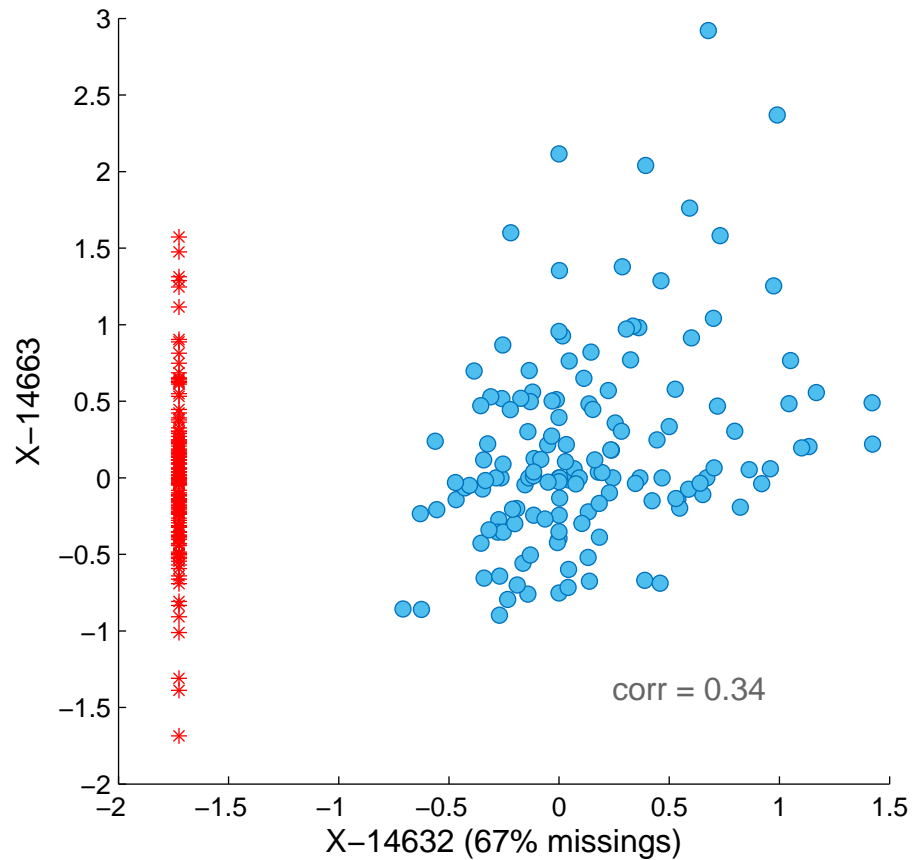

Concentrations of X-14663 in  
missing and observed X-14632

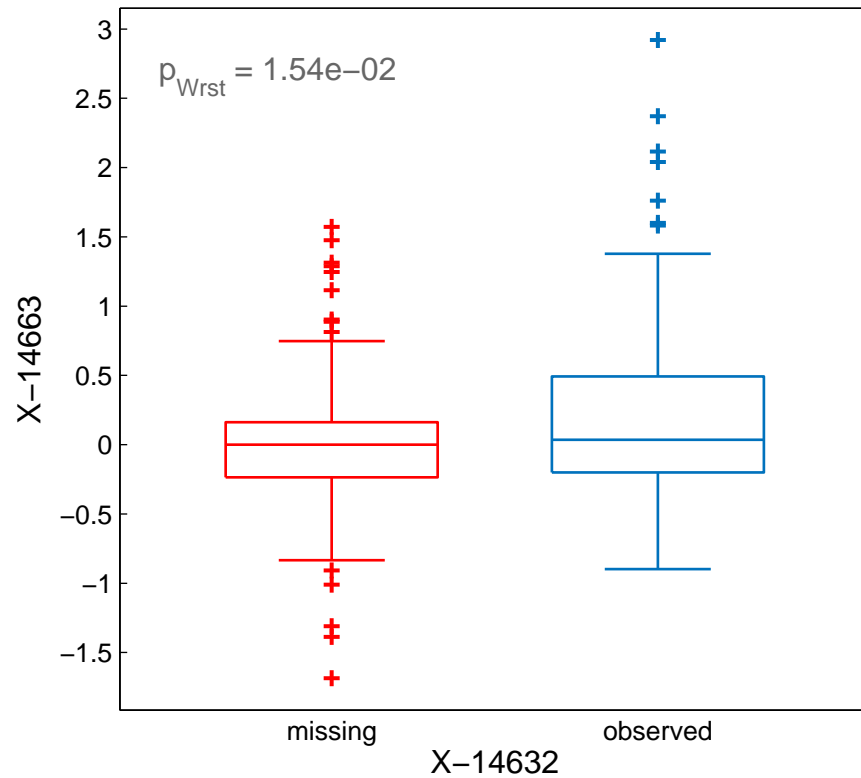



Missing values of X-14658  
in X-12850

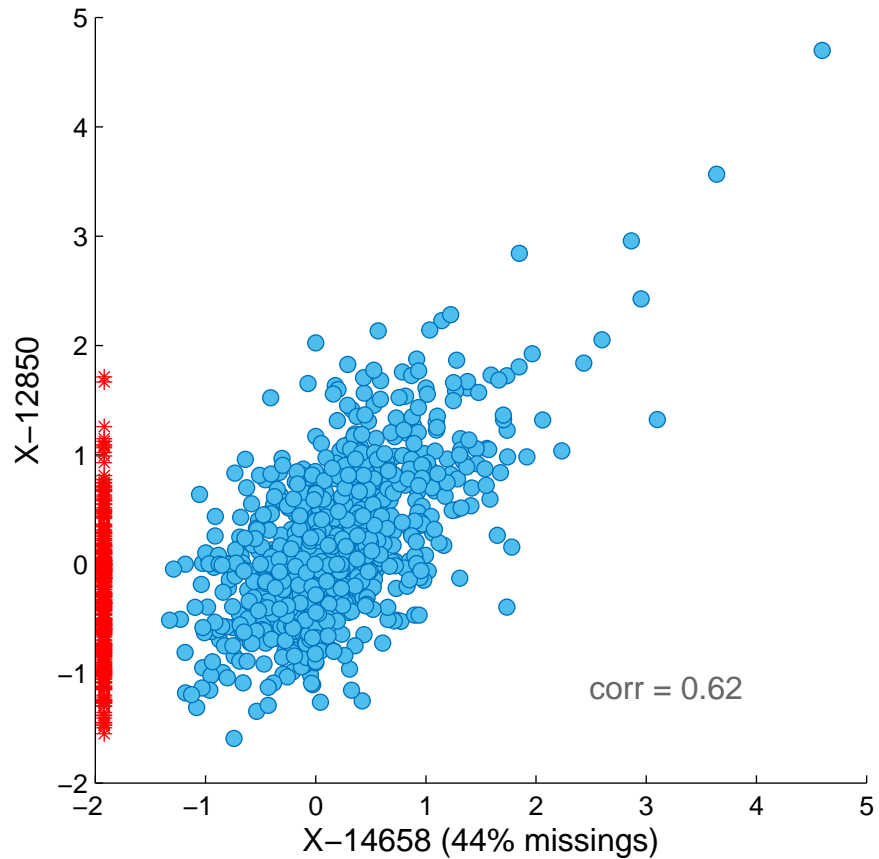

Concentrations of X-12850 in  
missing and observed X-14658

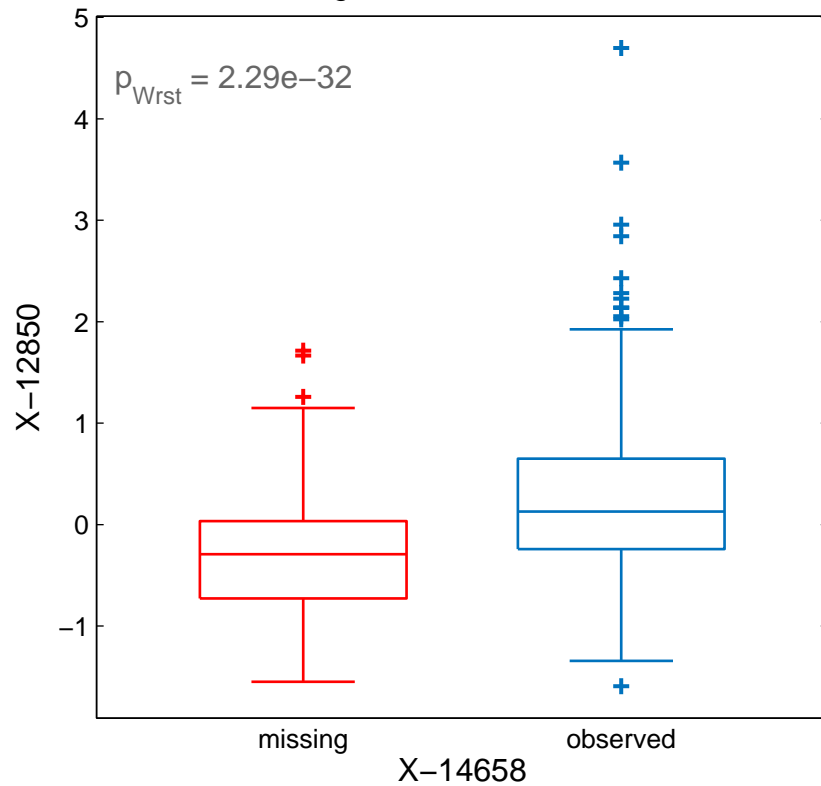

Missing values of X-14662  
in X-14663

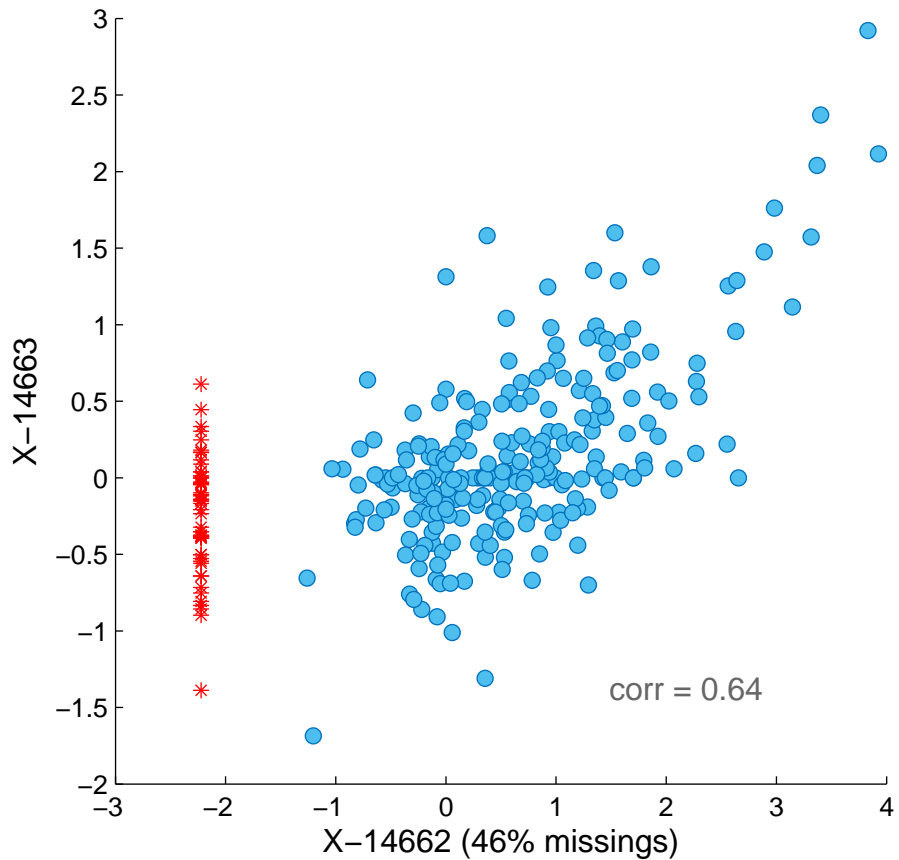

Concentrations of X-14663 in  
missing and observed X-14662

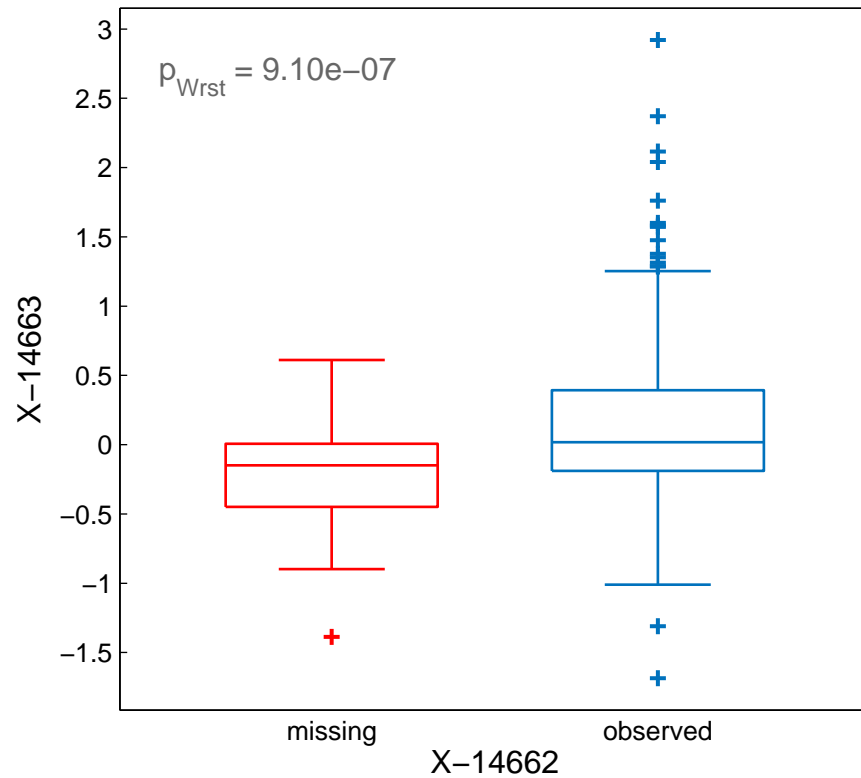

Missing values of X-14663  
in X-14662

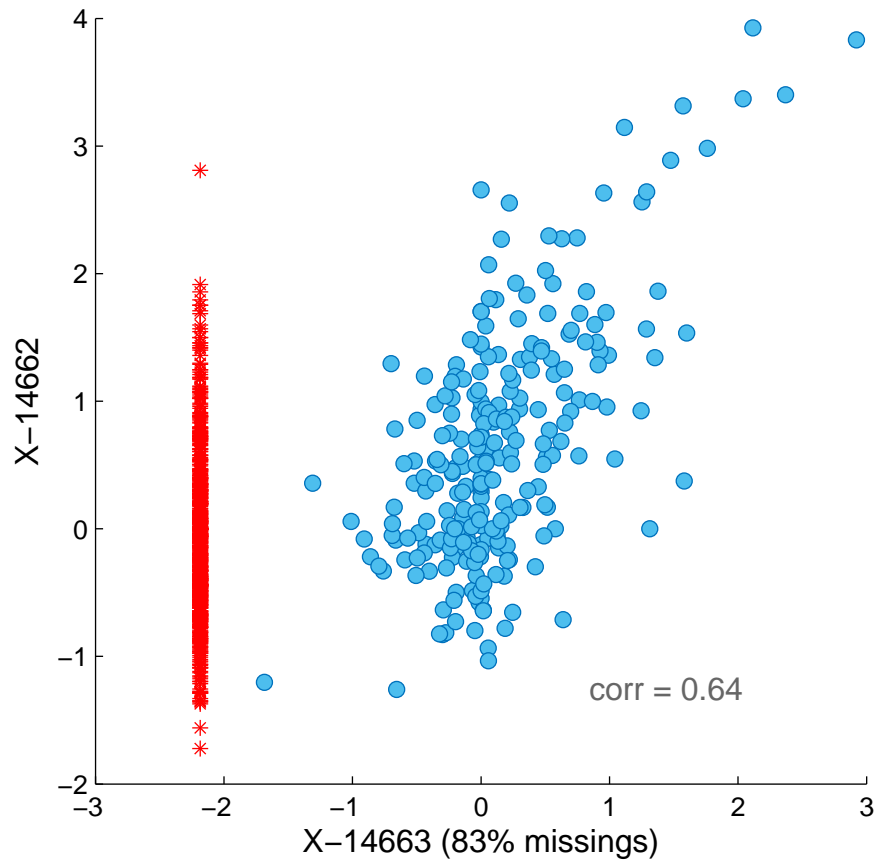

Concentrations of X-14662 in  
missing and observed X-14663

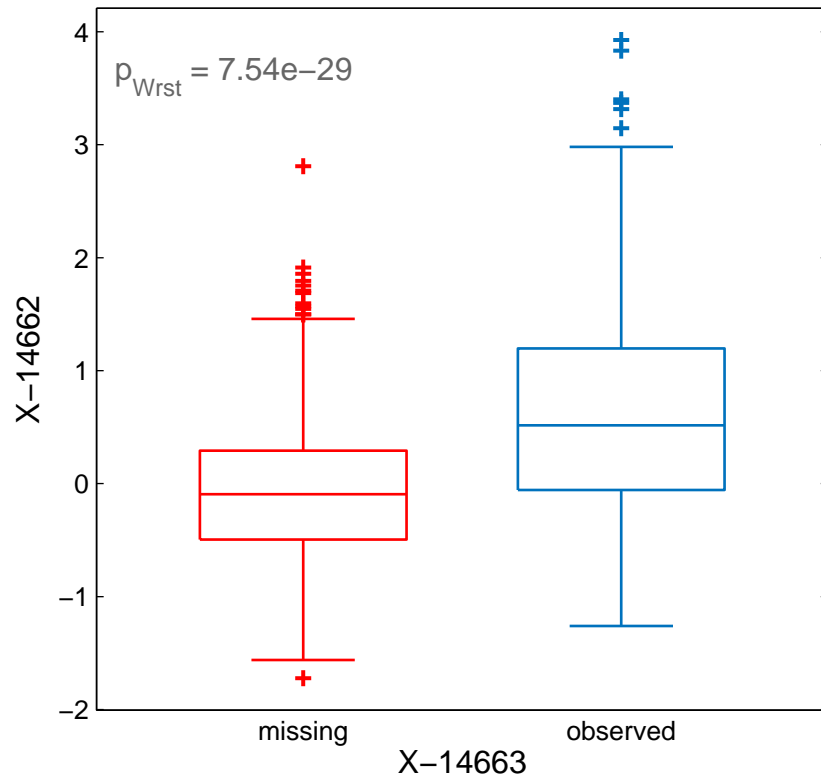

Missing values of X-14745  
in X-13619

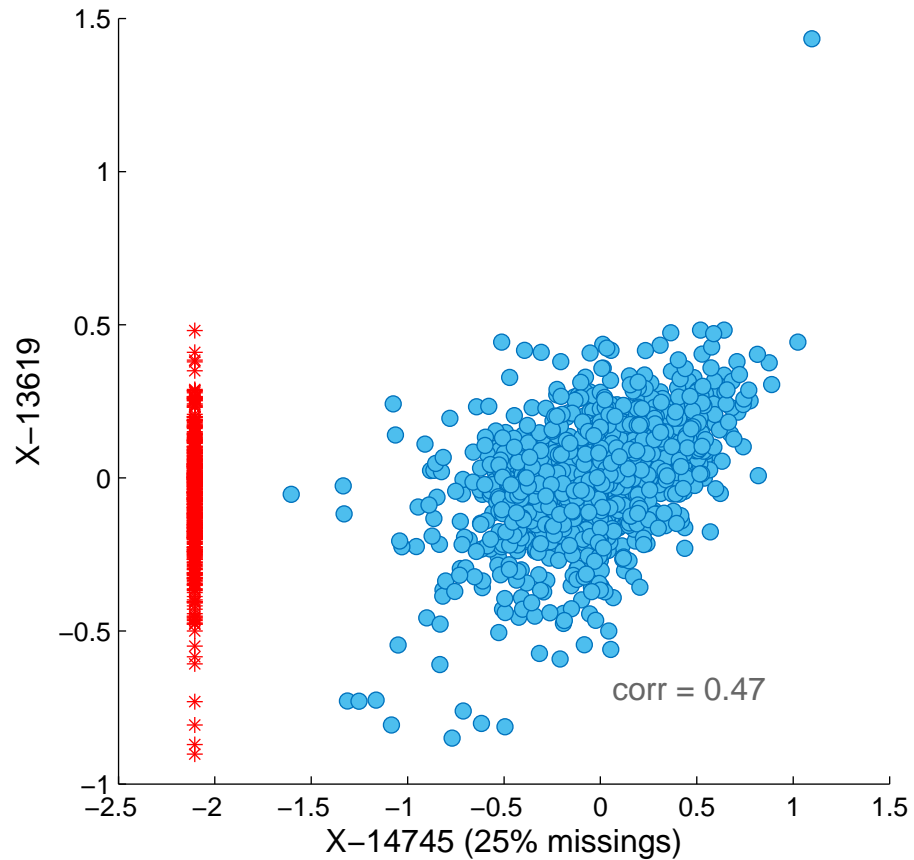

Concentrations of X-13619 in  
missing and observed X-14745

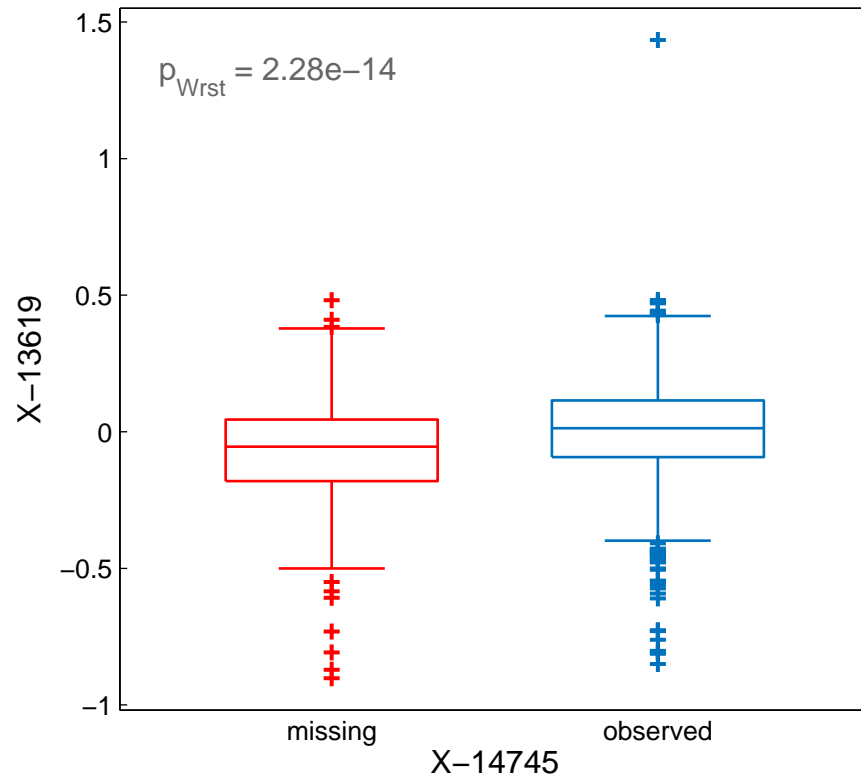

Missing values of 1-eicosadienoylglycerophosphocholine in 1-oleoylglycerophosphocholine

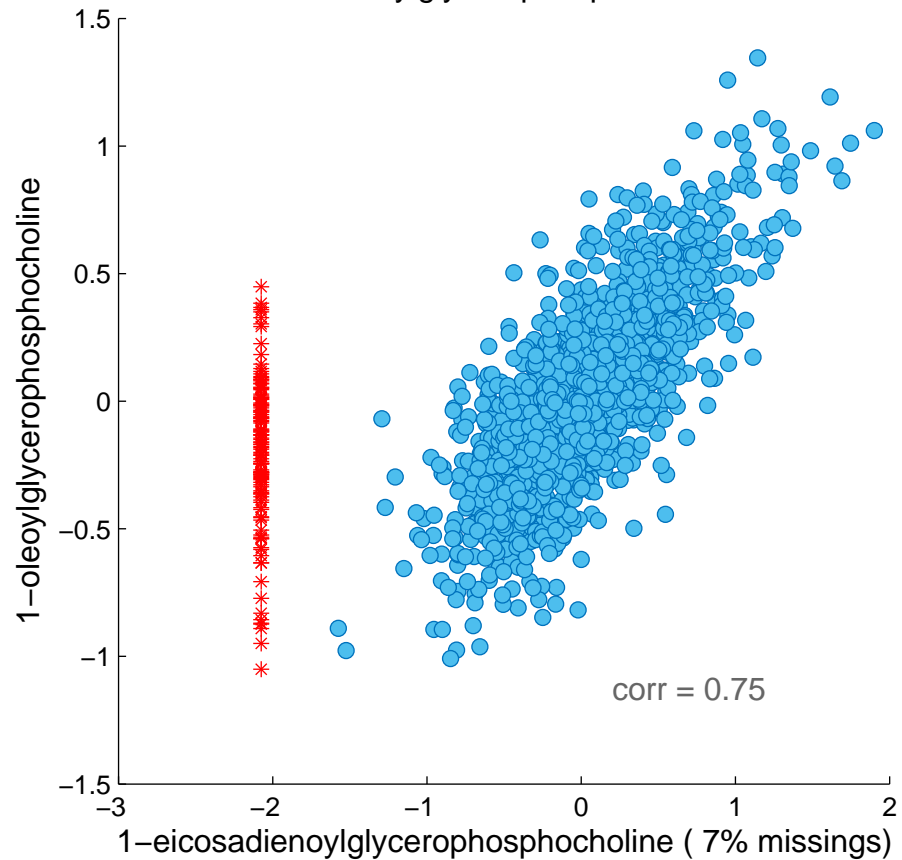

Concentrations of 1-oleoylglycerophosphocholine in missing and observed 1-eicosadienoylglycerophosphocholine

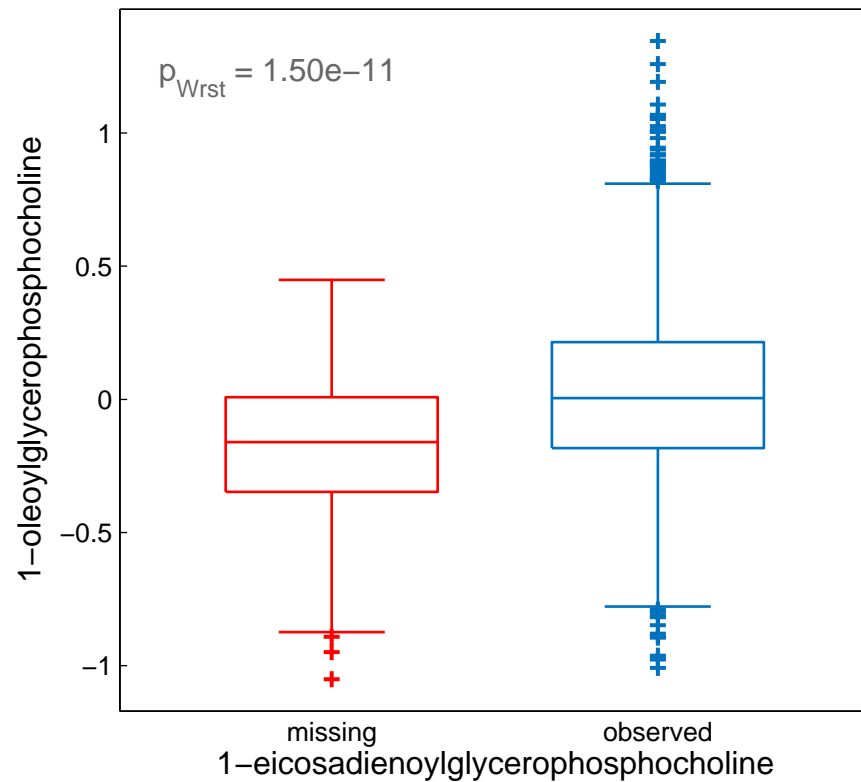

Missing values of 3-hydroxy-2-ethylpropionate  
in X-04495

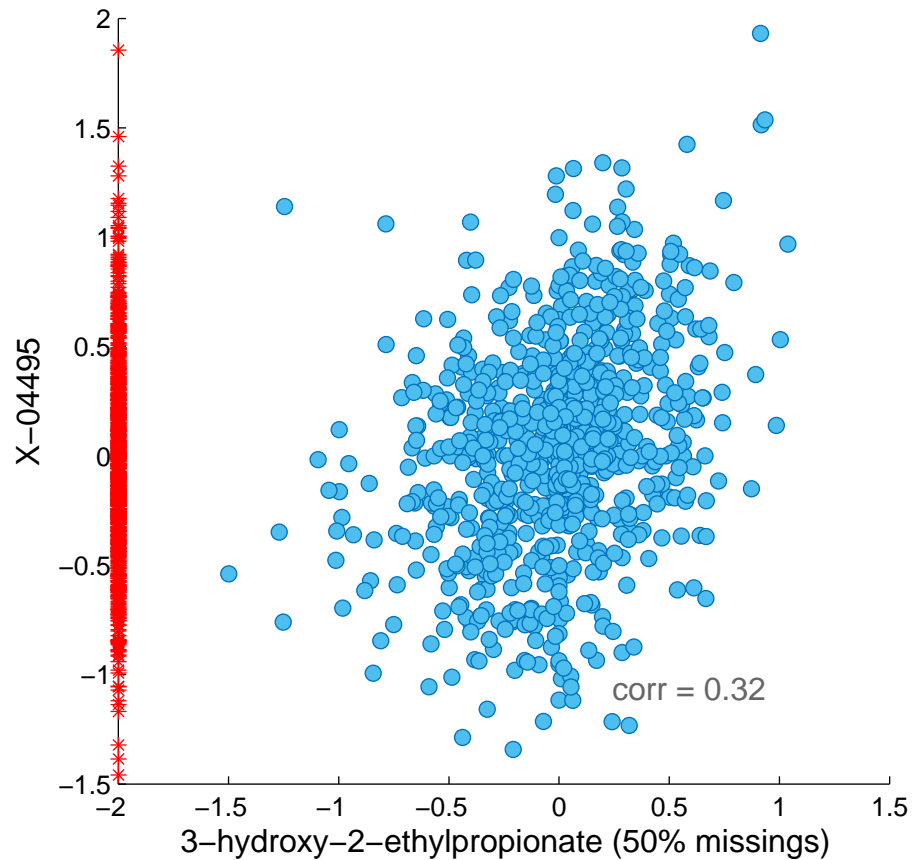

Concentrations of X-04495 in  
missing and observed 3-hydroxy-2-ethylpropionate

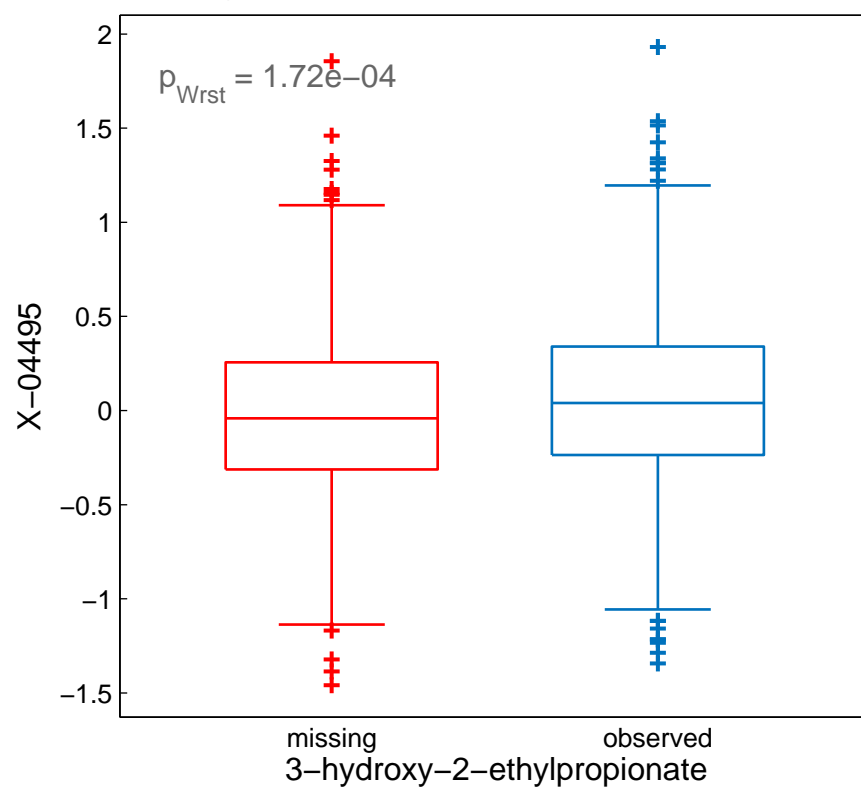

Missing values of 3-methylxanthine  
in 7-methylxanthine

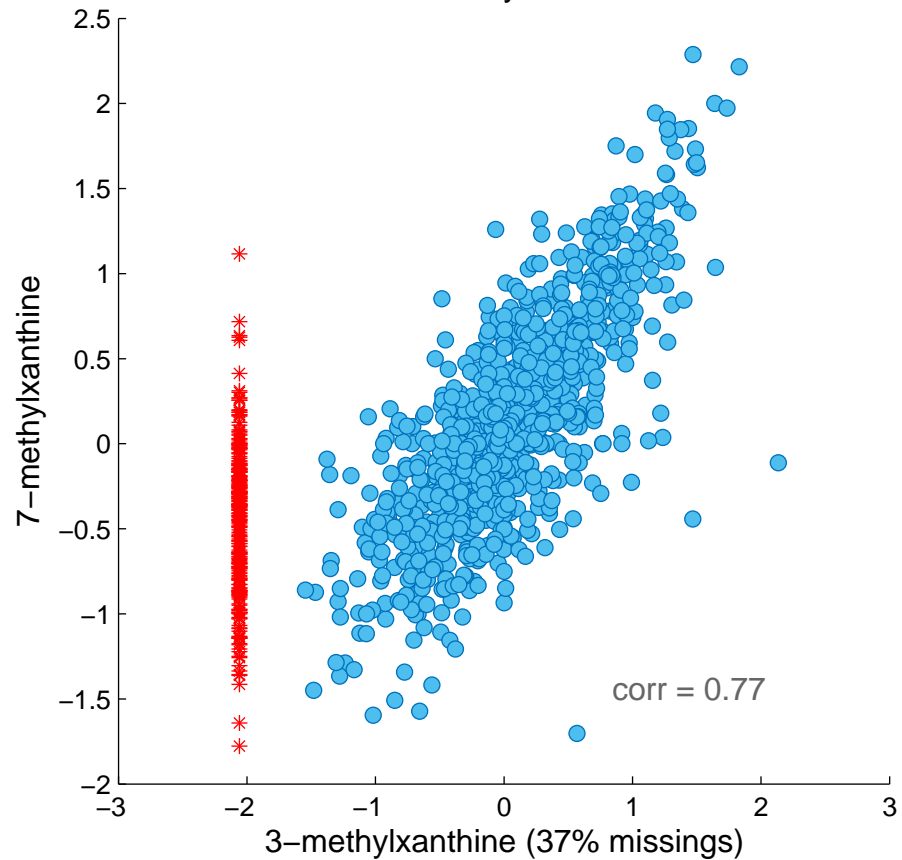

Concentrations of 7-methylxanthine in  
missing and observed 3-methylxanthine

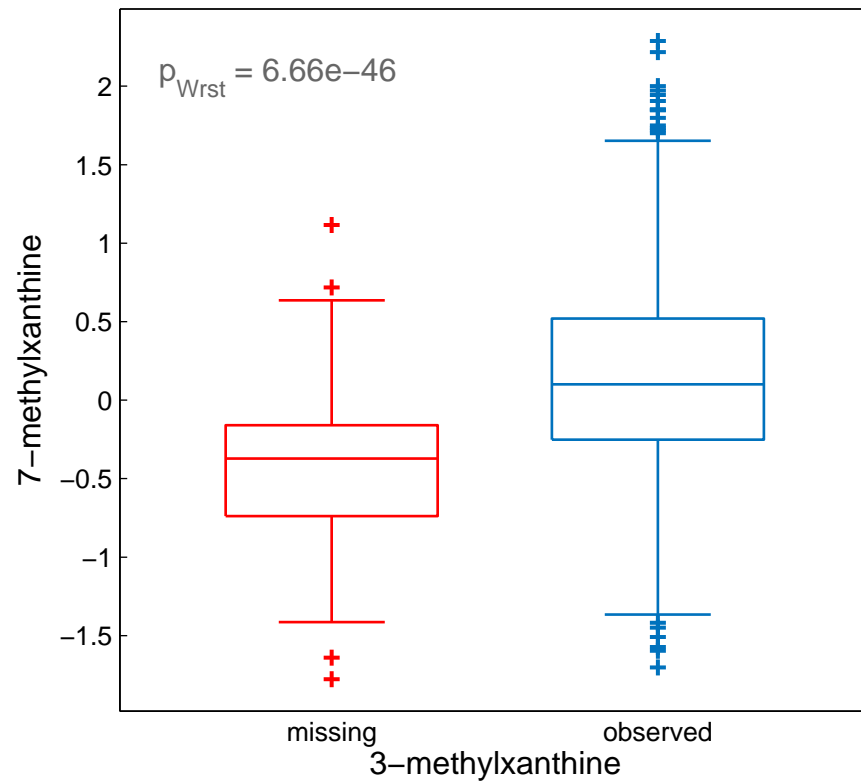

Missing values of 3-phenylpropionate (hydrocinnamate) in hippurate

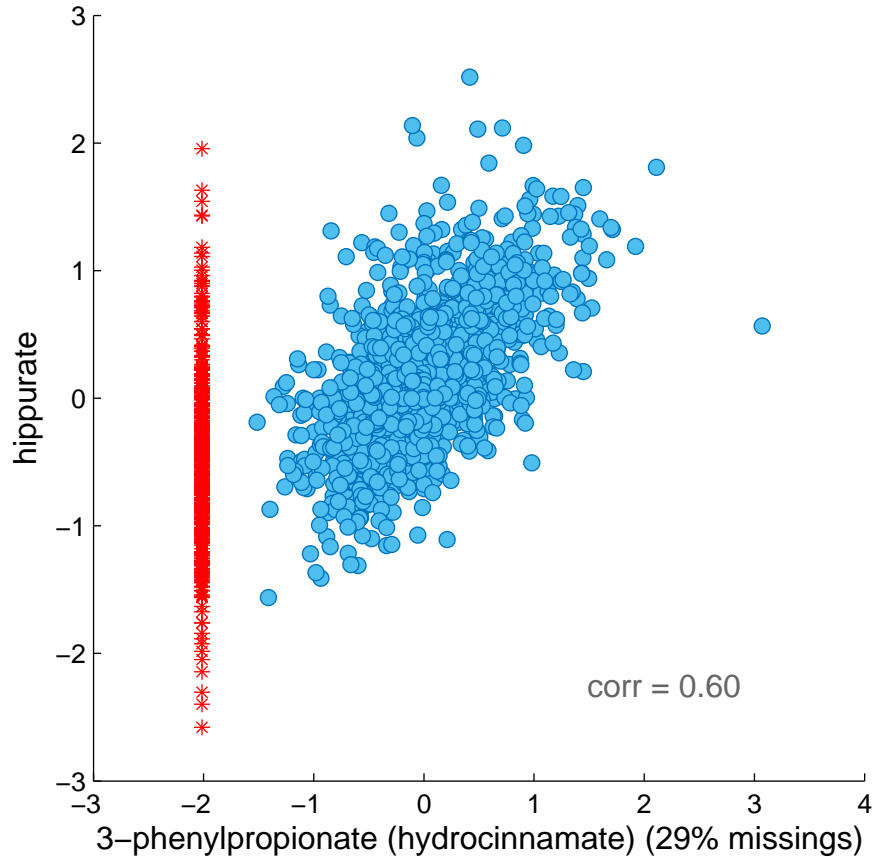

Concentrations of hippurate in missing and observed 3-phenylpropionate (hydrocinnamate)

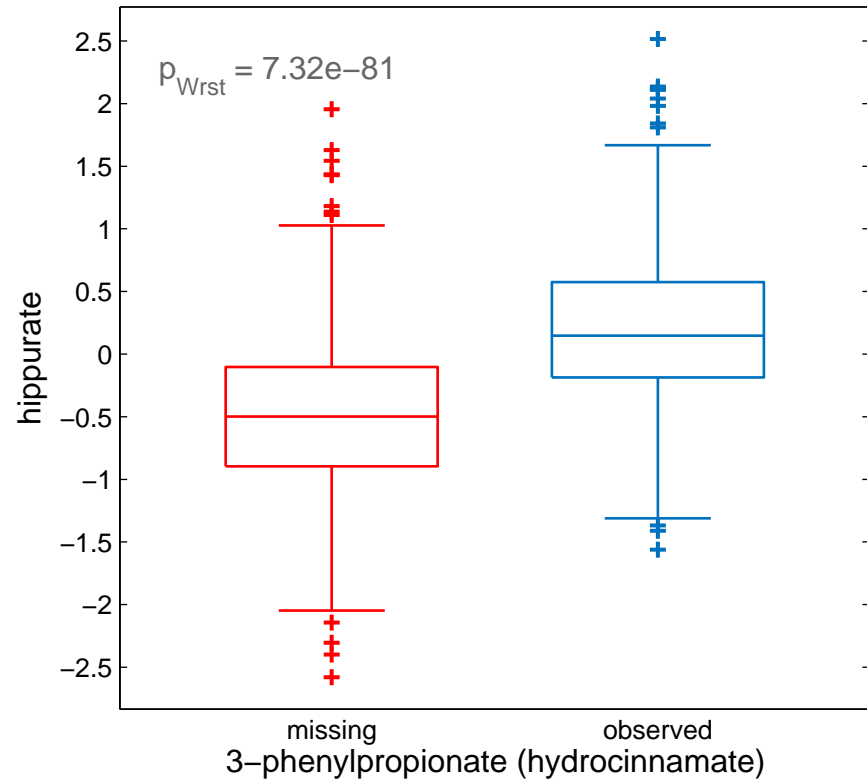



Missing values of 4-acetamidobutanoate  
in C-glycosyltryptophan

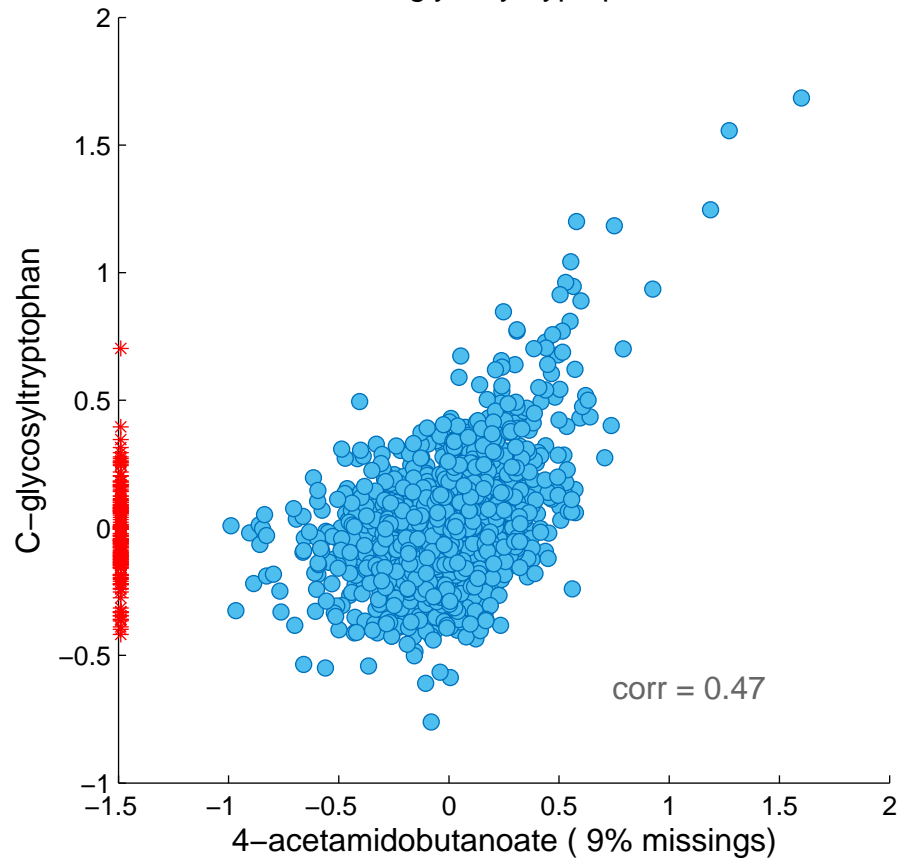

Concentrations of C-glycosyltryptophan in  
missing and observed 4-acetamidobutanoate

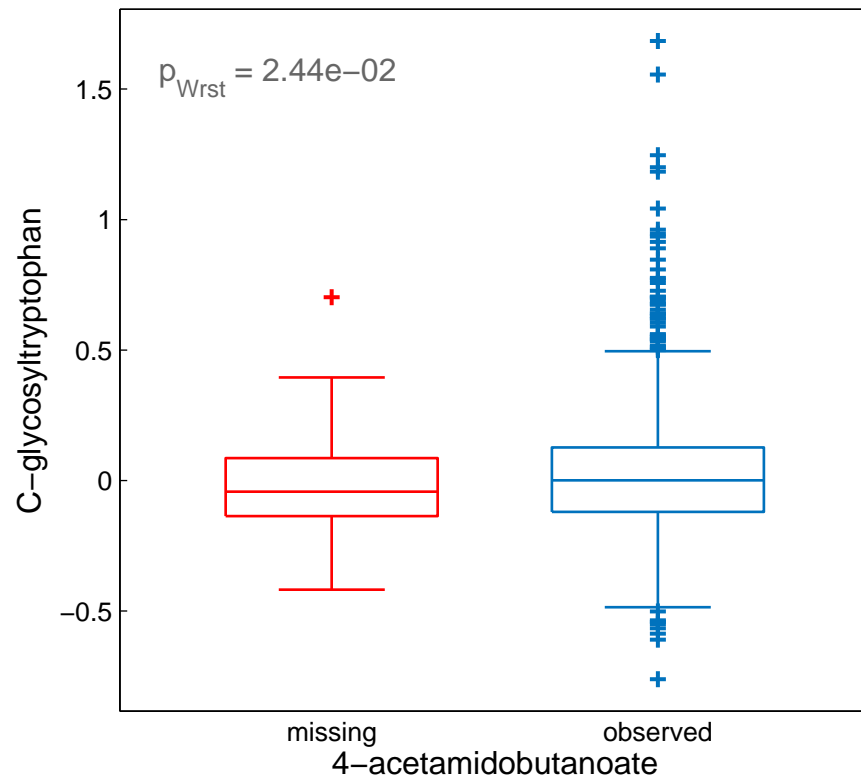

Missing values of 4-ethylphenylsulfate  
in X-12230

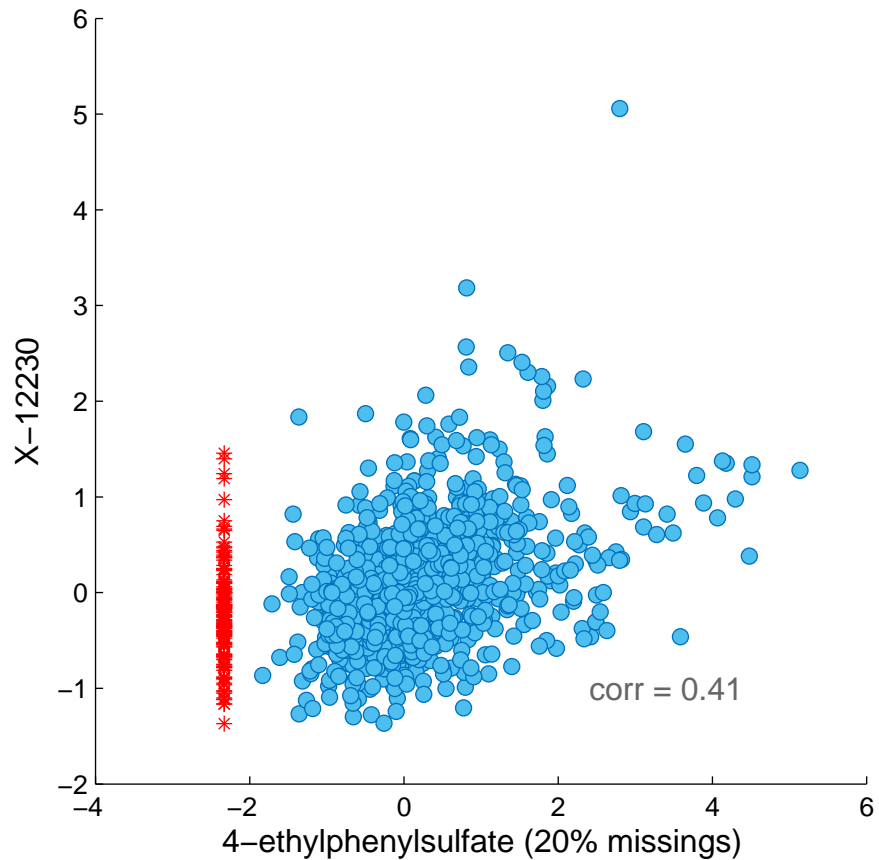

Concentrations of X-12230 in  
missing and observed 4-ethylphenylsulfate

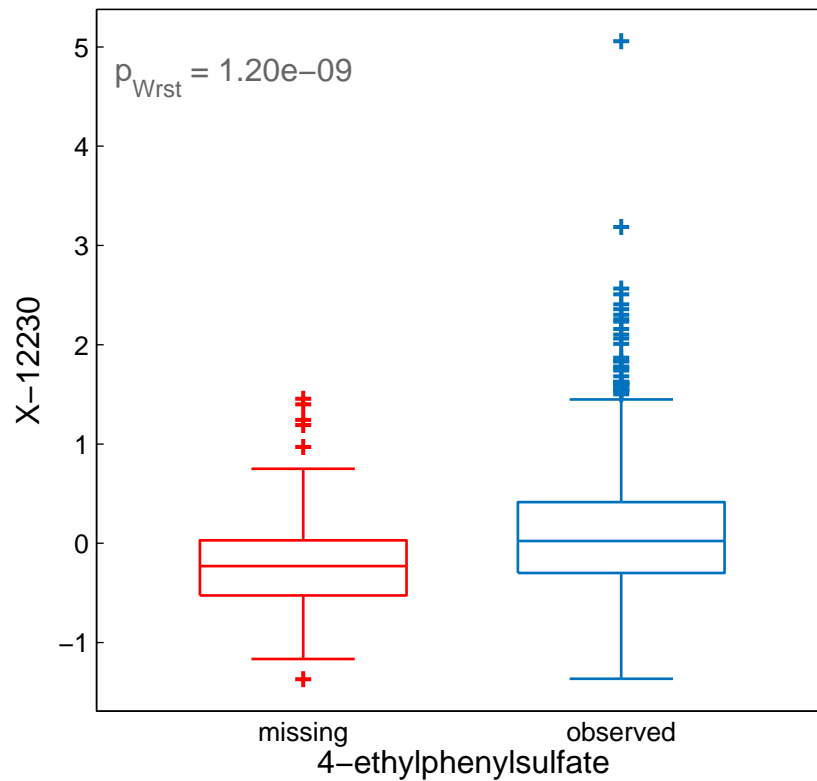

Missing values of 4-hydroxyphenylacetate  
in erythronate

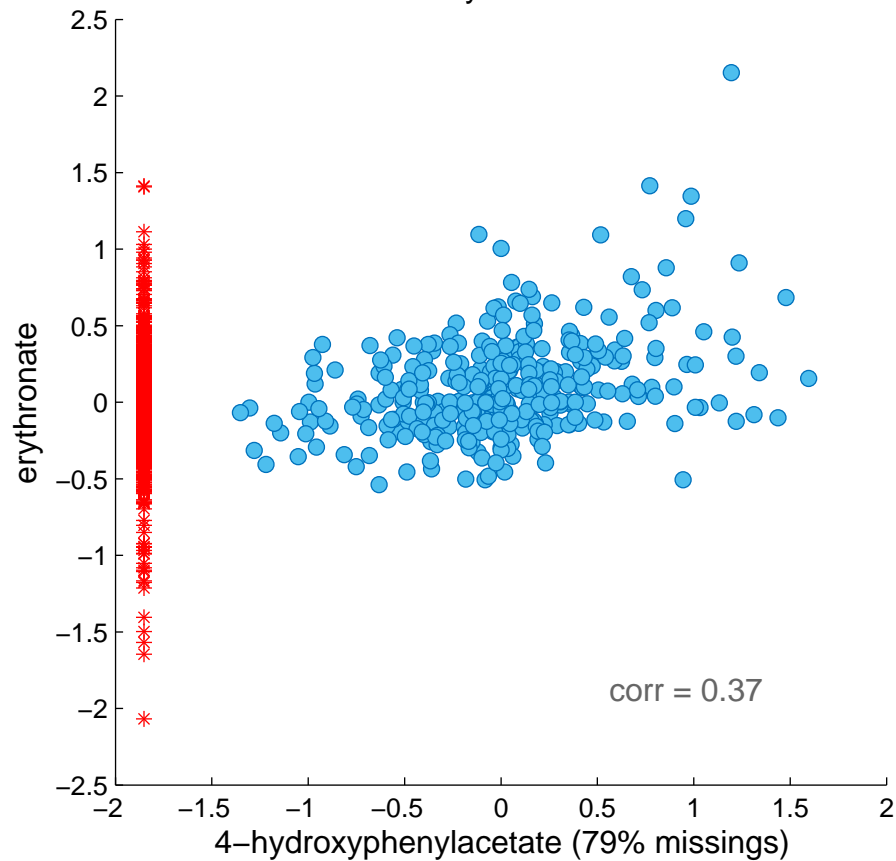

Concentrations of erythronate in  
missing and observed 4-hydroxyphenylacetate

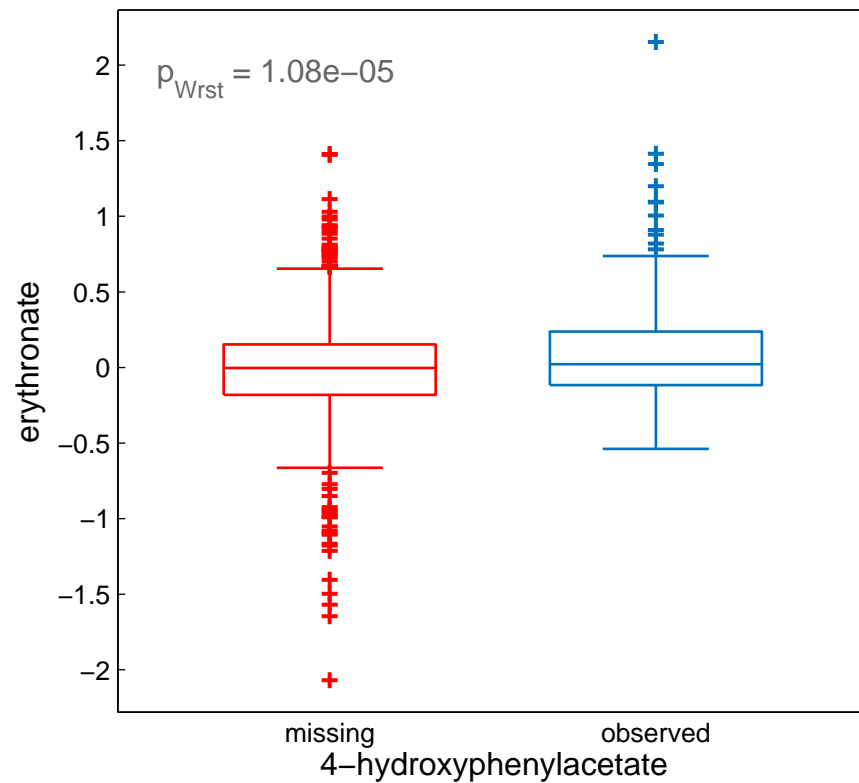

Missing values of 4-vinylphenol sulfate  
in cotinine

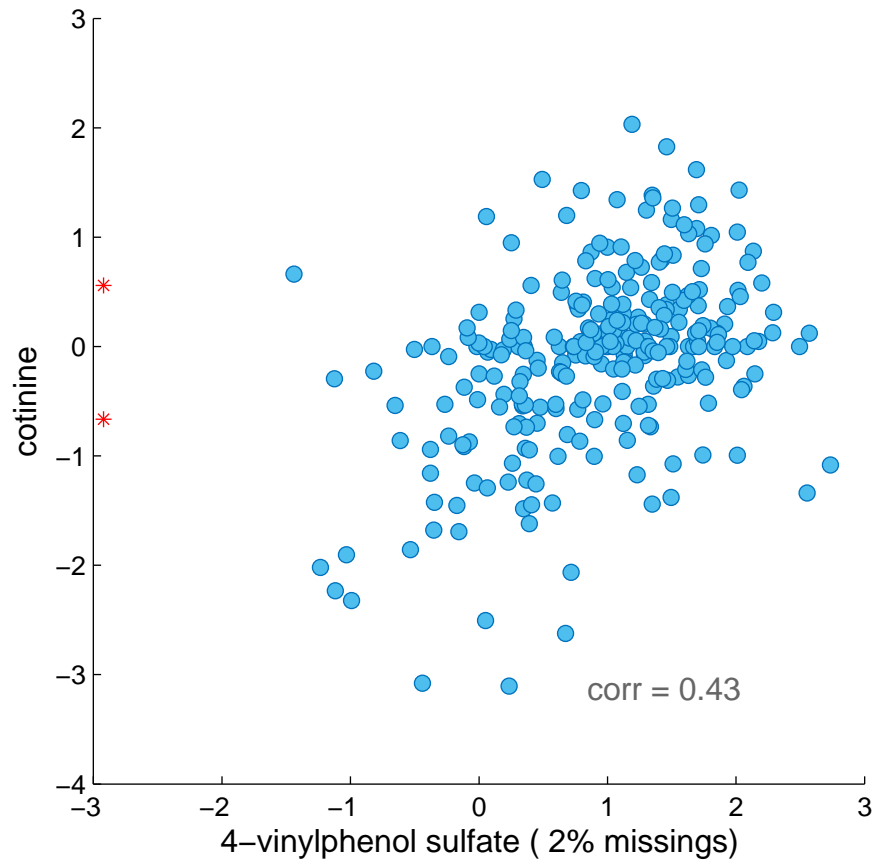

Concentrations of cotinine in  
missing and observed 4-vinylphenol sulfate

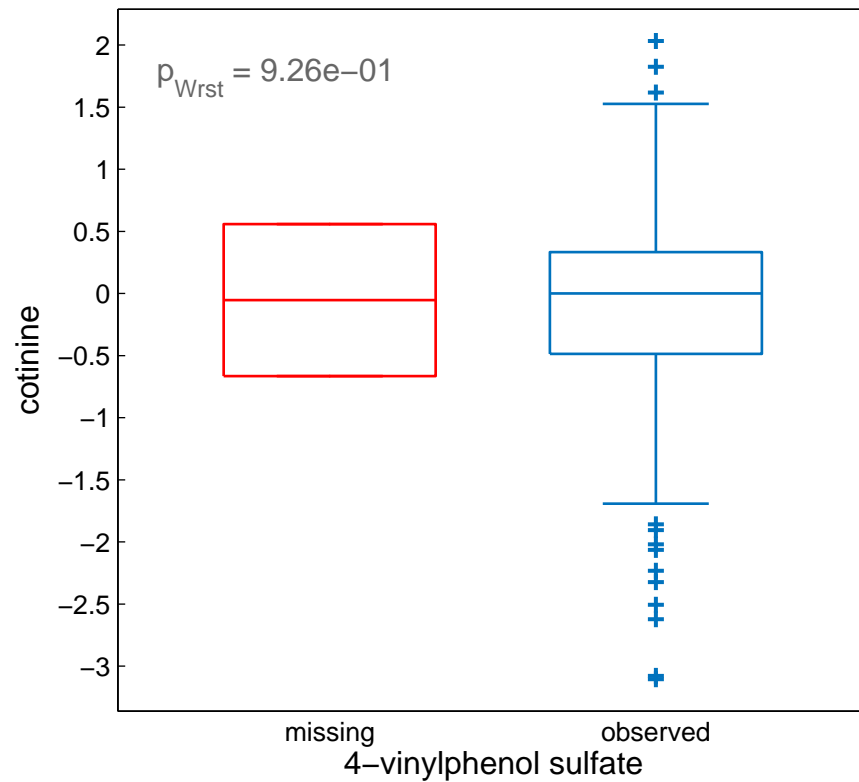

Missing values of 5-dodecenoate (12:1n7)  
in myristoleate (14:1n5)

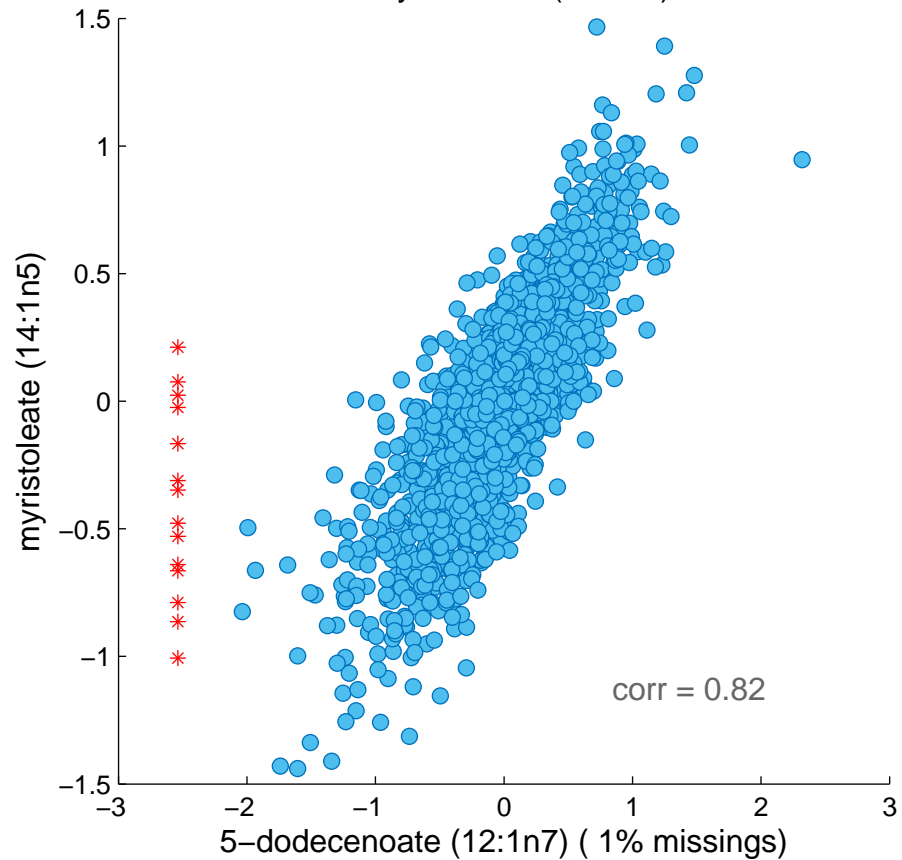

Concentrations of myristoleate (14:1n5) in  
missing and observed 5-dodecenoate (12:1n7)

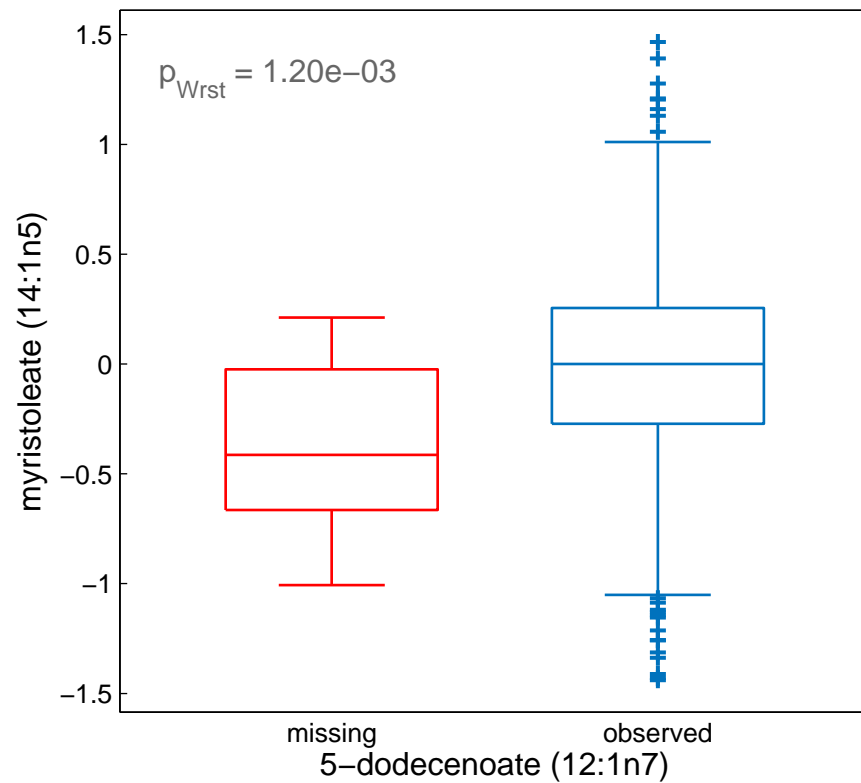

Missing values of 7-methylxanthine  
in 3-methylxanthine

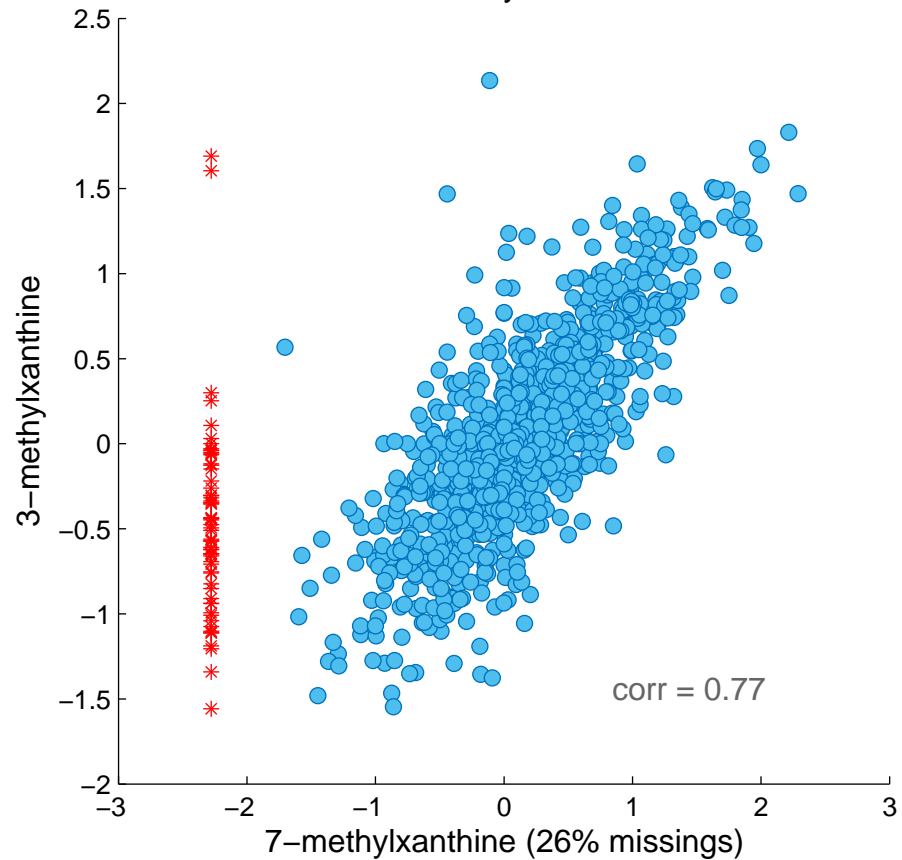

Concentrations of 3-methylxanthine in  
missing and observed 7-methylxanthine

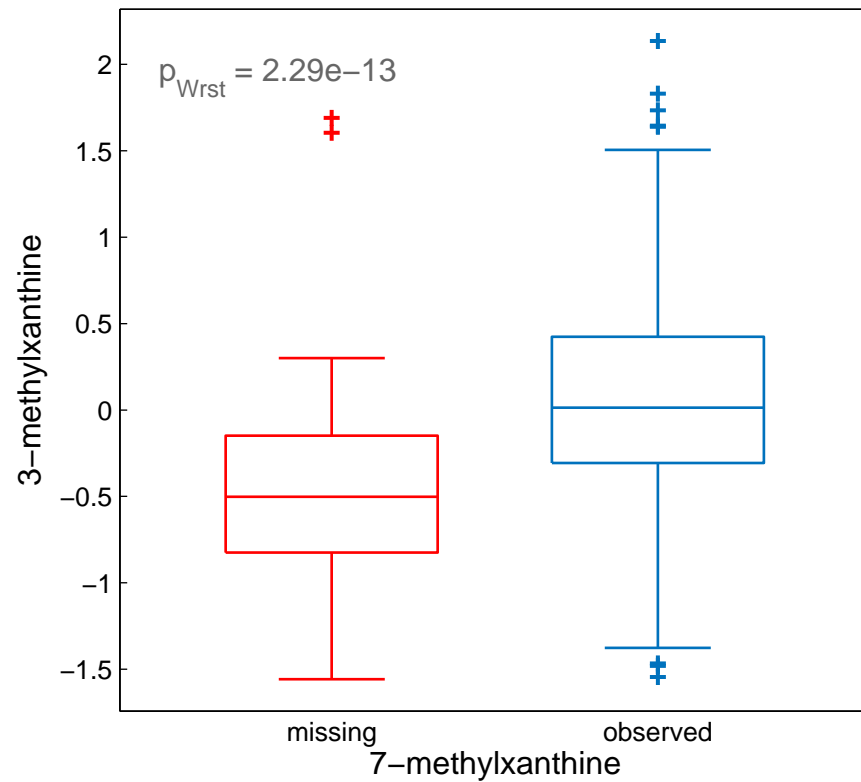

Missing values of 1-heptadecanoylglycerophosphocholine in 2-stearoylglycerophosphocholine

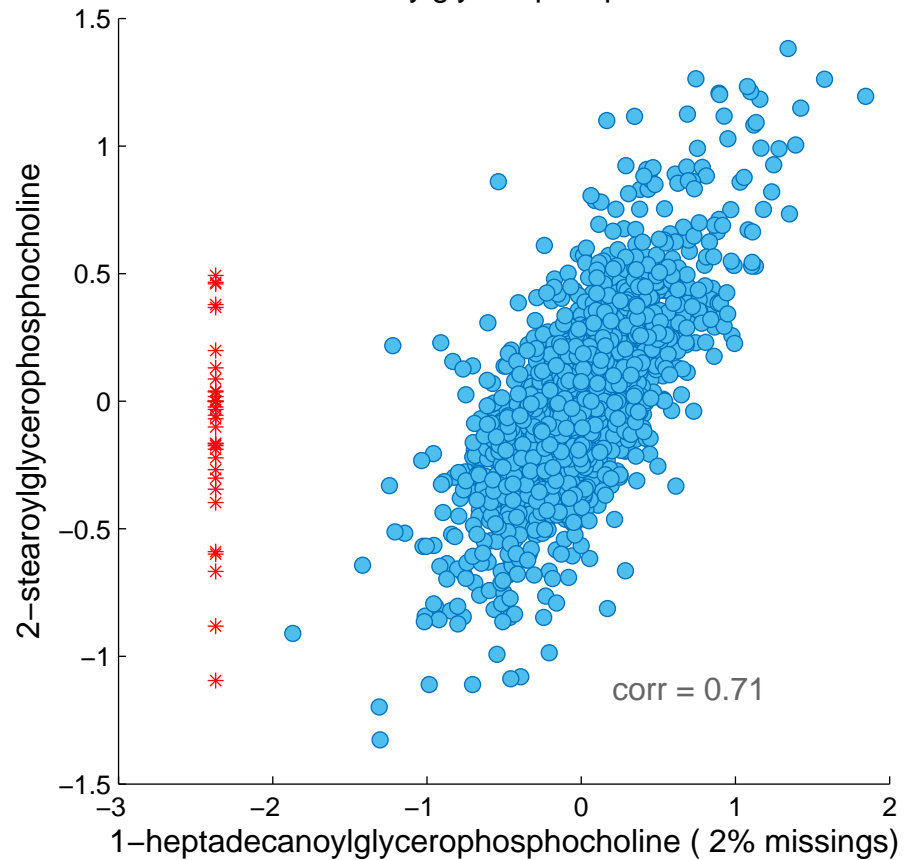

Concentrations of 2-stearoylglycerophosphocholine in missing and observed 1-heptadecanoylglycerophosphocholine

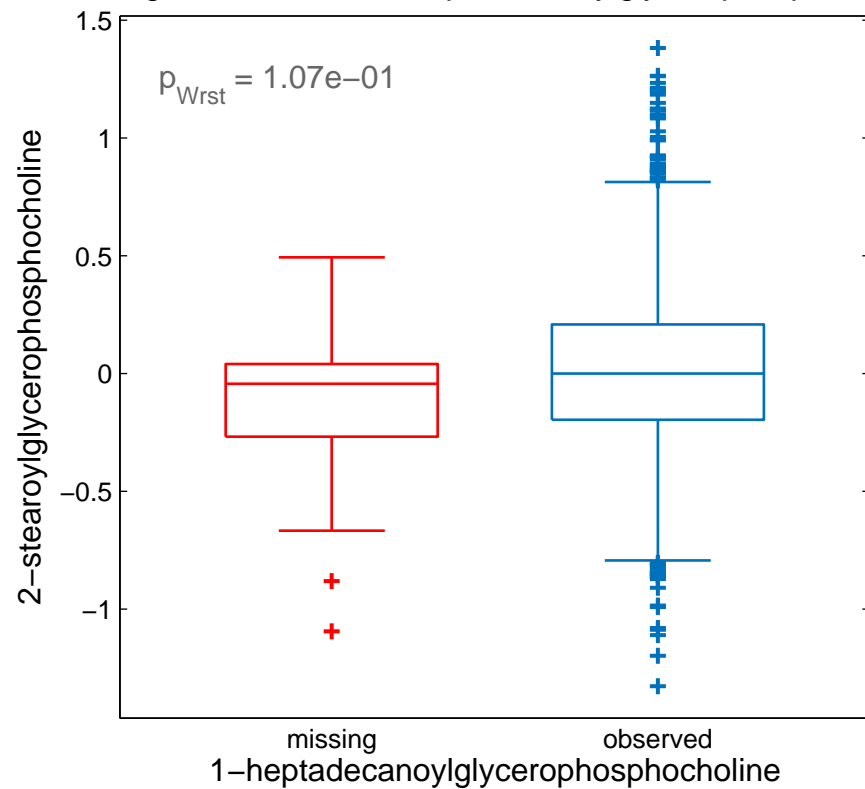

Missing values of adenosine  
in inosine

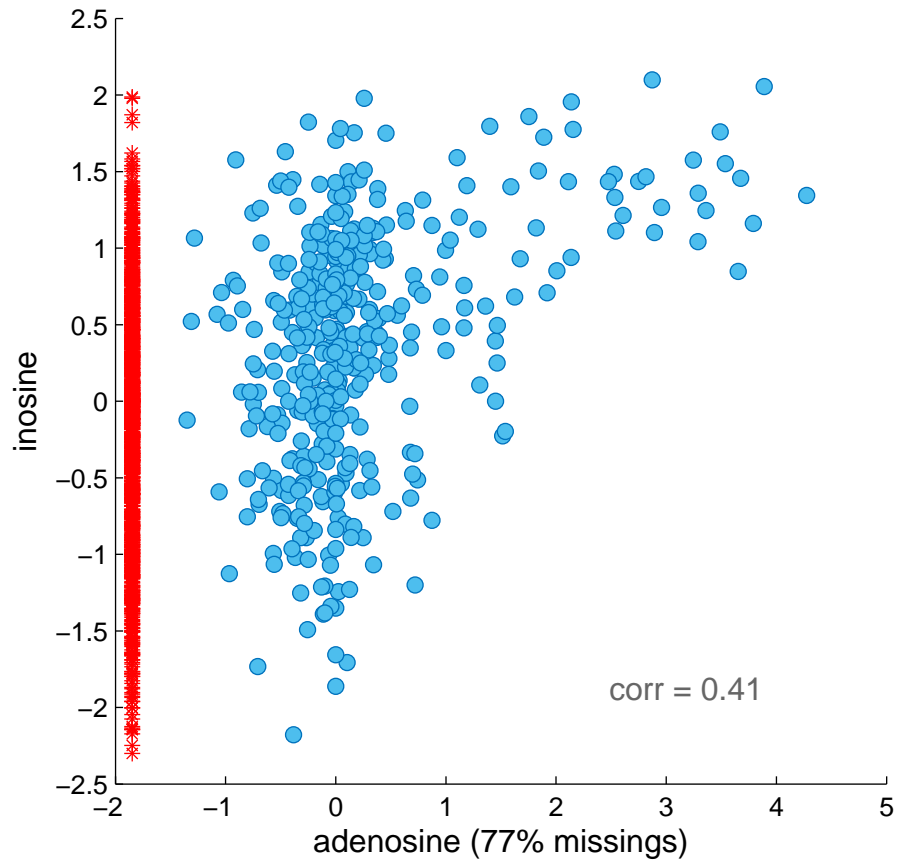

Concentrations of inosine in  
missing and observed adenosine

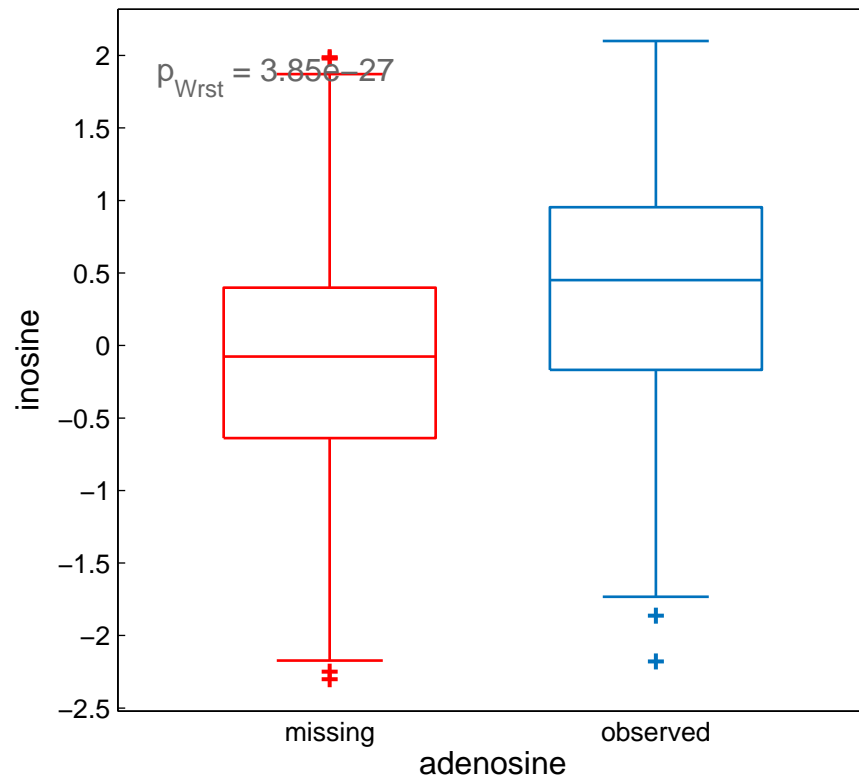



Missing values of ADpSGEGDFXAEGGGVR  
in DSGEGDFXAEGGGVR

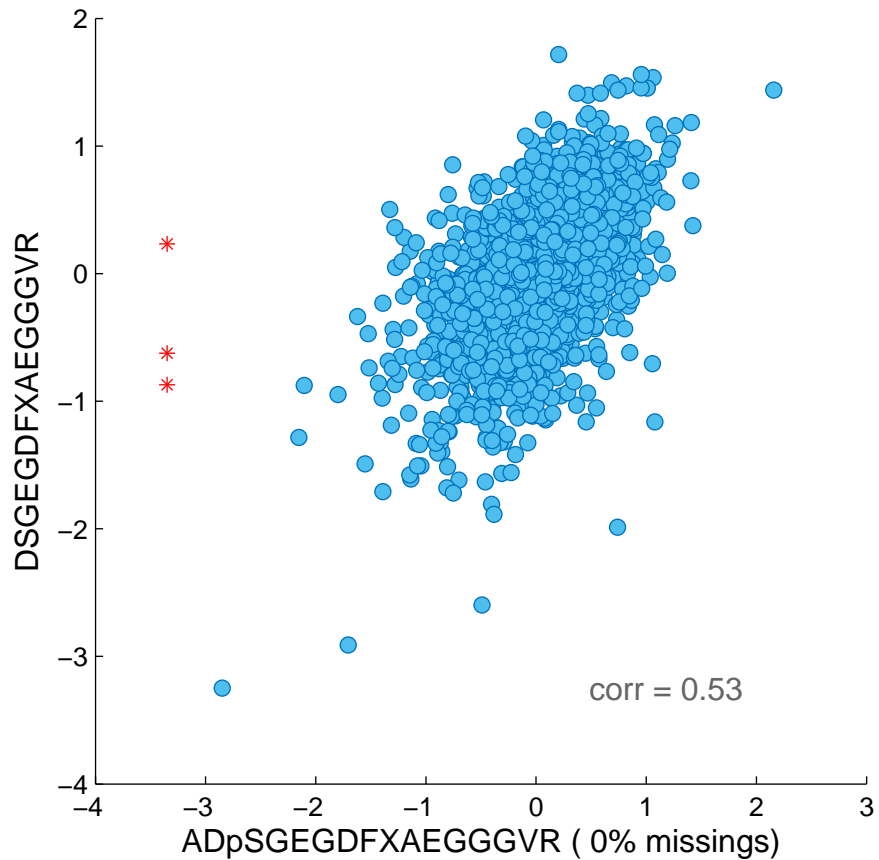

Concentrations of DSGEGDFXAEGGGVR in  
missing and observed ADpSGEGDFXAEGGGVR

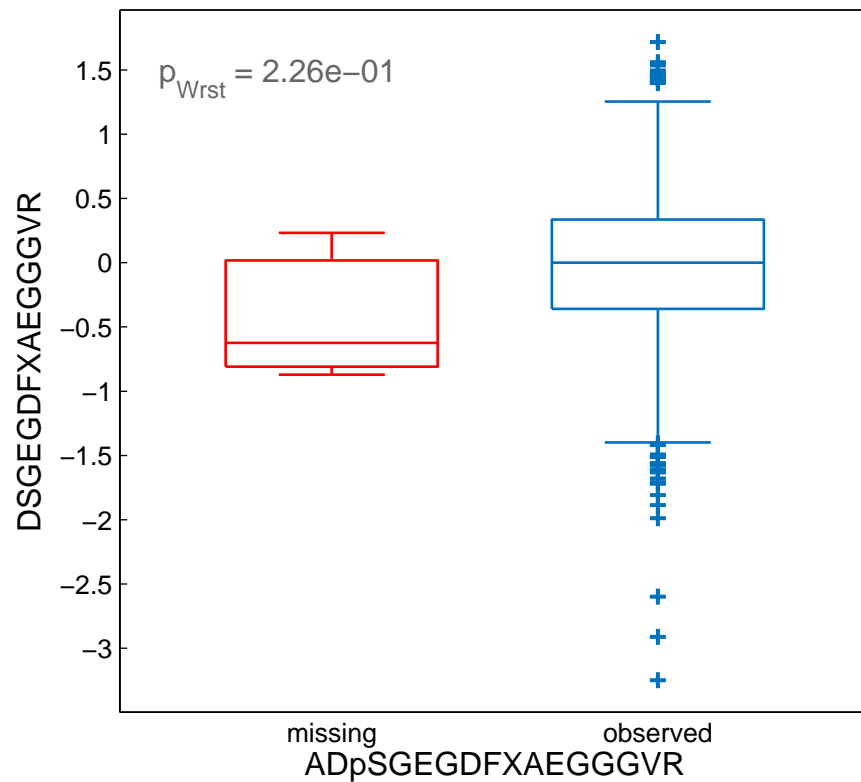

Missing values of allantoin  
in X-04498

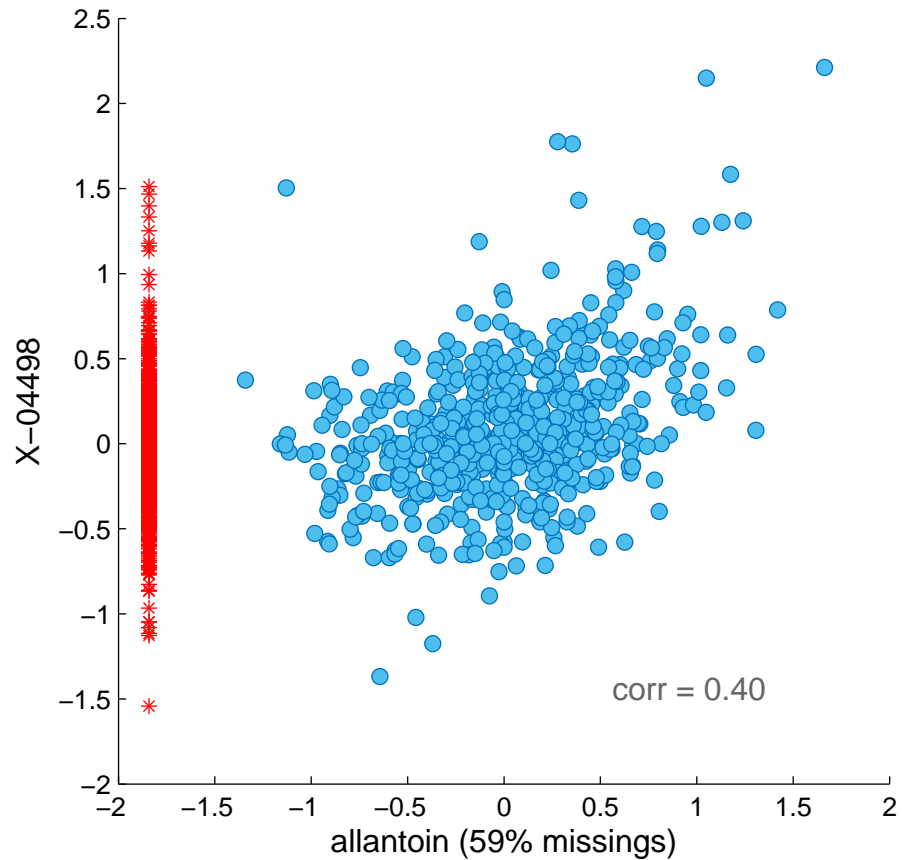

Concentrations of X-04498 in  
missing and observed allantoin

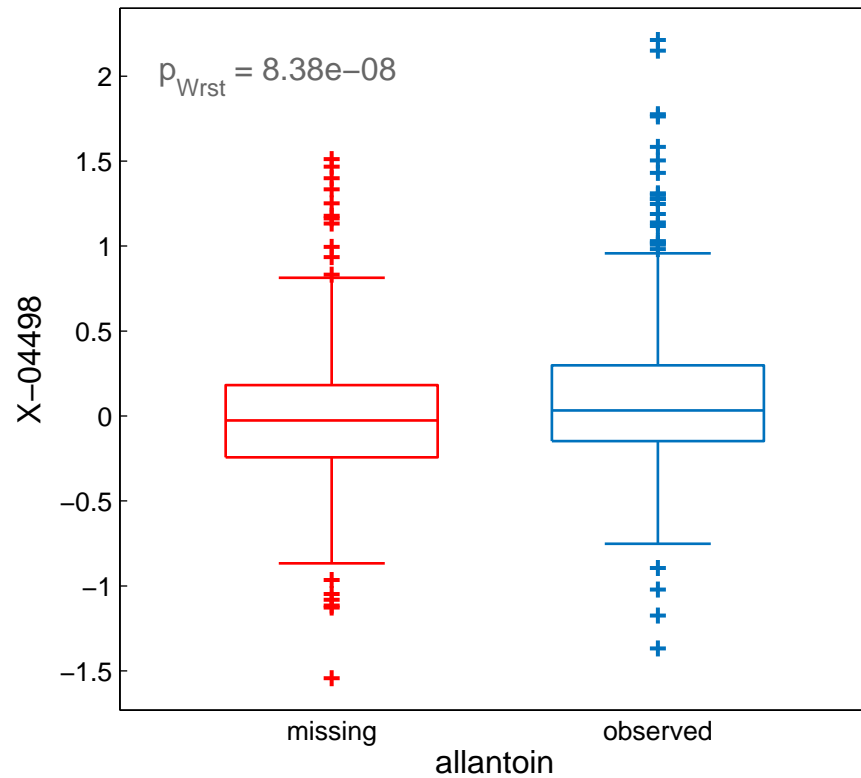

Missing values of alpha-ketoglutarate  
in pyruvate

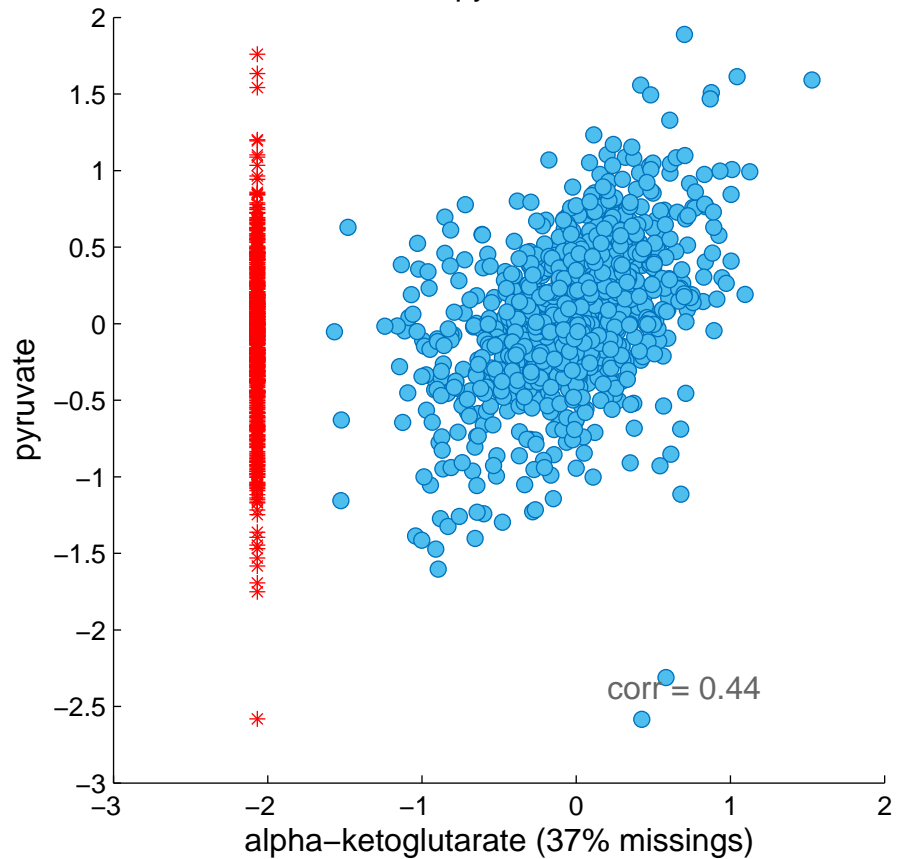

Concentrations of pyruvate in  
missing and observed alpha-ketoglutarate

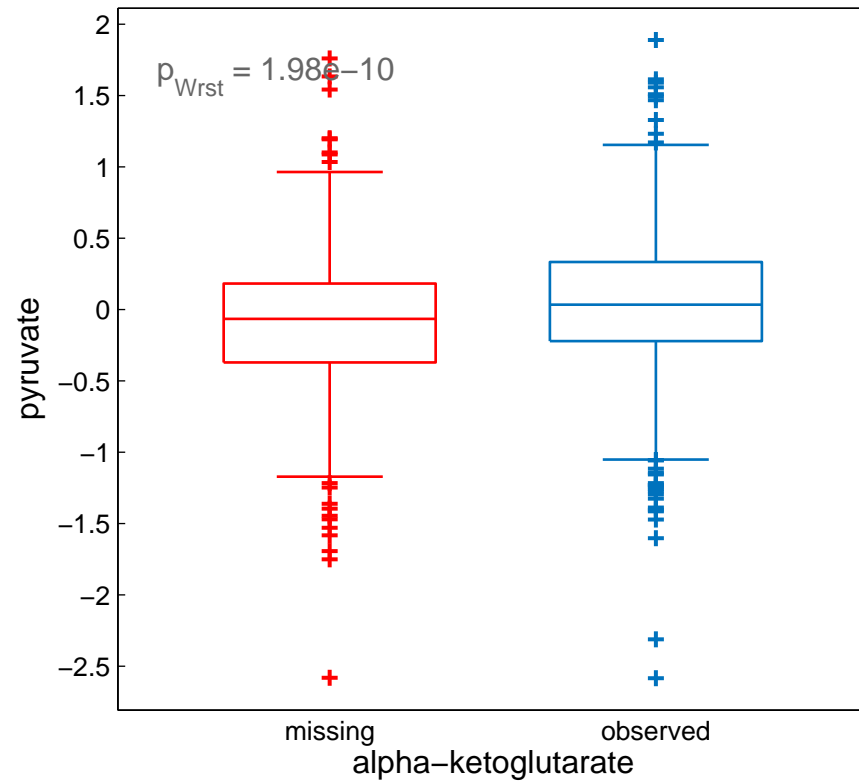

Missing values of alpha-tocopherol  
in cholesterol

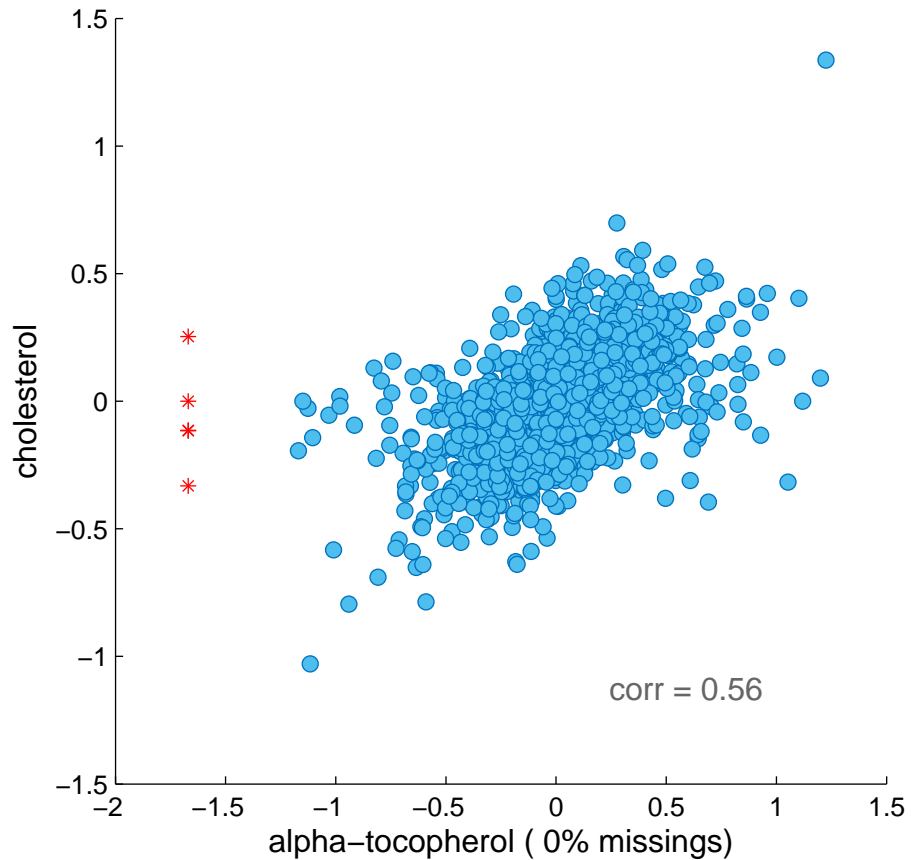

Concentrations of cholesterol in  
missing and observed alpha-tocopherol

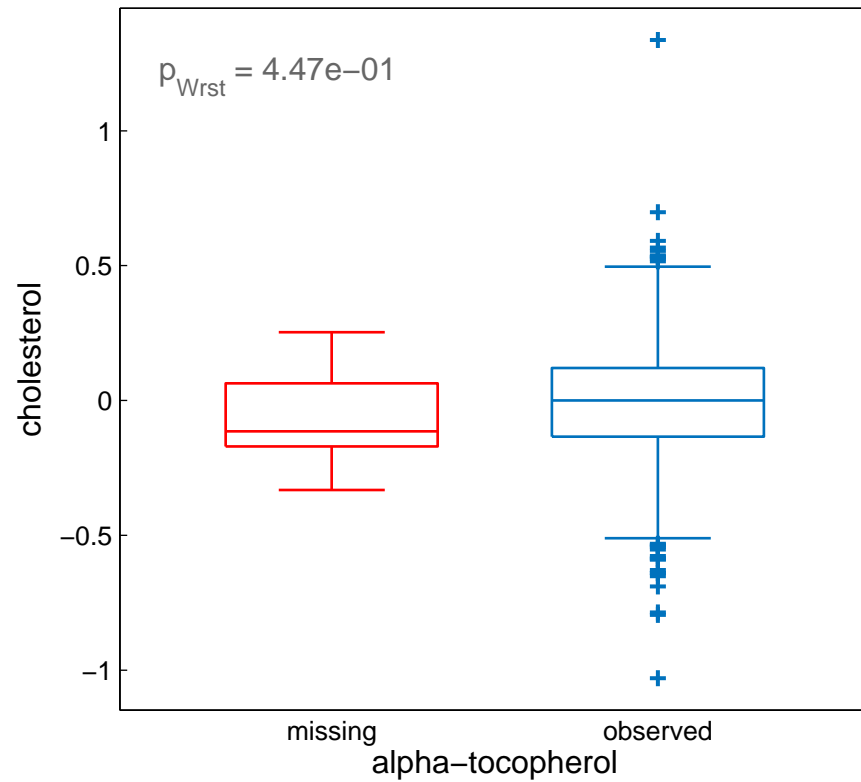

Missing values of 1–linoleoylglycerol (1–monolinolein)  
in 1–oleoylglycerol (1–monoolein)

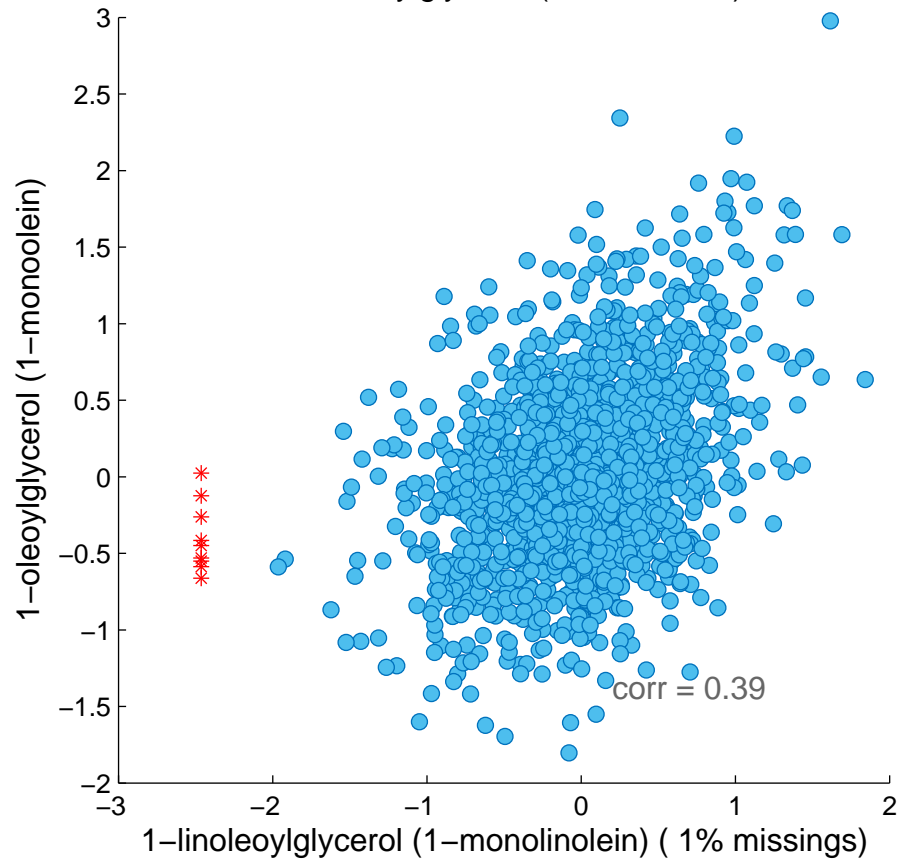

Concentrations of 1–oleoylglycerol (1–monoolein) in  
missing and observed 1–linoleoylglycerol (1–monolinolein)

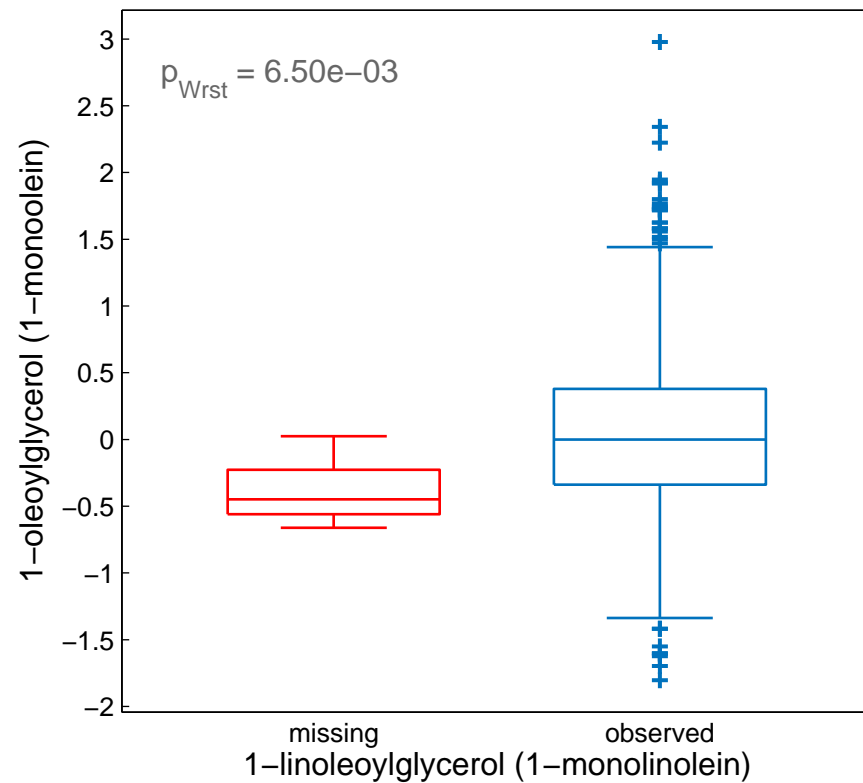

Missing values of arabinose  
in myo-inositol

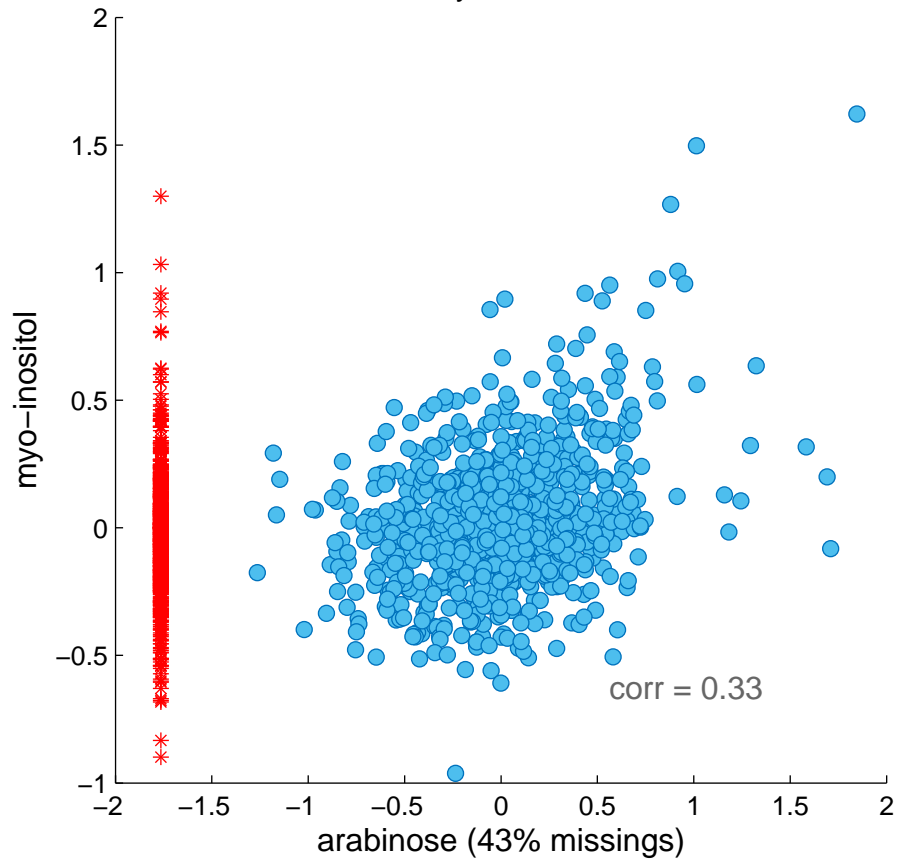

Concentrations of myo-inositol in  
missing and observed arabinose

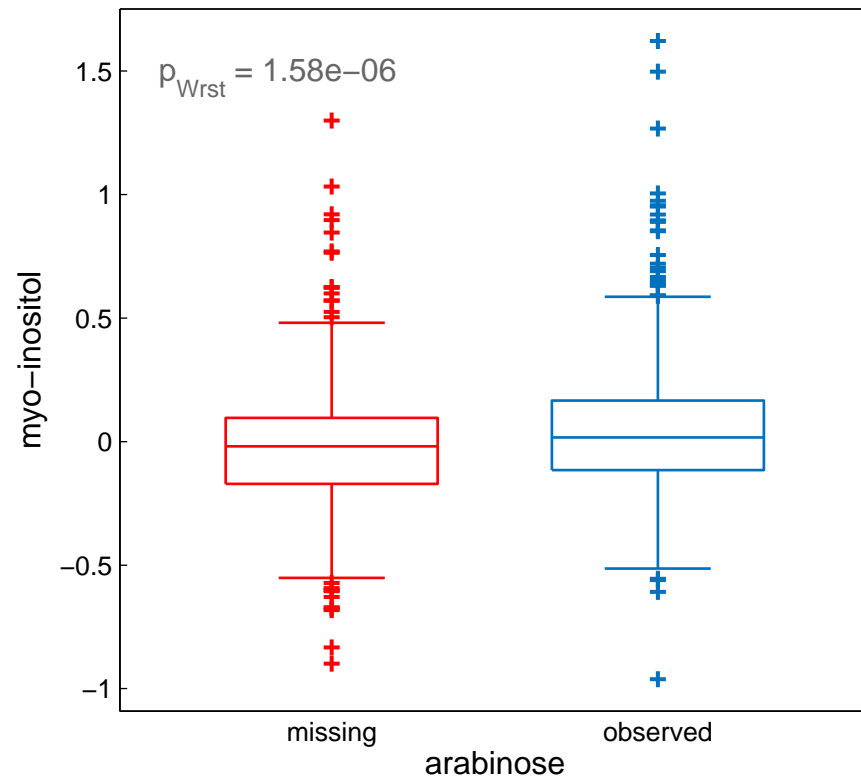

Missing values of arabitol  
in myo-inositol

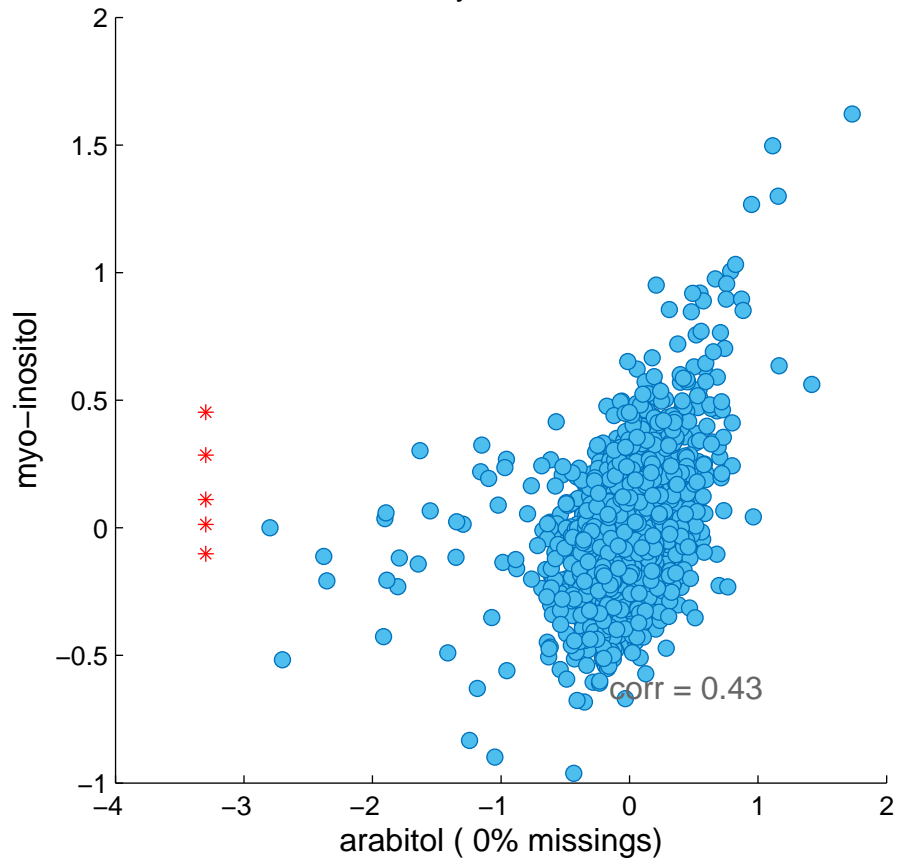

Concentrations of myo-inositol in  
missing and observed arabitol

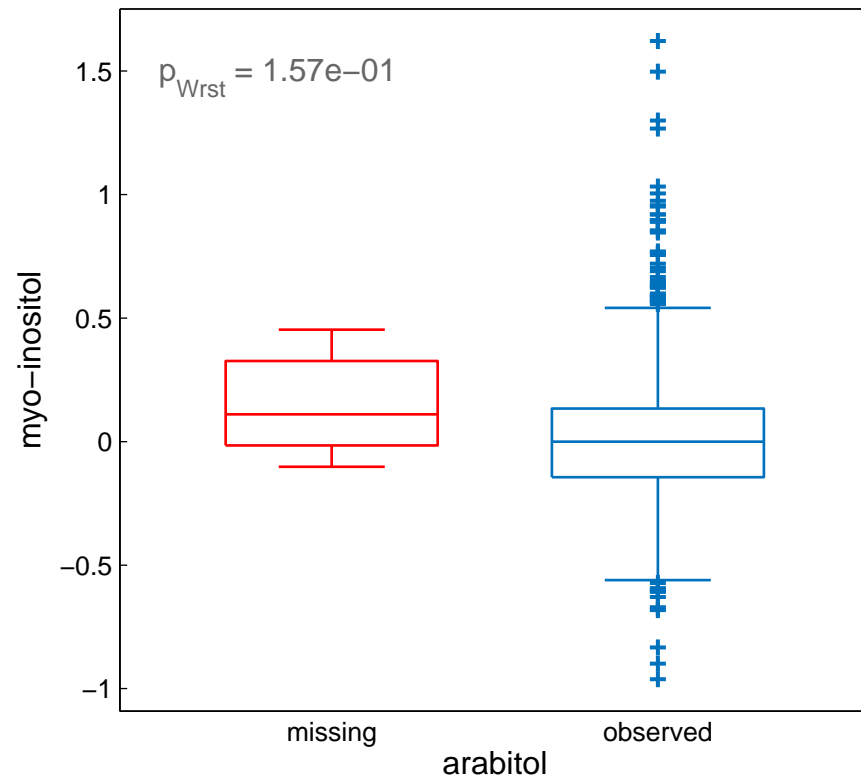

Missing values of ascorbate (Vitamin C)  
in pyruvate

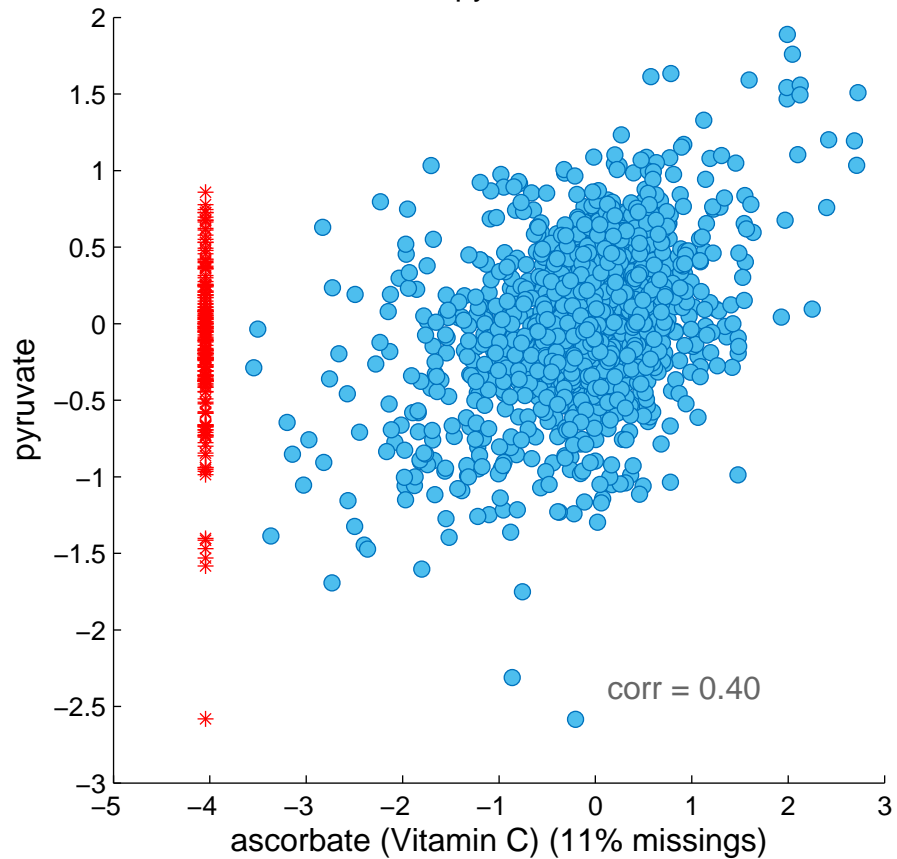

Concentrations of pyruvate in  
missing and observed ascorbate (Vitamin C)

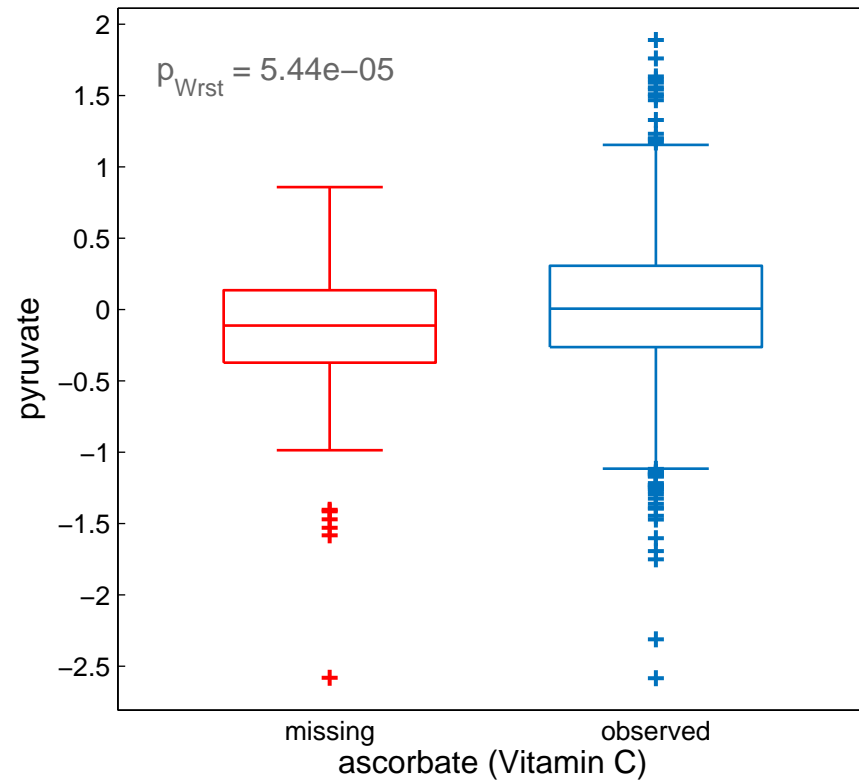



Missing values of asparagine  
in serine

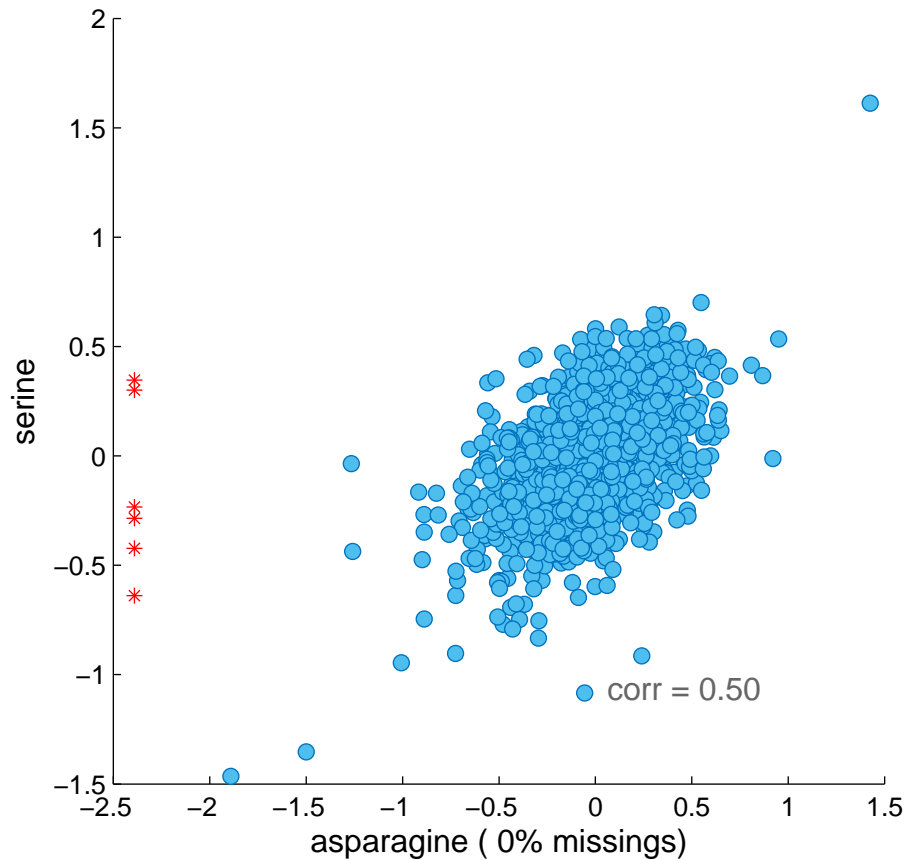

Concentrations of serine in  
missing and observed asparagine

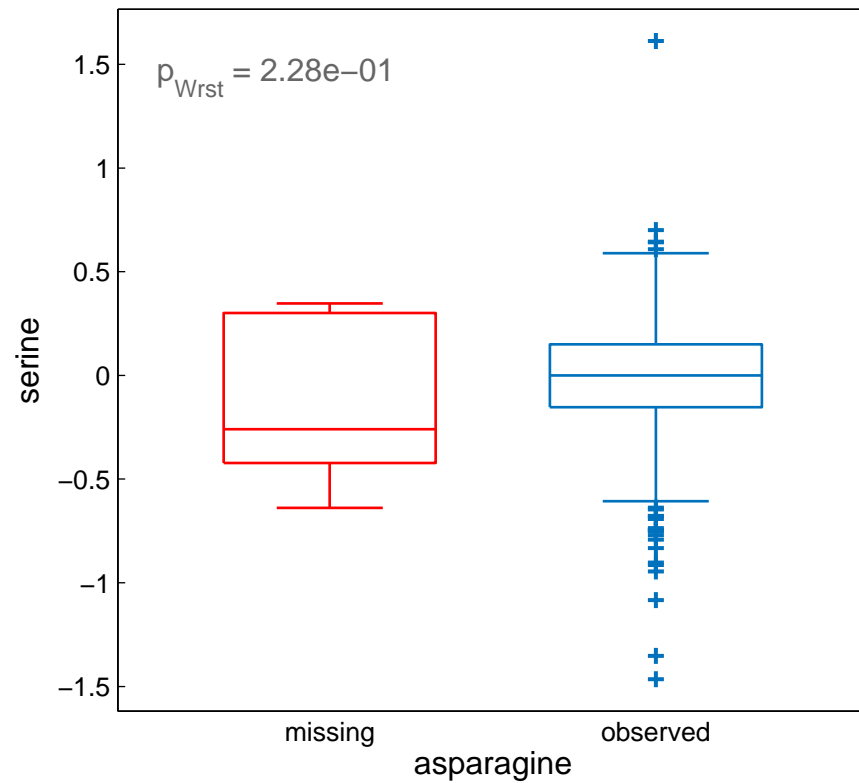

Missing values of aspartate  
in cystine

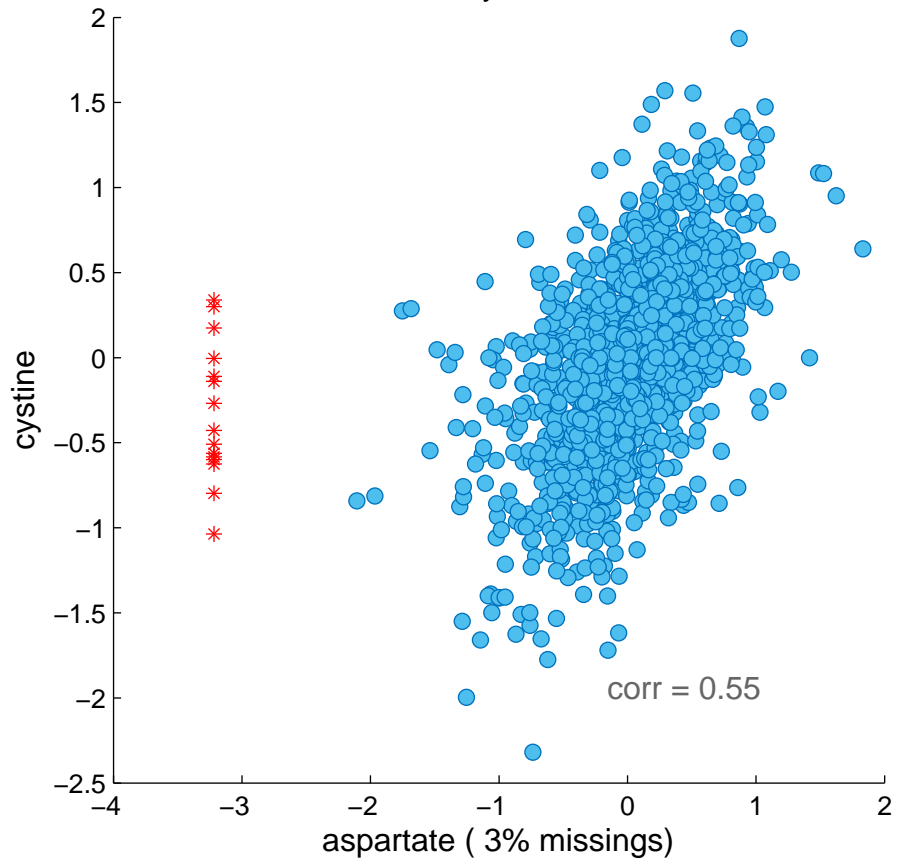

Concentrations of cystine in  
missing and observed aspartate

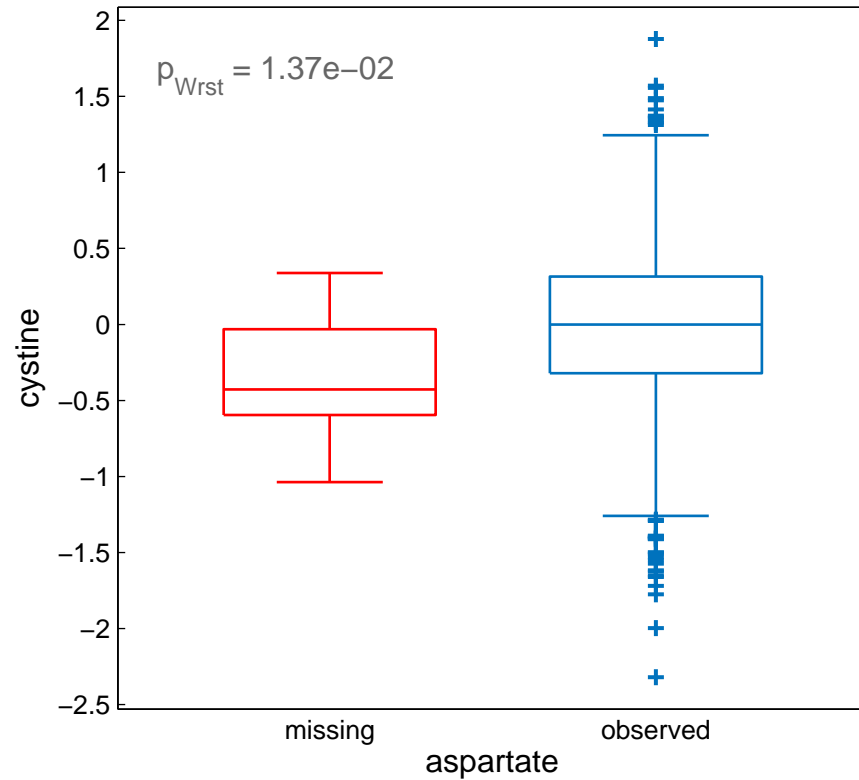

Missing values of aspartylphenylalanine  
in X-11805

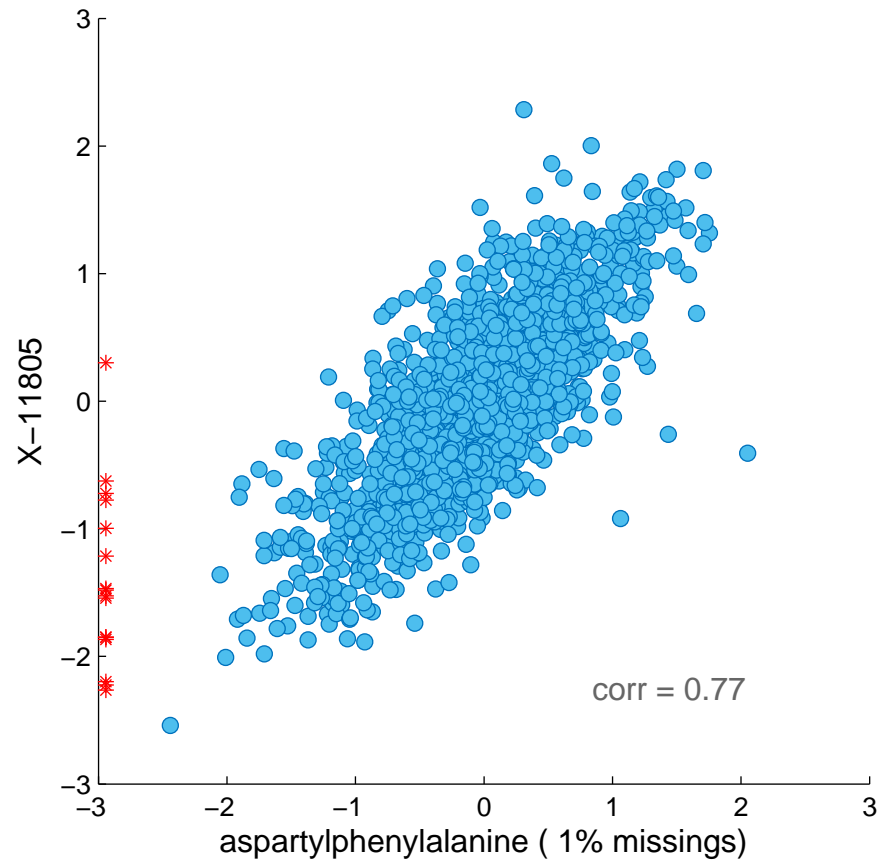

Concentrations of X-11805 in  
missing and observed aspartylphenylalanine

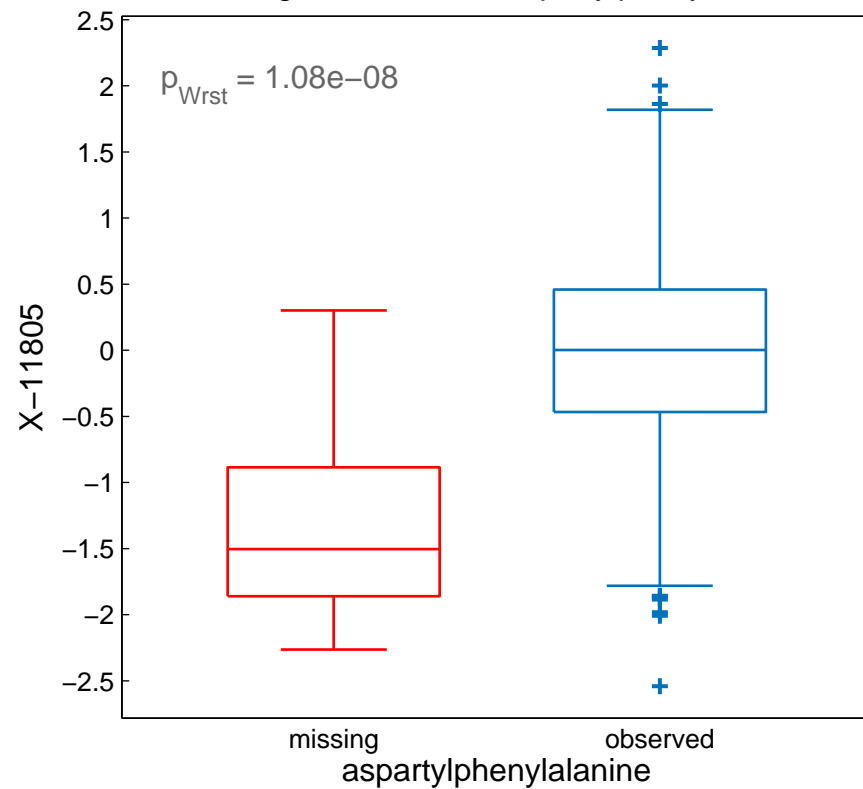

Missing values of benzoate  
in pelargonate (9:0)

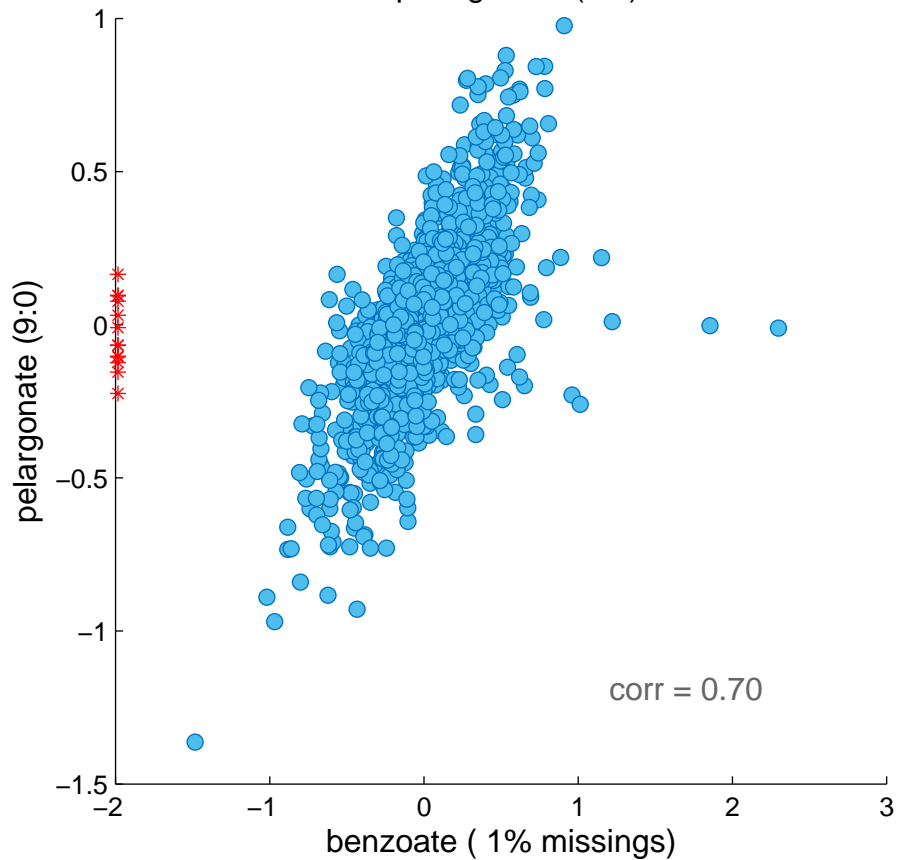

Concentrations of pelargonate (9:0) in  
missing and observed benzoate

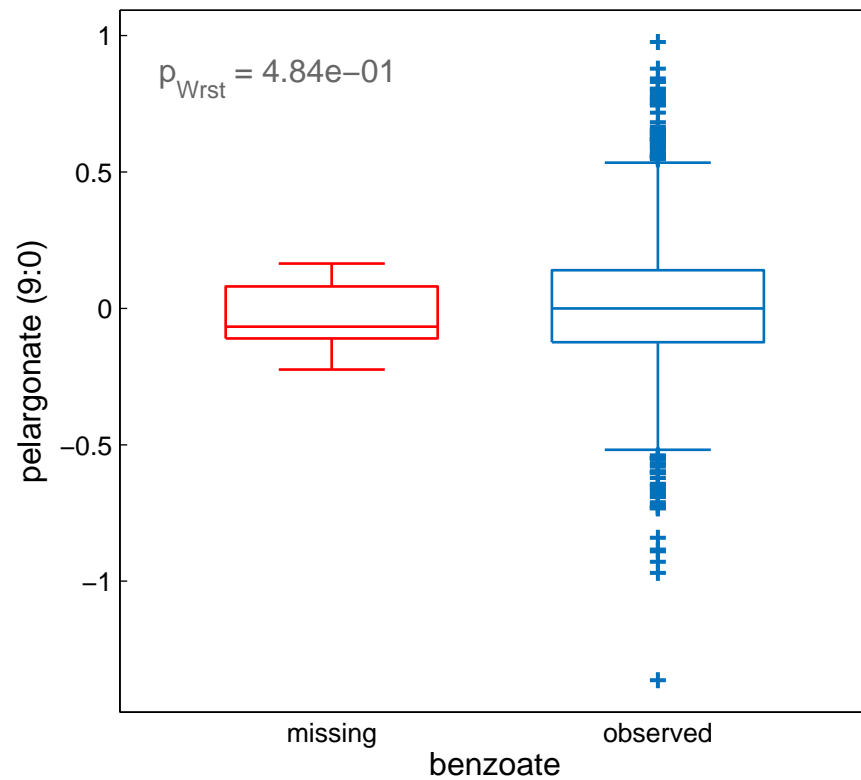

Missing values of beta-hydroxyisovalerate  
in alpha-hydroxyisovalerate

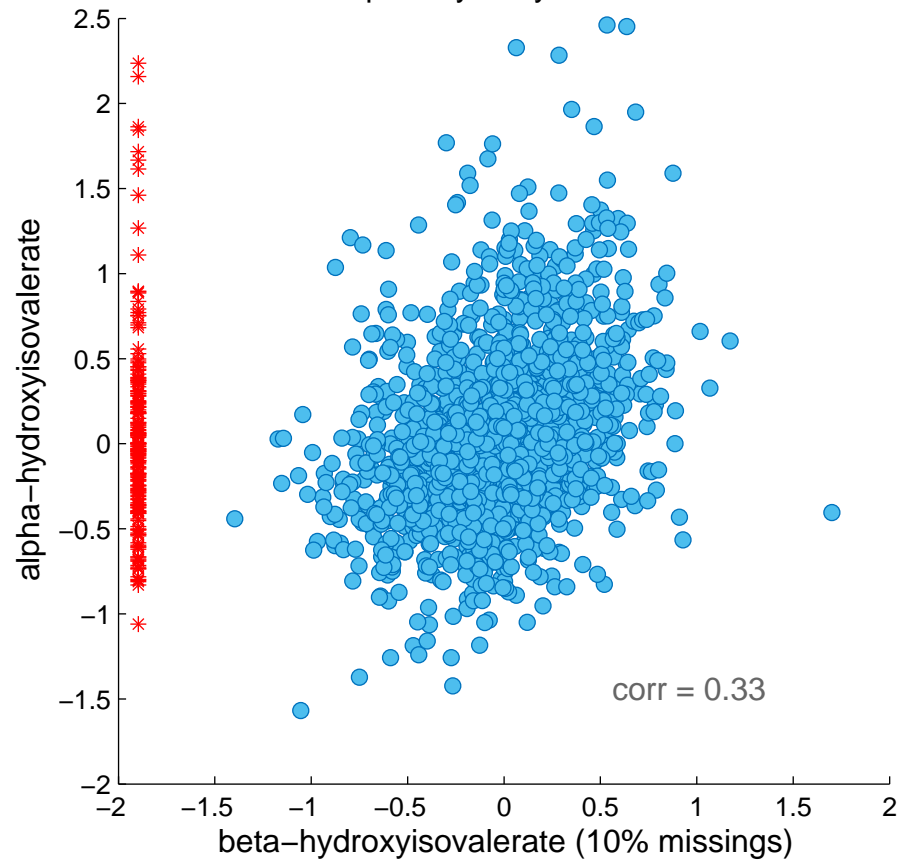

Concentrations of alpha-hydroxyisovalerate in  
missing and observed beta-hydroxyisovalerate

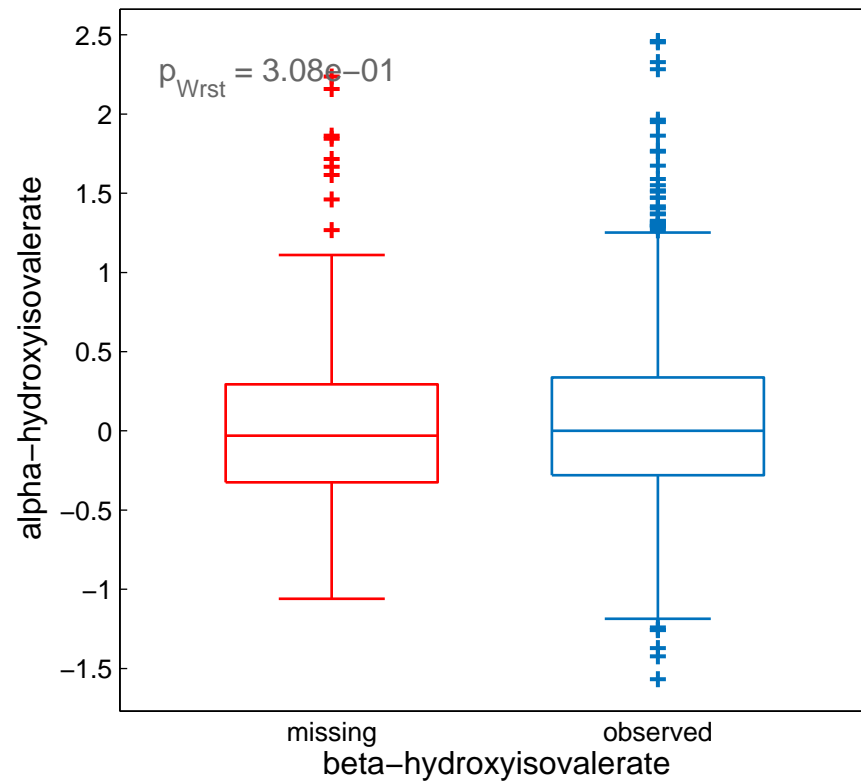

Missing values of bilirubin (E;Z or Z;E)  
in bilirubin (E,E)

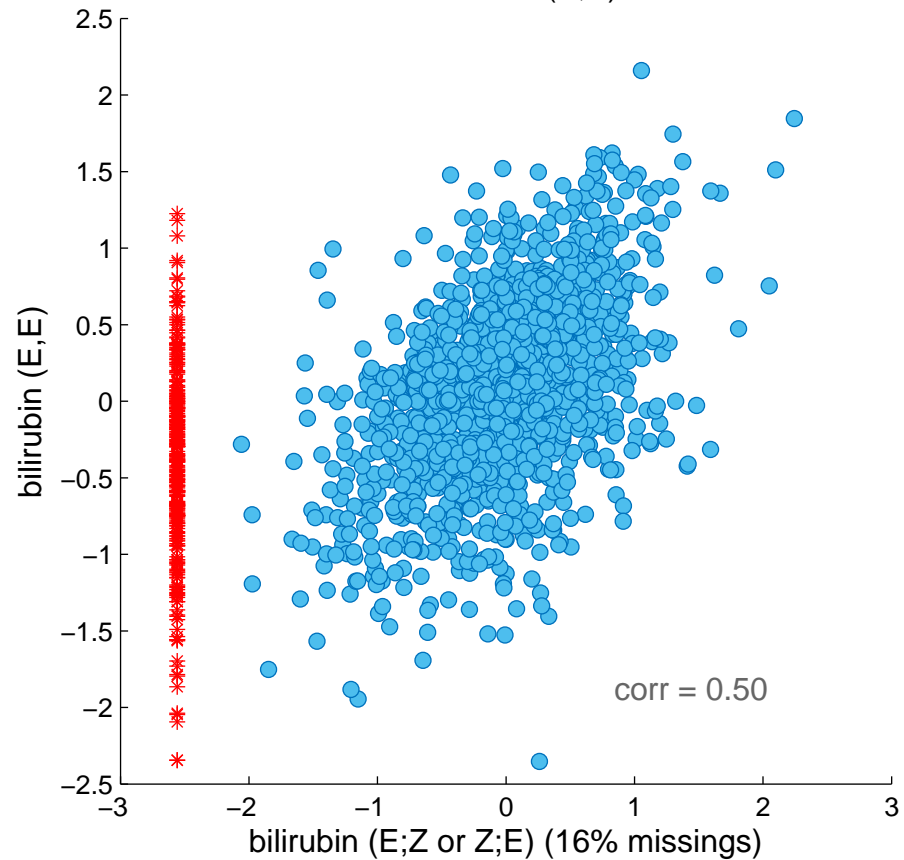

Concentrations of bilirubin (E,E) in  
missing and observed bilirubin (E;Z or Z;E)

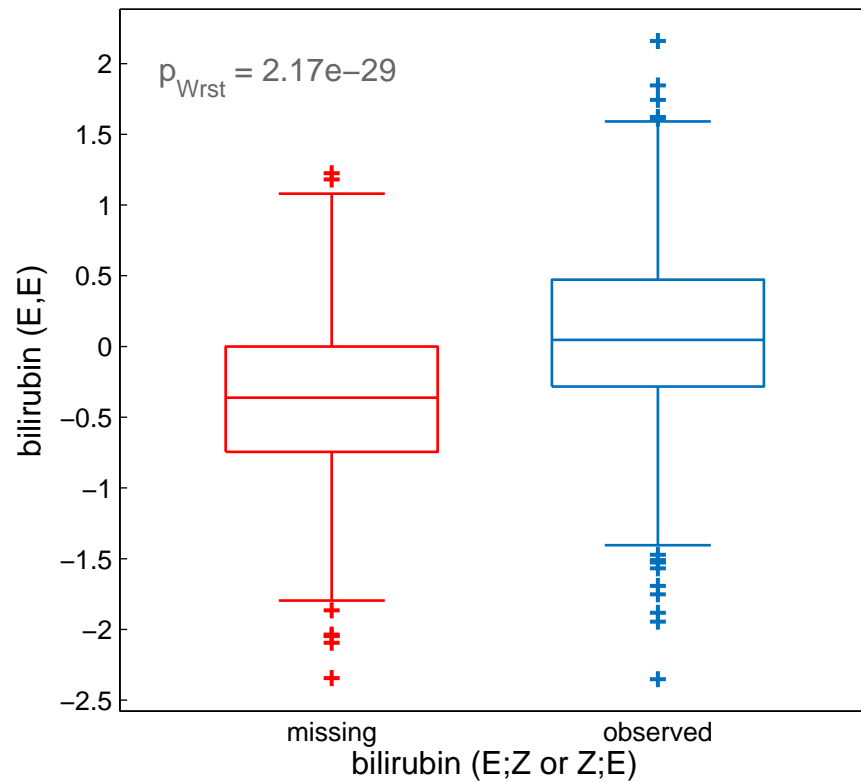

Missing values of bilirubin (Z,Z)  
in biliverdin

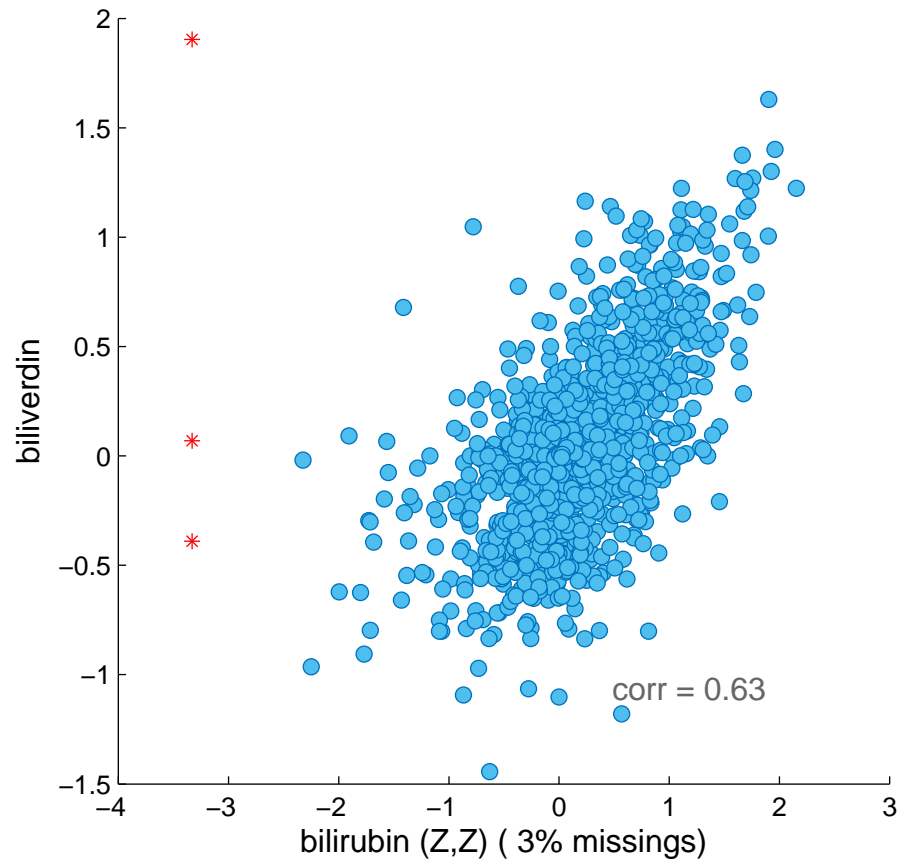

Concentrations of biliverdin in  
missing and observed bilirubin (Z,Z)

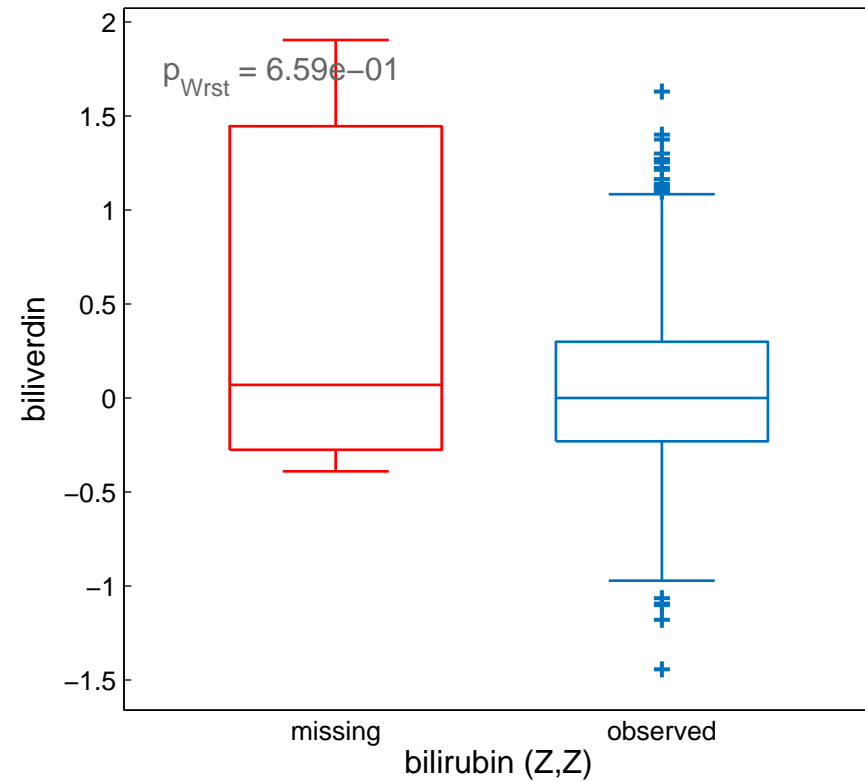

Missing values of biliverdin  
in bilirubin (Z,Z)

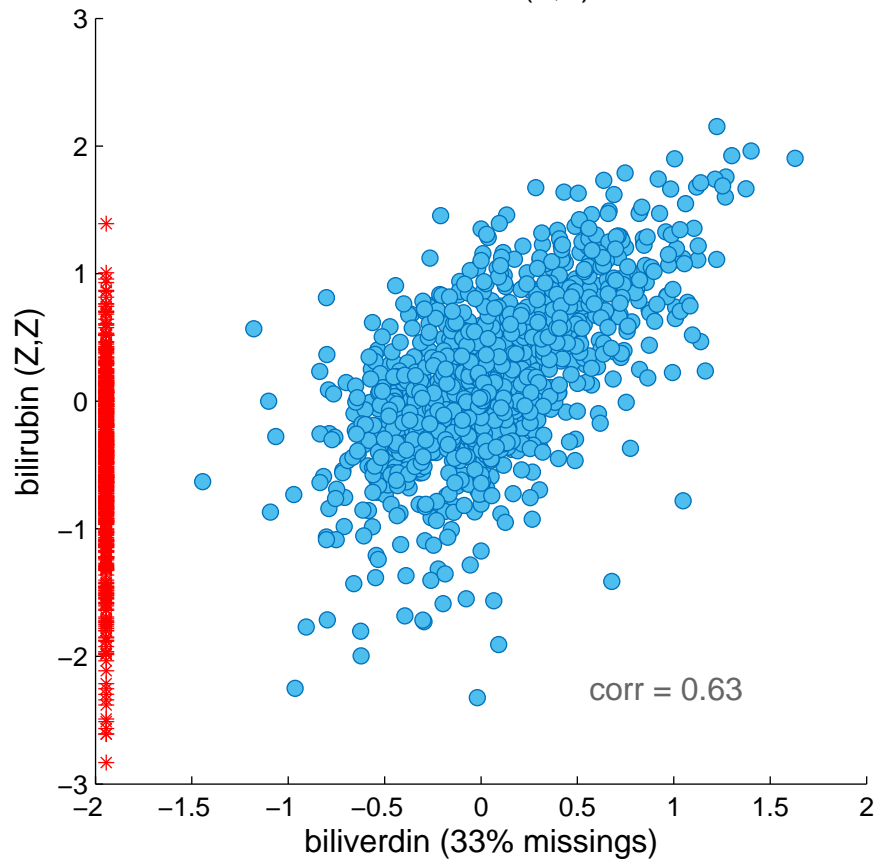

Concentrations of bilirubin (Z,Z) in  
missing and observed biliverdin

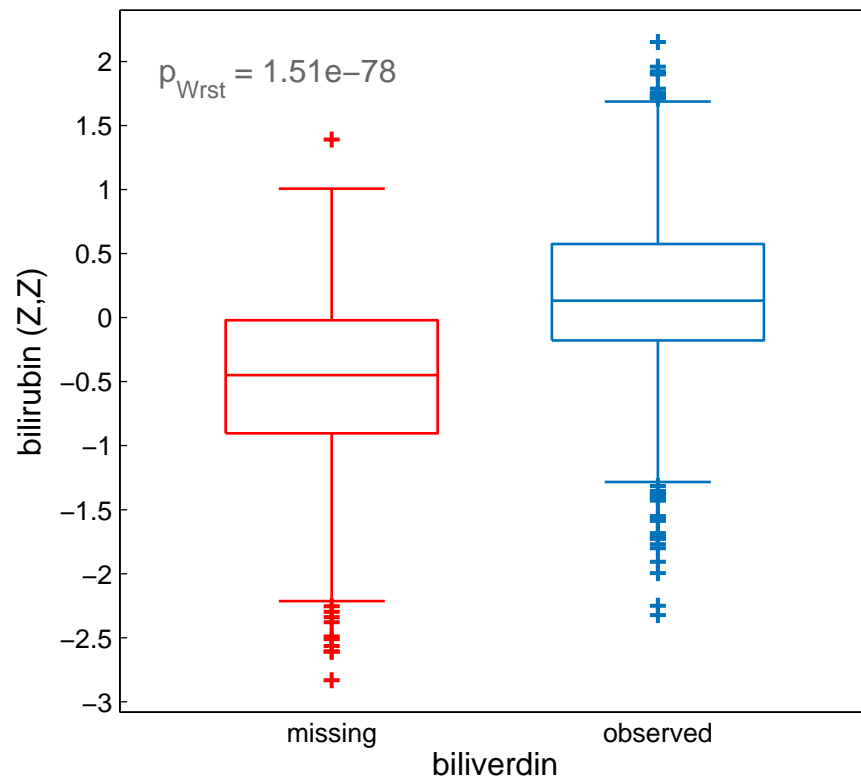



Missing values of caffeine  
in paraxanthine

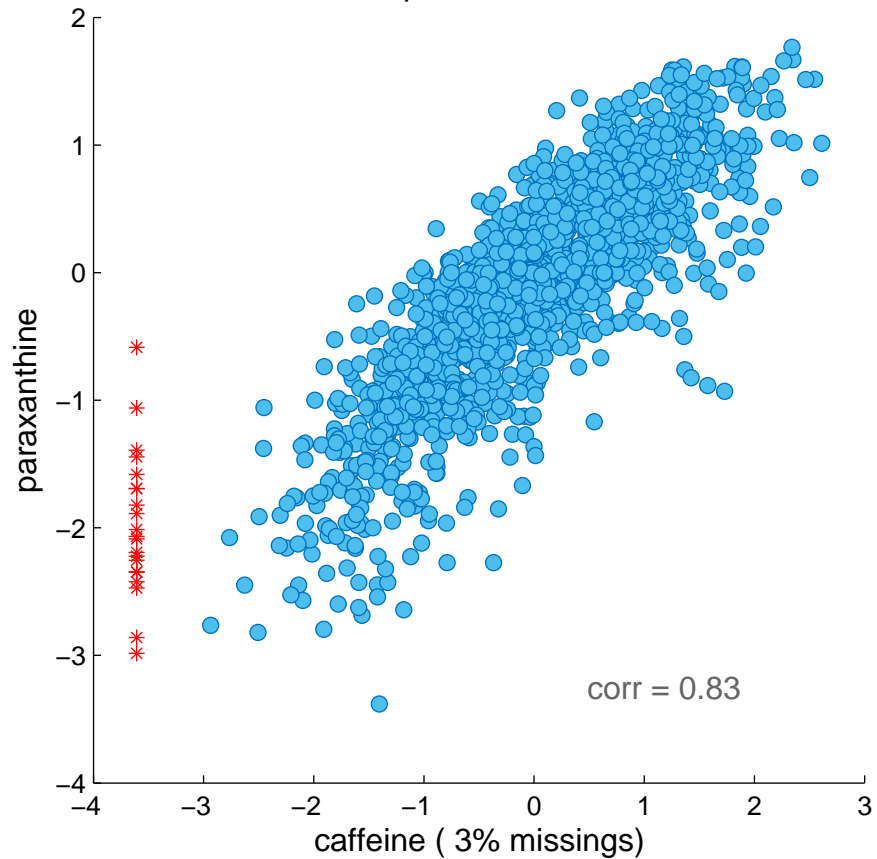

Concentrations of paraxanthine in  
missing and observed caffeine

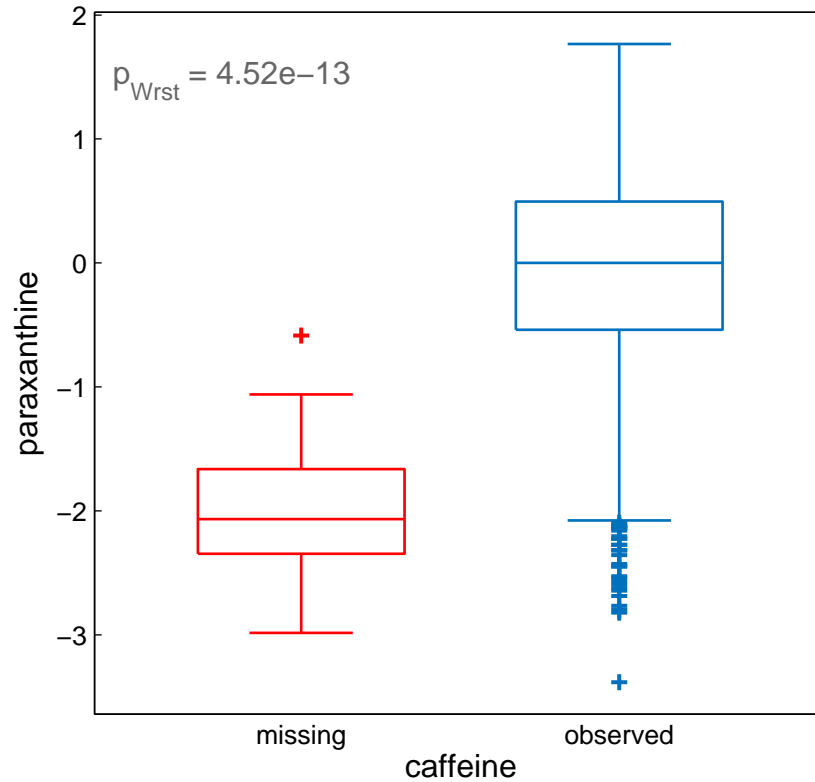

Supplement: 11306_2018_1420_MOESM1_ESM.pdf [file 11306_2018_1420_MOESM1_ESM.pdf]
