# Supplementary material for: Characterization of missing values in untargeted MS-based metabolomics data and evaluation of missing data handling strategies
Source: PubMed Central journal article supplement (PMC6153696; doi:10.1007/s11306-018-1420-2), 2018-09-20

# Characterization of missingness in untargeted MS-based metabolomics data sets and evaluation of missing data handling strategies

*Kieu Trinh Do<sup>¶</sup>, Simone Wahl<sup>¶</sup>, Johannes Raffler, Sophie Molnos, Michael Laimighofer, Jerzy Adamski, Karsten Suhre, Konstantin Strauch, Annette Peters, Christian Gieger, Claudia Langenberg, Isobel D. Stewart, Fabian J. Theis, Harald Grallert, Gabi Kastenmüller<sup>#</sup>, Jan Krumsiek<sup>#</sup>*

## Supporting Information File S5: Evaluation results of the simulation study

Shown are evaluation results for different simulated data scenarios. (A) Kernel density plots of original complete data of metabolites with histograms of observed (blue), imputed data points in one metabolite (violet), and imputed data points in both metabolites (red). (B) Scatterplots of metabolite 1 and metabolite 2. (C) Mean squared deviation (MSD) for different amount of missing values with increasing true effect. (D) Average absolute bias of Pearson correlation (cor), partial correlation (pcor), linear regression (lm), and logistic regression estimates (logistic regr.) for different amount of missing values with increasing true effect. Bias is defined as the estimate obtained from the respective imputation method minus true correlation, with mean  $\pm$  1 SD across 250 simulations. (E) Power curves of hypothesis test for Pearson correlation, partial correlation, linear regression, and logistic regression analyses for different amount of missing values with increasing true effect. The y-axis shows the proportion of significant estimates among the 250 simulations; at null hypothesis correlation = 0, it shows the type 1 error, while power is reflected when true correlation is  $>0$ .

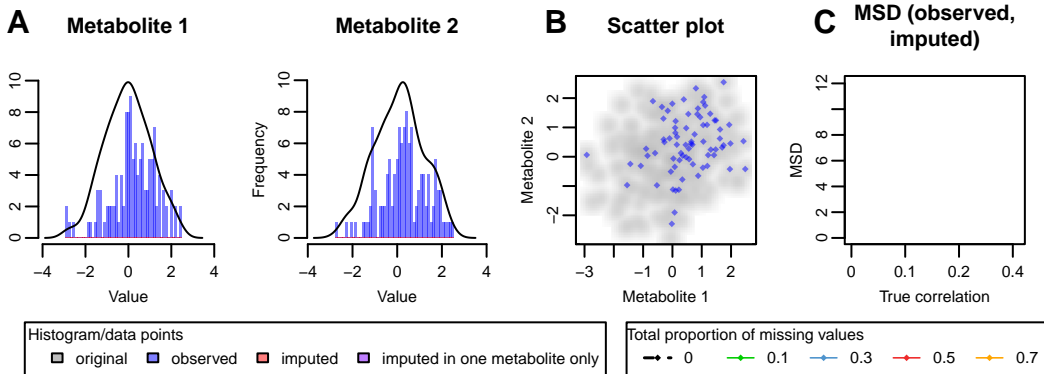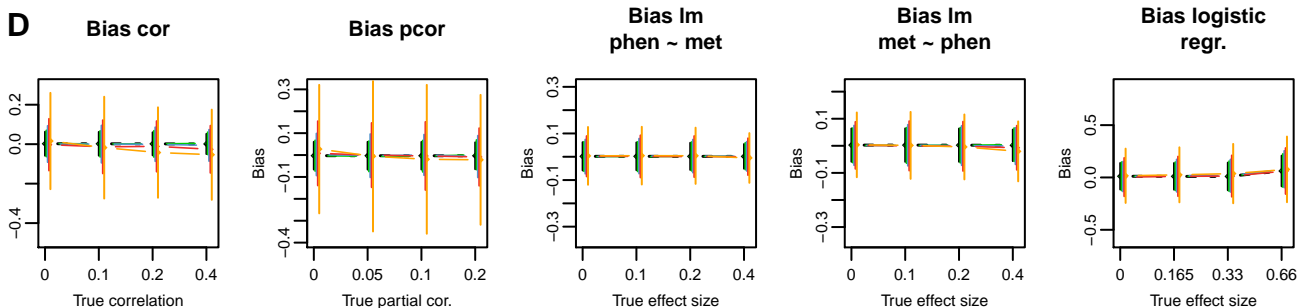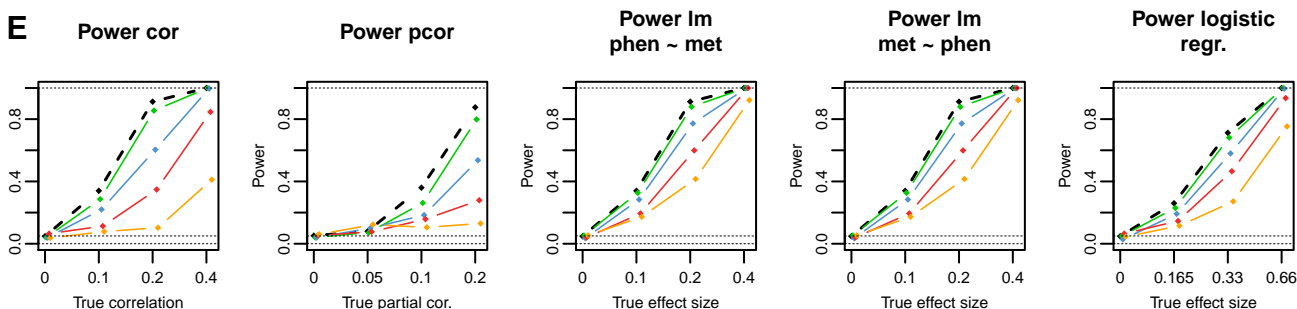

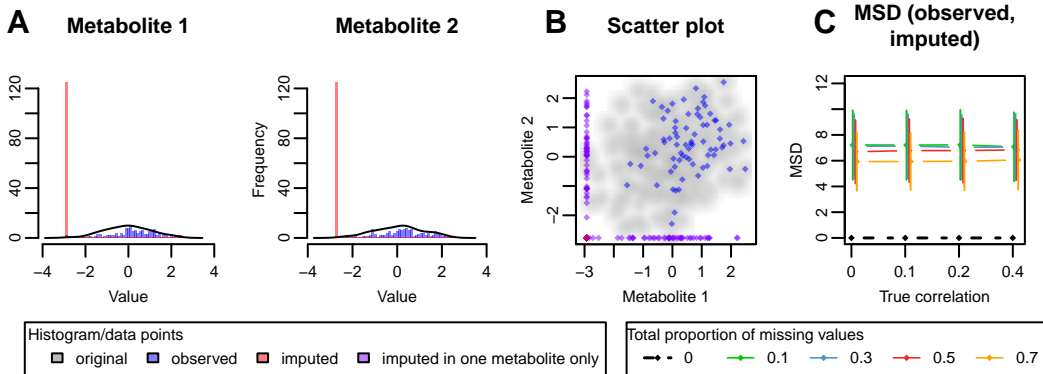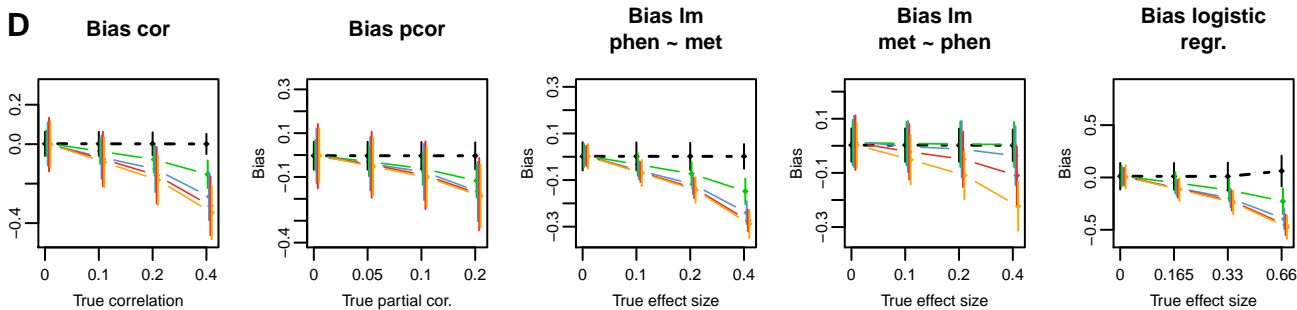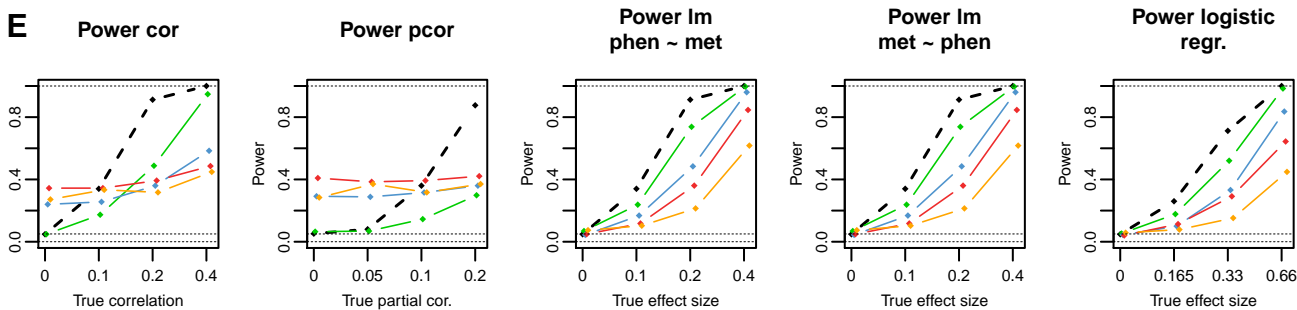

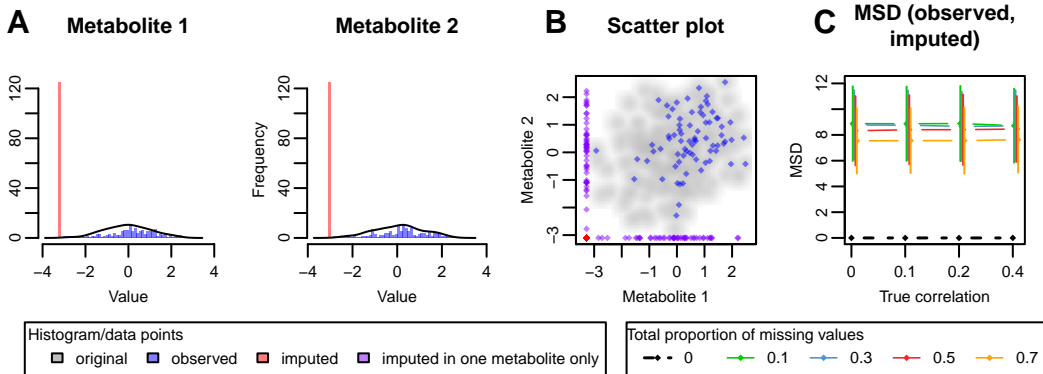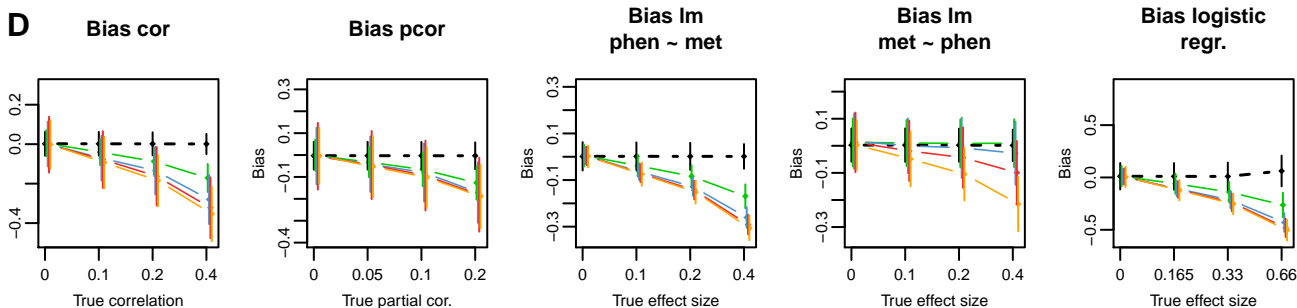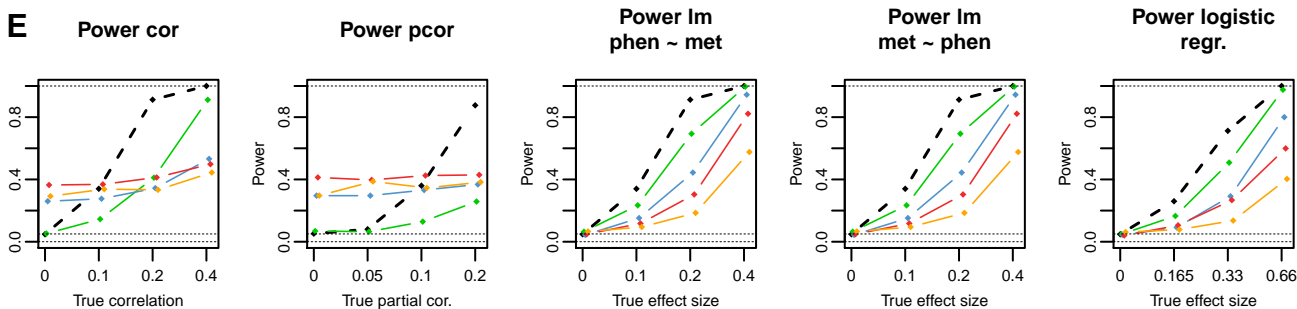



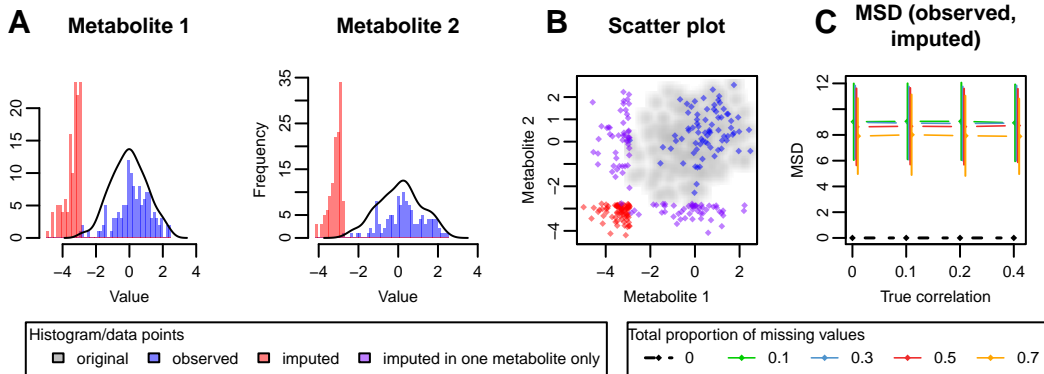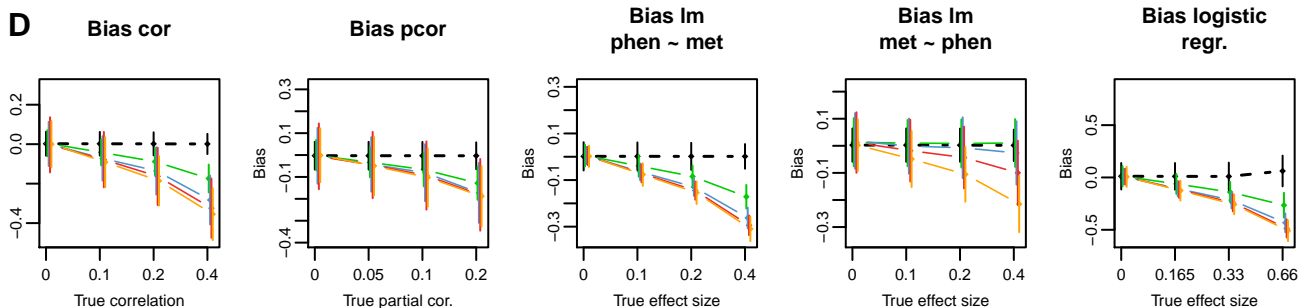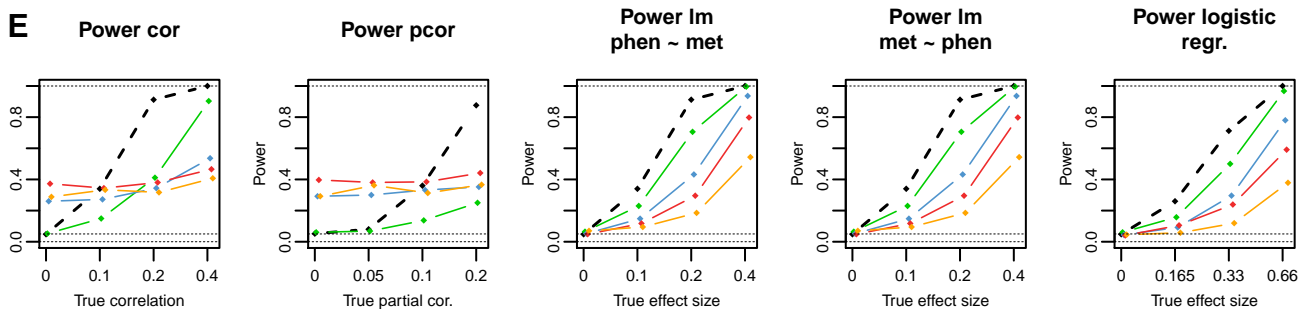

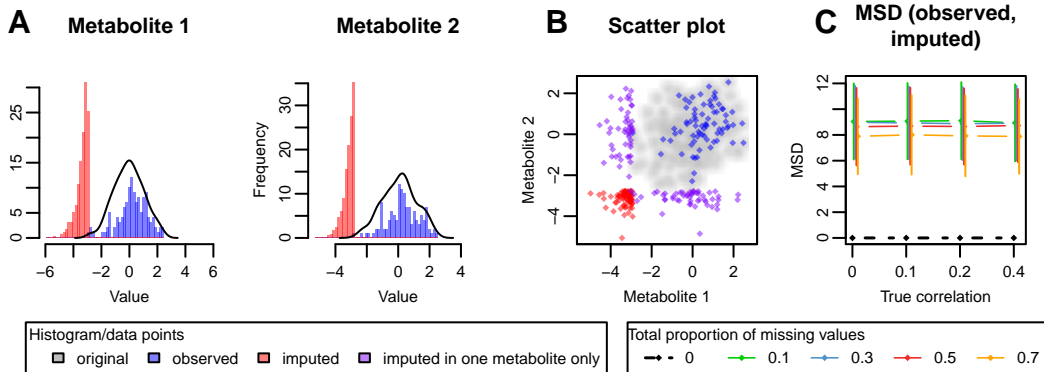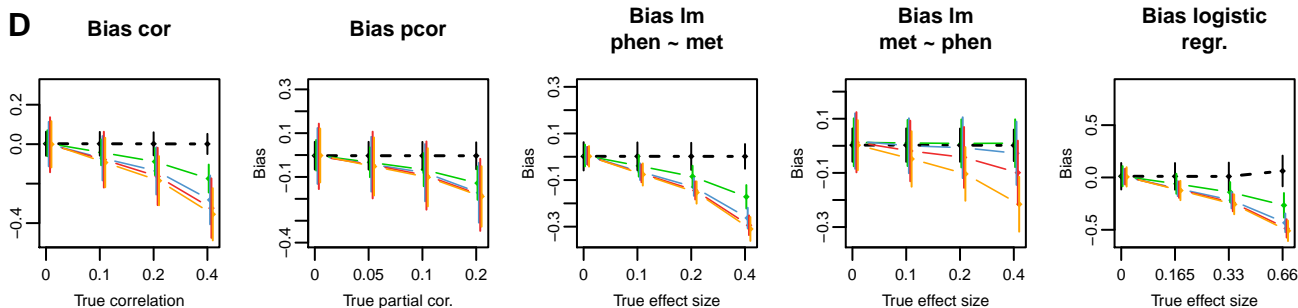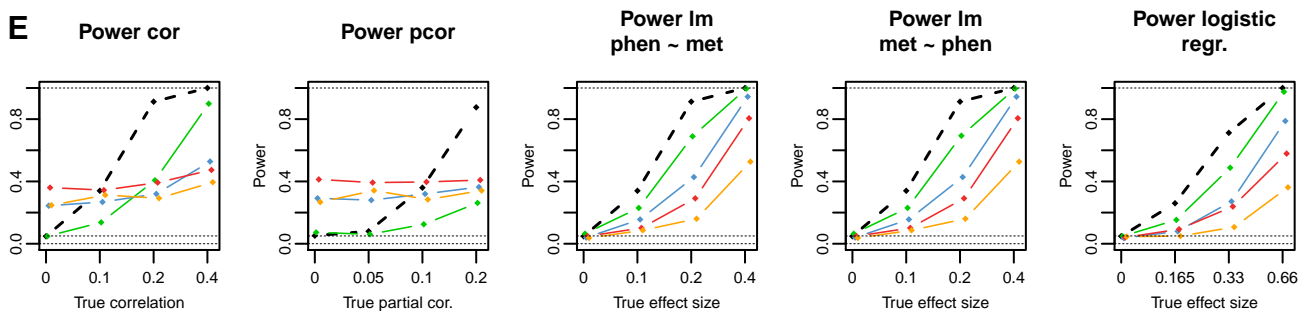

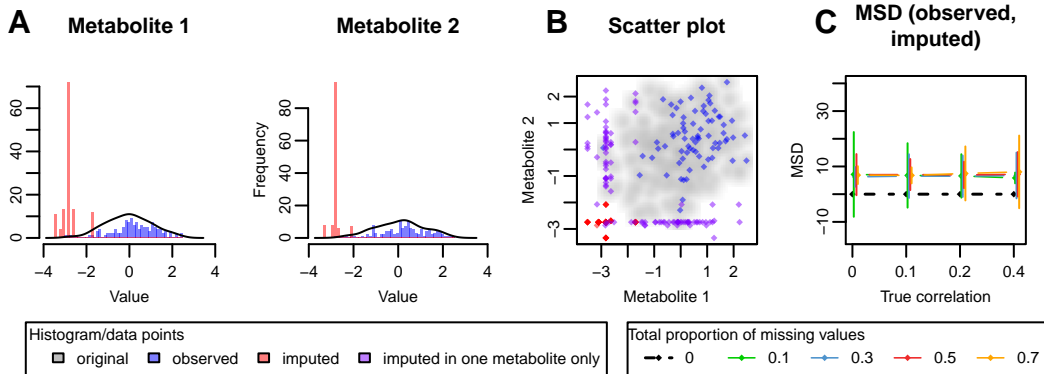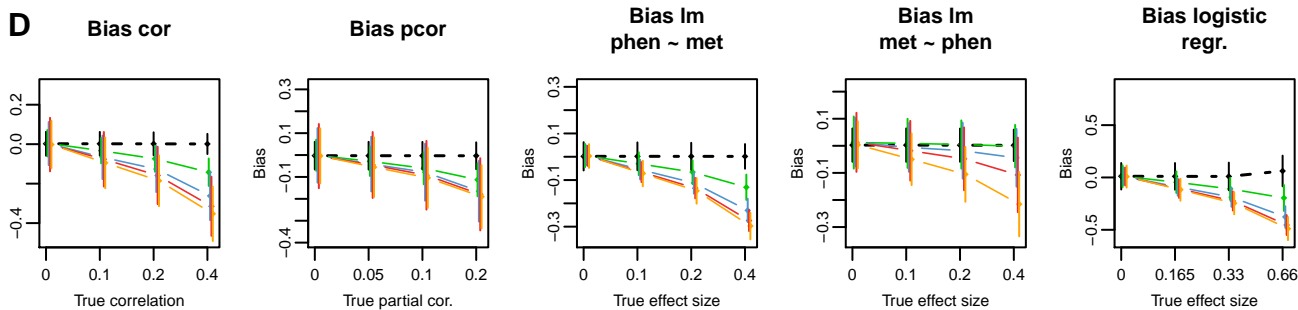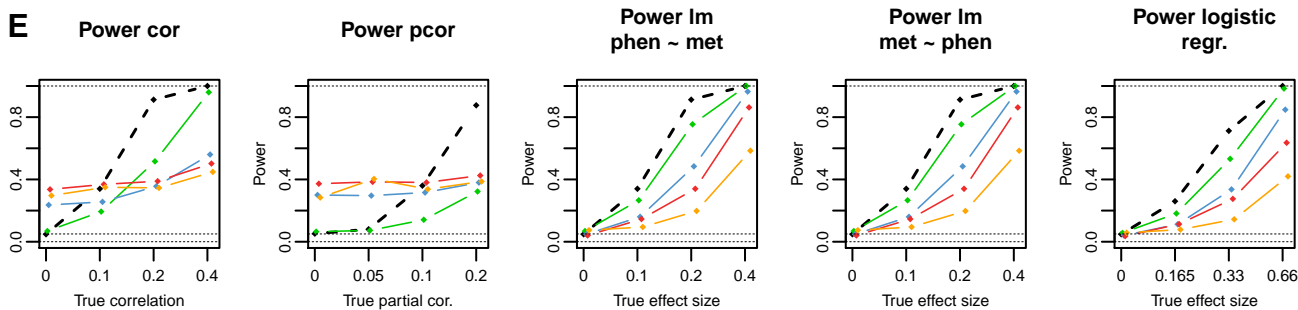

**A** Metabolite 1

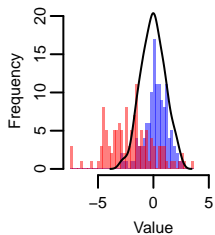

Metabolite 2

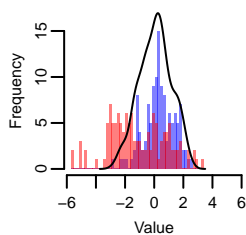

**B** Scatter plot

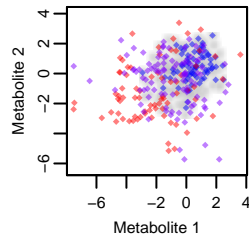

**C** MSD (observed, imputed)

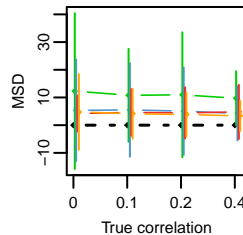

Histogram/data points  
 ■ original ■ observed ■ imputed ■ imputed in one metabolite only

Total proportion of missing values  
 -●- 0 -●- 0.1 -●- 0.3 -●- 0.5 -●- 0.7

**D** Bias cor

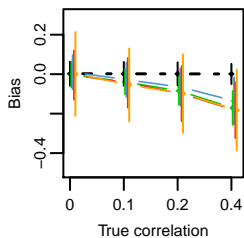

Bias pcor

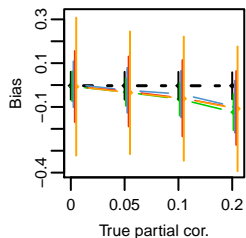

Bias lm phen ~ met

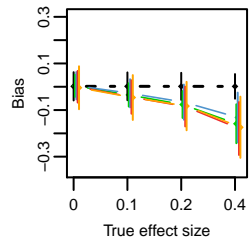

Bias lm met ~ phen

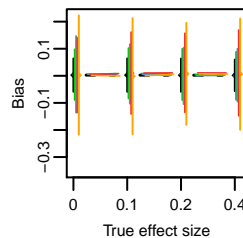

Bias logistic regr.

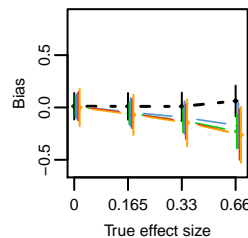

**E** Power cor

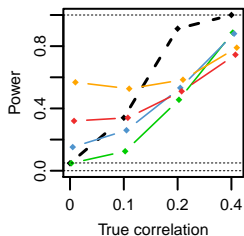

Power pcor

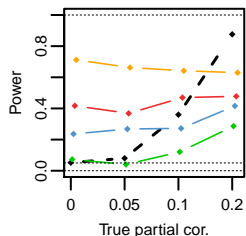

Power lm phen ~ met

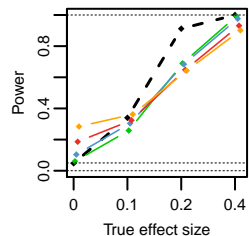

Power lm met ~ phen

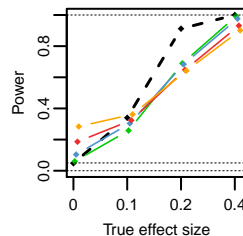

Power logistic regr.

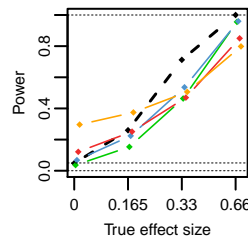

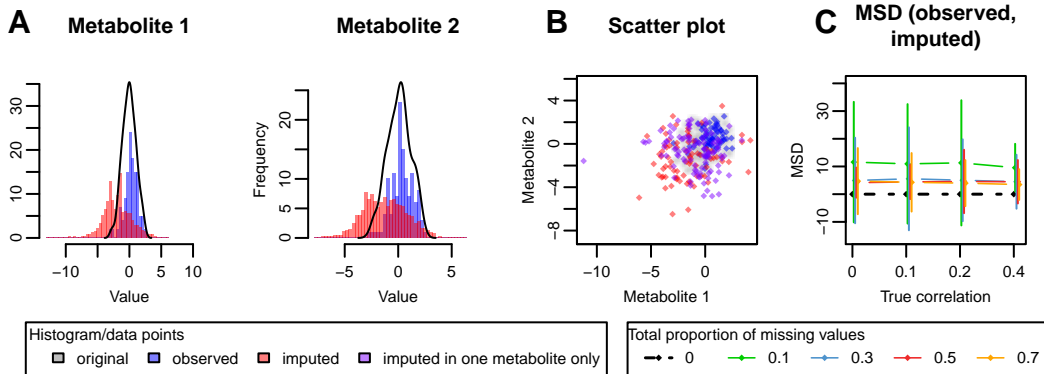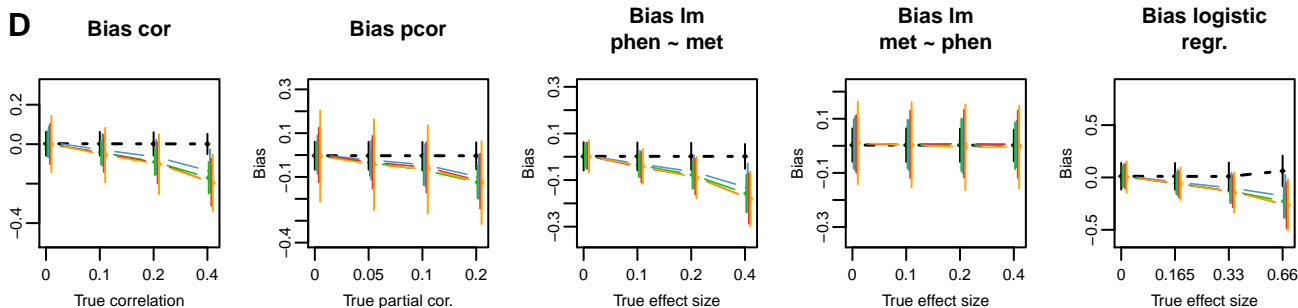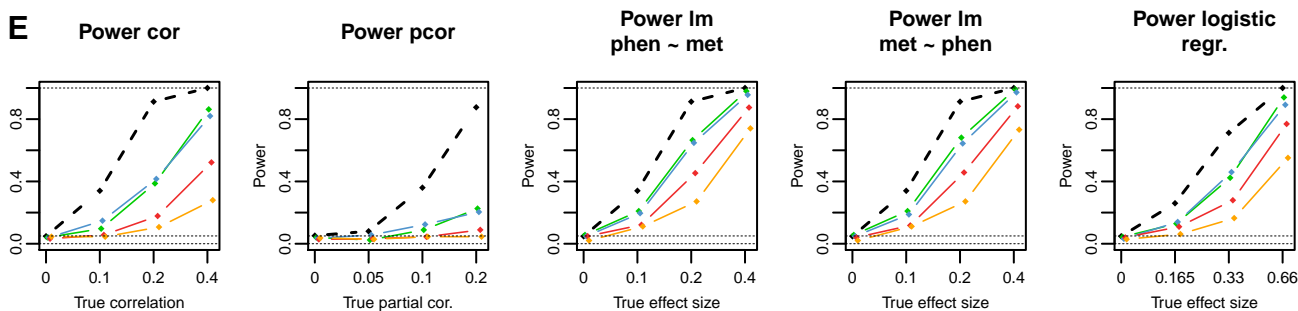

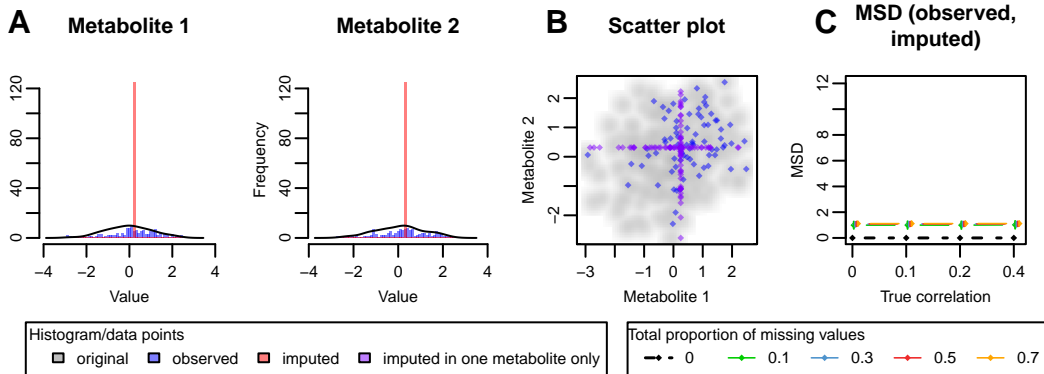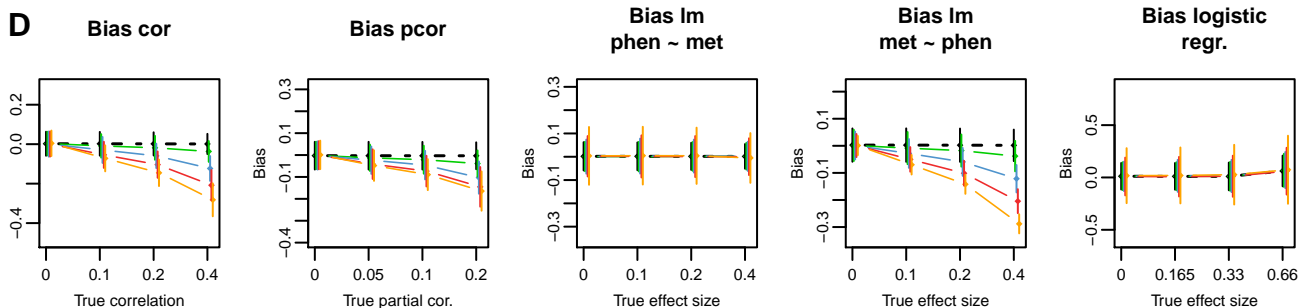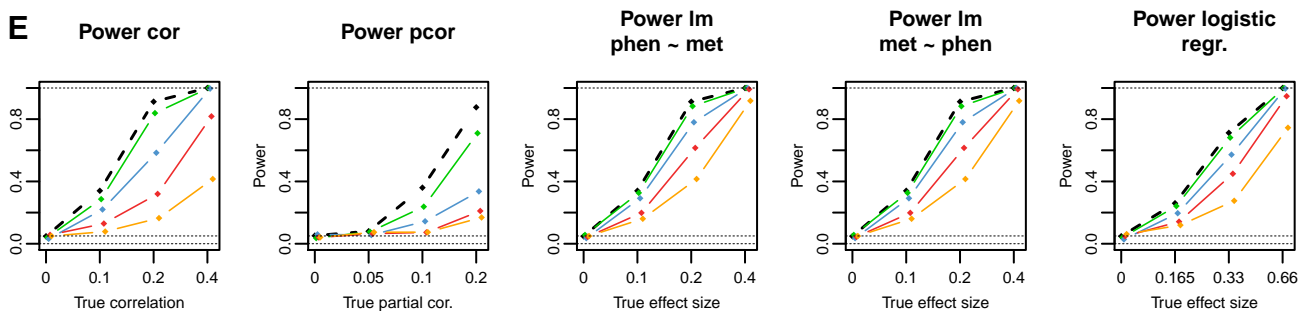

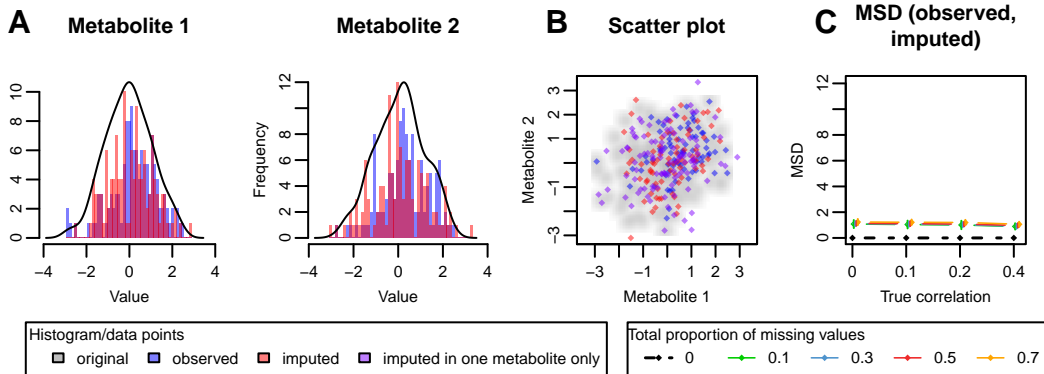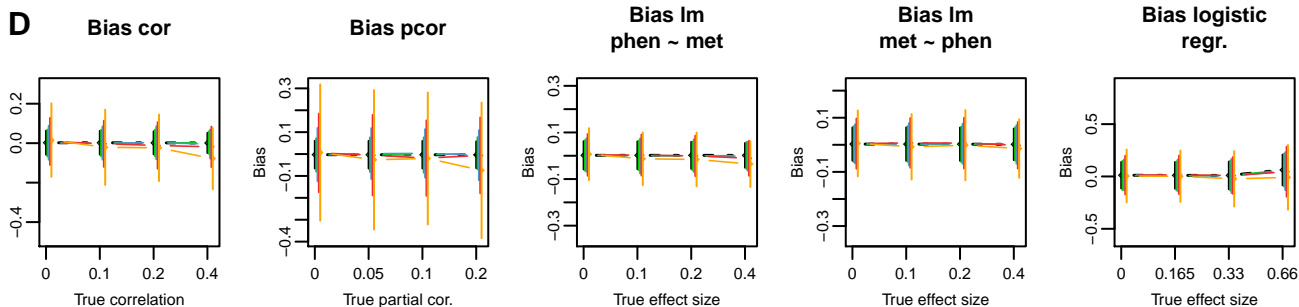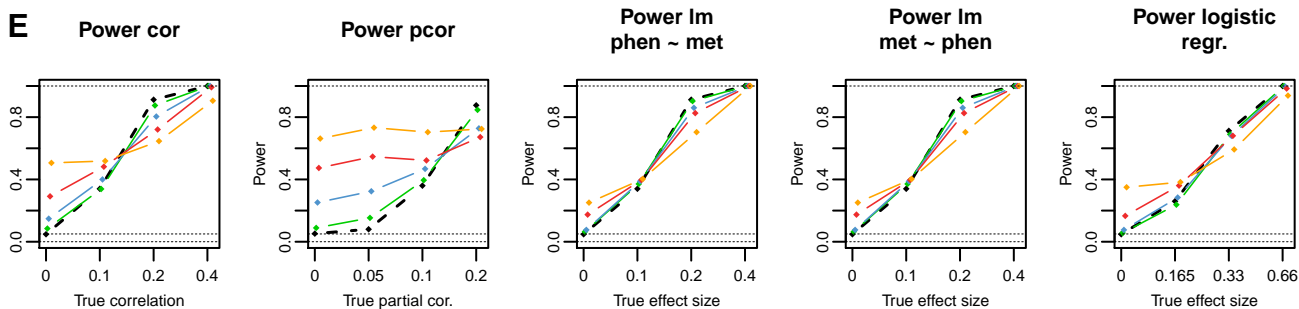

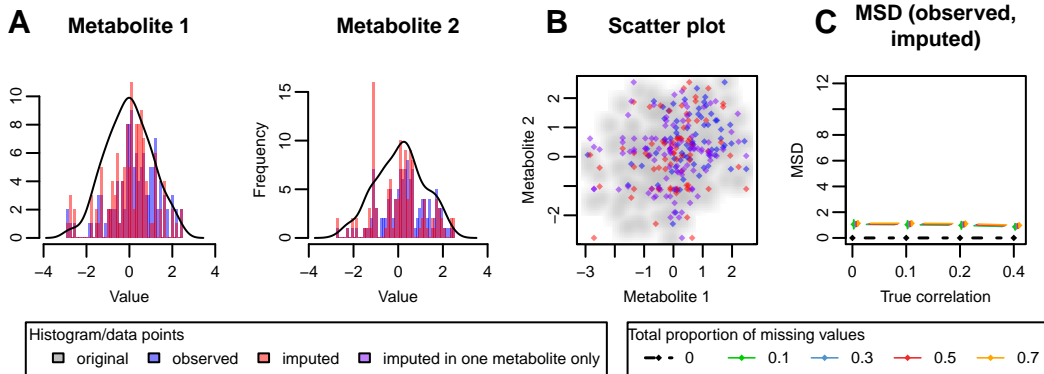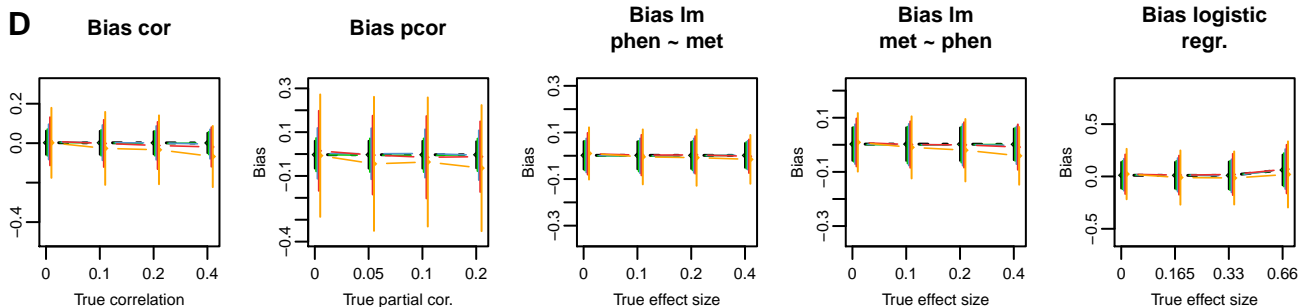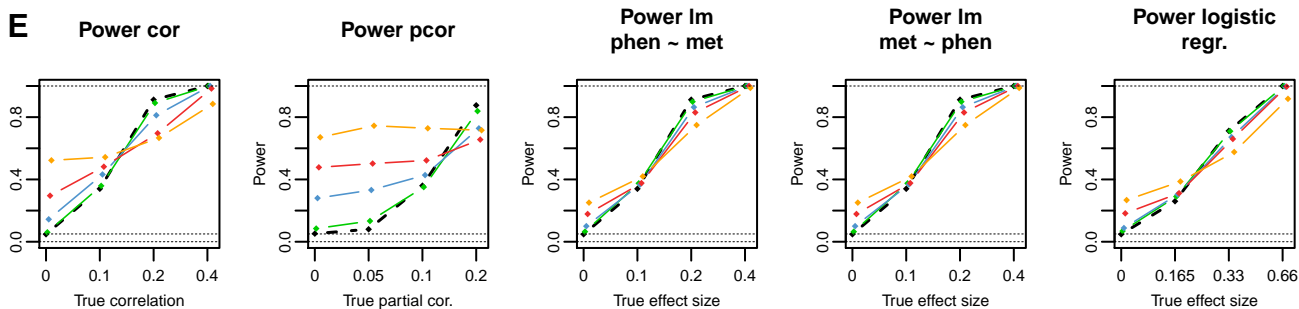



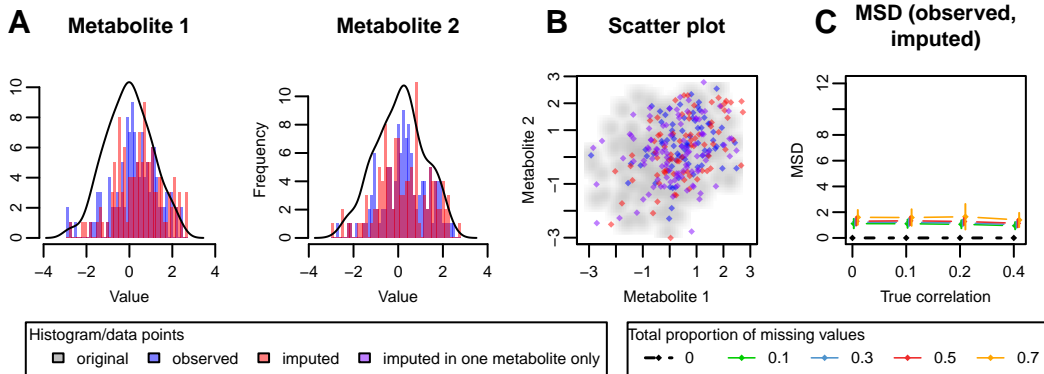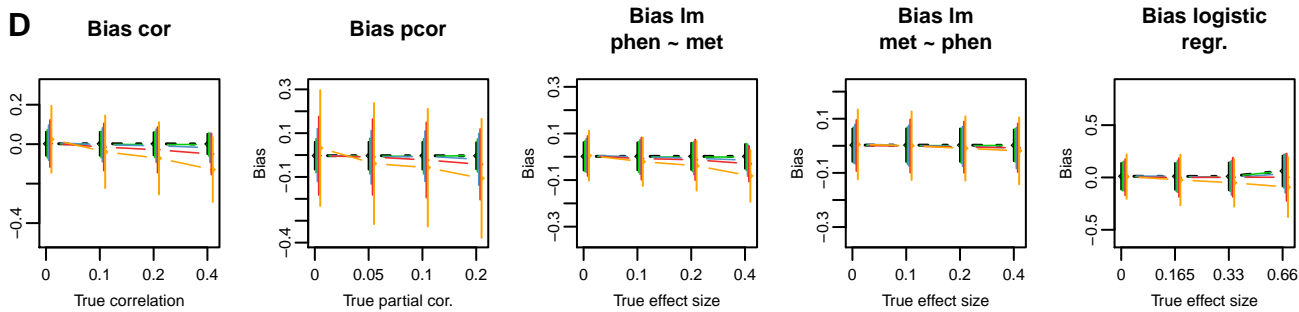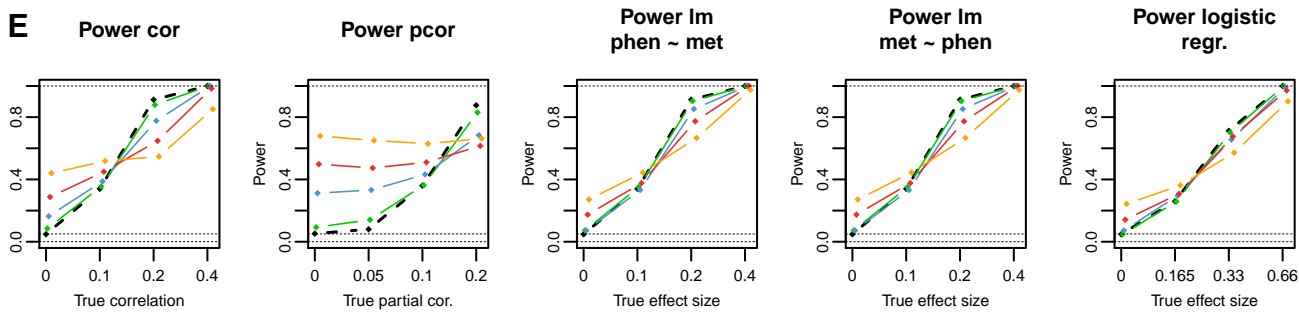

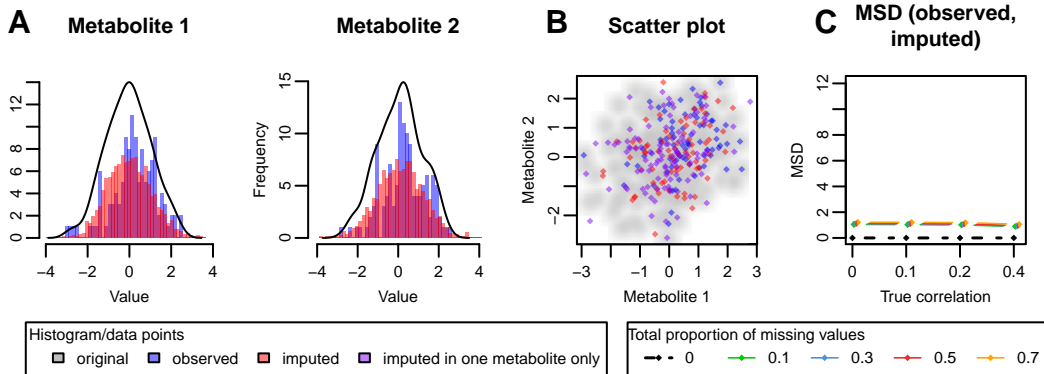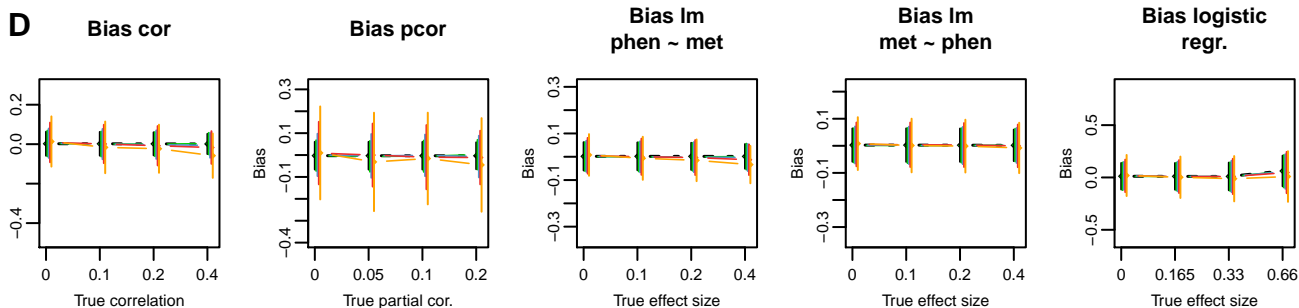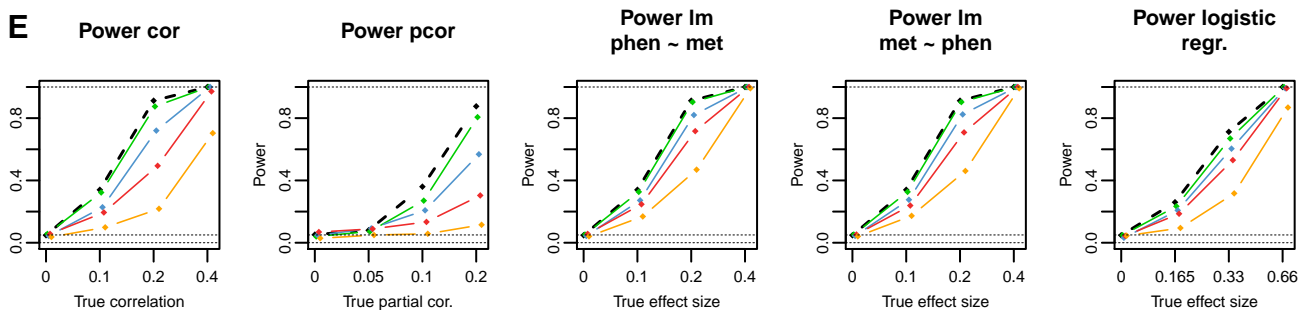

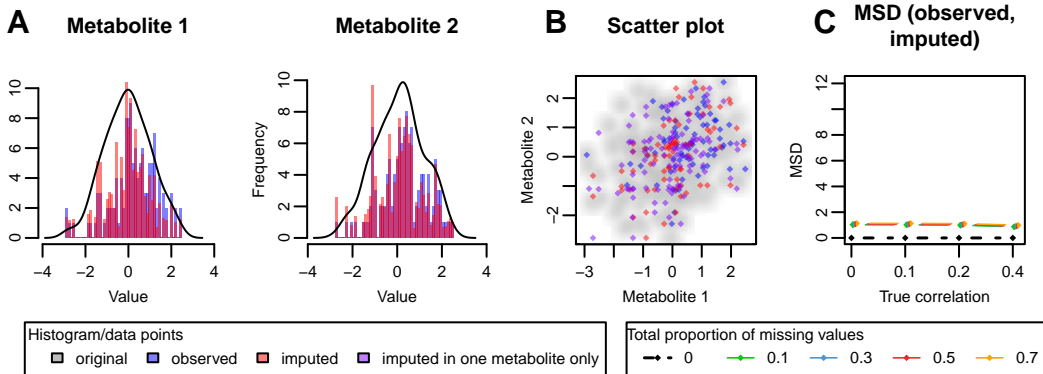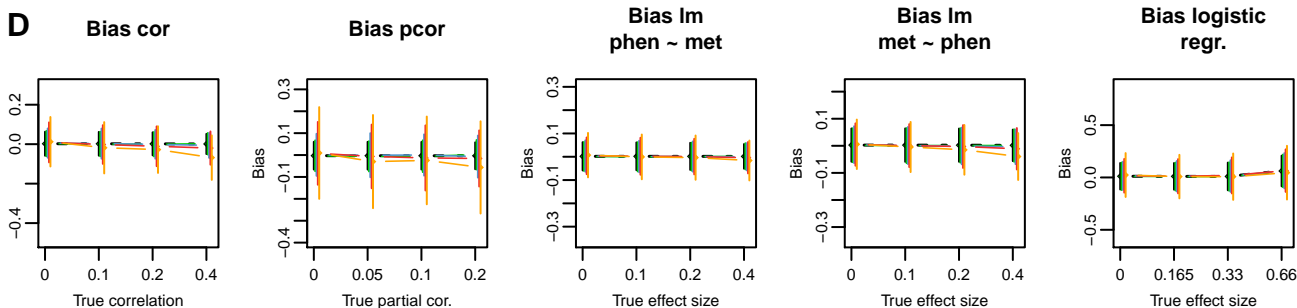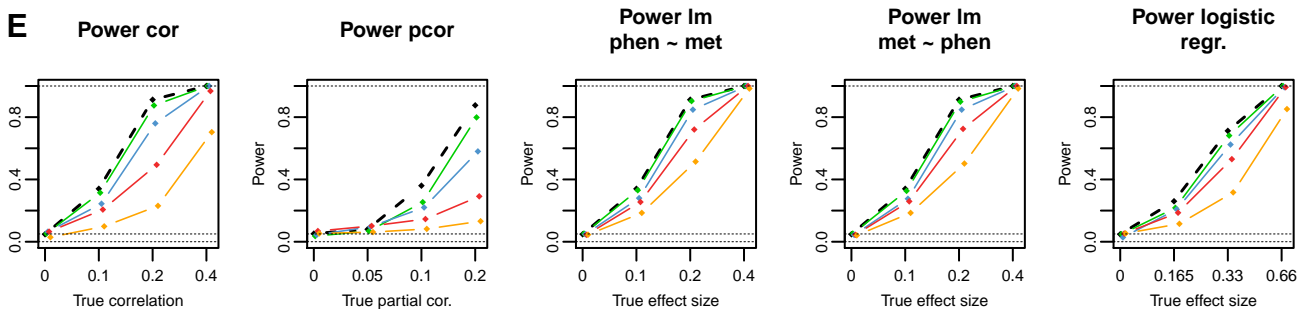

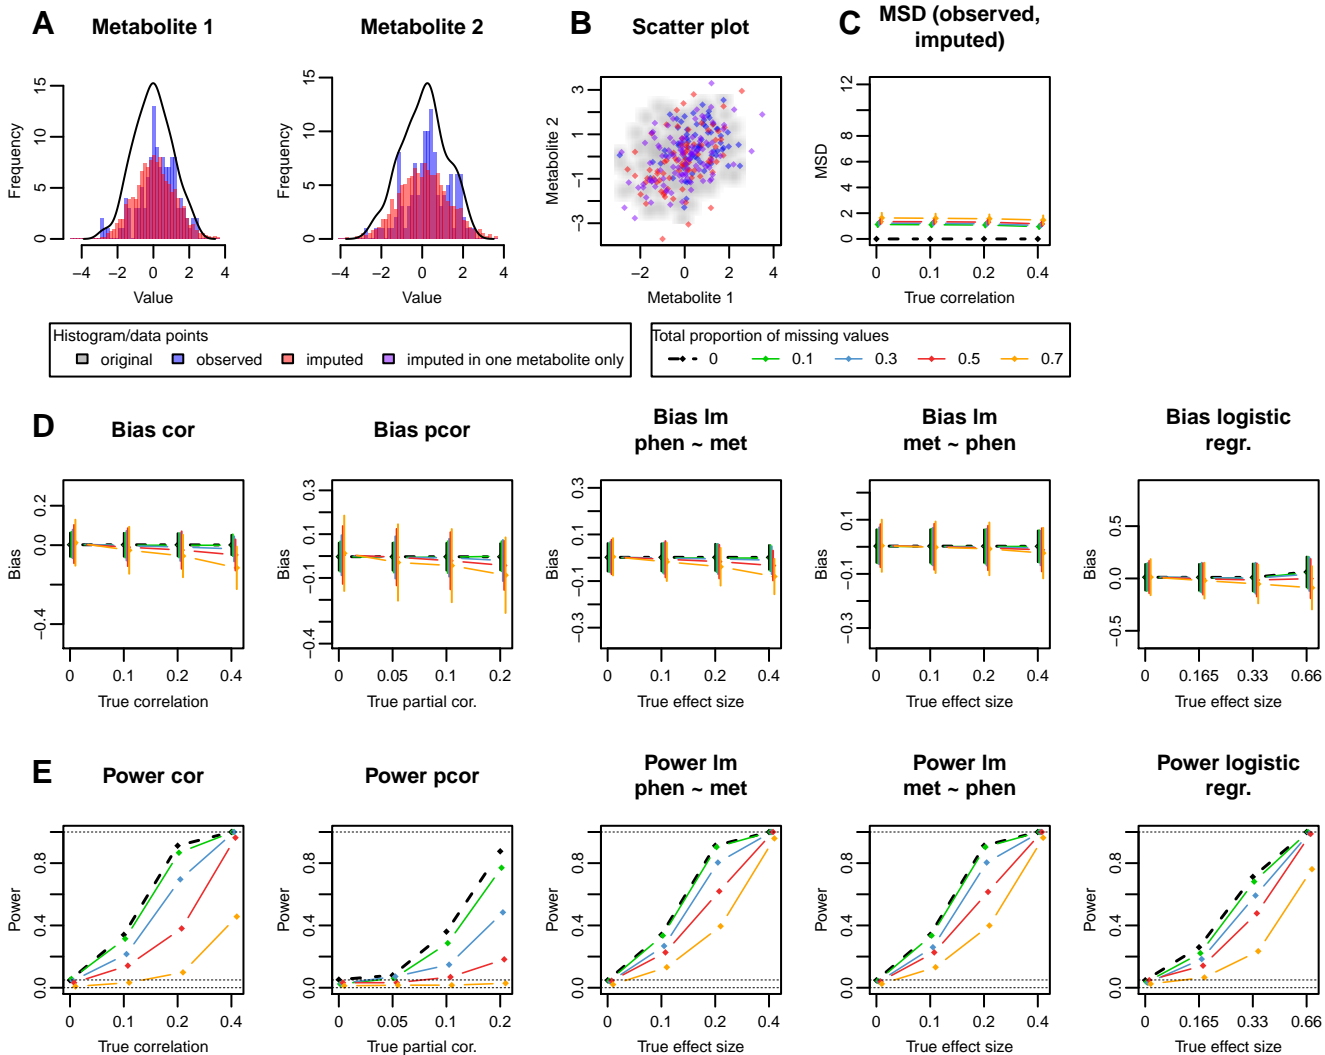

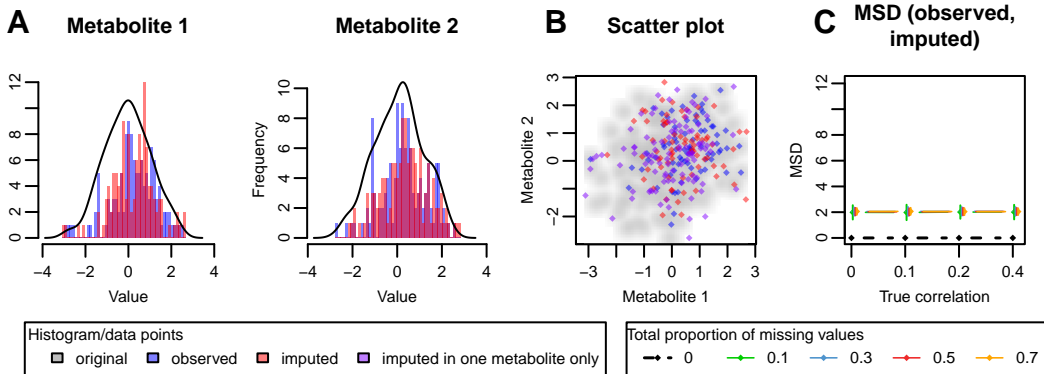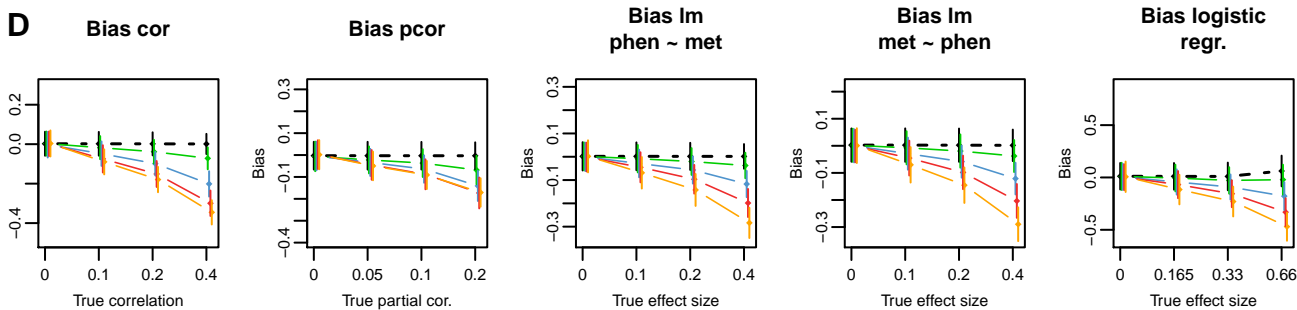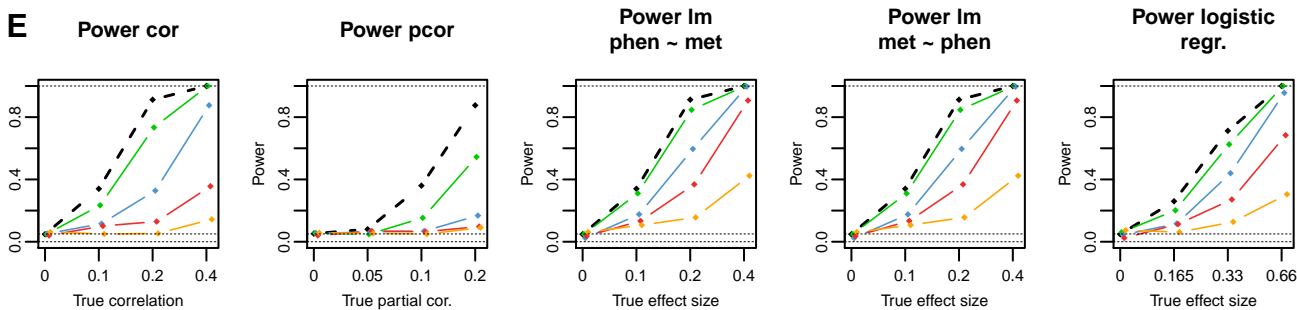

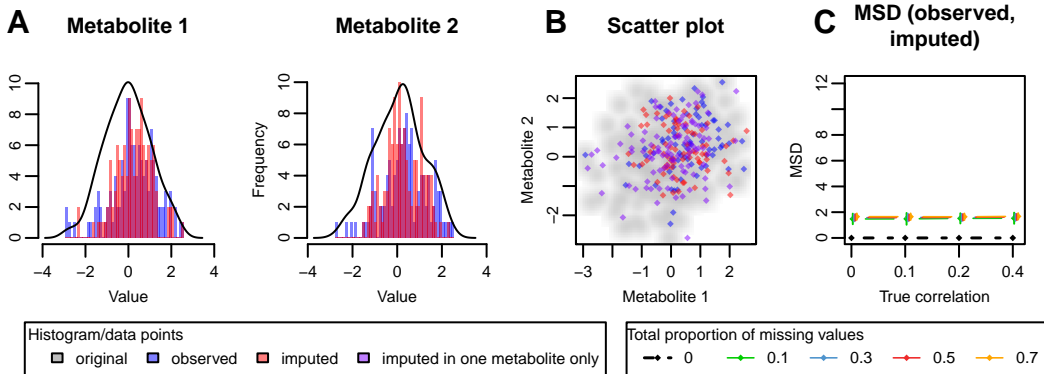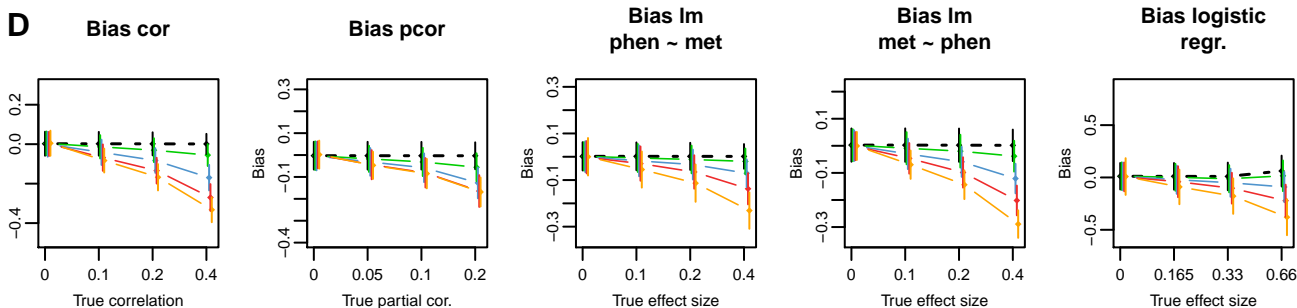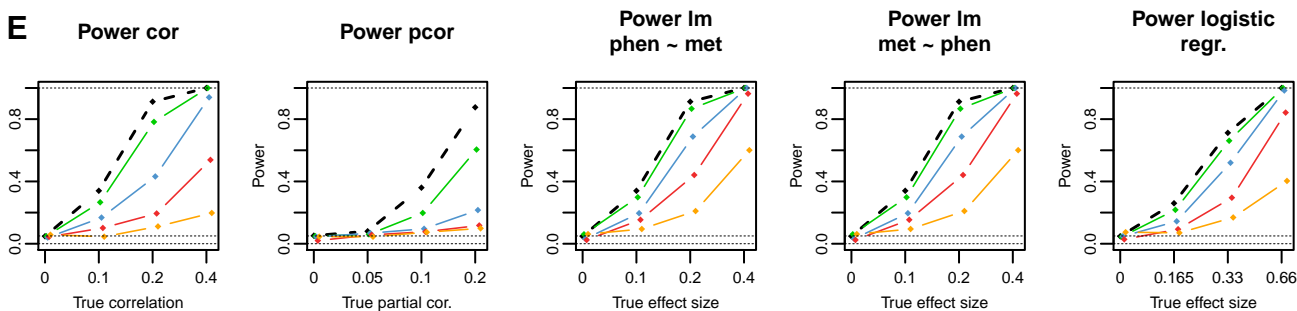

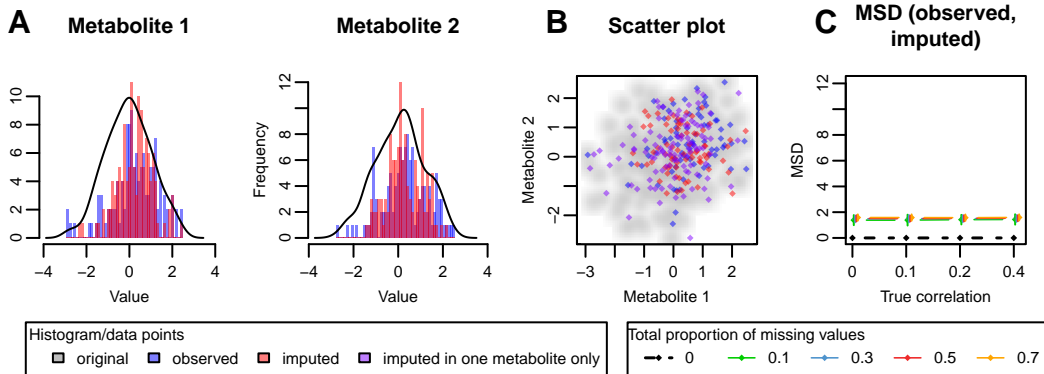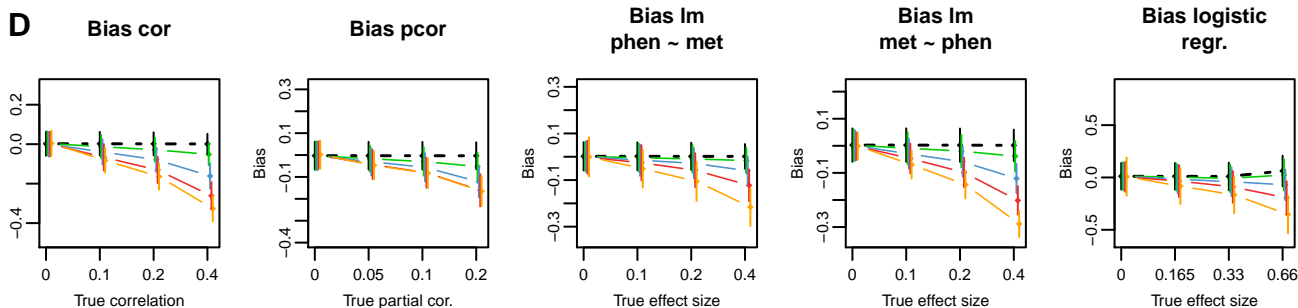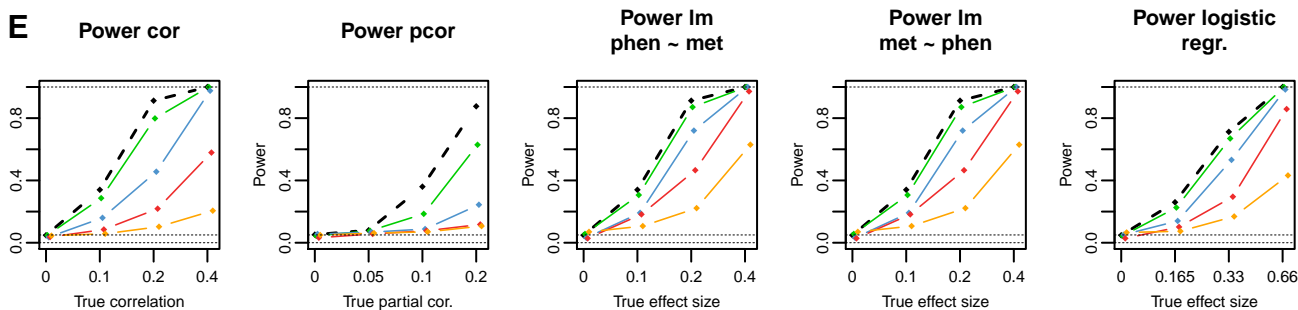

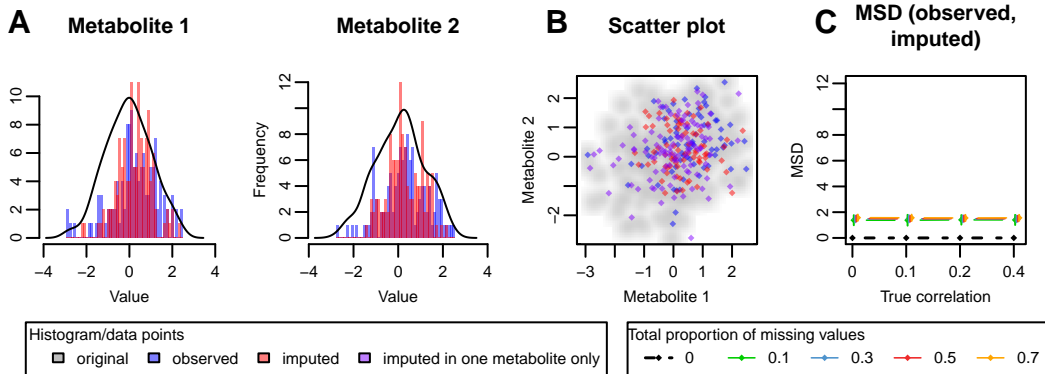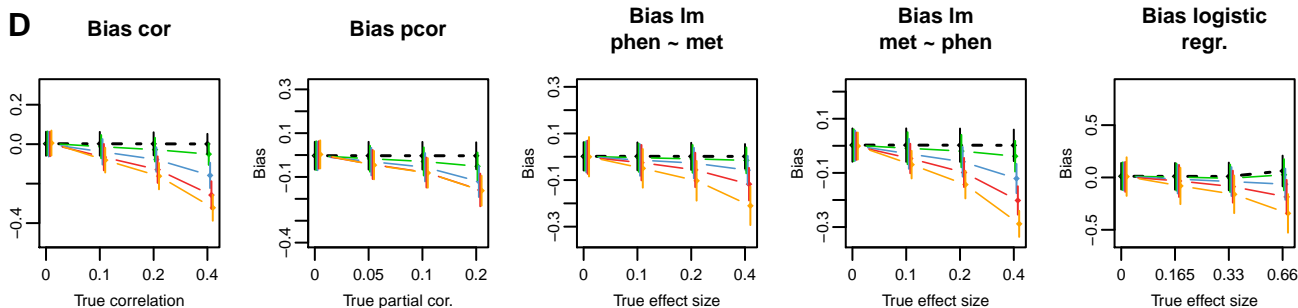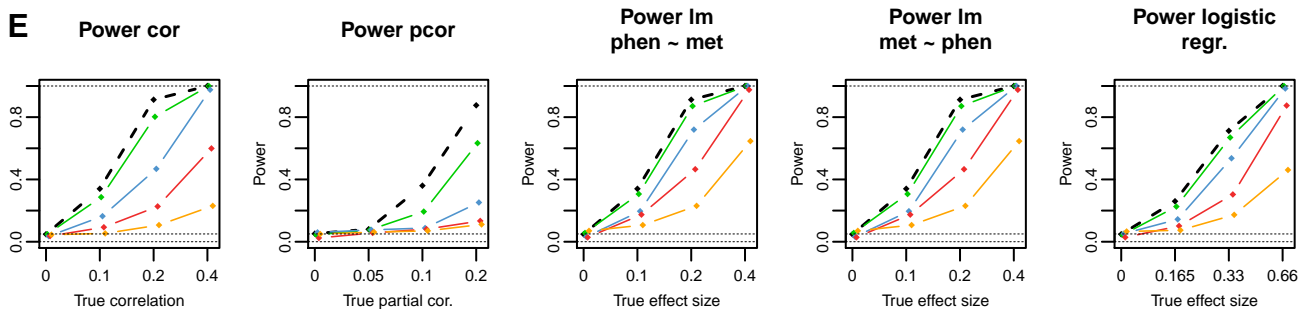



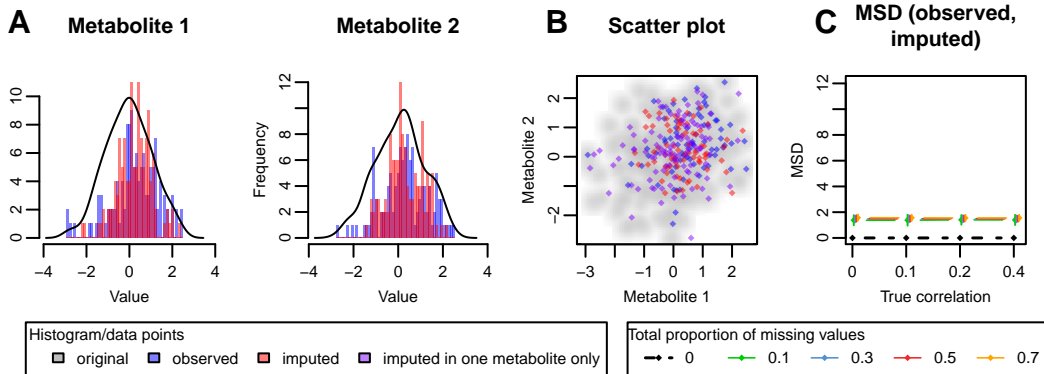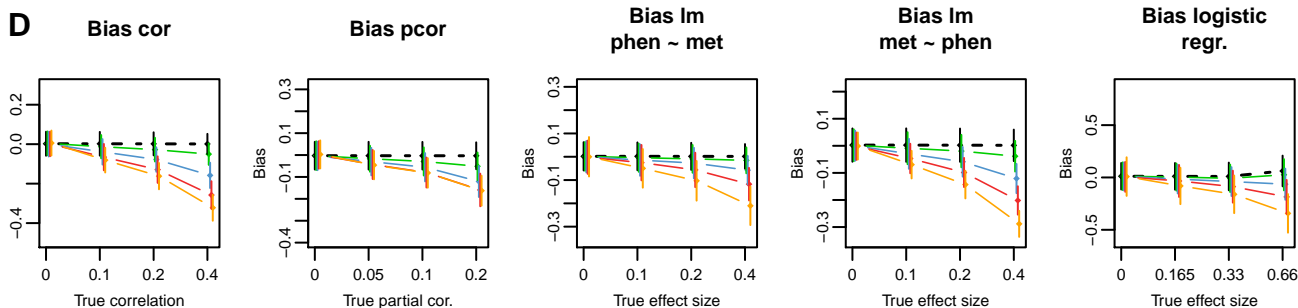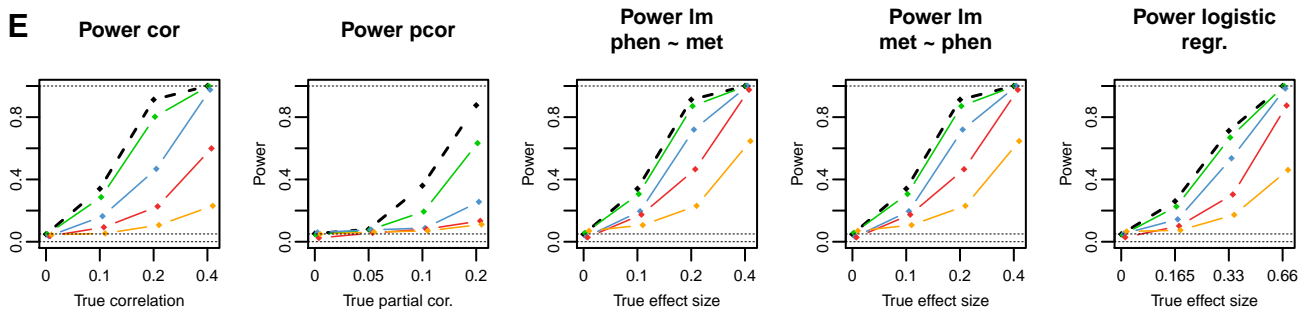

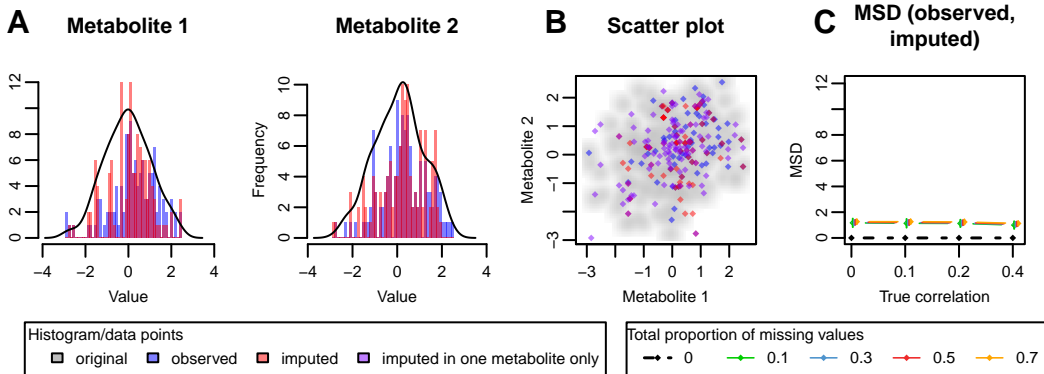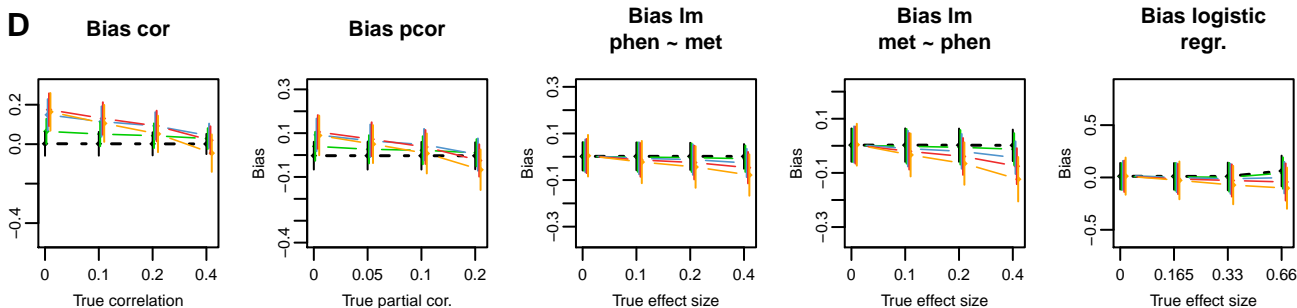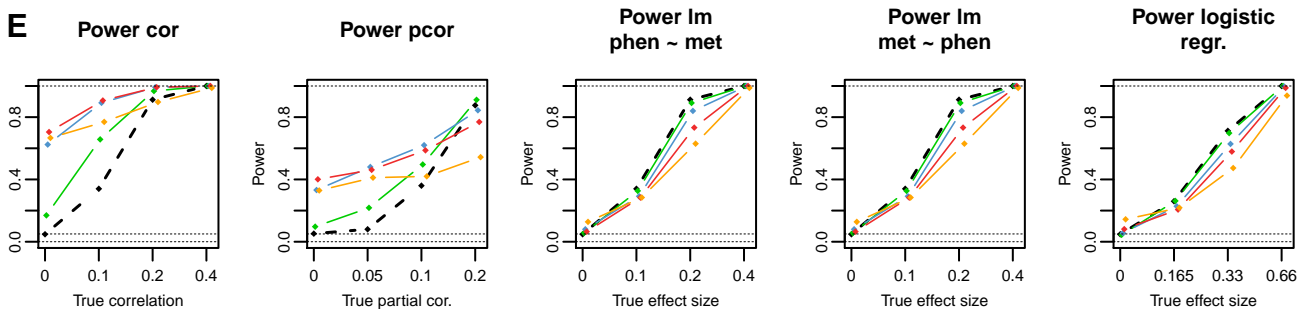

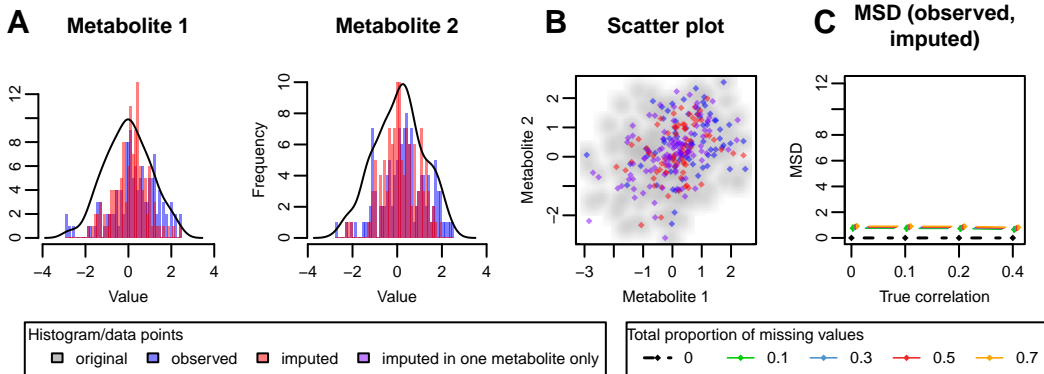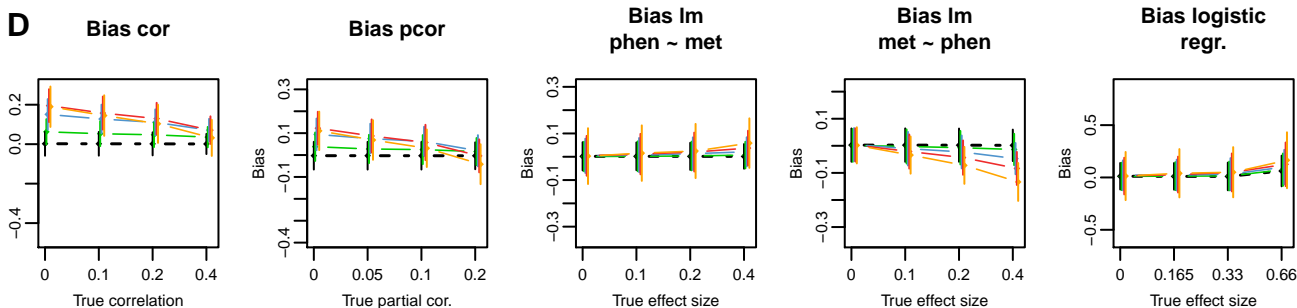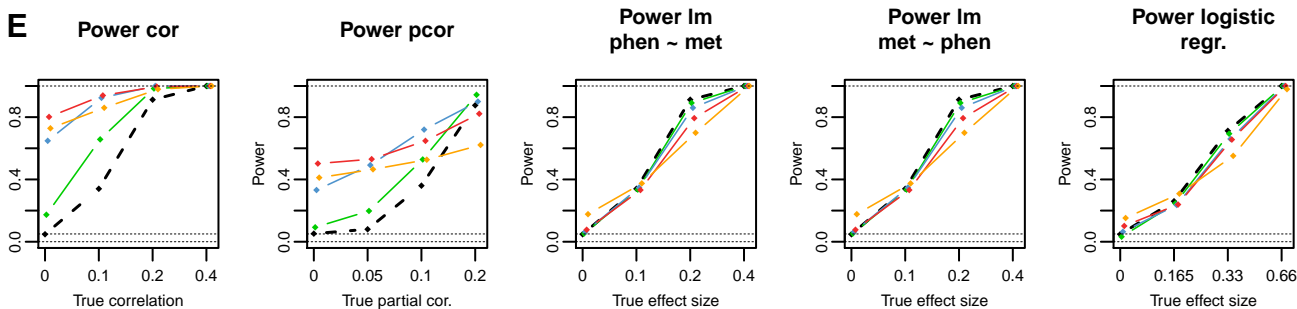

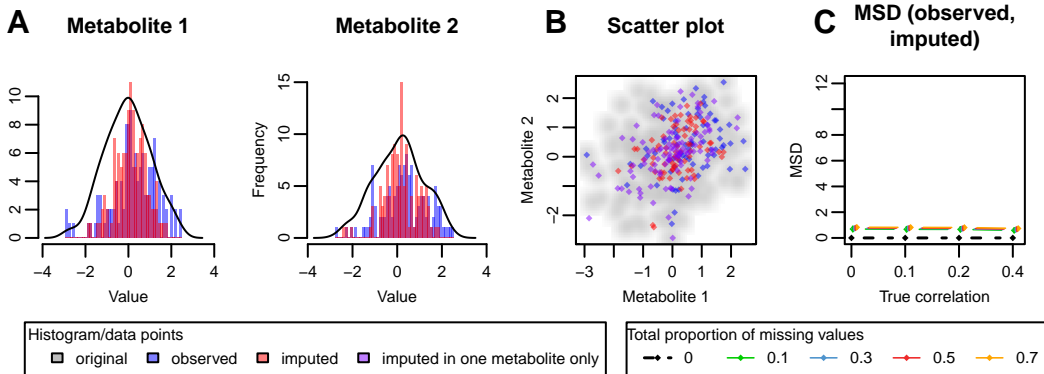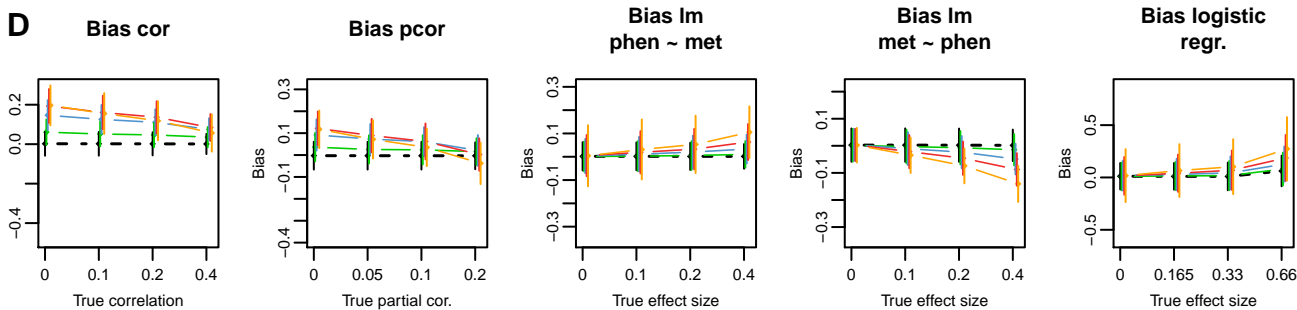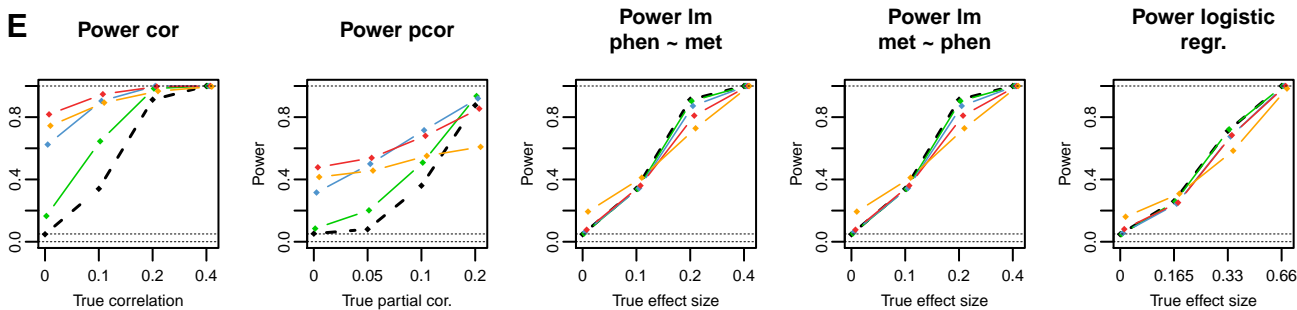

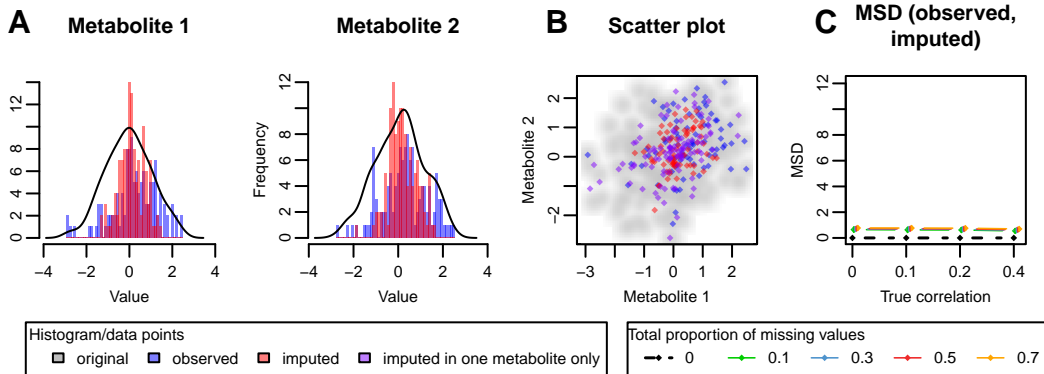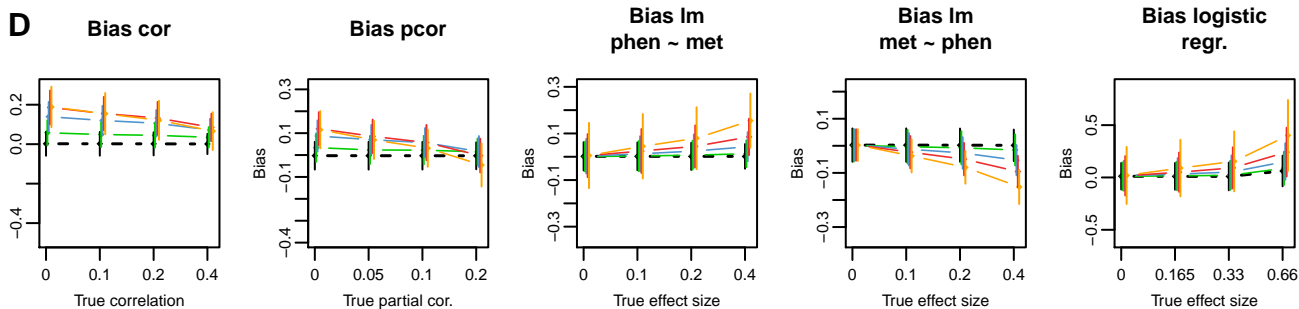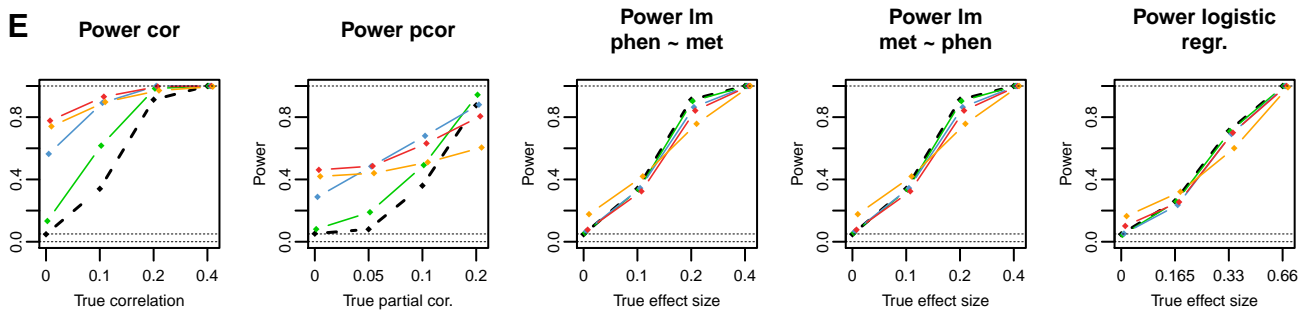

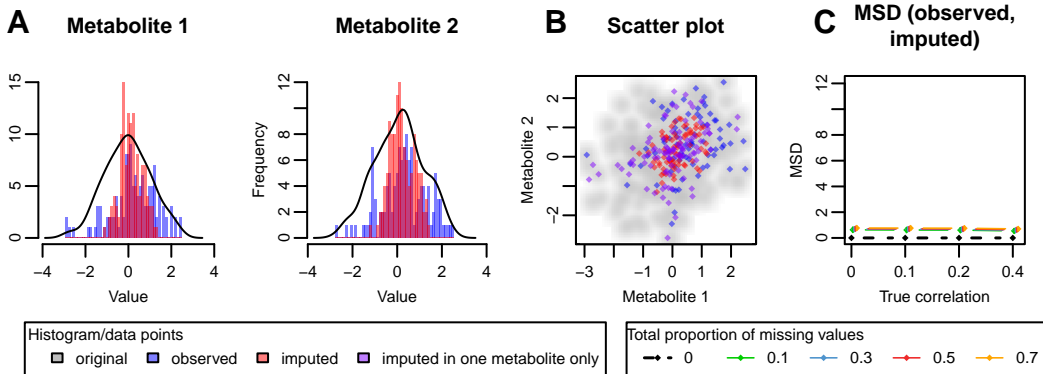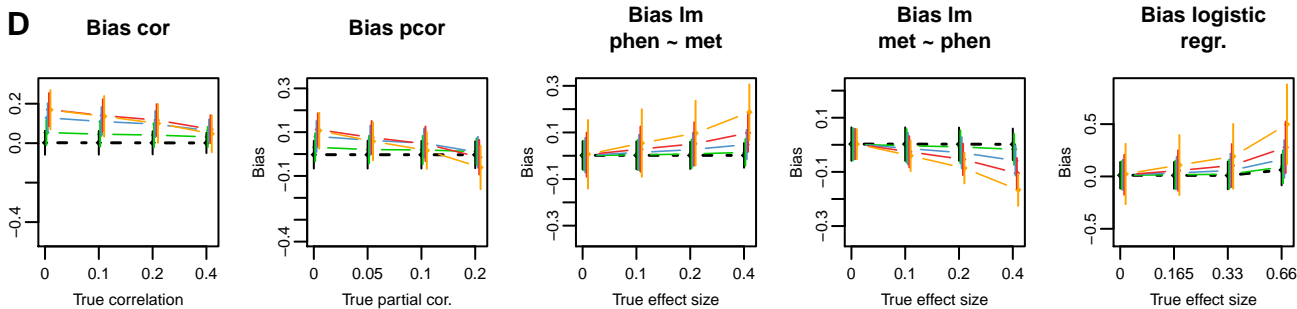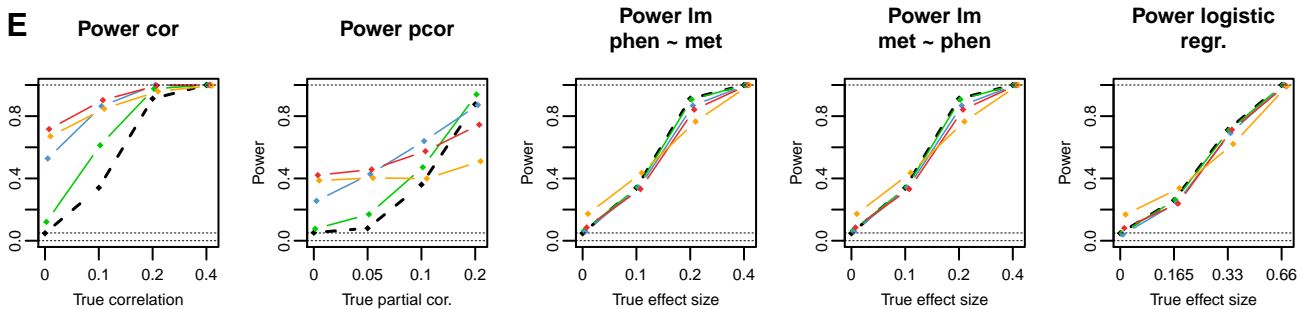

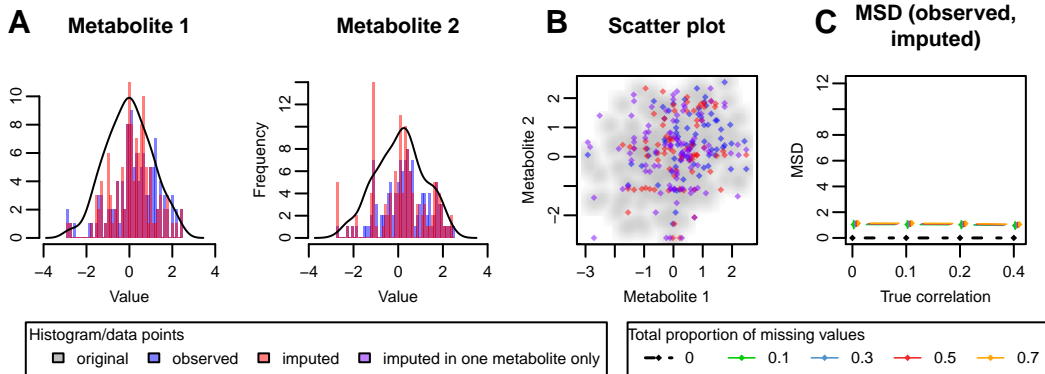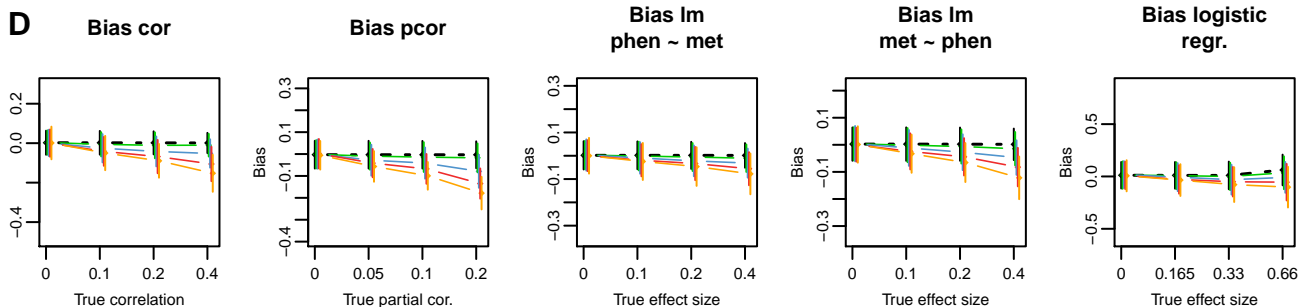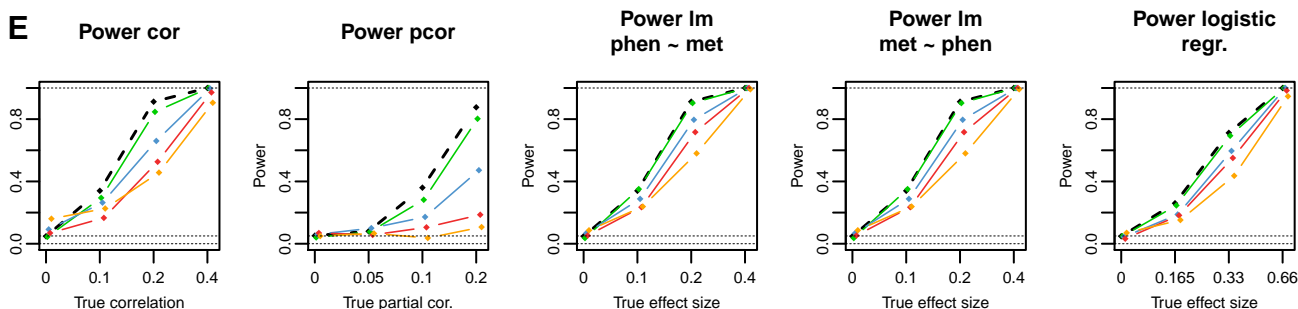

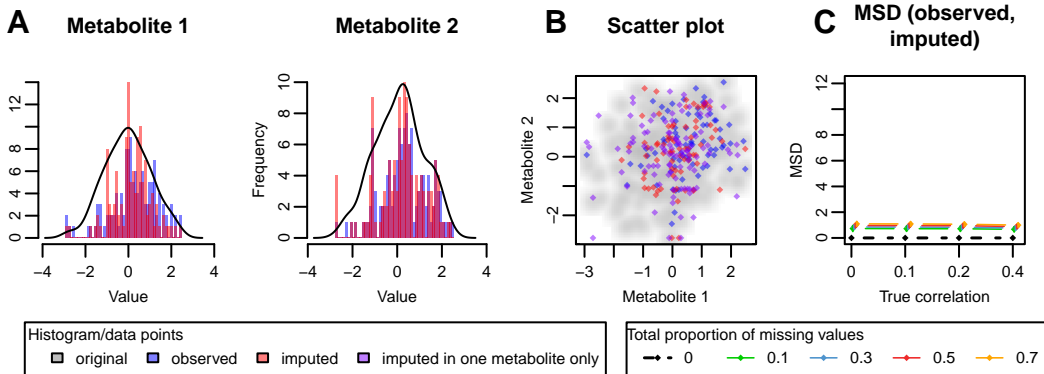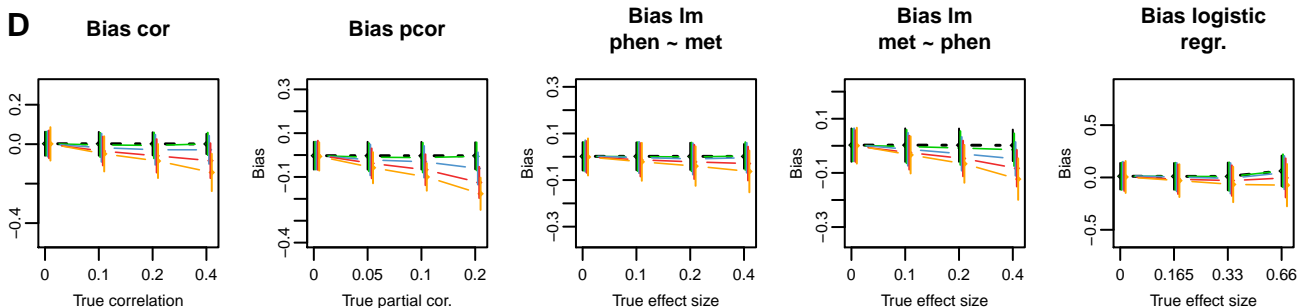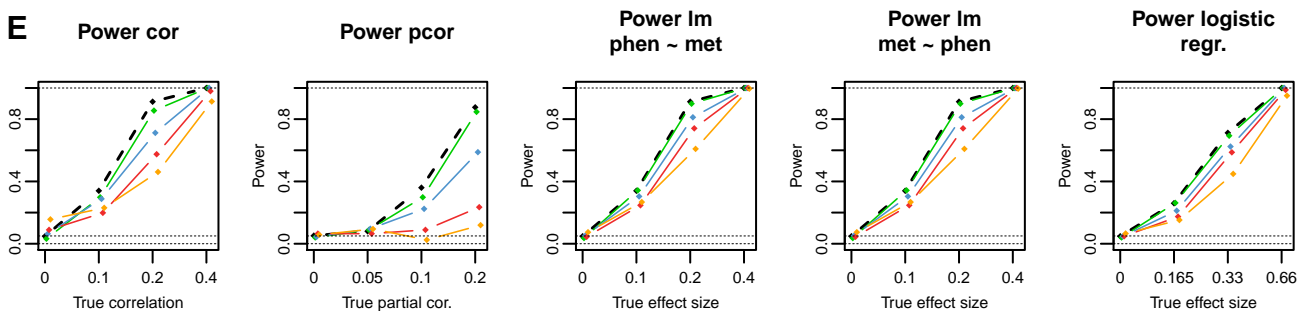



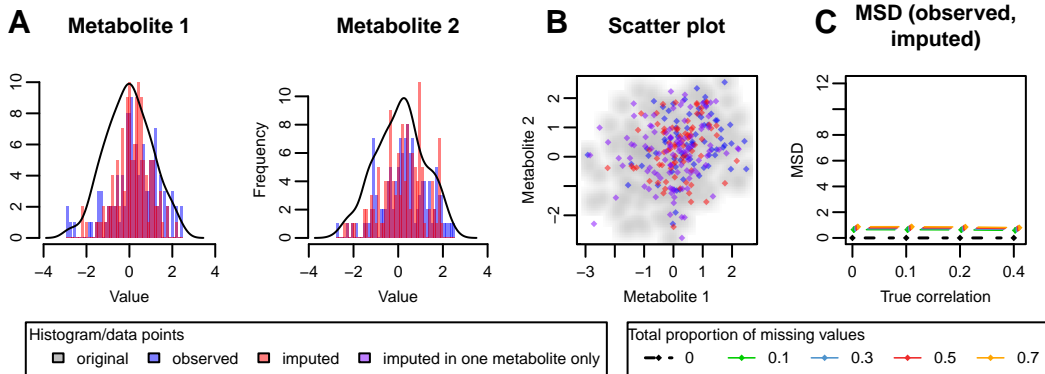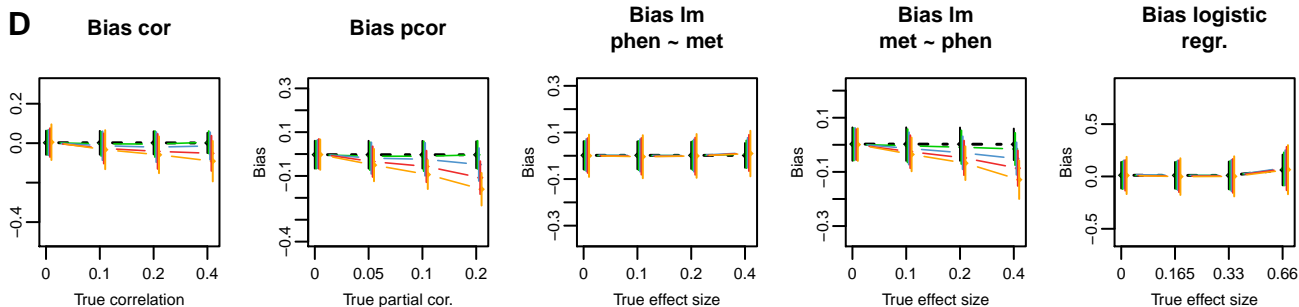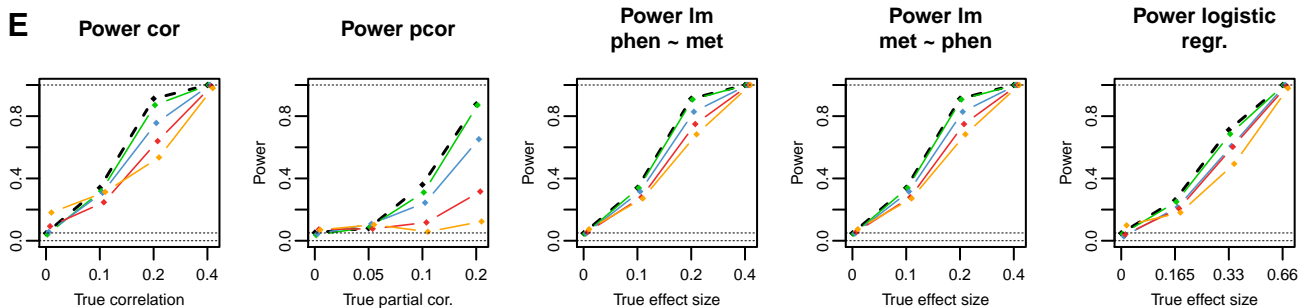

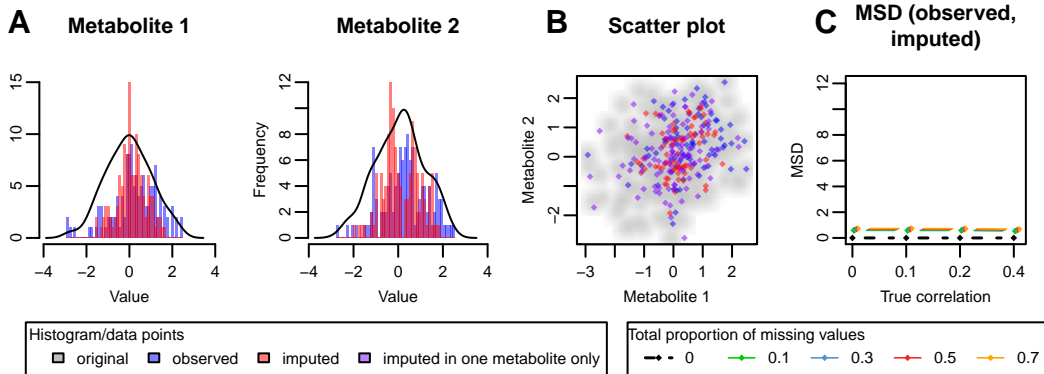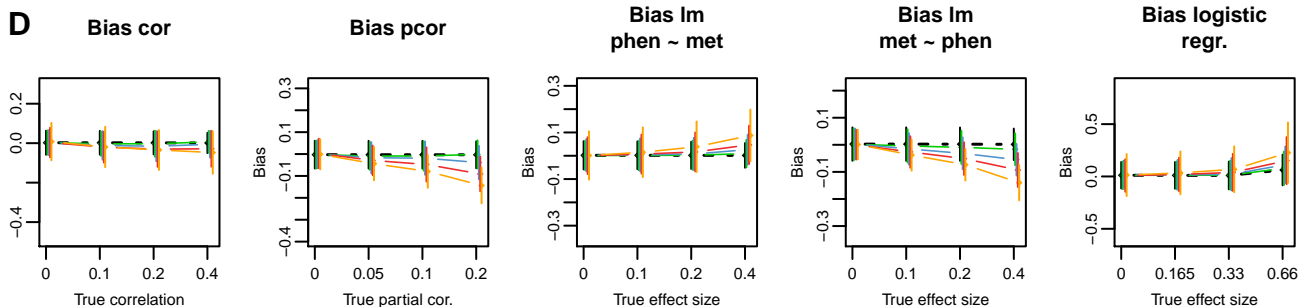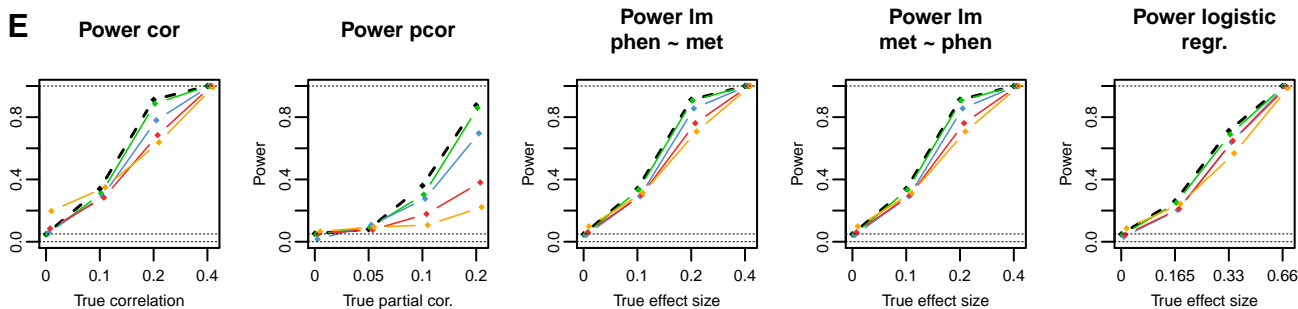

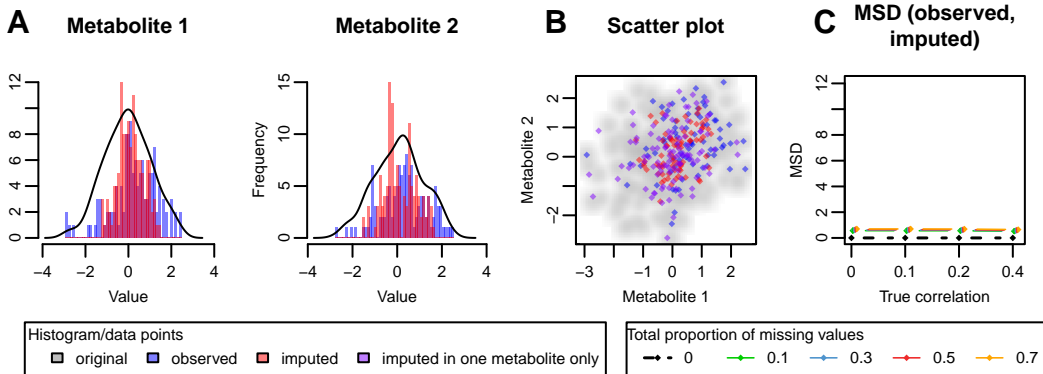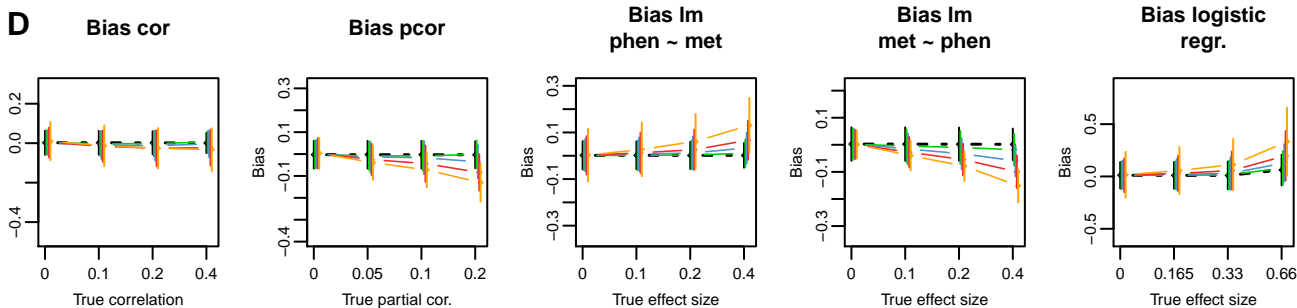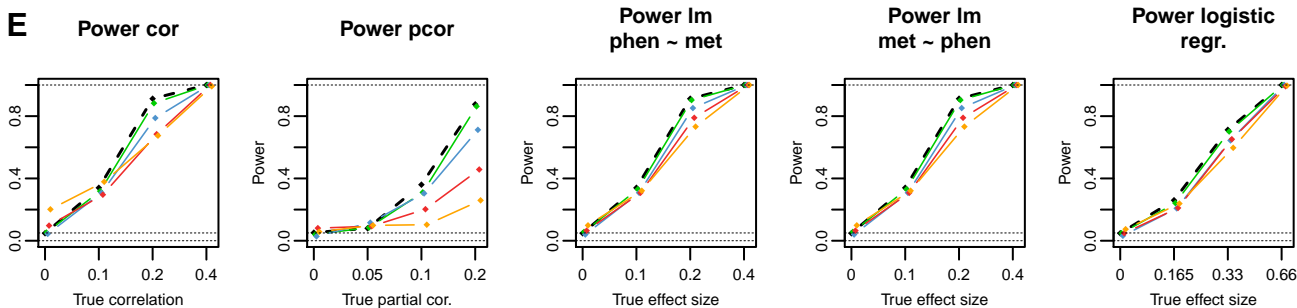

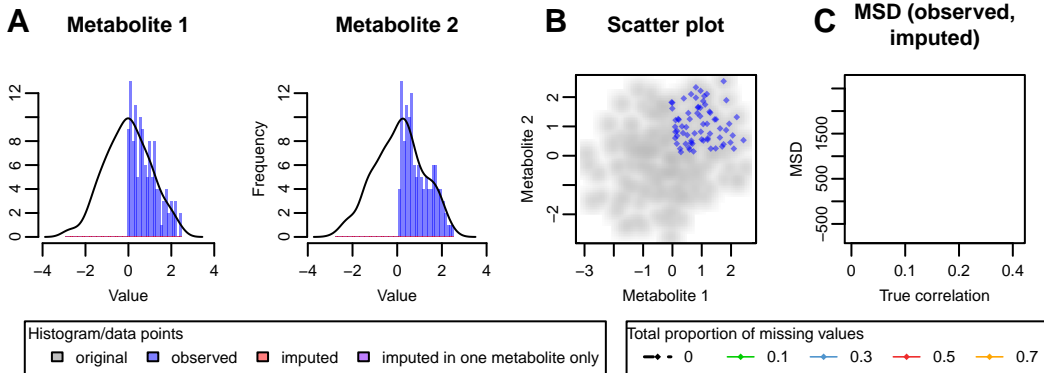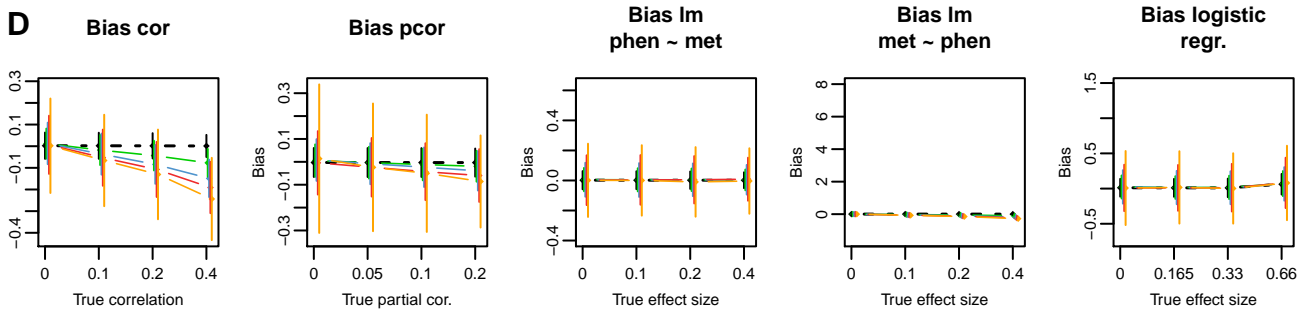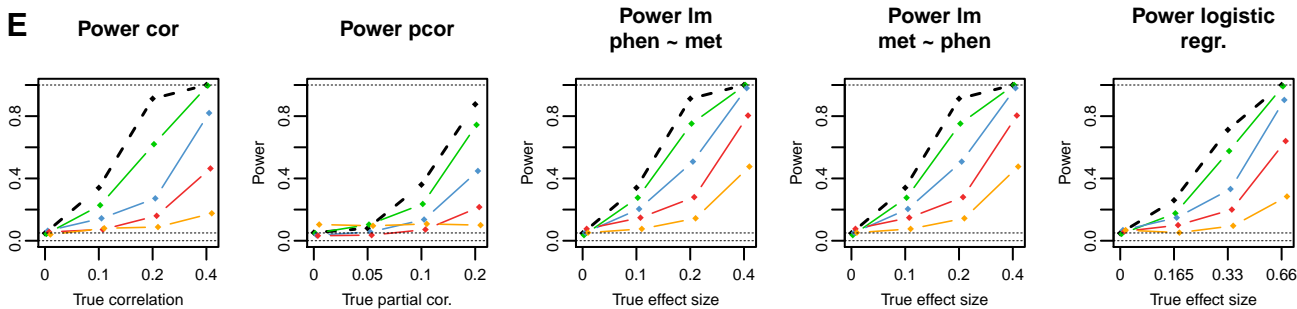

**A** Metabolite 1

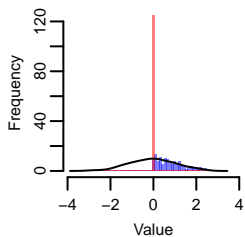

Metabolite 2

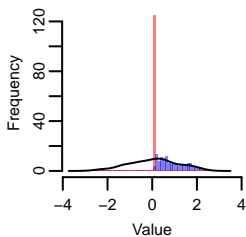

**B** Scatter plot

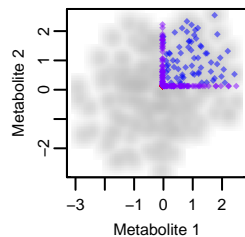

**C** MSD (observed, imputed)

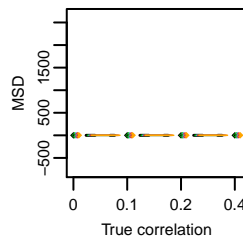

Histogram/data points  
 ■ original ■ observed ■ imputed ■ imputed in one metabolite only

Total proportion of missing values  
 ● - 0 ● 0.1 ● 0.3 ● 0.5 ● 0.7

**D** Bias cor

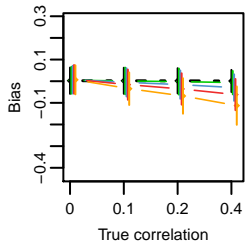

Bias pcor

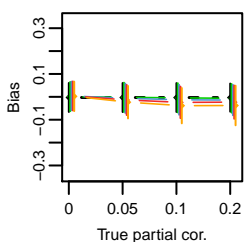

Bias lm phen ~ met

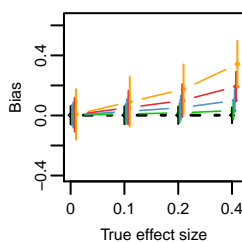

Bias lm met ~ phen

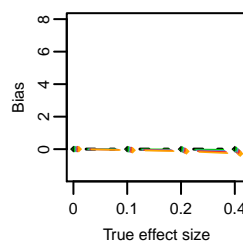

Bias logistic regr.

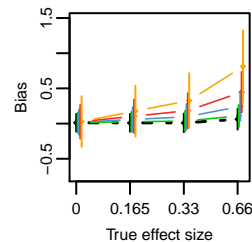

**E** Power cor

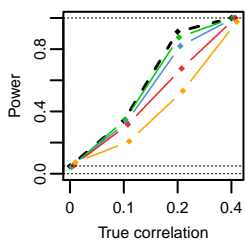

Power pcor

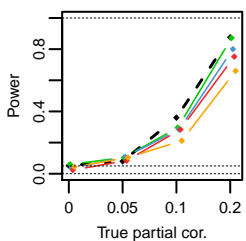

Power lm phen ~ met

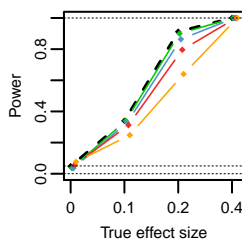

Power lm met ~ phen

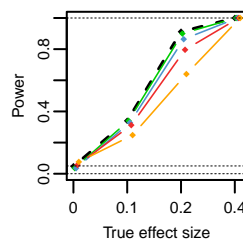

Power logistic regr.

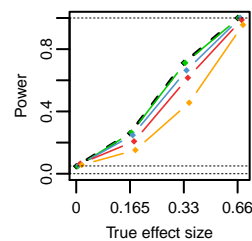

**A** Metabolite 1

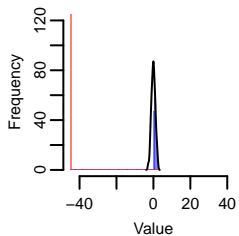

Metabolite 2

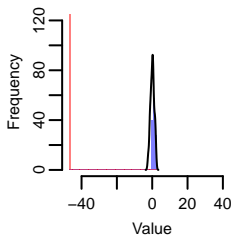

**B** Scatter plot

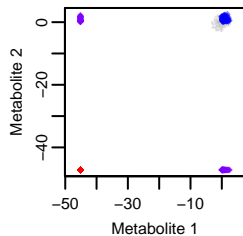

**C** MSD (observed, imputed)

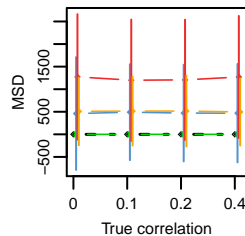

Histogram/data points  
 ■ original   ■ observed   ■ imputed   ■ imputed in one metabolite only

Total proportion of missing values  
 ● - 0   ● 0.1   ● 0.3   ● 0.5   ● 0.7

**D** Bias cor

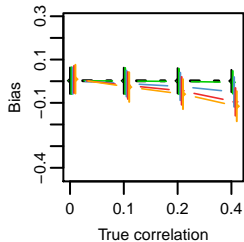

Bias pcor

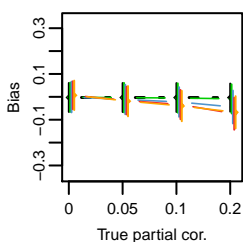

Bias lm phen ~ met

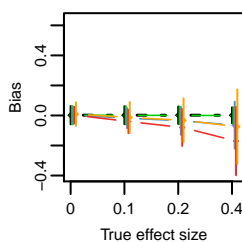

Bias lm met ~ phen

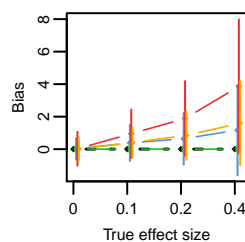

Bias logistic regr.

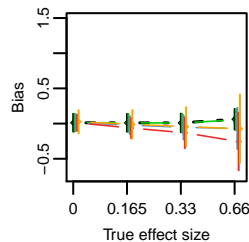

**E** Power cor

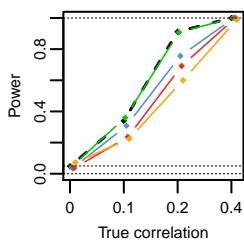

Power pcor

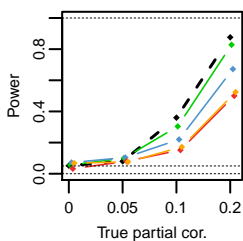

Power lm phen ~ met

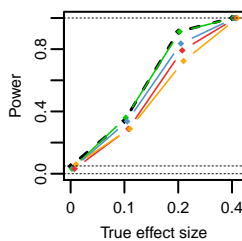

Power lm met ~ phen

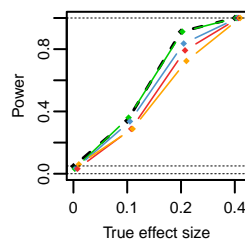

Power logistic regr.

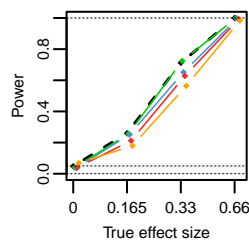

**A** Metabolite 1

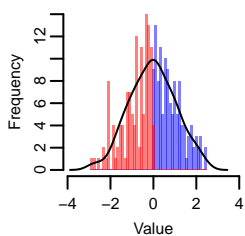

Metabolite 2

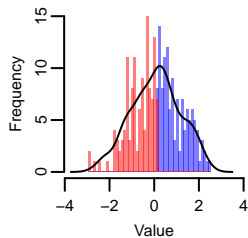

**B** Scatter plot

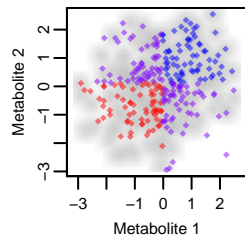

**C** MSD (observed, imputed)

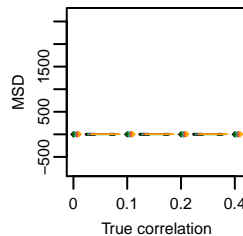

Histogram/data points  
 ■ original ■ observed ■ imputed ■ imputed in one metabolite only

Total proportion of missing values  
 ● 0 ● 0.1 ● 0.3 ● 0.5 ● 0.7

**D** Bias cor

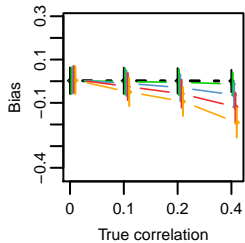

Bias pcor

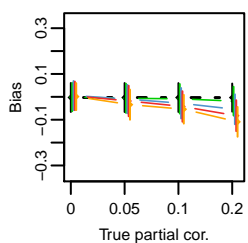

Bias lm phen ~ met

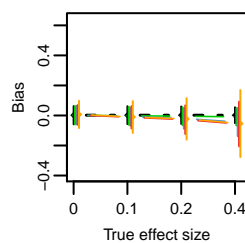

Bias lm met ~ phen

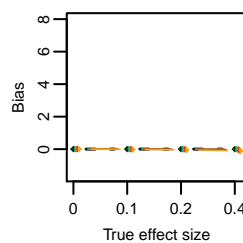

Bias logistic regr.

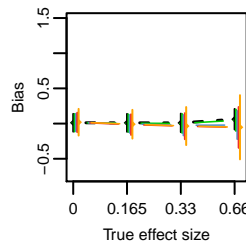

**E** Power cor

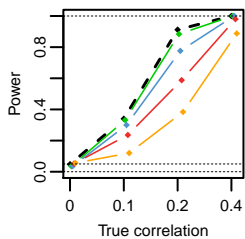

Power pcor

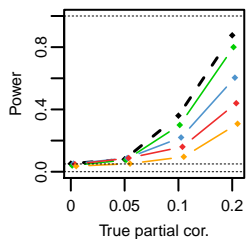

Power lm phen ~ met

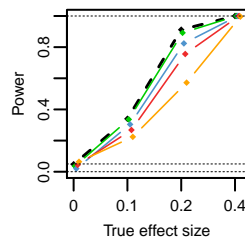

Power lm met ~ phen

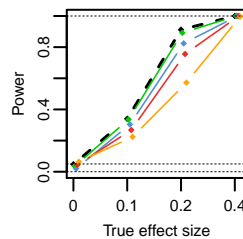

Power logistic regr.

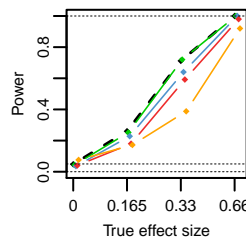

**A** Metabolite 1

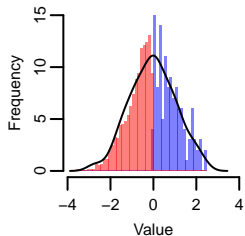

Metabolite 2

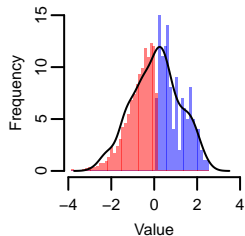

**B** Scatter plot

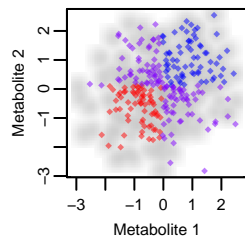

**C** MSD (observed, imputed)

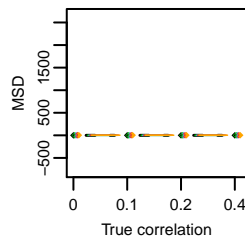

Histogram/data points  
 ■ original ■ observed ■ imputed ■ imputed in one metabolite only

Total proportion of missing values  
 ● 0 ● 0.1 ● 0.3 ● 0.5 ● 0.7

**D** Bias cor

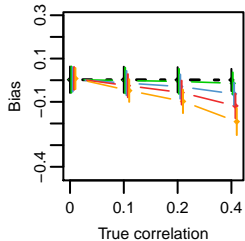

Bias pcor

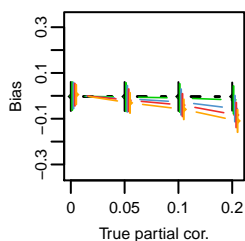

Bias lm phen ~ met

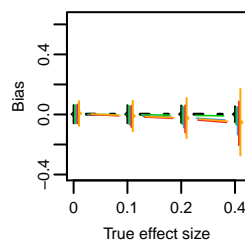

Bias lm met ~ phen

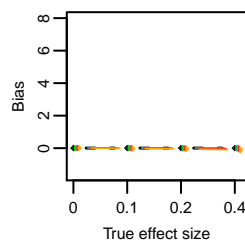

Bias logistic regr.

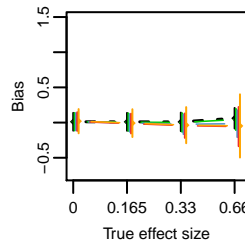

**E** Power cor

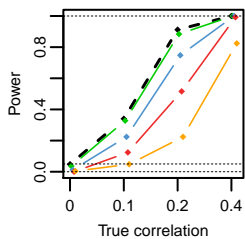

Power pcor

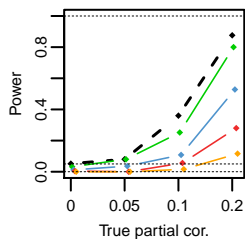

Power lm phen ~ met

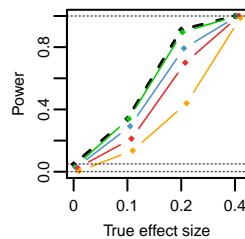

Power lm met ~ phen

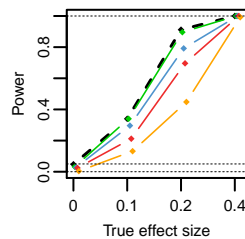

Power logistic regr.

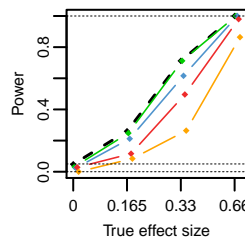



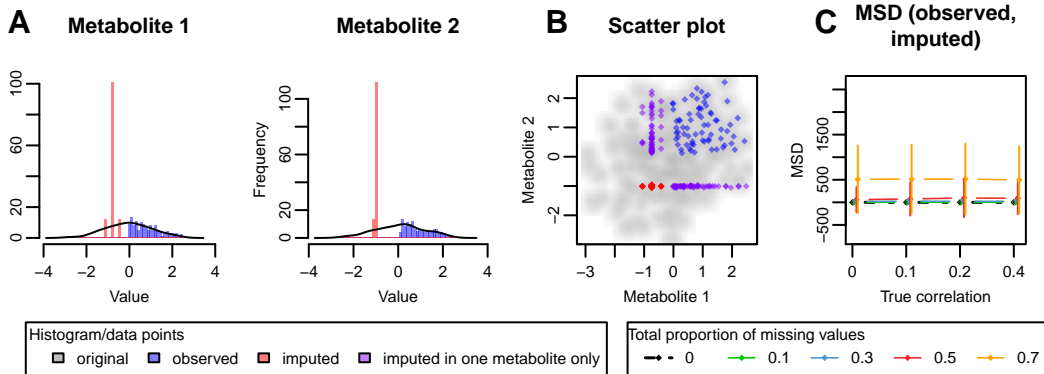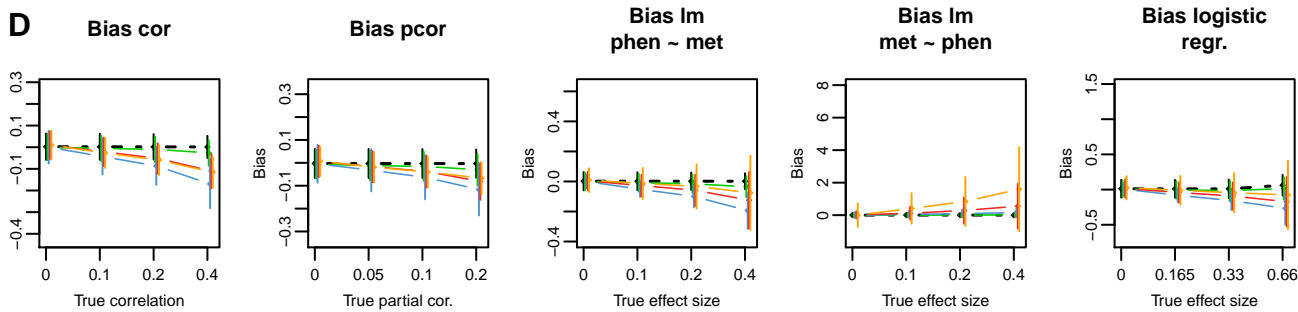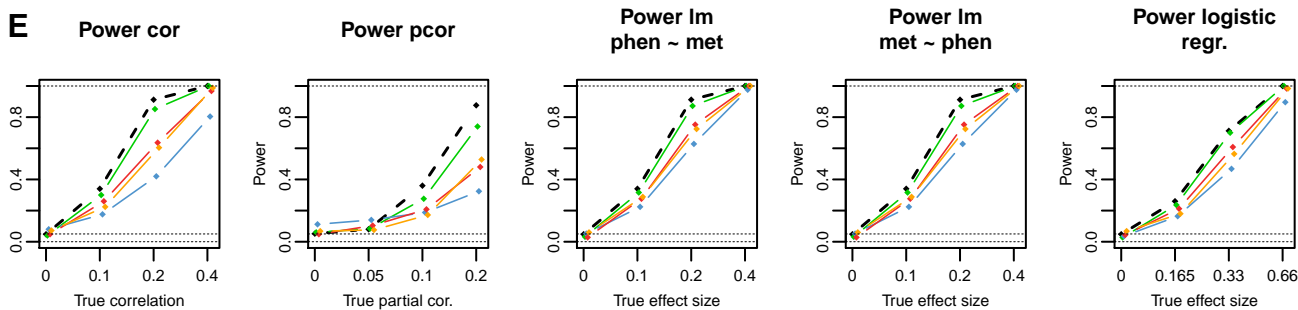

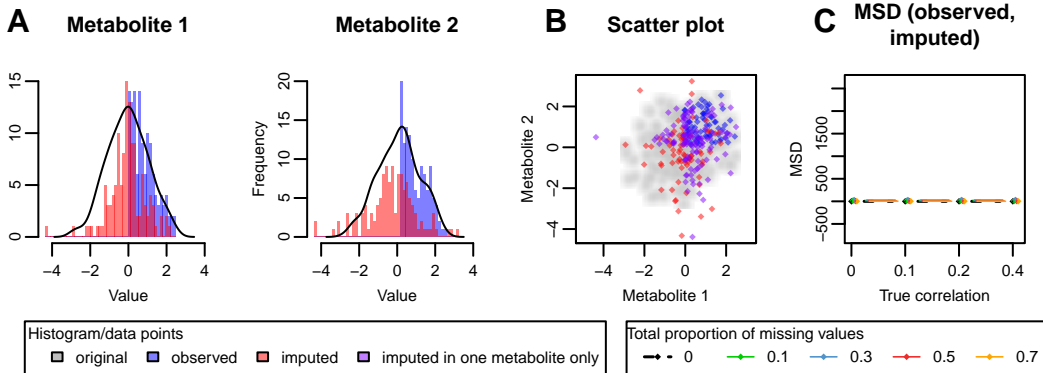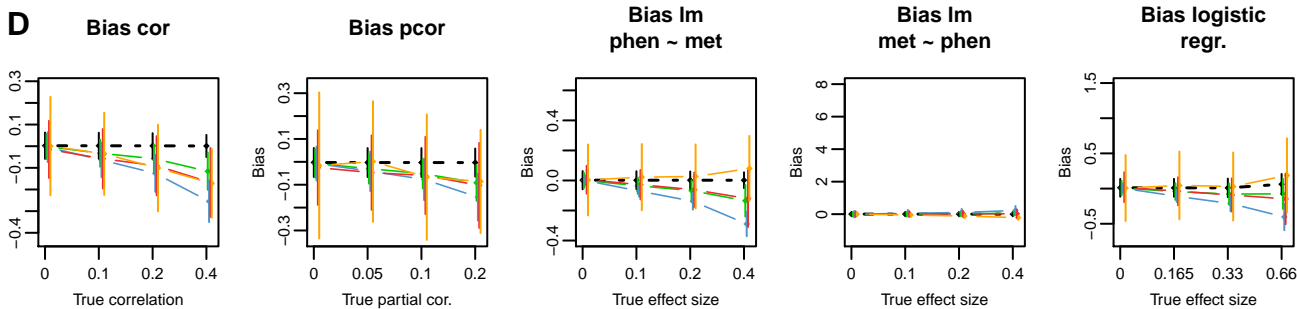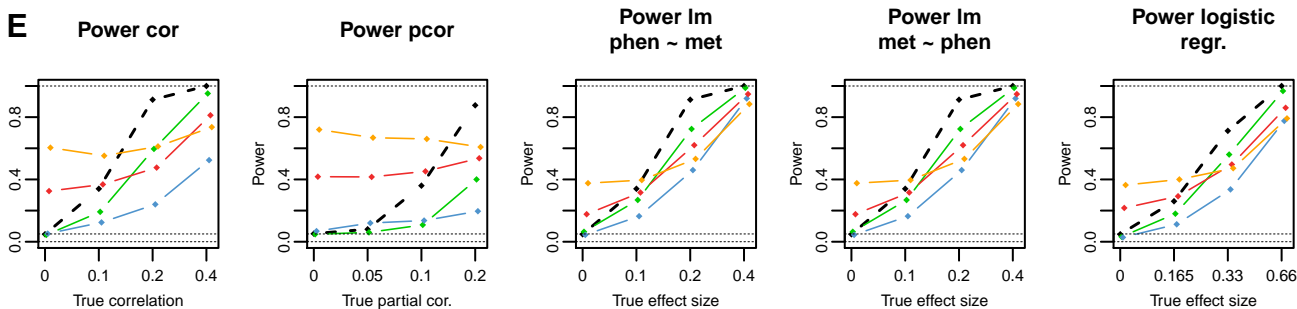

**A** Metabolite 1

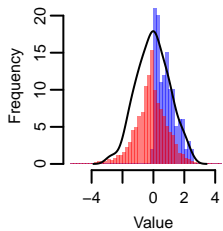

Metabolite 2

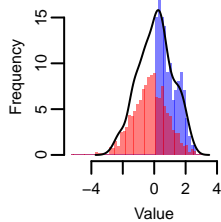

**B** Scatter plot

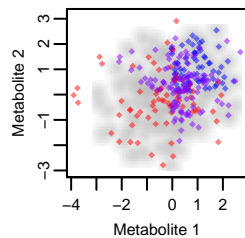

**C** MSD (observed, imputed)

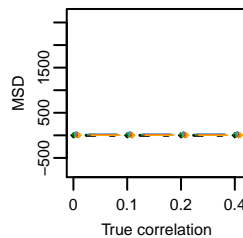

Histogram/data points  
 ■ original ■ observed ■ imputed ■ imputed in one metabolite only

Total proportion of missing values  
 ● - 0 ● 0.1 ● 0.3 ● 0.5 ● 0.7

**D** Bias cor

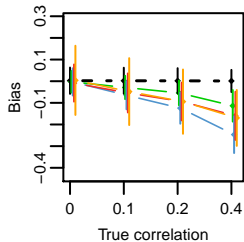

Bias pcor

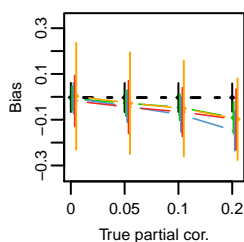

Bias lm phen ~ met

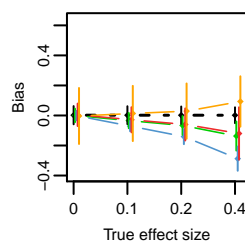

Bias lm met ~ phen

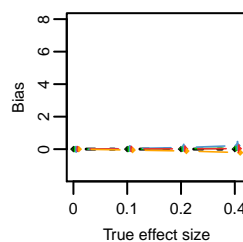

Bias logistic regr.

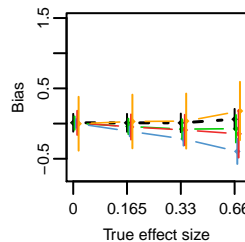

**E** Power cor

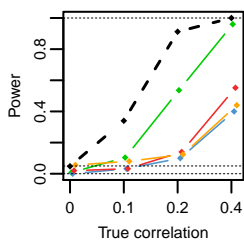

Power pcor

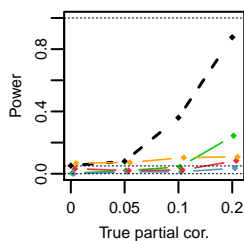

Power lm phen ~ met

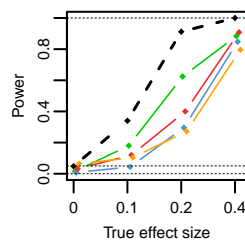

Power lm met ~ phen

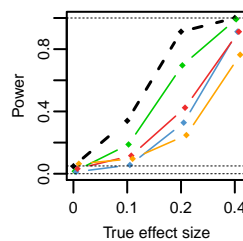

Power logistic regr.

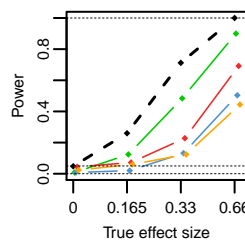

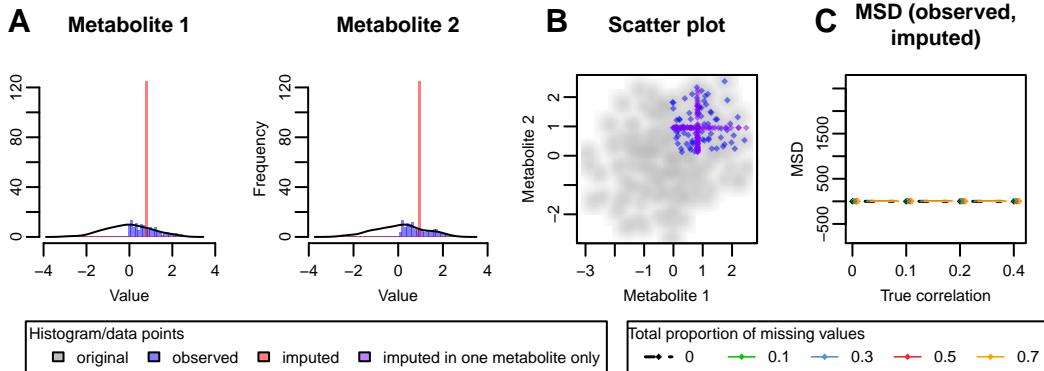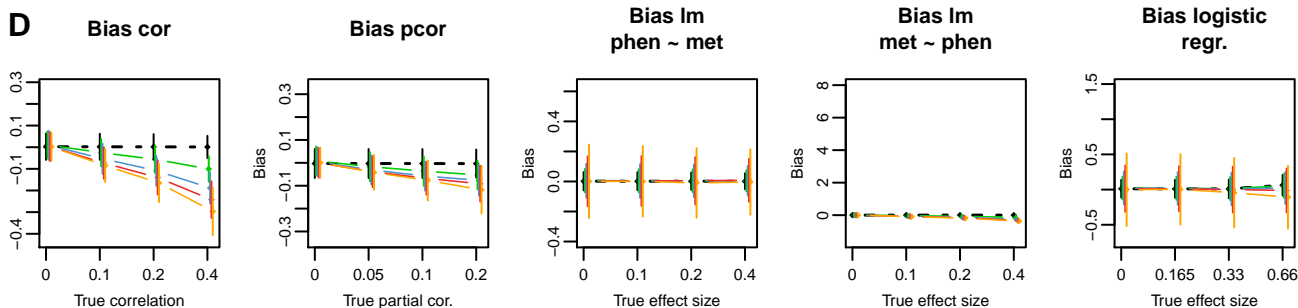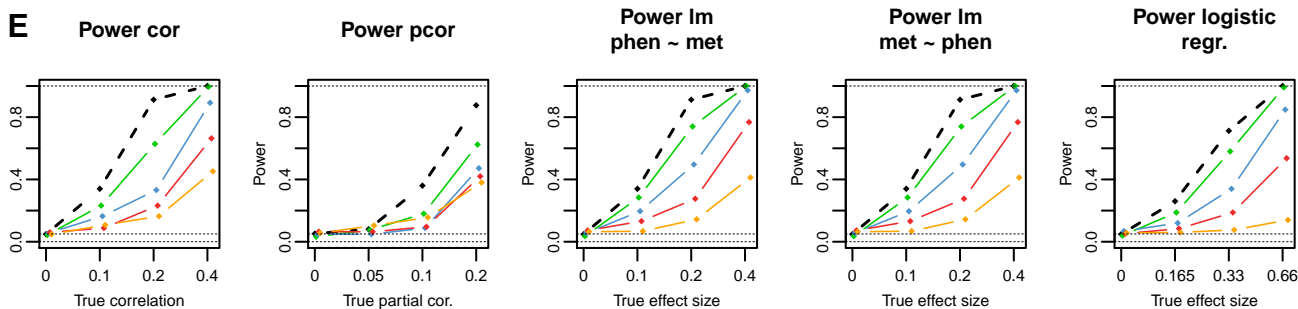

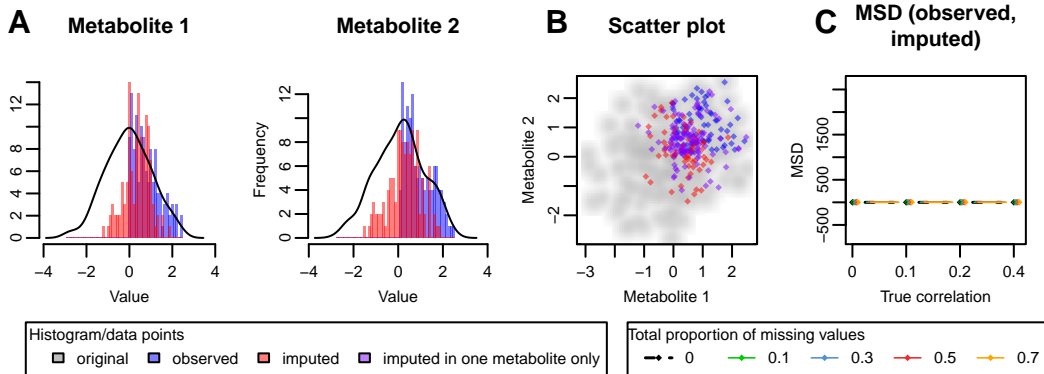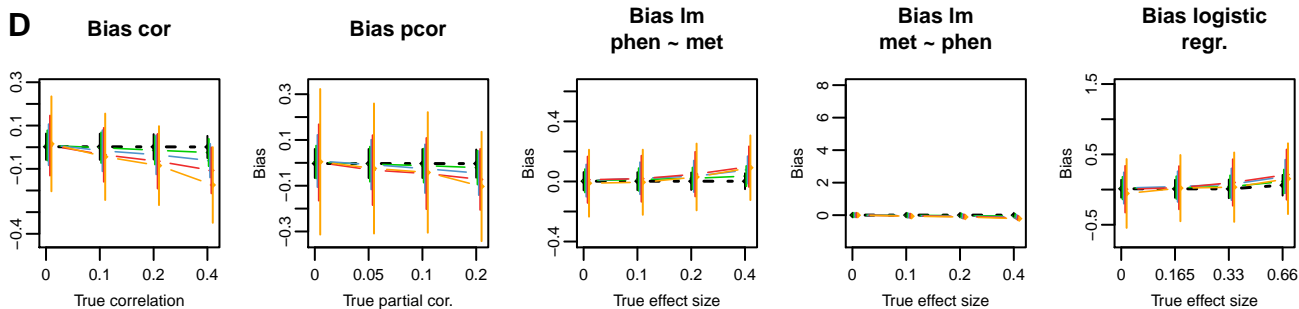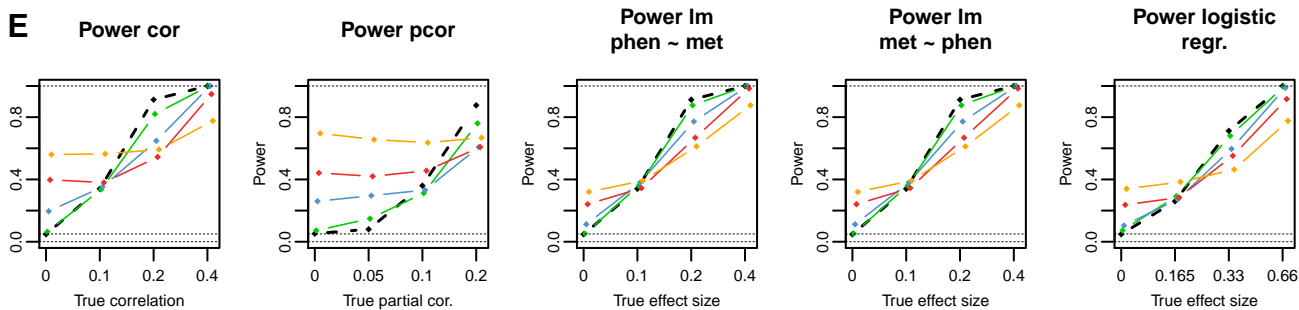

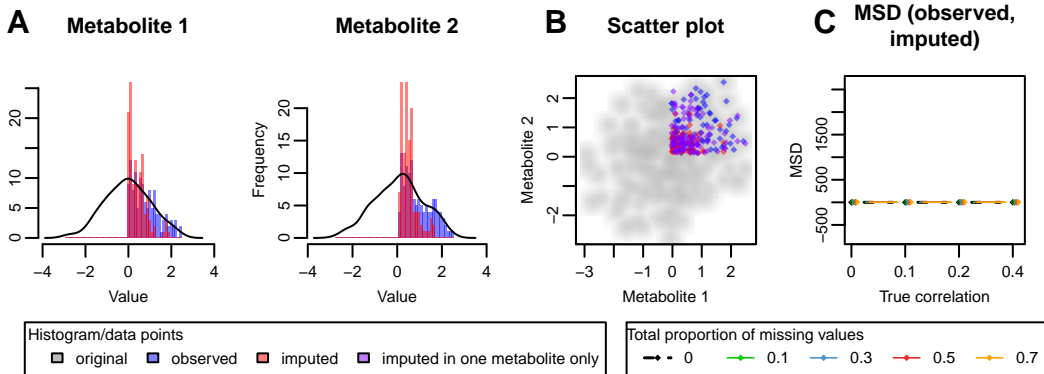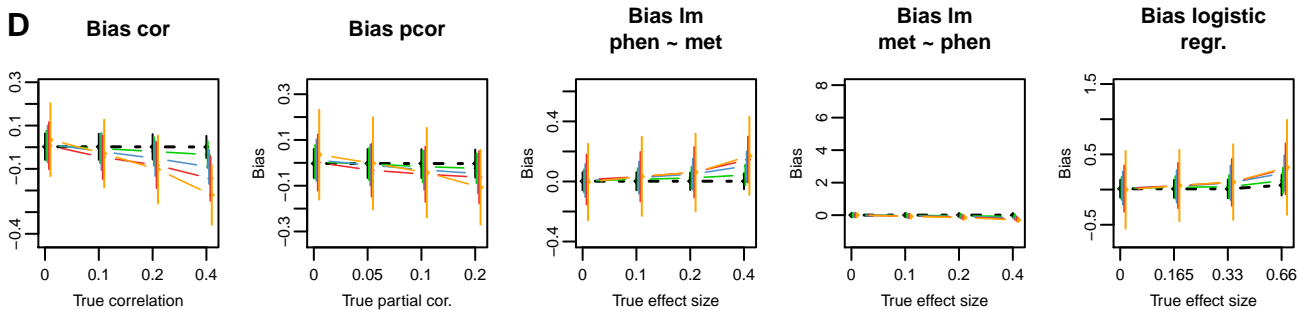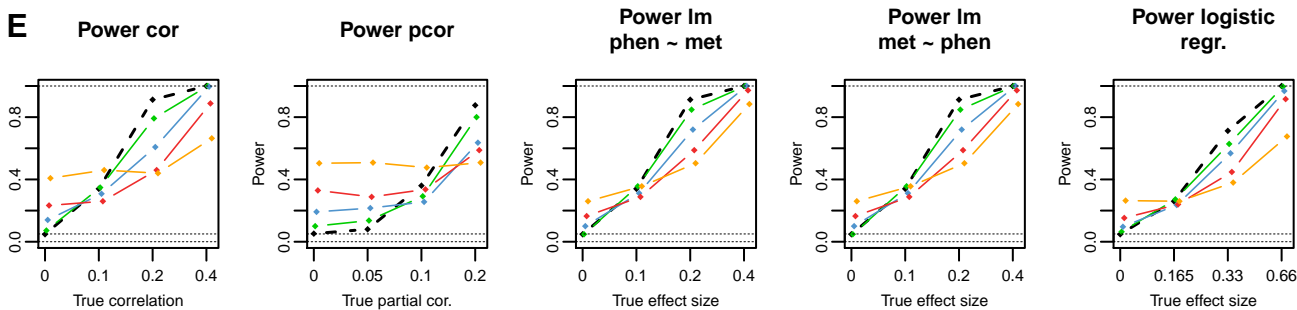

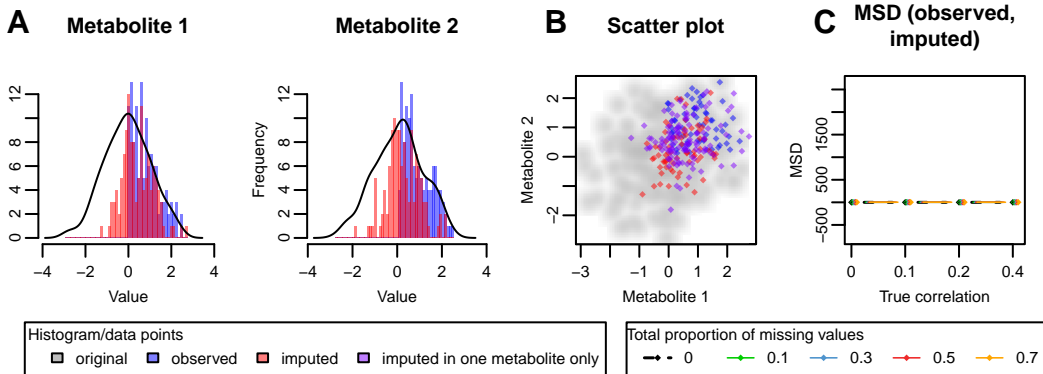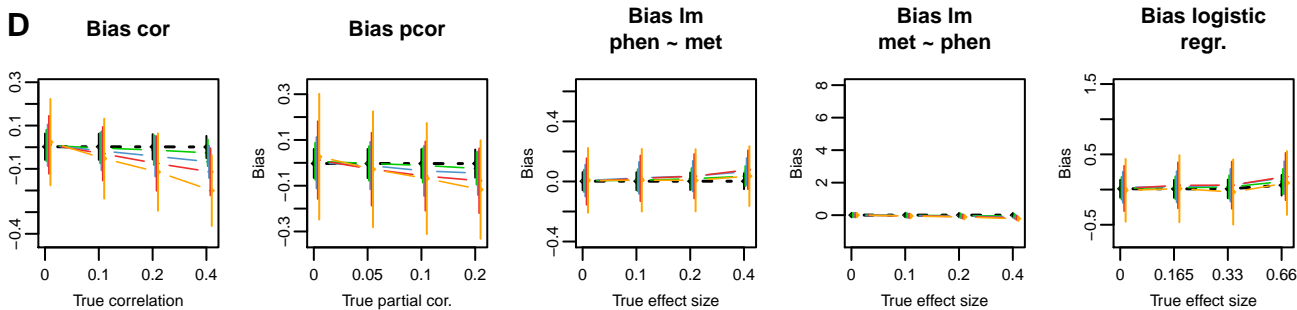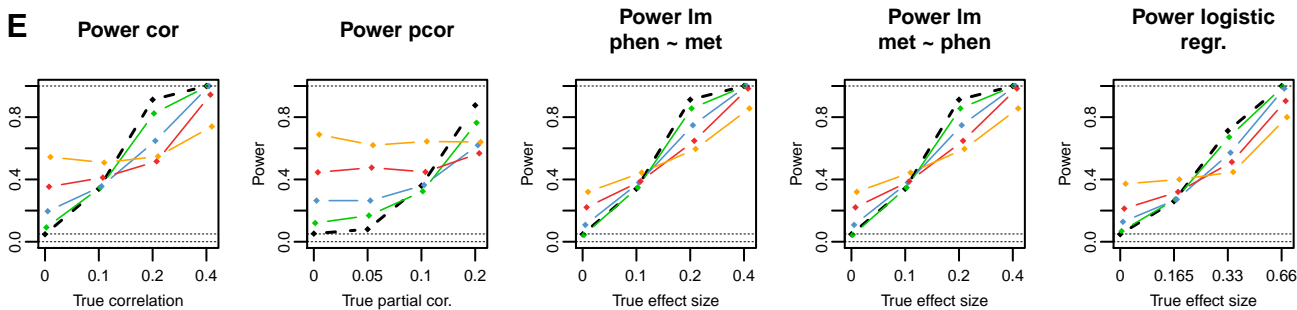

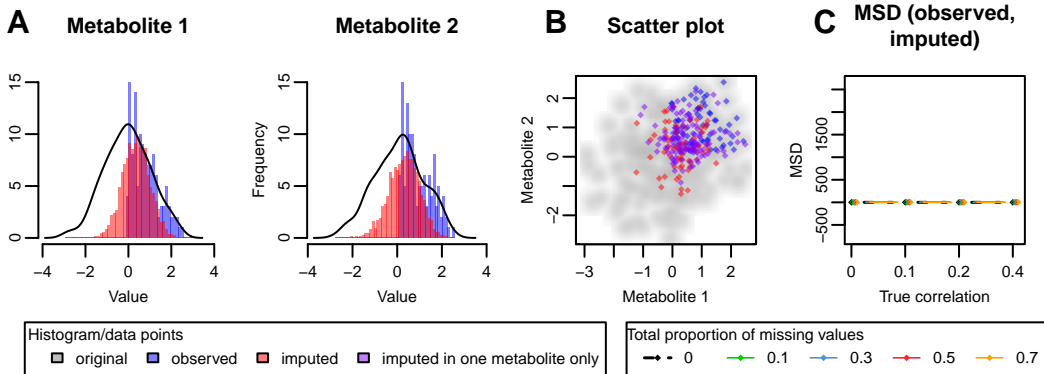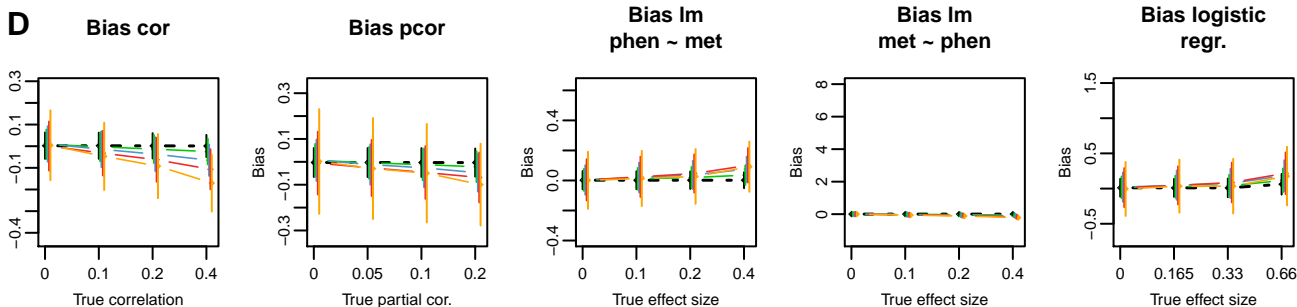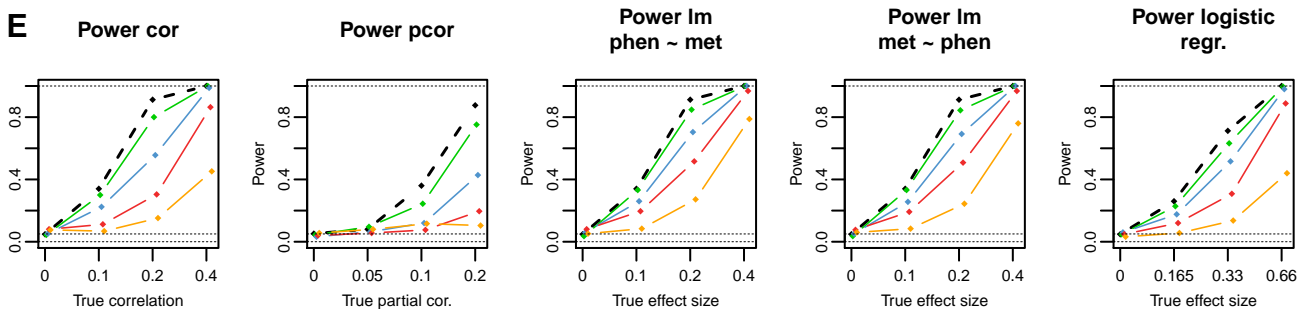



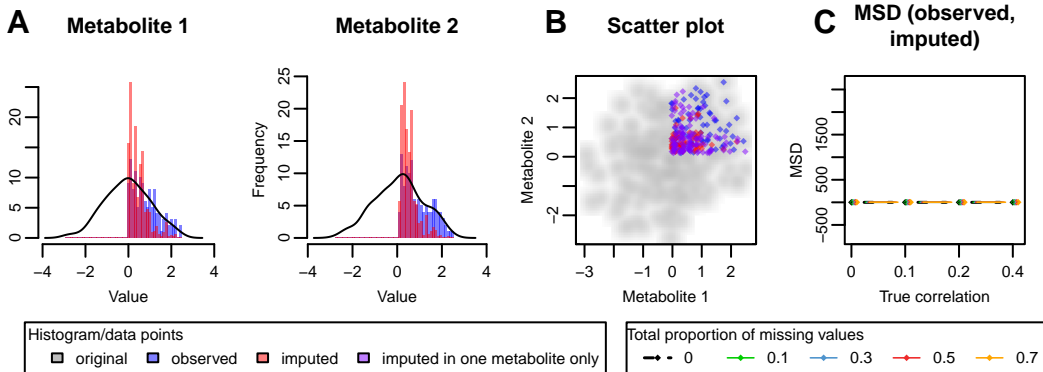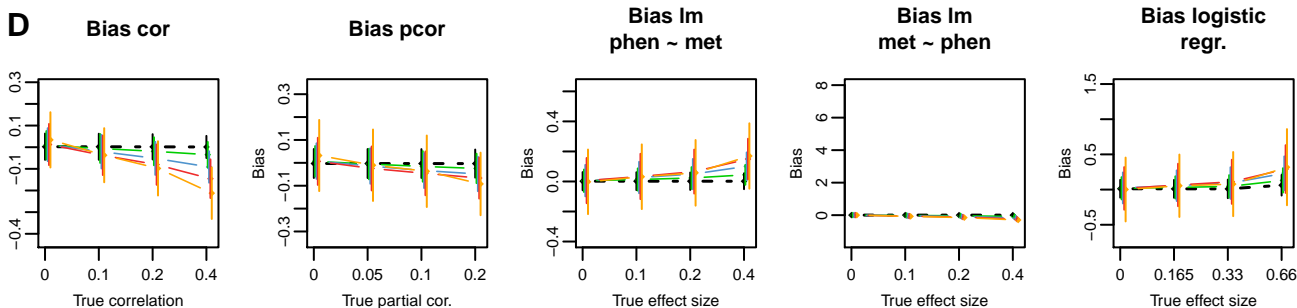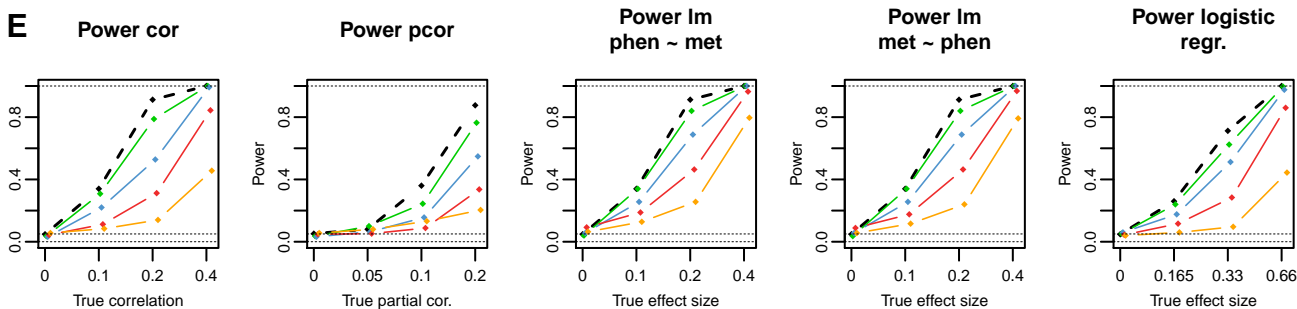

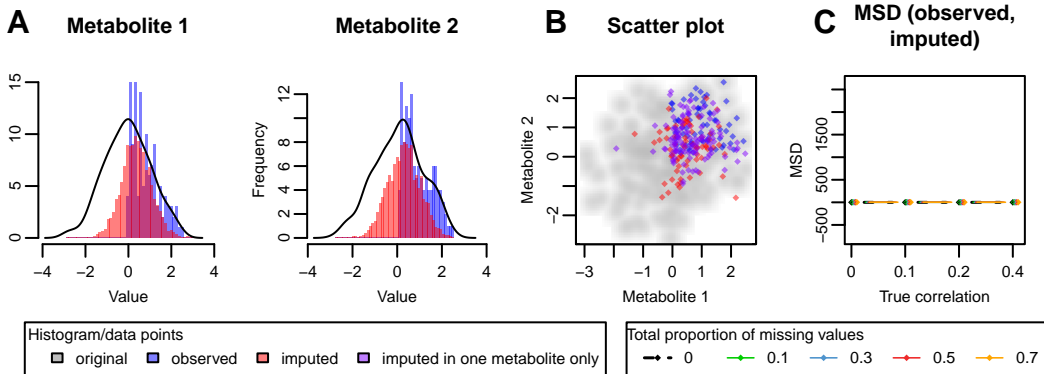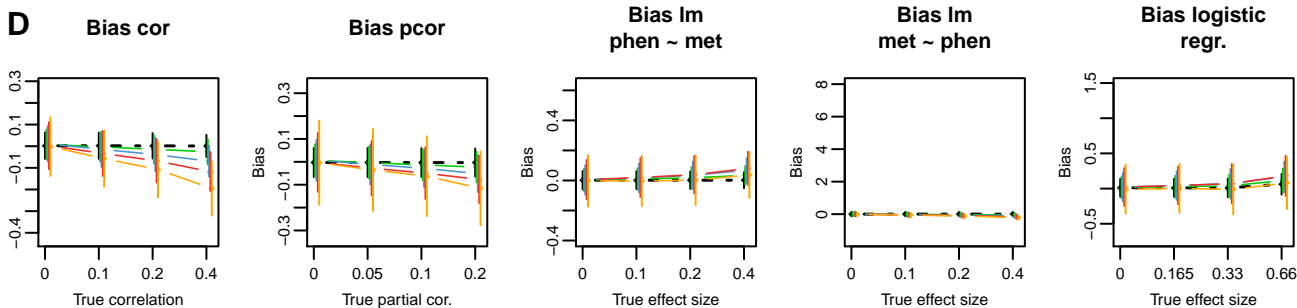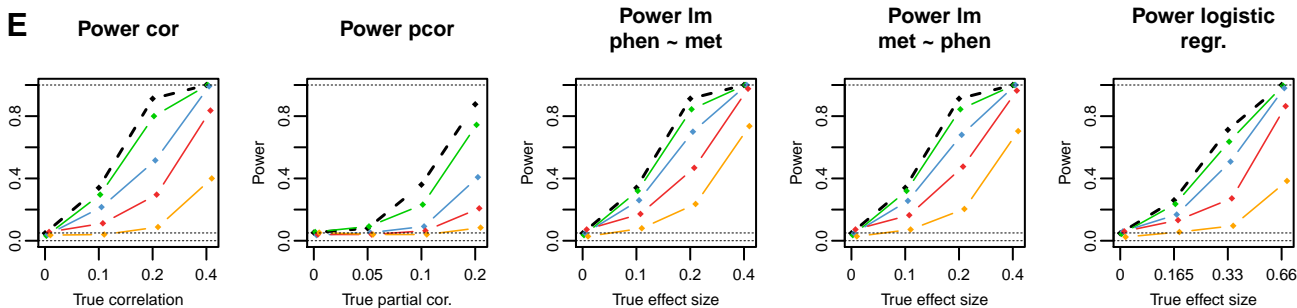

**A** Metabolite 1

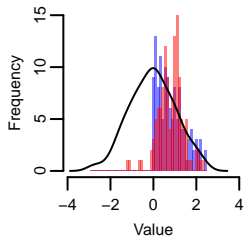

Metabolite 2

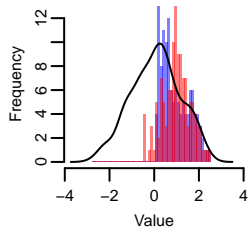

**B** Scatter plot

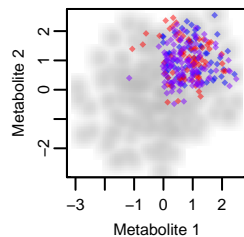

**C** MSD (observed, imputed)

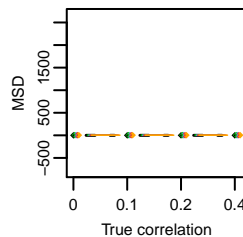

Histogram/data points  
 ■ original ■ observed ■ imputed ■ imputed in one metabolite only

Total proportion of missing values  
 ● - 0 ● 0.1 ● 0.3 ● 0.5 ● 0.7

**D** Bias cor

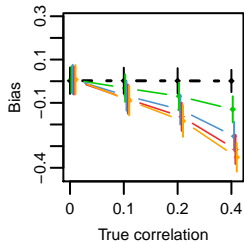

Bias pcor

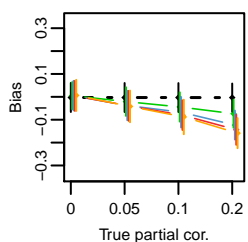

Bias lm phen ~ met

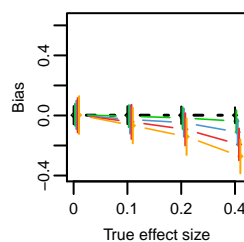

Bias lm met ~ phen

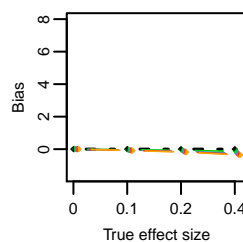

Bias logistic regr.

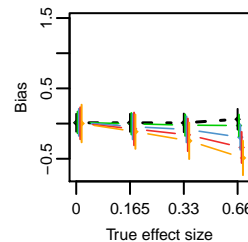

**E** Power cor

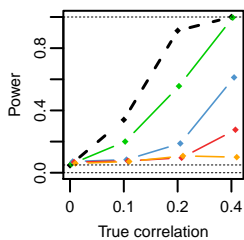

Power pcor

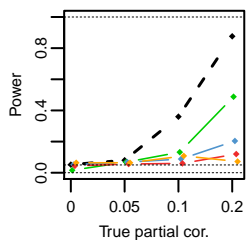

Power lm phen ~ met

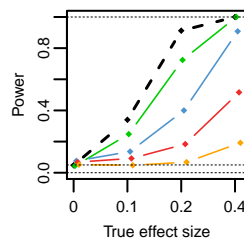

Power lm met ~ phen

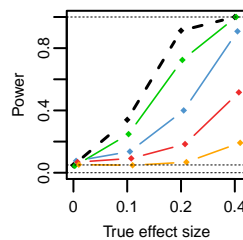

Power logistic regr.

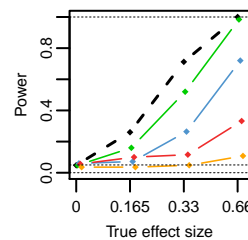

**A** Metabolite 1

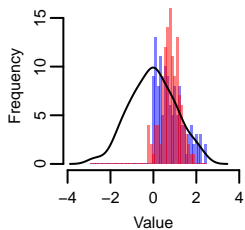

Metabolite 2

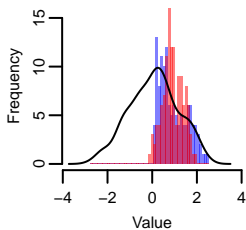

**B** Scatter plot

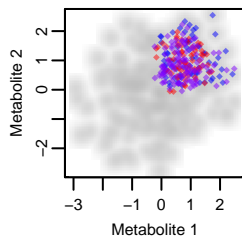

**C** MSD (observed, imputed)

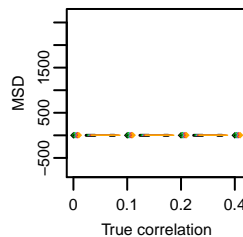

Histogram/data points  
 ■ original ■ observed ■ imputed ■ imputed in one metabolite only

Total proportion of missing values  
 ● 0 ● 0.1 ● 0.3 ● 0.5 ● 0.7

**D** Bias cor

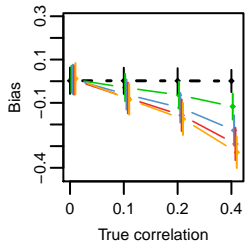

Bias pcor

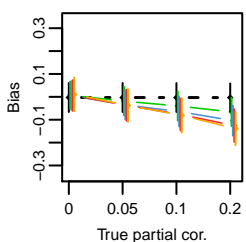

Bias lm phen ~ met

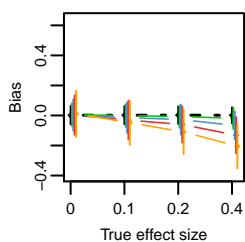

Bias lm met ~ phen

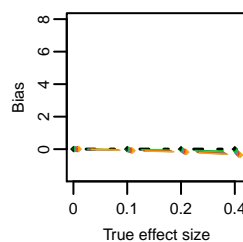

Bias logistic regr.

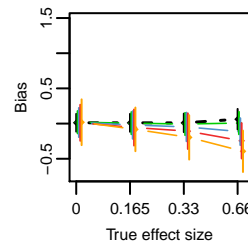

**E** Power cor

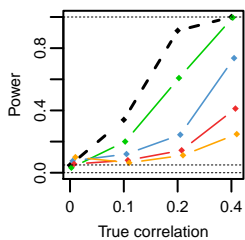

Power pcor

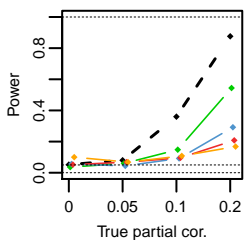

Power lm phen ~ met

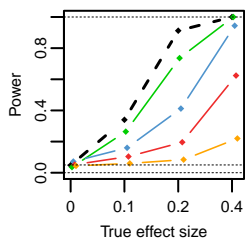

Power lm met ~ phen

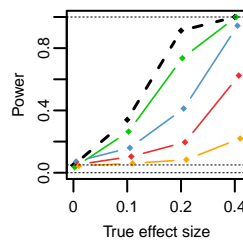

Power logistic regr.

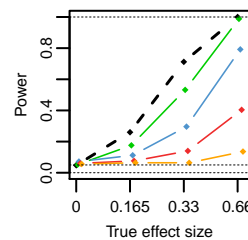

**A** Metabolite 1

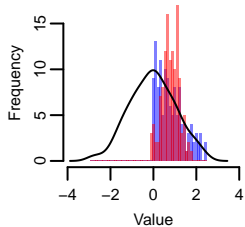

Metabolite 2

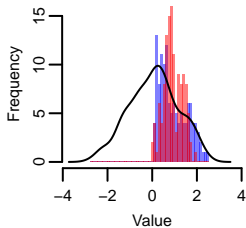

**B** Scatter plot

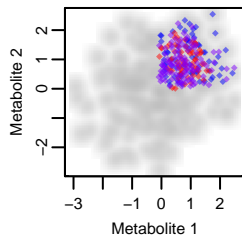

**C** MSD (observed, imputed)

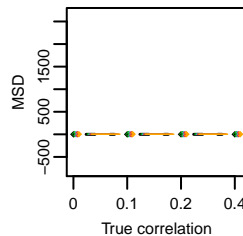

Histogram/data points  
 ■ original ■ observed ■ imputed ■ imputed in one metabolite only

Total proportion of missing values  
 ● 0 ● 0.1 ● 0.3 ● 0.5 ● 0.7

**D** Bias cor

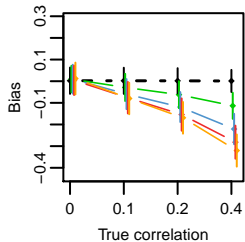

Bias pcor

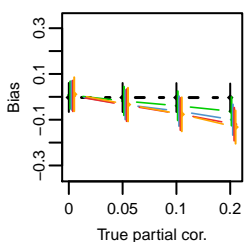

Bias lm phen ~ met

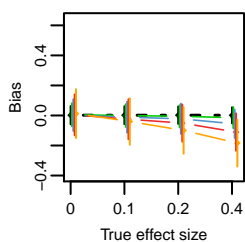

Bias lm met ~ phen

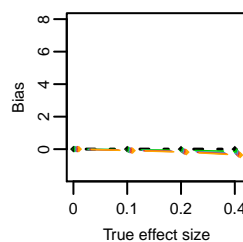

Bias logistic regr.

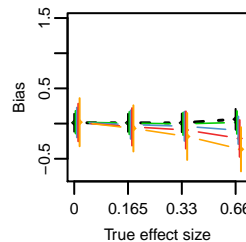

**E** Power cor

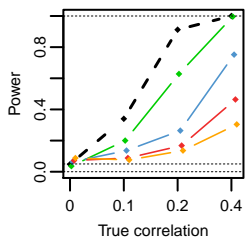

Power pcor

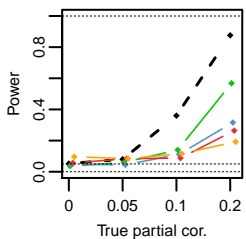

Power lm phen ~ met

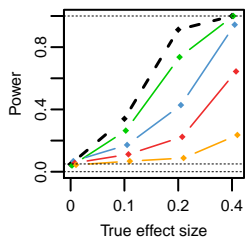

Power lm met ~ phen

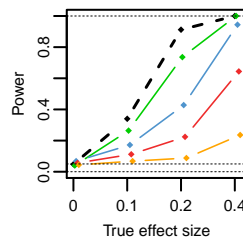

Power logistic regr.

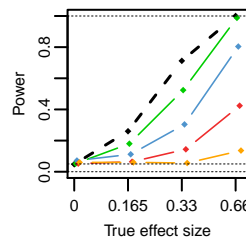

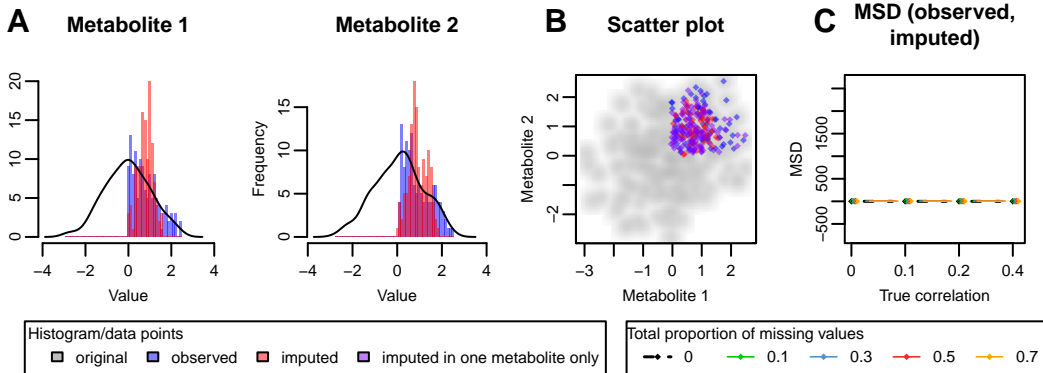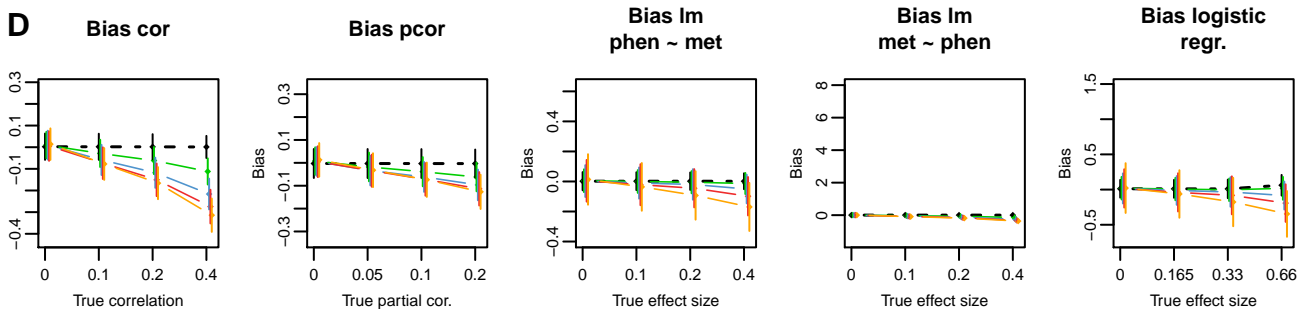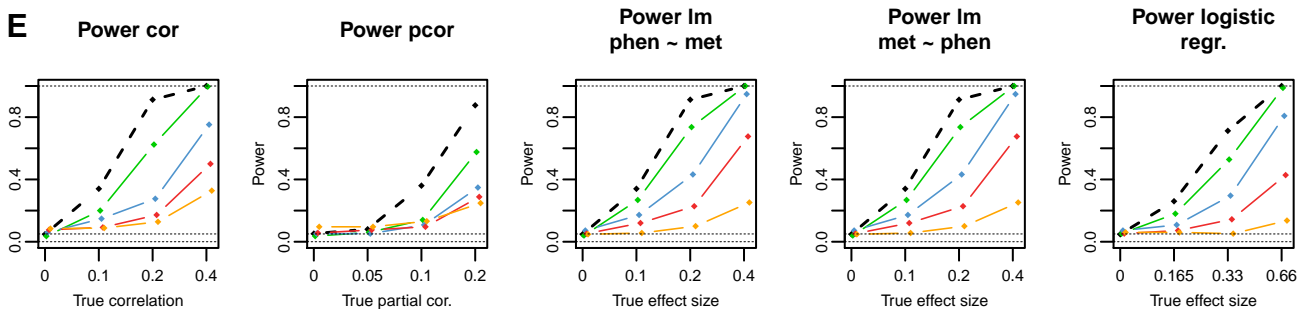

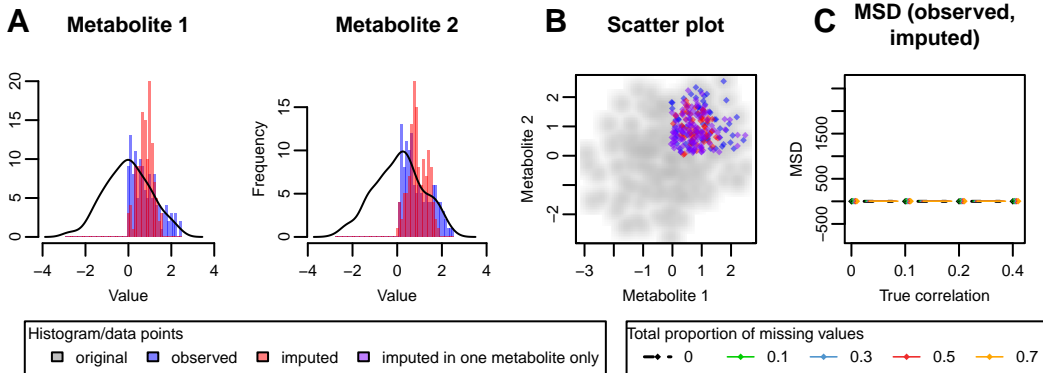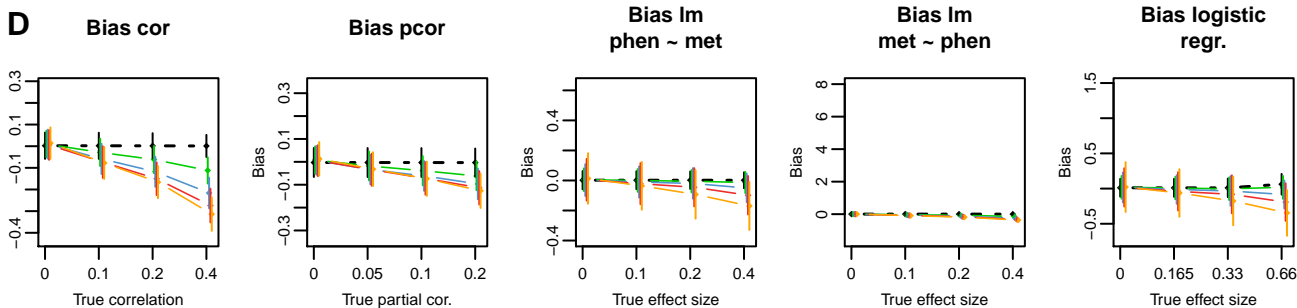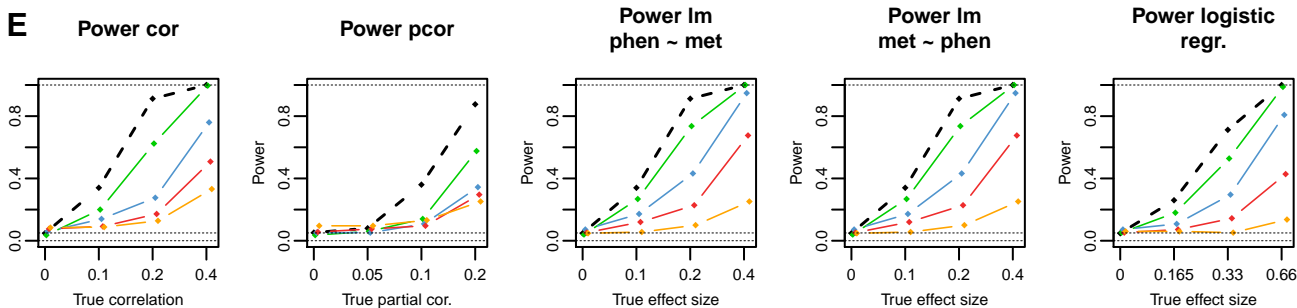

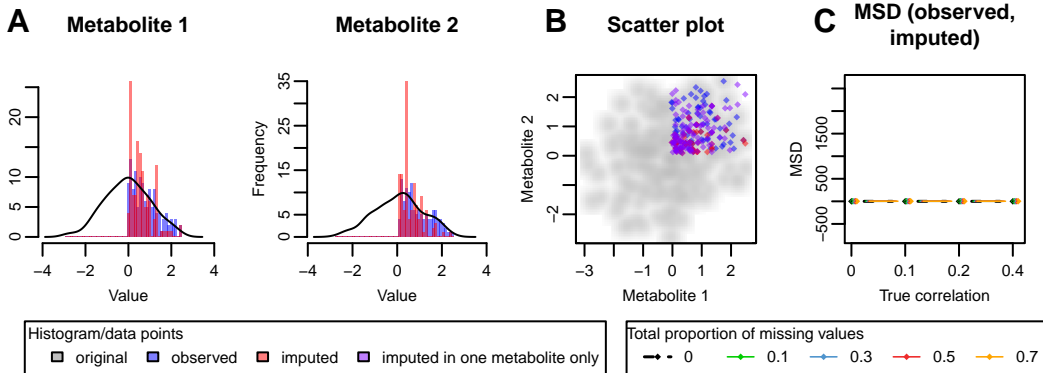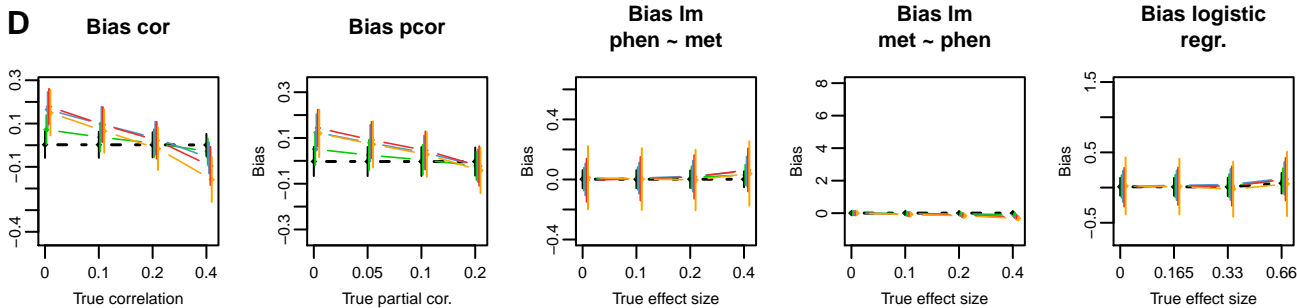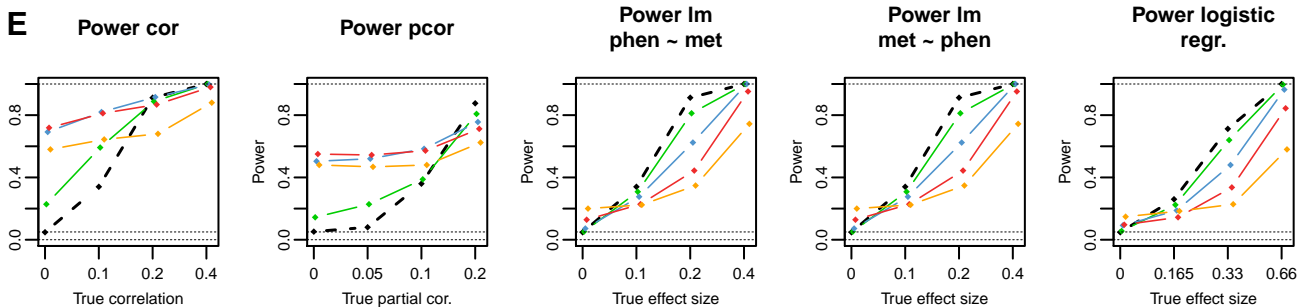



**A** Metabolite 1

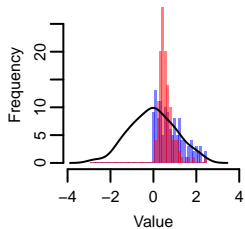

Metabolite 2

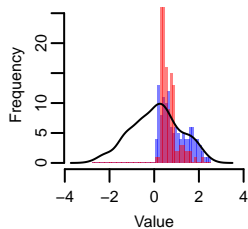

**B** Scatter plot

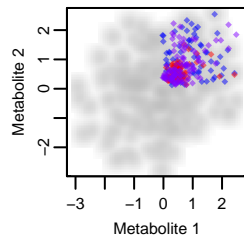

**C** MSD (observed, imputed)

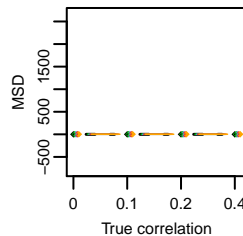

Histogram/data points  
 ■ original ■ observed ■ imputed ■ imputed in one metabolite only

Total proportion of missing values  
 ● - 0 ● 0.1 ● 0.3 ● 0.5 ● 0.7

**D** Bias cor

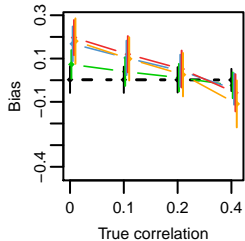

Bias pcor

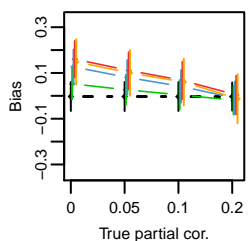

Bias lm phen ~ met

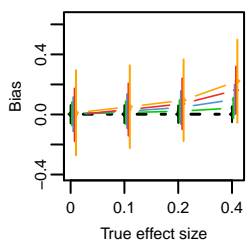

Bias lm met ~ phen

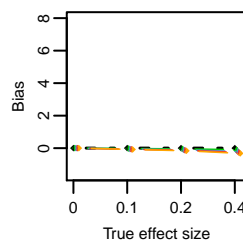

Bias logistic regr.

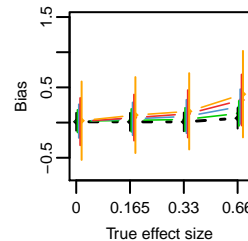

**E** Power cor

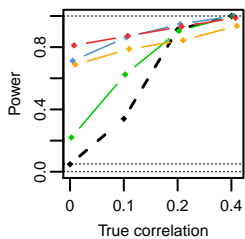

Power pcor

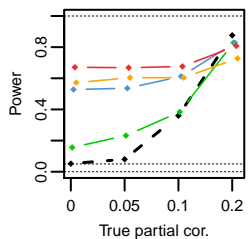

Power lm phen ~ met

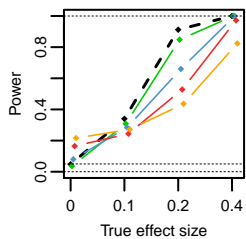

Power lm met ~ phen

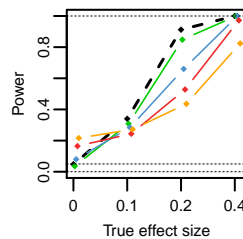

Power logistic regr.

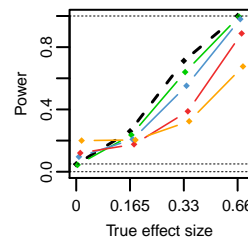

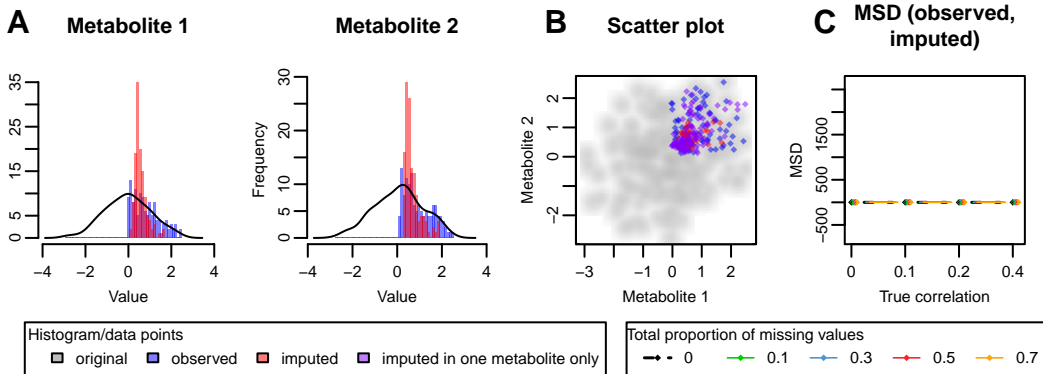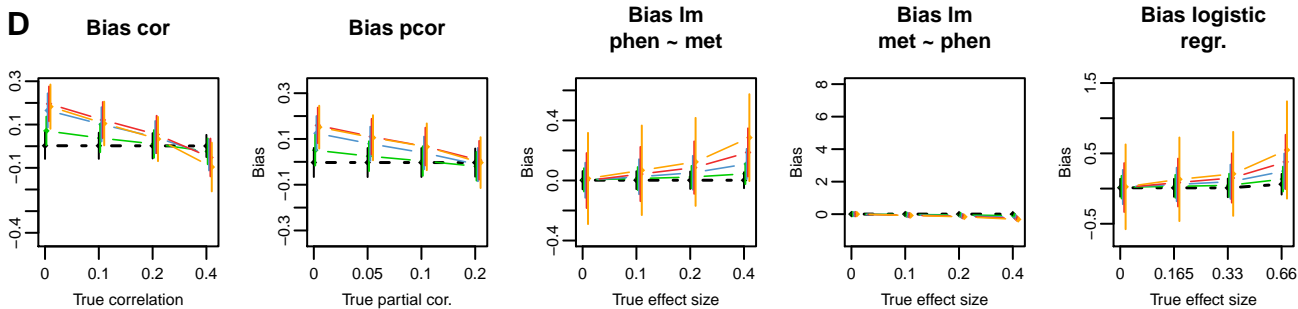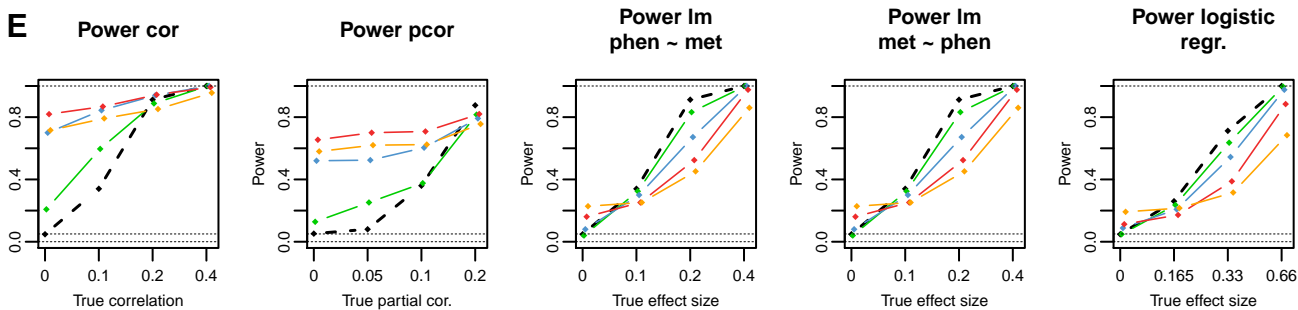

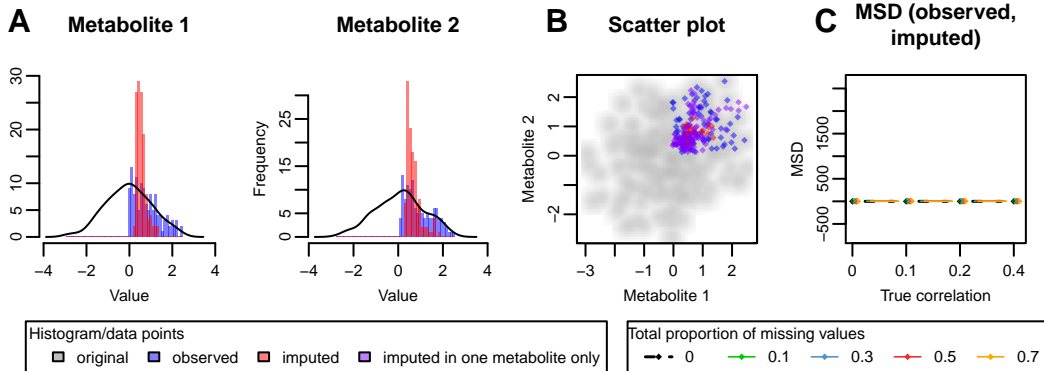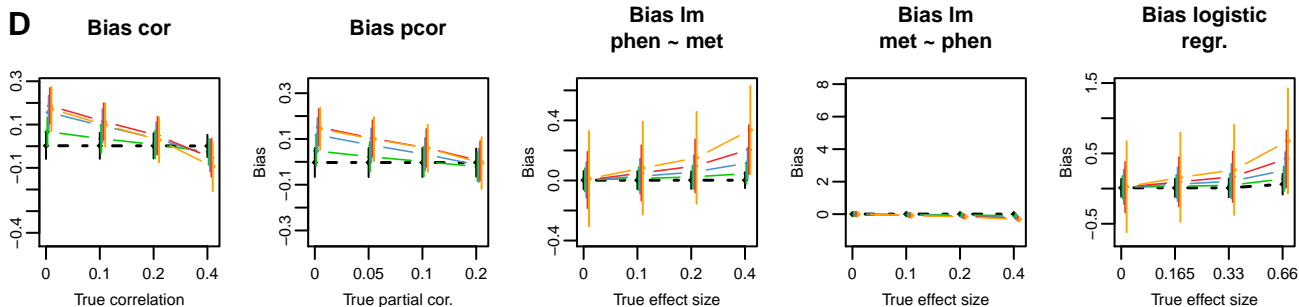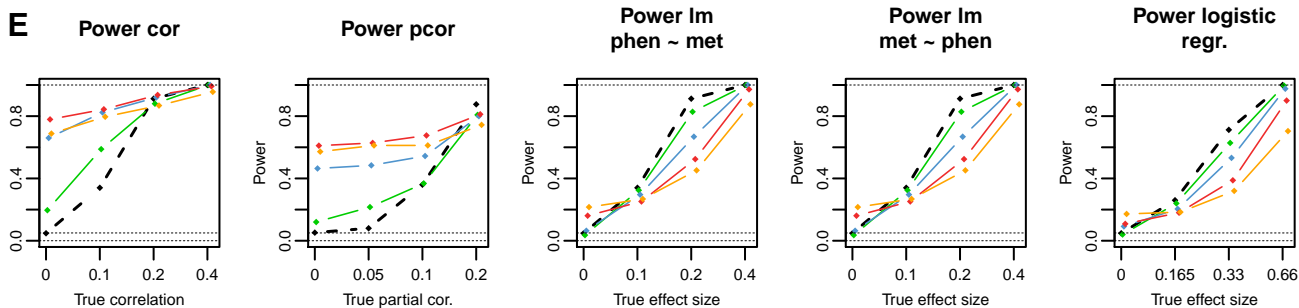

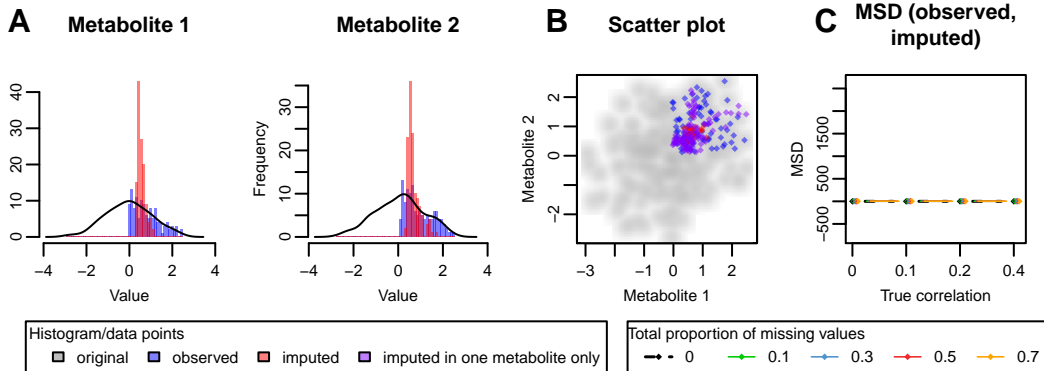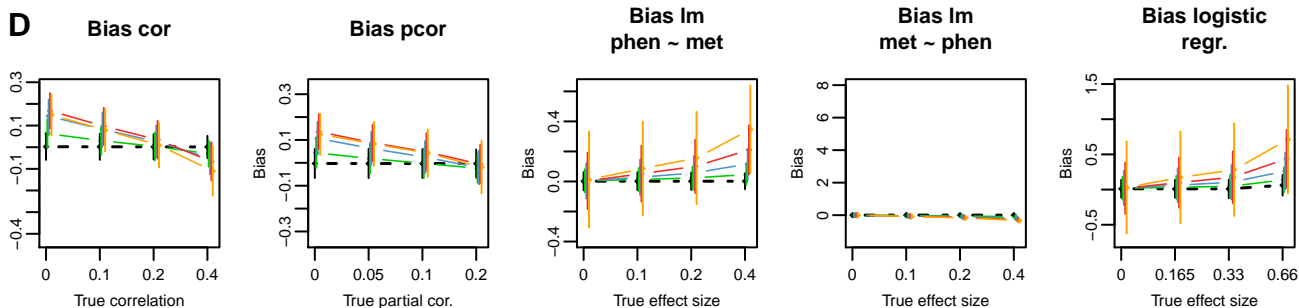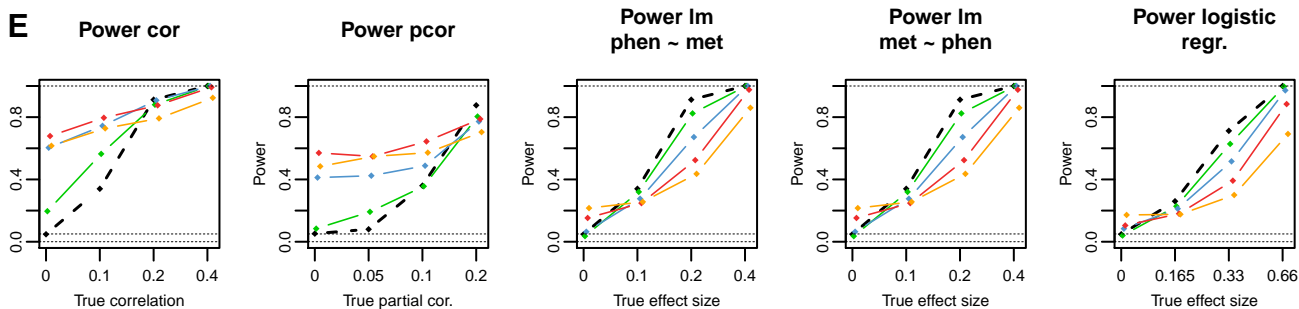

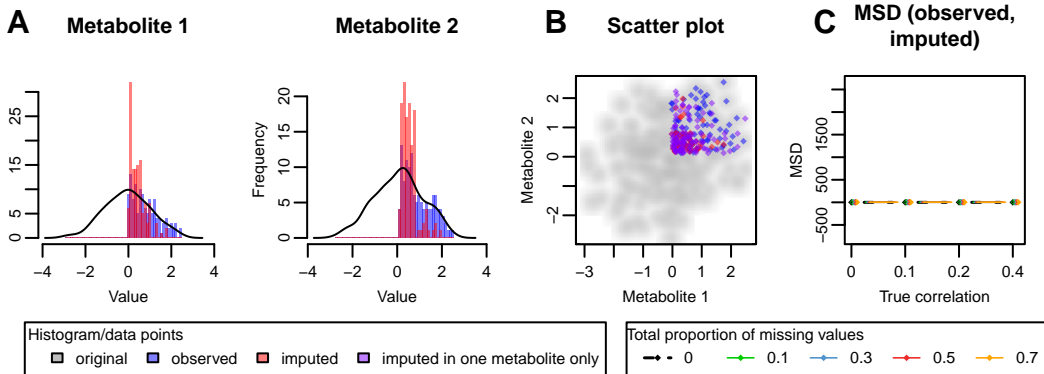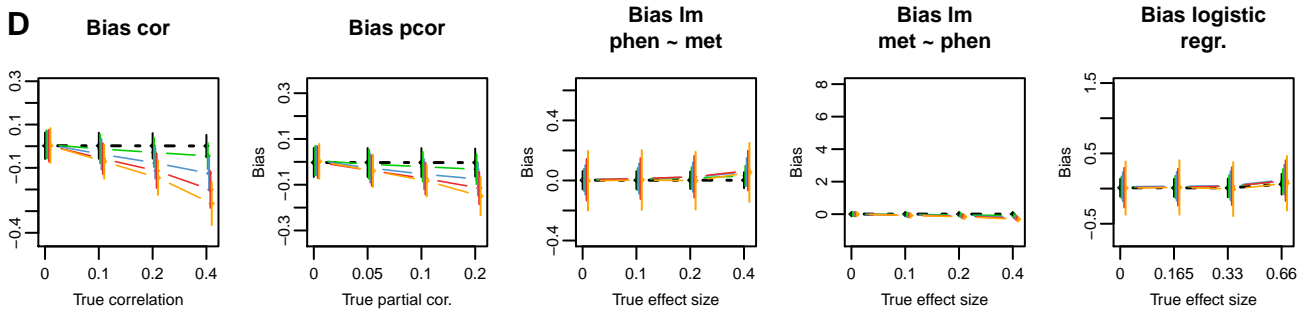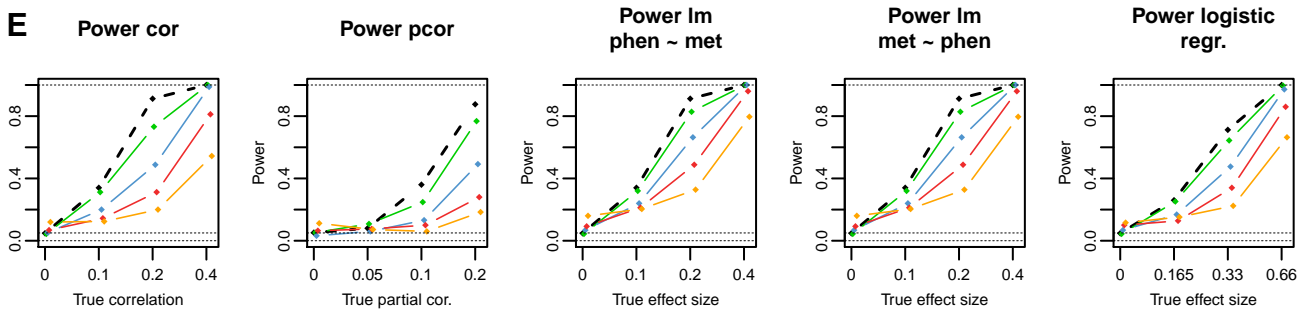

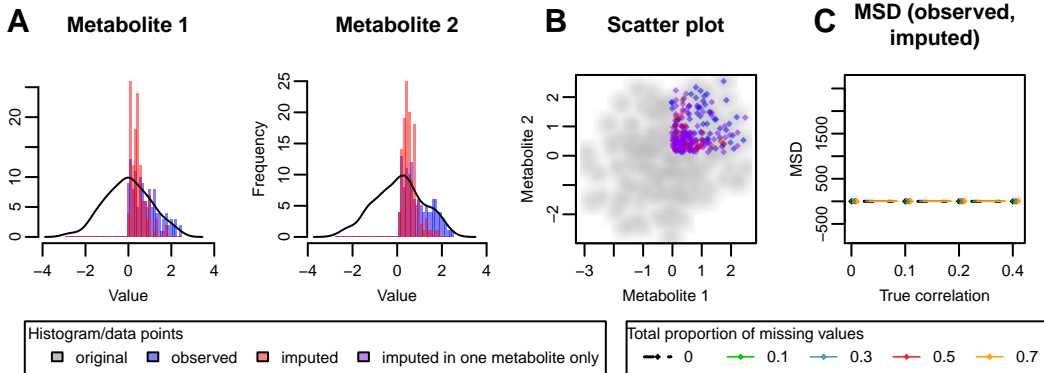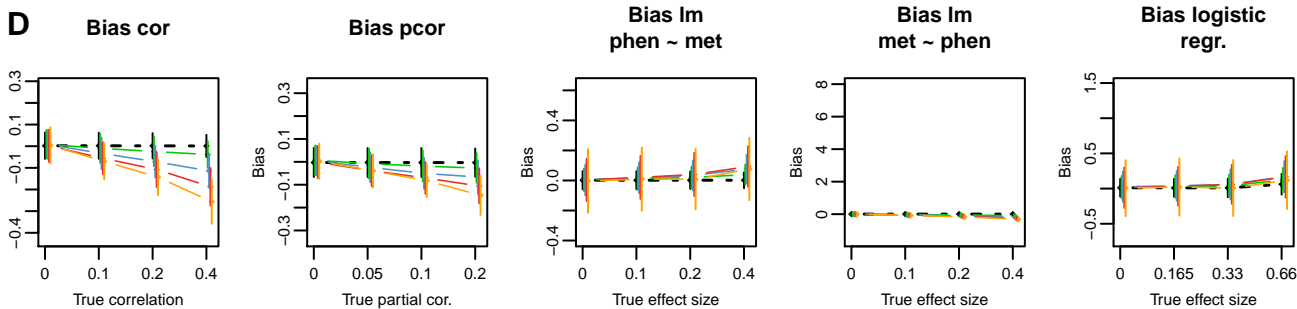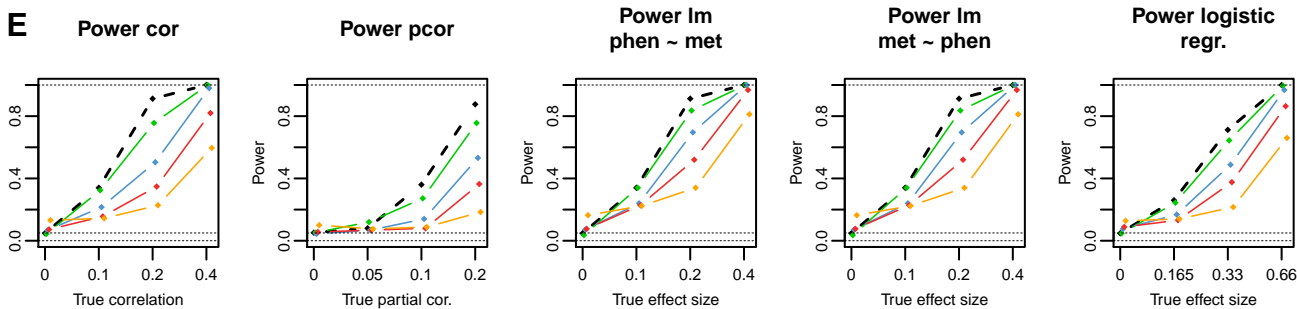

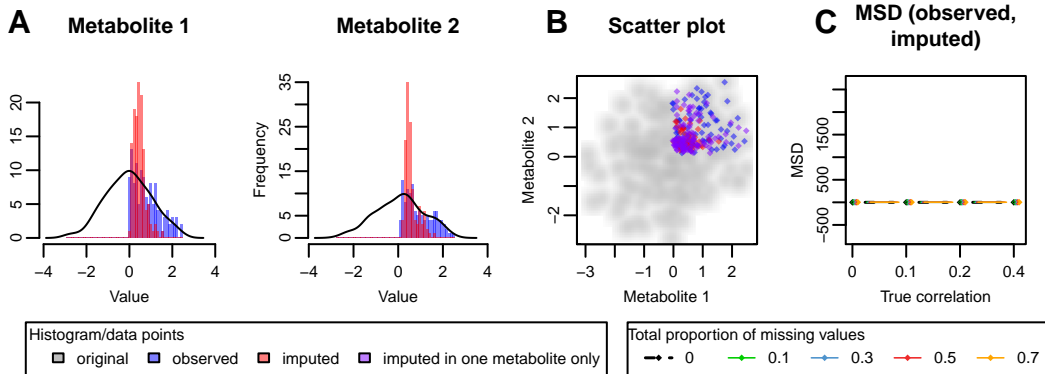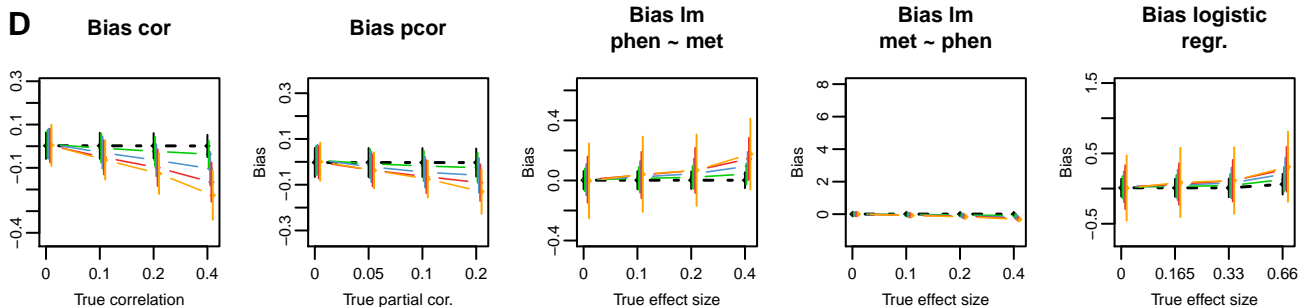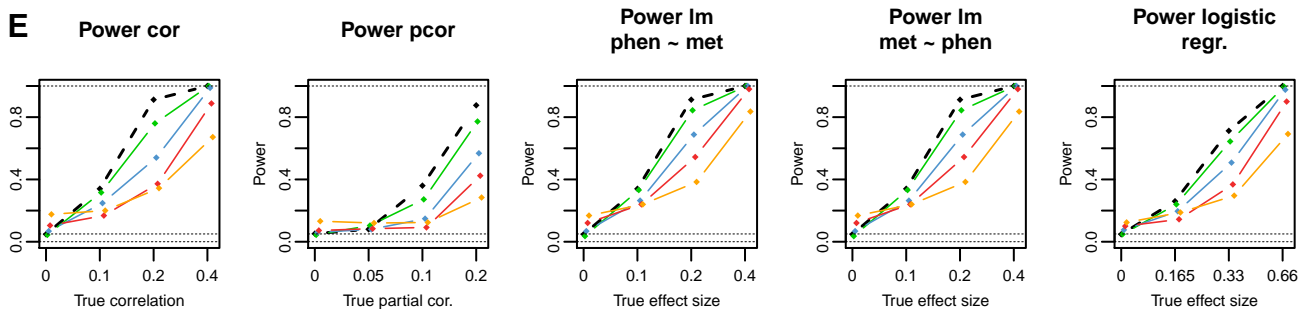

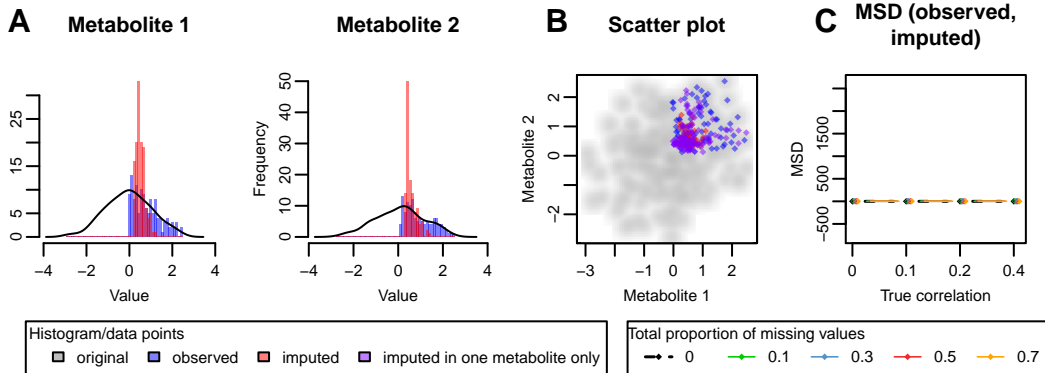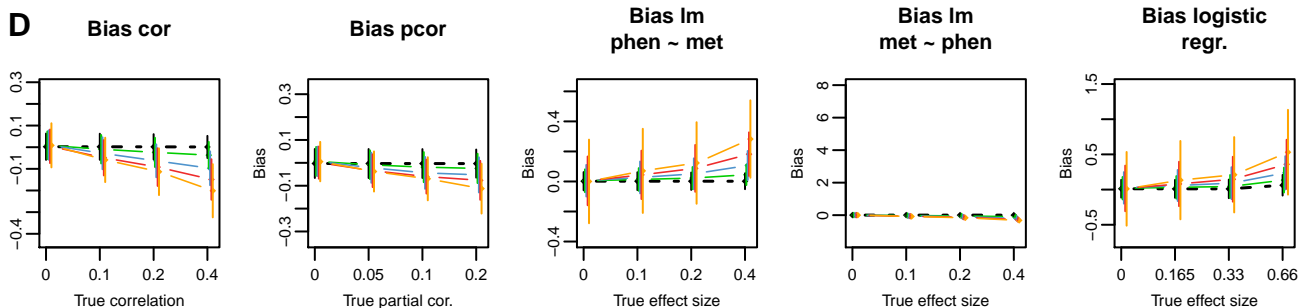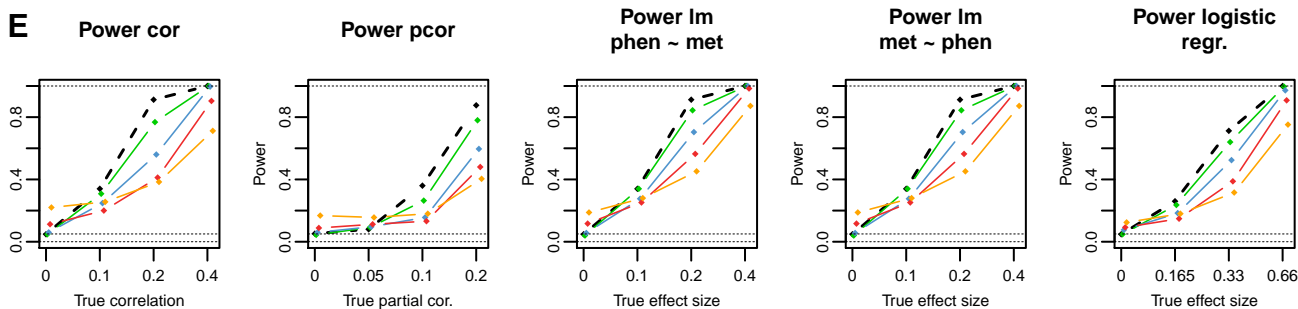



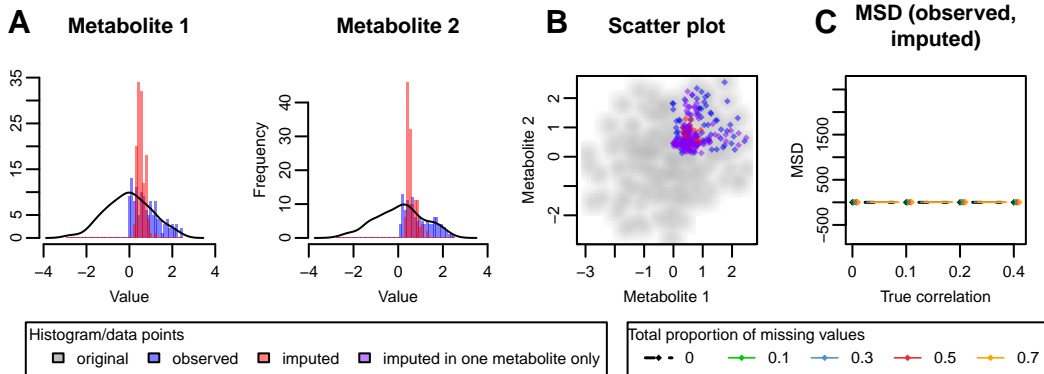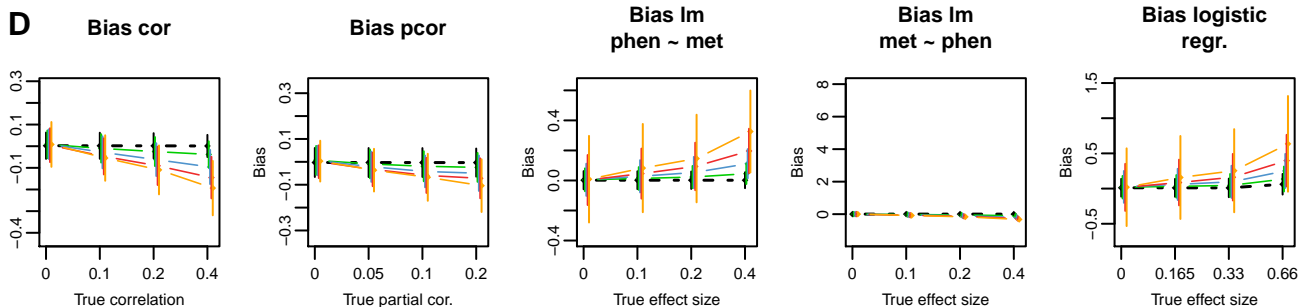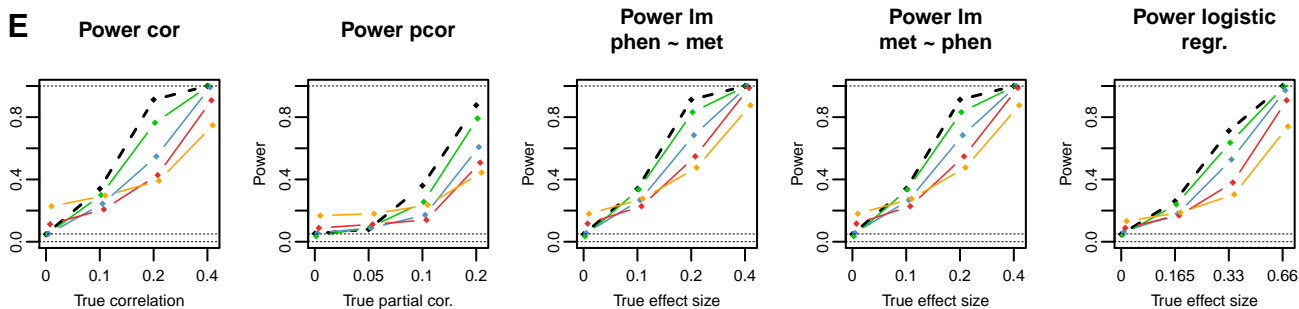

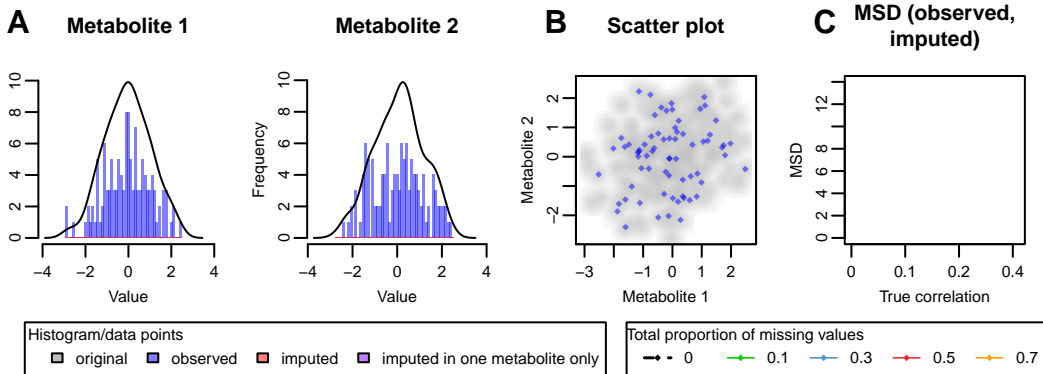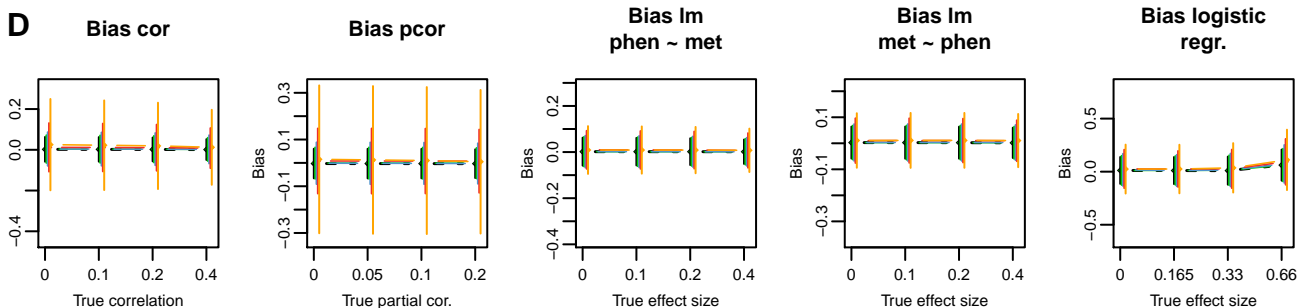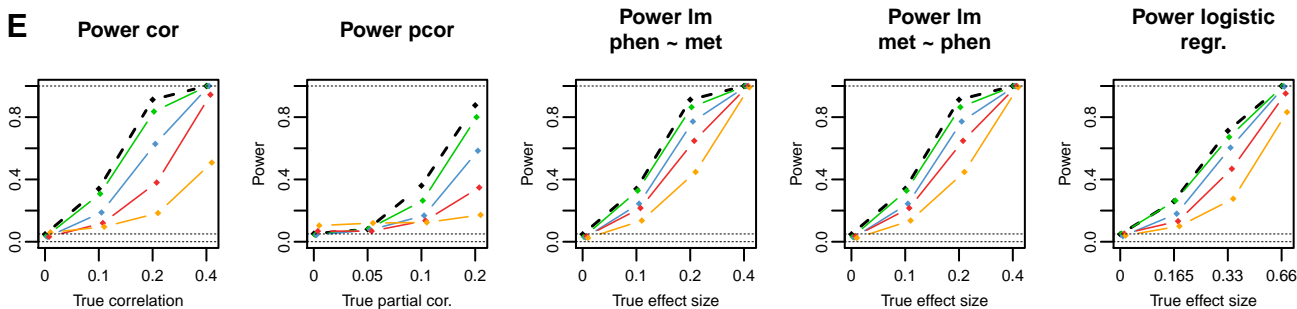

**A** Metabolite 1

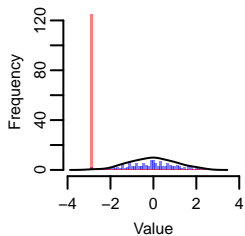

Metabolite 2

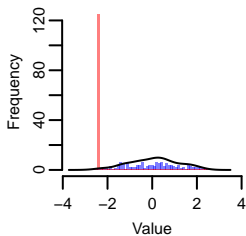

**B** Scatter plot

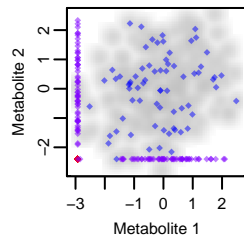

**C** MSD (observed, imputed)

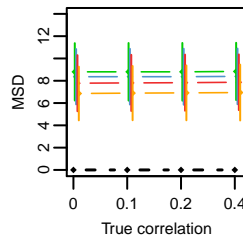

Histogram/data points

original observed imputed imputed in one metabolite only

Total proportion of missing values

0 0.1 0.3 0.5 0.7

**D** Bias cor

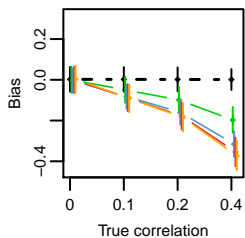

Bias pcor

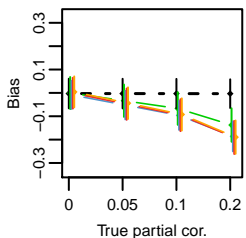

Bias lm phen ~ met

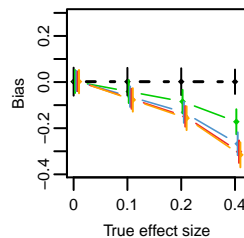

Bias lm met ~ phen

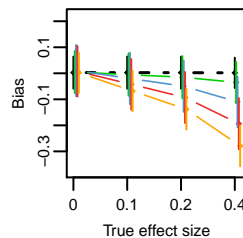

Bias logistic regr.

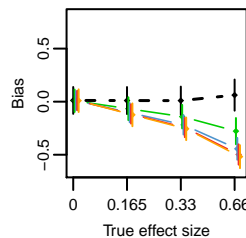

**E** Power cor

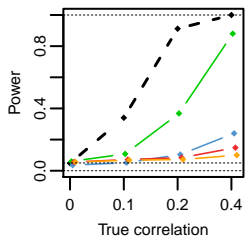

Power pcor

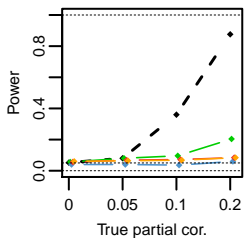

Power lm phen ~ met

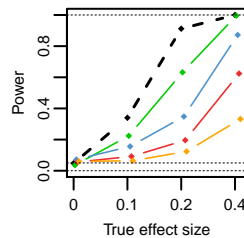

Power lm met ~ phen

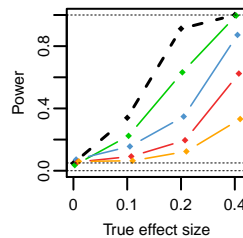

Power logistic regr.

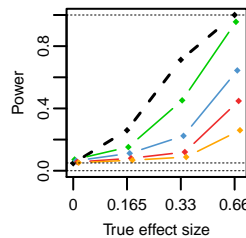

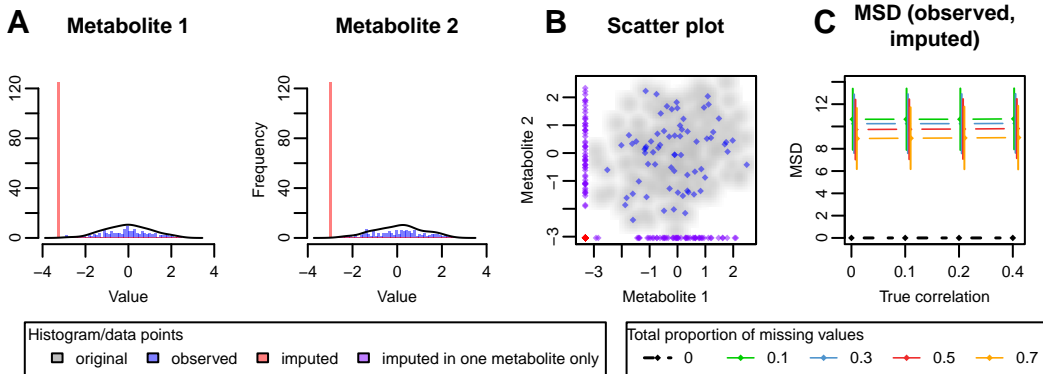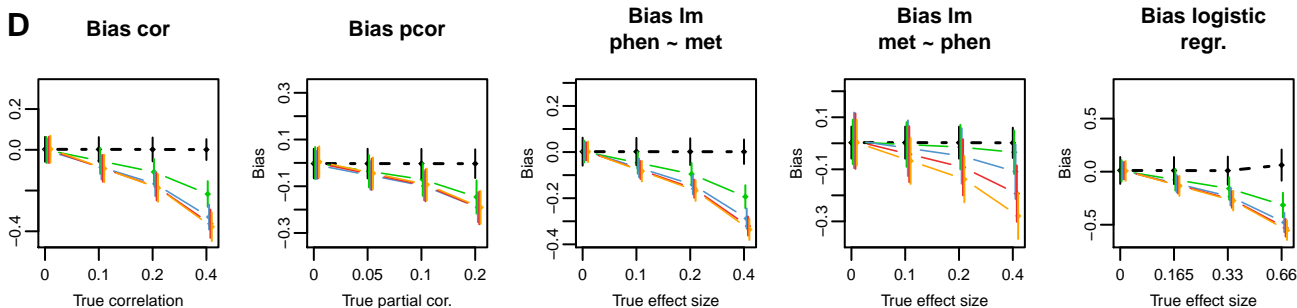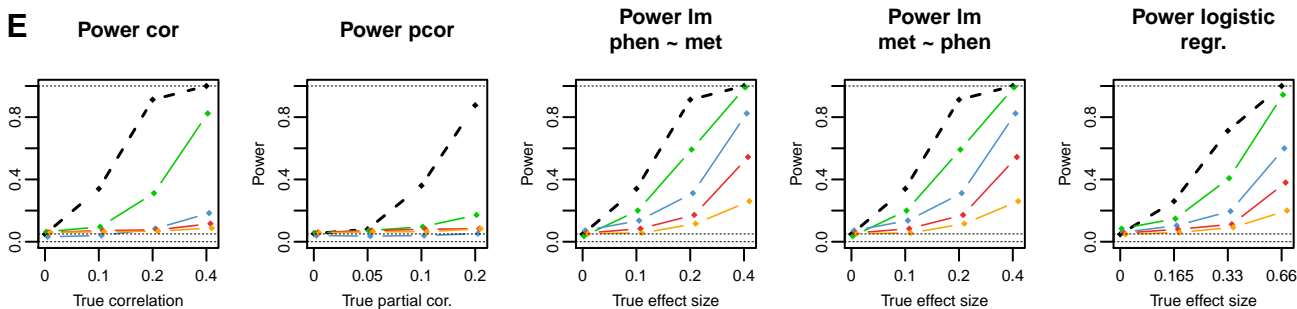

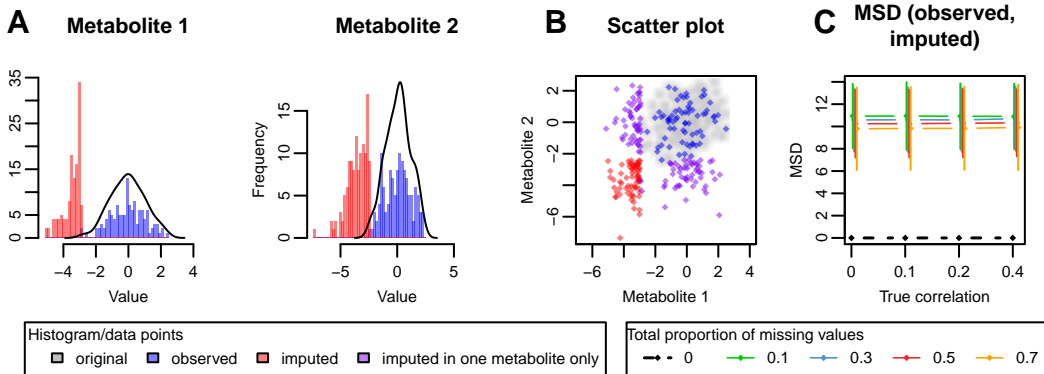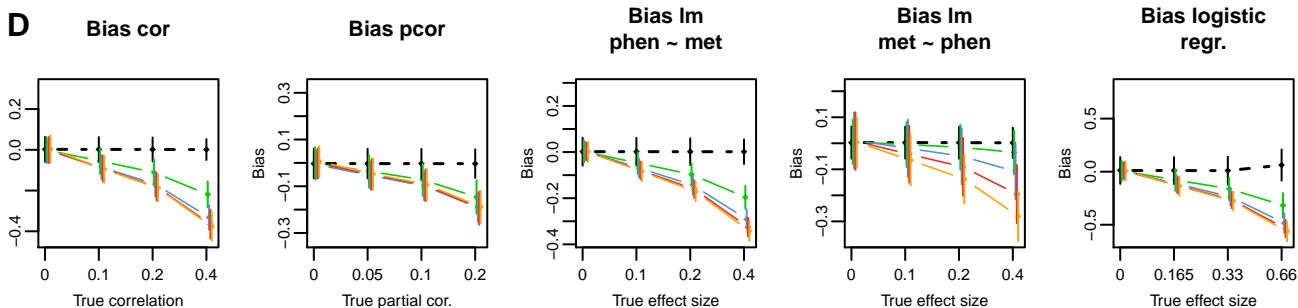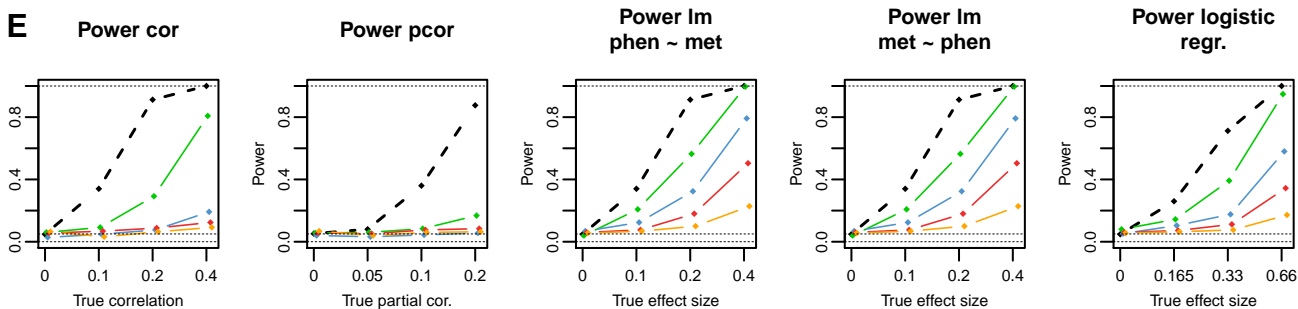

**A** Metabolite 1

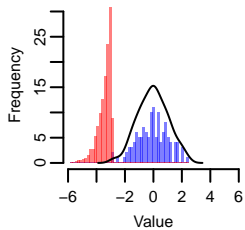

Metabolite 2

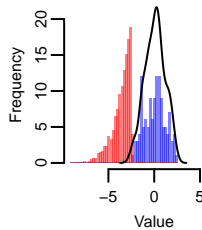

**B** Scatter plot

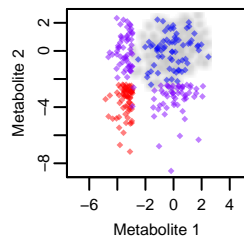

**C** MSD (observed, imputed)

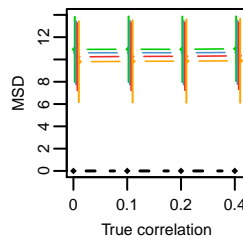

Histogram/data points  
 ■ original ■ observed ■ imputed ■ imputed in one metabolite only

Total proportion of missing values  
 - - 0 — 0.1 — 0.3 — 0.5 — 0.7

**D** Bias cor

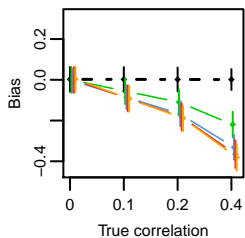

Bias pcor

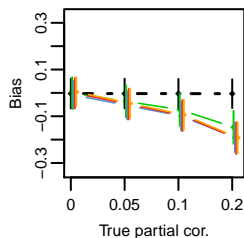

Bias Im phen ~ met

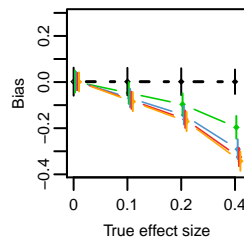

Bias Im met ~ phen

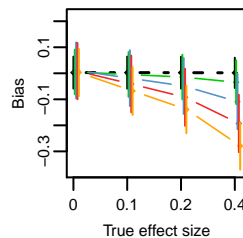

Bias logistic regr.

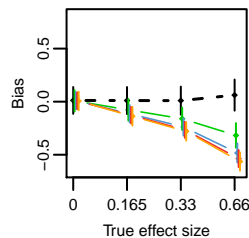

**E** Power cor

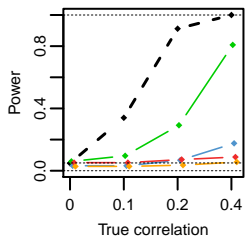

Power pcor

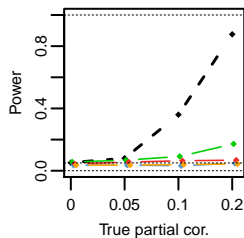

Power Im phen ~ met

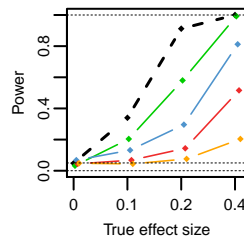

Power Im met ~ phen

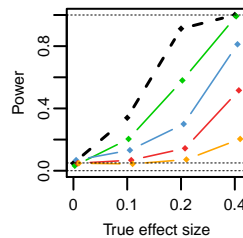

Power logistic regr.

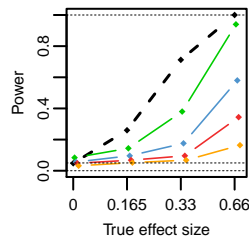

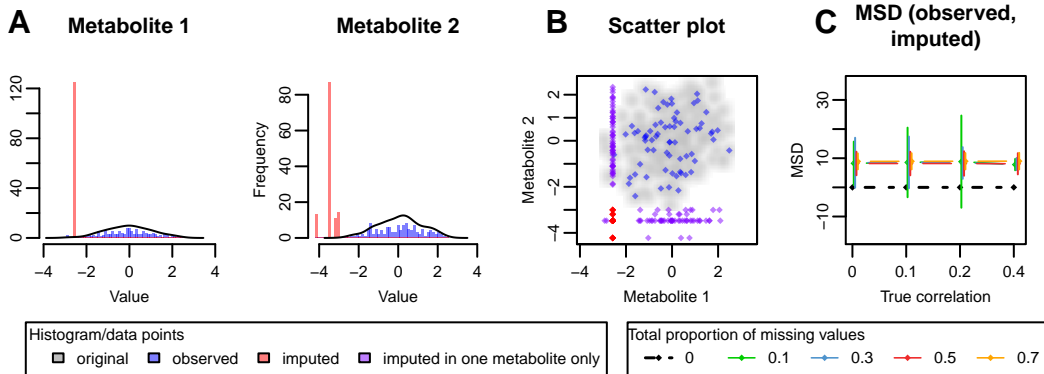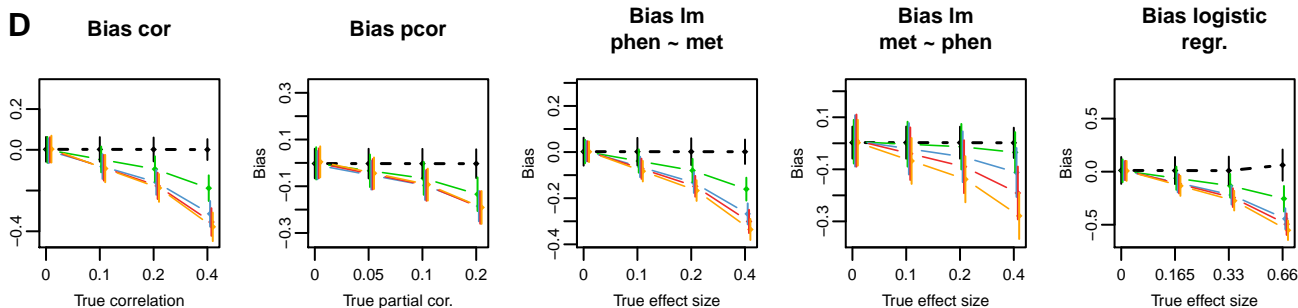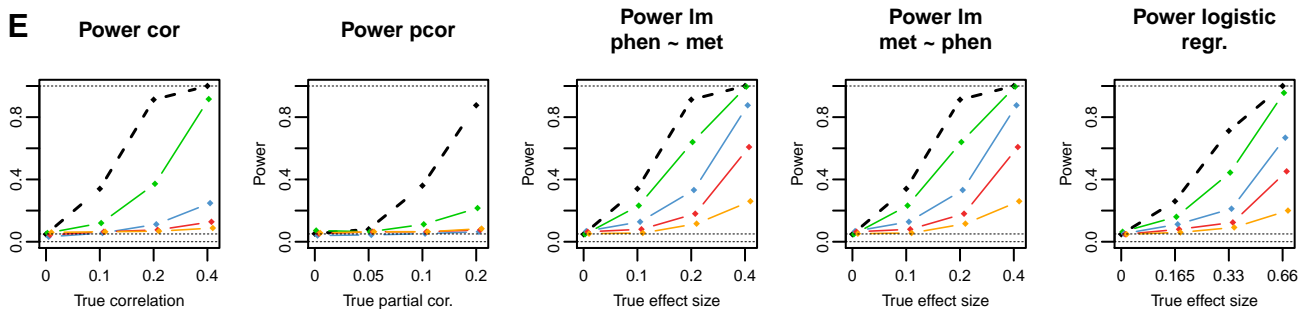

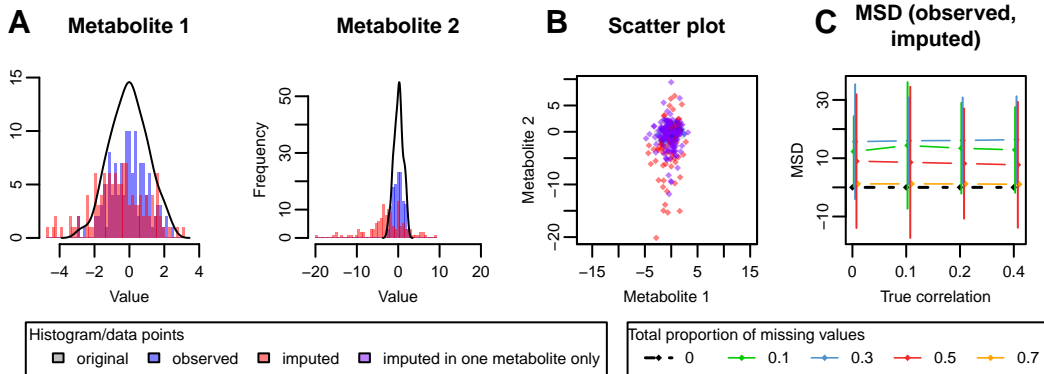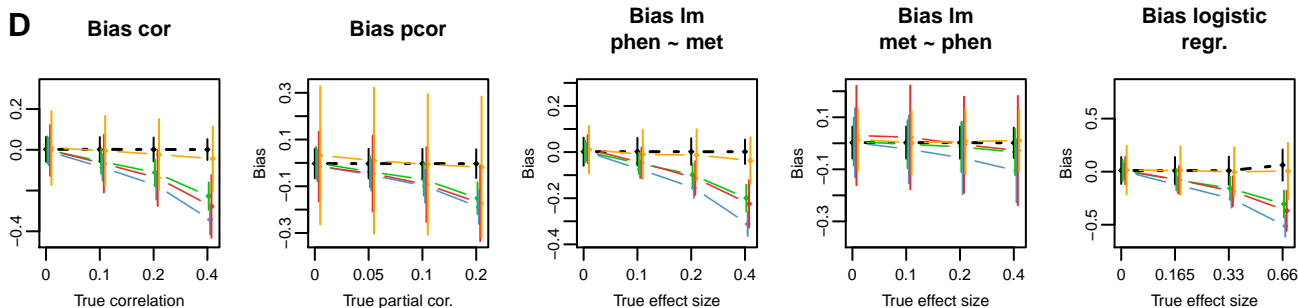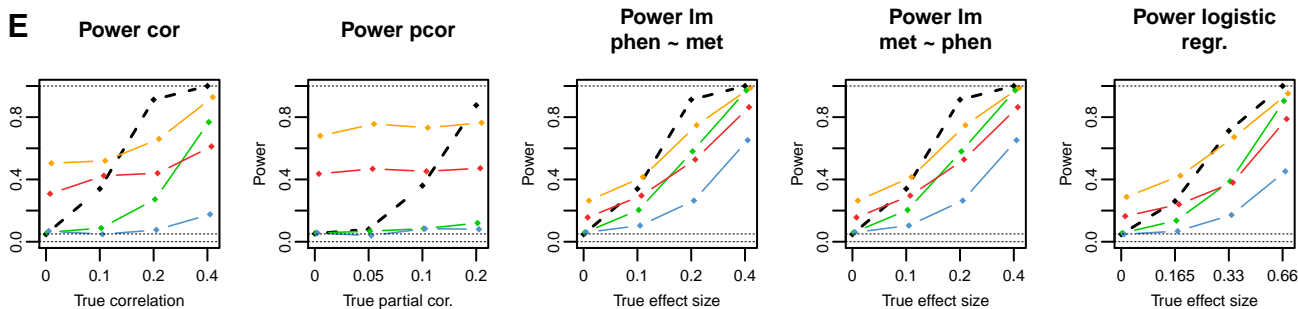



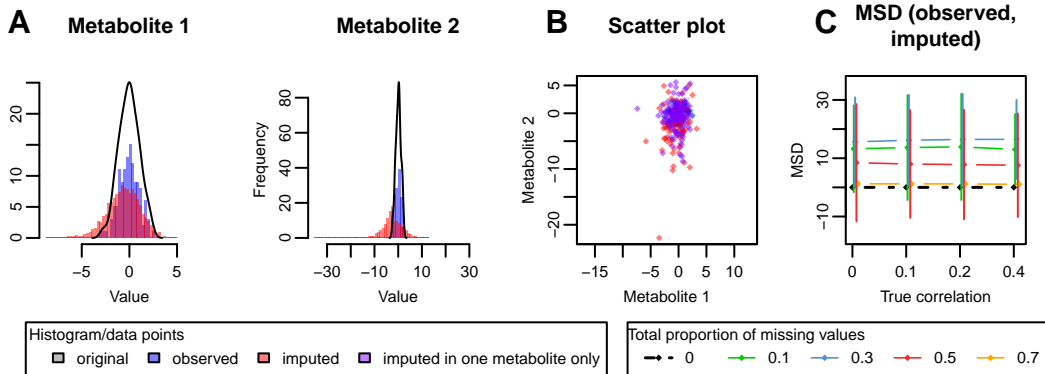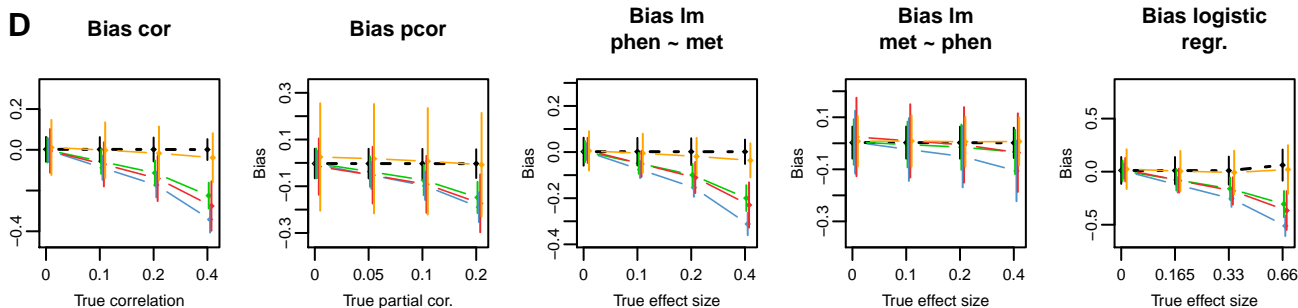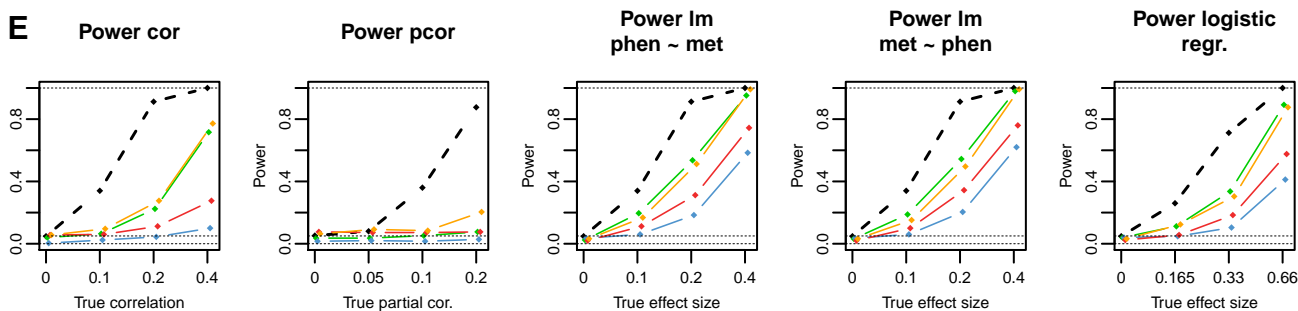

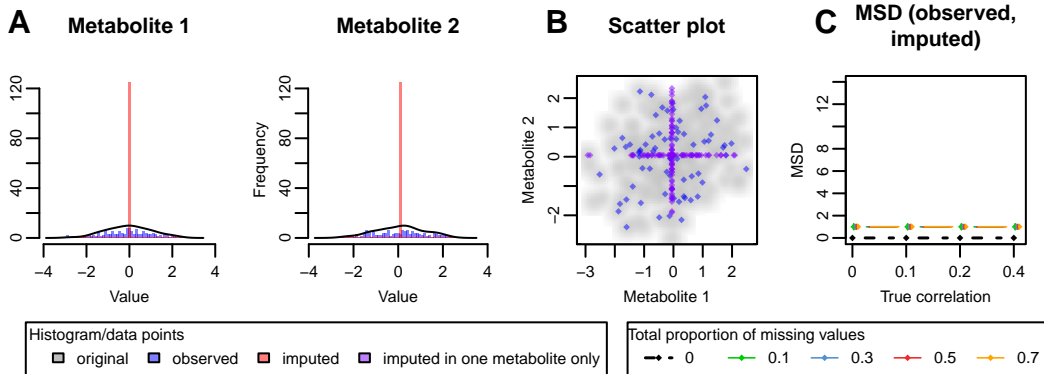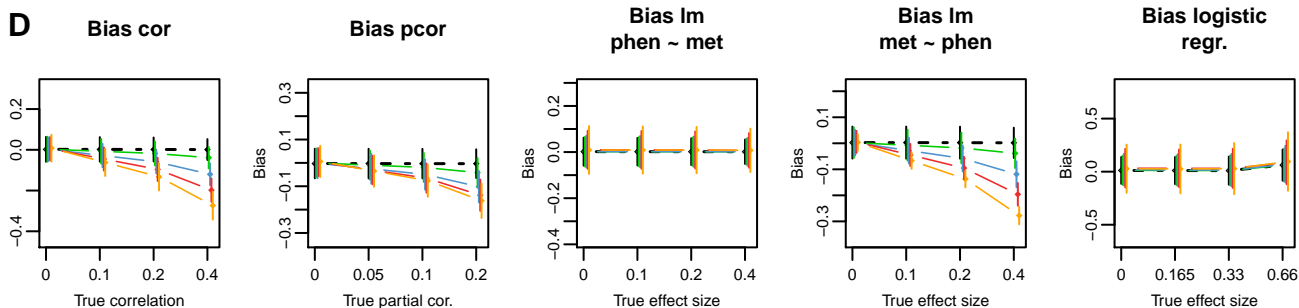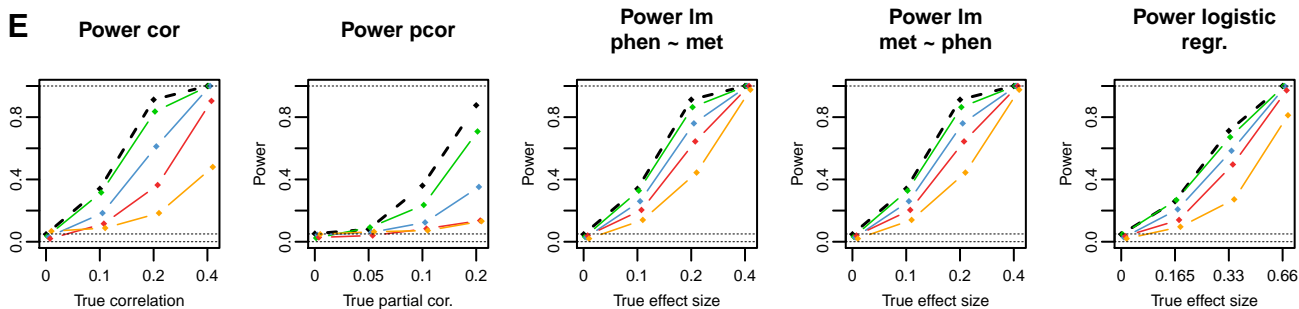

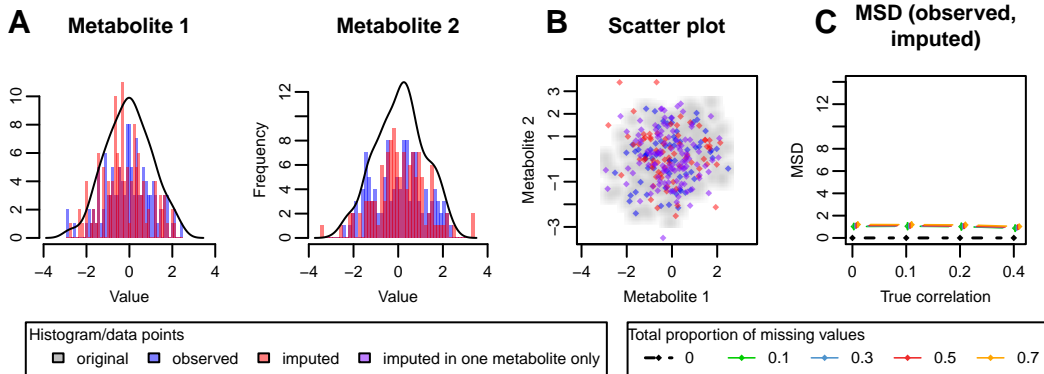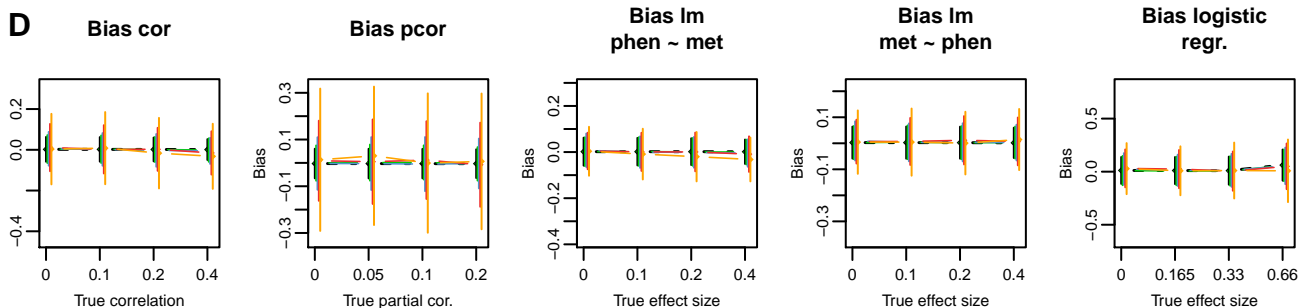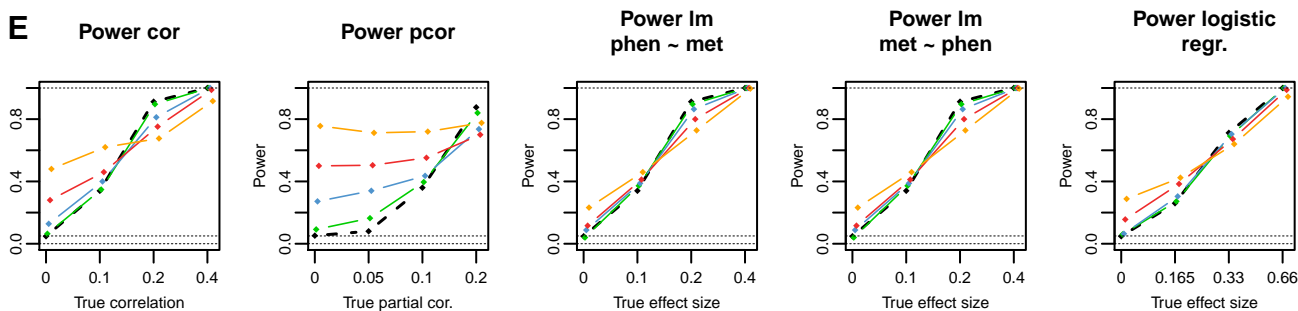

**A** Metabolite 1

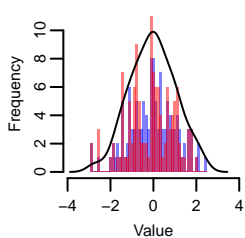

Metabolite 2

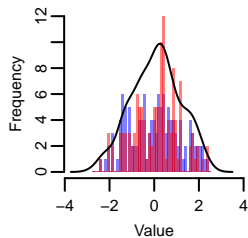

**B** Scatter plot

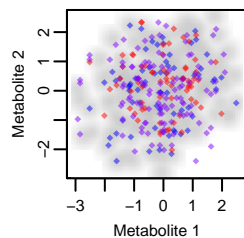

**C** MSD (observed, imputed)

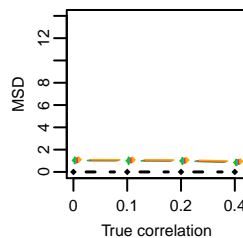

Histogram/data points  
 ■ original ■ observed ■ imputed ■ imputed in one metabolite only

Total proportion of missing values  
 ● - 0 ● 0.1 ● 0.3 ● 0.5 ● 0.7

**D** Bias cor

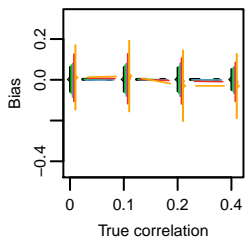

Bias pcor

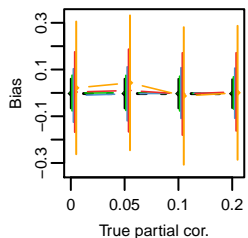

Bias lm phen ~ met

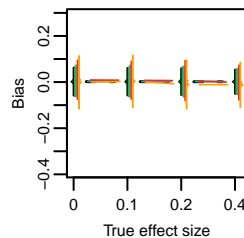

Bias lm met ~ phen

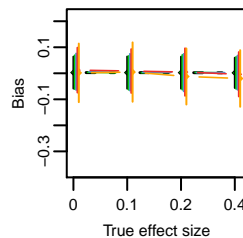

Bias logistic regr.

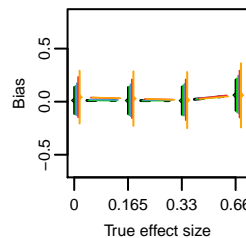

**E** Power cor

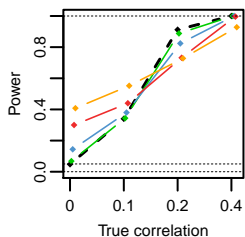

Power pcor

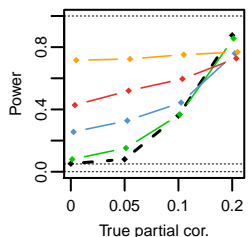

Power lm phen ~ met

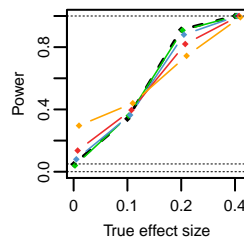

Power lm met ~ phen

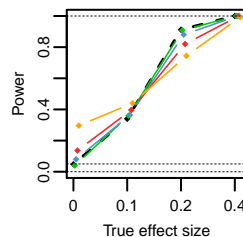

Power logistic regr.

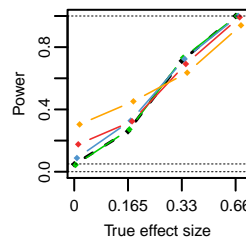

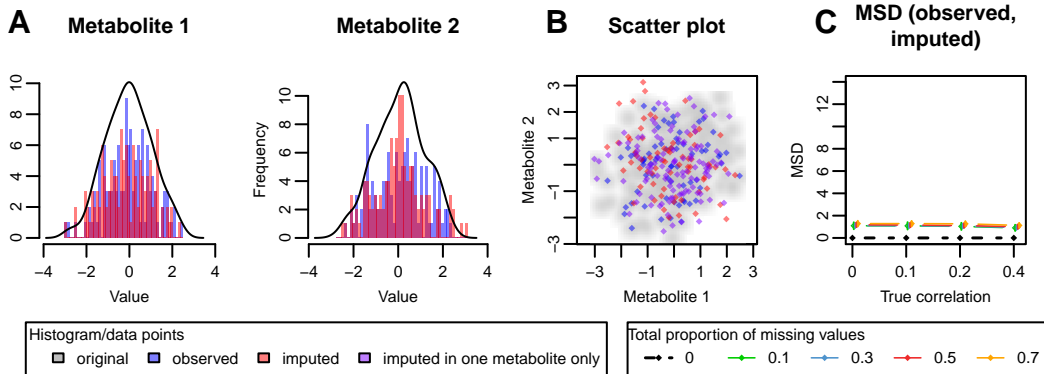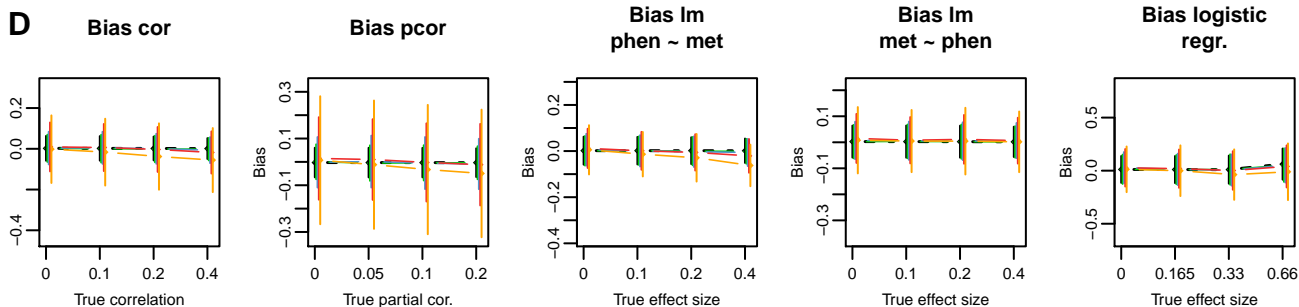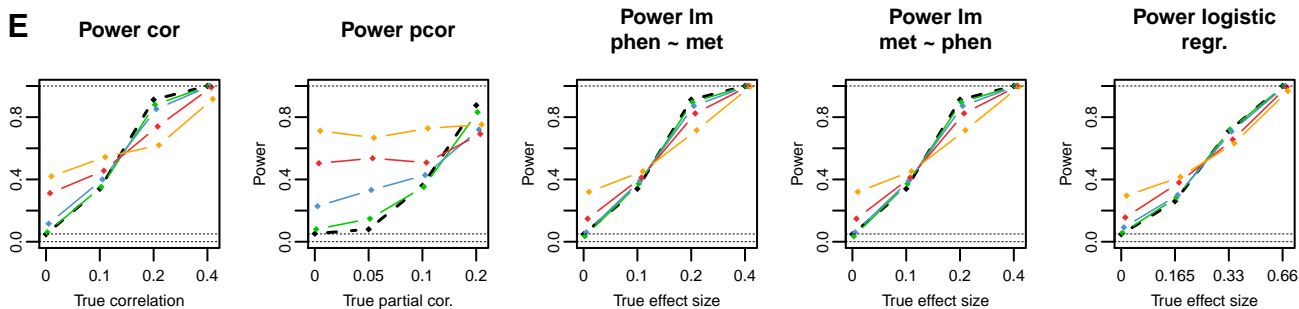

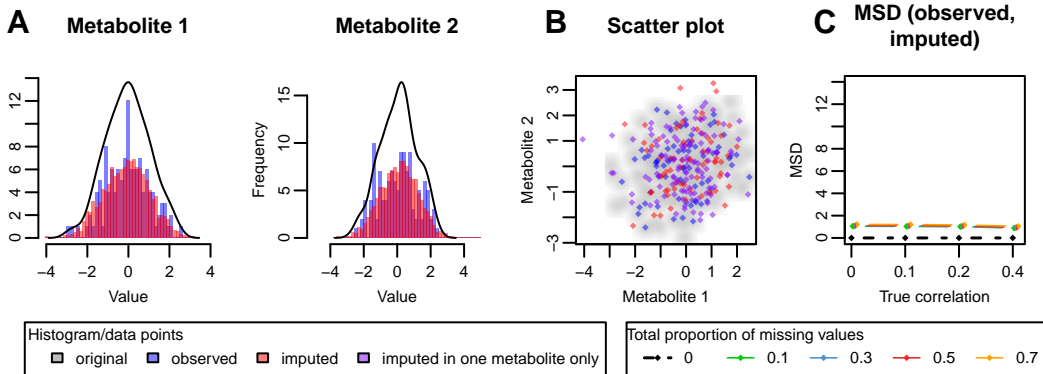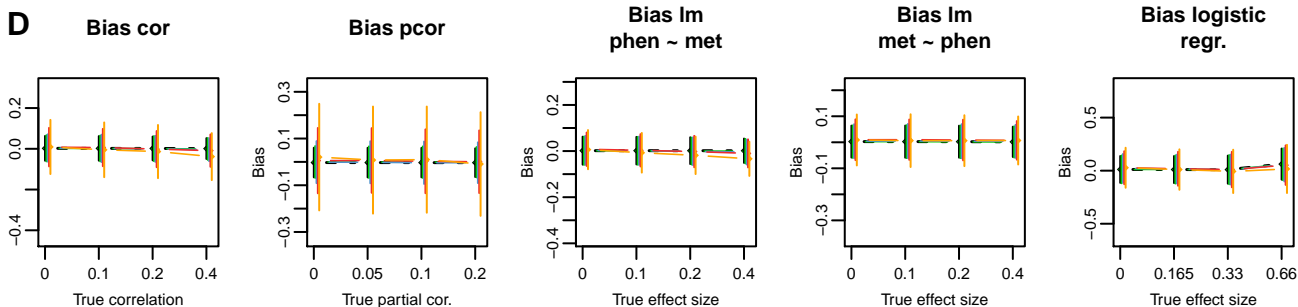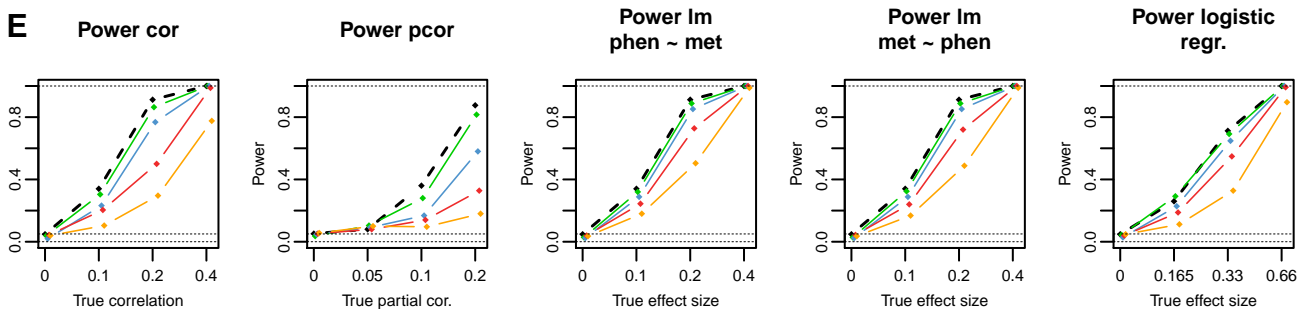

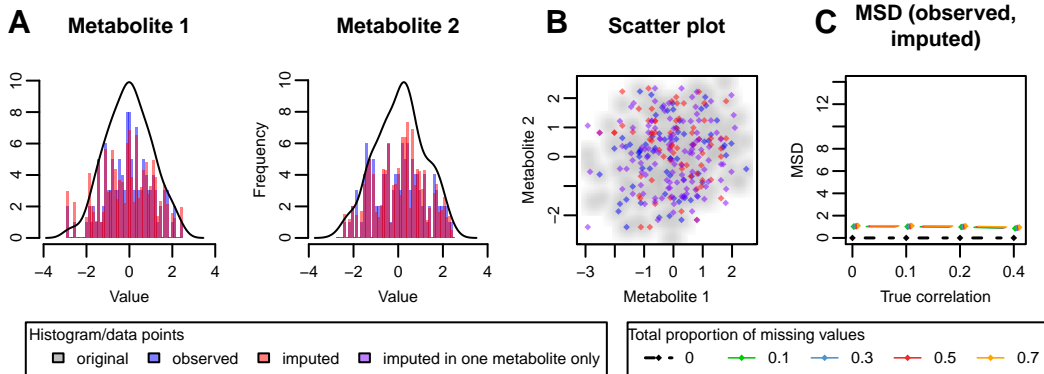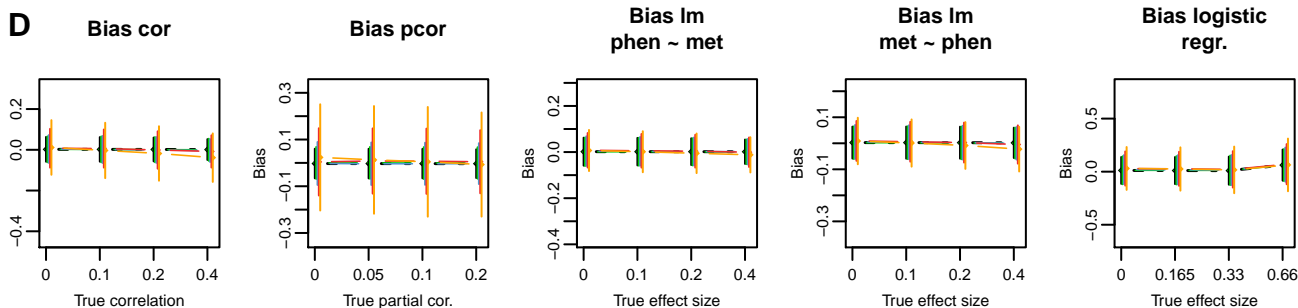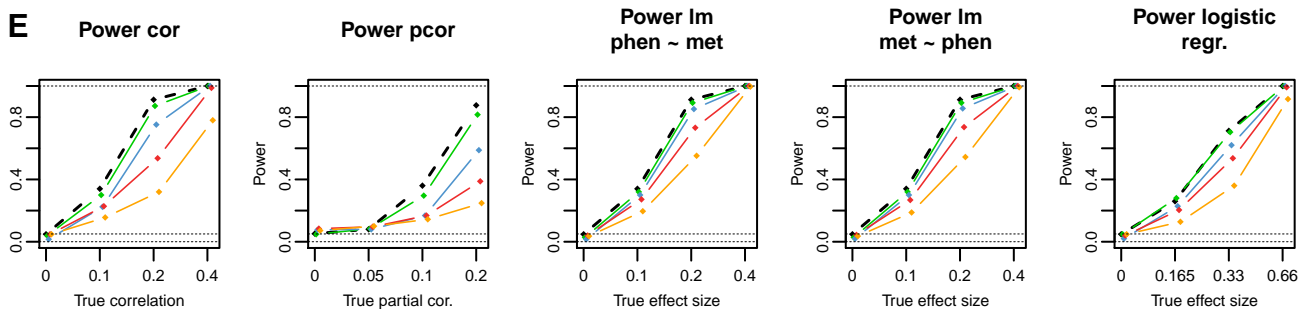

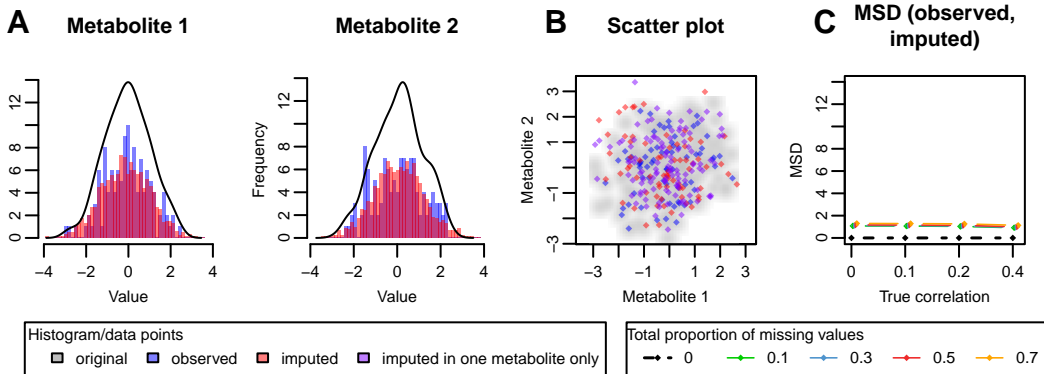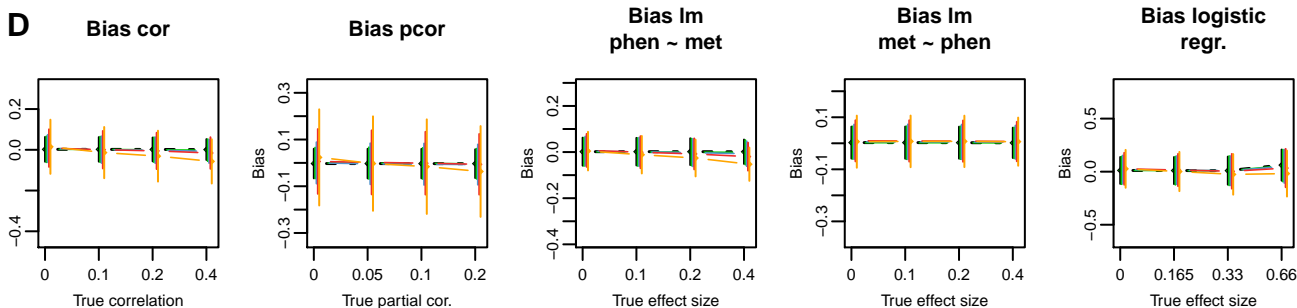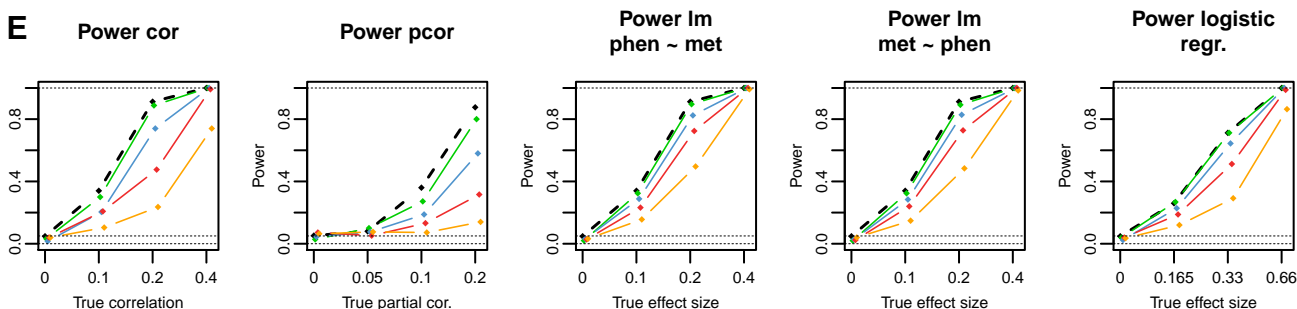



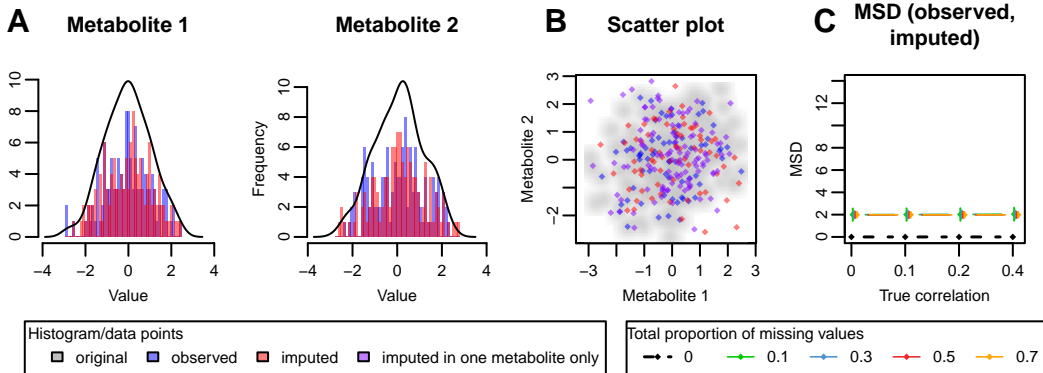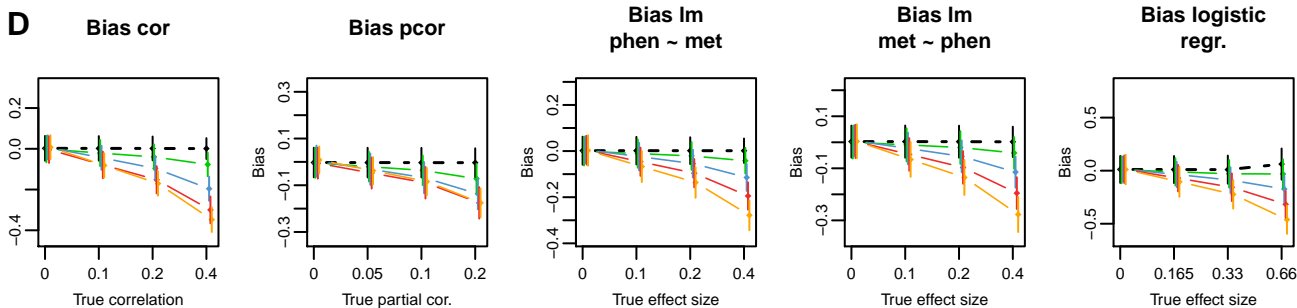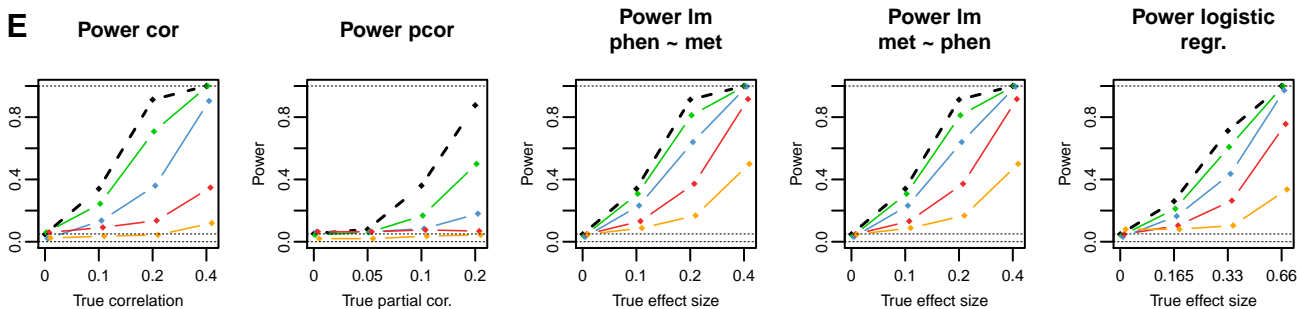

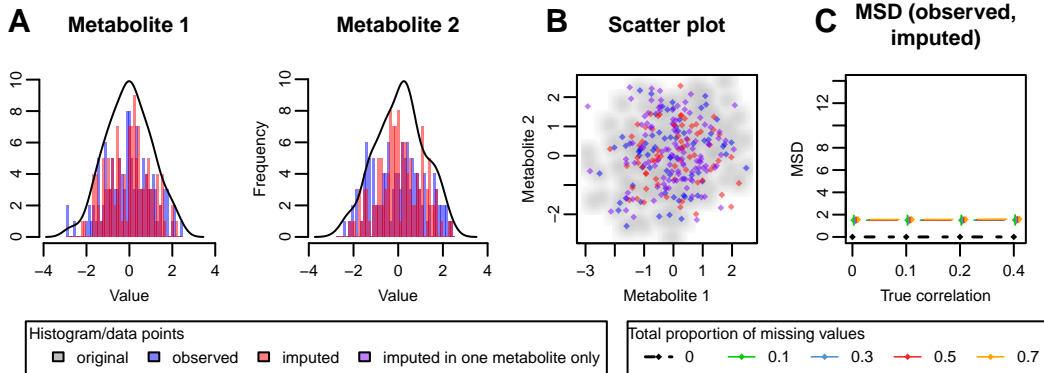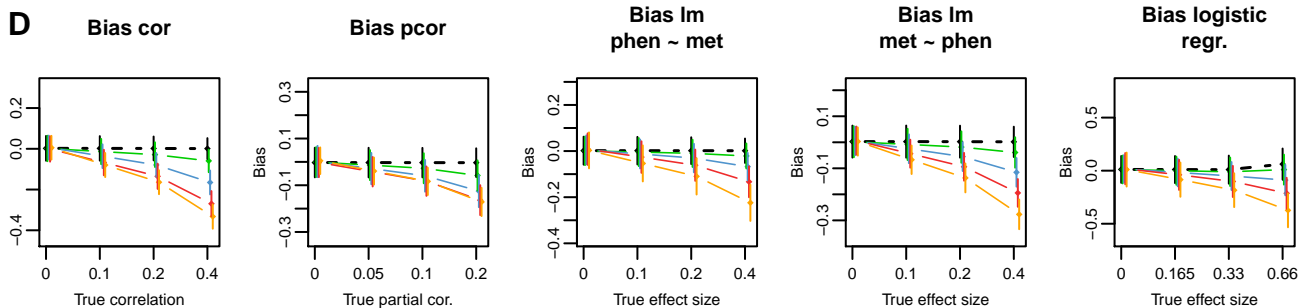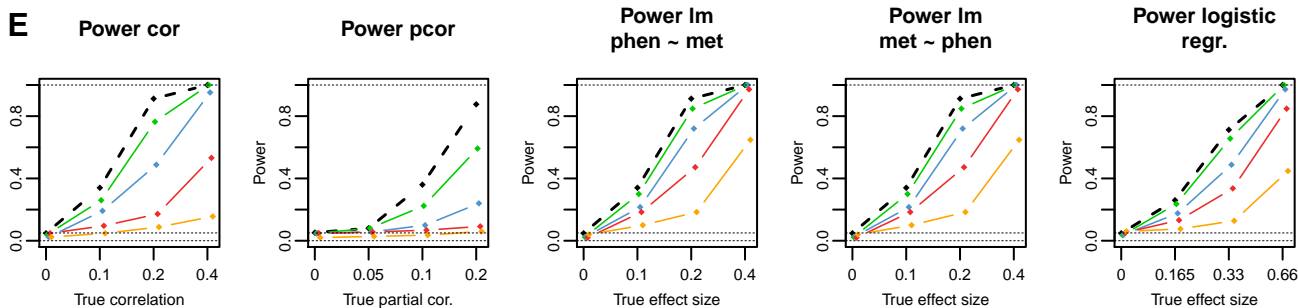

**A** Metabolite 1

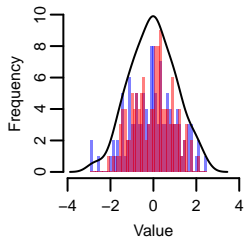

Metabolite 2

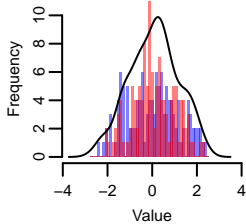

**B** Scatter plot

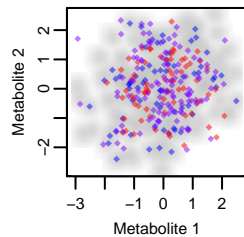

**C** MSD (observed, imputed)

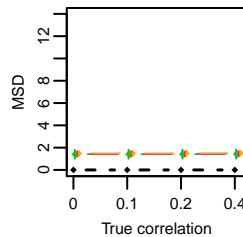

Histogram/data points

original observed imputed imputed in one metabolite only

Total proportion of missing values

0 0.1 0.3 0.5 0.7

**D** Bias cor

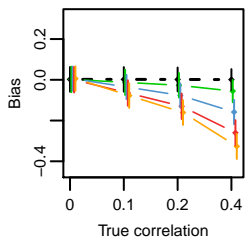

Bias pcor

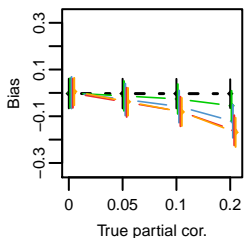

Bias lm phen ~ met

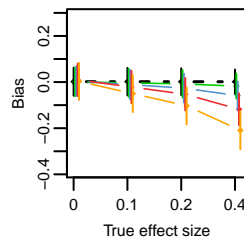

Bias lm met ~ phen

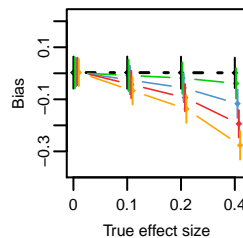

Bias logistic regr.

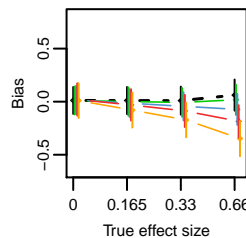

**E** Power cor

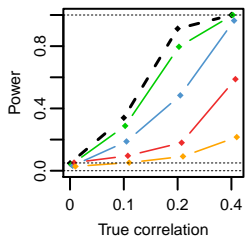

Power pcor

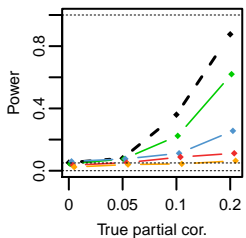

Power lm phen ~ met

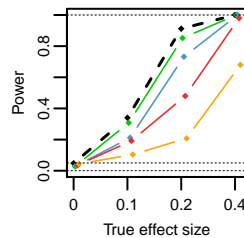

Power lm met ~ phen

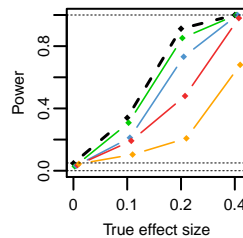

Power logistic regr.

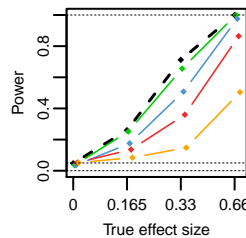

**A** Metabolite 1

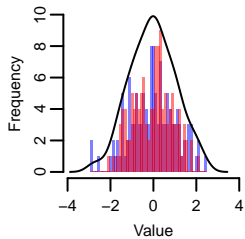

Metabolite 2

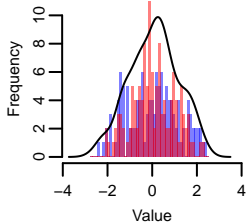

**B** Scatter plot

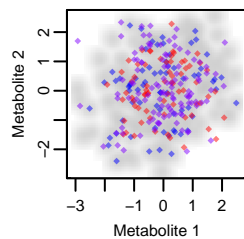

**C** MSD (observed, imputed)

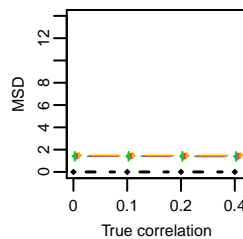

Histogram/data points

original observed imputed imputed in one metabolite only

Total proportion of missing values

0 0.1 0.3 0.5 0.7

**D** Bias cor

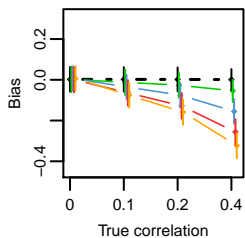

Bias pcor

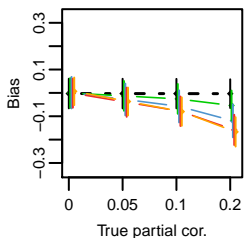

Bias lm phen ~ met

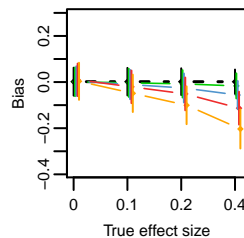

Bias lm met ~ phen

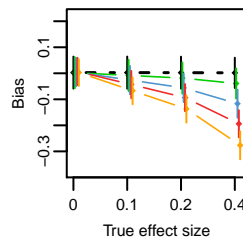

Bias logistic regr.

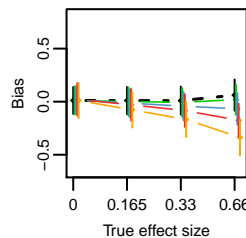

**E** Power cor

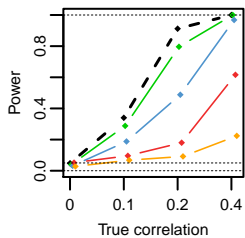

Power pcor

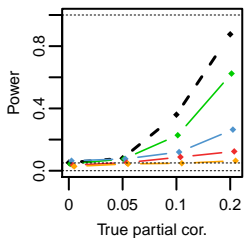

Power lm phen ~ met

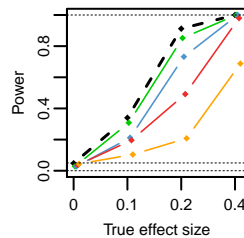

Power lm met ~ phen

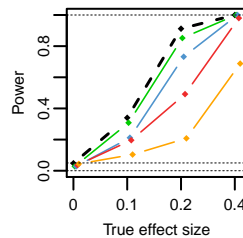

Power logistic regr.

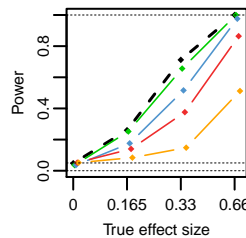

**A** Metabolite 1



Metabolite 2



**B** Scatter plot

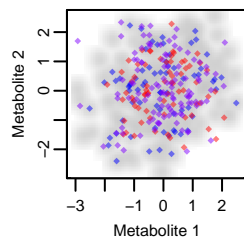

**C** MSD (observed, imputed)

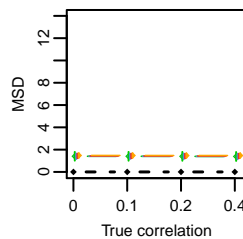

Histogram/data points

original observed imputed imputed in one metabolite only

Total proportion of missing values

0 0.1 0.3 0.5 0.7

**D** Bias cor

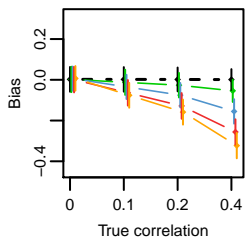

Bias pcor

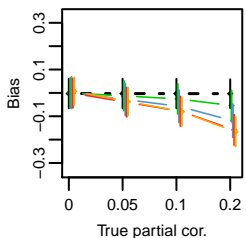

Bias Im phen ~ met



Bias Im met ~ phen



Bias logistic regr.



**E** Power cor

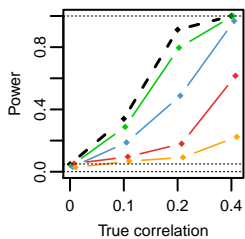

Power pcor

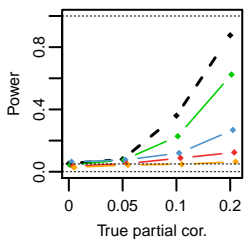

Power Im phen ~ met

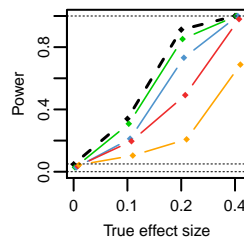

Power Im met ~ phen

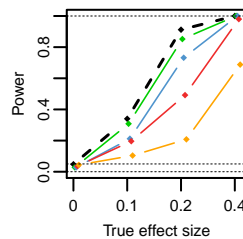

Power logistic regr.

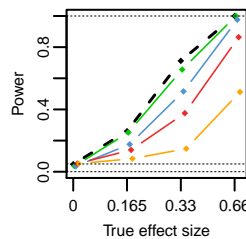

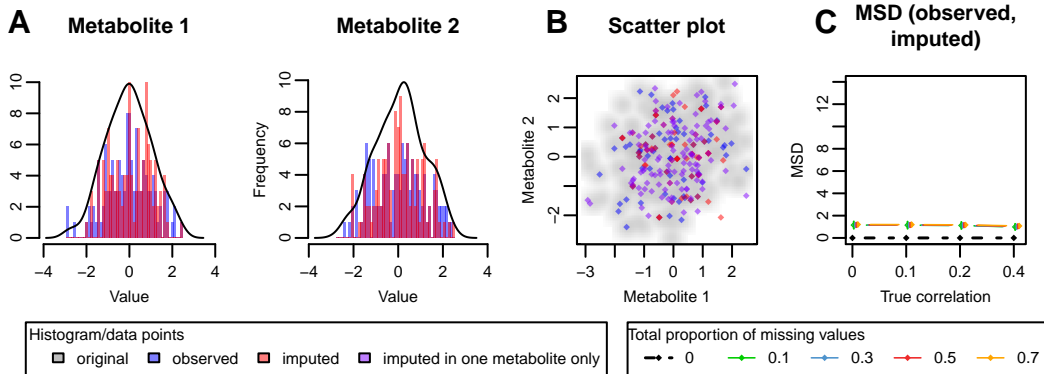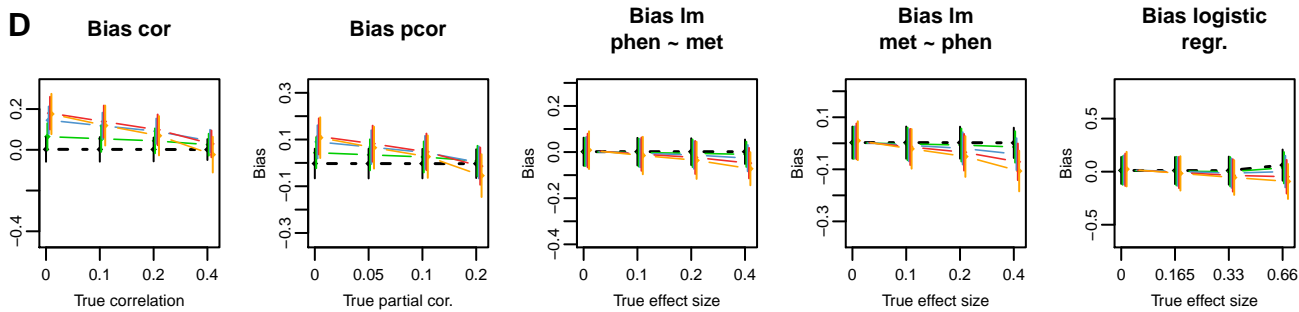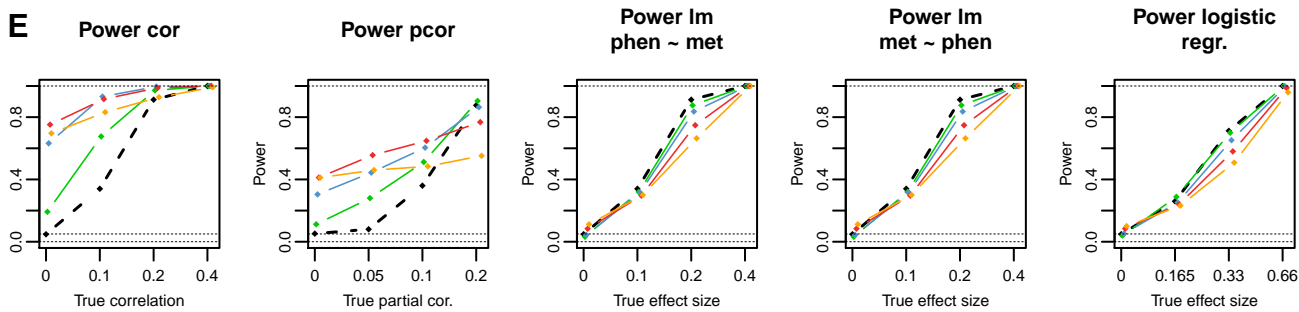

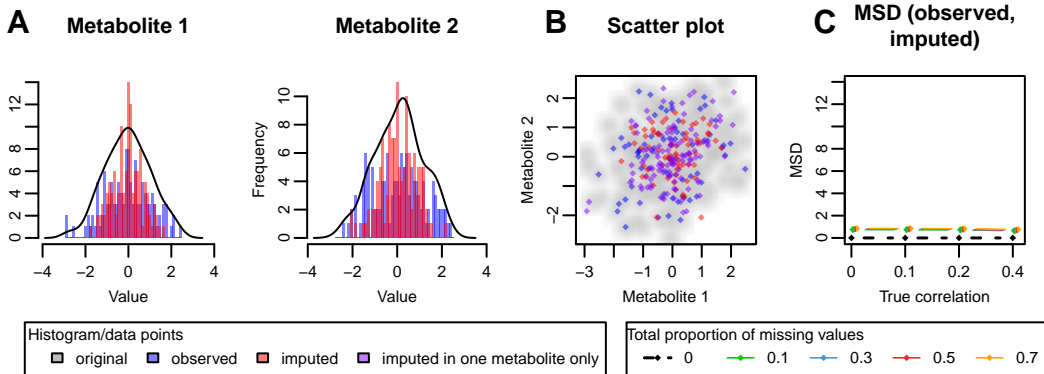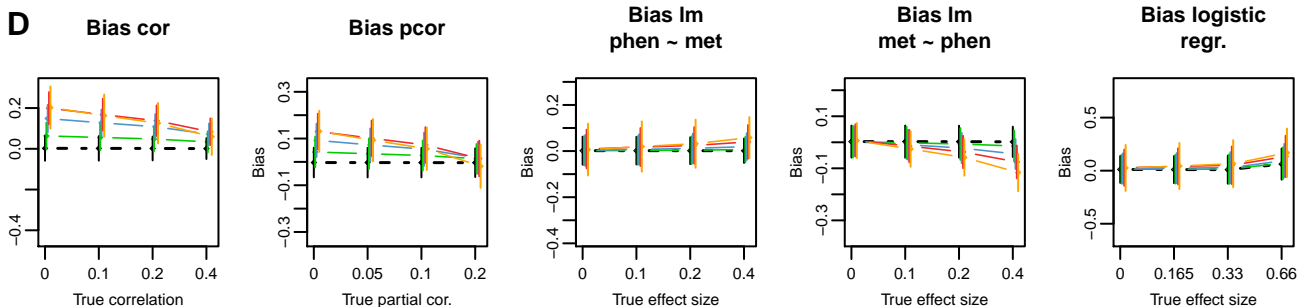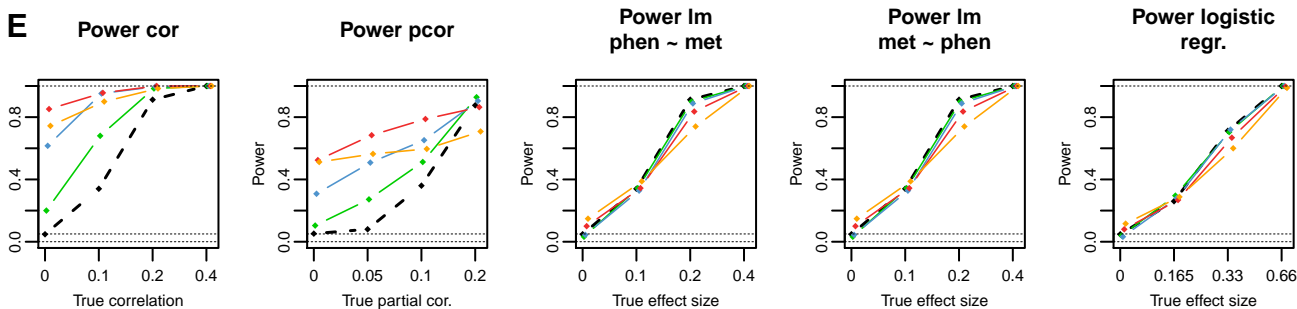

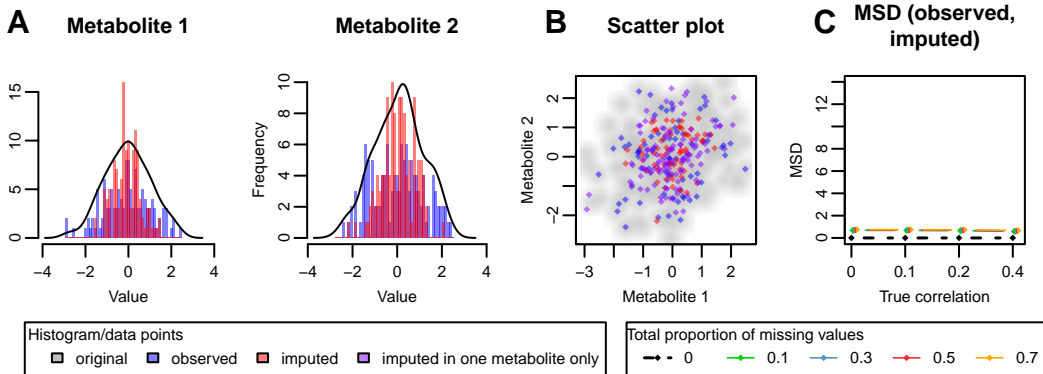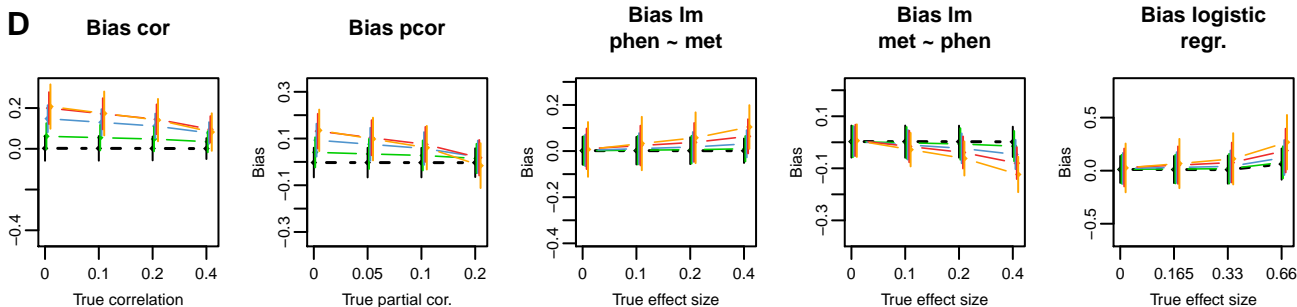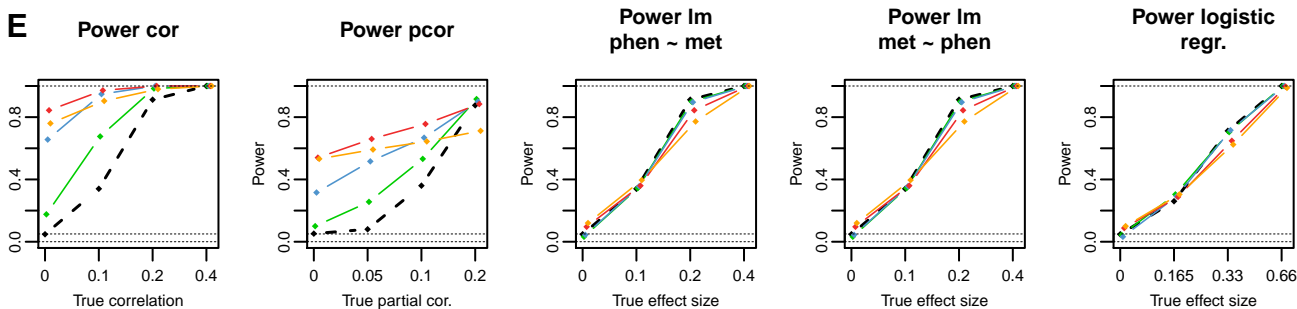



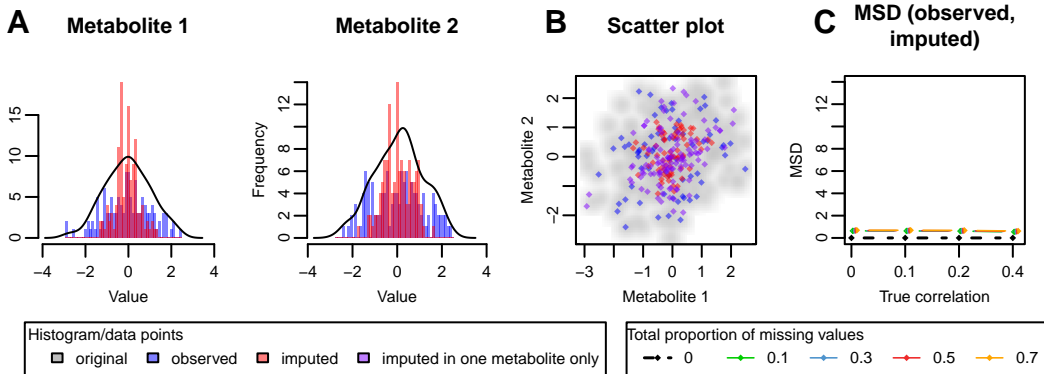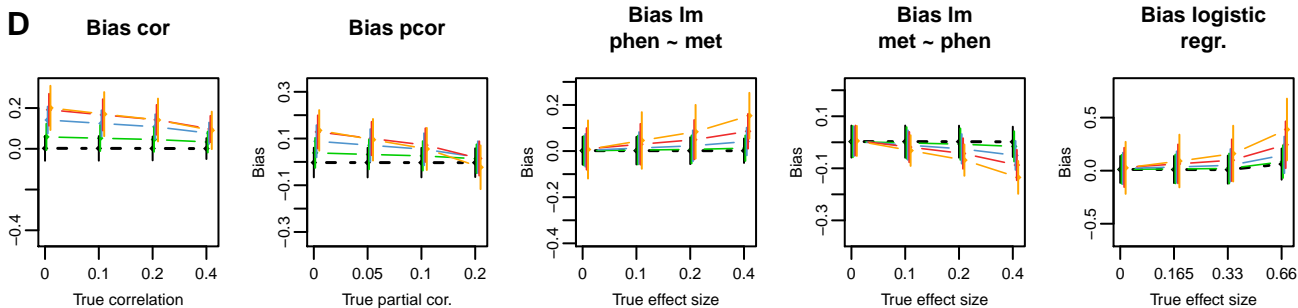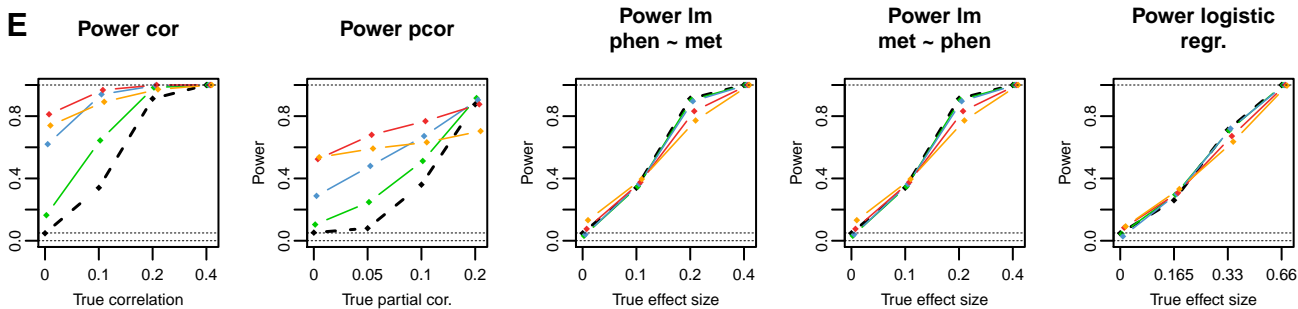

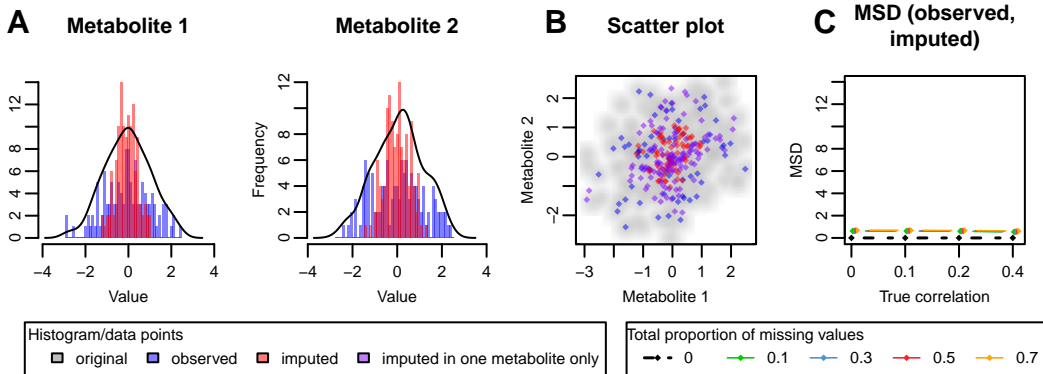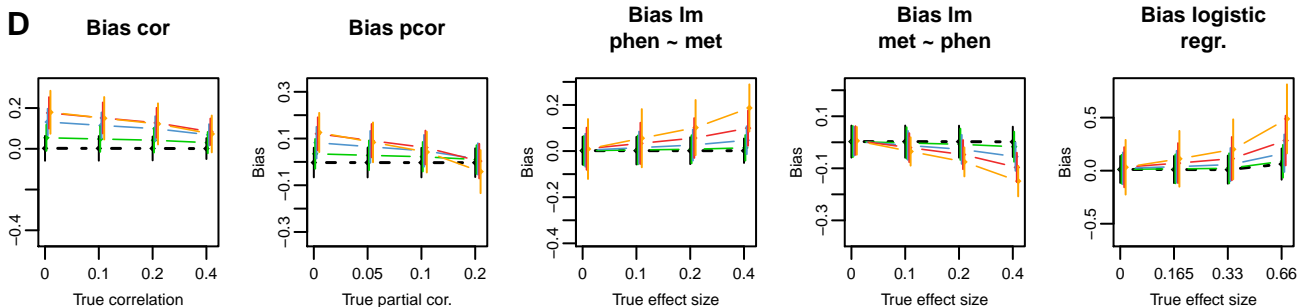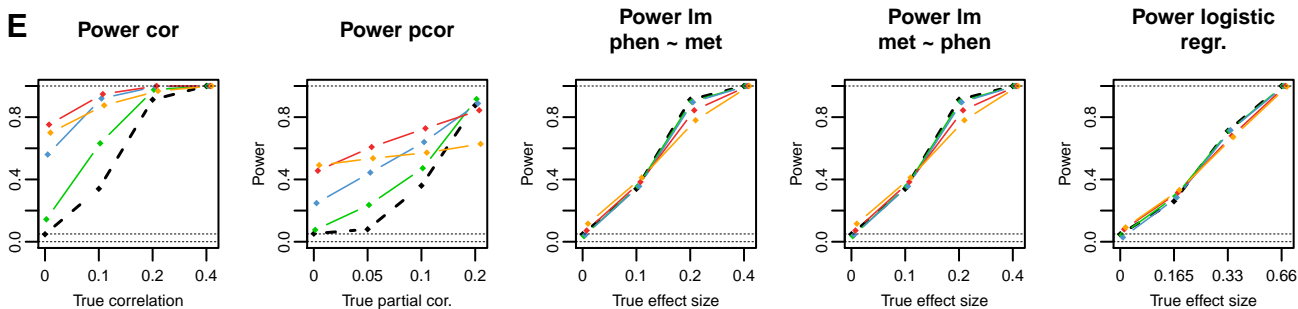

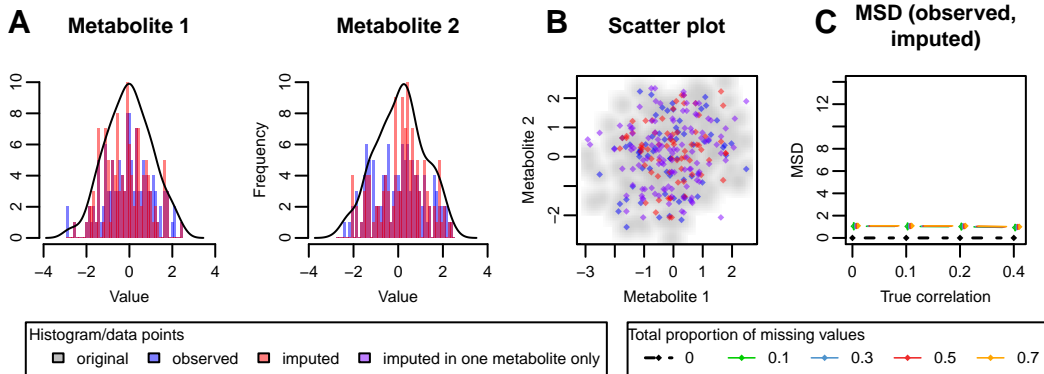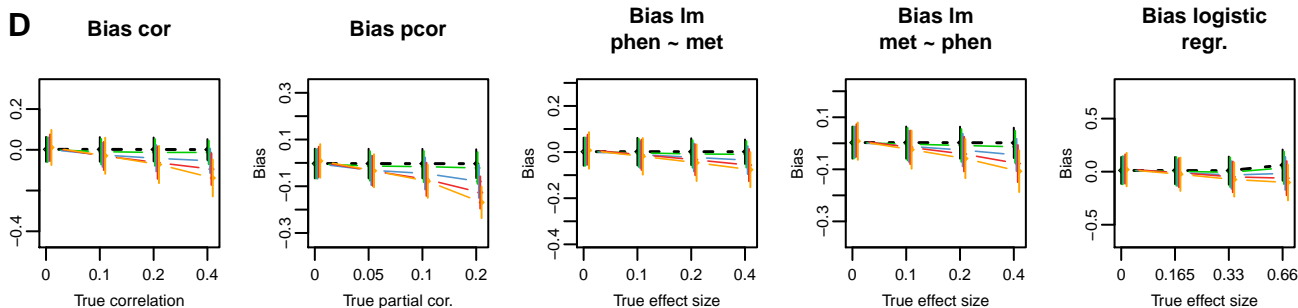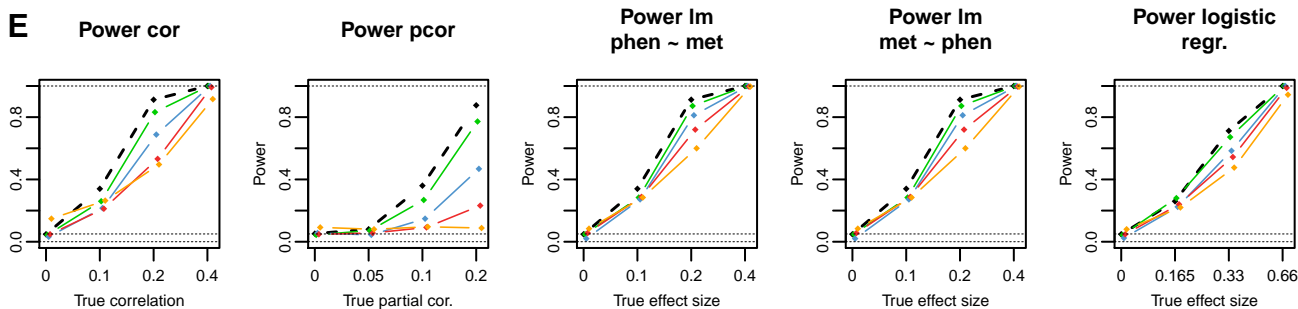

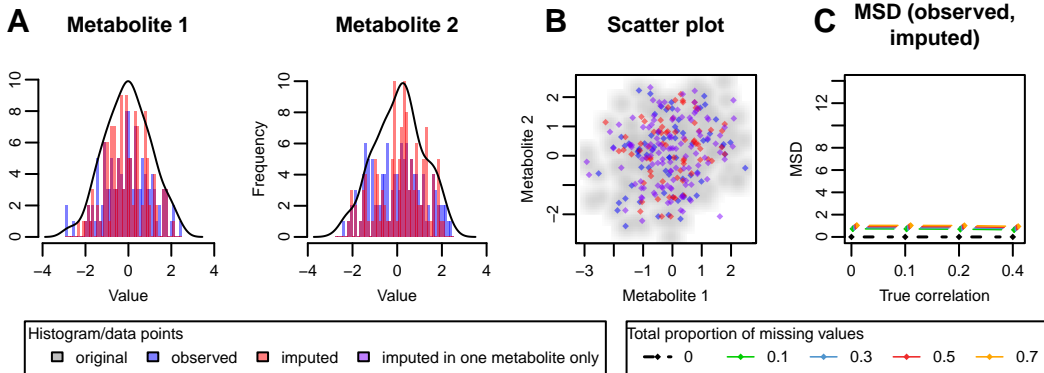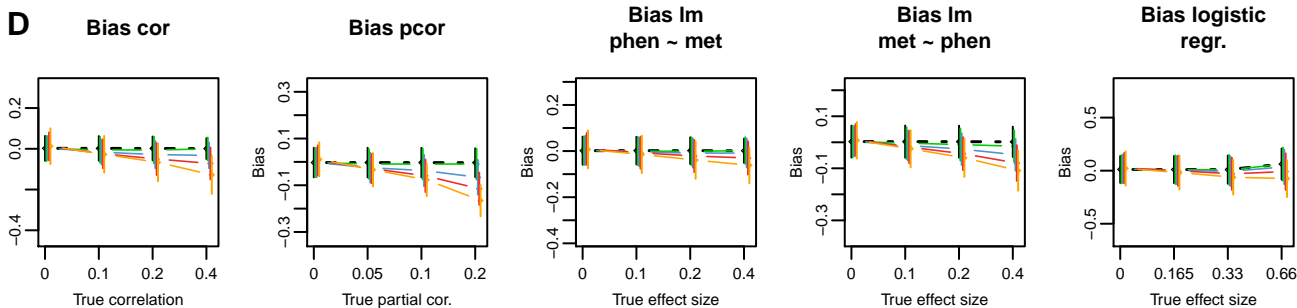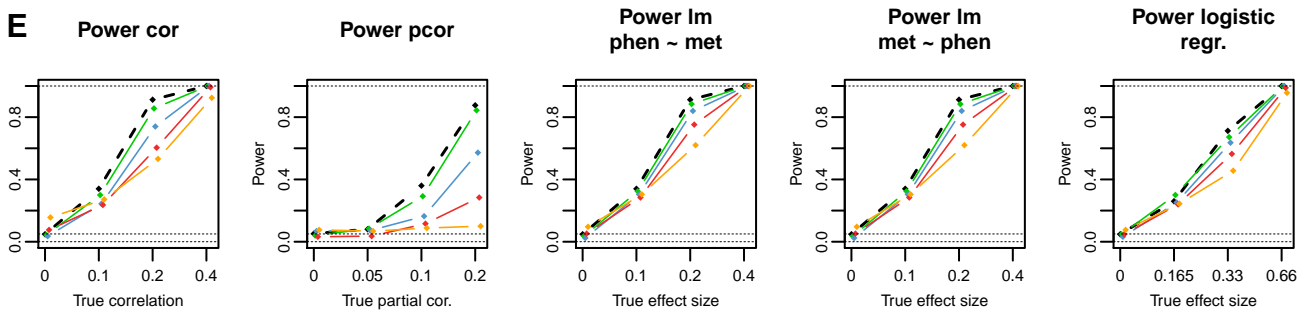

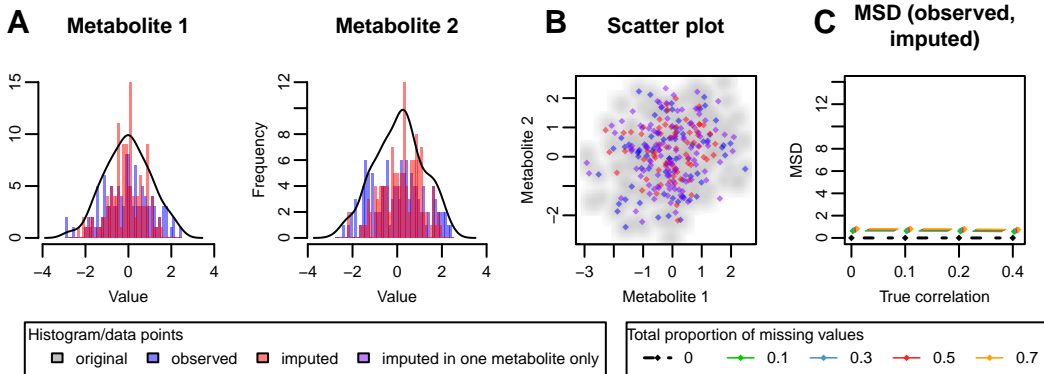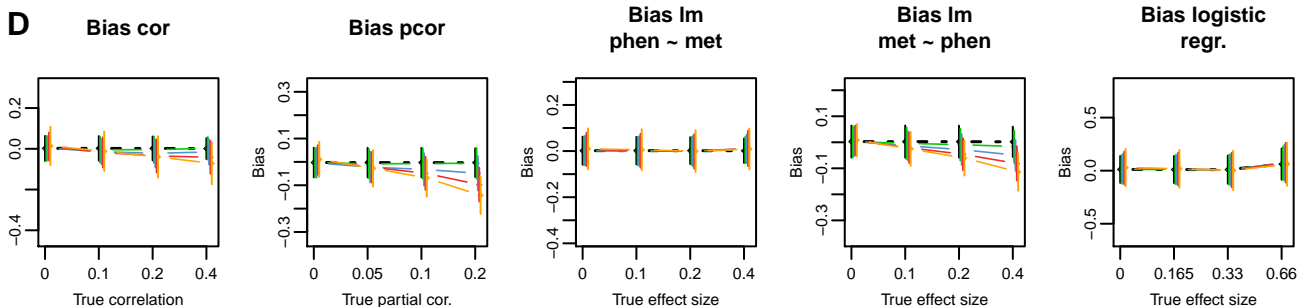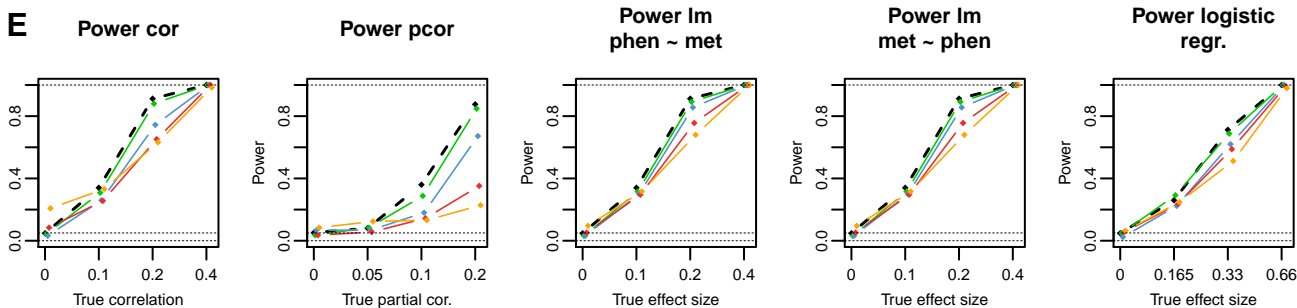

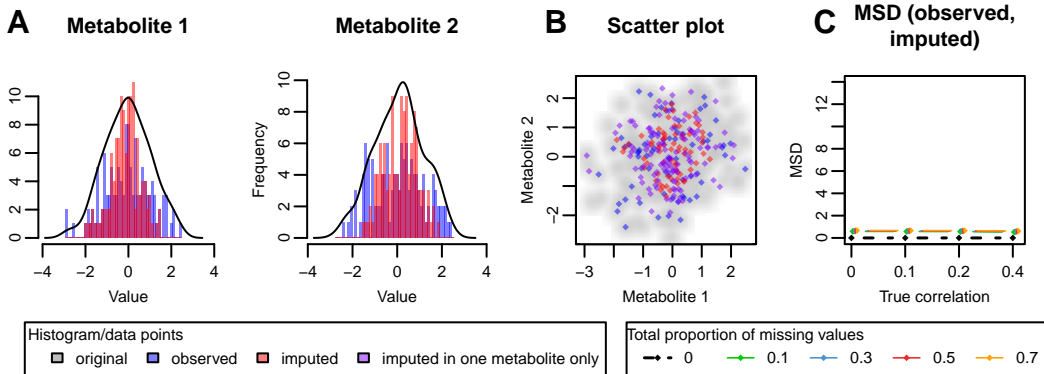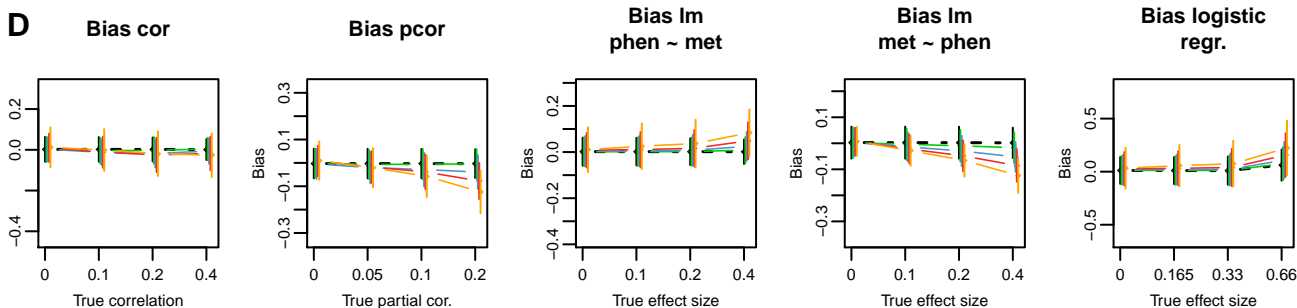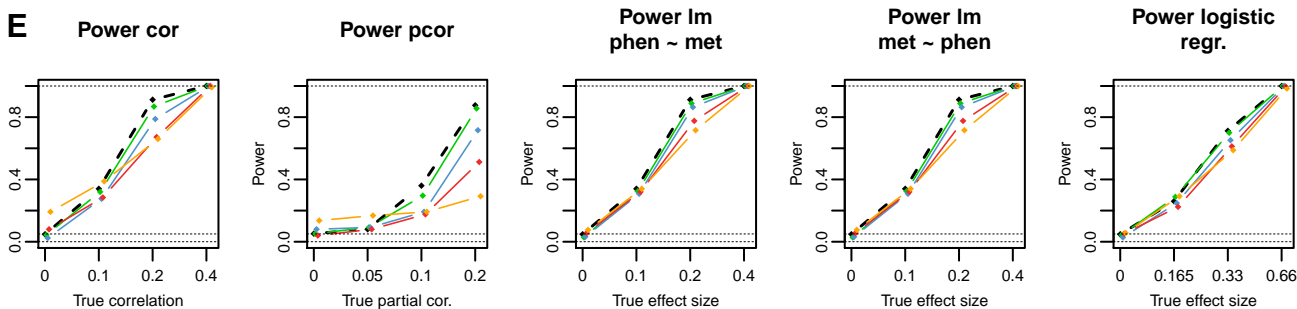

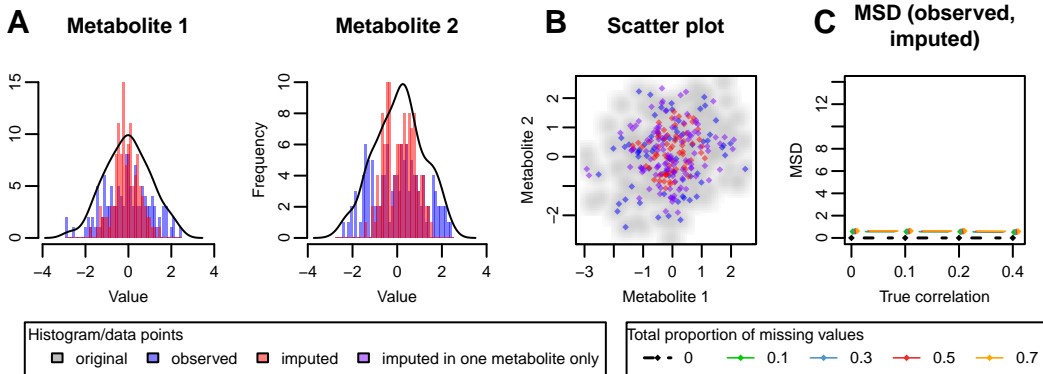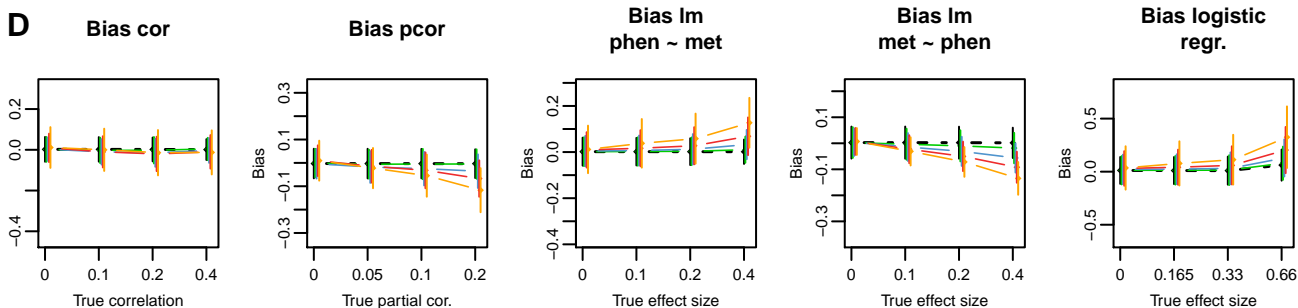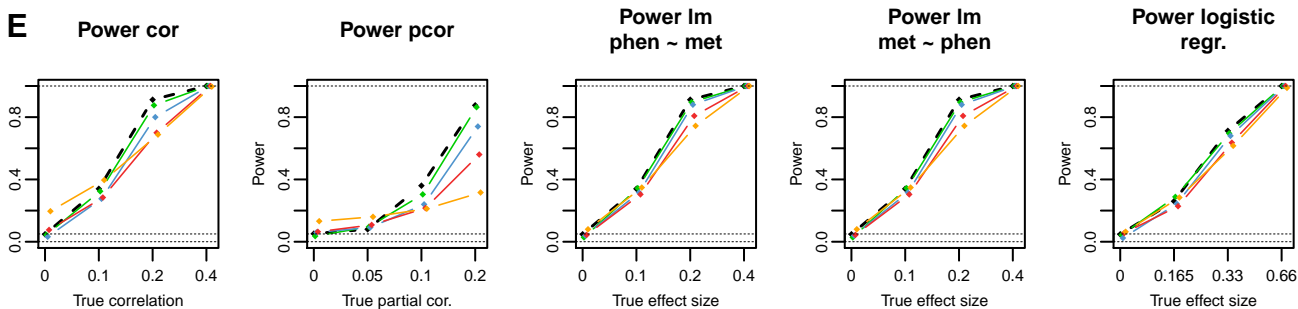

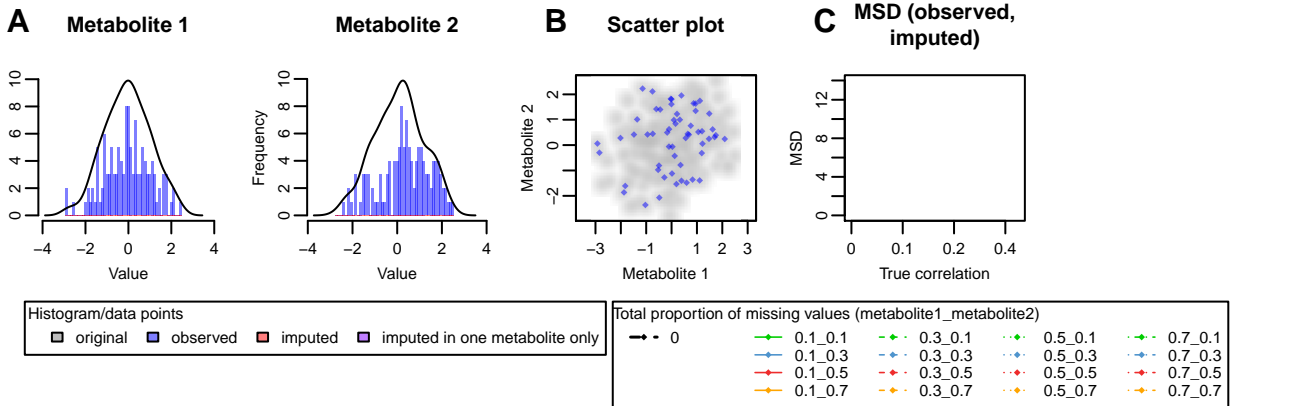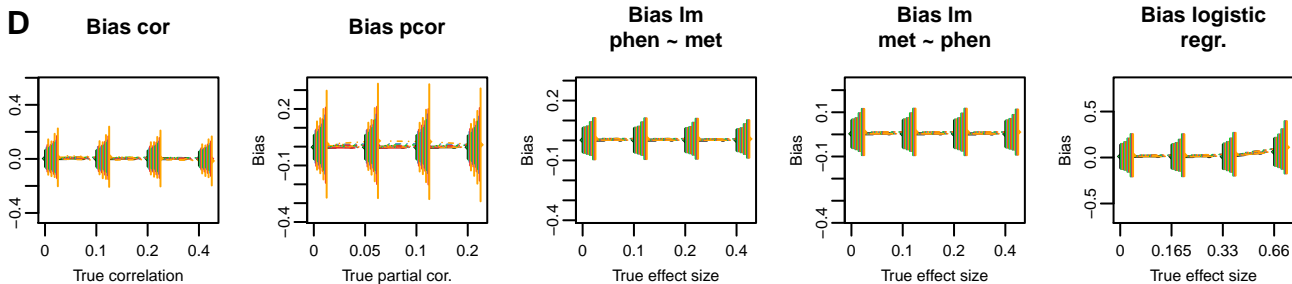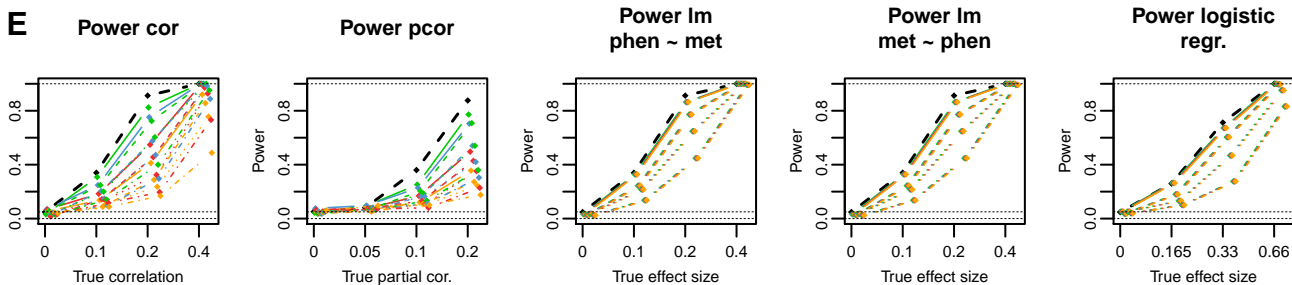



### A Metabolite 1

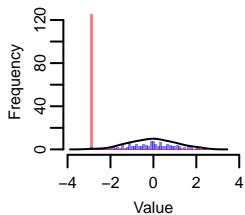

### Metabolite 2

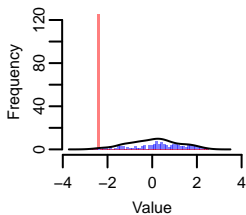

### B Scatter plot

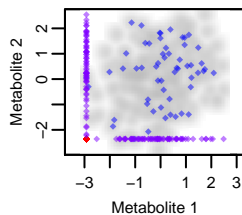

### C MSD (observed, imputed)

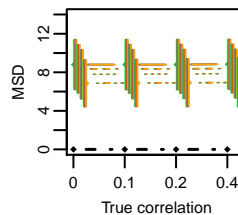

Histogram/data points

original observed imputed imputed in one metabolite only

Total proportion of missing values (metabolite1\_metabolite2)

- - 0  
 - - 0.1\_0.1  
 - - 0.1\_0.3  
 - - 0.1\_0.5  
 - - 0.1\_0.7  
 - - 0.3\_0.1  
 - - 0.3\_0.3  
 - - 0.3\_0.5  
 - - 0.3\_0.7  
 - - 0.5\_0.1  
 - - 0.5\_0.3  
 - - 0.5\_0.5  
 - - 0.5\_0.7  
 - - 0.7\_0.1  
 - - 0.7\_0.3  
 - - 0.7\_0.5  
 - - 0.7\_0.7

### D Bias cor

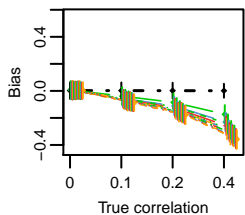

### Bias pcor

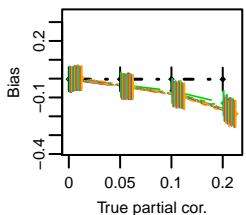

### Bias Im phen ~ met

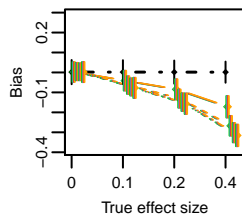

### Bias Im met ~ phen

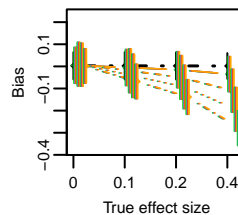

### Bias logistic regr.

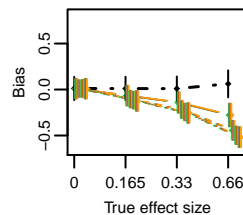

### E Power cor

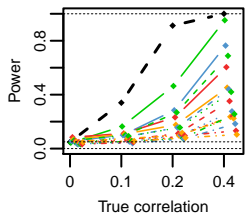

### Power pcor

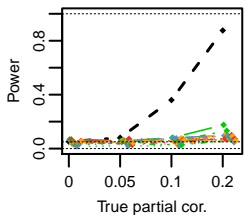

### Power Im phen ~ met

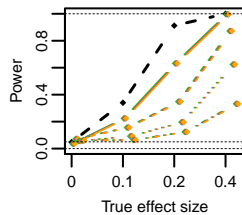

### Power Im met ~ phen

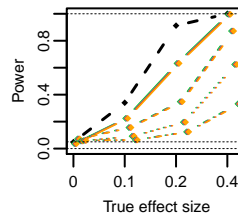

### Power logistic regr.

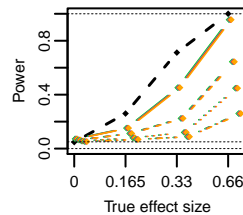

**A** Metabolite 1

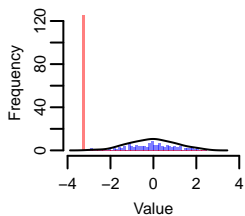

Metabolite 2

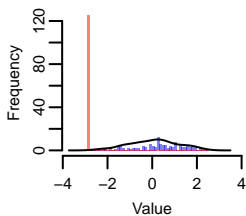

**B** Scatter plot

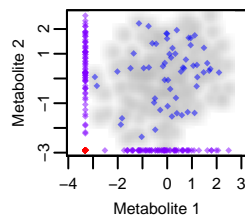

**C** MSD (observed, imputed)

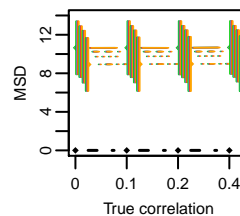

Histogram/data points

original observed imputed imputed in one metabolite only

Total proportion of missing values (metabolite1\_metabolite2)

0 0.1\_0.1 0.3\_0.1 0.5\_0.1 0.7\_0.1  
 0.1\_0.3 0.3\_0.3 0.5\_0.3 0.7\_0.3  
 0.1\_0.5 0.3\_0.5 0.5\_0.5 0.7\_0.5  
 0.1\_0.7 0.3\_0.7 0.5\_0.7 0.7\_0.7

**D** Bias cor

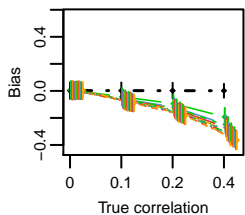

Bias pcor

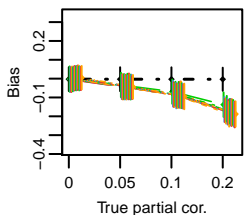

Bias Im phen ~ met

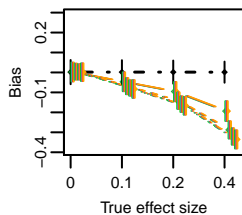

Bias Im met ~ phen

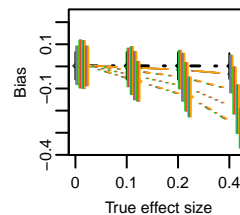

Bias logistic regr.

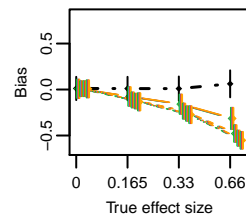

**E** Power cor

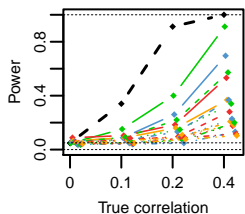

Power pcor

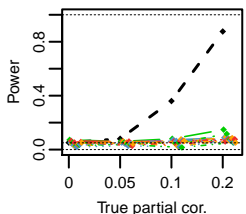

Power Im phen ~ met

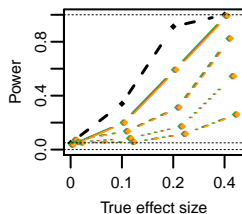

Power Im met ~ phen

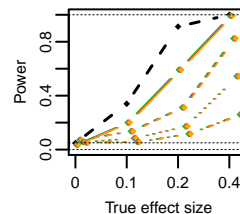

Power logistic regr.

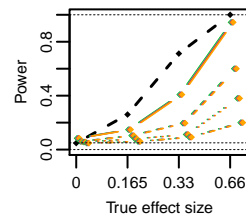

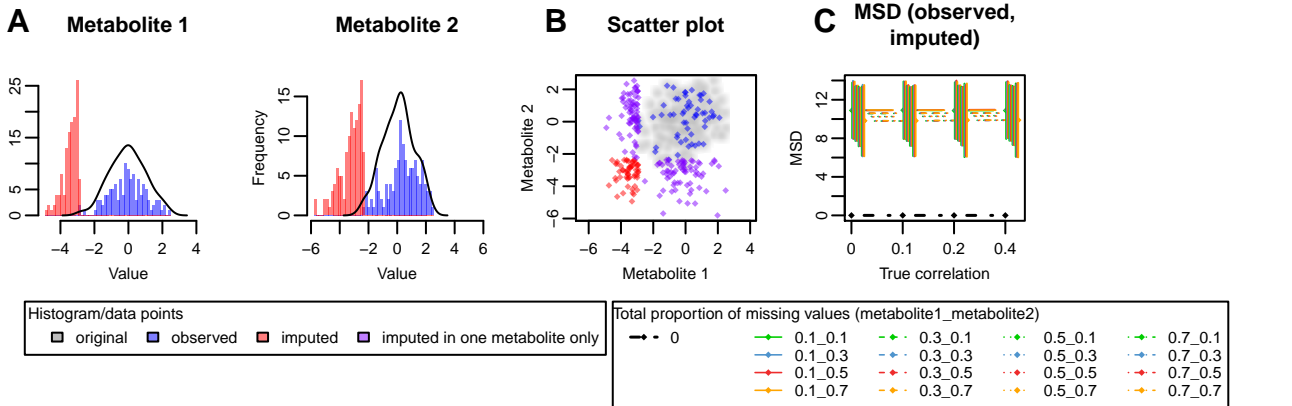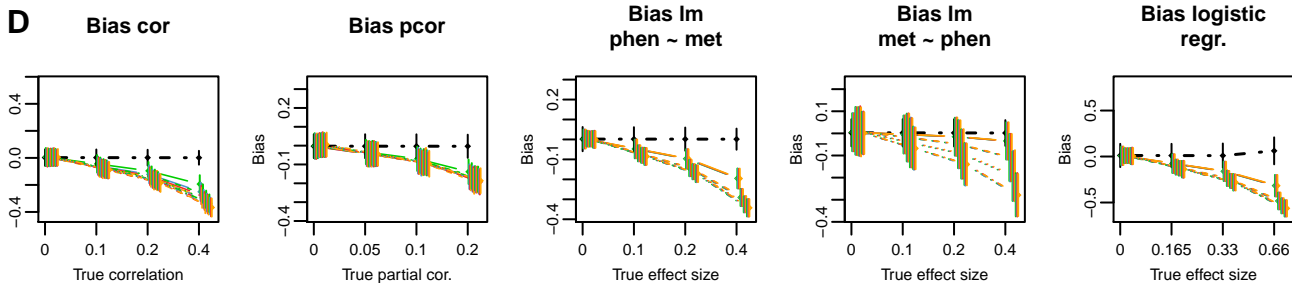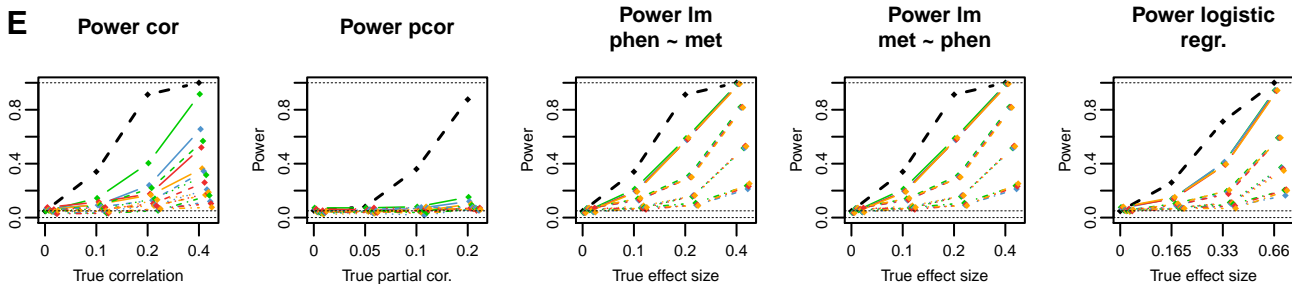

### A Metabolite 1

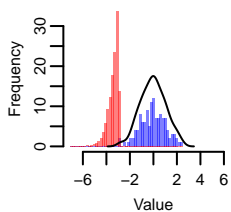

### Metabolite 2

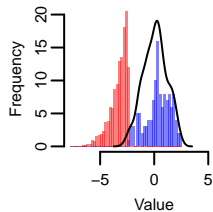

### B Scatter plot

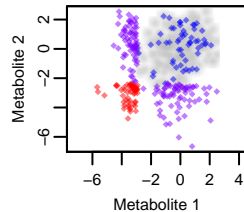

### C MSD (observed, imputed)

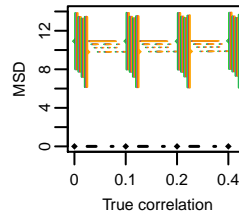

Histogram/data points

original observed imputed imputed in one metabolite only

Total proportion of missing values (metabolite1-metabolite2)

0 0.1\_0.1 0.1\_0.3 0.1\_0.5 0.1\_0.7 0.3\_0.1 0.3\_0.3 0.3\_0.5 0.3\_0.7 0.5\_0.1 0.5\_0.3 0.5\_0.5 0.5\_0.7 0.7\_0.1 0.7\_0.3 0.7\_0.5 0.7\_0.7

### D Bias cor

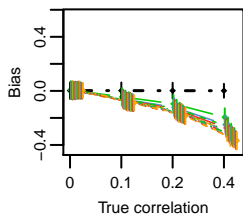

### Bias pcor

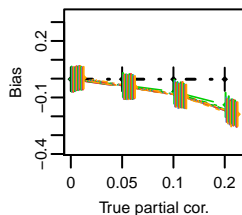

### Bias Im phen ~ met

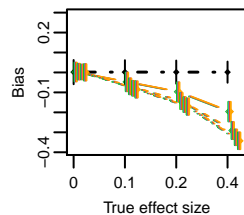

### Bias Im met ~ phen

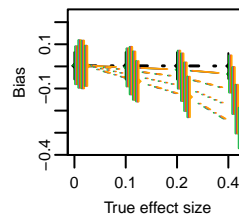

### Bias logistic regr.

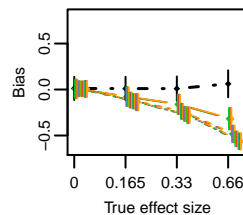

### E Power cor

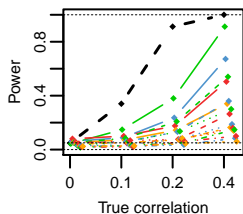

### Power pcor

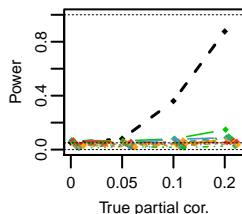

### Power Im phen ~ met

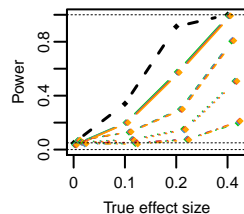

### Power Im met ~ phen

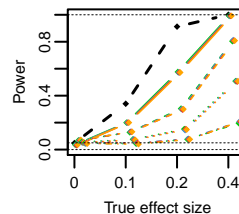

### Power logistic regr.

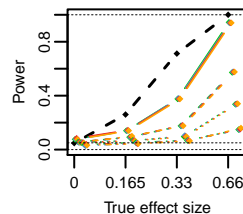

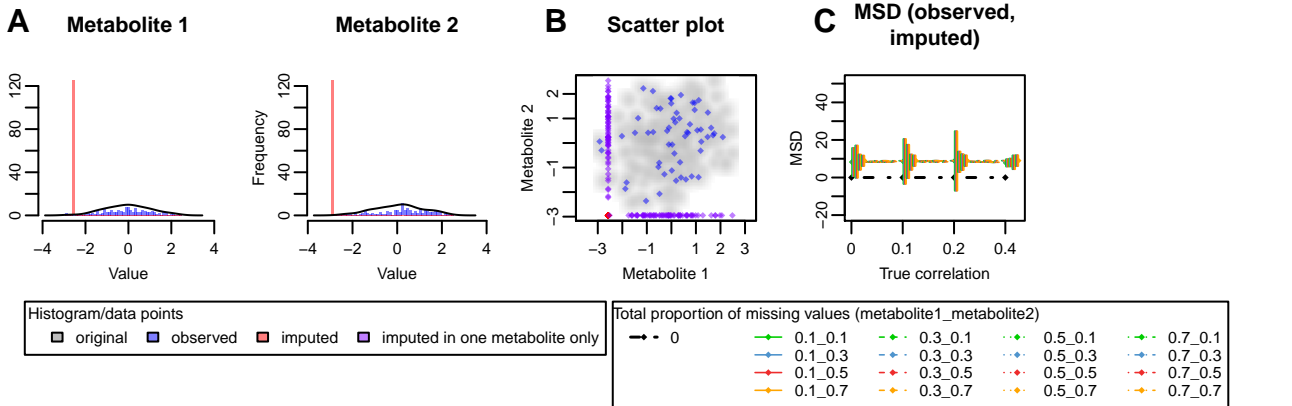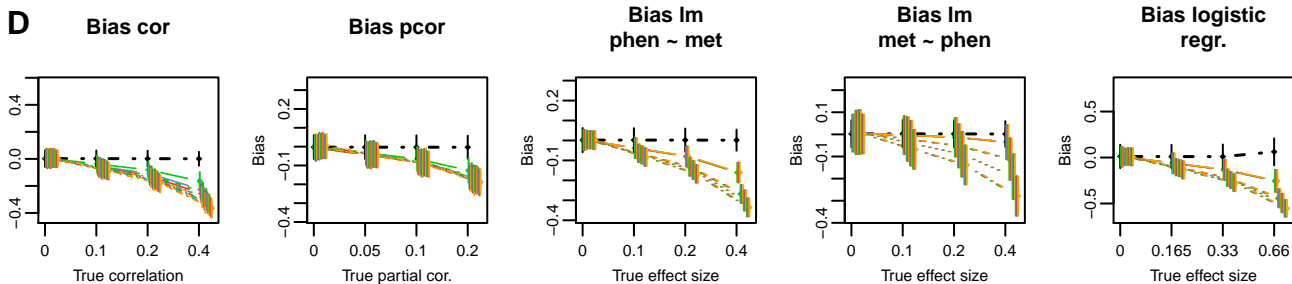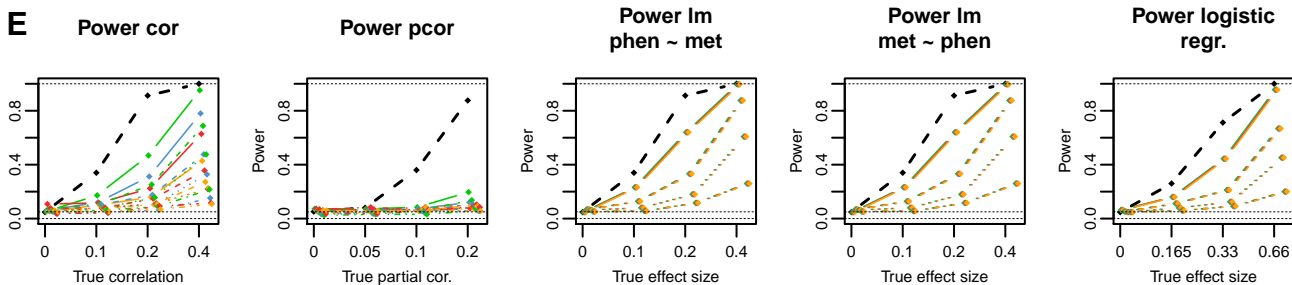

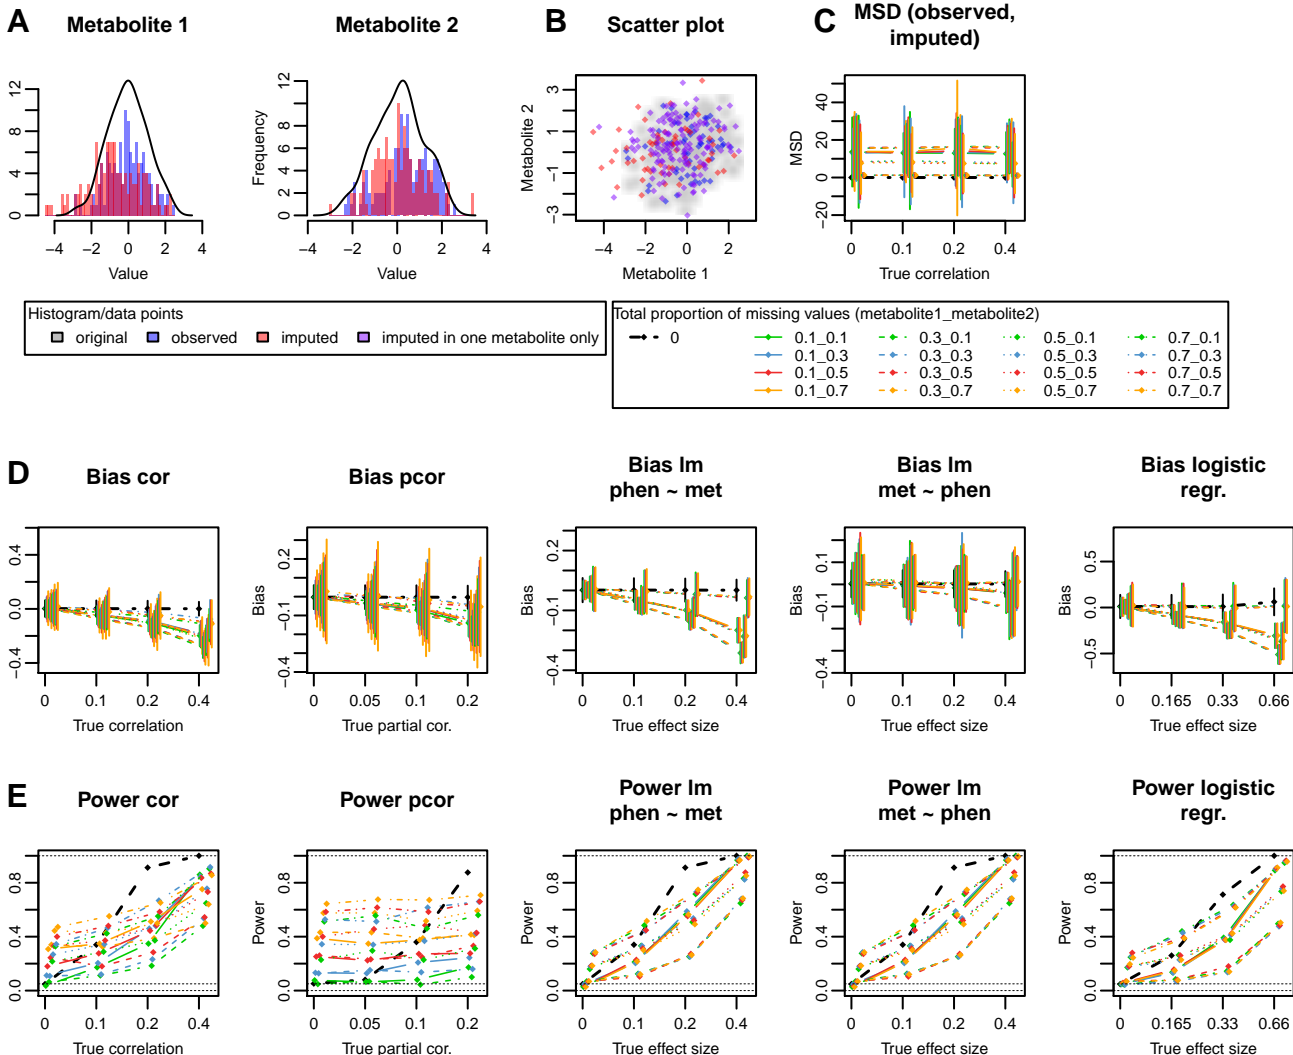

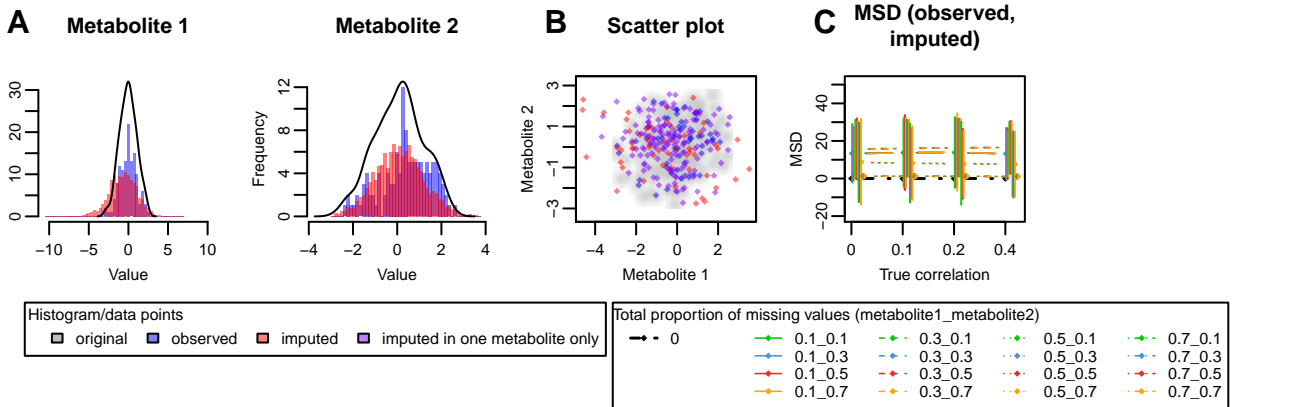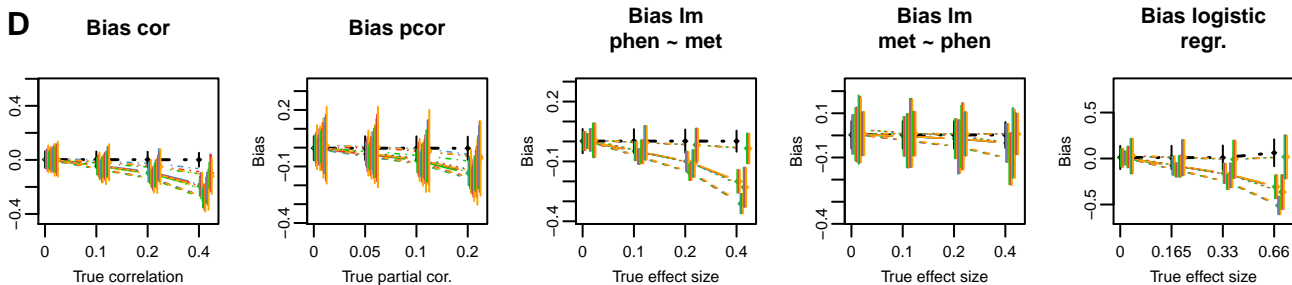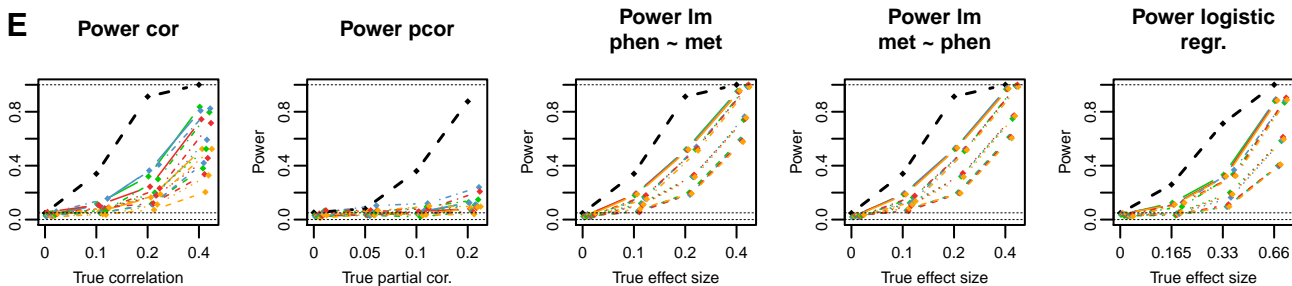

### A Metabolite 1

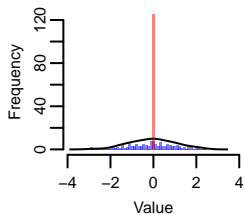

### Metabolite 2

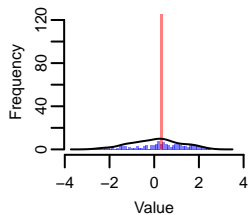

### B Scatter plot

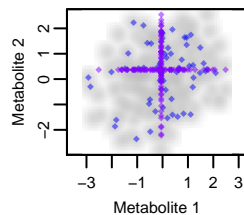

### C MSD (observed, imputed)

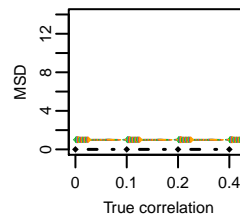

Histogram/data points

original observed imputed imputed in one metabolite only

Total proportion of missing values (metabolite1\_metabolite2)

- - 0  
 0.1\_0.1 0.3\_0.1 0.5\_0.1 0.7\_0.1  
 0.1\_0.3 0.3\_0.3 0.5\_0.3 0.7\_0.3  
 0.1\_0.5 0.3\_0.5 0.5\_0.5 0.7\_0.5  
 0.1\_0.7 0.3\_0.7 0.5\_0.7 0.7\_0.7

### D Bias cor

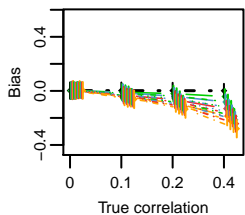

### Bias pcor

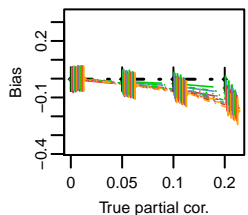

### Bias Im phen ~ met

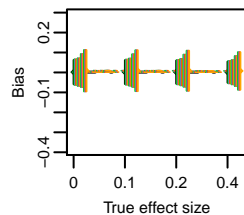

### Bias Im met ~ phen

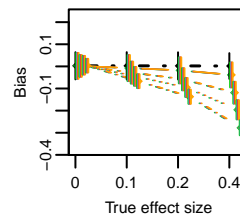

### Bias logistic regr.

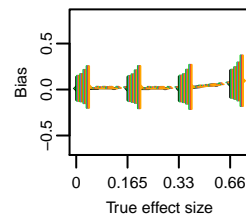

### E Power cor

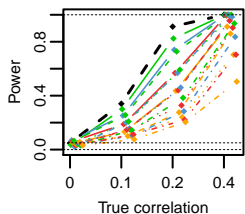

### Power pcor

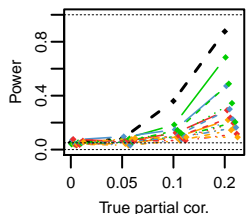

### Power Im phen ~ met

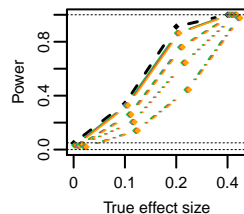

### Power Im met ~ phen

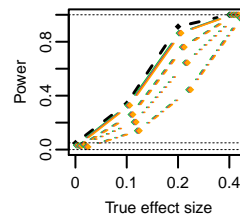

### Power logistic regr.

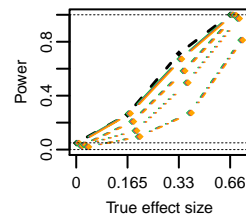



**A** Metabolite 1

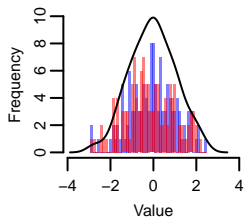

Metabolite 2

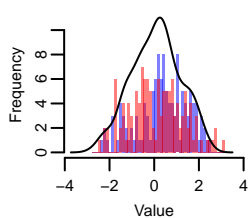

**B** Scatter plot

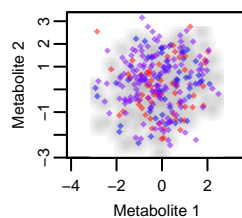

**C** MSD (observed, imputed)

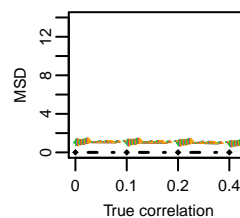

Histogram/data points

original observed imputed imputed in one metabolite only

Total proportion of missing values (metabolite1\_metabolite2)

- - 0  
 0.1\_0.1 0.1\_0.3 0.1\_0.5 0.1\_0.7  
 0.3\_0.1 0.3\_0.3 0.3\_0.5 0.3\_0.7  
 0.5\_0.1 0.5\_0.3 0.5\_0.5 0.5\_0.7  
 0.7\_0.1 0.7\_0.3 0.7\_0.5 0.7\_0.7

**D** Bias cor

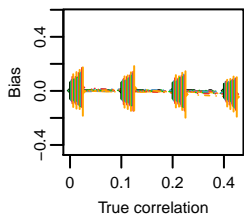

Bias pcor

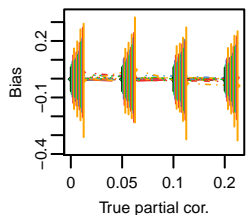

Bias Im phen ~ met

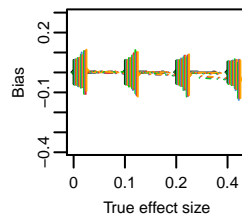

Bias Im met ~ phen

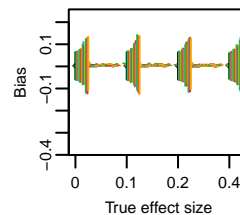

Bias logistic regr.

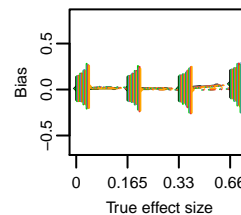

**E** Power cor

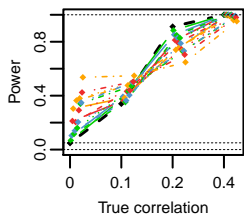

Power pcor

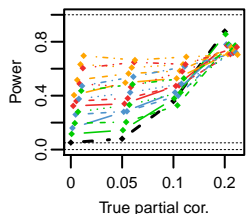

Power Im phen ~ met

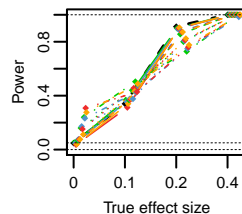

Power Im met ~ phen

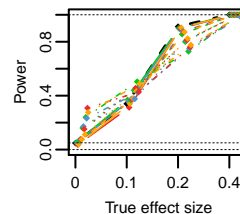

Power logistic regr.

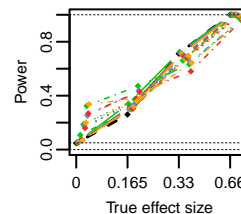

**A** Metabolite 1

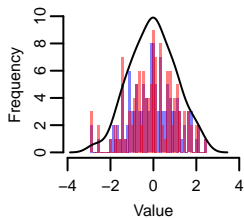

Metabolite 2

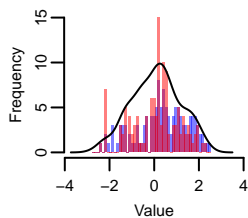

**B** Scatter plot

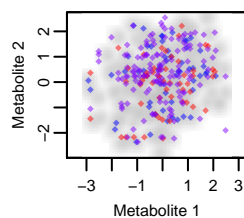

**C** MSD (observed, imputed)

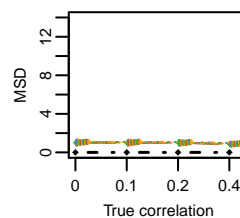

Histogram/data points

original observed imputed imputed in one metabolite only

Total proportion of missing values (metabolite1\_metabolite2)

0 0.1\_0.1 0.1\_0.3 0.1\_0.5 0.1\_0.7 0.3\_0.1 0.3\_0.3 0.3\_0.5 0.3\_0.7 0.5\_0.1 0.5\_0.3 0.5\_0.5 0.5\_0.7 0.7\_0.1 0.7\_0.3 0.7\_0.5 0.7\_0.7

**D** Bias cor

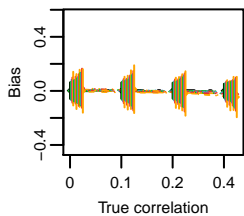

Bias pcor

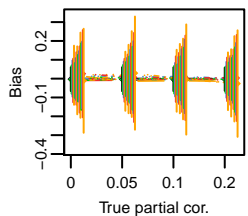

Bias Im phen ~ met

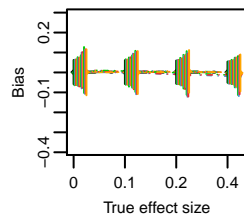

Bias Im met ~ phen

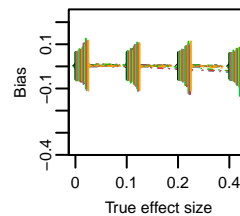

Bias logistic regr.

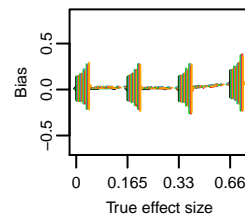

**E** Power cor

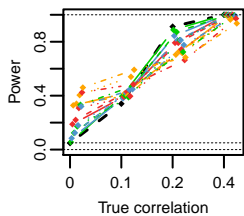

Power pcor

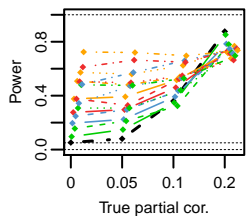

Power Im phen ~ met

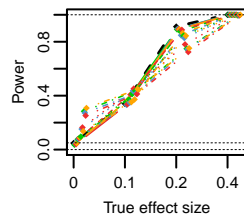

Power Im met ~ phen

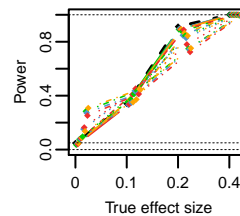

Power logistic regr.

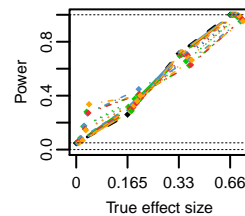

### A Metabolite 1

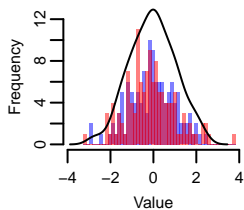

### Metabolite 2

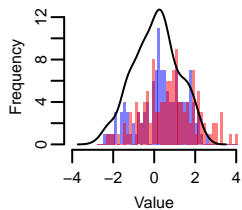

### B Scatter plot

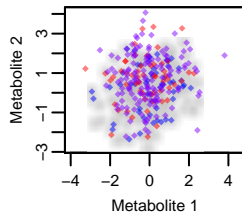

### C MSD (observed, imputed)

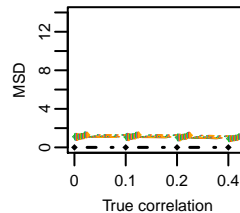

Histogram/data points

original observed imputed imputed in one metabolite only

Total proportion of missing values (metabolite1-metabolite2)

0 0.1\_0.1 0.3\_0.1 0.5\_0.1 0.7\_0.1  
 0.1\_0.3 0.3\_0.3 0.5\_0.3 0.7\_0.3  
 0.1\_0.5 0.3\_0.5 0.5\_0.5 0.7\_0.5  
 0.1\_0.7 0.3\_0.7 0.5\_0.7 0.7\_0.7

### D Bias cor

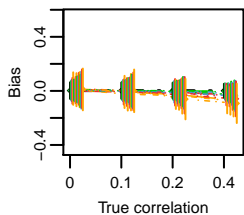

### Bias pcor

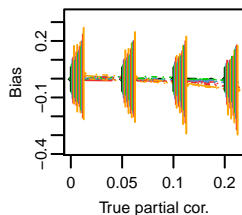

### Bias Im phen ~ met

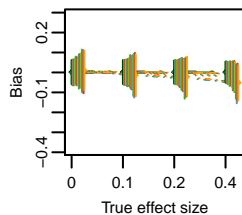

### Bias Im met ~ phen

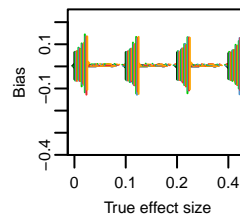

### Bias logistic regr.

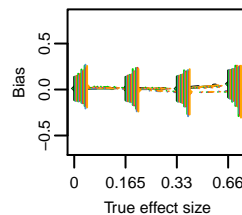

### E Power cor

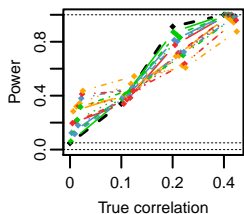

### Power pcor

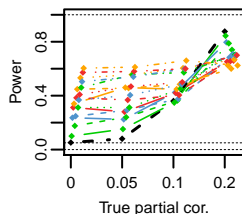

### Power Im phen ~ met

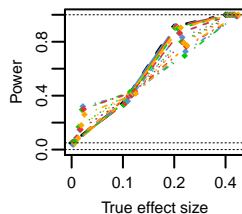

### Power Im met ~ phen

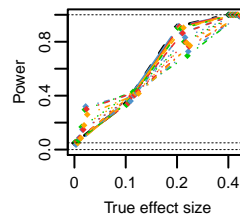

### Power logistic regr.

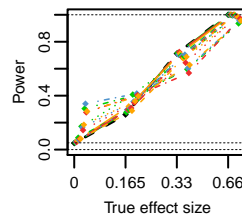

**A** Metabolite 1

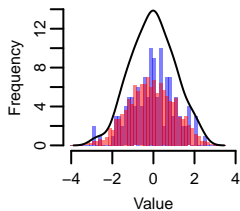

Metabolite 2

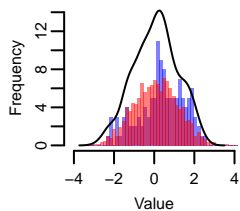

**B** Scatter plot

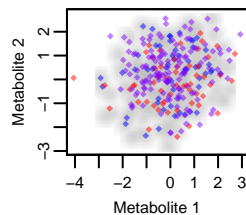

**C** MSD (observed, imputed)

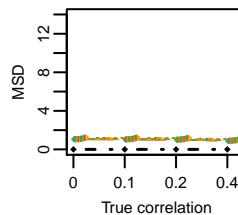

Histogram/data points

original observed imputed imputed in one metabolite only

Total proportion of missing values (metabolite1-metabolite2)

0 0.1\_0.1 0.3\_0.1 0.5\_0.1 0.7\_0.1  
 0.1\_0.3 0.3\_0.3 0.5\_0.3 0.7\_0.3  
 0.1\_0.5 0.3\_0.5 0.5\_0.5 0.7\_0.5  
 0.1\_0.7 0.3\_0.7 0.5\_0.7 0.7\_0.7

**D** Bias cor

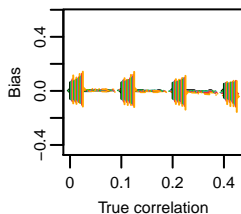

Bias pcor

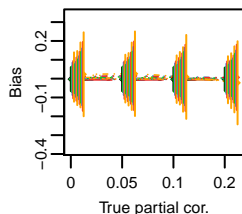

Bias Im phen ~ met

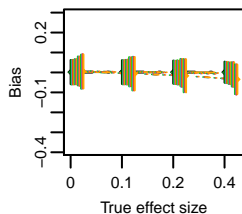

Bias Im met ~ phen

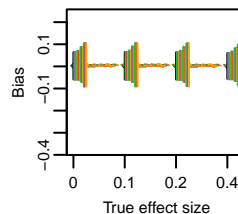

Bias logistic regr.

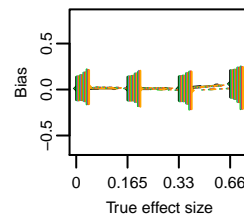

**E** Power cor

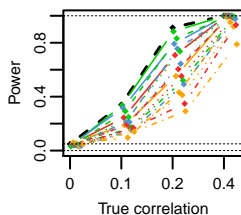

Power pcor

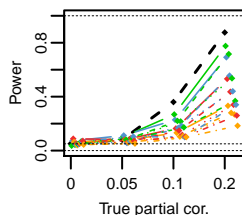

Power Im phen ~ met

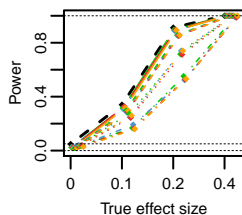

Power Im met ~ phen

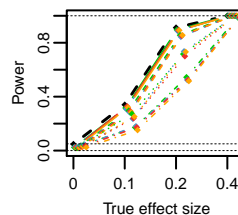

Power logistic regr.

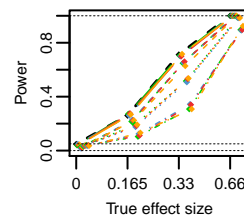

**A** Metabolite 1

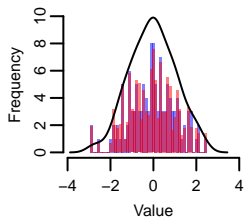

Metabolite 2

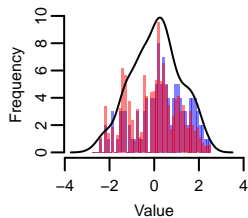

**B** Scatter plot

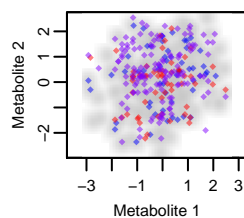

**C** MSD (observed, imputed)

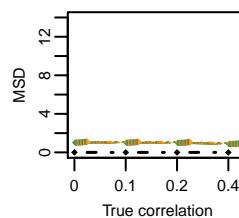

Histogram/data points

original observed imputed imputed in one metabolite only

Total proportion of missing values (metabolite1-metabolite2)

0 0.1\_0.1 0.1\_0.3 0.1\_0.5 0.1\_0.7 0.3\_0.1 0.3\_0.3 0.3\_0.5 0.3\_0.7 0.5\_0.1 0.5\_0.3 0.5\_0.5 0.5\_0.7 0.7\_0.1 0.7\_0.3 0.7\_0.5 0.7\_0.7

**D** Bias cor

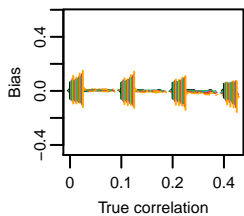

Bias pcor

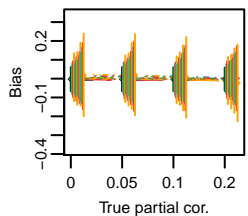

Bias Im phen ~ met

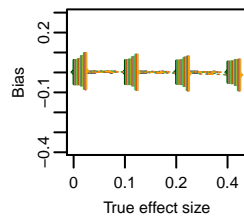

Bias Im met ~ phen

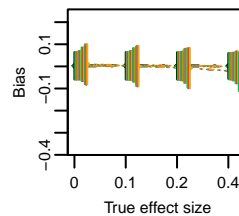

Bias logistic regr.

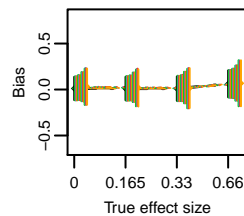

**E** Power cor

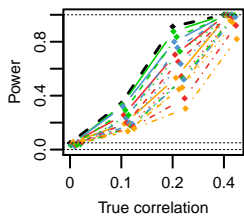

Power pcor

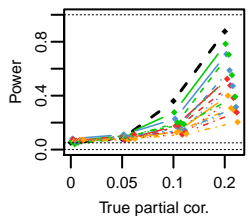

Power Im phen ~ met

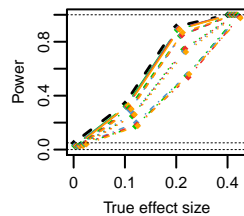

Power Im met ~ phen

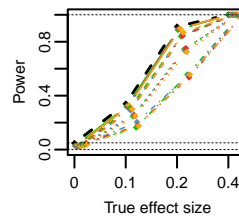

Power logistic regr.

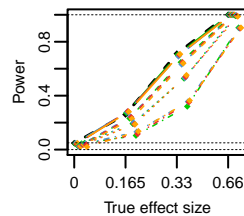

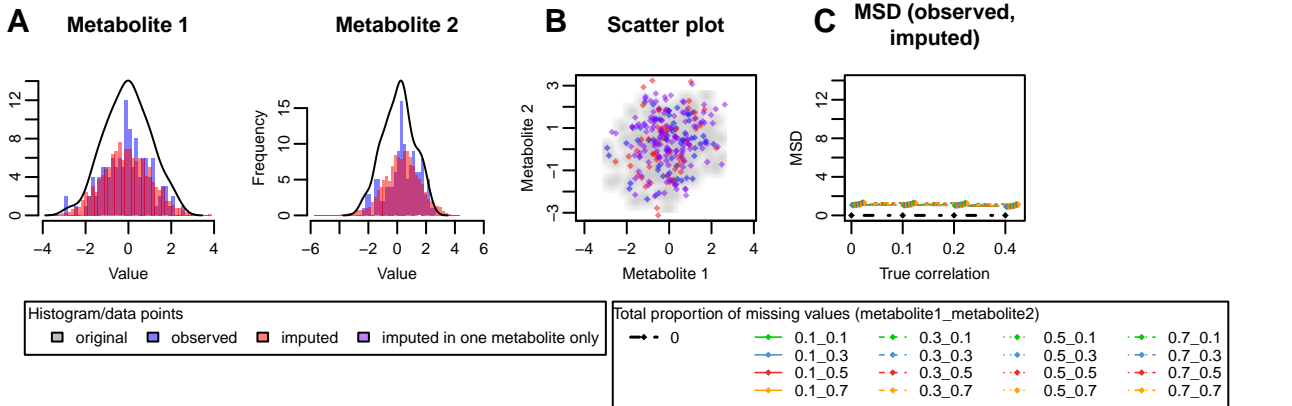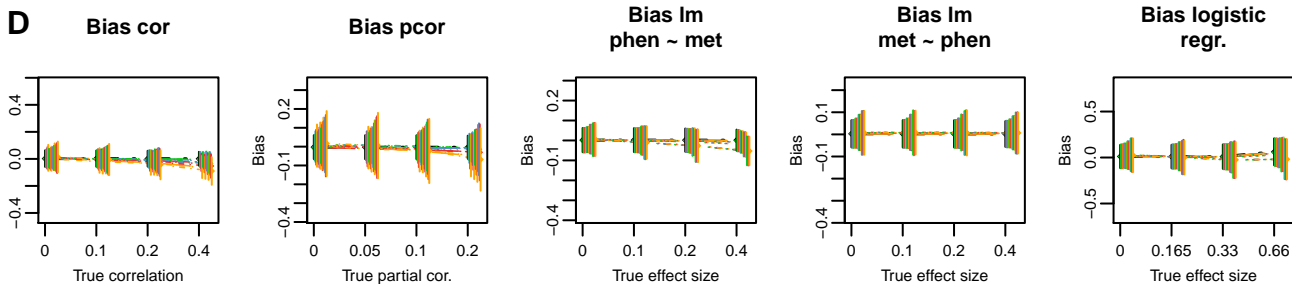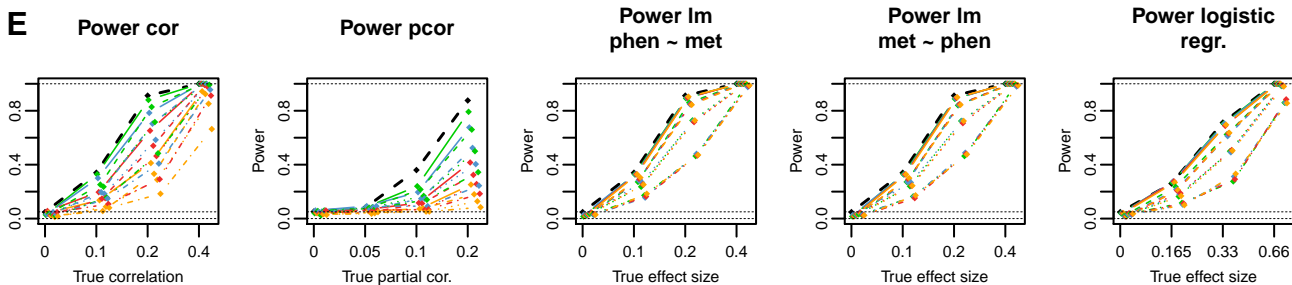

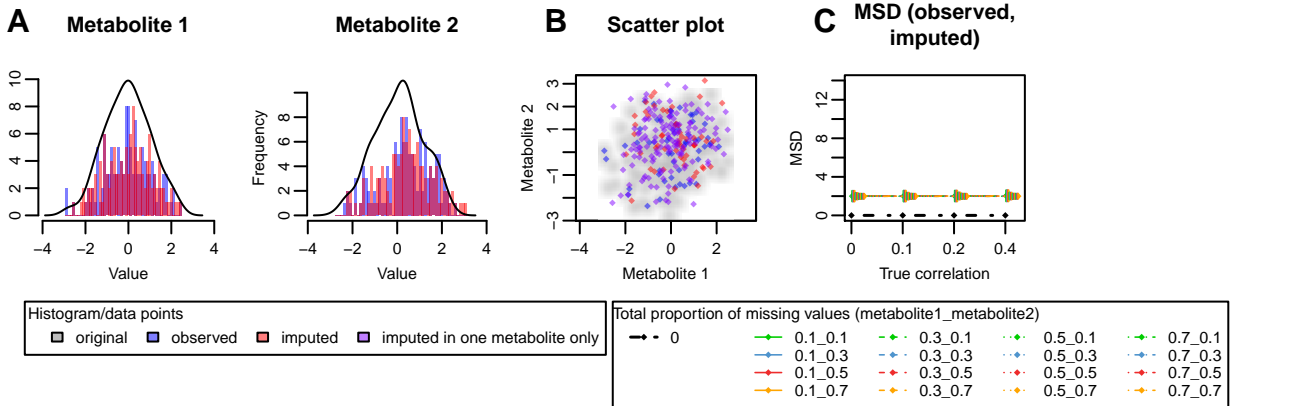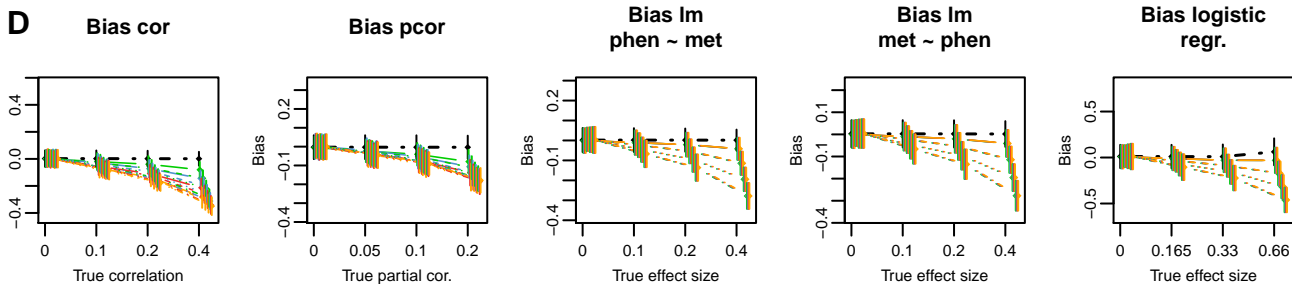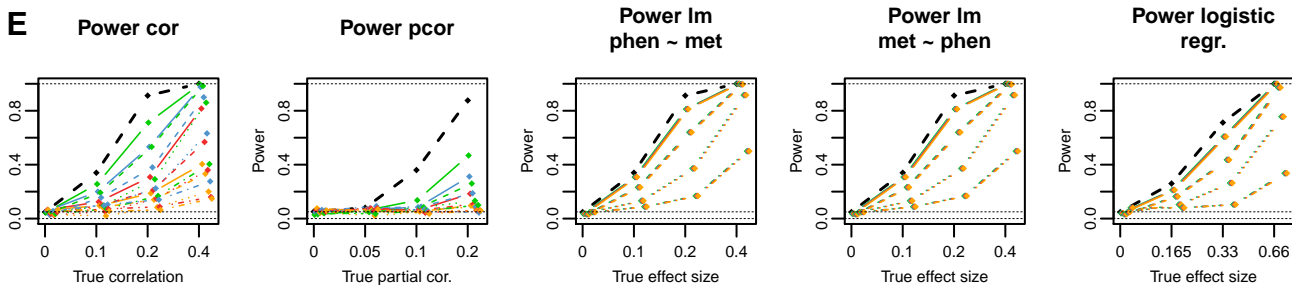

### A Metabolite 1

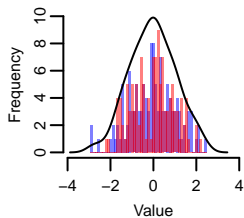

### Metabolite 2

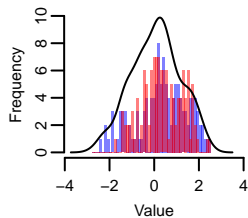

### B Scatter plot

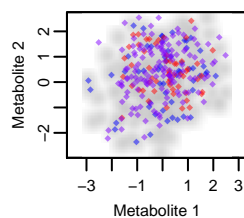

### C MSD (observed, imputed)

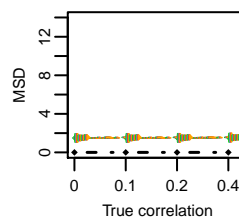

Histogram/data points

original observed imputed imputed in one metabolite only

Total proportion of missing values (metabolite1-metabolite2)

0 0.1\_0.1 0.1\_0.3 0.1\_0.5 0.1\_0.7 0.3\_0.1 0.3\_0.3 0.3\_0.5 0.3\_0.7 0.5\_0.1 0.5\_0.3 0.5\_0.5 0.5\_0.7 0.7\_0.1 0.7\_0.3 0.7\_0.5 0.7\_0.7

### D Bias cor

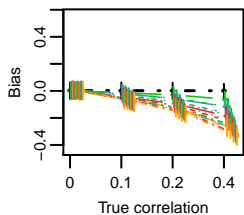

### Bias pcor

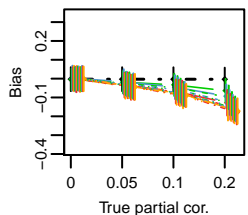

### Bias Im phen ~ met

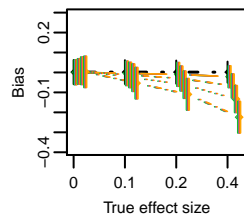

### Bias Im met ~ phen

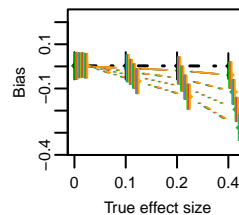

### Bias logistic regr.

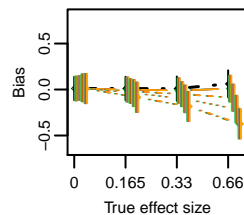

### E Power cor

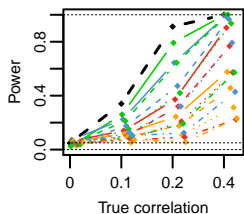

### Power pcor

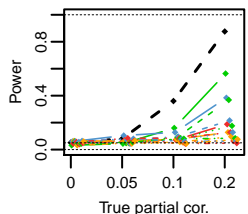

### Power Im phen ~ met

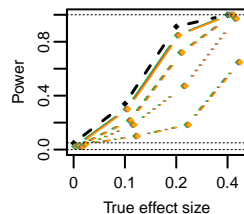

### Power Im met ~ phen

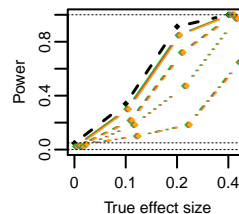

### Power logistic regr.

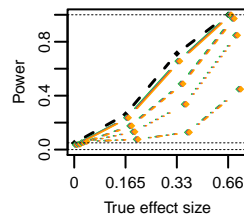



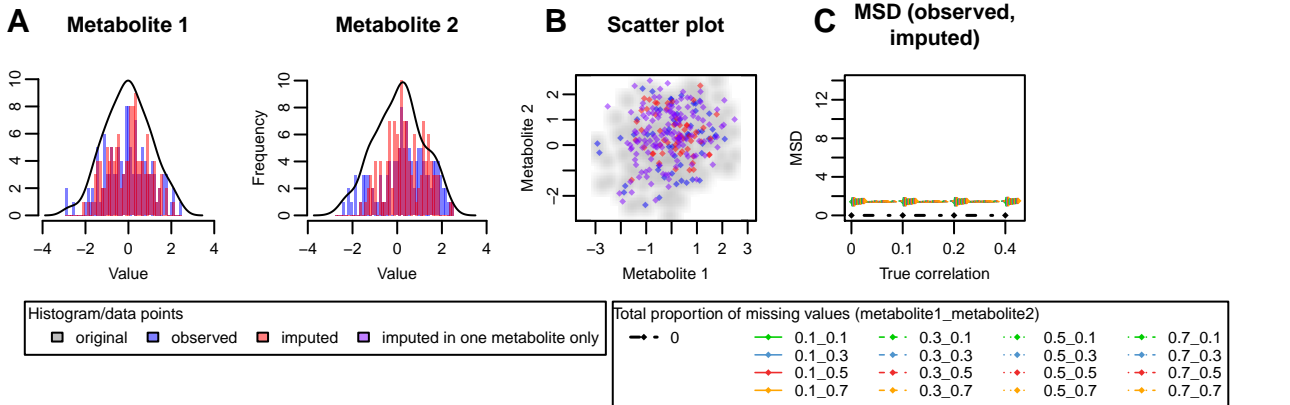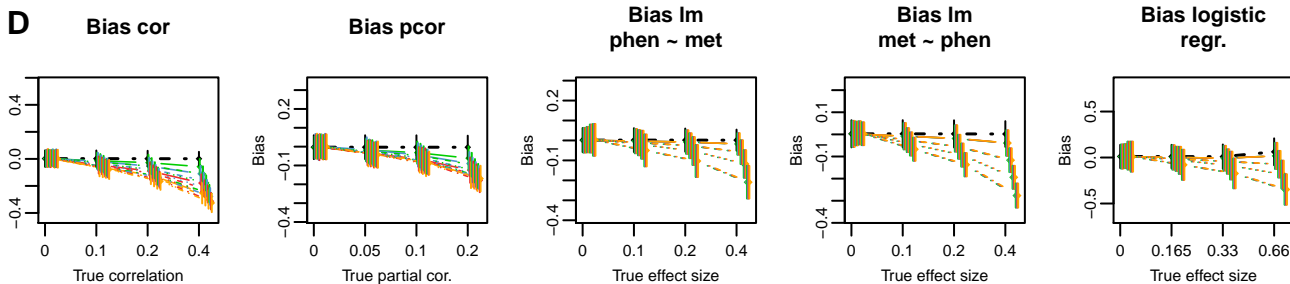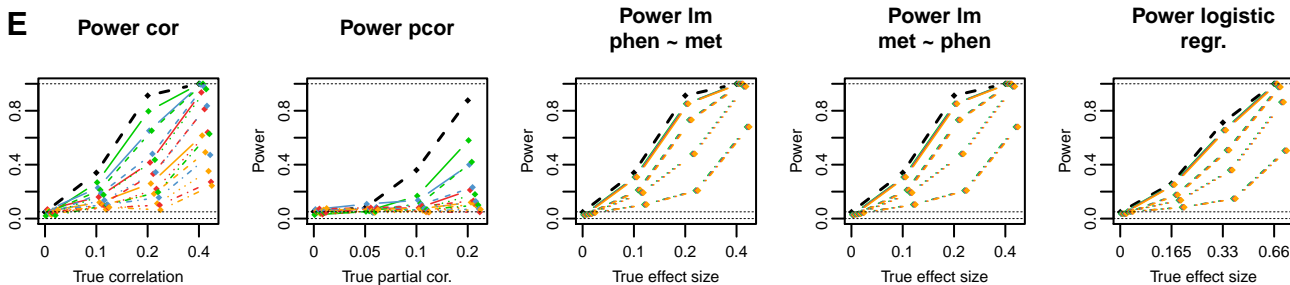

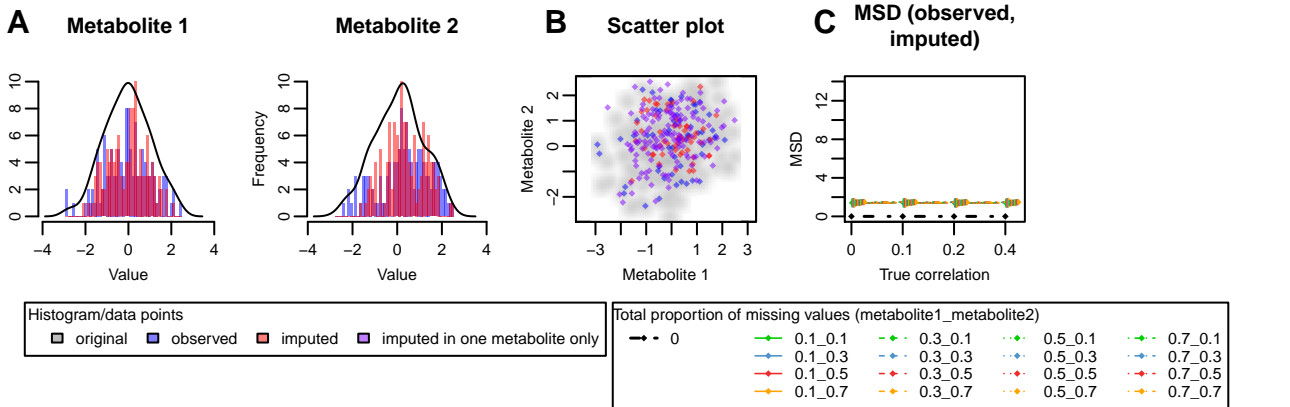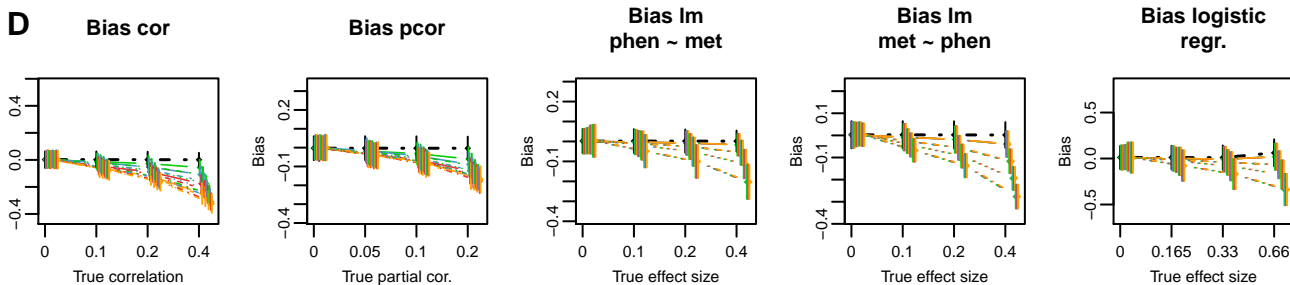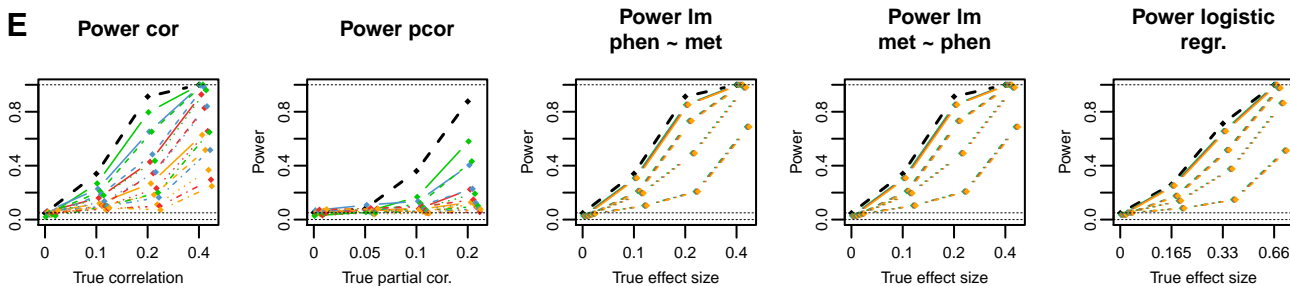

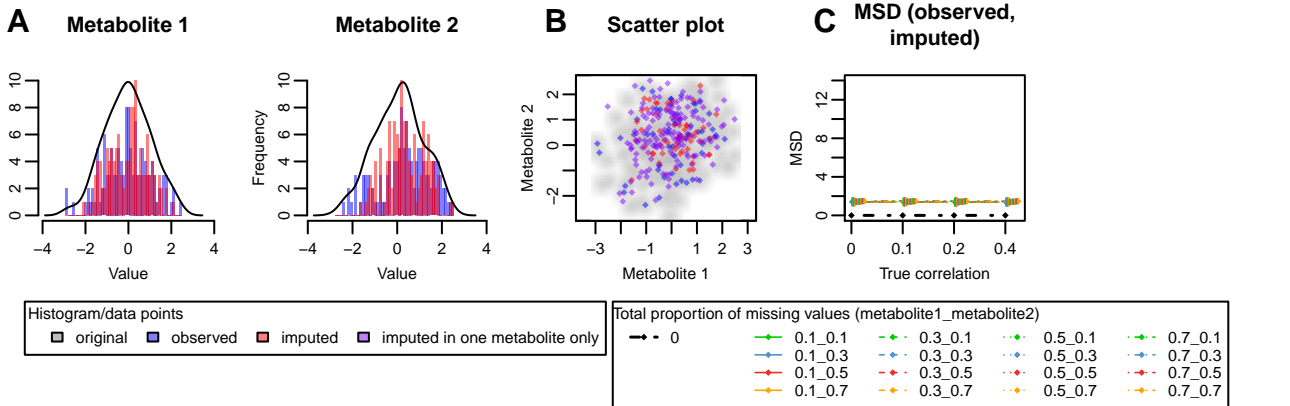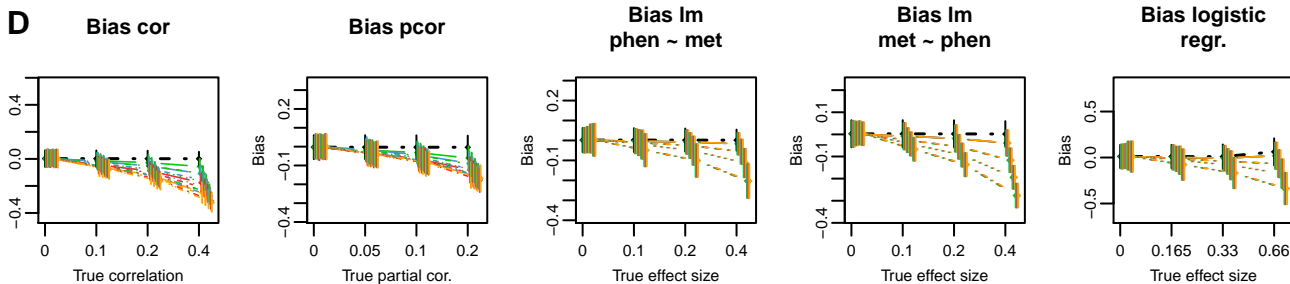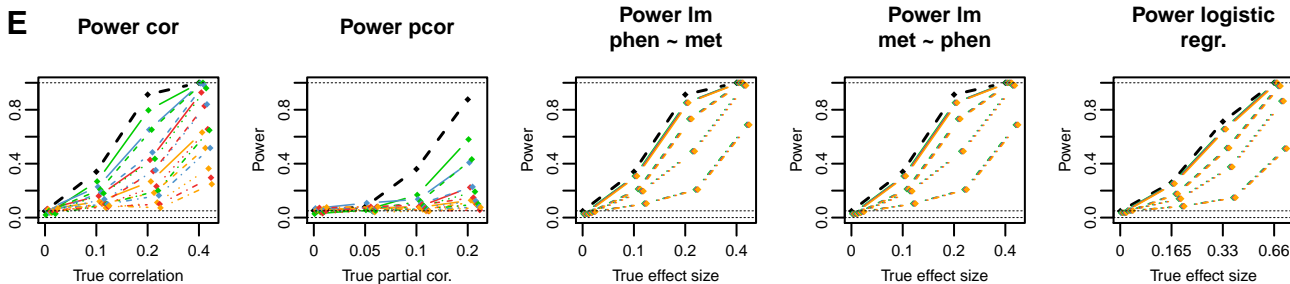

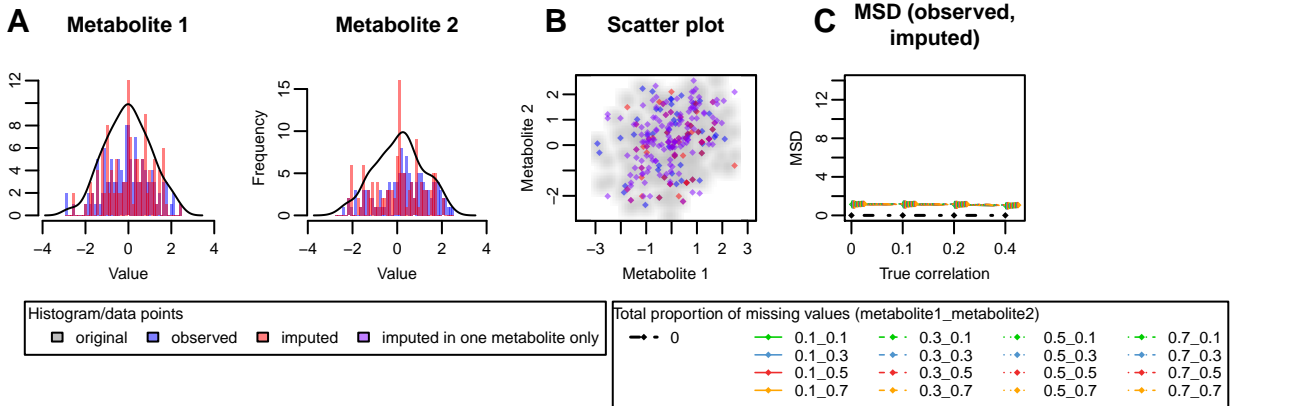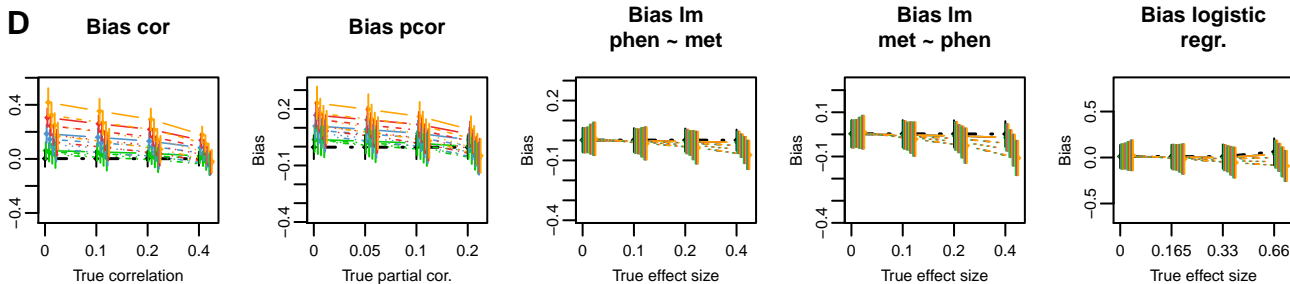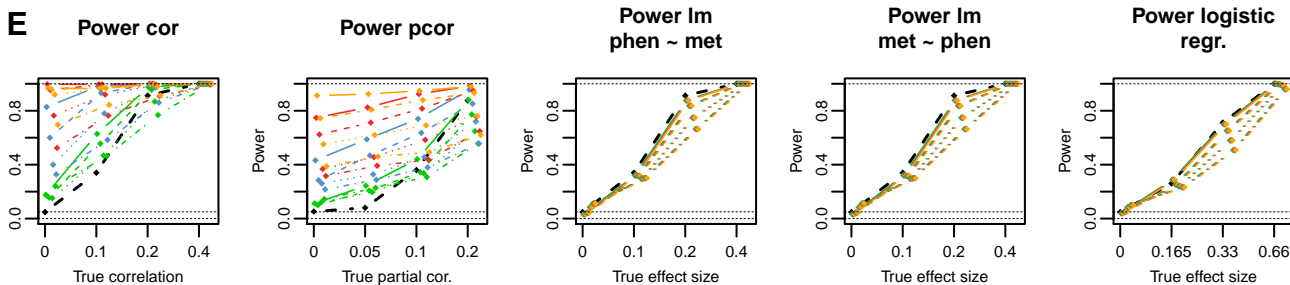

**A** Metabolite 1

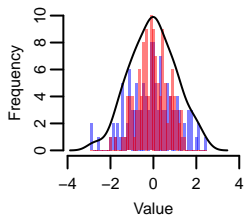

Metabolite 2

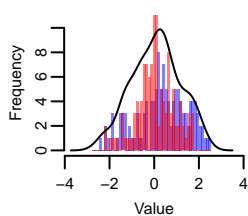

**B** Scatter plot

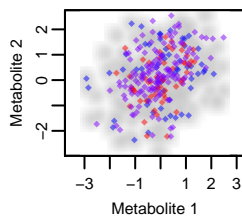

**C** MSD (observed, imputed)

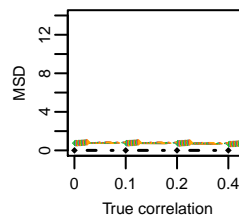

Histogram/data points

original observed imputed imputed in one metabolite only

Total proportion of missing values (metabolite1-metabolite2)

- - 0  
 0.1\_0.1 0.1\_0.3 0.1\_0.5 0.1\_0.7  
 0.3\_0.1 0.3\_0.3 0.3\_0.5 0.3\_0.7  
 0.5\_0.1 0.5\_0.3 0.5\_0.5 0.5\_0.7  
 0.7\_0.1 0.7\_0.3 0.7\_0.5 0.7\_0.7

**D** Bias cor

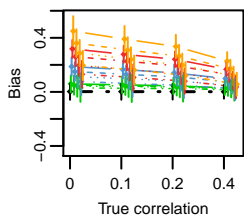

Bias pcor

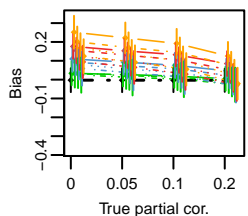

Bias Im phen ~ met

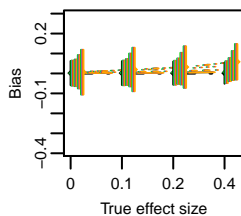

Bias Im met ~ phen

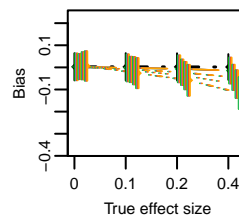

Bias logistic regr.

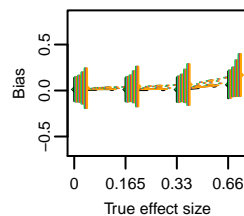

**E** Power cor

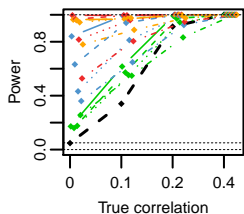

Power pcor

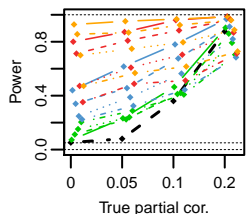

Power Im phen ~ met

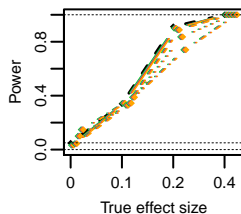

Power Im met ~ phen

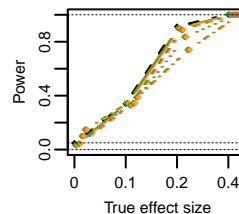

Power logistic regr.

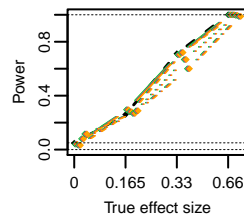

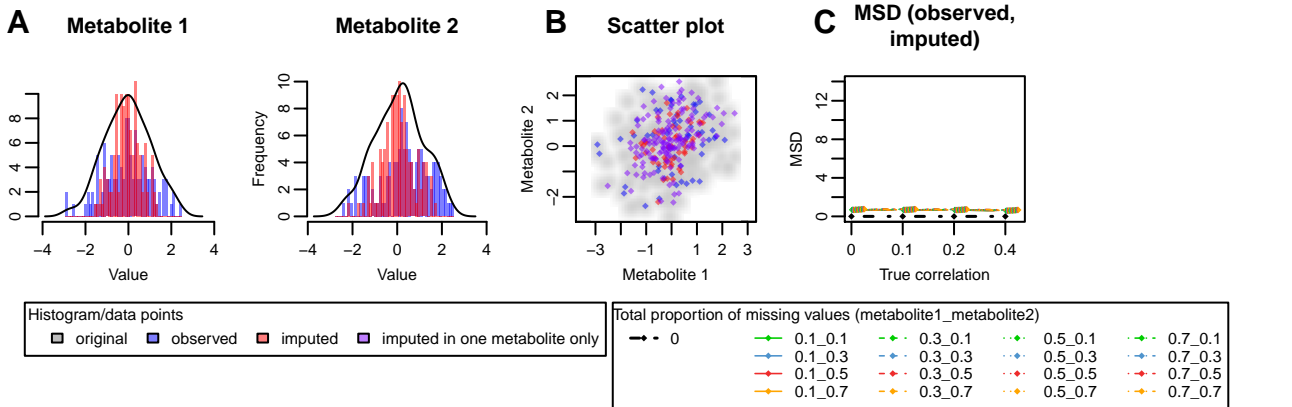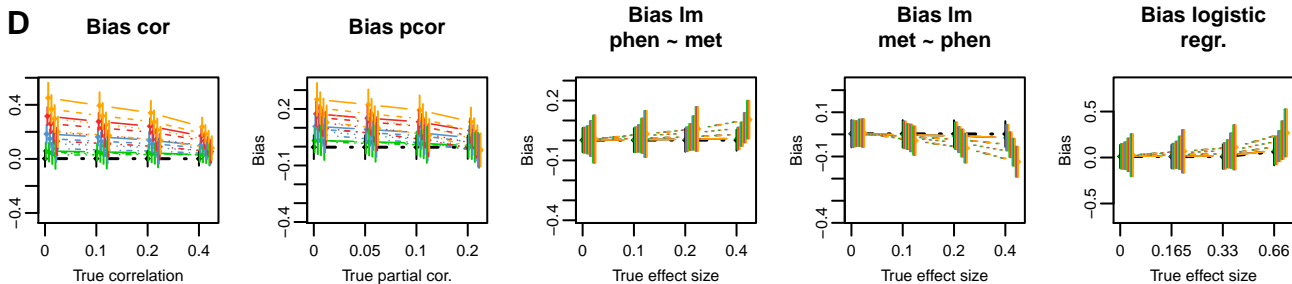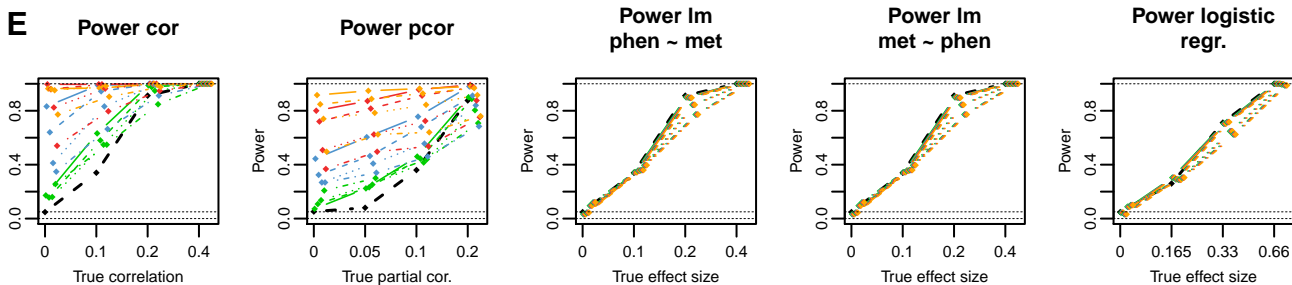

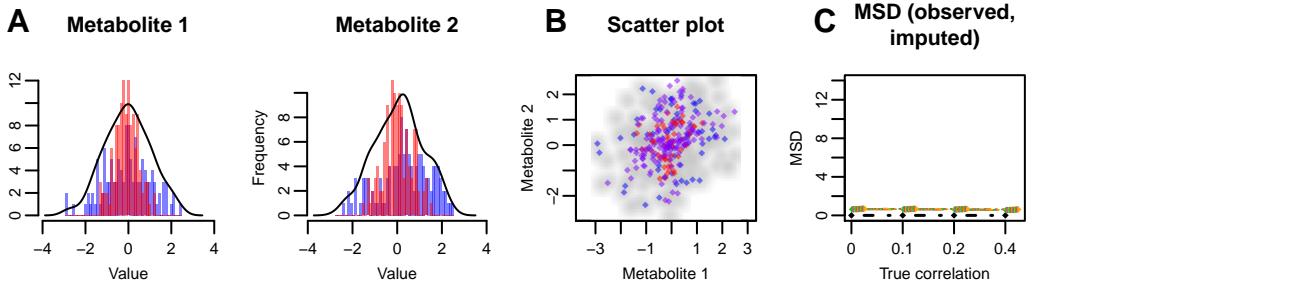

Histogram/data points

- original
- observed
- imputed
- imputed in one metabolite only

Total proportion of missing values (metabolite1-metabolite2)

- 0
- 0.1\_0.1
- 0.1\_0.3
- 0.1\_0.5
- 0.1\_0.7
- 0.3\_0.1
- 0.3\_0.3
- 0.3\_0.5
- 0.3\_0.7
- 0.5\_0.1
- 0.5\_0.3
- 0.5\_0.5
- 0.5\_0.7
- 0.7\_0.1
- 0.7\_0.3
- 0.7\_0.5
- 0.7\_0.7

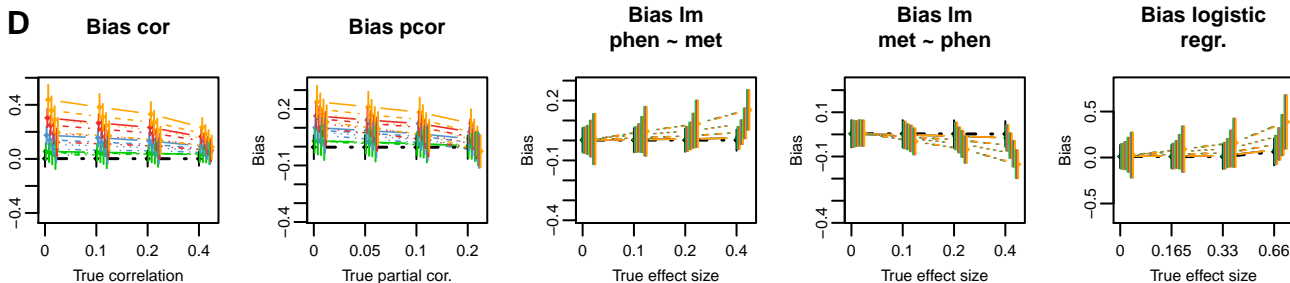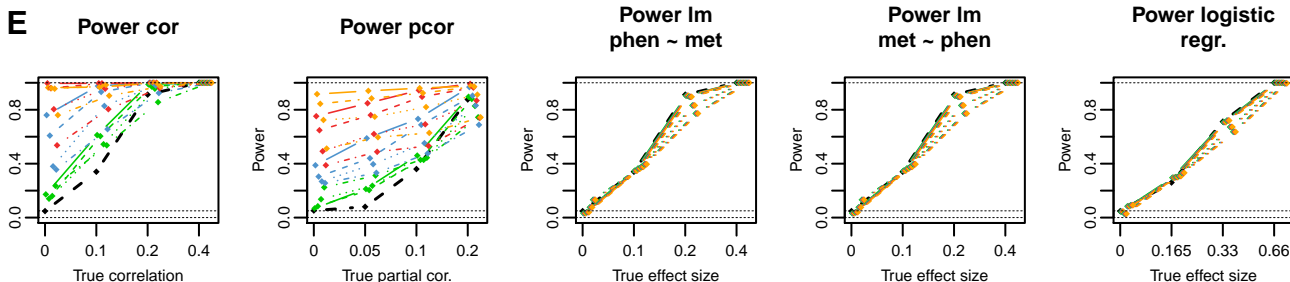

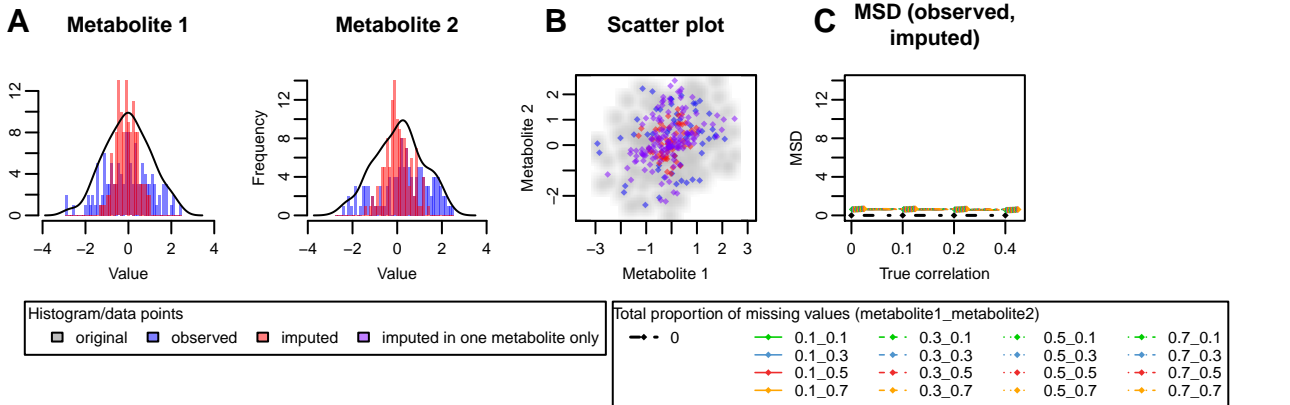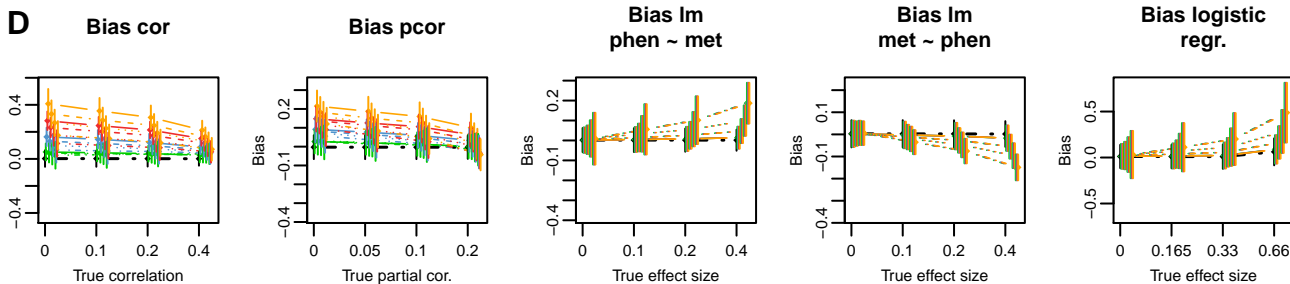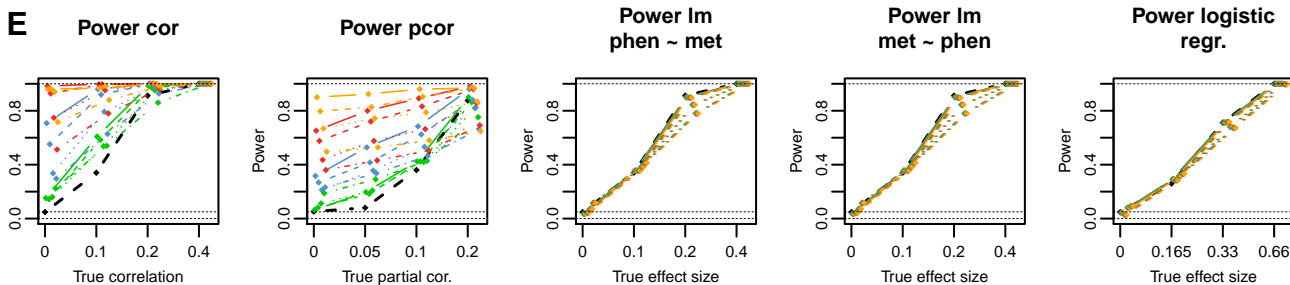



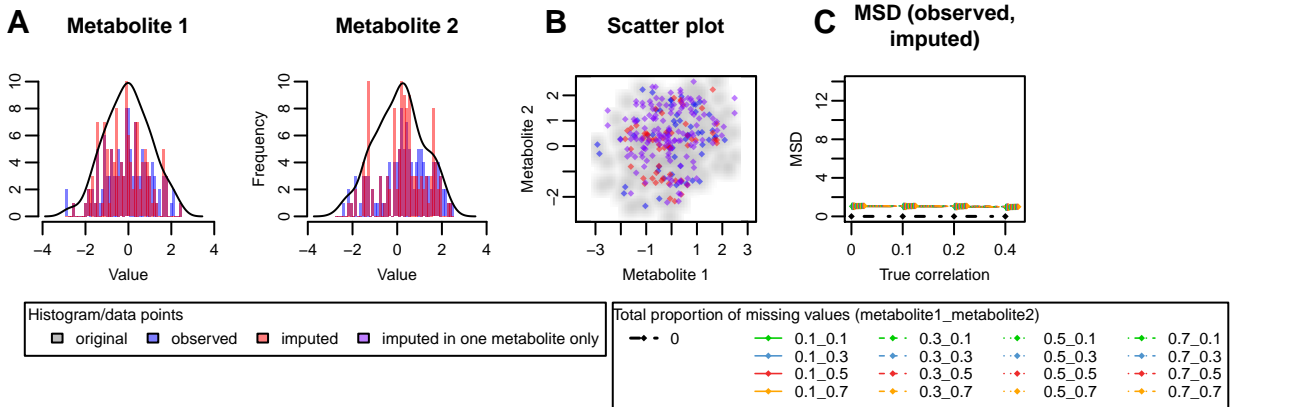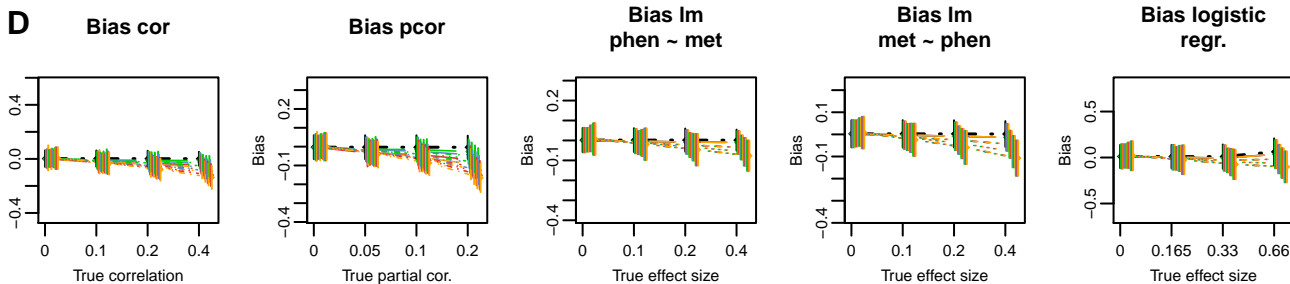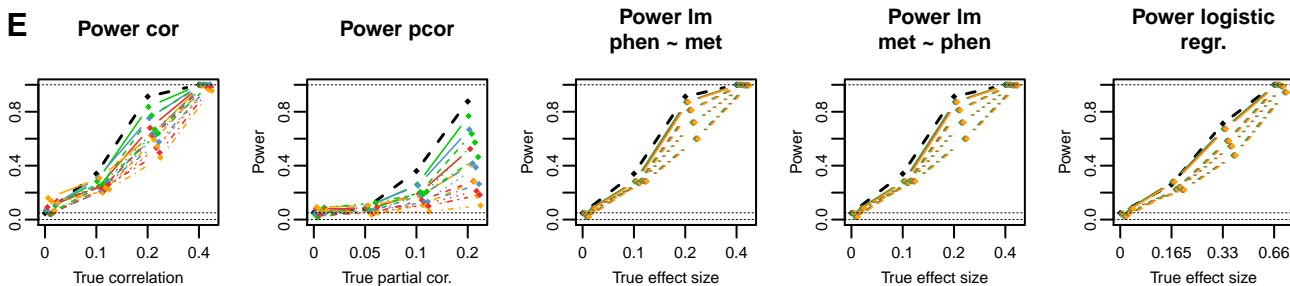

**A** Metabolite 1

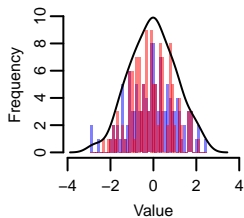

Metabolite 2

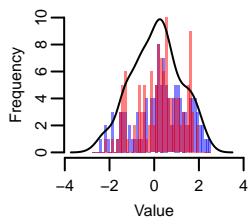

**B** Scatter plot

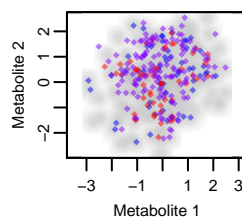

**C** MSD (observed, imputed)

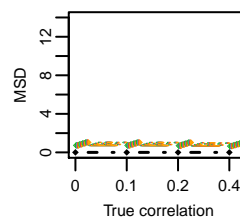

Histogram/data points

original observed imputed imputed in one metabolite only

Total proportion of missing values (metabolite1-metabolite2)

- - 0  
 0.1\_0.1 0.1\_0.3 0.1\_0.5 0.1\_0.7  
 0.3\_0.1 0.3\_0.3 0.3\_0.5 0.3\_0.7  
 0.5\_0.1 0.5\_0.3 0.5\_0.5 0.5\_0.7  
 0.7\_0.1 0.7\_0.3 0.7\_0.5 0.7\_0.7

**D** Bias cor

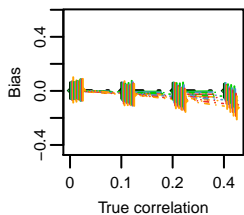

Bias pcor

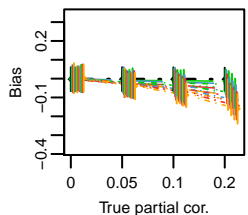

Bias Im phen ~ met

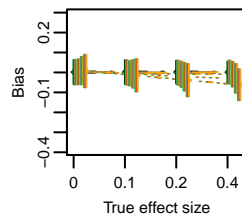

Bias Im met ~ phen

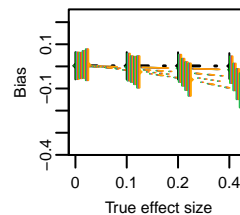

Bias logistic regr.

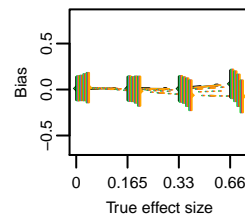

**E** Power cor

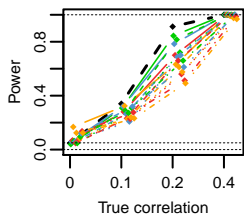

Power pcor

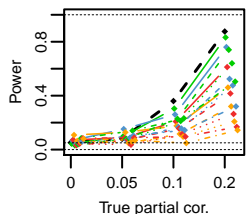

Power Im phen ~ met

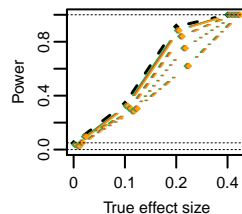

Power Im met ~ phen

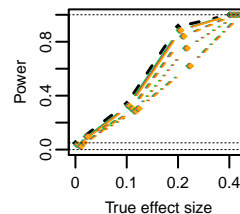

Power logistic regr.

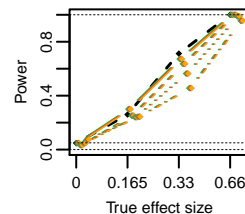

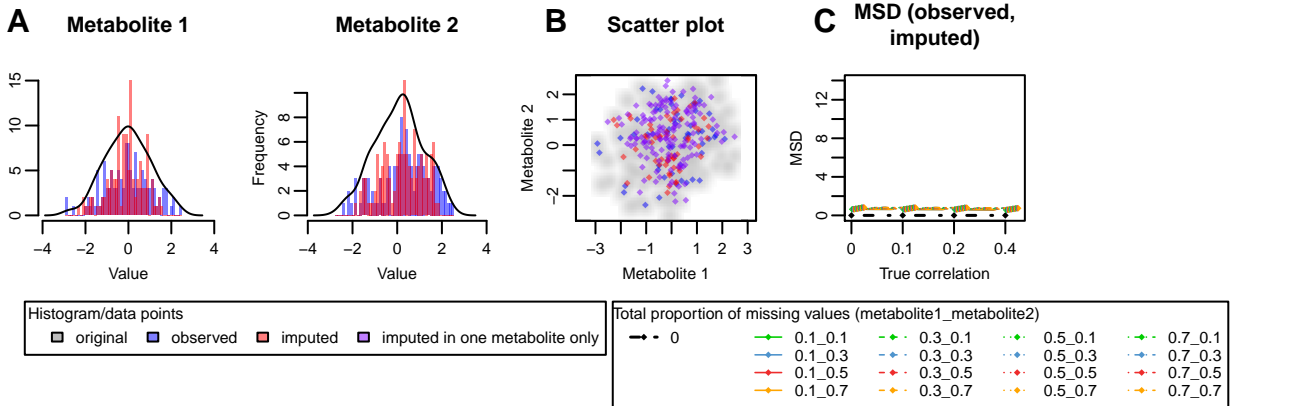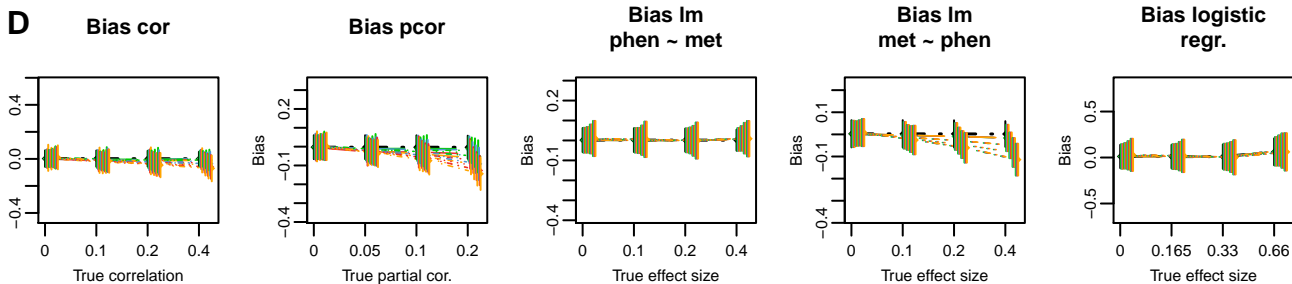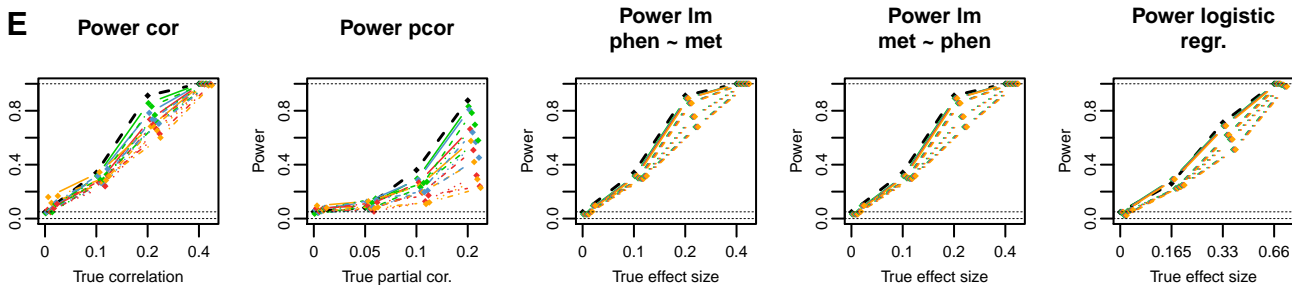

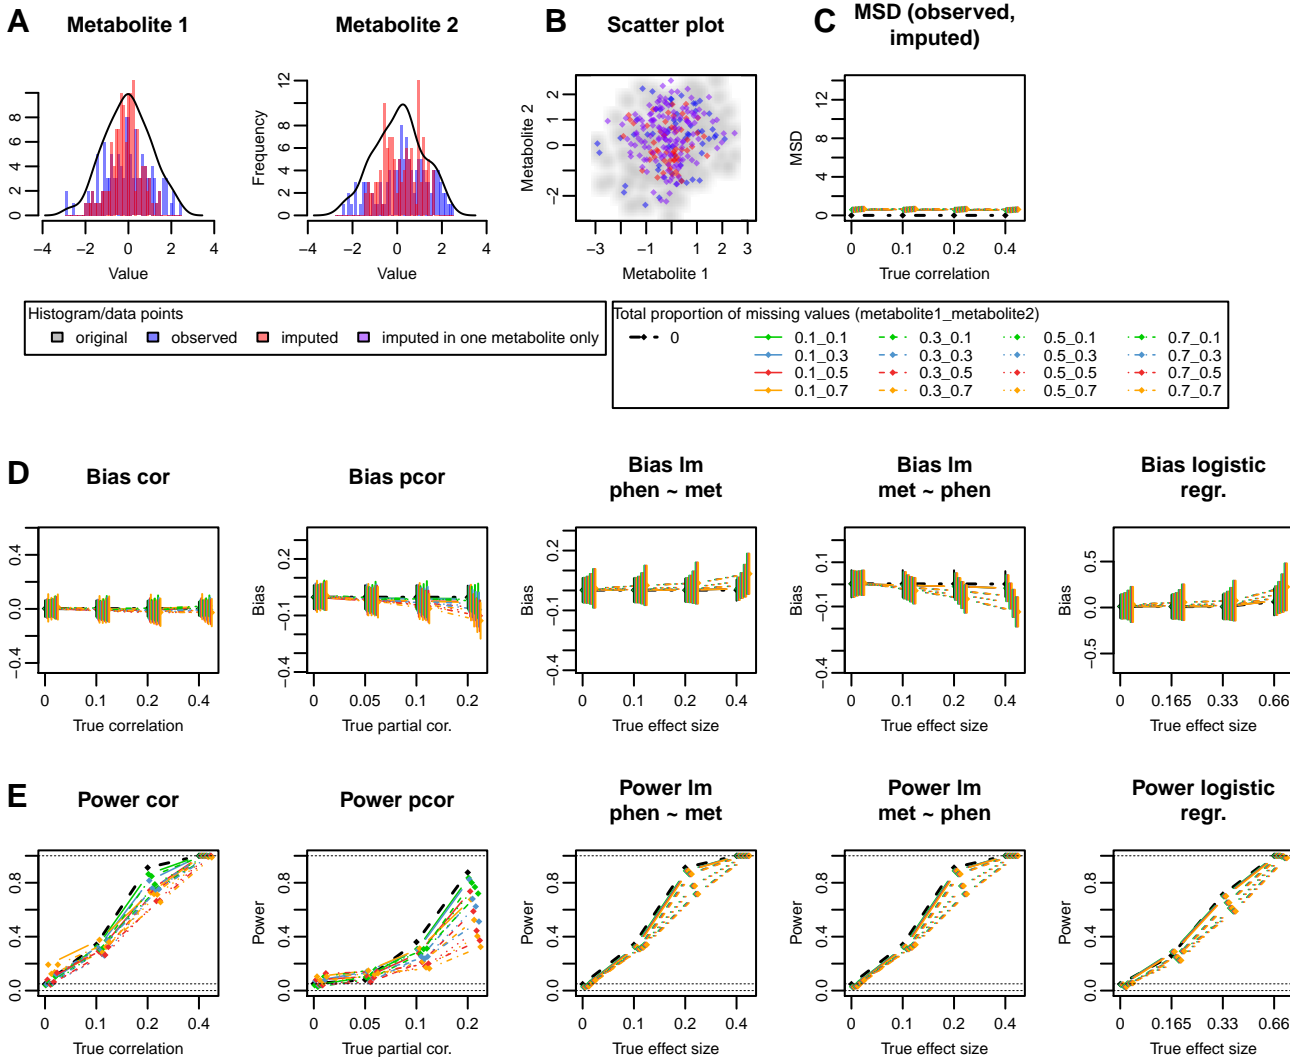

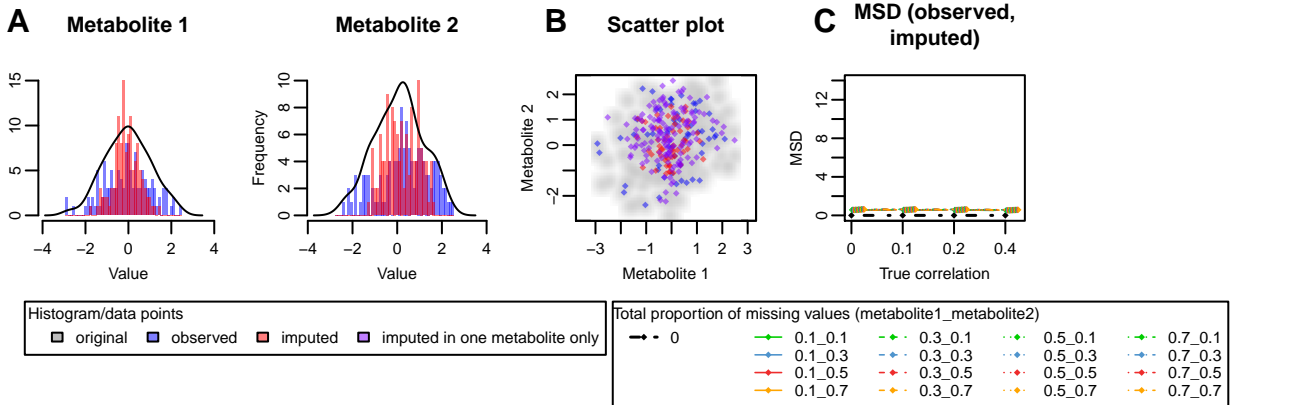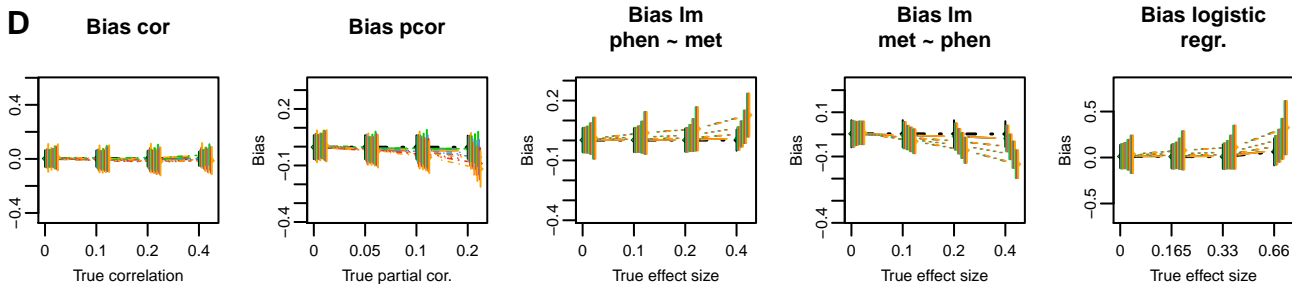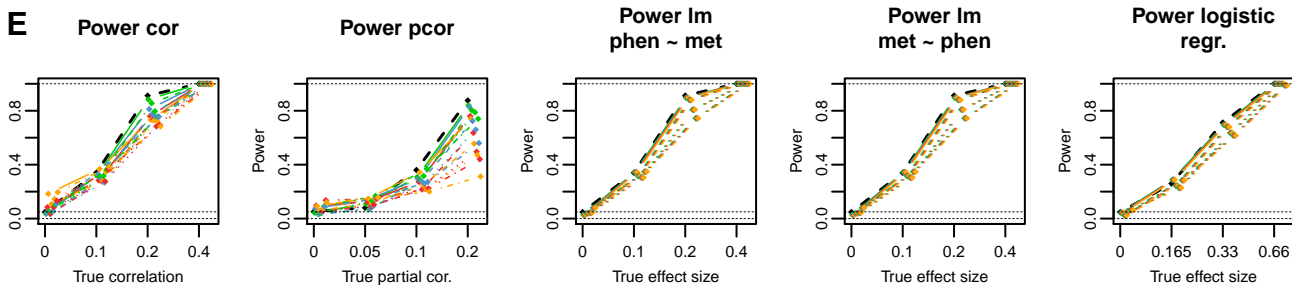

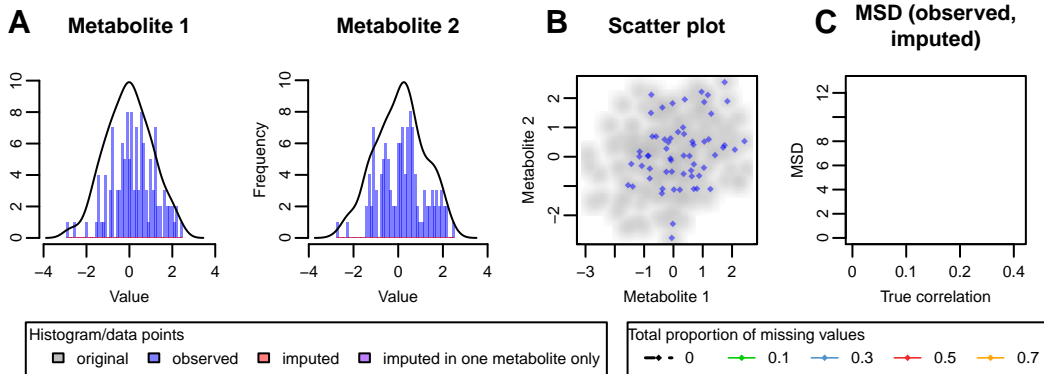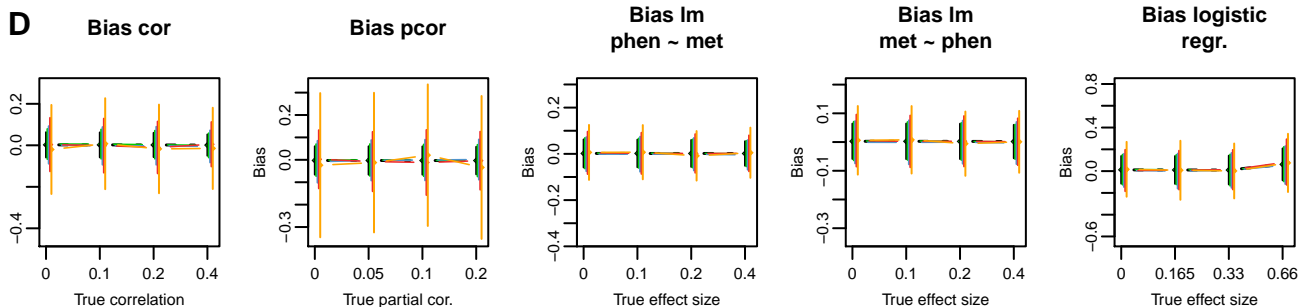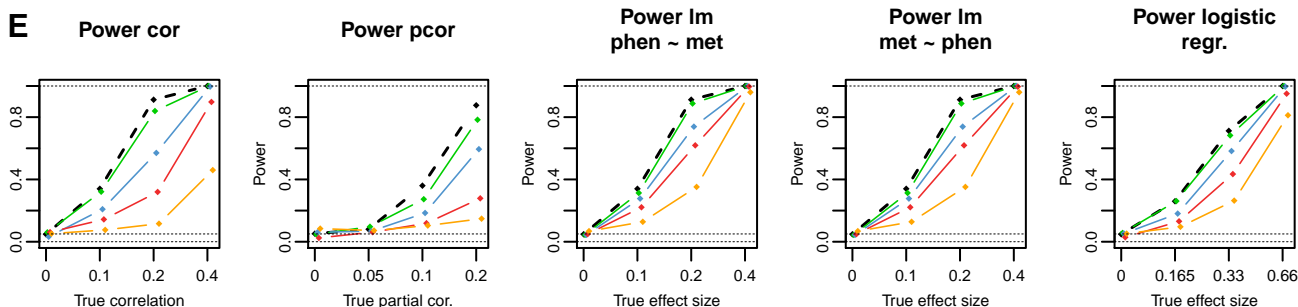

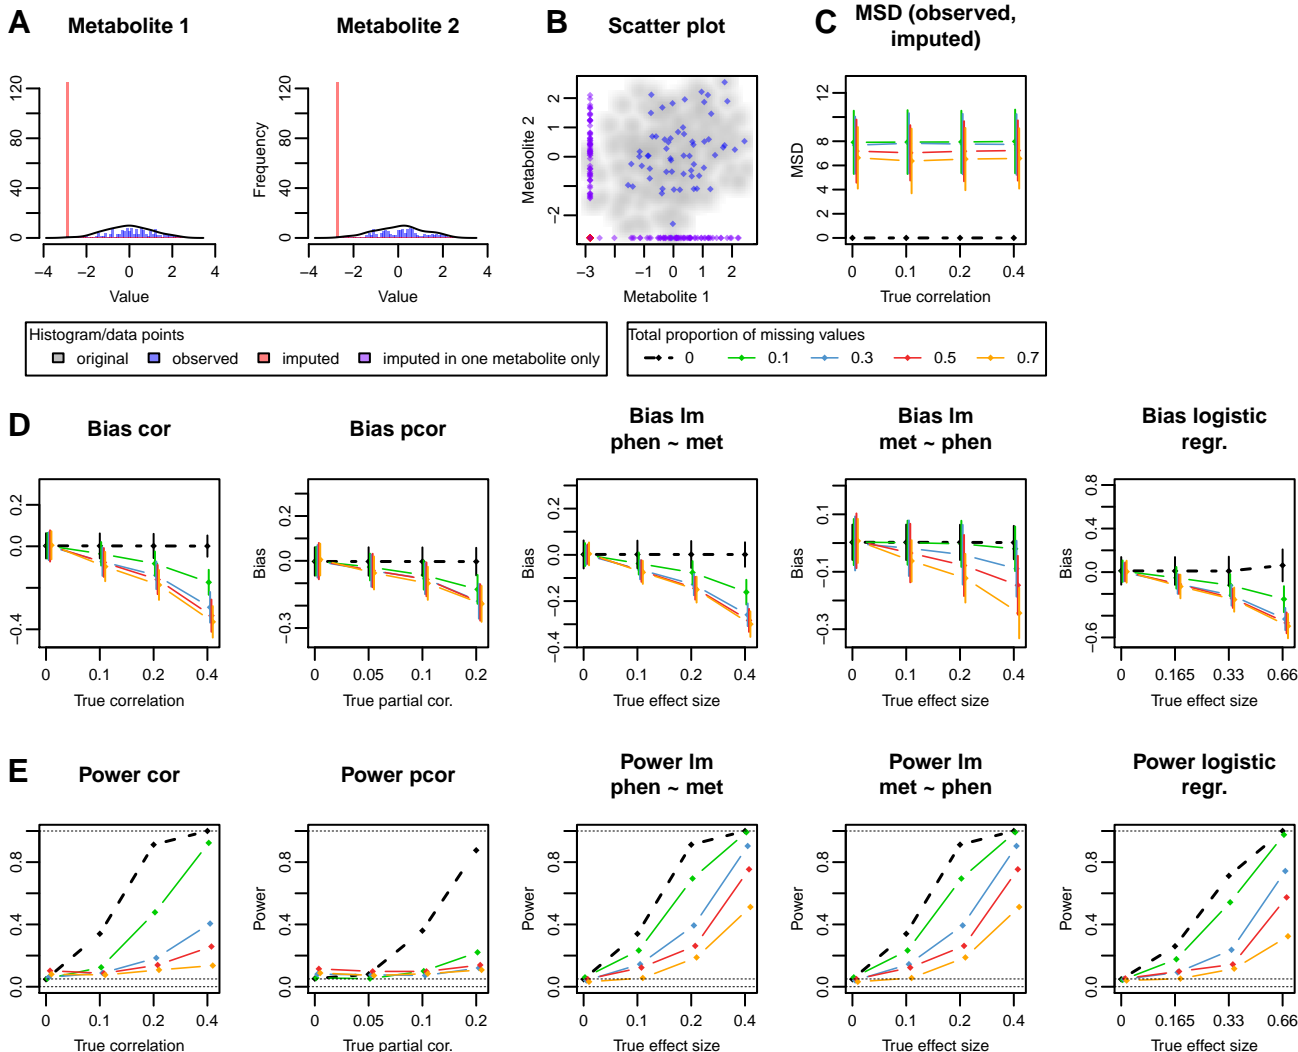

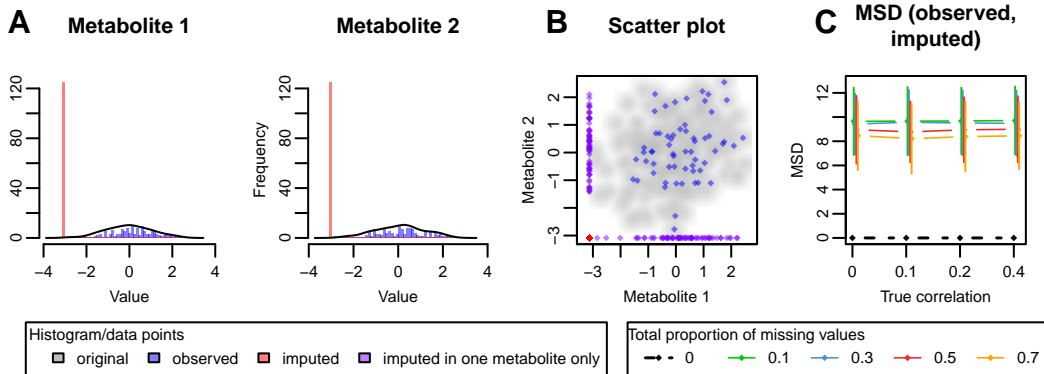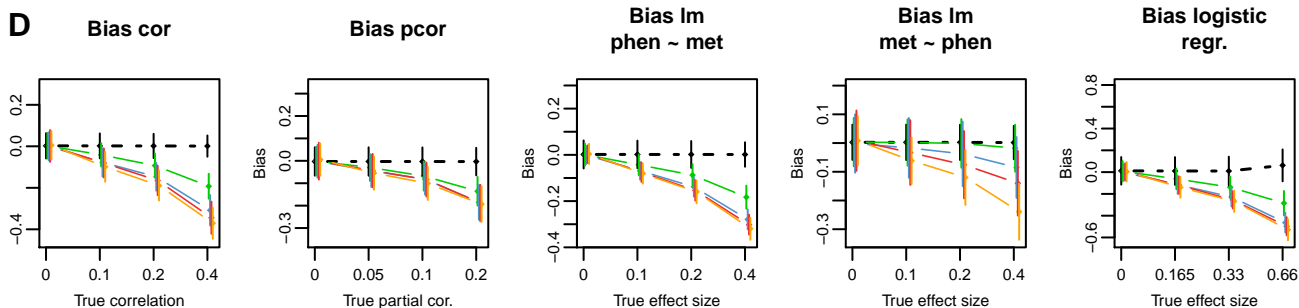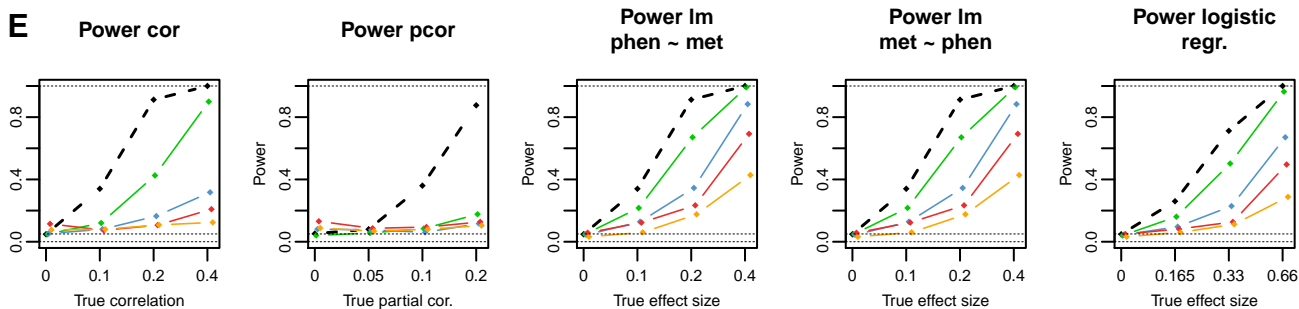



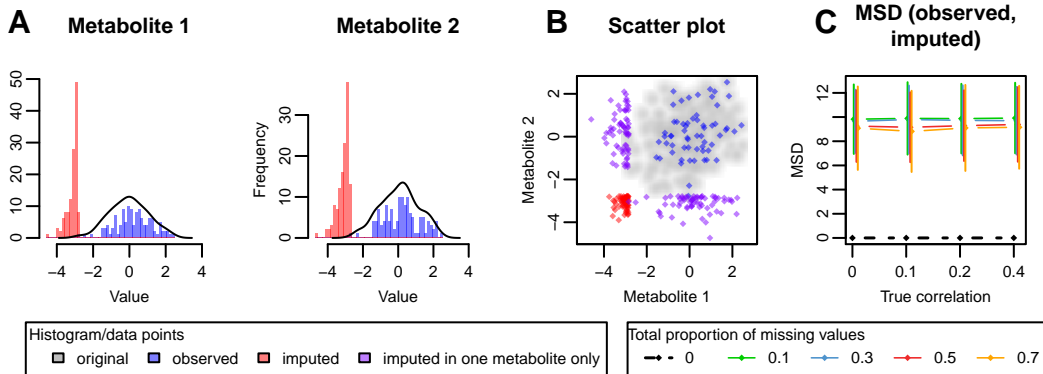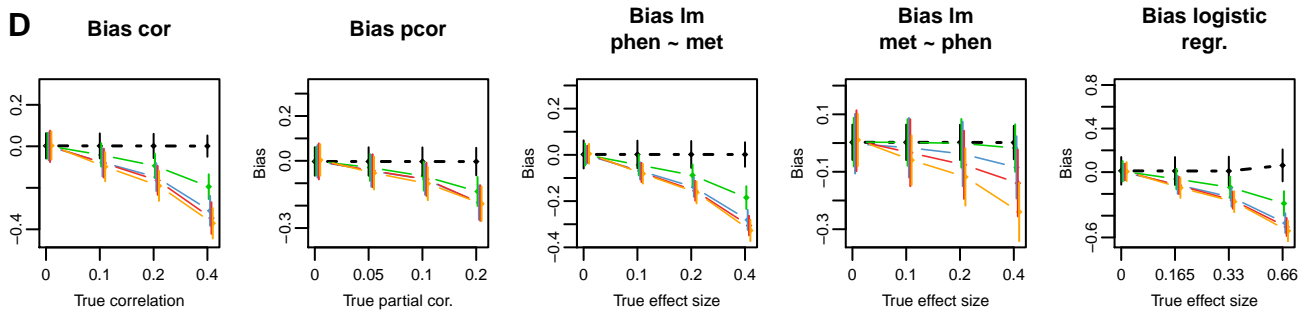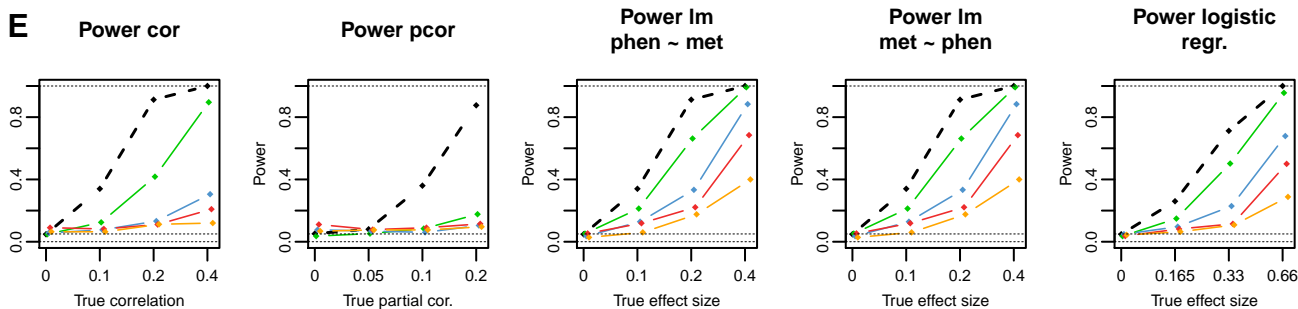

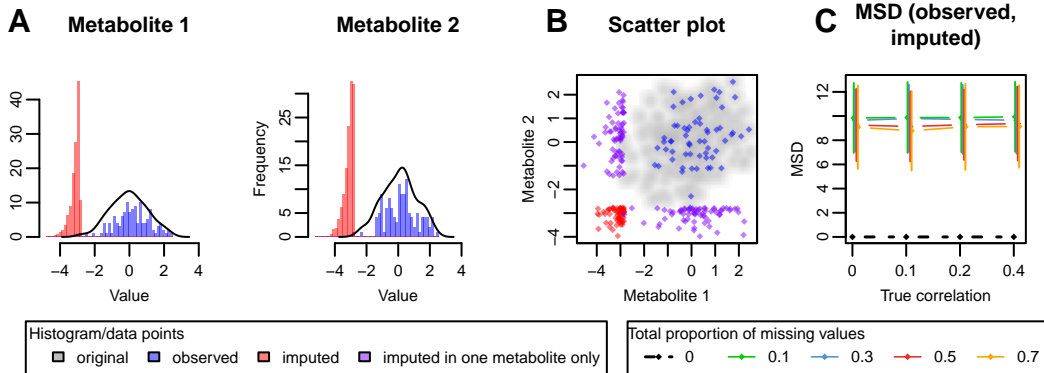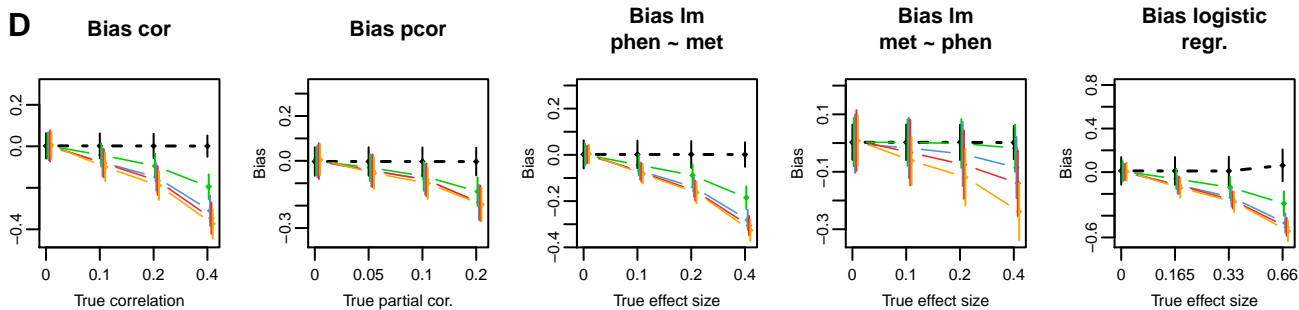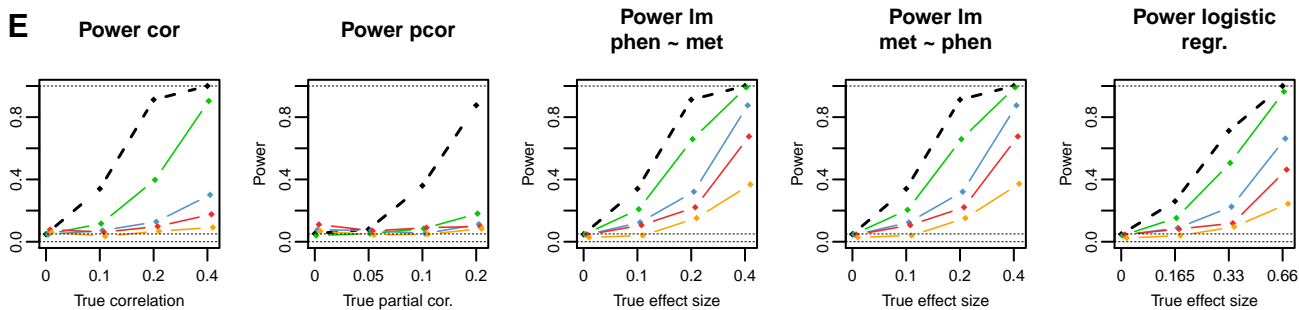

**A** Metabolite 1

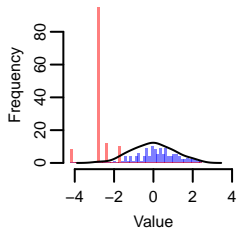

Metabolite 2

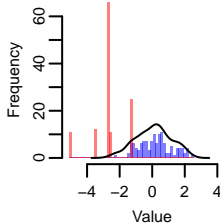

**B** Scatter plot

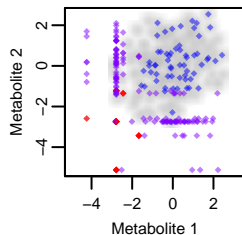

**C** MSD (observed, imputed)

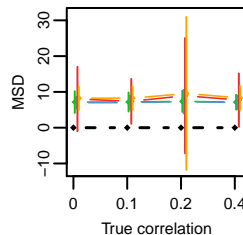

Histogram/data points  
 ■ original ■ observed ■ imputed ■ imputed in one metabolite only

Total proportion of missing values  
 - - 0 — 0.1 — 0.3 — 0.5 — 0.7

**D** Bias cor

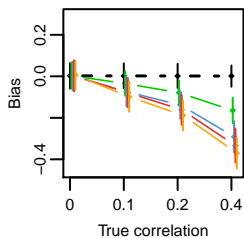

Bias pcor

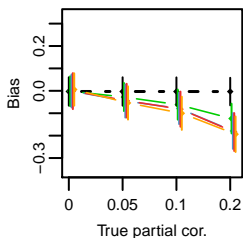

Bias lm phen ~ met

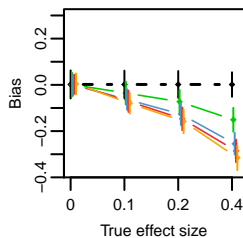

Bias lm met ~ phen

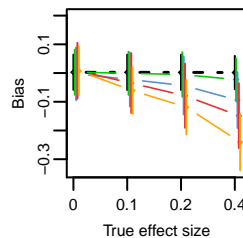

Bias logistic regr.

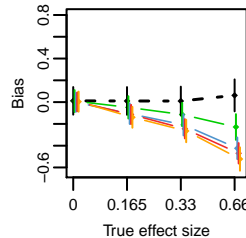

**E** Power cor

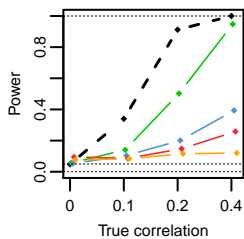

Power pcor

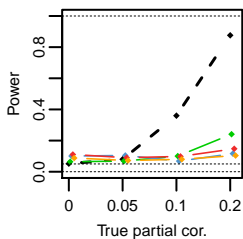

Power lm phen ~ met

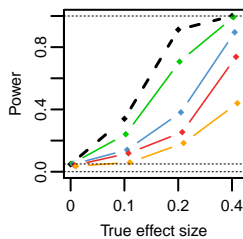

Power lm met ~ phen

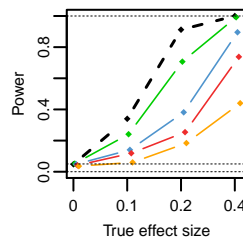

Power logistic regr.

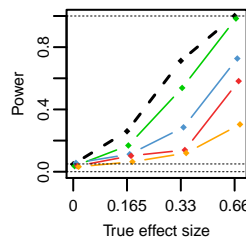

**A** Metabolite 1

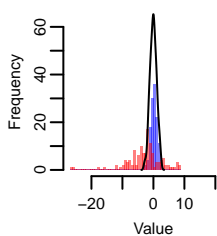

Metabolite 2

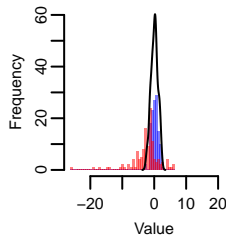

**B** Scatter plot

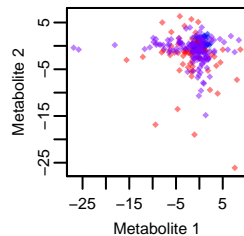

**C** MSD (observed, imputed)

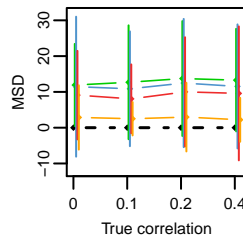

Histogram/data points  
 ■ original ■ observed ■ imputed ■ imputed in one metabolite only

Total proportion of missing values  
 - - 0 - - 0.1 - - 0.3 - - 0.5 - - 0.7

**D** Bias cor

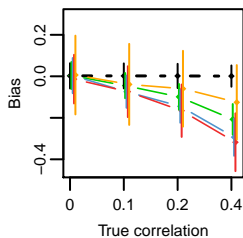

Bias pcor

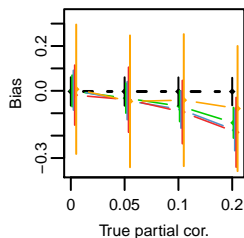

Bias lm phen ~ met

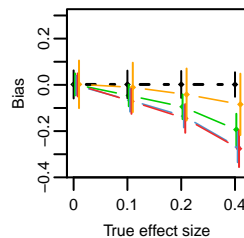

Bias lm met ~ phen

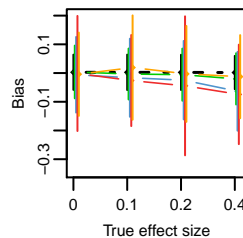

Bias logistic regr.

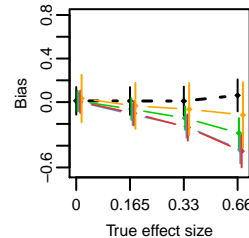

**E** Power cor

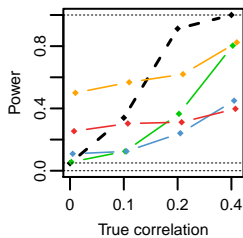

Power pcor

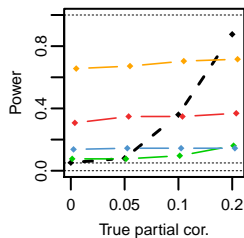

Power lm phen ~ met

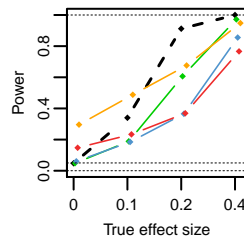

Power lm met ~ phen

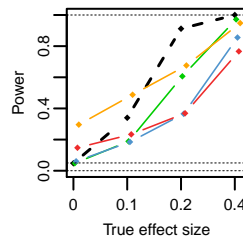

Power logistic regr.

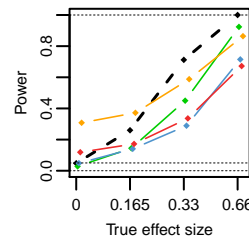

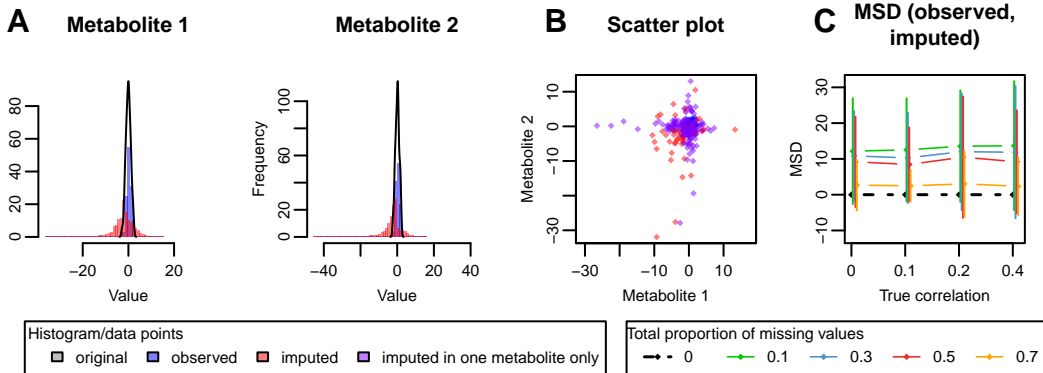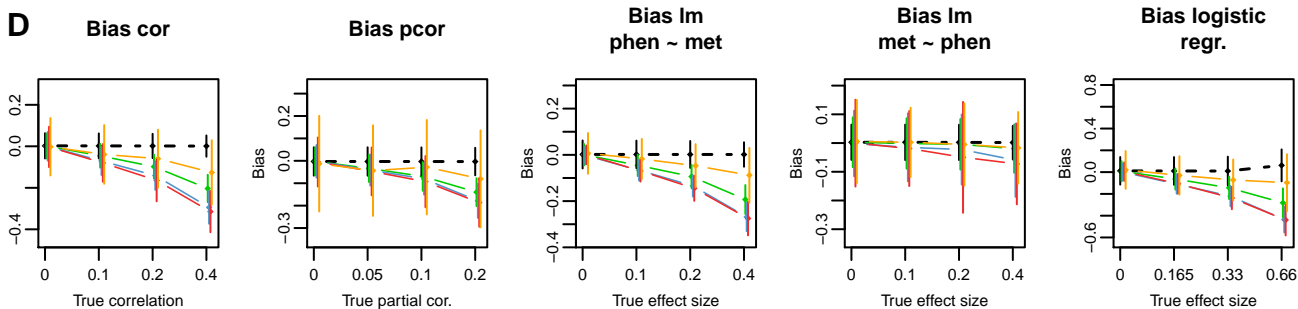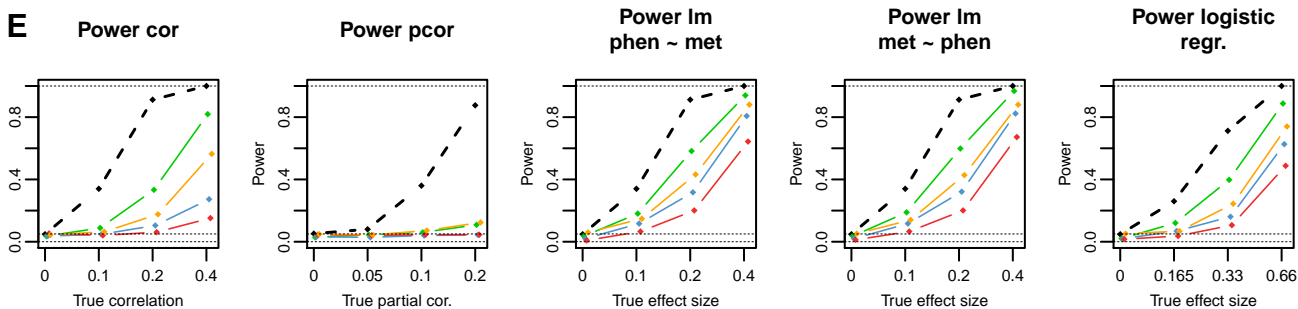

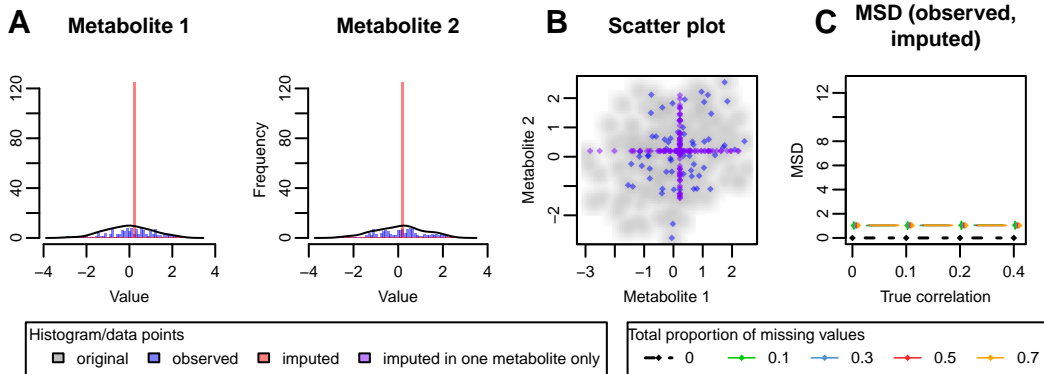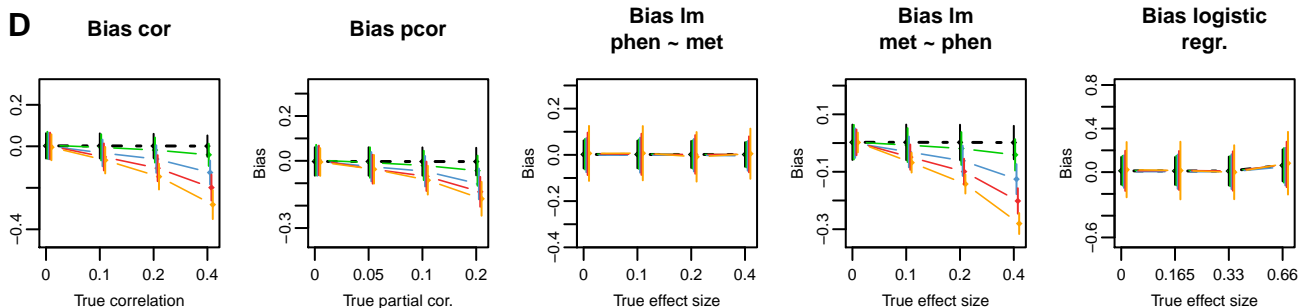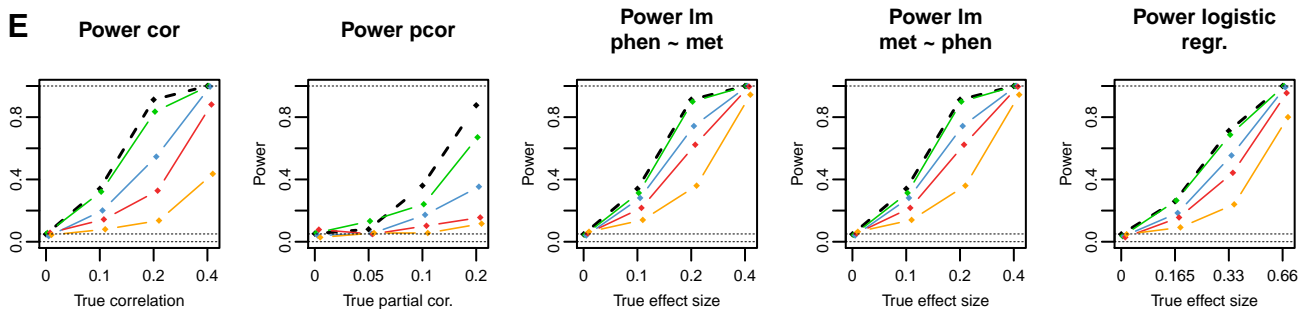

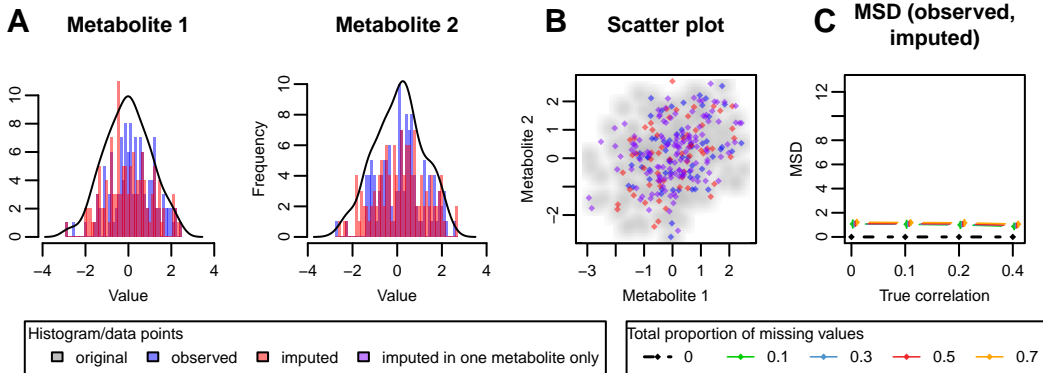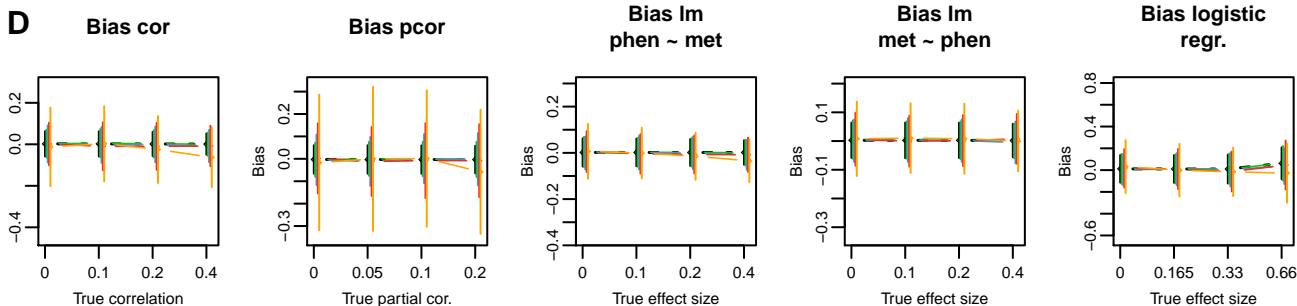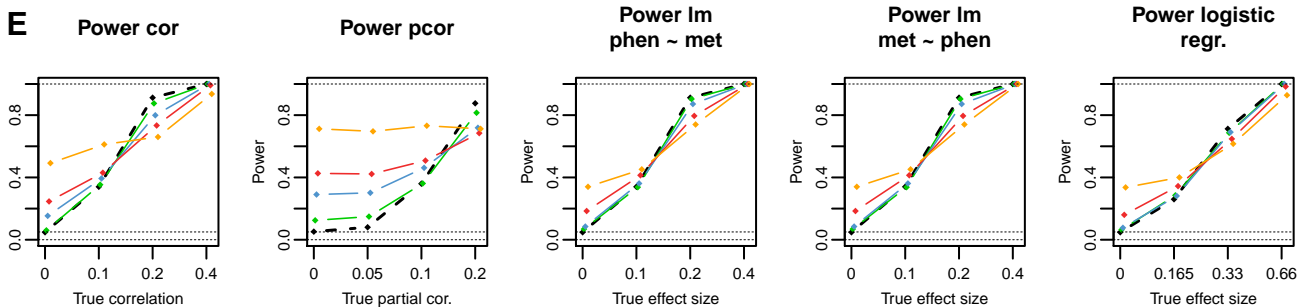

**A** Metabolite 1

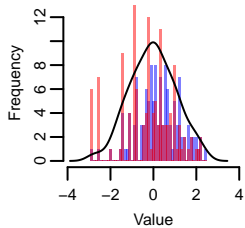

Metabolite 2

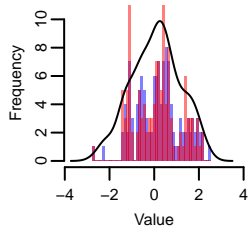

**B** Scatter plot

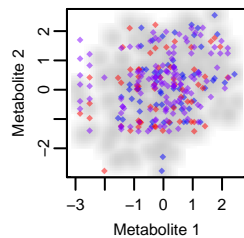

**C** MSD (observed, imputed)

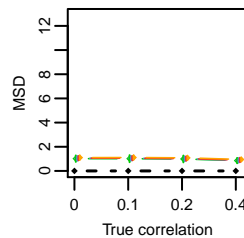

Histogram/data points  
 ■ original ■ observed ■ imputed ■ imputed in one metabolite only

Total proportion of missing values  
 ● 0 ● 0.1 ● 0.3 ● 0.5 ● 0.7

**D** Bias cor

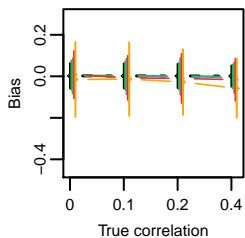

Bias pcor

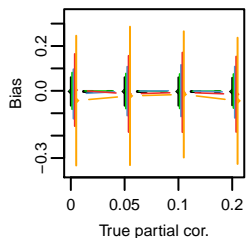

Bias lm phen ~ met

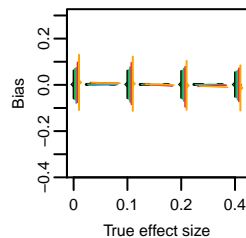

Bias lm met ~ phen

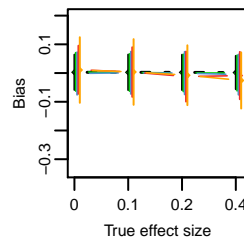

Bias logistic regr.

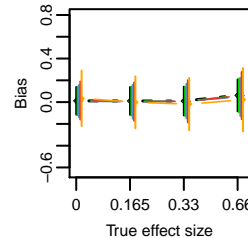

**E** Power cor

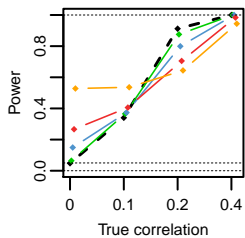

Power pcor

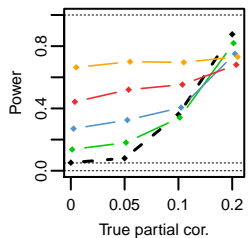

Power lm phen ~ met

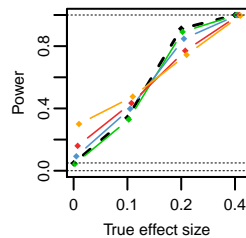

Power lm met ~ phen

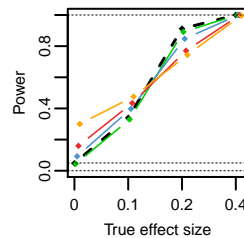

Power logistic regr.

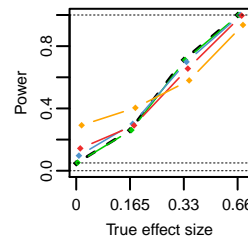



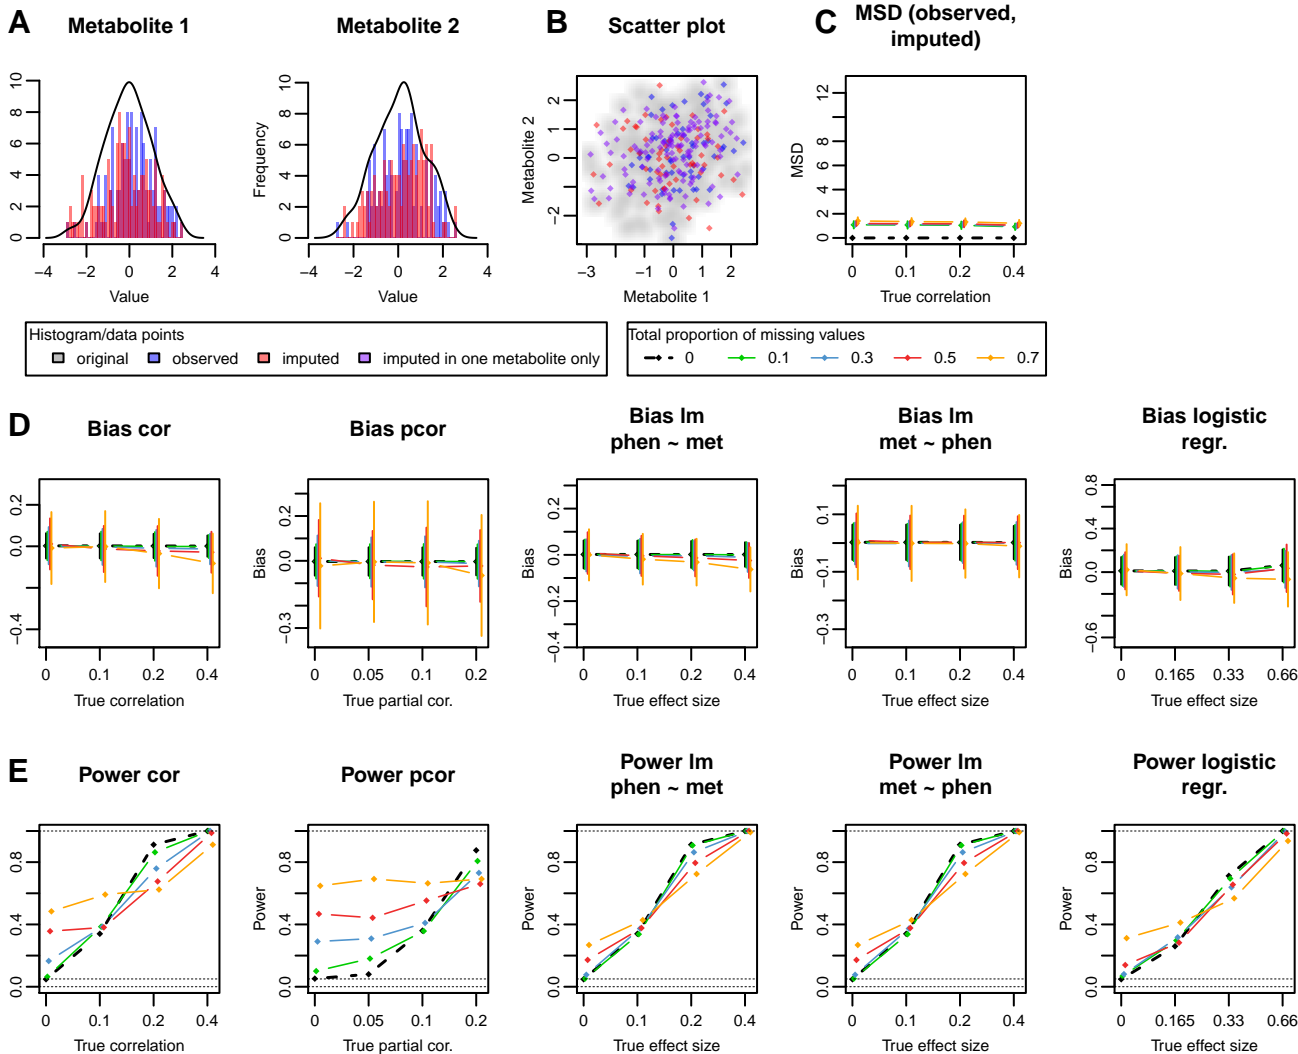

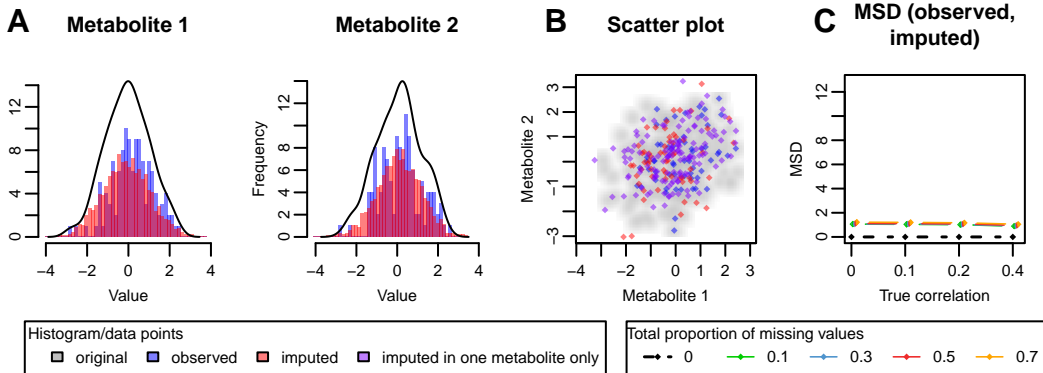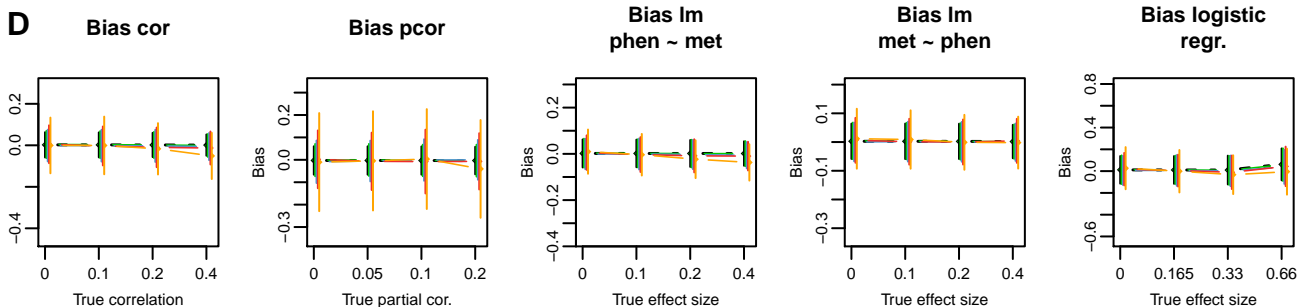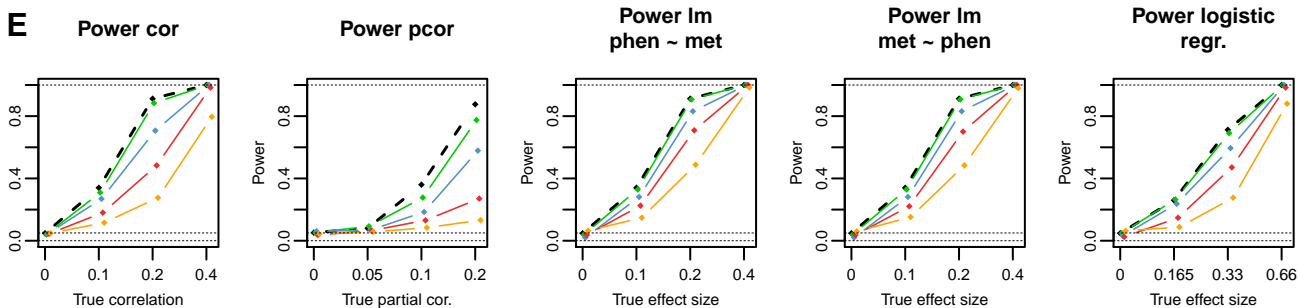

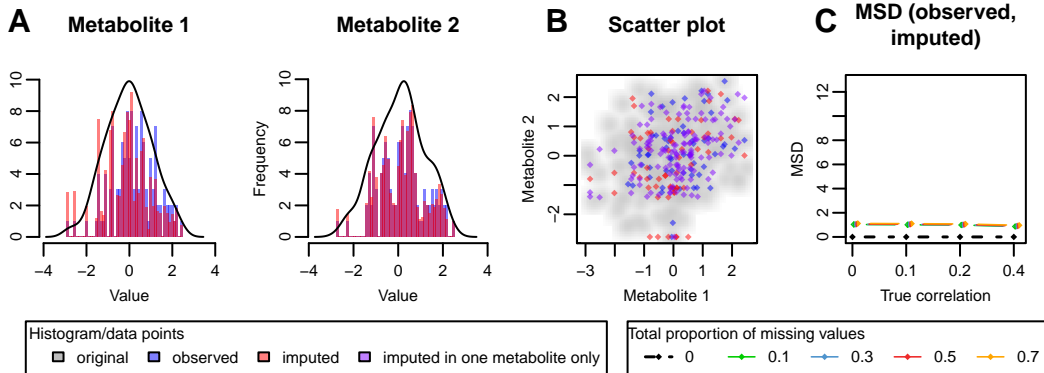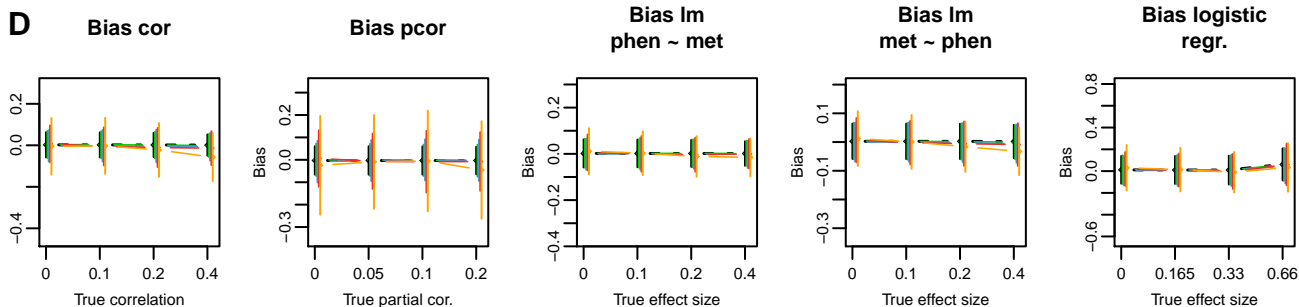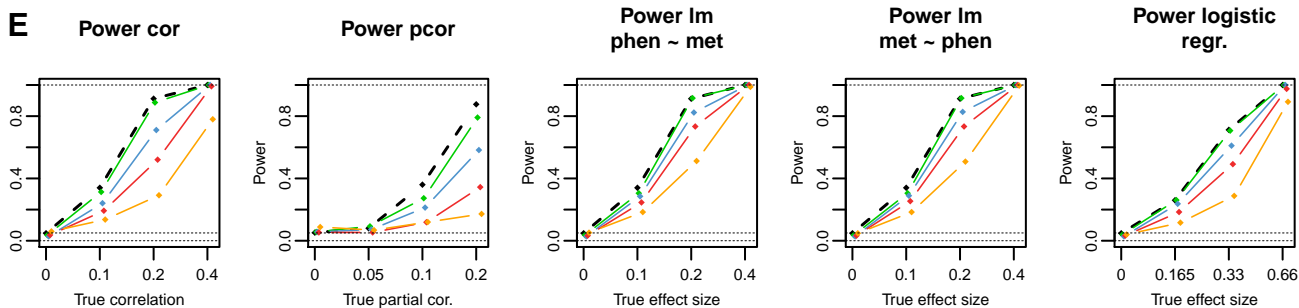

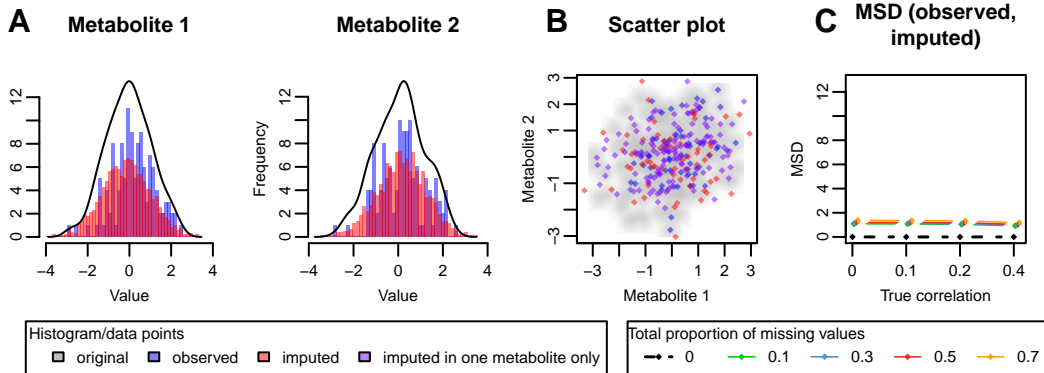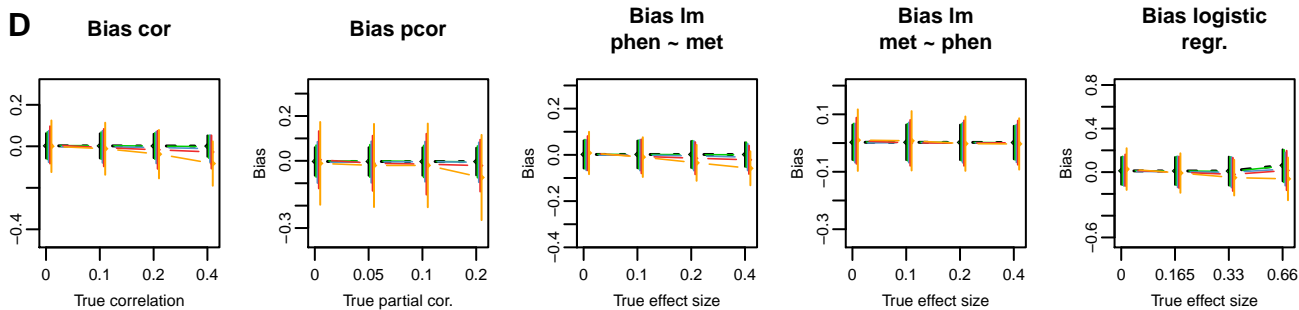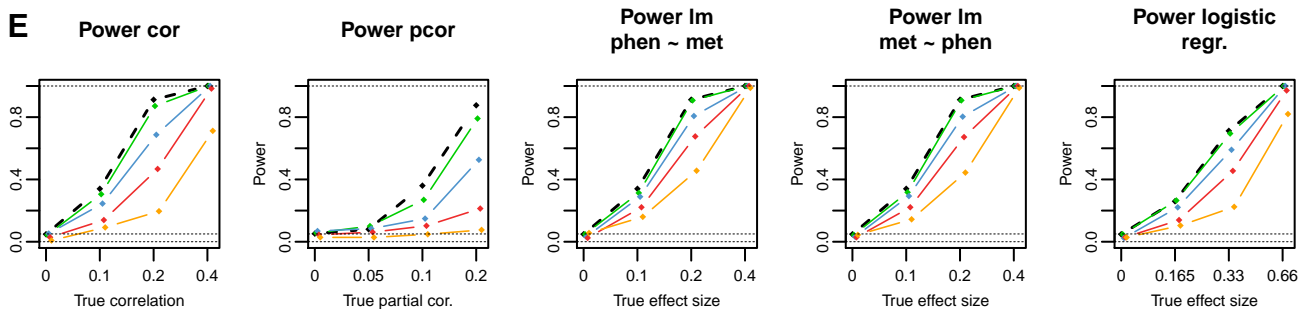

**A** Metabolite 1

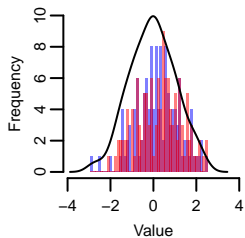

Metabolite 2

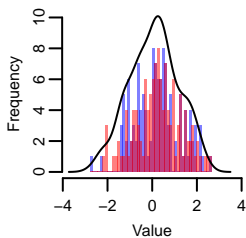

**B** Scatter plot

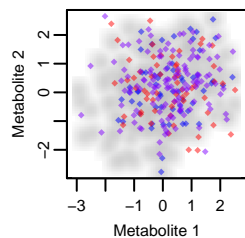

**C** MSD (observed, imputed)

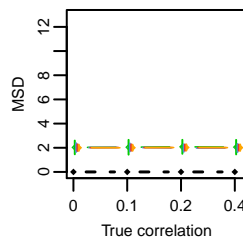

Histogram/data points  
 ■ original ■ observed ■ imputed ■ imputed in one metabolite only

Total proportion of missing values  
 - - 0 — 0.1 — 0.3 — 0.5 — 0.7

**D** Bias cor

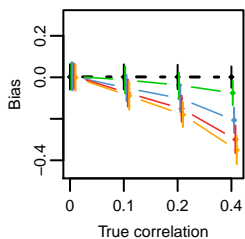

Bias pcor

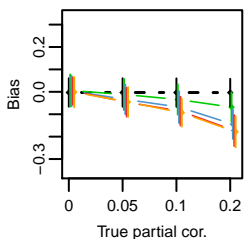

Bias lm phen ~ met

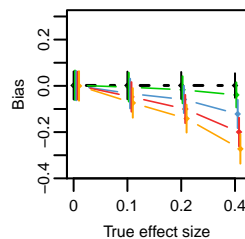

Bias lm met ~ phen

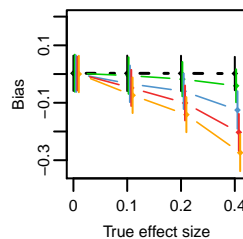

Bias logistic regr.

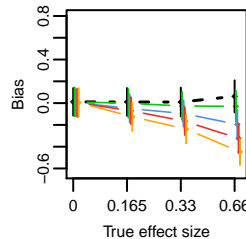

**E** Power cor

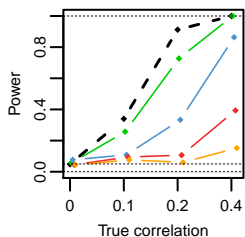

Power pcor

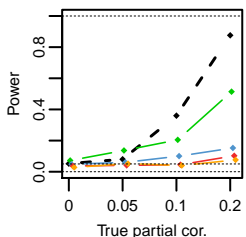

Power lm phen ~ met

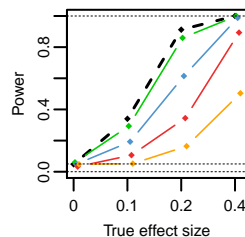

Power lm met ~ phen

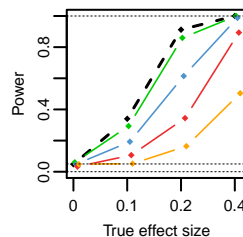

Power logistic regr.

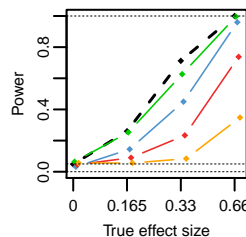

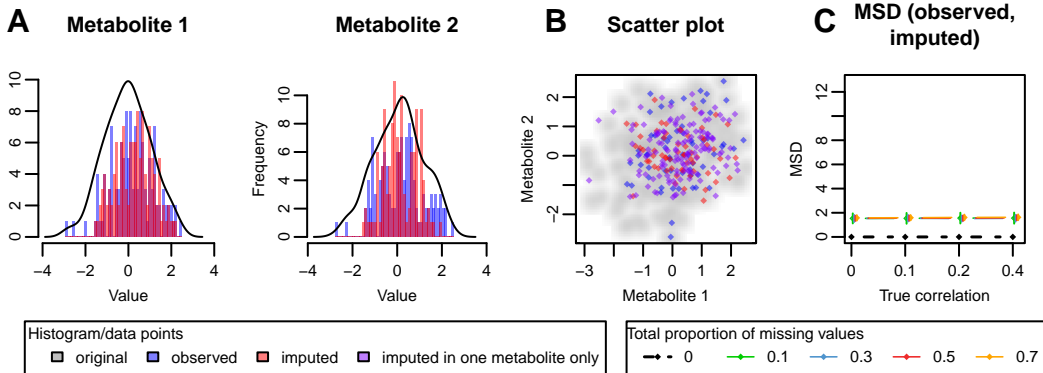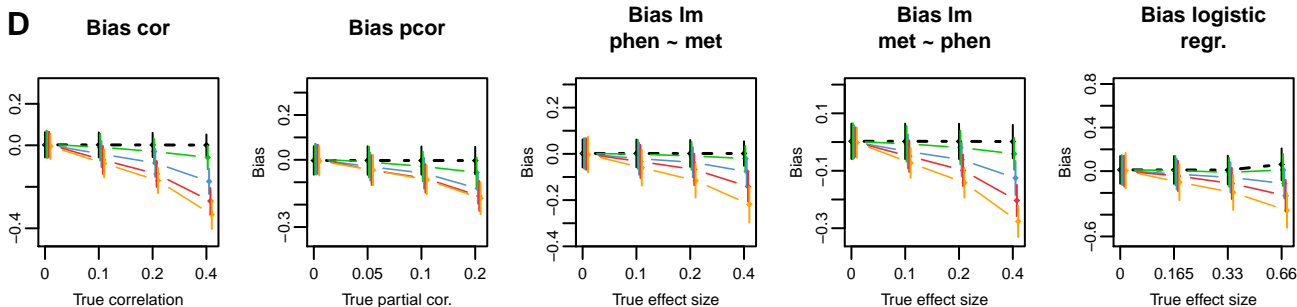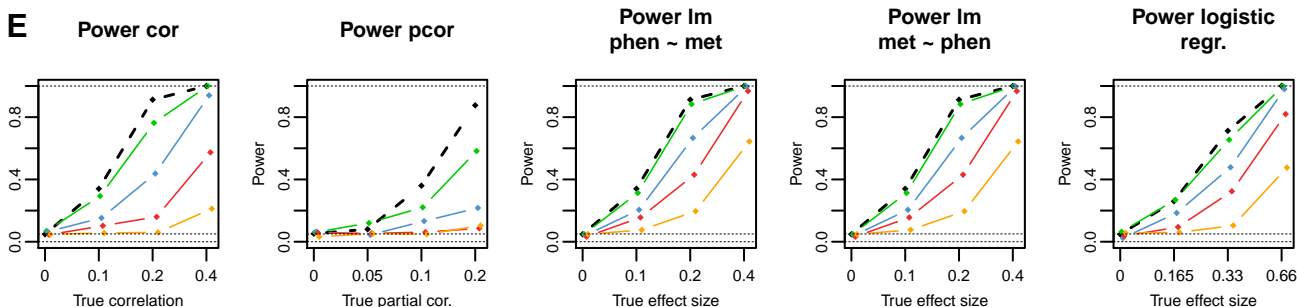

**A** Metabolite 1

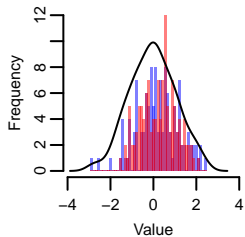

Metabolite 2

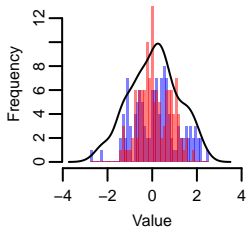

**B** Scatter plot

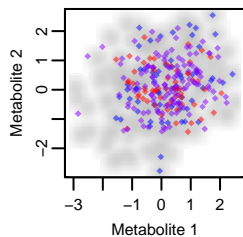

**C** MSD (observed, imputed)

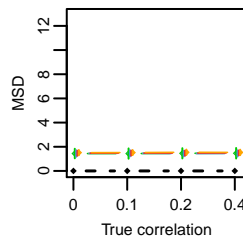

Histogram/data points  
 ■ original ■ observed ■ imputed ■ imputed in one metabolite only

Total proportion of missing values  
 - - 0 - - 0.1 - - 0.3 - - 0.5 - - 0.7

**D** Bias cor

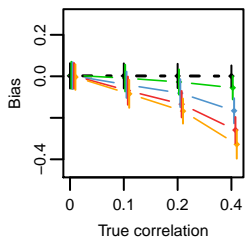

Bias pcor

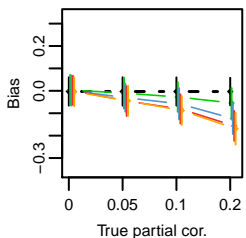

Bias lm phen ~ met

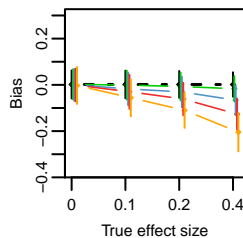

Bias lm met ~ phen

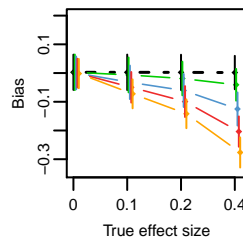

Bias logistic regr.

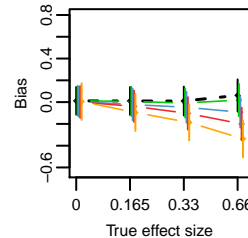

**E** Power cor

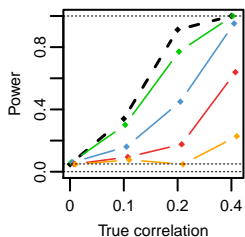

Power pcor

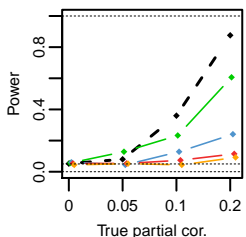

Power lm phen ~ met

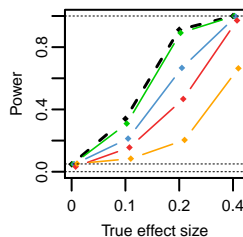

Power lm met ~ phen

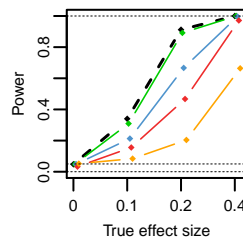

Power logistic regr.

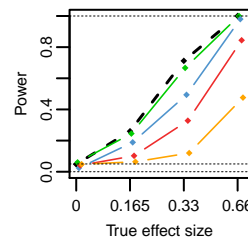

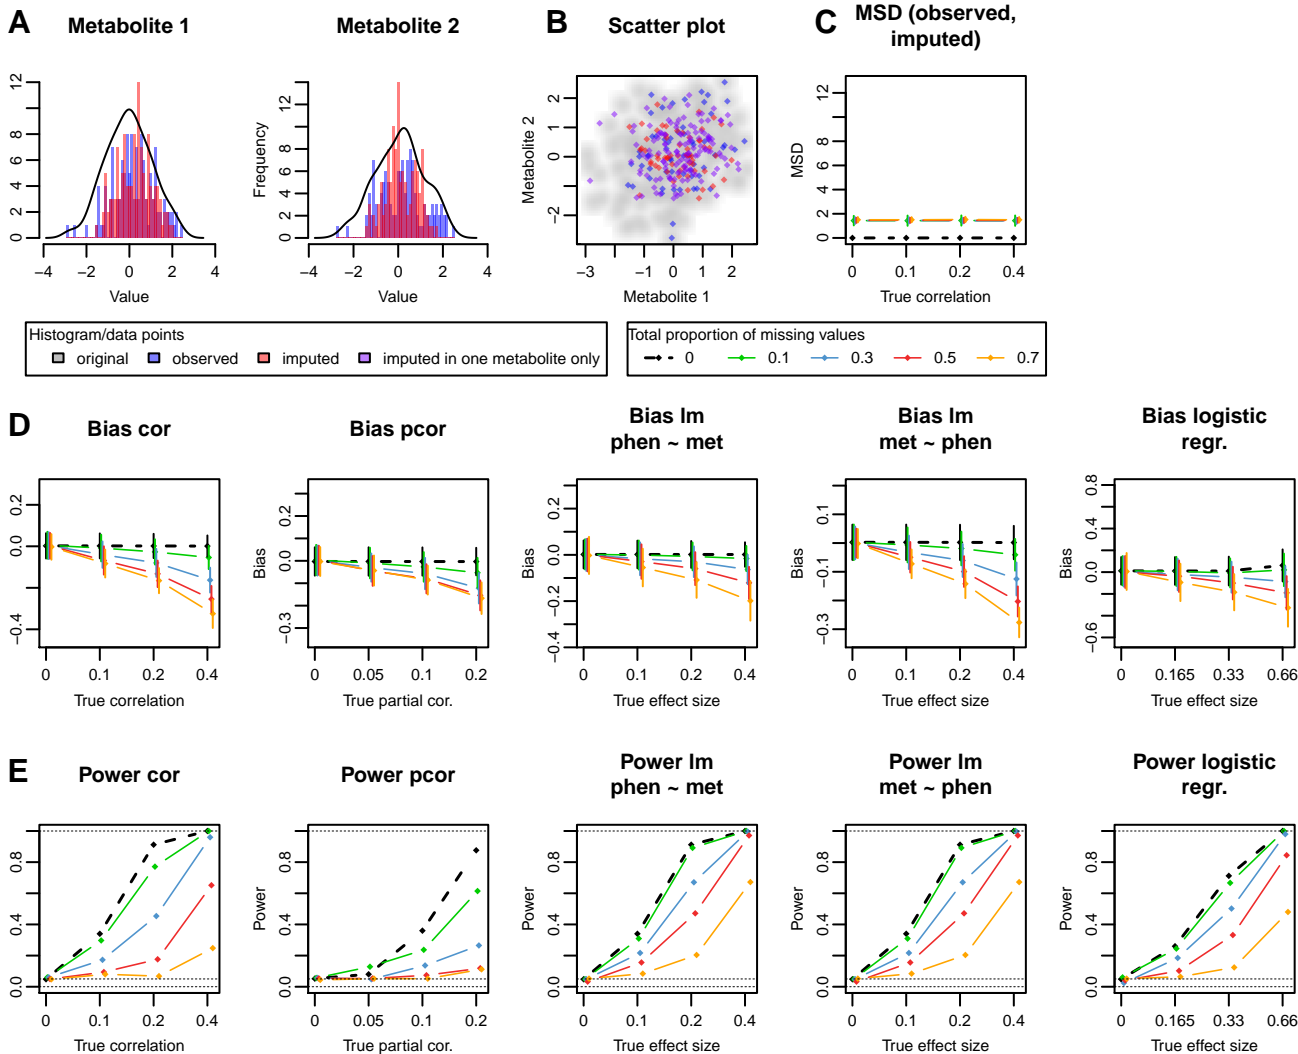



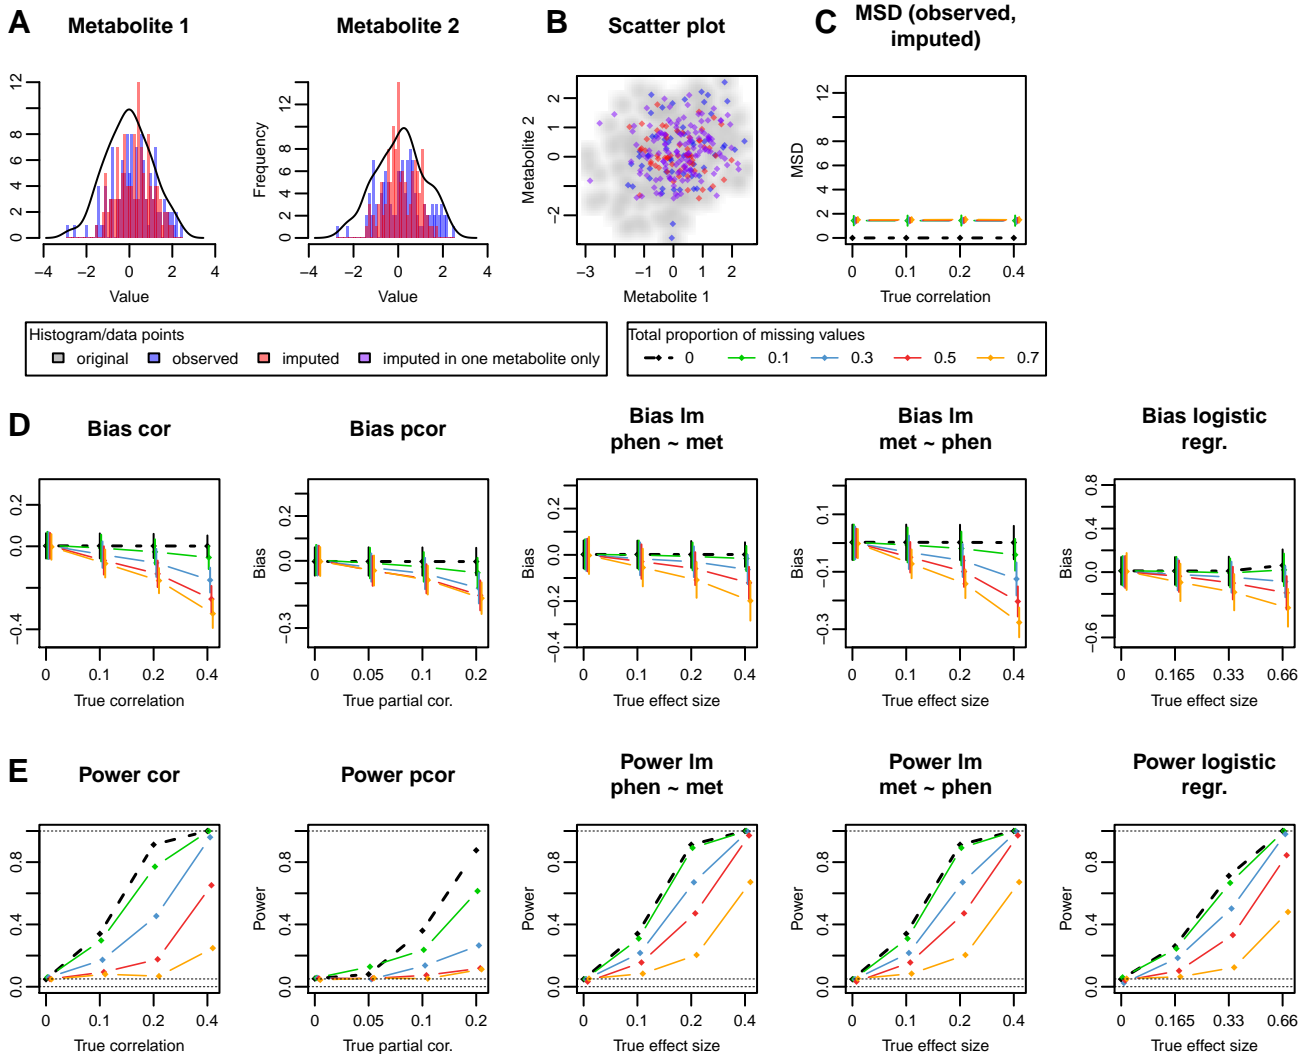

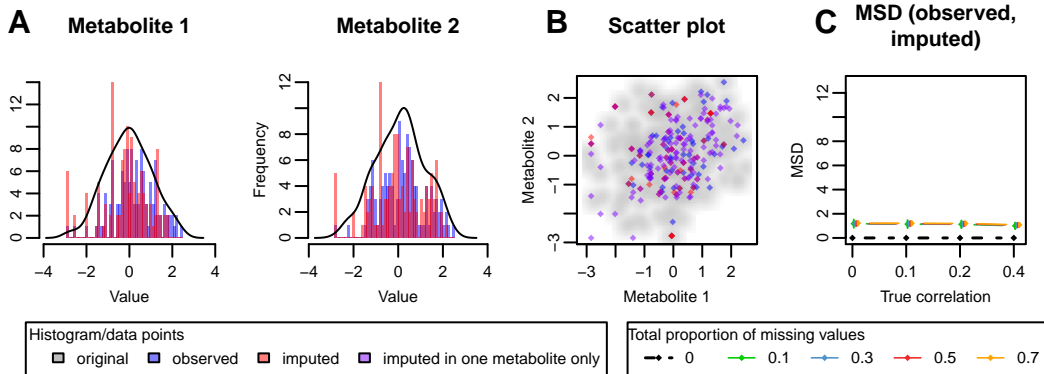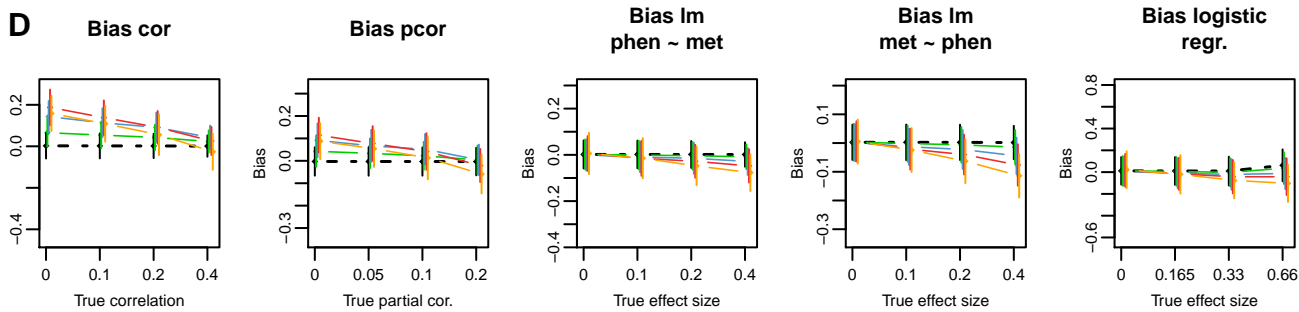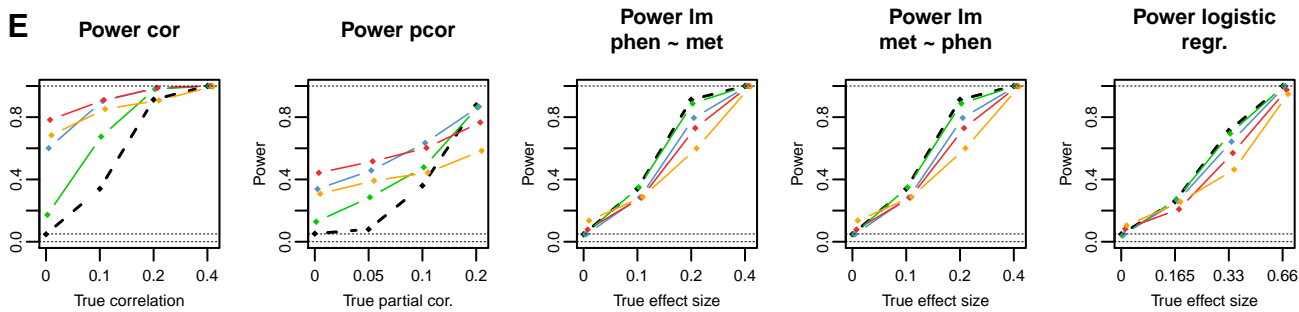

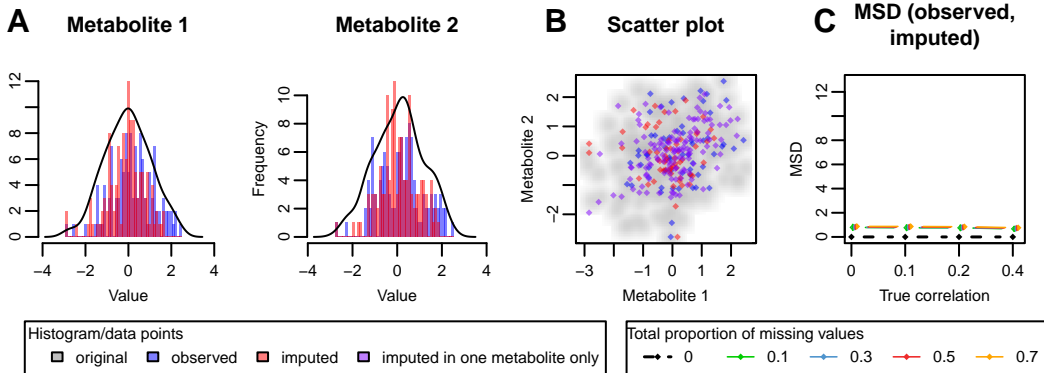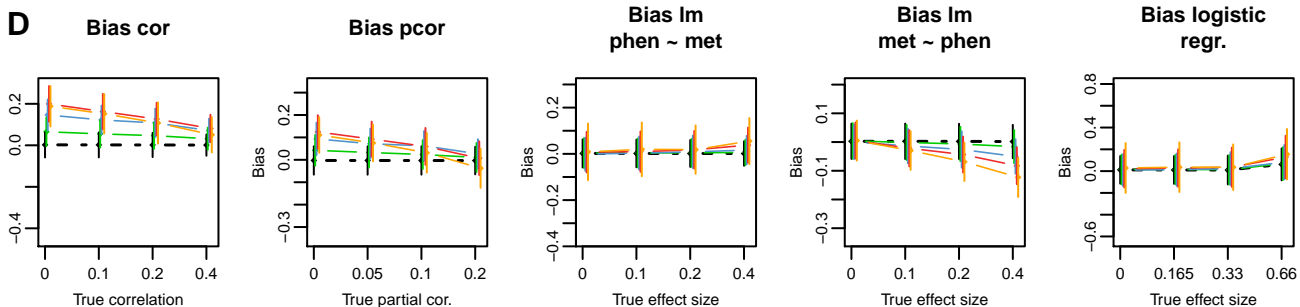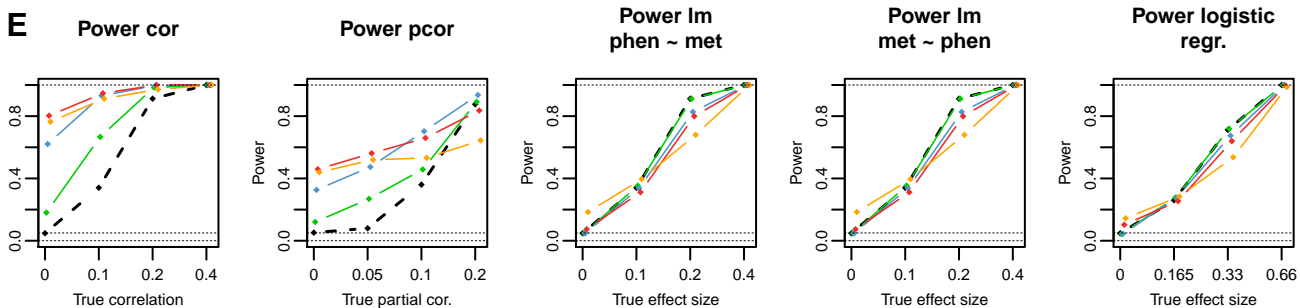

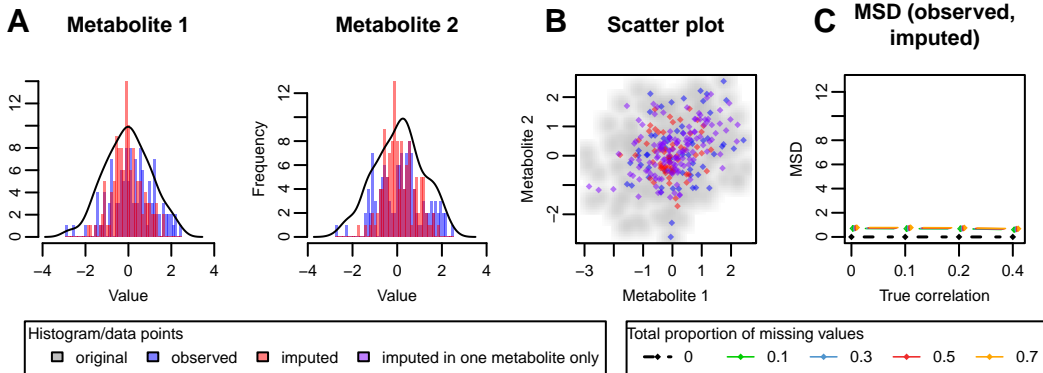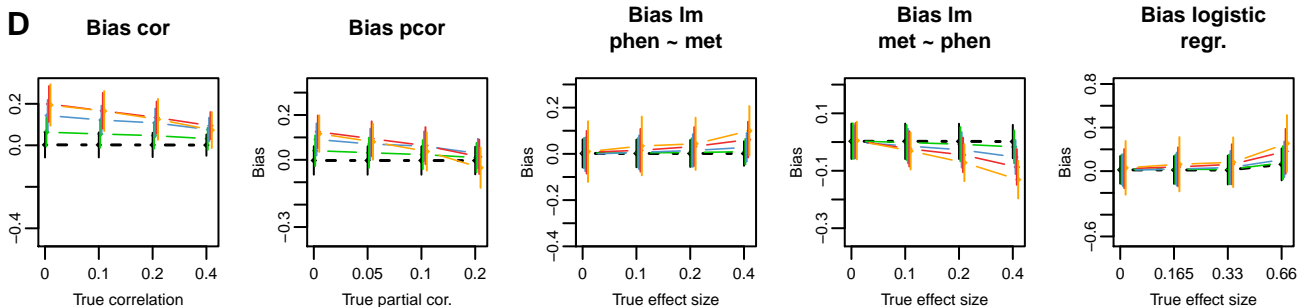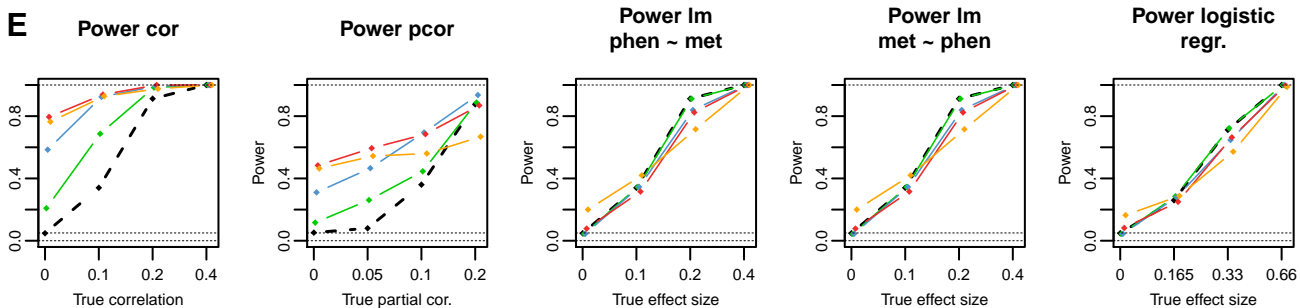

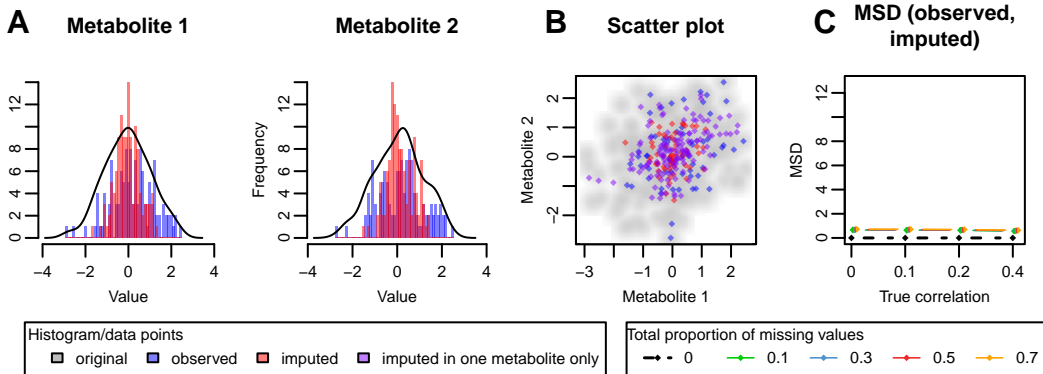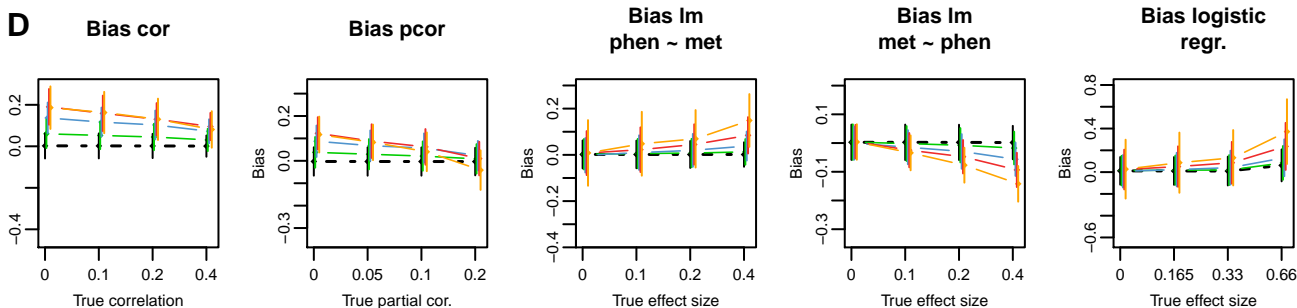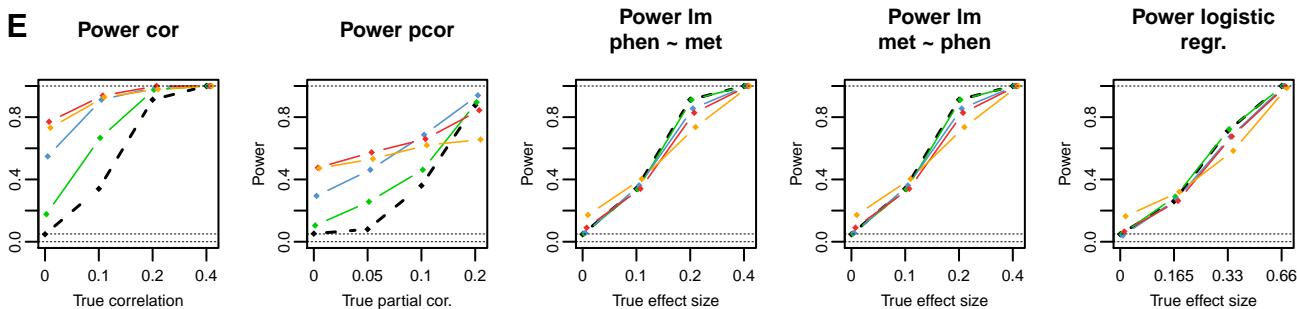

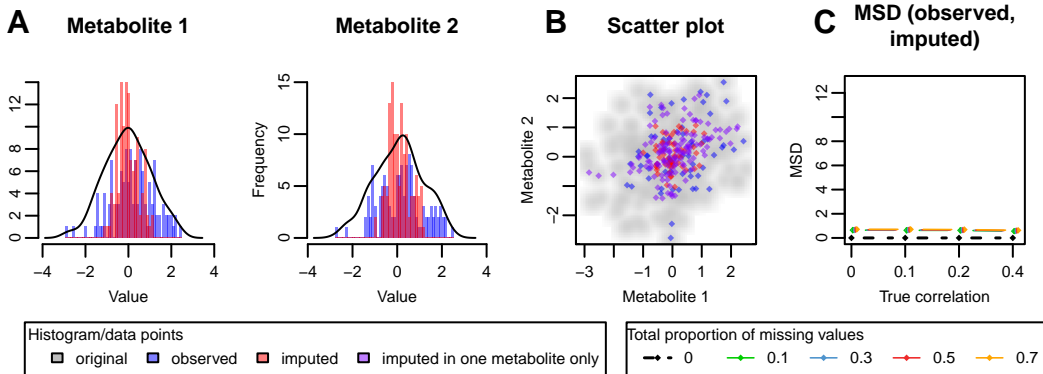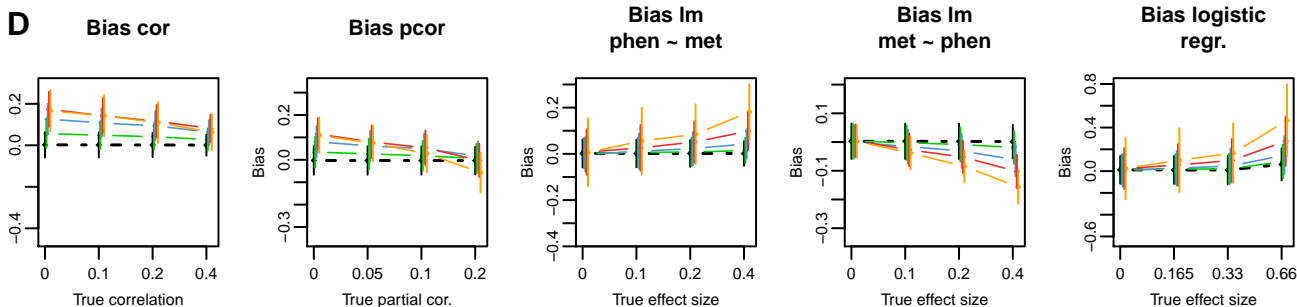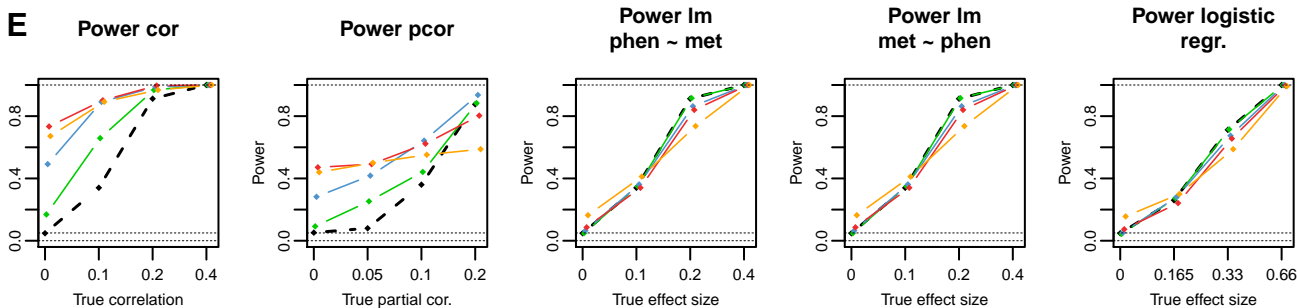

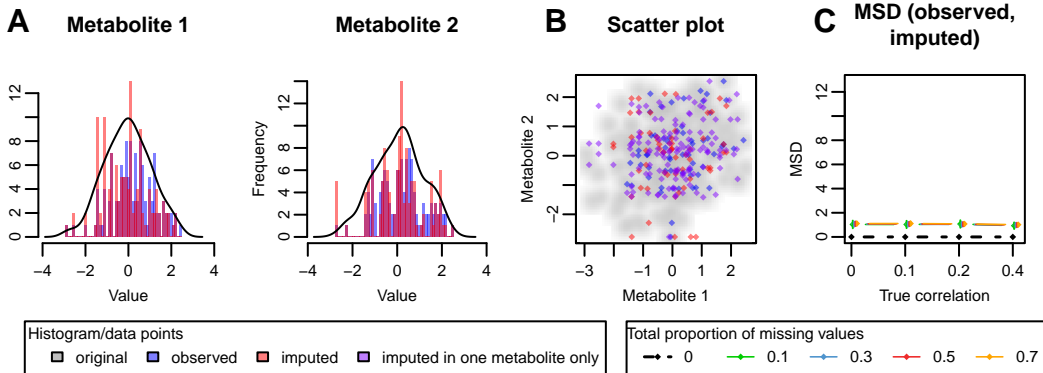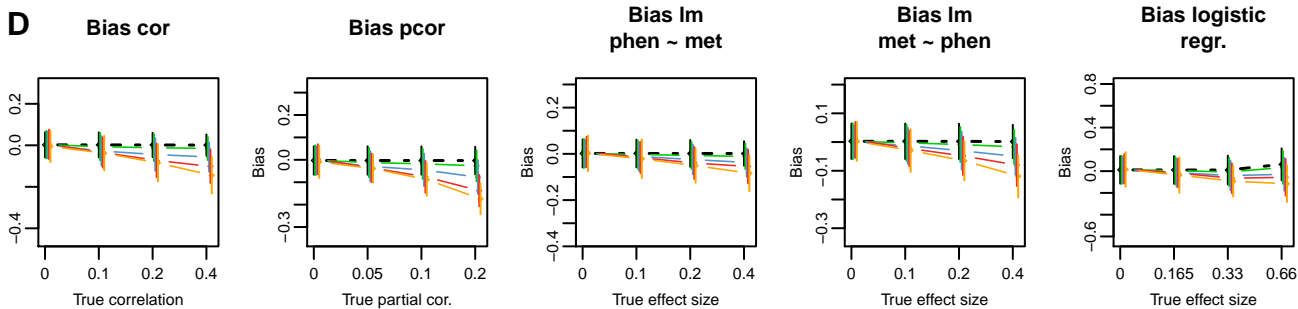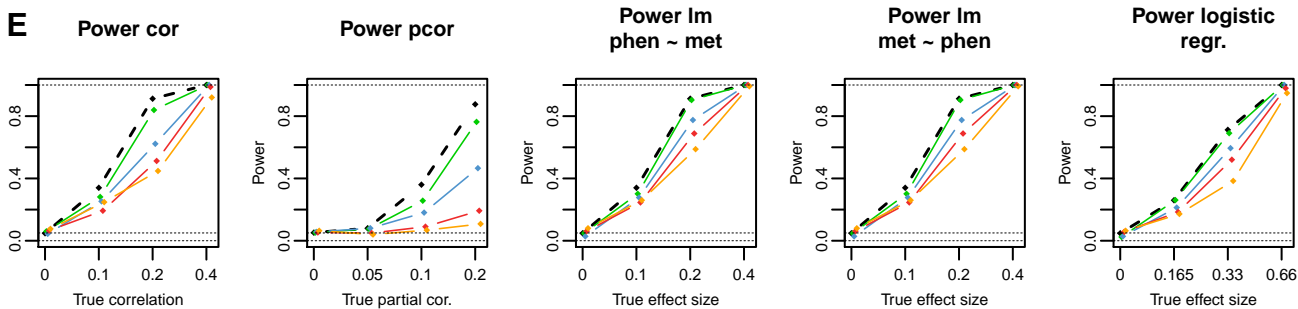

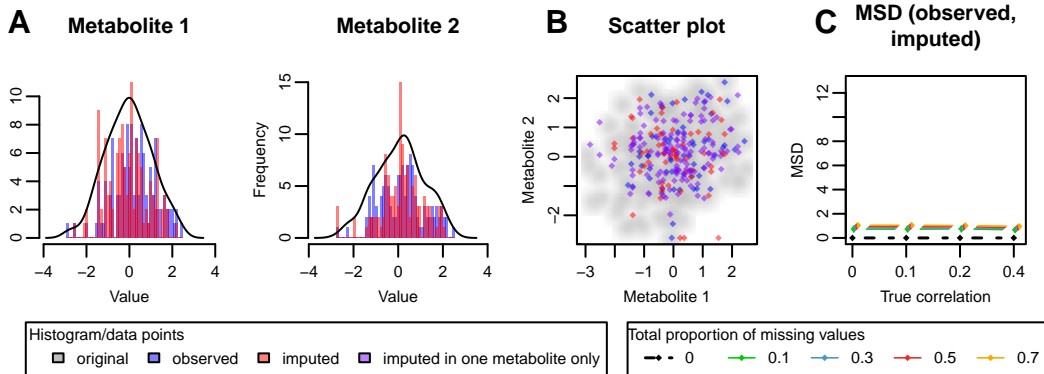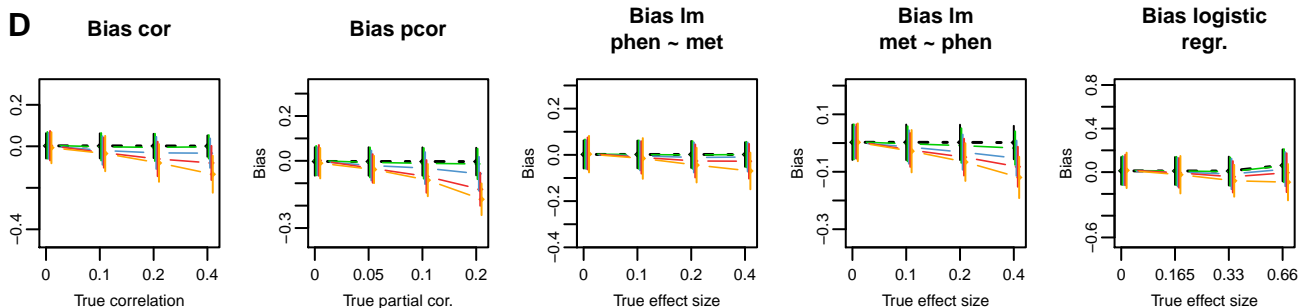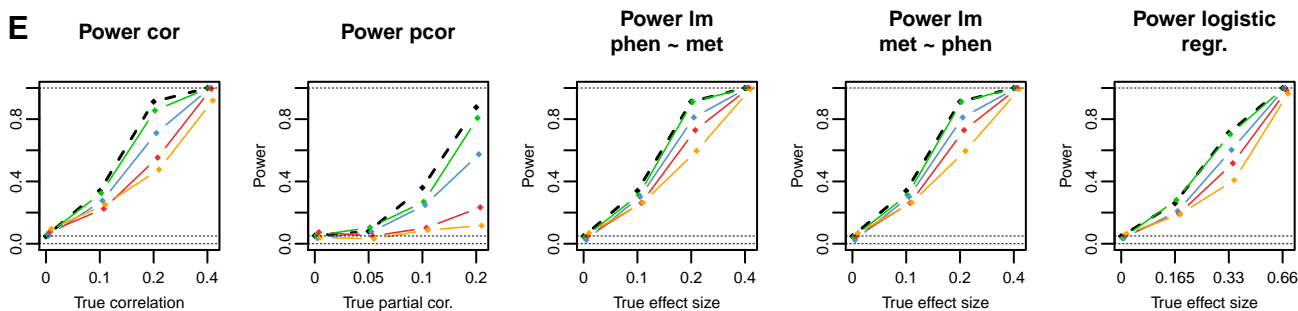



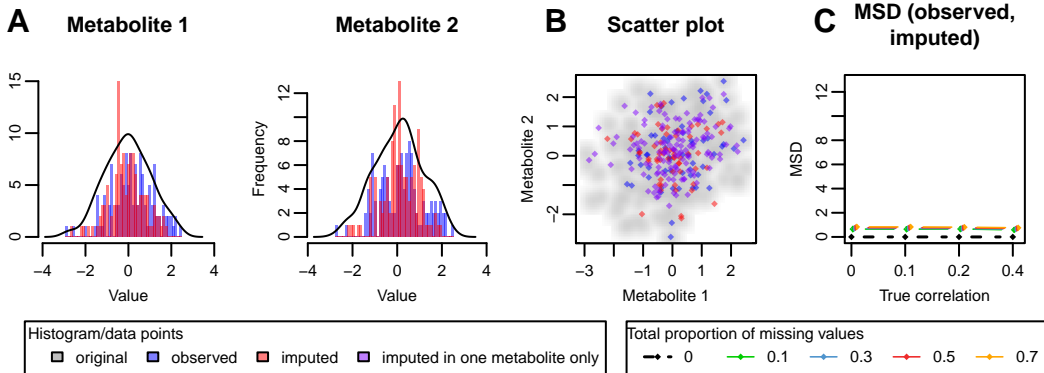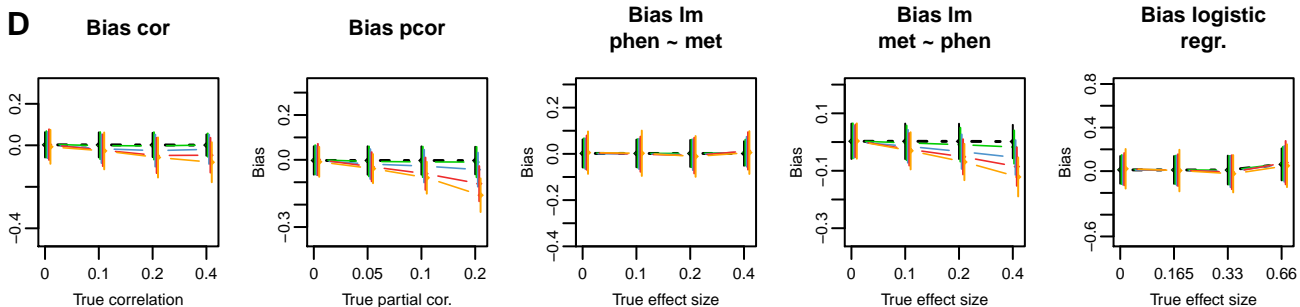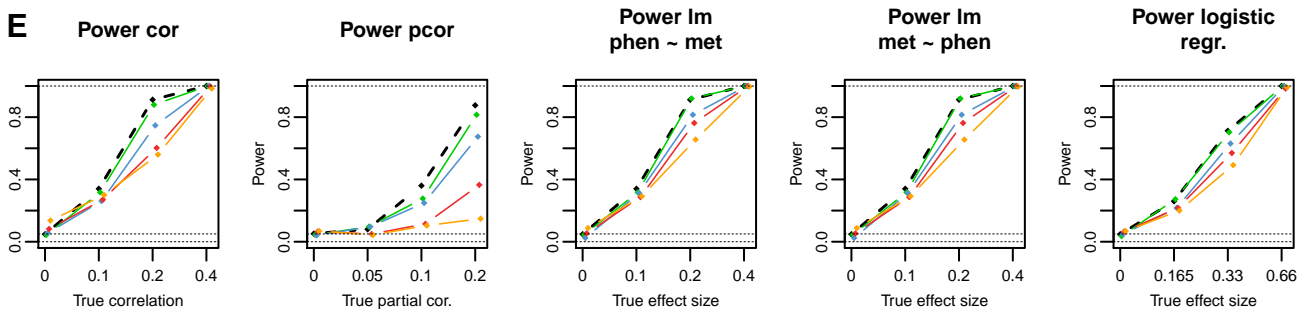

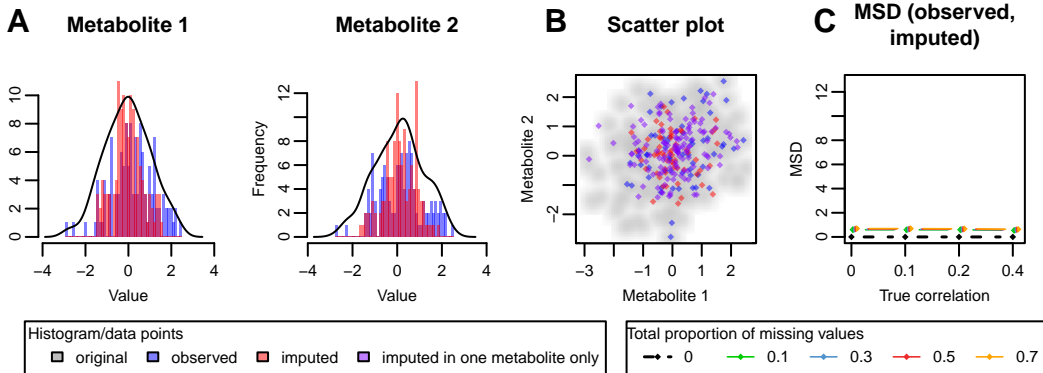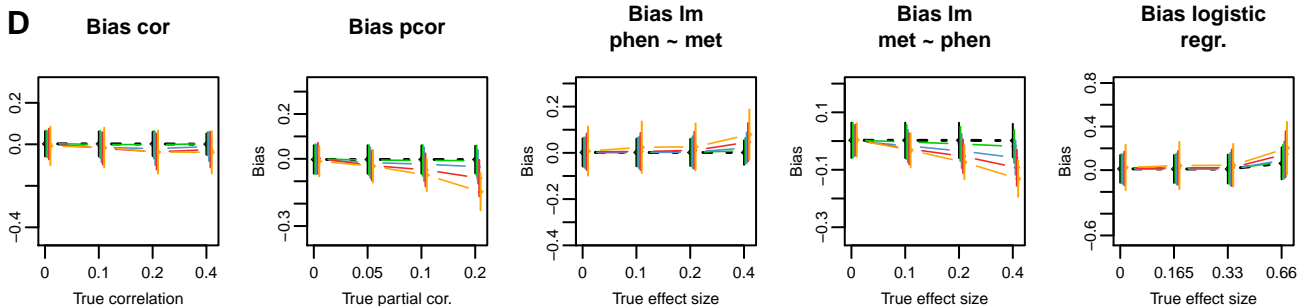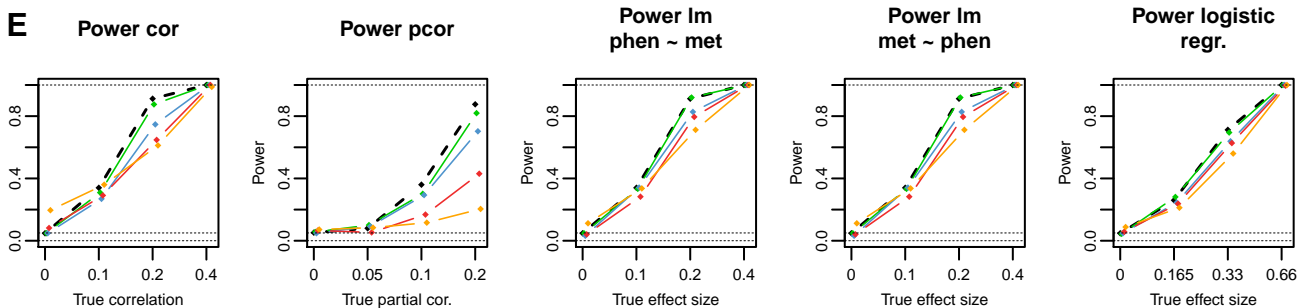

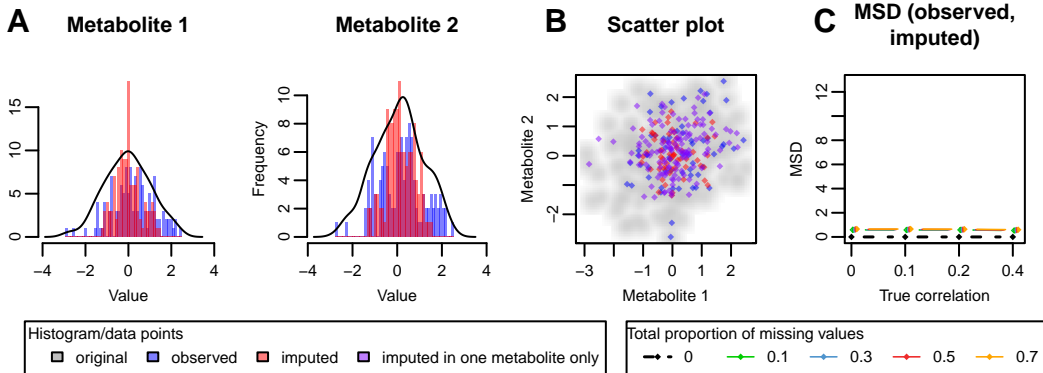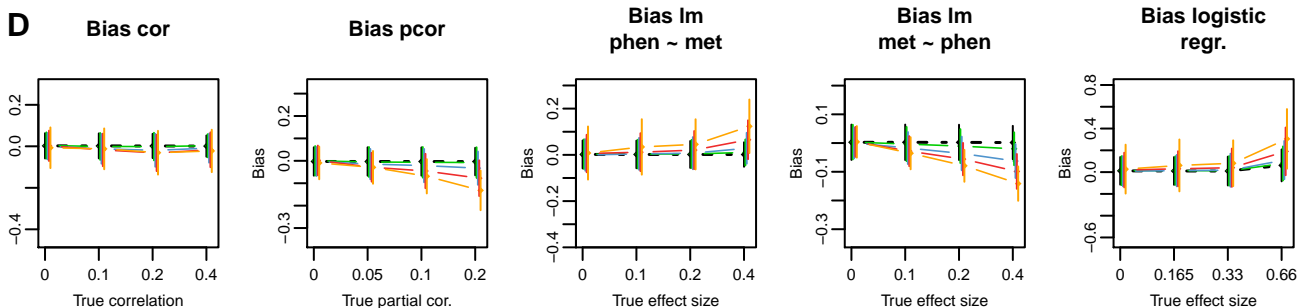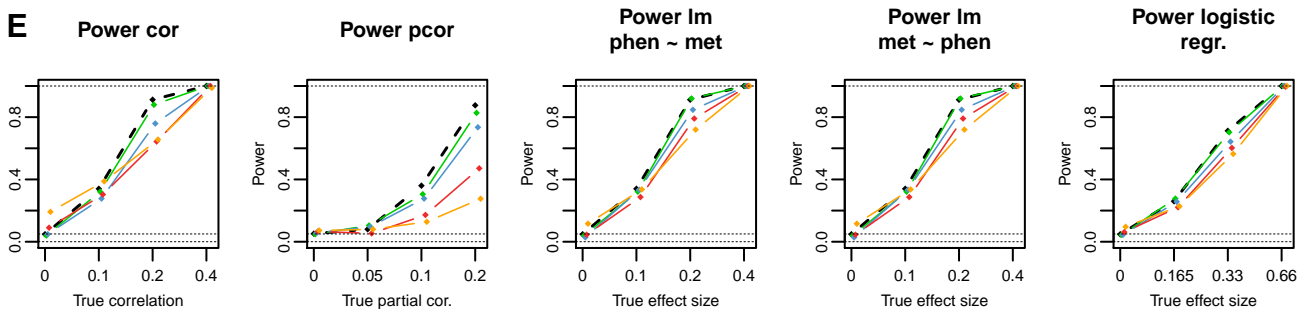

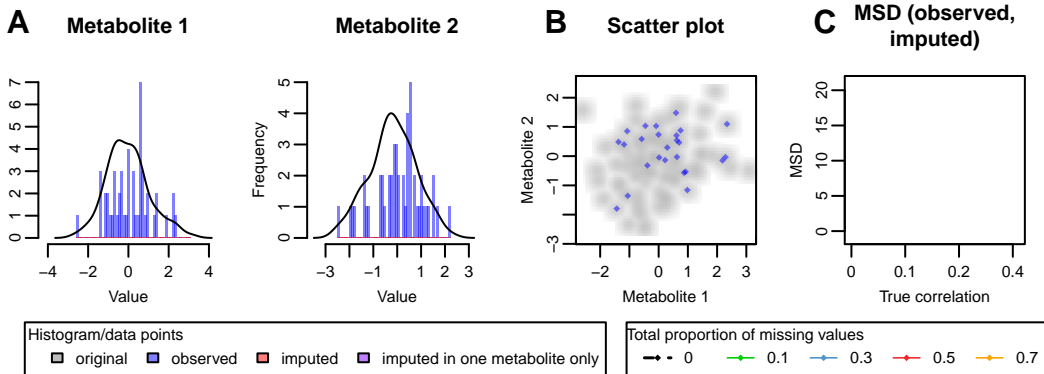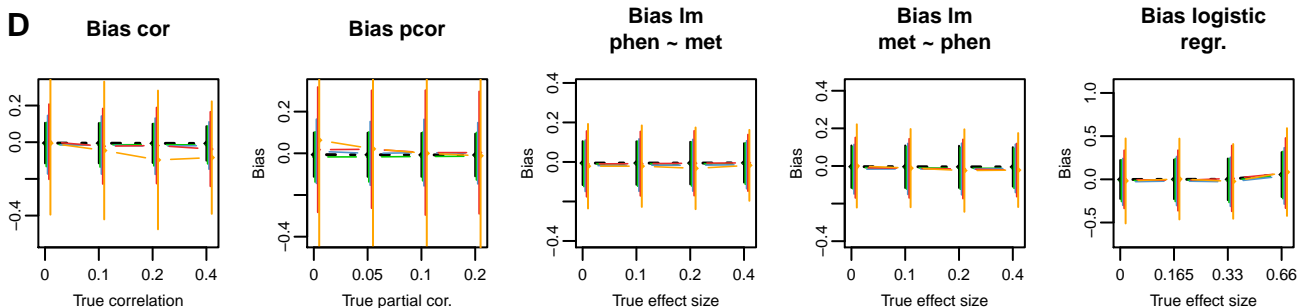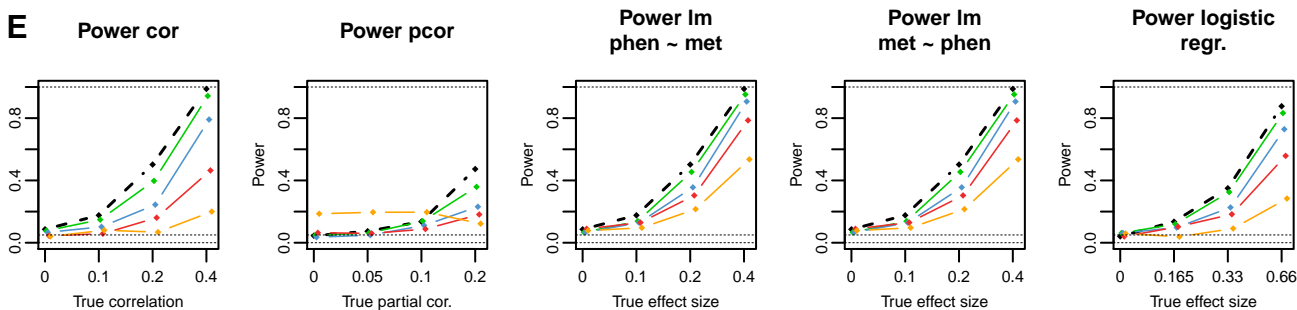

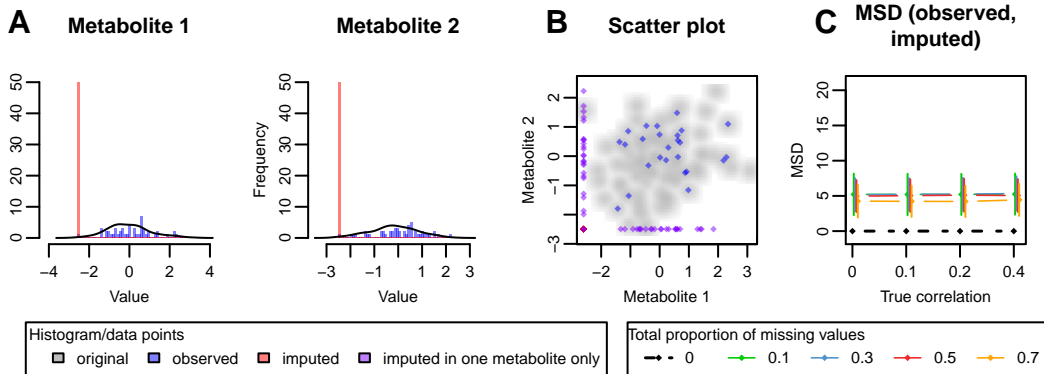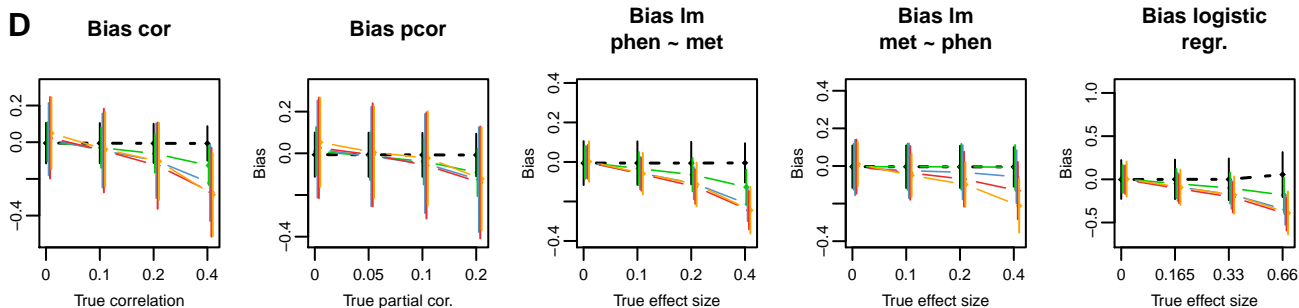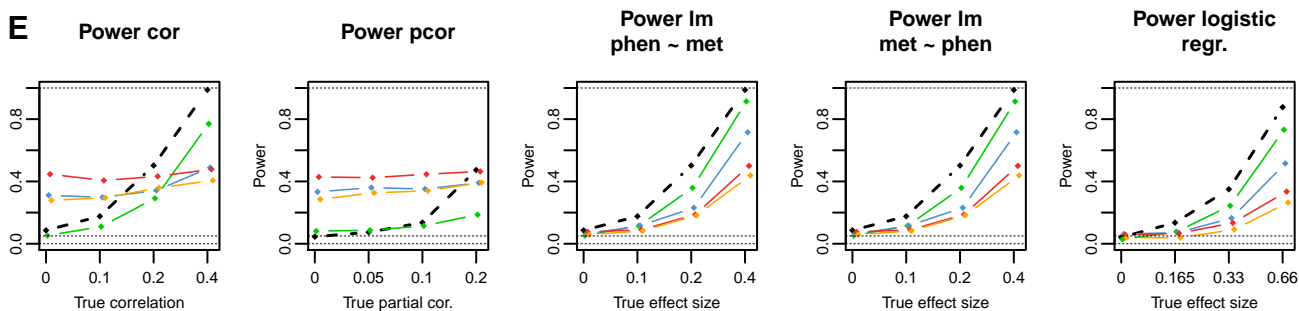

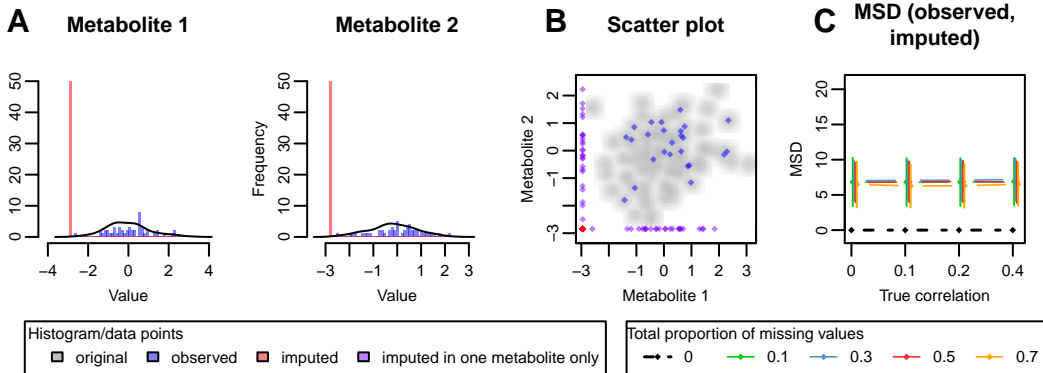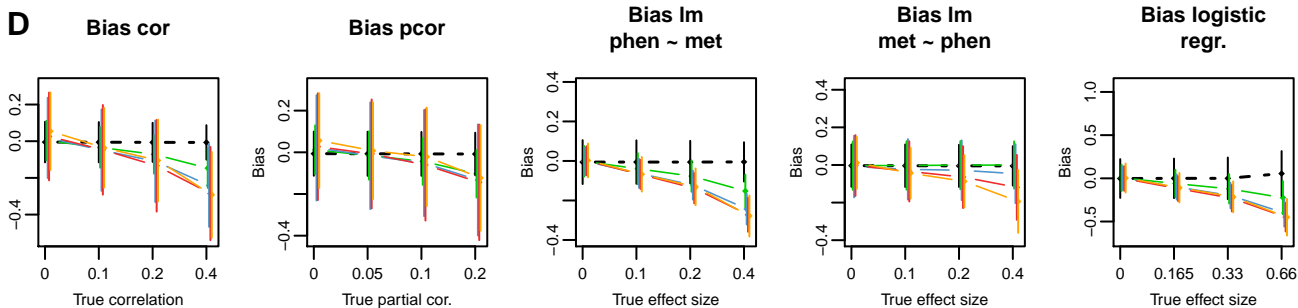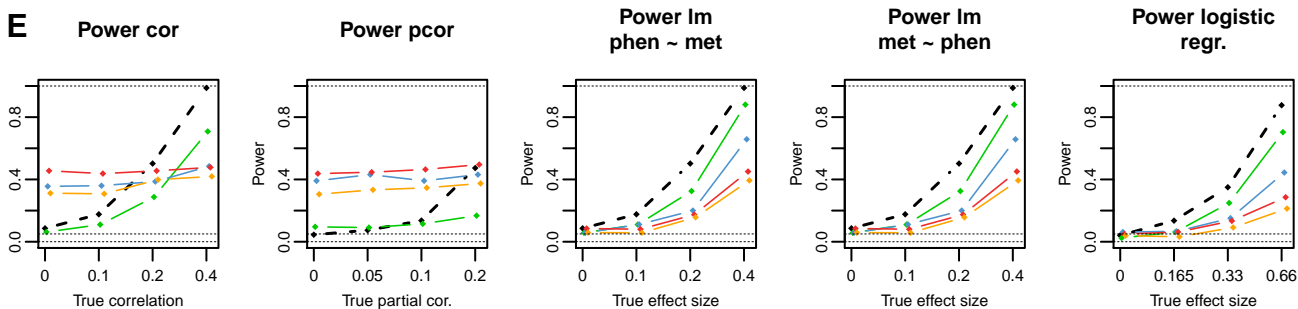

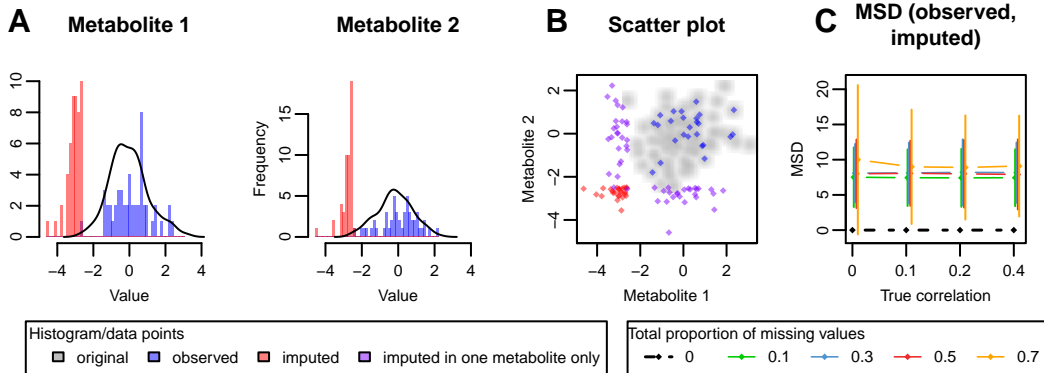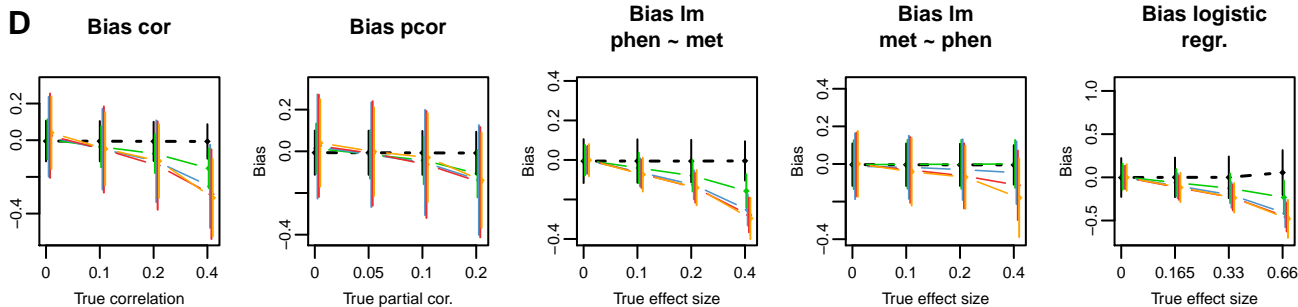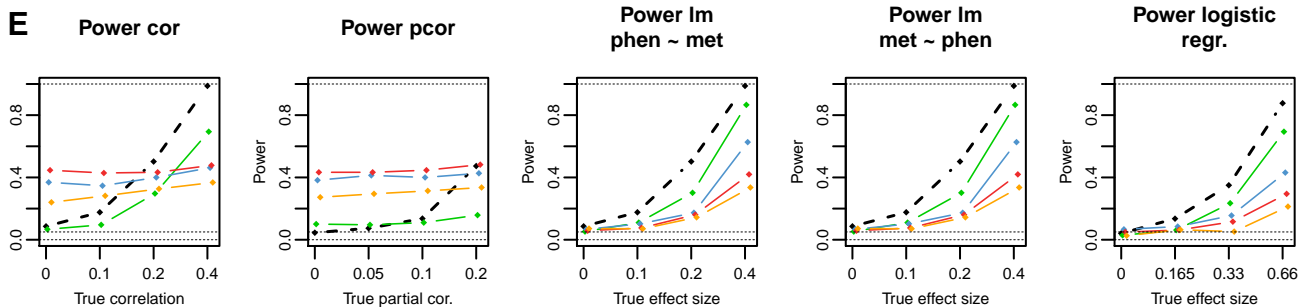

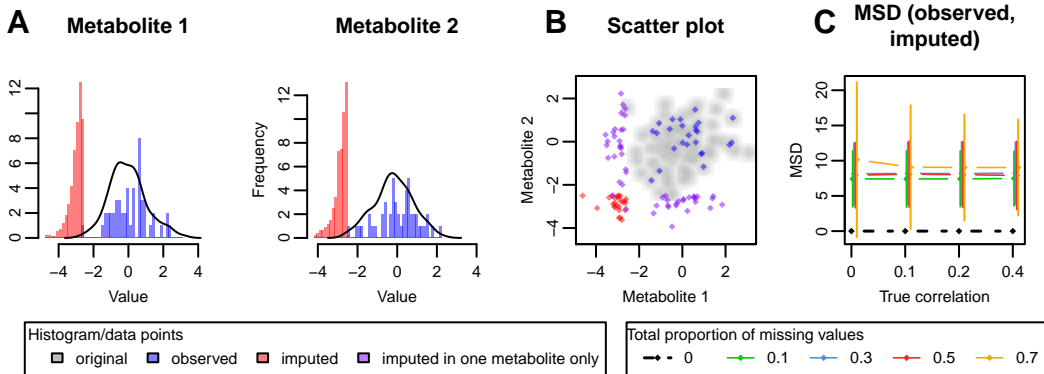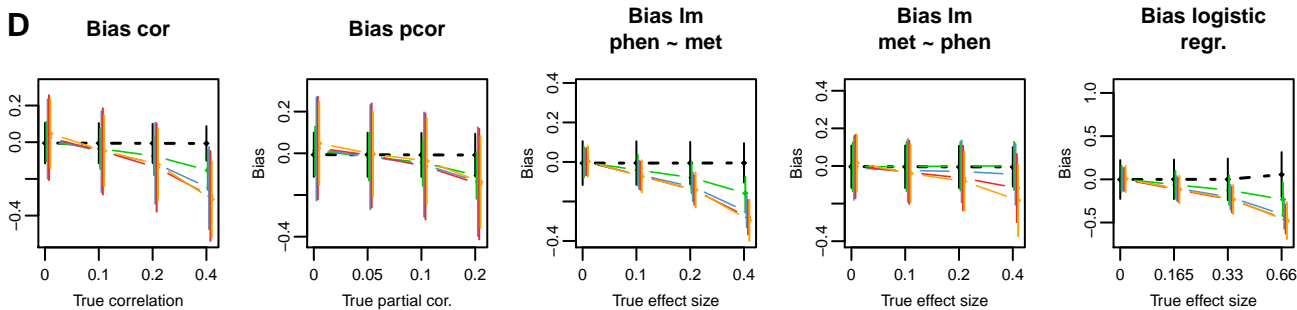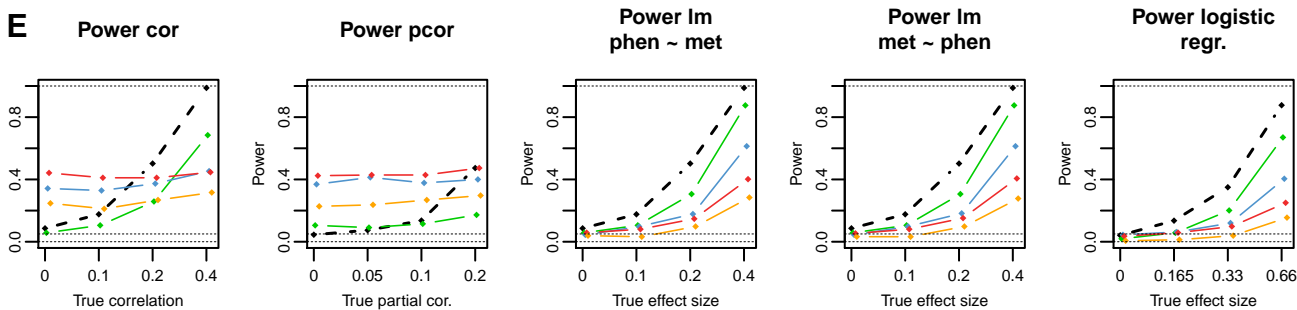



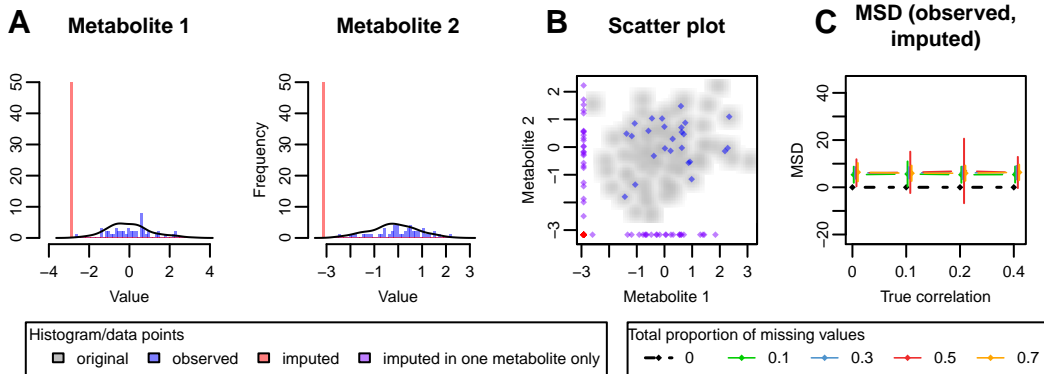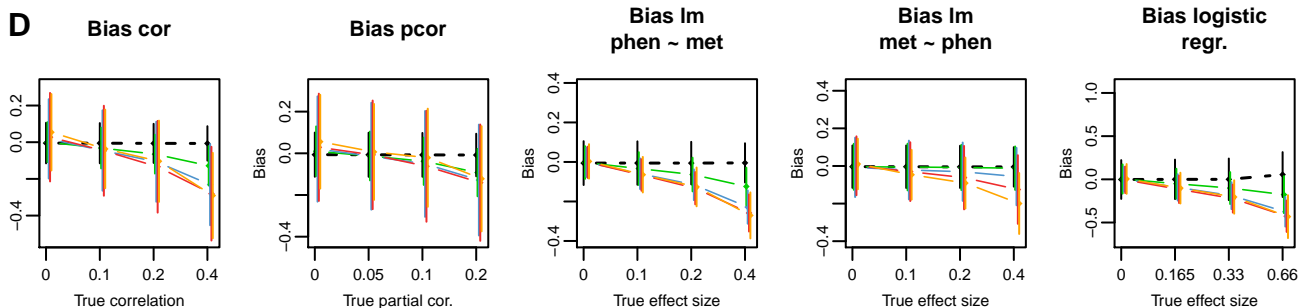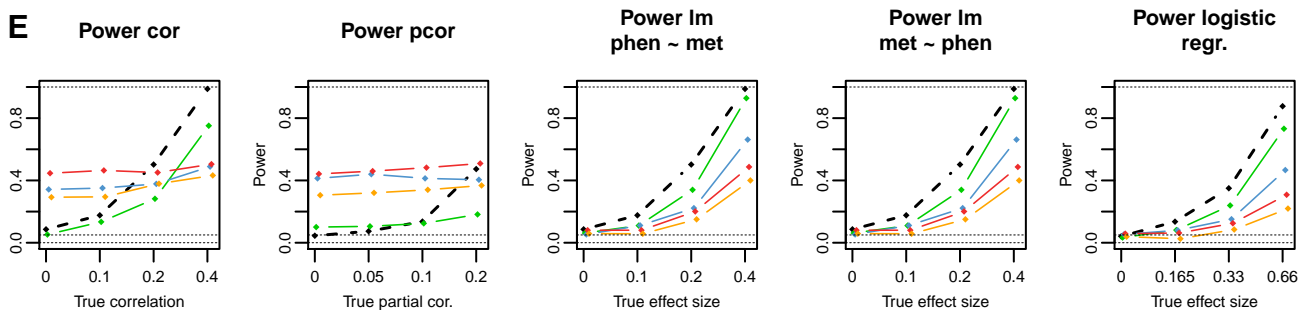

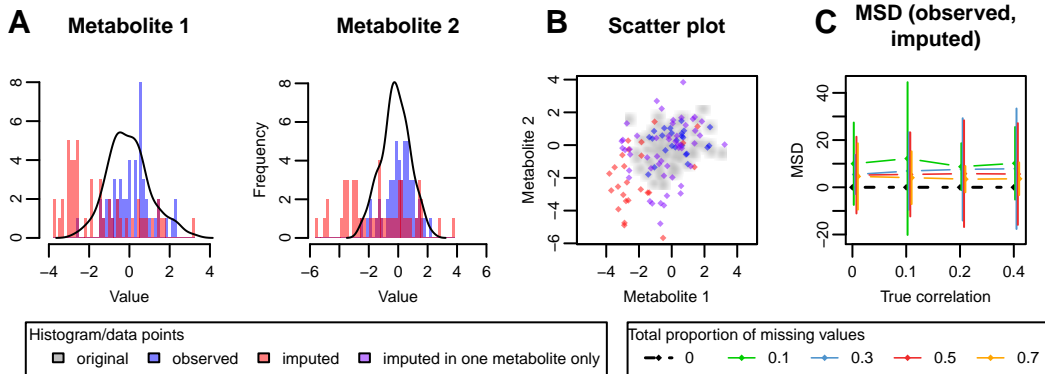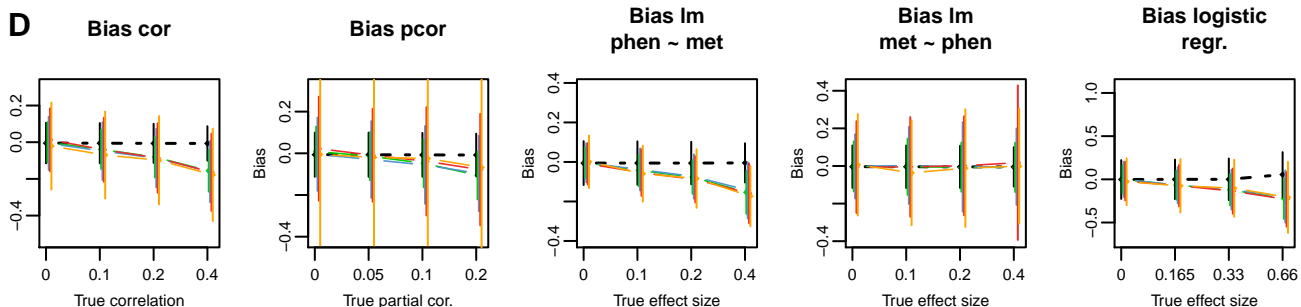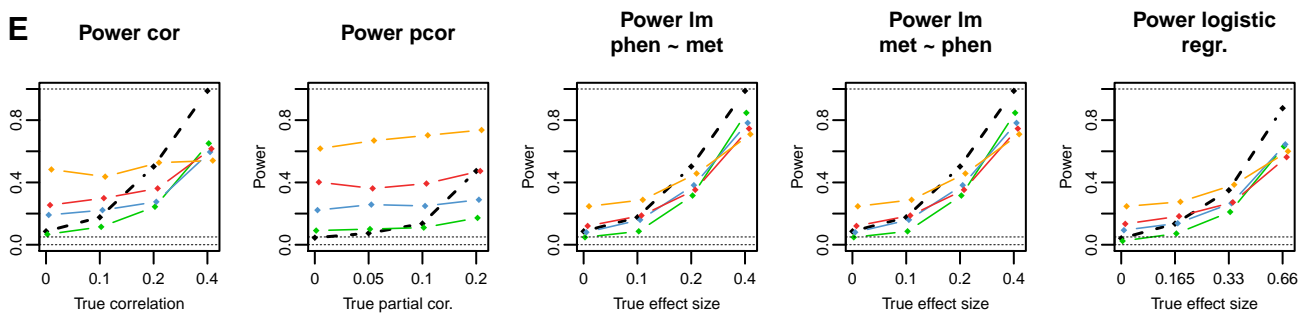

**A** Metabolite 1

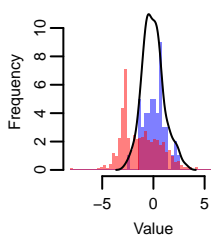

Metabolite 2

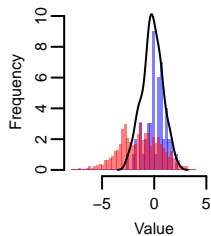

**B** Scatter plot

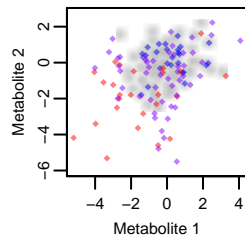

**C** MSD (observed, imputed)

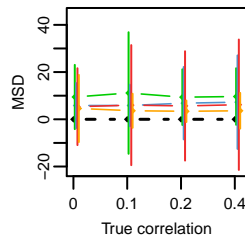

Histogram/data points  
 ■ original   ■ observed   ■ imputed   ■ imputed in one metabolite only

Total proportion of missing values  
 - - 0   - - 0.1   - - 0.3   - - 0.5   - - 0.7

**D** Bias cor

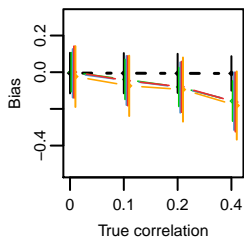

Bias pcor

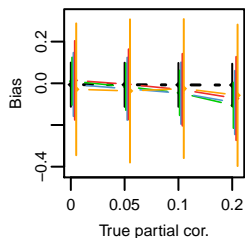

Bias Im phen ~ met

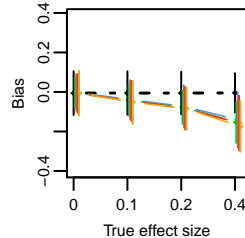

Bias Im met ~ phen

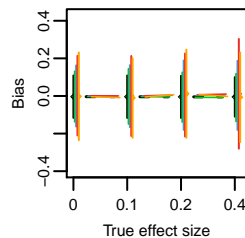

Bias logistic regr.

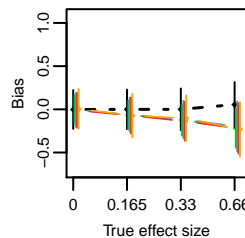

**E** Power cor

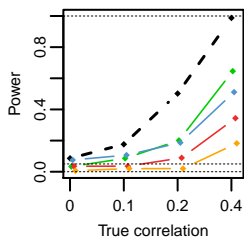

Power pcor

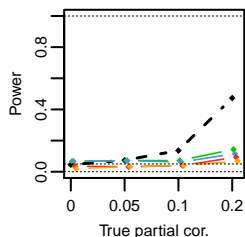

Power Im phen ~ met

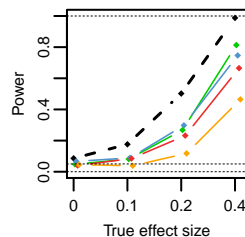

Power Im met ~ phen

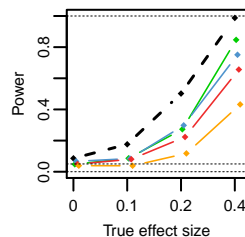

Power logistic regr.

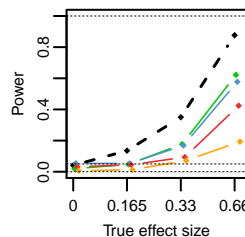

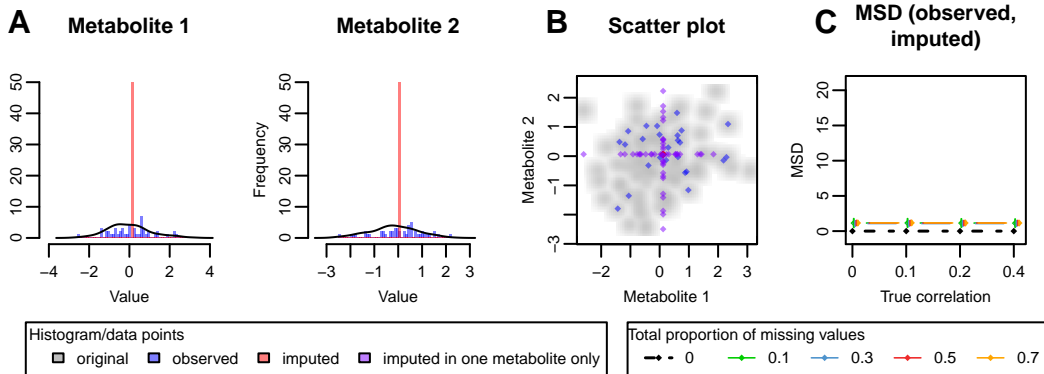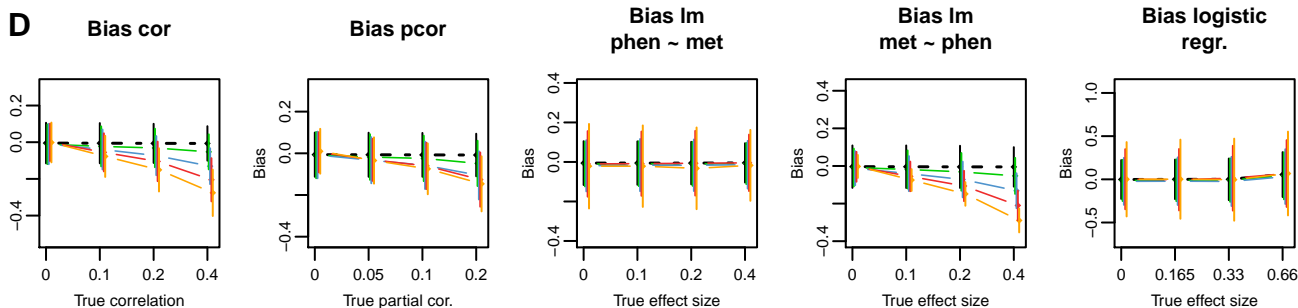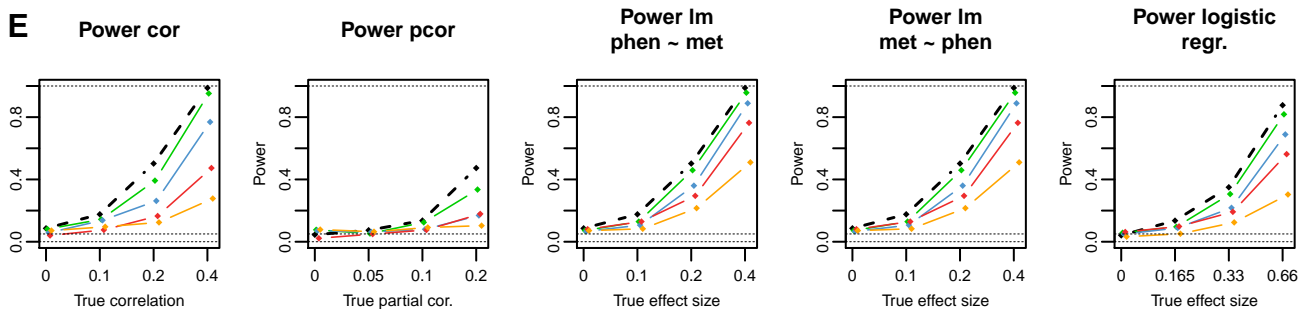

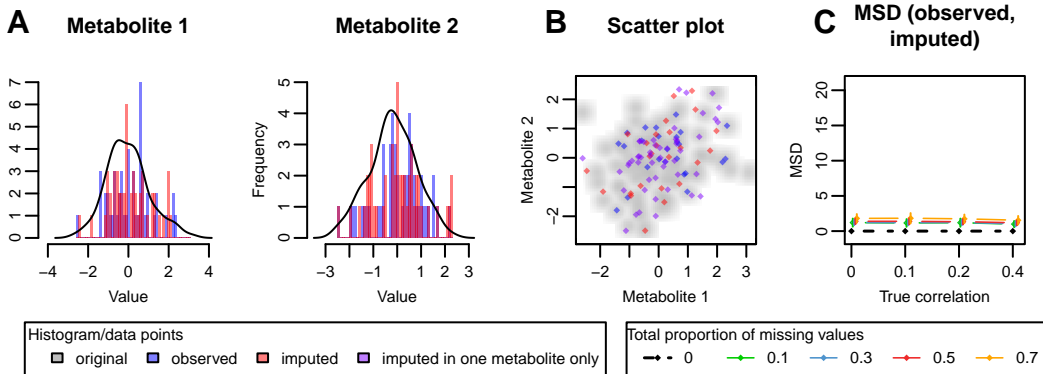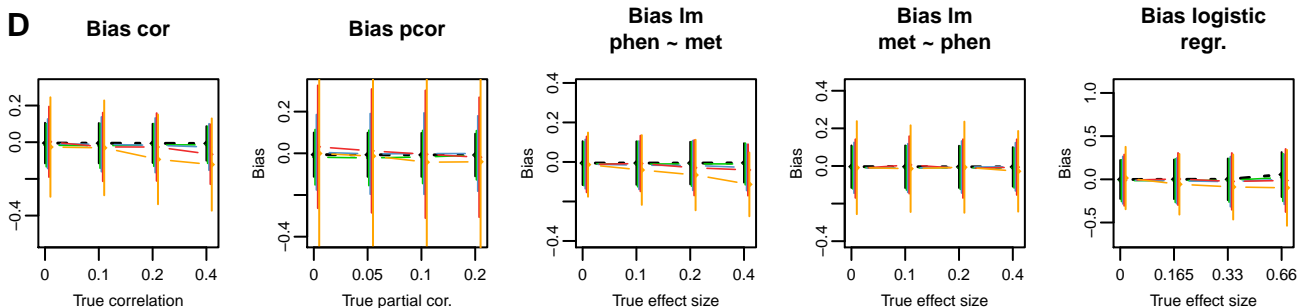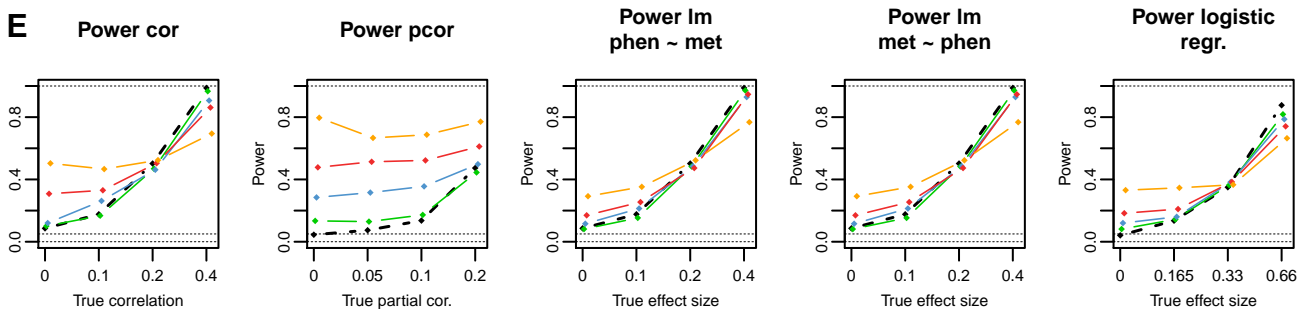

**A** Metabolite 1

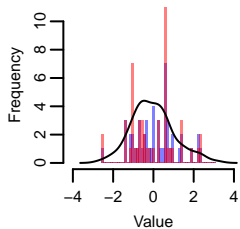

Metabolite 2

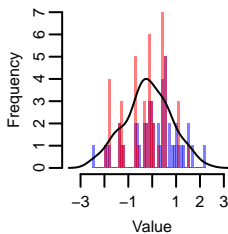

**B** Scatter plot

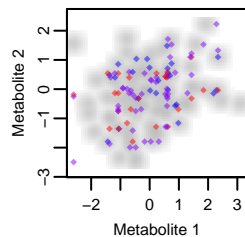

**C** MSD (observed, imputed)

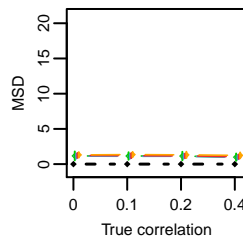

Histogram/data points

original observed imputed imputed in one metabolite only

Total proportion of missing values

0 0.1 0.3 0.5 0.7

**D** Bias cor

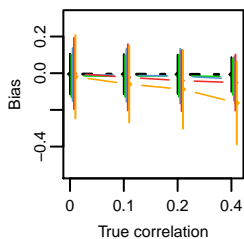

Bias pcor

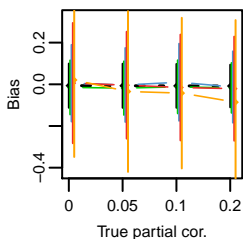

Bias lm phen ~ met

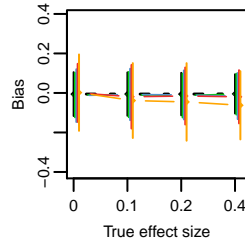

Bias lm met ~ phen

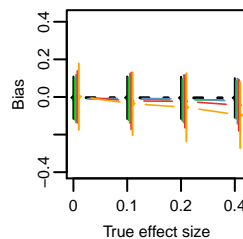

Bias logistic regr.

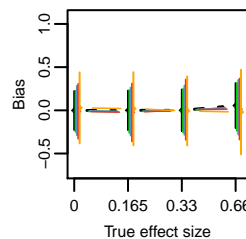

**E** Power cor

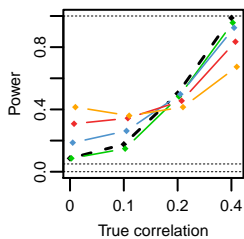

Power pcor

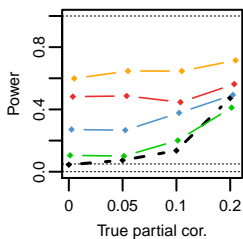

Power lm phen ~ met

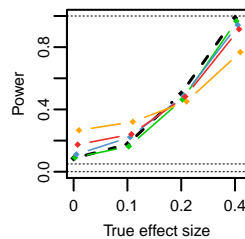

Power lm met ~ phen

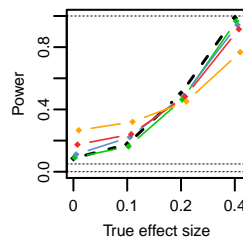

Power logistic regr.

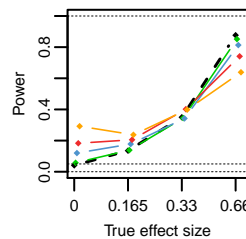

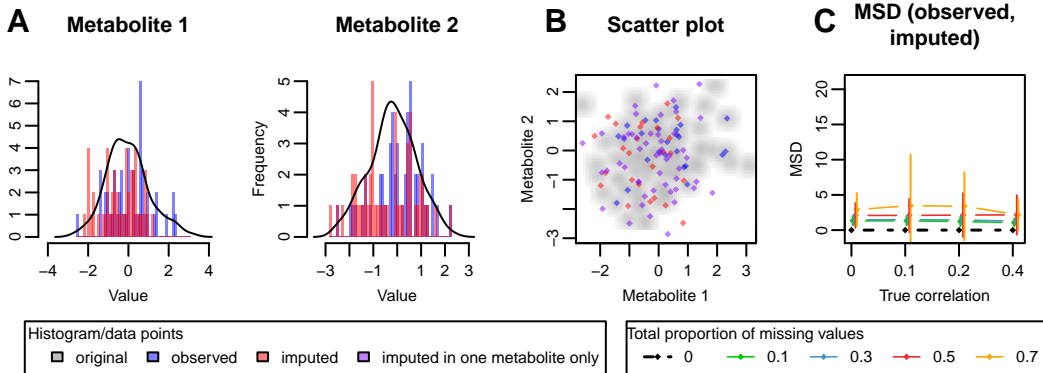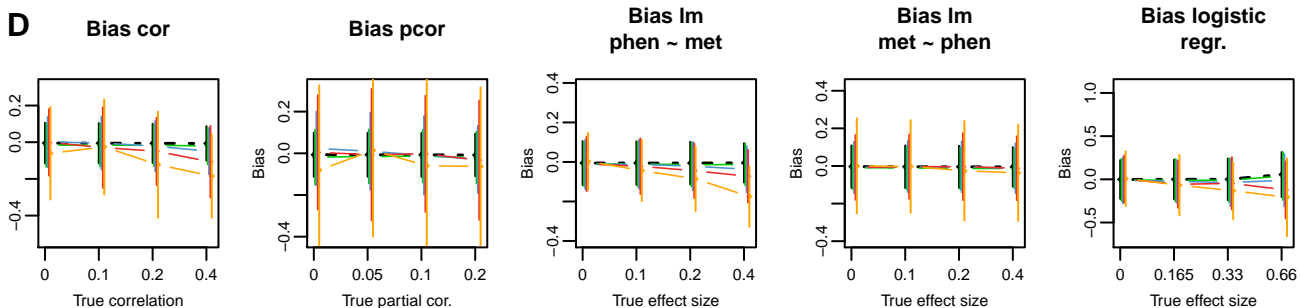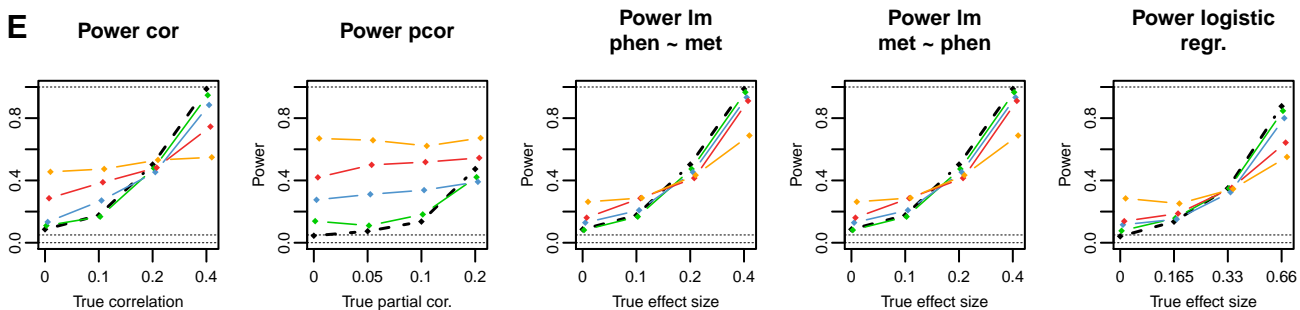

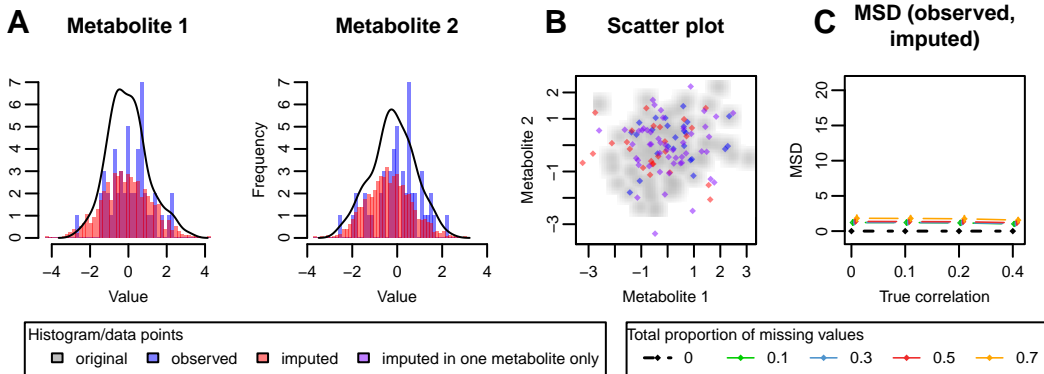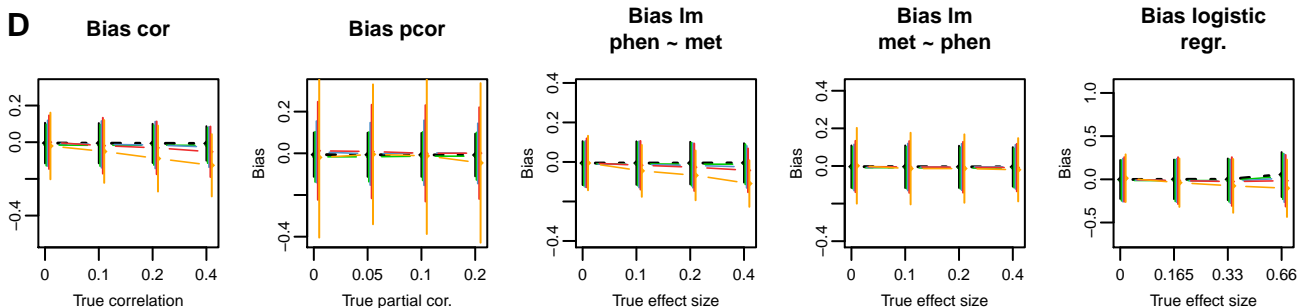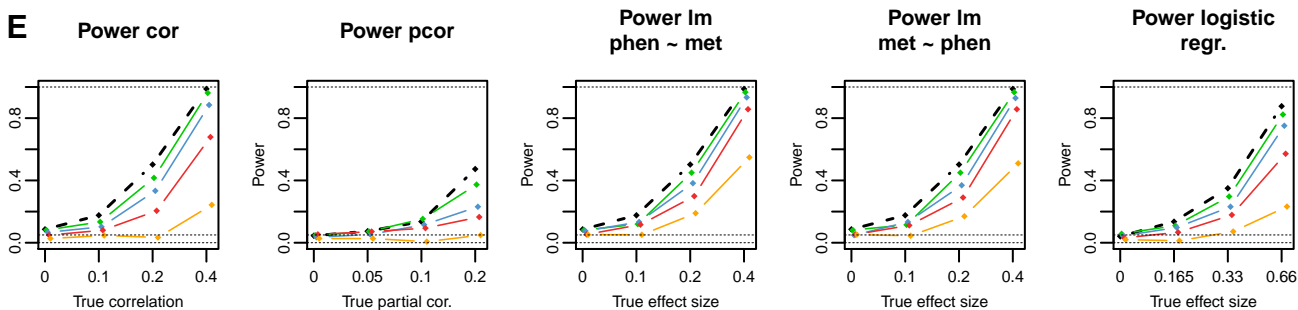



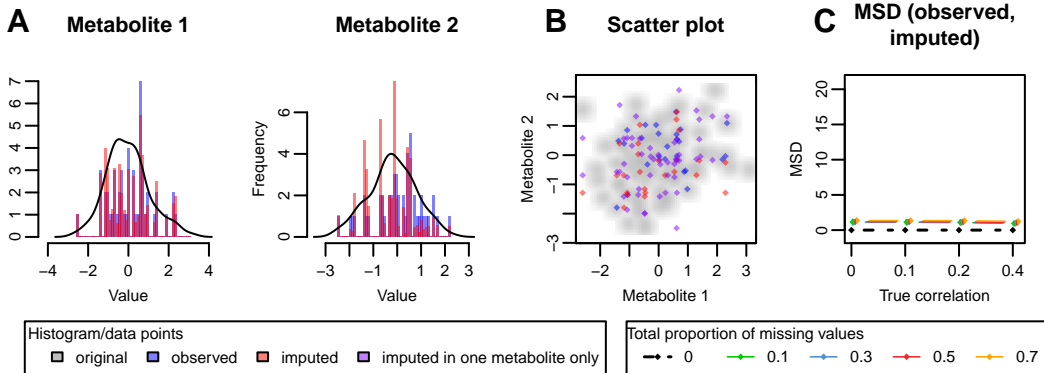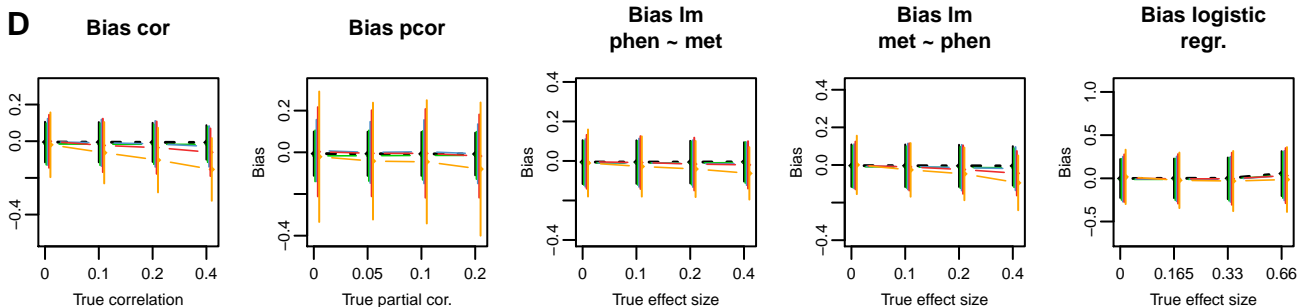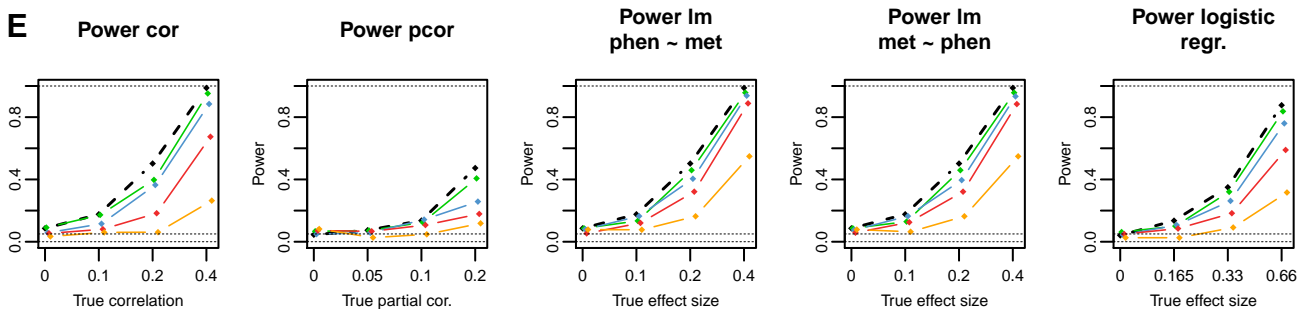

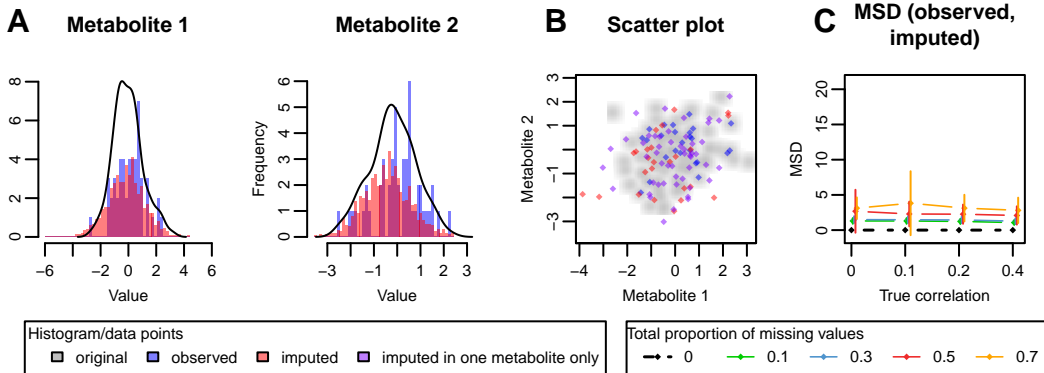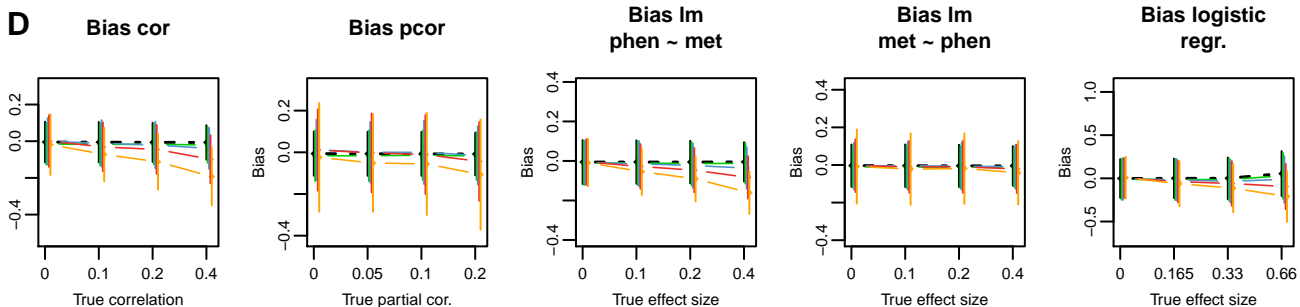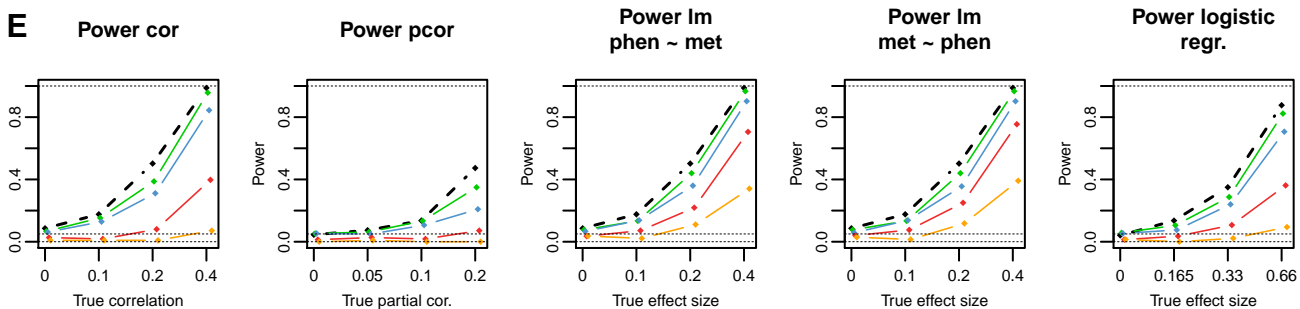

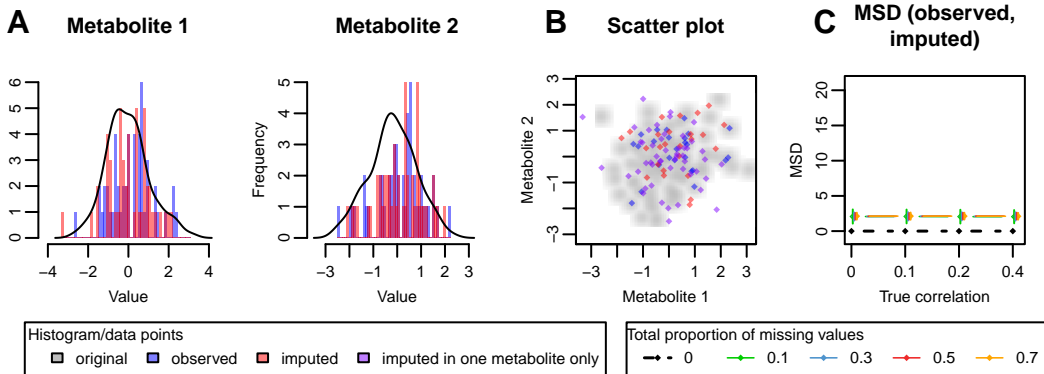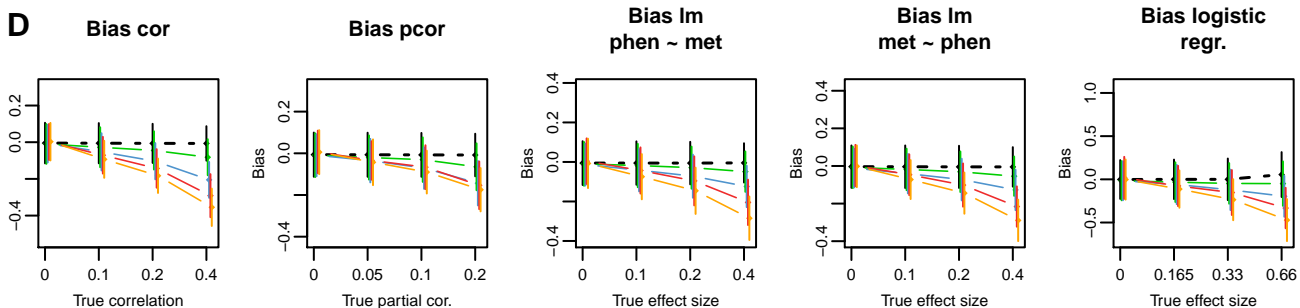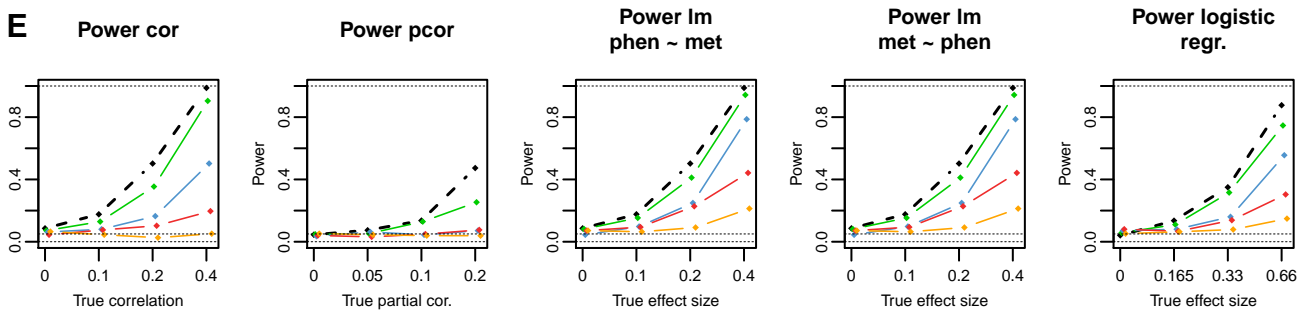

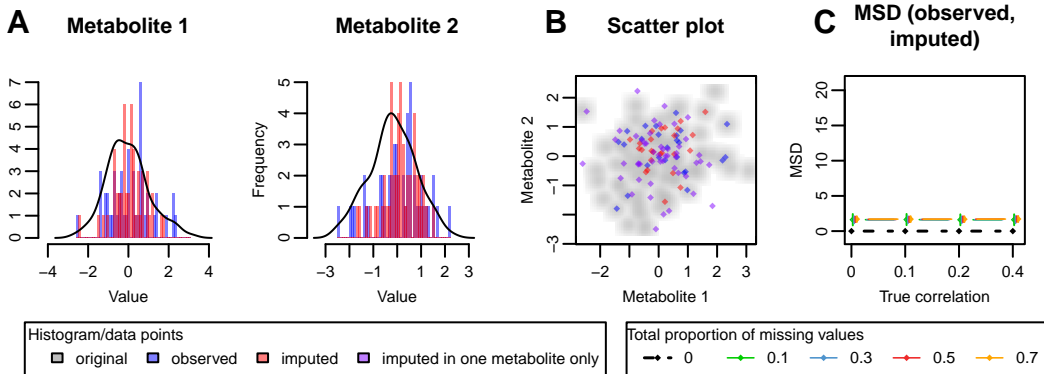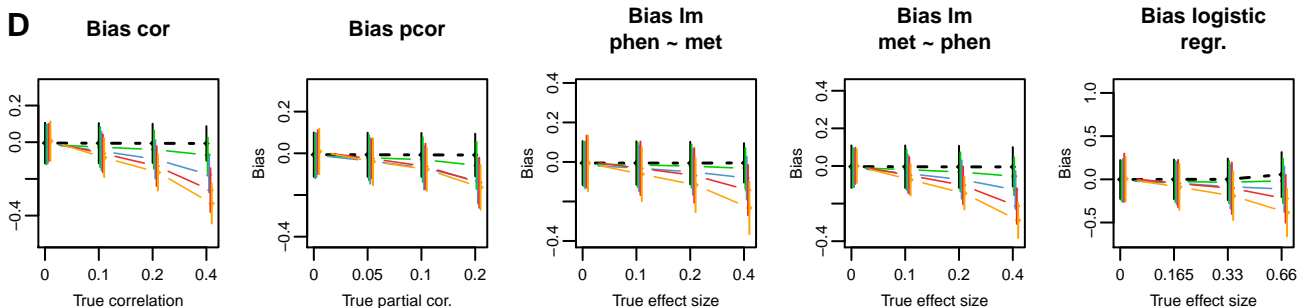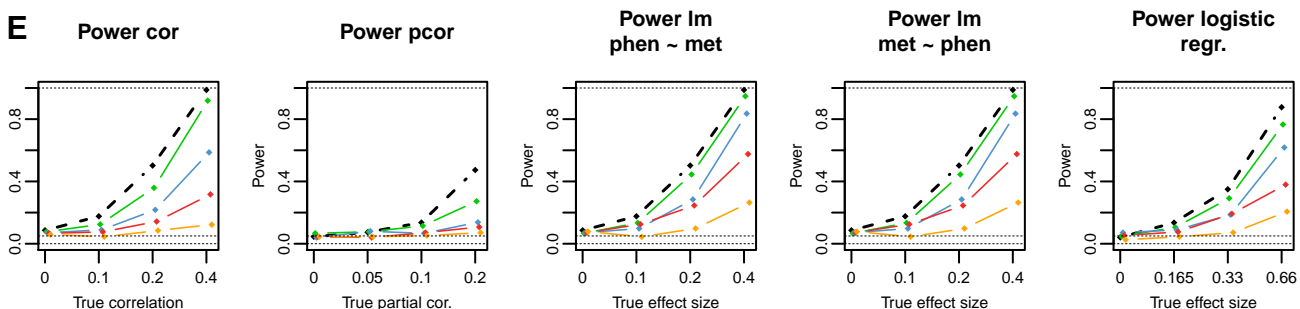

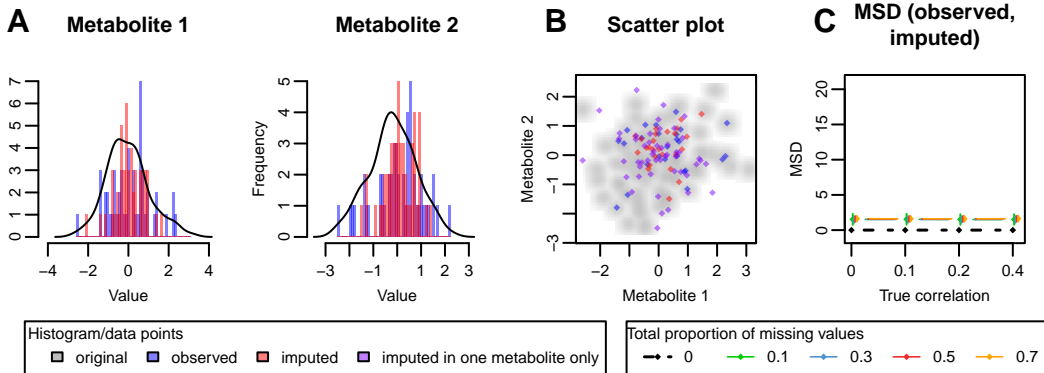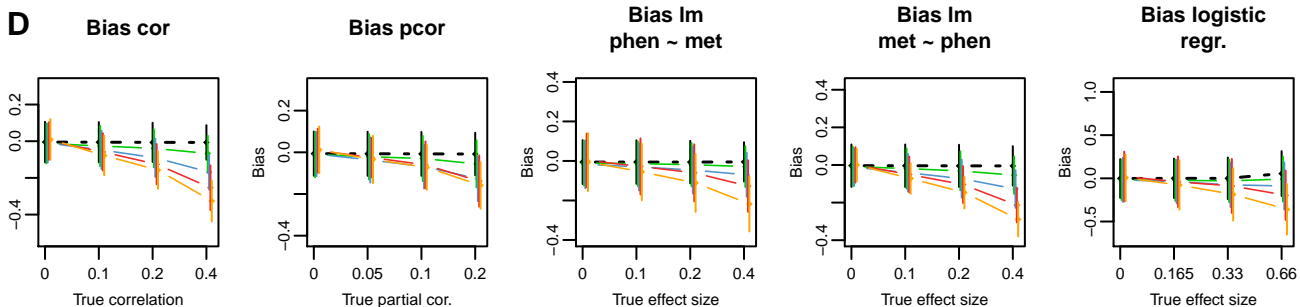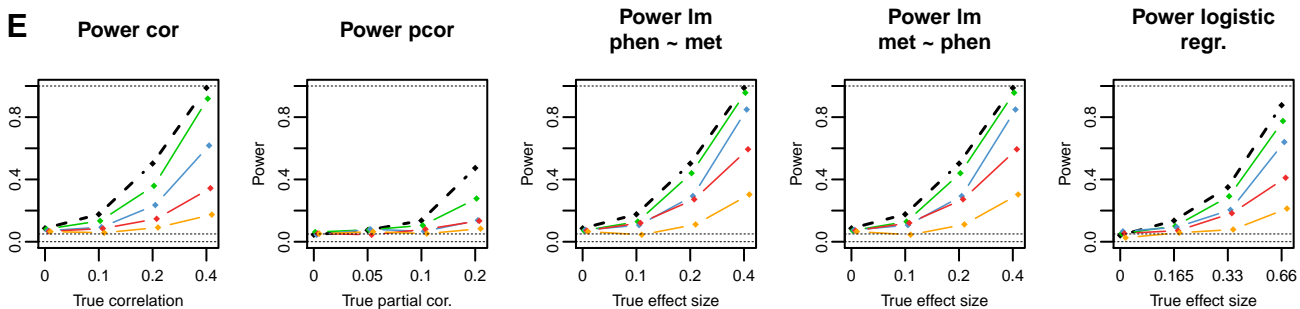

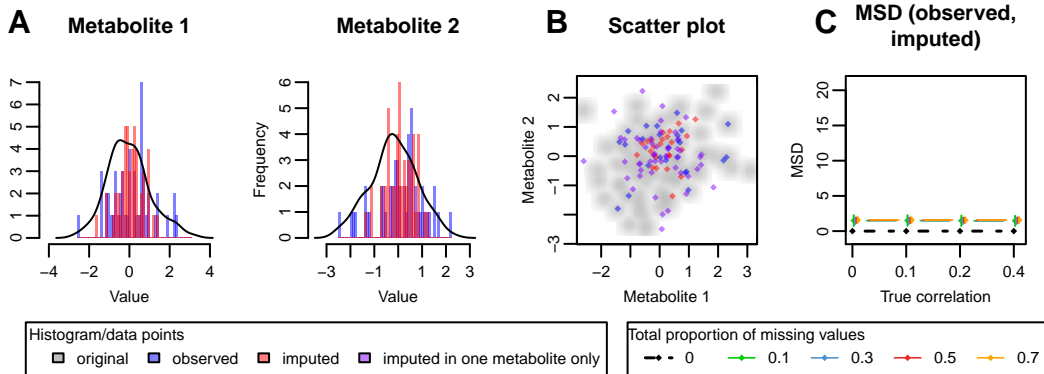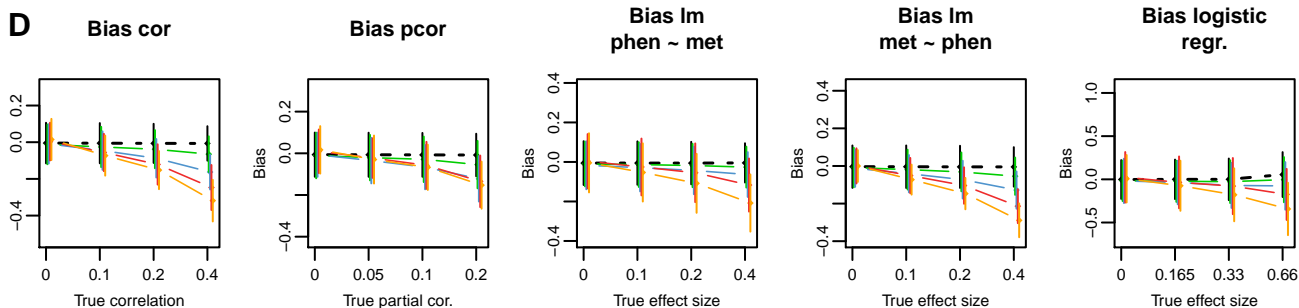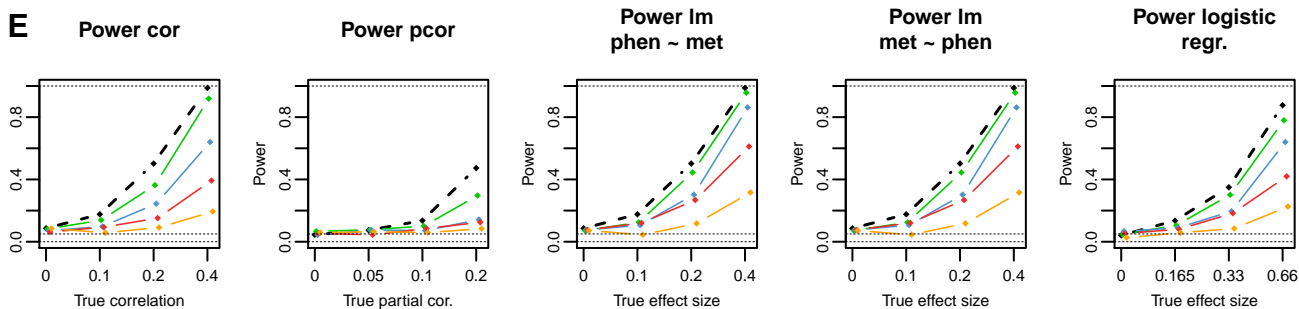

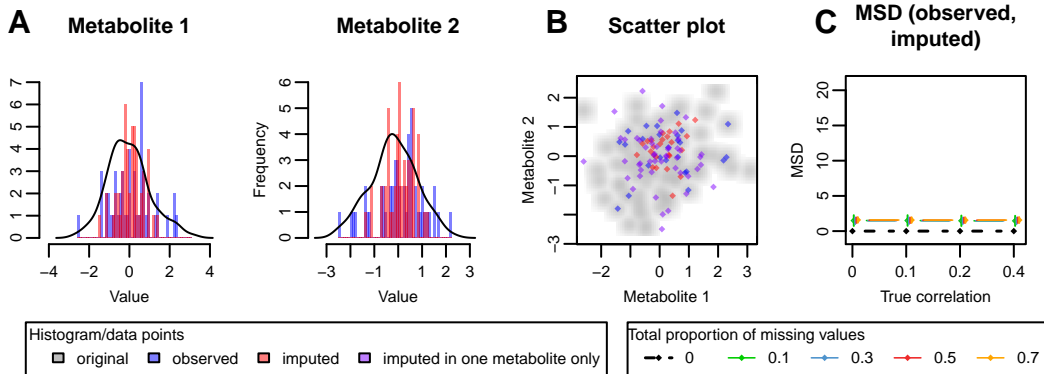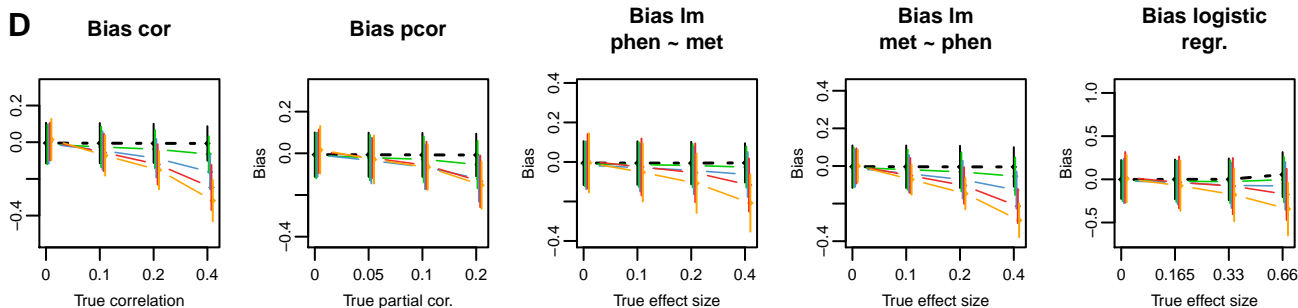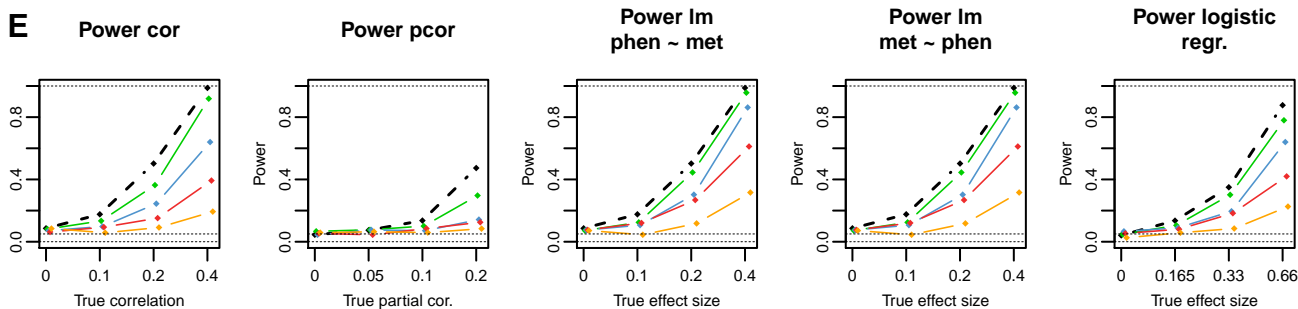

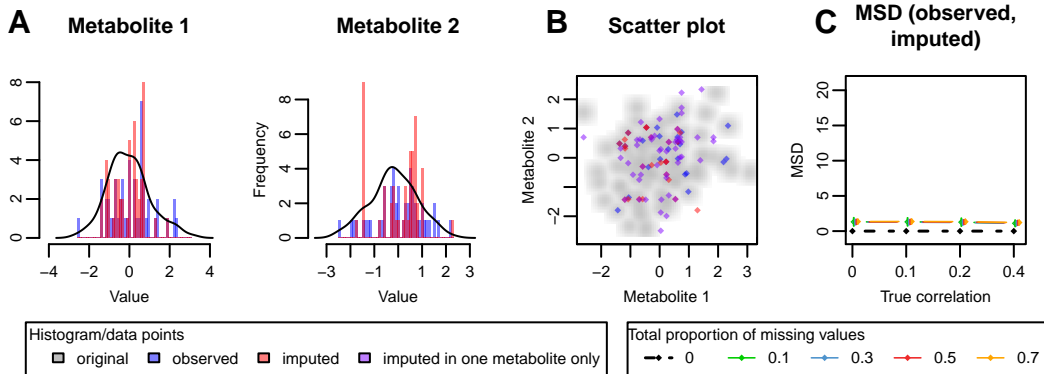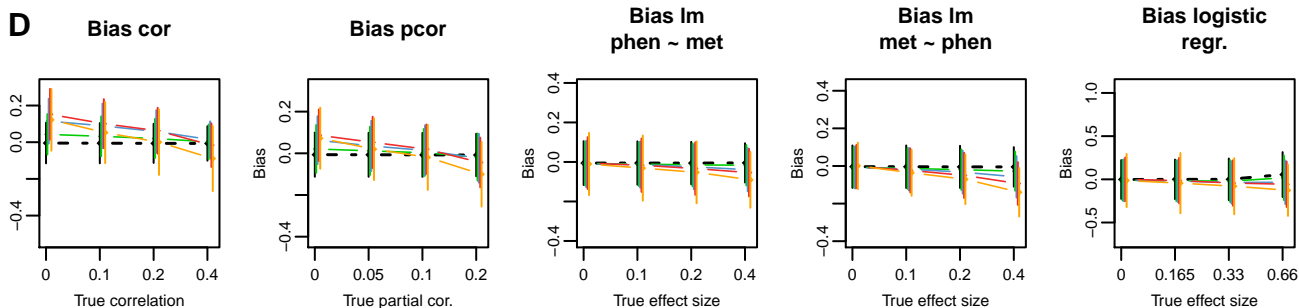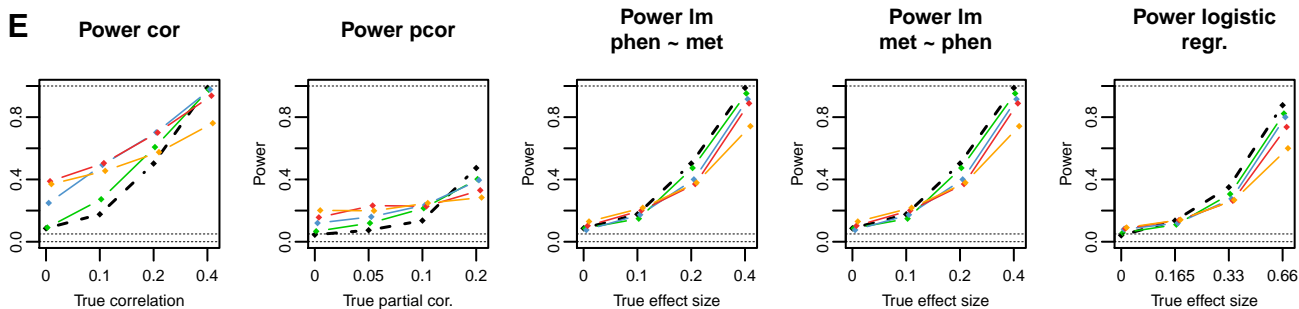



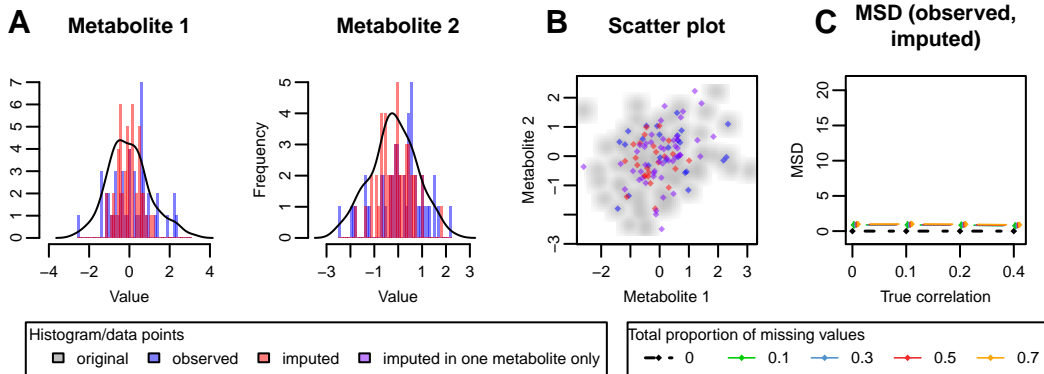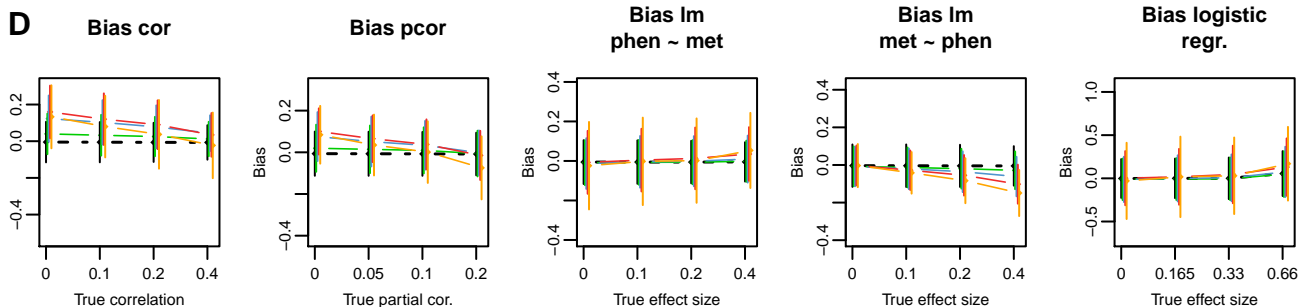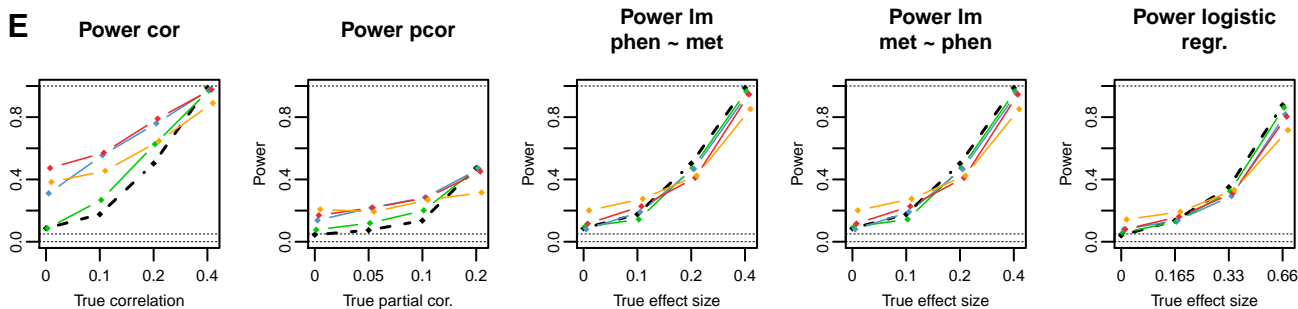

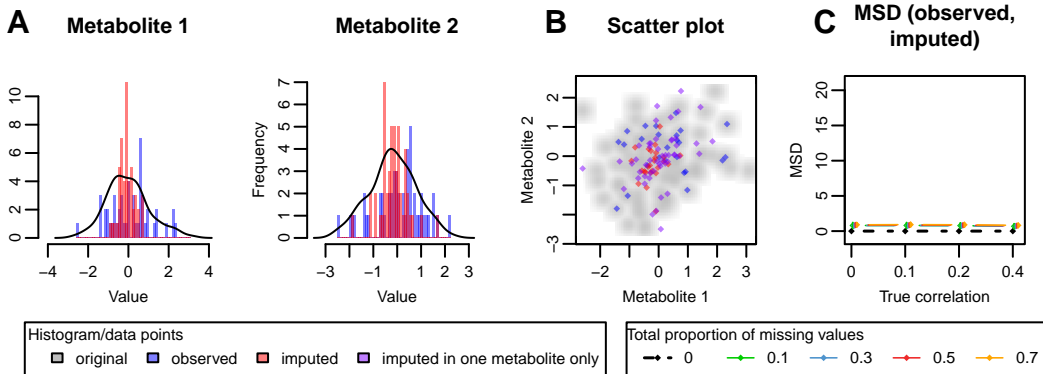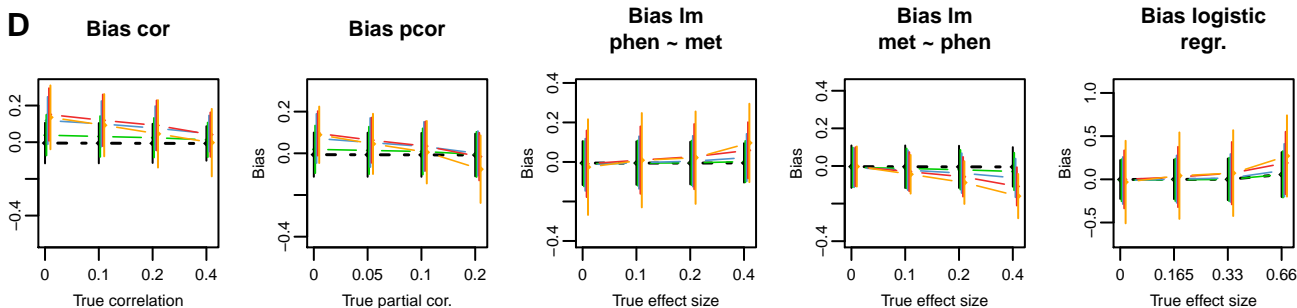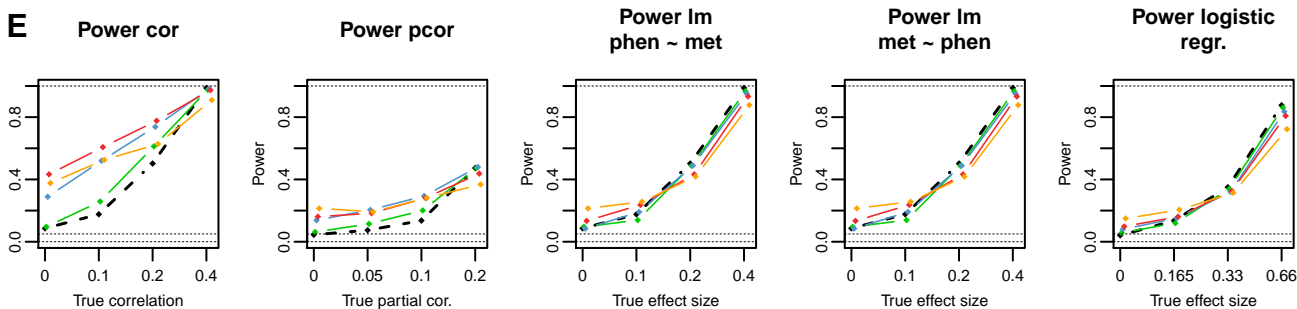

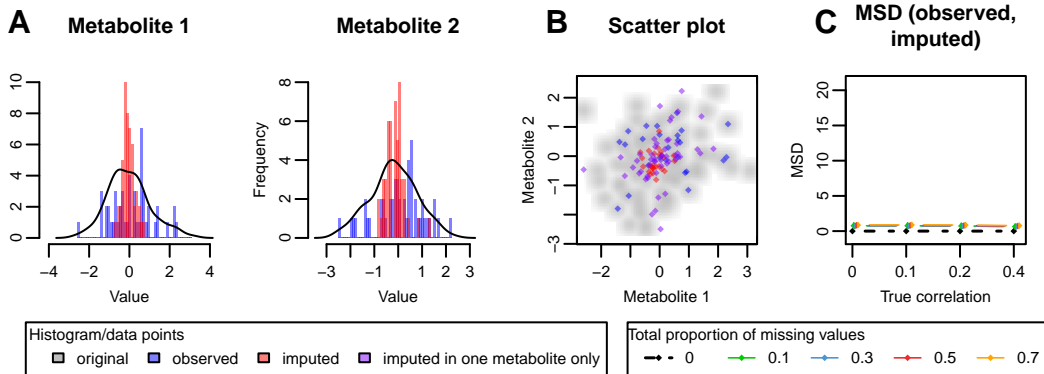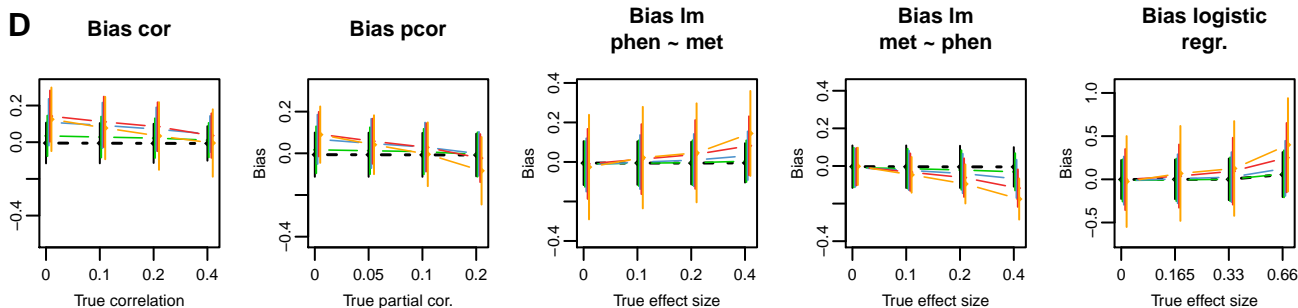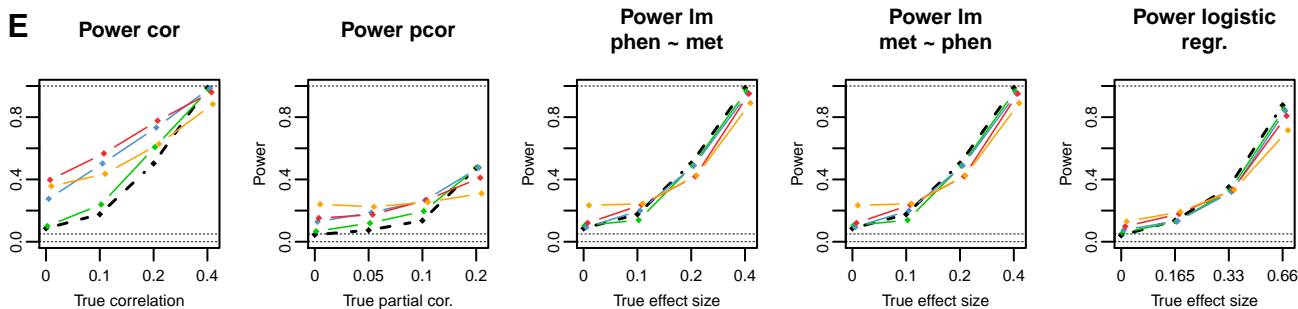

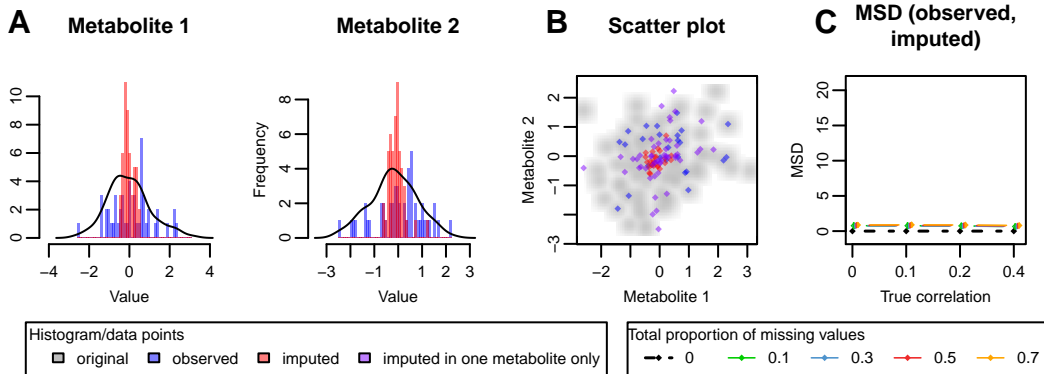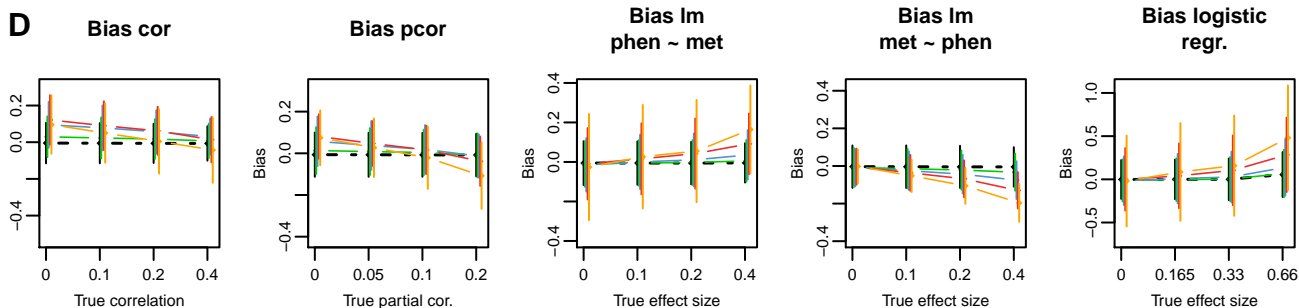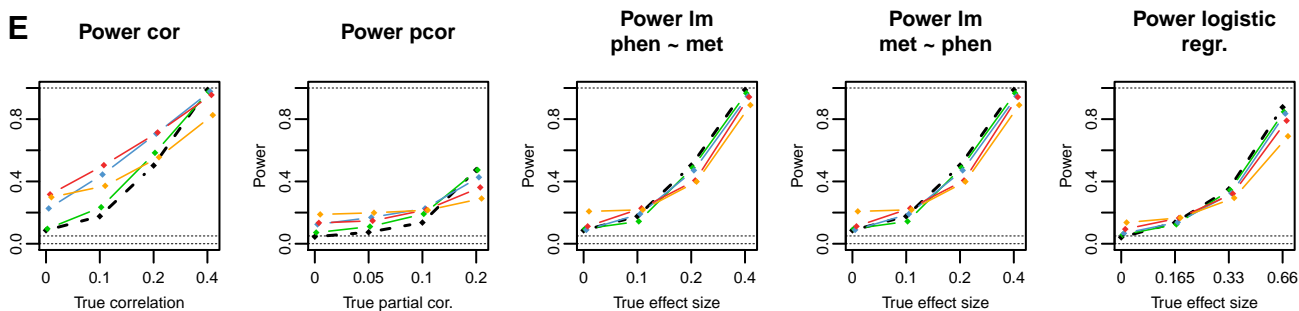

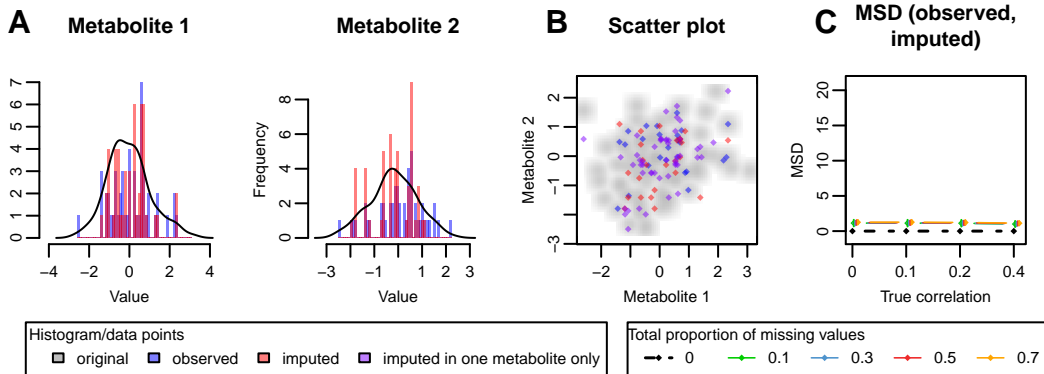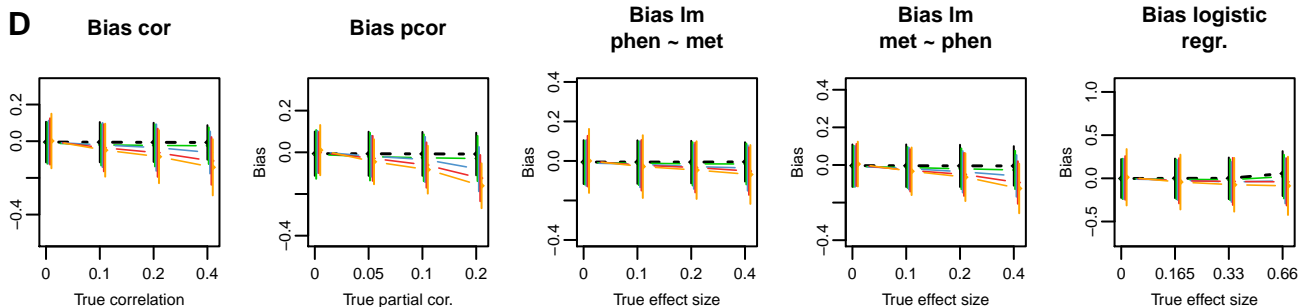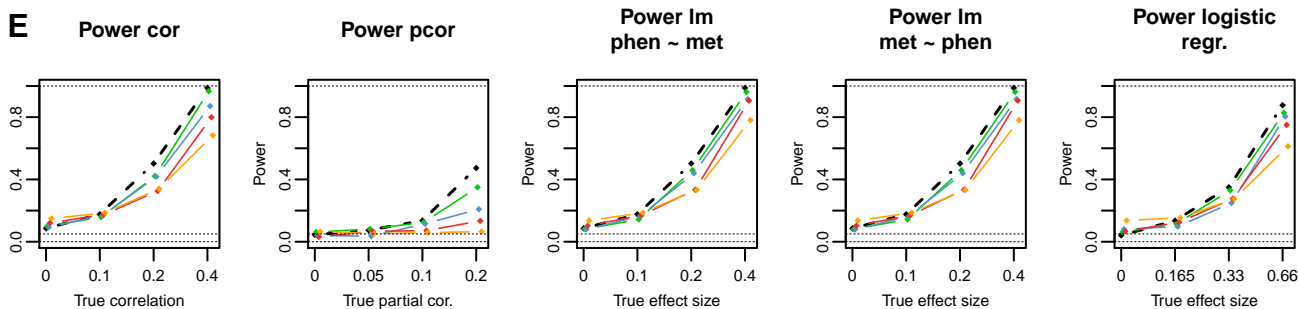

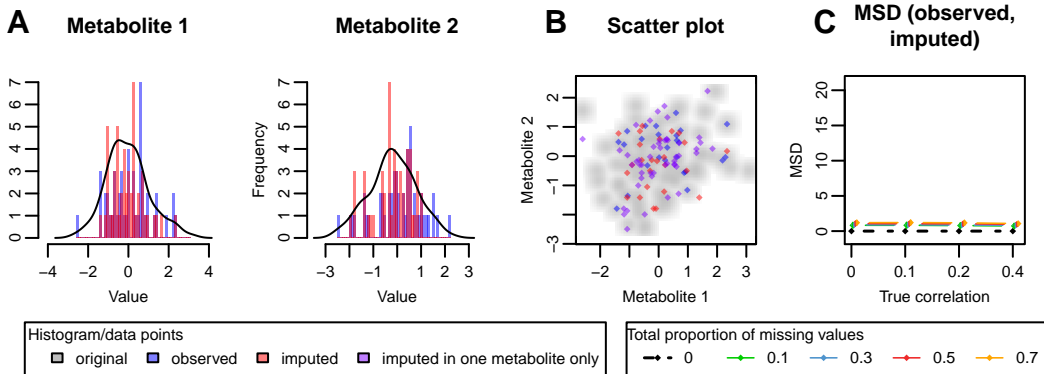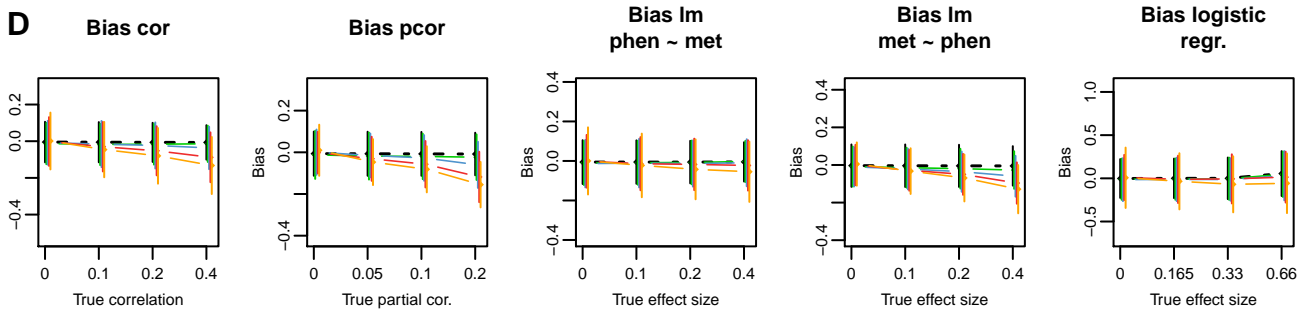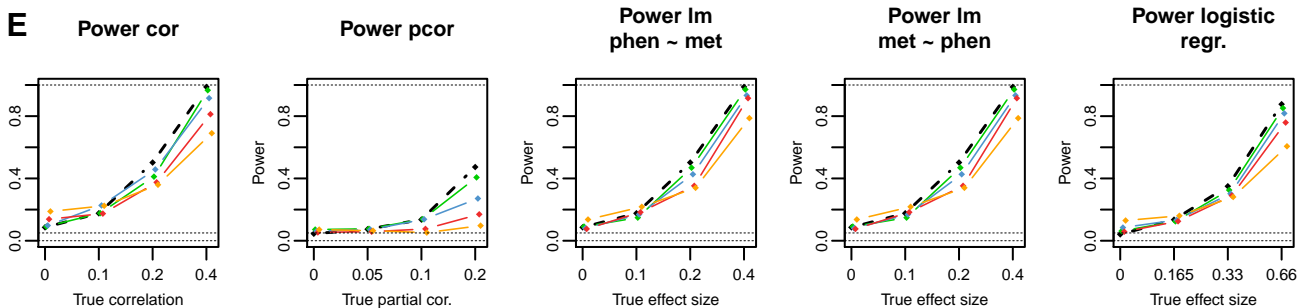

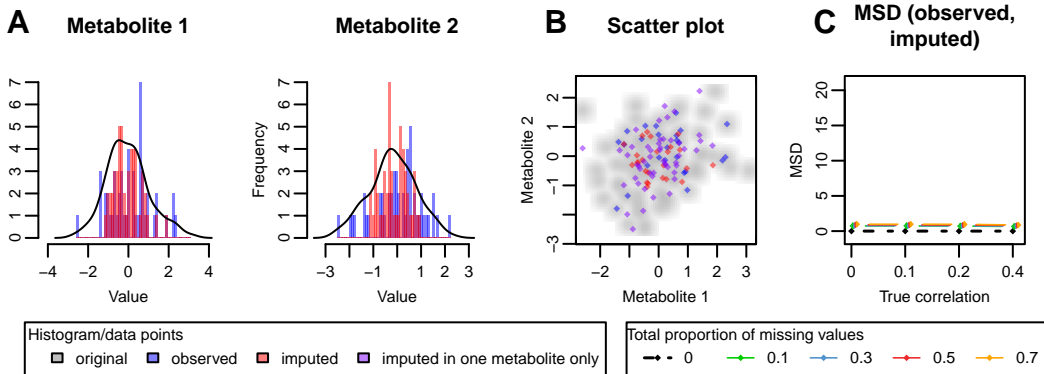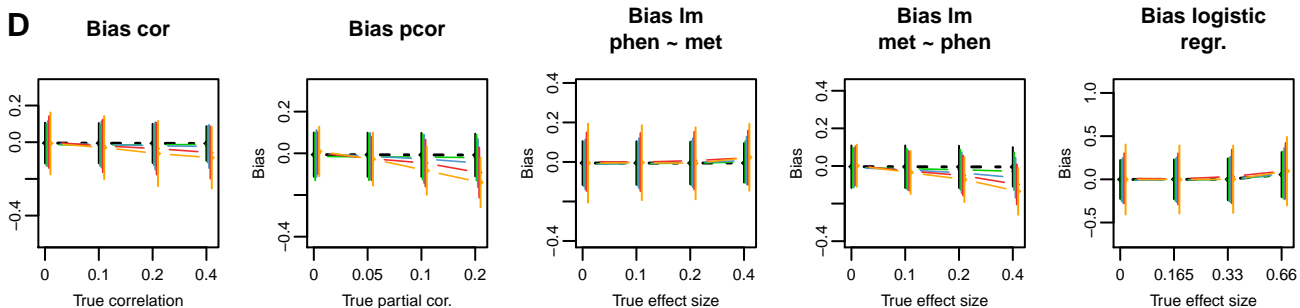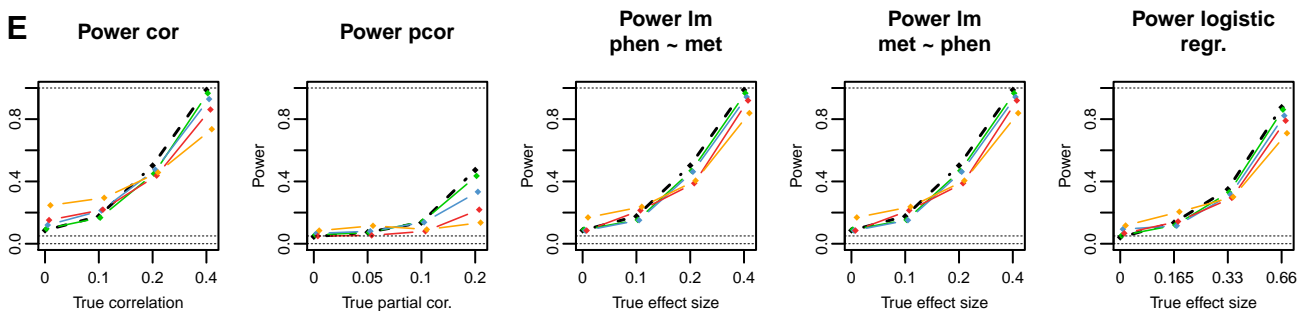

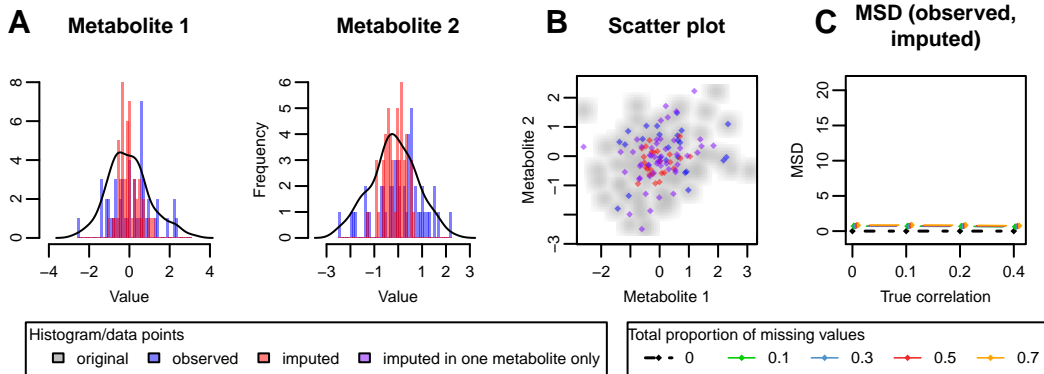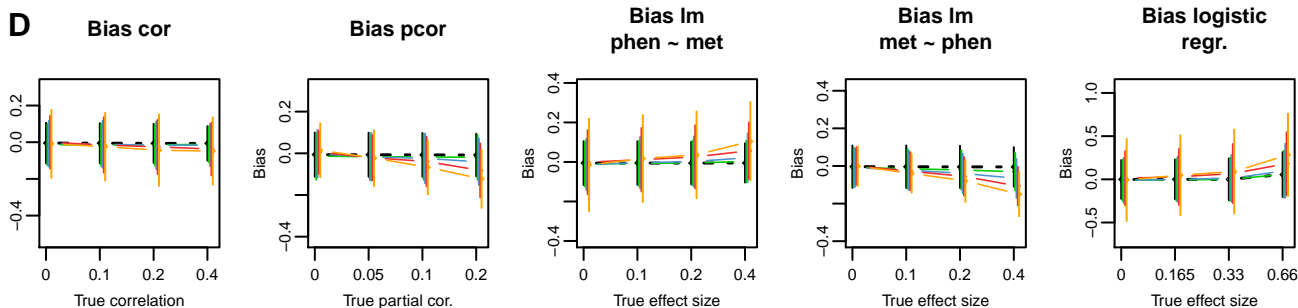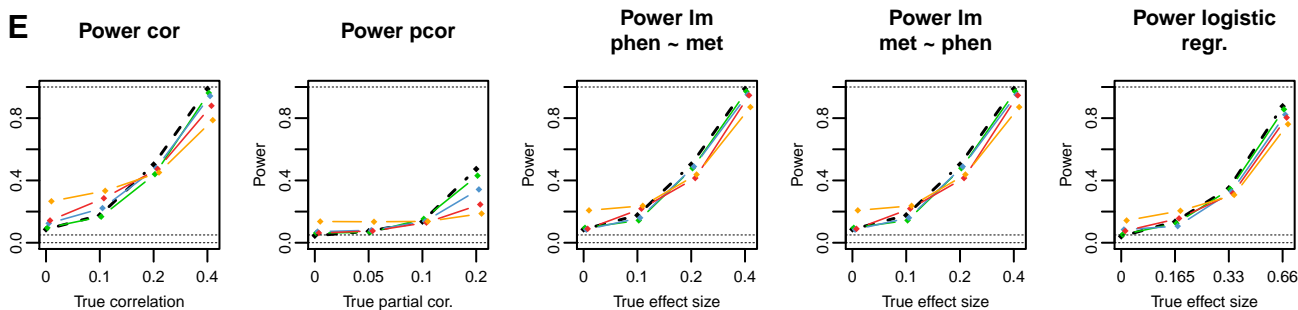



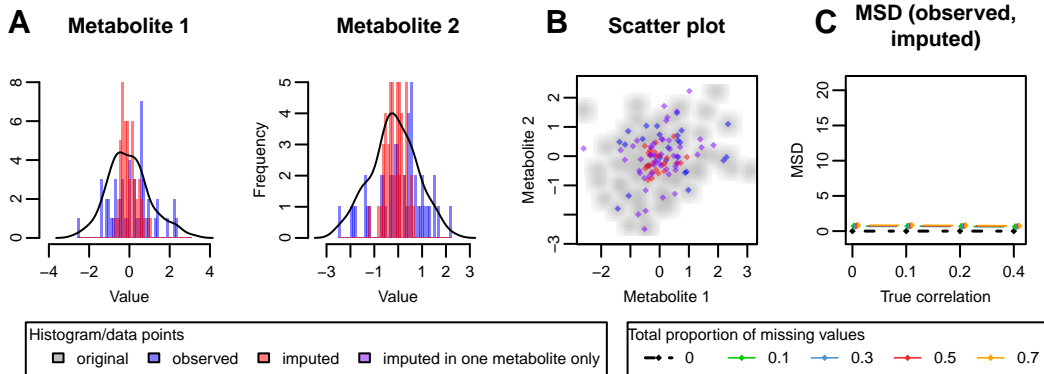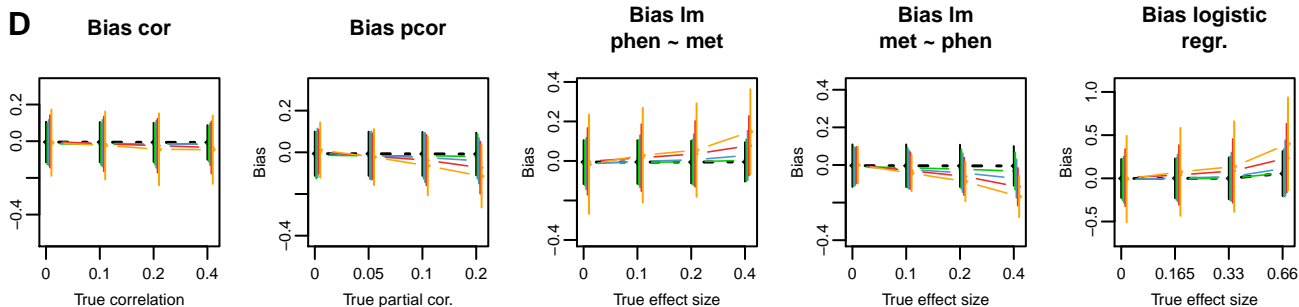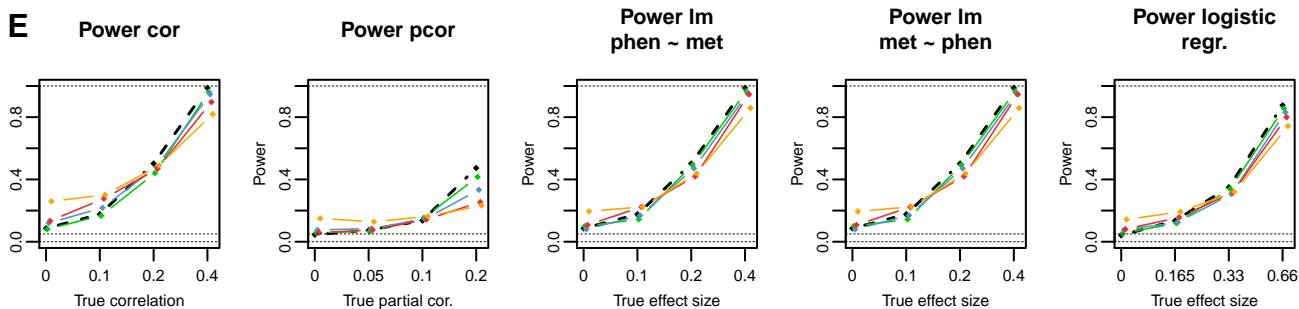

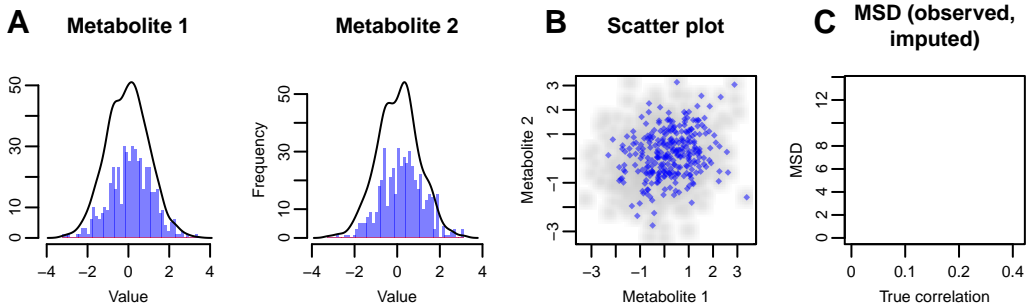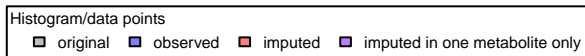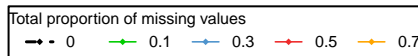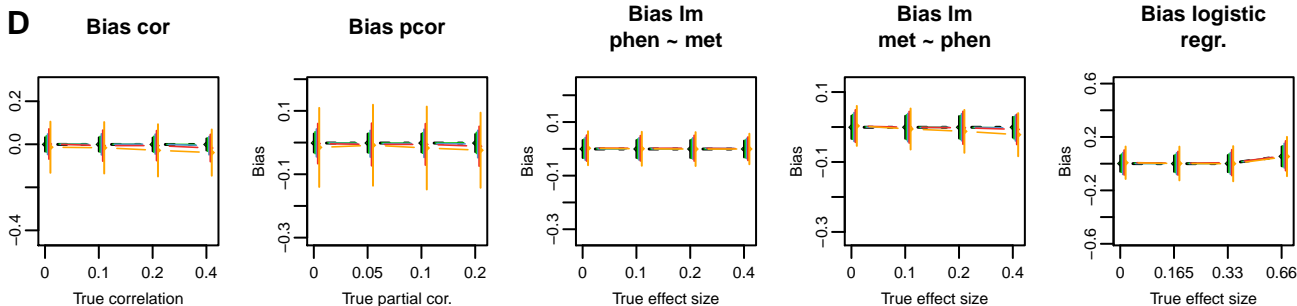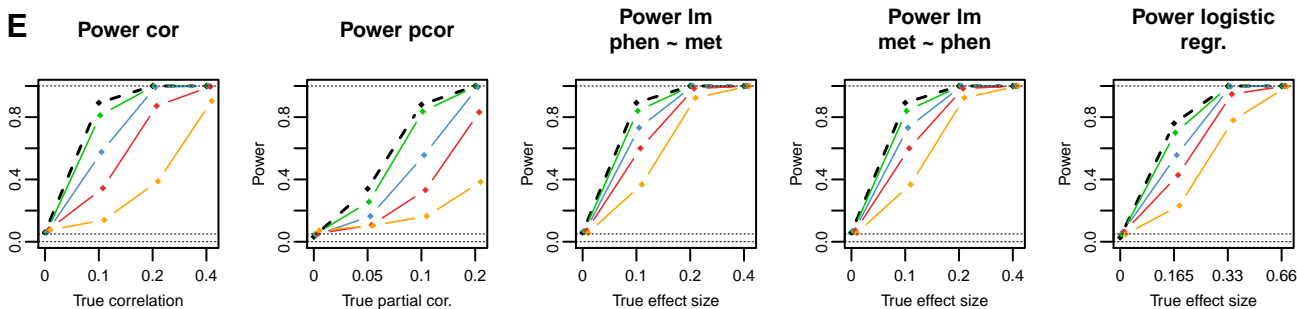

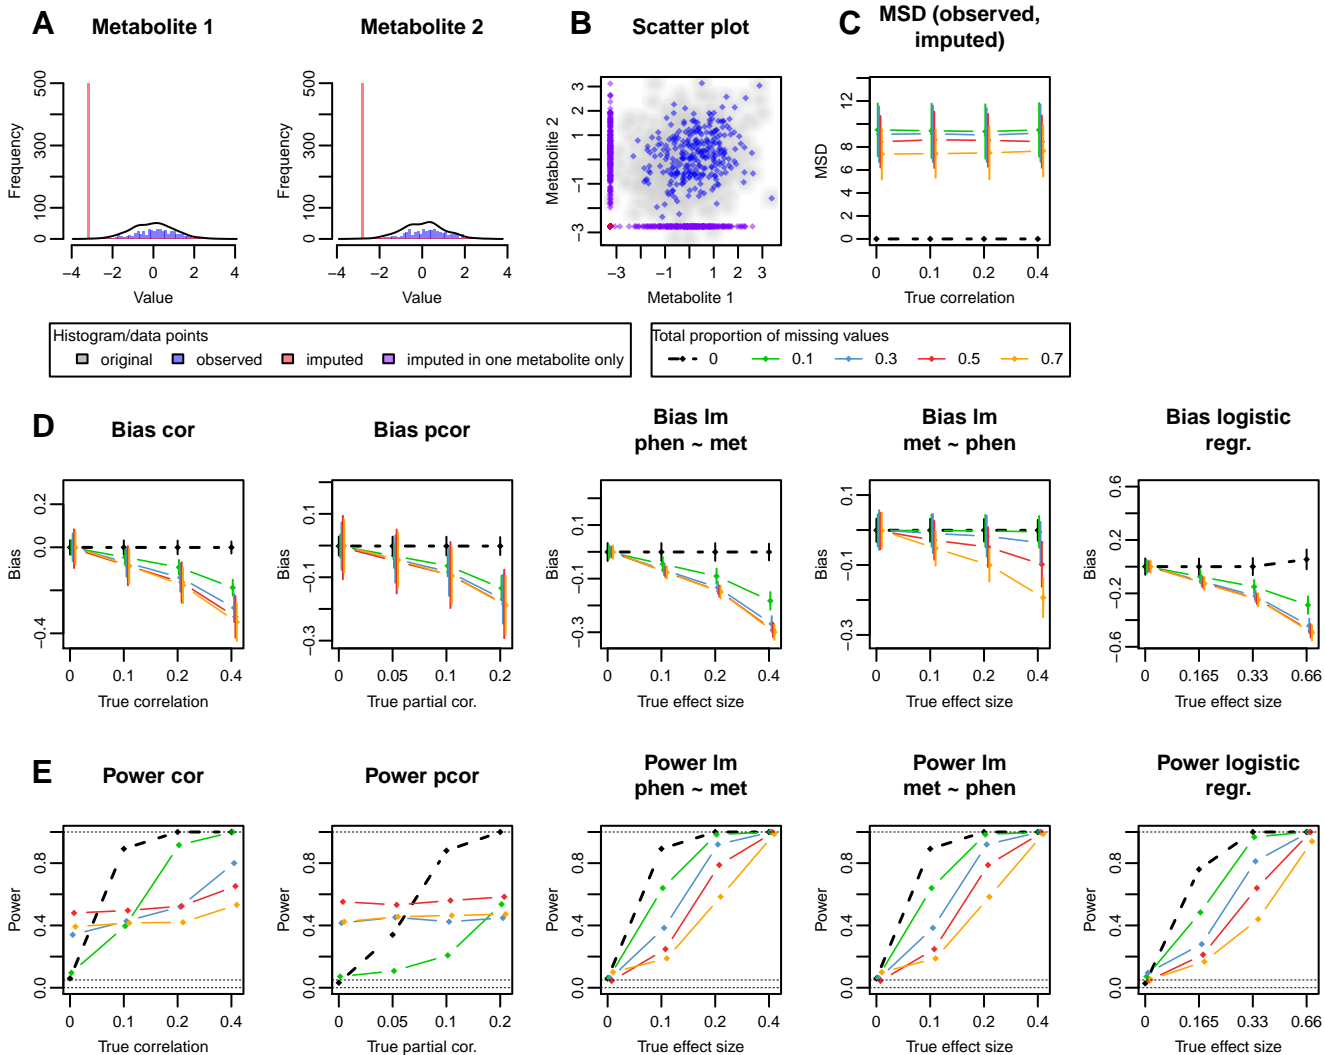

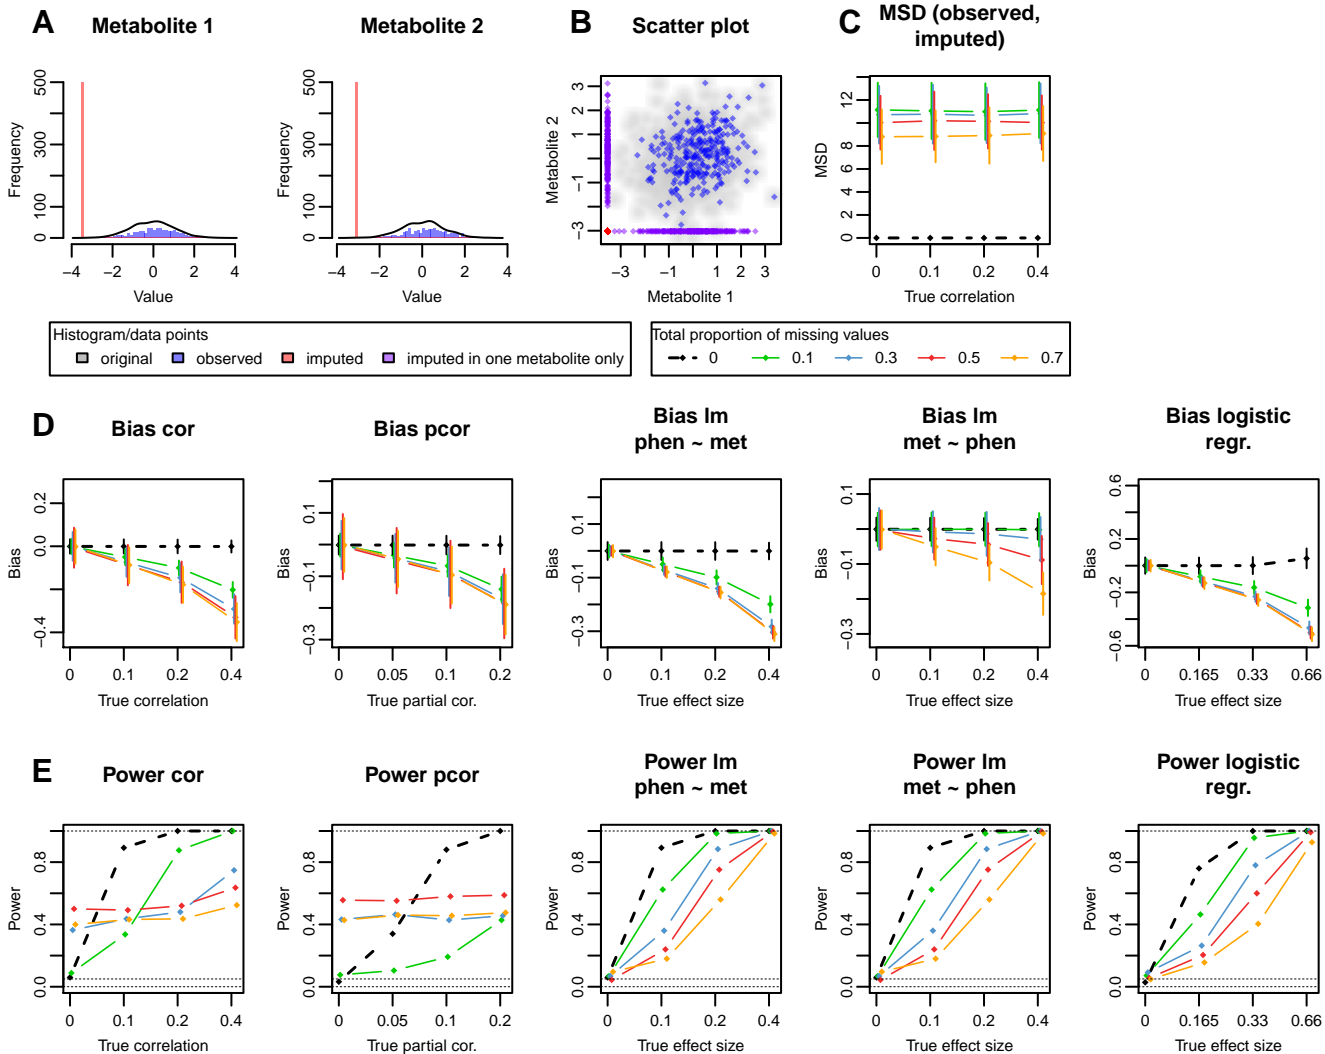

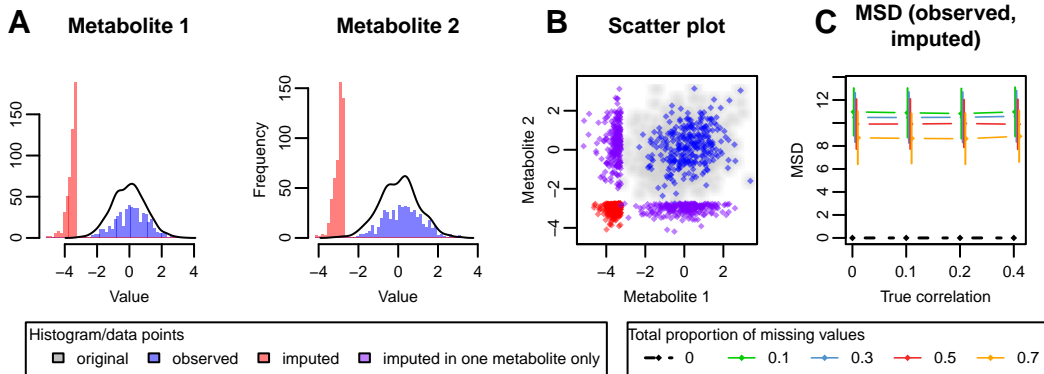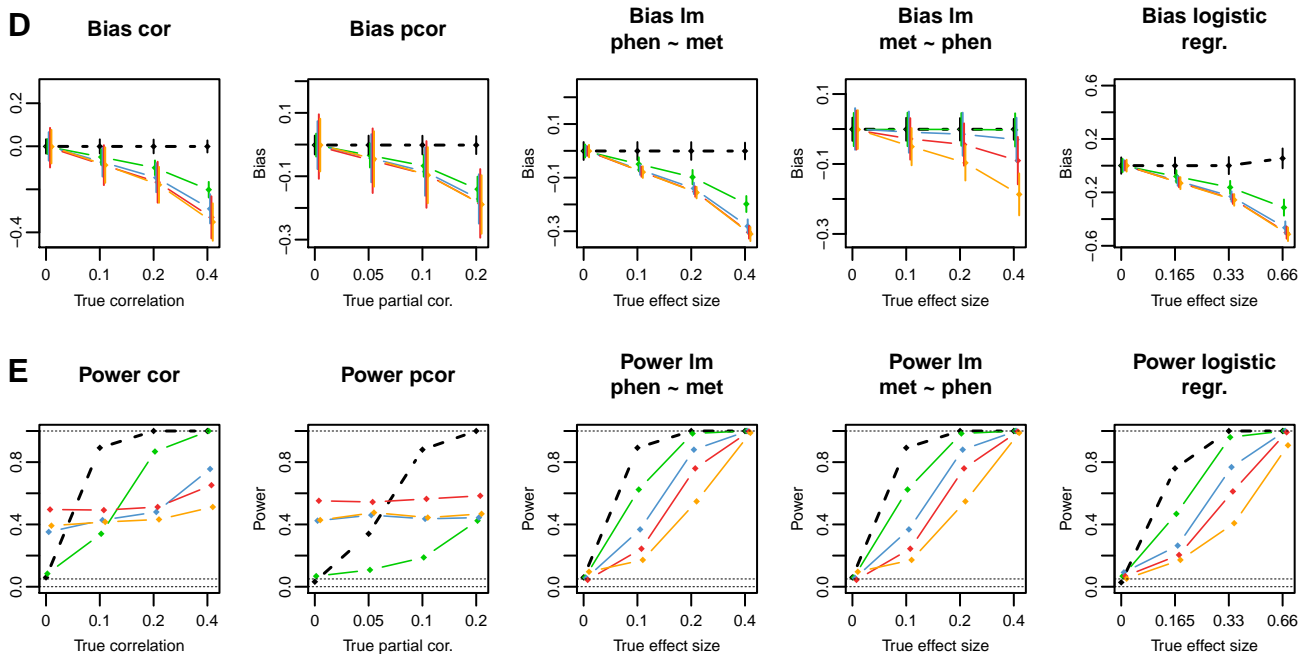

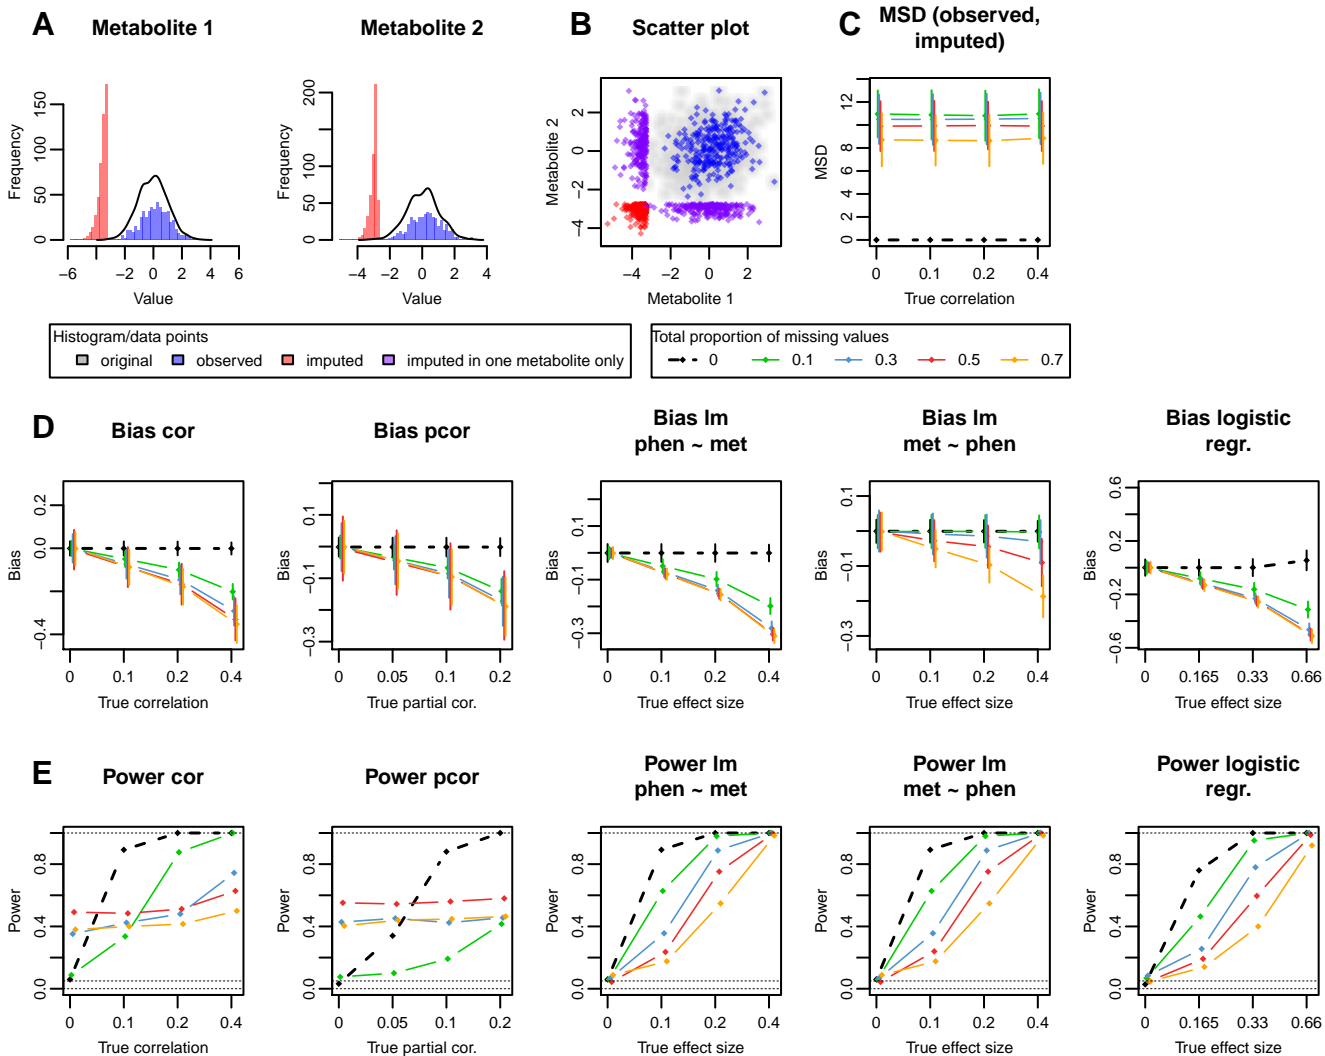

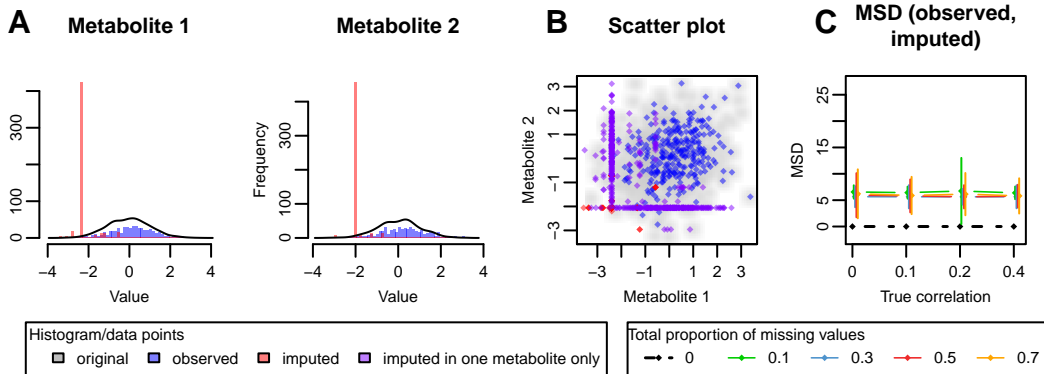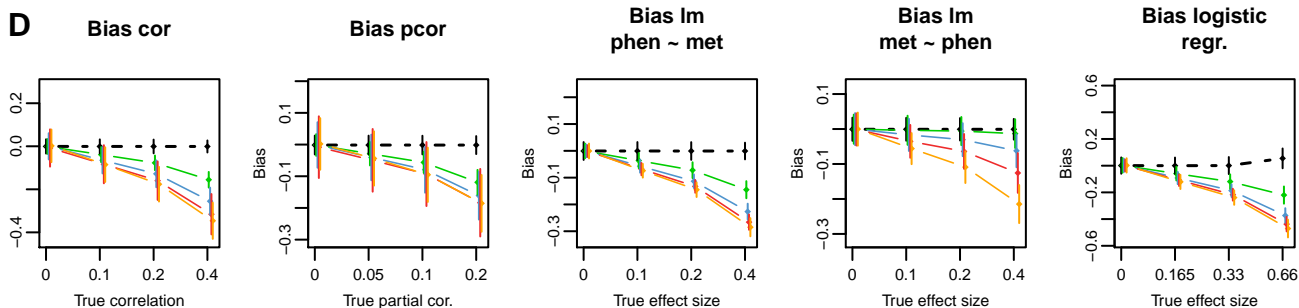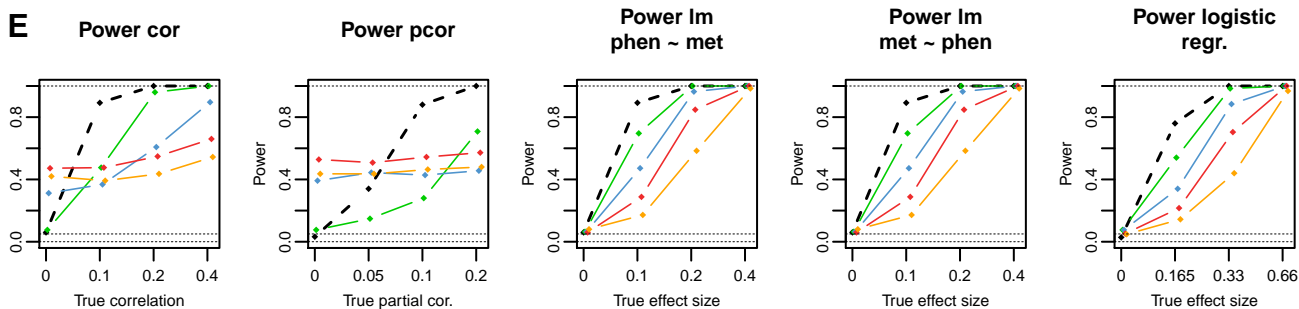

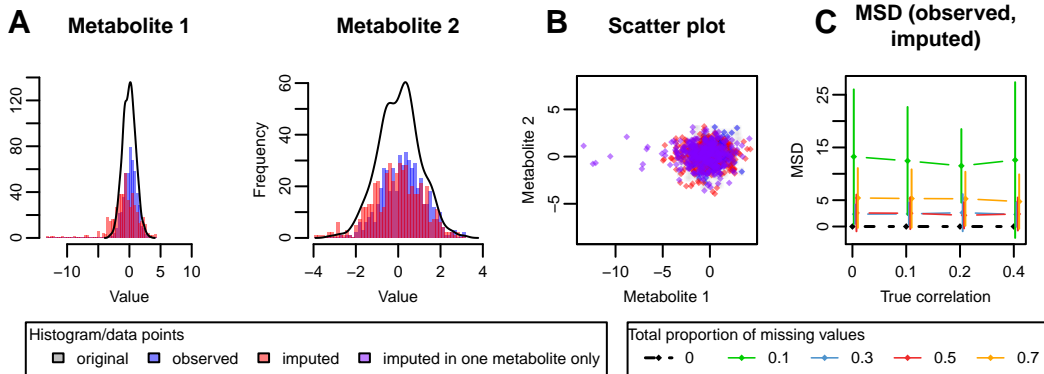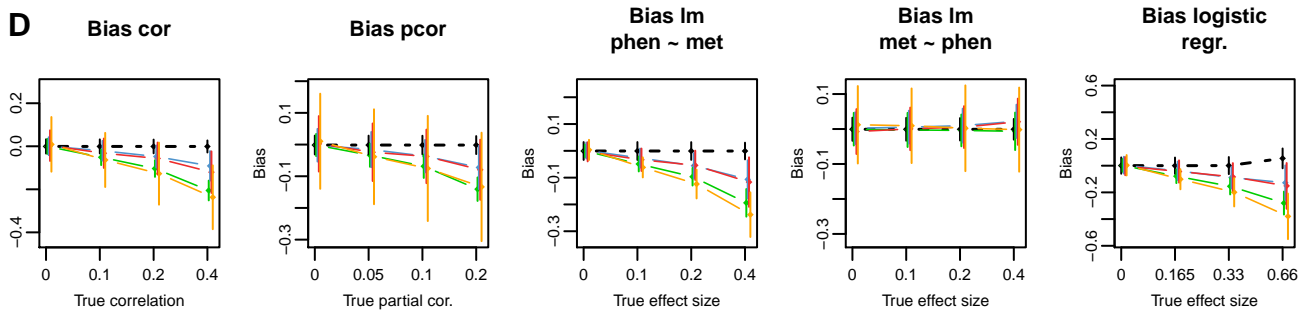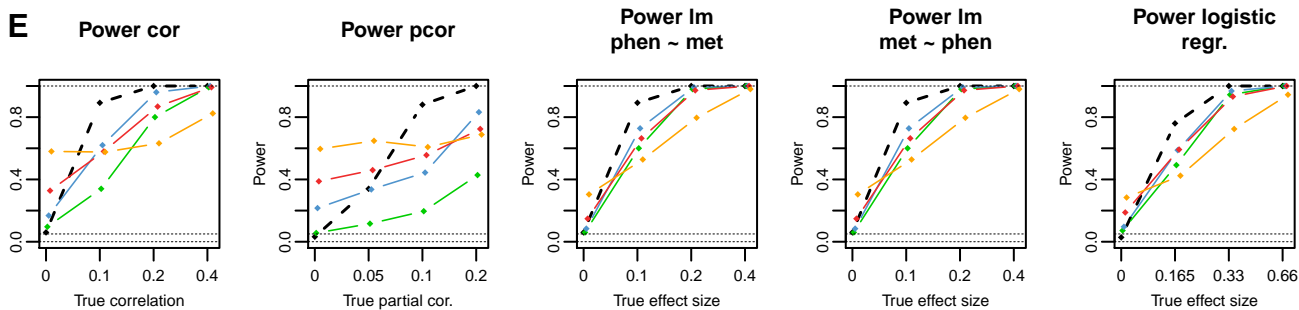



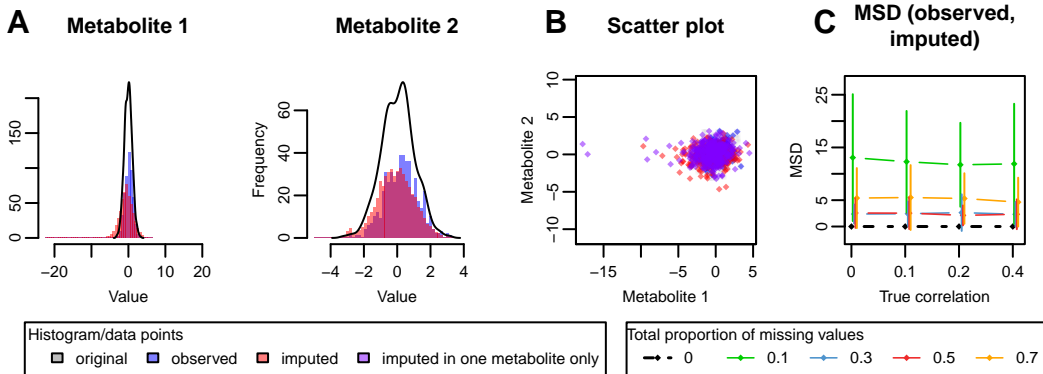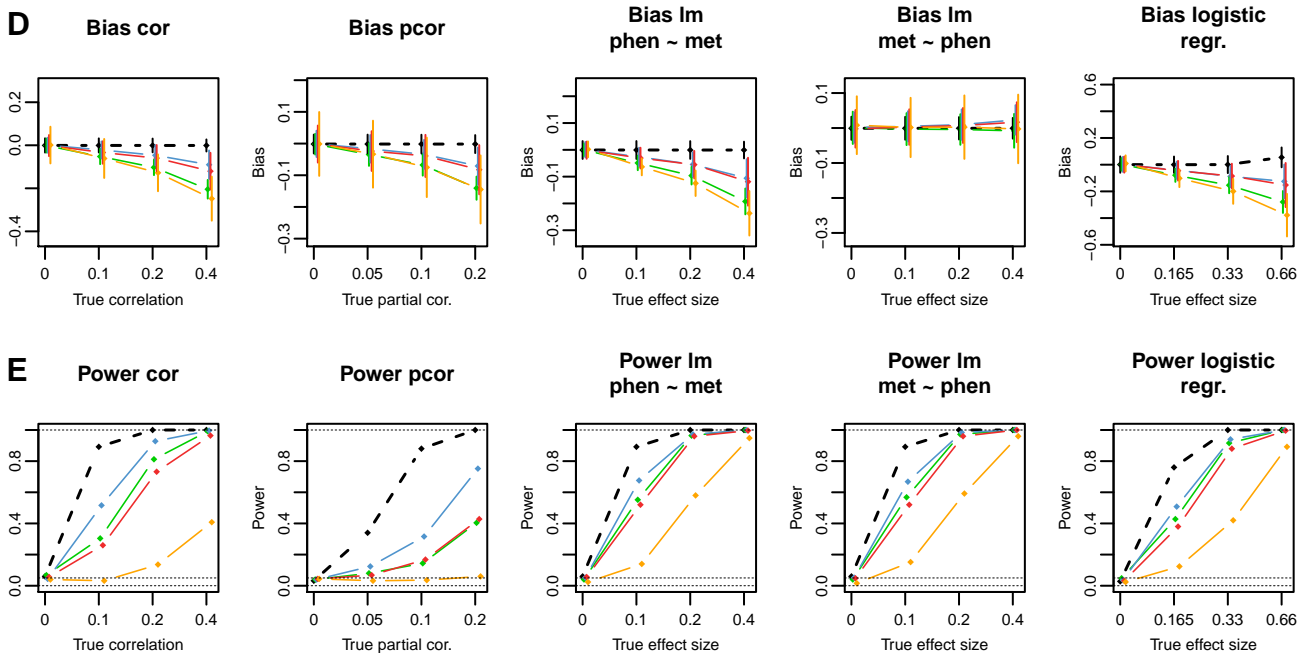

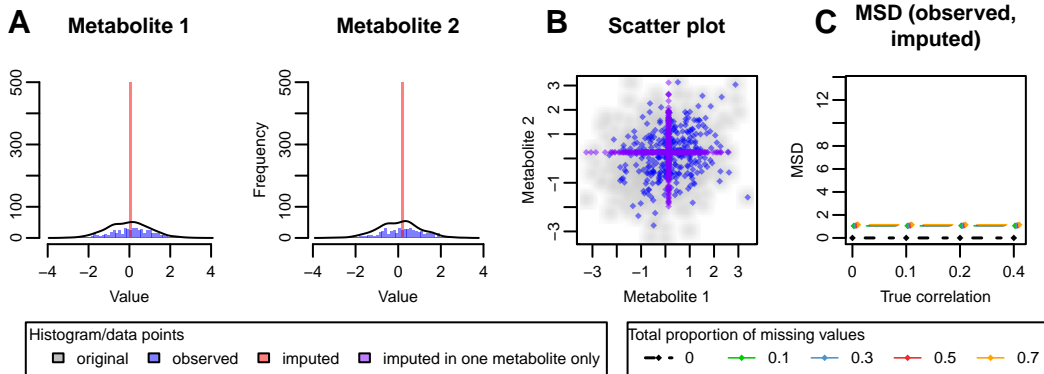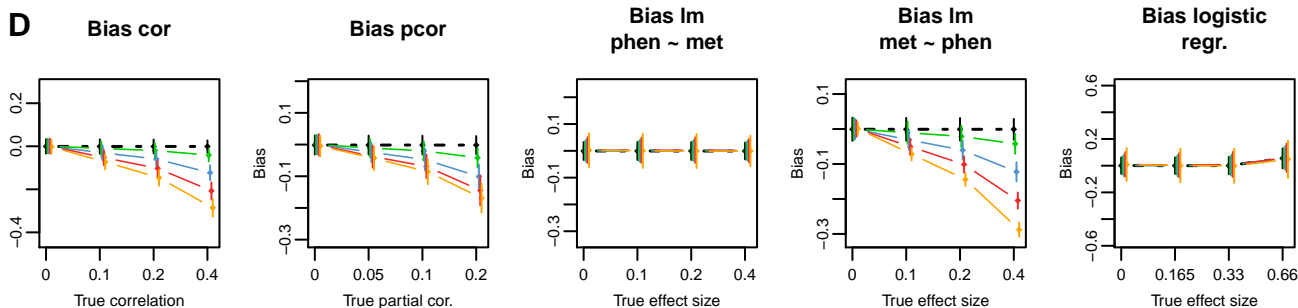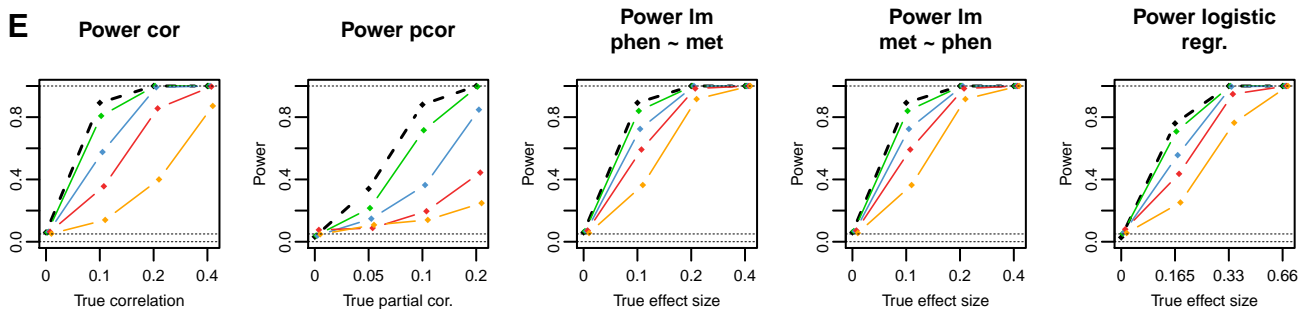

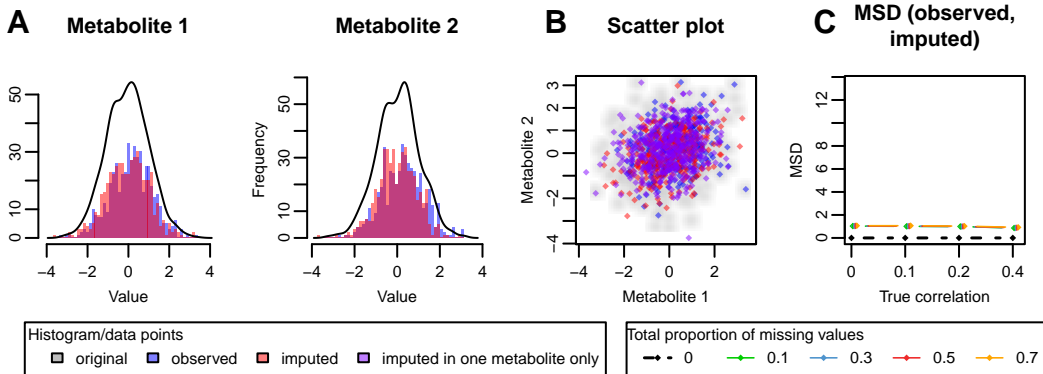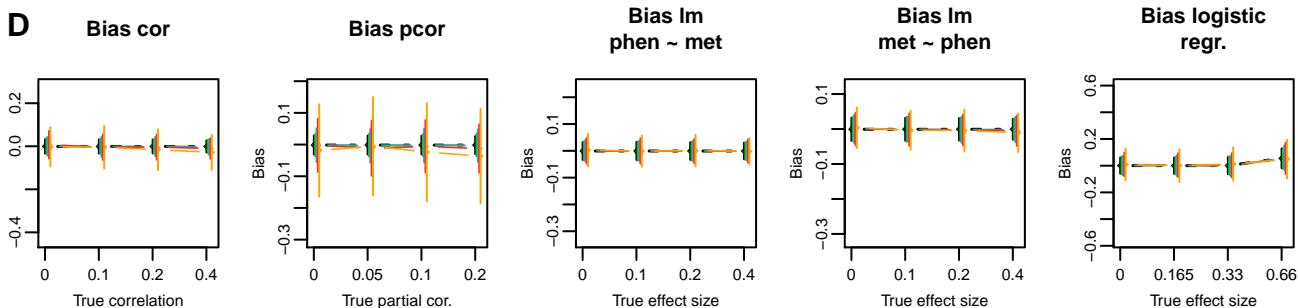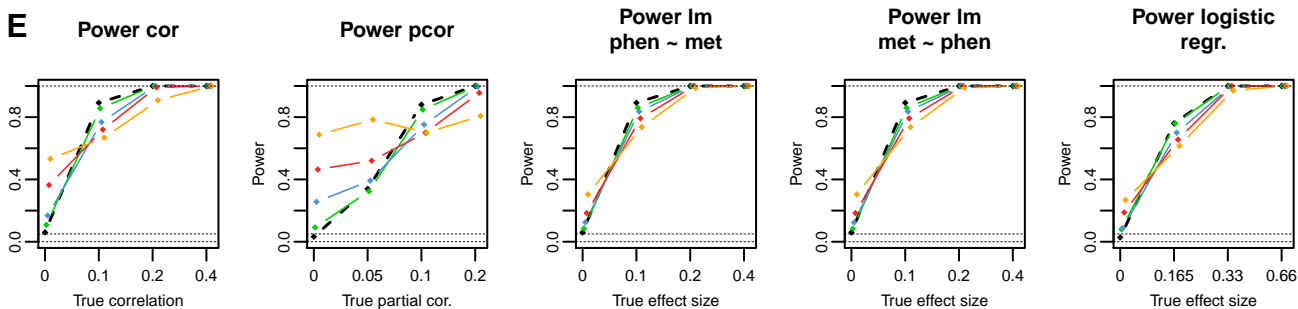

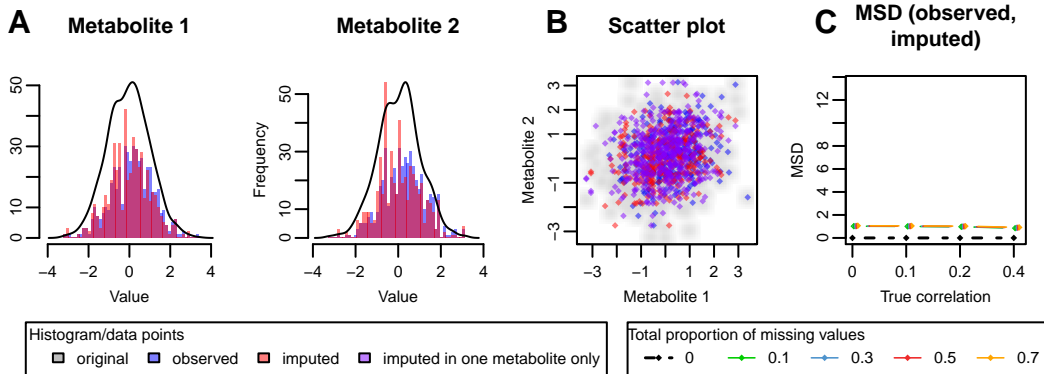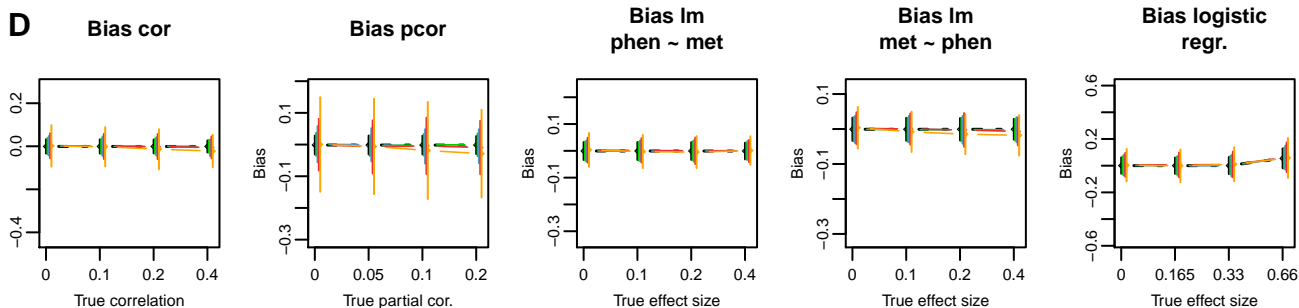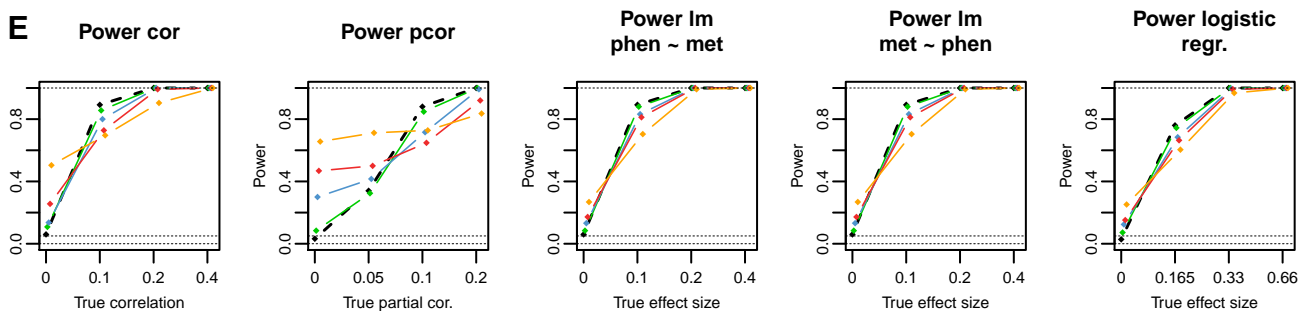

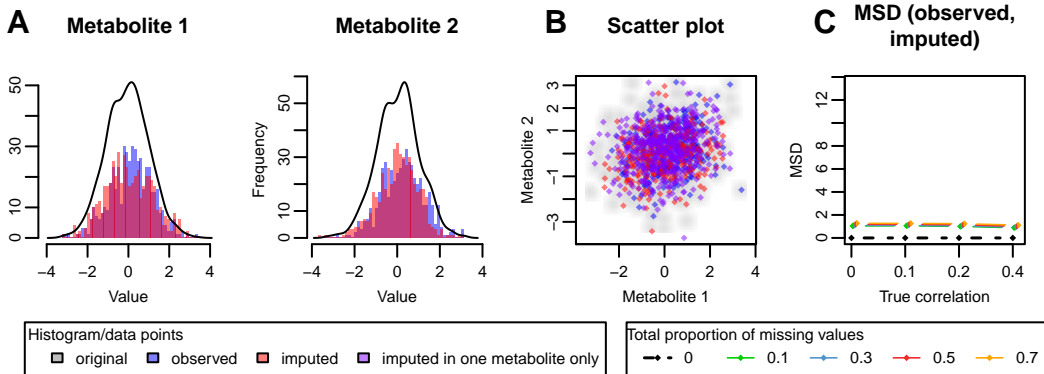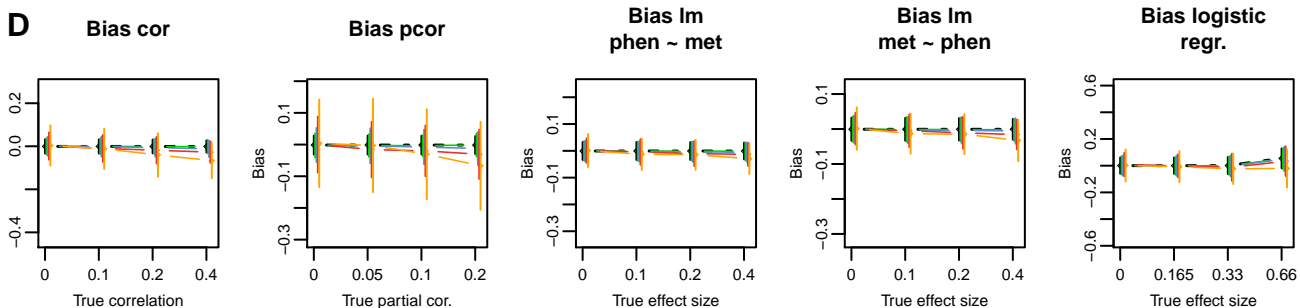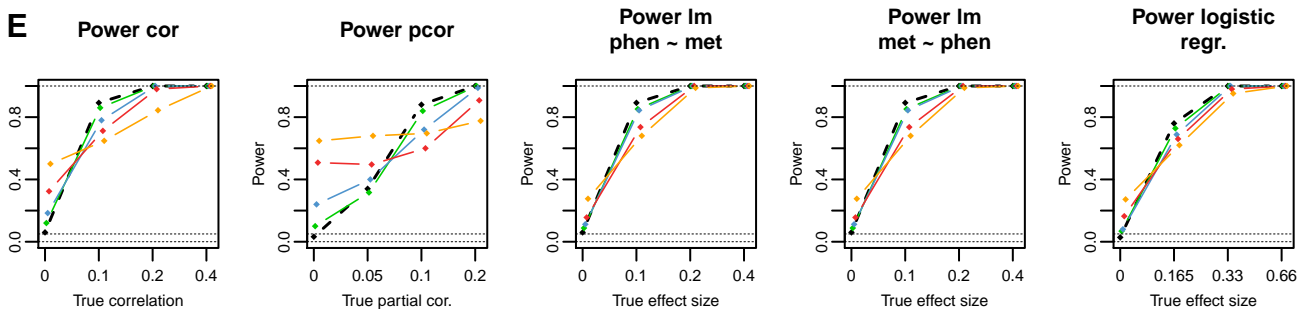

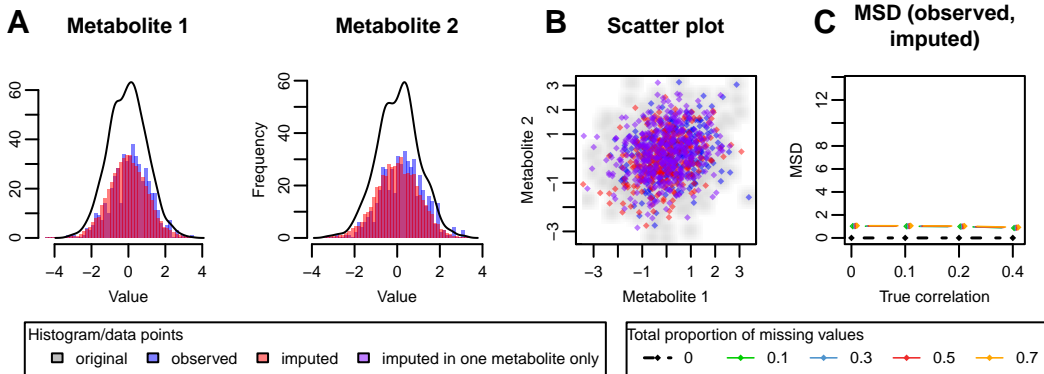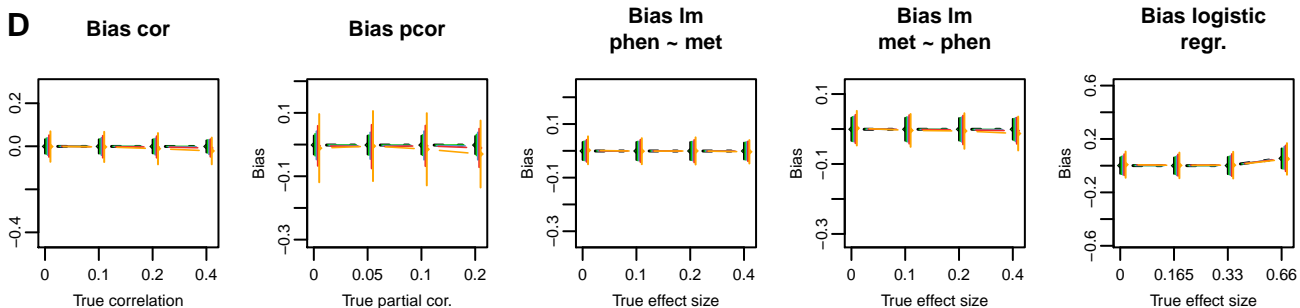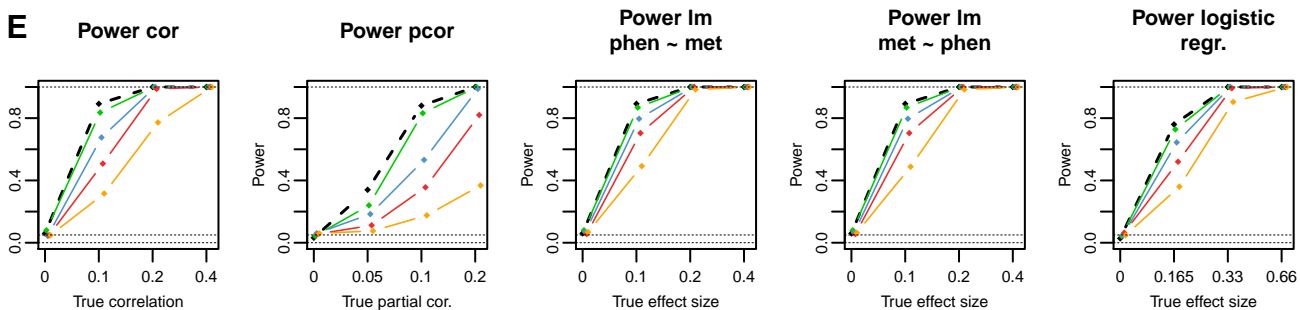

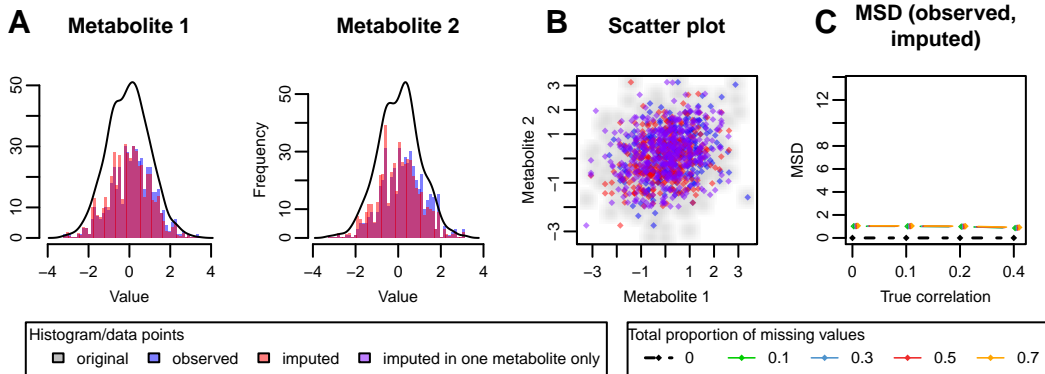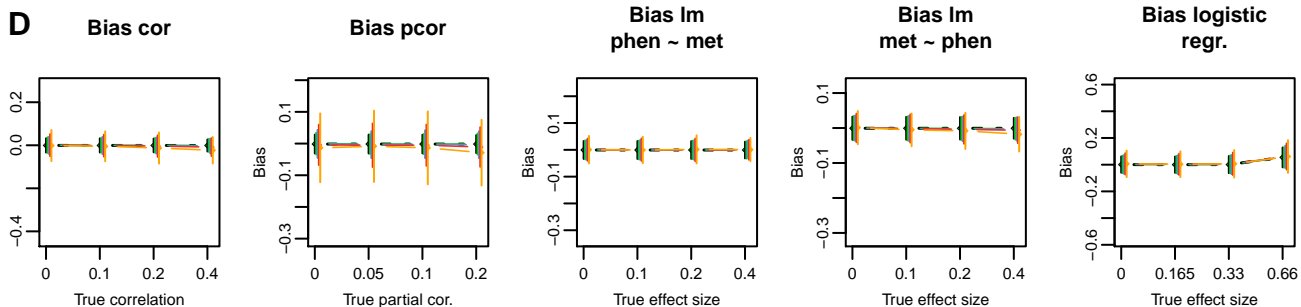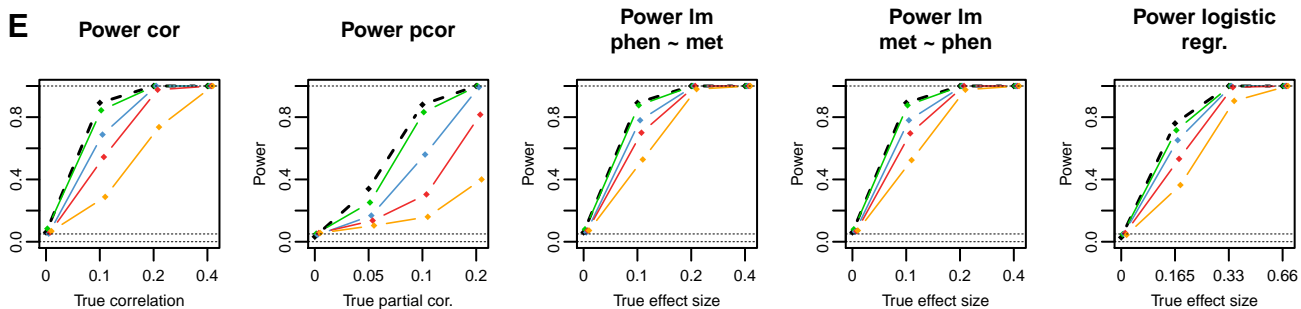

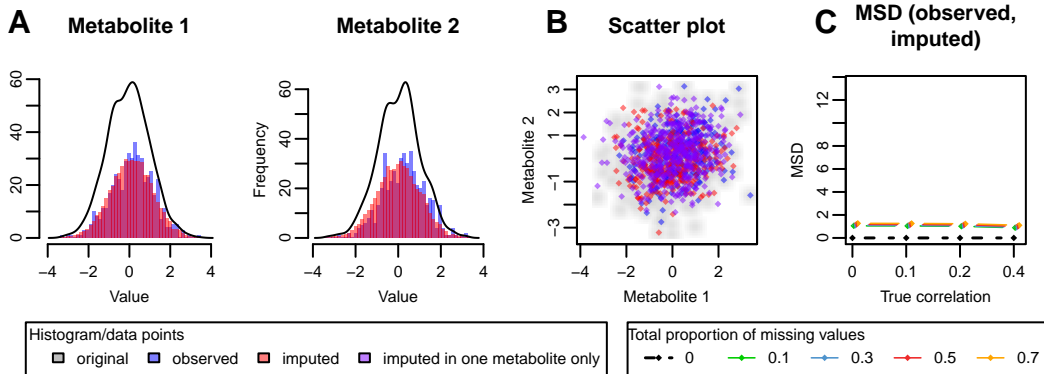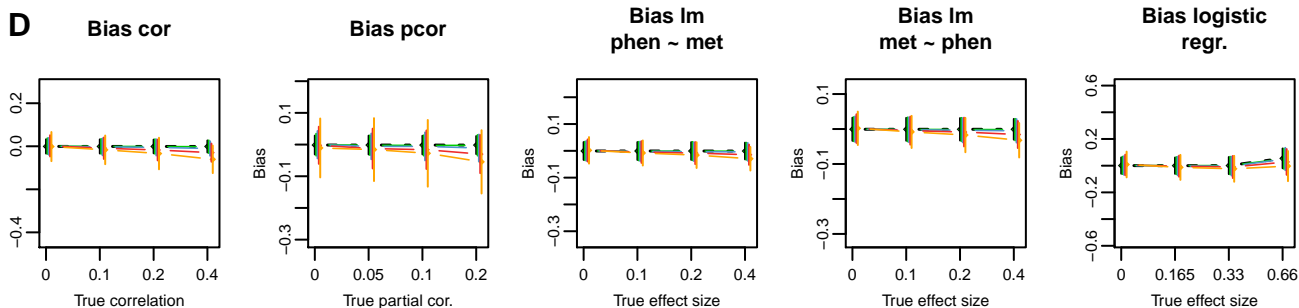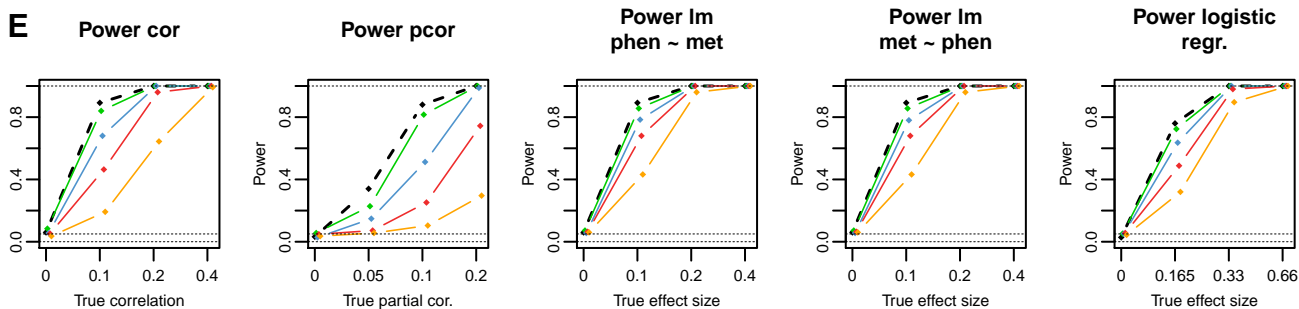



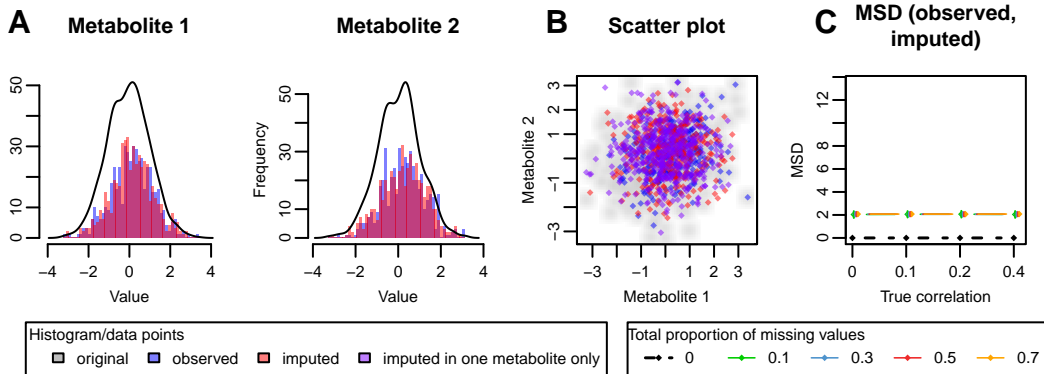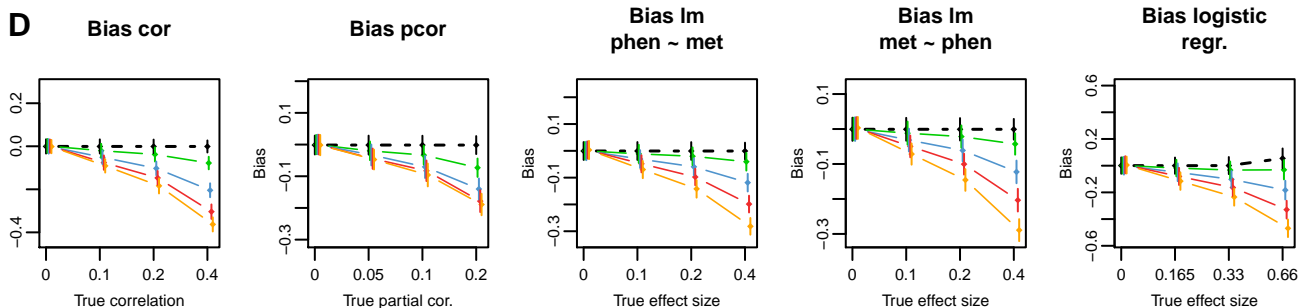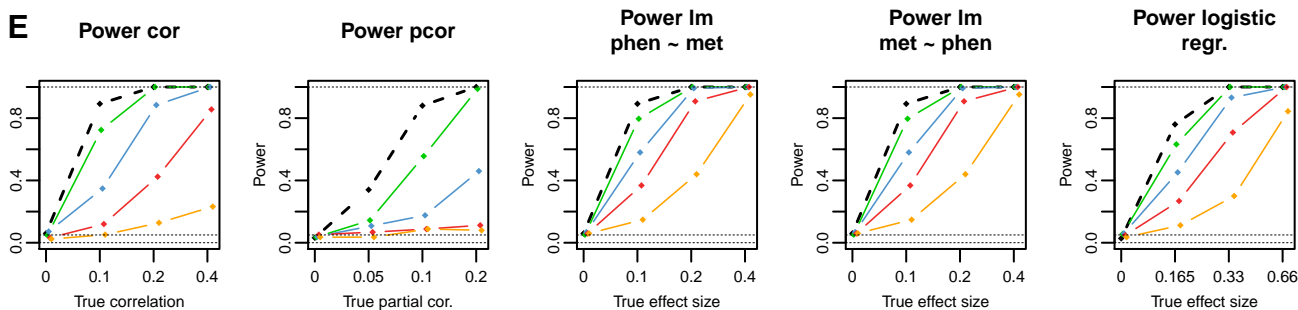

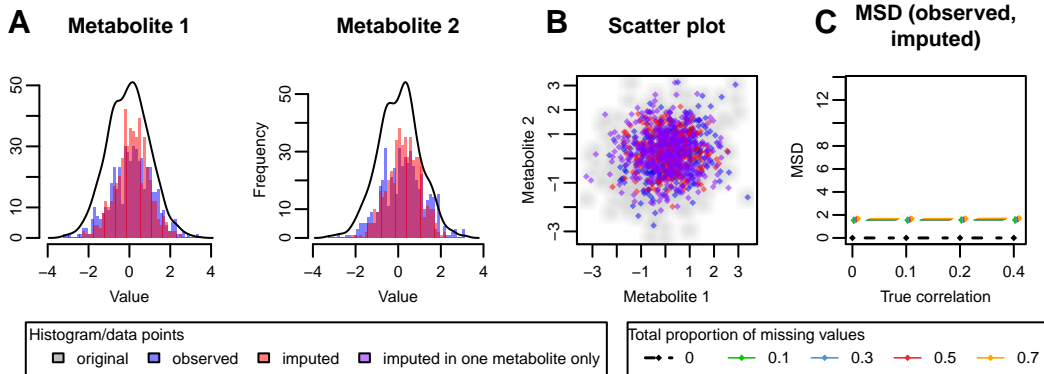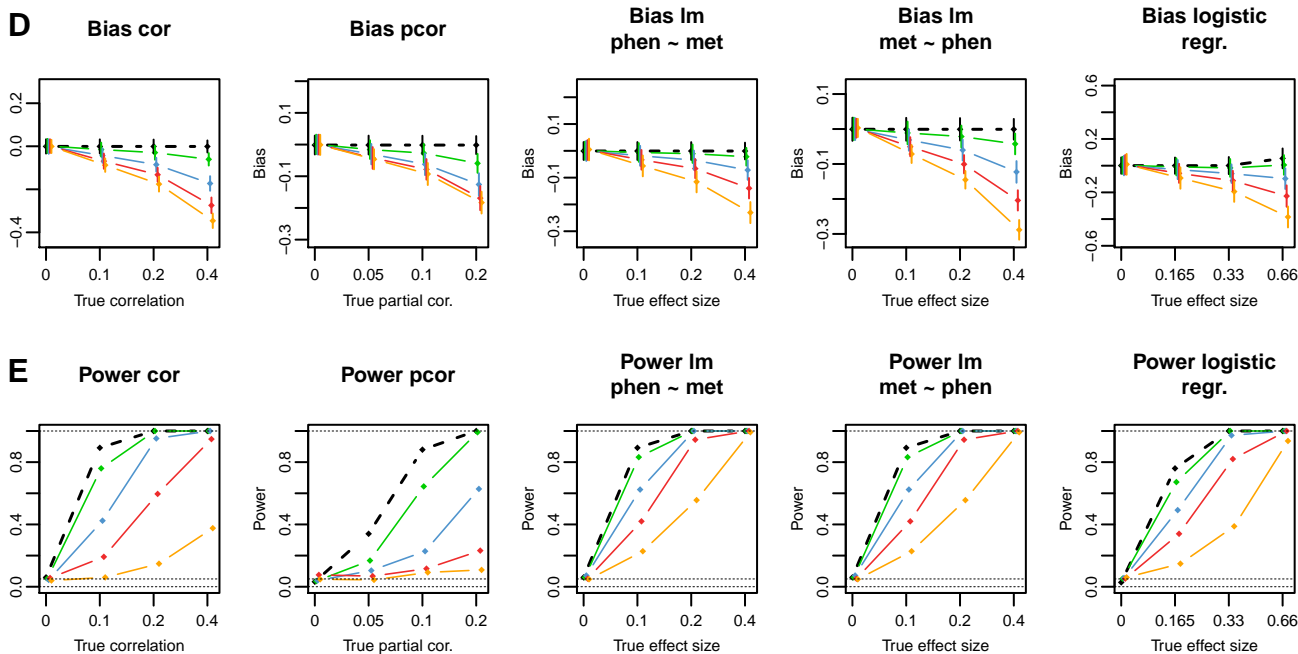

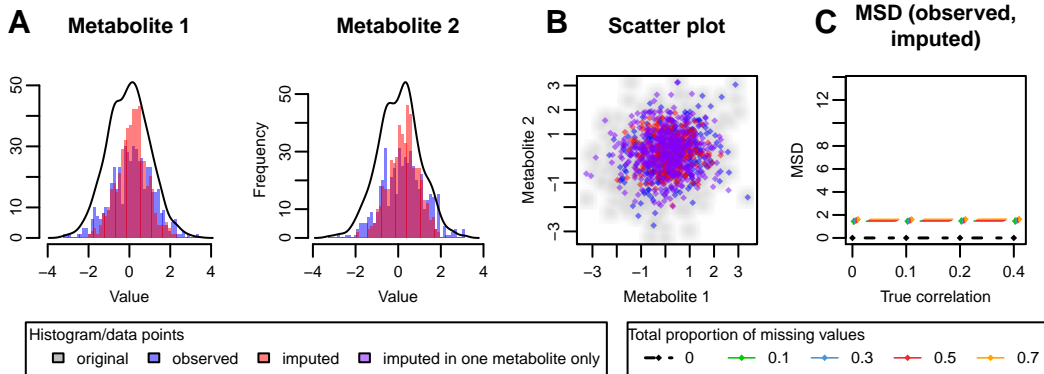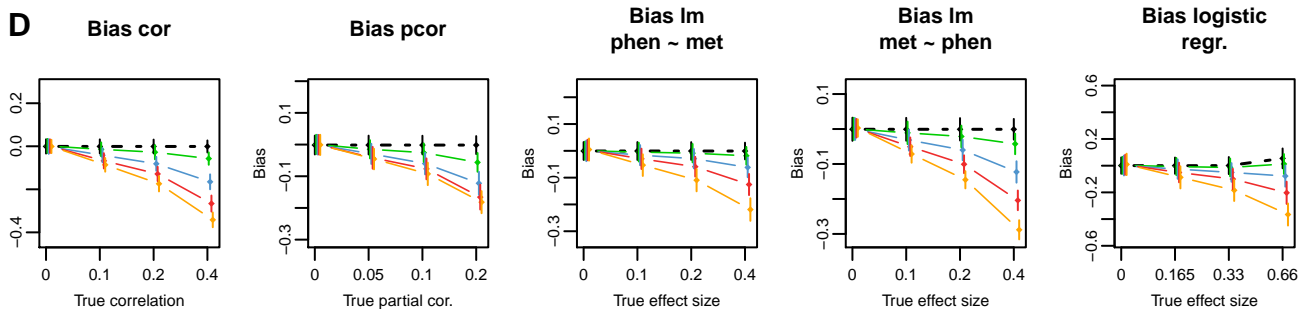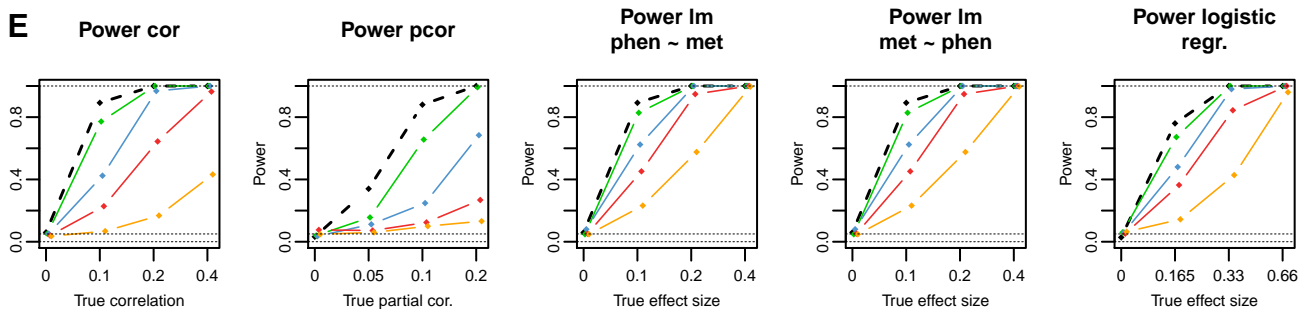

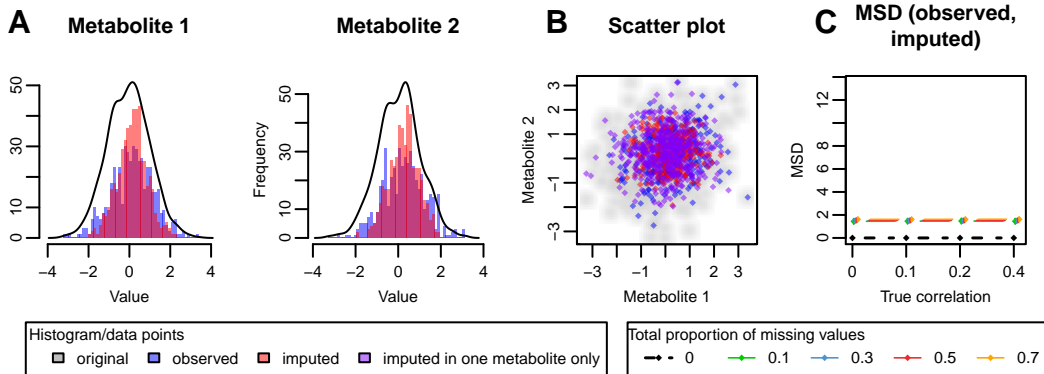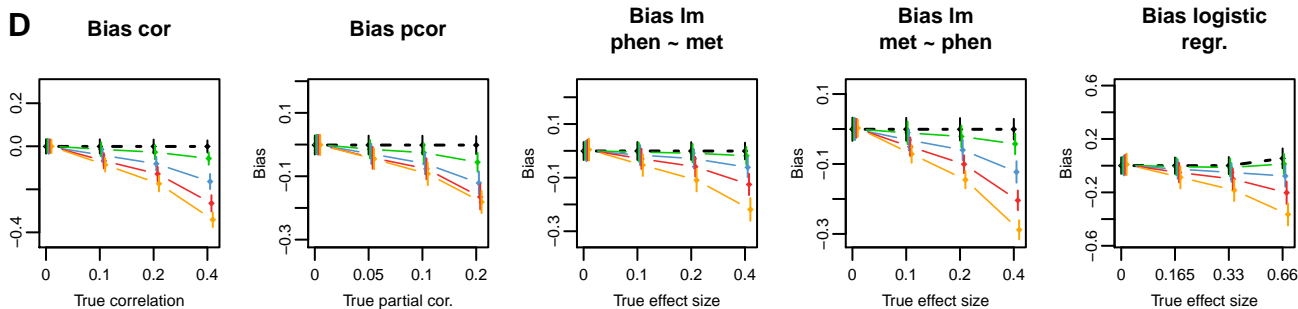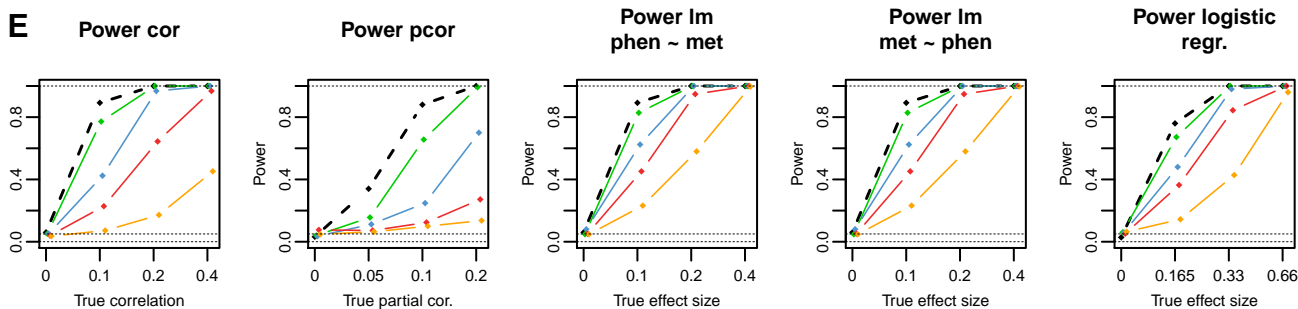

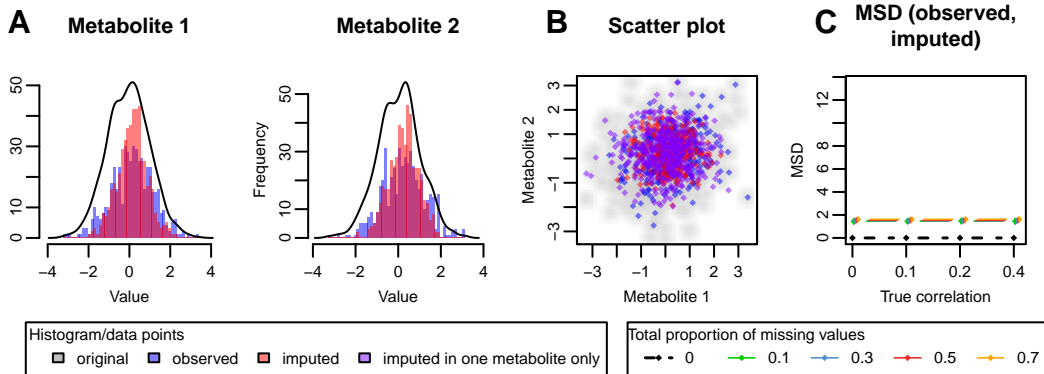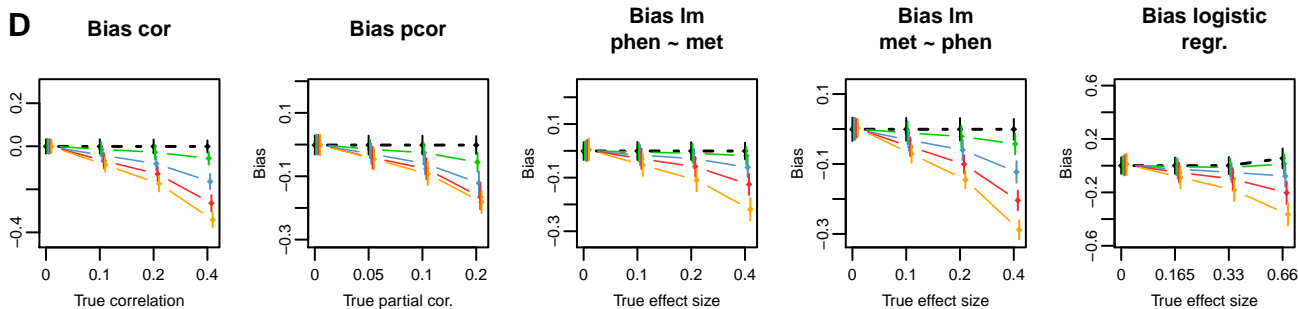

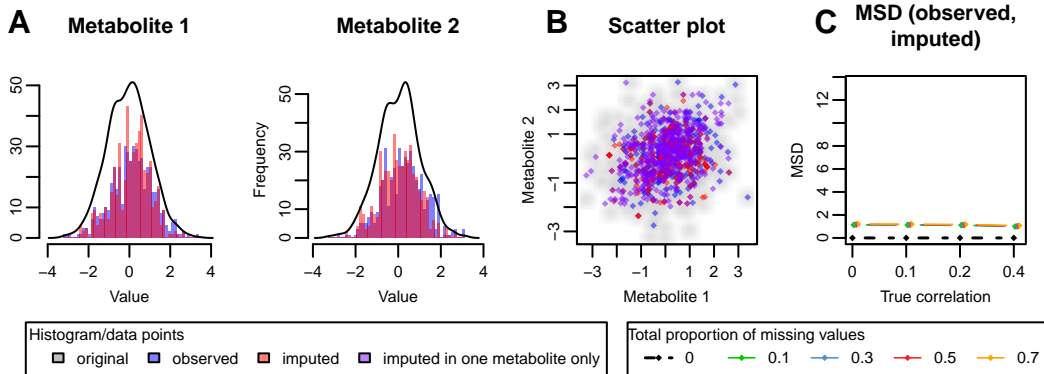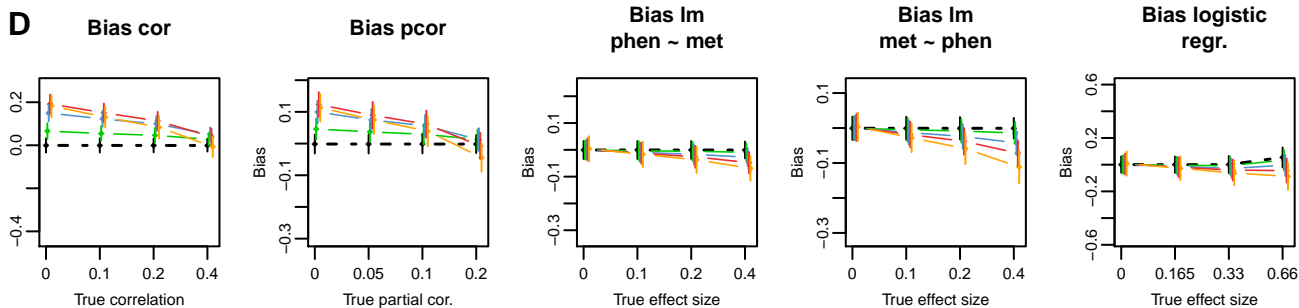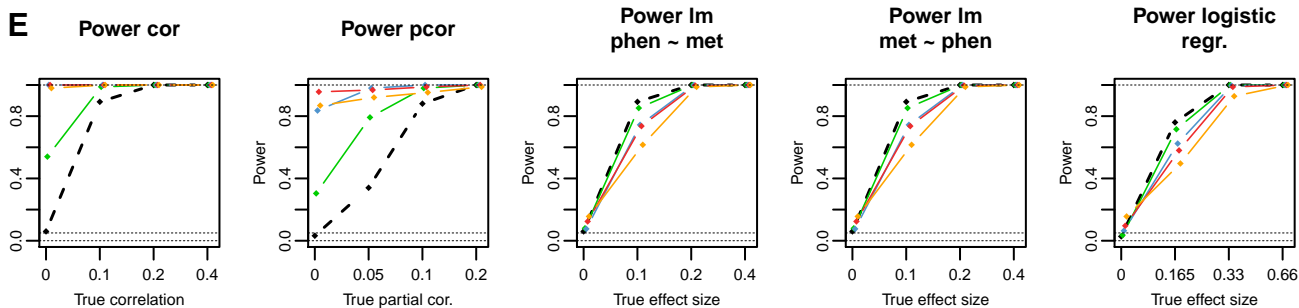

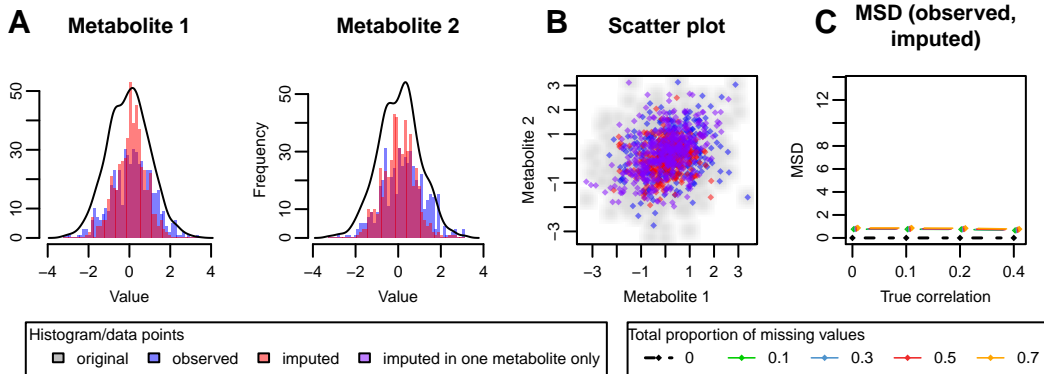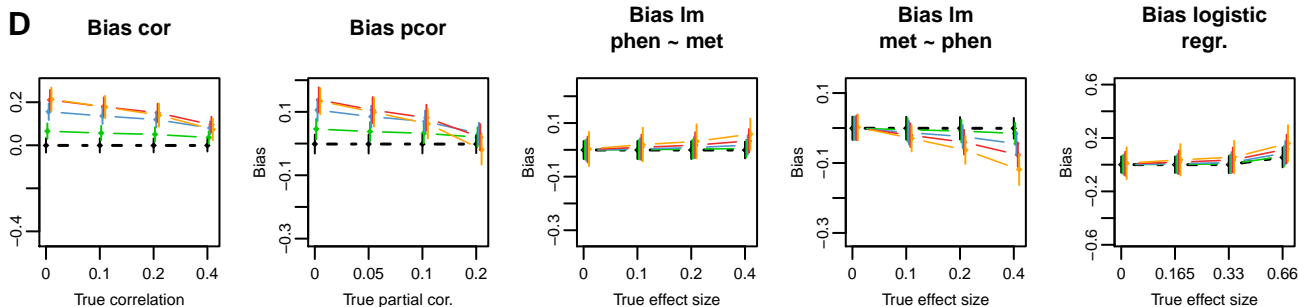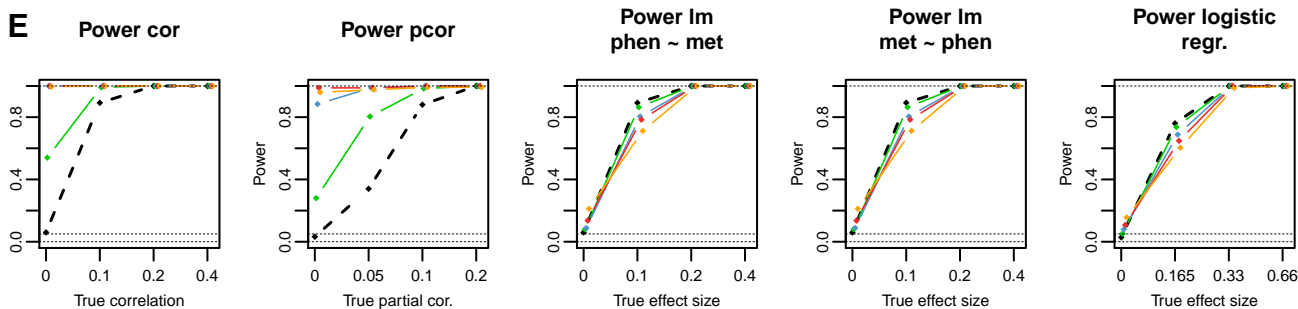

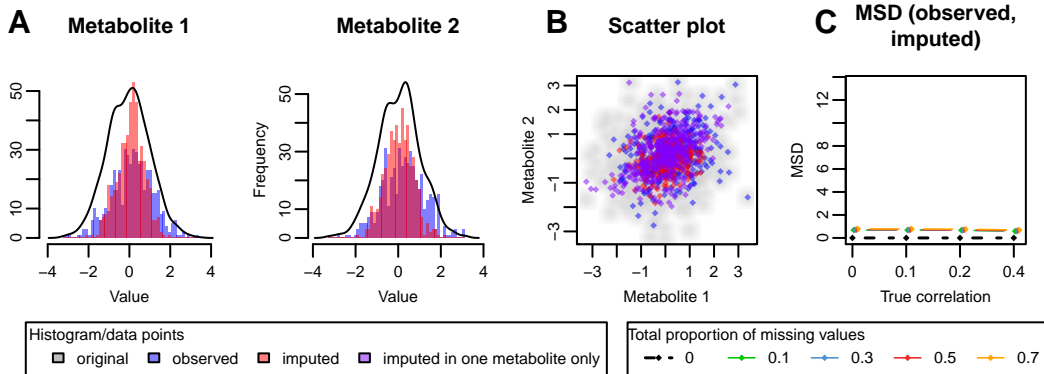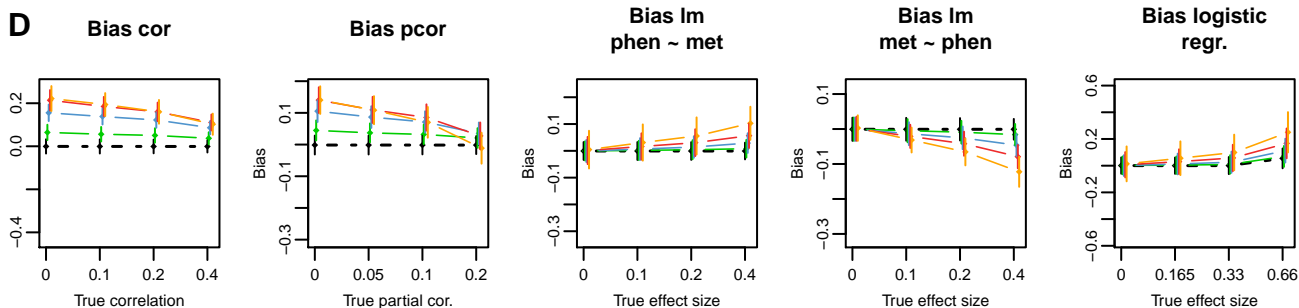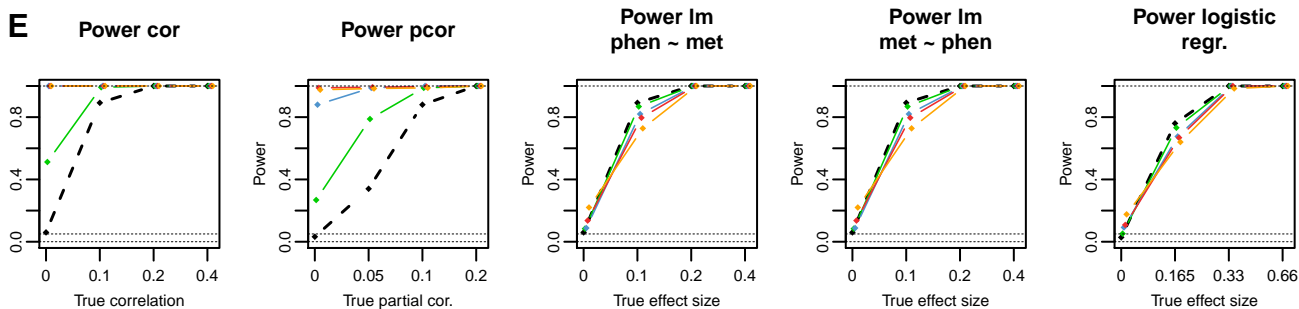



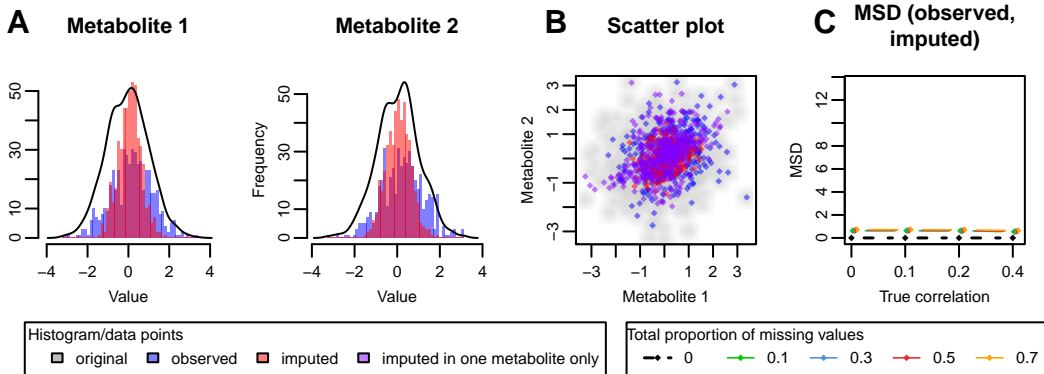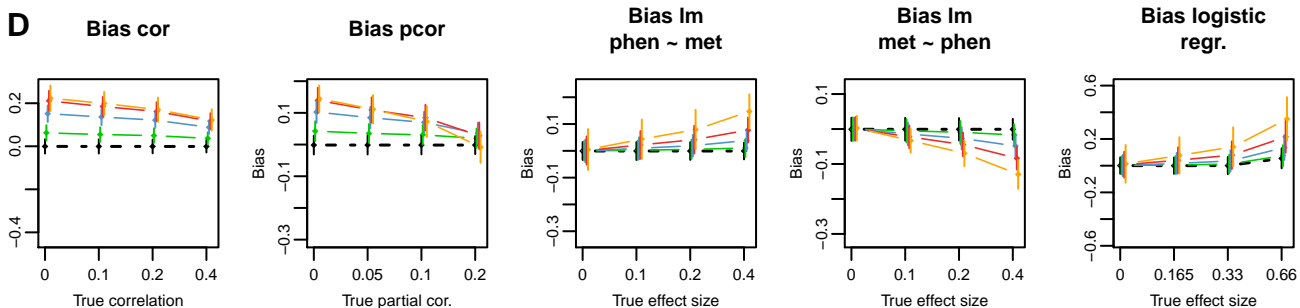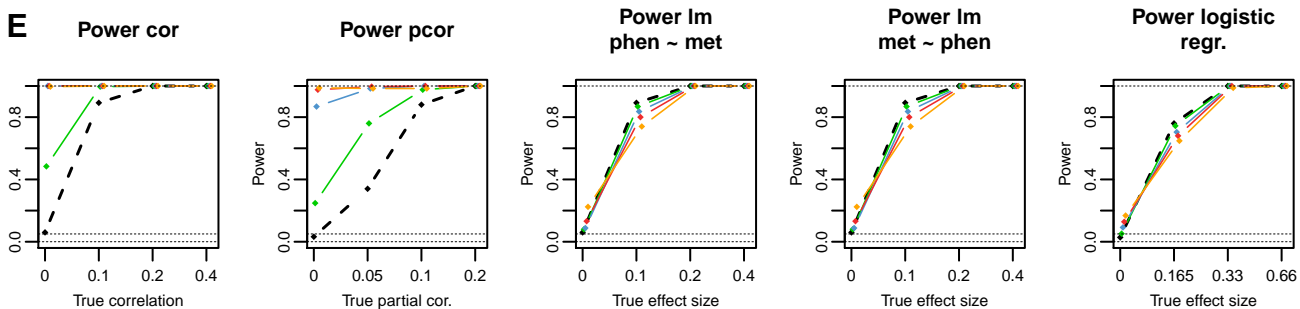

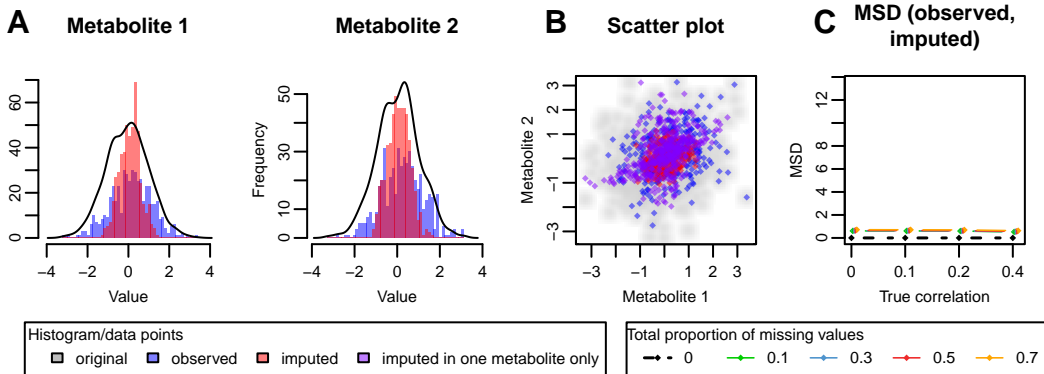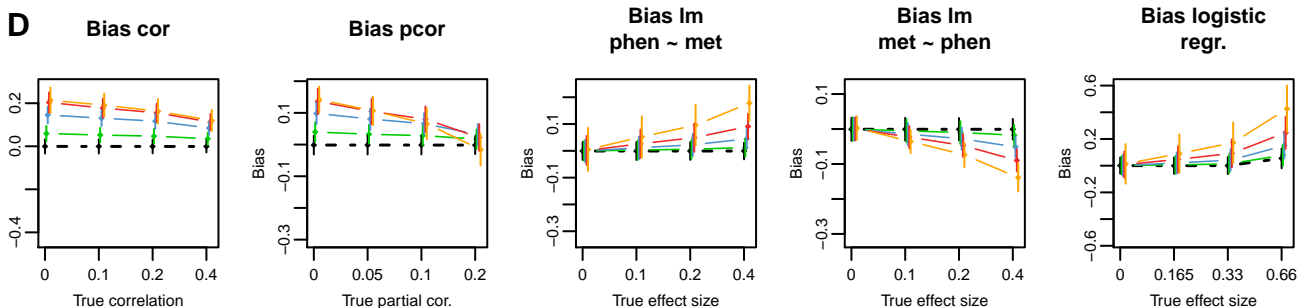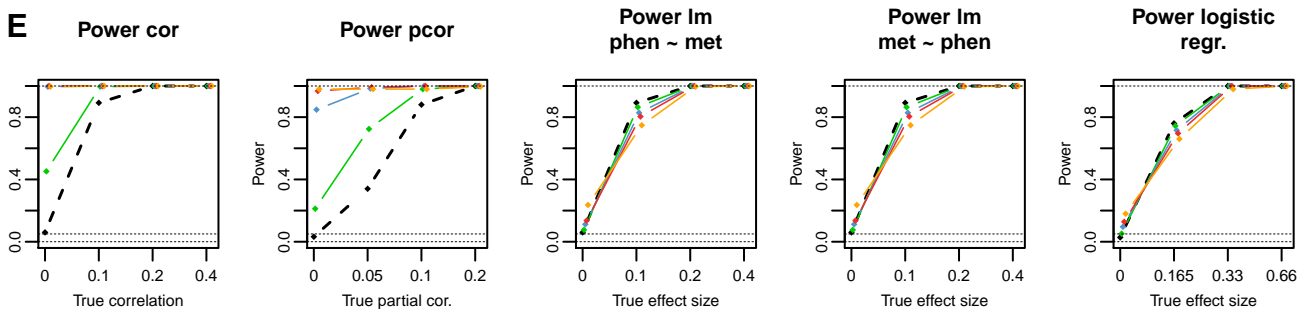

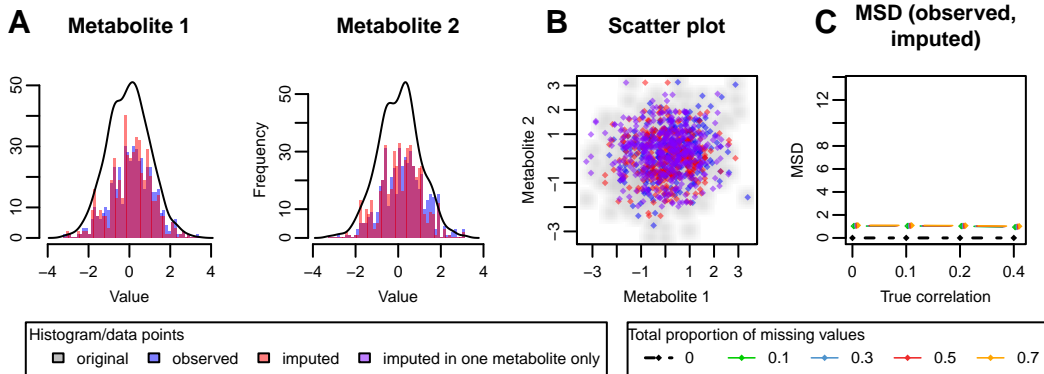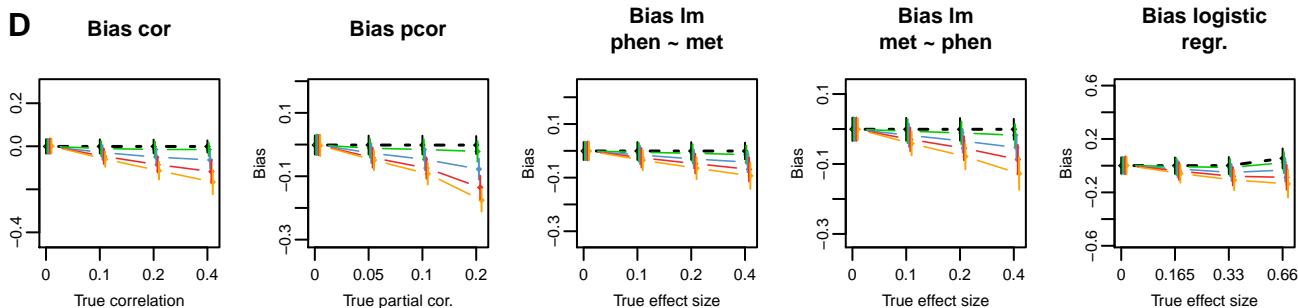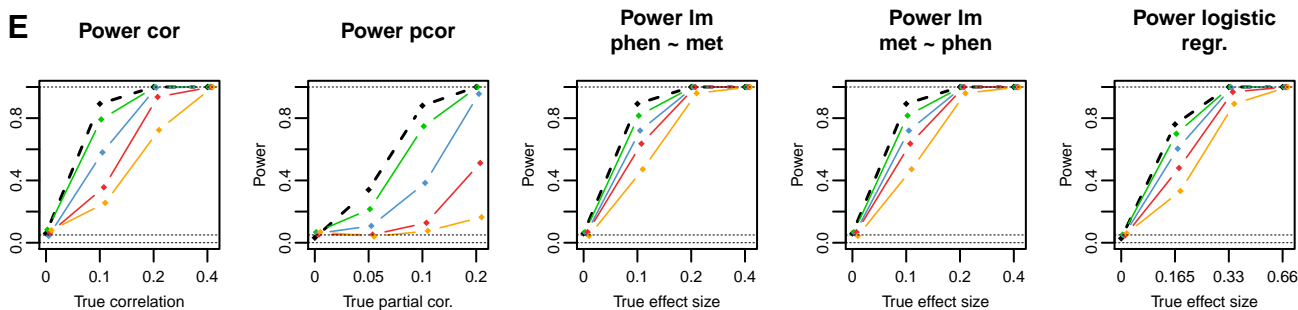

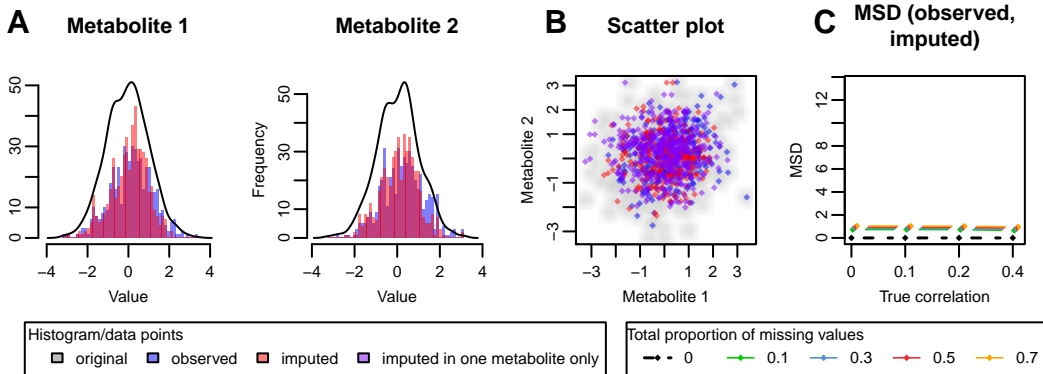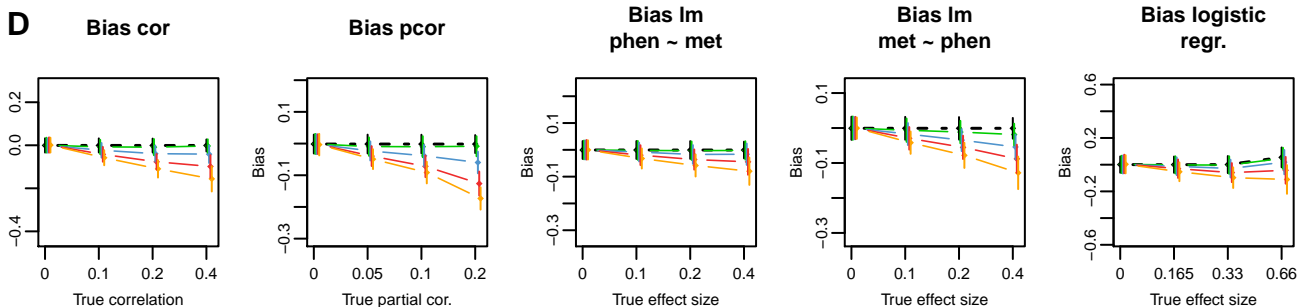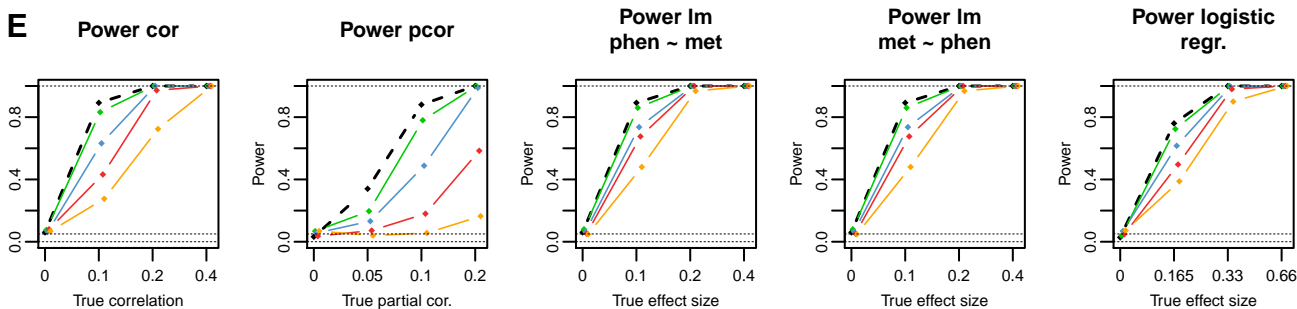

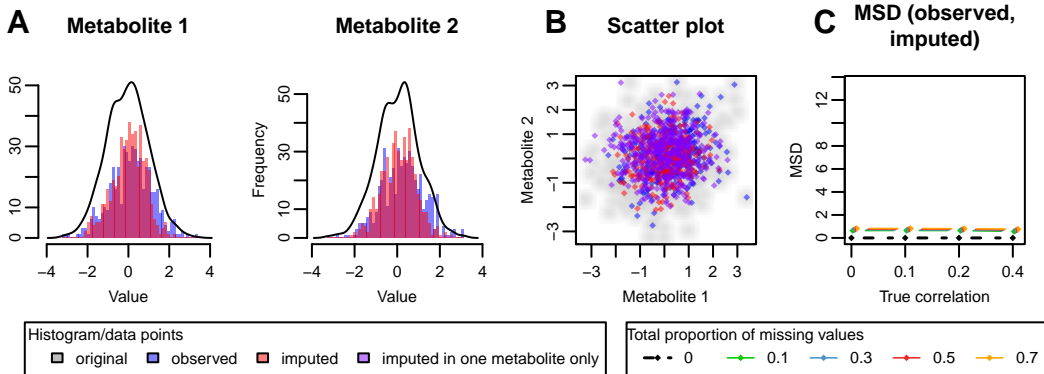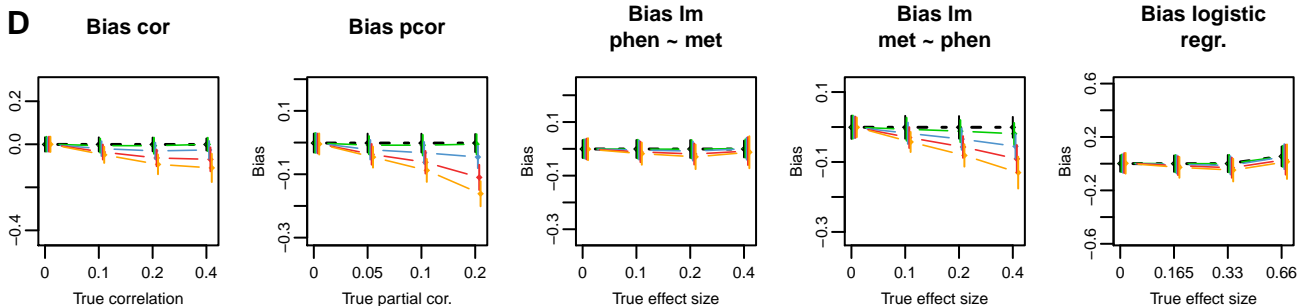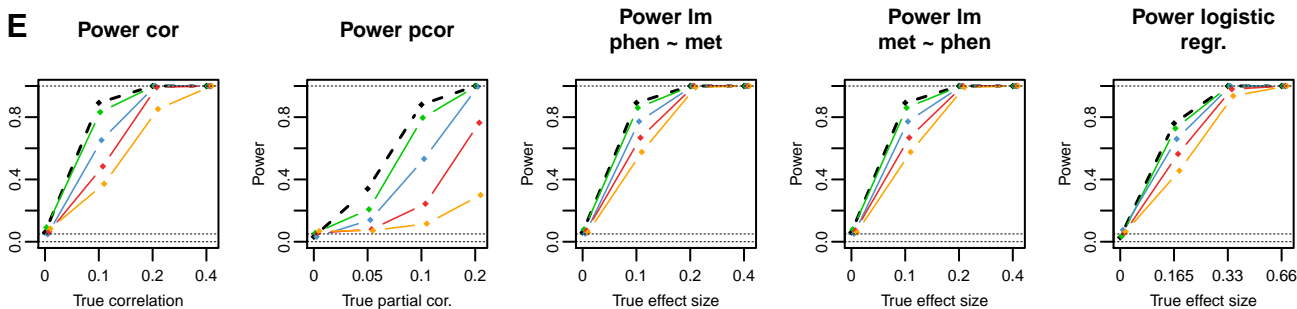

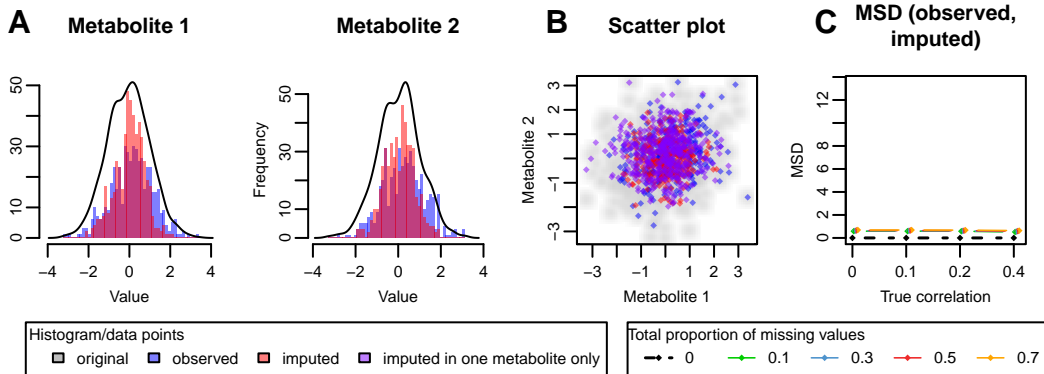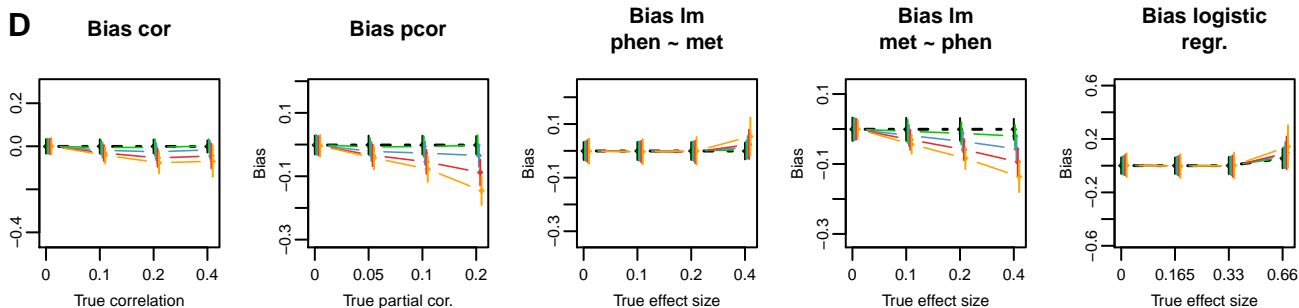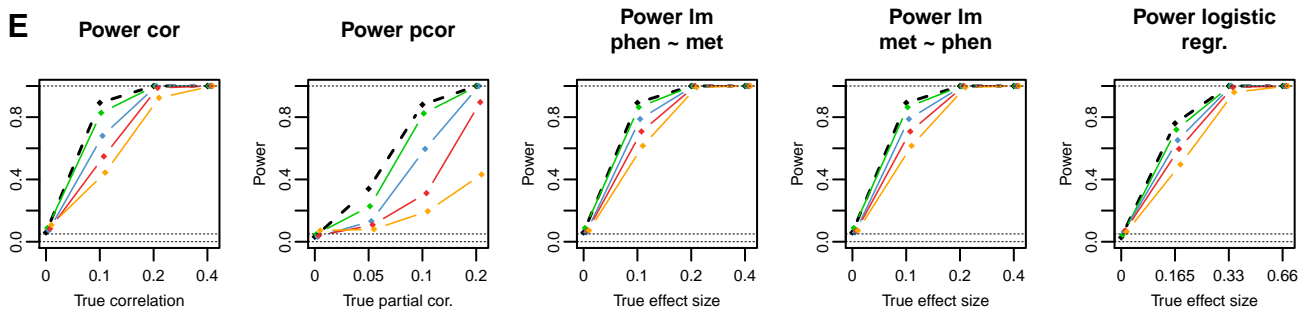

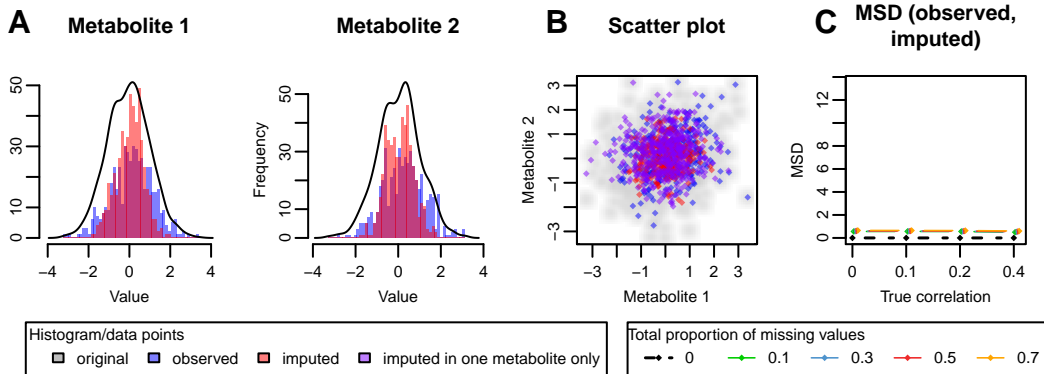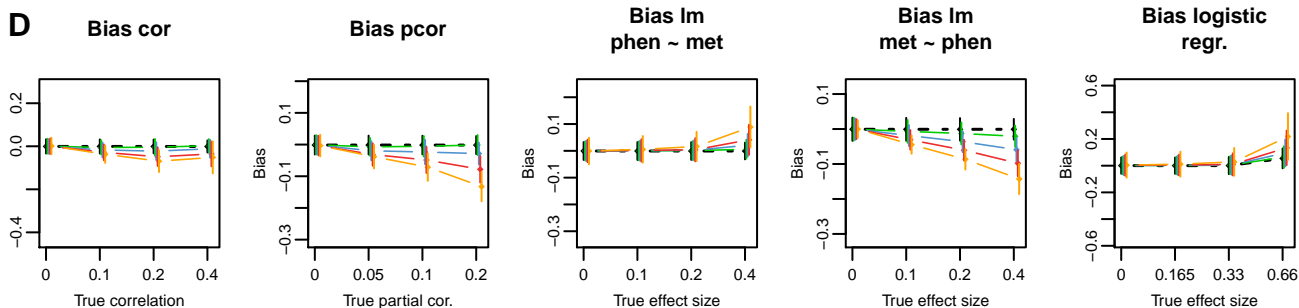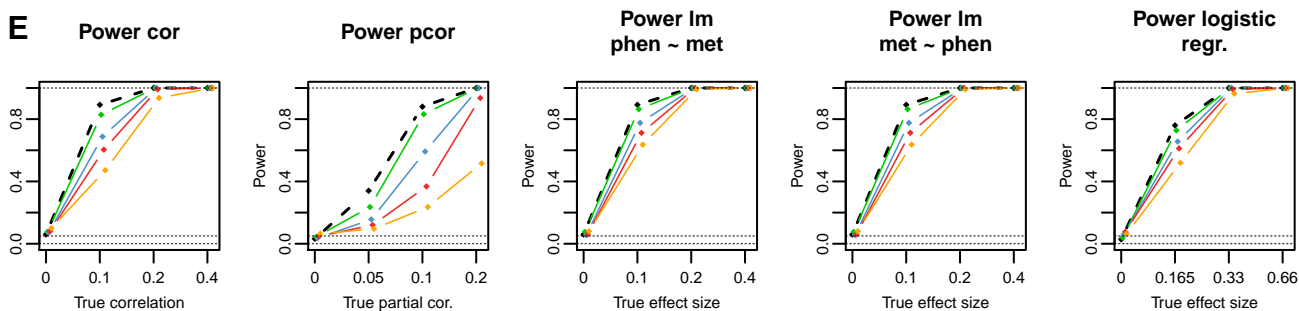

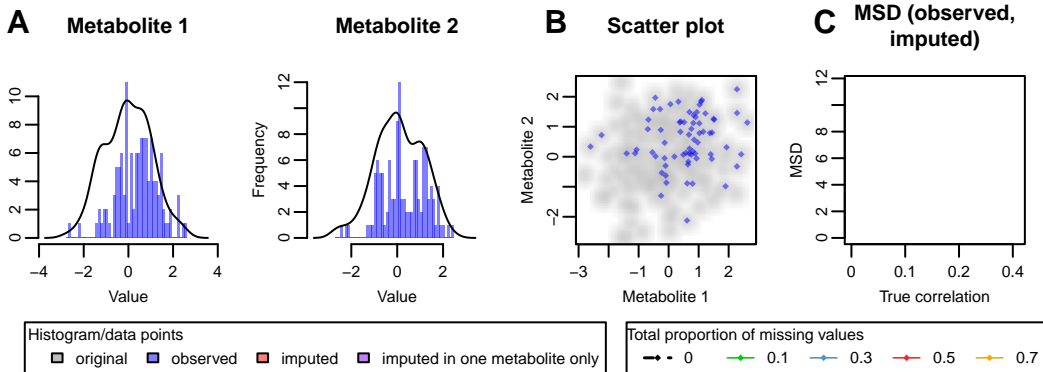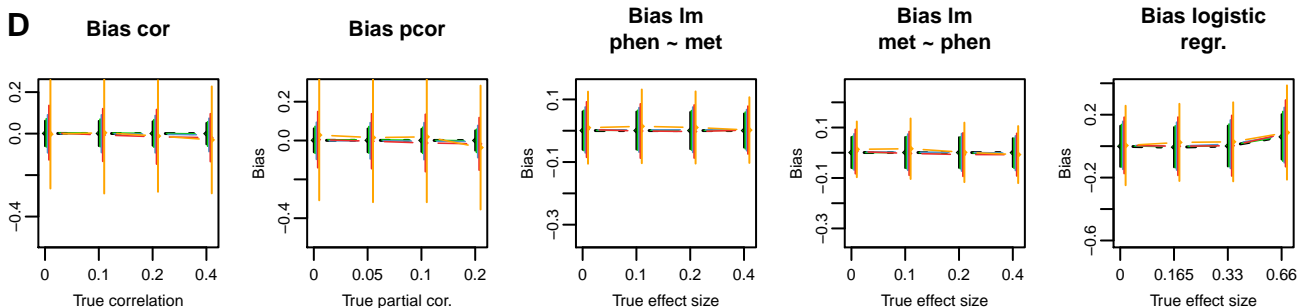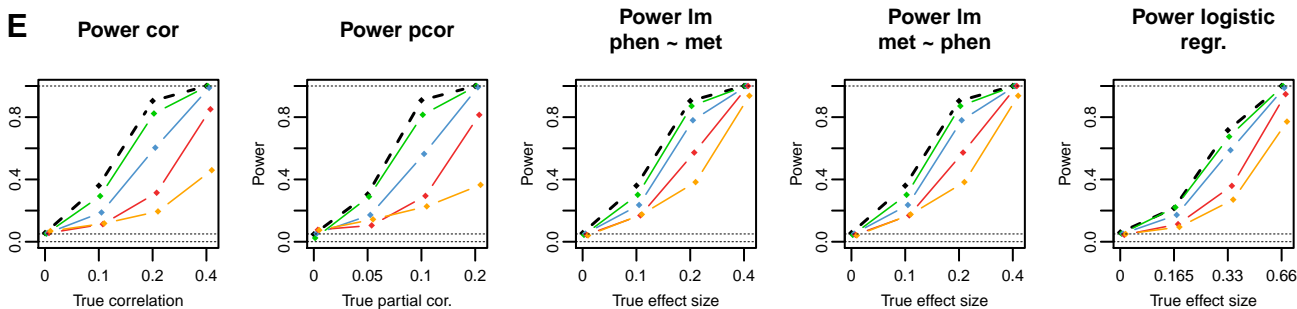



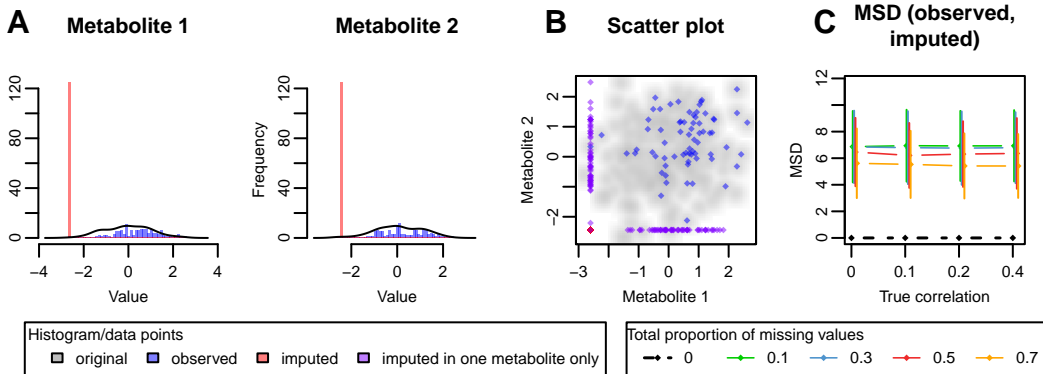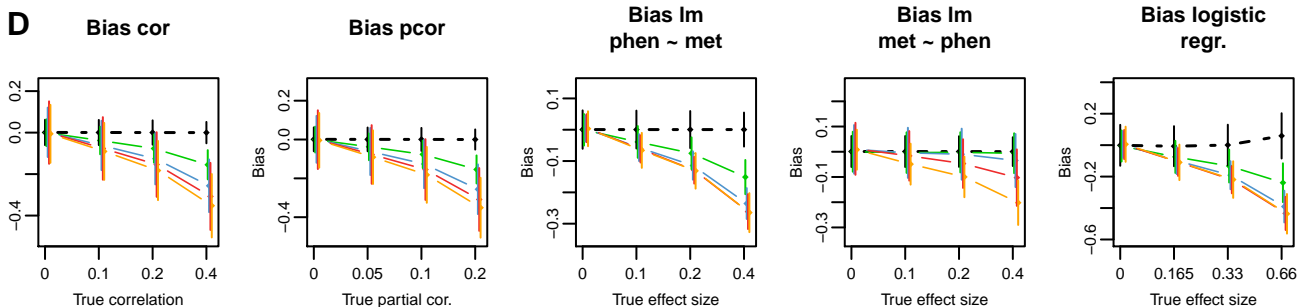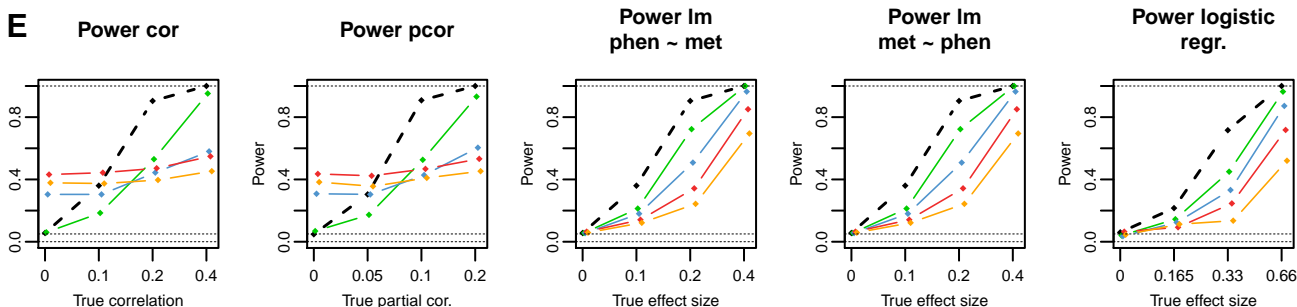

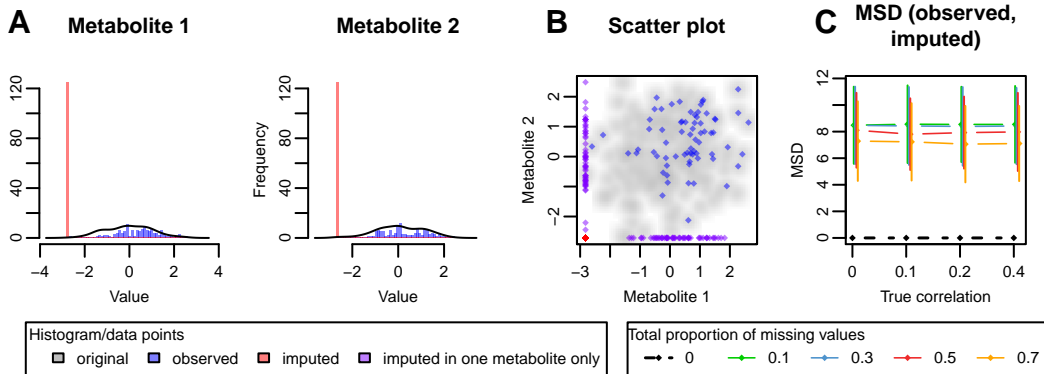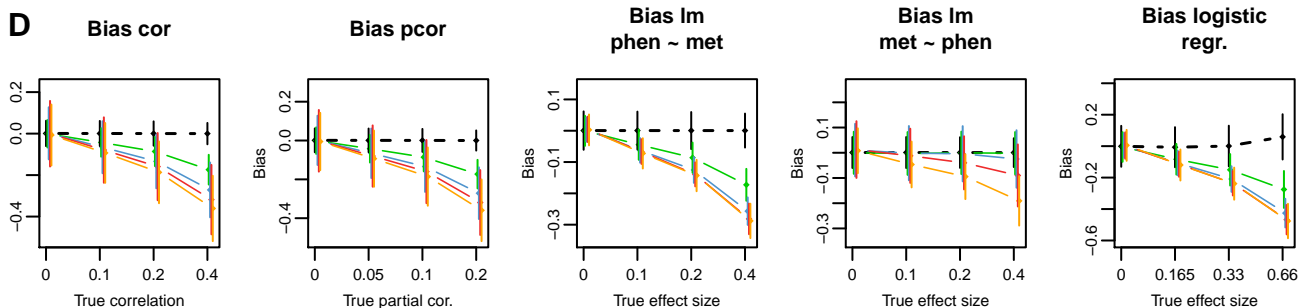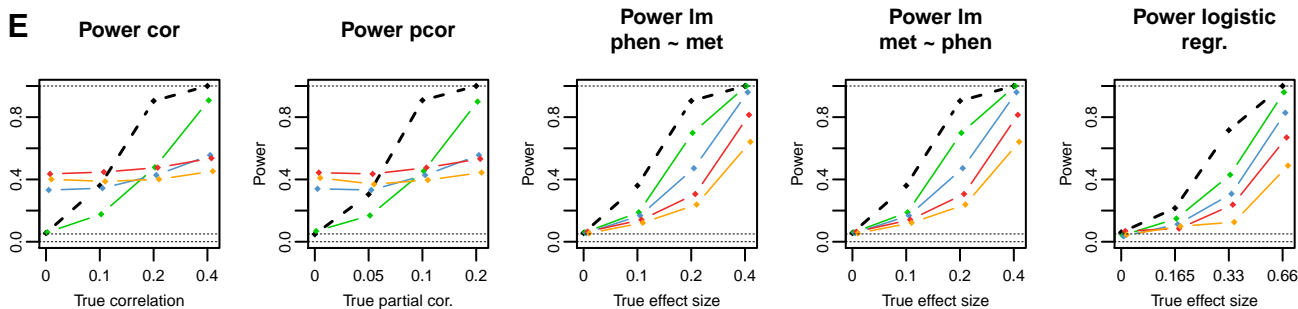

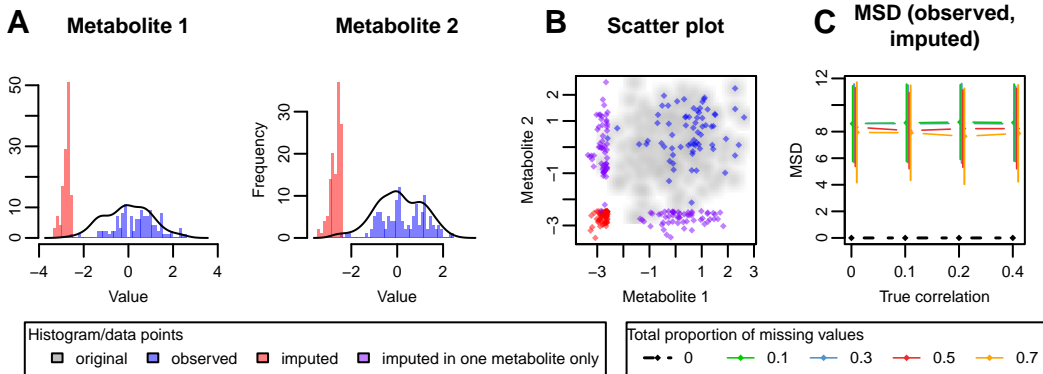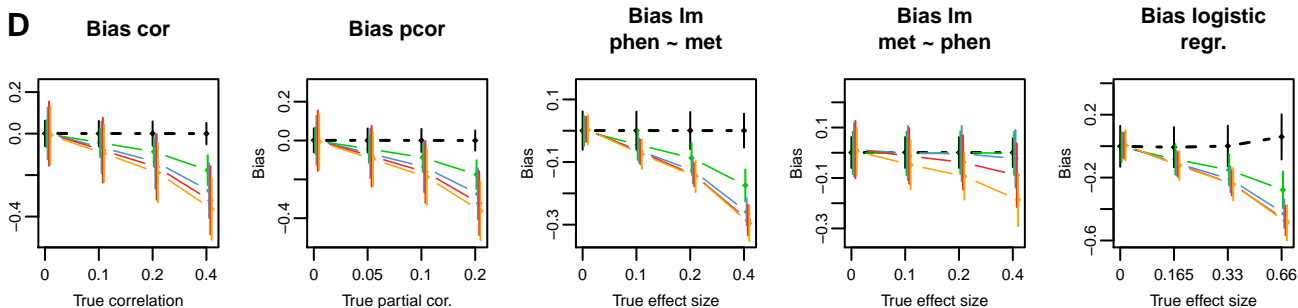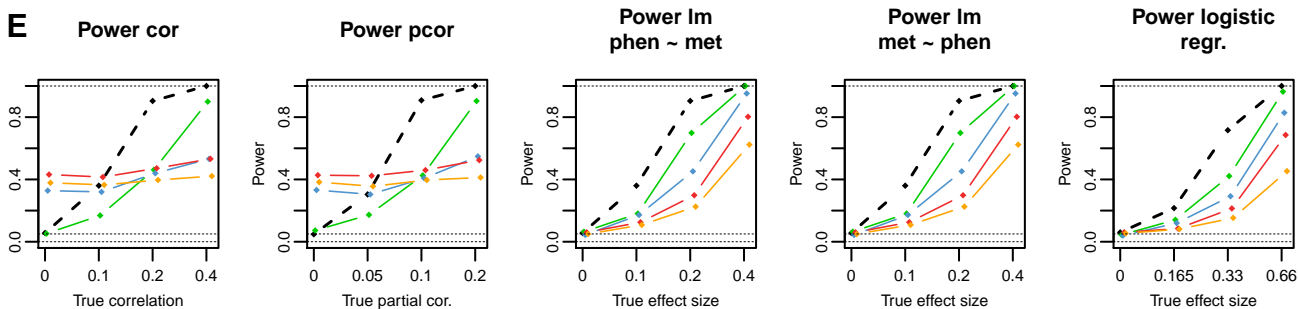

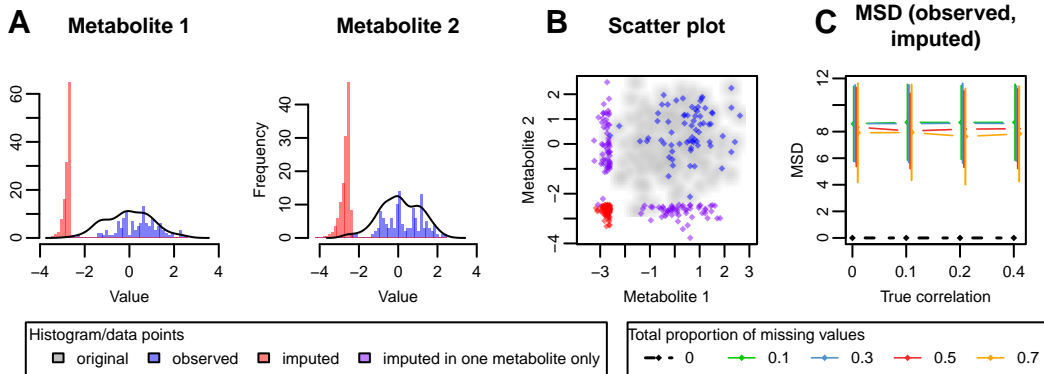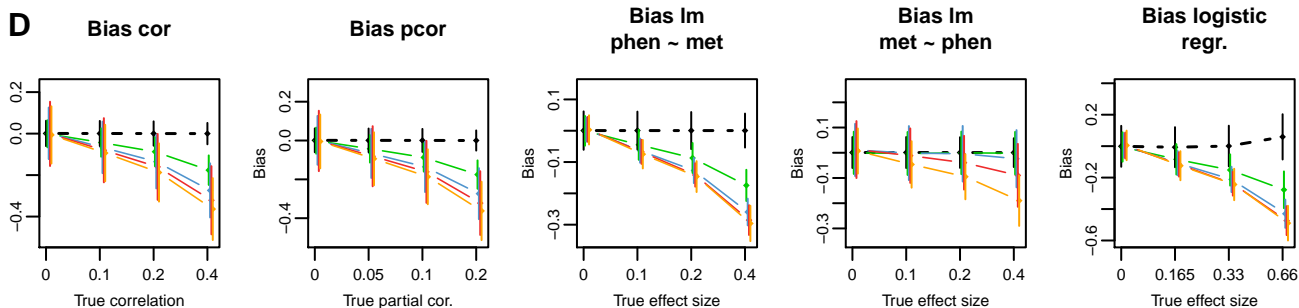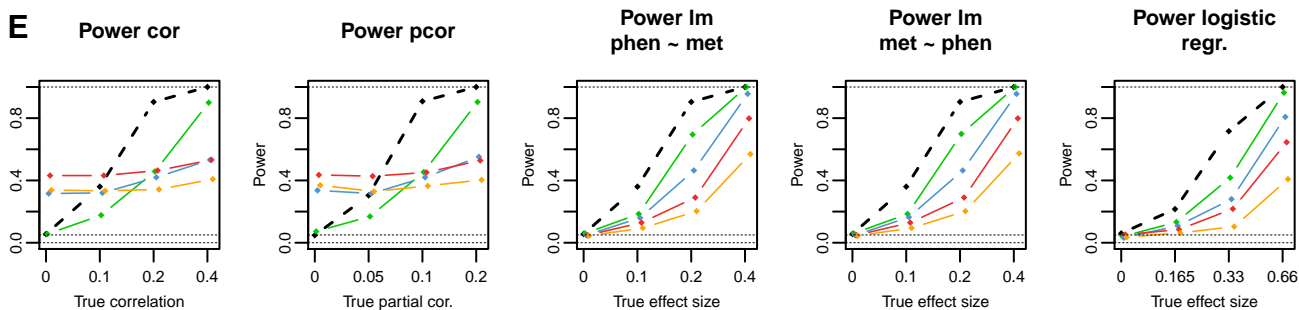

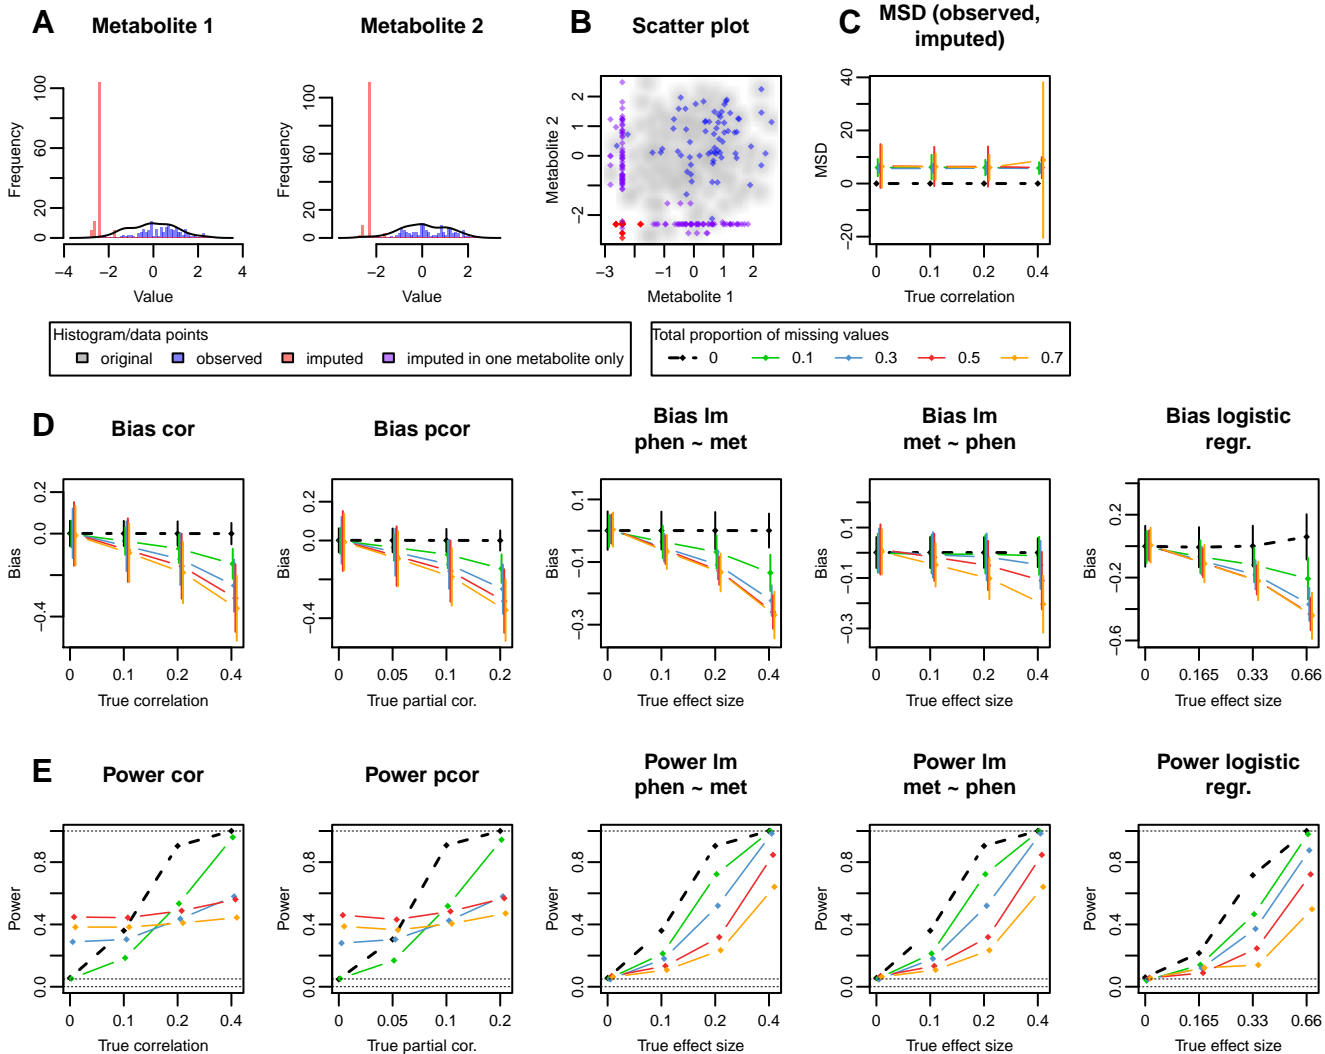

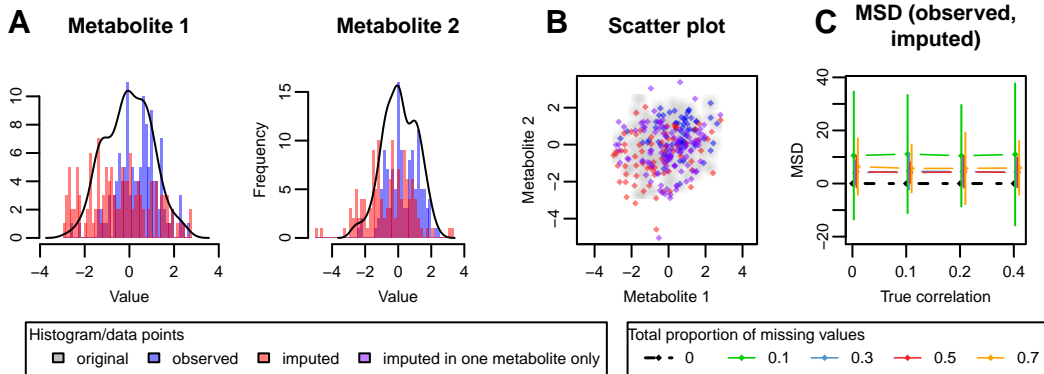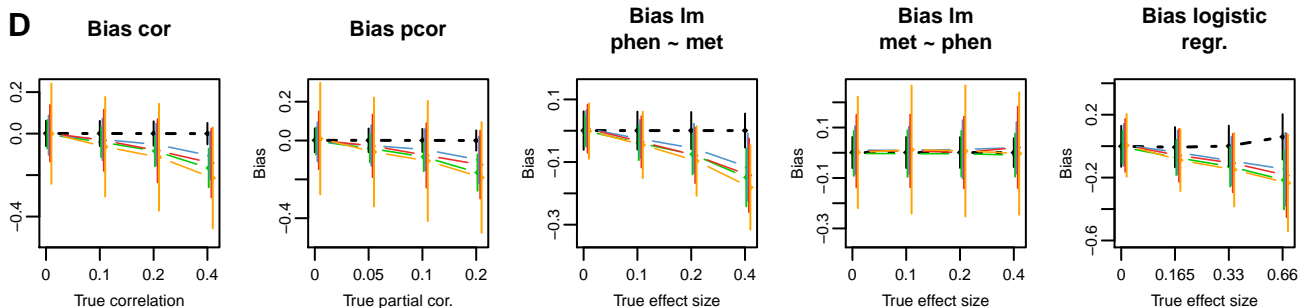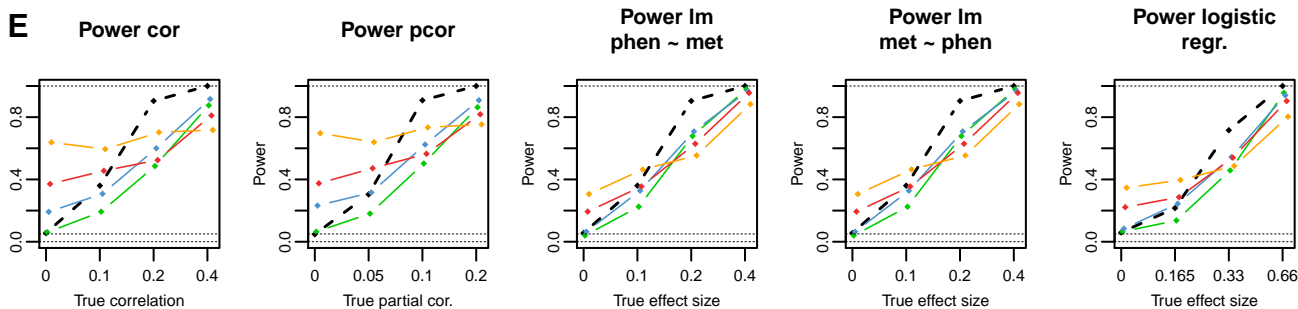

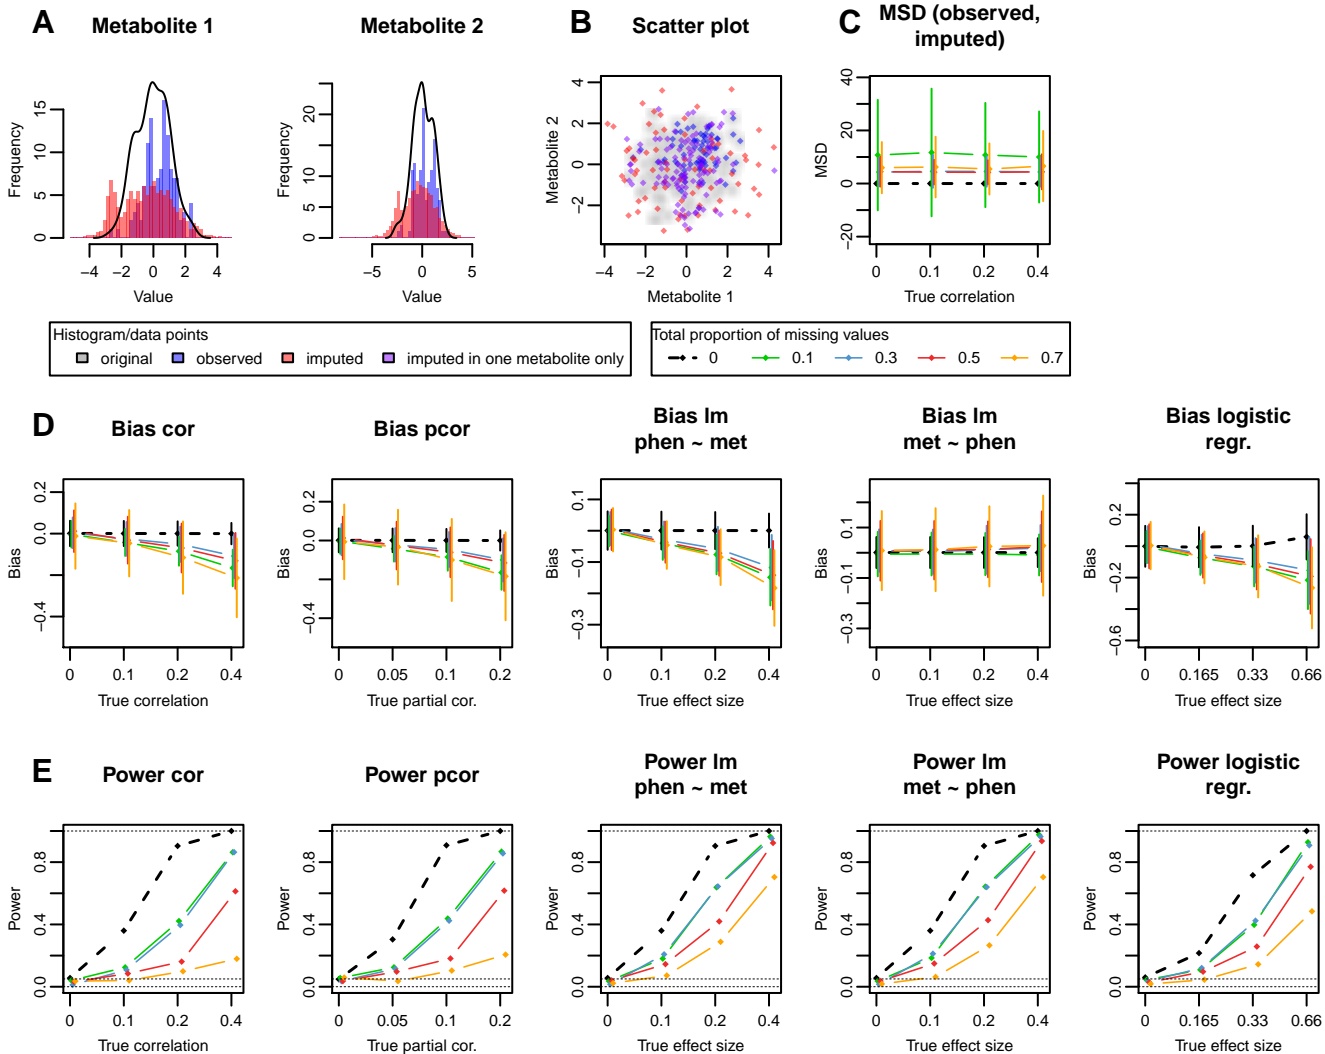

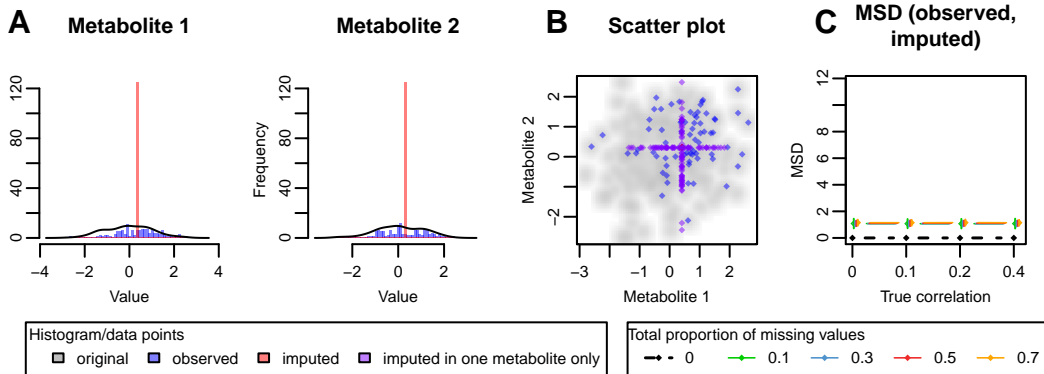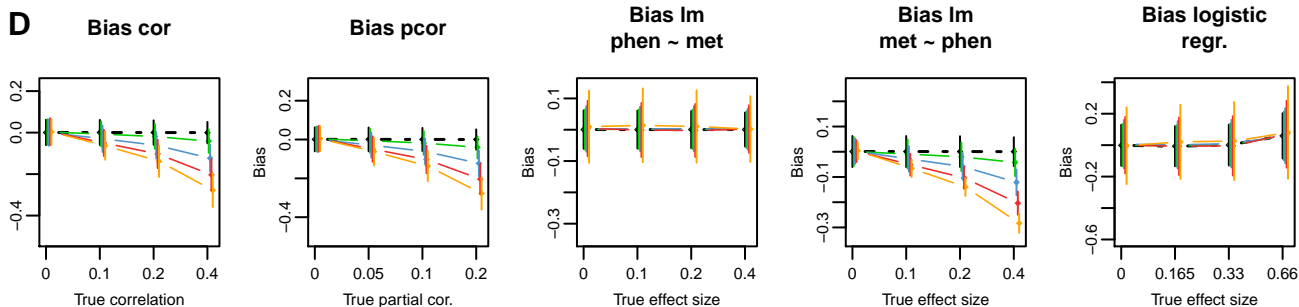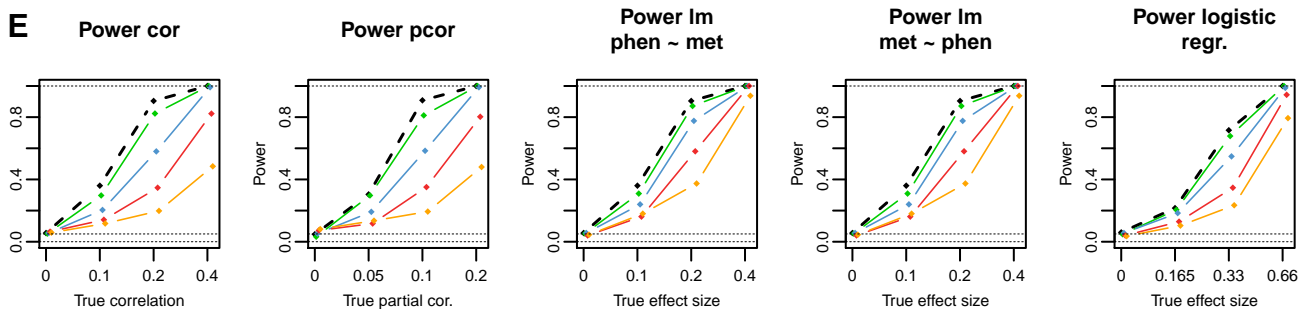



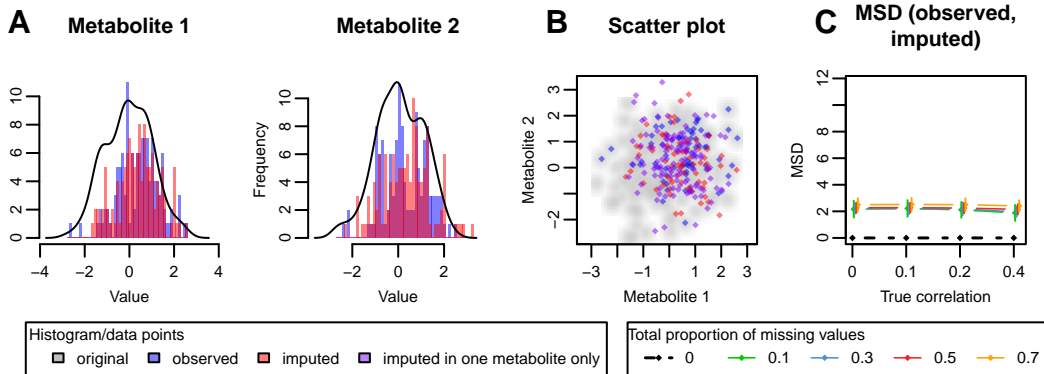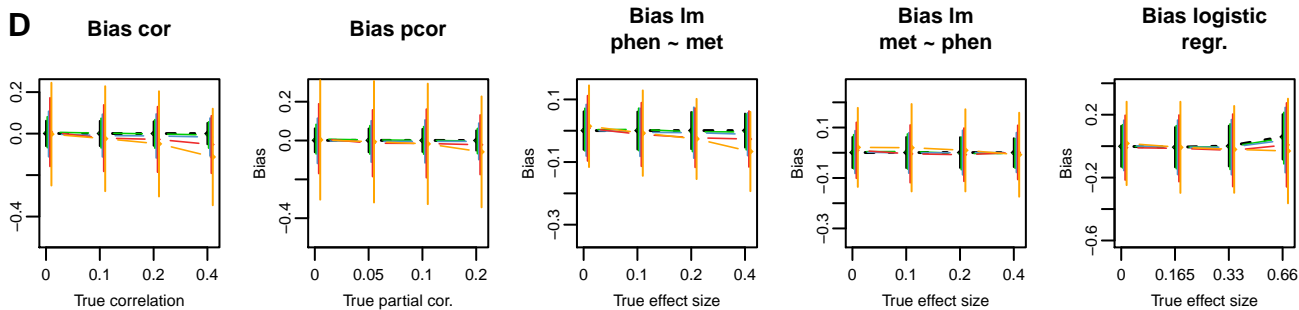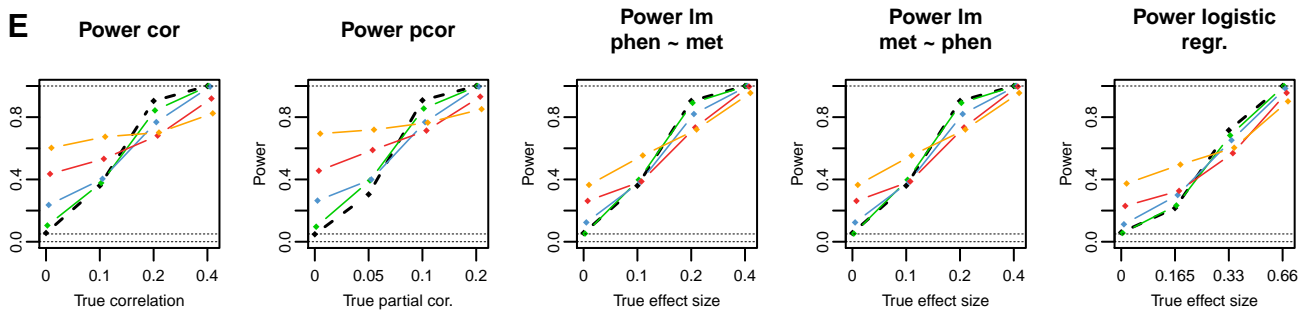

**A** Metabolite 1

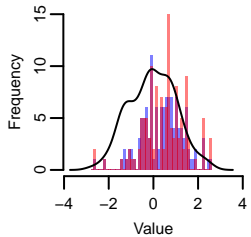

Metabolite 2

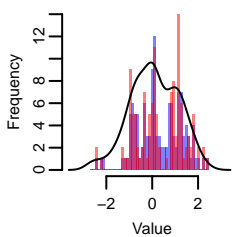

**B** Scatter plot

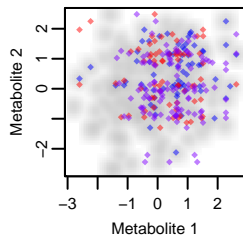

**C** MSD (observed, imputed)

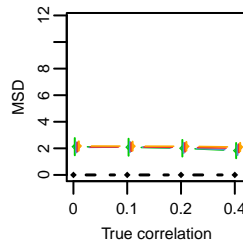

Histogram/data points

original observed imputed imputed in one metabolite only

Total proportion of missing values

0 0.1 0.3 0.5 0.7

**D** Bias cor

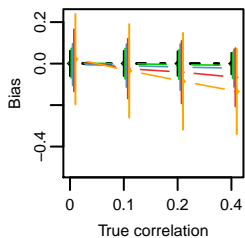

Bias pcor

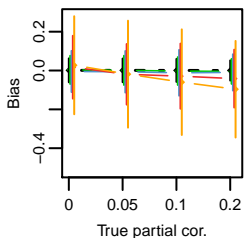

Bias lm phen ~ met

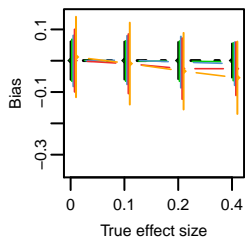

Bias lm met ~ phen

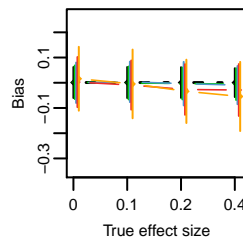

Bias logistic regr.

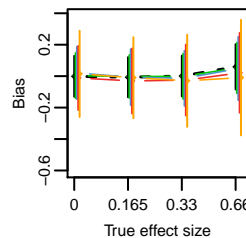

**E** Power cor

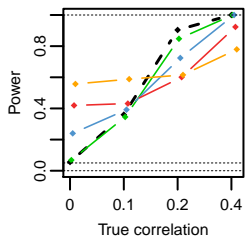

Power pcor

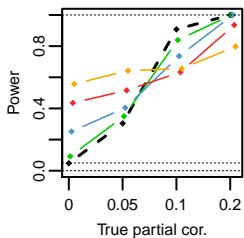

Power lm phen ~ met

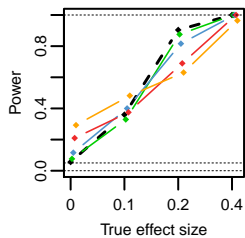

Power lm met ~ phen

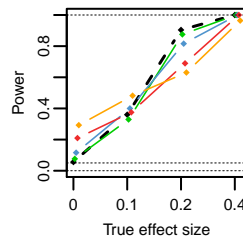

Power logistic regr.

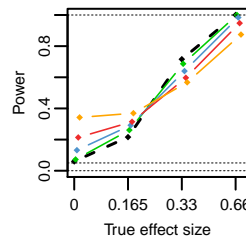

**A** Metabolite 1

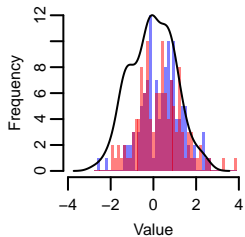

Metabolite 2

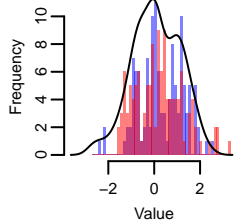

**B** Scatter plot

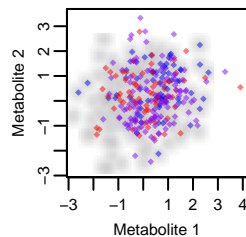

**C** MSD (observed, imputed)

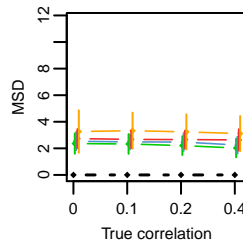

Histogram/data points  
 ■ original ■ observed ■ imputed ■ imputed in one metabolite only

Total proportion of missing values  
 - - 0 — 0.1 — 0.3 — 0.5 — 0.7

**D** Bias cor

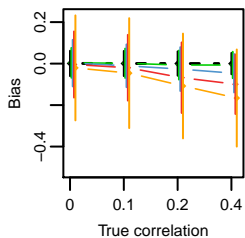

Bias pcor

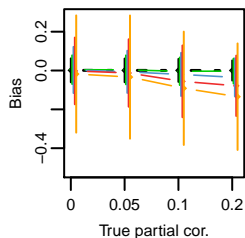

Bias lm phen ~ met

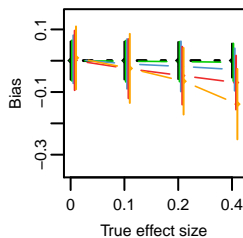

Bias lm met ~ phen

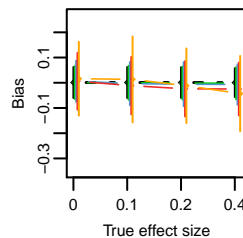

Bias logistic regr.

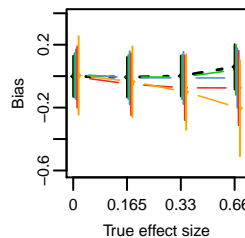

**E** Power cor

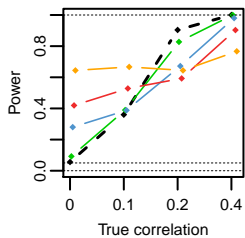

Power pcor

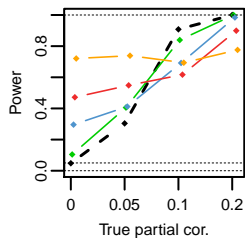

Power lm phen ~ met

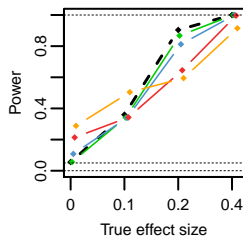

Power lm met ~ phen

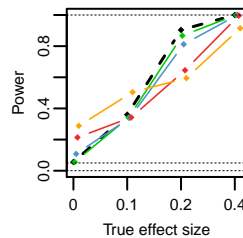

Power logistic regr.

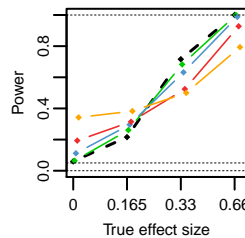

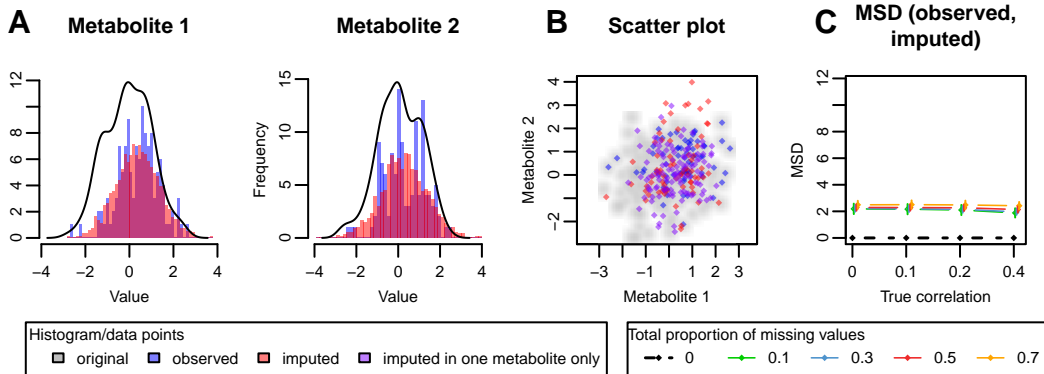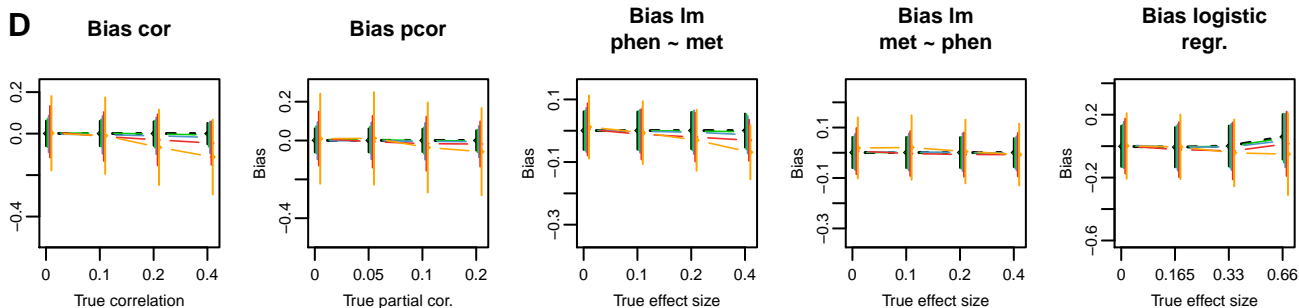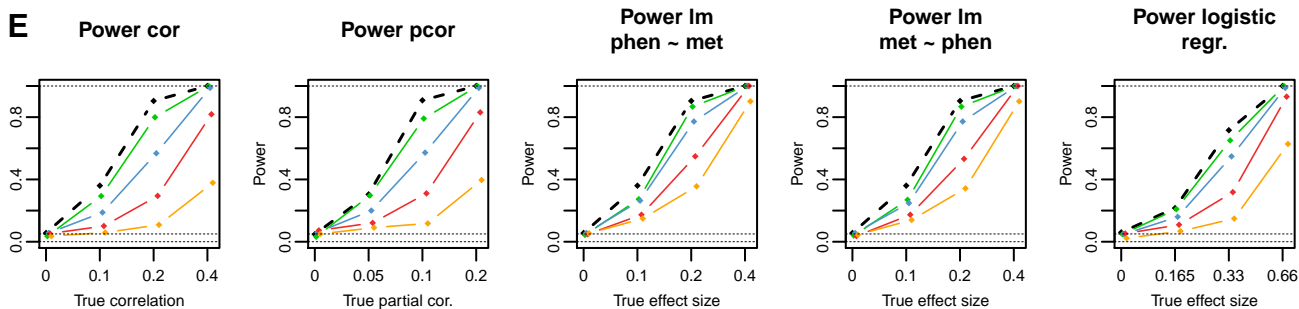

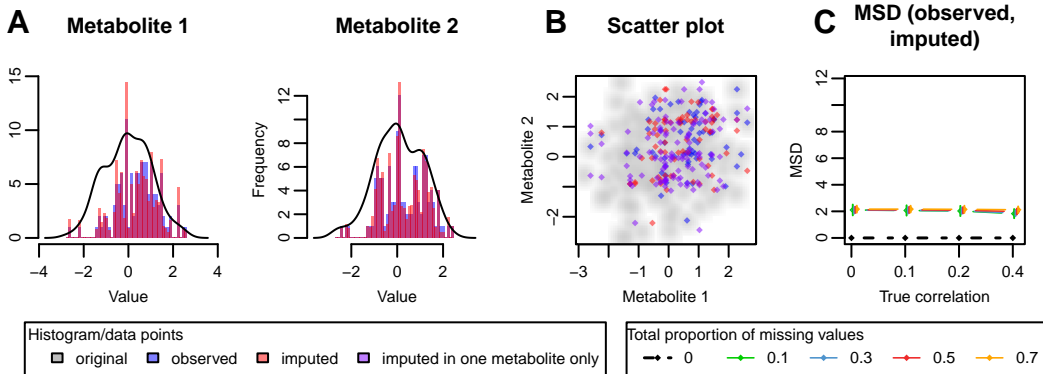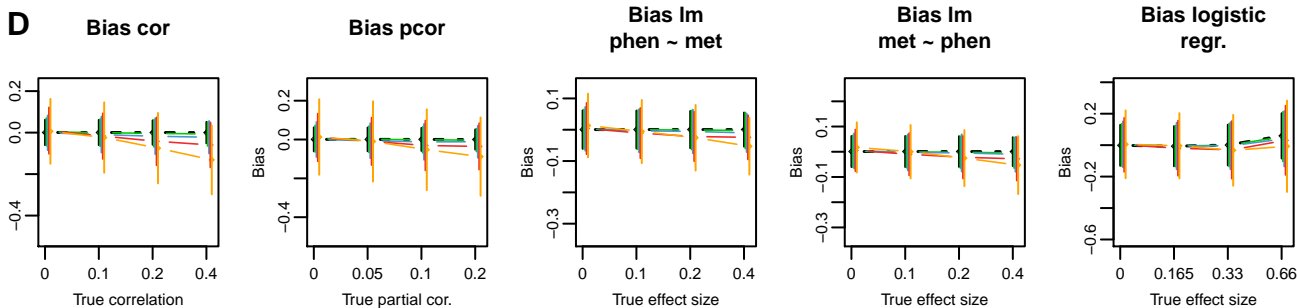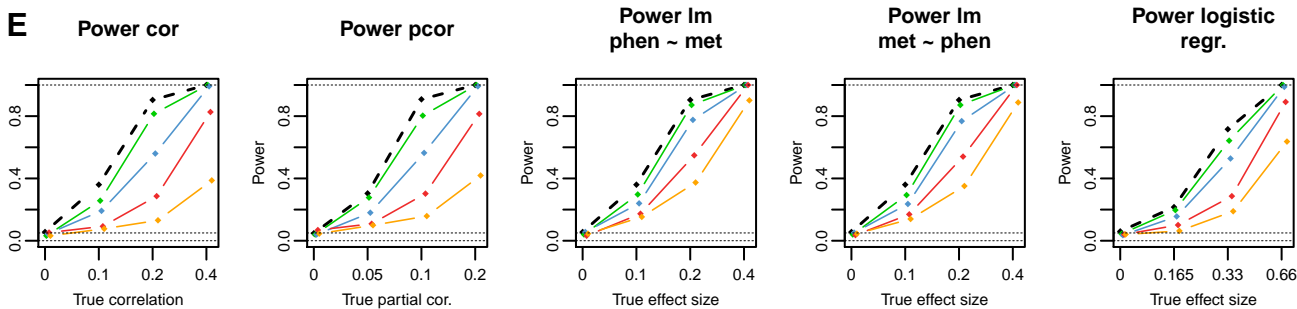

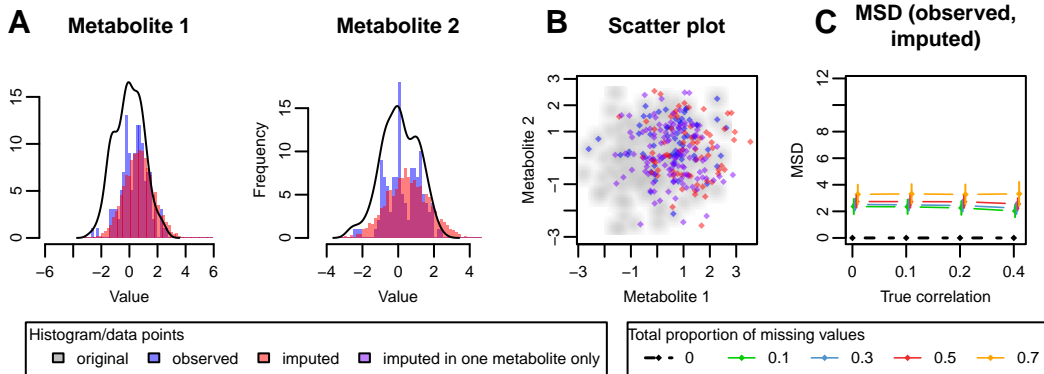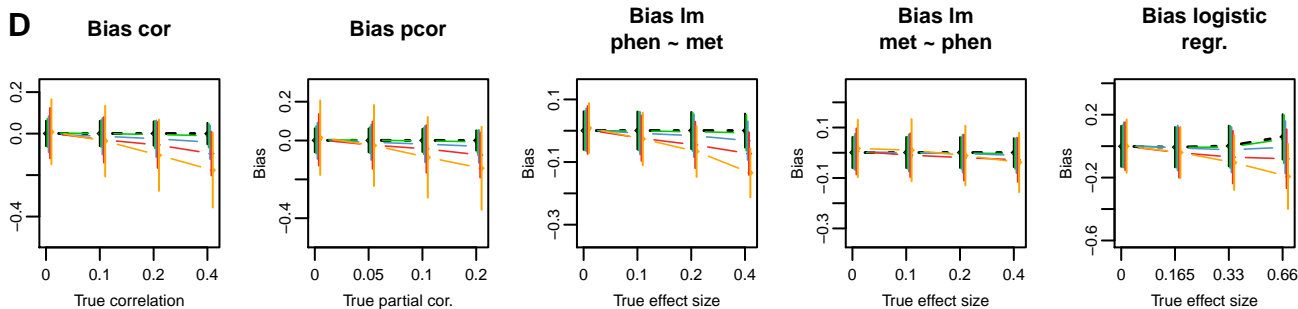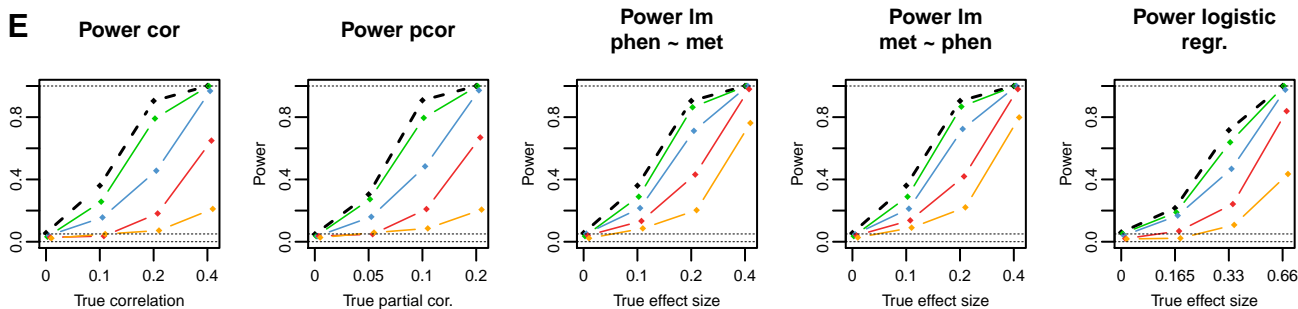

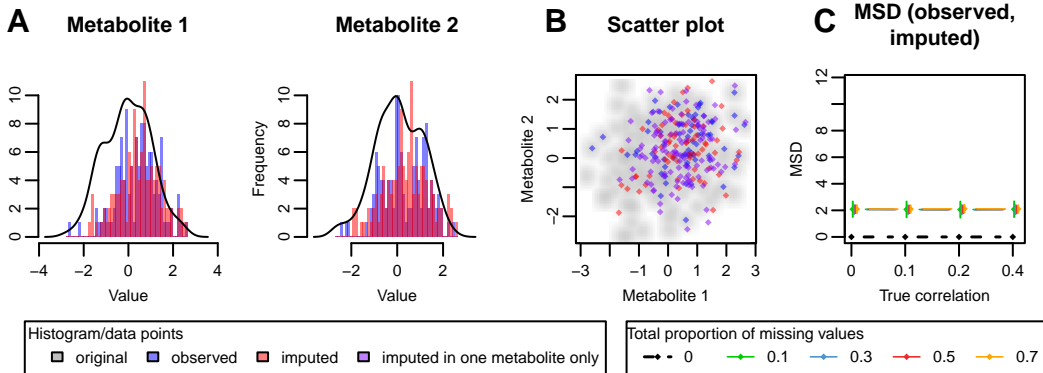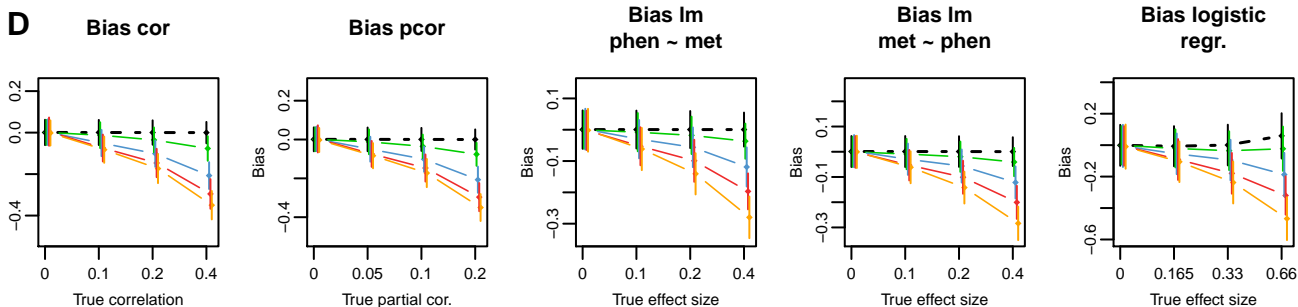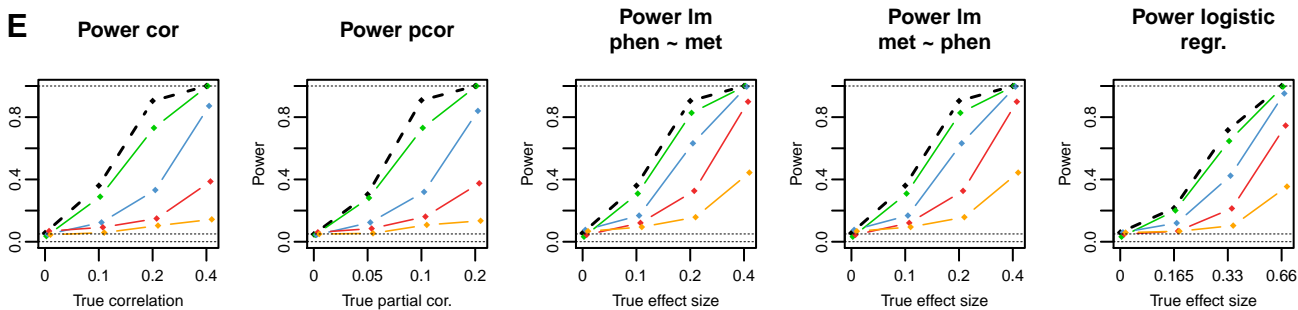

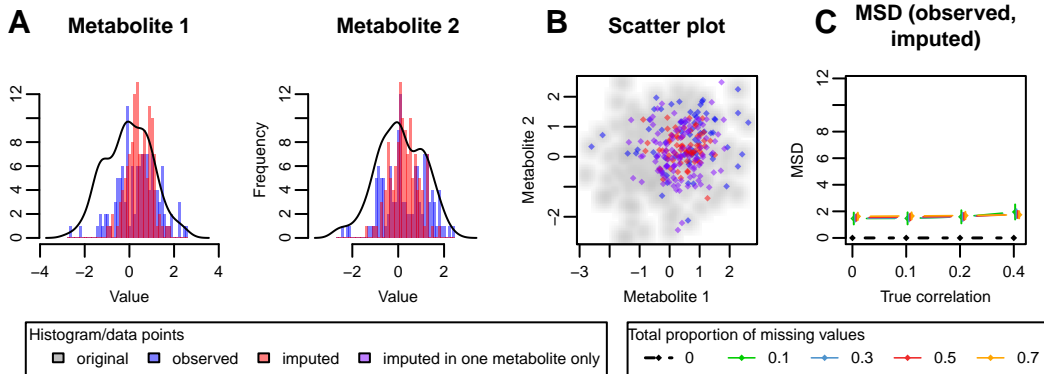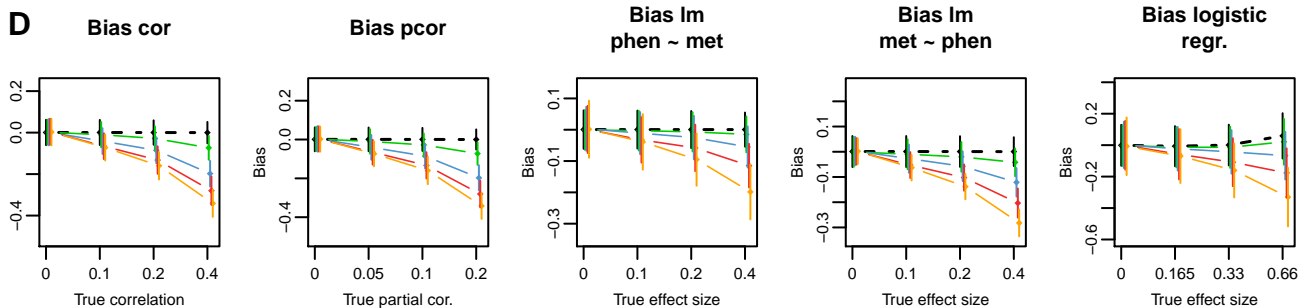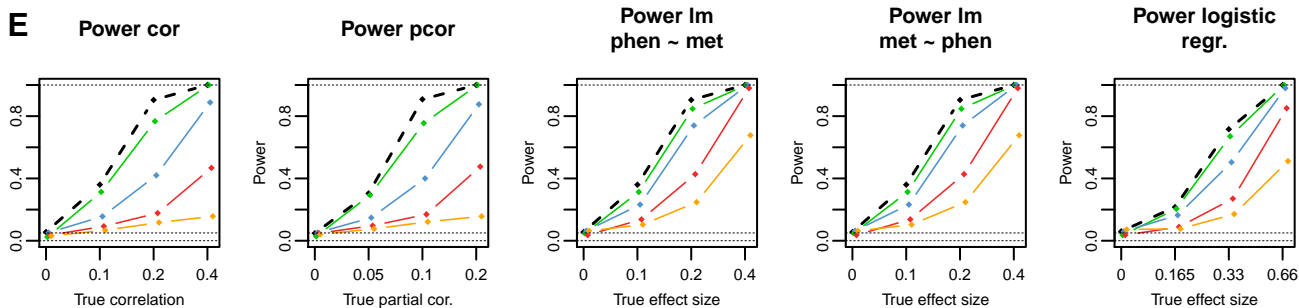



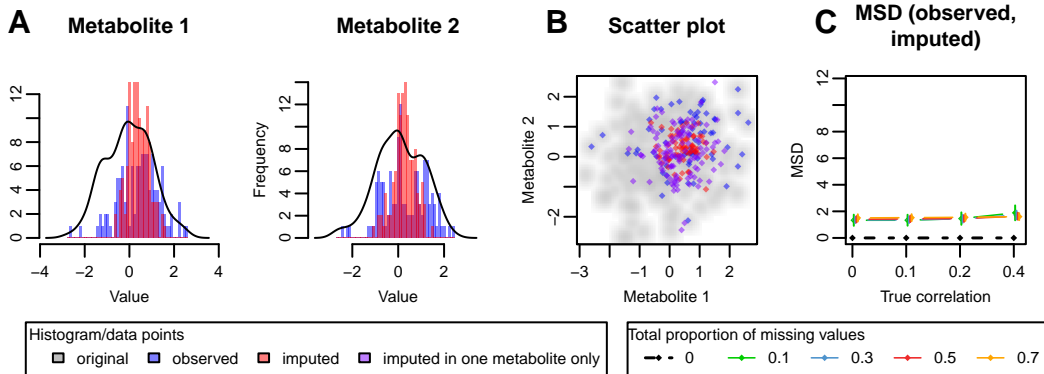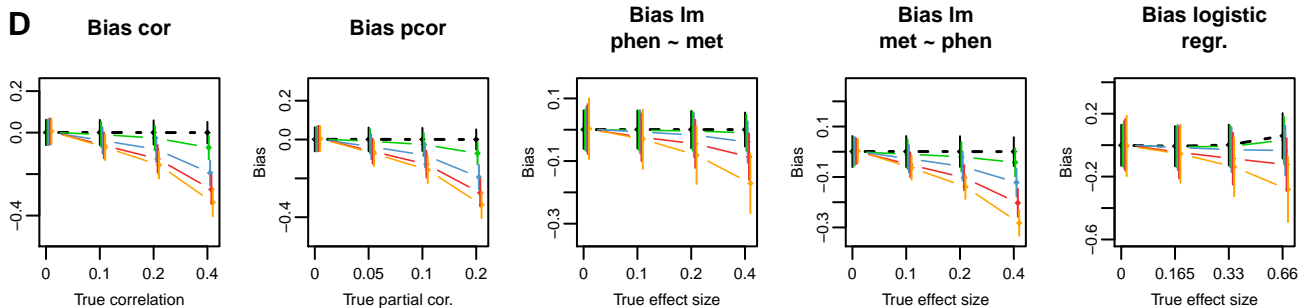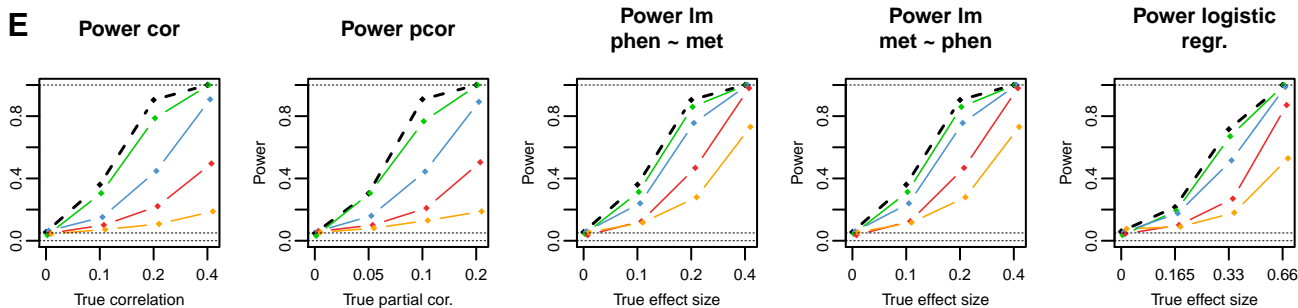

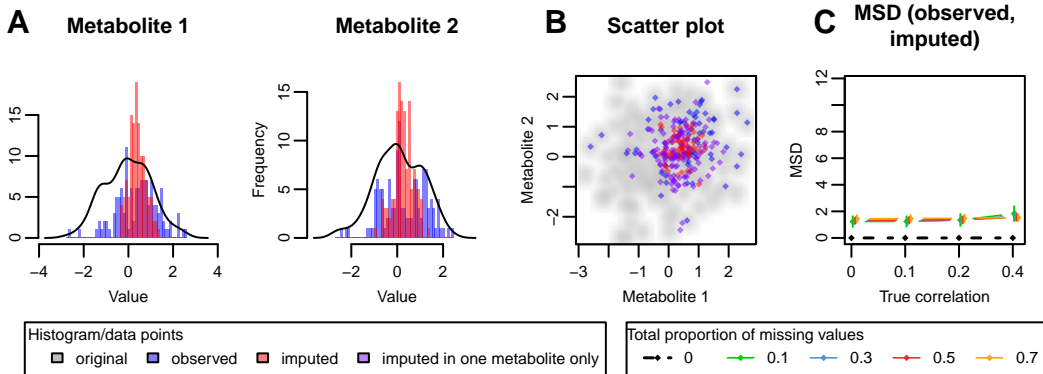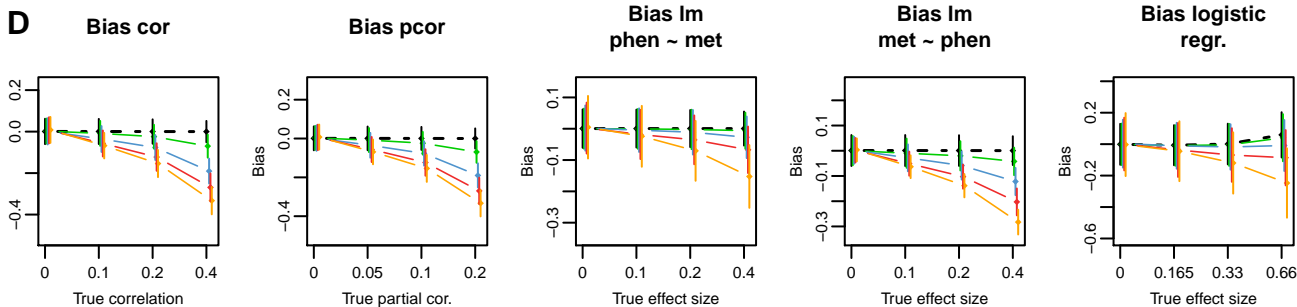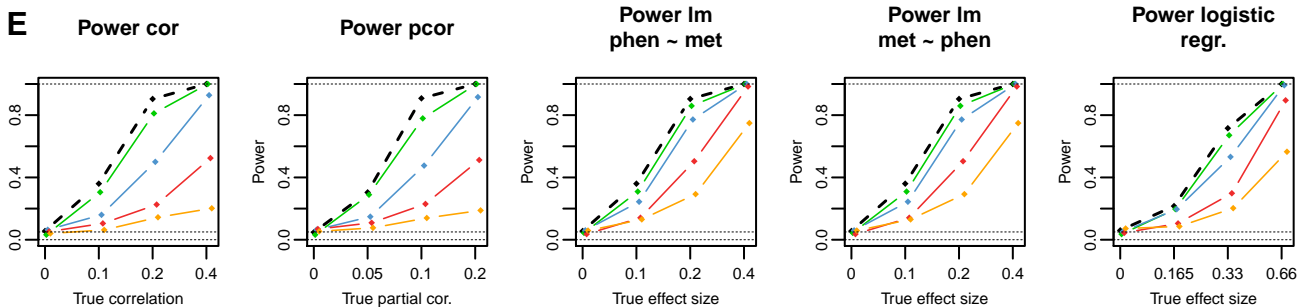

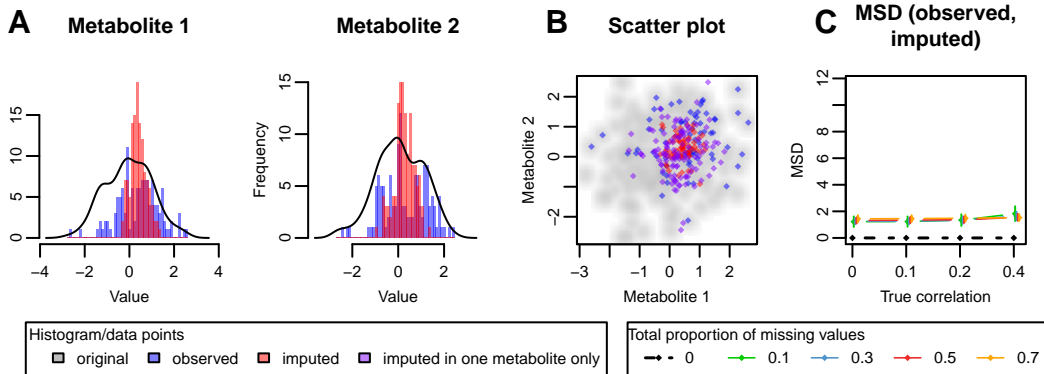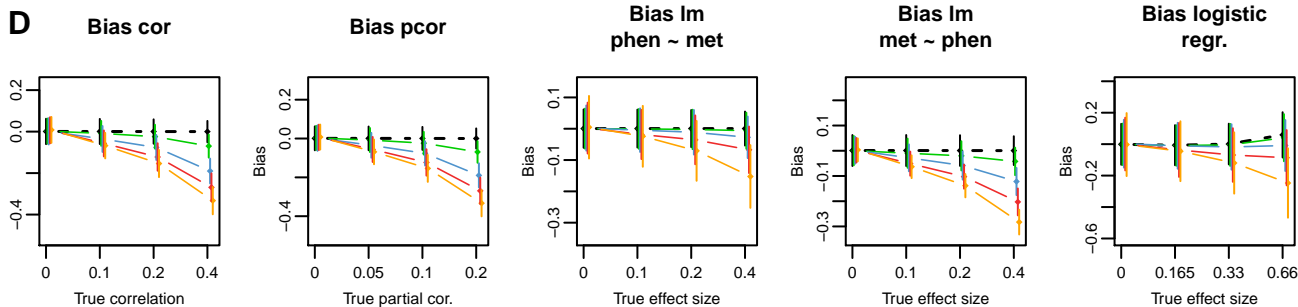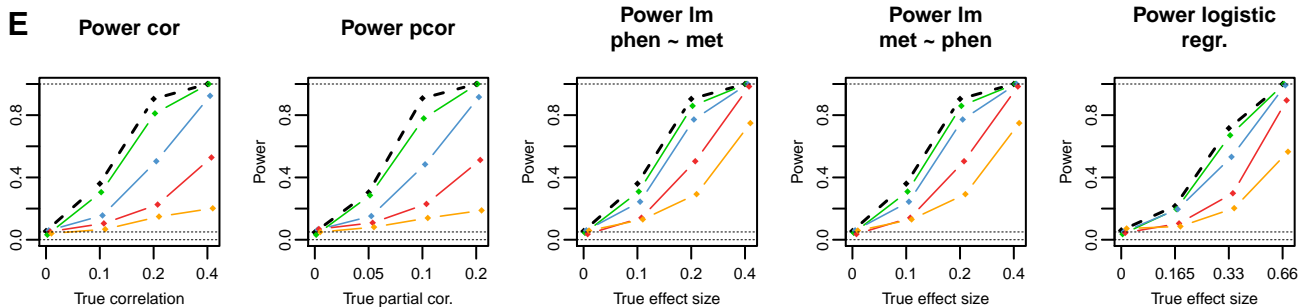

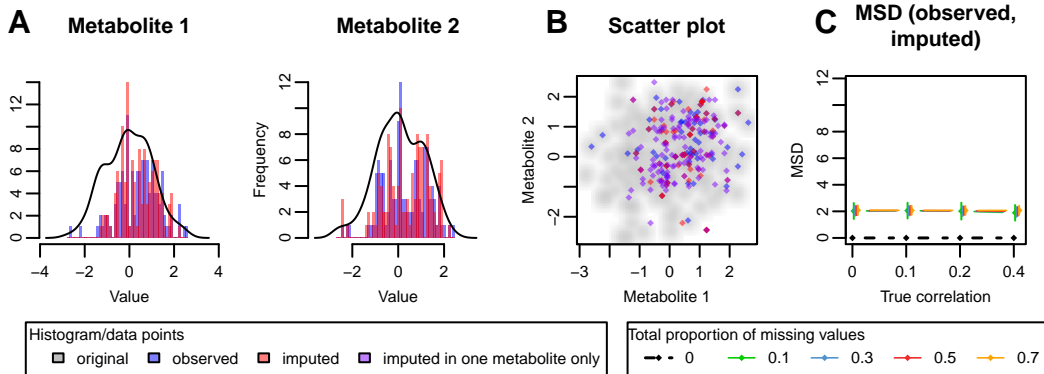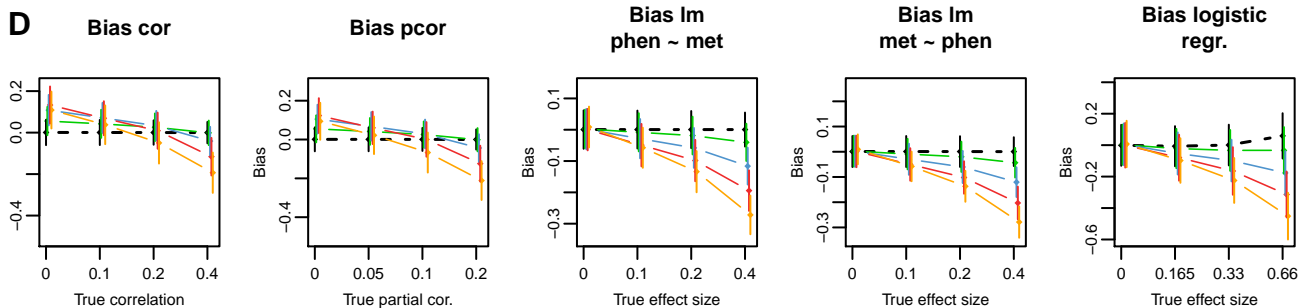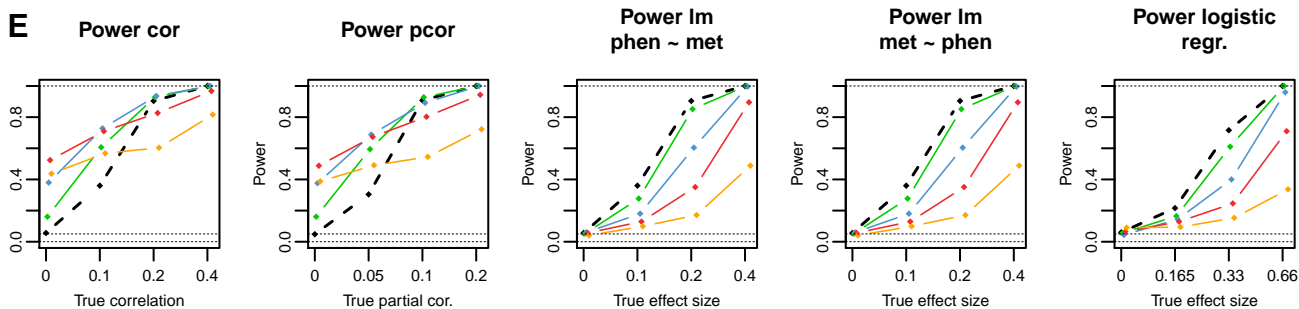

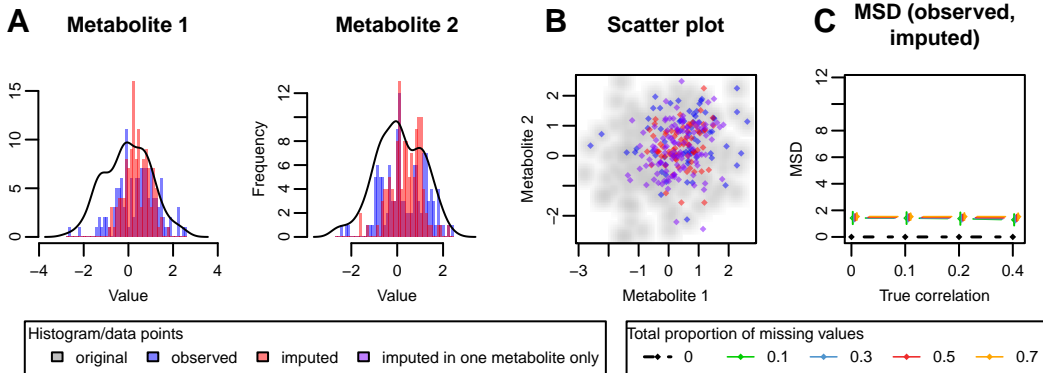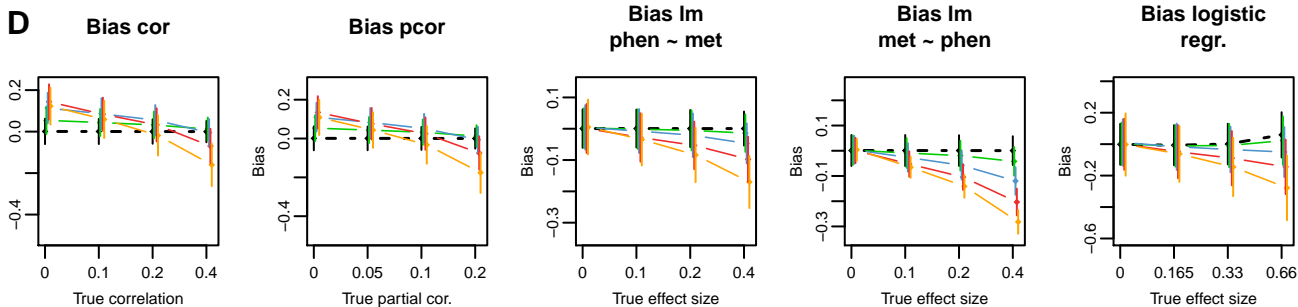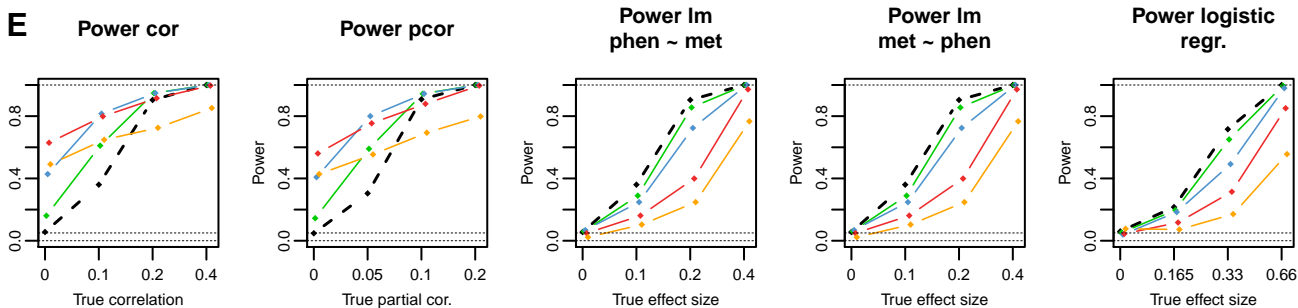

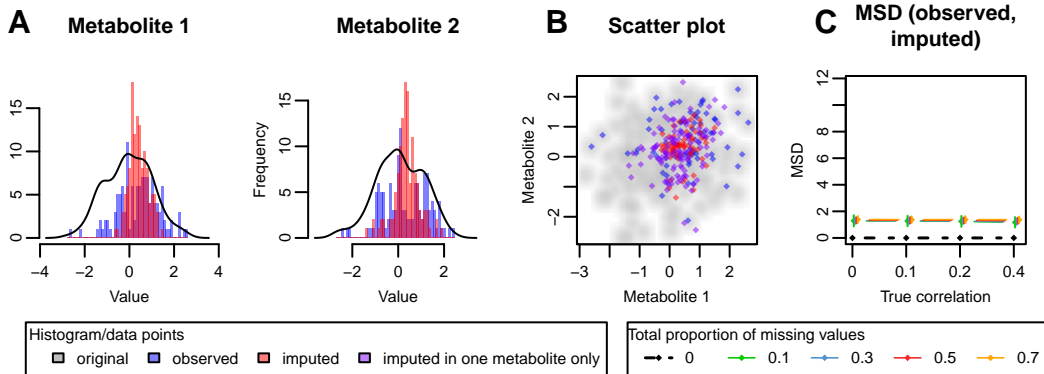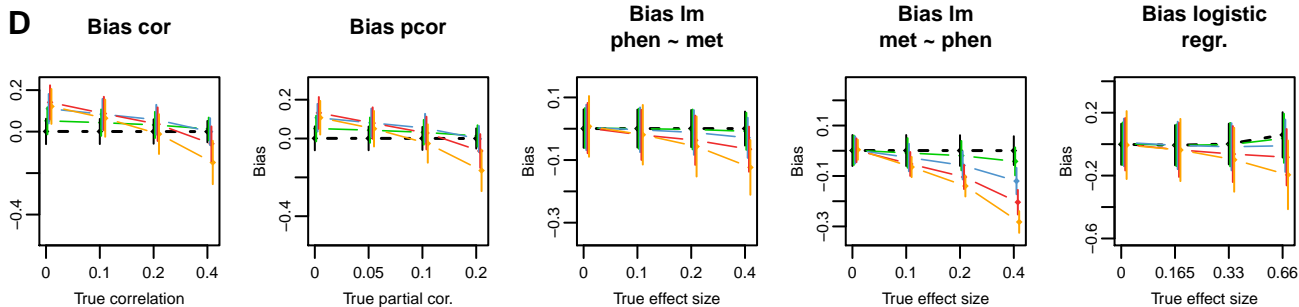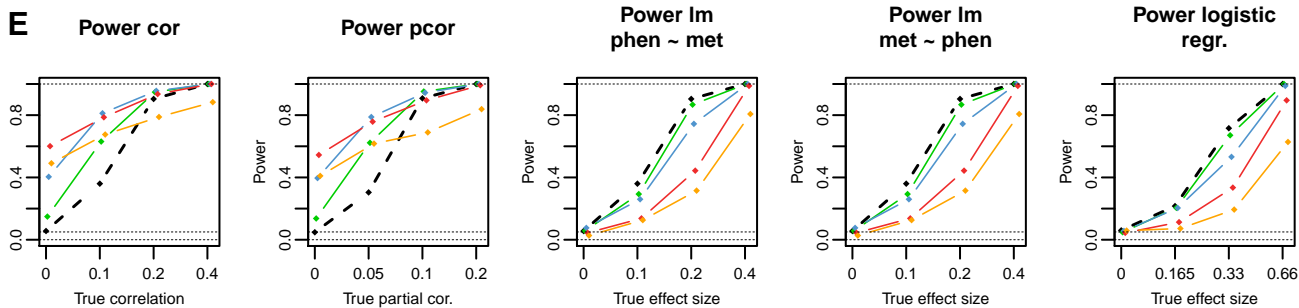

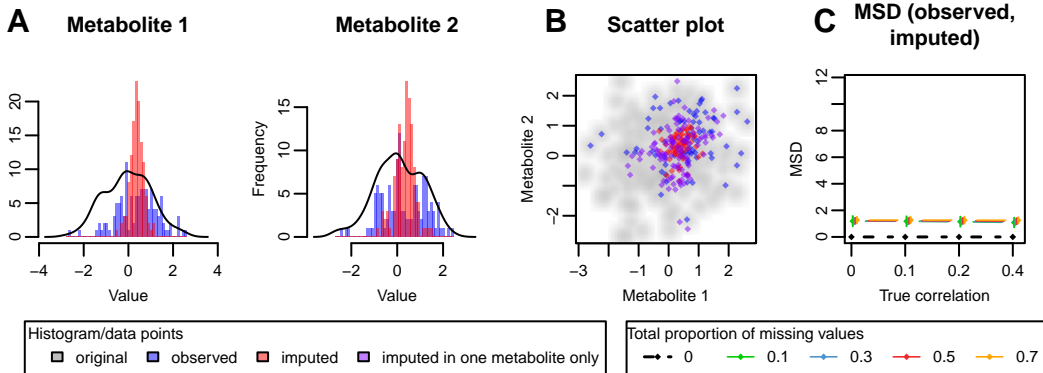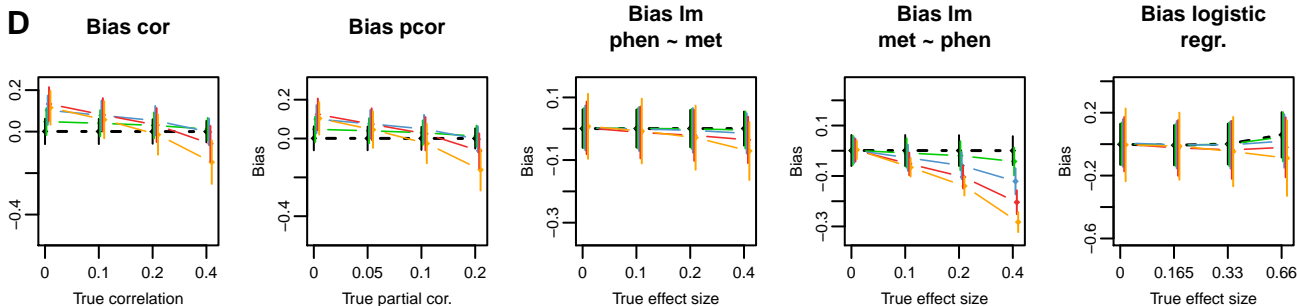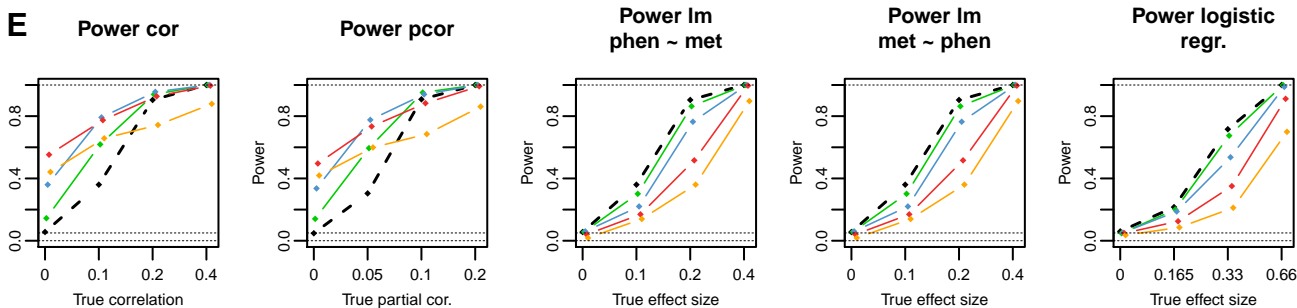

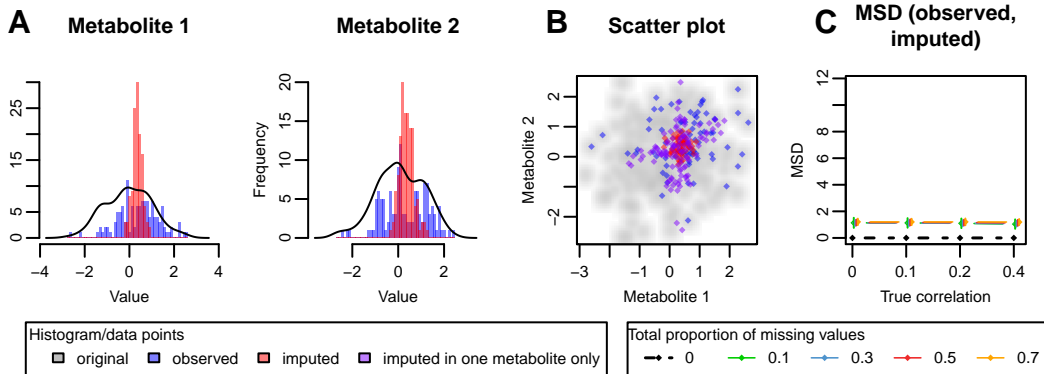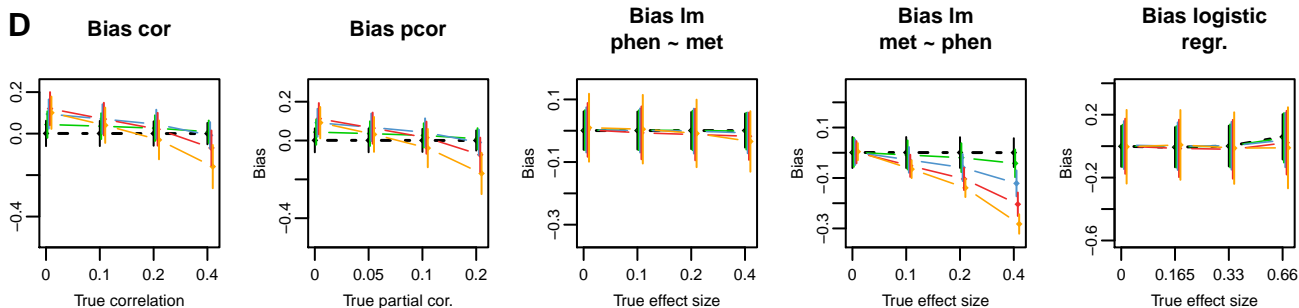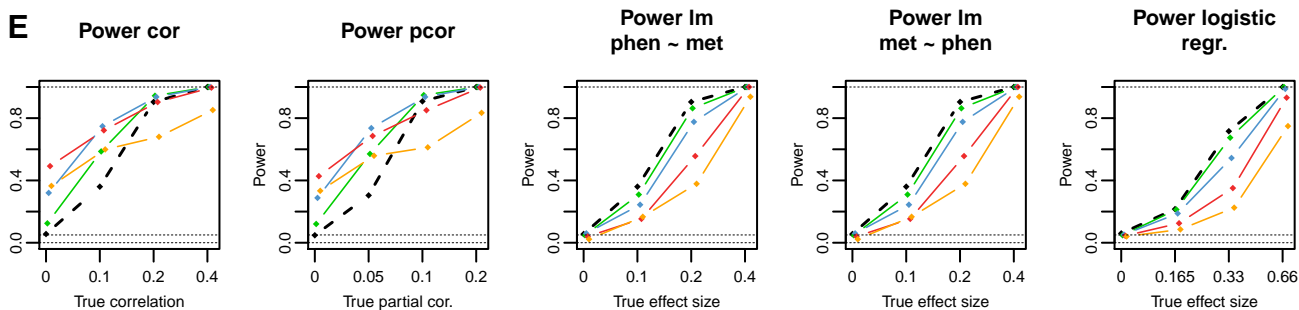



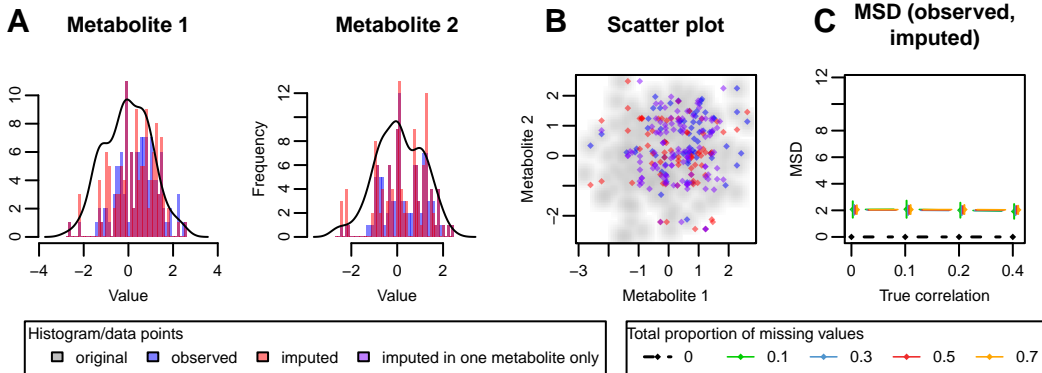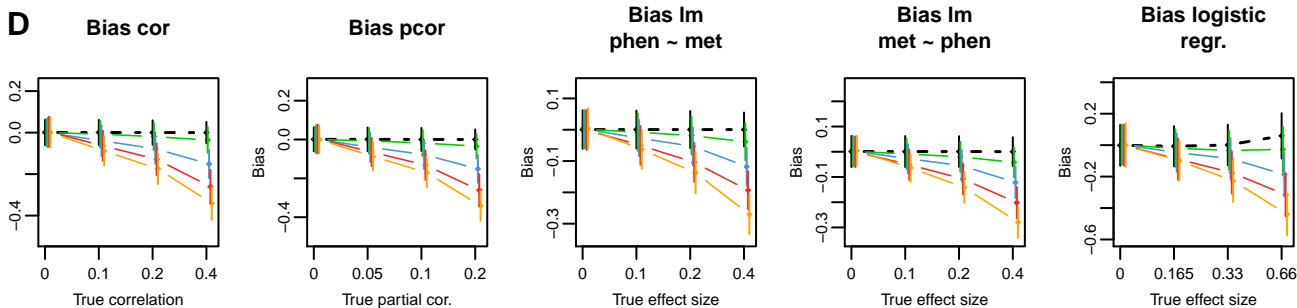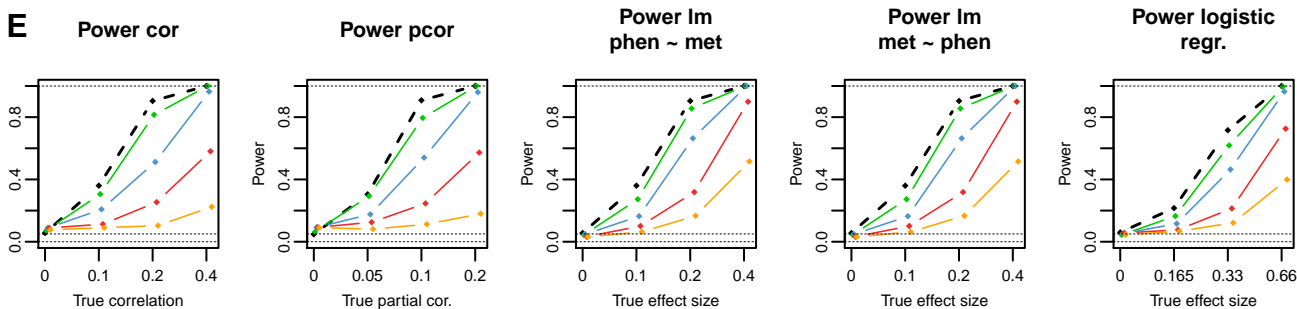

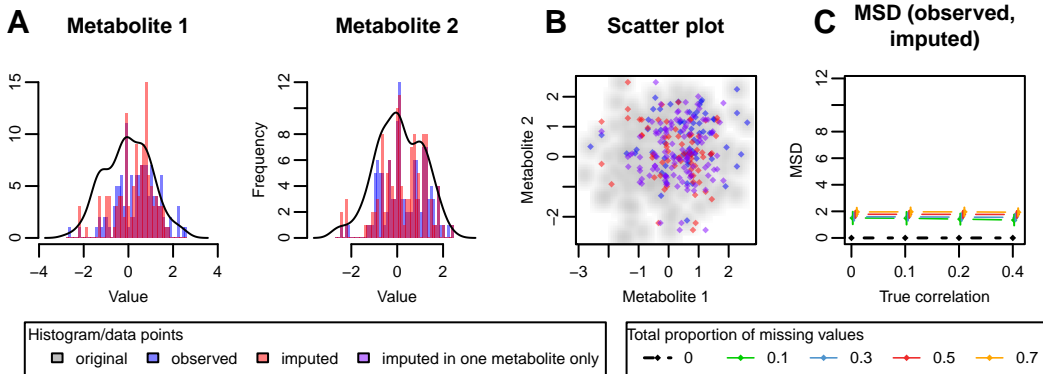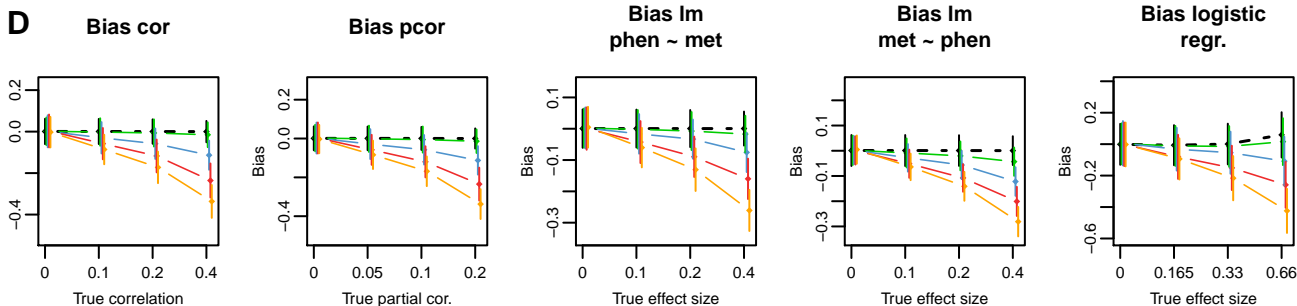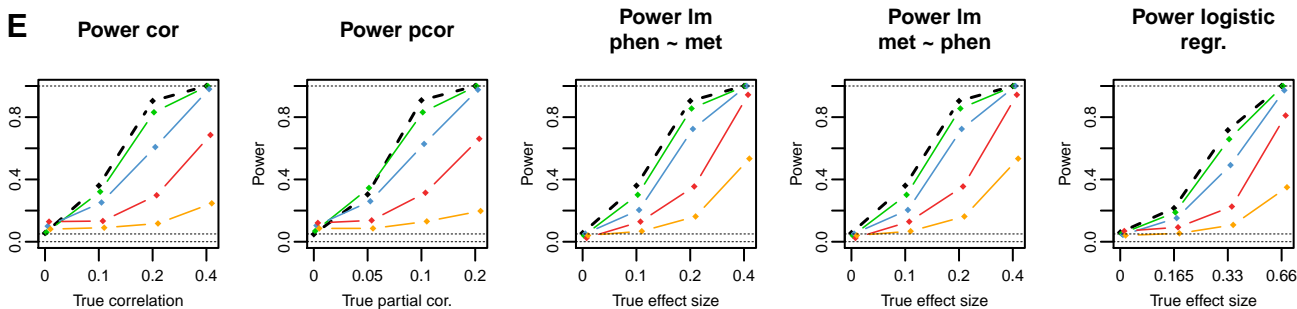

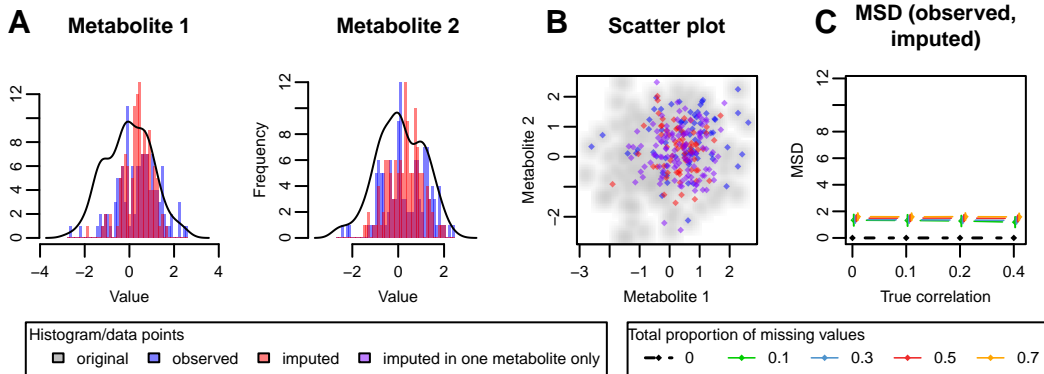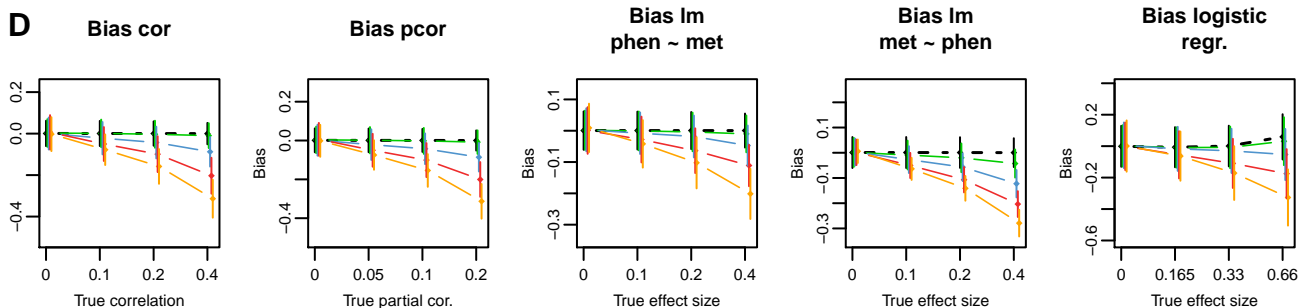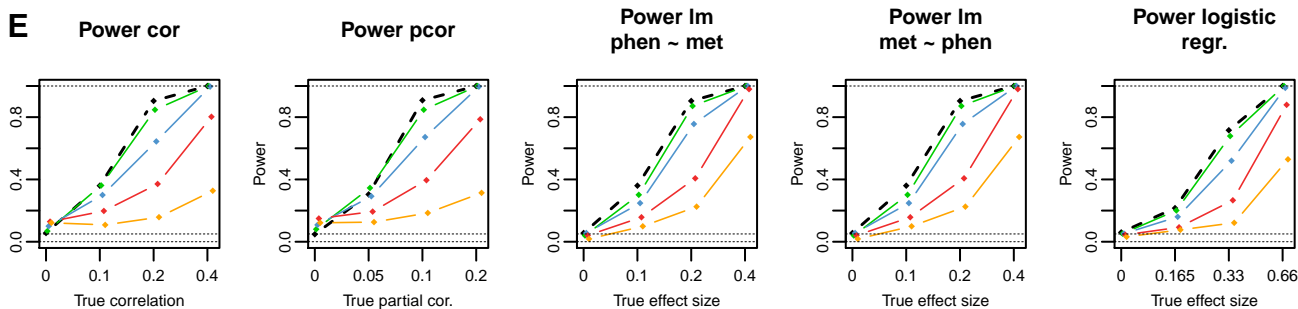

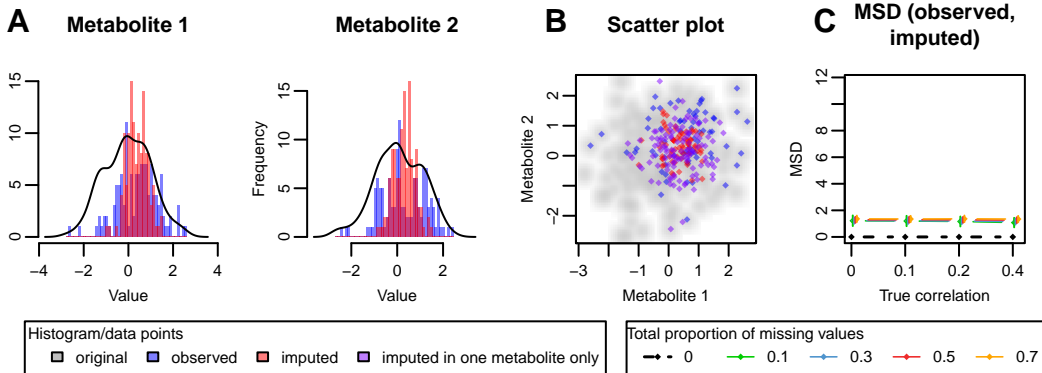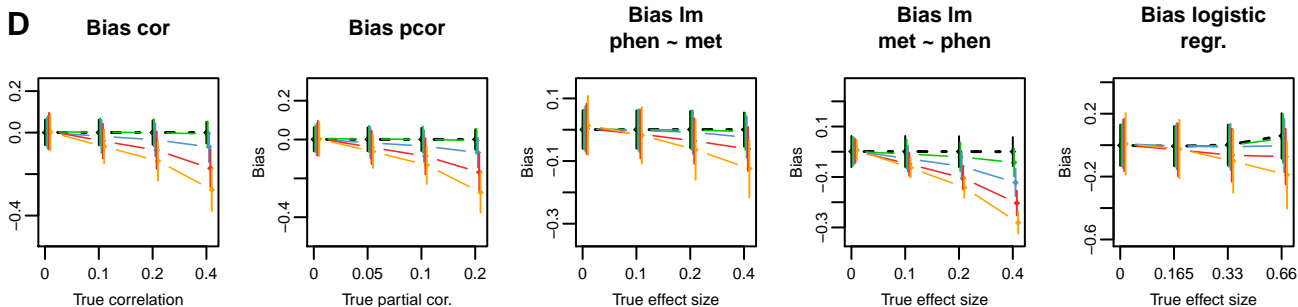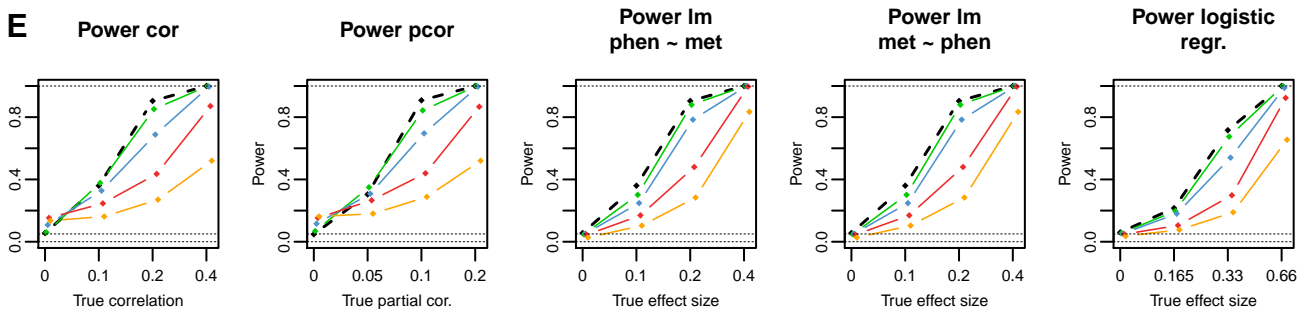

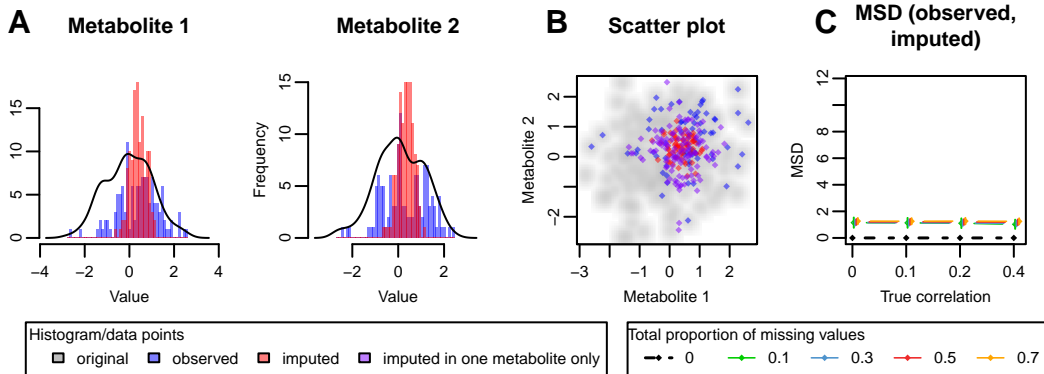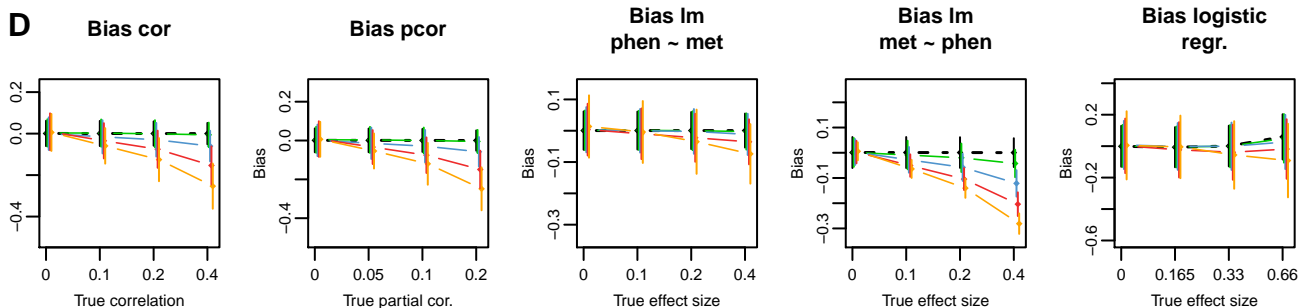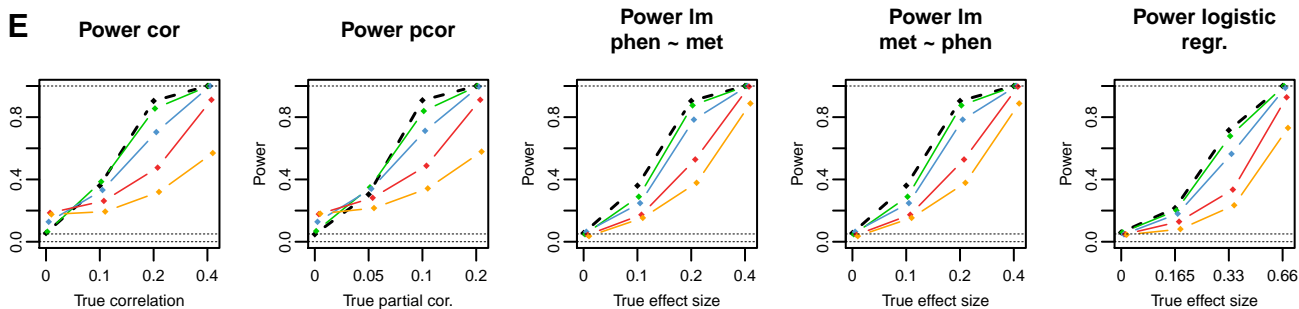

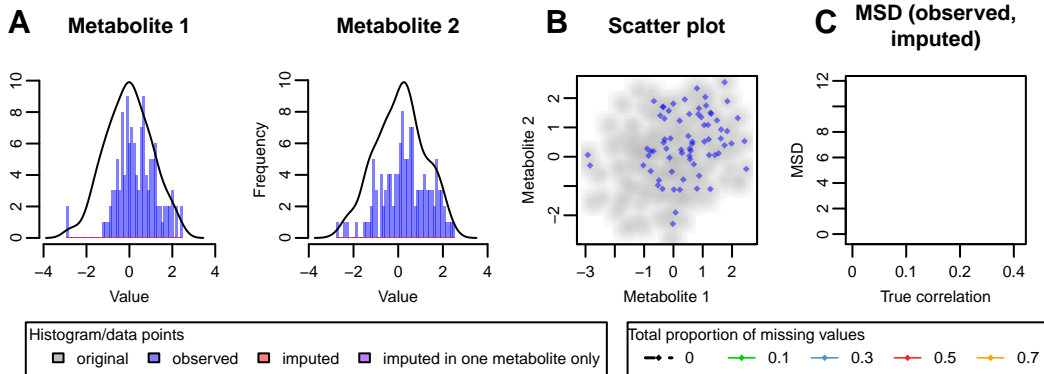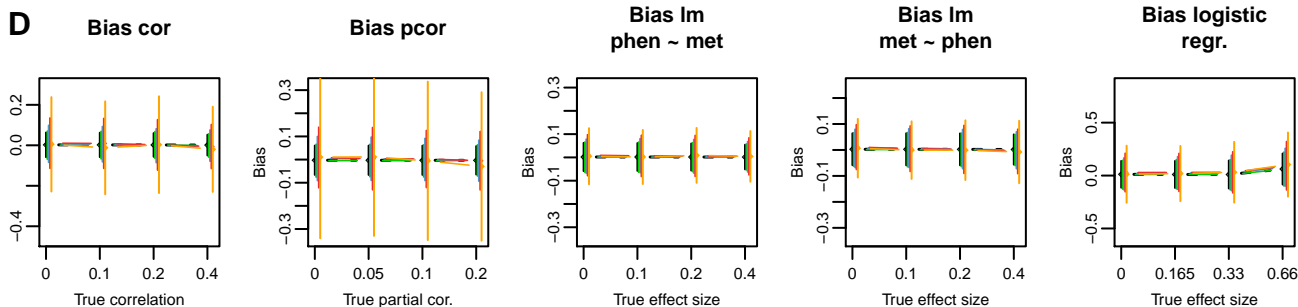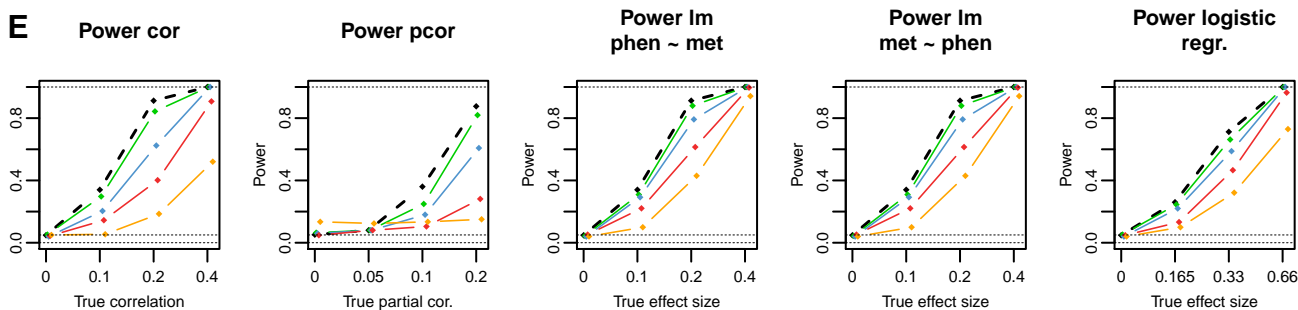

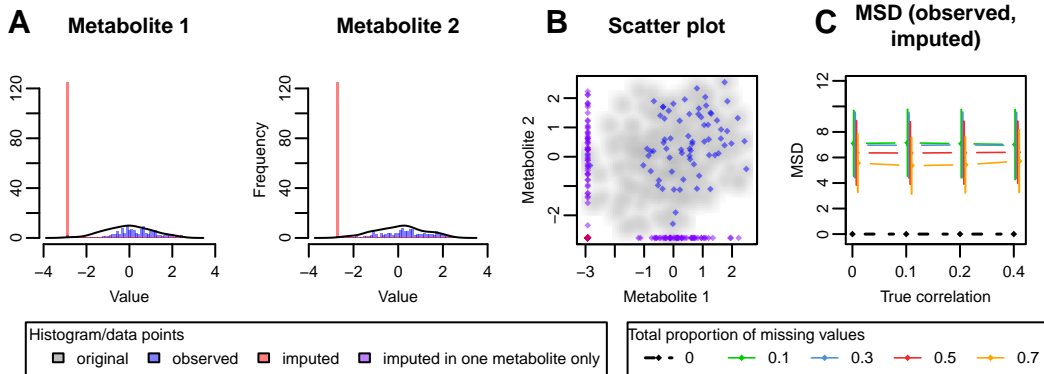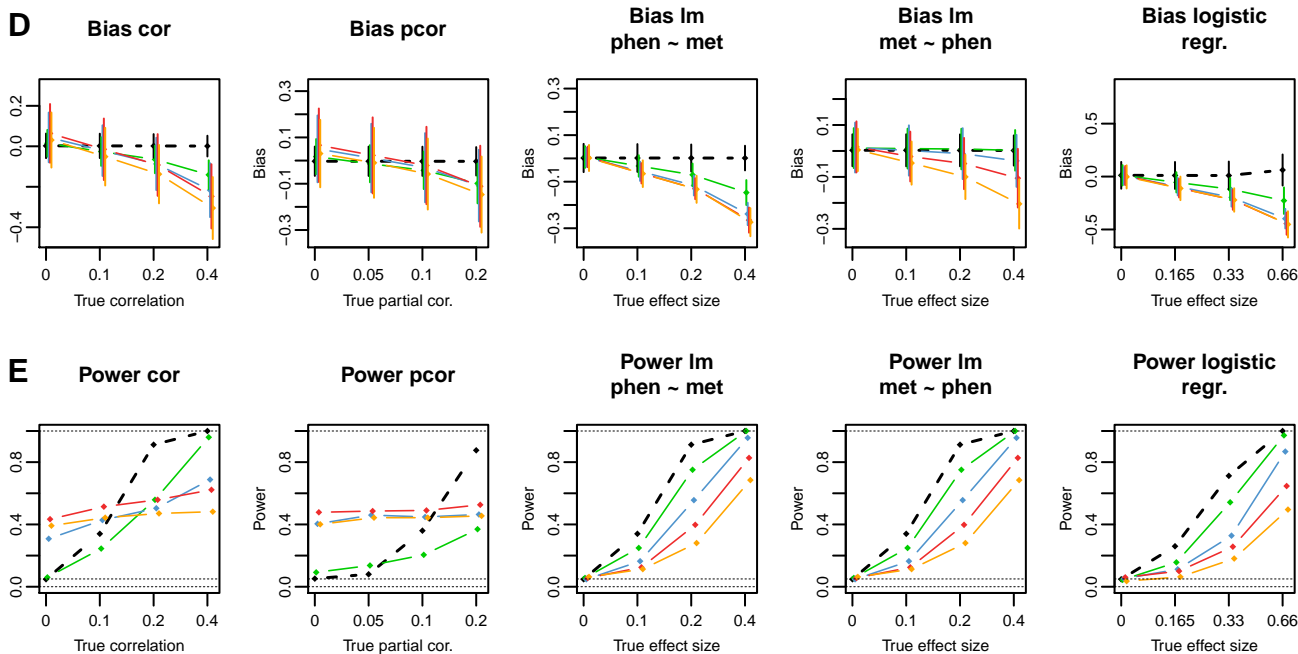

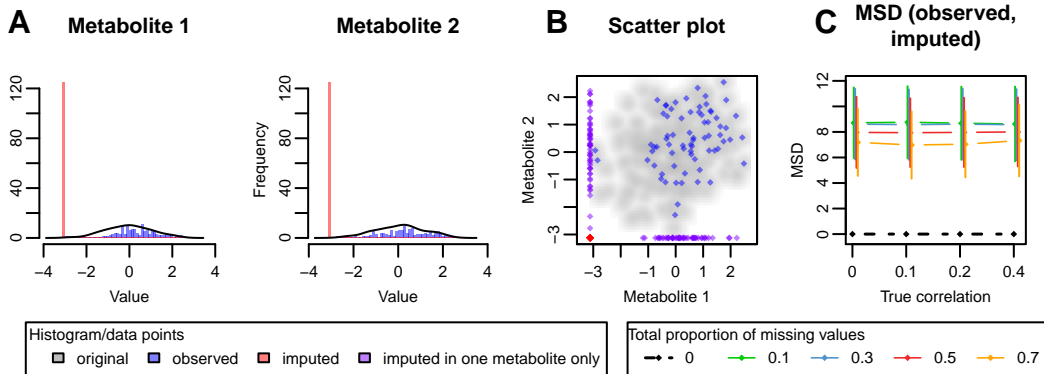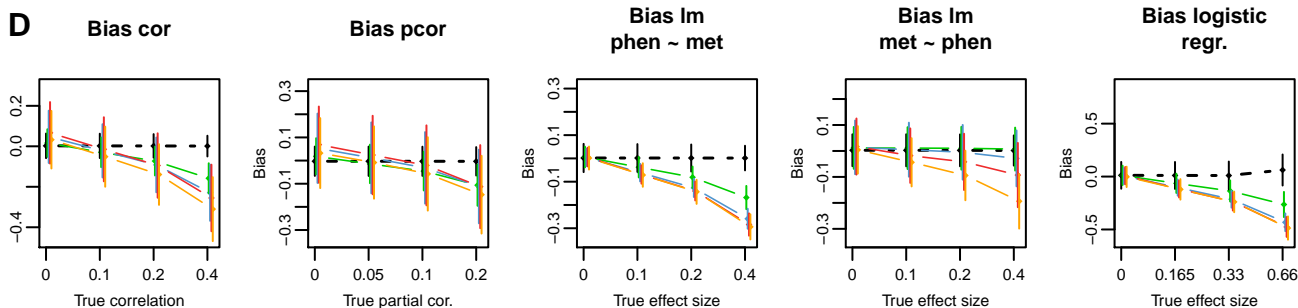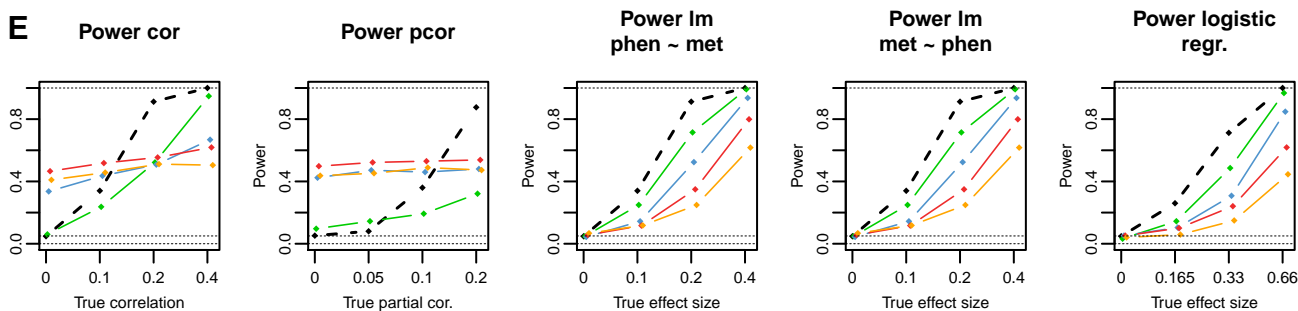



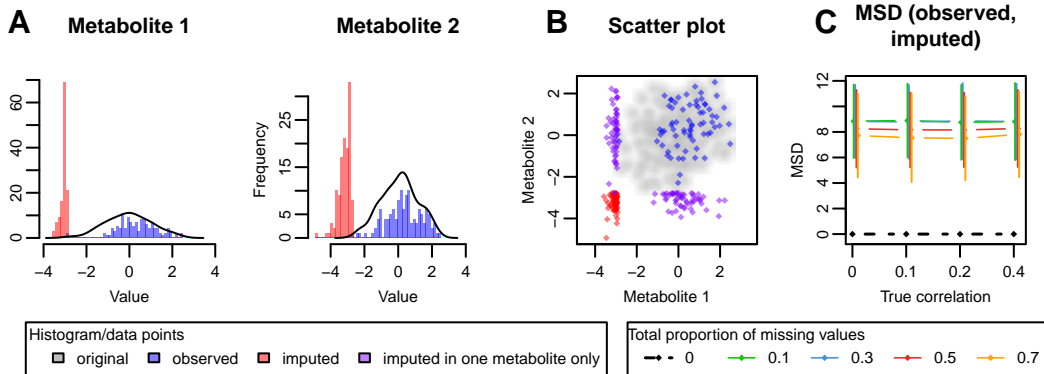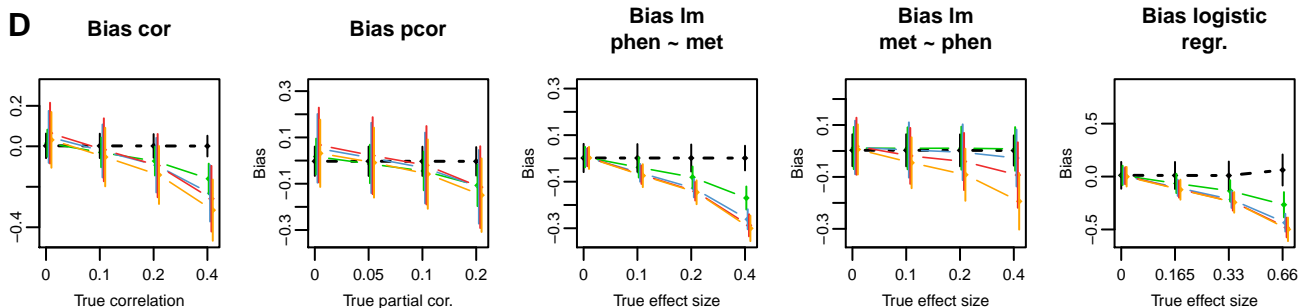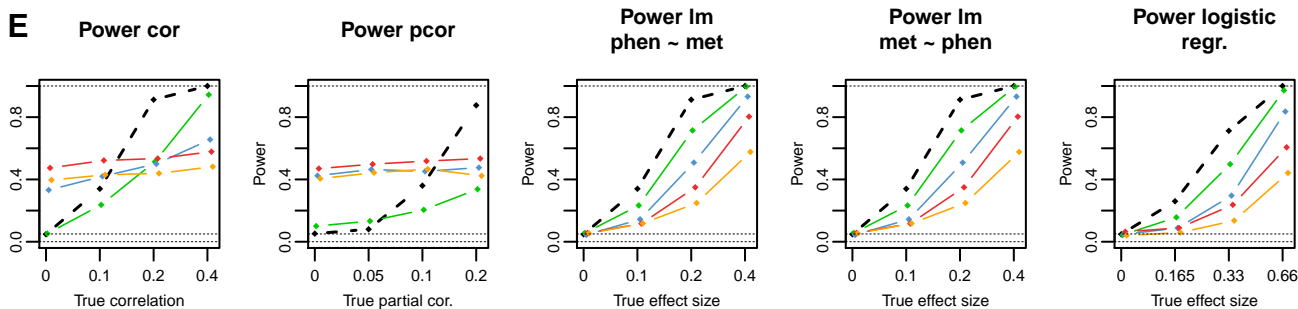

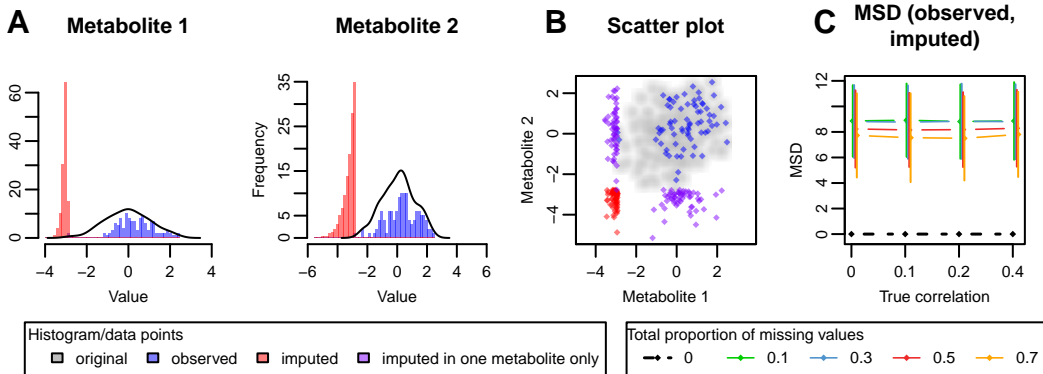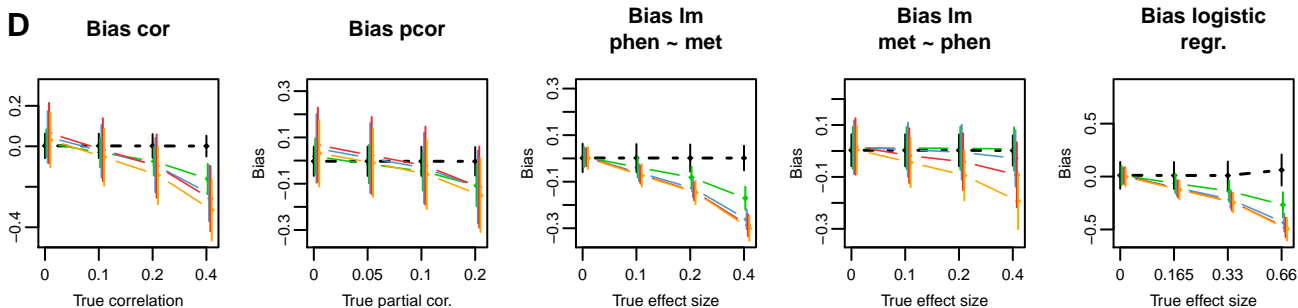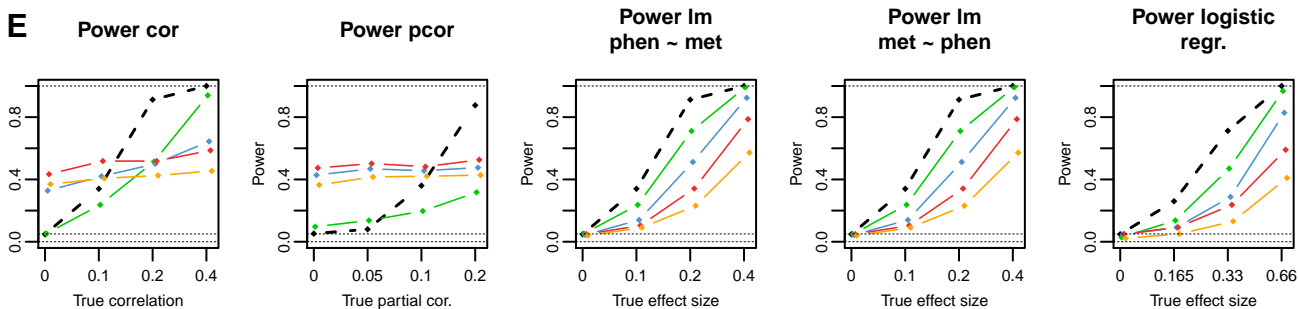

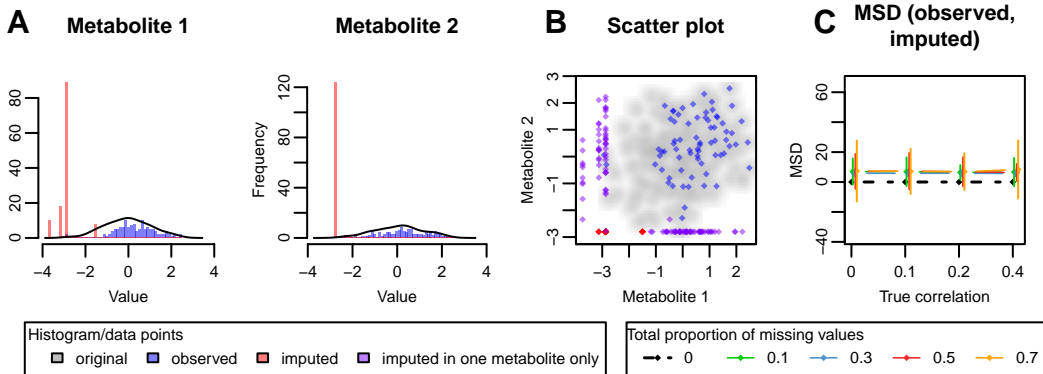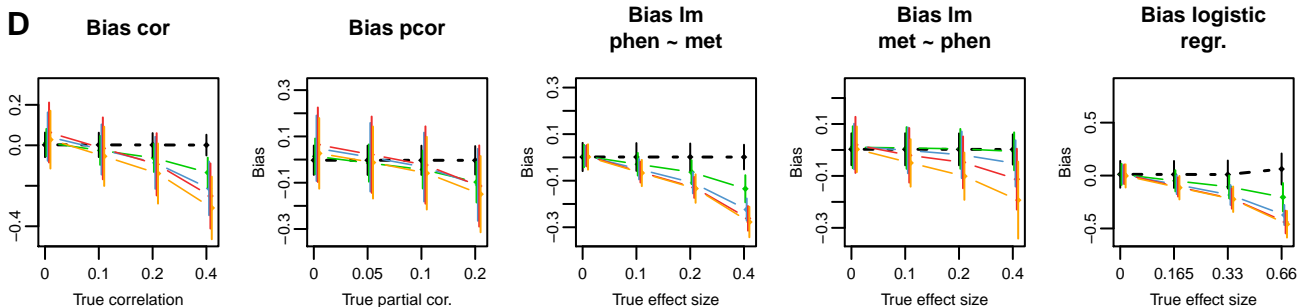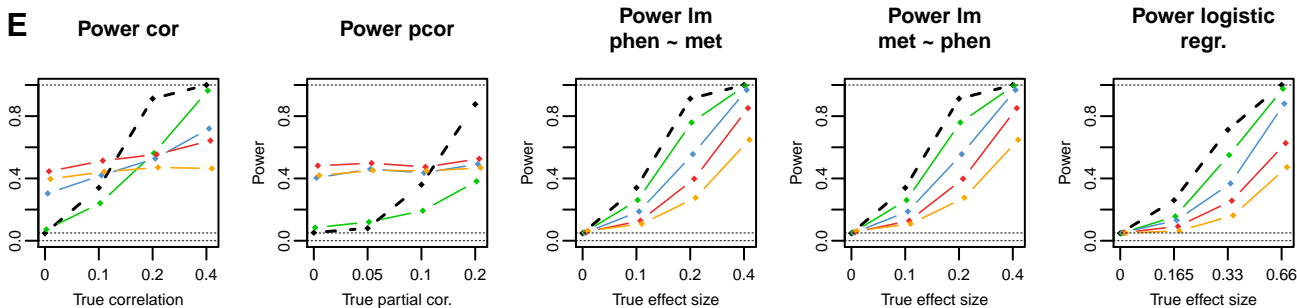

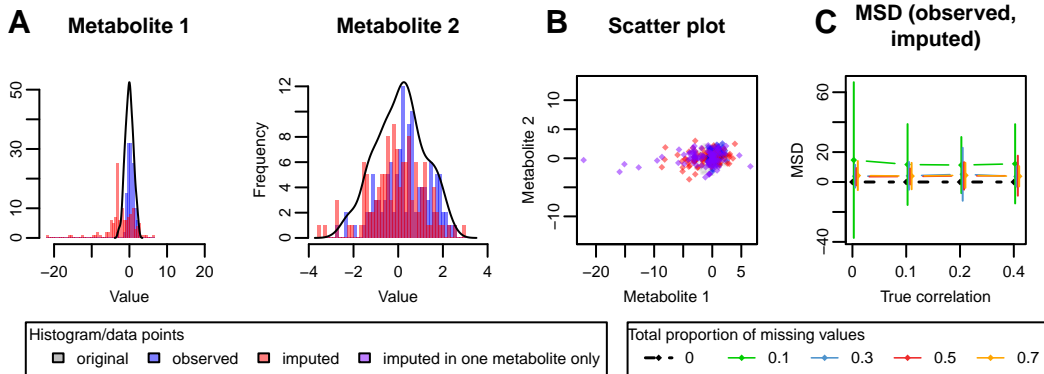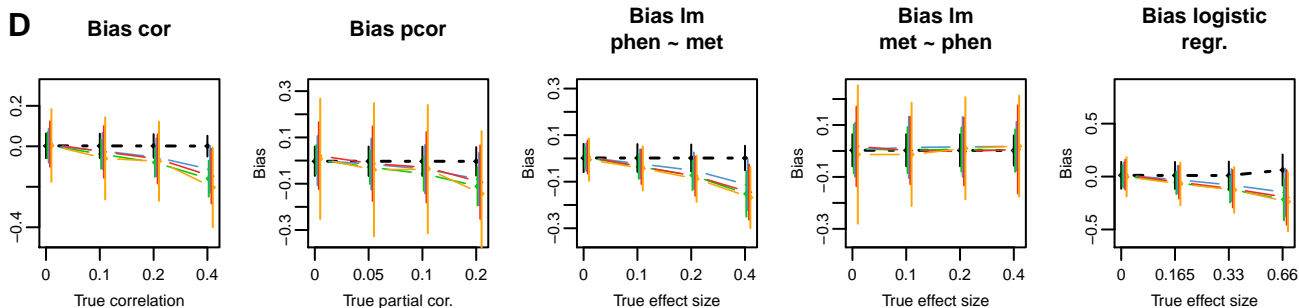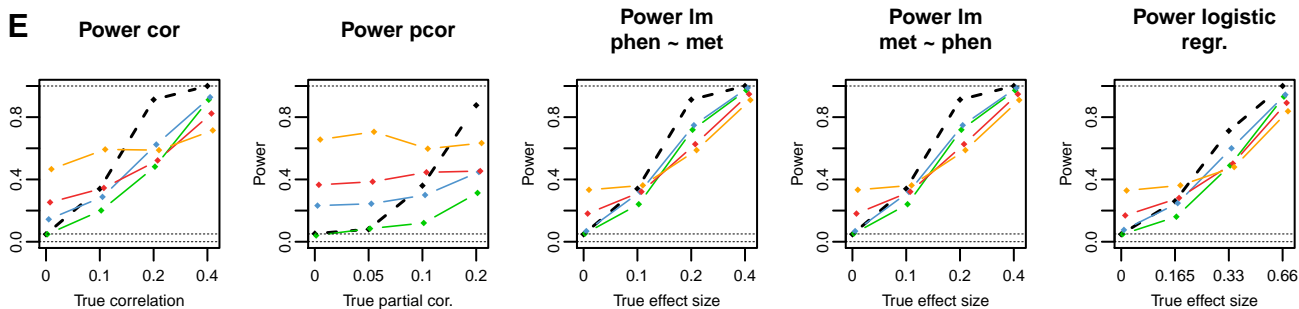

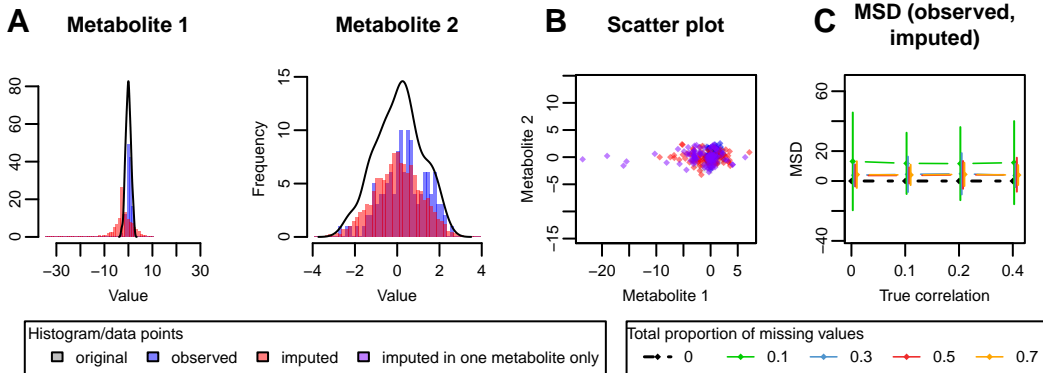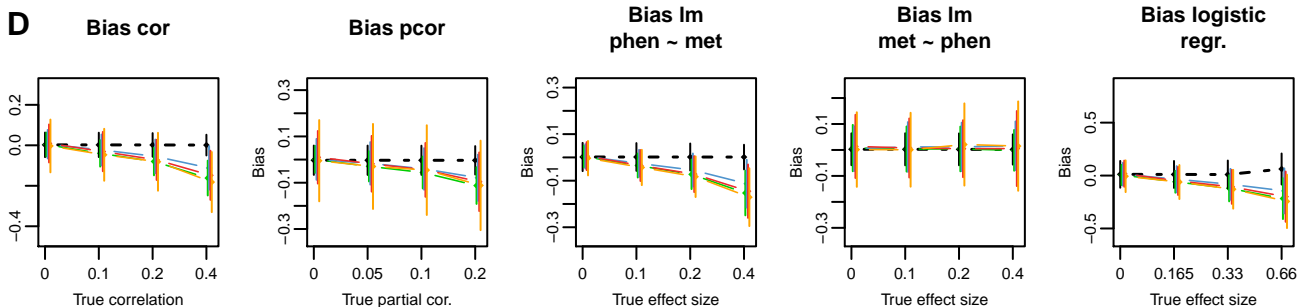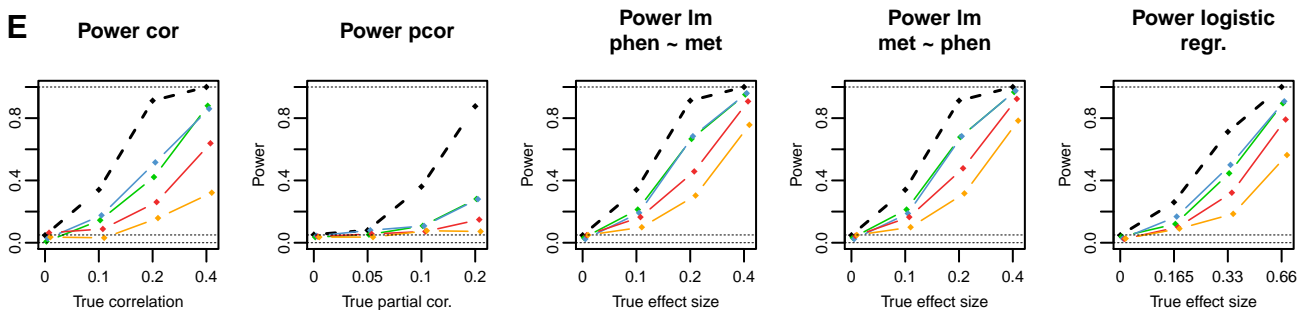

**A** Metabolite 1

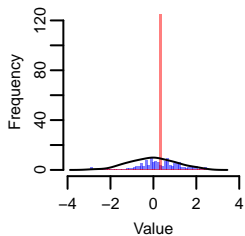

Metabolite 2

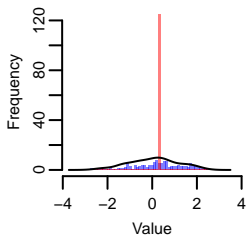

**B** Scatter plot

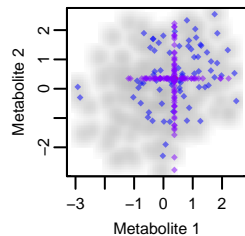

**C** MSD (observed, imputed)

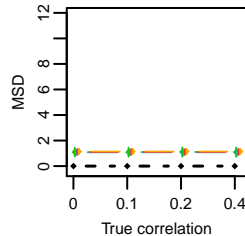

Histogram/data points  
 ■ original ■ observed ■ imputed ■ imputed in one metabolite only

Total proportion of missing values  
 - - 0 - - 0.1 - - 0.3 - - 0.5 - - 0.7

**D** Bias cor

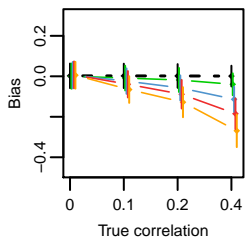

Bias pcor

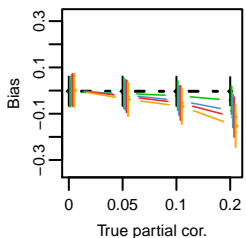

Bias lm phen ~ met

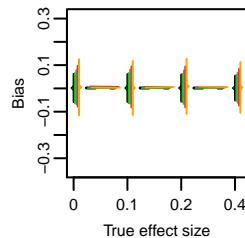

Bias lm met ~ phen

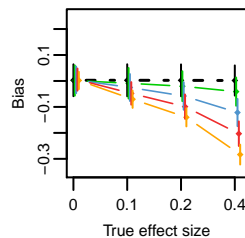

Bias logistic regr.

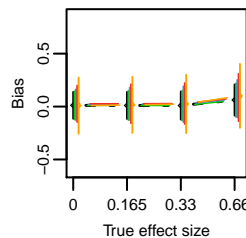

**E** Power cor

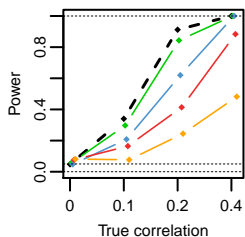

Power pcor

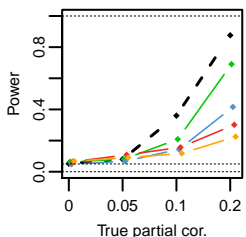

Power lm phen ~ met

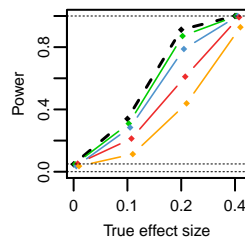

Power lm met ~ phen

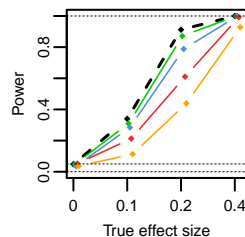

Power logistic regr.

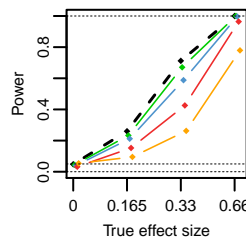

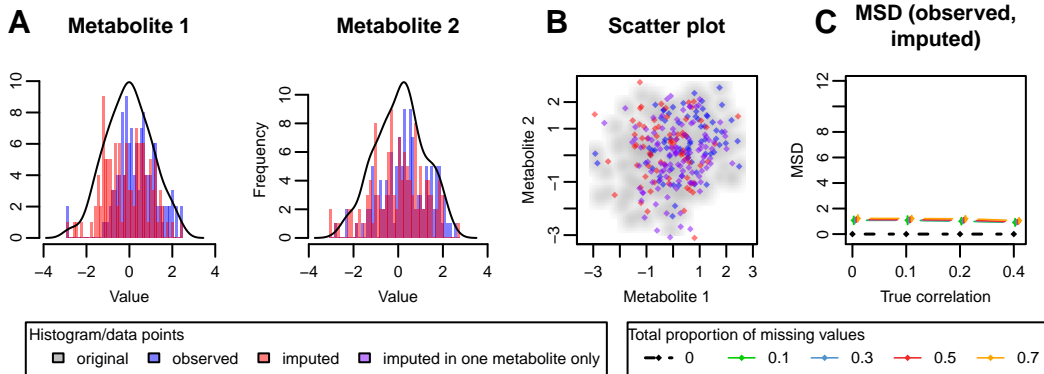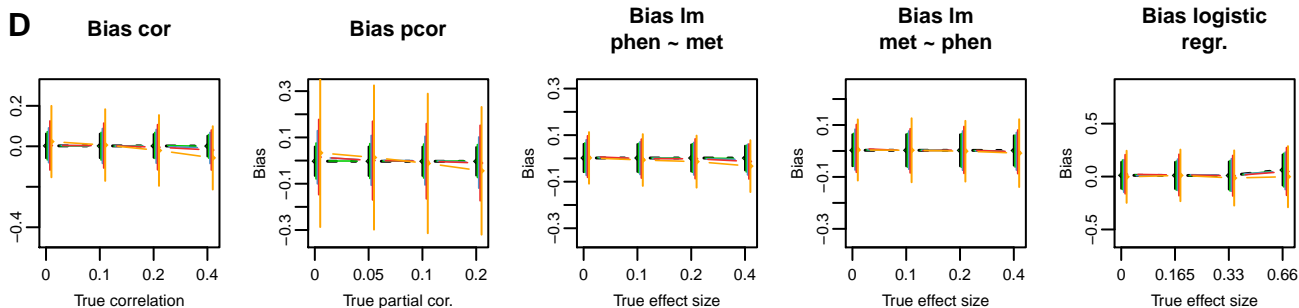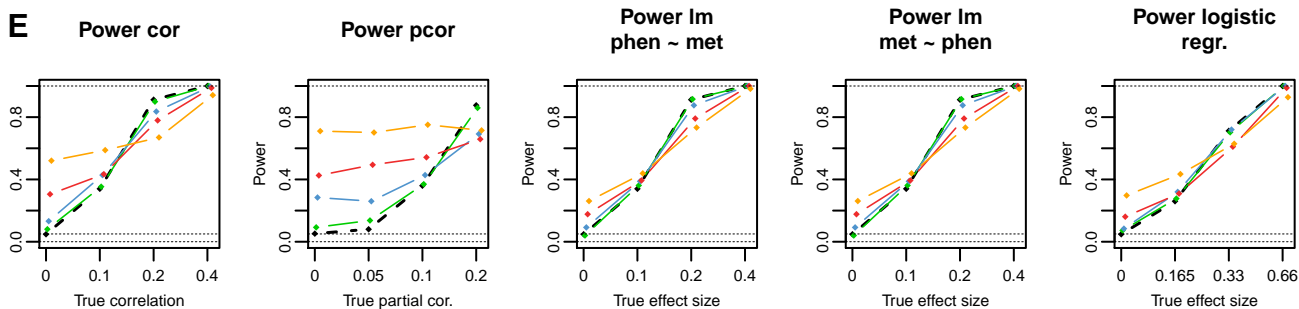

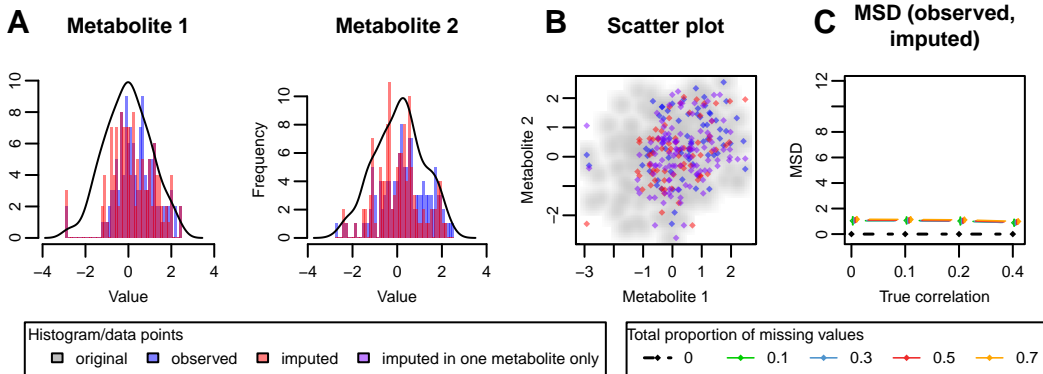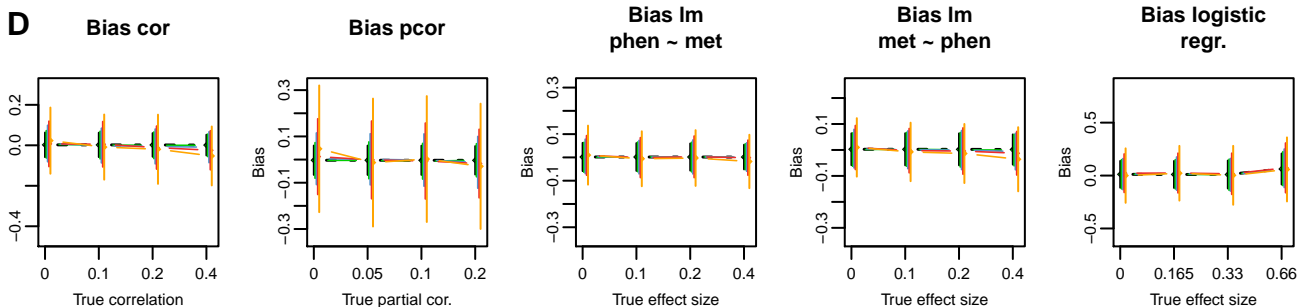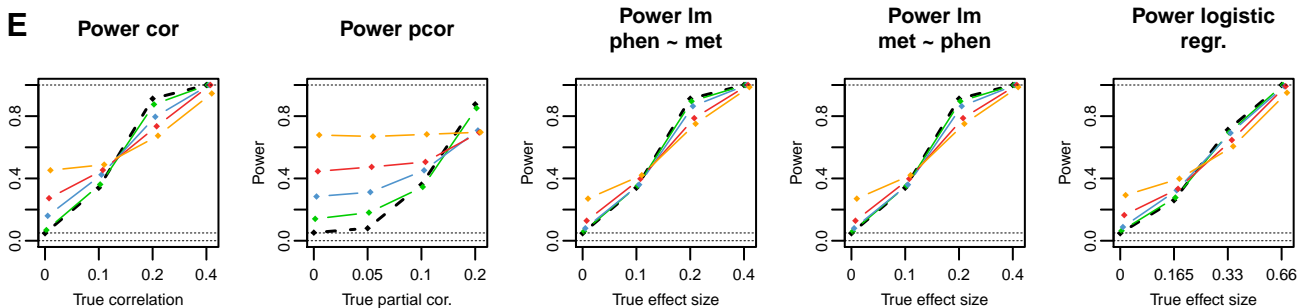



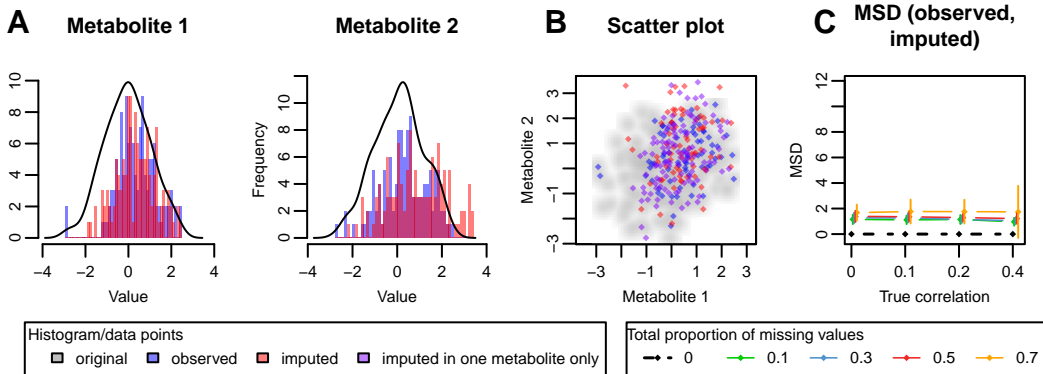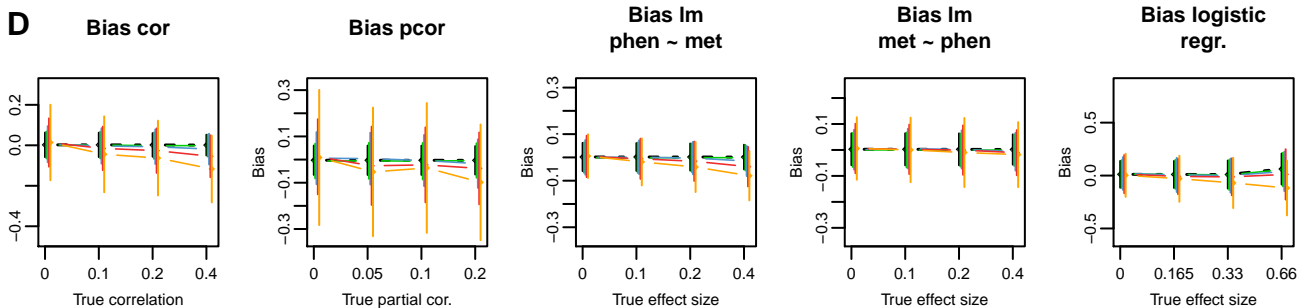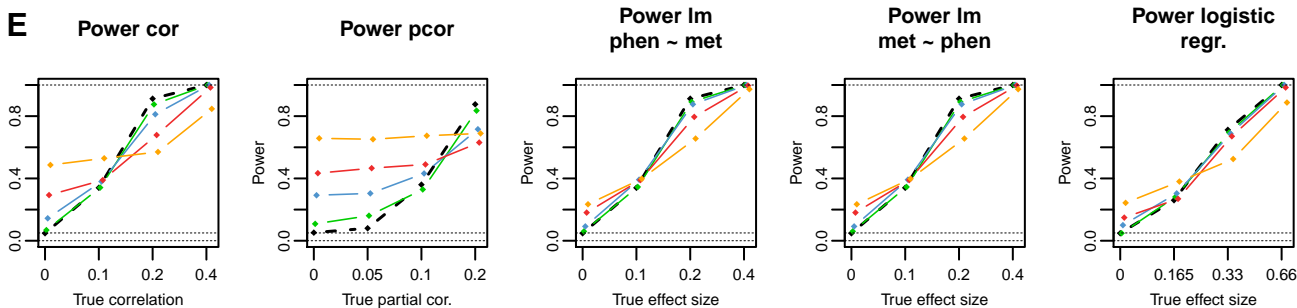

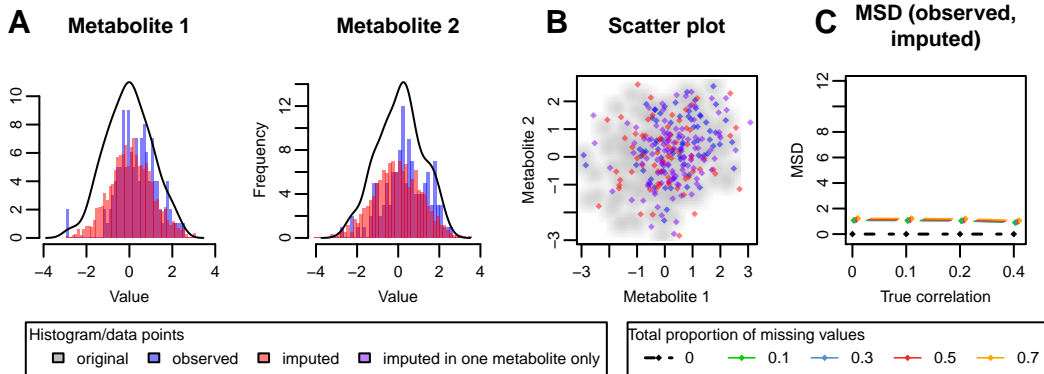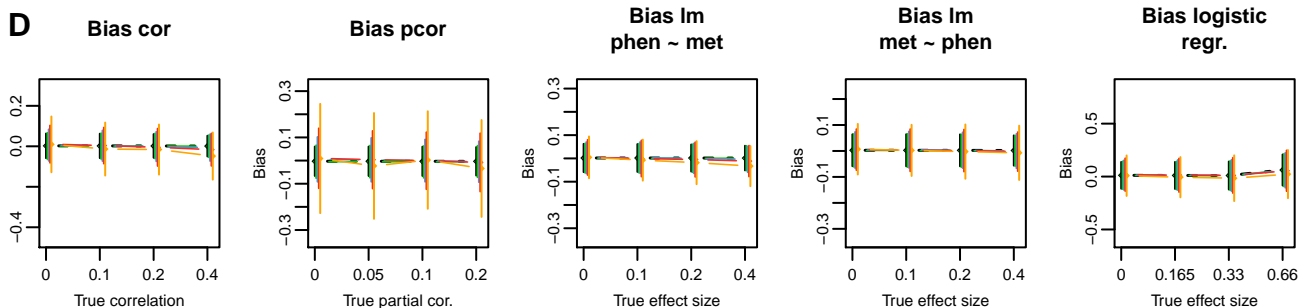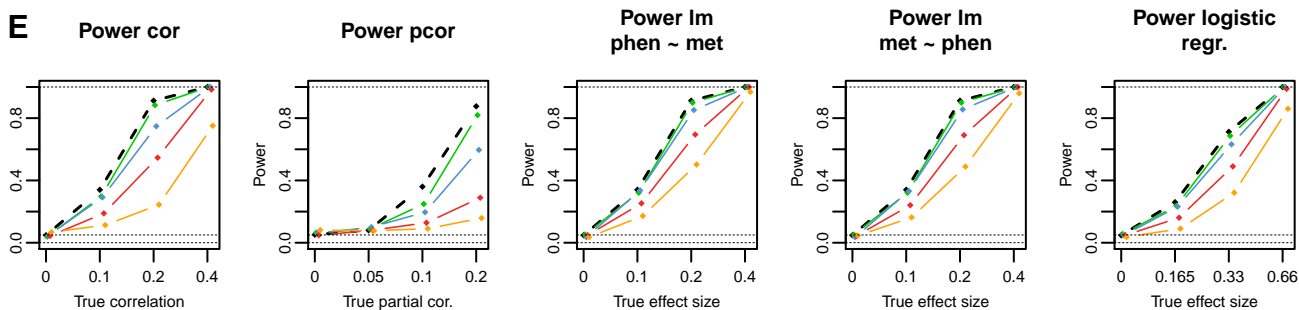

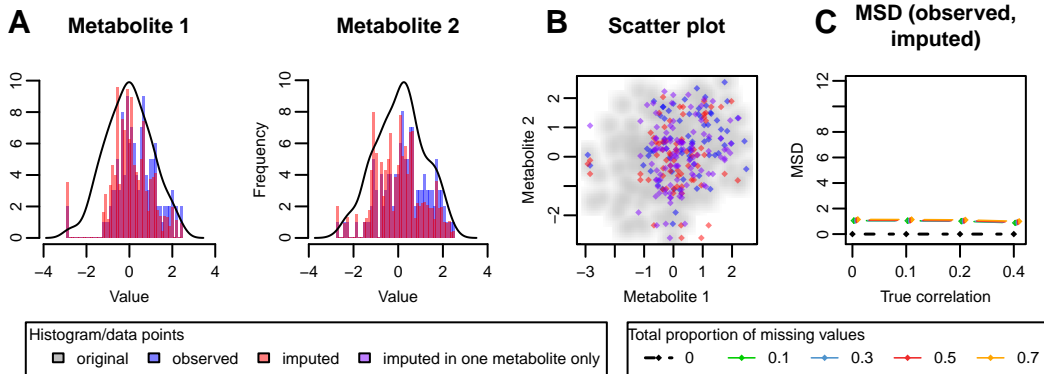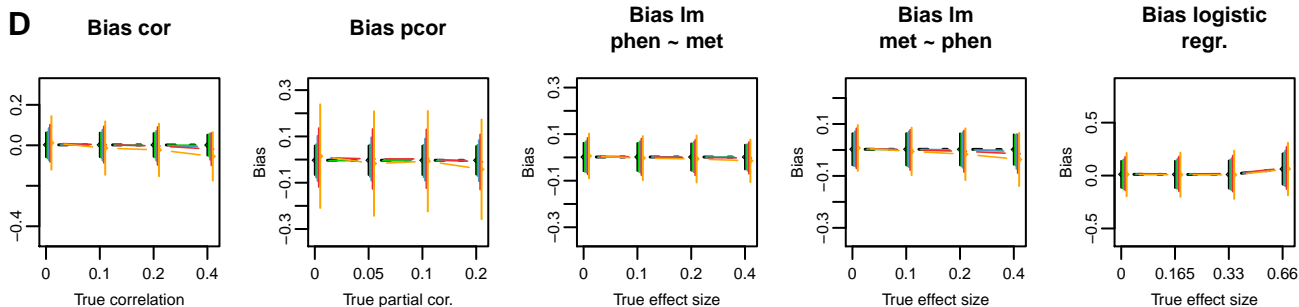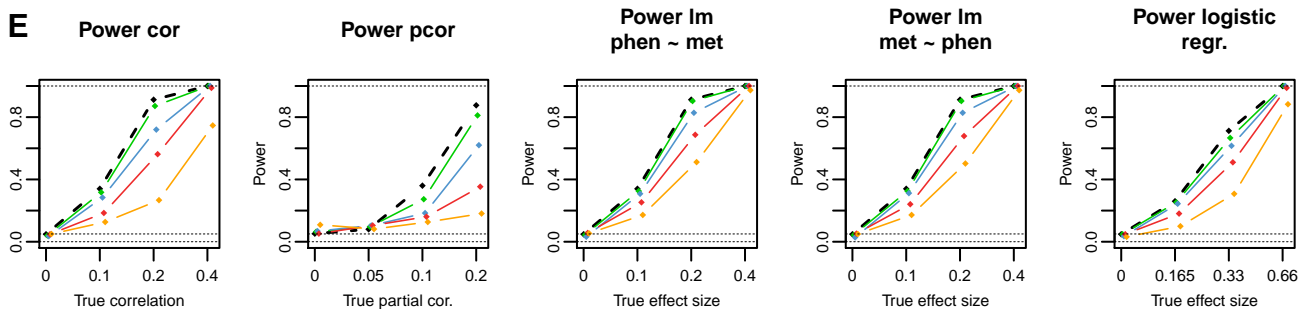

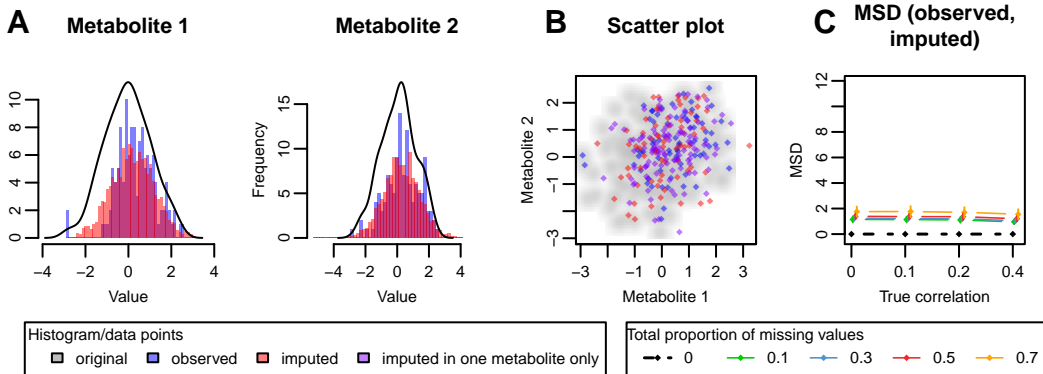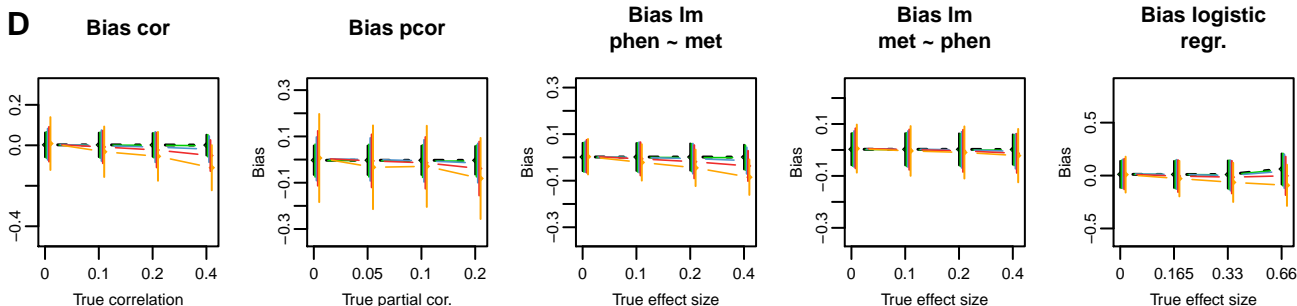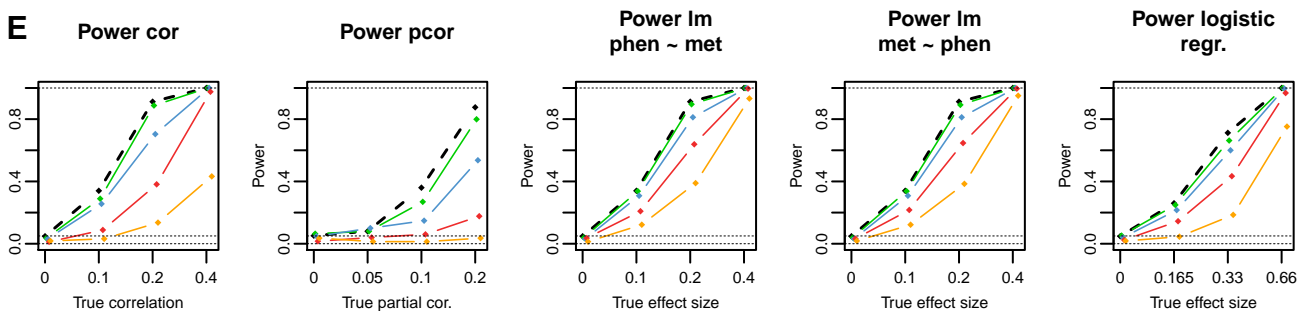

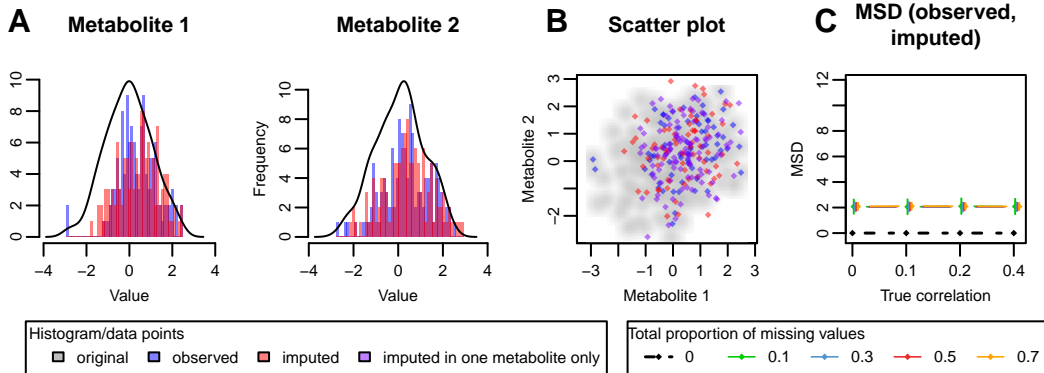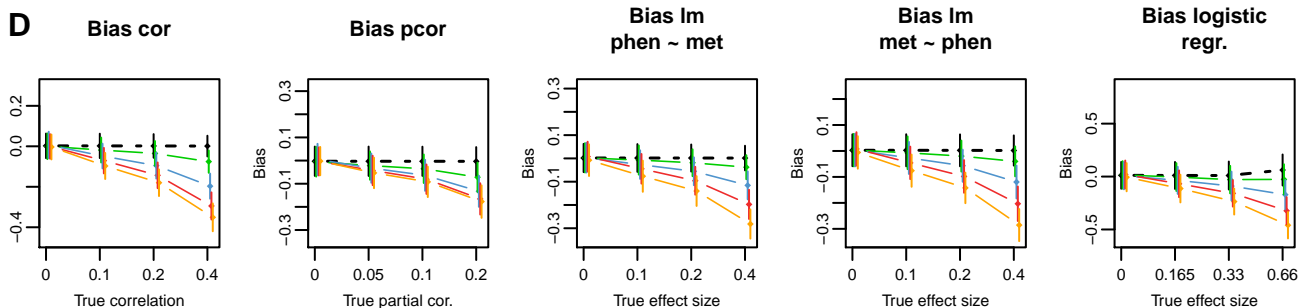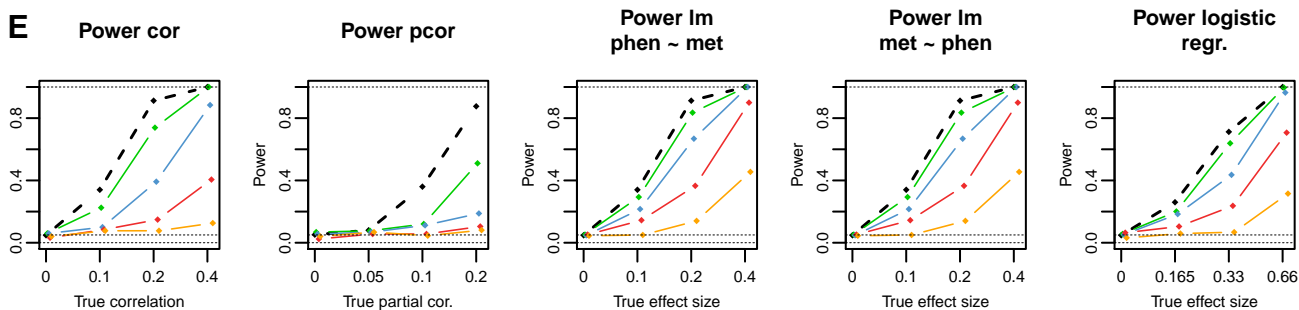

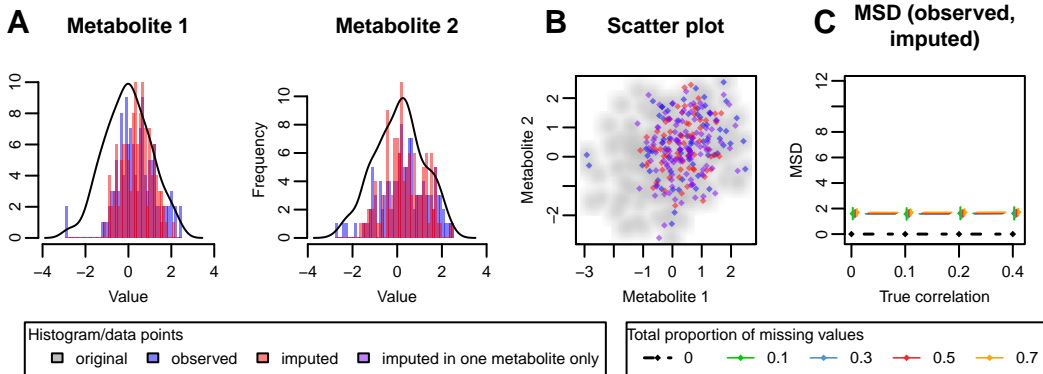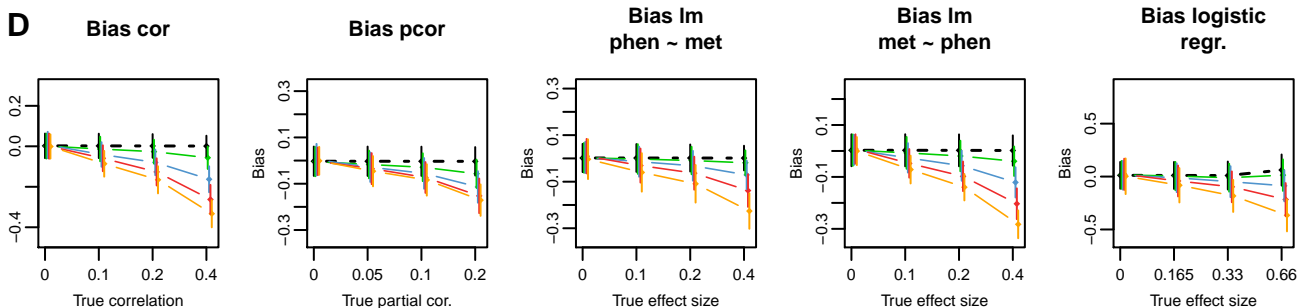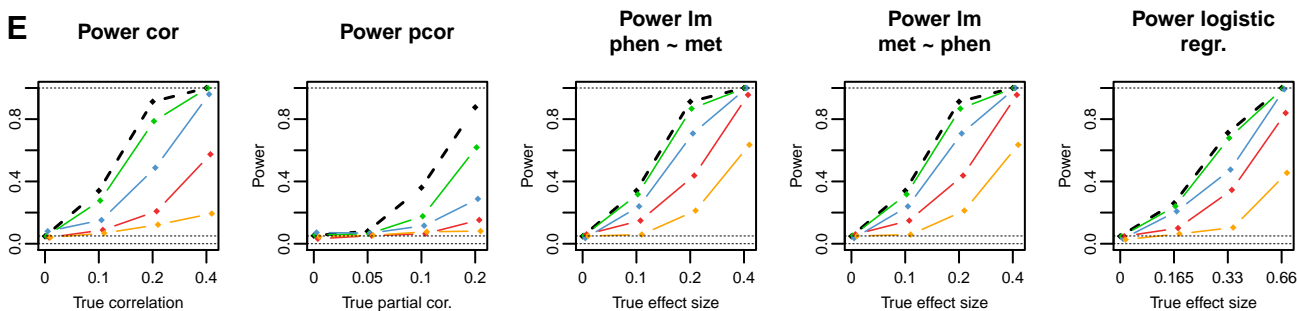

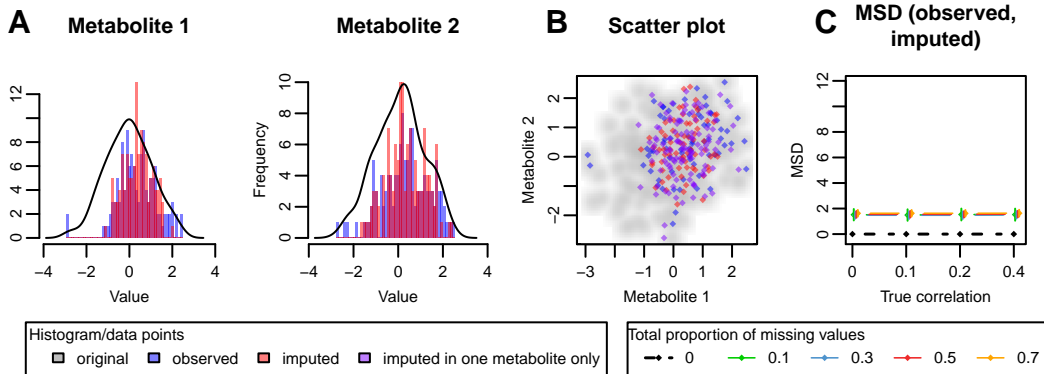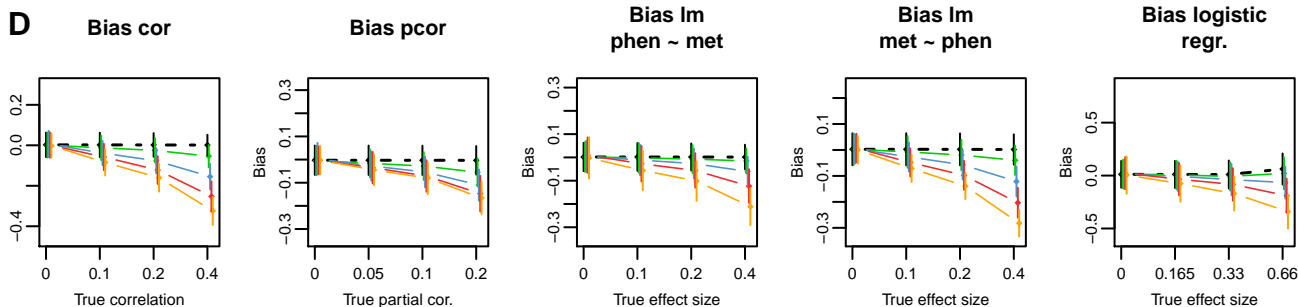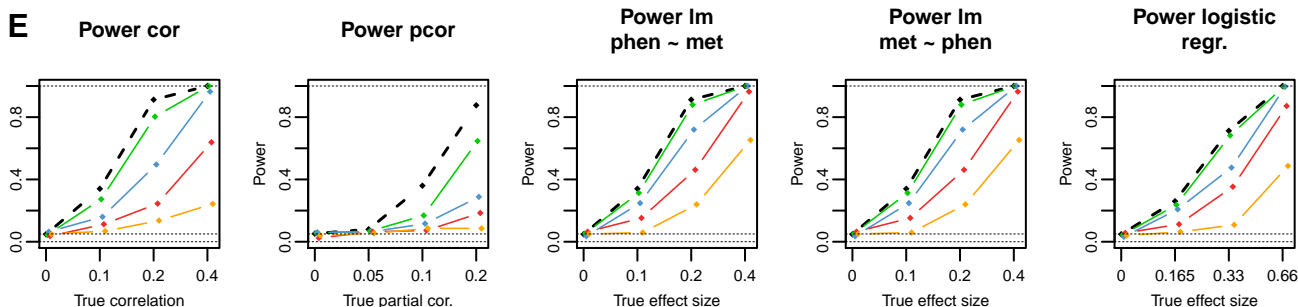

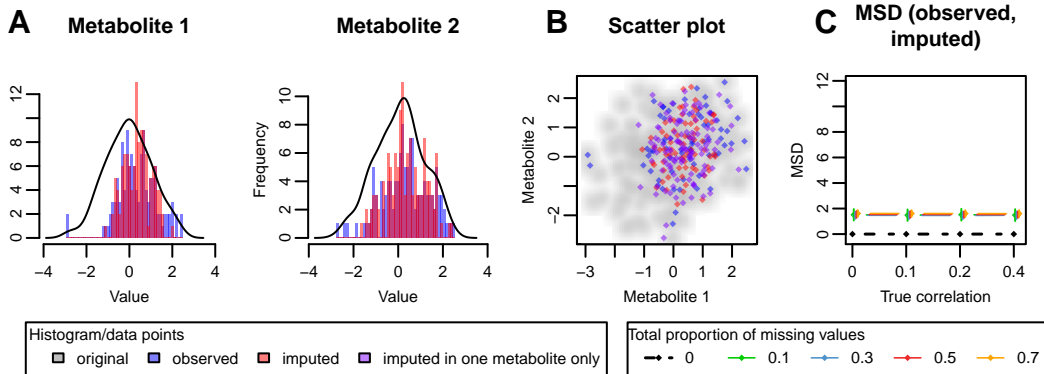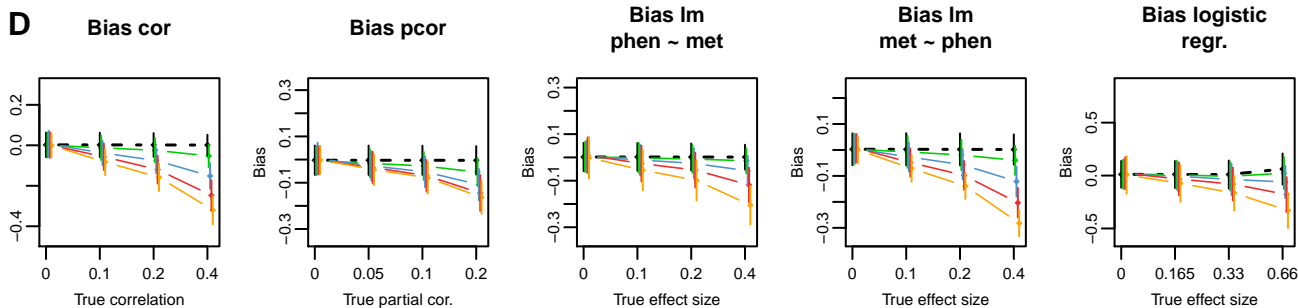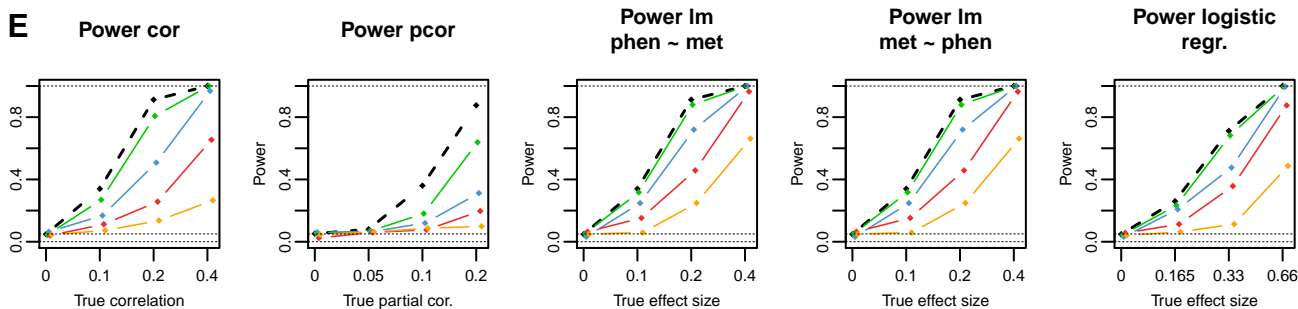



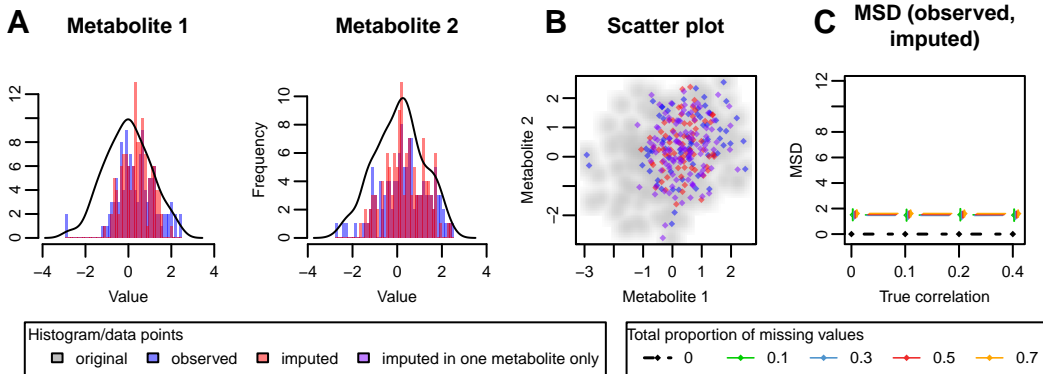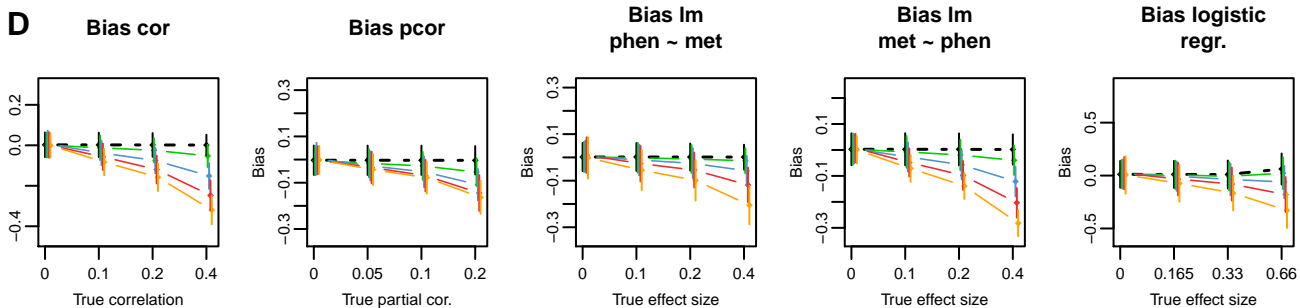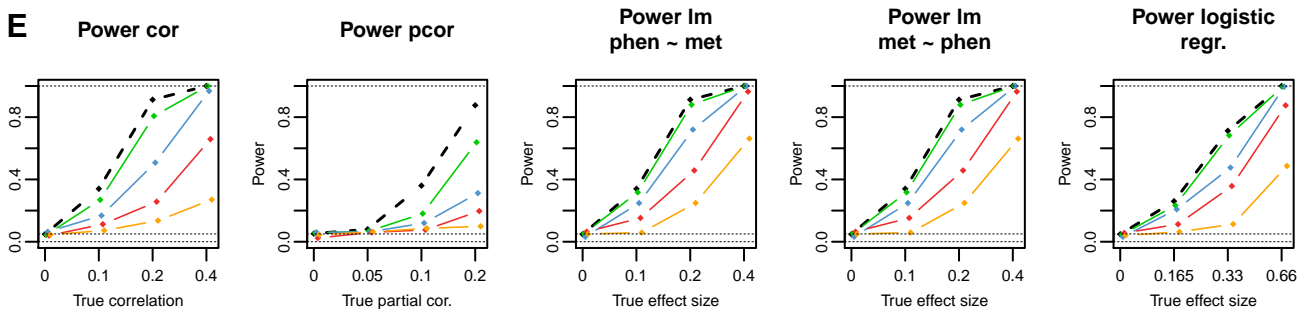

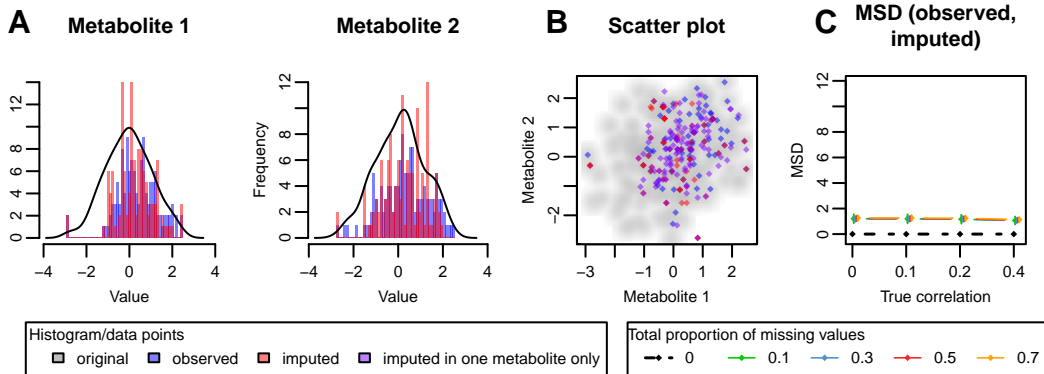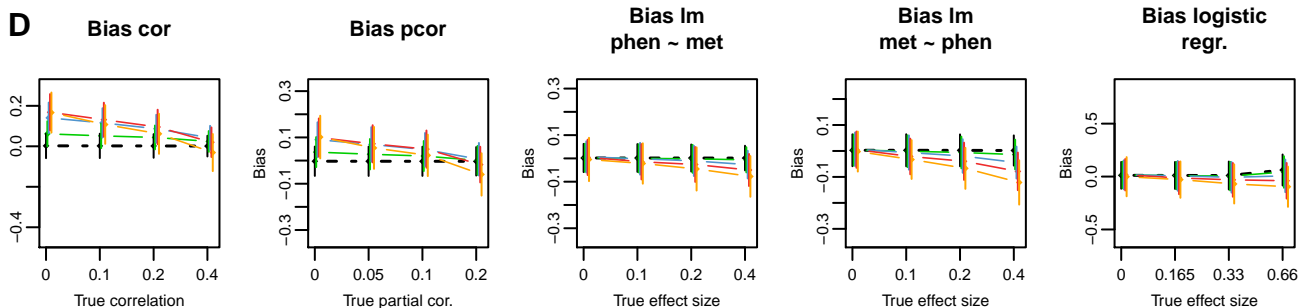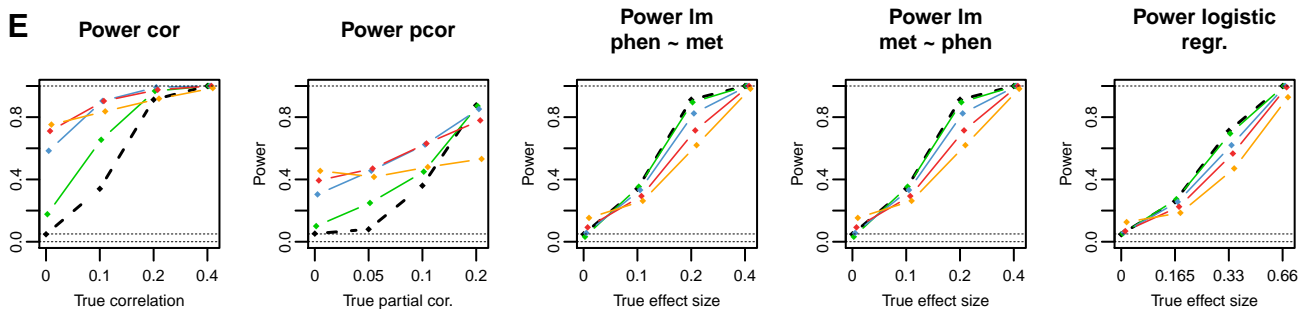

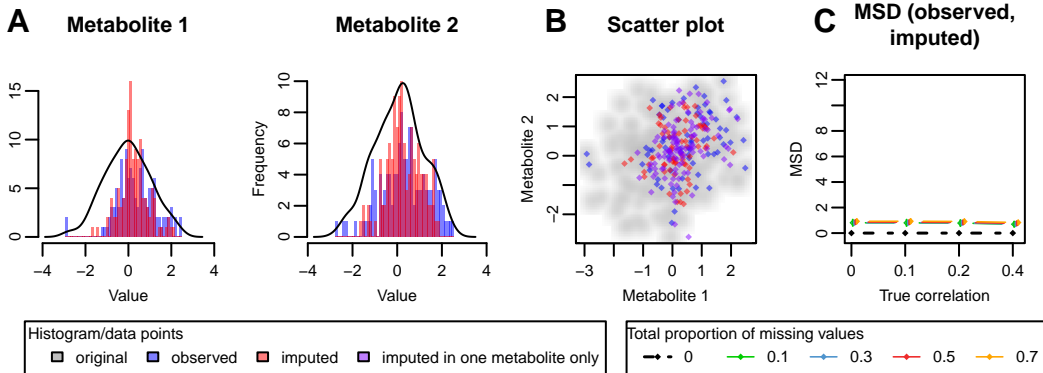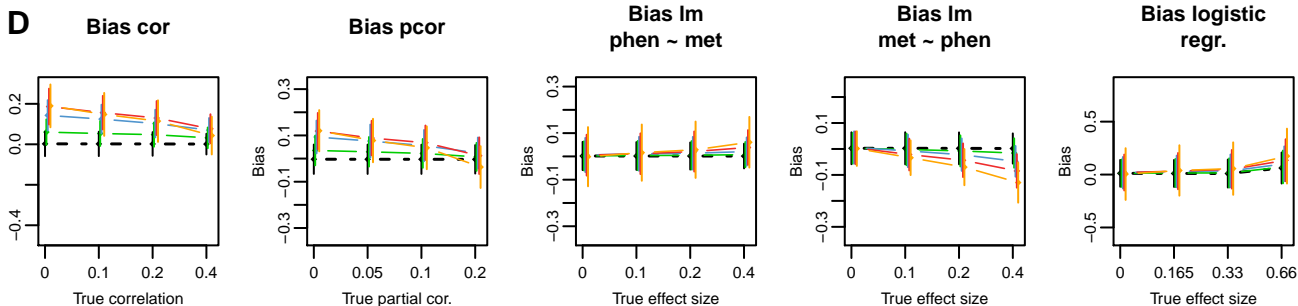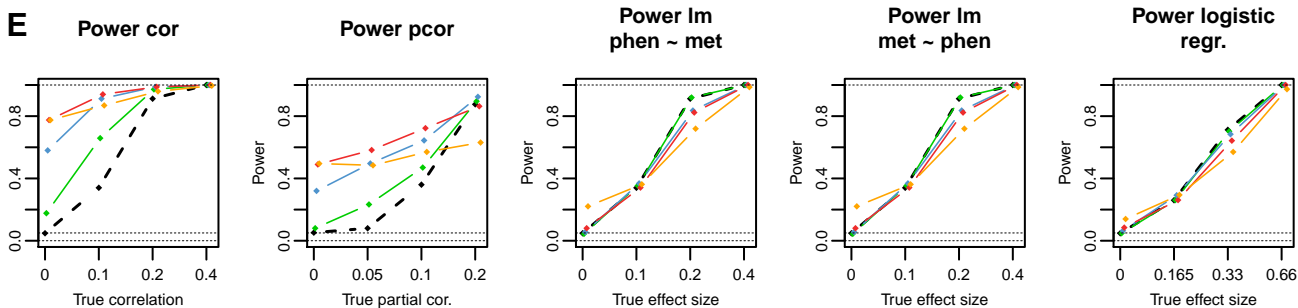

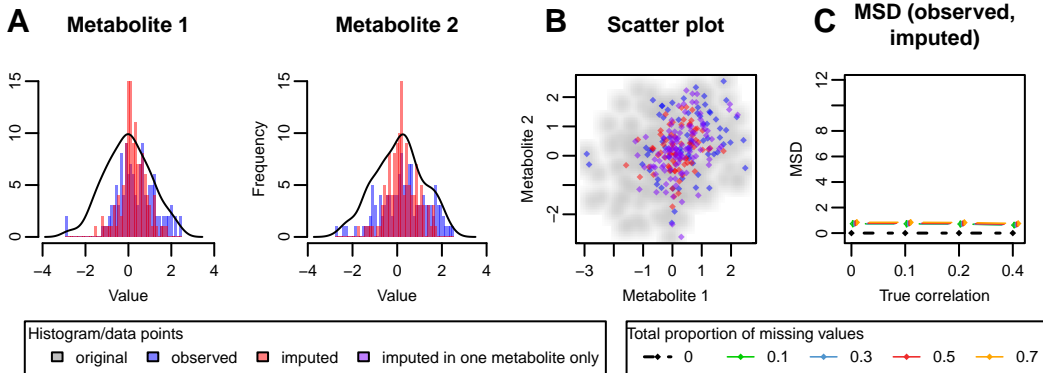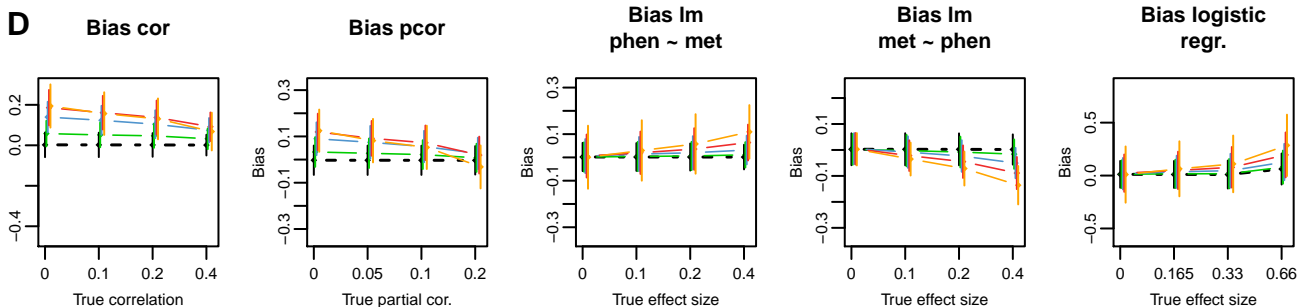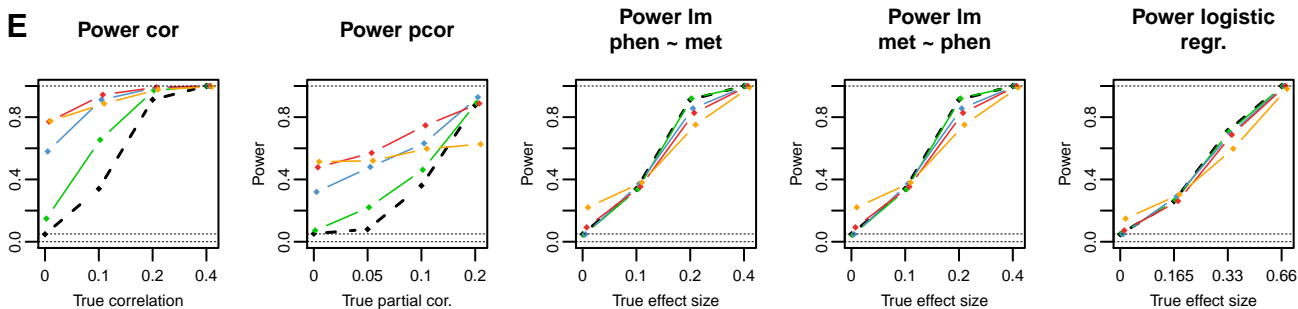

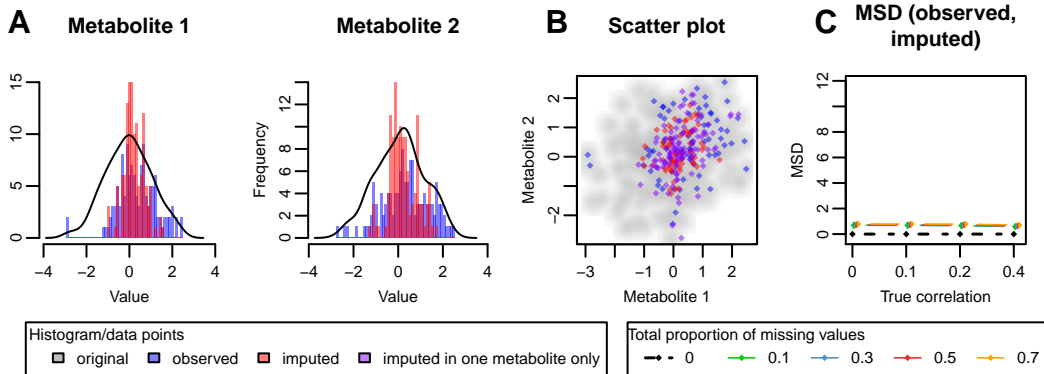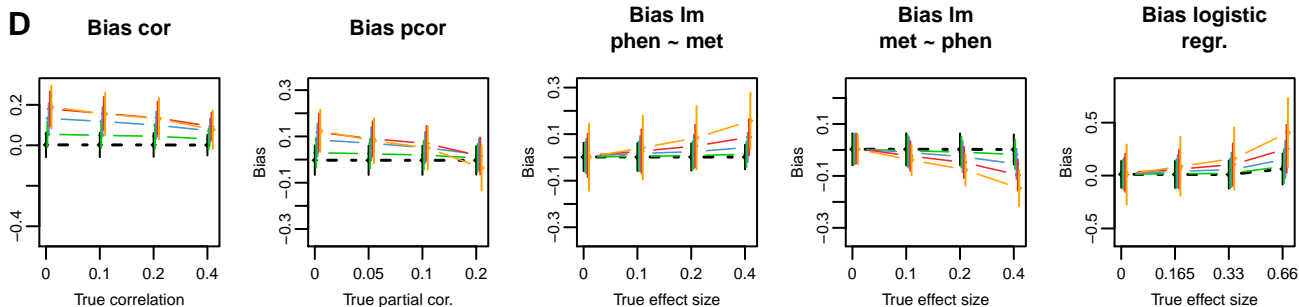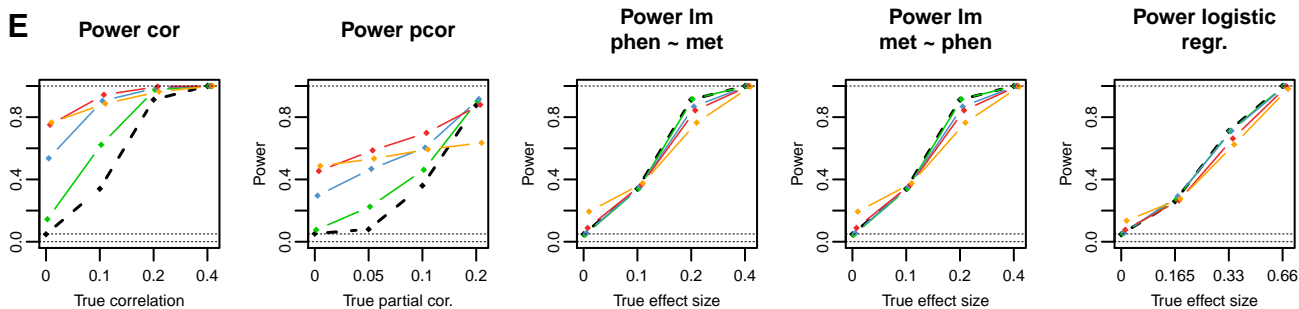

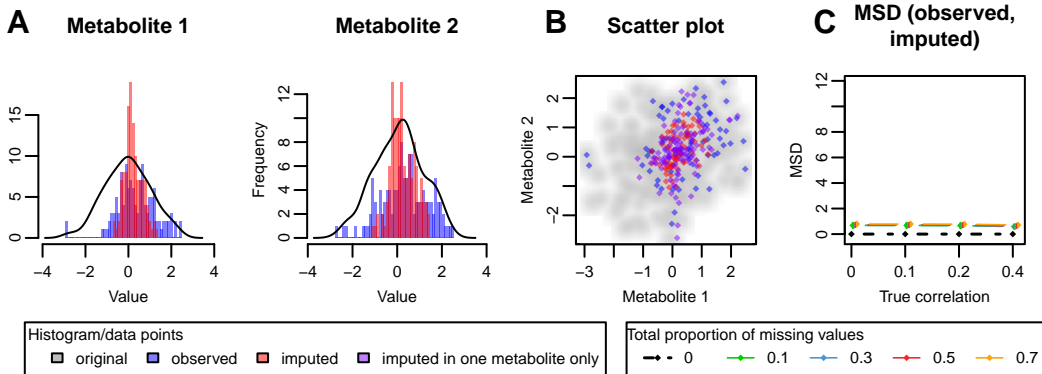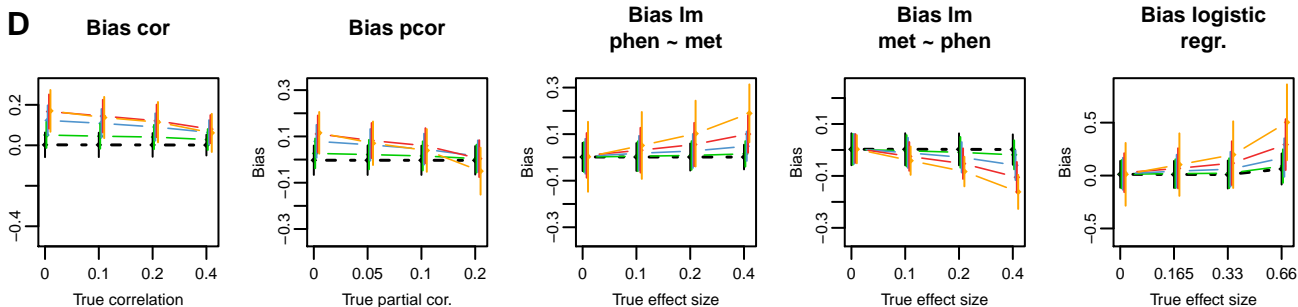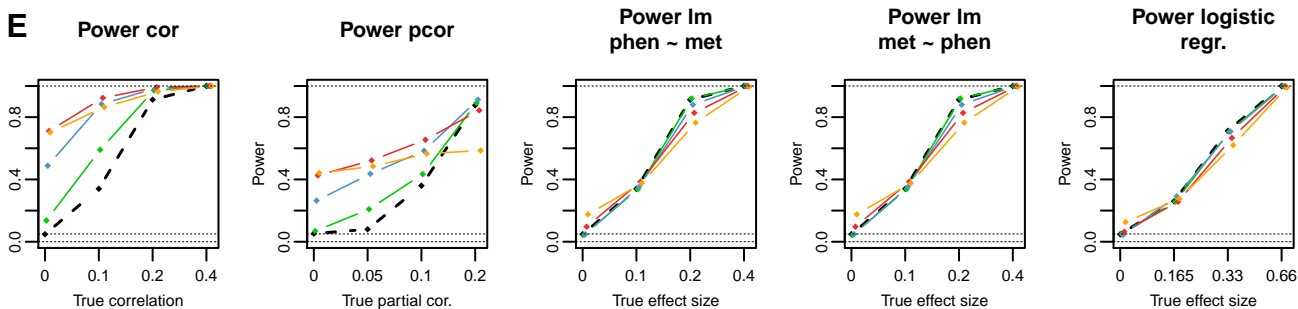

**A** Metabolite 1

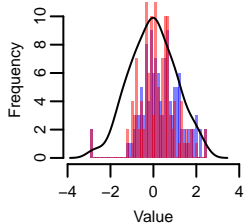

Metabolite 2

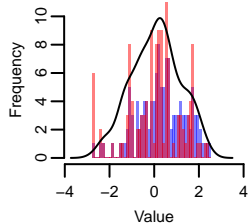

**B** Scatter plot

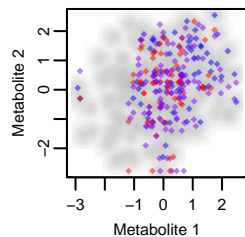

**C** MSD (observed, imputed)

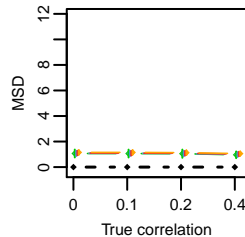

Histogram/data points  
 ■ original ■ observed ■ imputed ■ imputed in one metabolite only

Total proportion of missing values  
 - - 0 — 0.1 — 0.3 — 0.5 — 0.7

**D** Bias cor

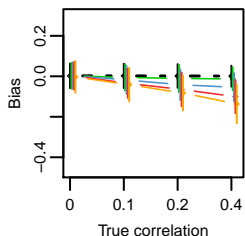

Bias pcor

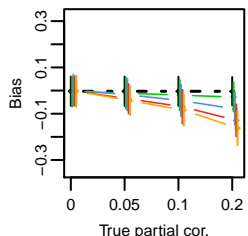

Bias lm phen ~ met

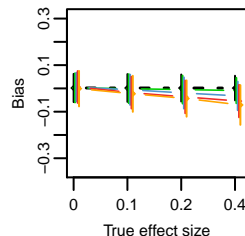

Bias lm met ~ phen

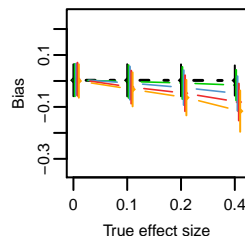

Bias logistic regr.

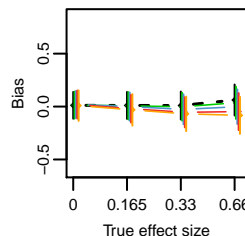

**E** Power cor

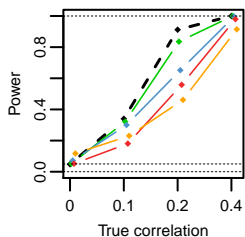

Power pcor

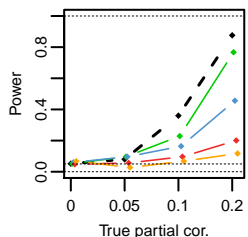

Power lm phen ~ met

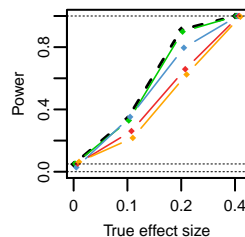

Power lm met ~ phen

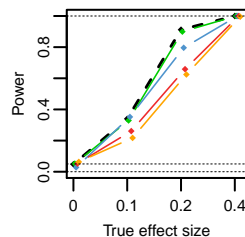

Power logistic regr.

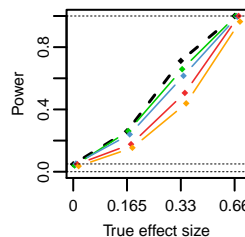

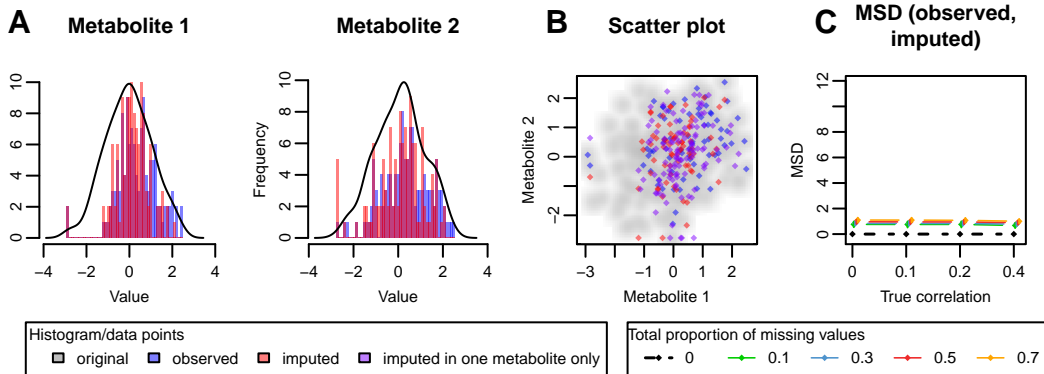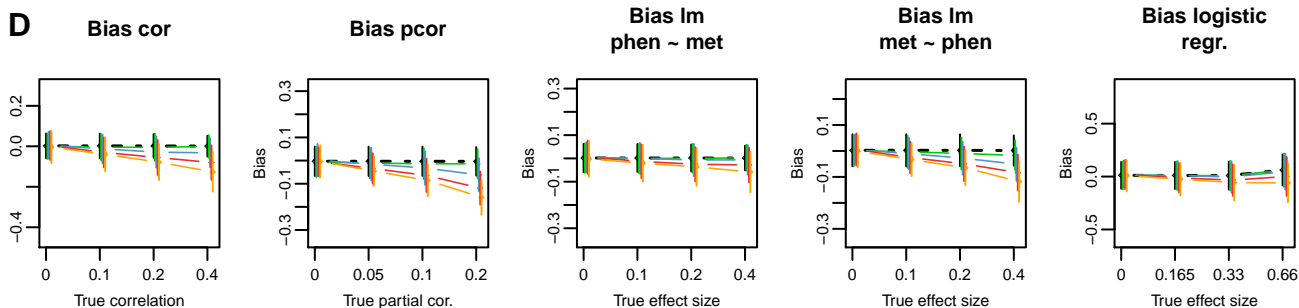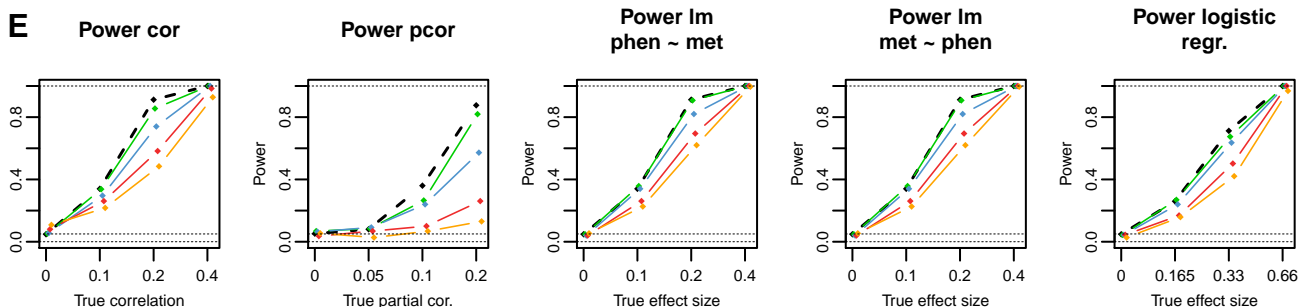



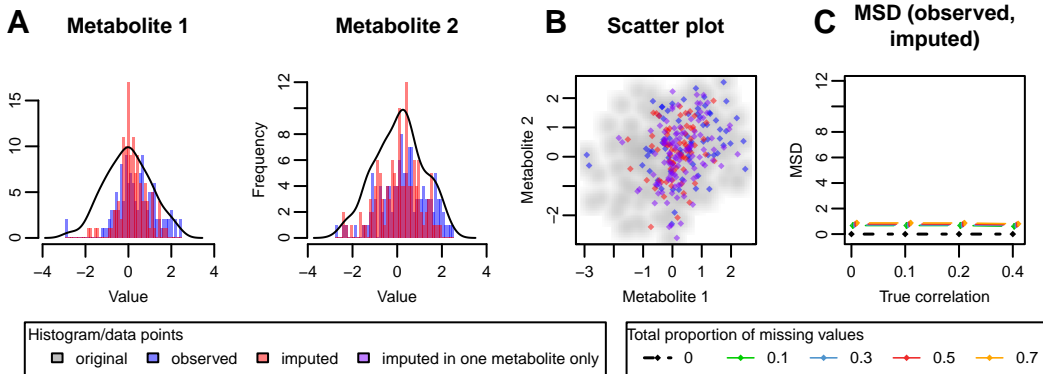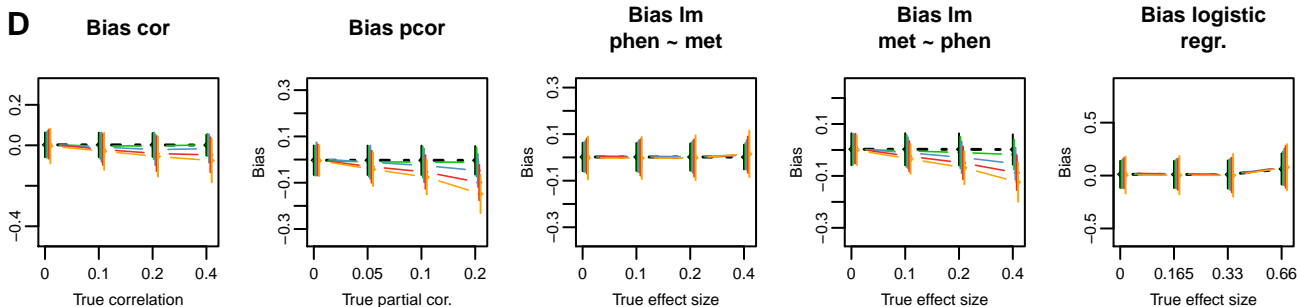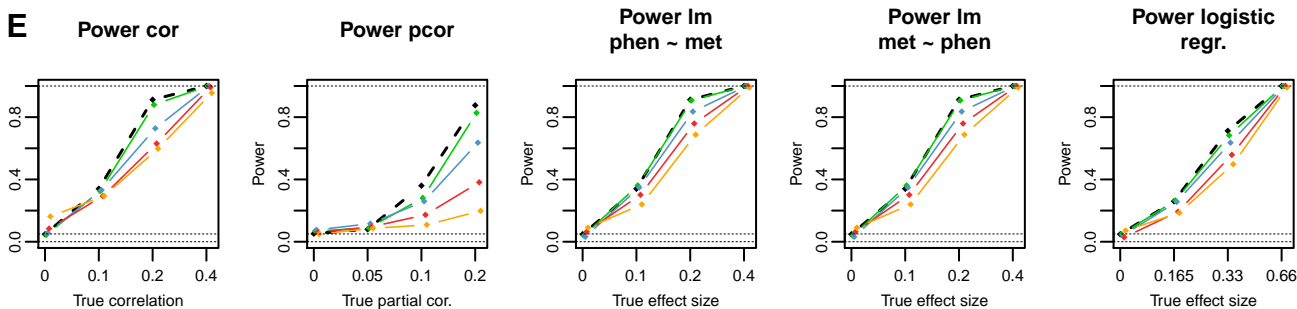

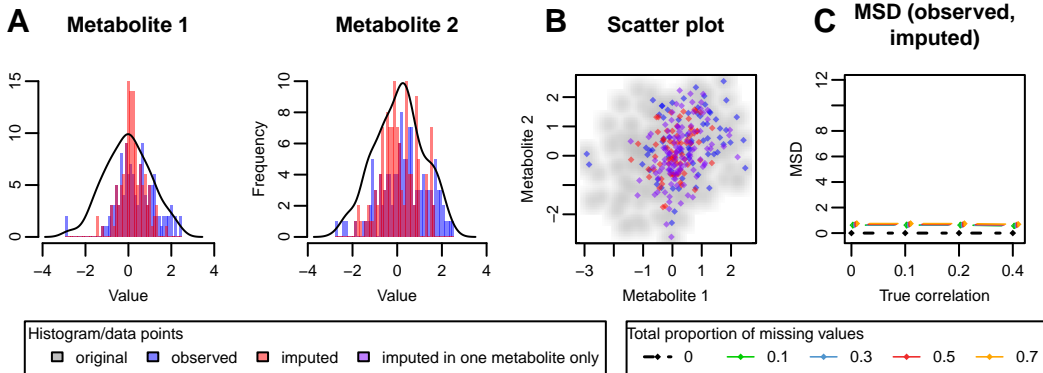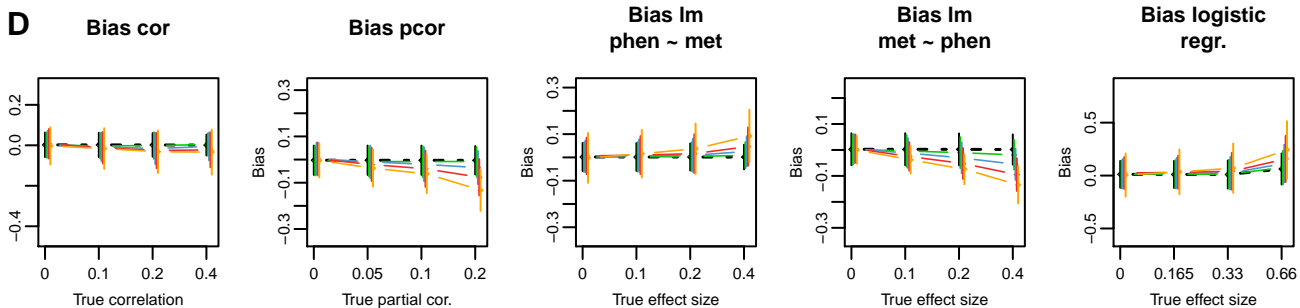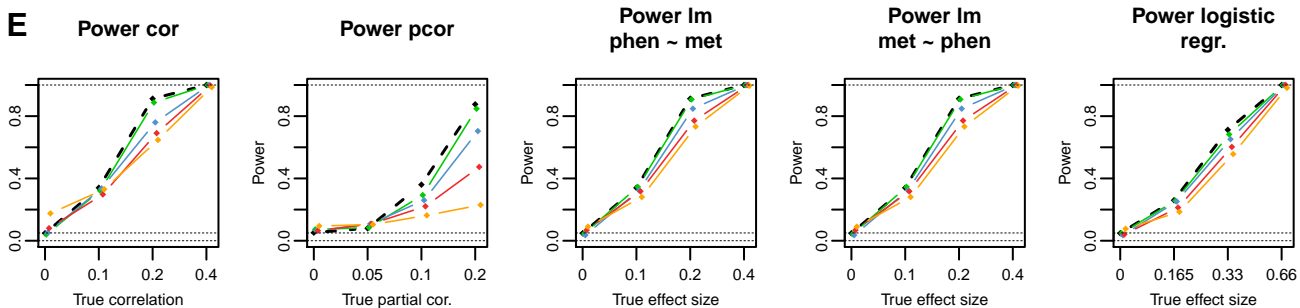

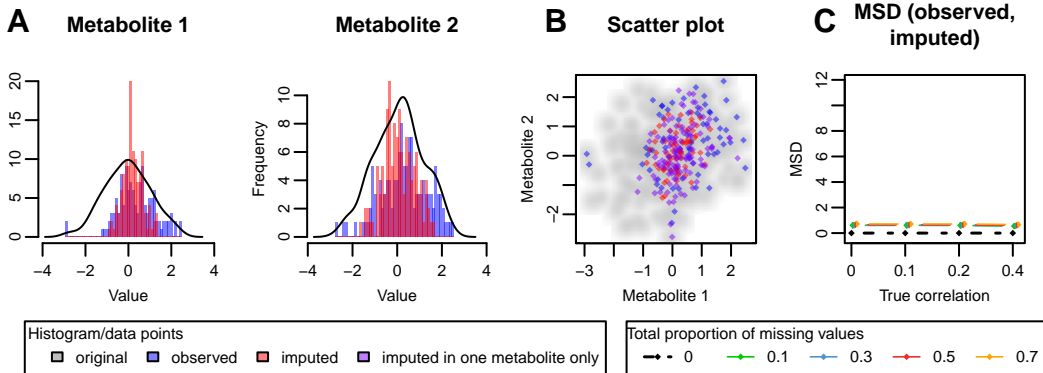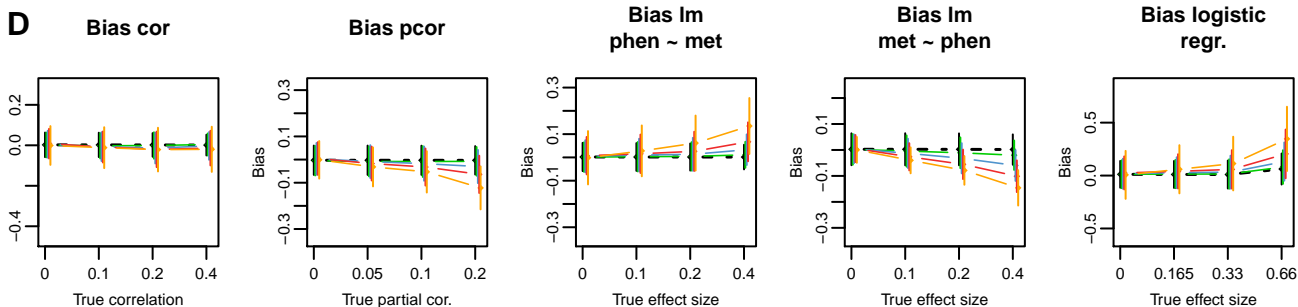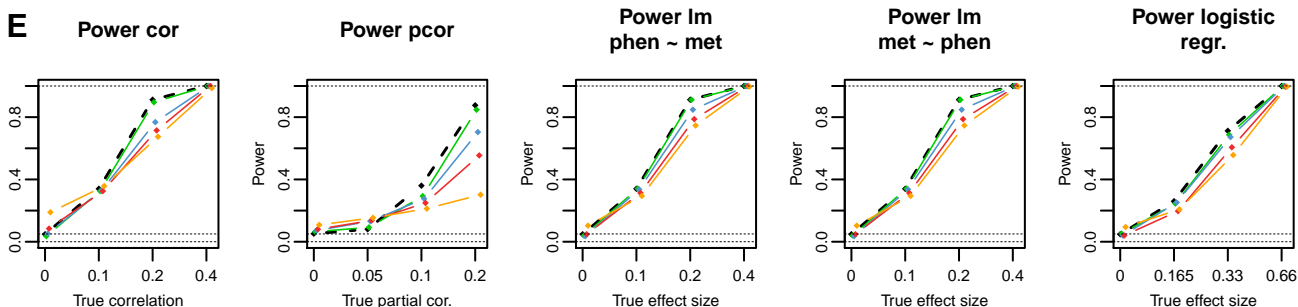

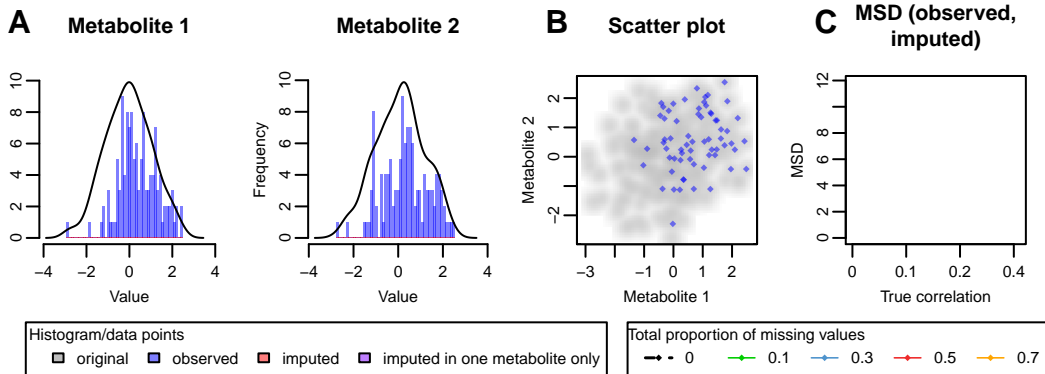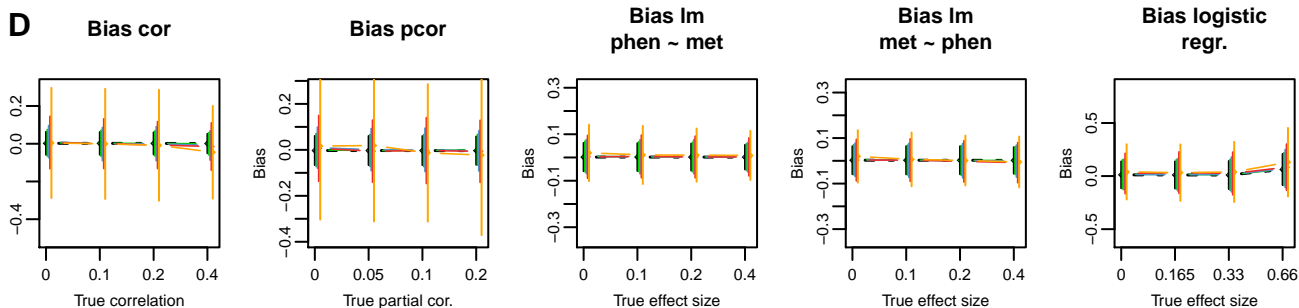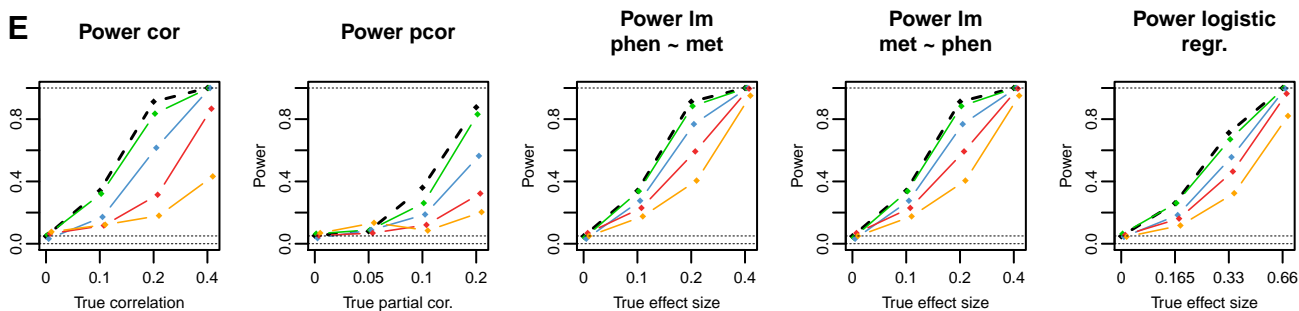

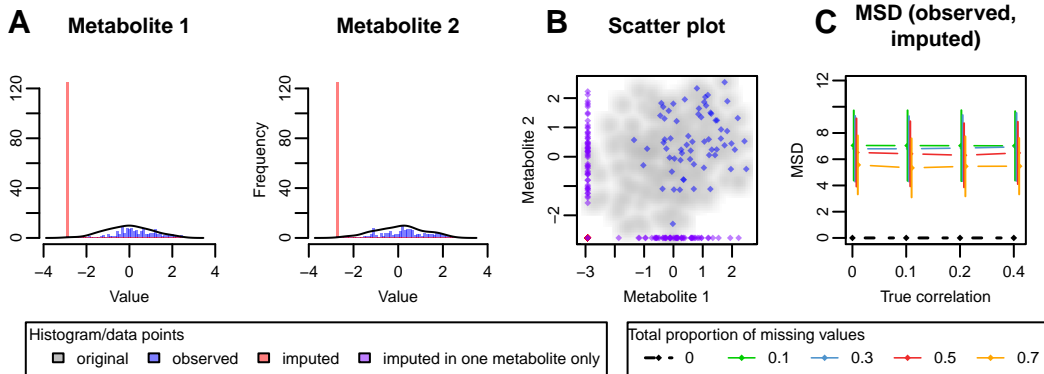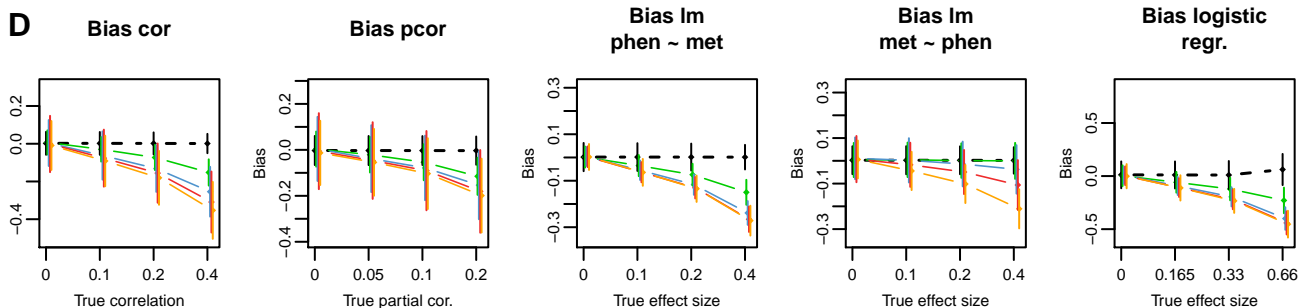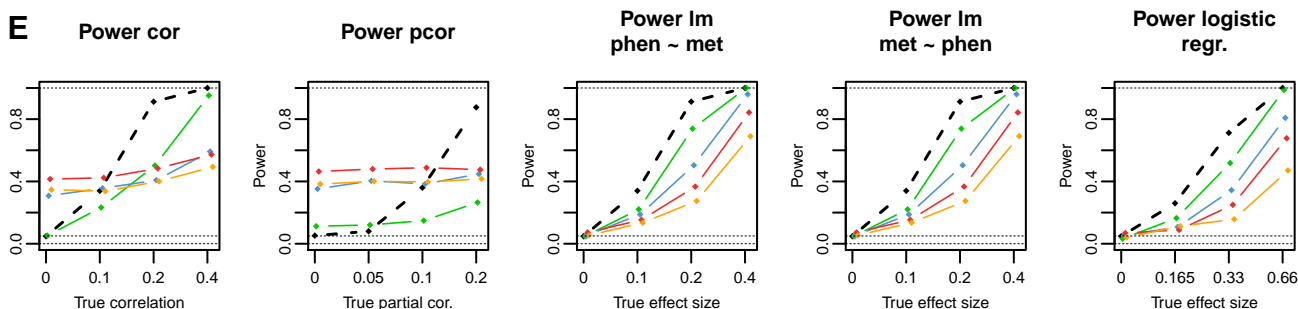

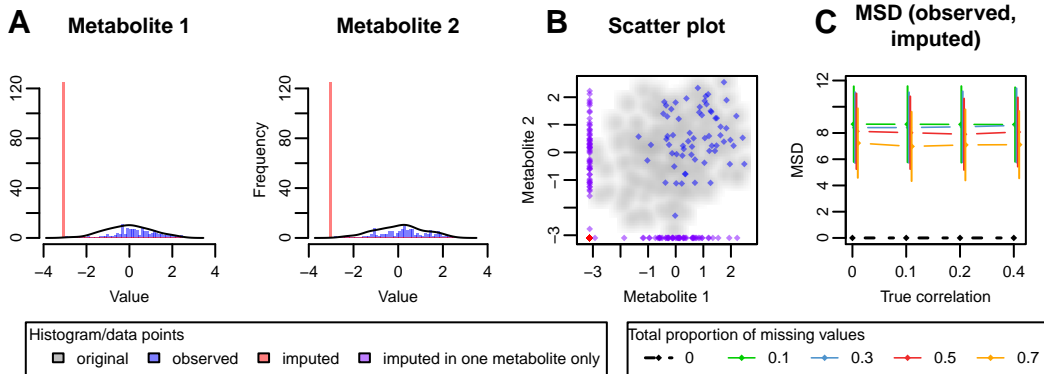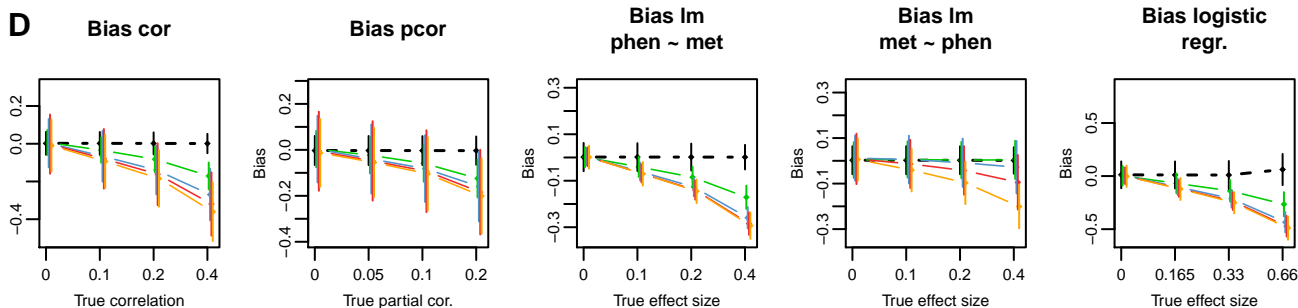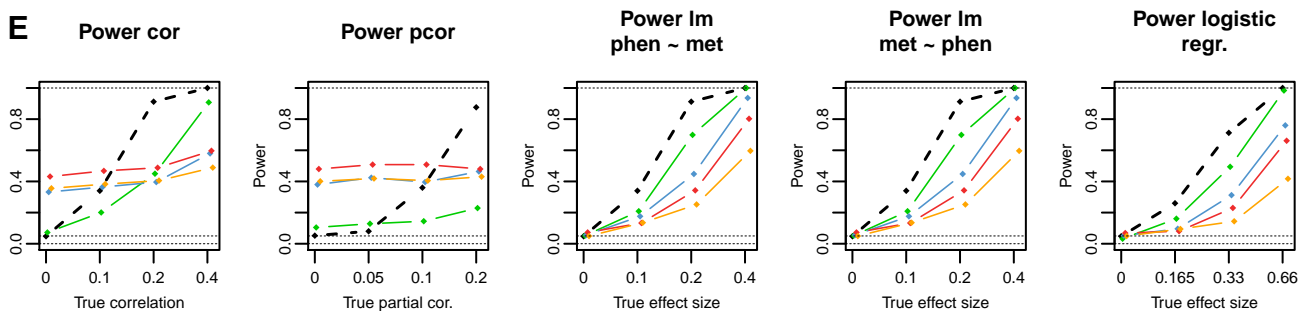

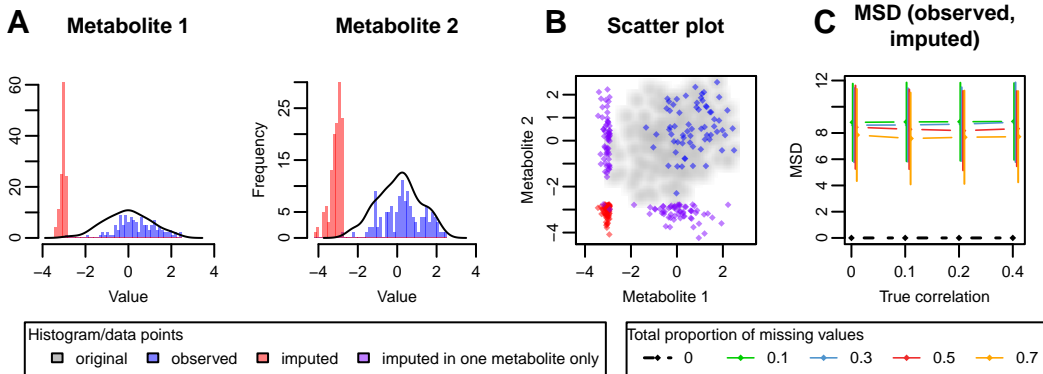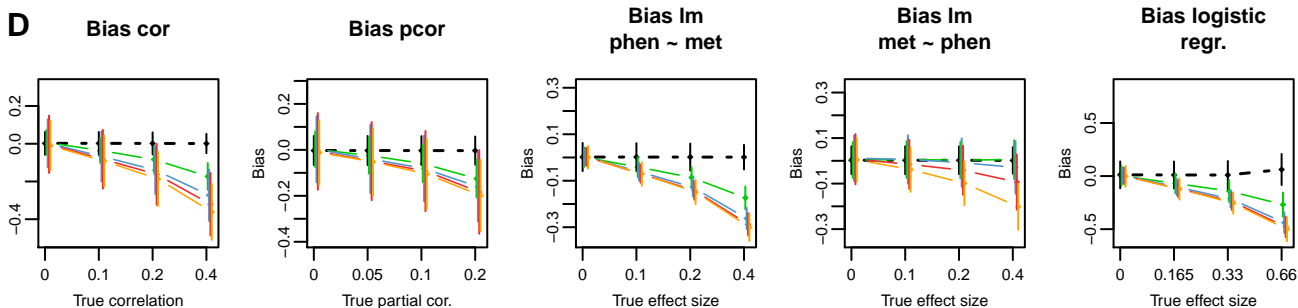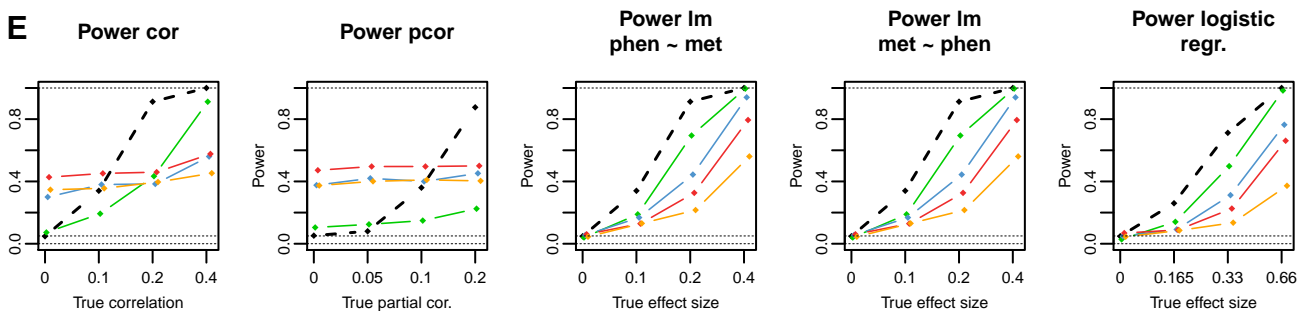

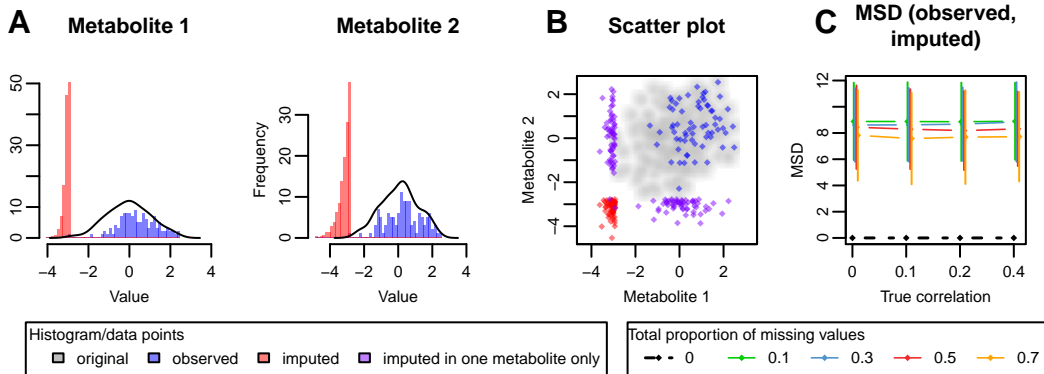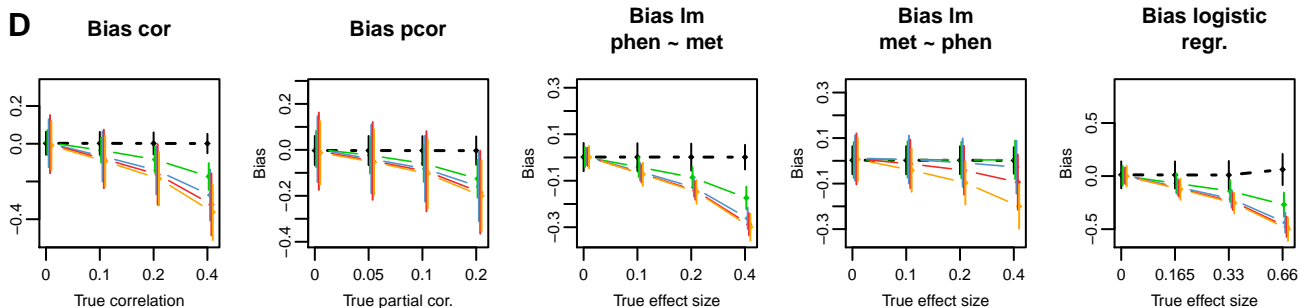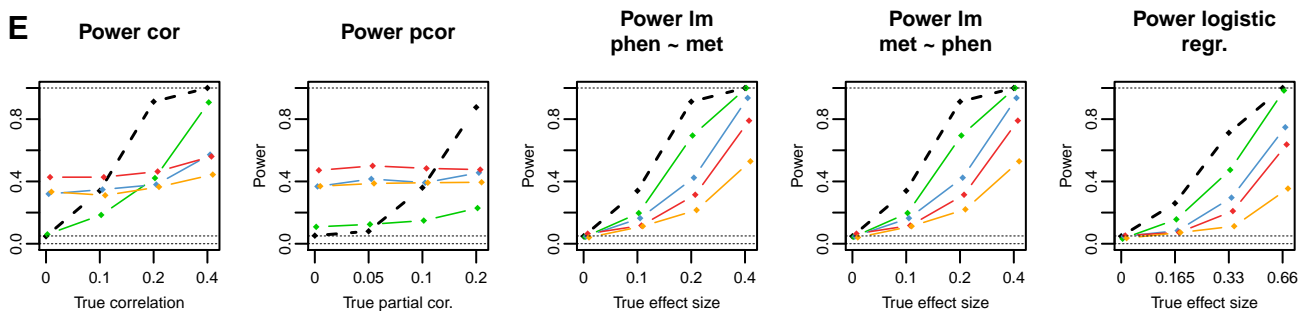



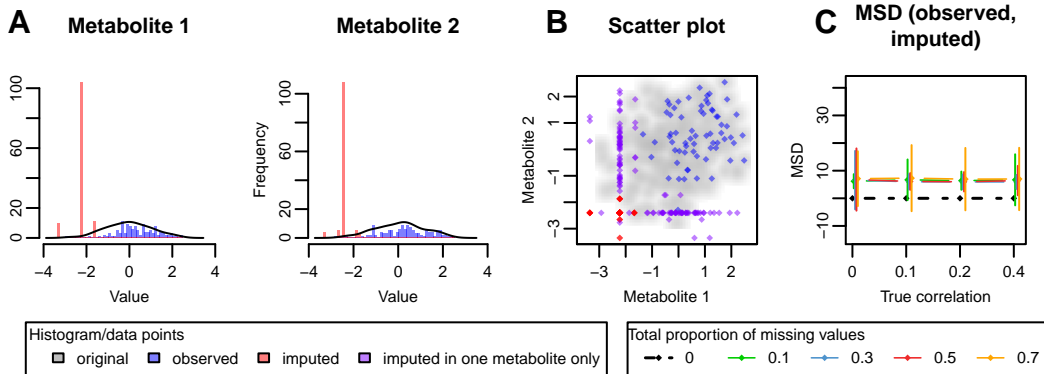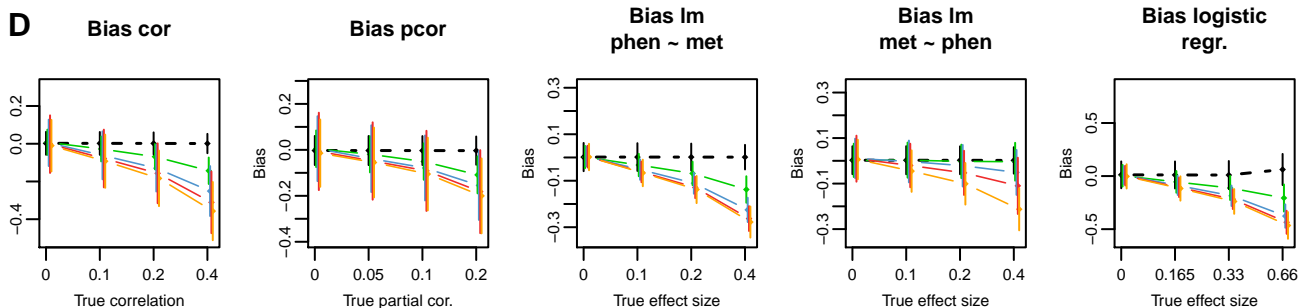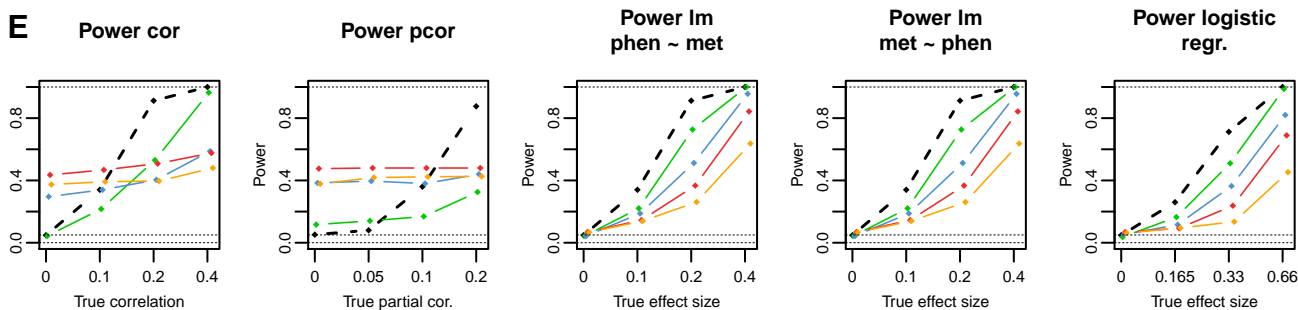

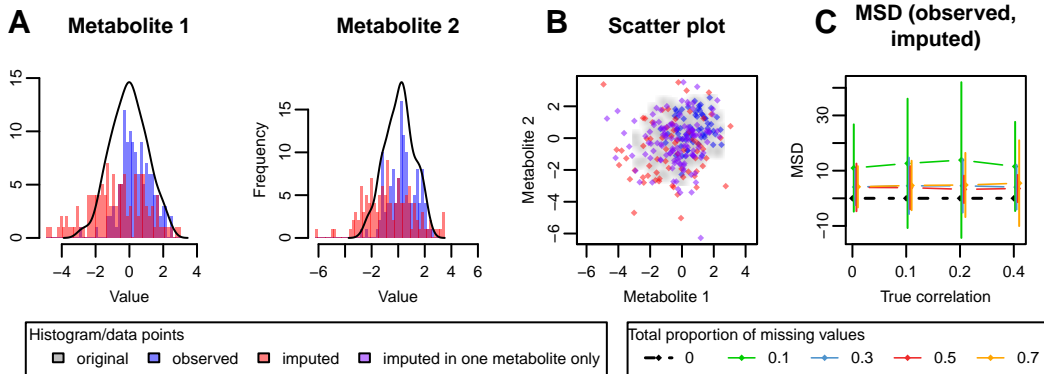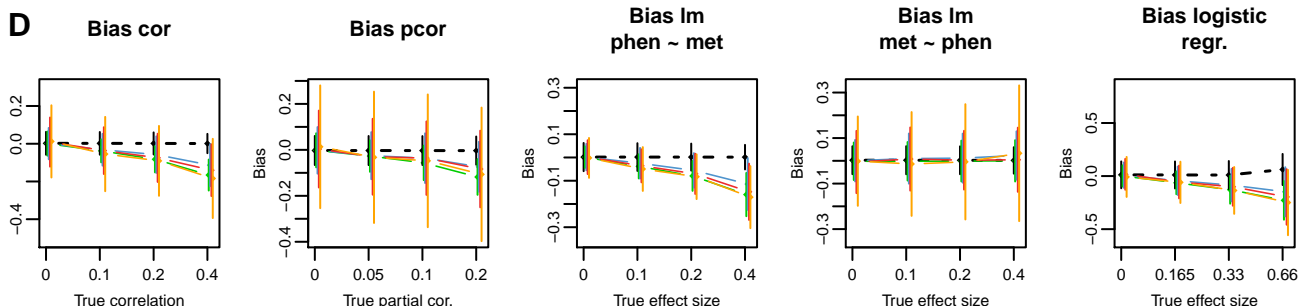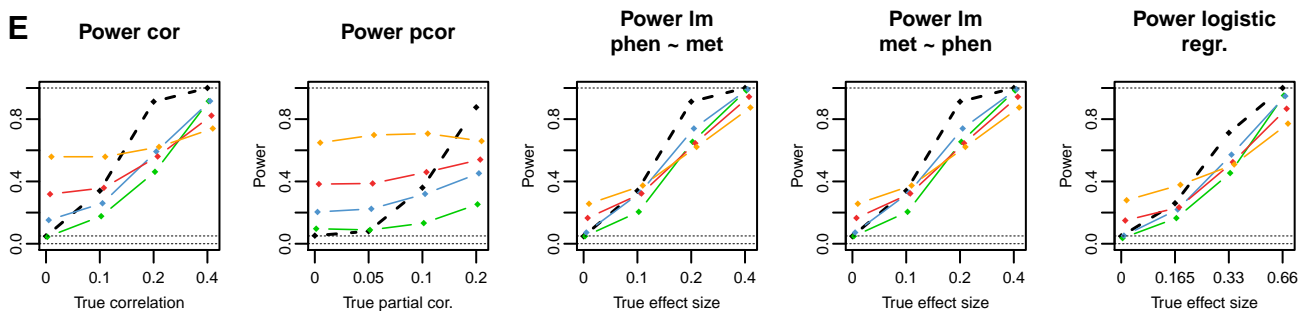

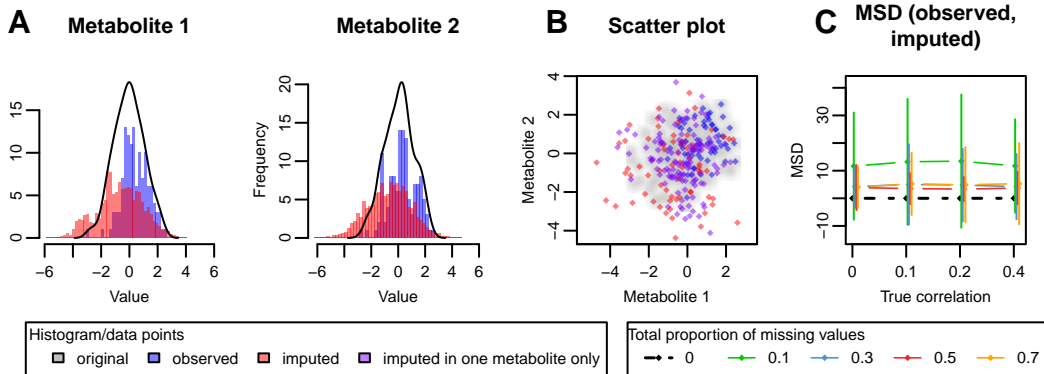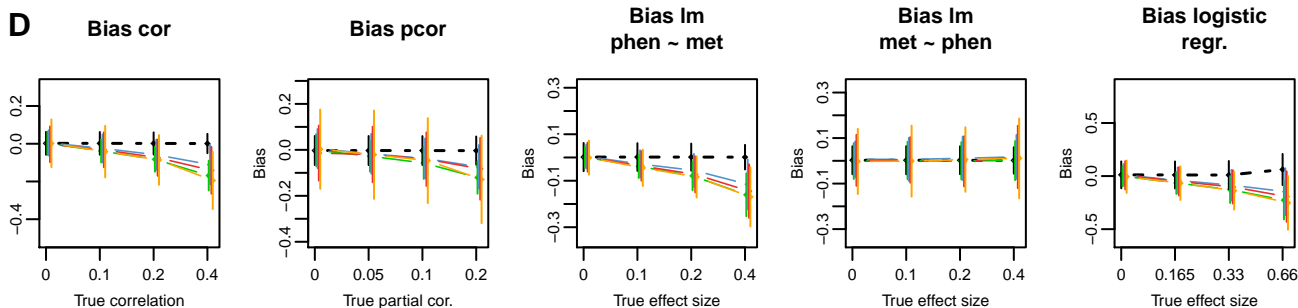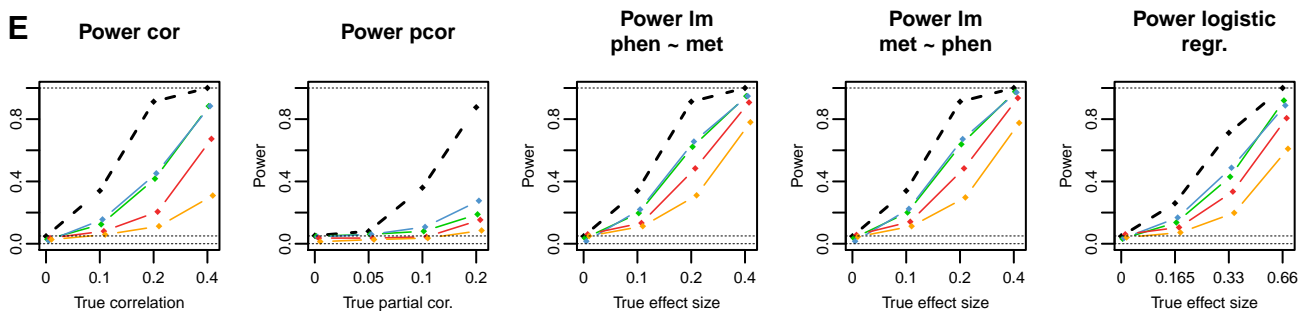

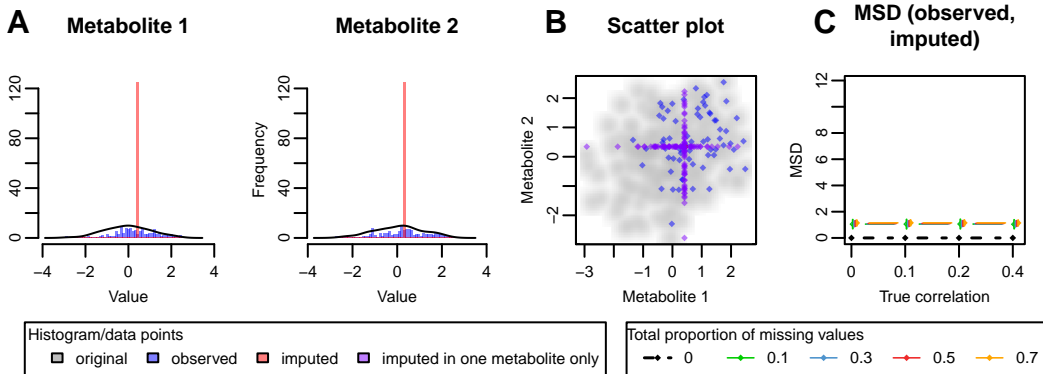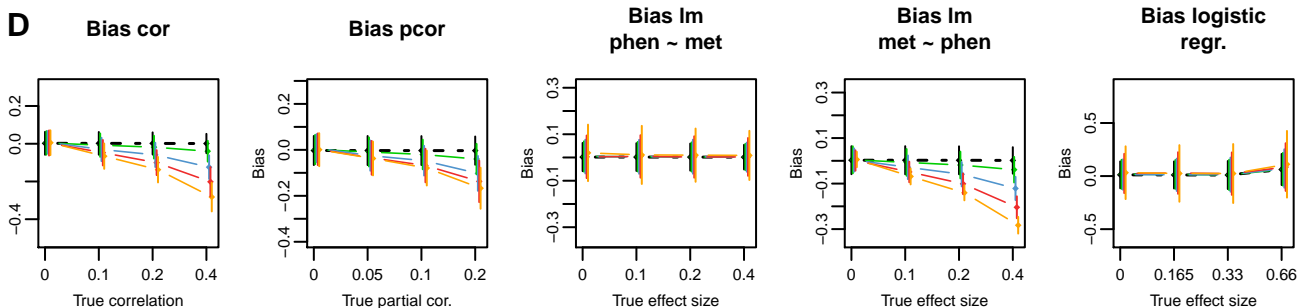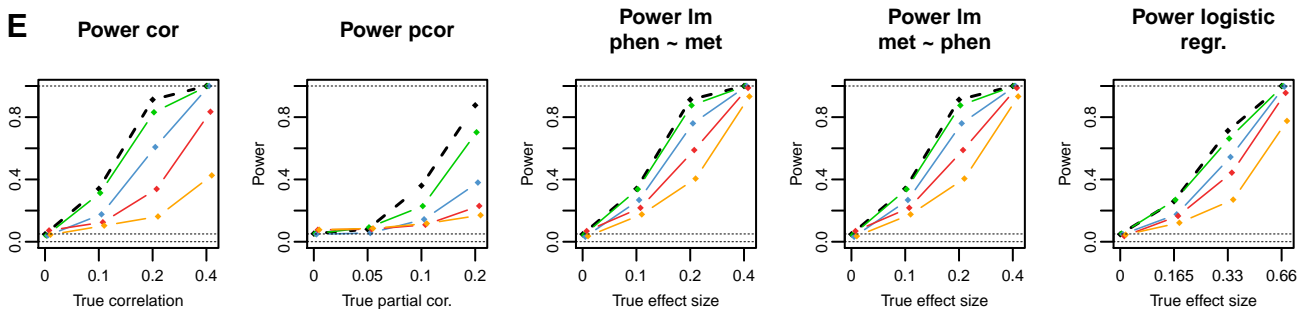

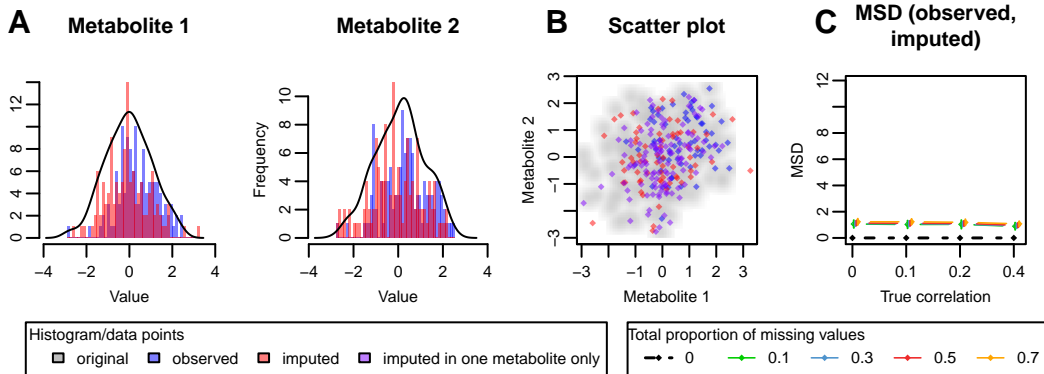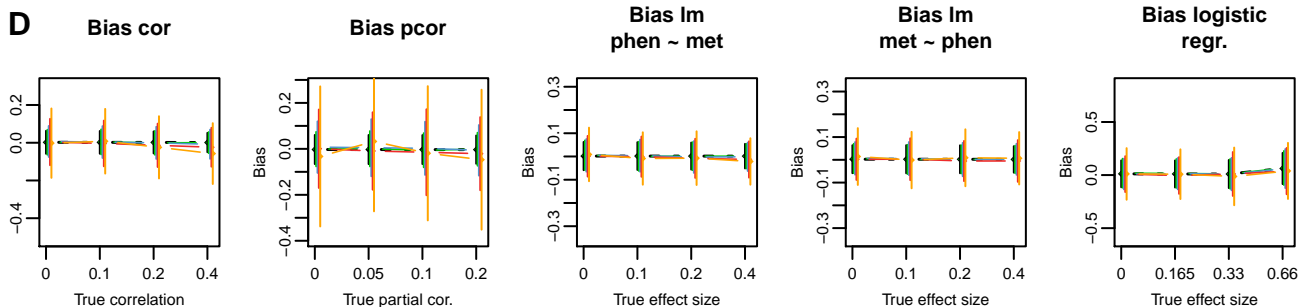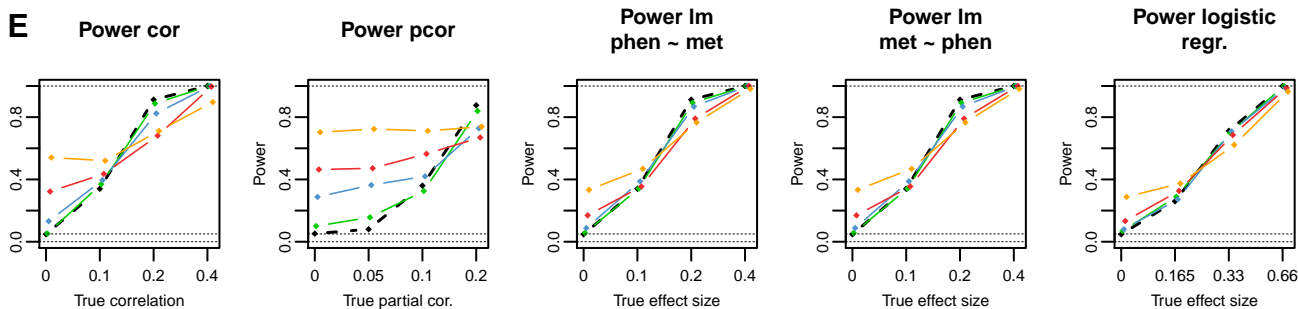

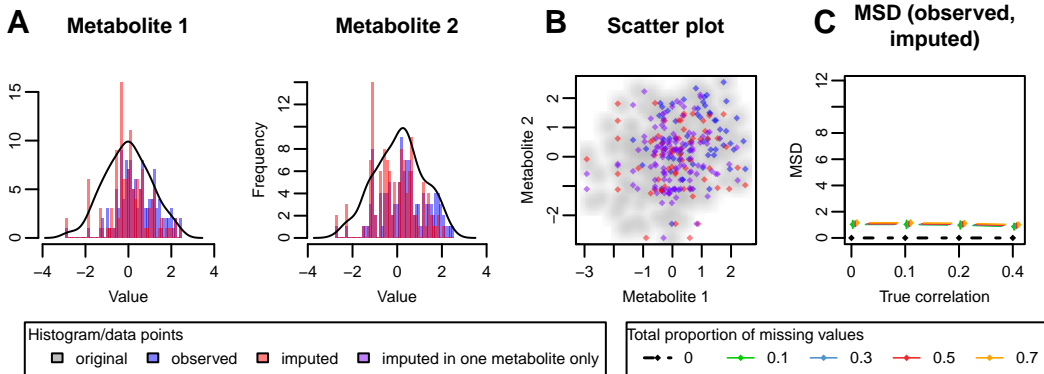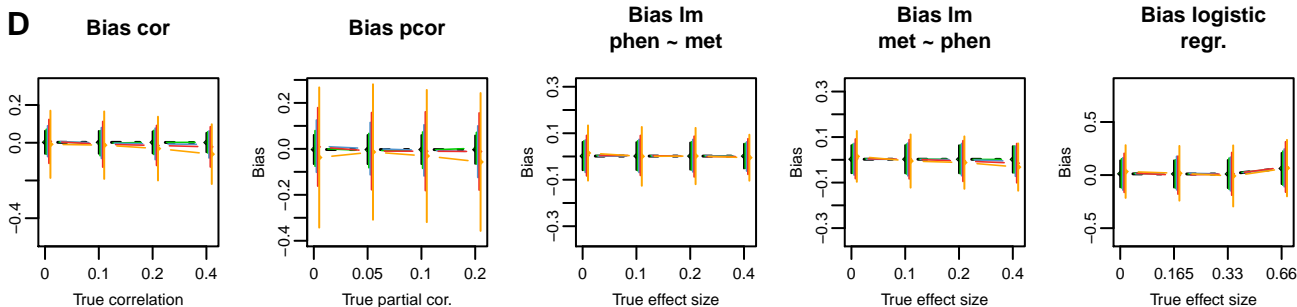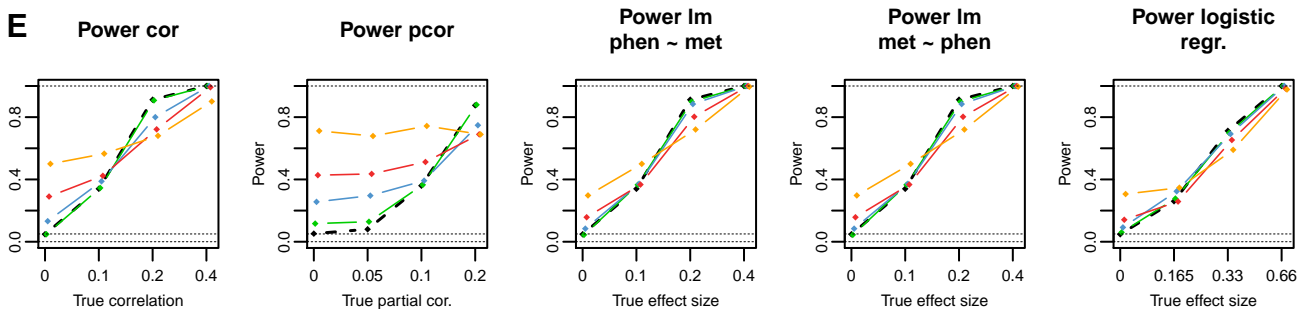

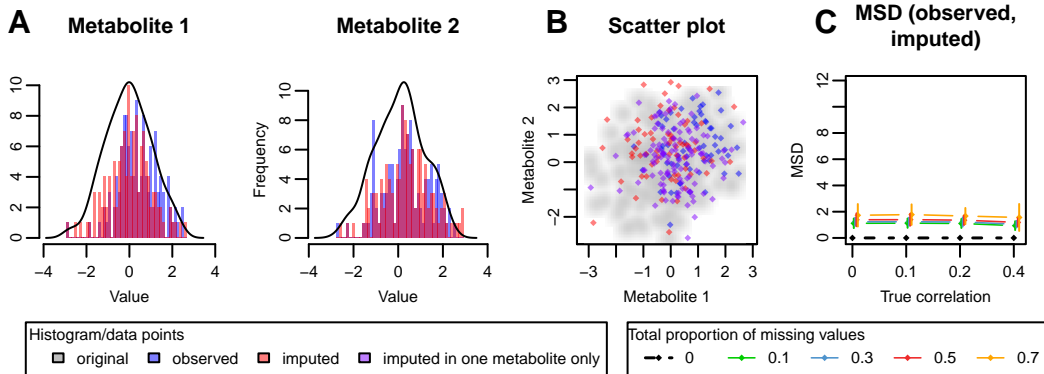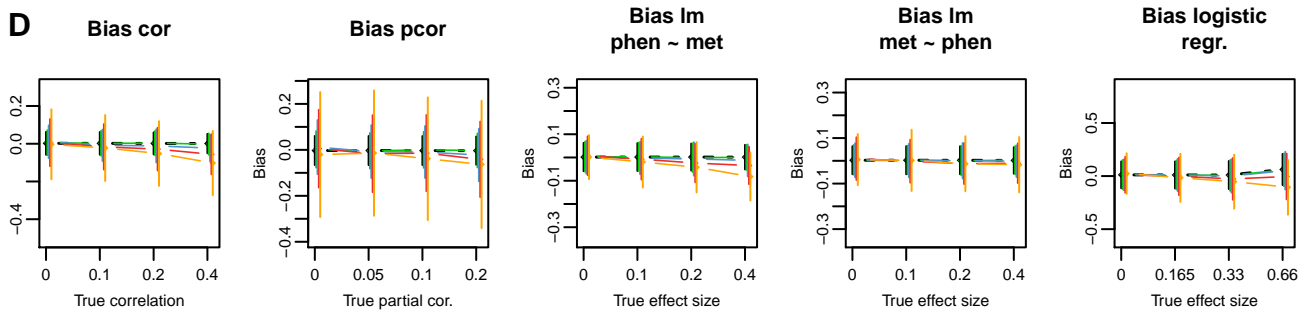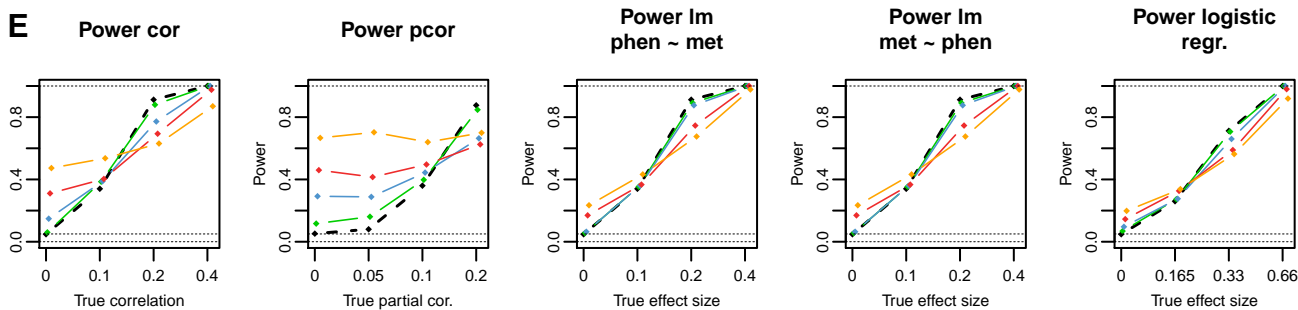

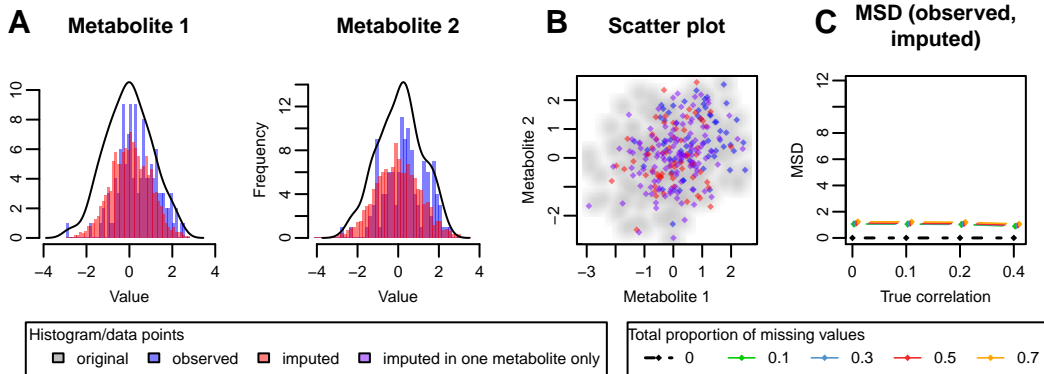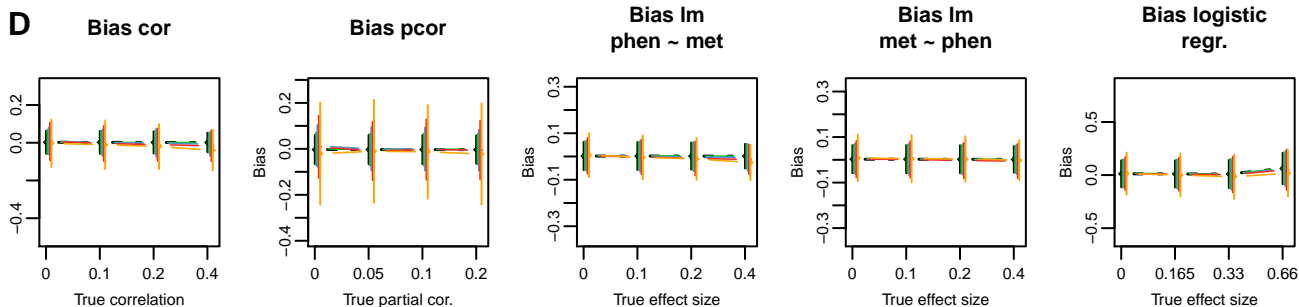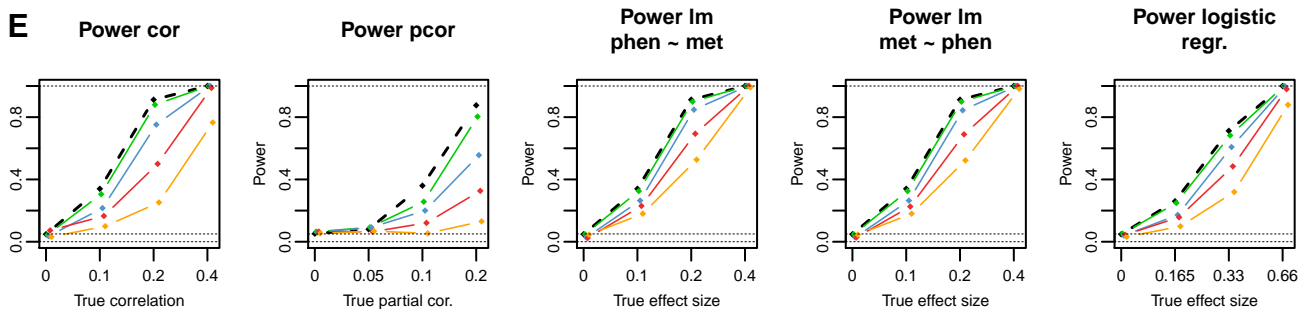



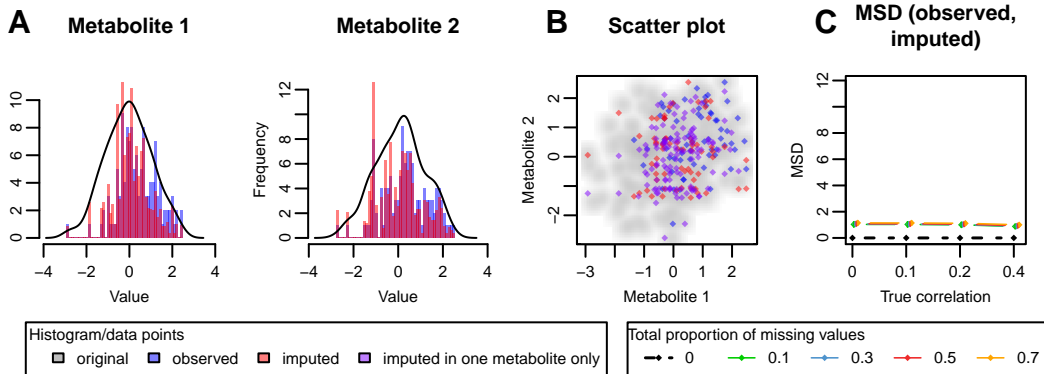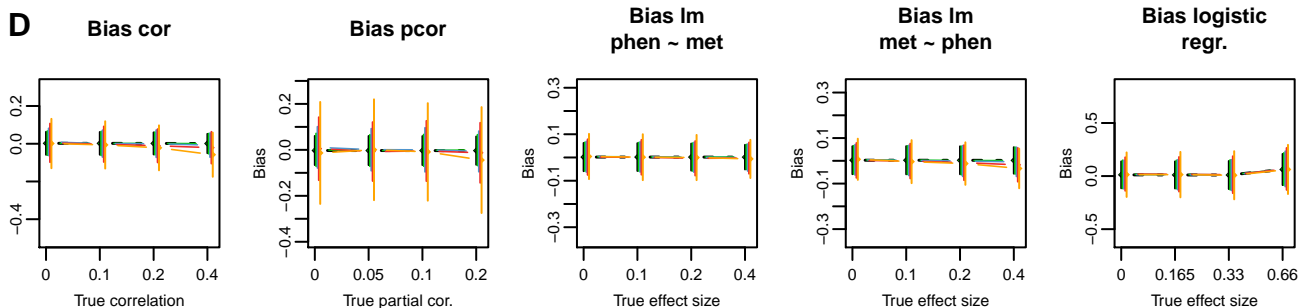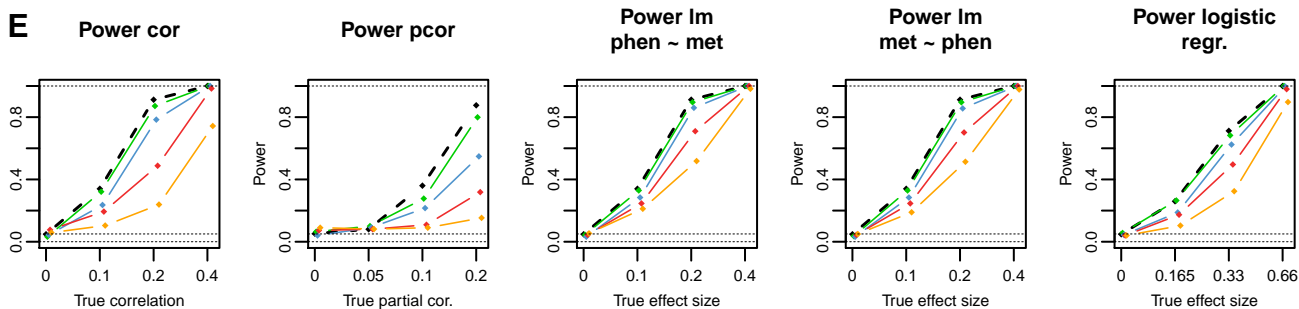

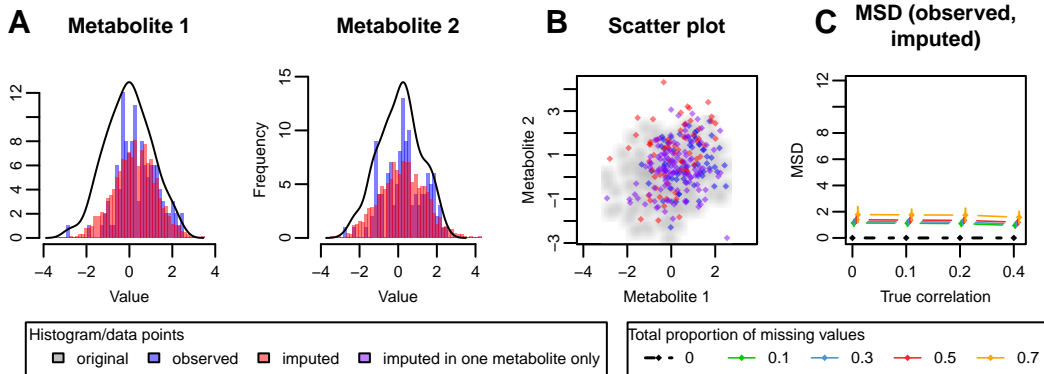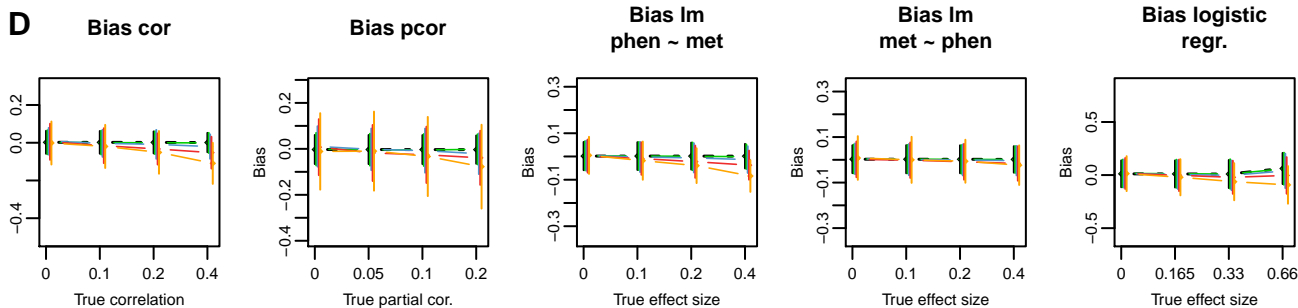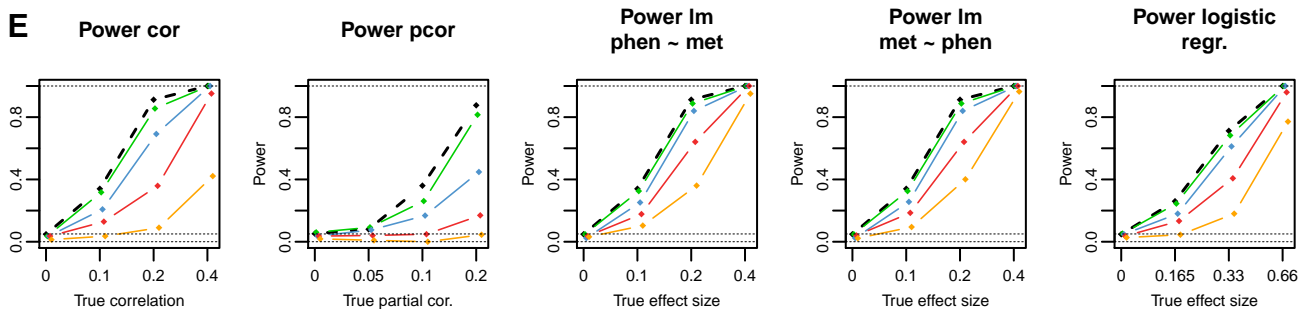

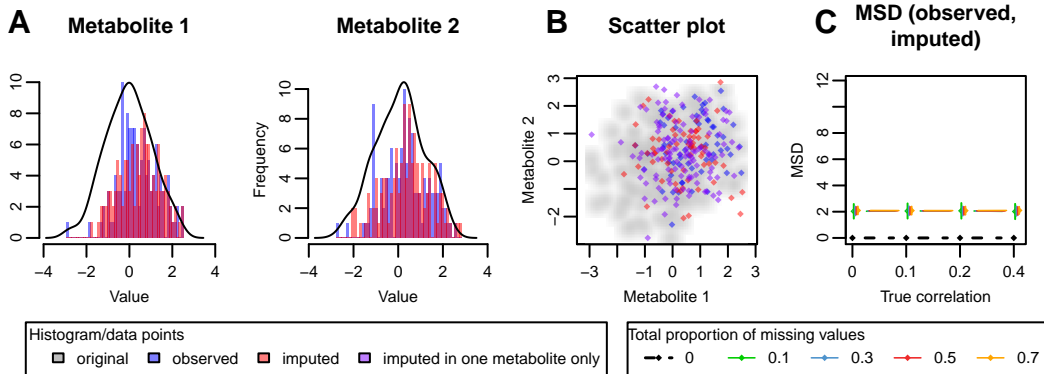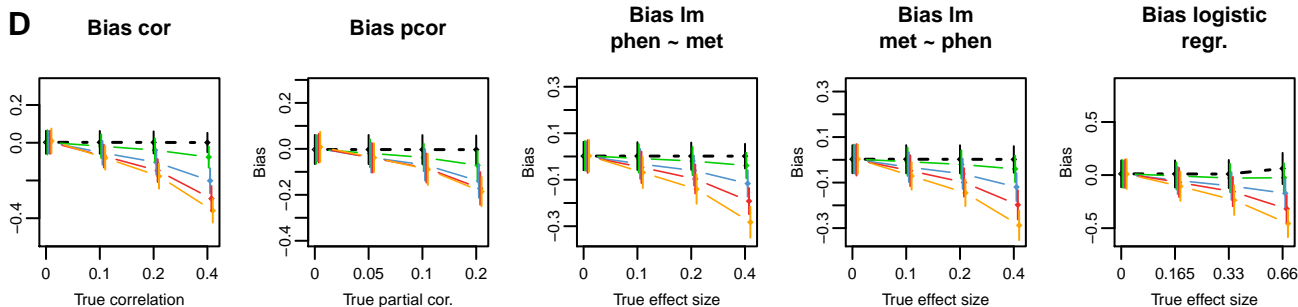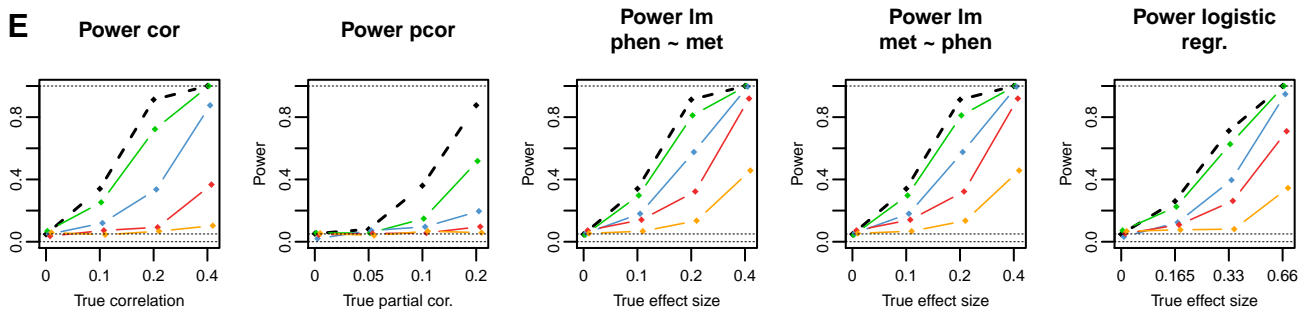

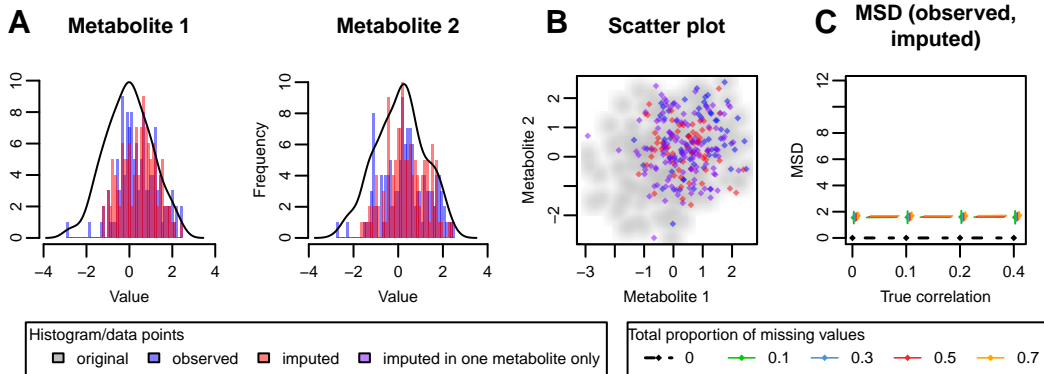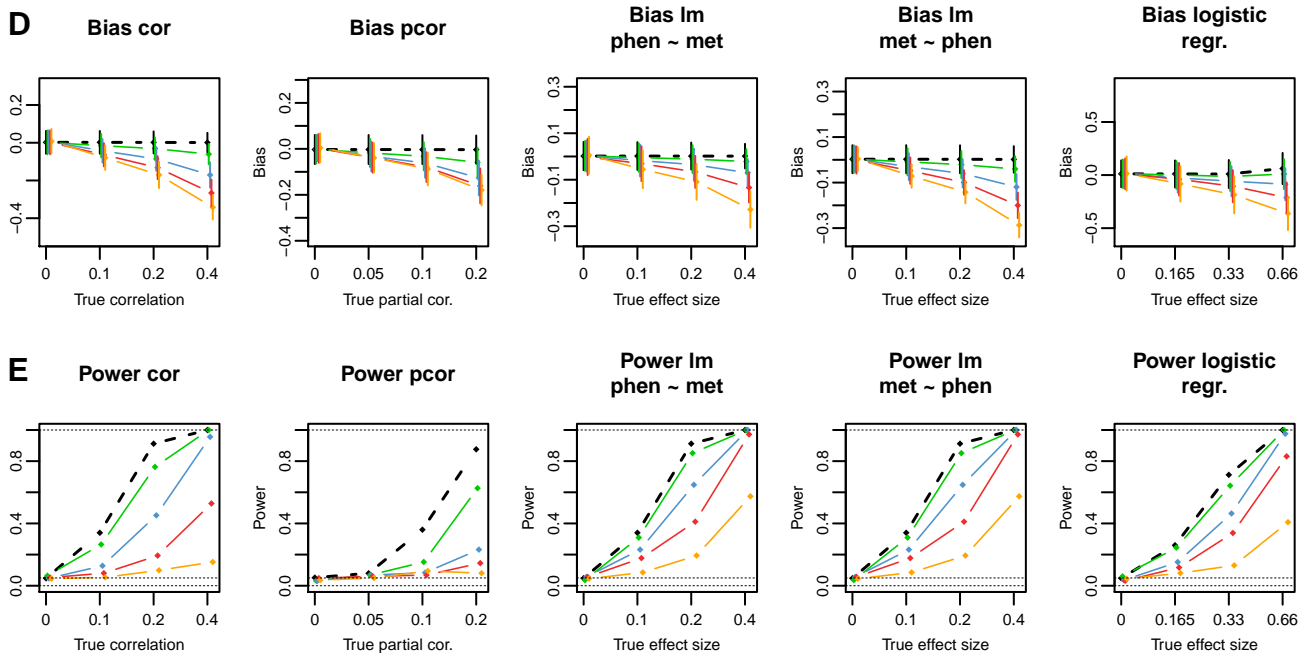

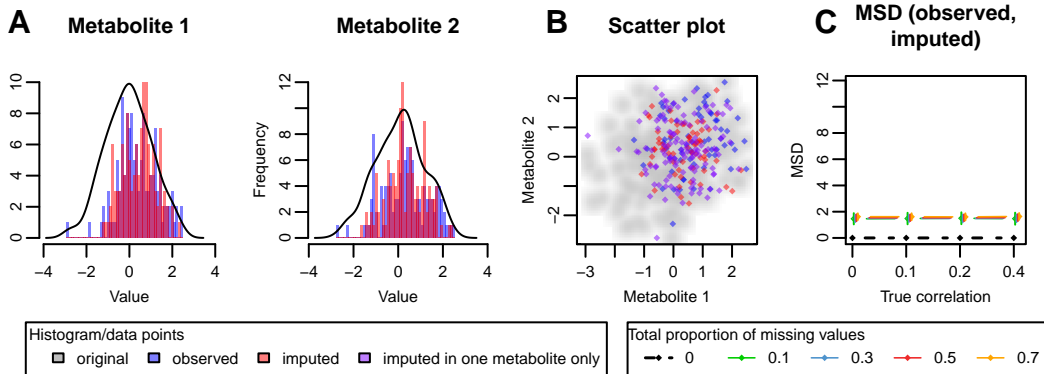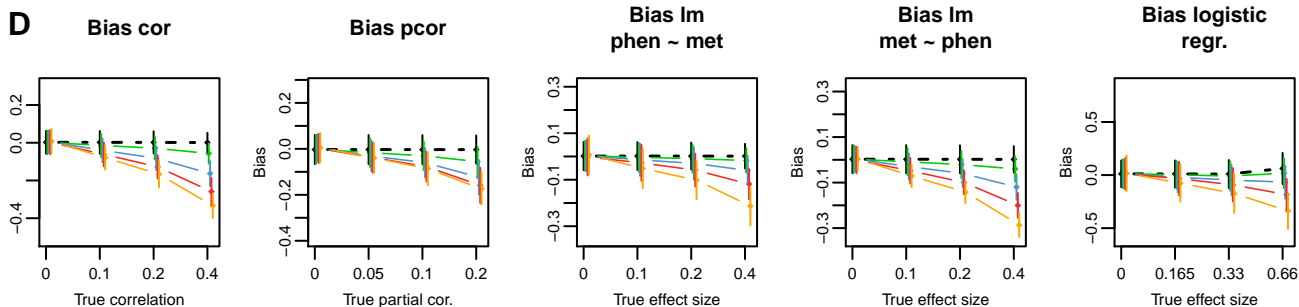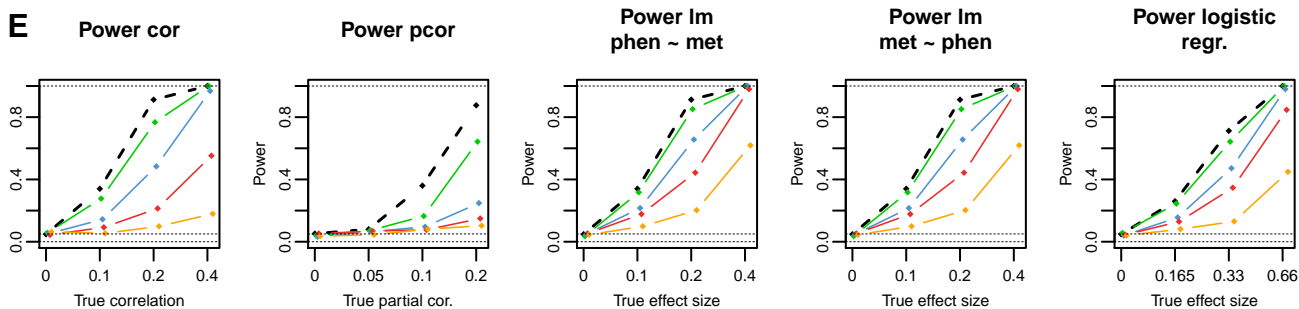

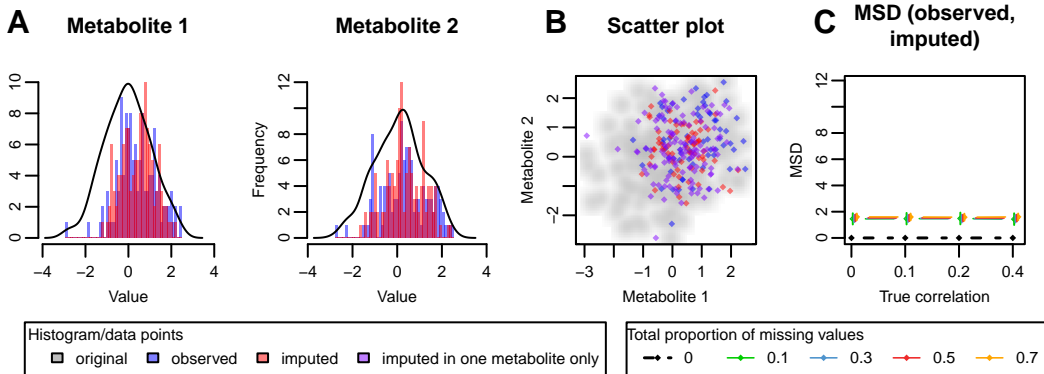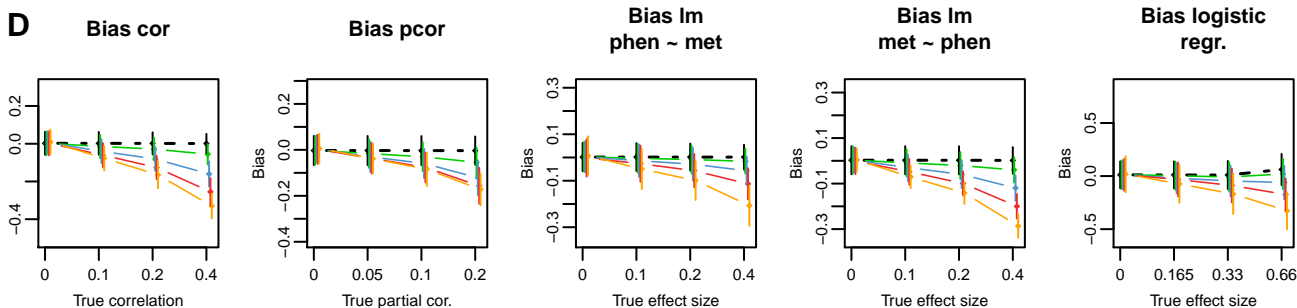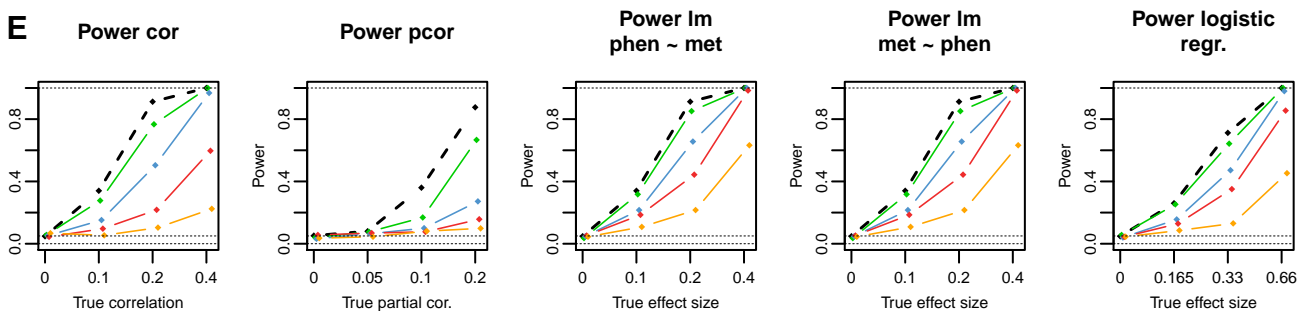

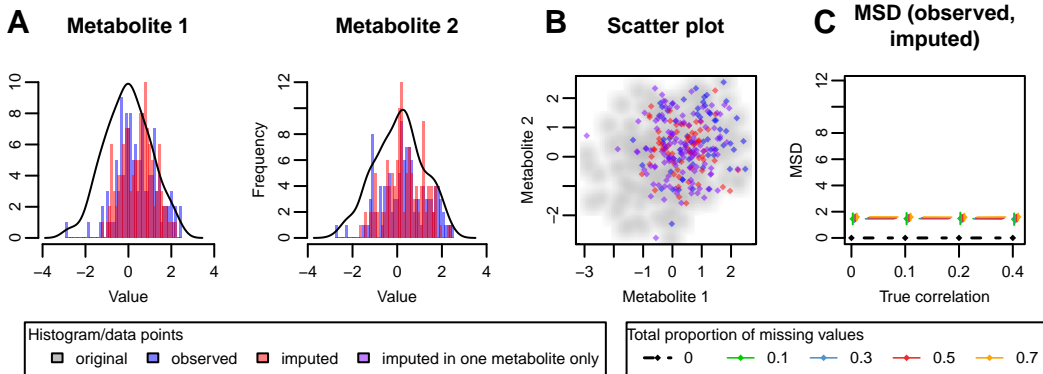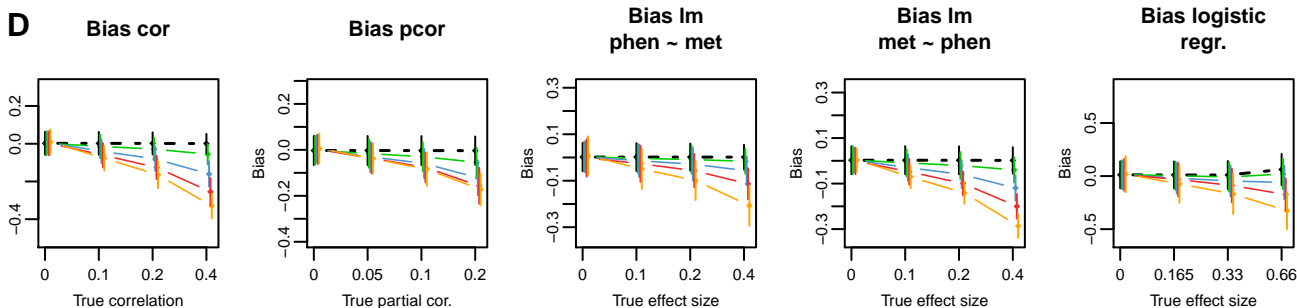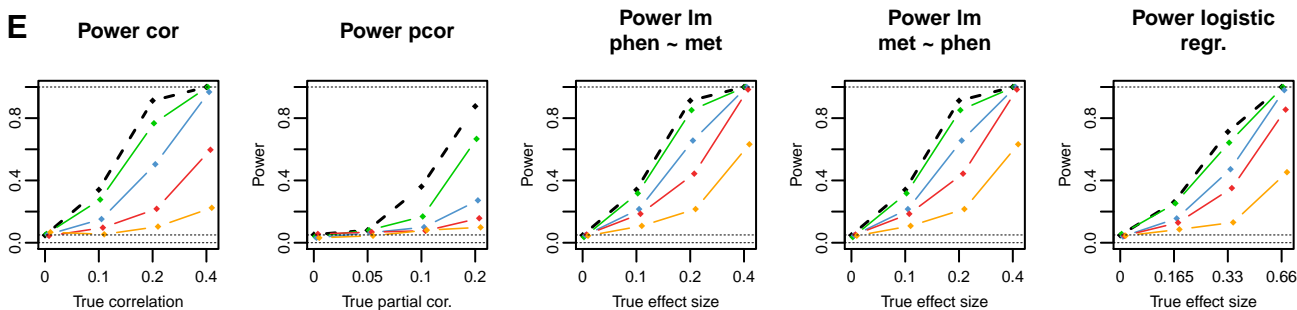

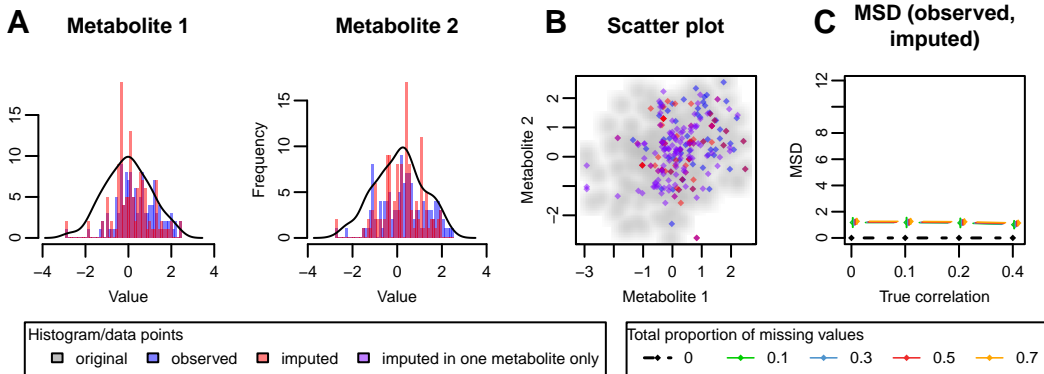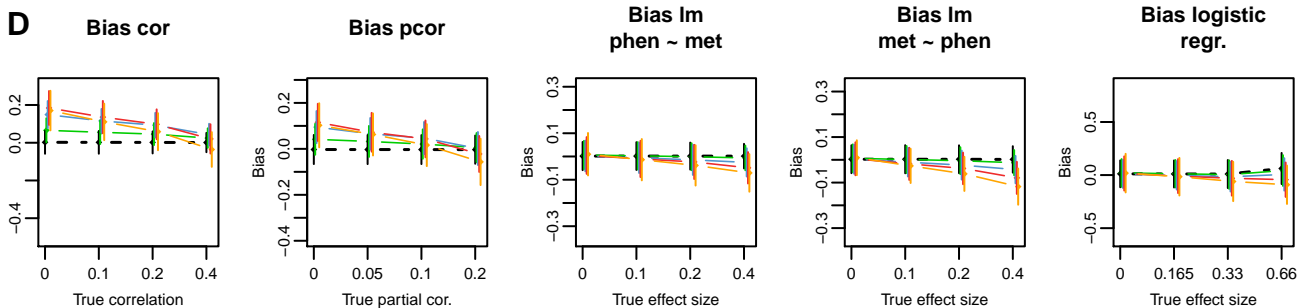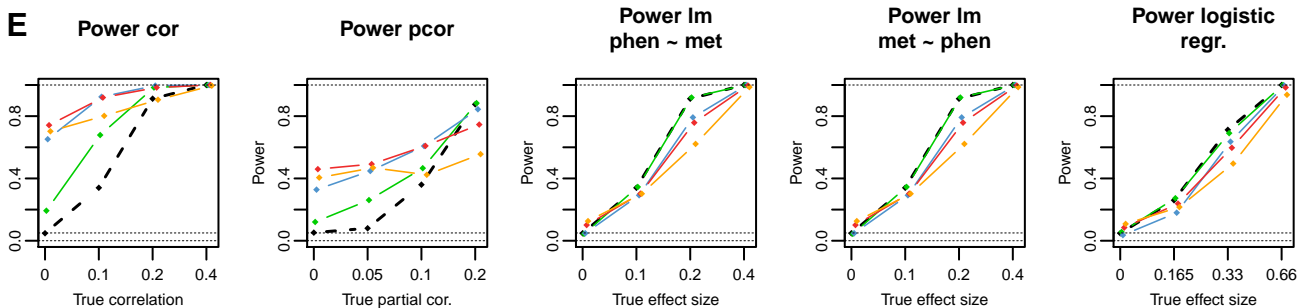



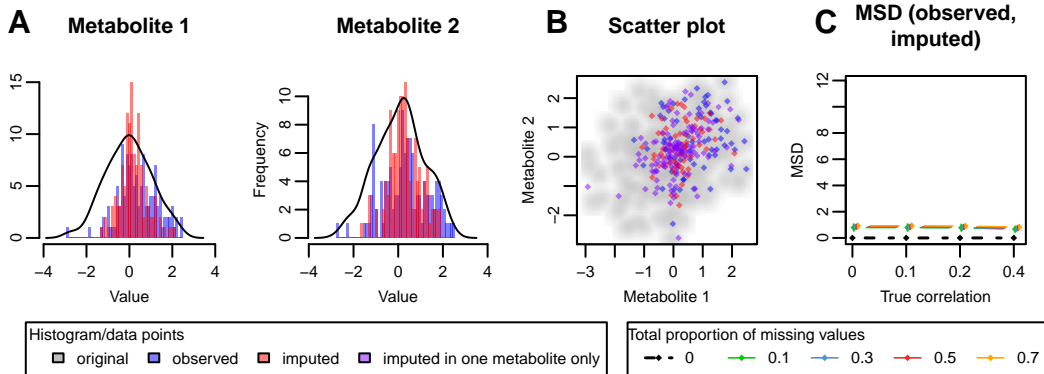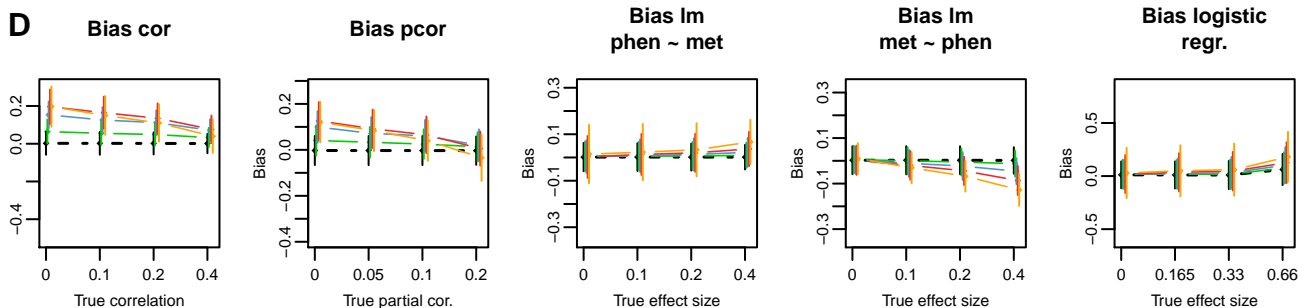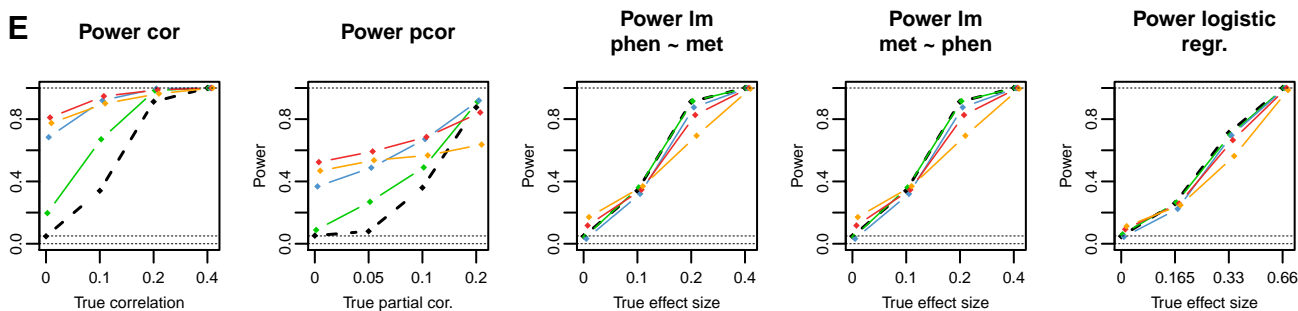

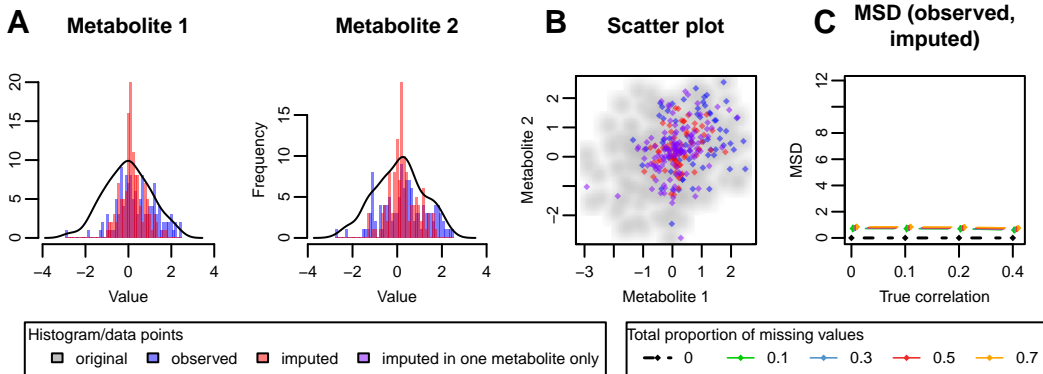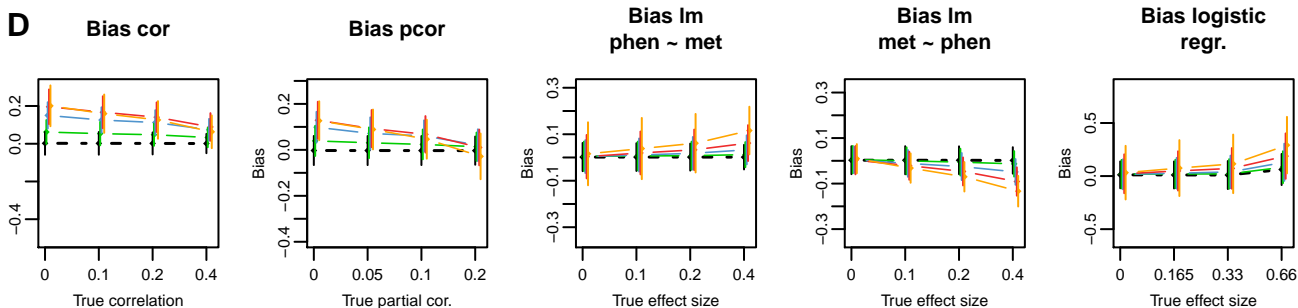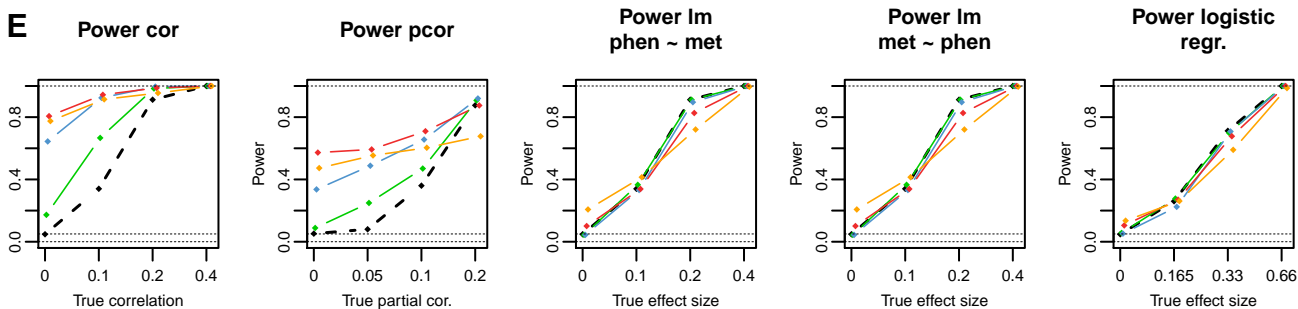

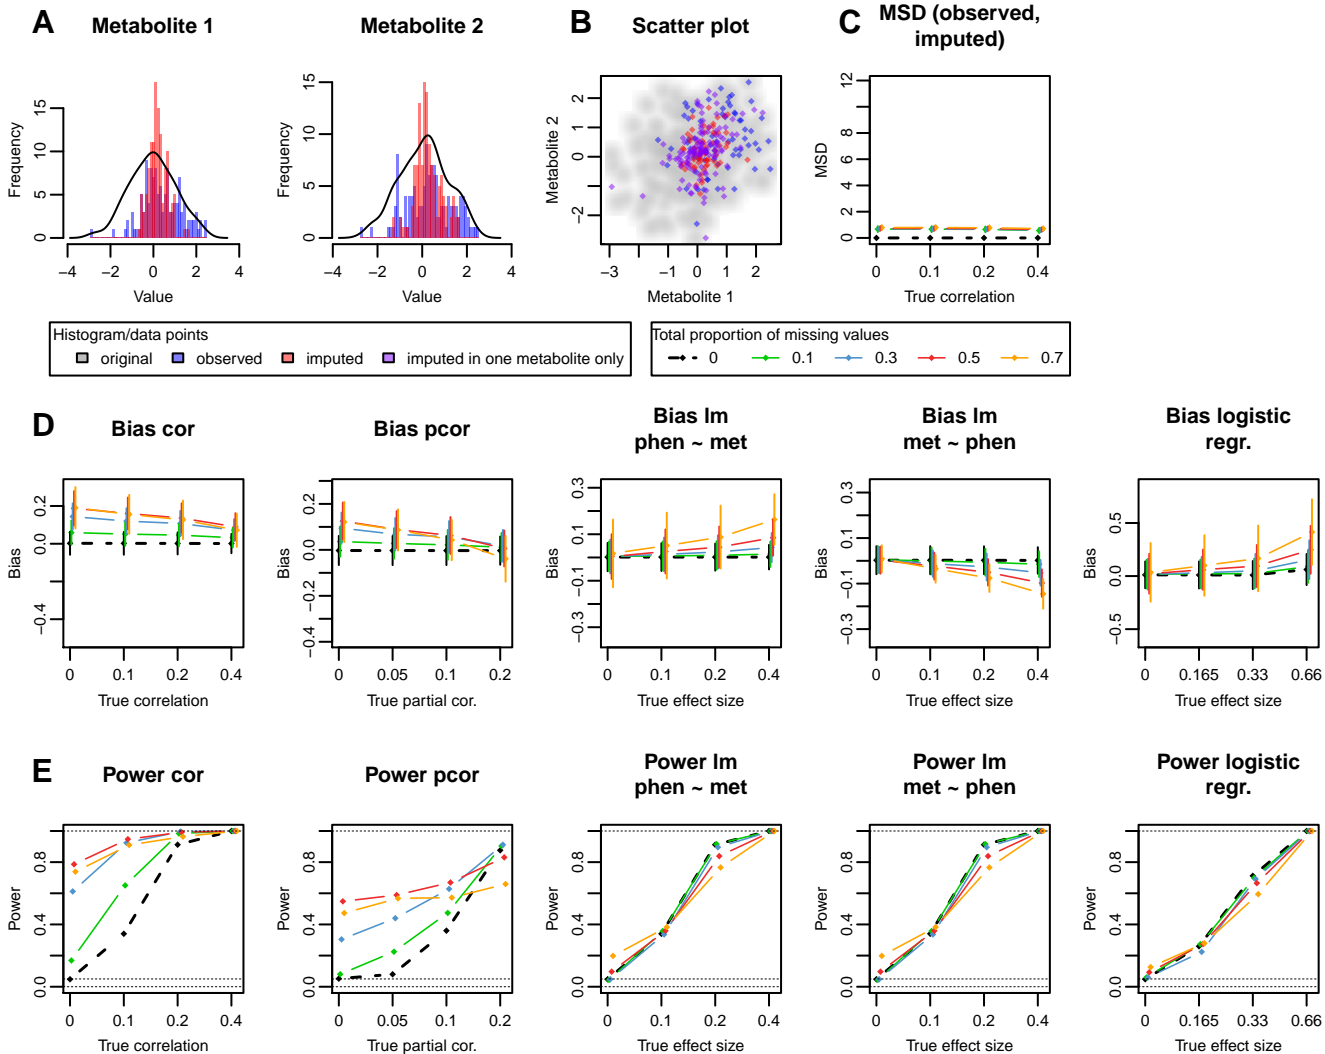

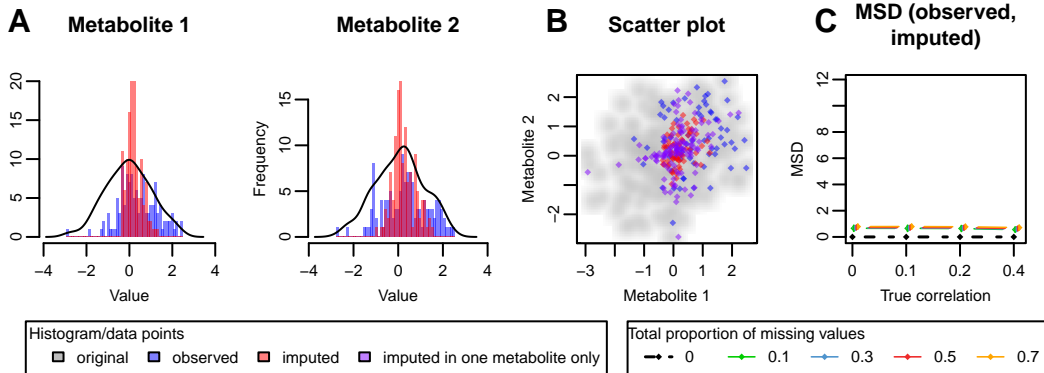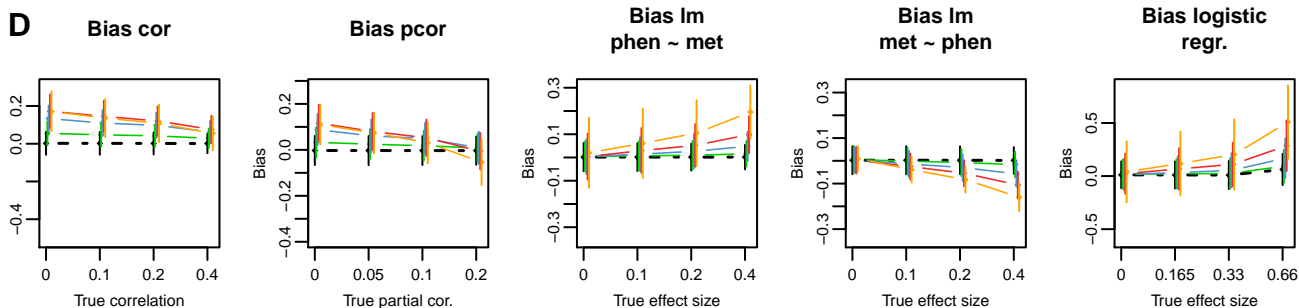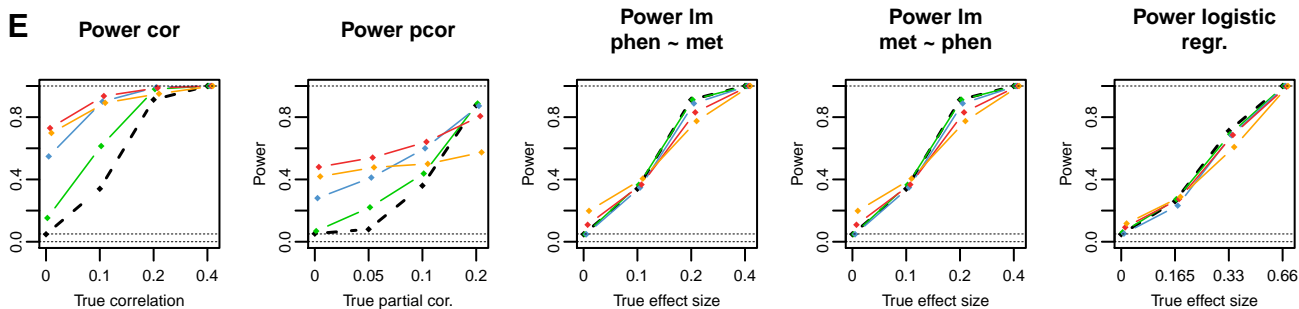

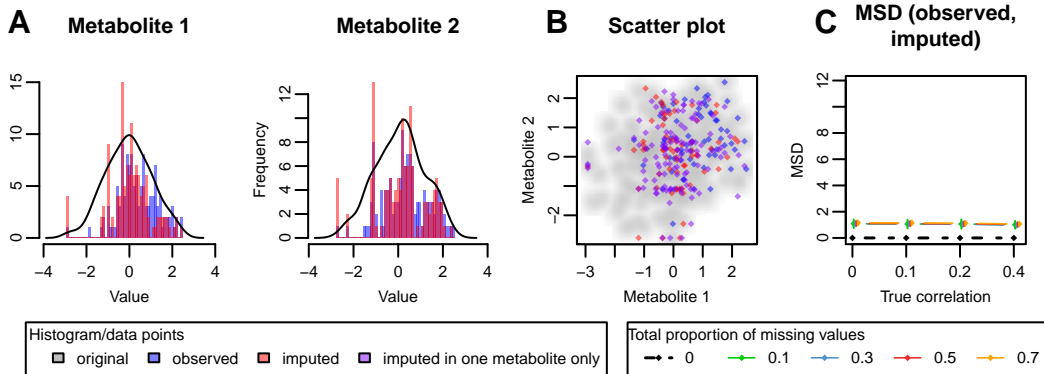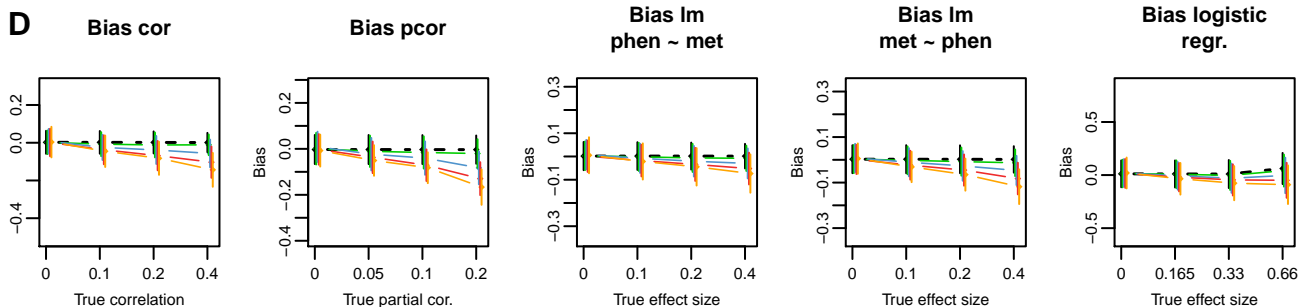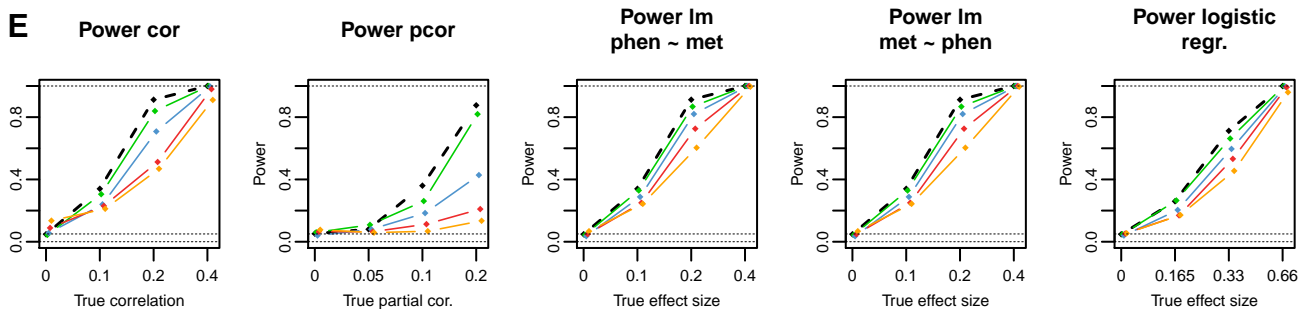

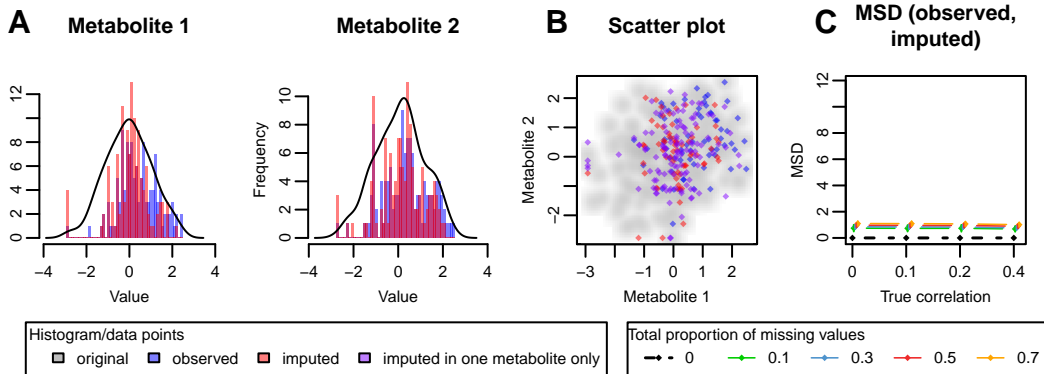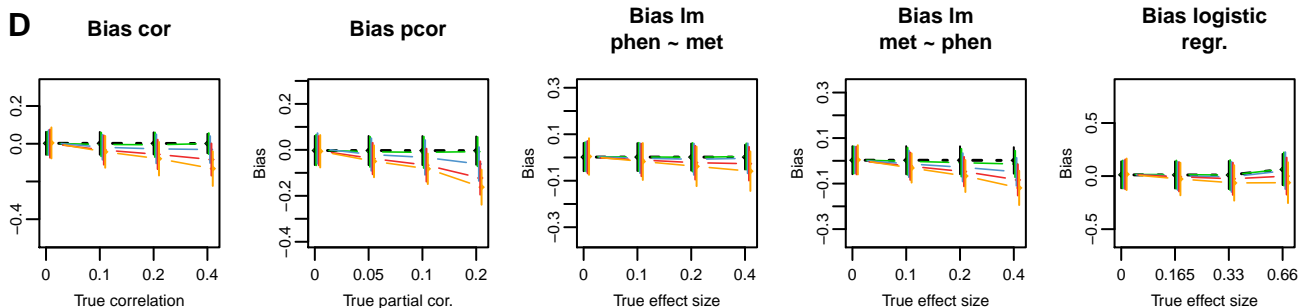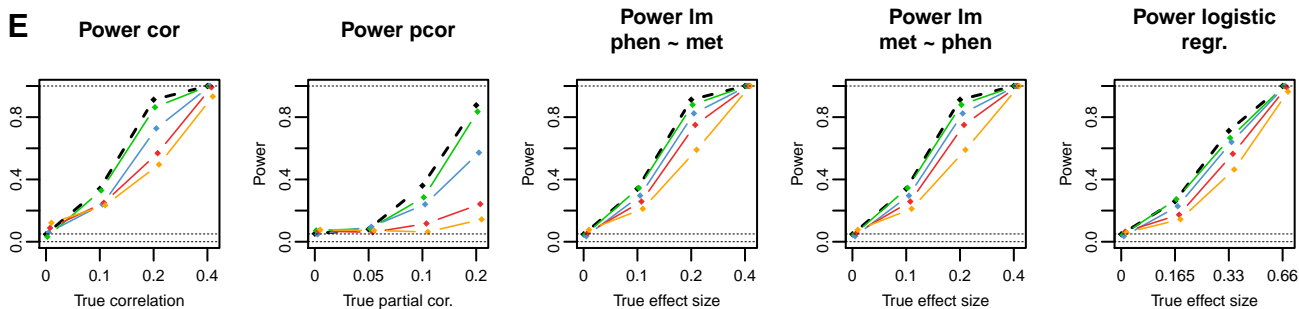

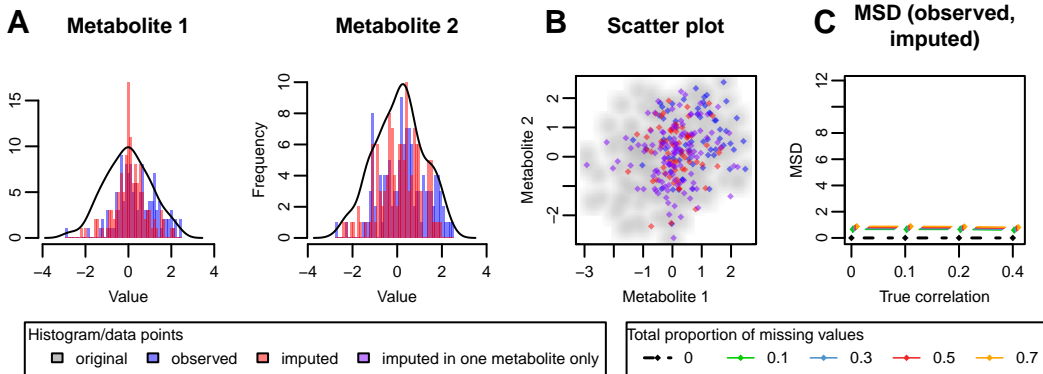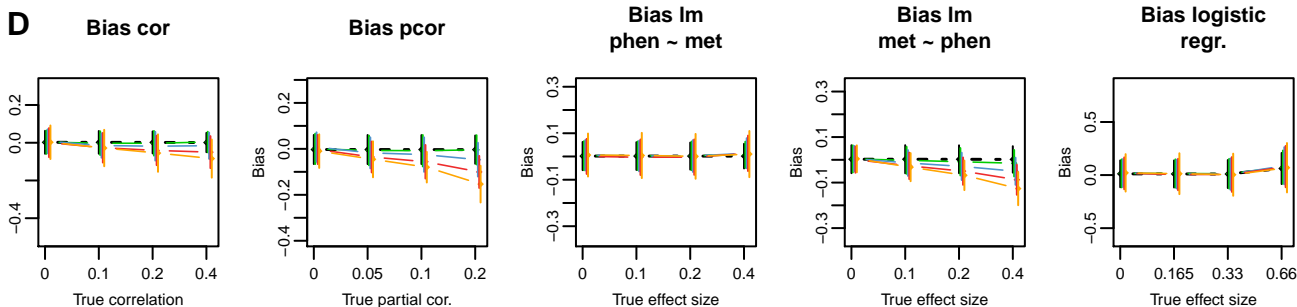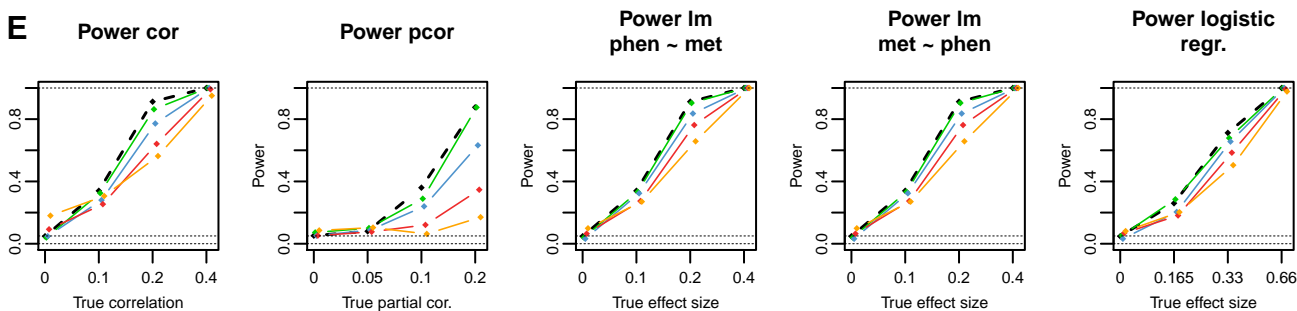

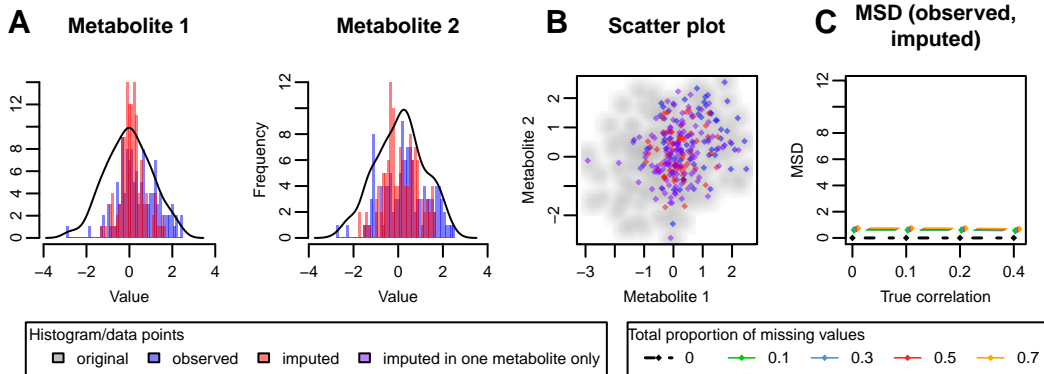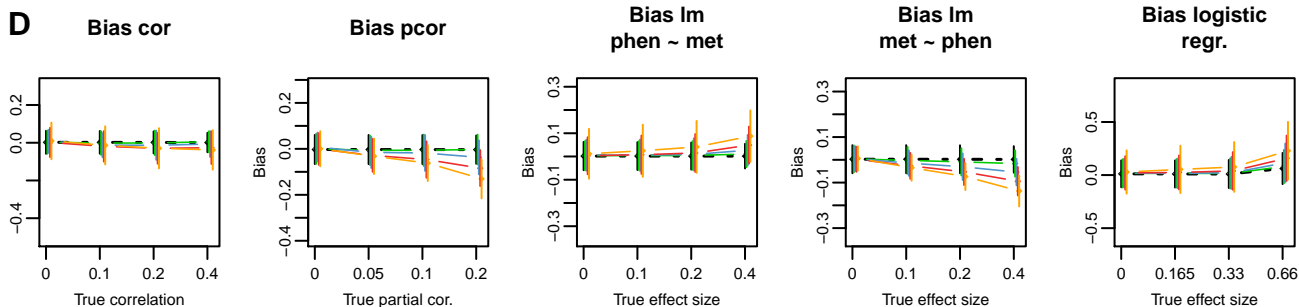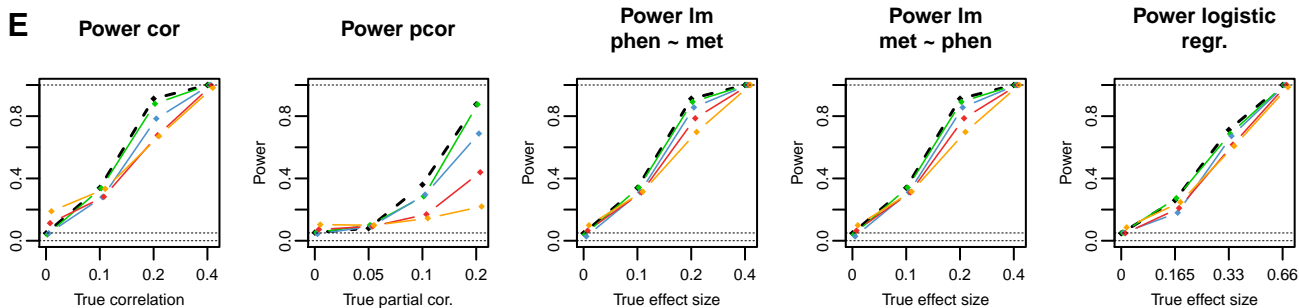



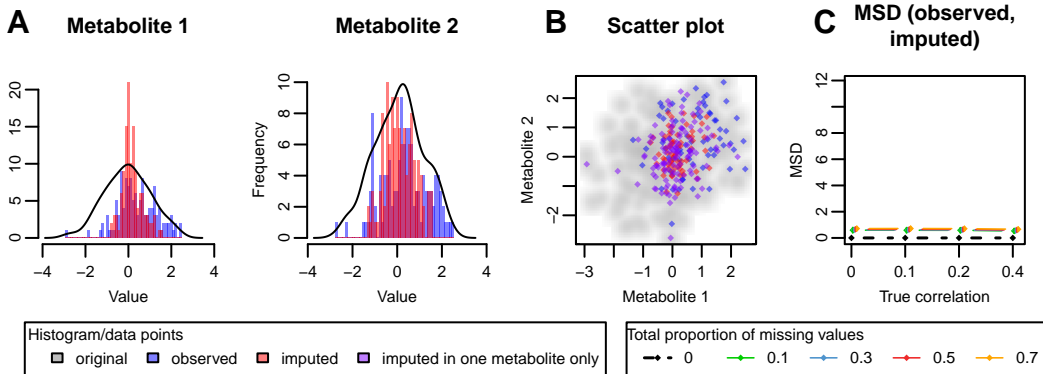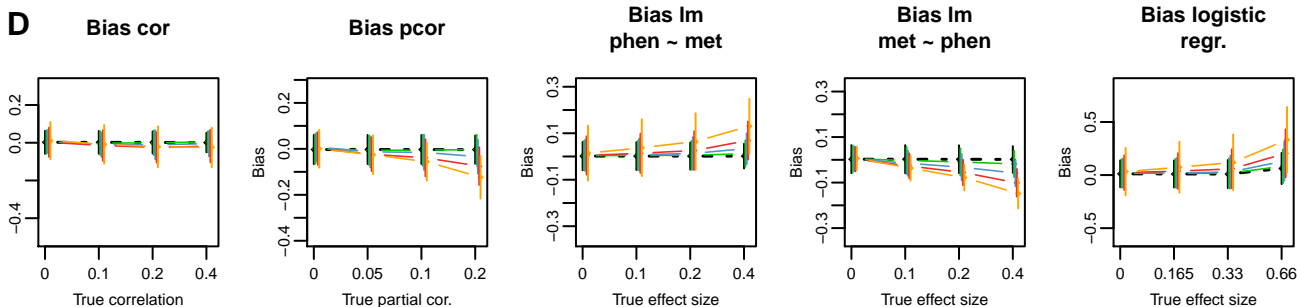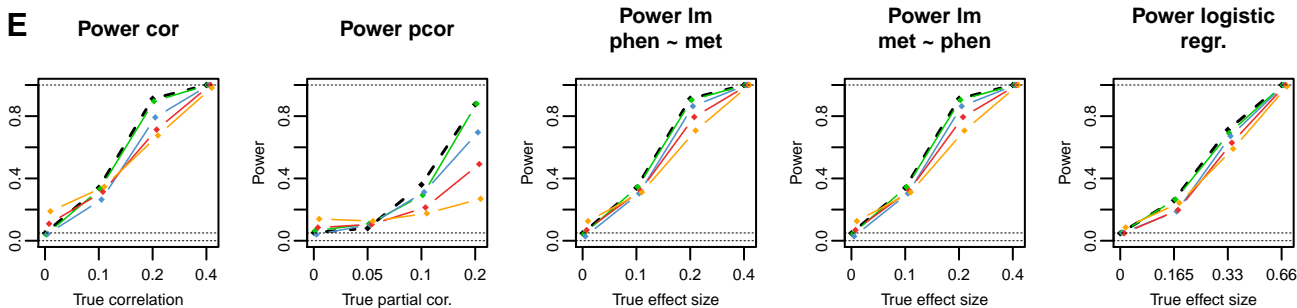

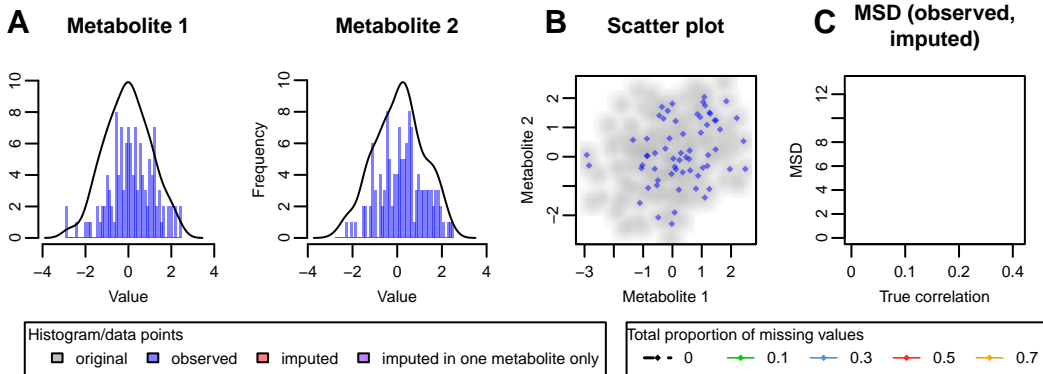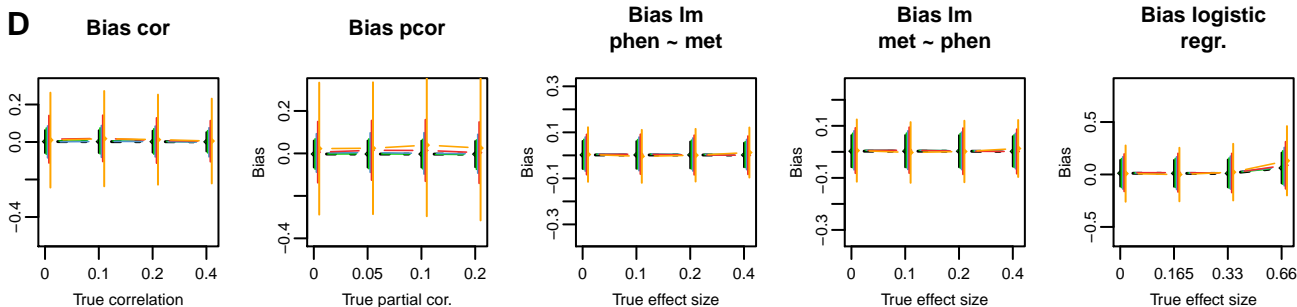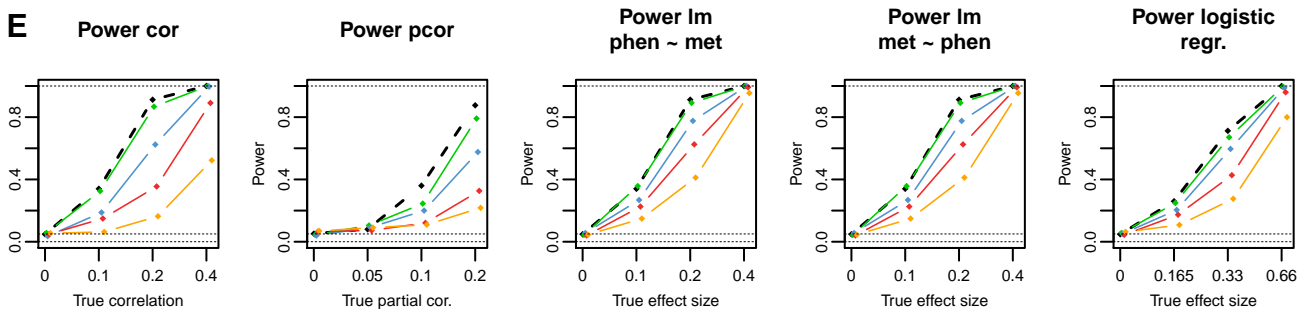

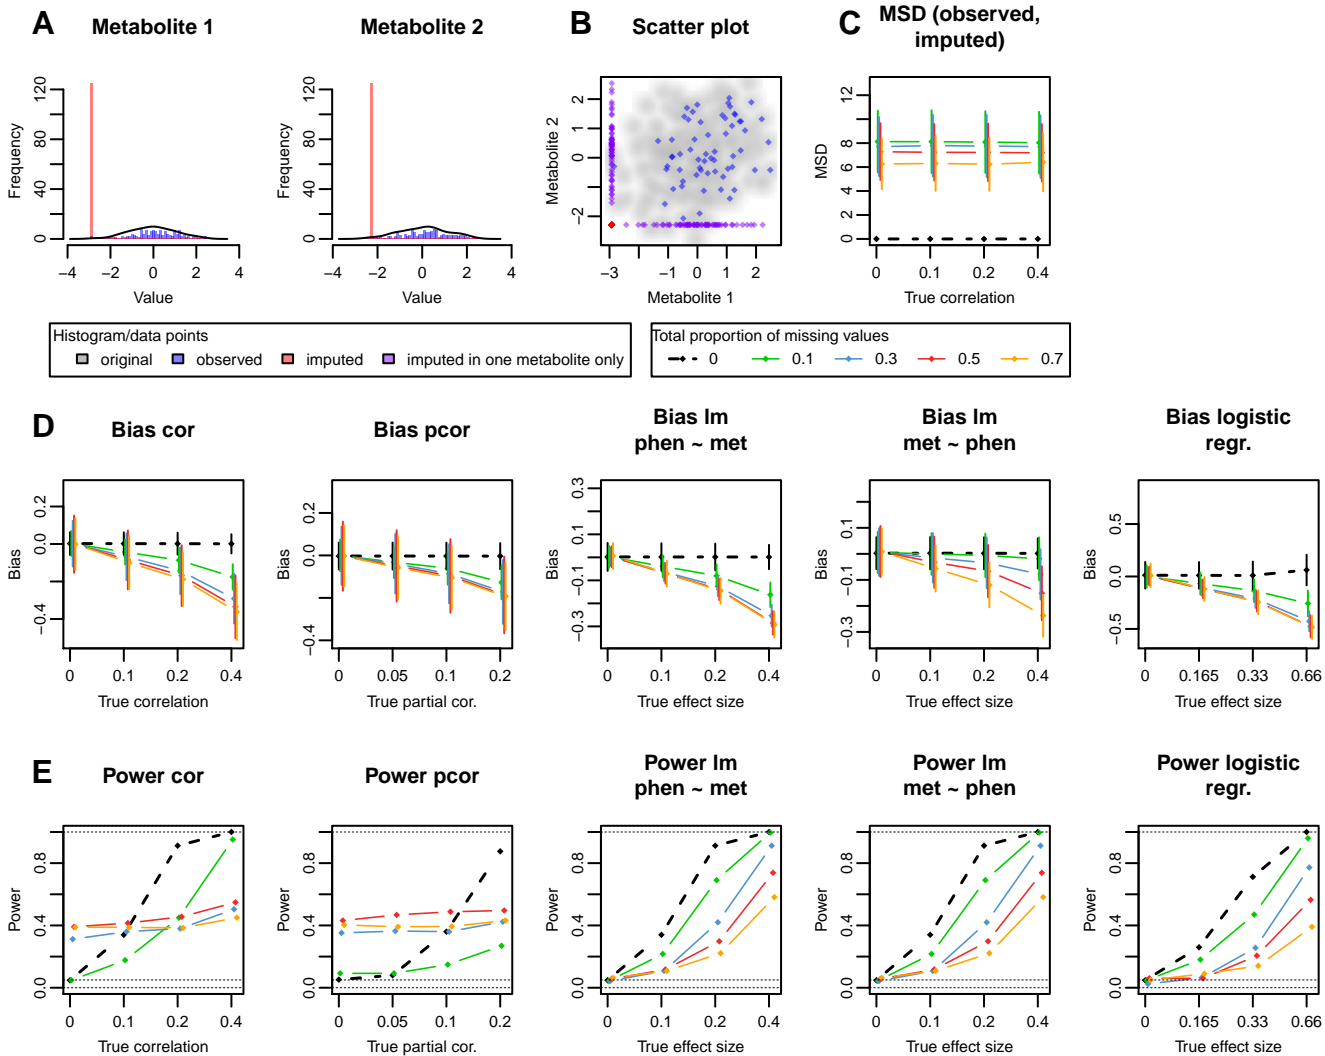

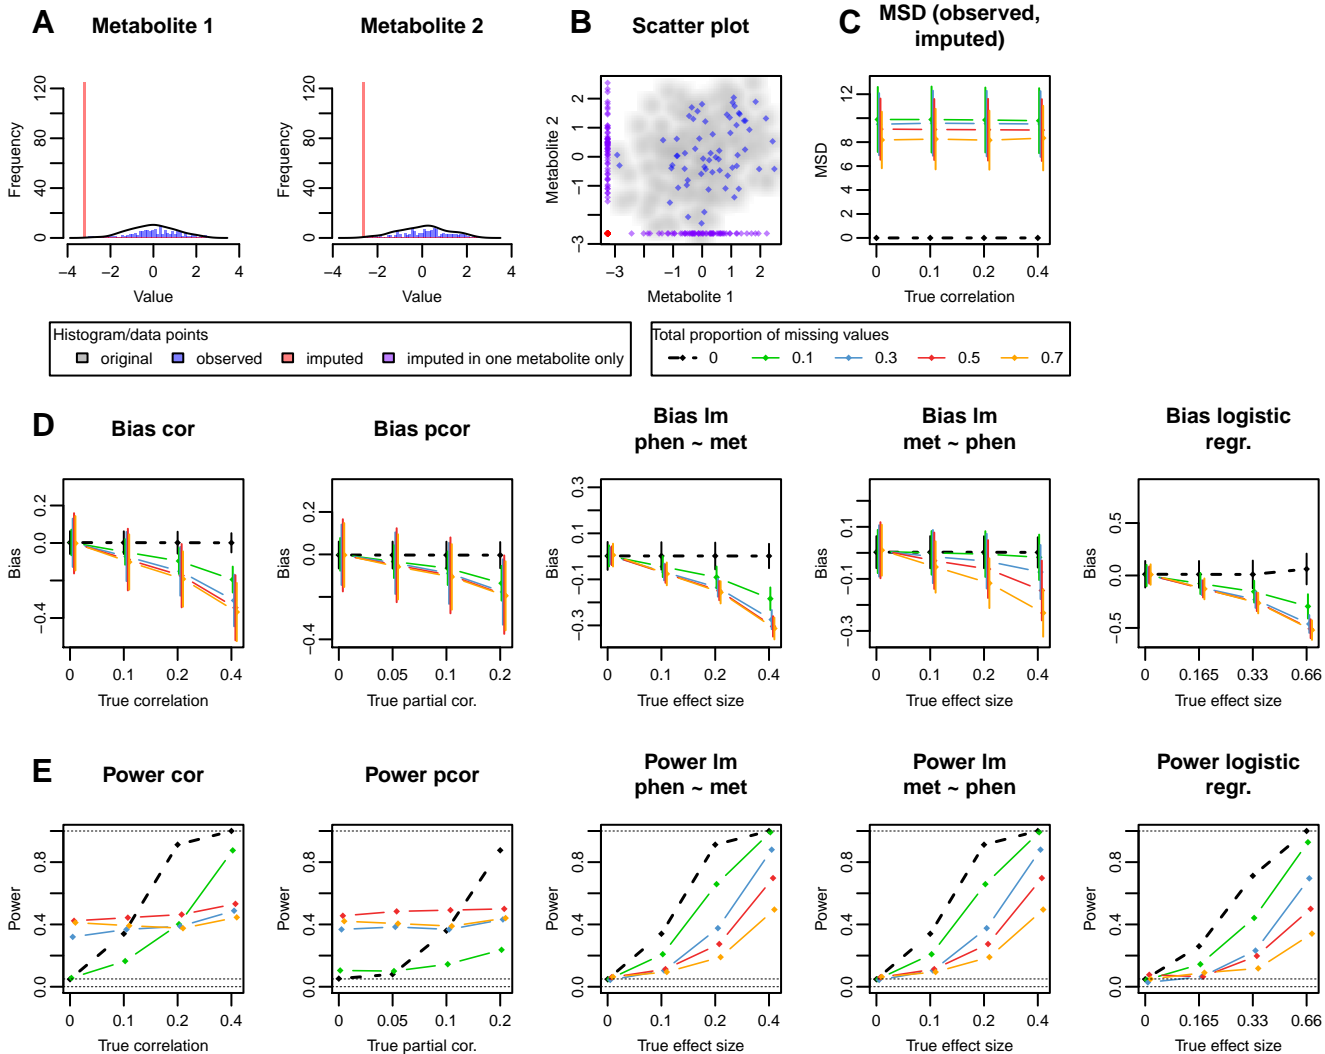

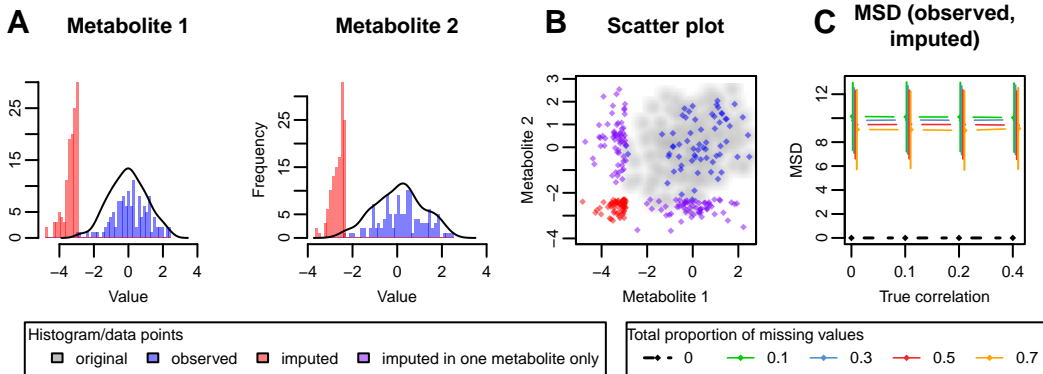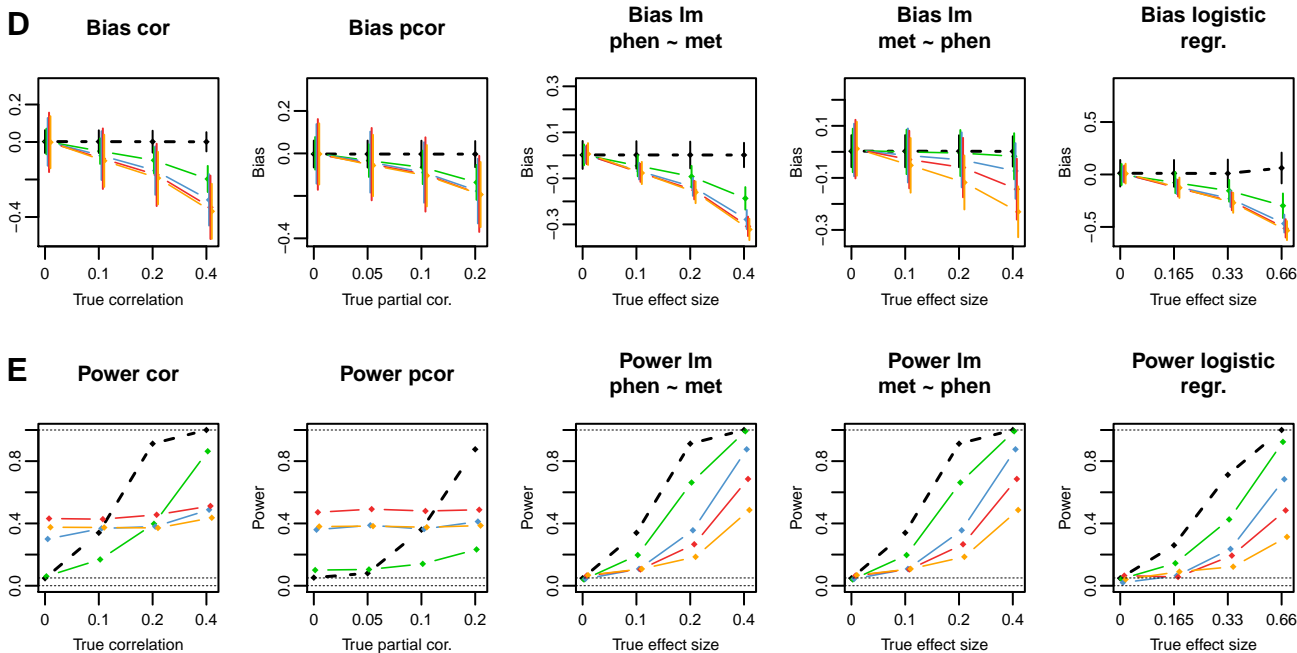

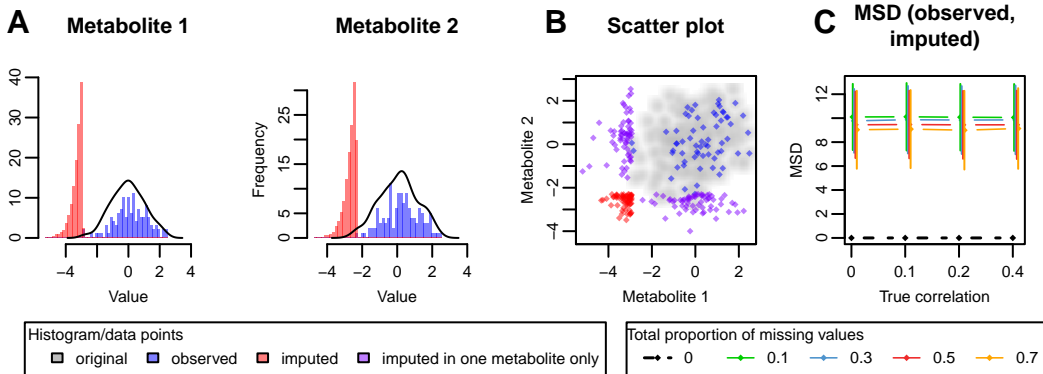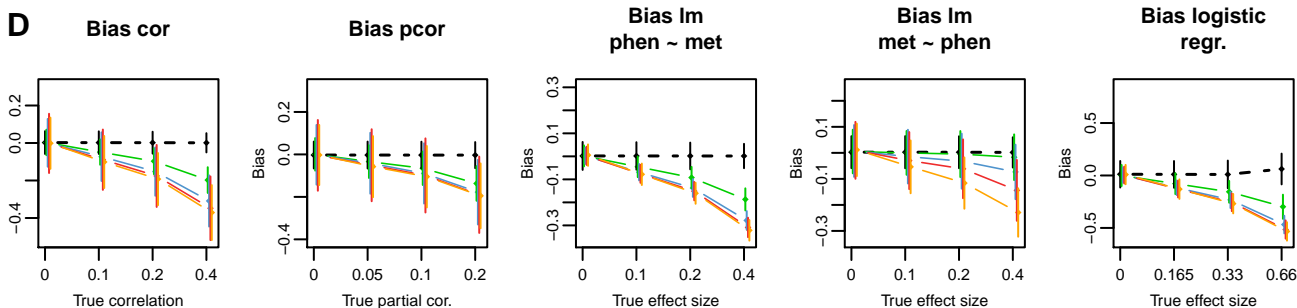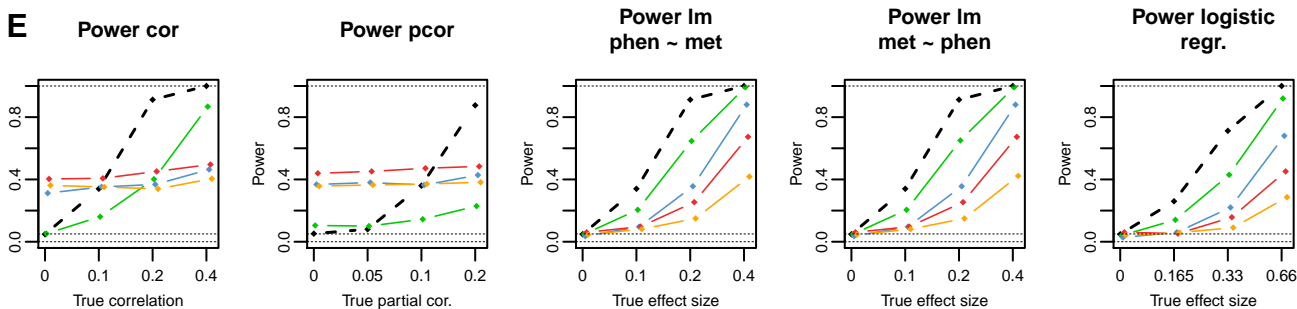

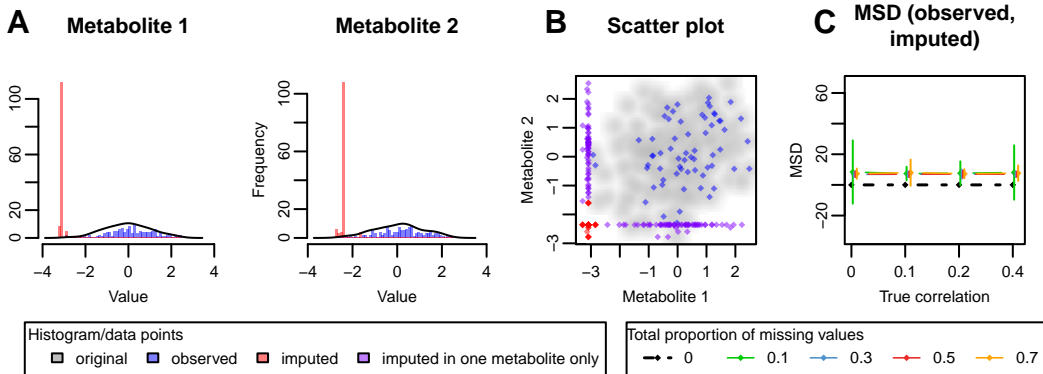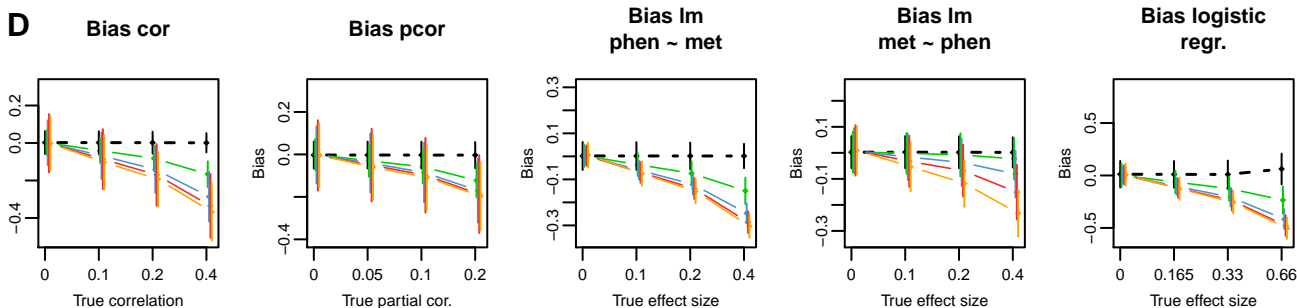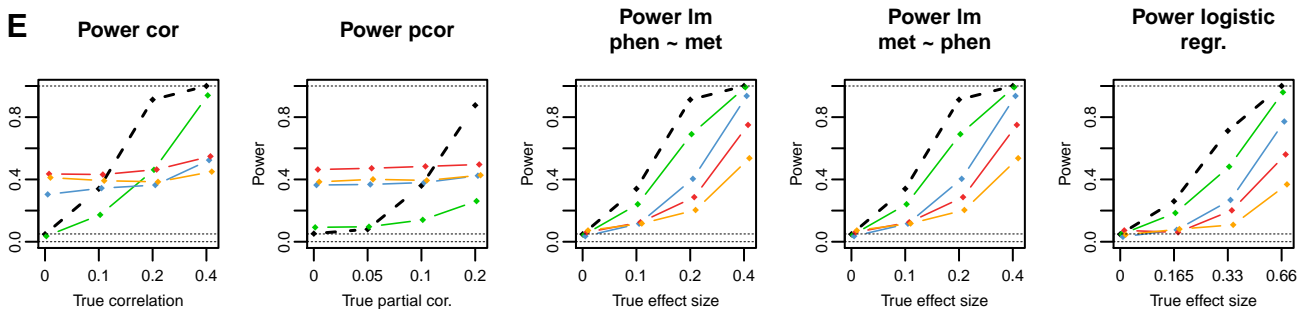

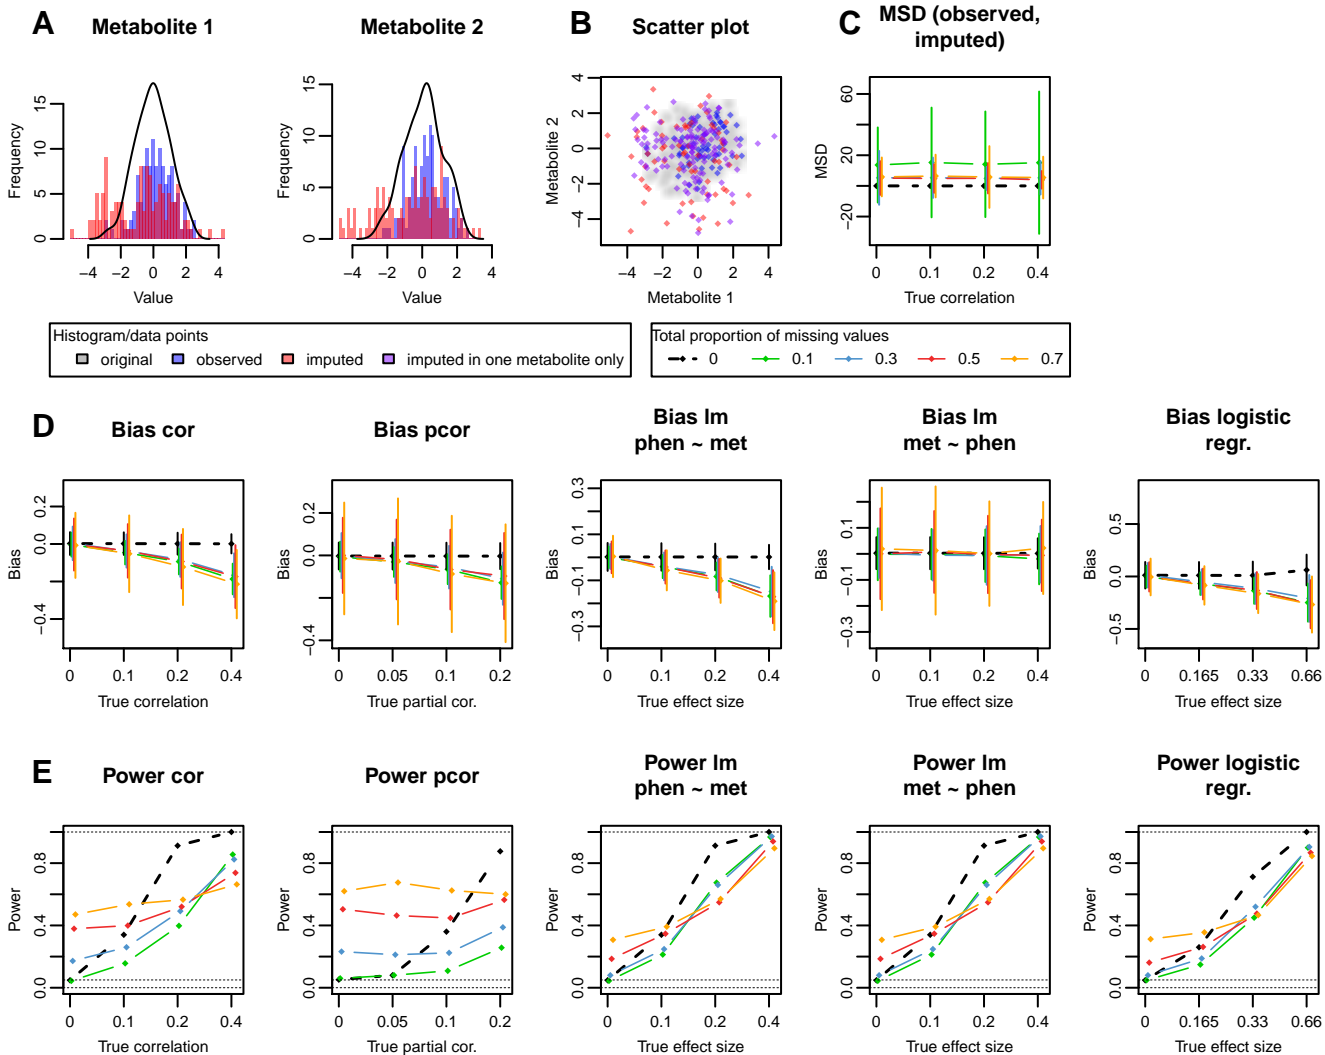



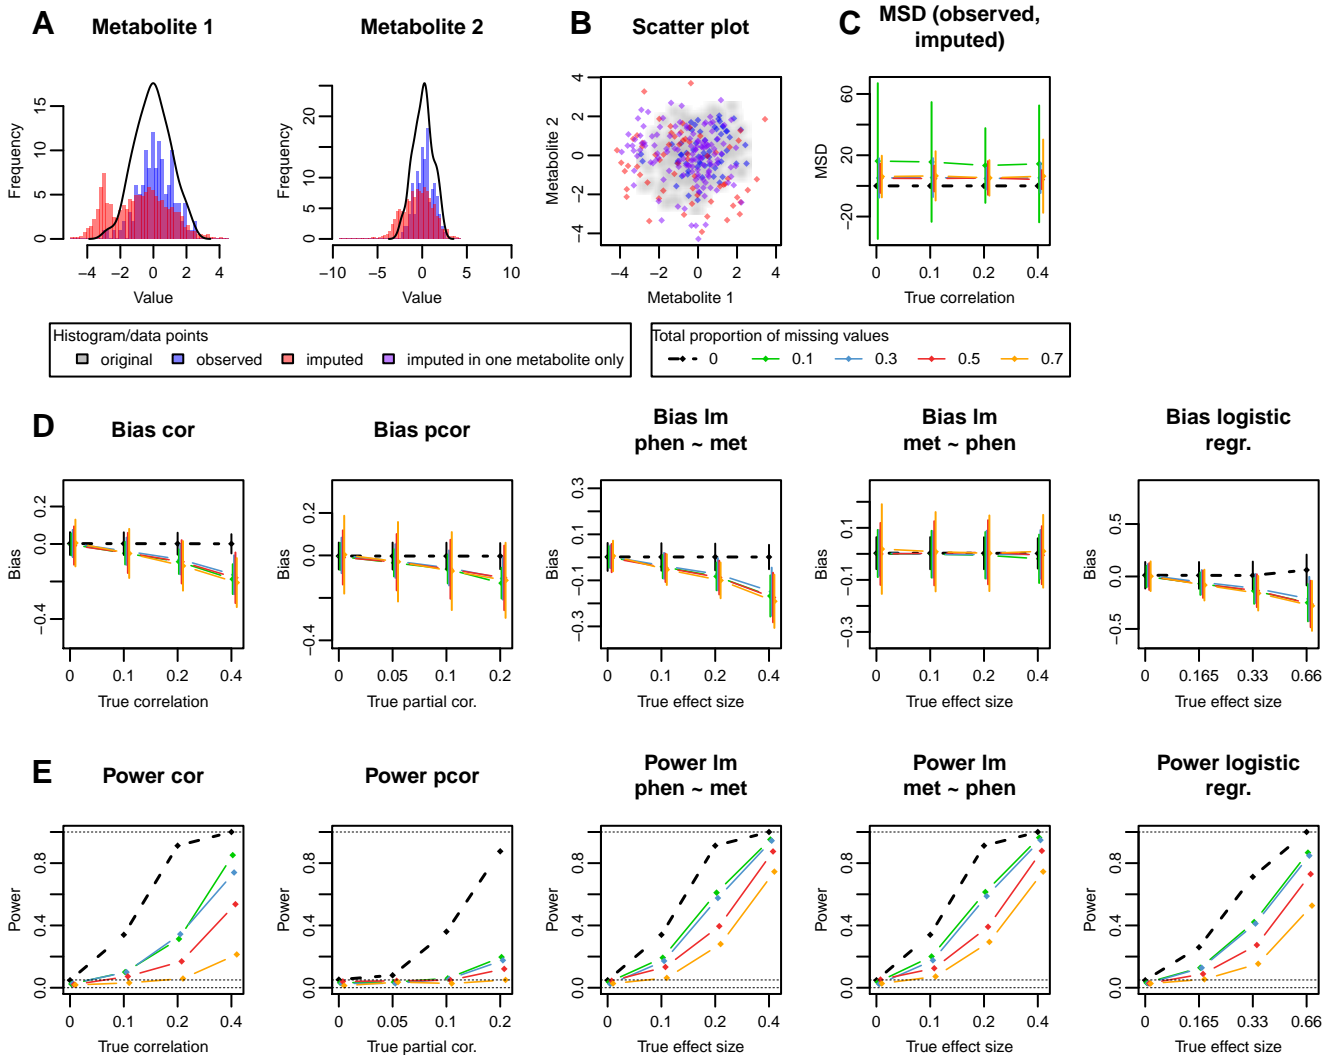

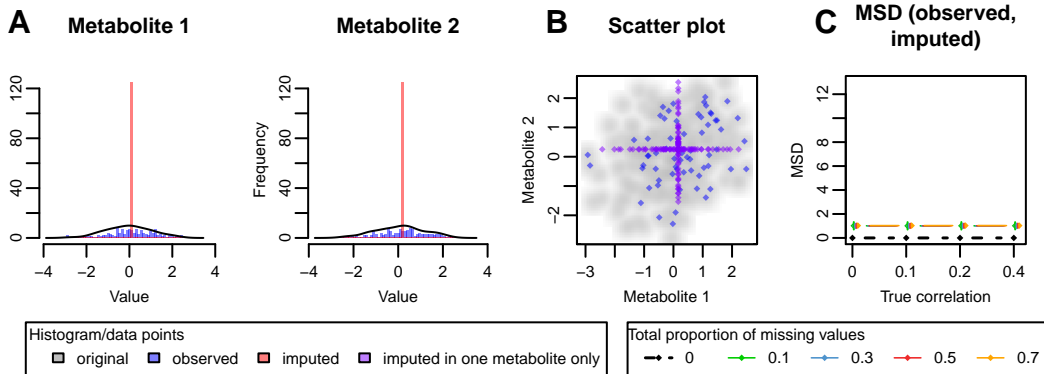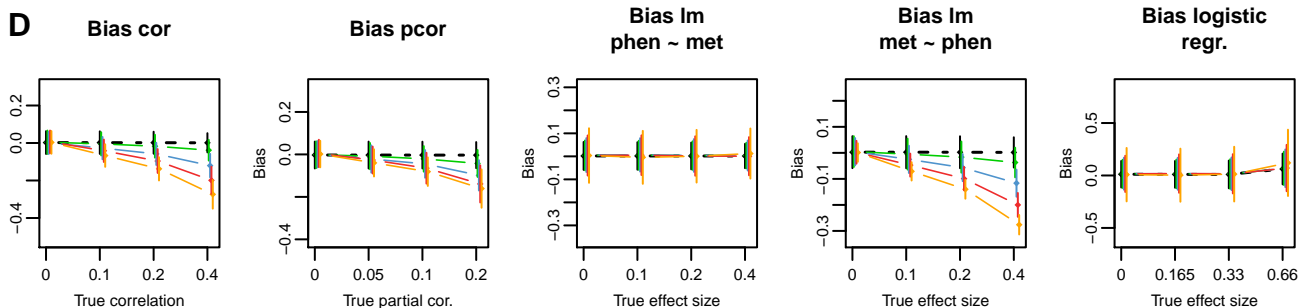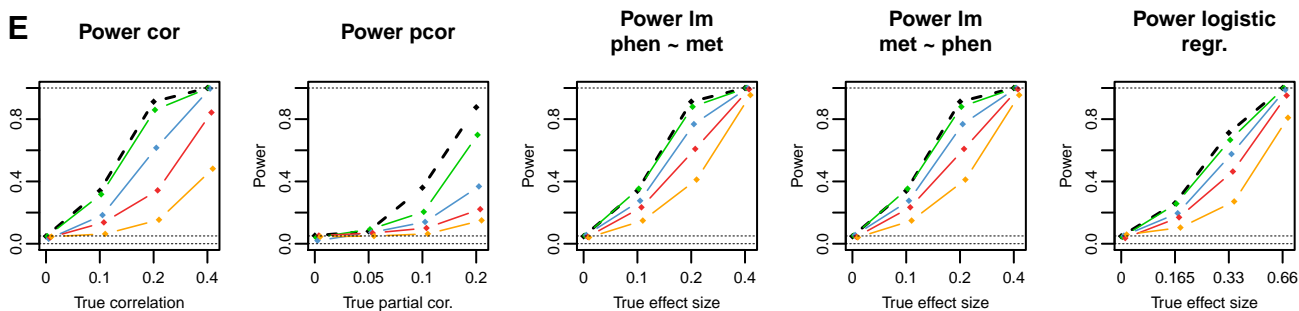

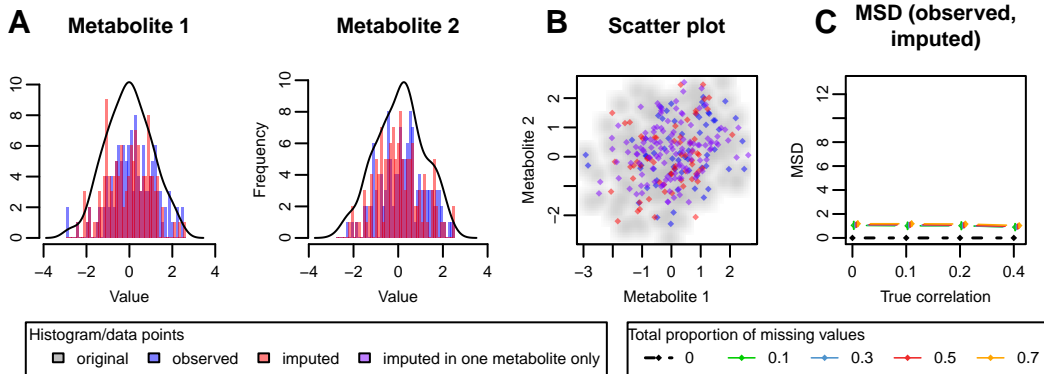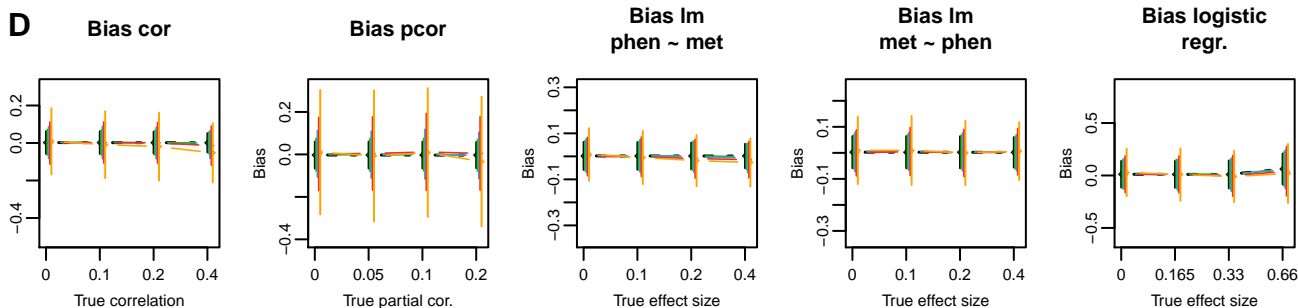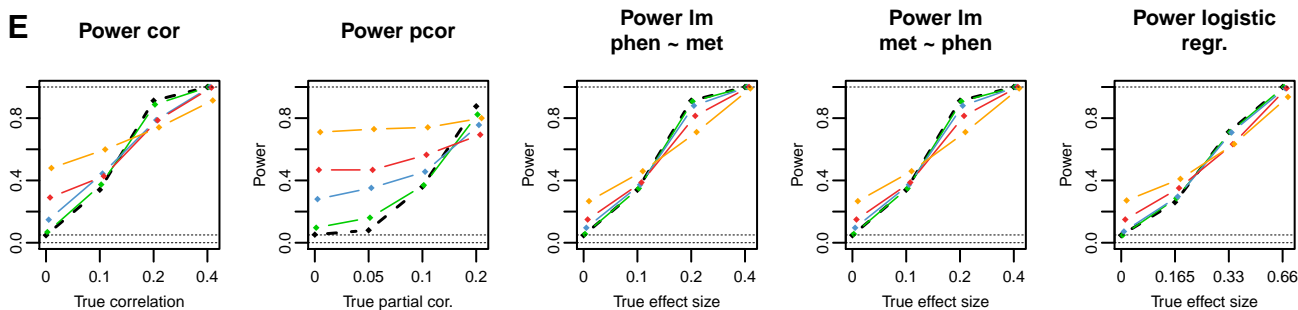

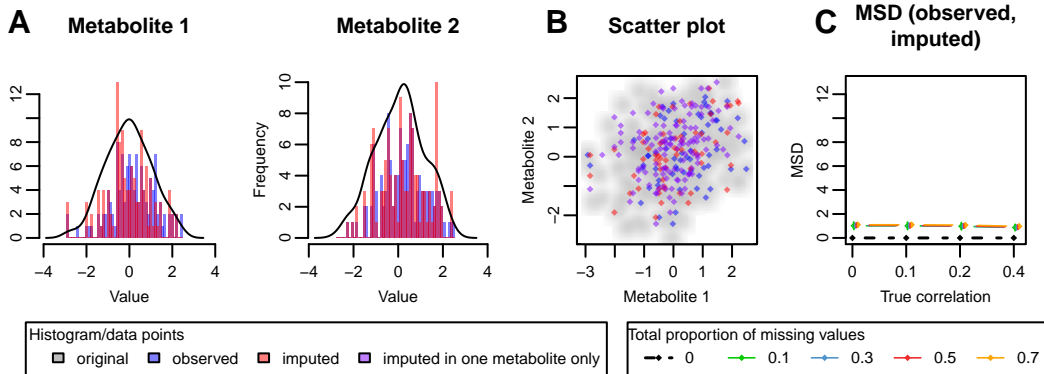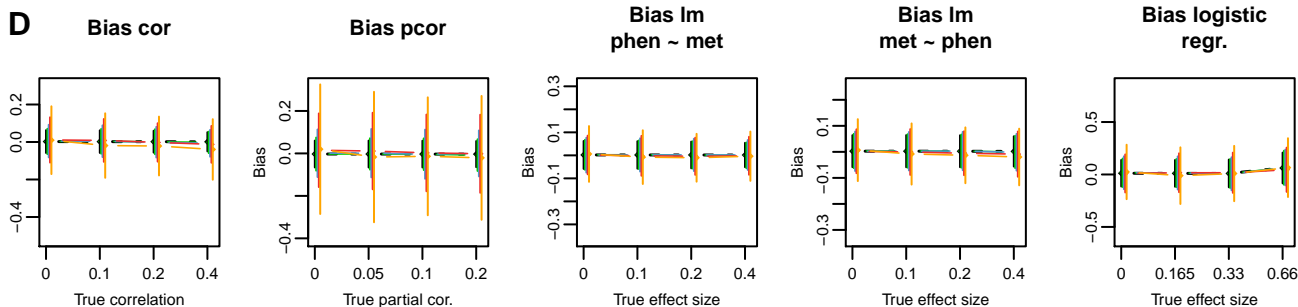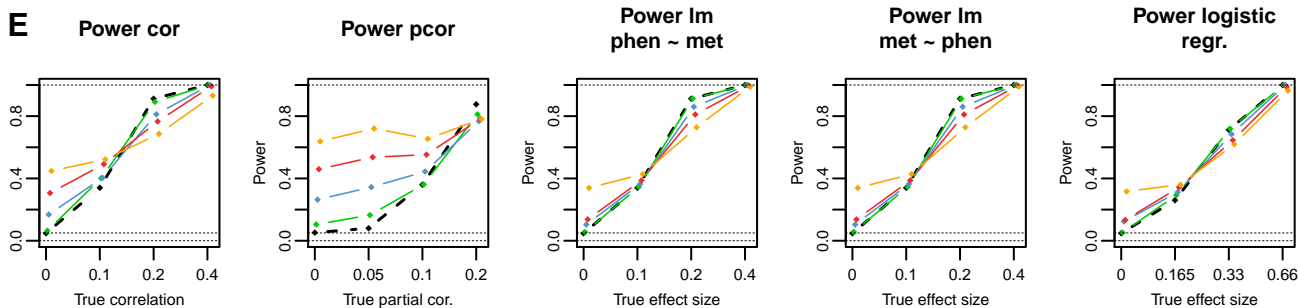

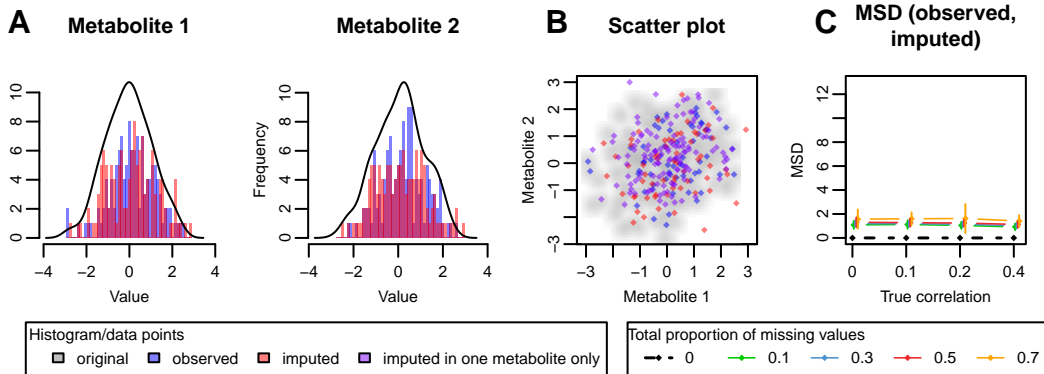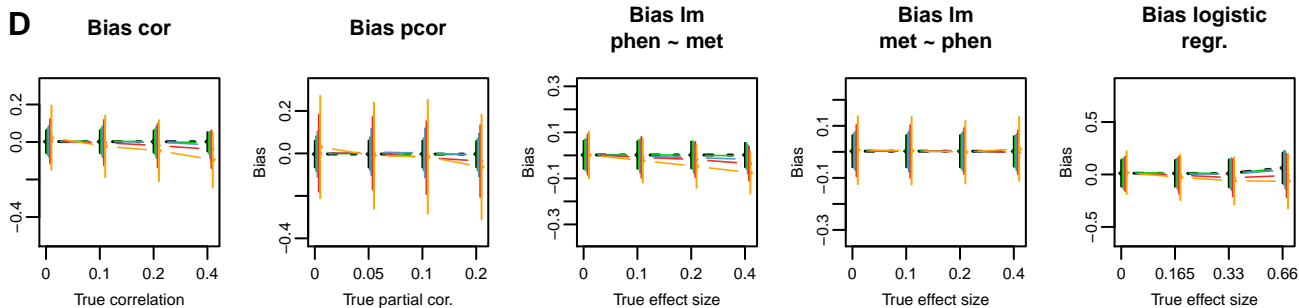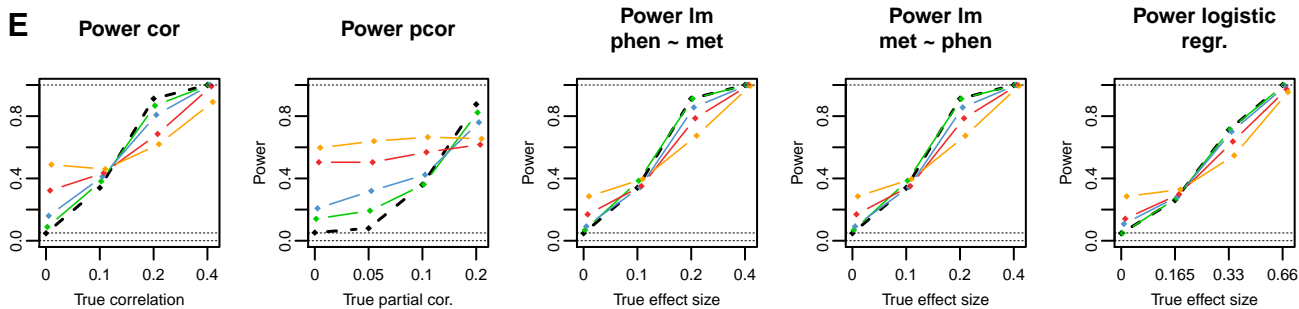

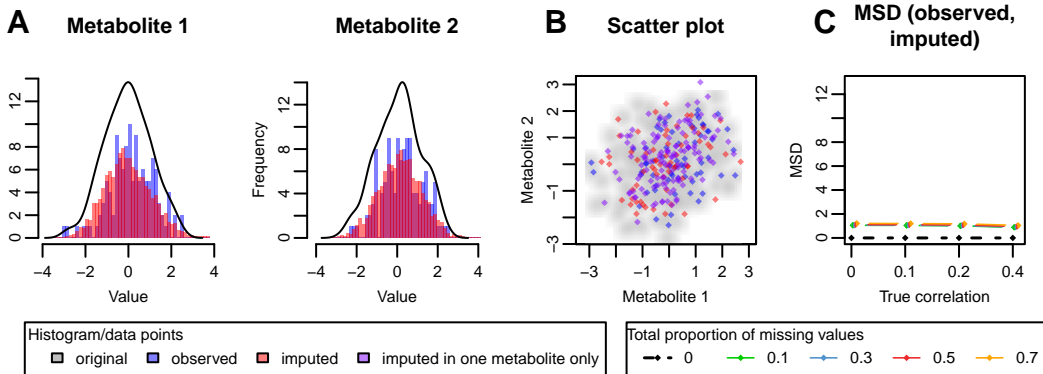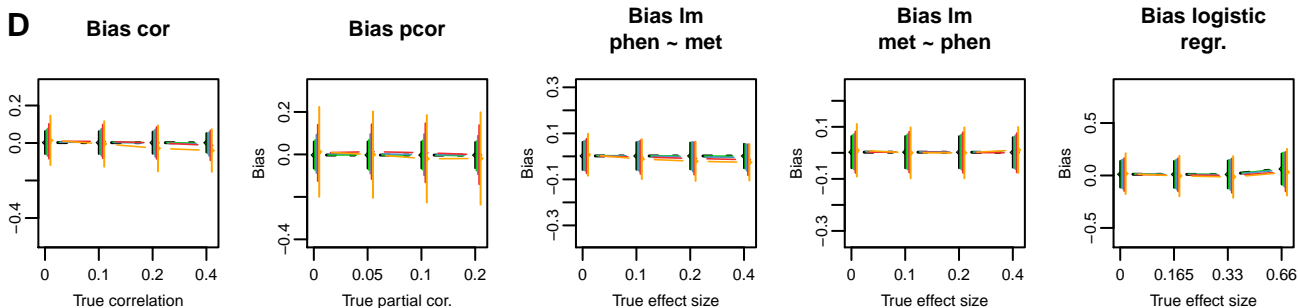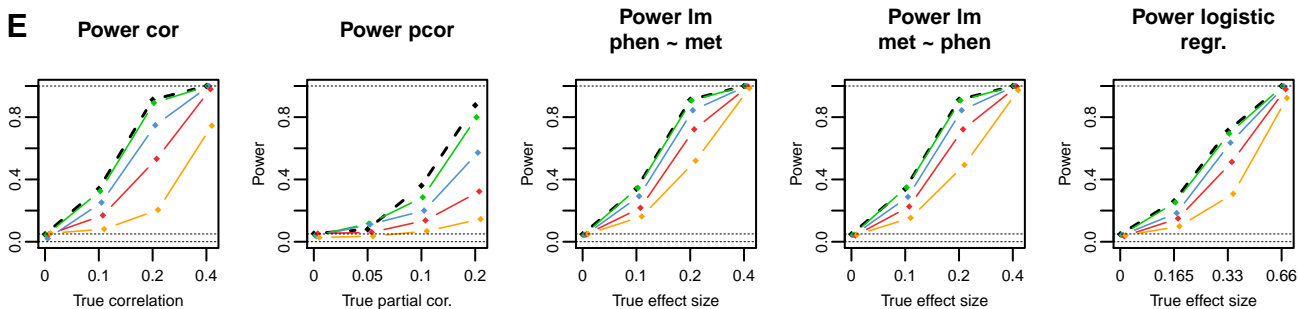

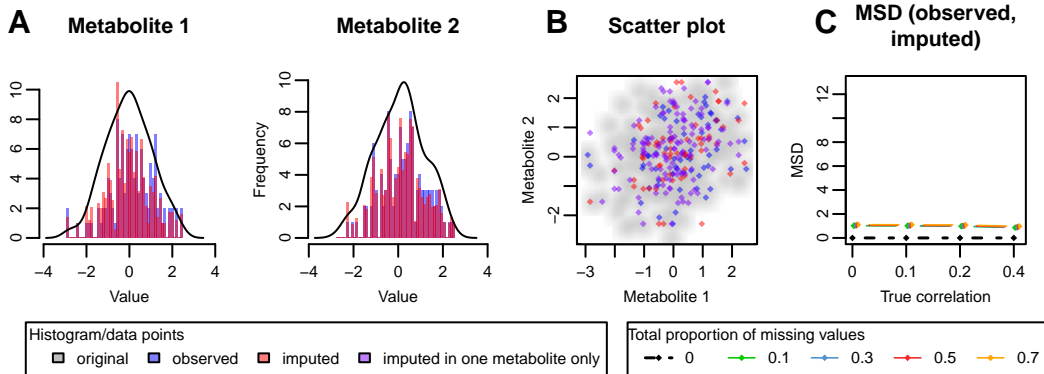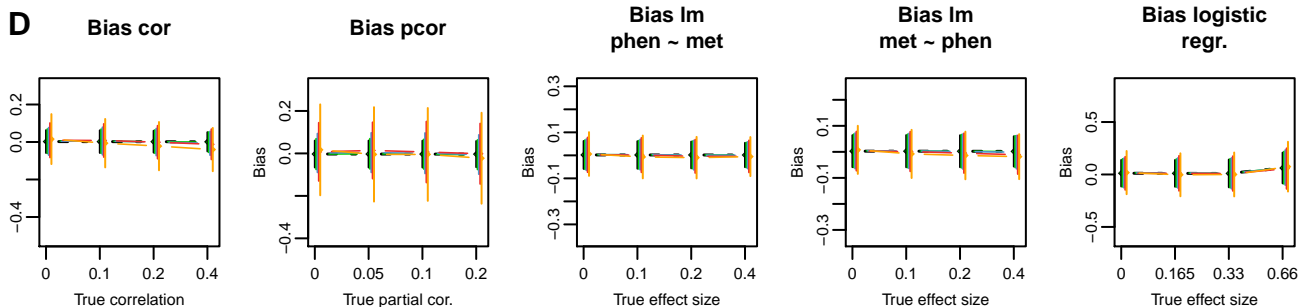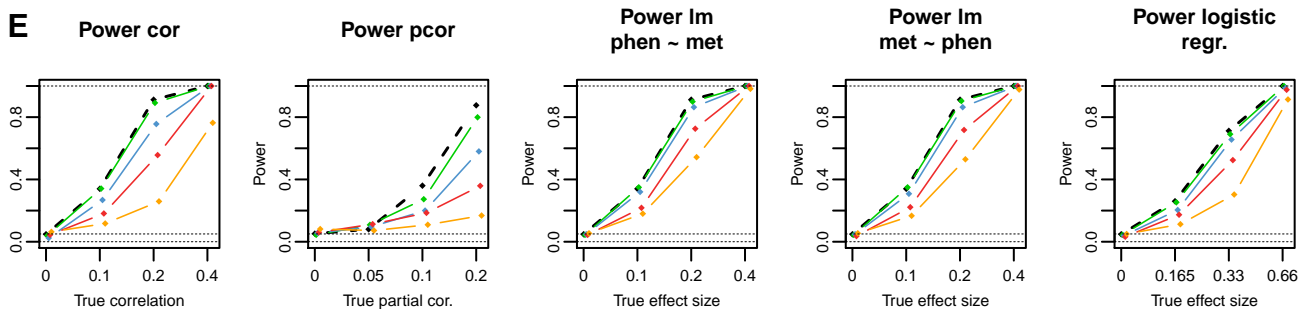

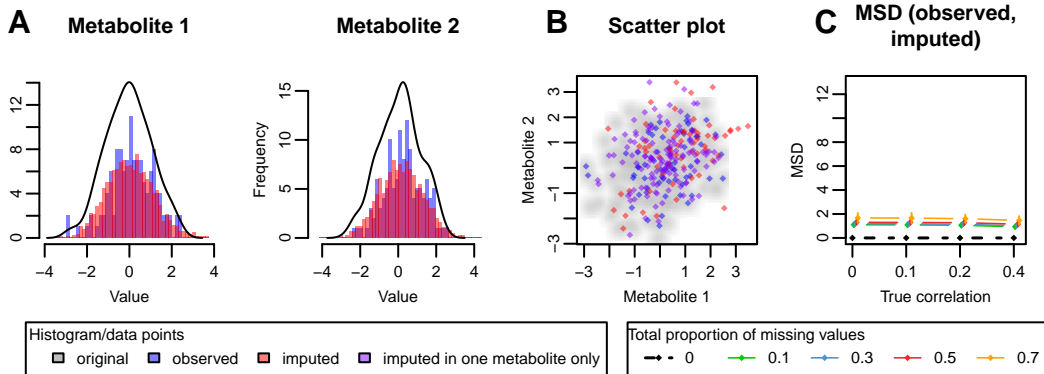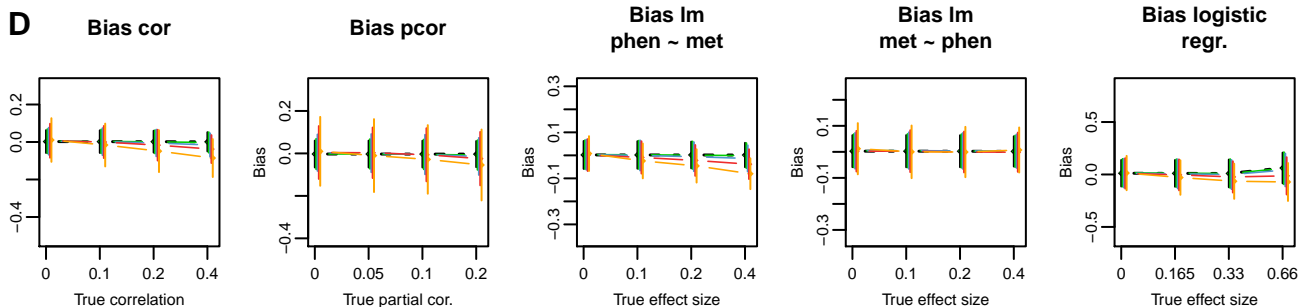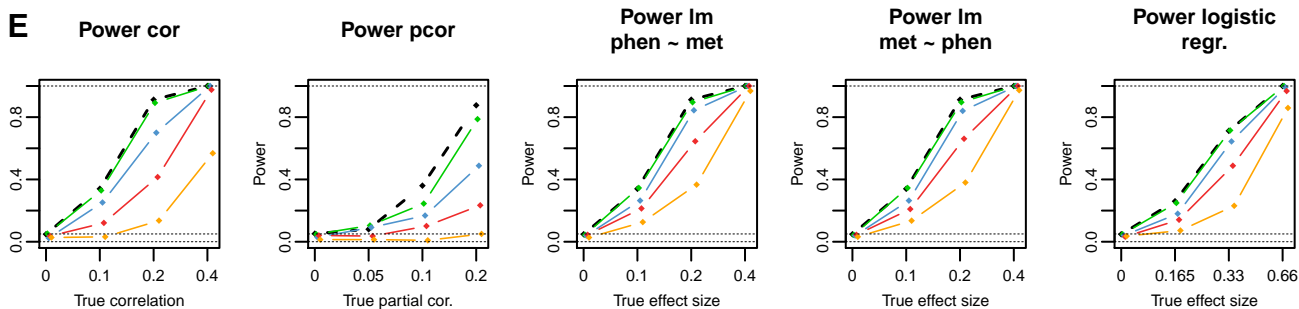



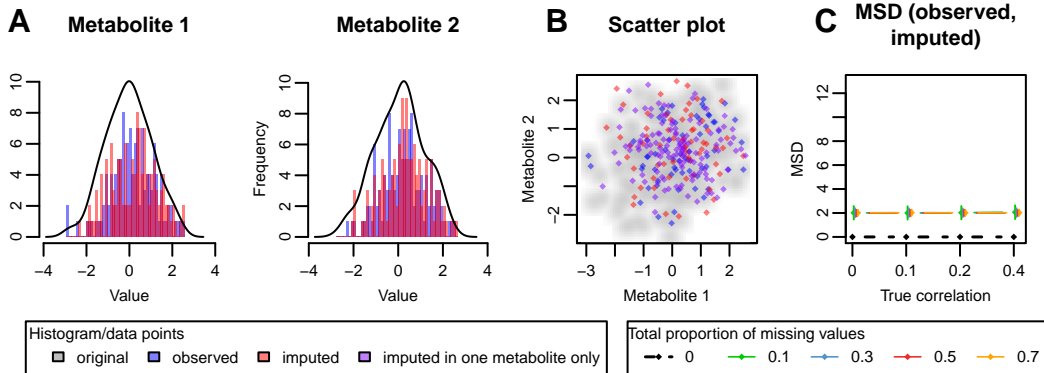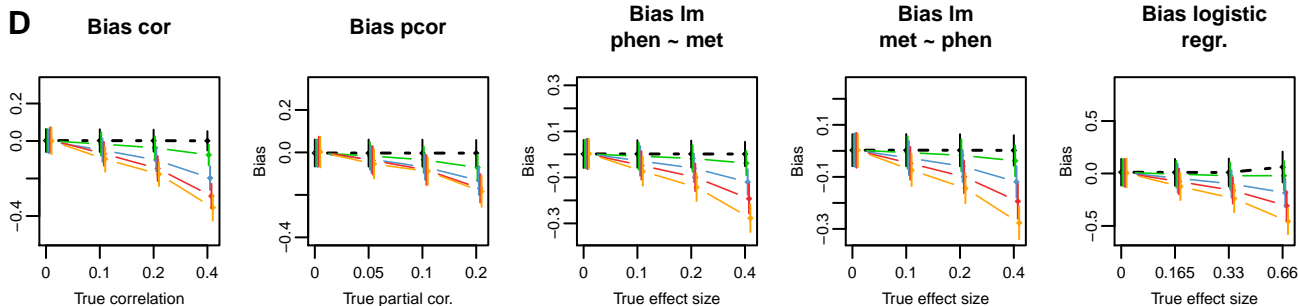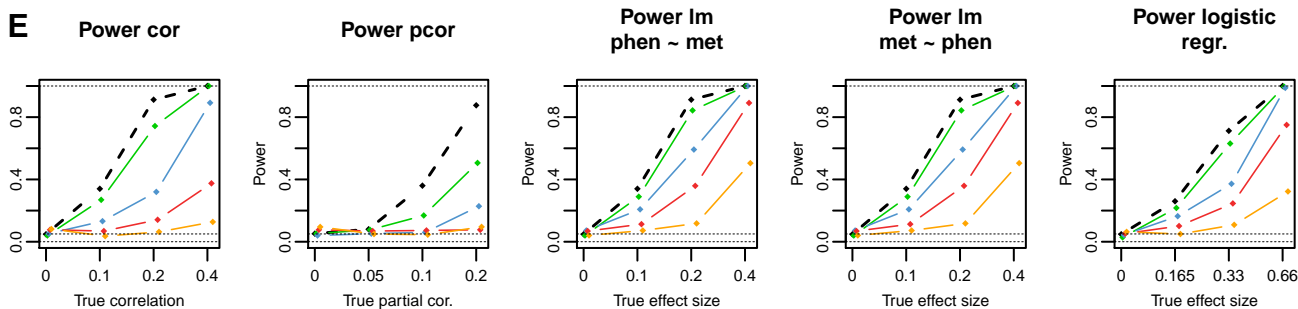

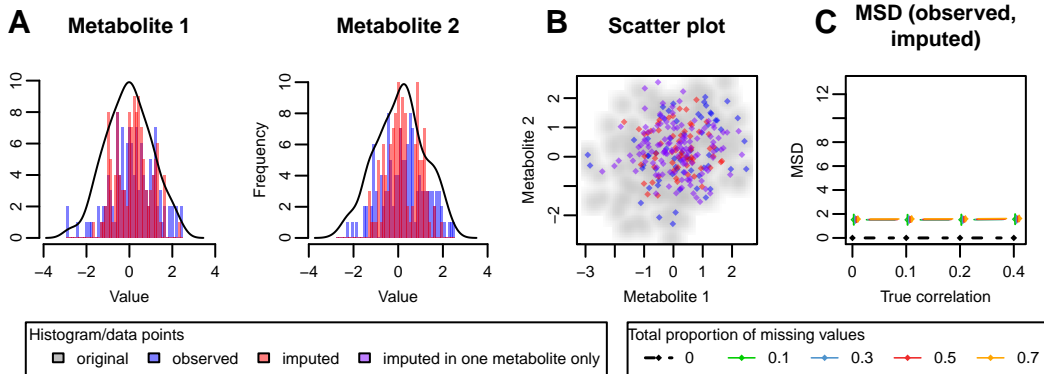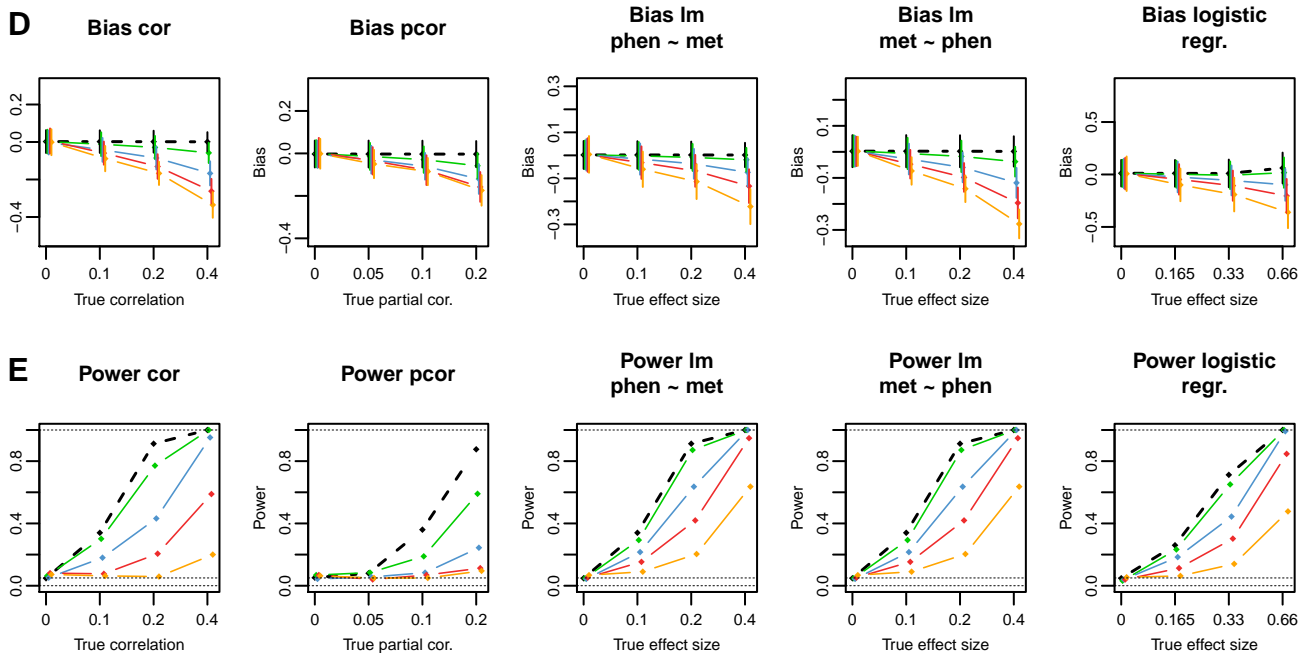

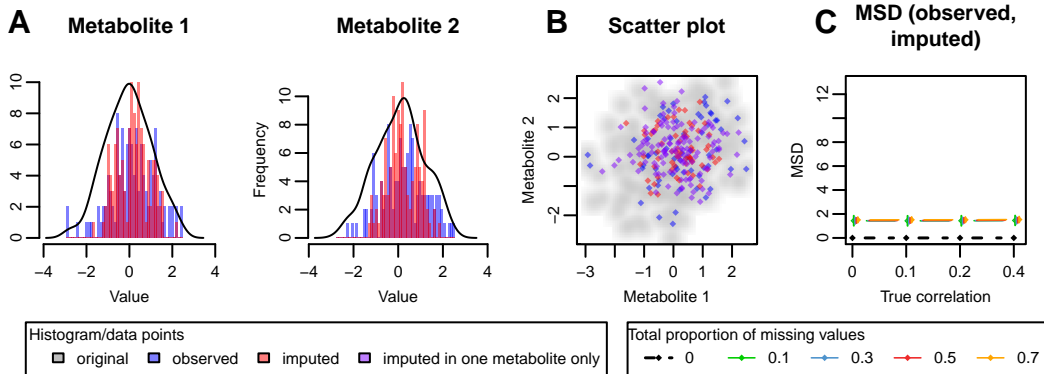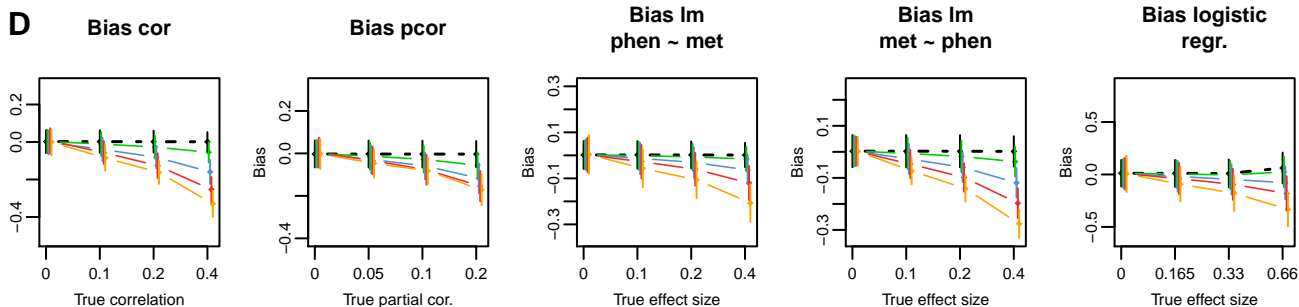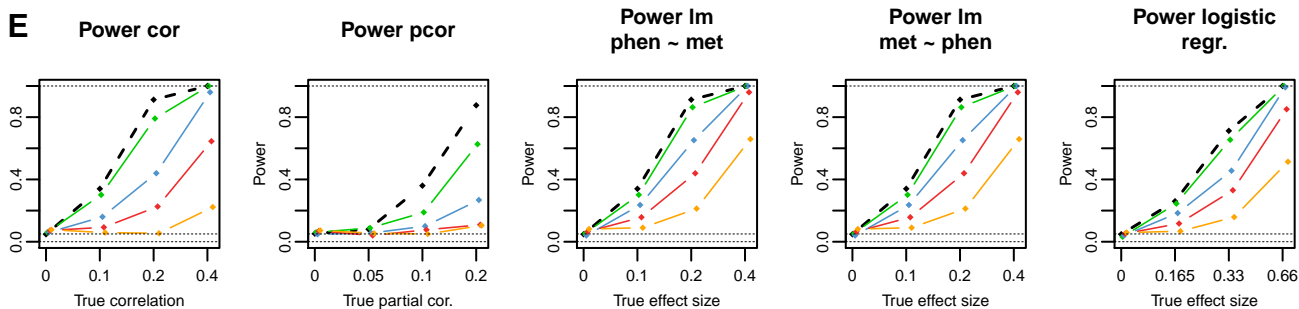

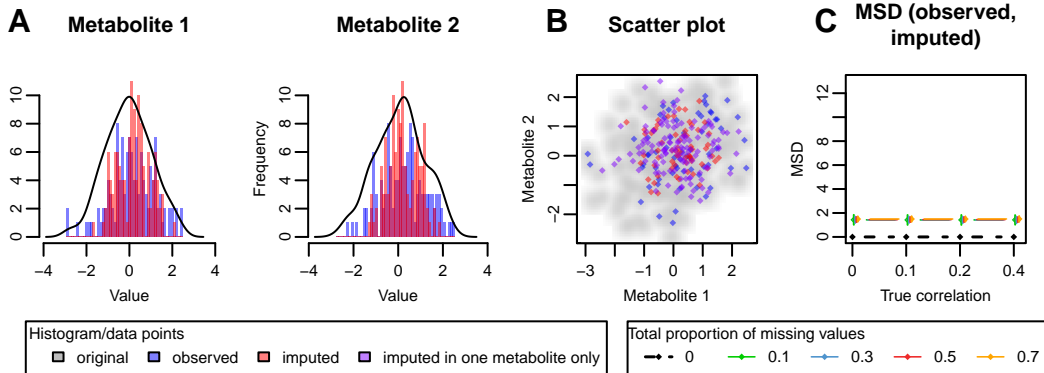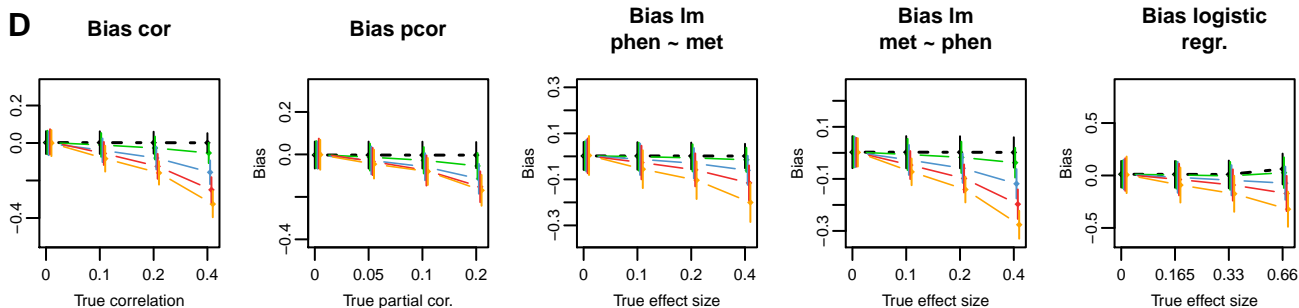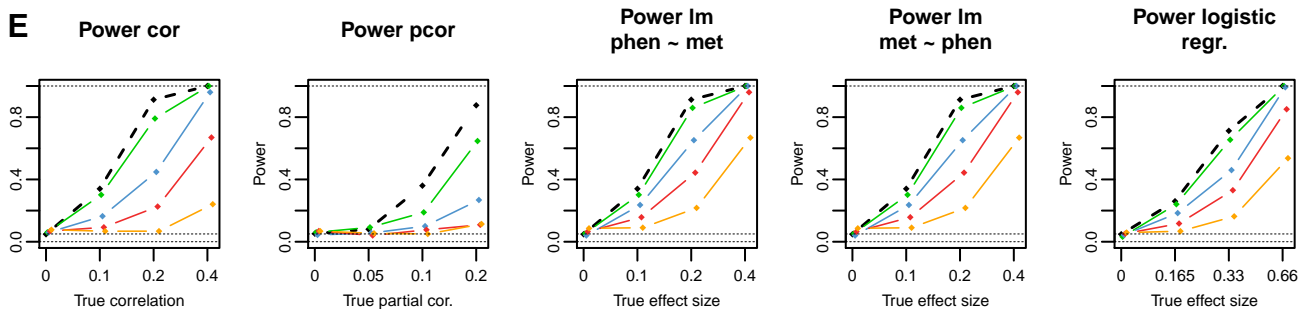

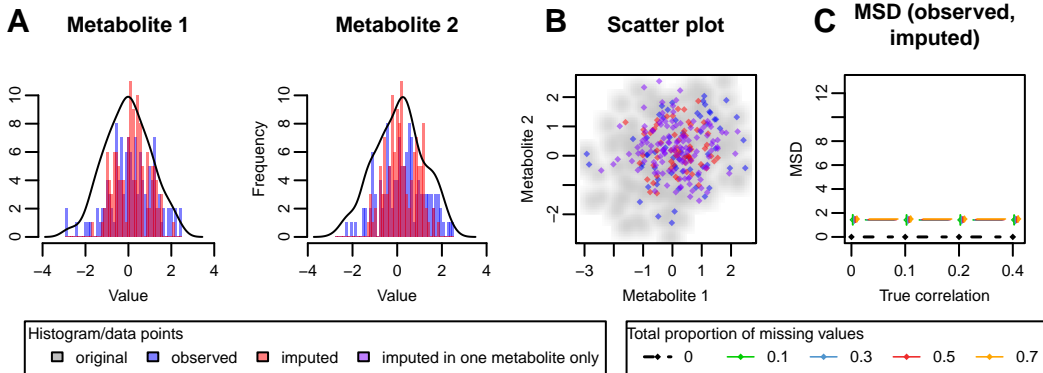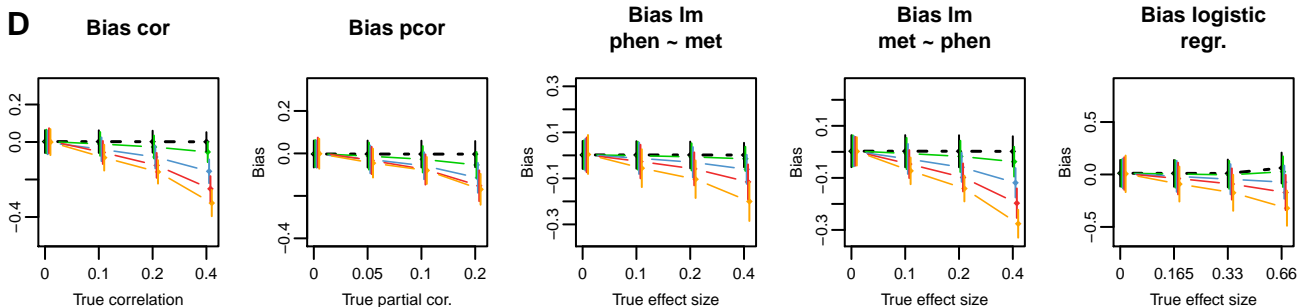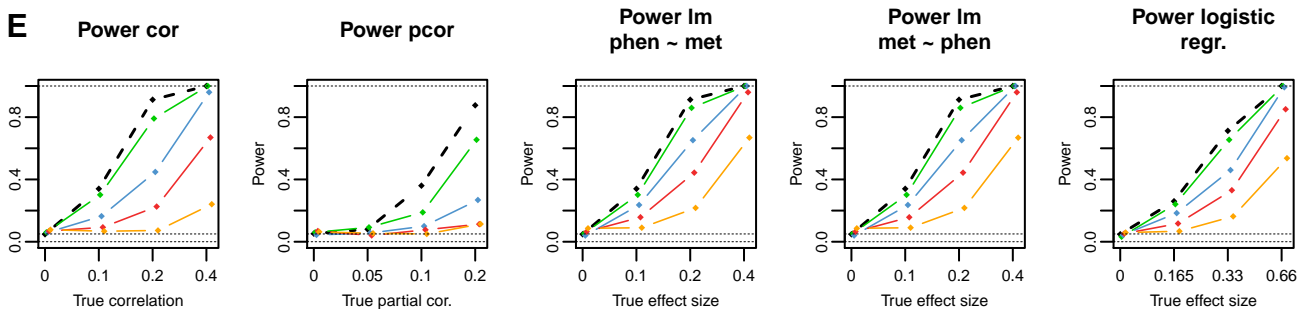

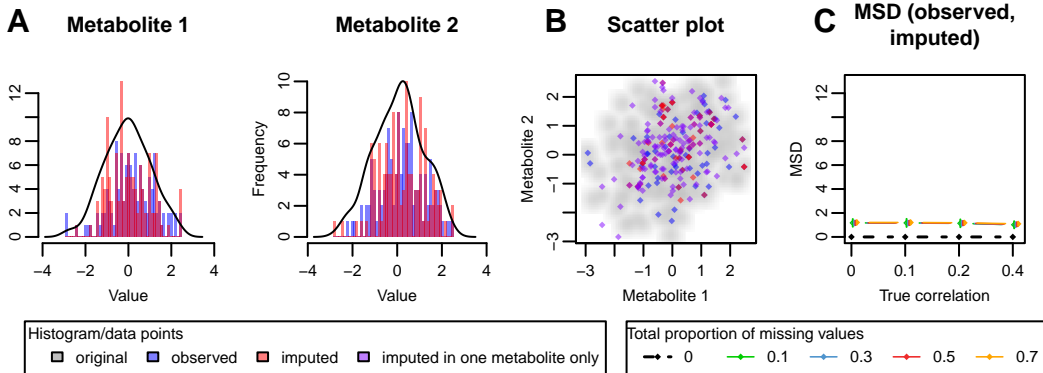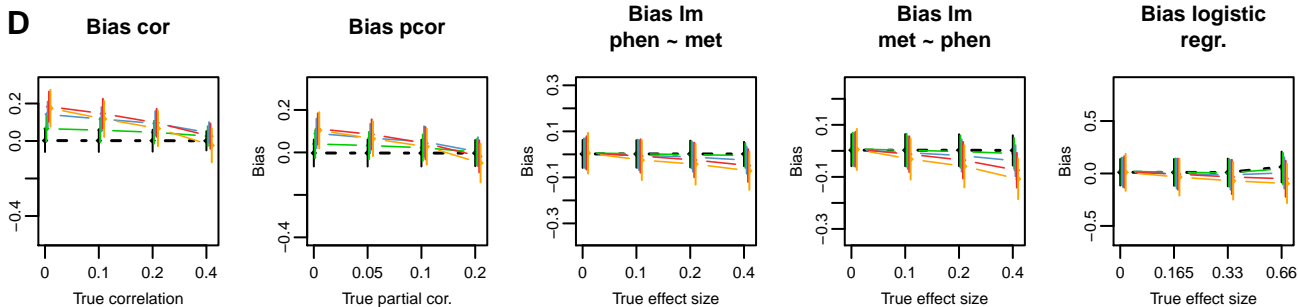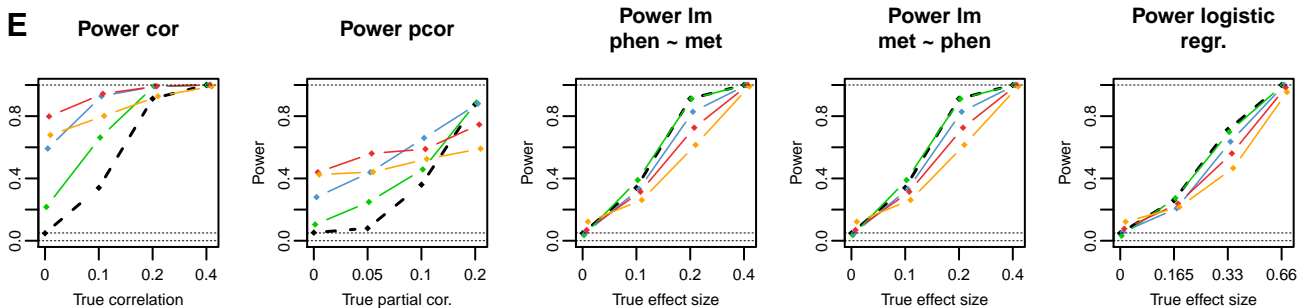

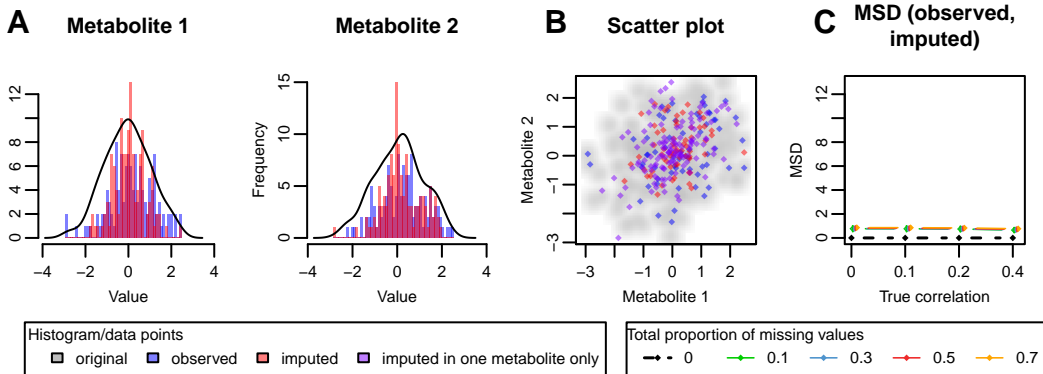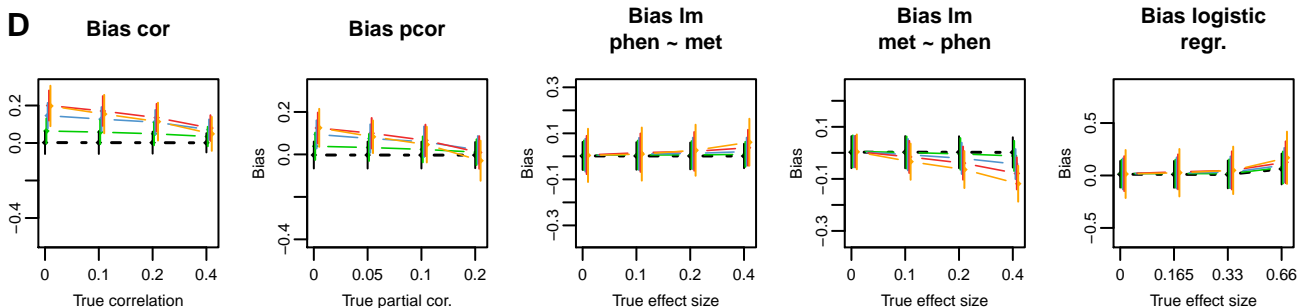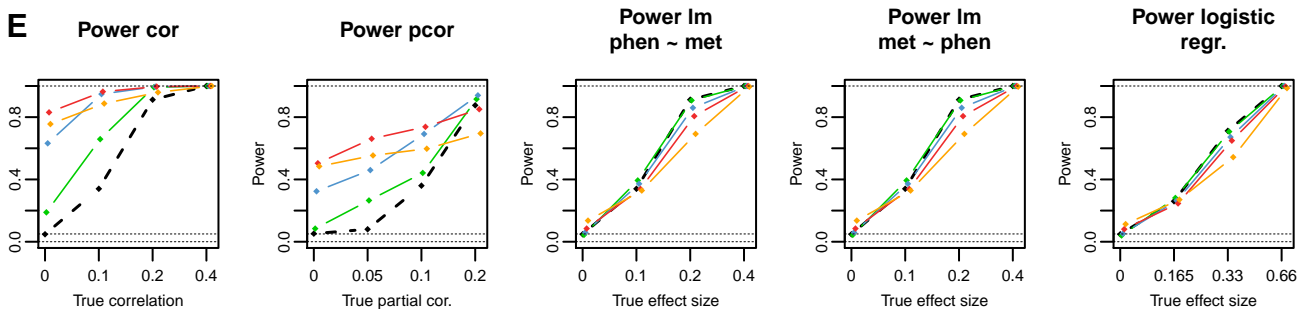

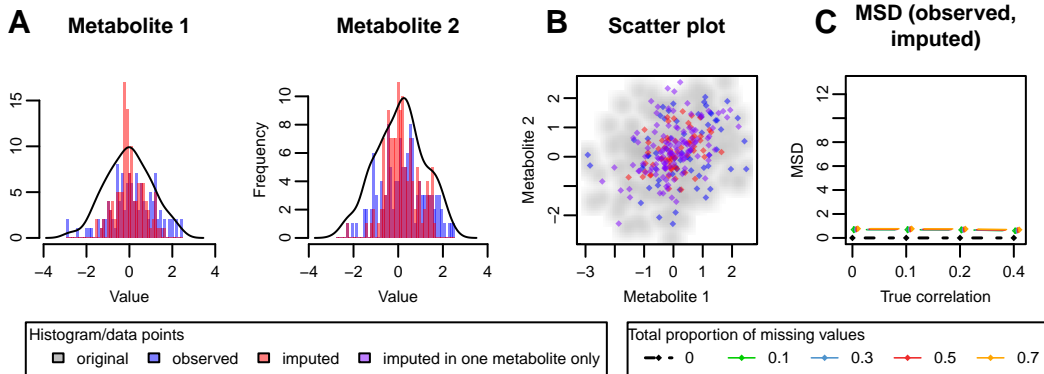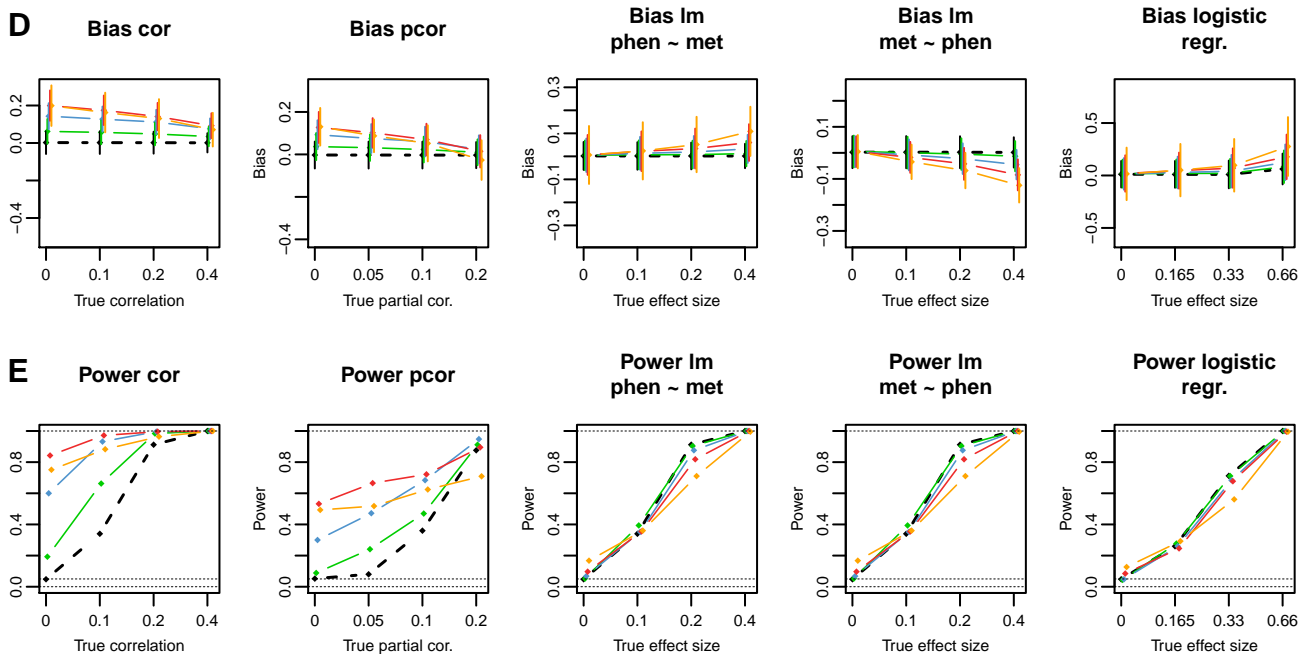



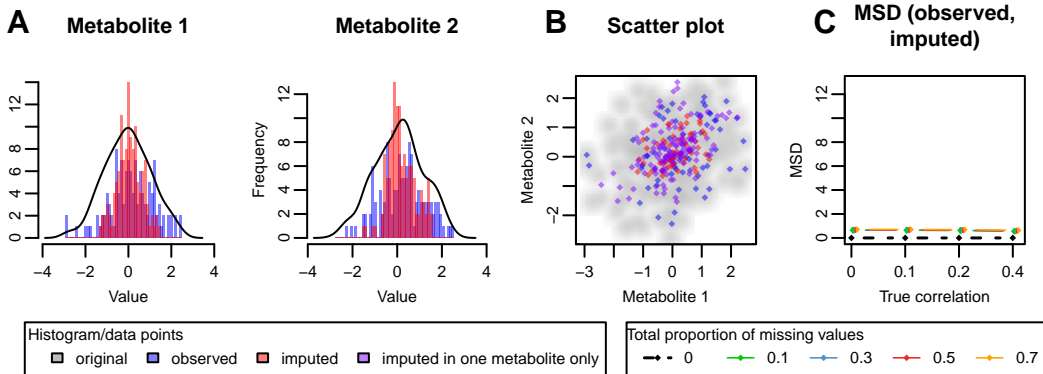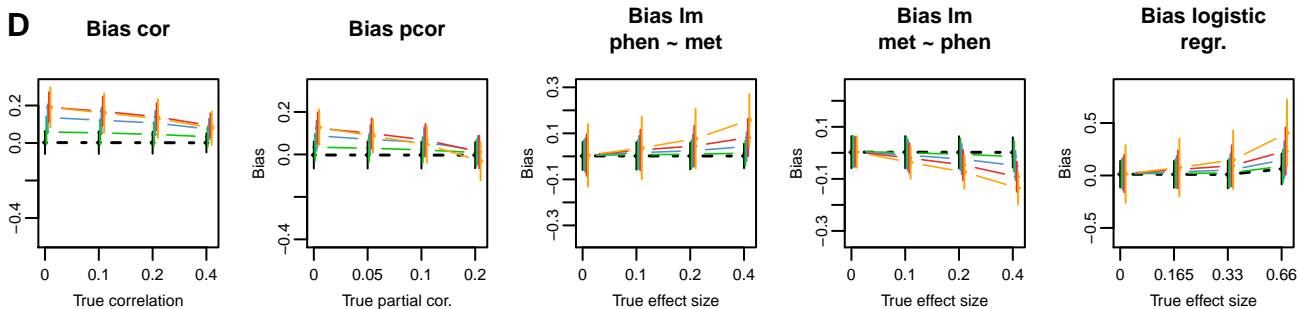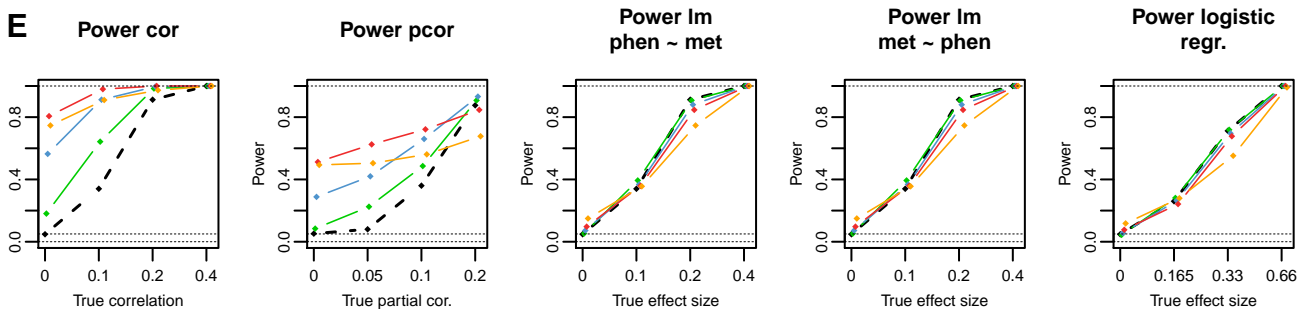

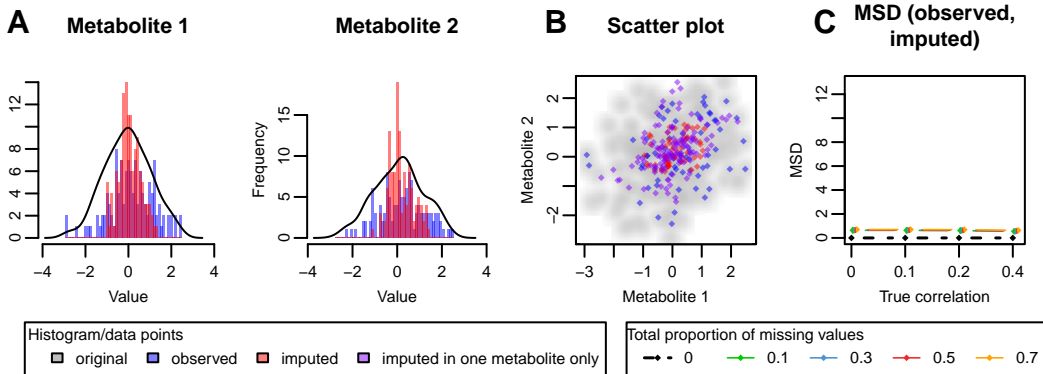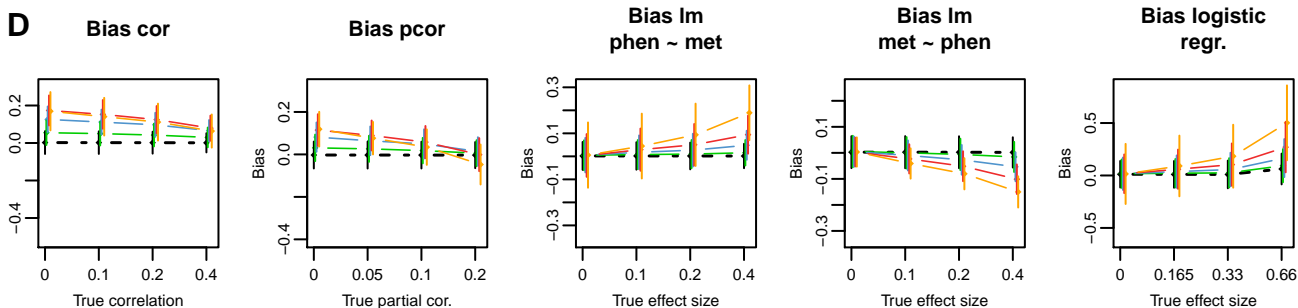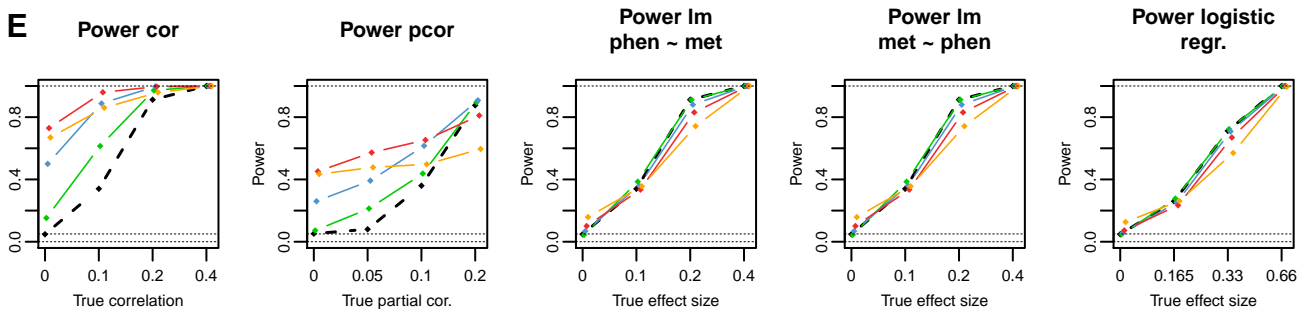

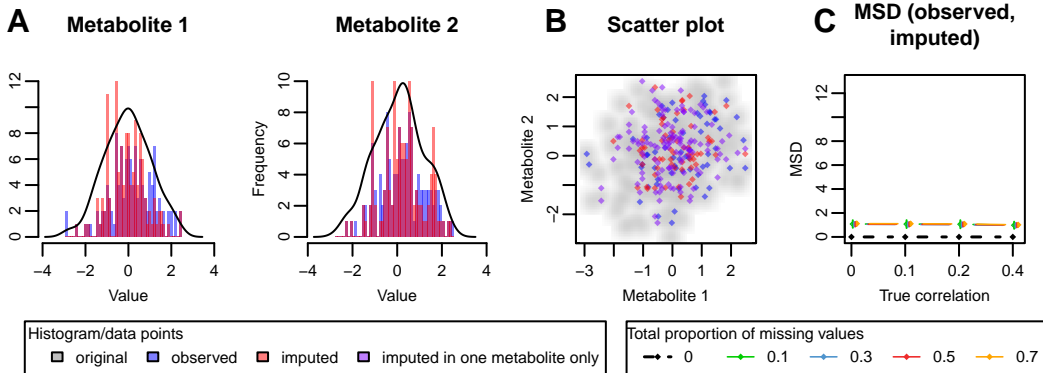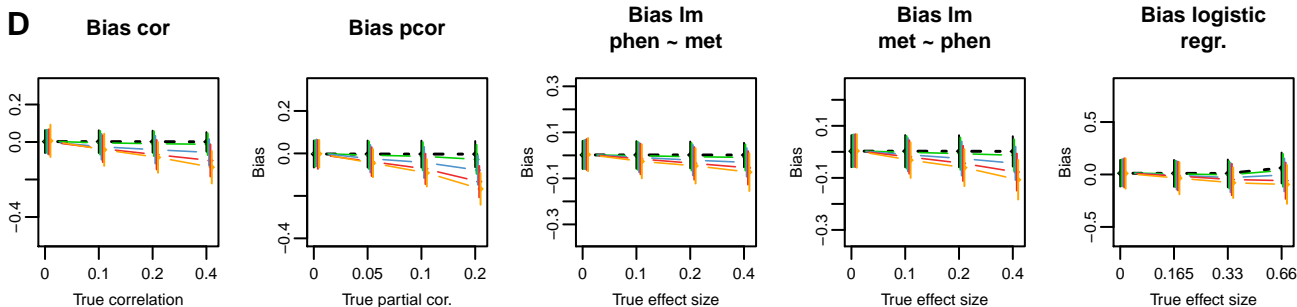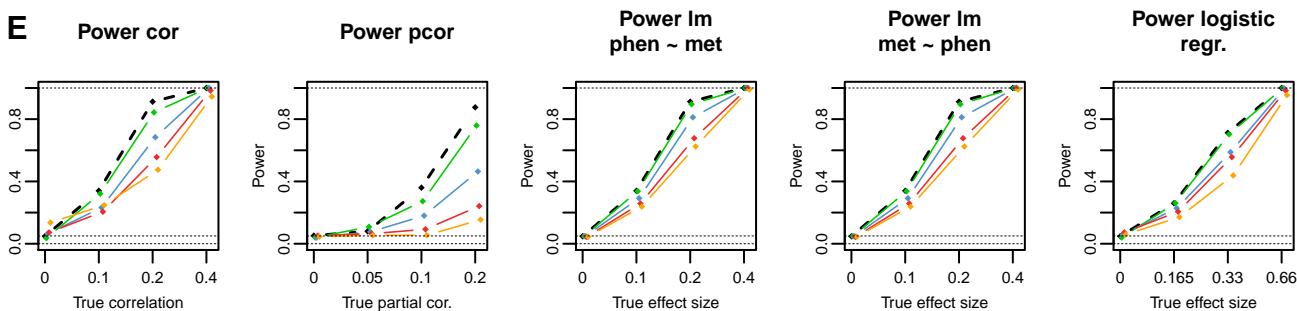

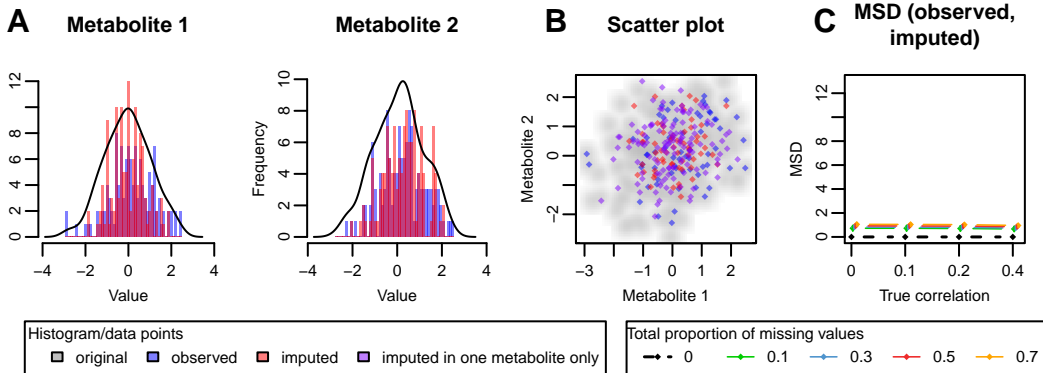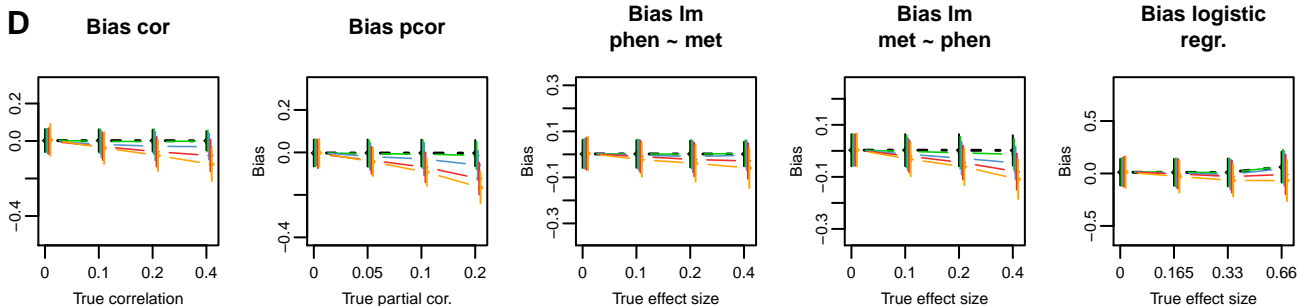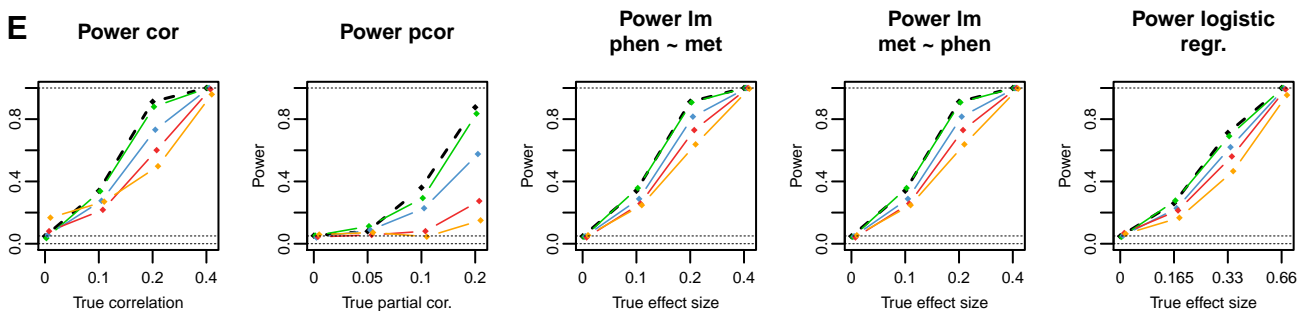

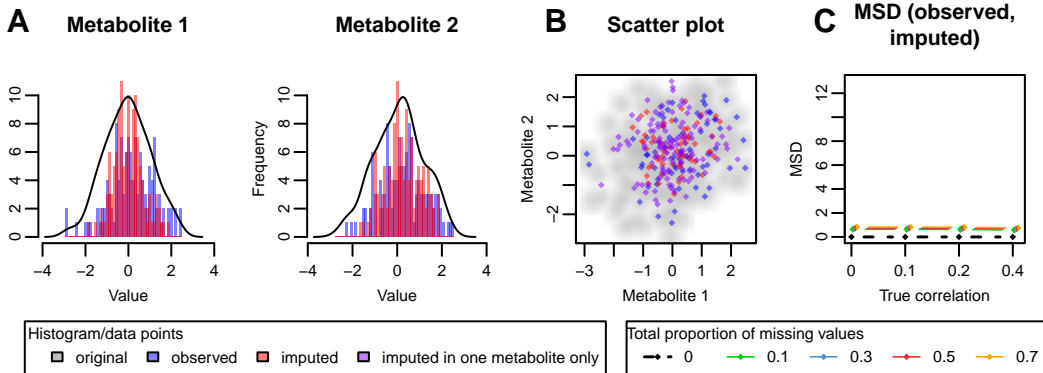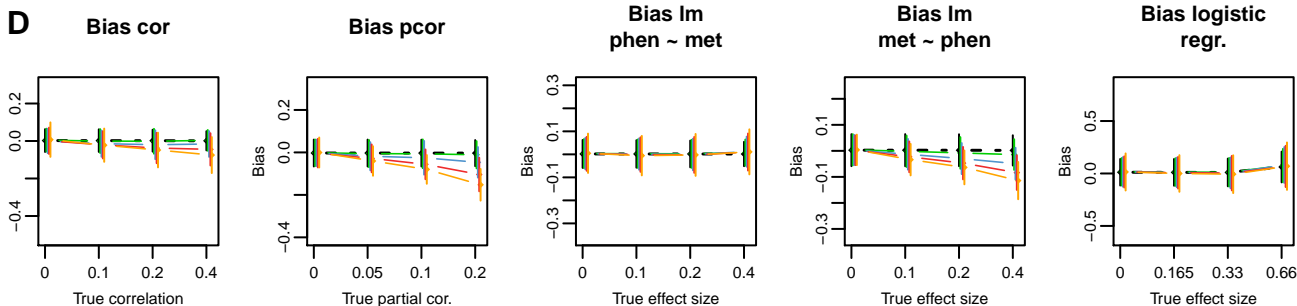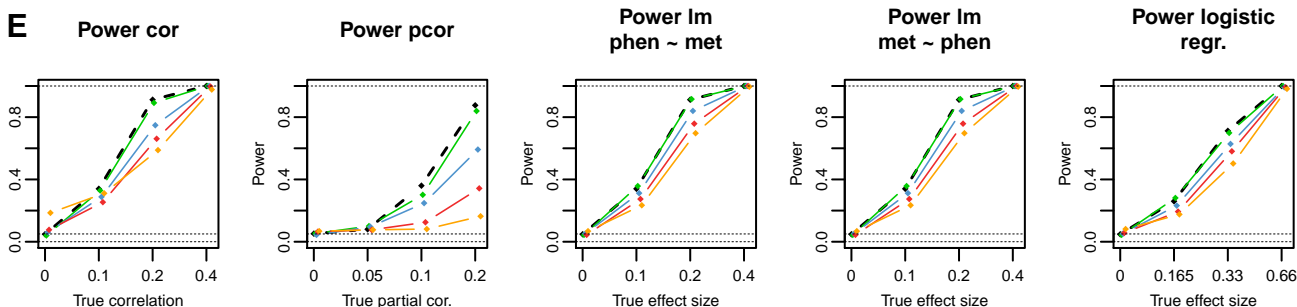

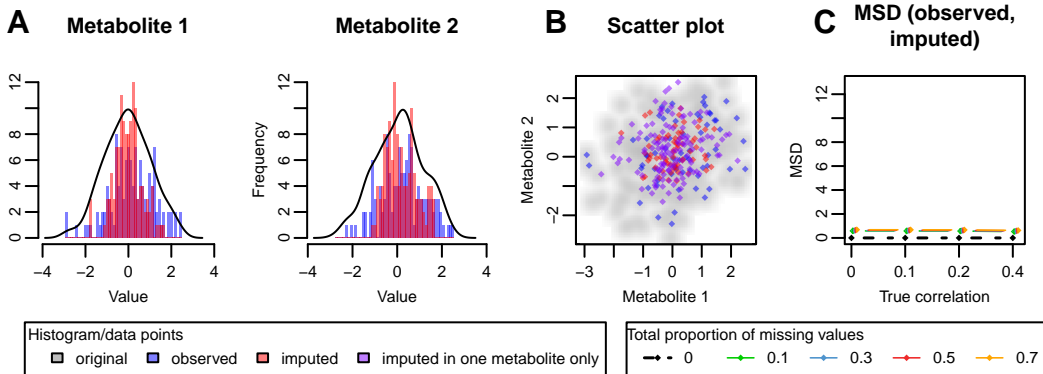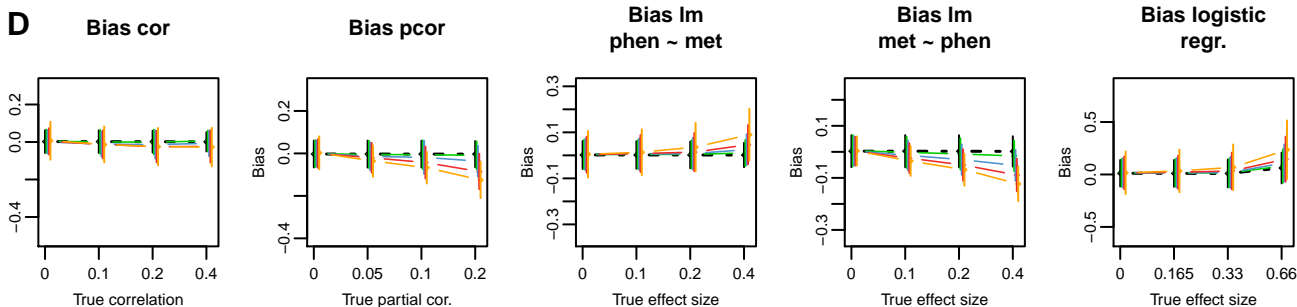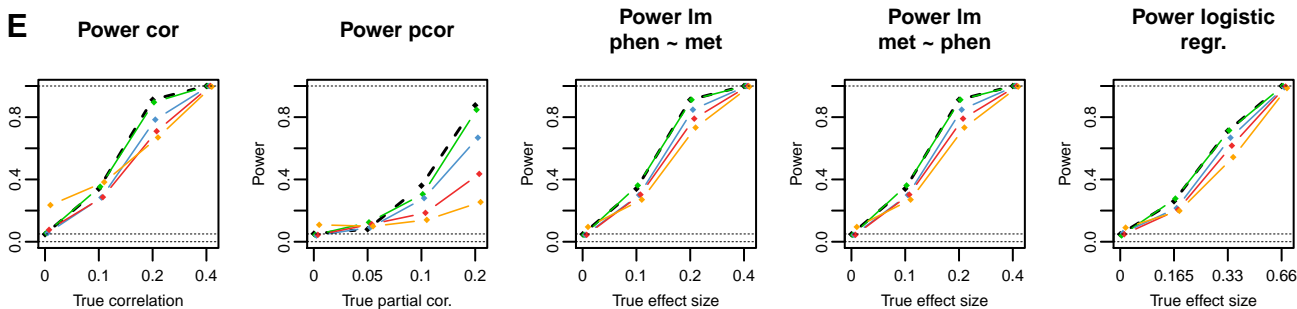

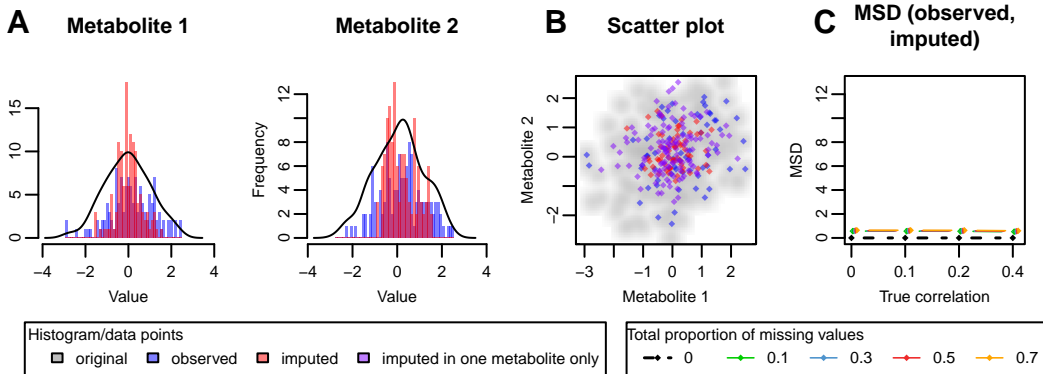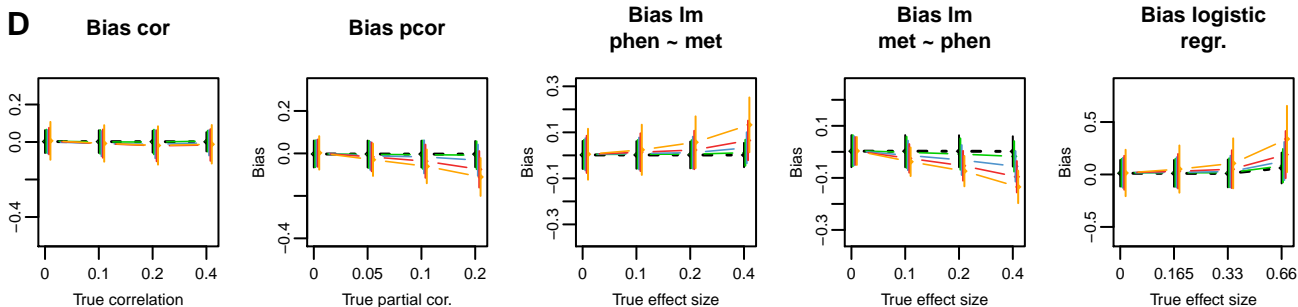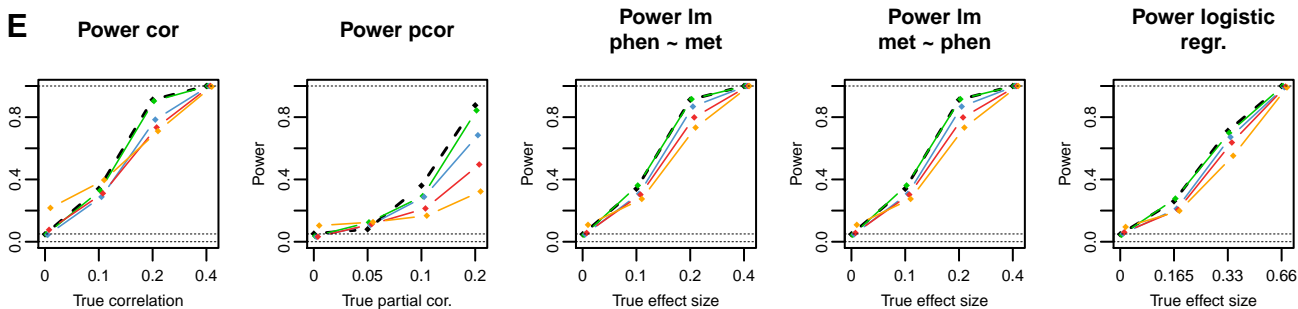

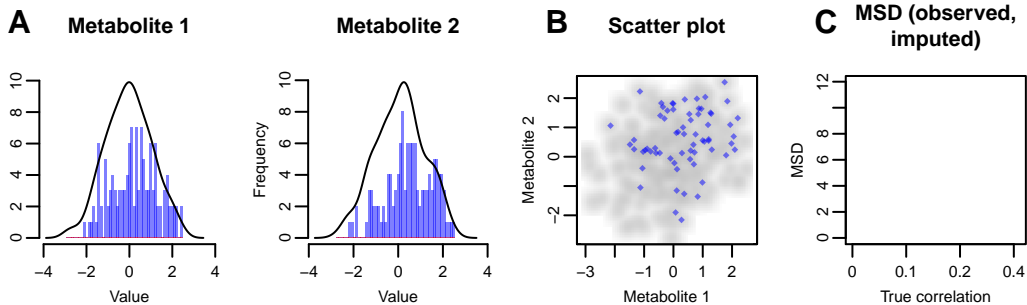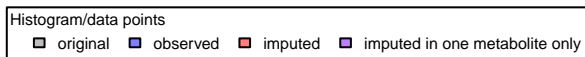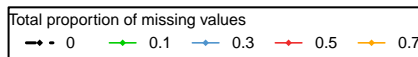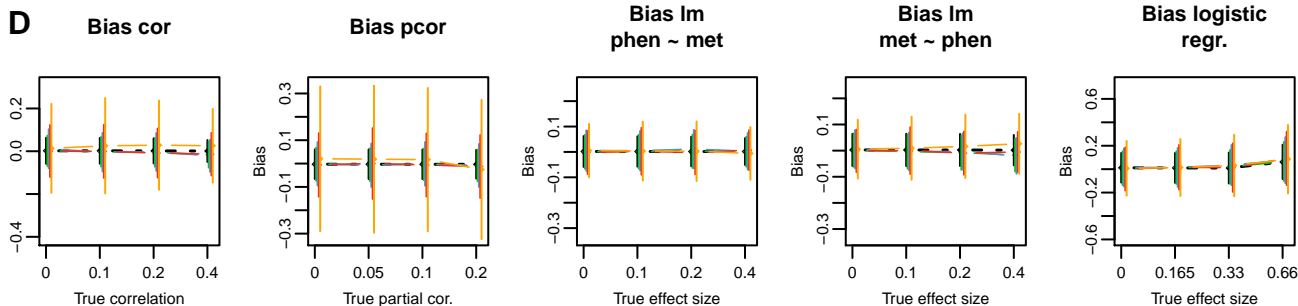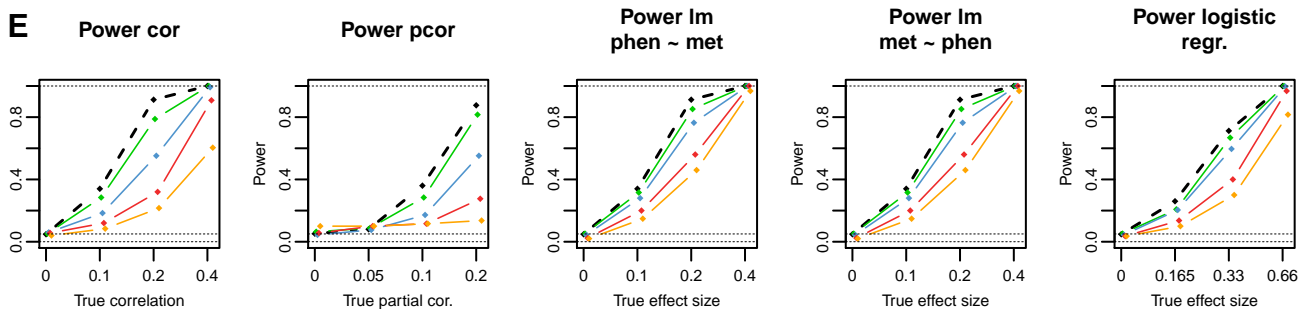



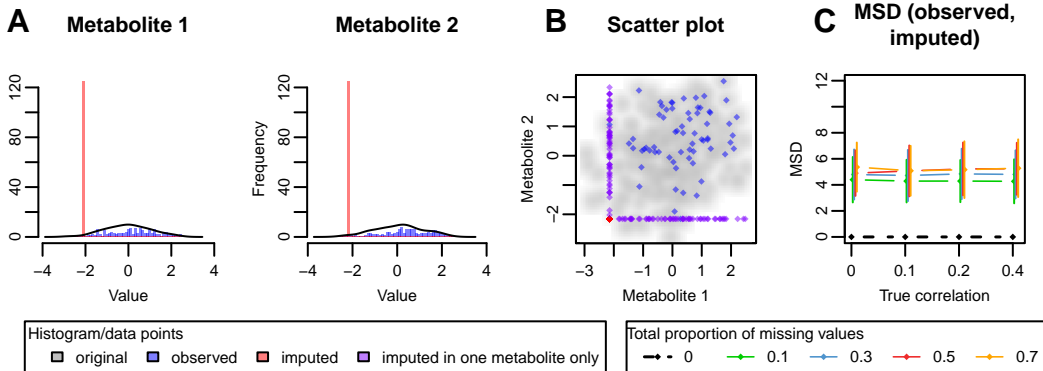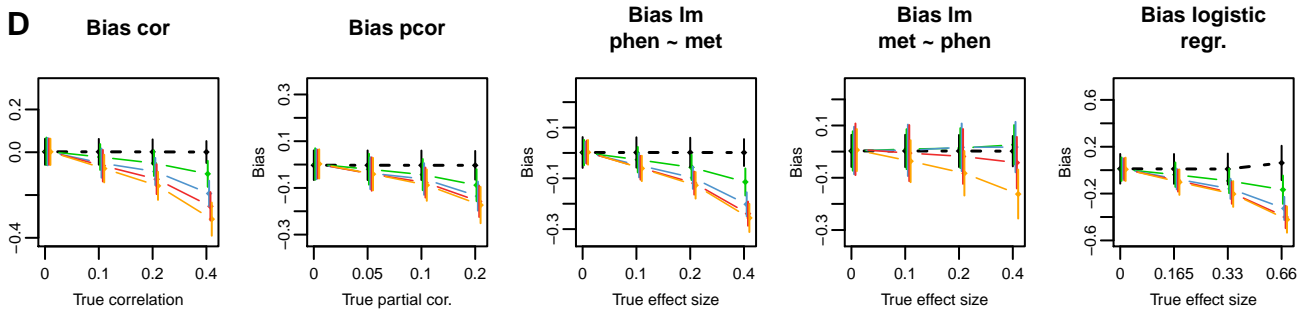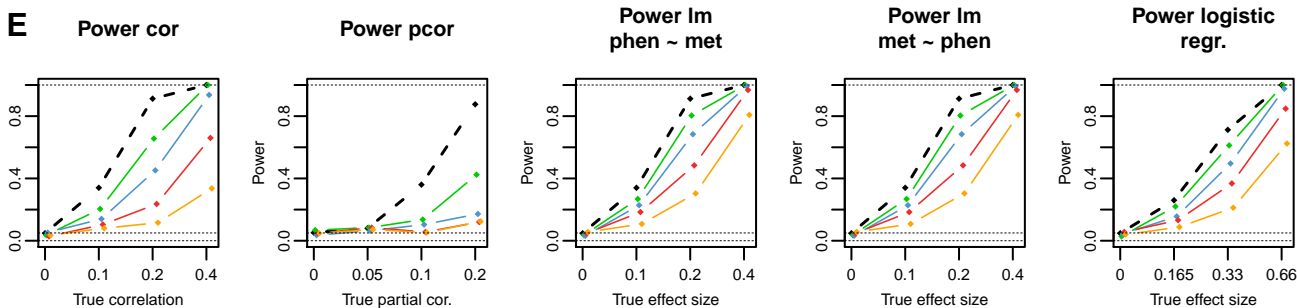

**A** Metabolite 1

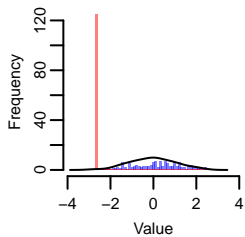

Metabolite 2

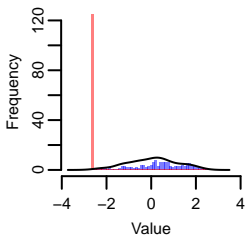

**B** Scatter plot

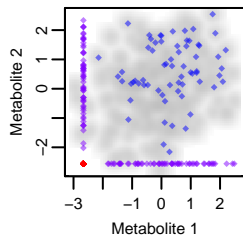

**C** MSD (observed, imputed)

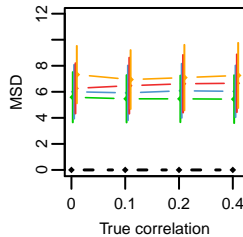

Histogram/data points

original observed imputed imputed in one metabolite only

Total proportion of missing values

0 0.1 0.3 0.5 0.7

**D** Bias cor

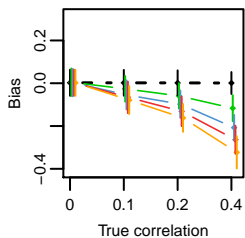

Bias pcor

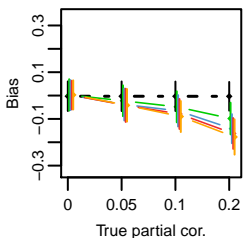

Bias lm phen ~ met

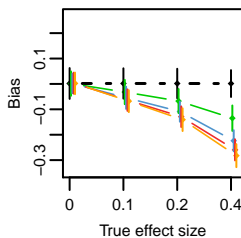

Bias lm met ~ phen

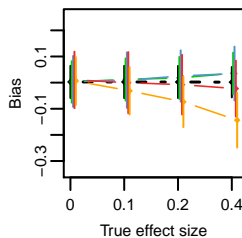

Bias logistic regr.

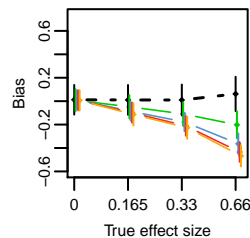

**E** Power cor

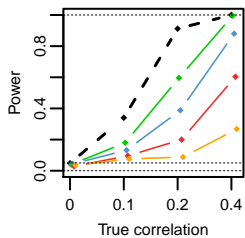

Power pcor

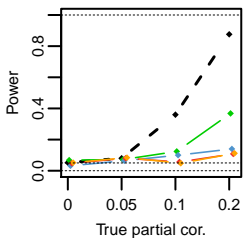

Power lm phen ~ met

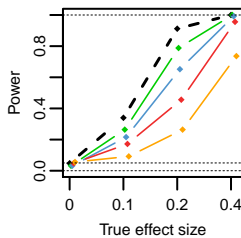

Power lm met ~ phen

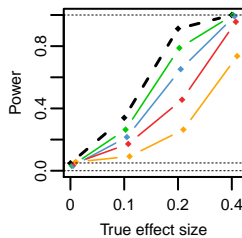

Power logistic regr.

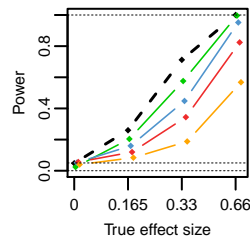

**A** Metabolite 1

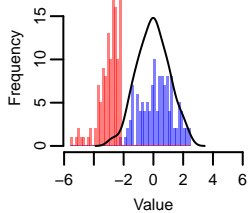

Metabolite 2

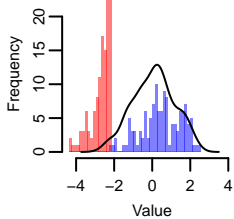

**B** Scatter plot

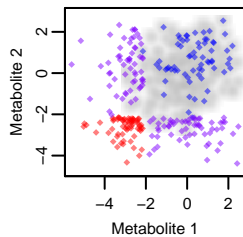

**C** MSD (observed, imputed)

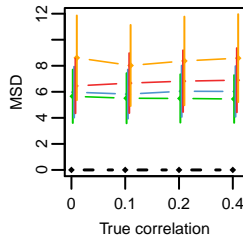

Histogram/data points  
 ■ original ■ observed ■ imputed ■ imputed in one metabolite only

Total proportion of missing values  
 - - 0 — 0.1 — 0.3 — 0.5 — 0.7

**D** Bias cor

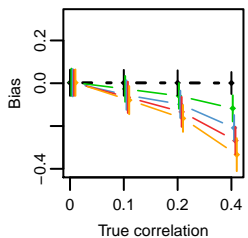

Bias pcor

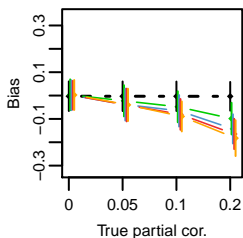

Bias Im phen ~ met

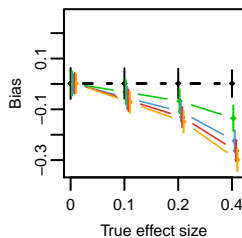

Bias Im met ~ phen

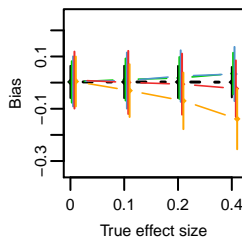

Bias logistic regr.

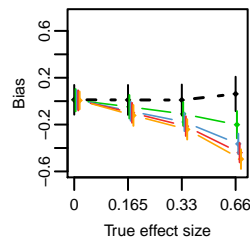

**E** Power cor

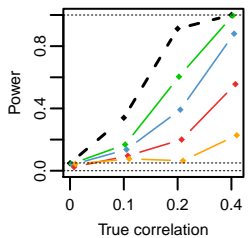

Power pcor

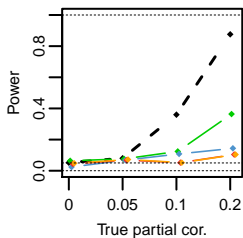

Power Im phen ~ met

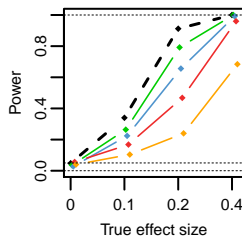

Power Im met ~ phen

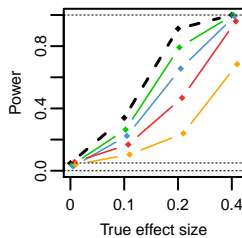

Power logistic regr.

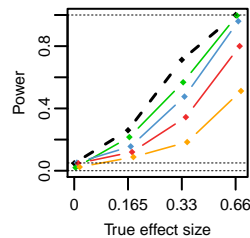

**A** Metabolite 1

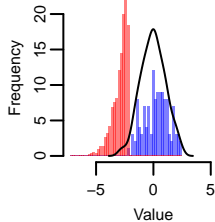

Metabolite 2

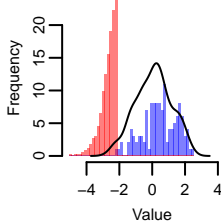

**B** Scatter plot

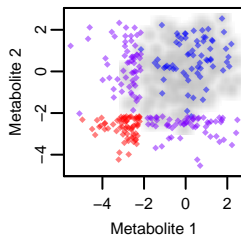

**C** MSD (observed, imputed)

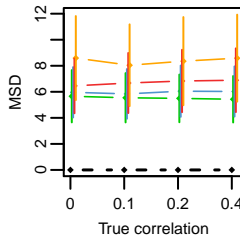

Histogram/data points

■ original ■ observed ■ imputed ■ imputed in one metabolite only

Total proportion of missing values

→ 0 → 0.1 → 0.3 → 0.5 → 0.7

**D** Bias cor

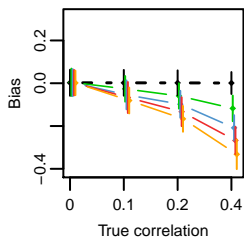

Bias pcor

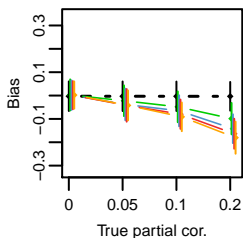

Bias lm phen ~ met

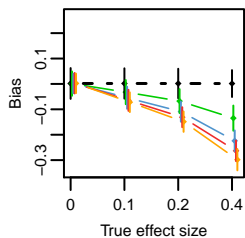

Bias lm met ~ phen

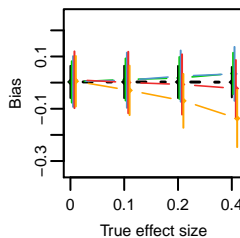

Bias logistic regr.

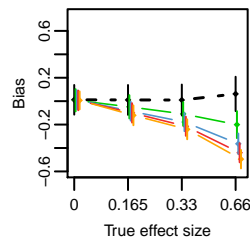

**E** Power cor

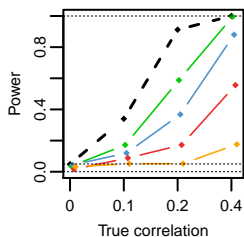

Power pcor

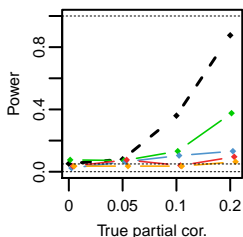

Power lm phen ~ met

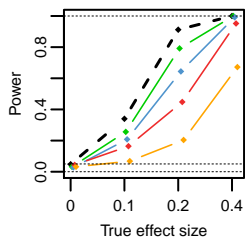

Power lm met ~ phen

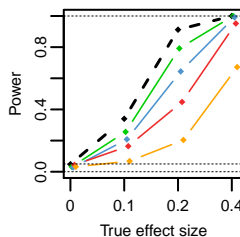

Power logistic regr.

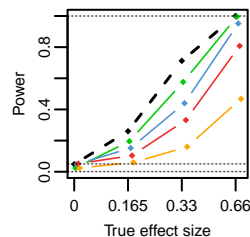

**A** Metabolite 1

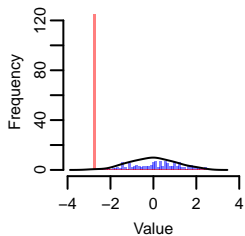

Metabolite 2

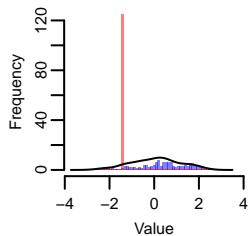

**B** Scatter plot

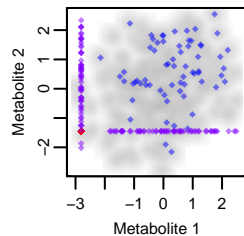

**C** MSD (observed, imputed)

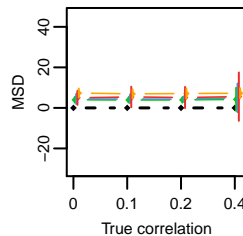

Histogram/data points

original observed imputed imputed in one metabolite only

Total proportion of missing values

0 0.1 0.3 0.5 0.7

**D** Bias cor

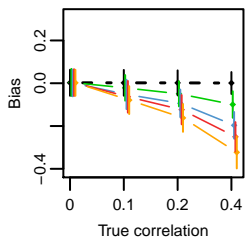

Bias pcor

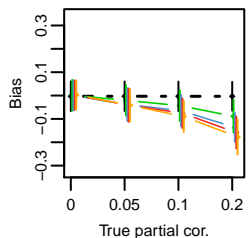

Bias lm phen ~ met

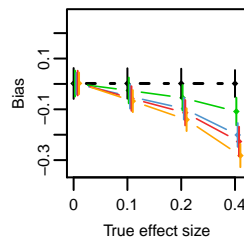

Bias lm met ~ phen

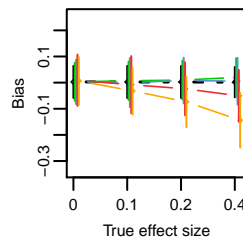

Bias logistic regr.

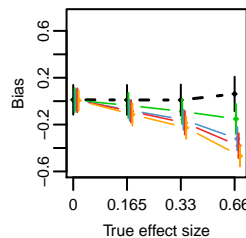

**E** Power cor

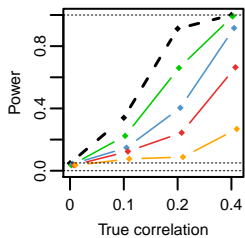

Power pcor

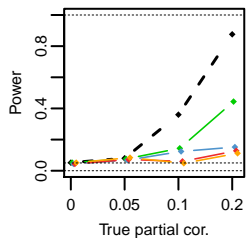

Power lm phen ~ met

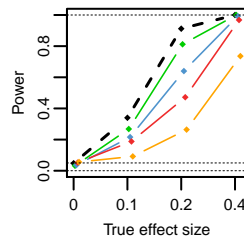

Power lm met ~ phen

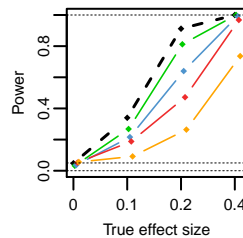

Power logistic regr.

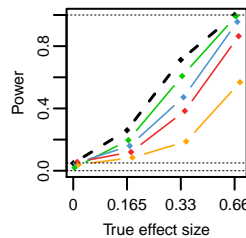

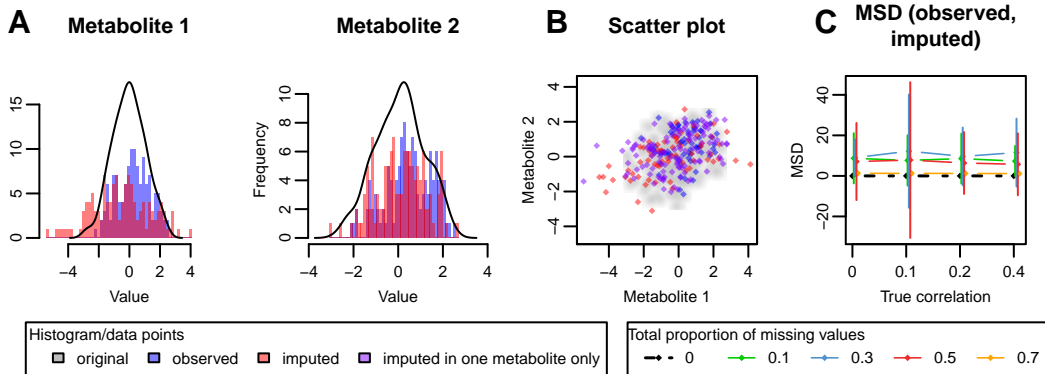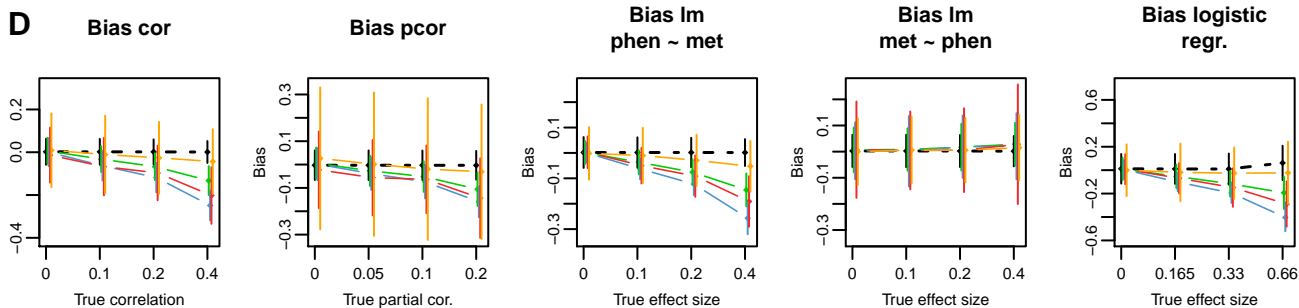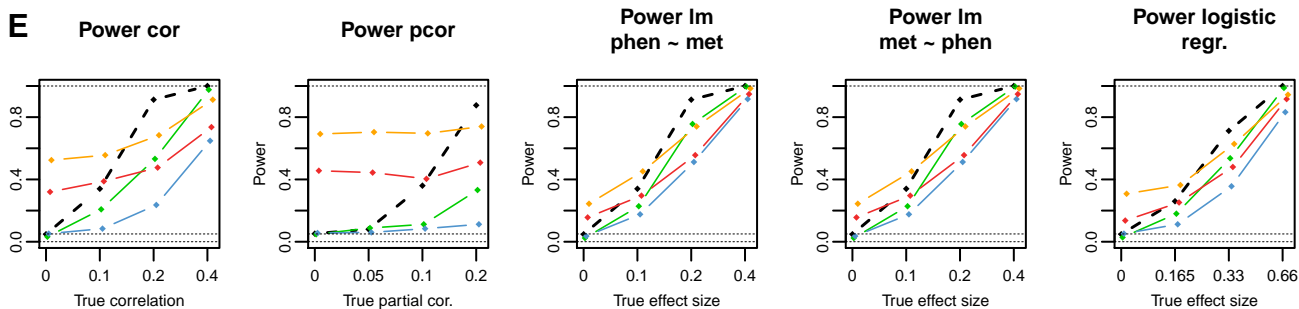

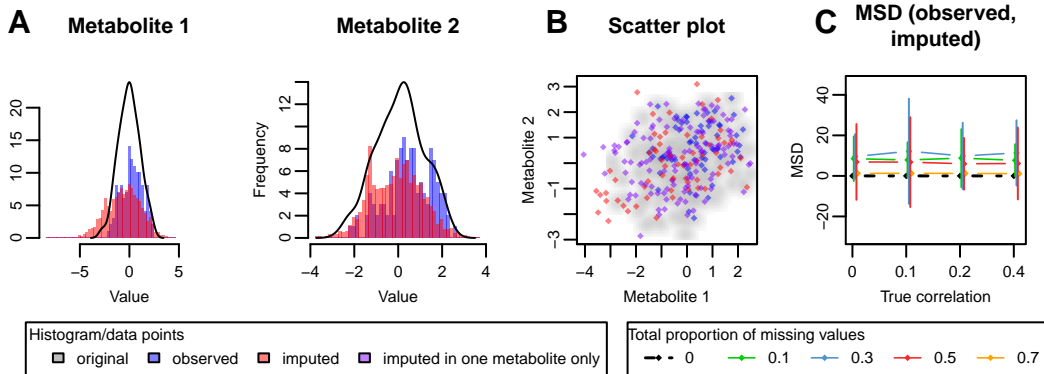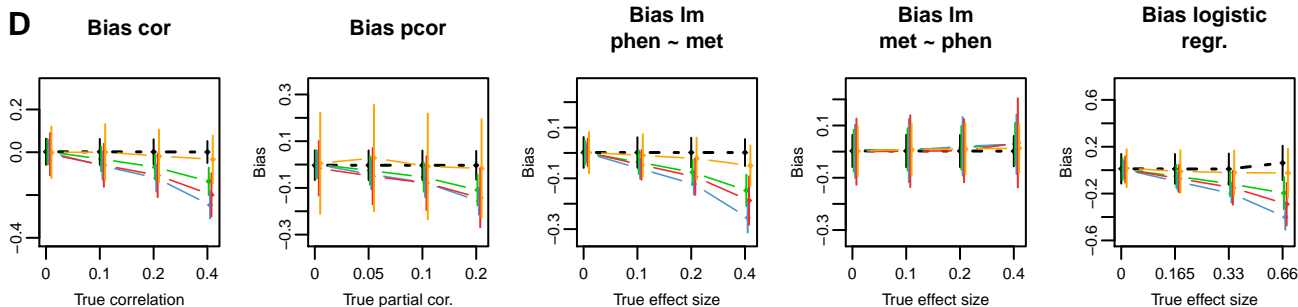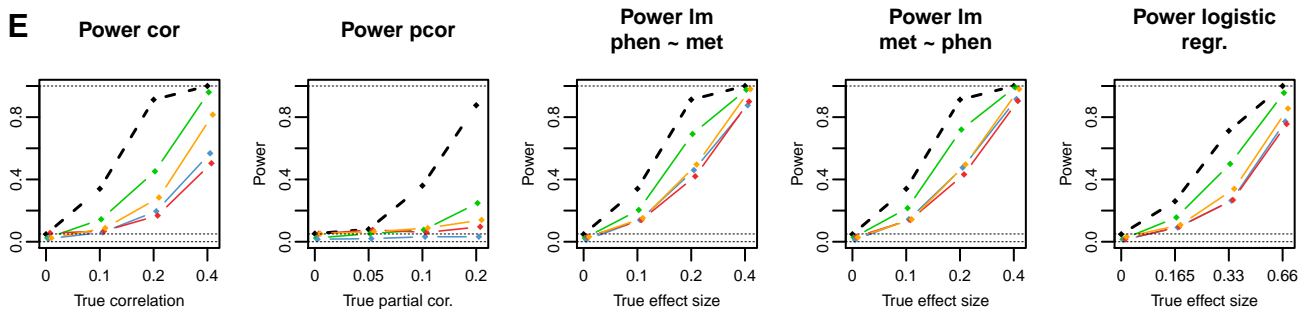

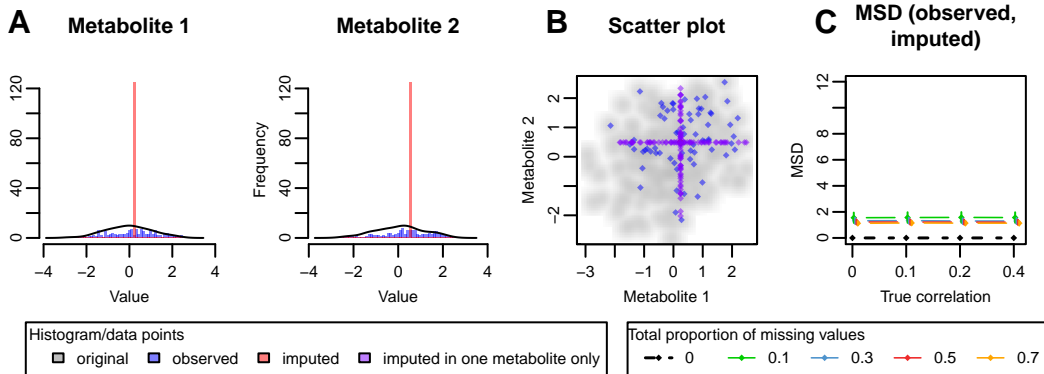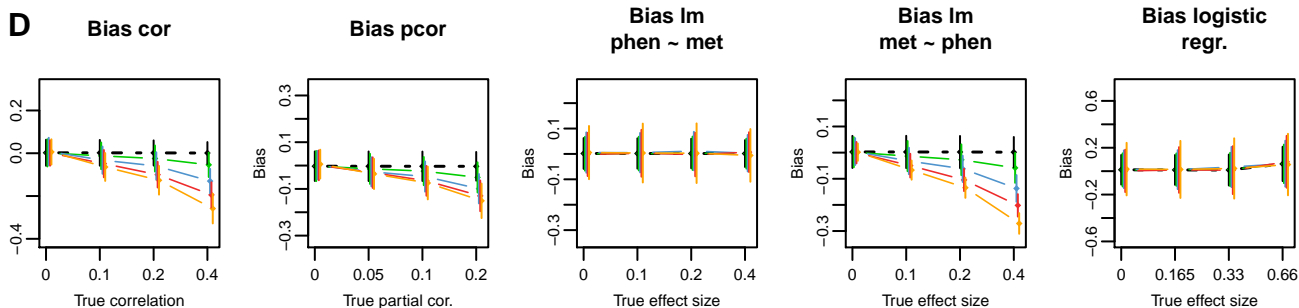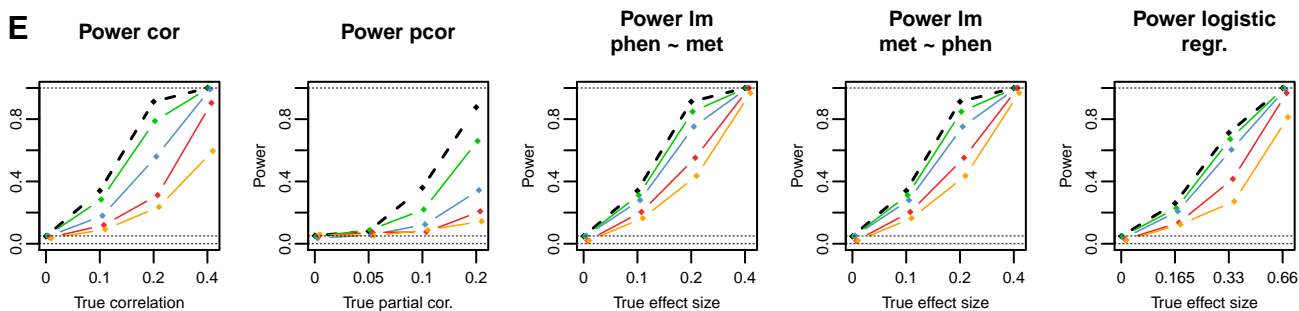



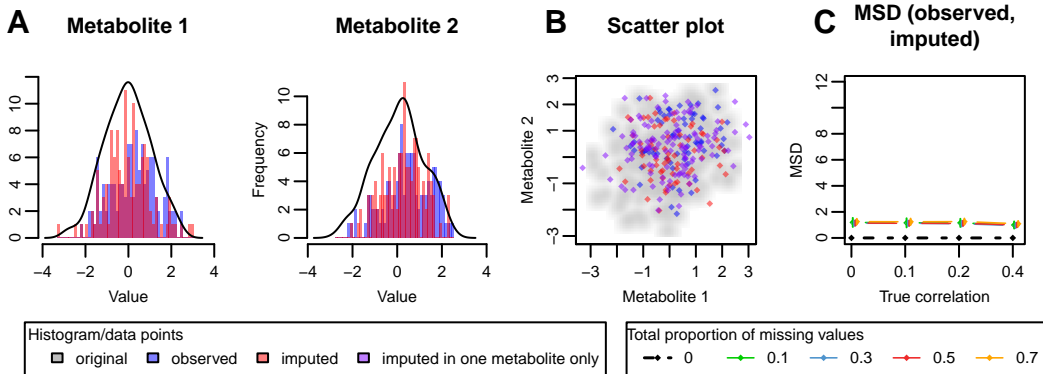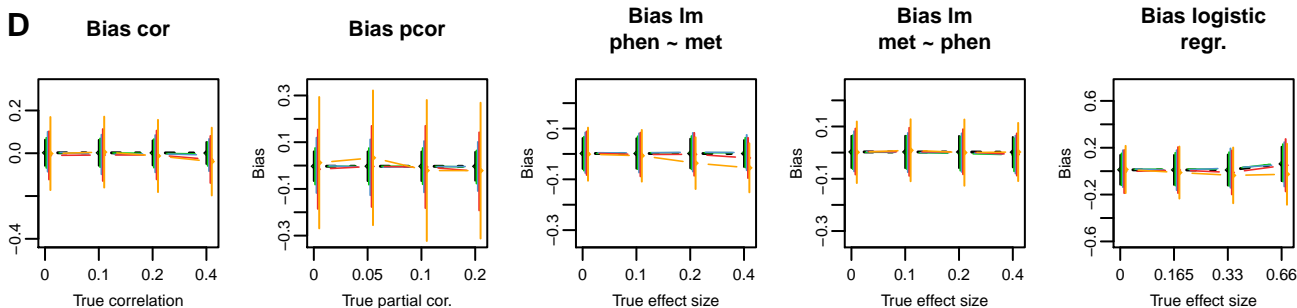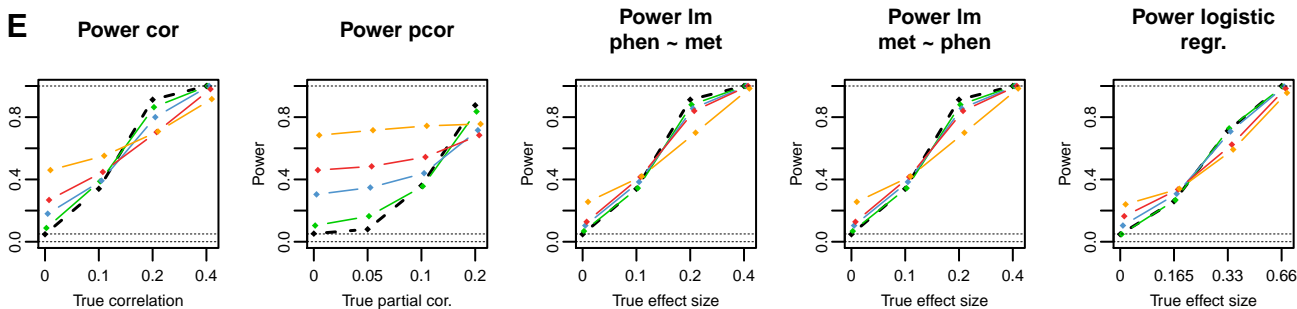

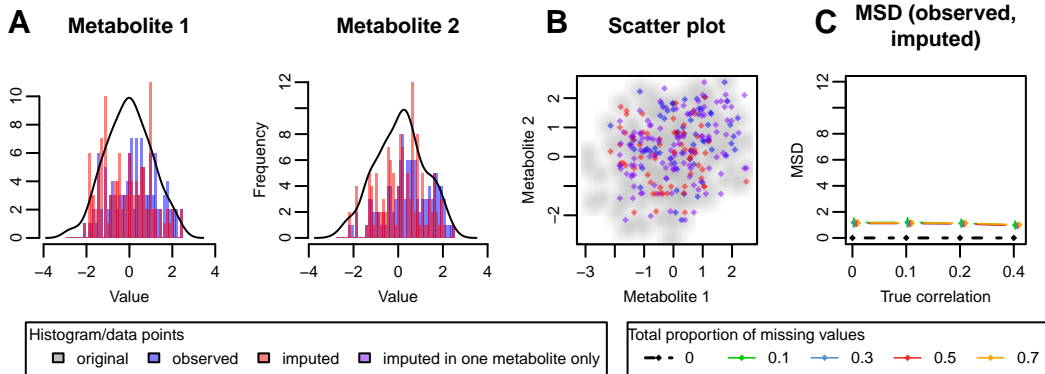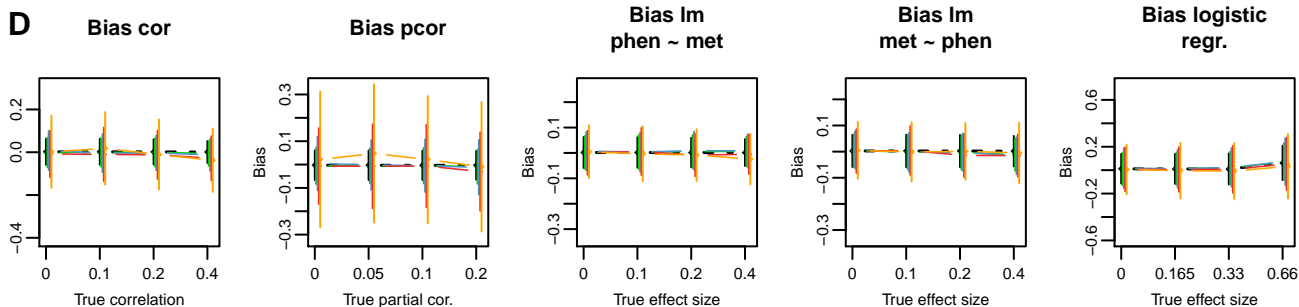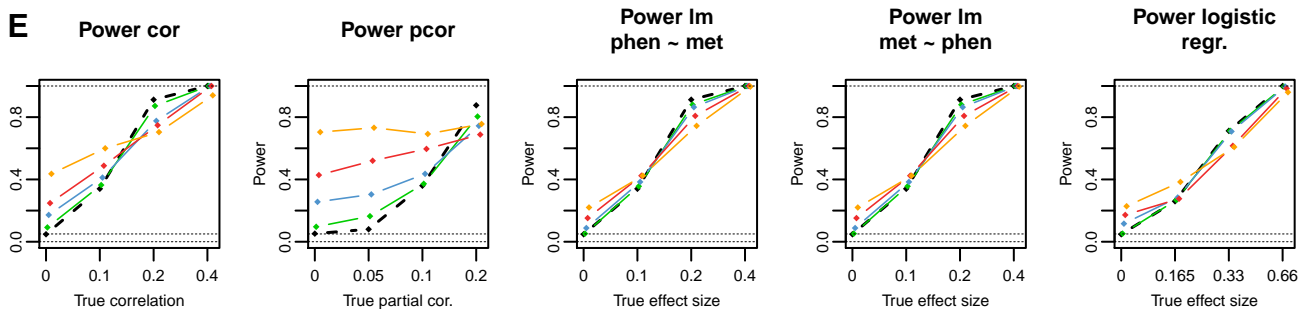

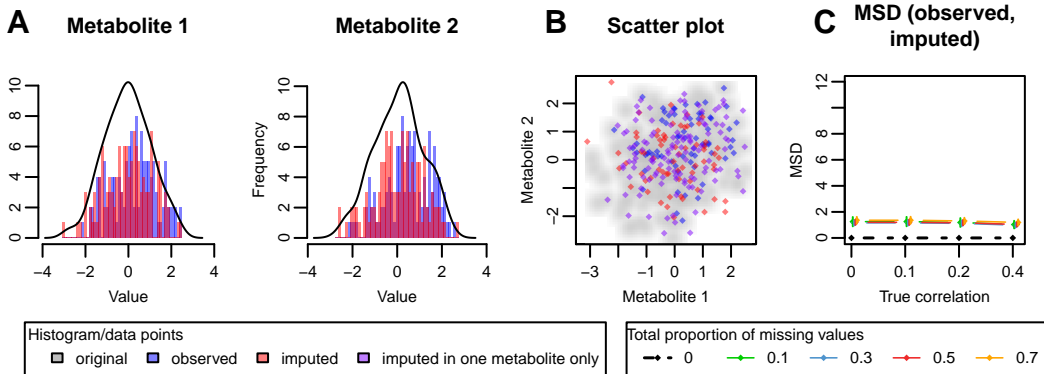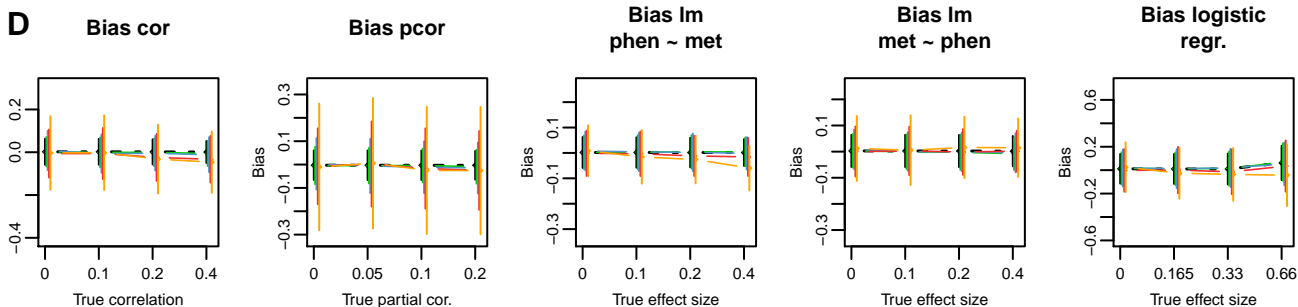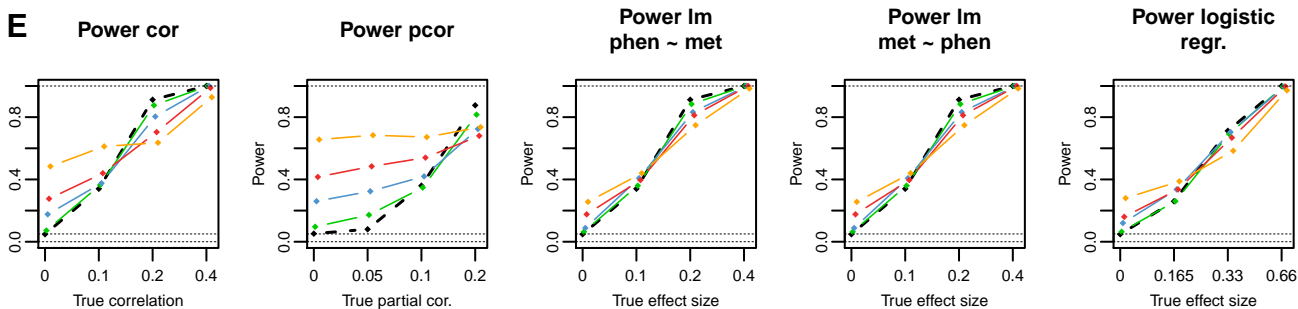

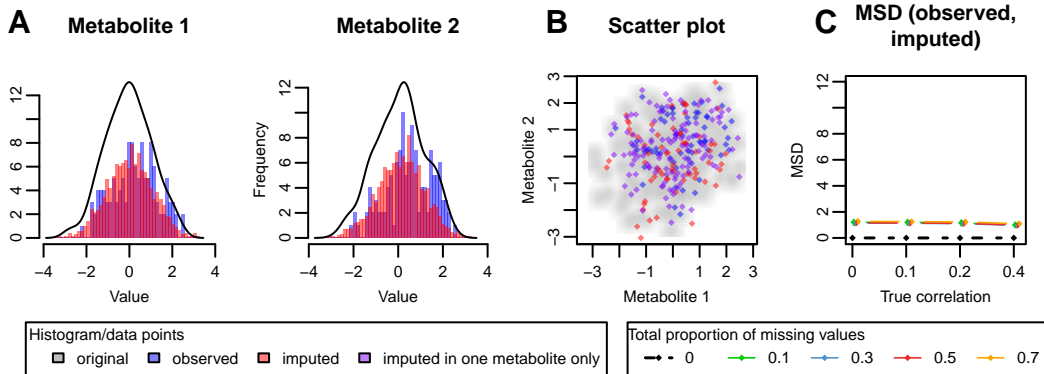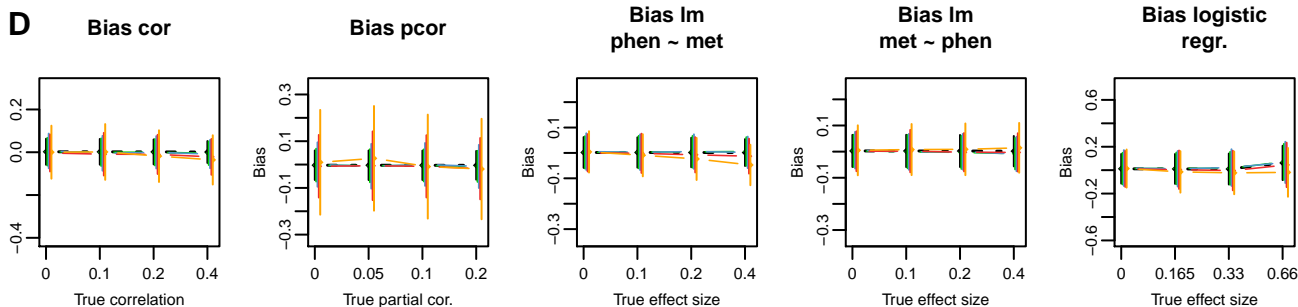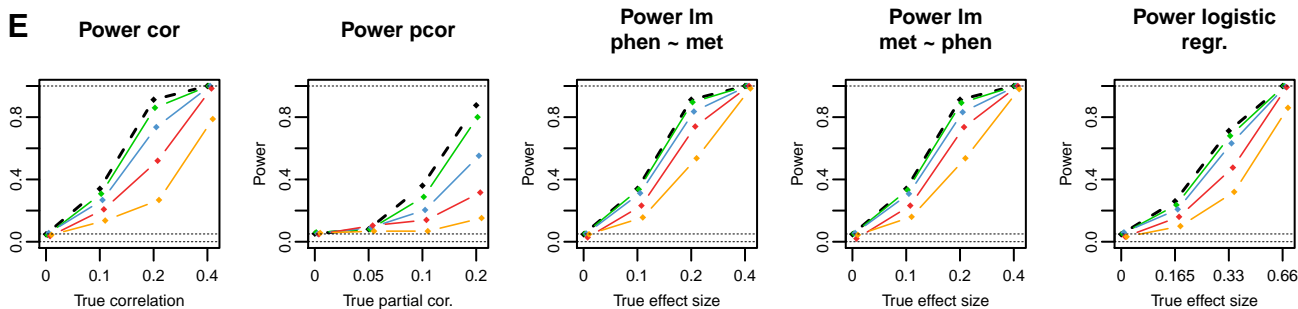

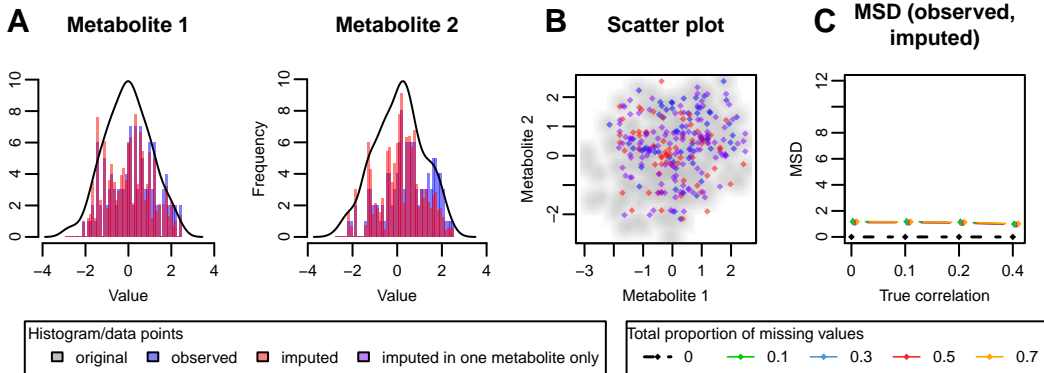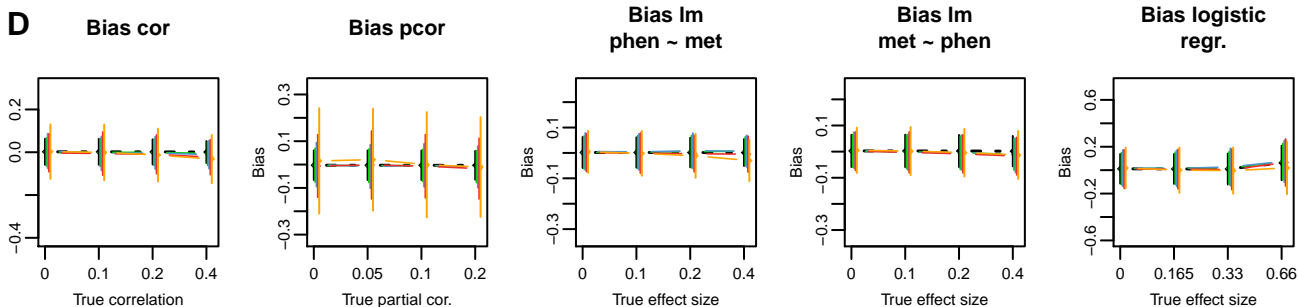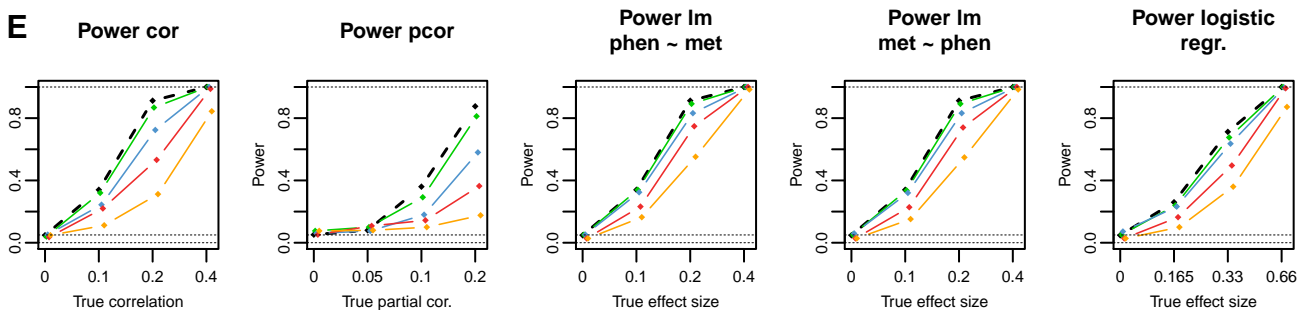

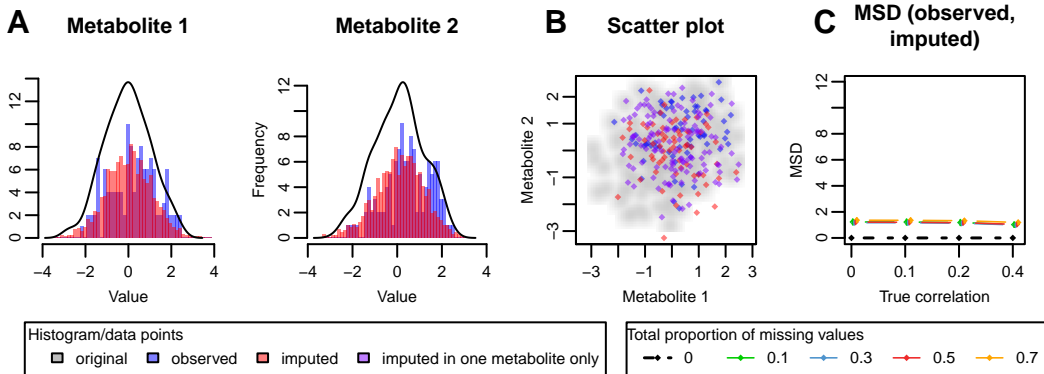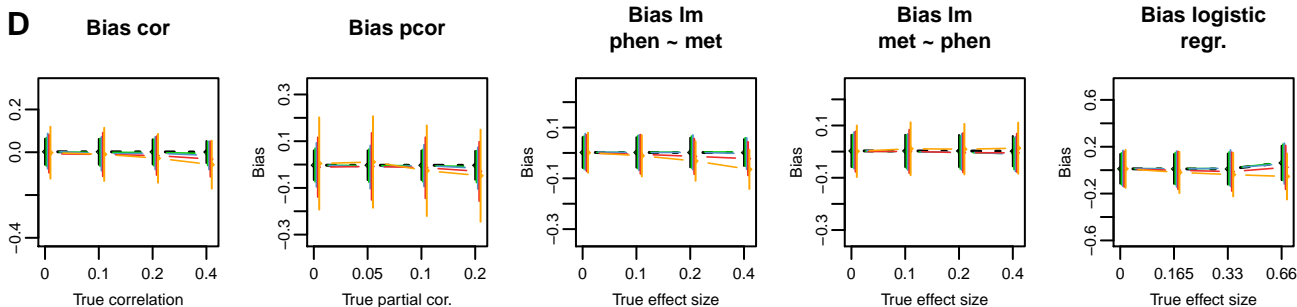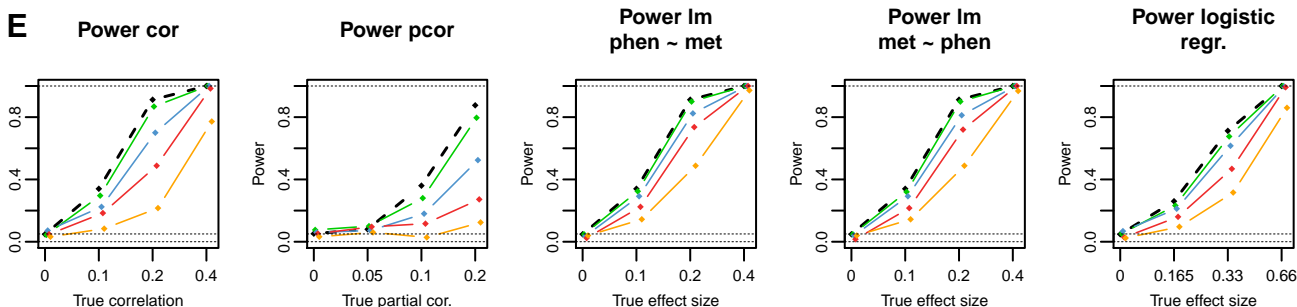

**A** Metabolite 1

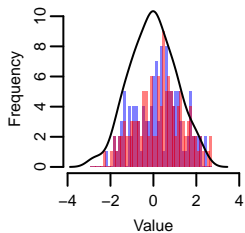

Metabolite 2

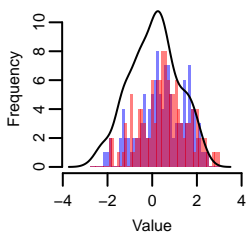

**B** Scatter plot

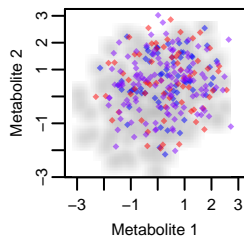

**C** MSD (observed, imputed)

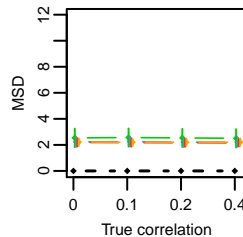

Histogram/data points

original observed imputed imputed in one metabolite only

Total proportion of missing values

0 0.1 0.3 0.5 0.7

**D** Bias cor

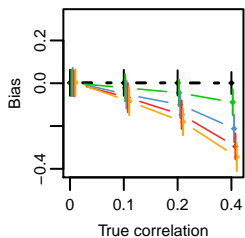

Bias pcor

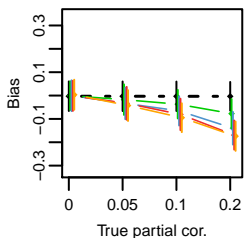

Bias lm phen ~ met

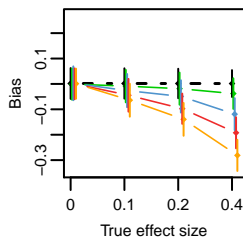

Bias lm met ~ phen

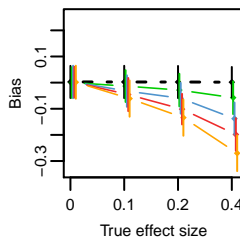

Bias logistic regr.

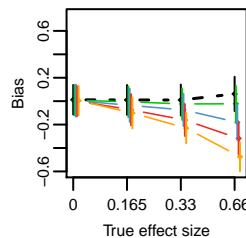

**E** Power cor

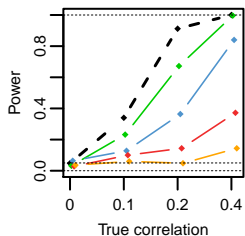

Power pcor

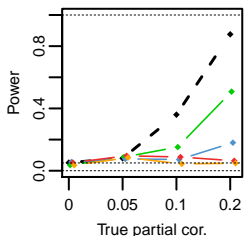

Power lm phen ~ met

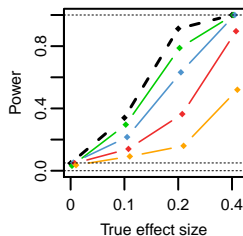

Power lm met ~ phen

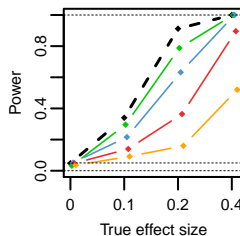

Power logistic regr.

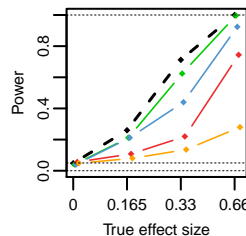

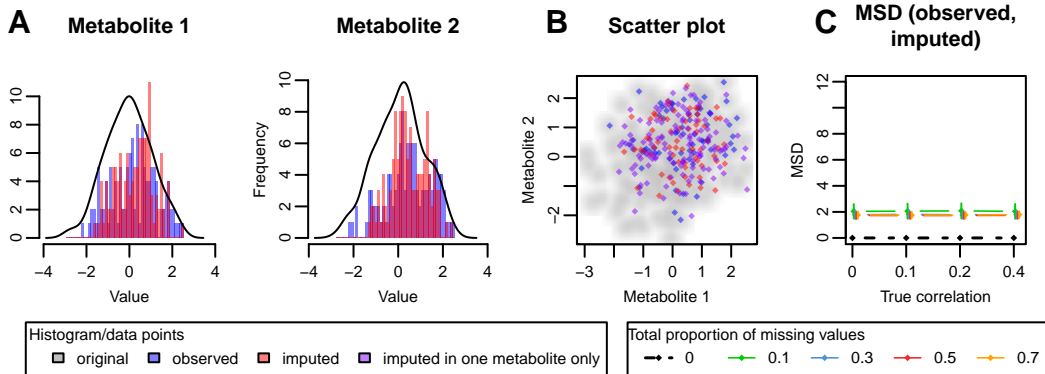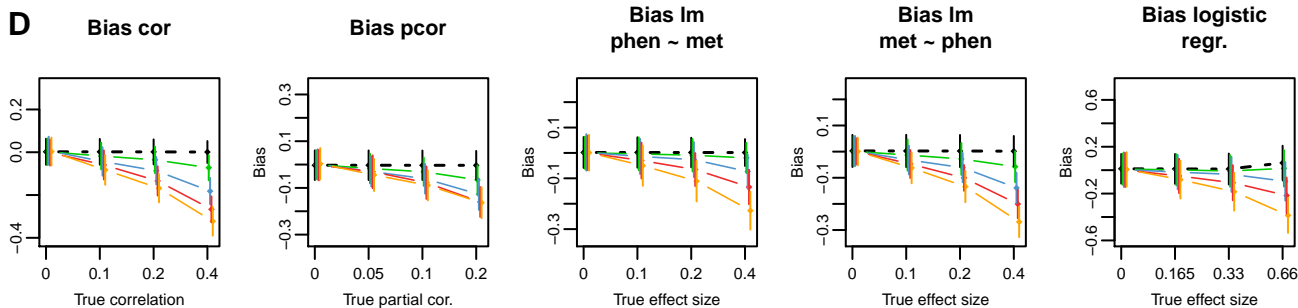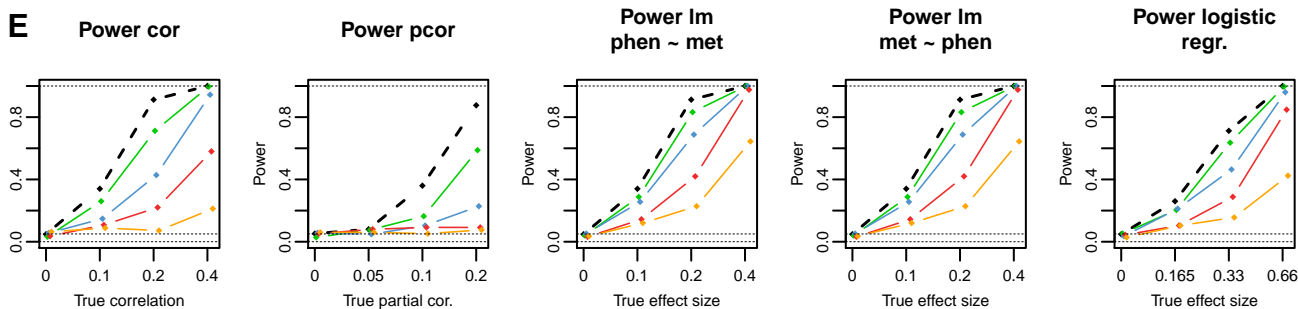



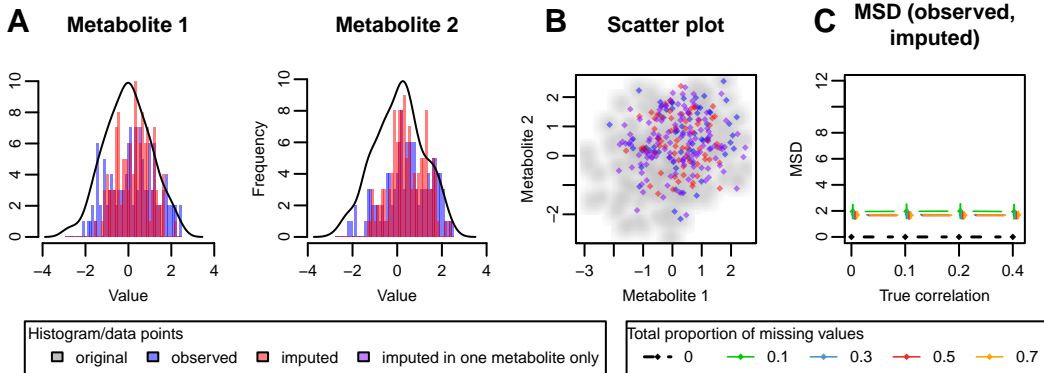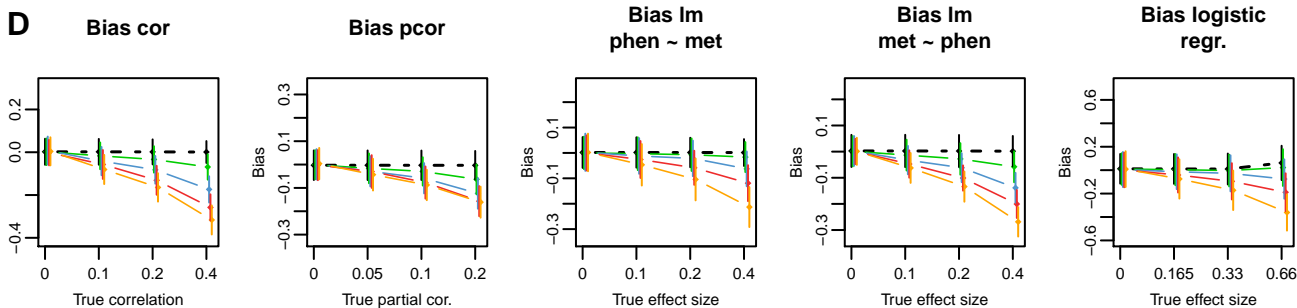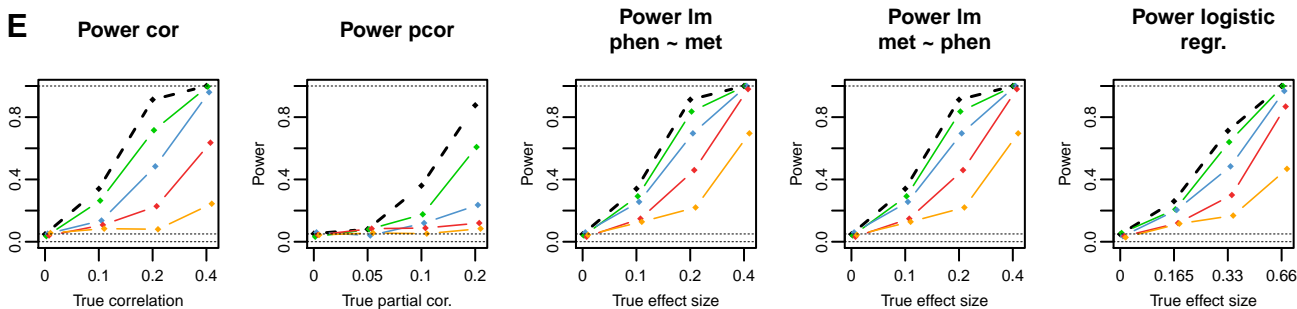

**A** Metabolite 1

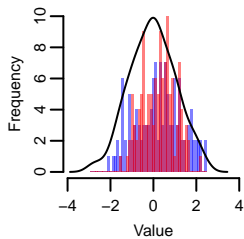

Metabolite 2

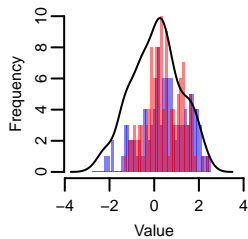

**B** Scatter plot

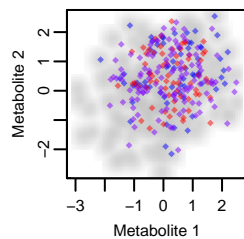

**C** MSD (observed, imputed)

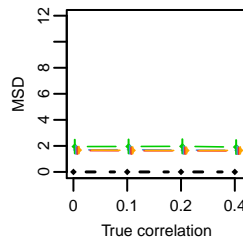

Histogram/data points

original observed imputed imputed in one metabolite only

Total proportion of missing values

0 0.1 0.3 0.5 0.7

**D** Bias cor

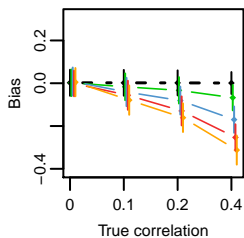

Bias pcor

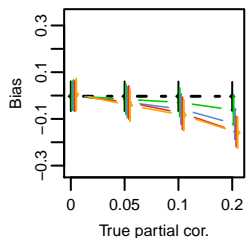

Bias lm phen ~ met

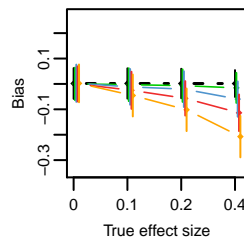

Bias lm met ~ phen

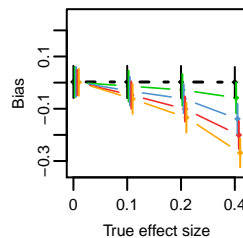

Bias logistic regr.

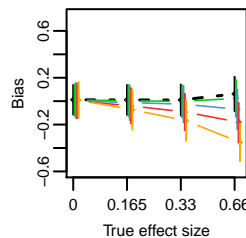

**E** Power cor

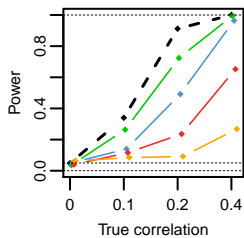

Power pcor

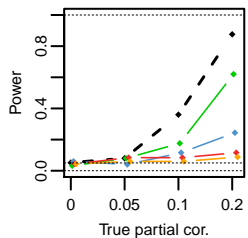

Power lm phen ~ met

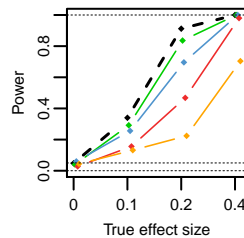

Power lm met ~ phen

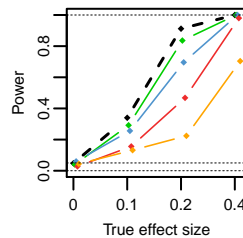

Power logistic regr.

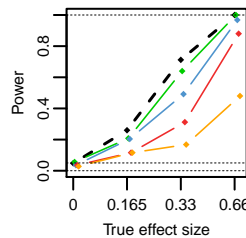

**A** Metabolite 1

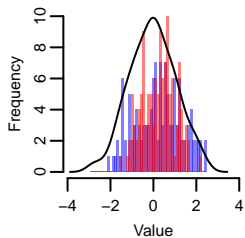

Metabolite 2

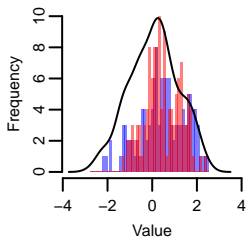

**B** Scatter plot

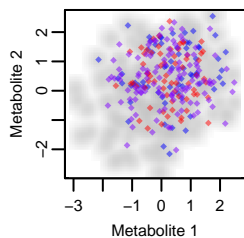

**C** MSD (observed, imputed)

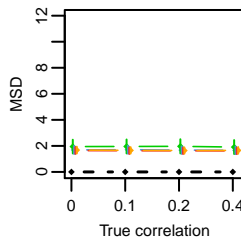

Histogram/data points

original observed imputed imputed in one metabolite only

Total proportion of missing values

0 0.1 0.3 0.5 0.7

**D** Bias cor

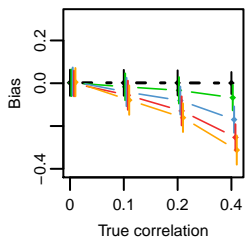

Bias pcor

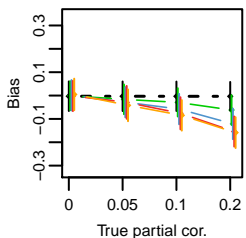

Bias lm phen ~ met

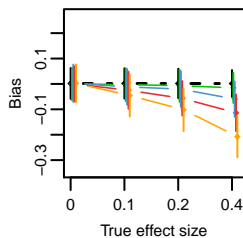

Bias lm met ~ phen

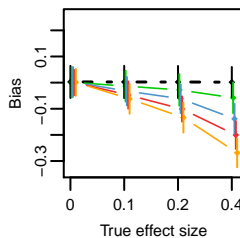

Bias logistic regr.

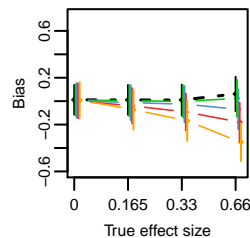

**E** Power cor

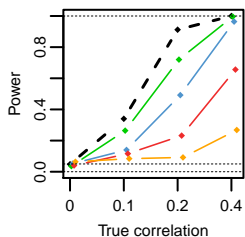

Power pcor

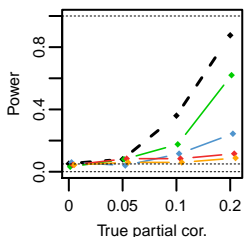

Power lm phen ~ met

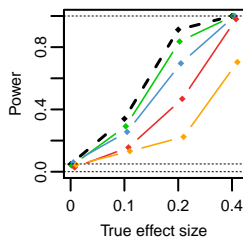

Power lm met ~ phen

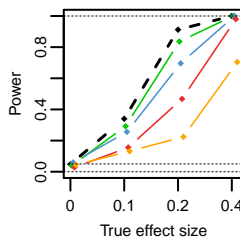

Power logistic regr.

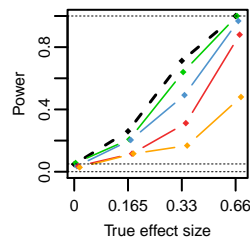

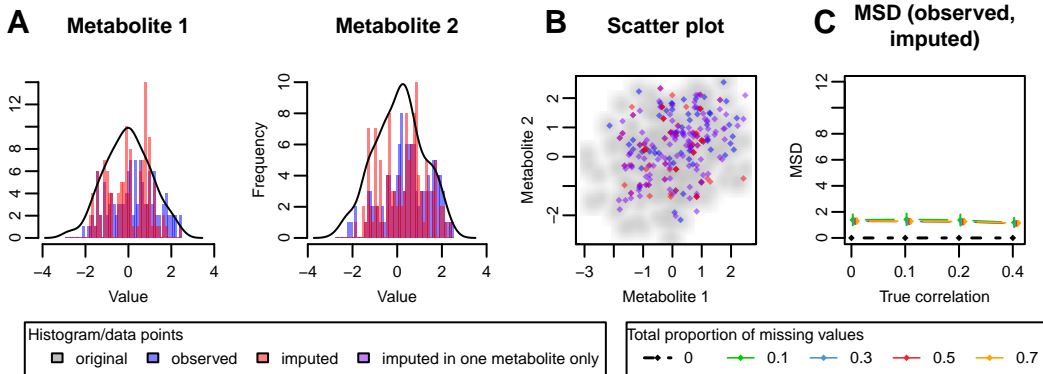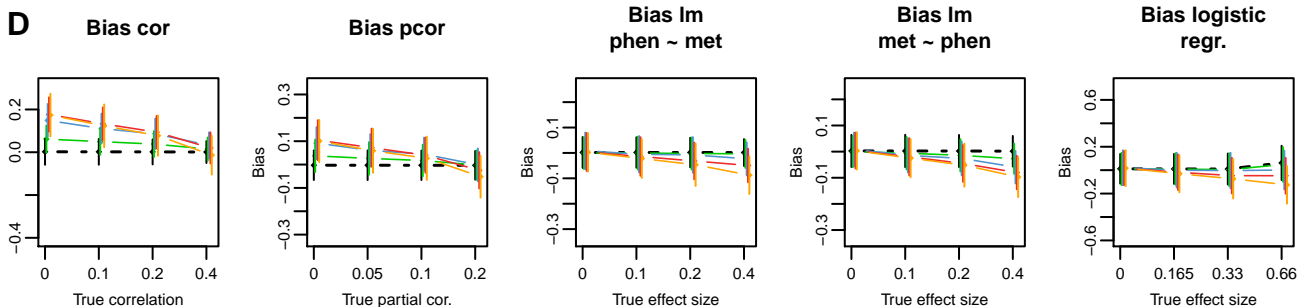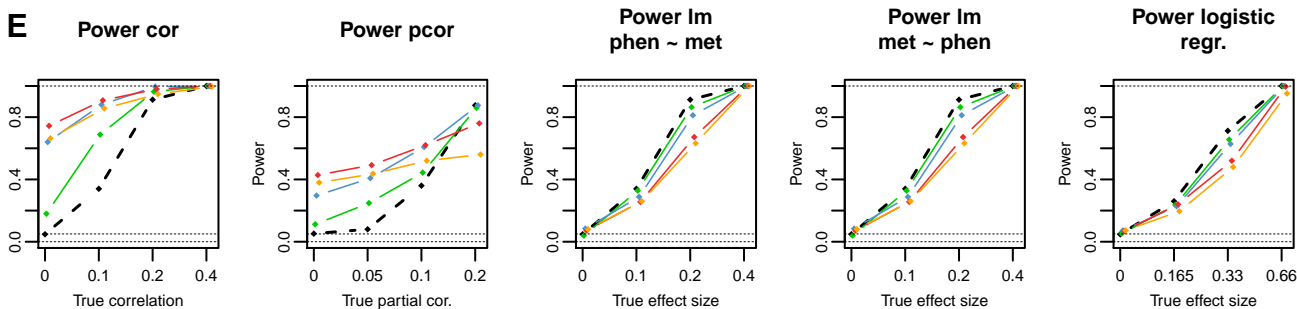

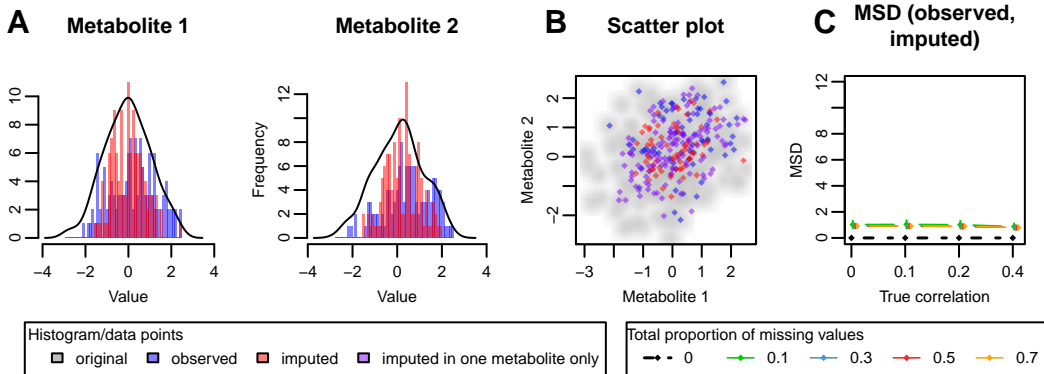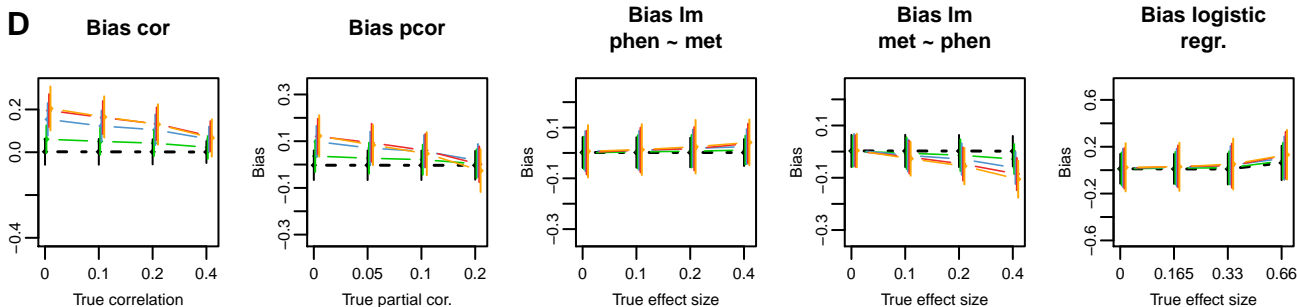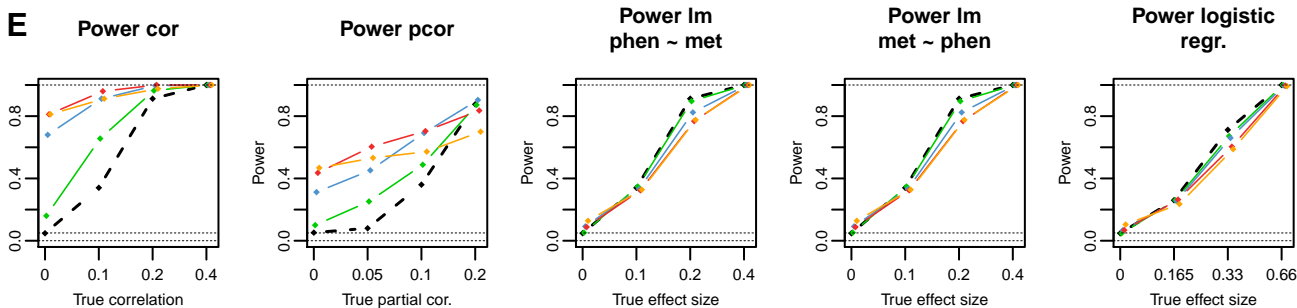

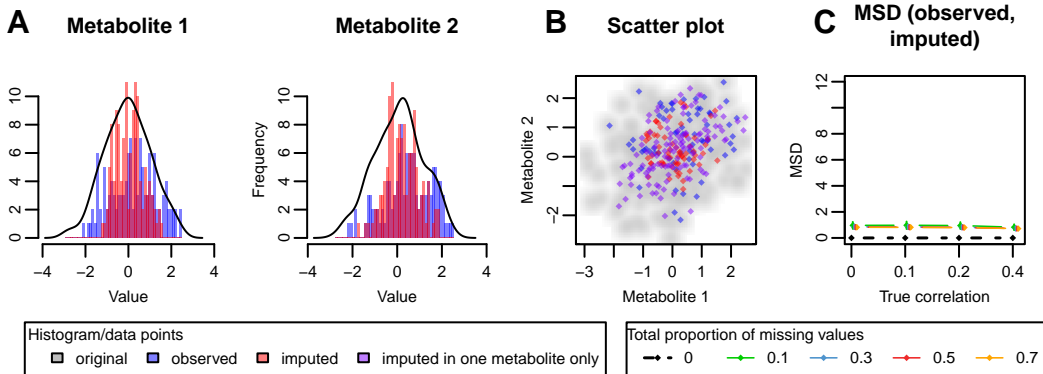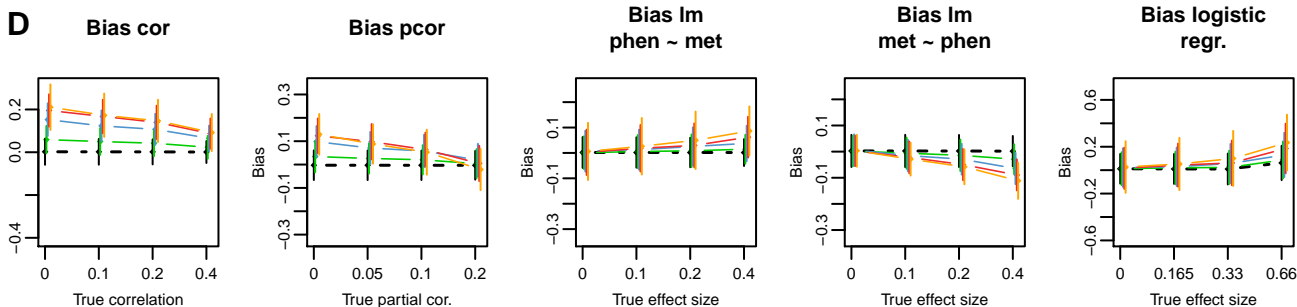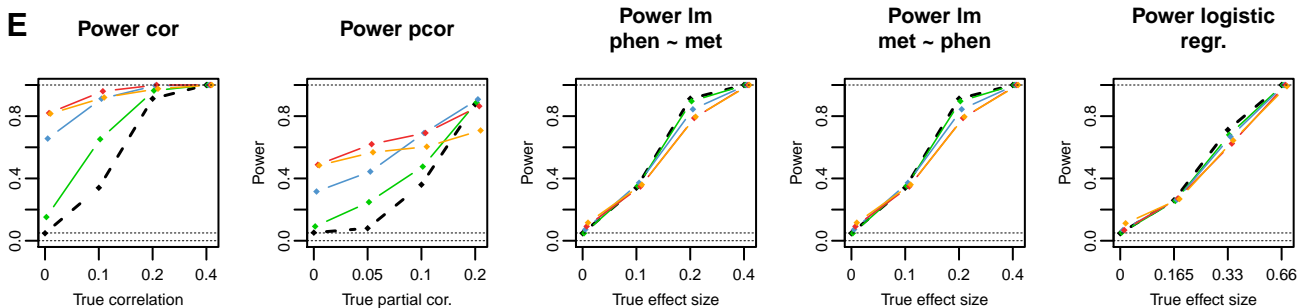

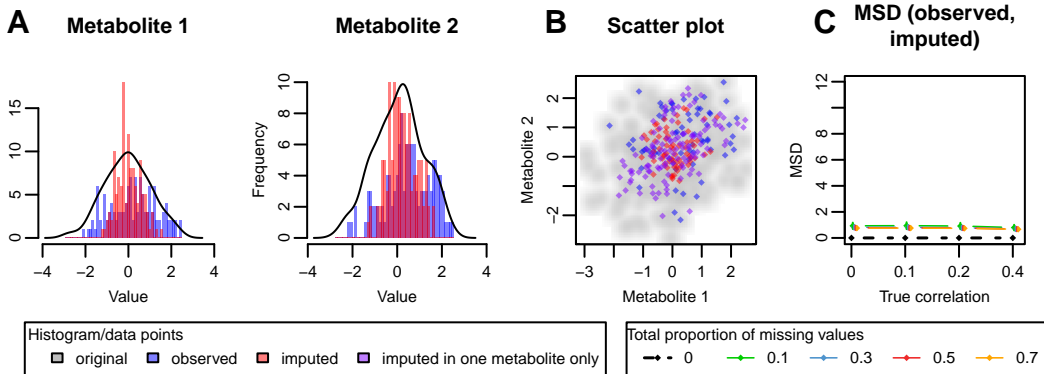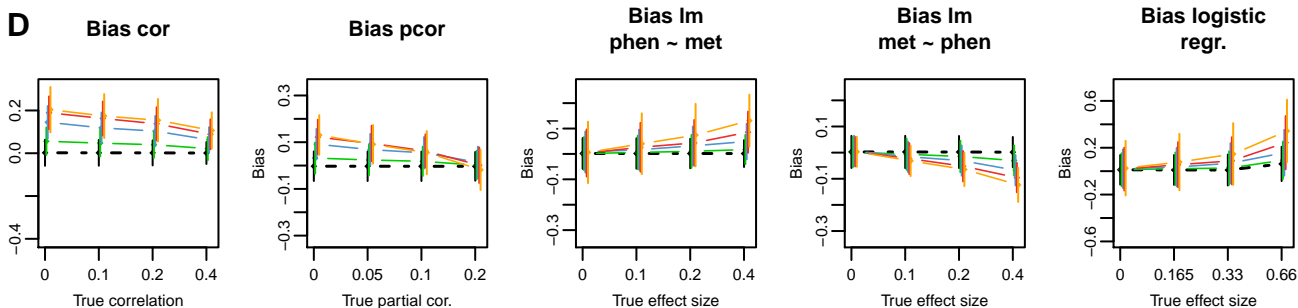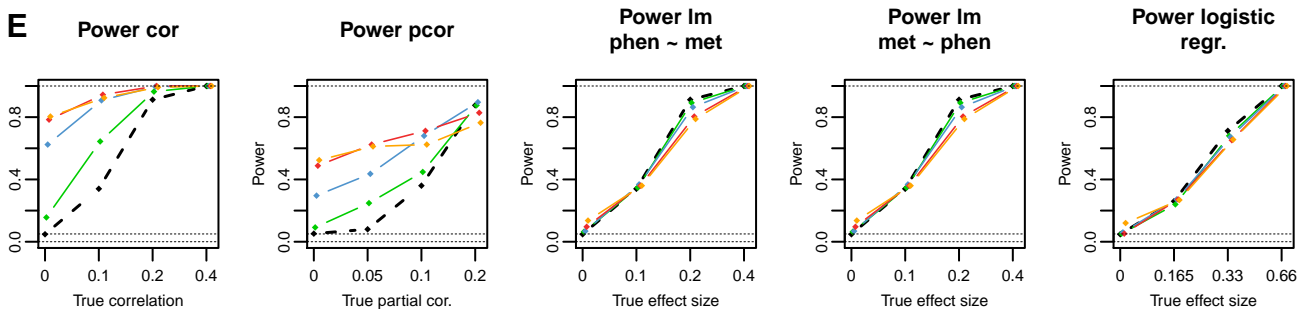

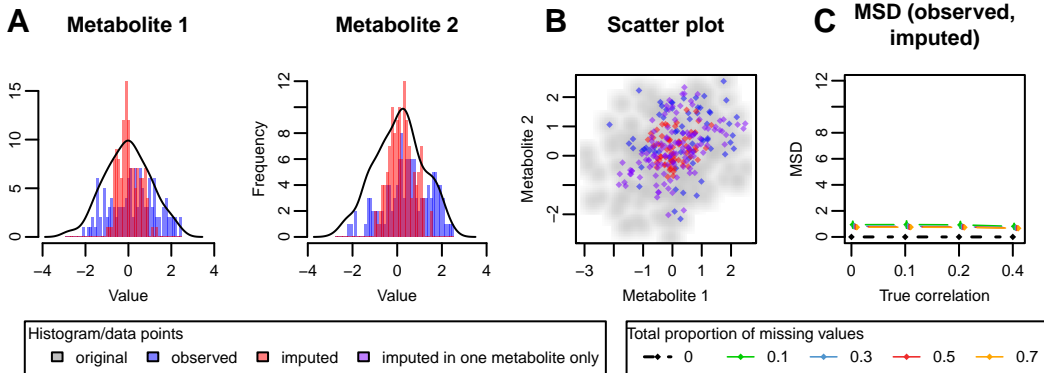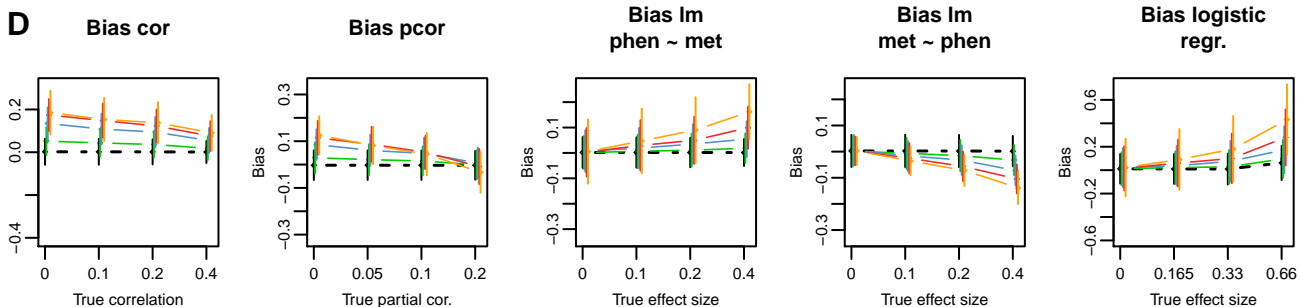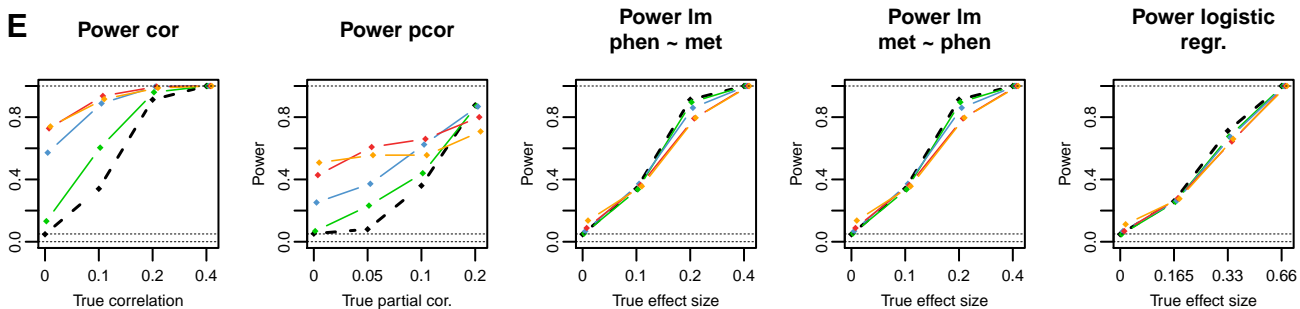



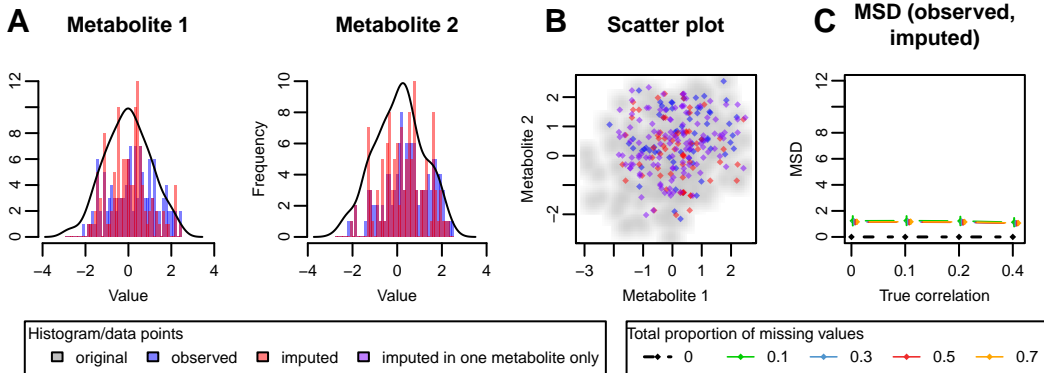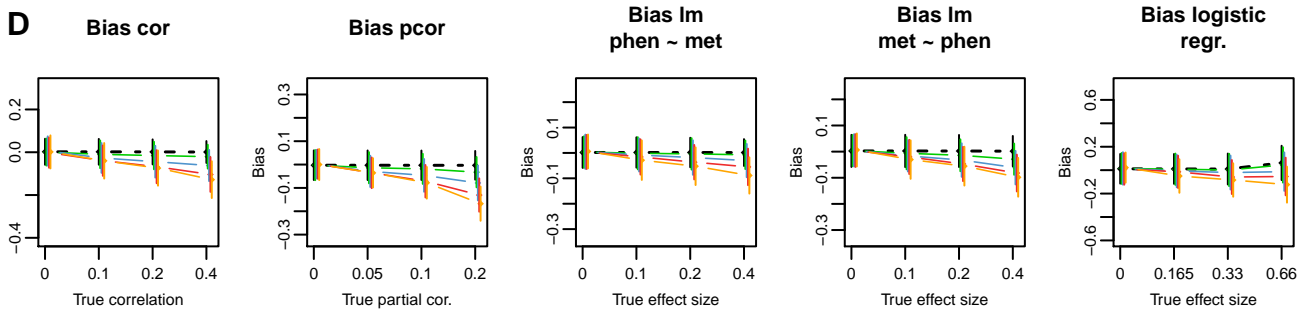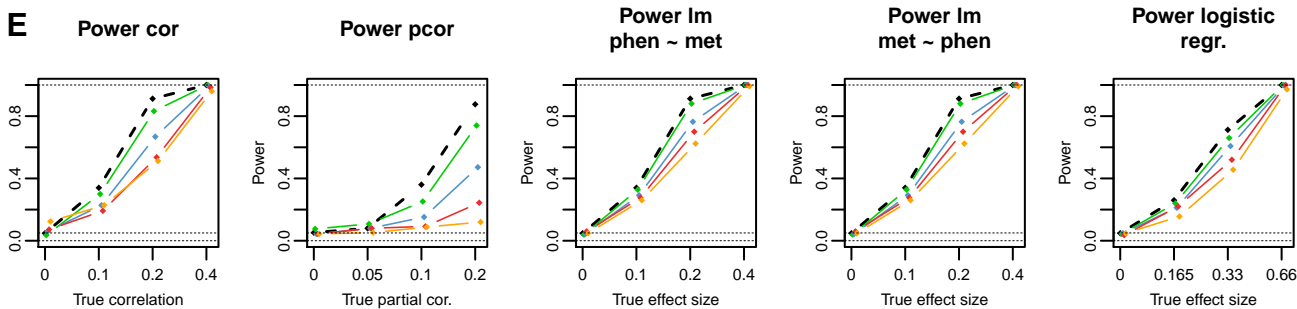

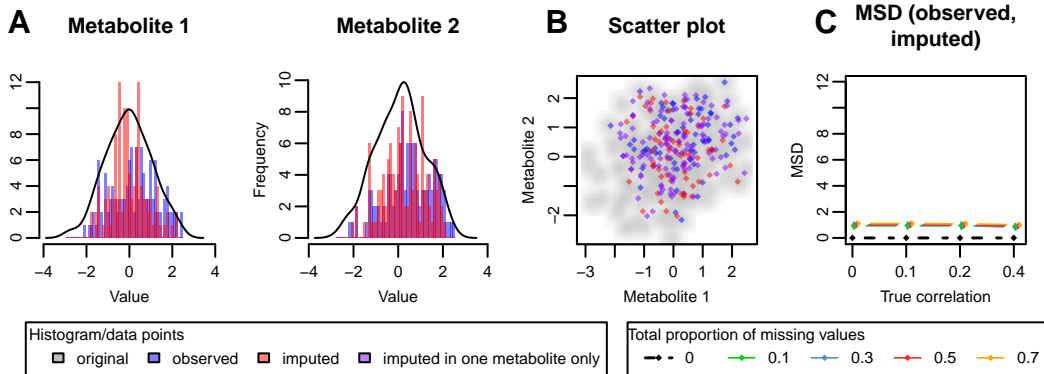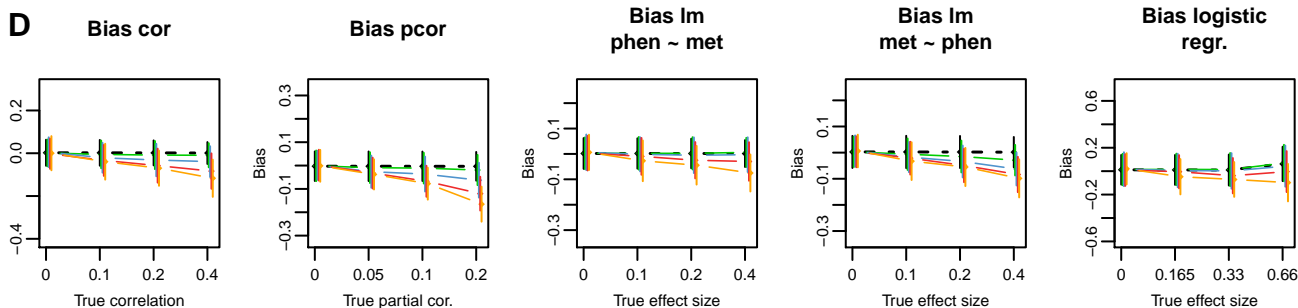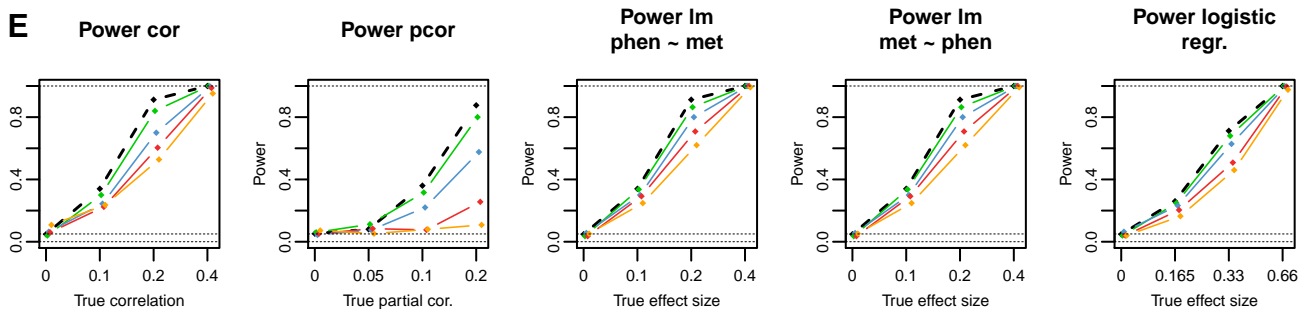

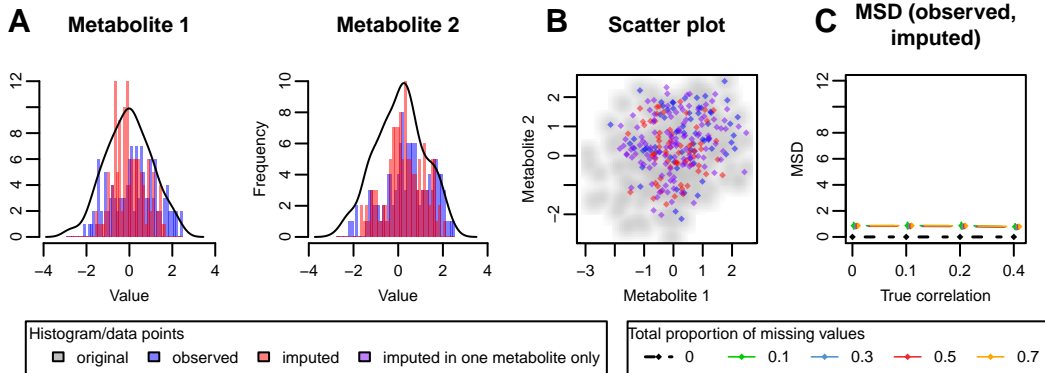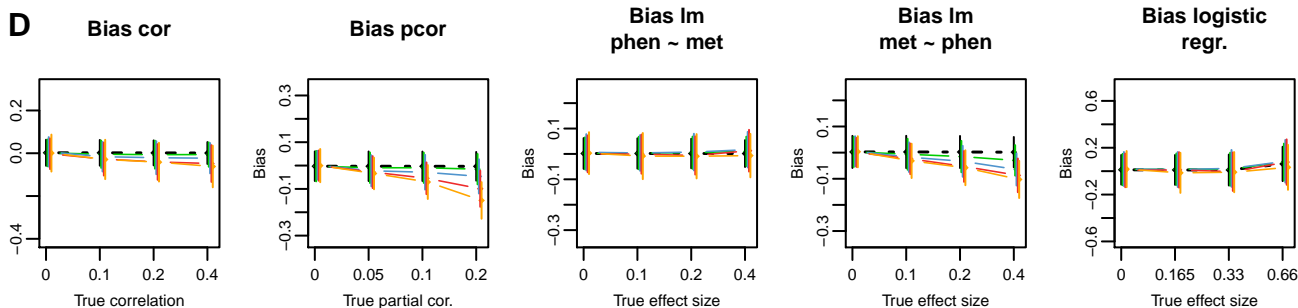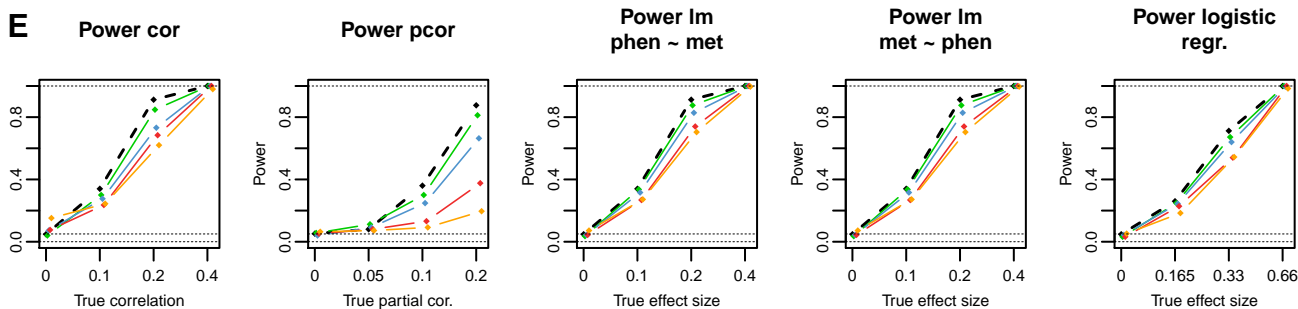

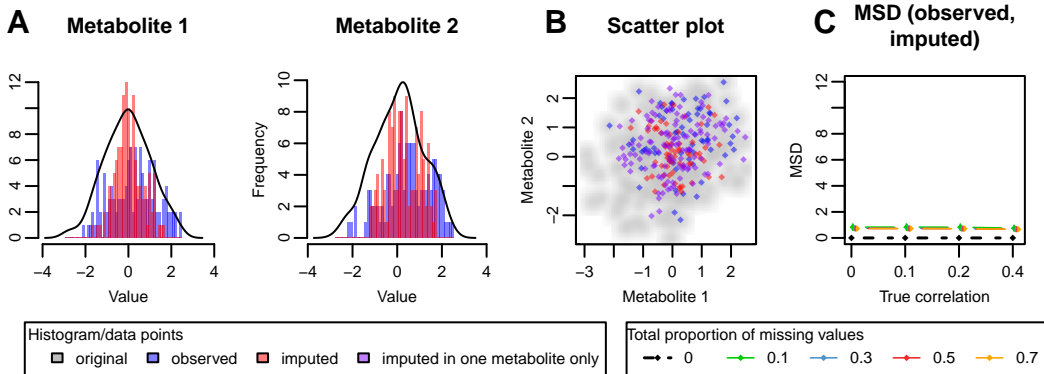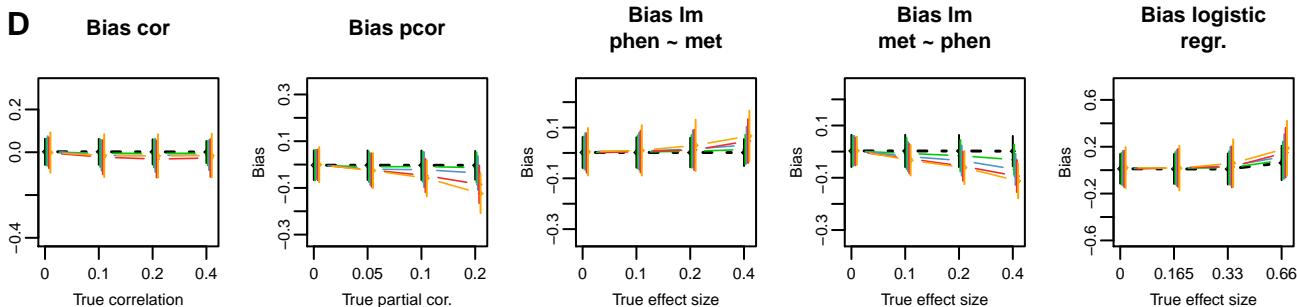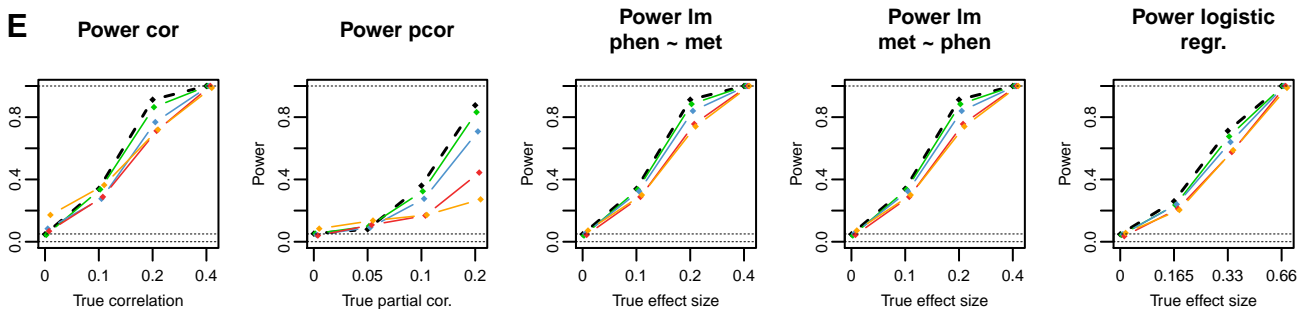

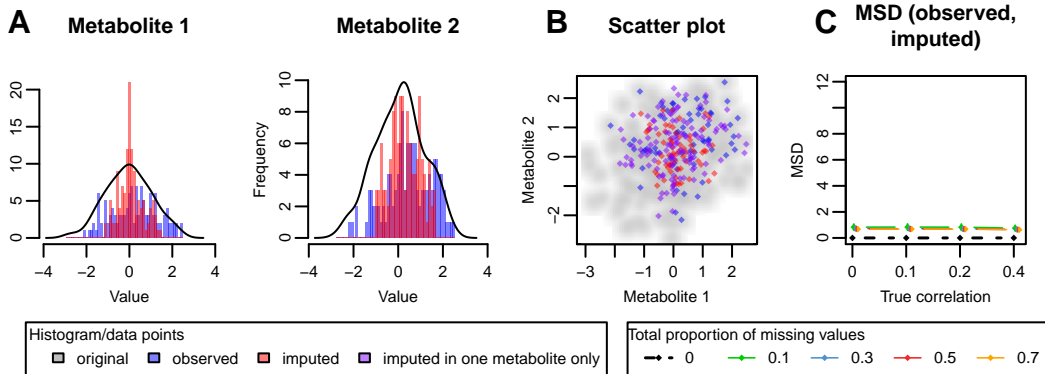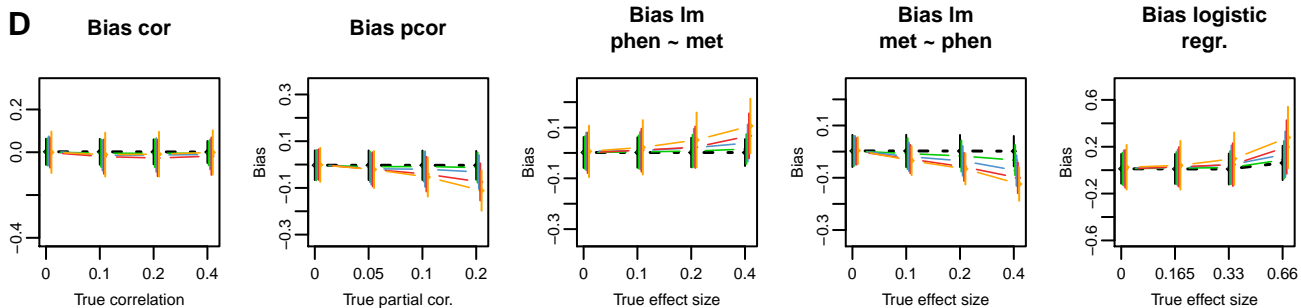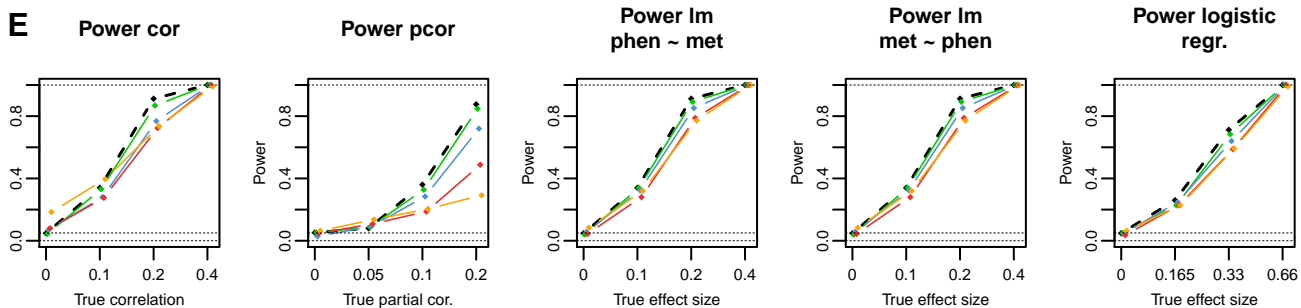

Supplement: 11306_2018_1420_MOESM5_ESM.pdf [file 11306_2018_1420_MOESM5_ESM.pdf]
