# Supplementary material for: Characterization of missing values in untargeted MS-based metabolomics data and evaluation of missing data handling strategies
Source: PubMed Central journal article supplement (PMC6153696; doi:10.1007/s11306-018-1420-2), 2018-09-20
Supplement: 11306_2018_1420_MOESM2_ESM.pdf [file 11306_2018_1420_MOESM2_ESM.pdf]

# Characterization of missingness in untargeted MS-based metabolomics data sets and evaluation of missing data handling strategies

*Kieu Trinh Do<sup>¶</sup>, Simone Wahl<sup>¶</sup>, Johannes Raffler, Sophie Molnos, Michael Laimighofer, Jerzy Adamski, Karsten Suhre, Konstantin Strauch, Annette Peters, Christian Gieger, Claudia Langenberg, Isobel D. Stewart, Fabian J. Theis, Harald Grallert, Gabi Kastenmüller<sup>#</sup>, Jan Krumsiek<sup>#</sup>*

## Supporting Information File S2: Runday-dependent densities in relation with missingness

The distribution of each metabolite is shown before (top panel) and after runday normalization (bottom panel). Runday normalization was performed with runday median. The colors of the distributions correspond to the amount of missing values in the respective runday.

# 1-arachidonoylglycerophosphocholine\*

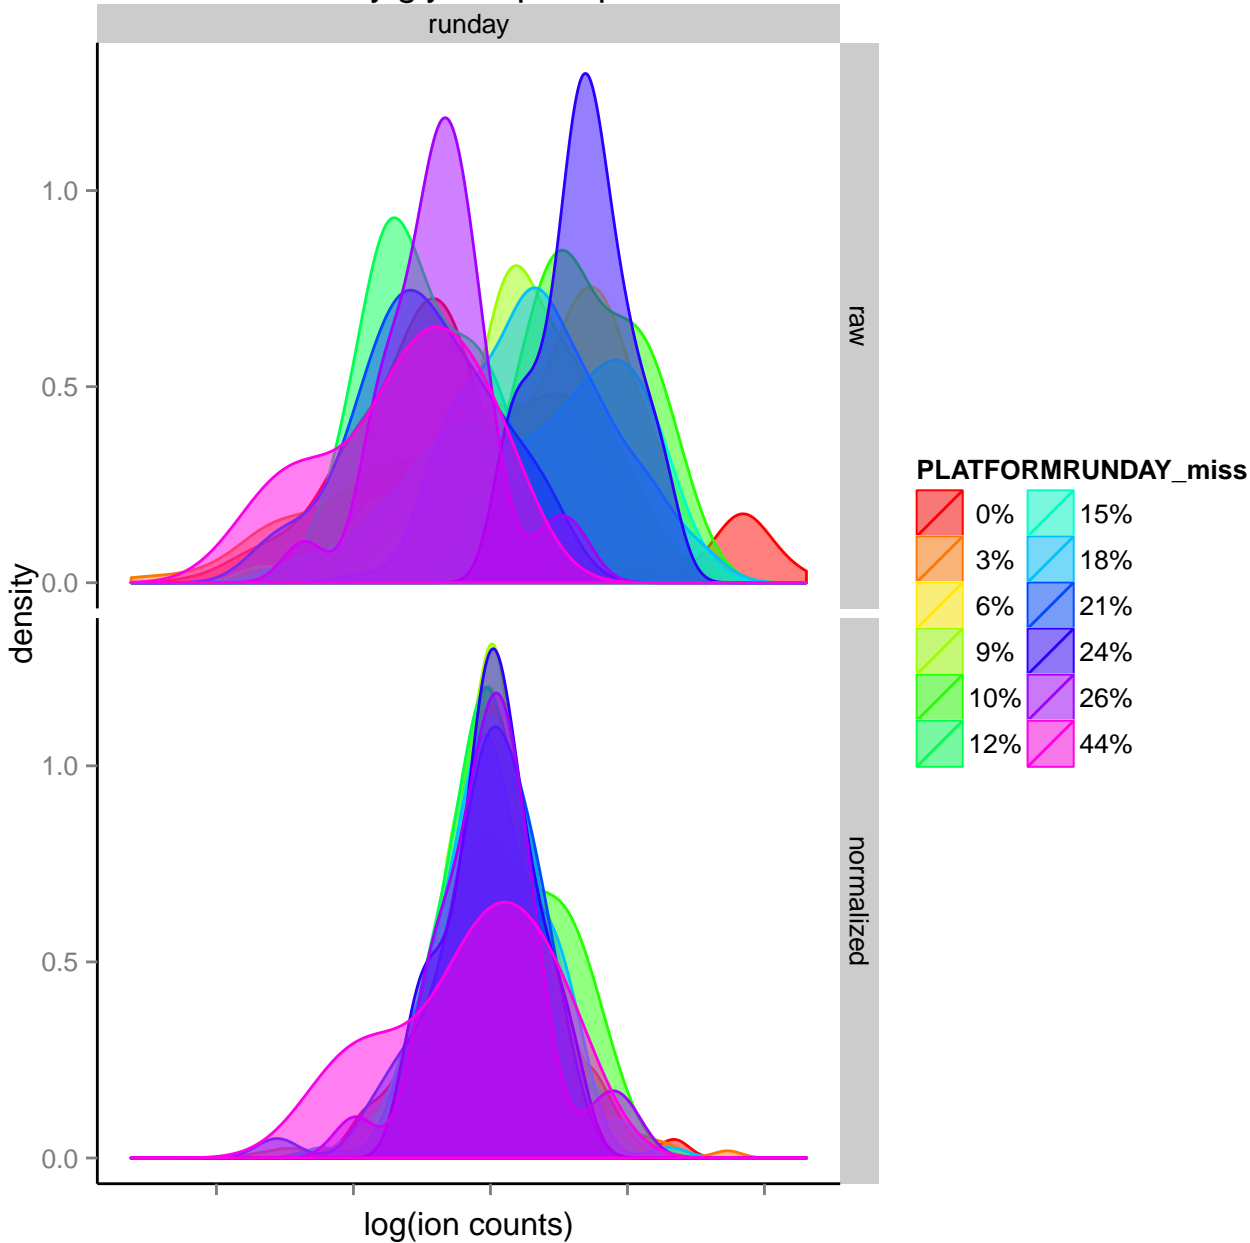

# 1-arachidonoylglycerophosphoethanolamine\*

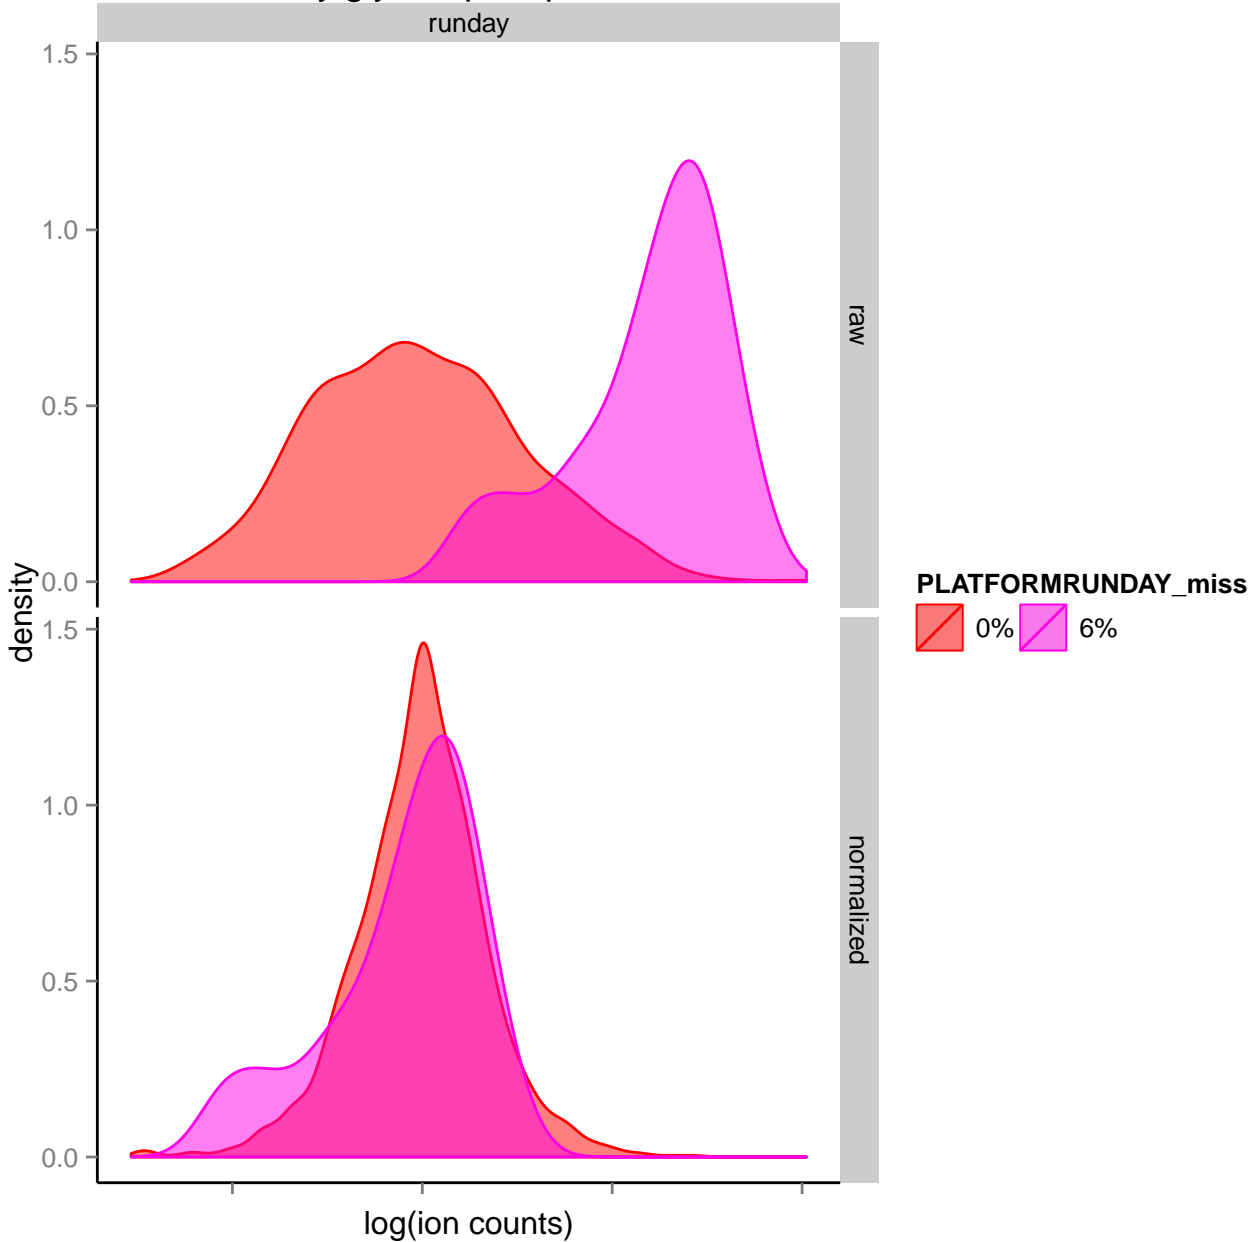

# 1-arachidonoylglycerophosphoinositol\*

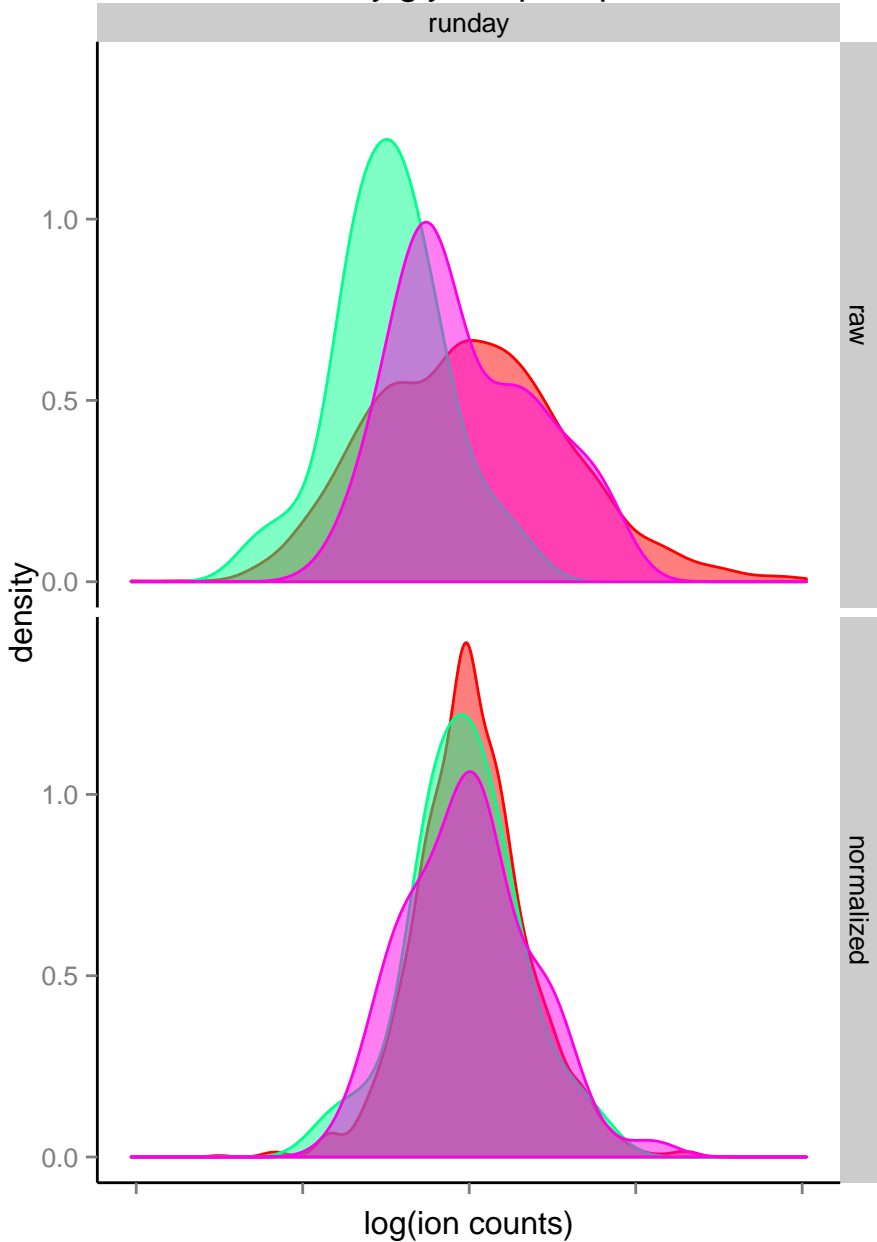

## PLATFORMRUNDAY\_miss

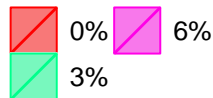



# 1-docosahexaenoylglycerophosphocholine\*

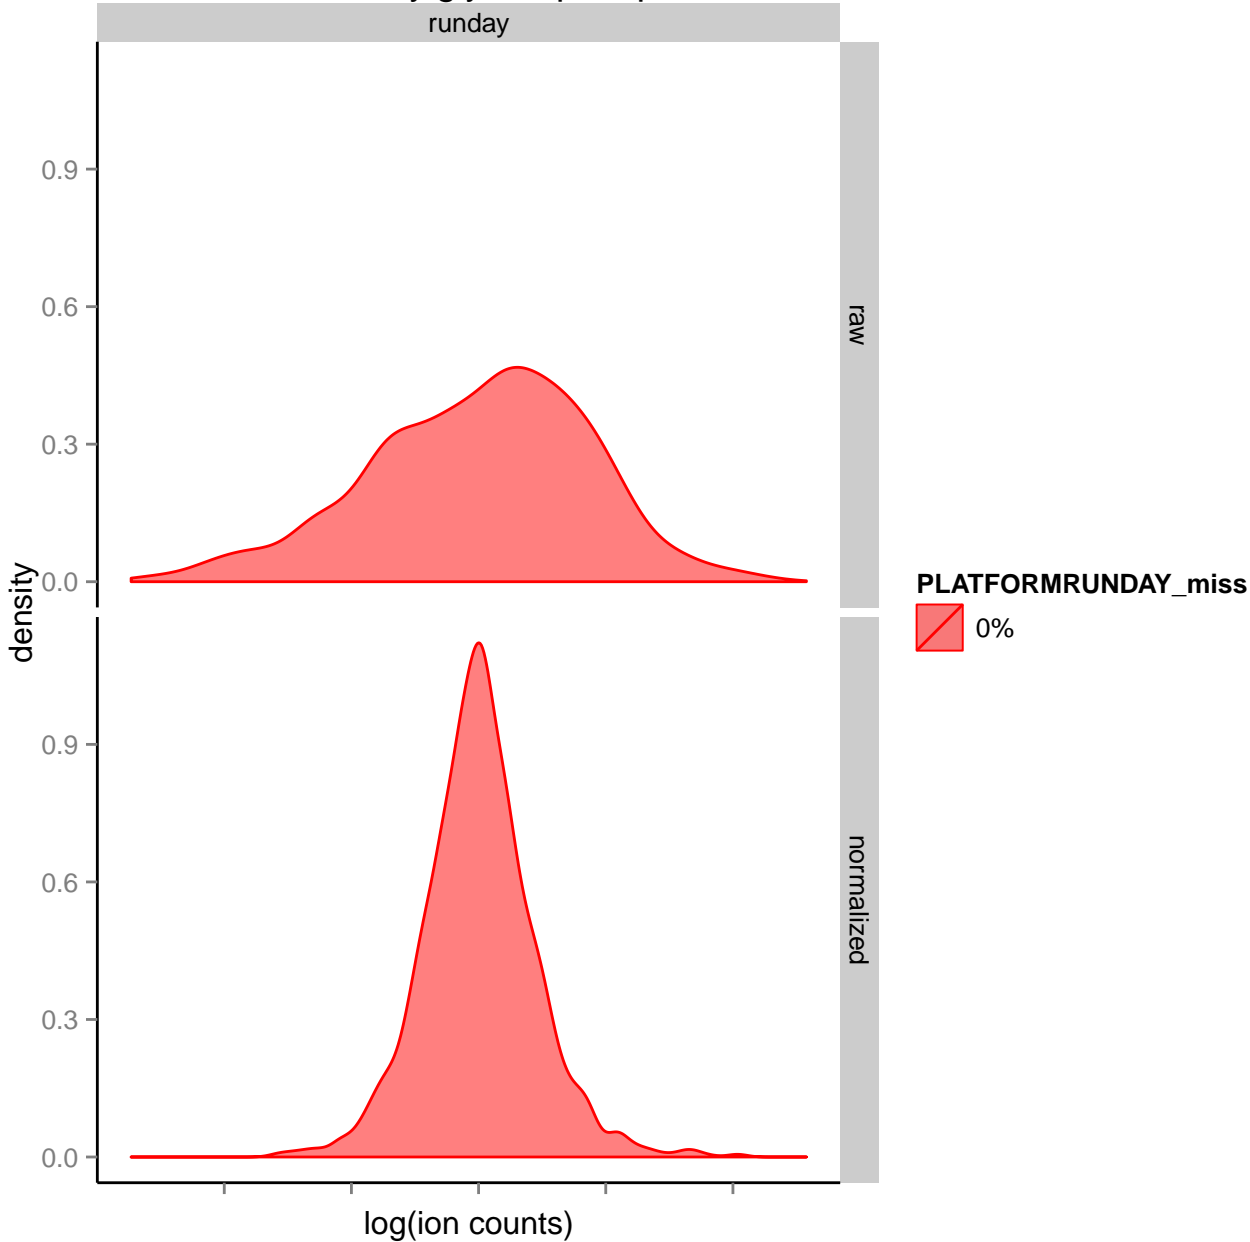

# 1-eicosadienoylglycerophosphocholine\*

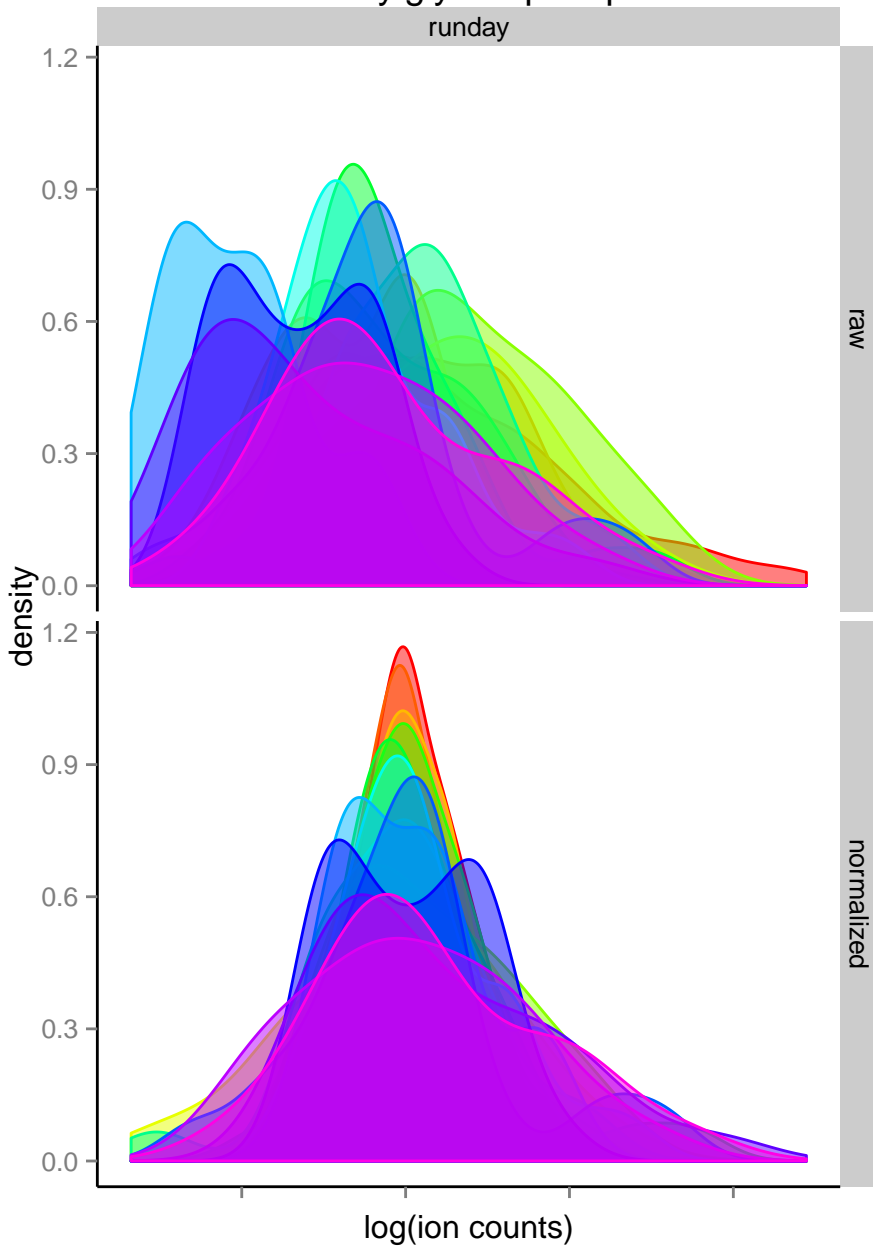

## PLATFORMRUNDAY\_miss

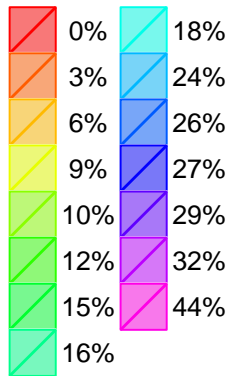

# 1-eicosatrienoylglycerophosphocholine\*

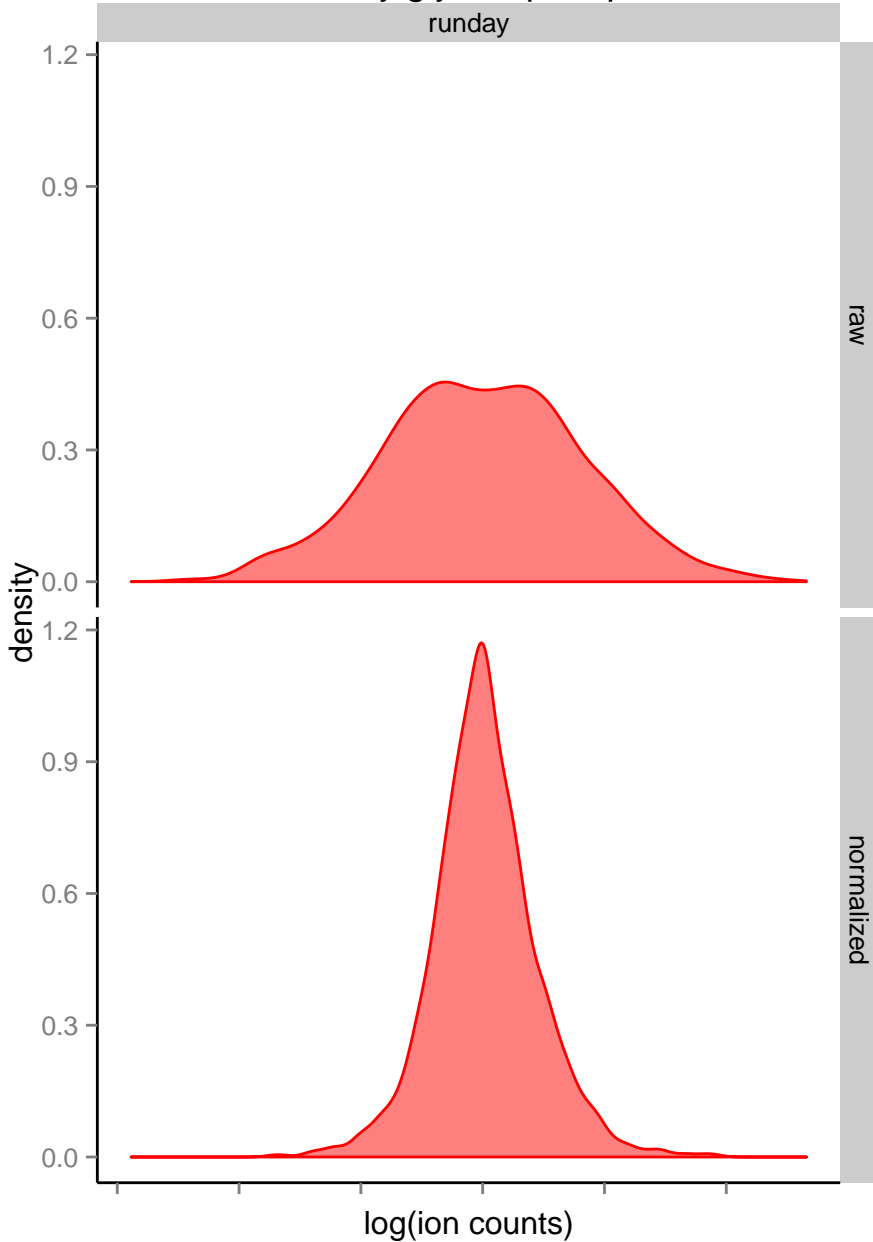

PLATFORMRUNDAY\_miss

0%

# 1-heptadecanoylglycerophosphocholine

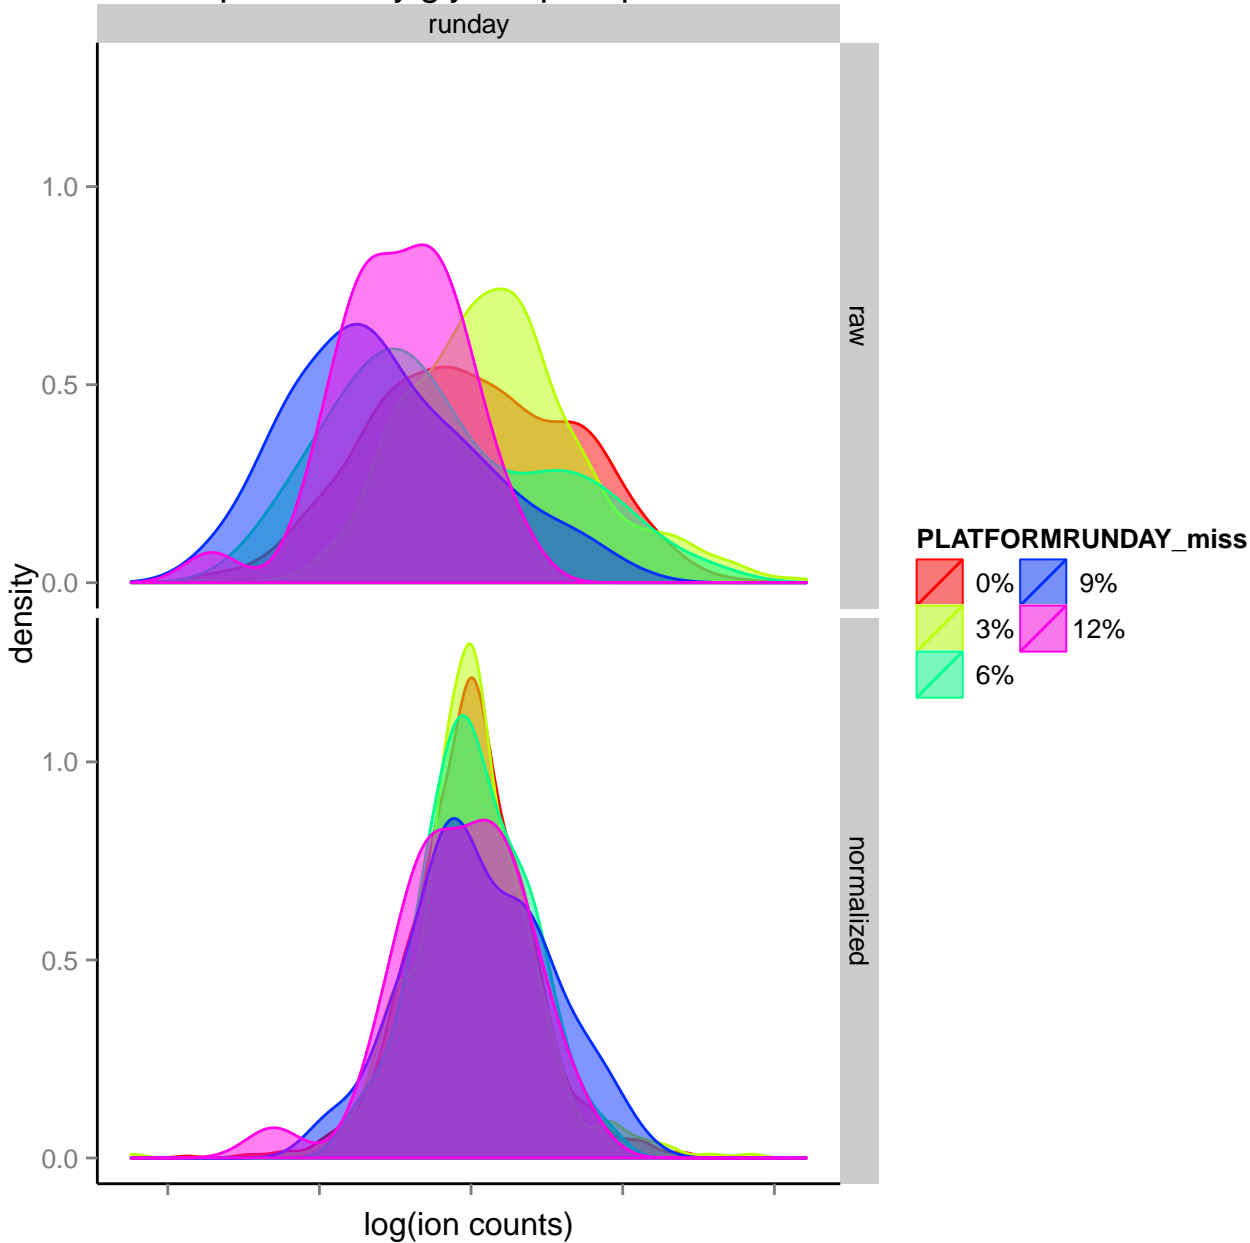

# 1-linoleoylglycerol (1-monolinolein)

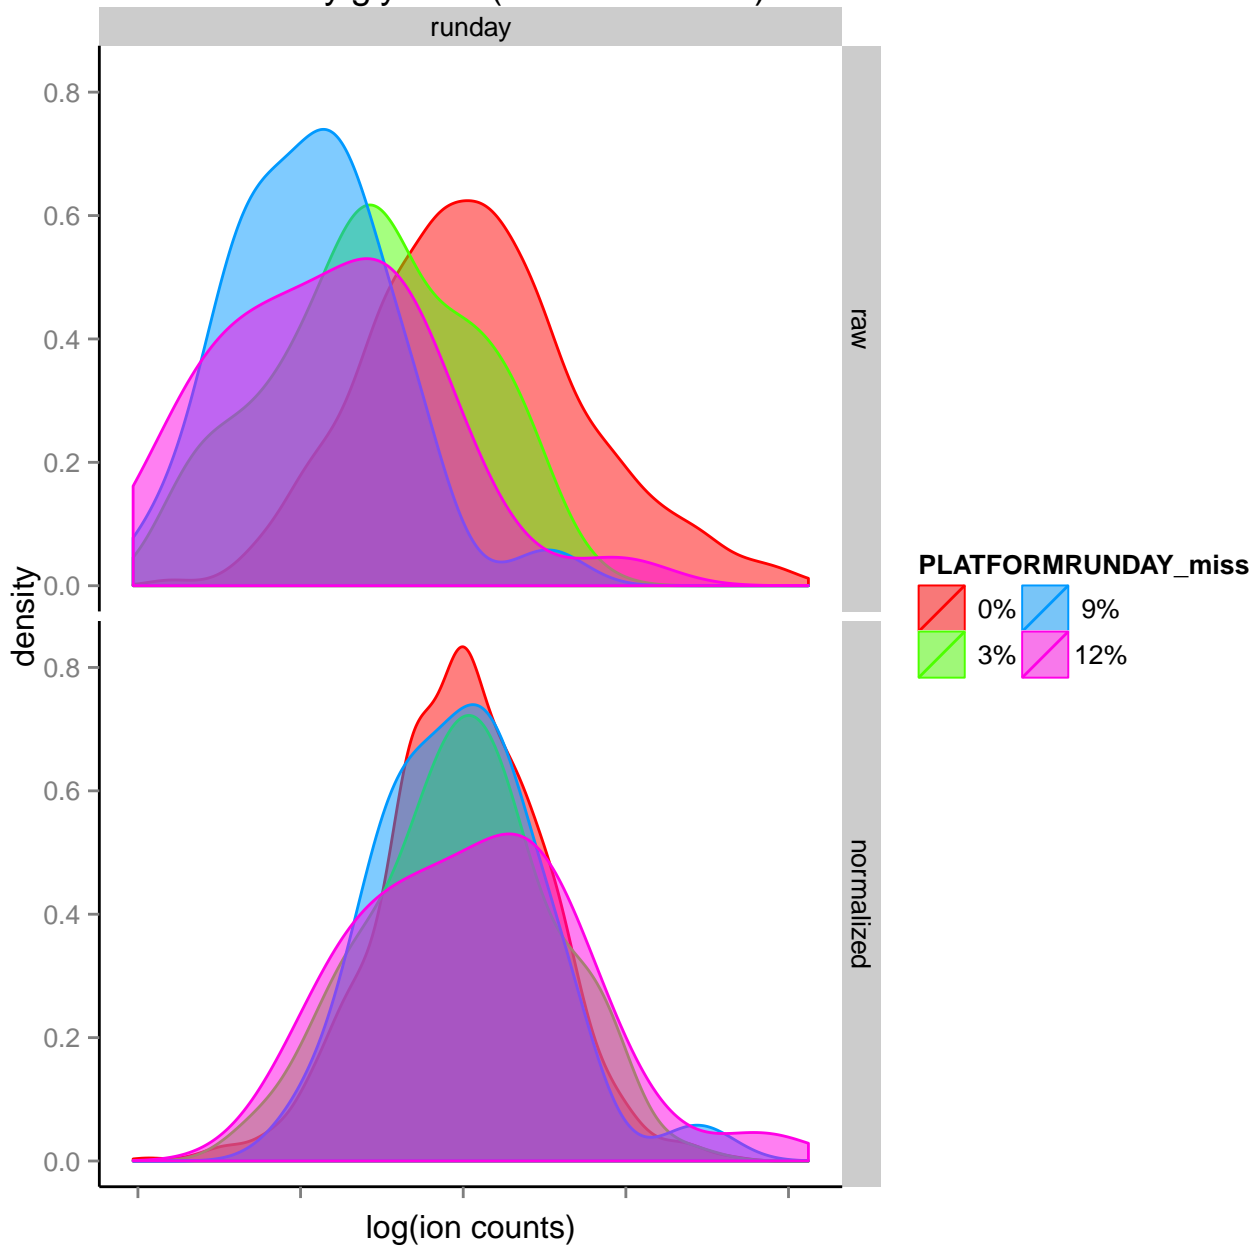

# 1-linoleoylglycerophosphocholine

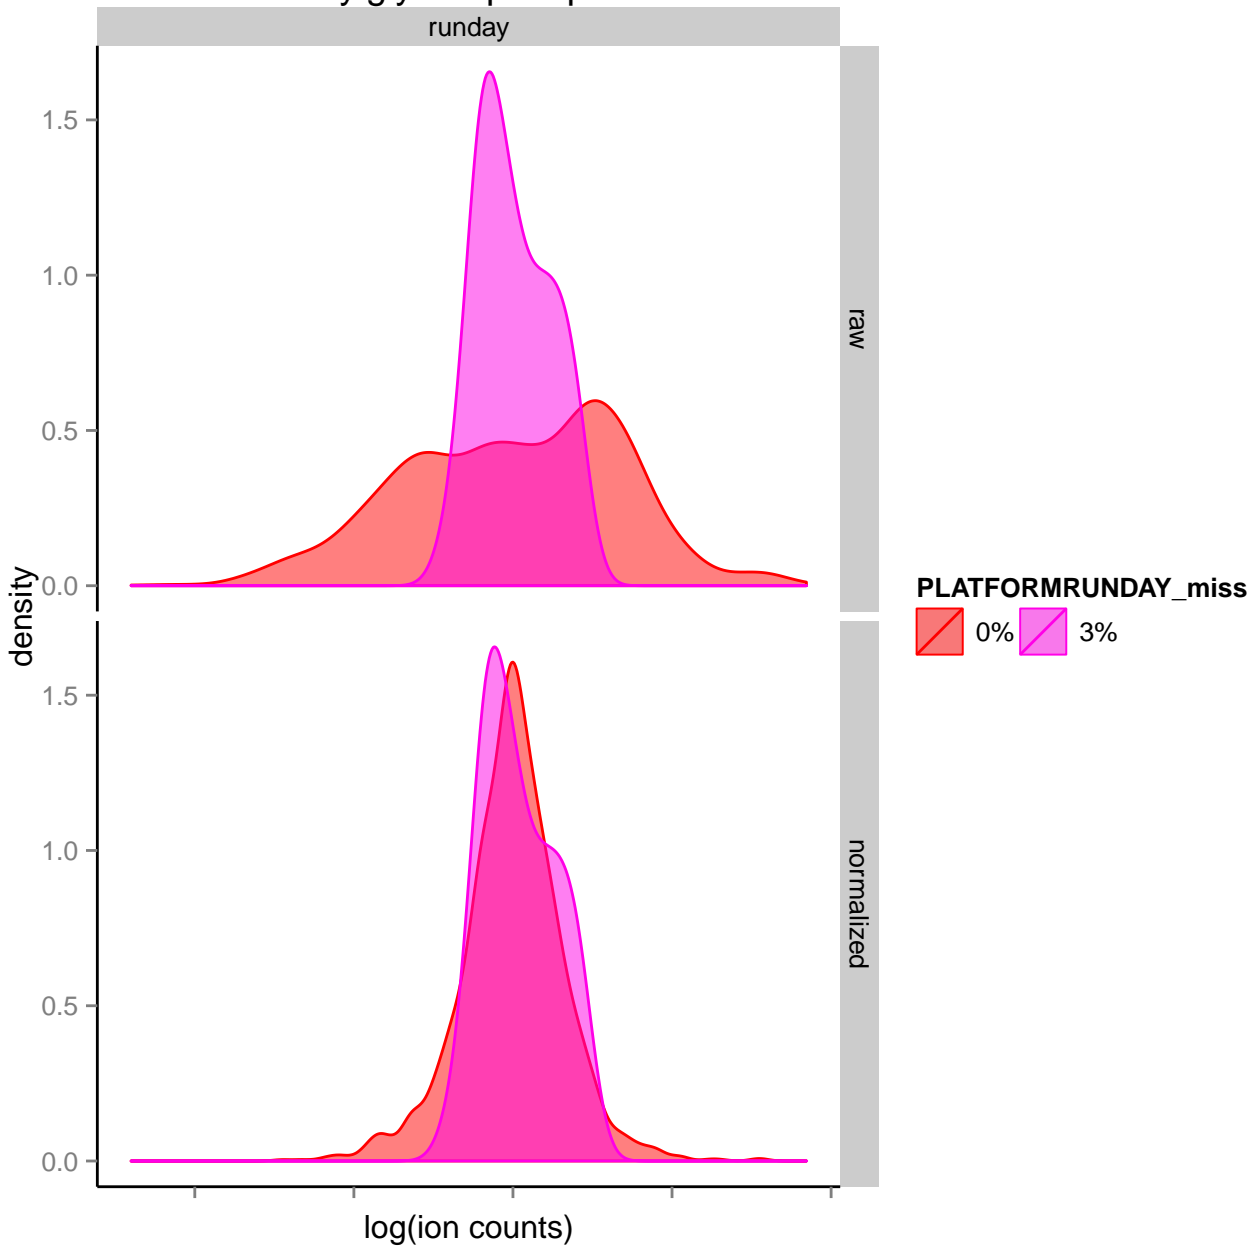

# 1-linoleoylglycerophosphoethanolamine\*

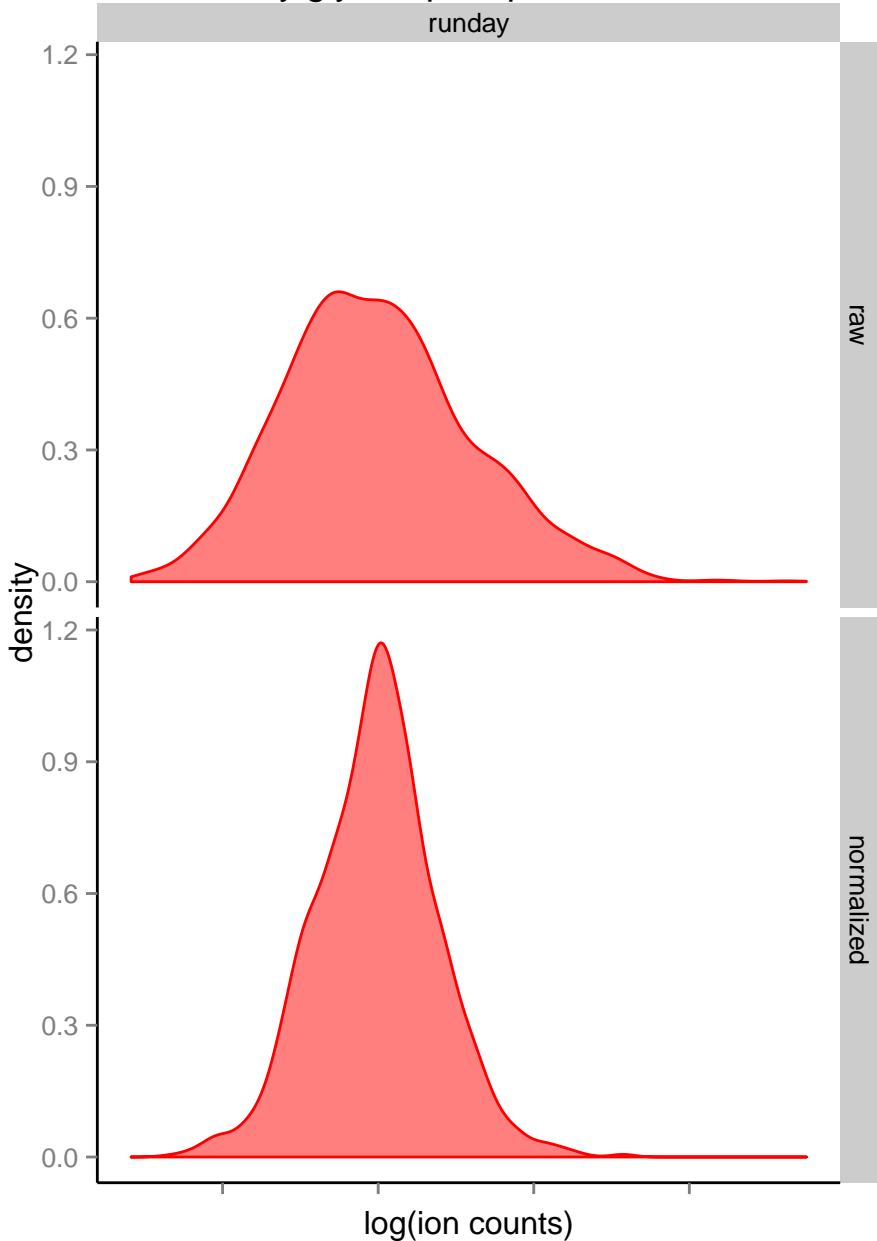

**PLATFORMRUNDAY\_miss**

0%

# 1-methylurate

runday

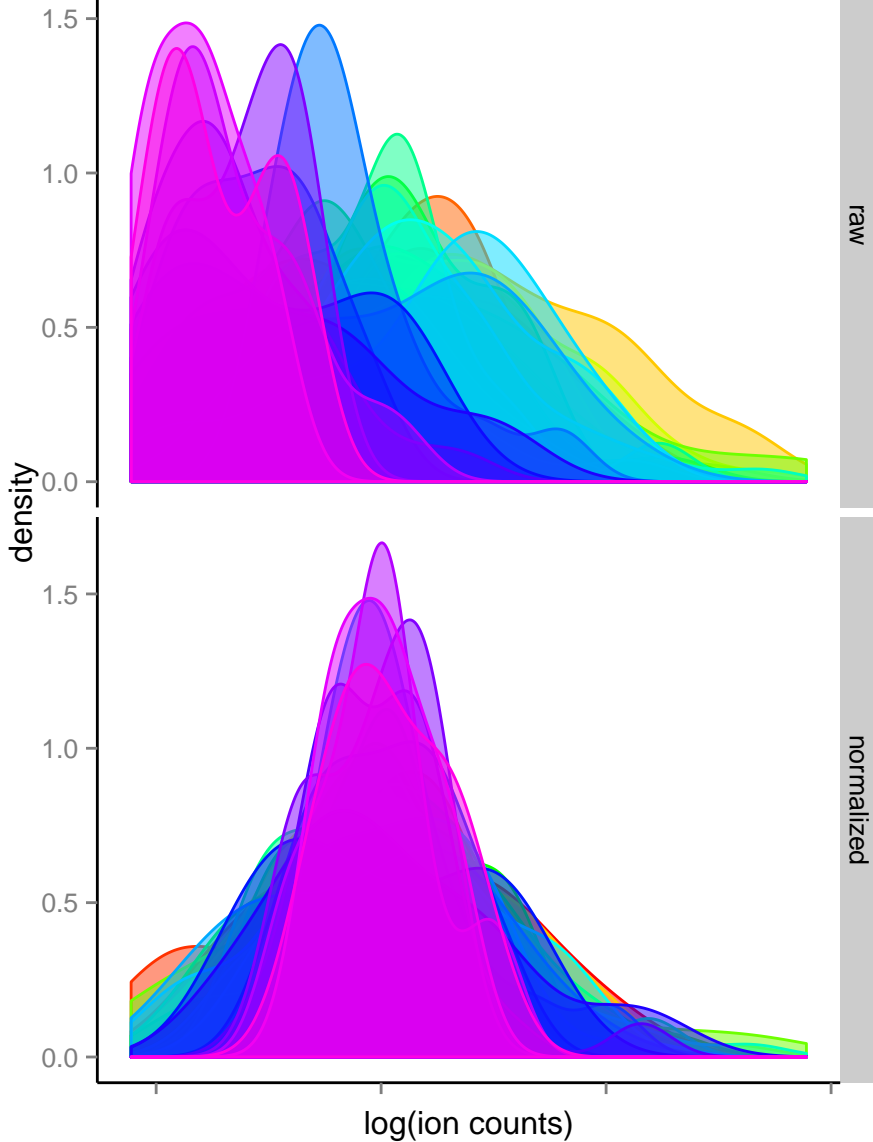

## PLATFORMRUNDAY\_miss

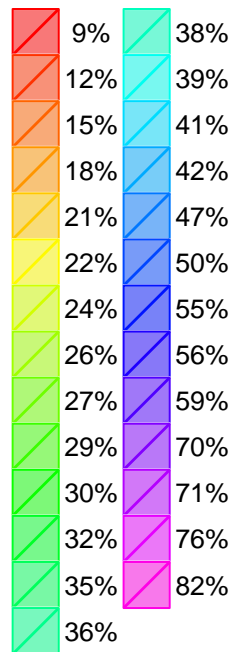



# 1-methylxanthine

runday

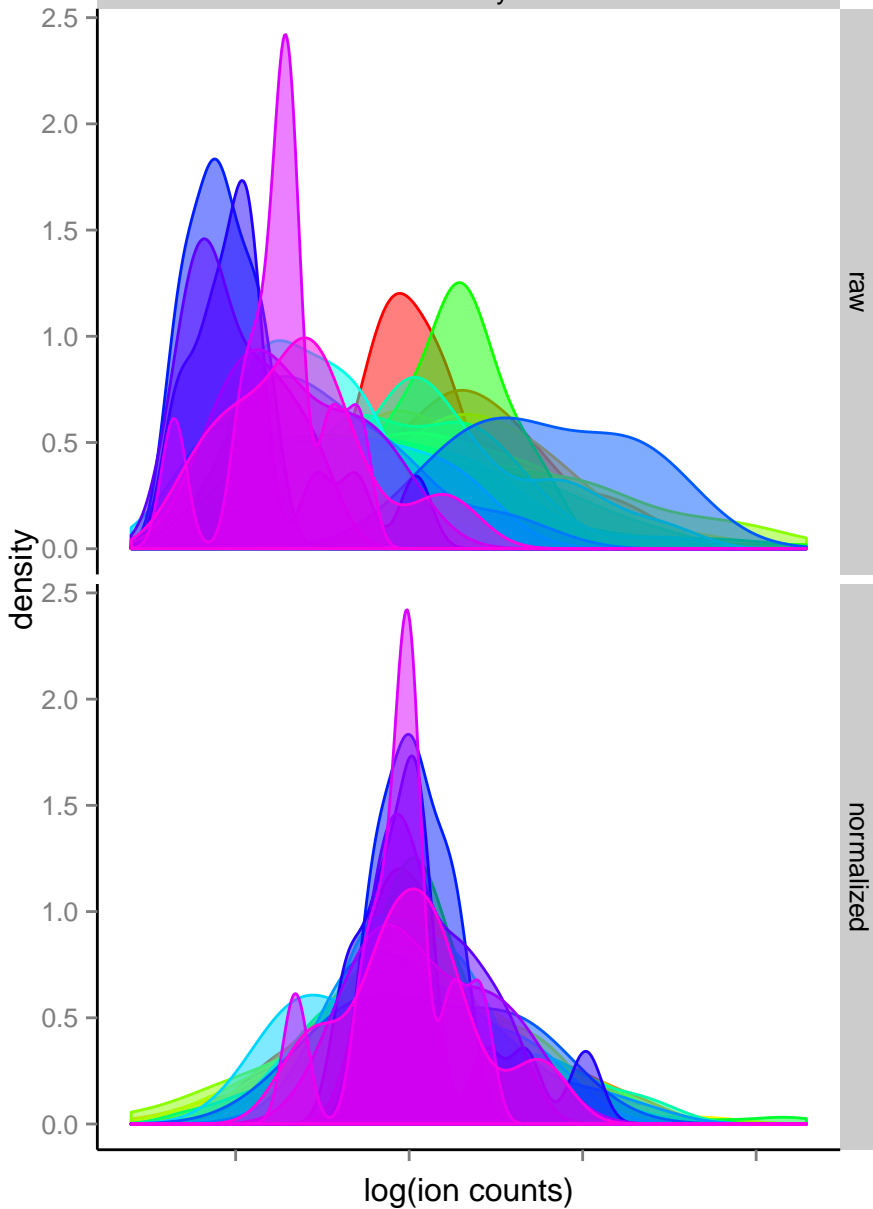

## PLATFORMRUNDAY\_miss

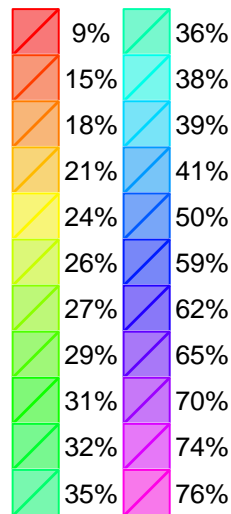

# 1-myristoylglycerophosphocholine

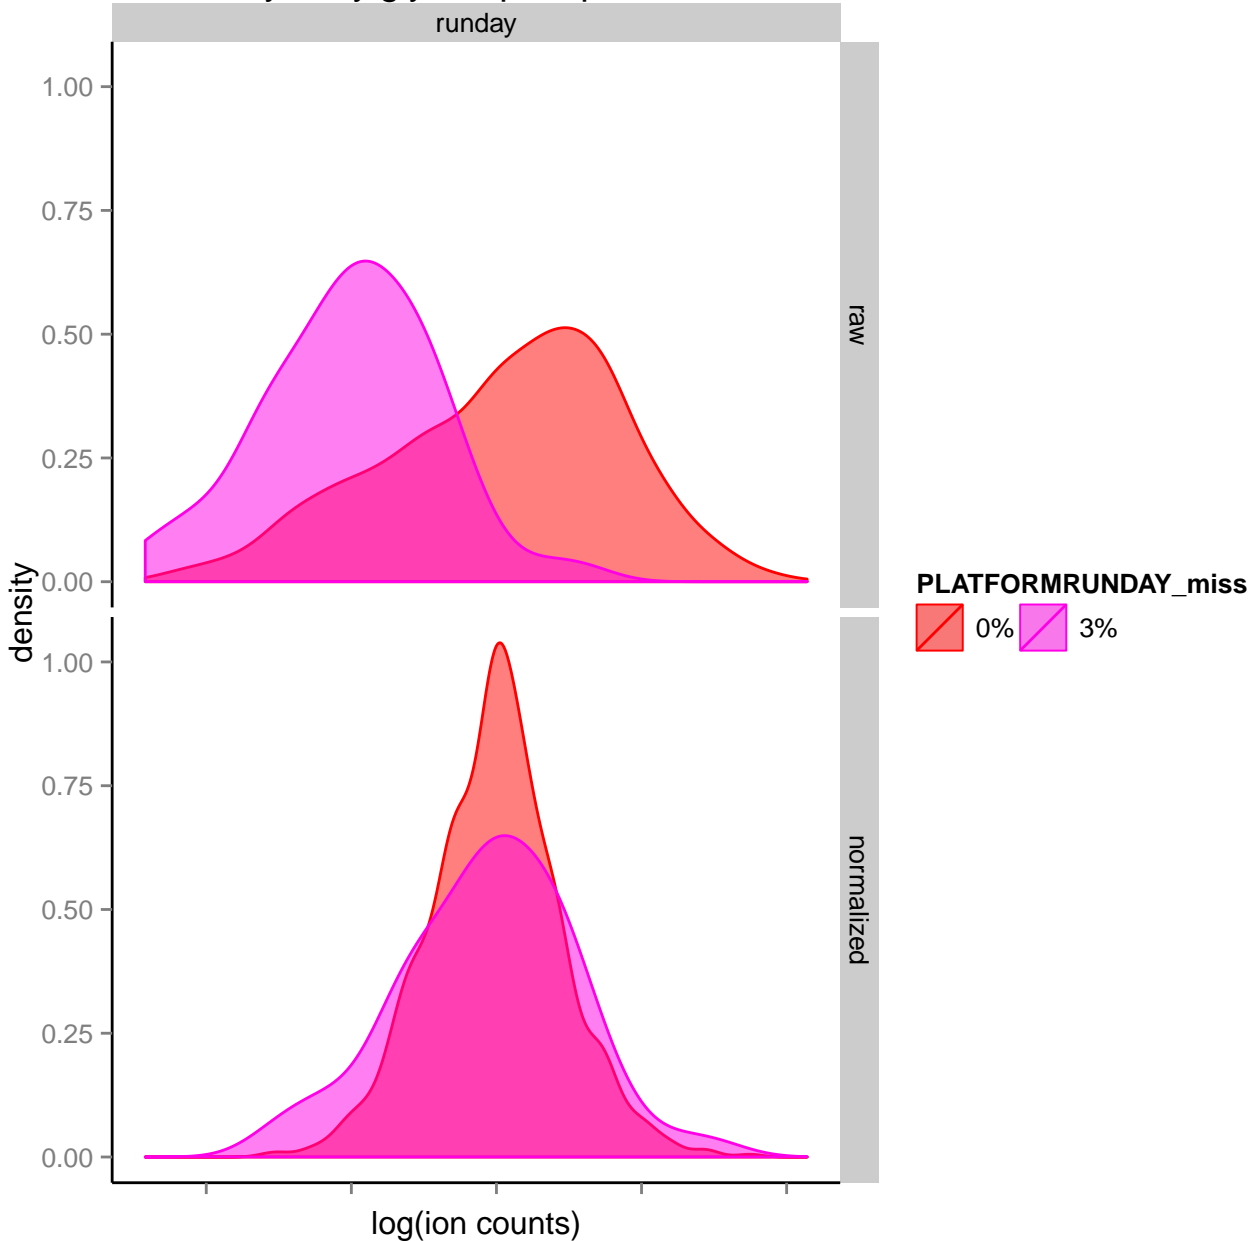

# 1-oleoylglycerol (1-monoolein)

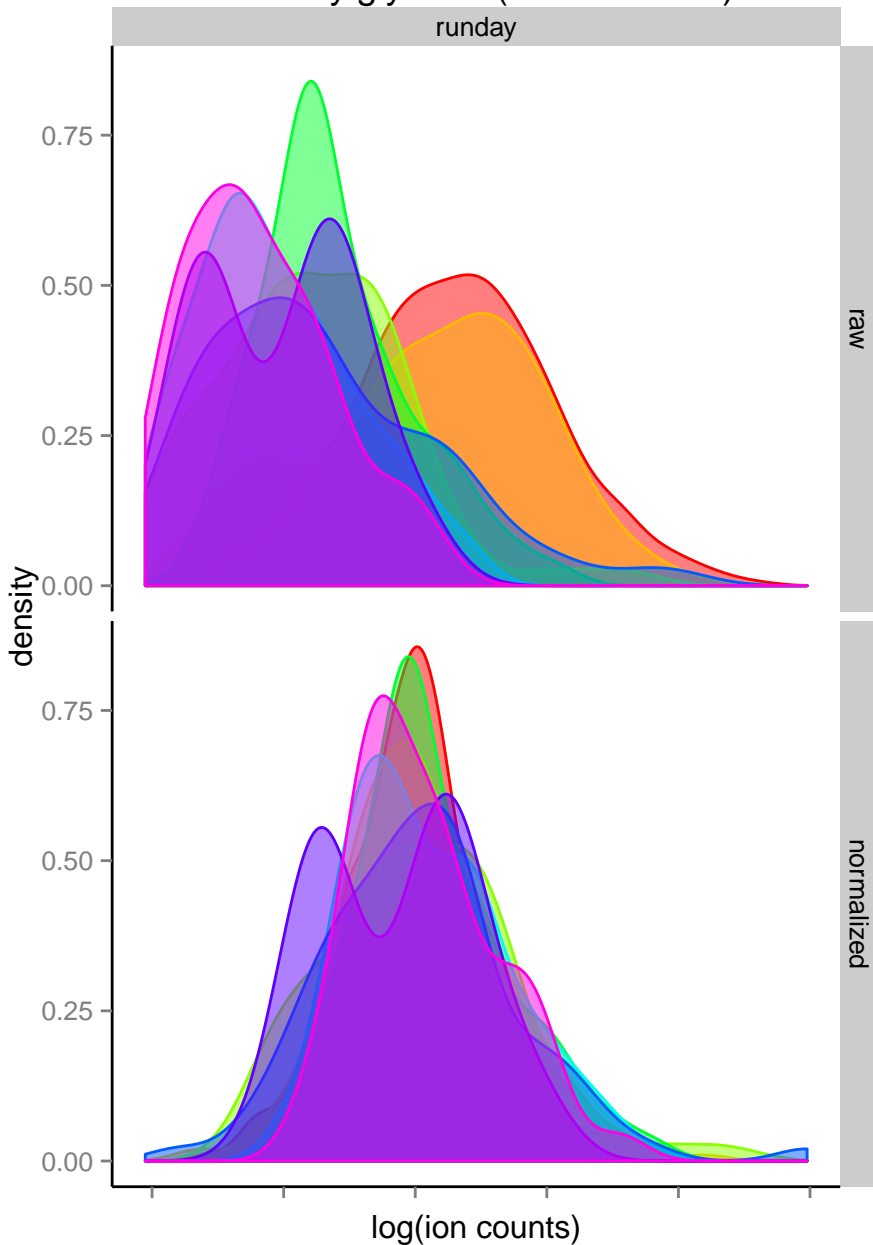

# 1-oleoylglycerophosphocholine

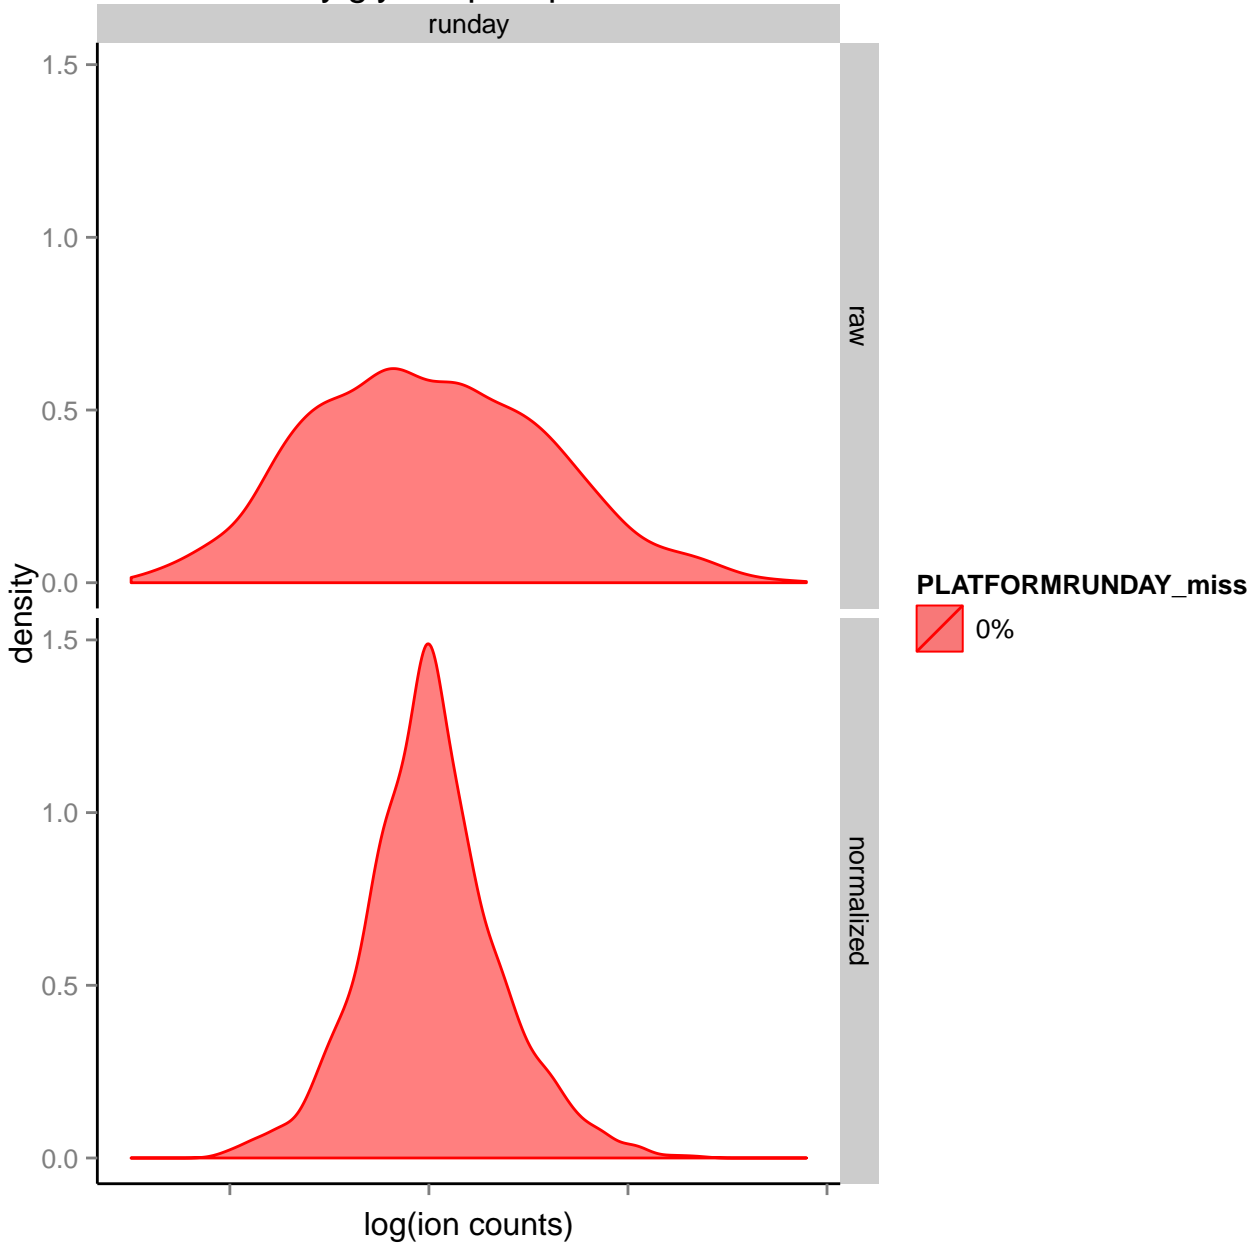

# 1-oleoylglycerophosphoethanolamine

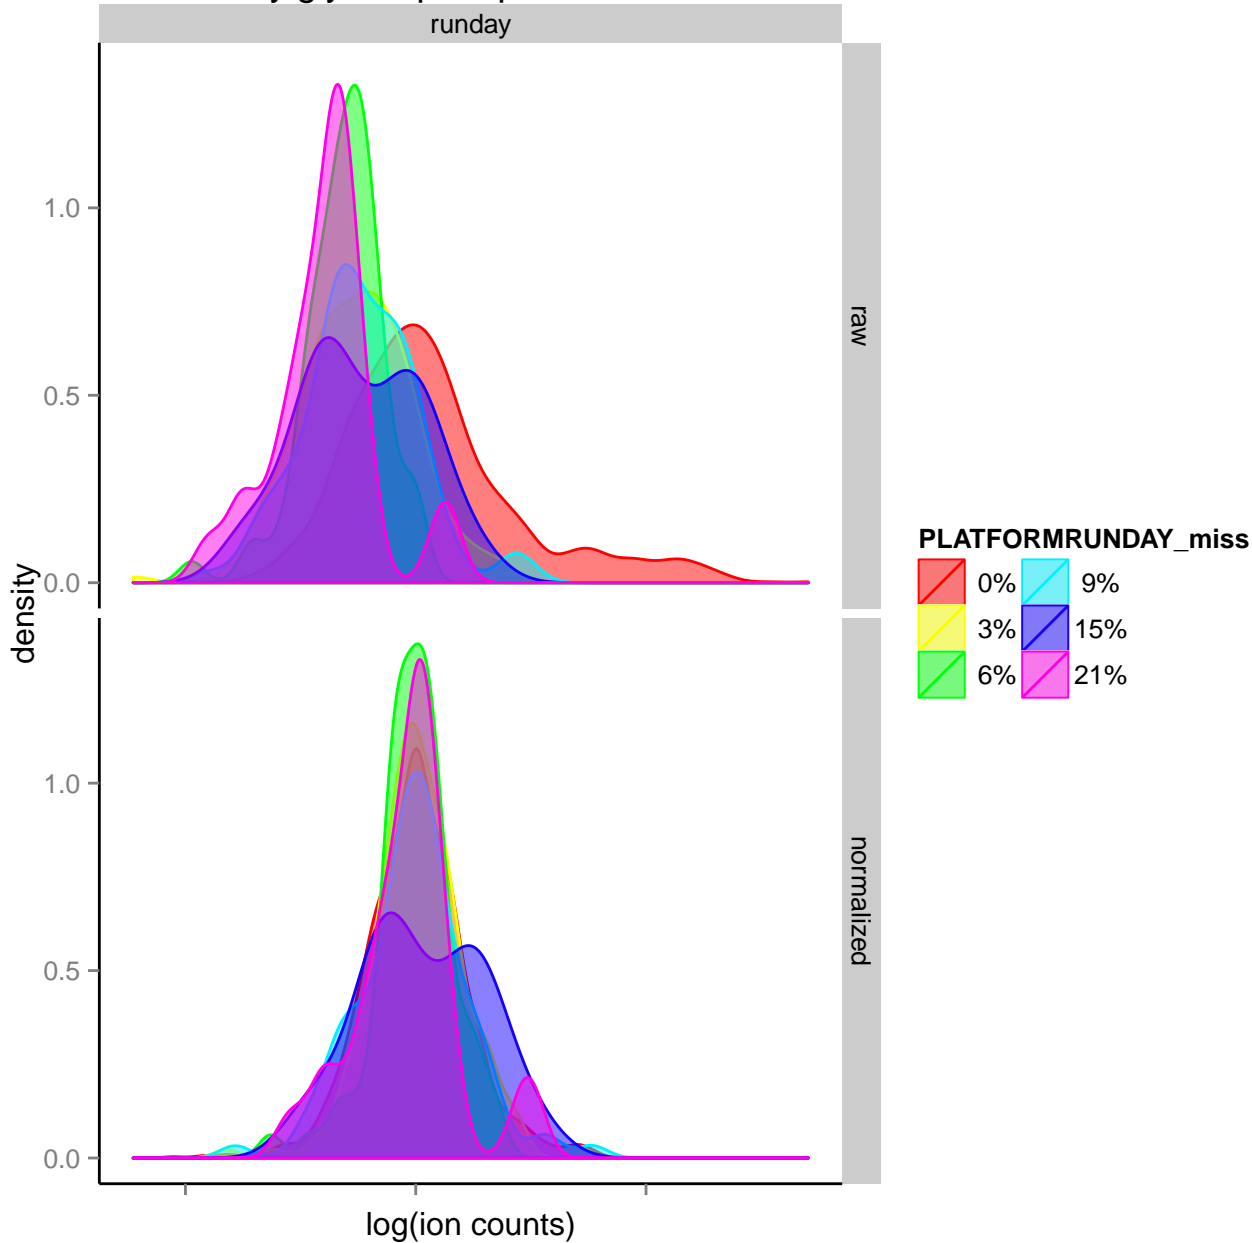

# 1-palmitoleoylglycerophosphocholine\*

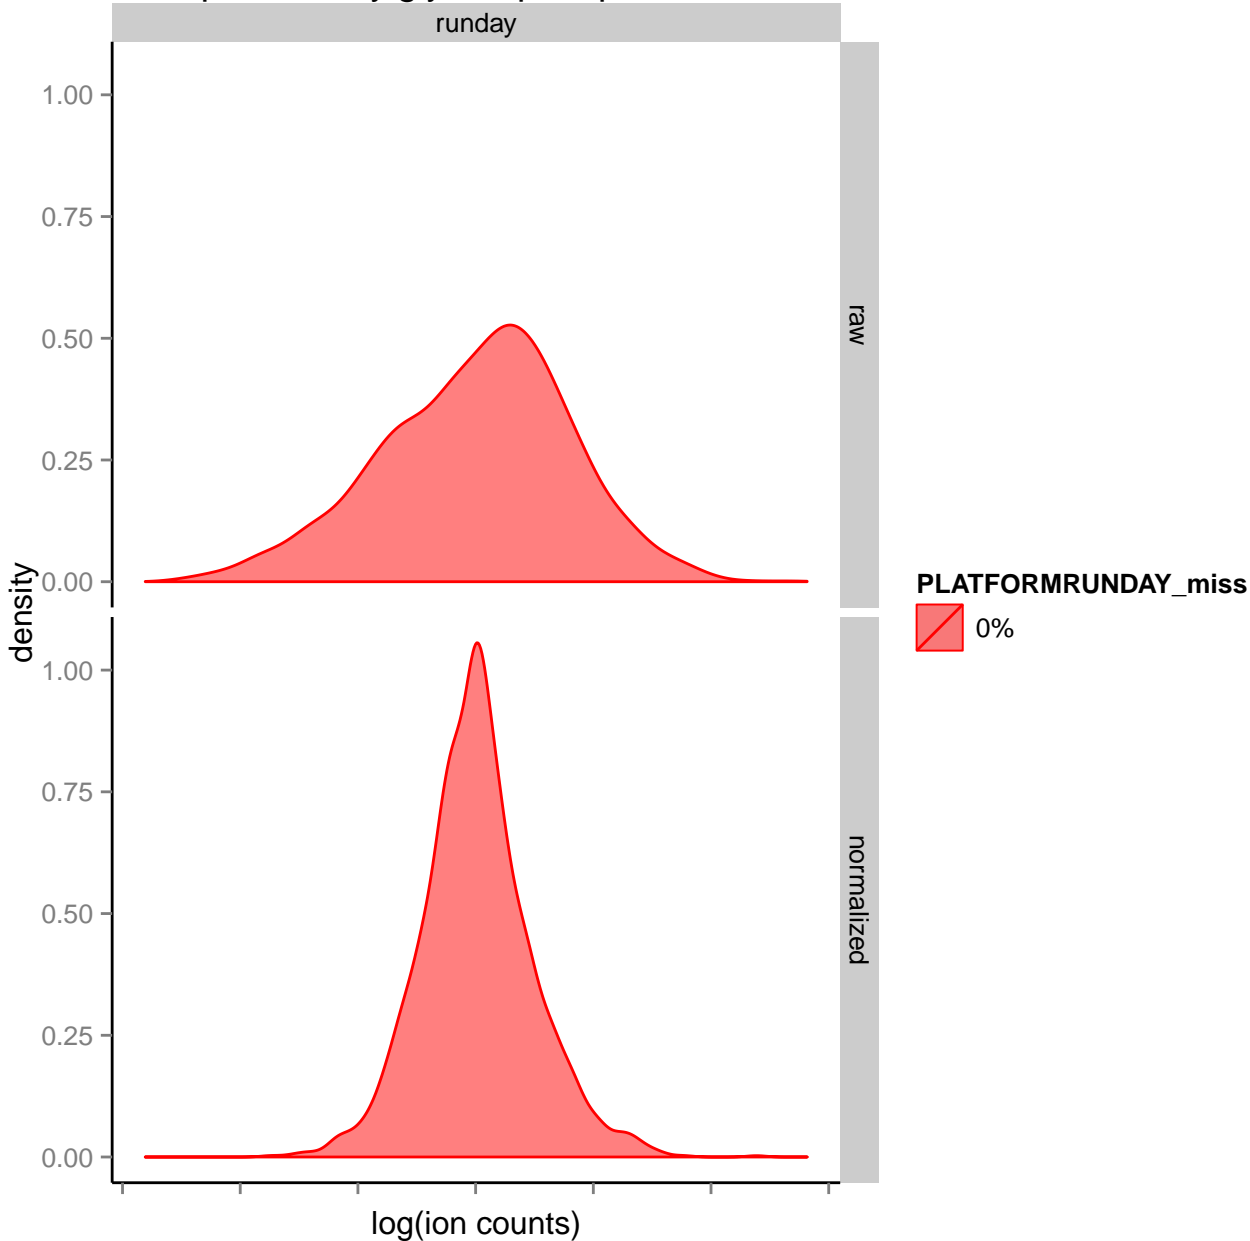

# 1-palmitoylglycerol (1-monopalmitin)

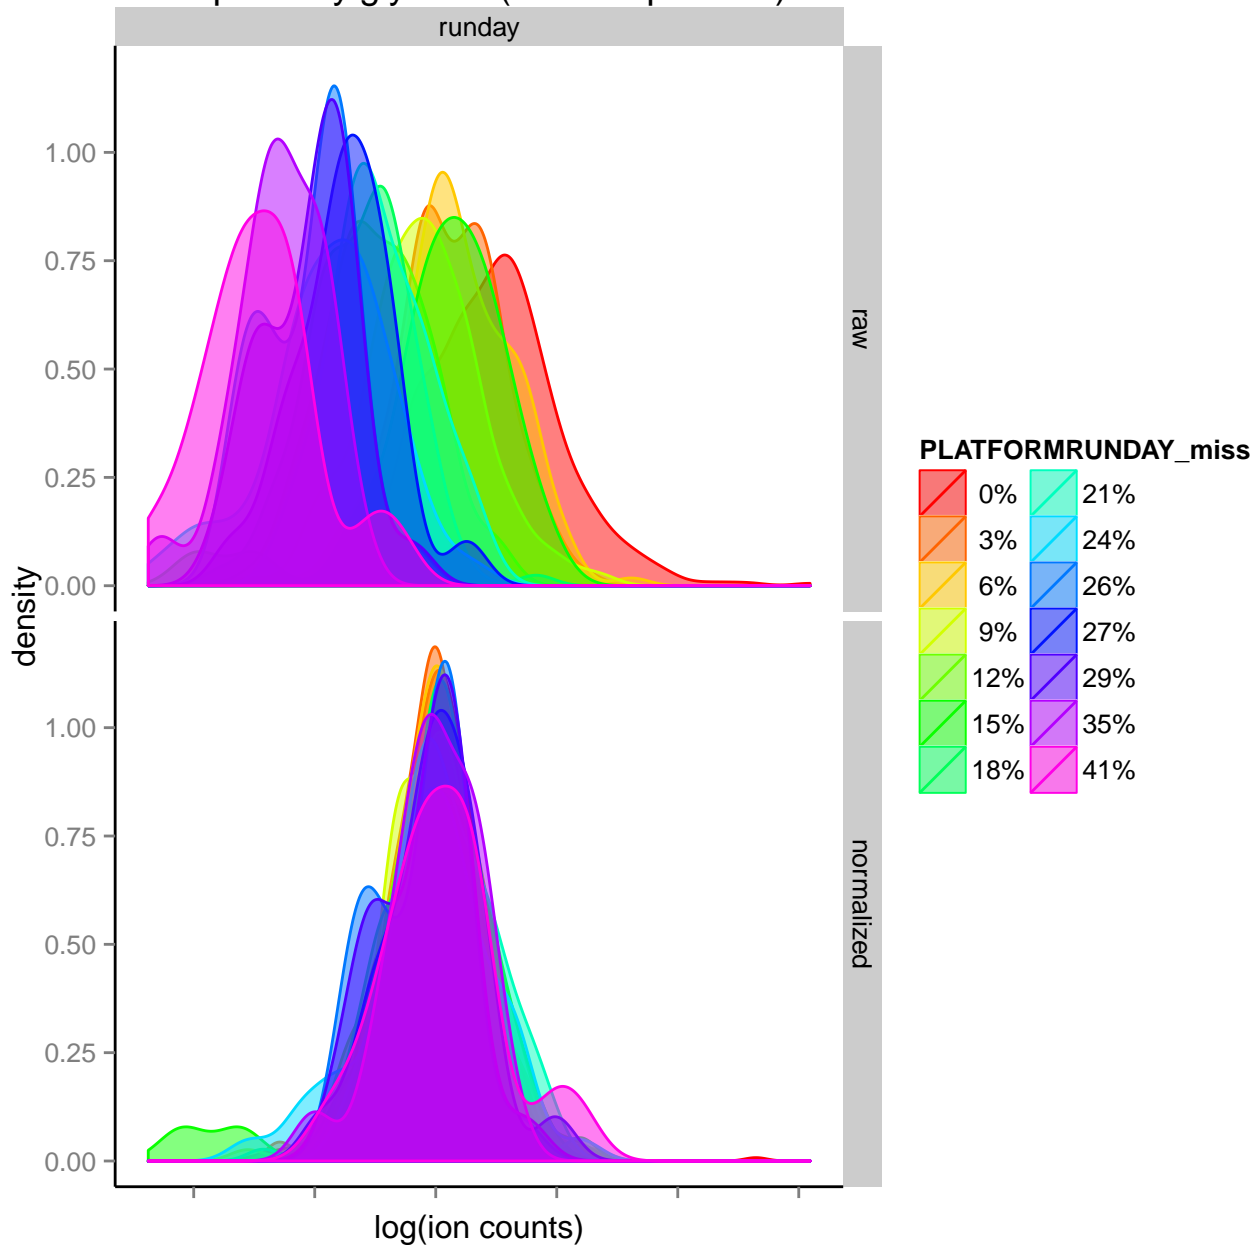

# 1-palmitoylglycerophosphocholine

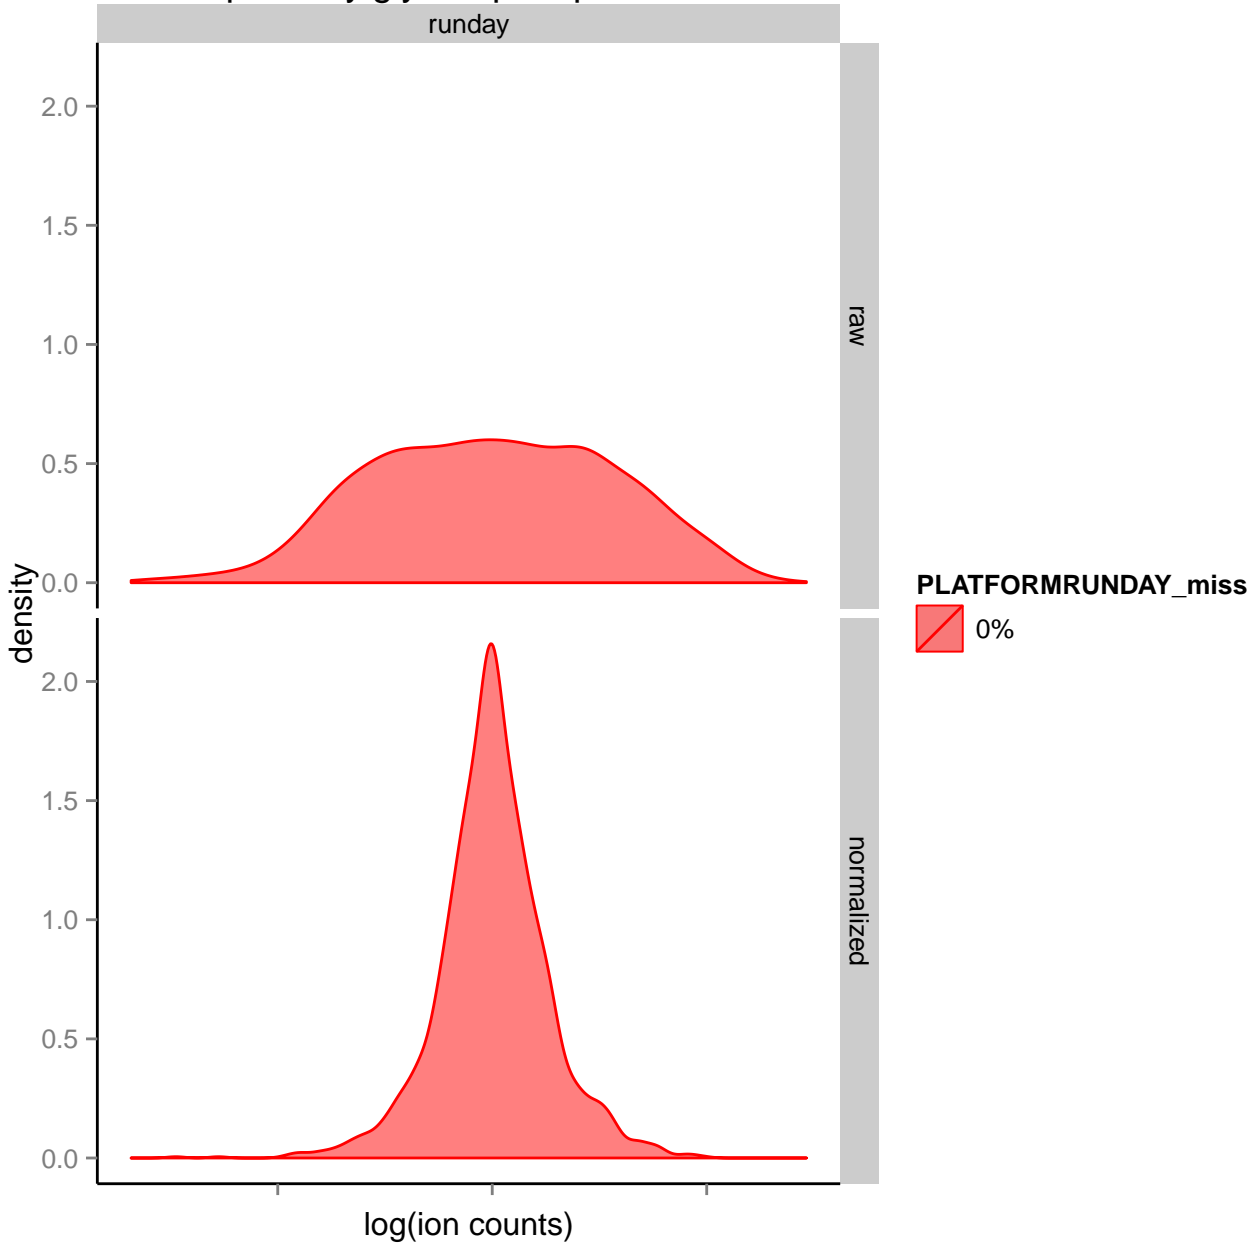



# 1-palmitoylglycerophosphoethanolamine

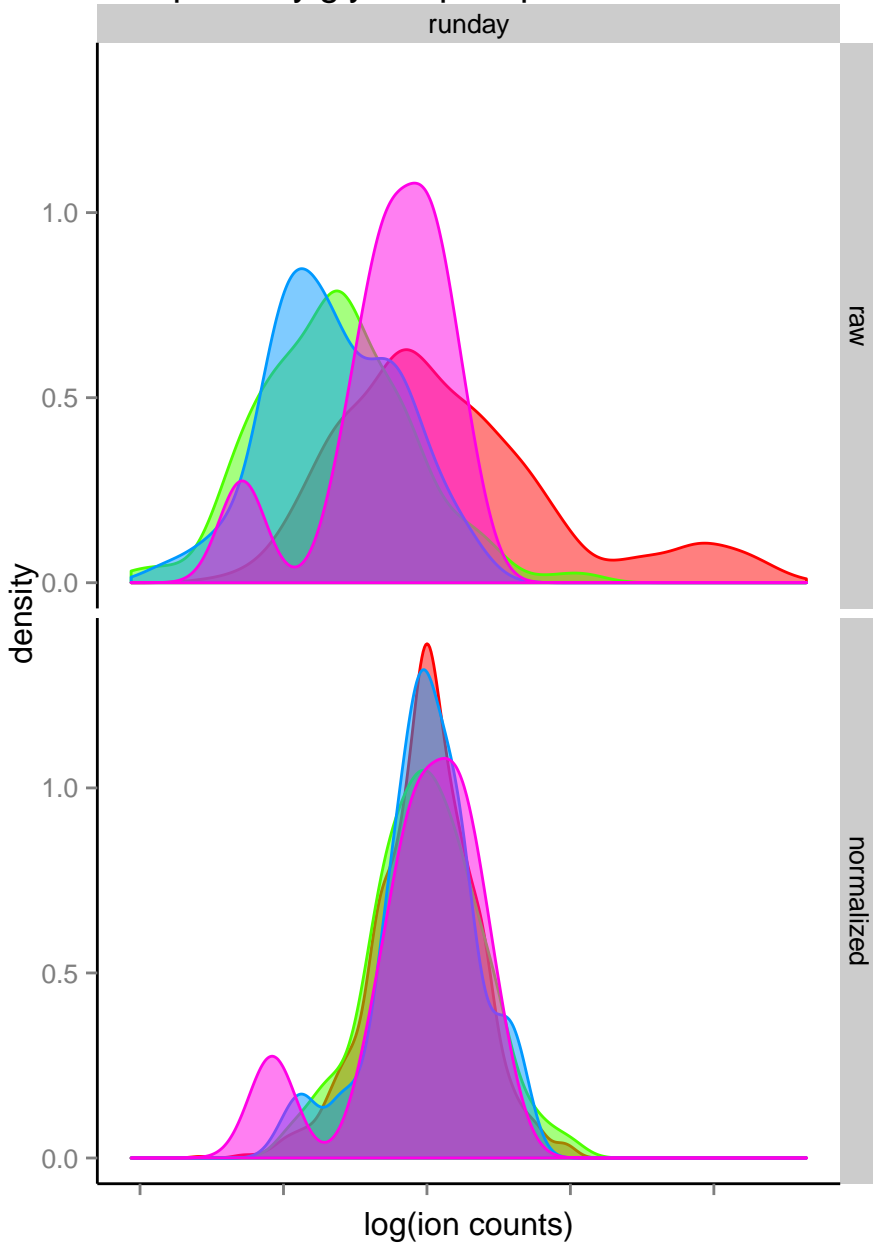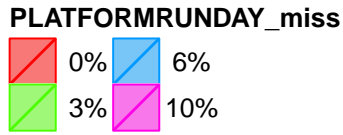

# 1-palmitoylglycerophosphoinositol\*

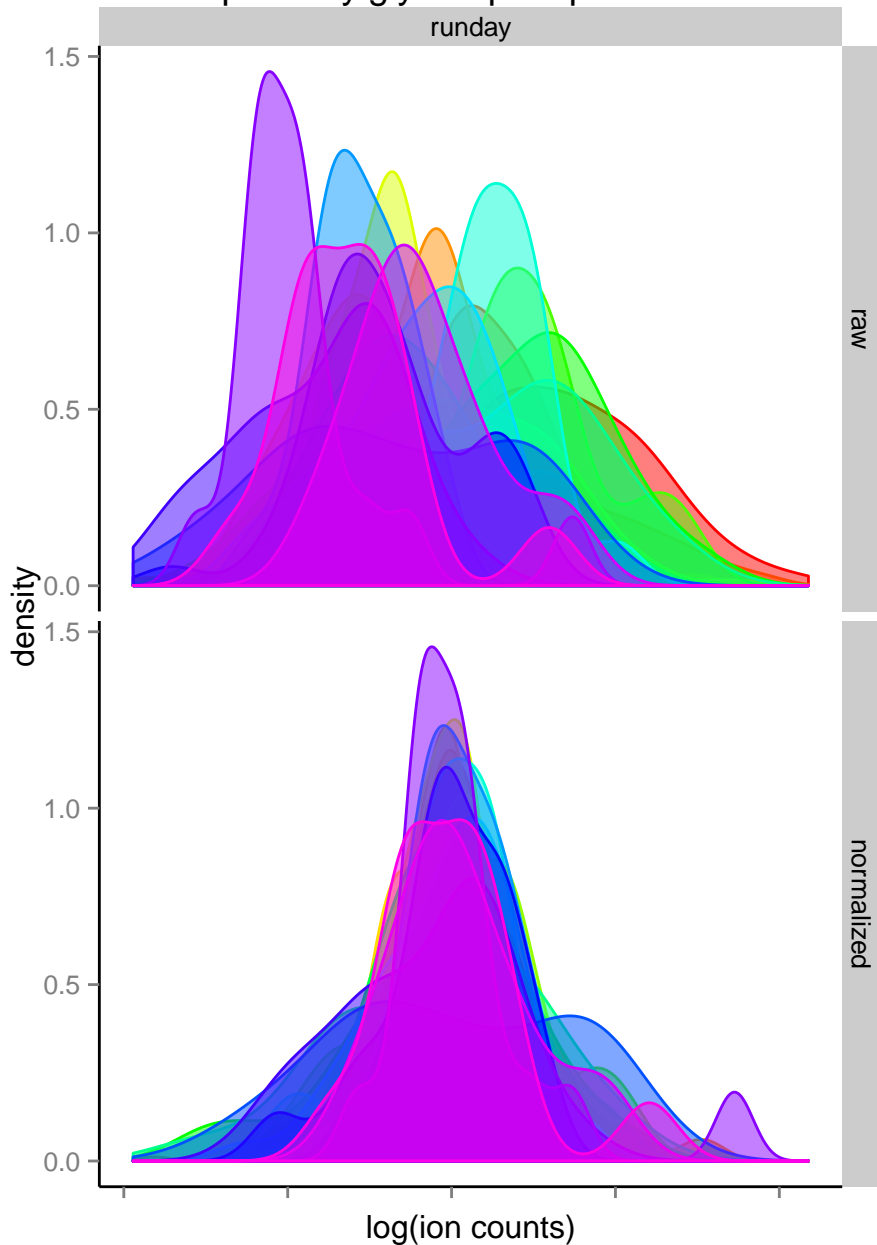

## PLATFORMRUNDAY\_miss

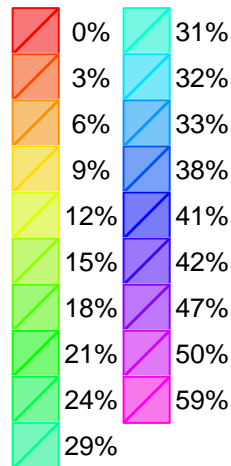

# 1-stearoylglycerol (1-monostearin)

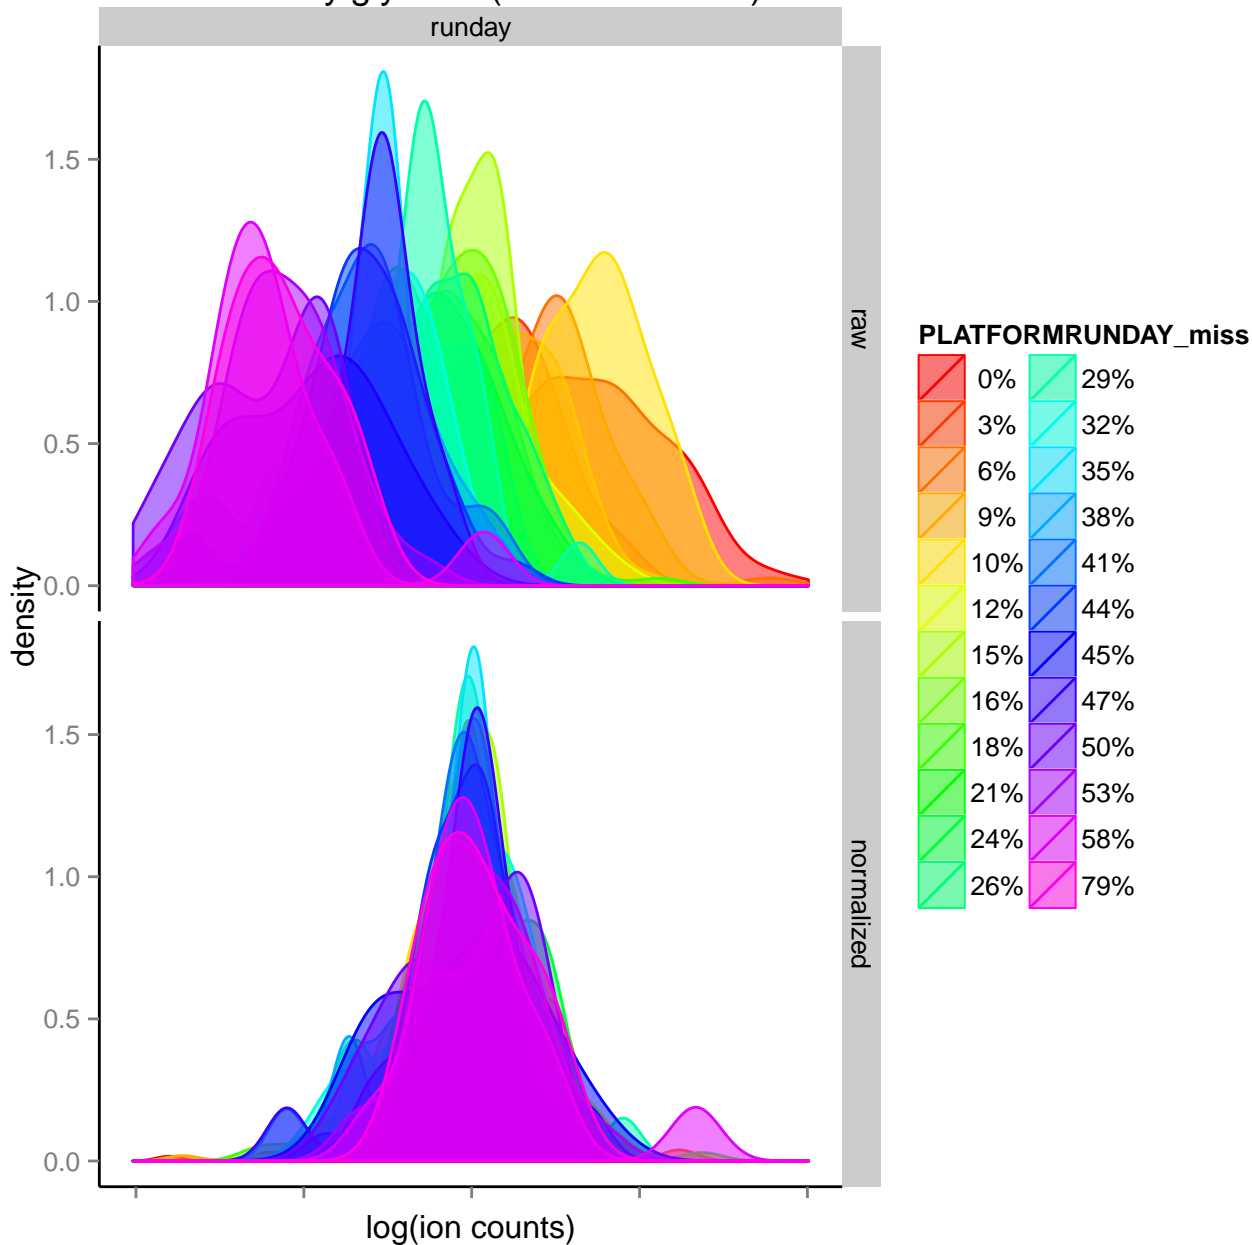

# 1-stearoylglycerophosphocholine

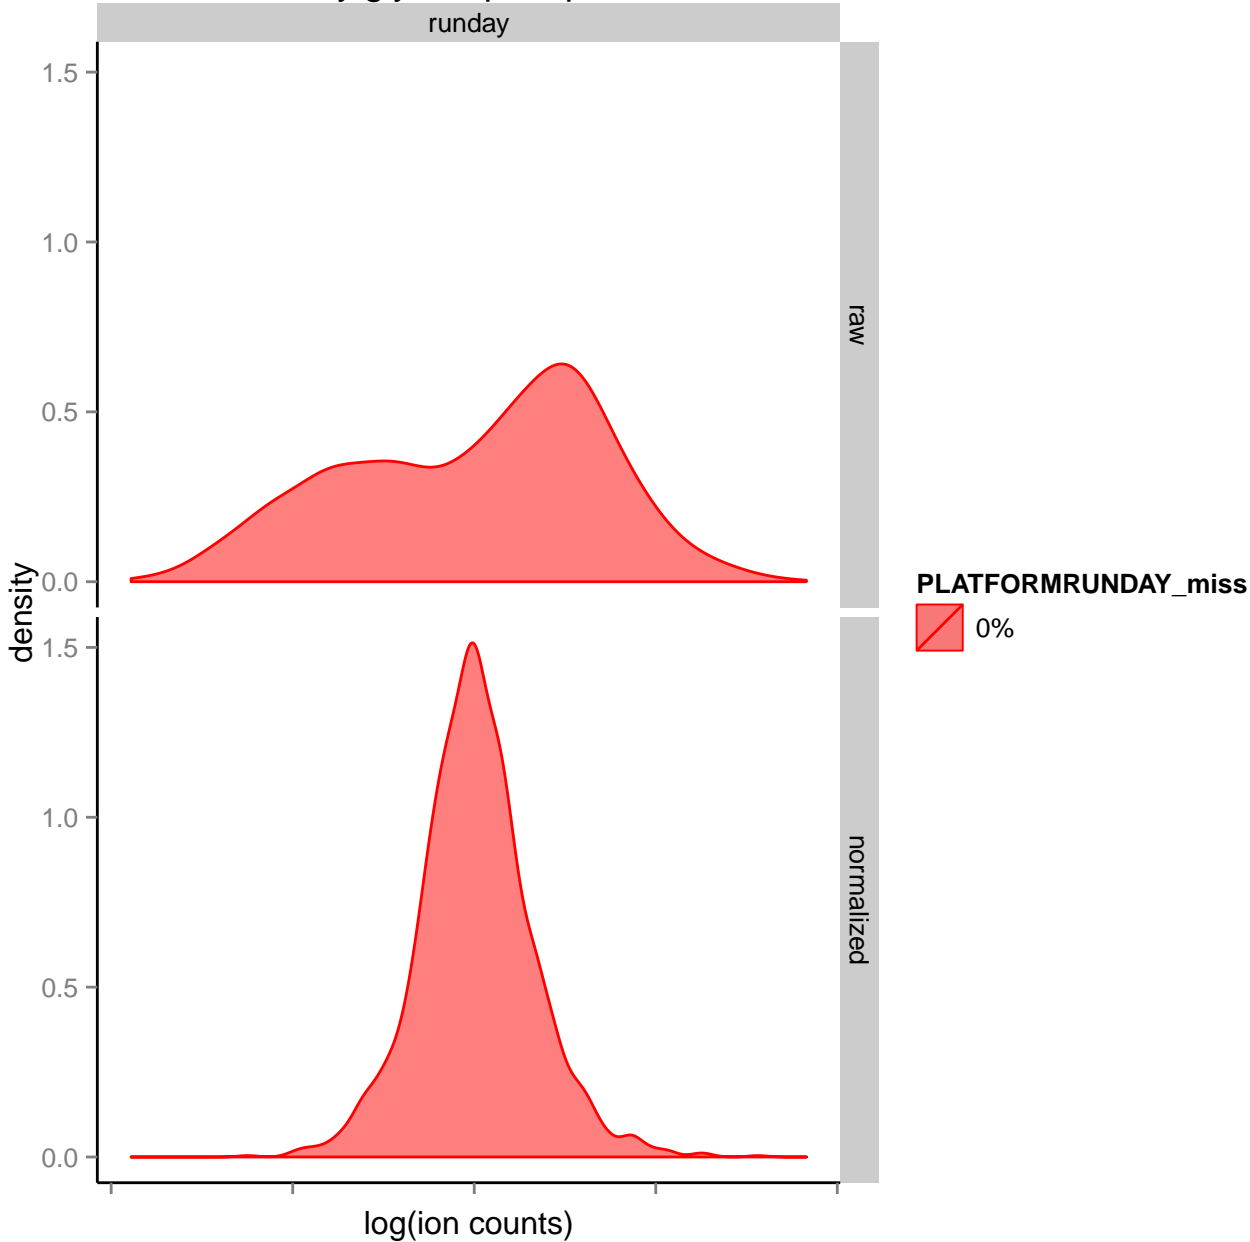

# 1-stearoylglycerophosphoethanolamine

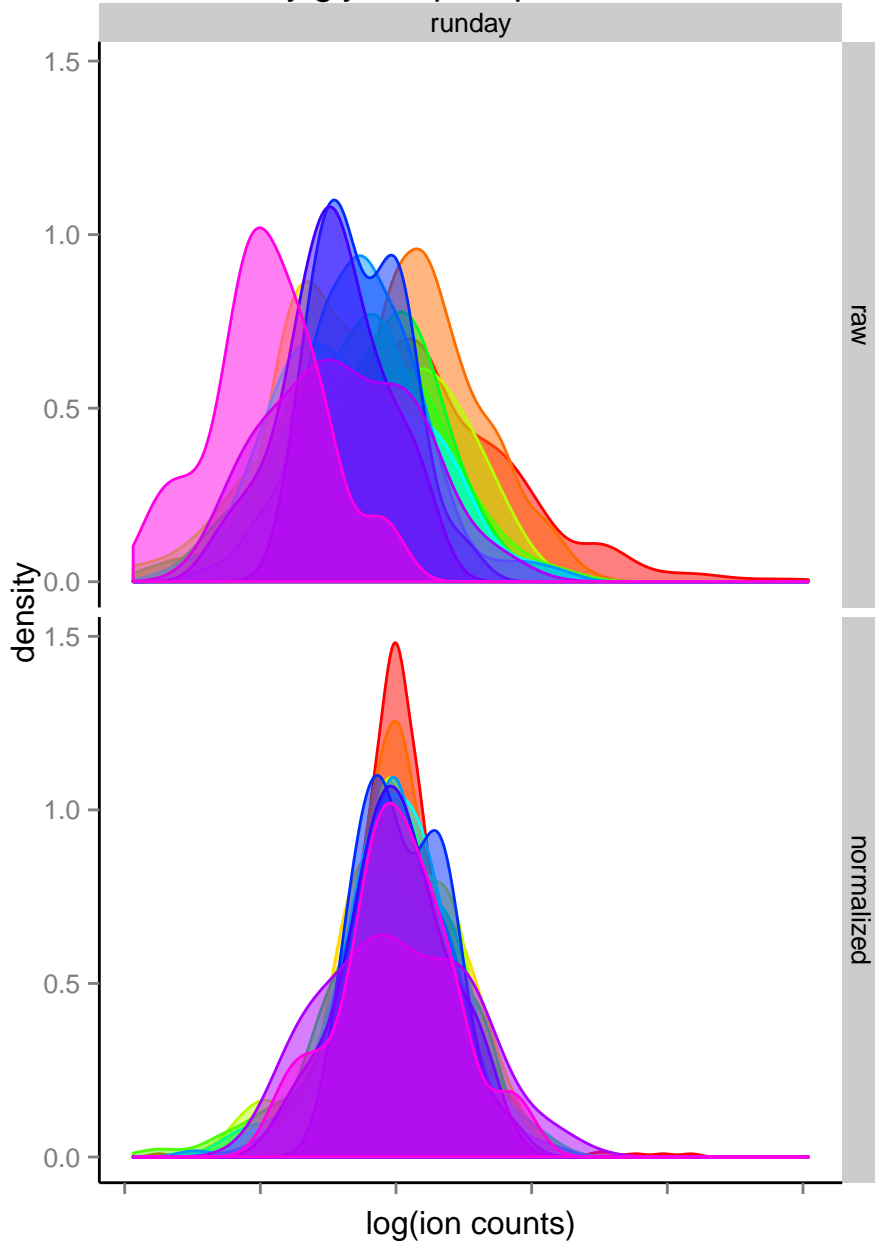

## PLATFORMRUNDAY\_miss

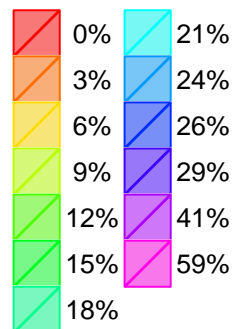

# 1-stearoylglycerophosphoinositol

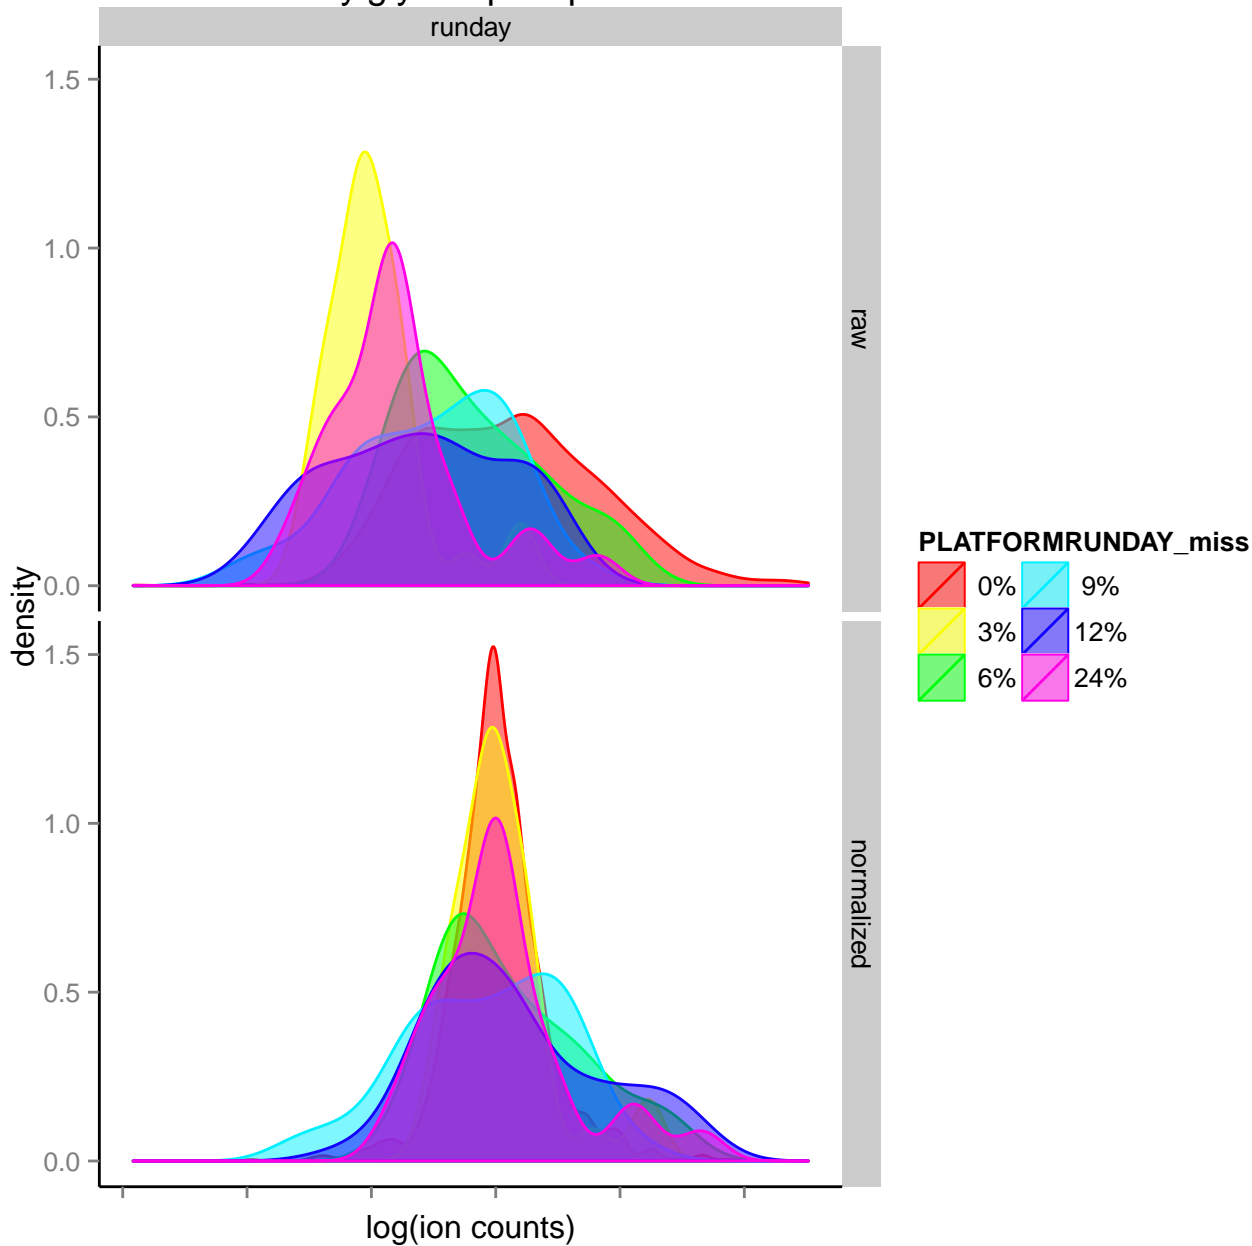

# 1,3,7-trimethylurate

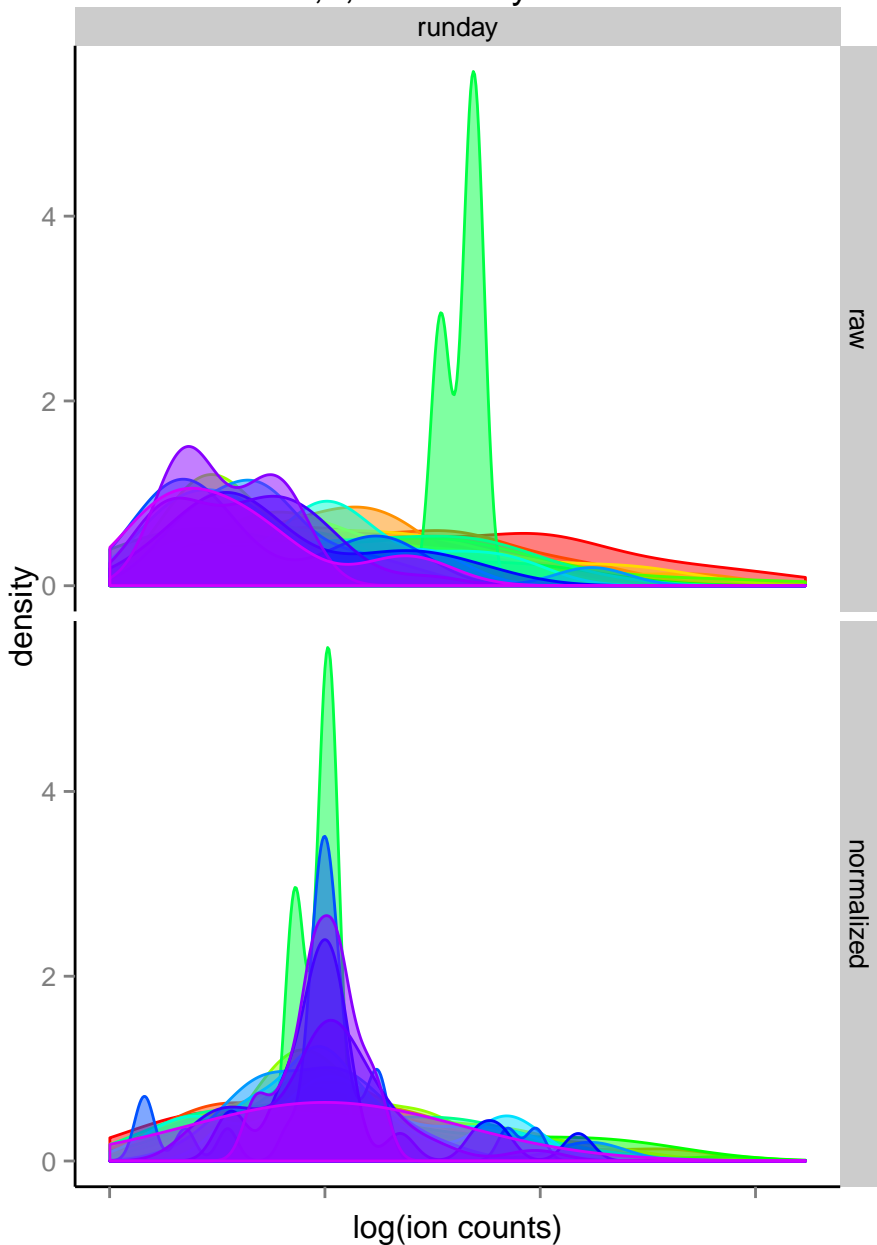

## PLATFORMRUNDAY\_miss

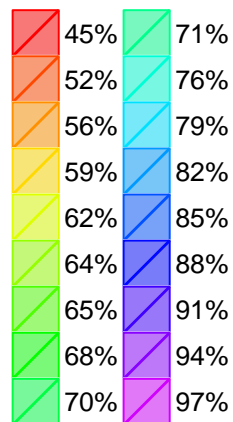

# 1,5-anhydroglucitol (1,5-AG)

runday

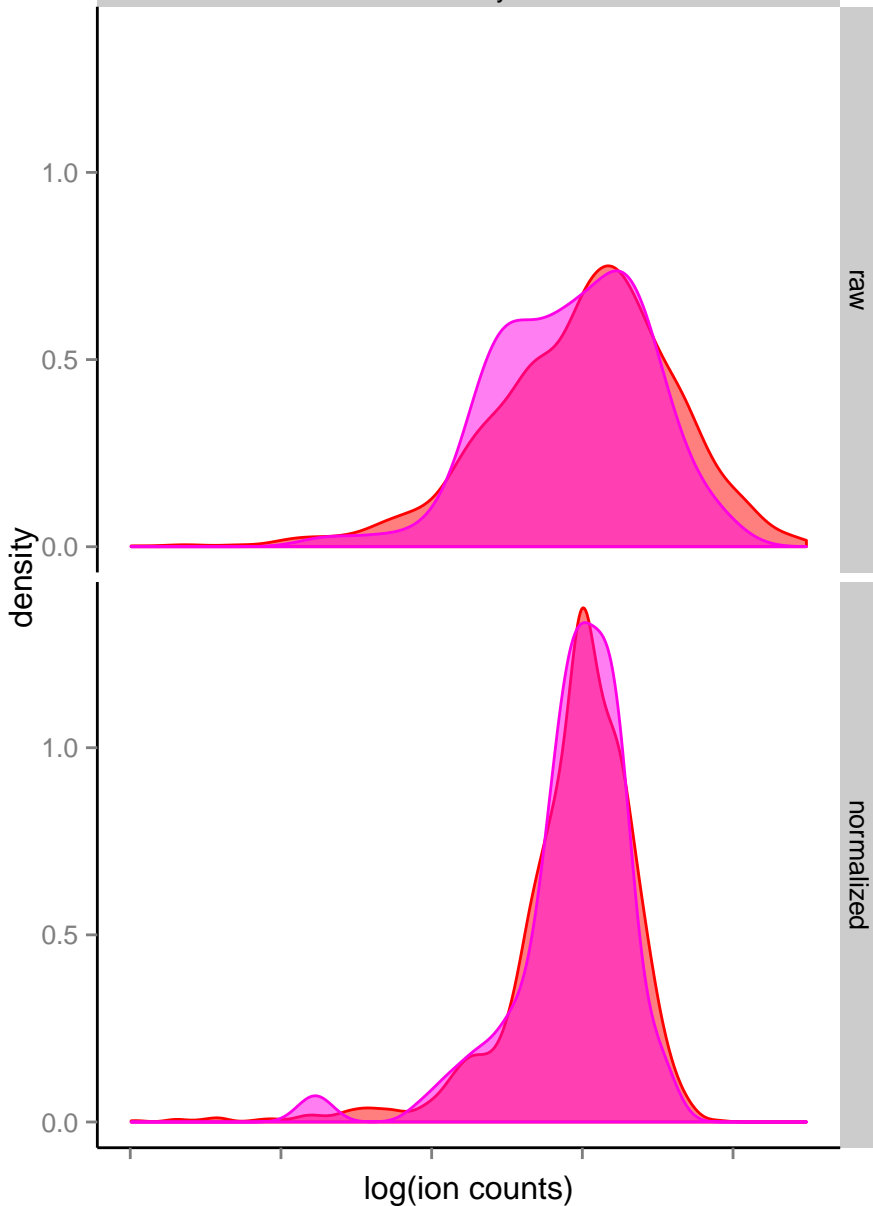

raw

normalized

**PLATFORMRUNDAY\_miss**

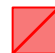

0%

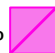

3%



# 1,6-anhydroglucose

runday

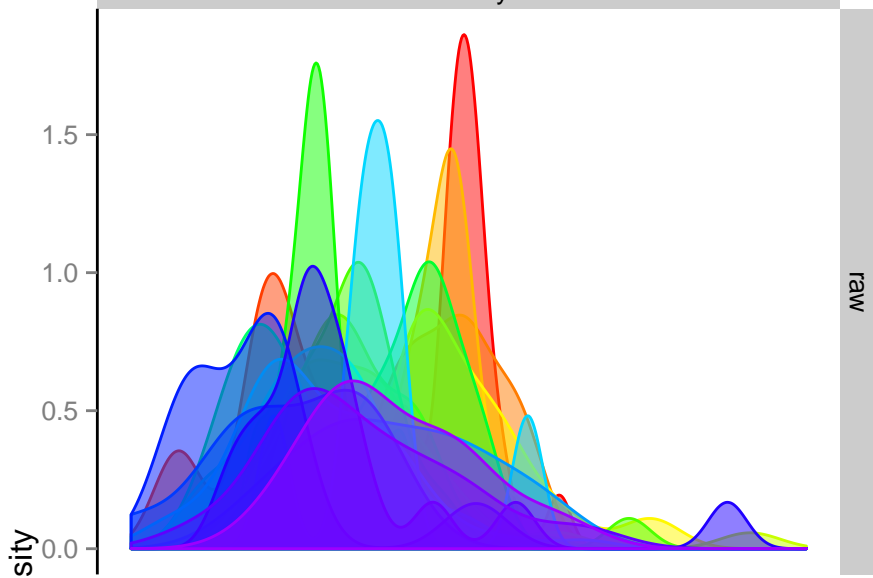

raw

## PLATFORMRUNDAY\_miss

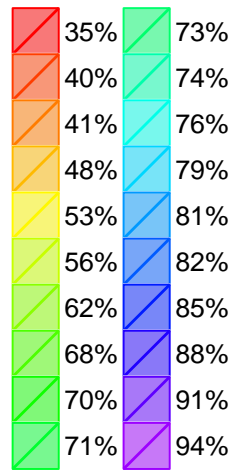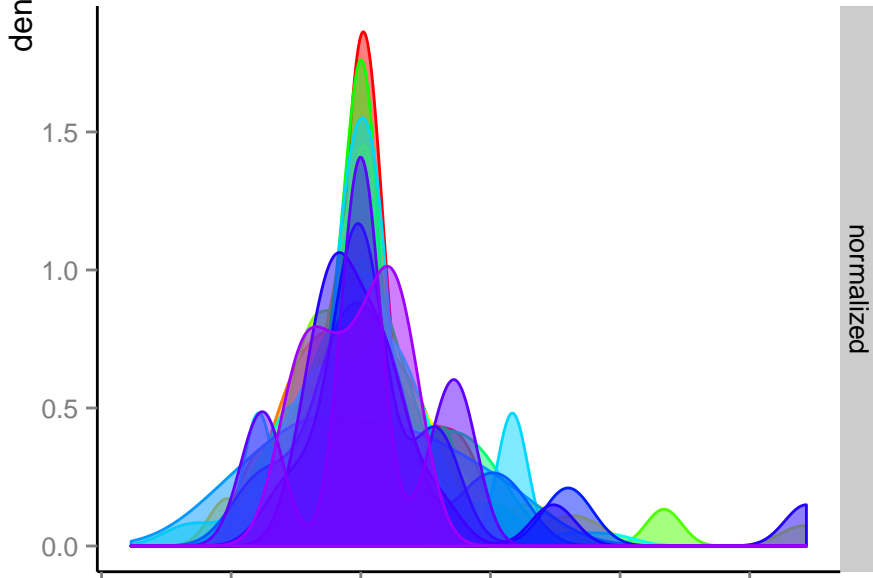

normalized

log(ion counts)

# 1,7-dimethylurate

runday

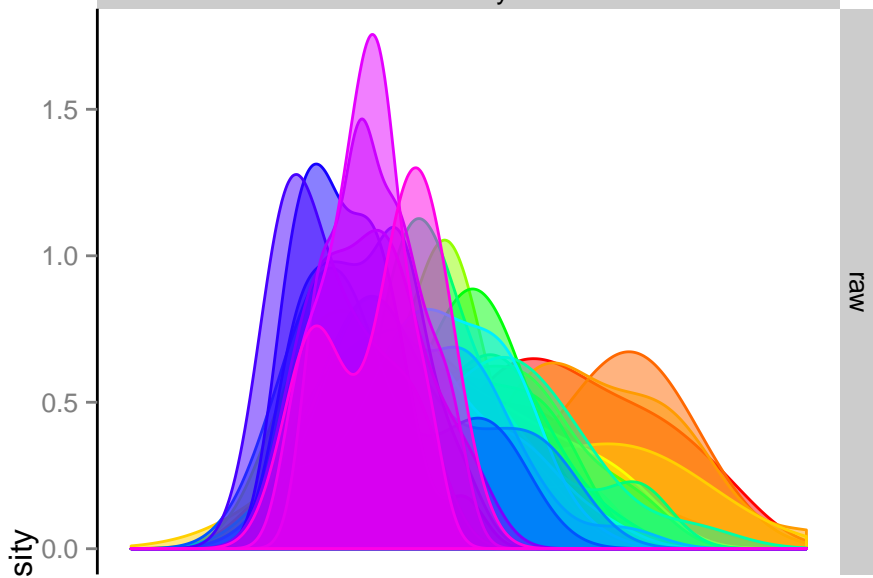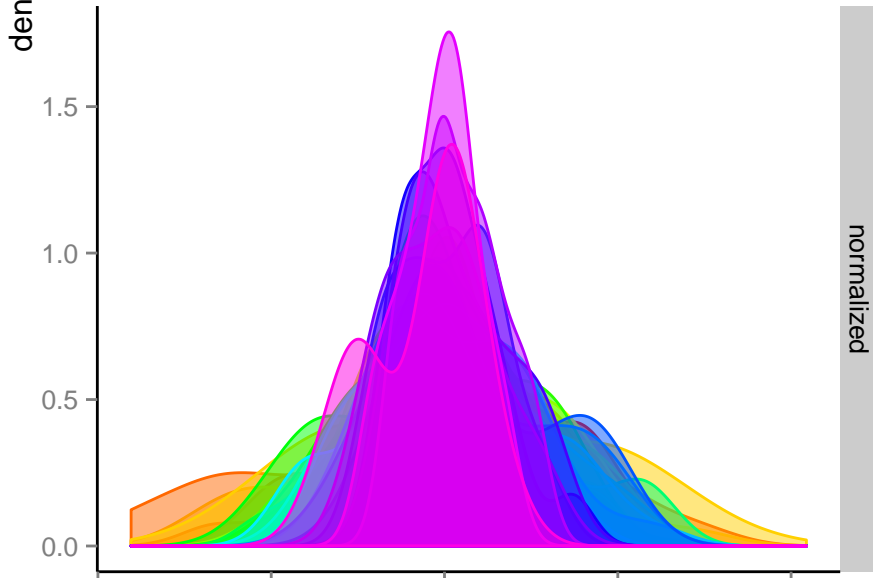

## PLATFORMRUNDAY\_miss

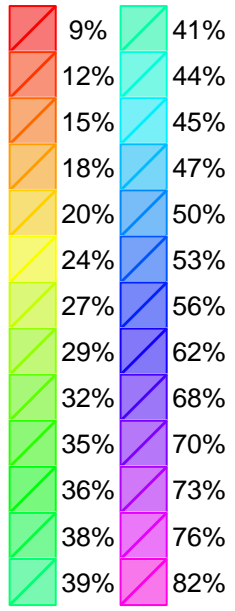

log(ion counts)

# 10-heptadecenoate (17:1n7)

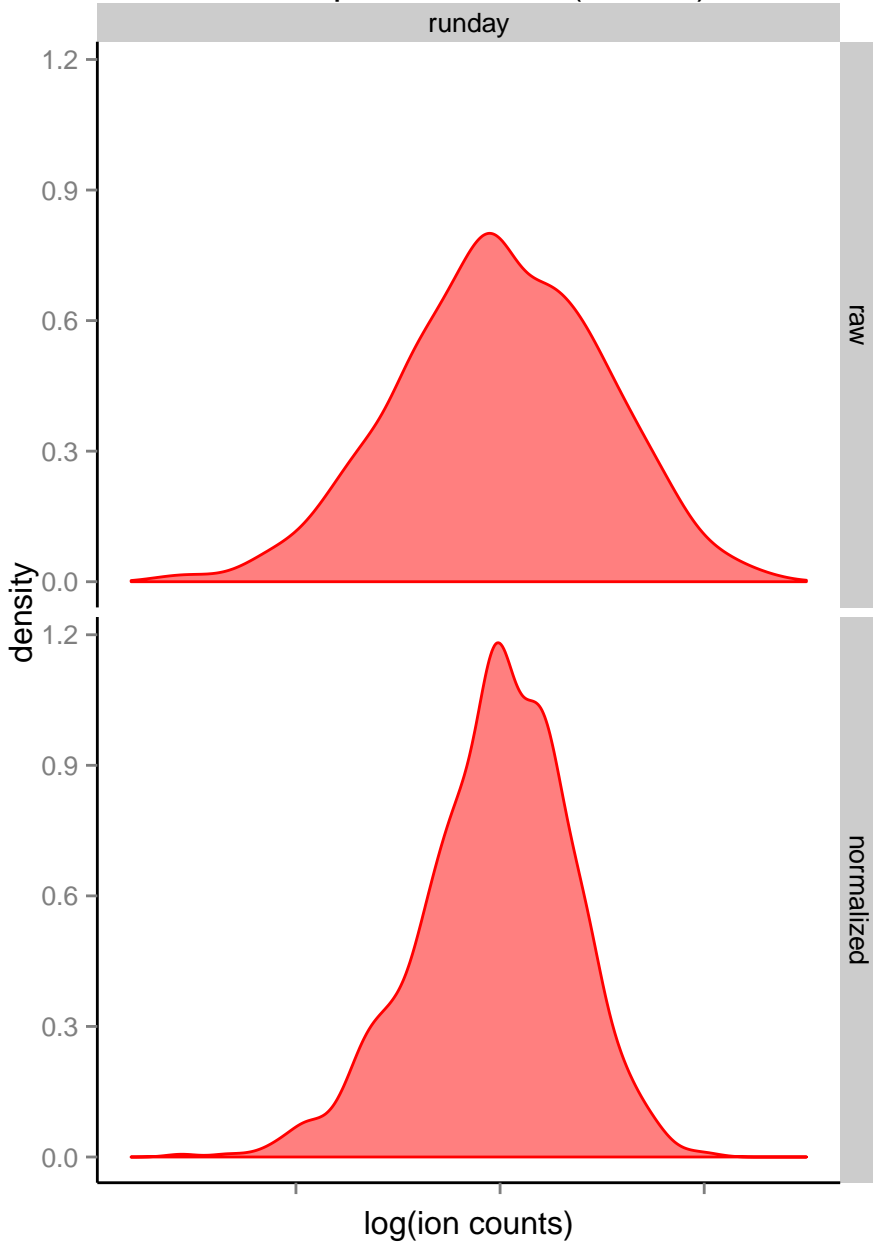

**PLATFORMRUNDAY\_miss**

0%

# 10-nonadecenoate (19:1n9)

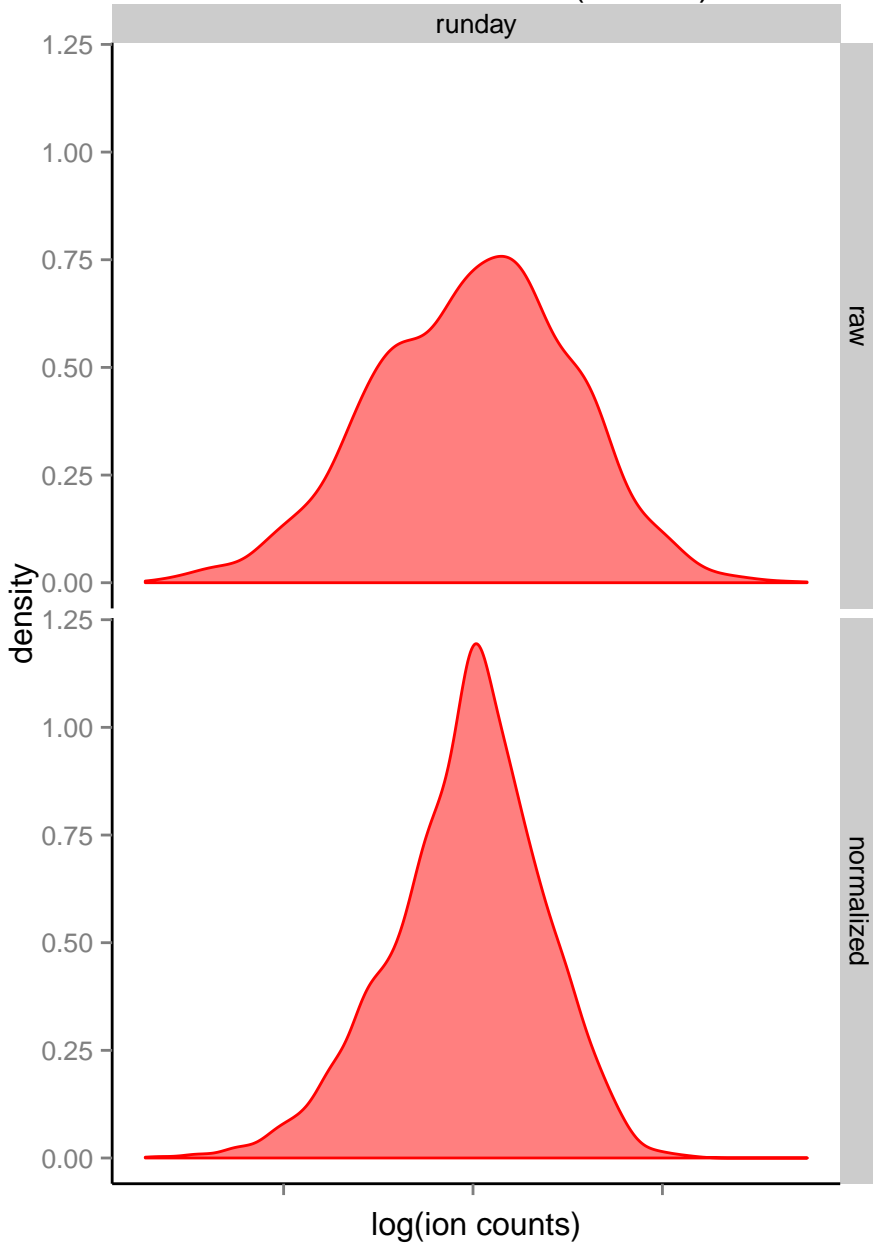

raw

normalized

**PLATFORMRUNDAY\_miss**

0%

# 10-undecenoate (11:1n1)

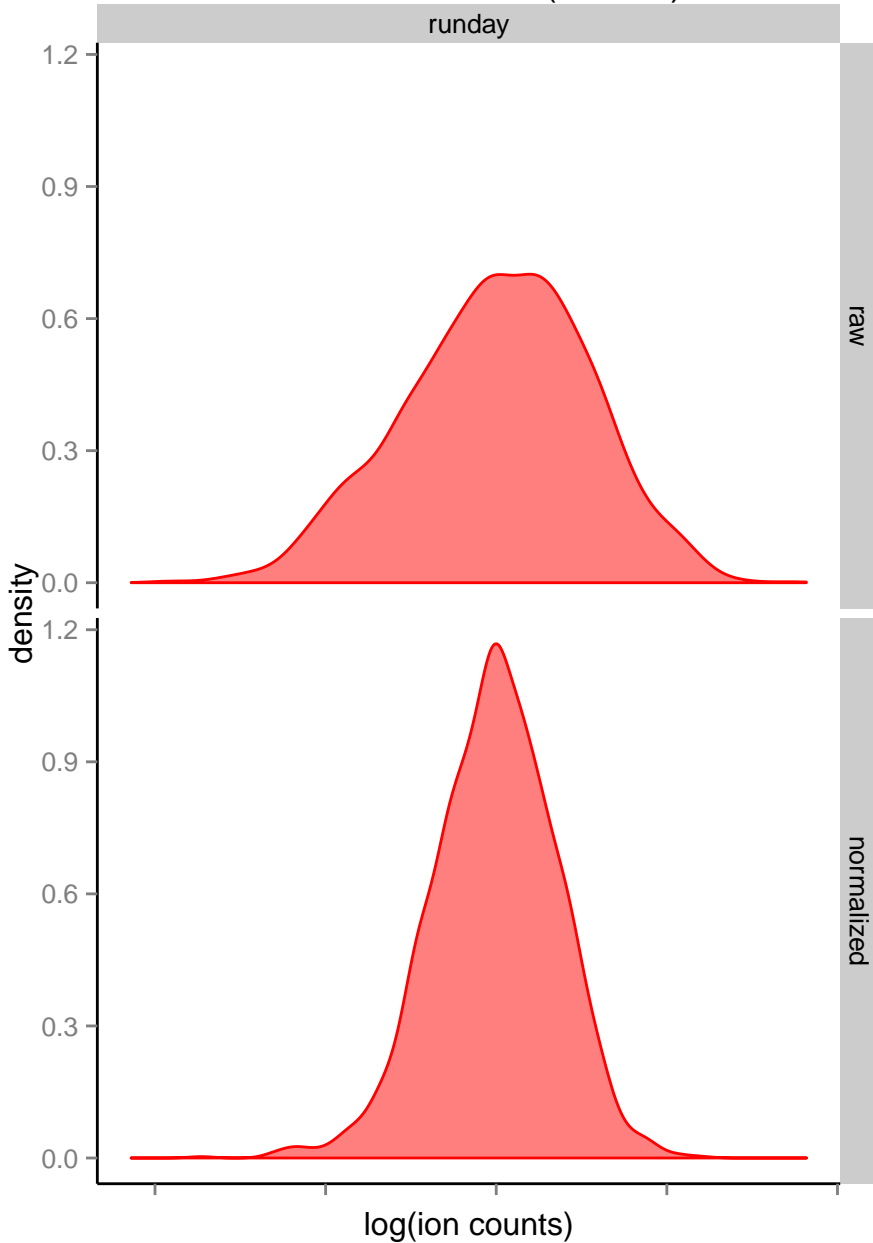

raw

normalized

**PLATFORMRUNDAY\_miss**

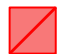

0%

# 2-aminobutyrate

runday

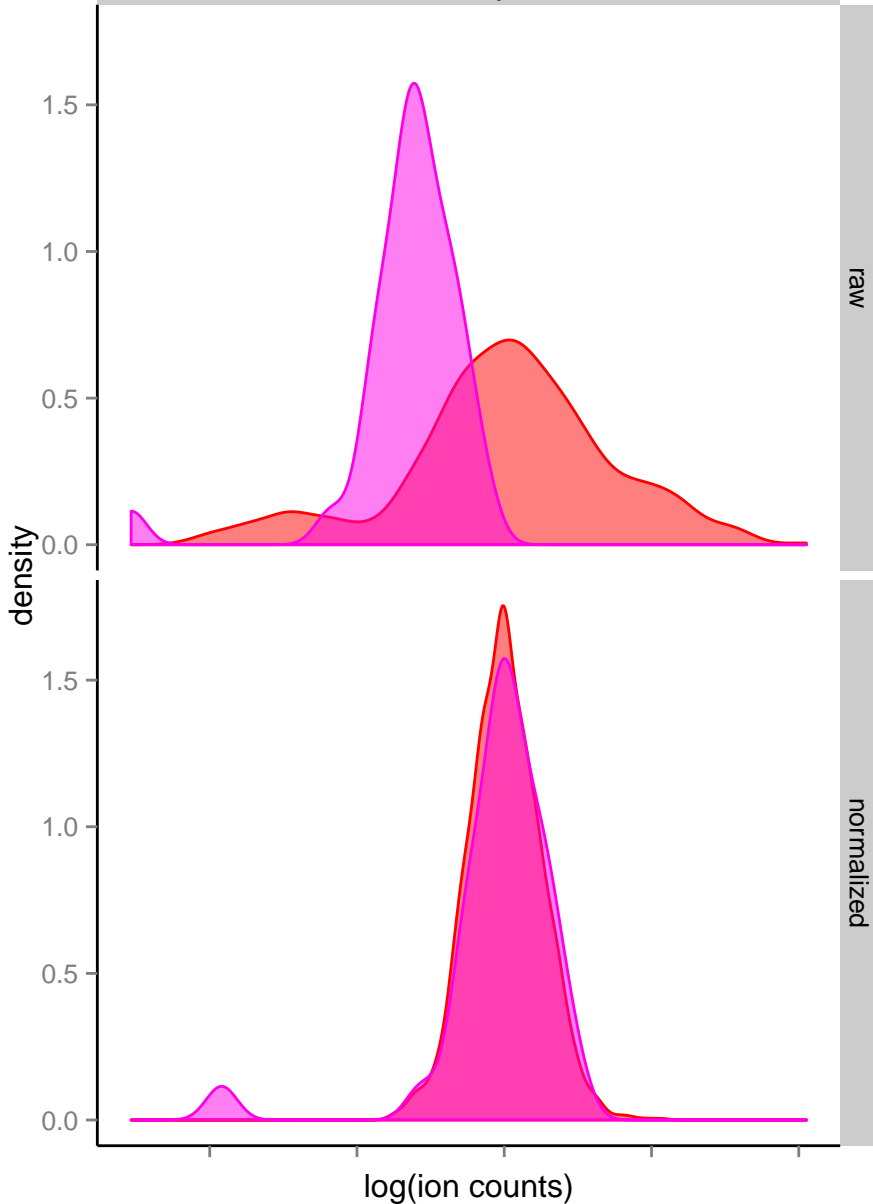

raw

normalized

**PLATFORMRUNDAY\_miss**

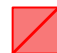

0%

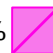

3%

# 2-hydroxyacetaminophen sulfate\*

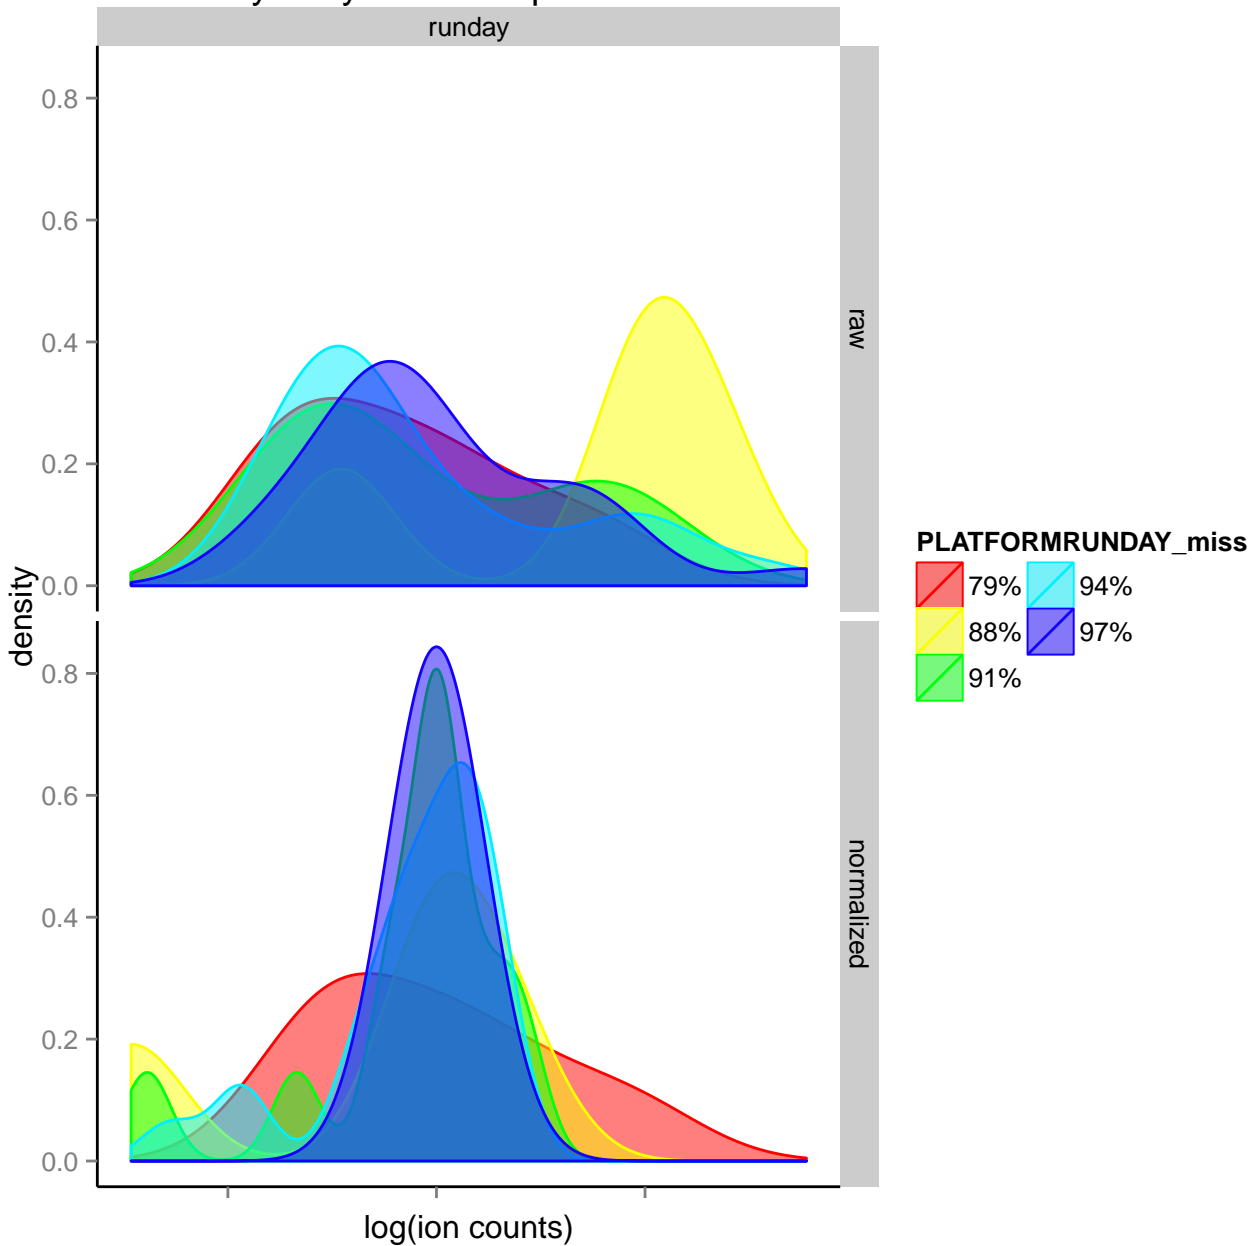

# 2-hydroxybutyrate (AHB)

runday

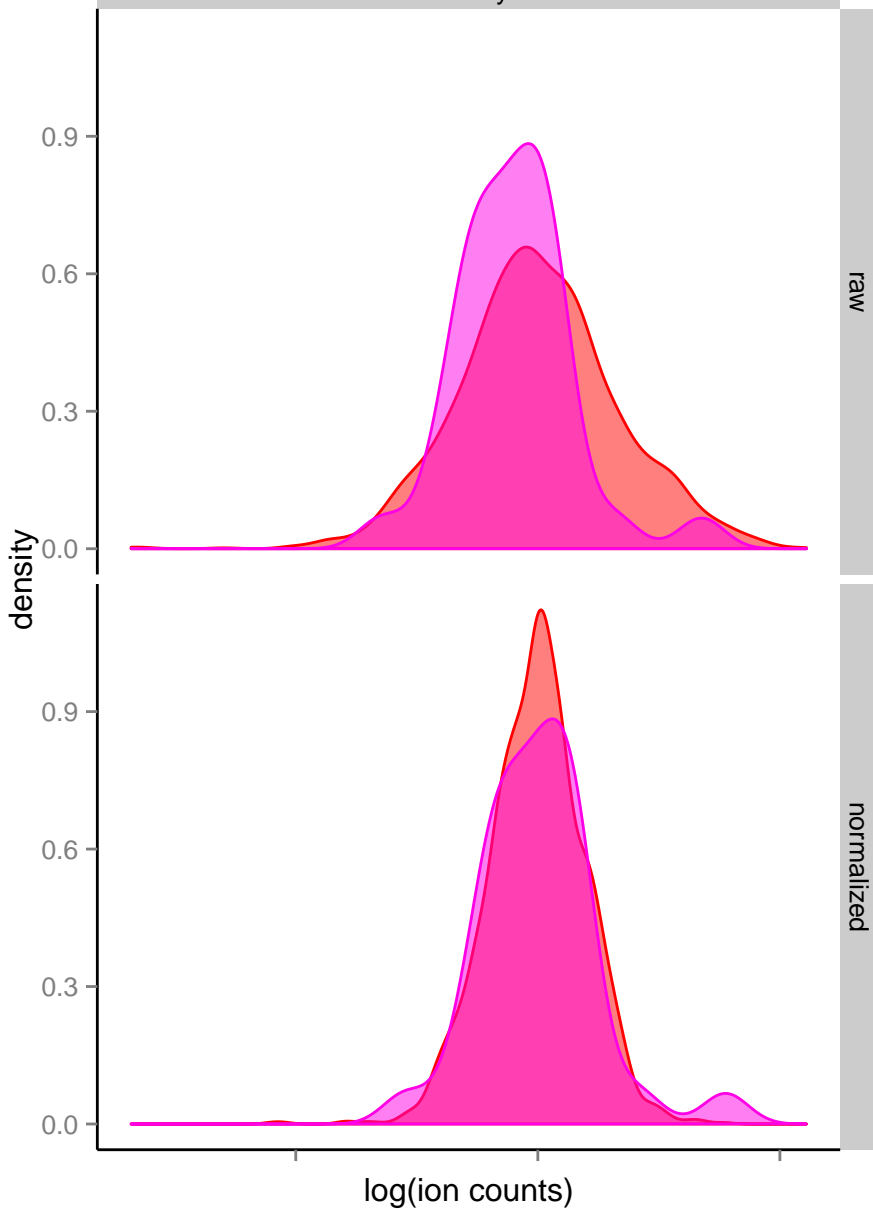

**PLATFORMRUNDAY\_miss**

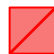

0%

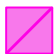

3%



# 2-hydroxyhippurate (salicylurate)

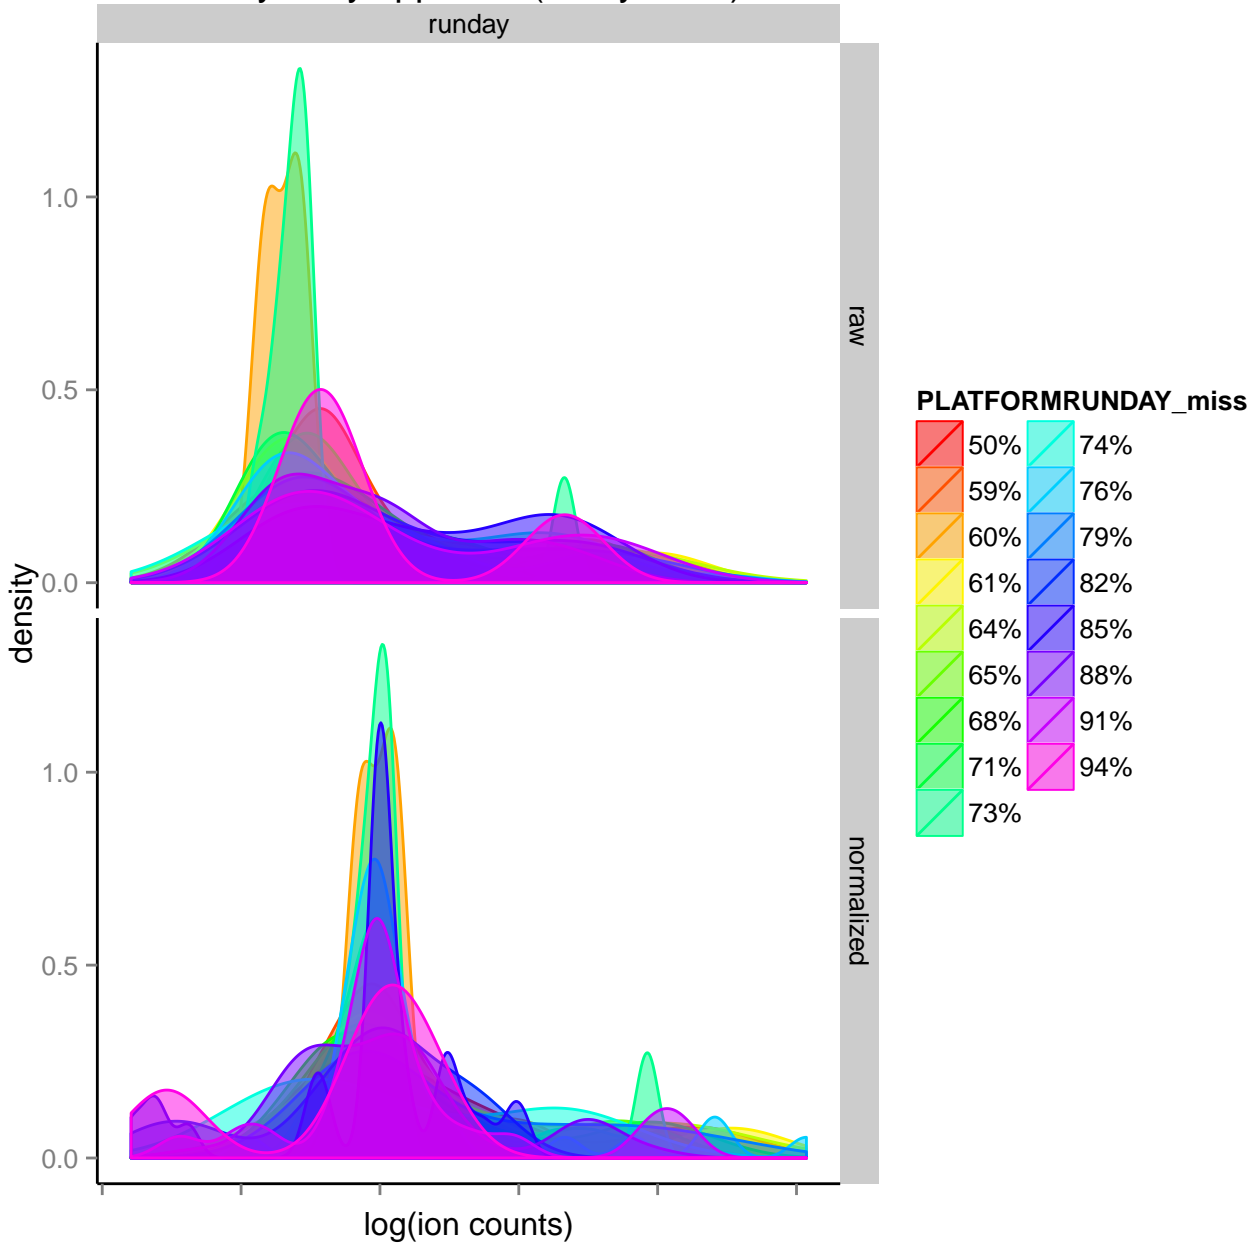

# 2-hydroxyisobutyrate

runday

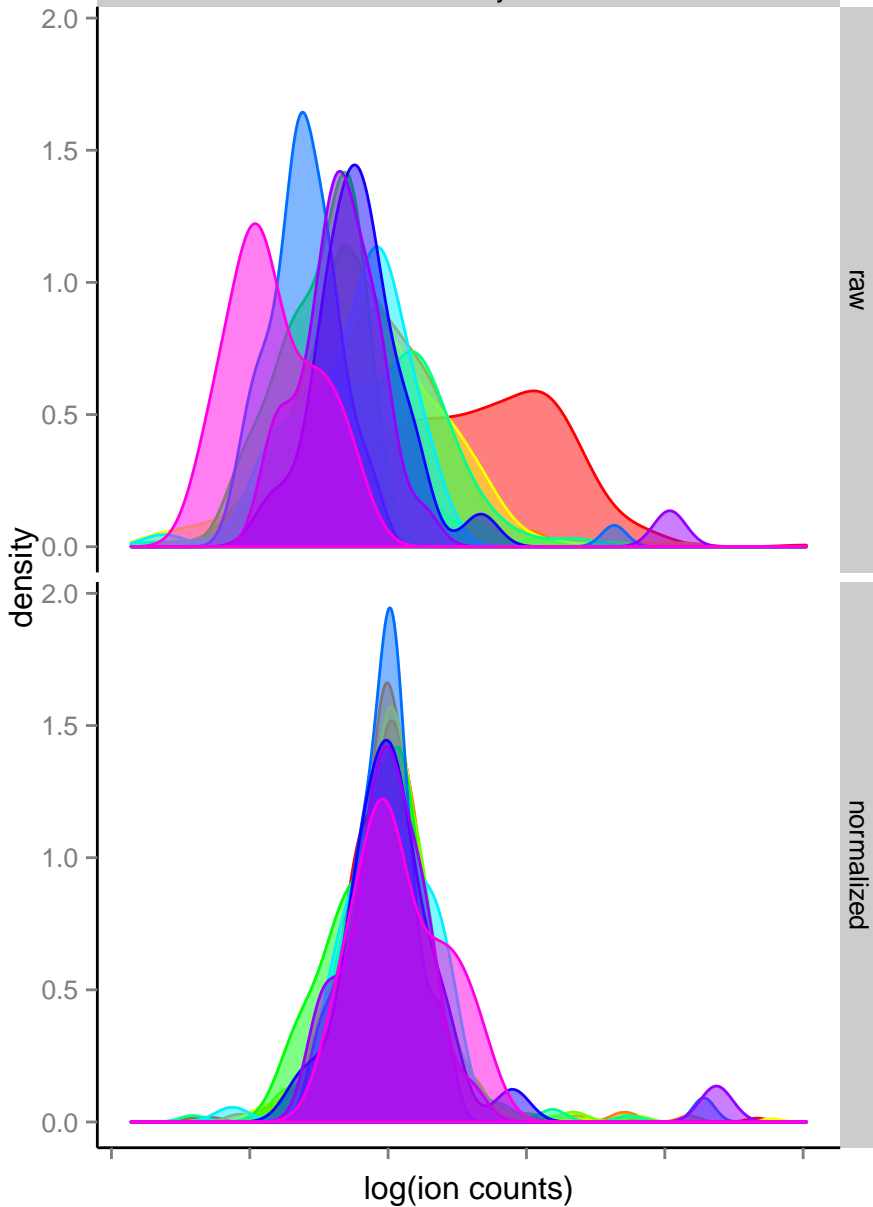

raw

normalized

## PLATFORMRUNDAY\_miss

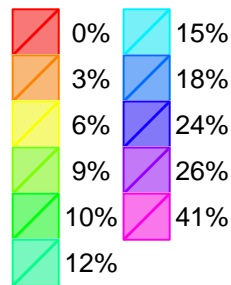

# 2-hydroxypalmitate

runday

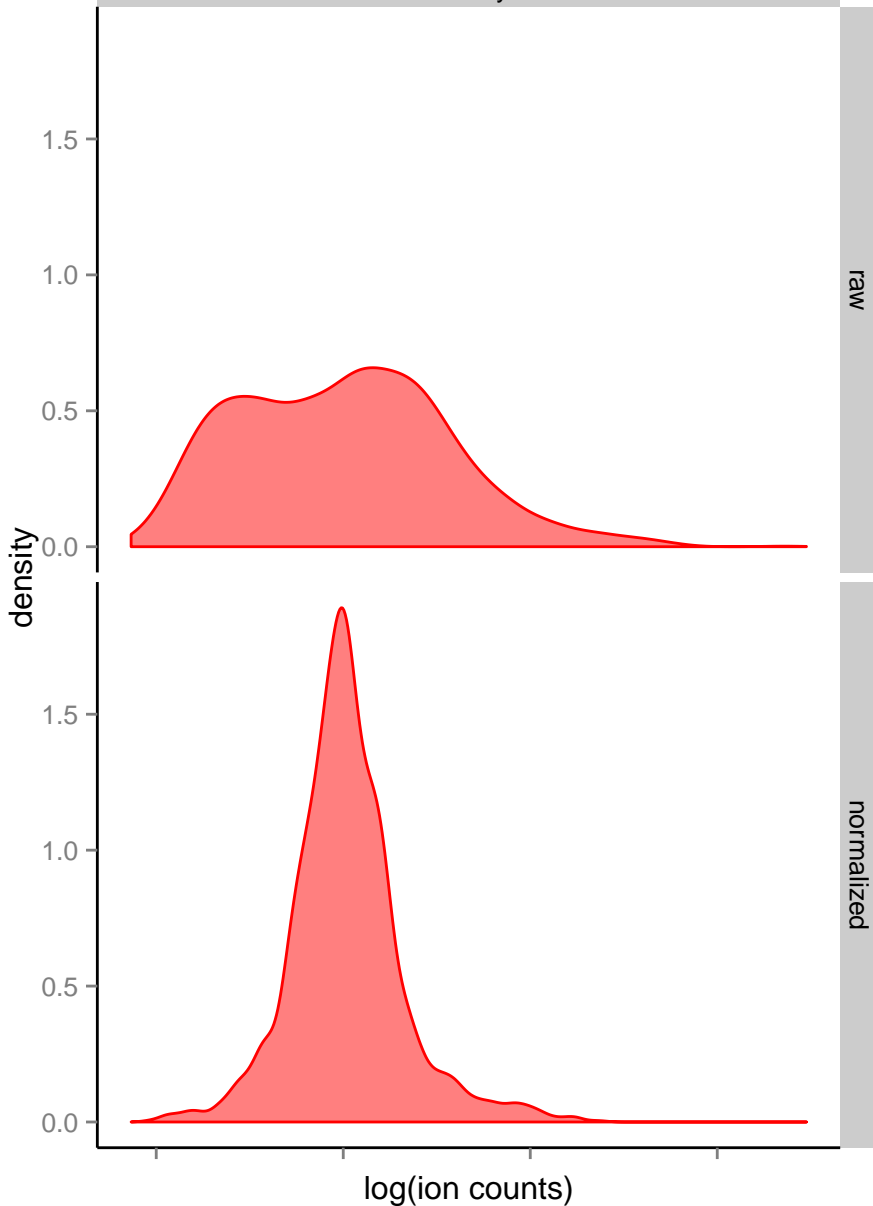

PLATFORMRUNDAY\_miss

0%

# 2-hydroxystearate

runday

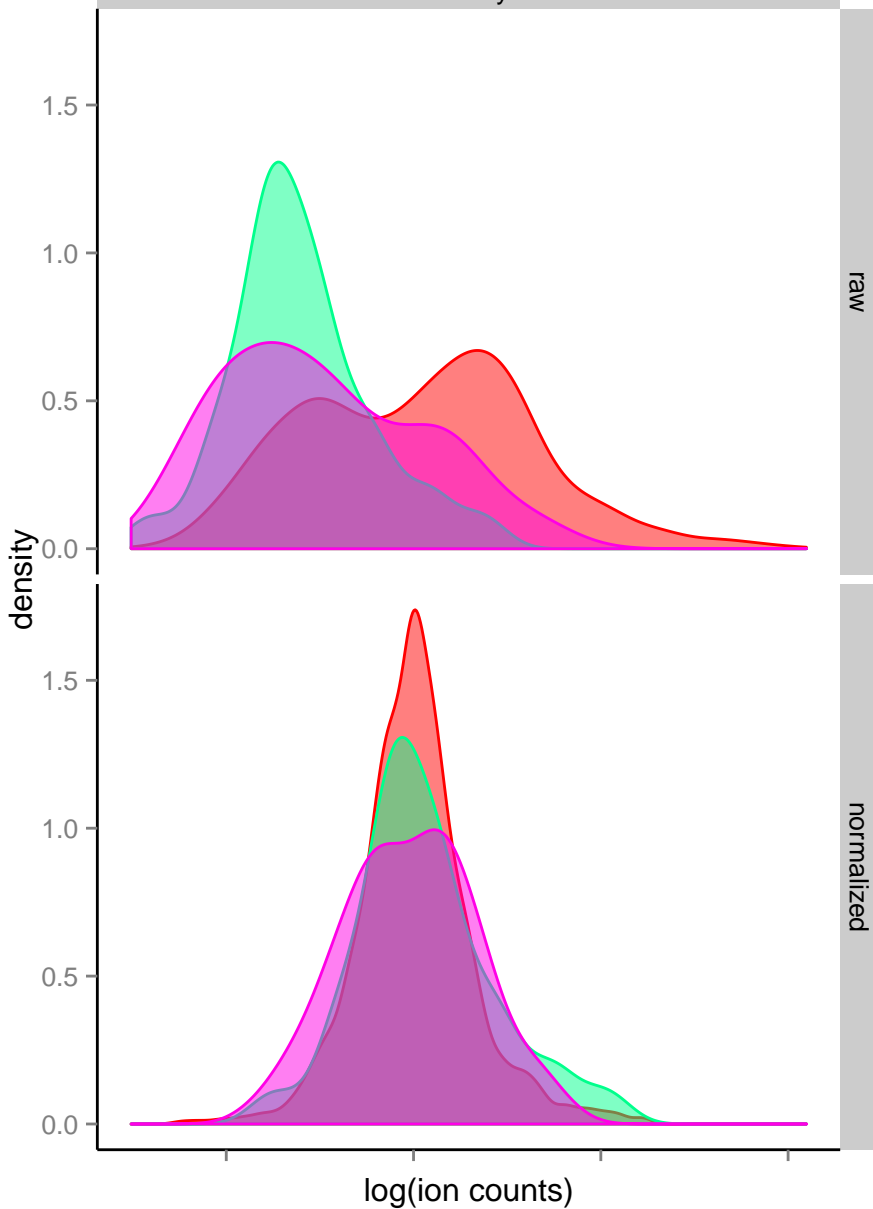

raw

normalized

**PLATFORMRUNDAY\_miss**

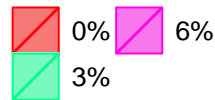

log(ion counts)

density

# 2-linoleoylglycerophosphocholine\*

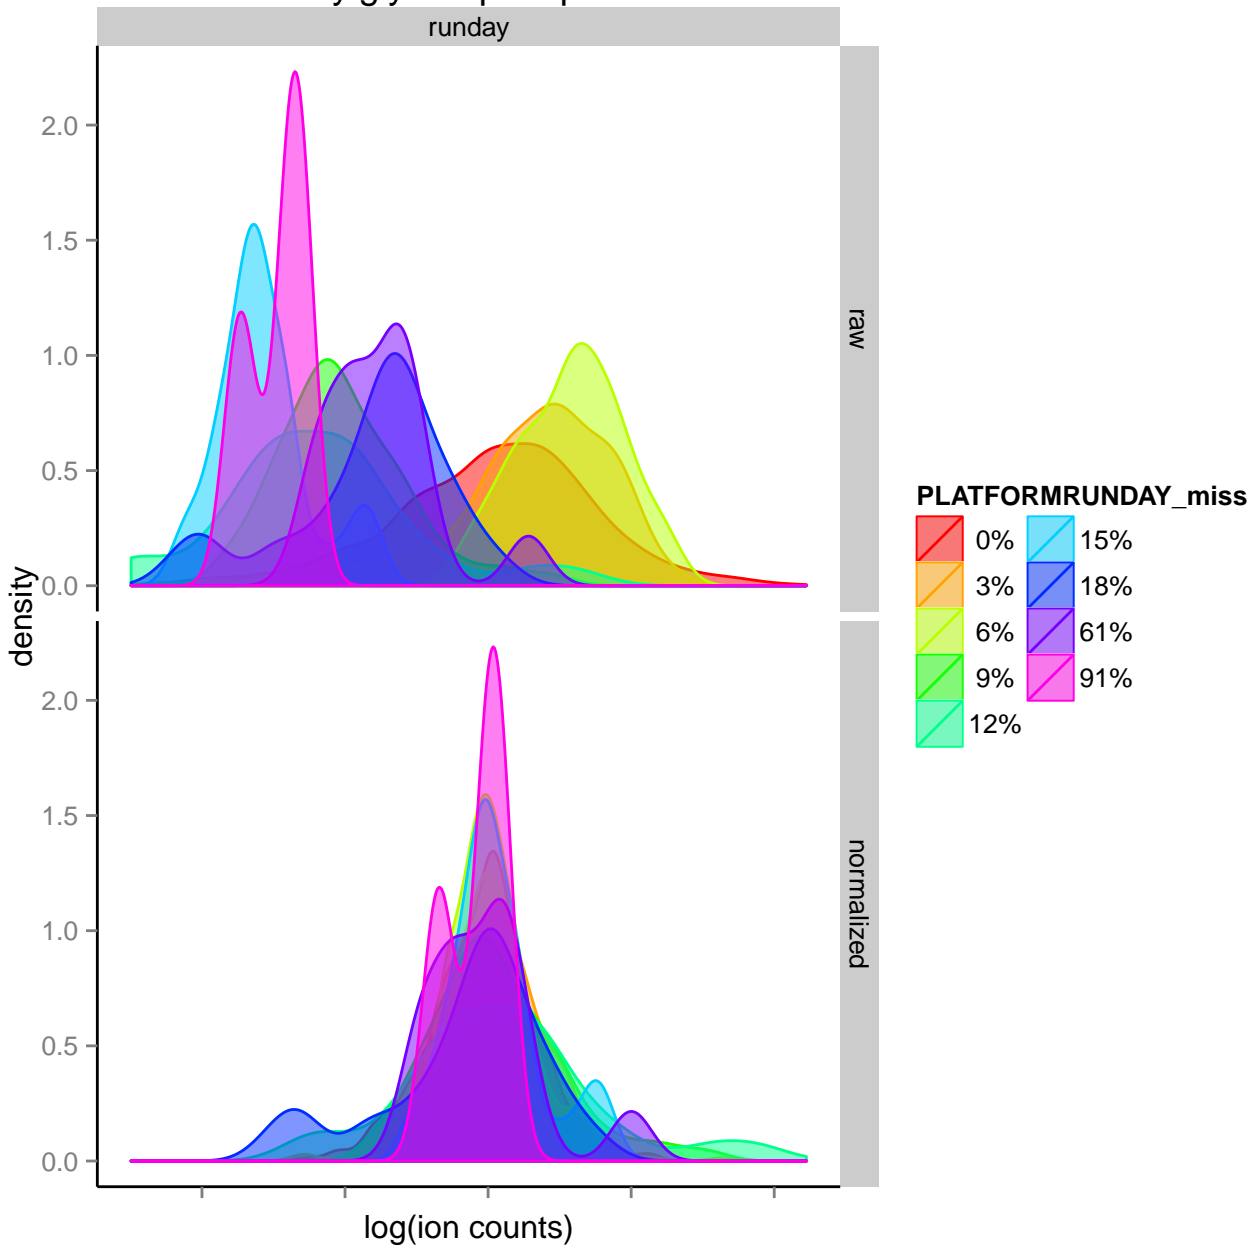

# 2-linoleoylglycerophosphoethanolamine\*

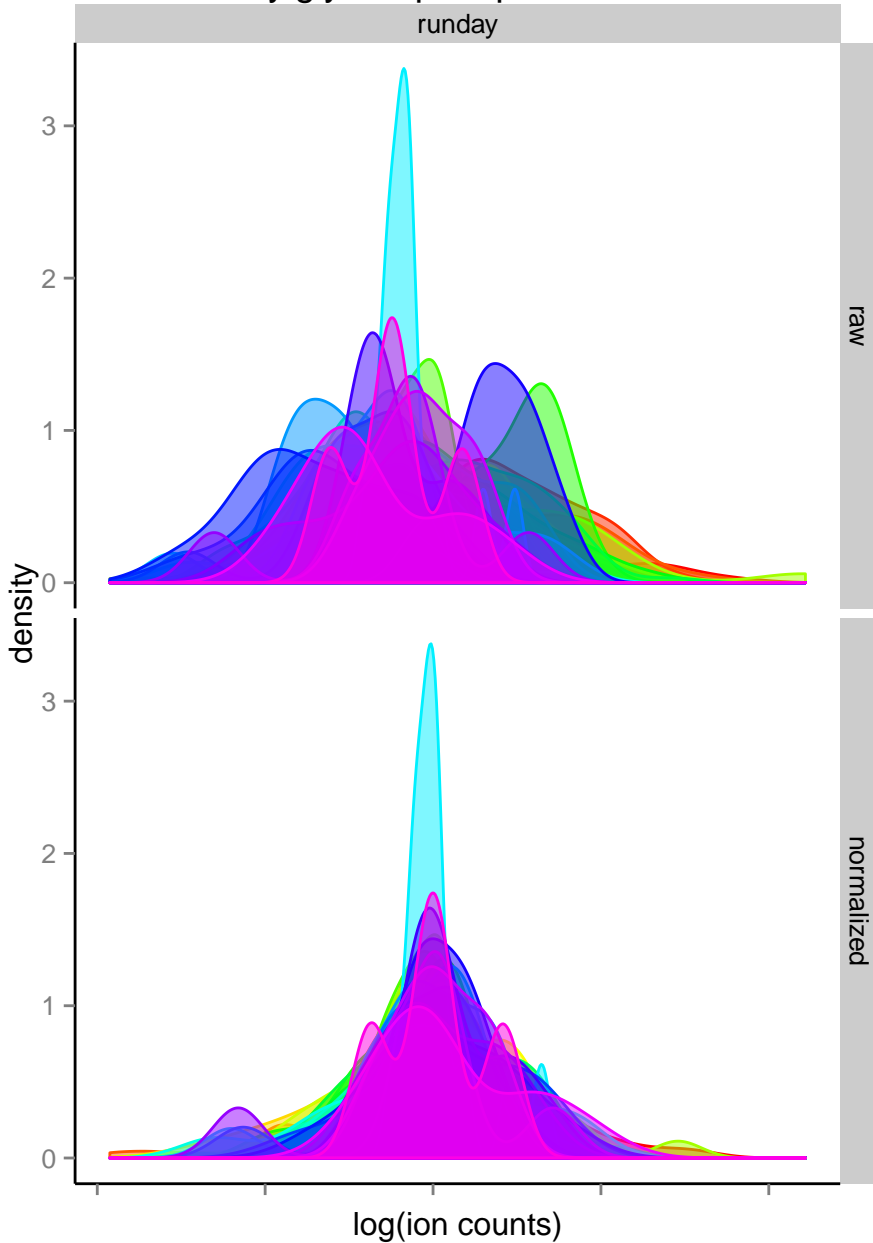

## PLATFORMRUNDAY\_miss

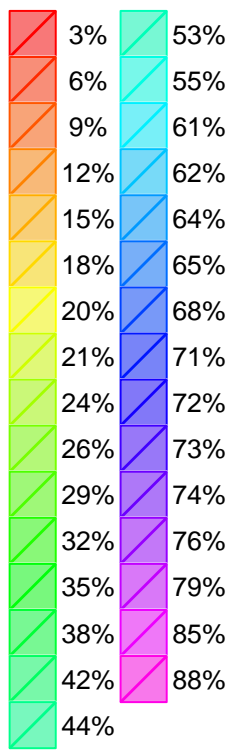

# 2-methoxyacetaminophen sulfate\*

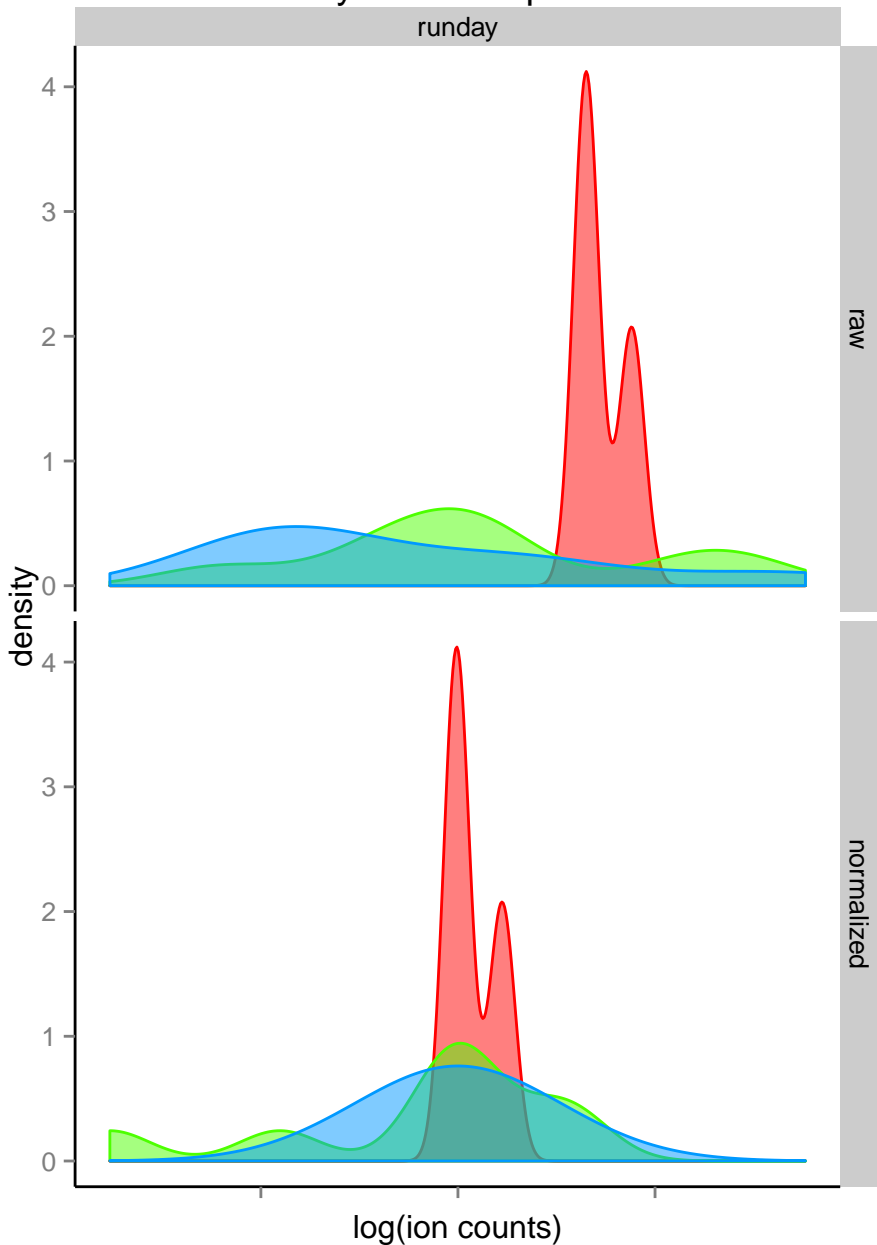

**PLATFORMRUNDAY\_miss**

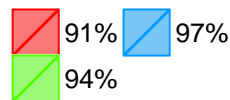

# 2-methylbutyrylcarnitine

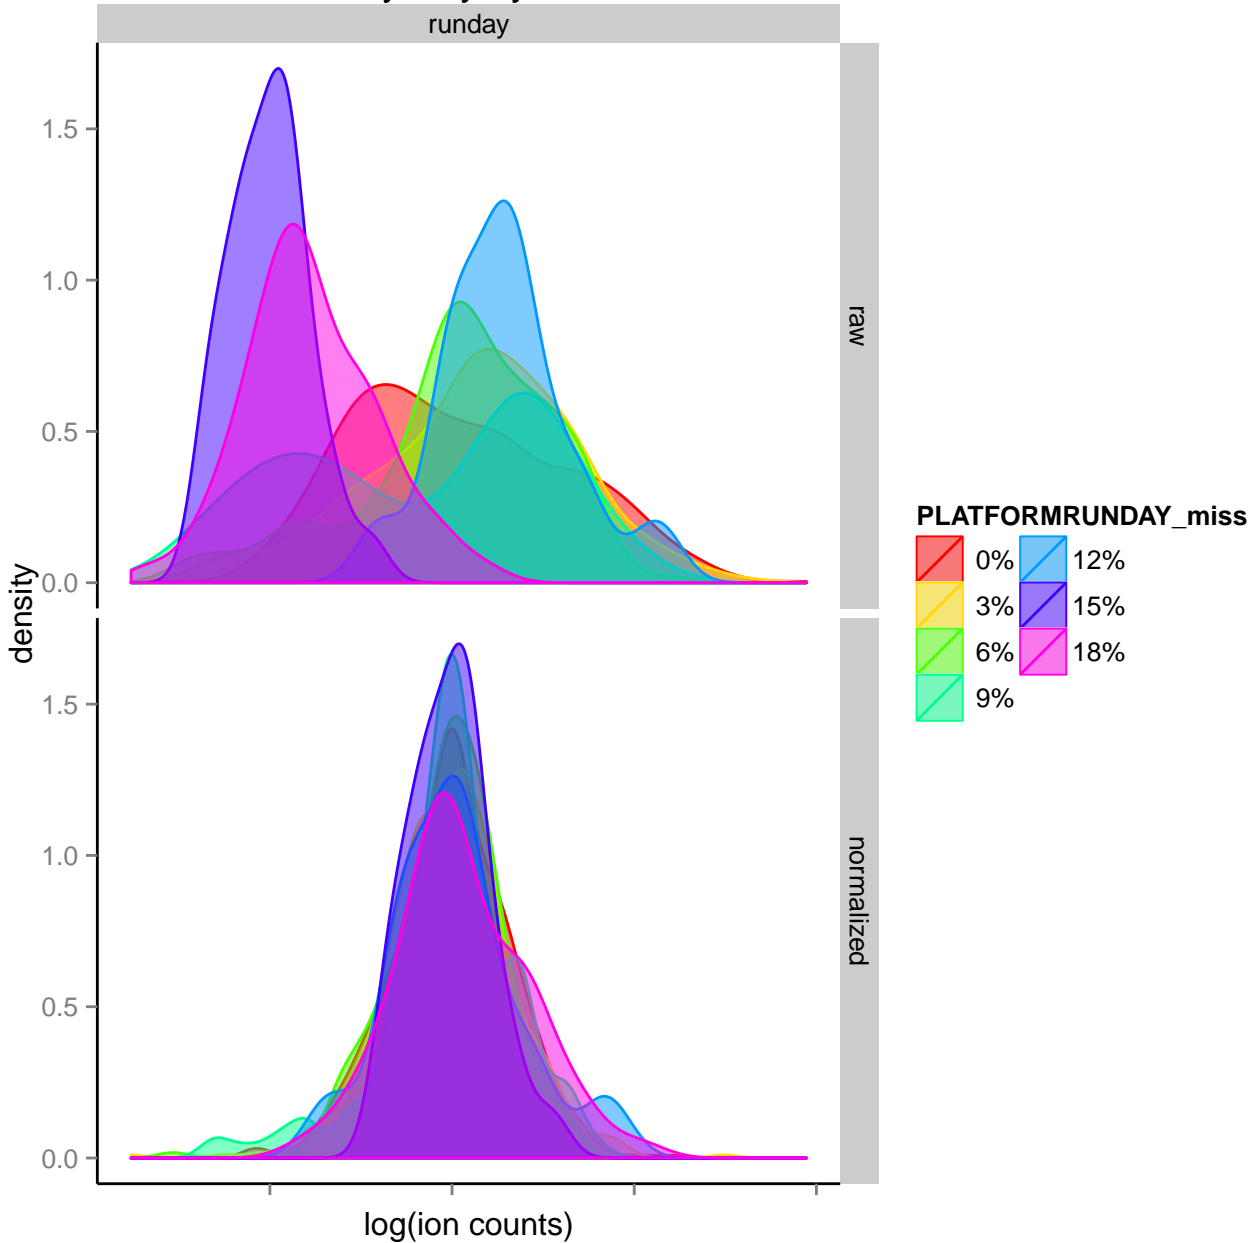



# 2-oleoylglycerophosphocholine\*

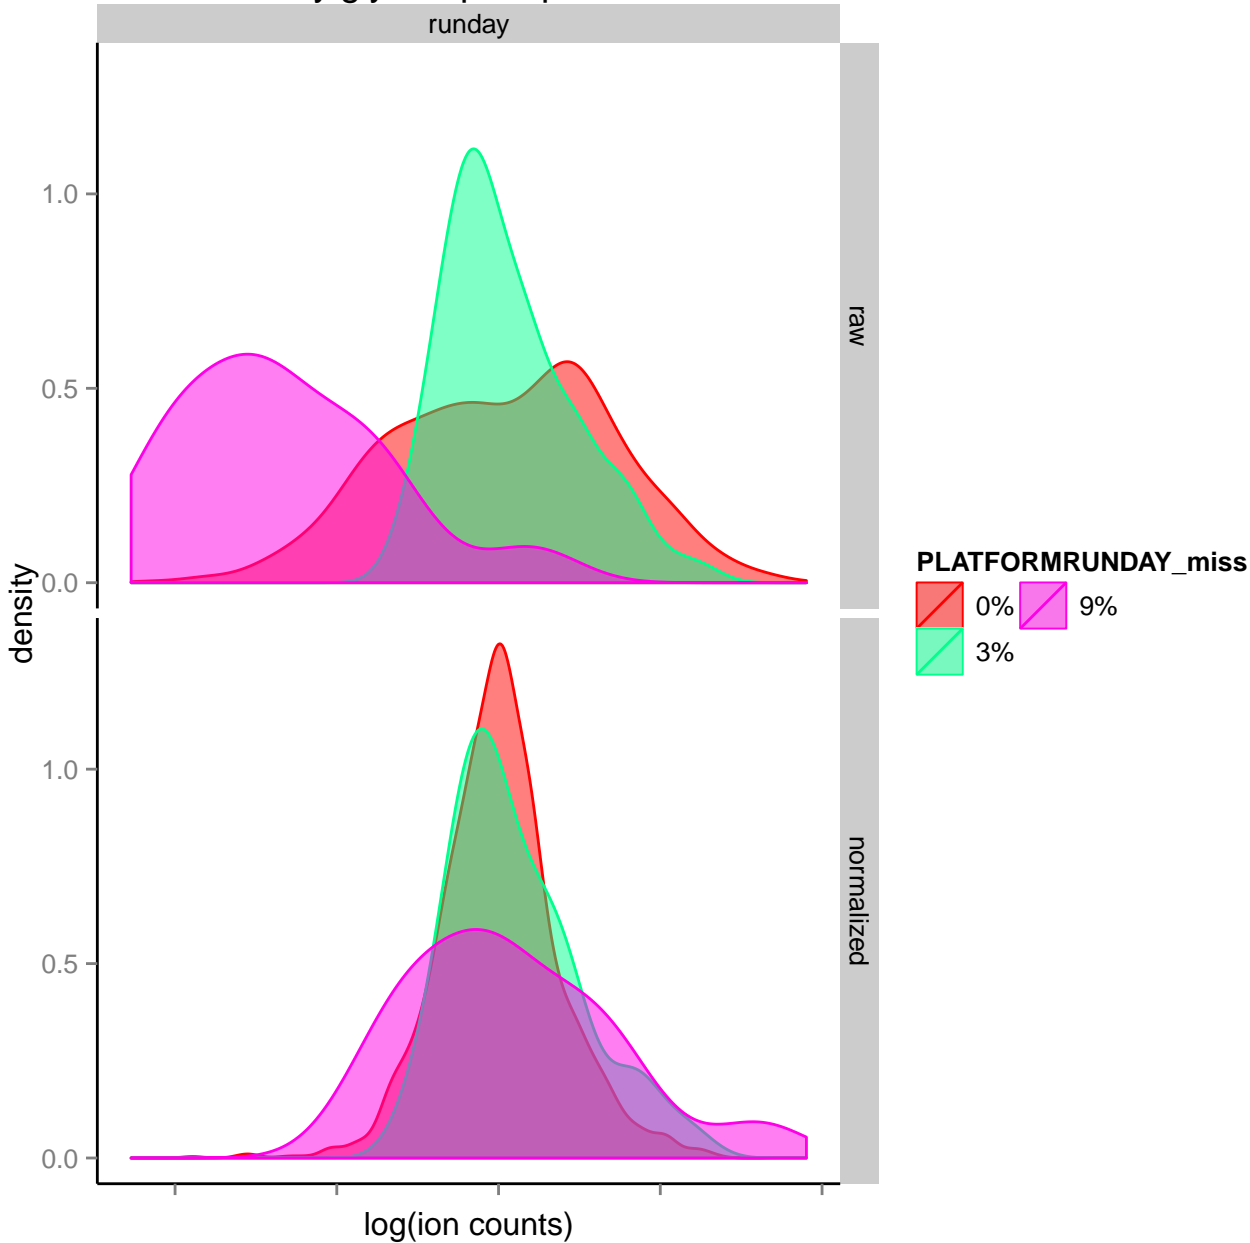

# 2-palmitoylglycerophosphocholine\*

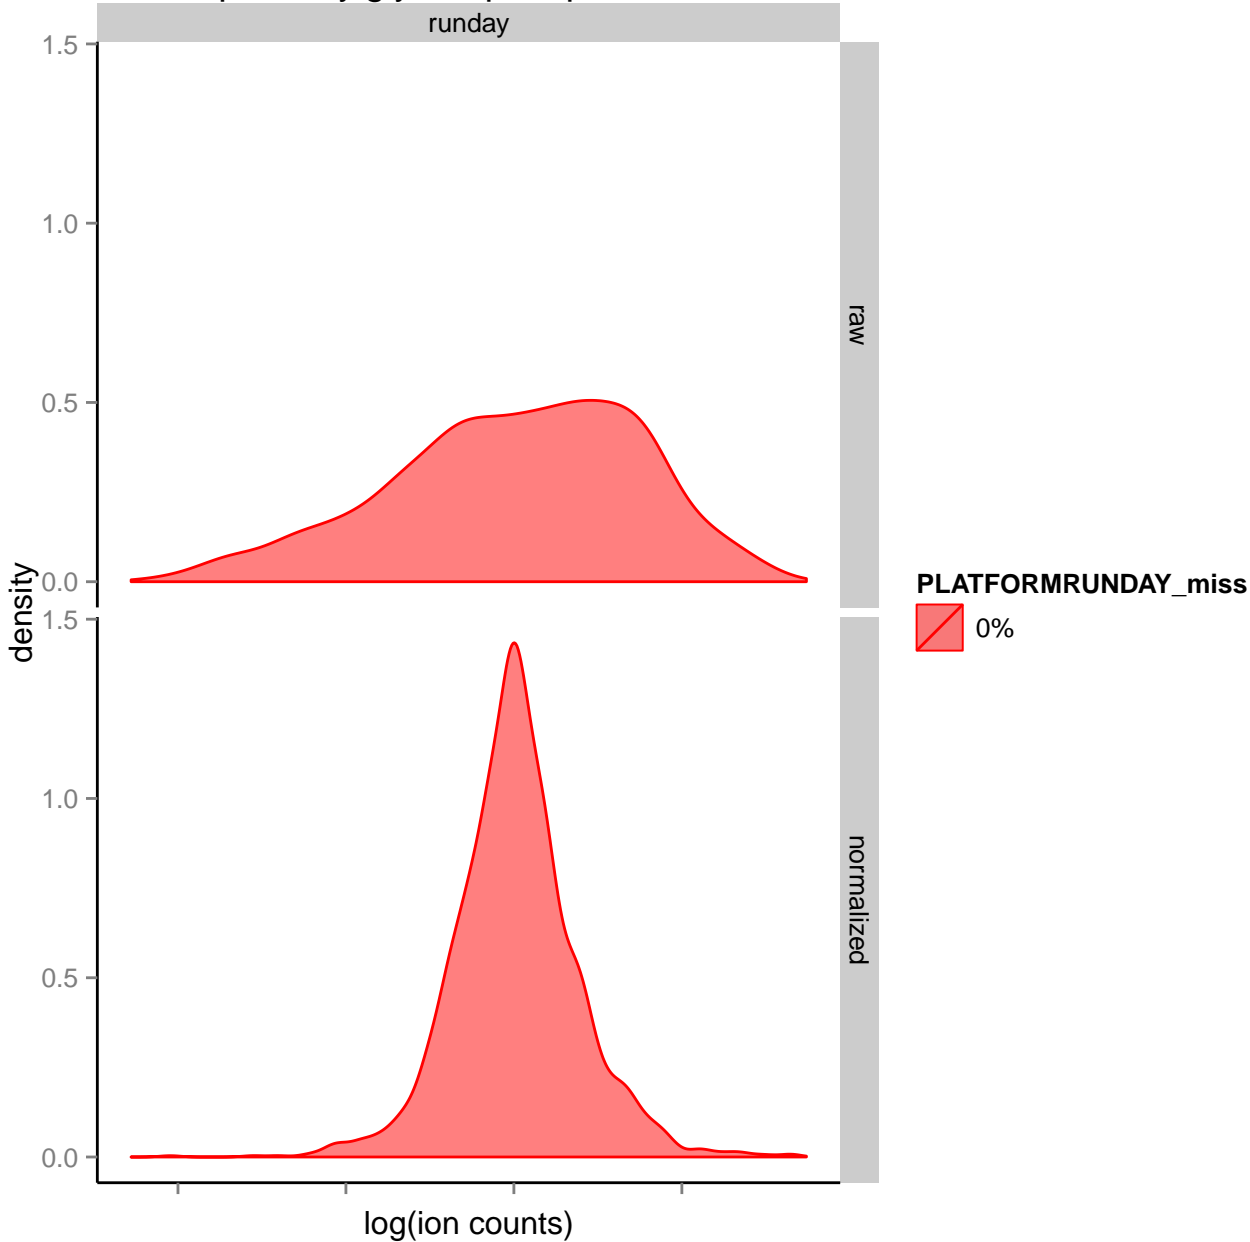

# 2-stearoylglycerophosphocholine\*

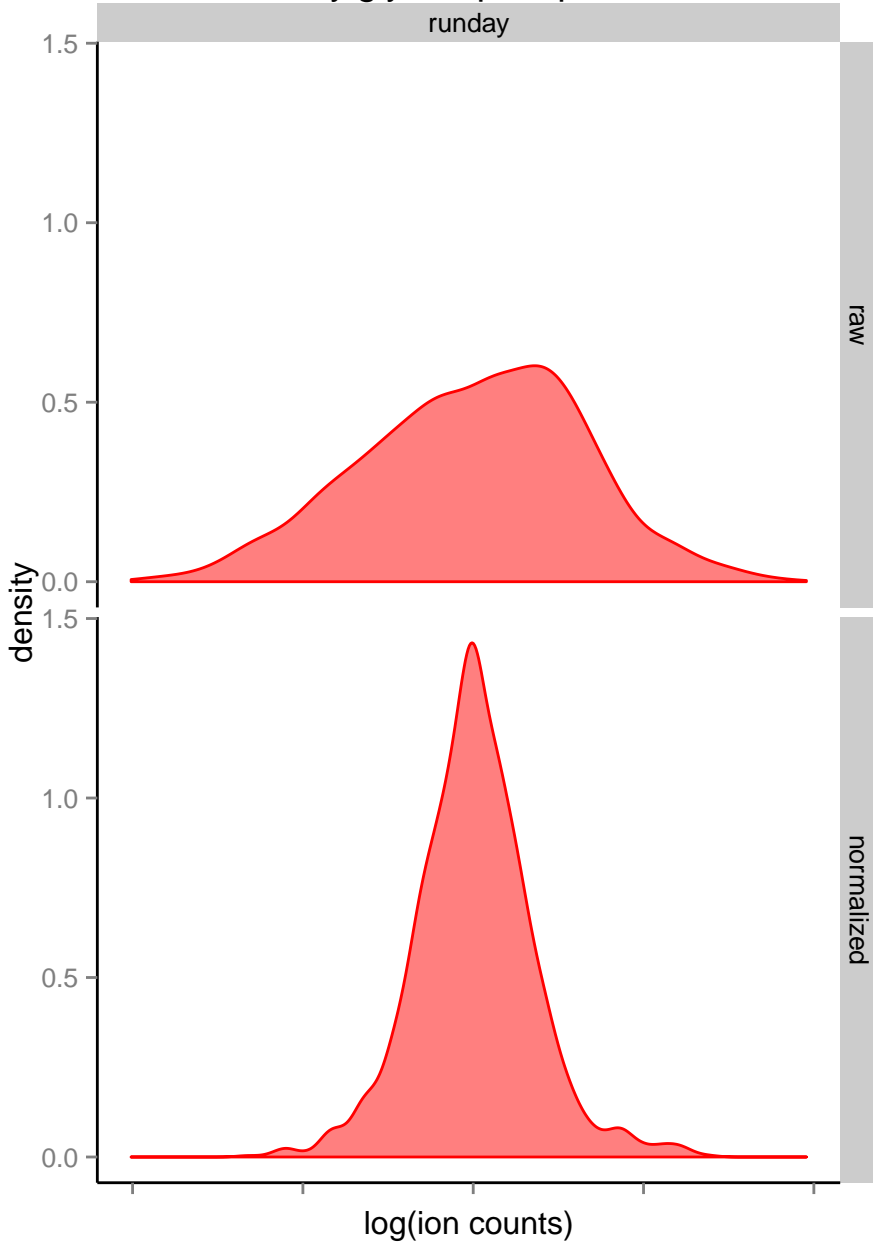

raw

normalized

**PLATFORMRUNDAY\_miss**

0%

# 2-tetradecenoylcarnitine

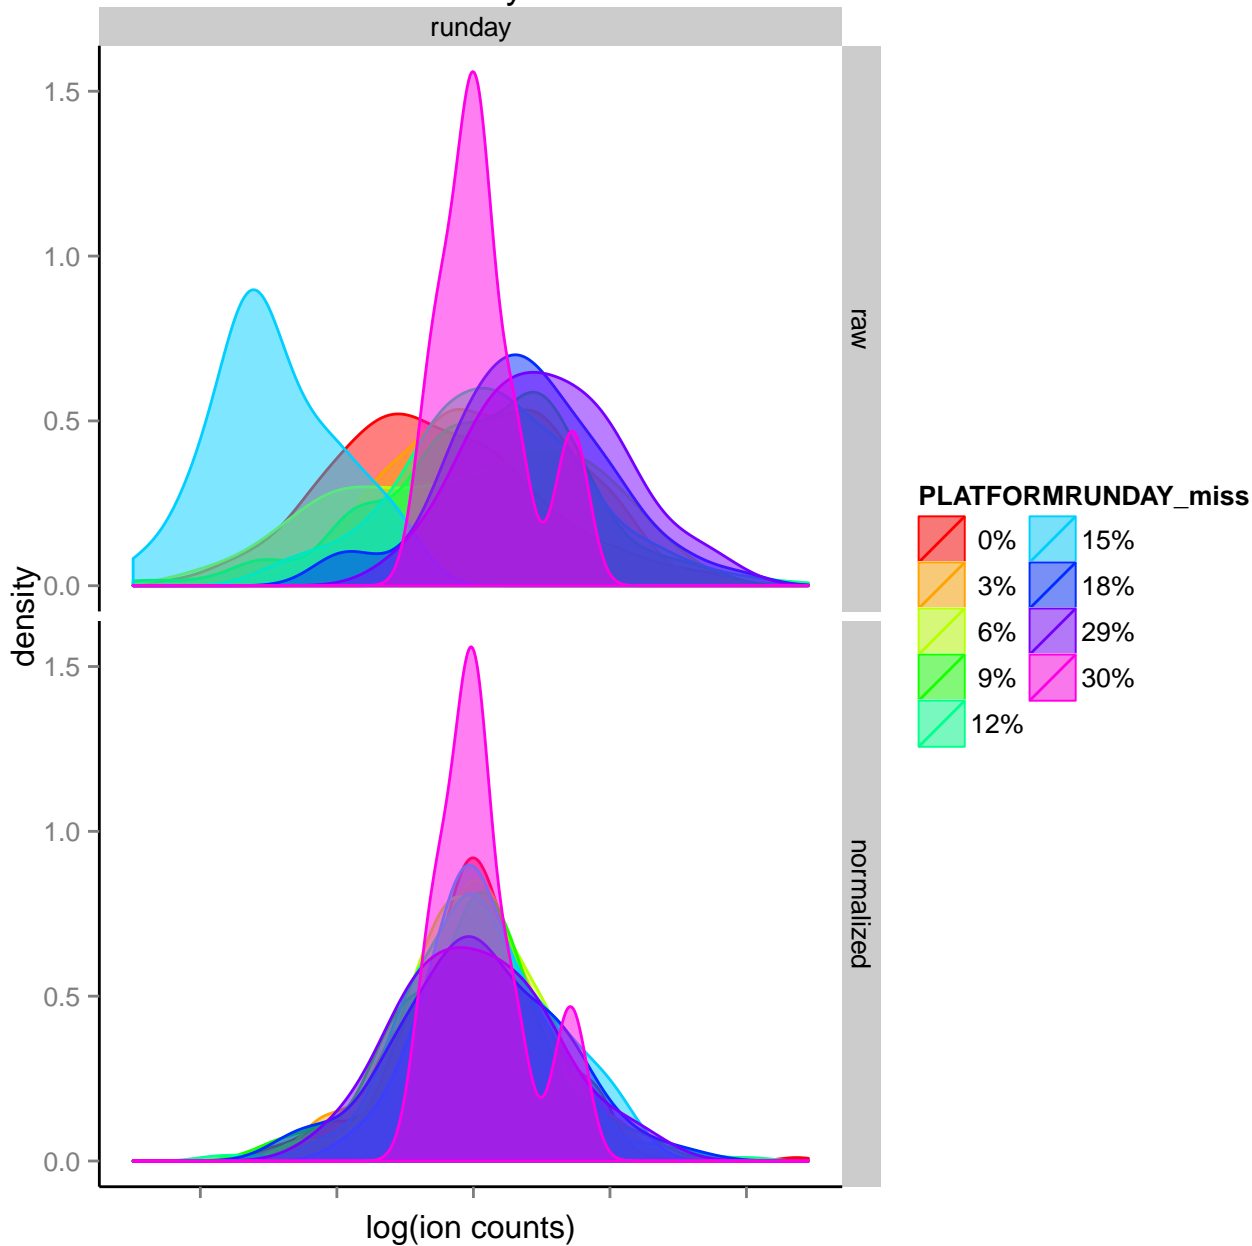

# 3-(3-hydroxyphenyl)propionate

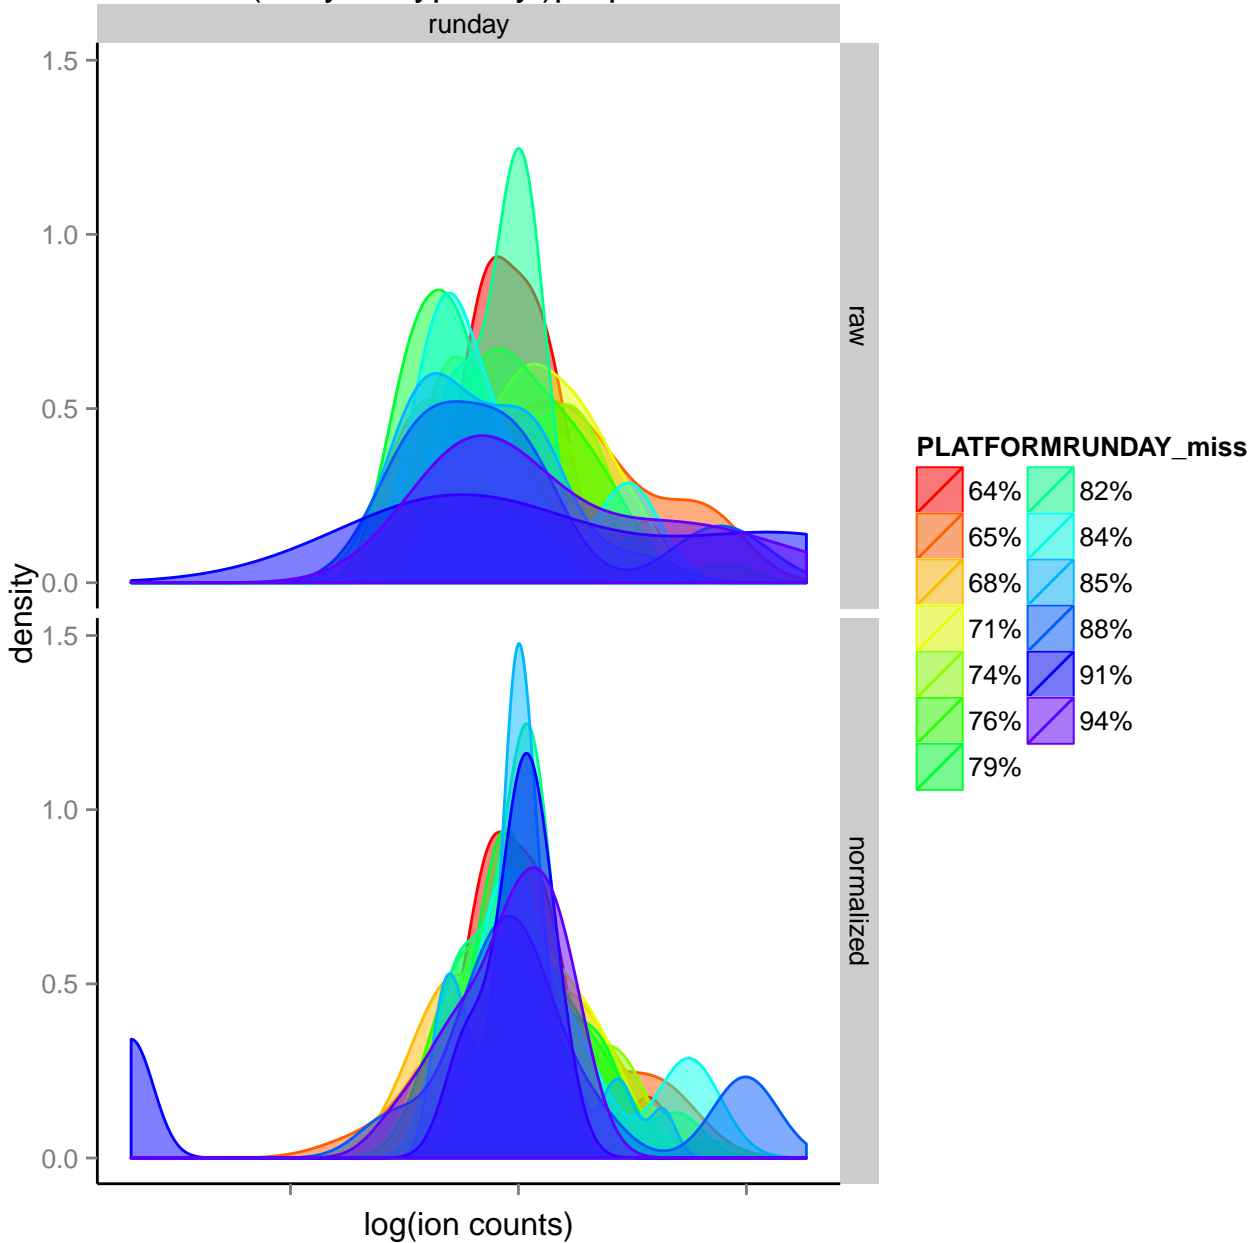

# 3-(4-hydroxyphenyl)lactate

runday

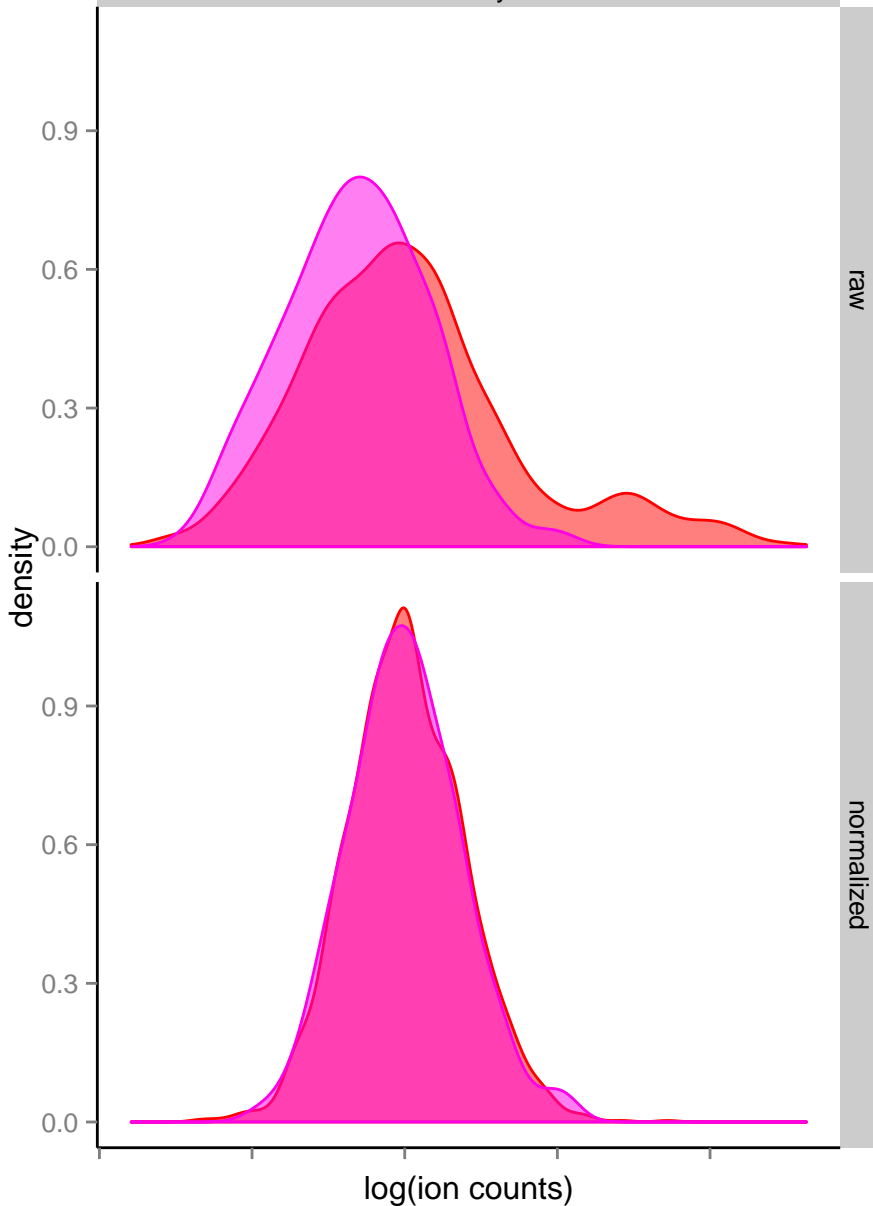

raw

normalized

PLATFORMRUNDAY\_miss

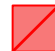

0%

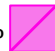

3%

# 3-(cystein-S-yl)acetaminophen\*

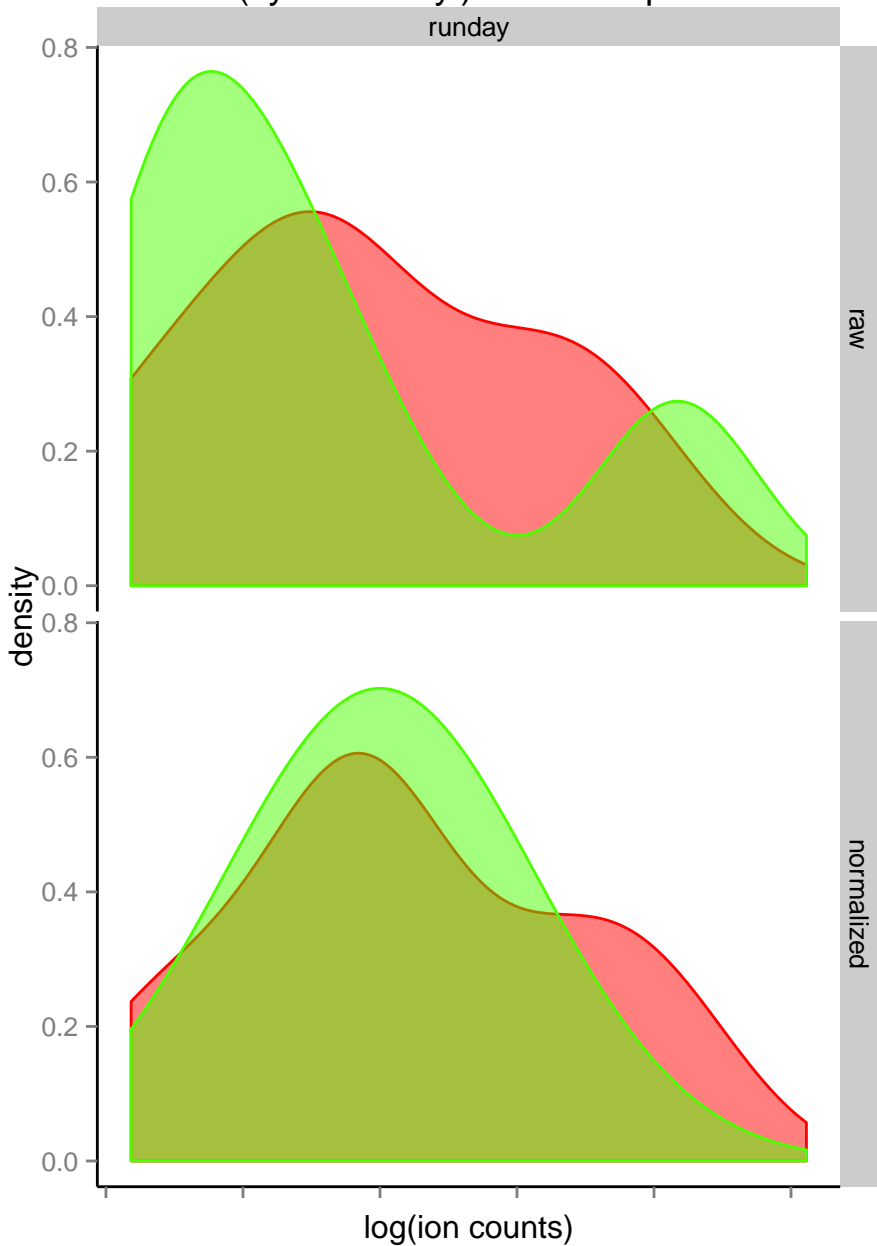

PLATFORMRUNDAY\_miss

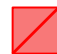

91%

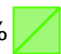

97%

# 3-carboxy-4-methyl-5-propyl-2-furanpropanoate (CMPF)

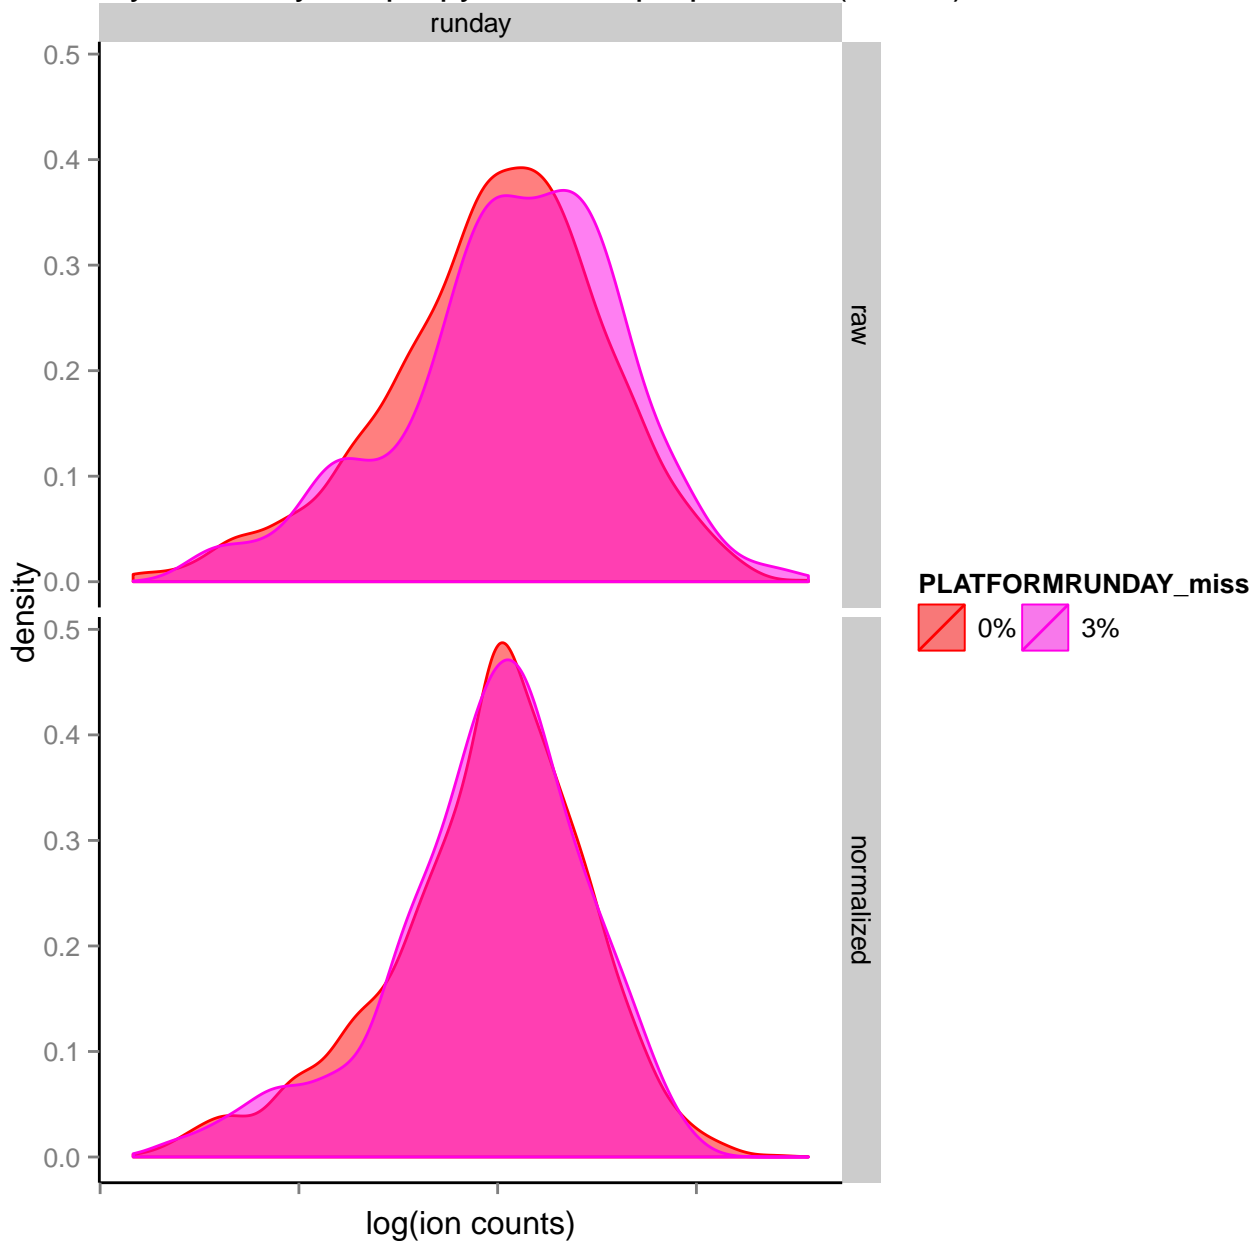



# 3-dehydrocarnitine\*

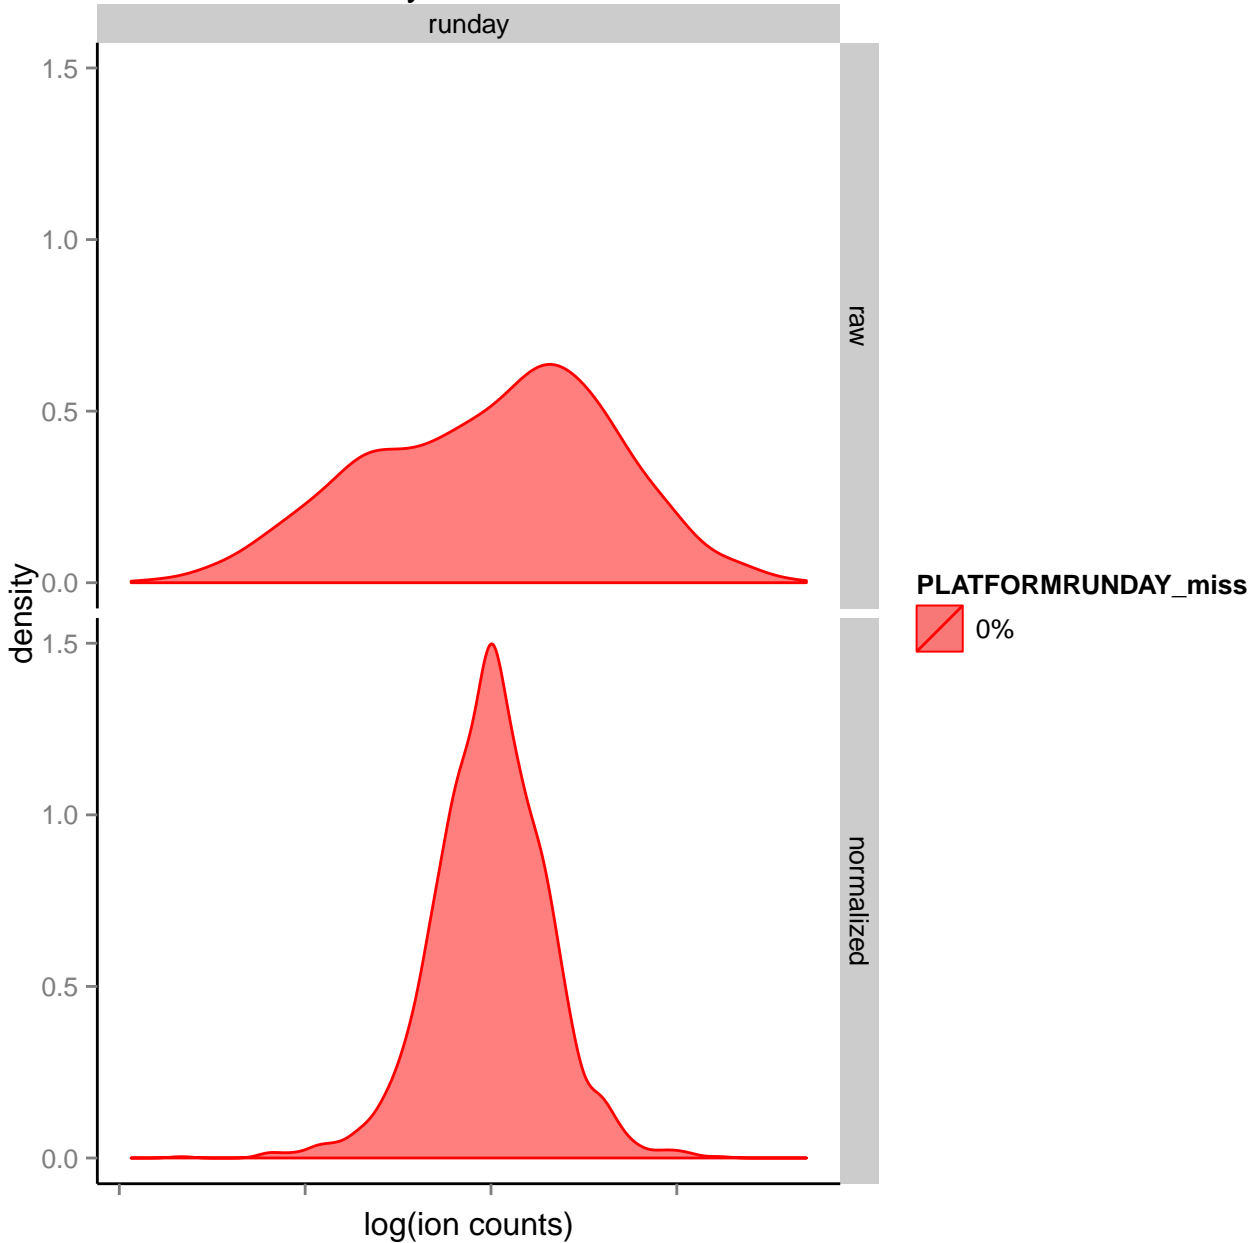

# 3-ethylphenylsulfate\*

runday

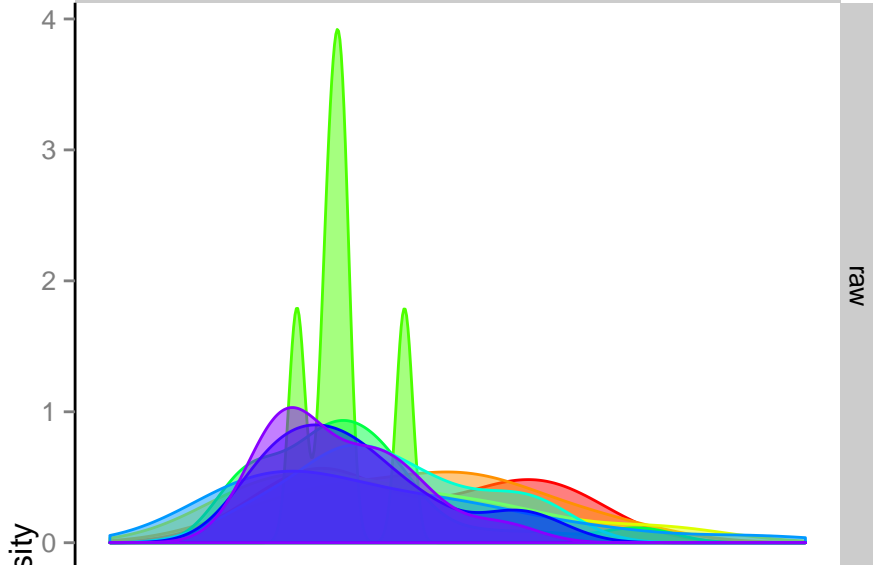

raw

## PLATFORMRUNDAY\_miss

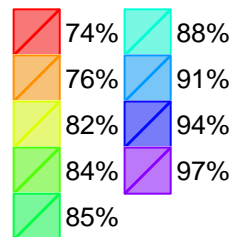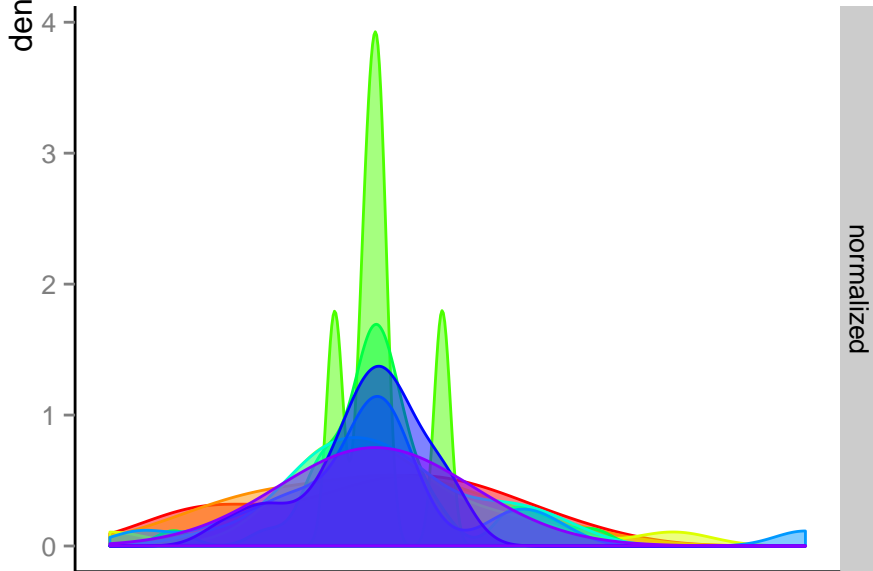

normalized

log(ion counts)

# 3-hydroxy-2-ethylpropionate

runday

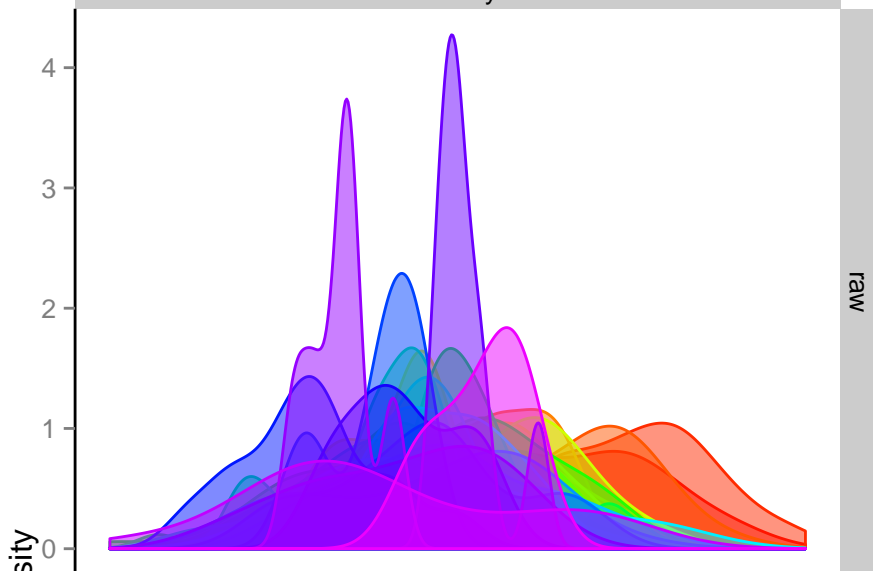

raw

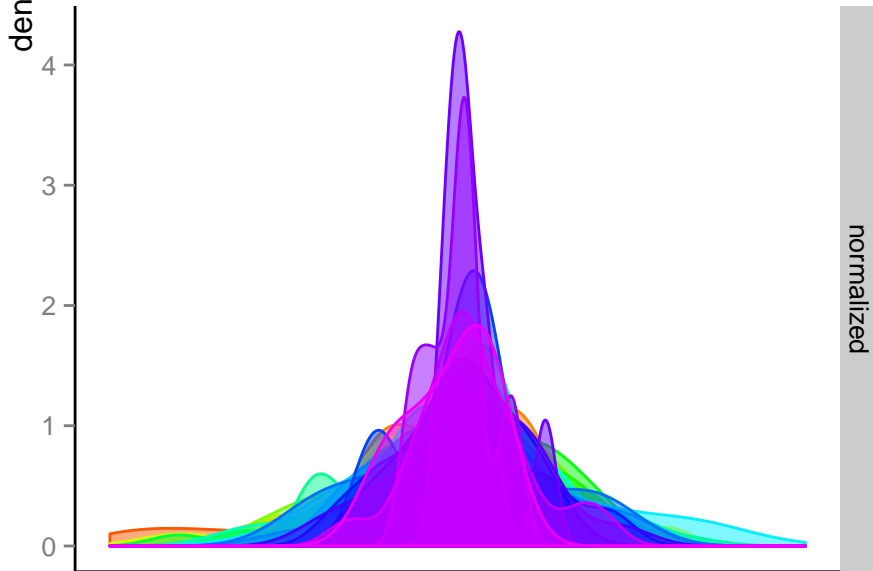

normalized

log(ion counts)

## PLATFORMRUNDAY\_miss

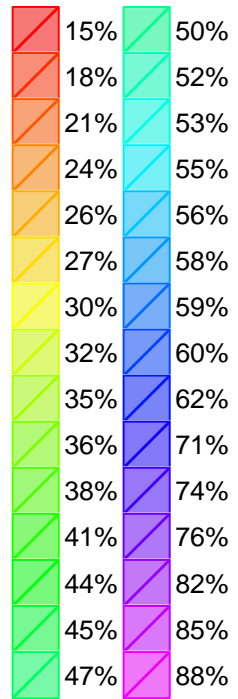

# 3-hydroxybutyrate (BHBA)

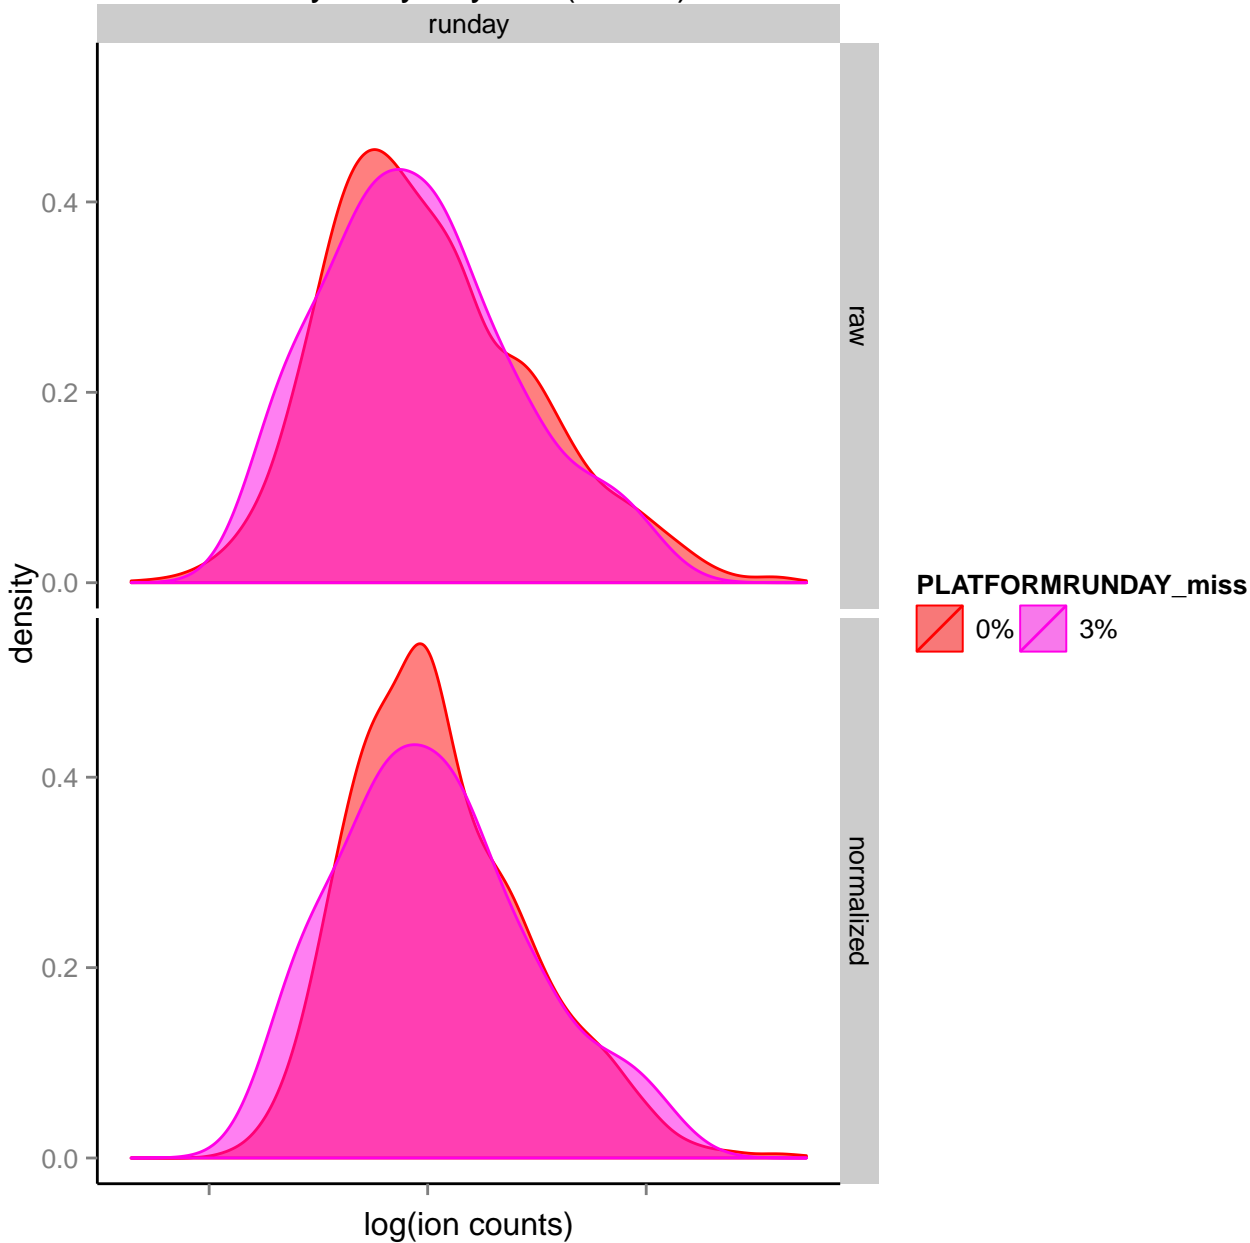

# 3-indoxyl sulfate

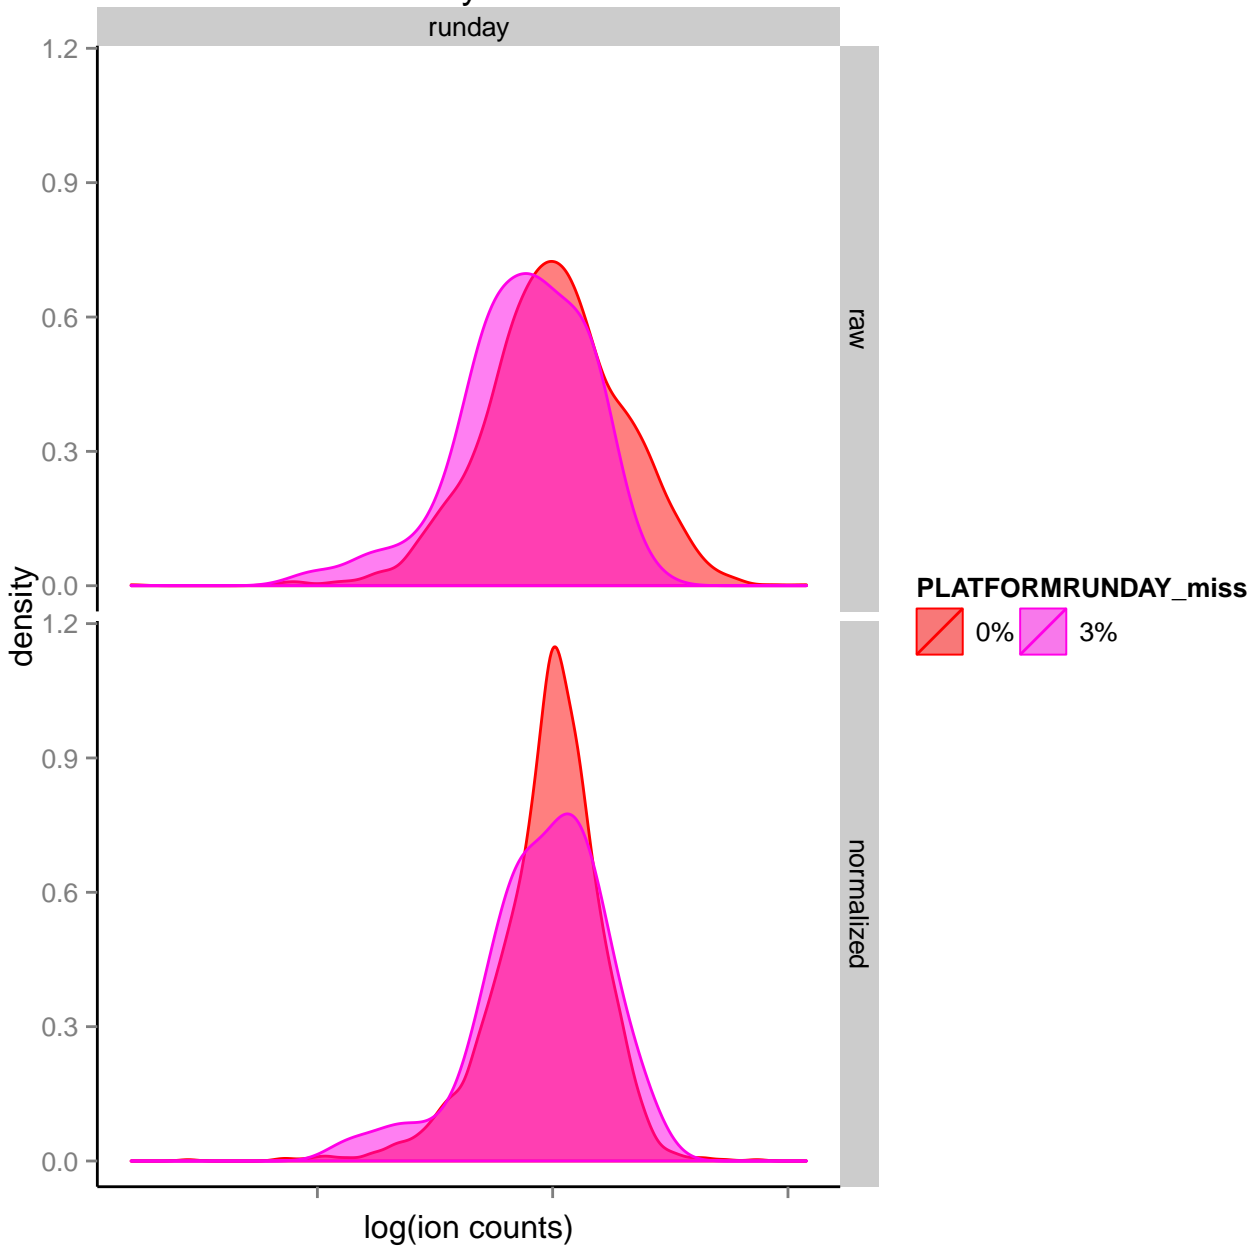

# 3-methoxytyrosine

runday

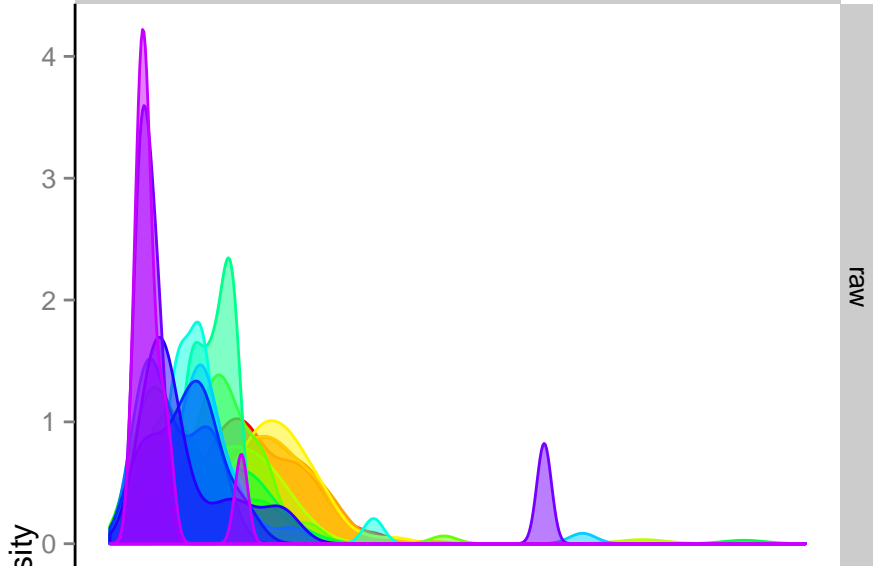

raw

## PLATFORMRUNDAY\_miss

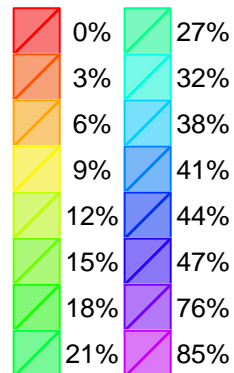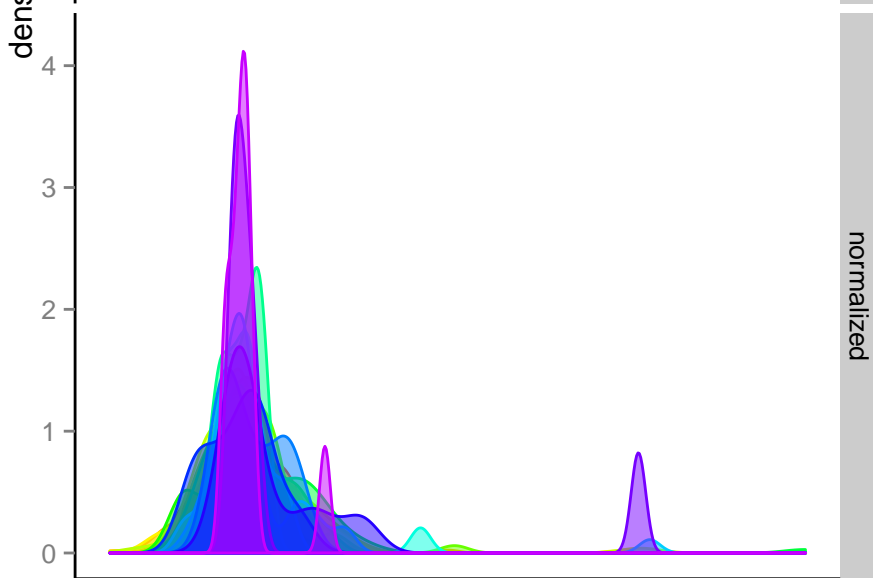

normalized

log(ion counts)

# 3-methyl-2-oxobutyrate

runday

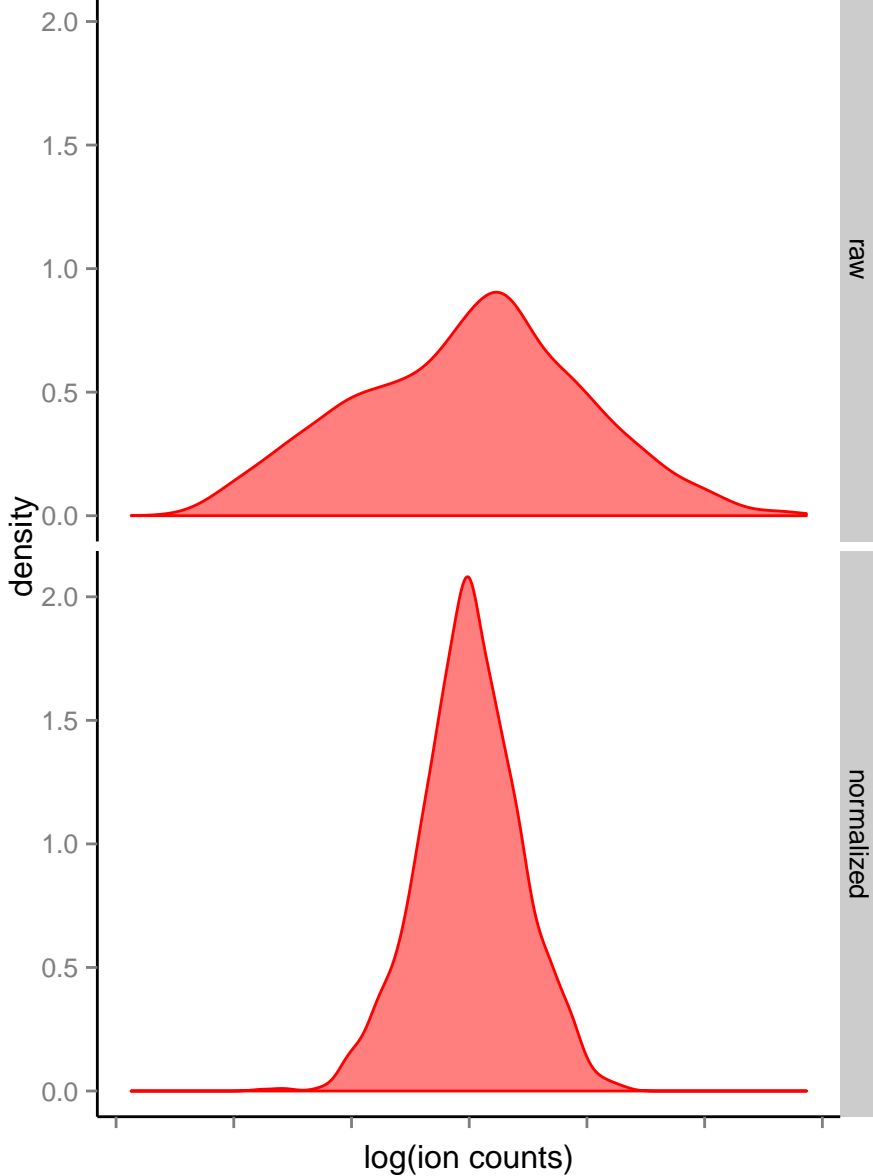

raw

normalized

**PLATFORMRUNDAY\_miss**

0%

# 3-methyl-2-oxovalerate

runday

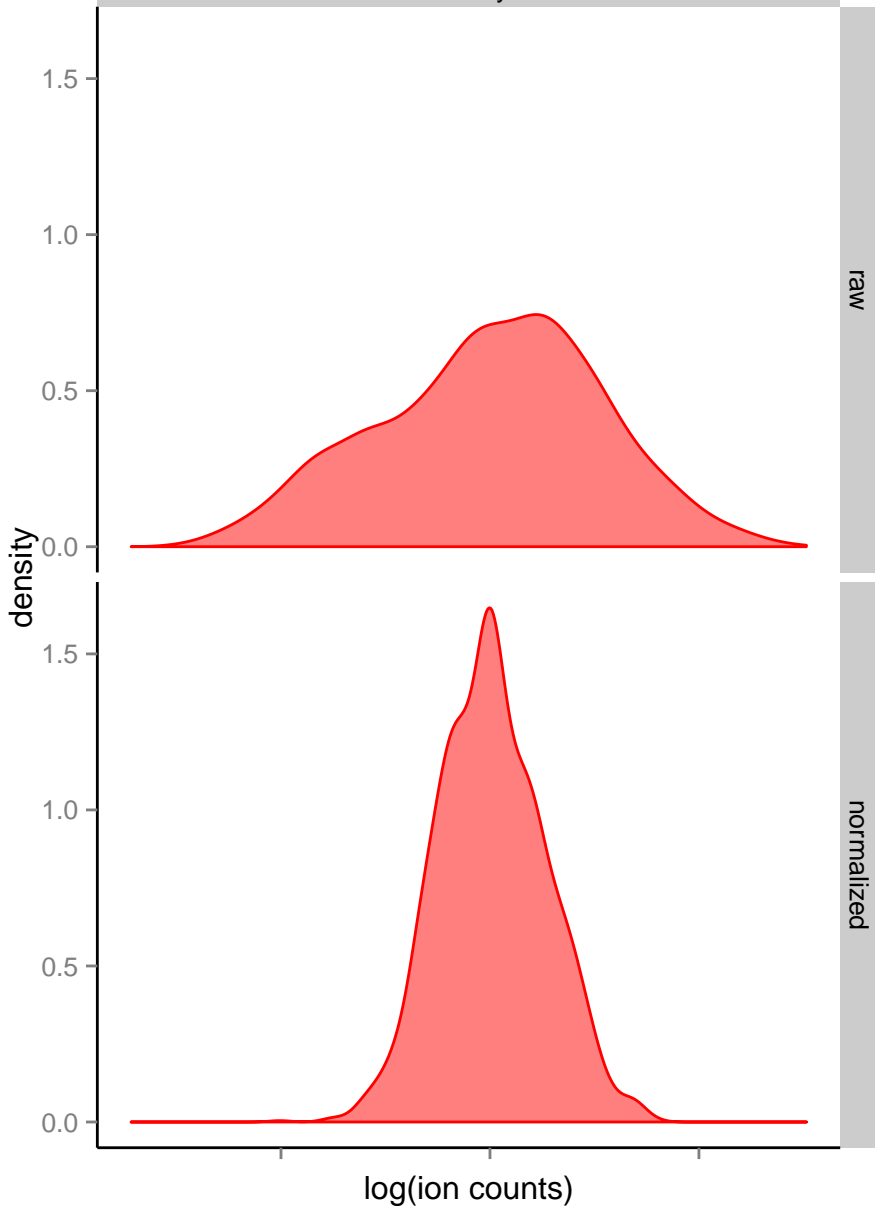

raw

normalized

PLATFORMRUNDAY\_miss

0%

log(ion counts)



# 3-methylhistidine

runday

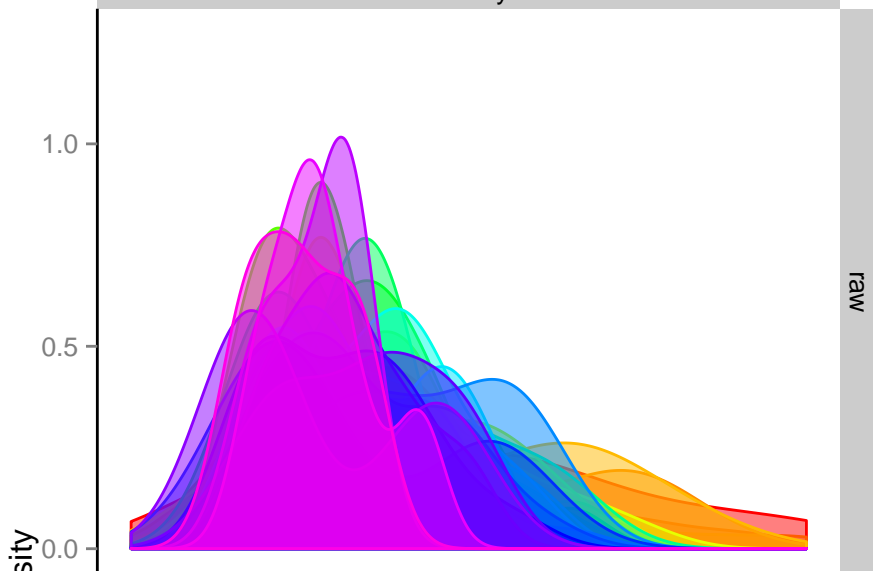

raw

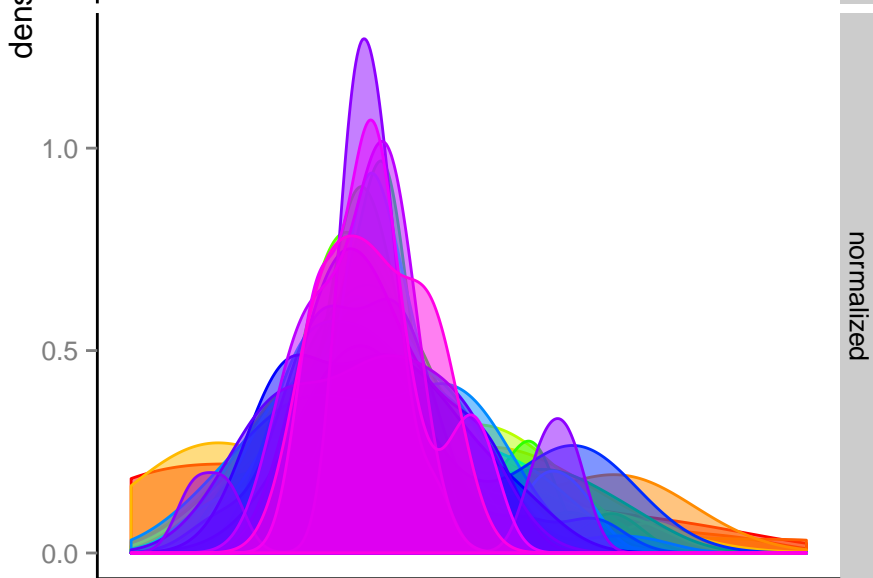

normalized

## PLATFORMRUNDAY\_miss

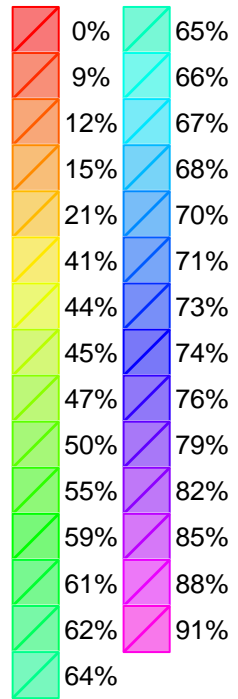

log(ion counts)

# 3-methylxanthine

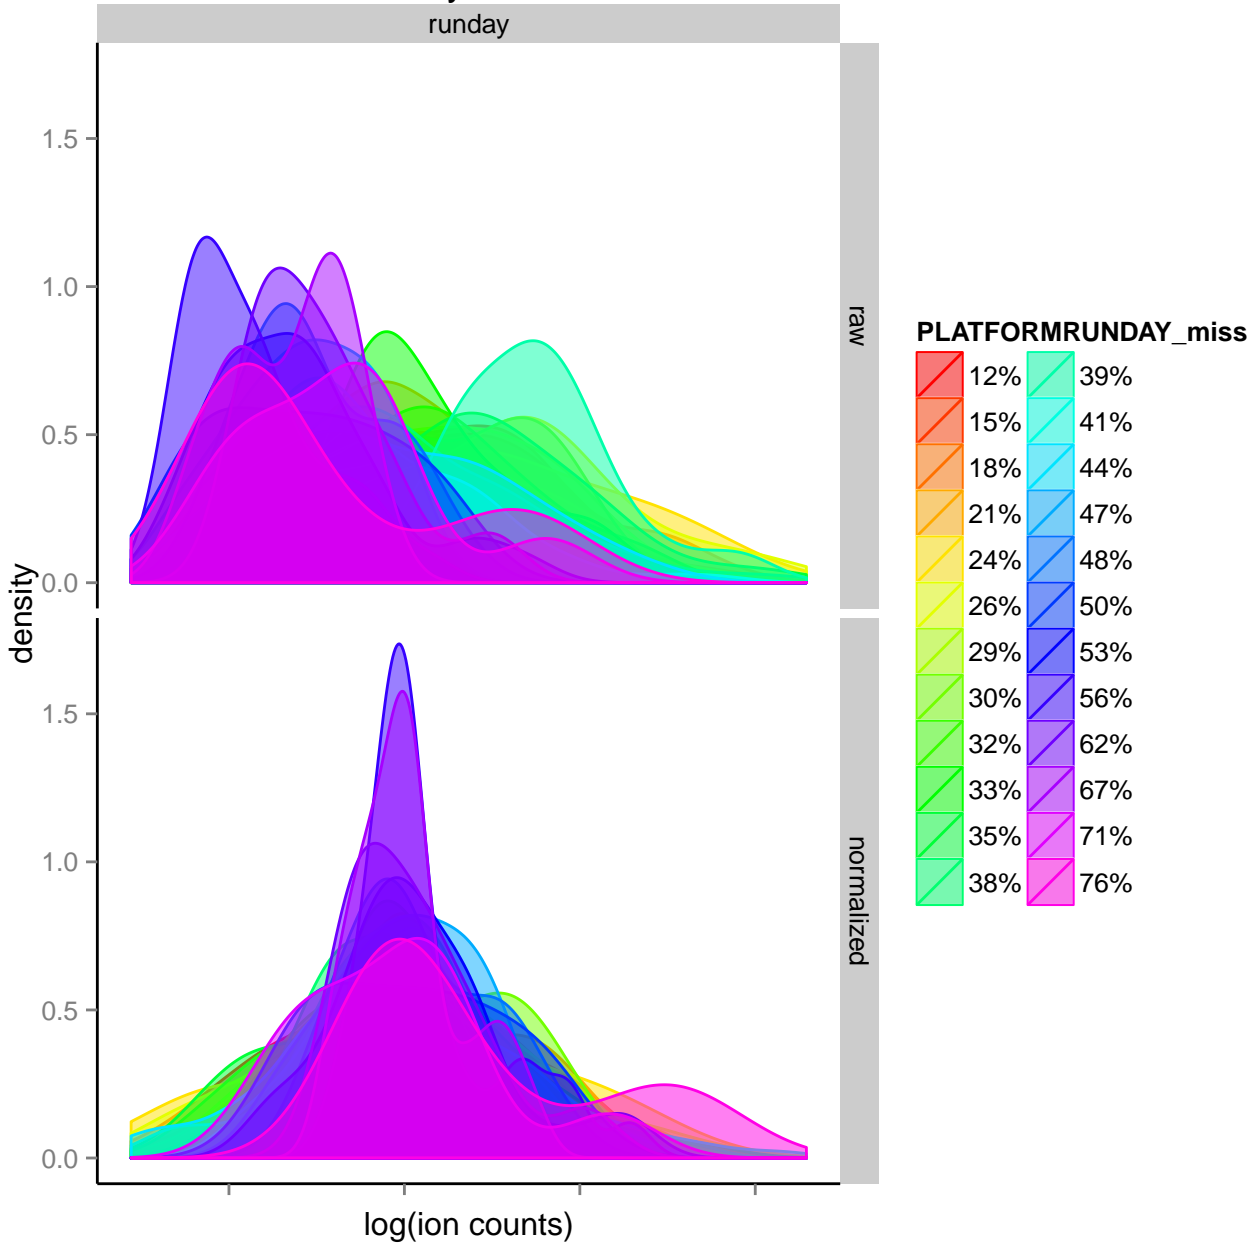

# 3-phenylpropionate (hydrocinnamate)

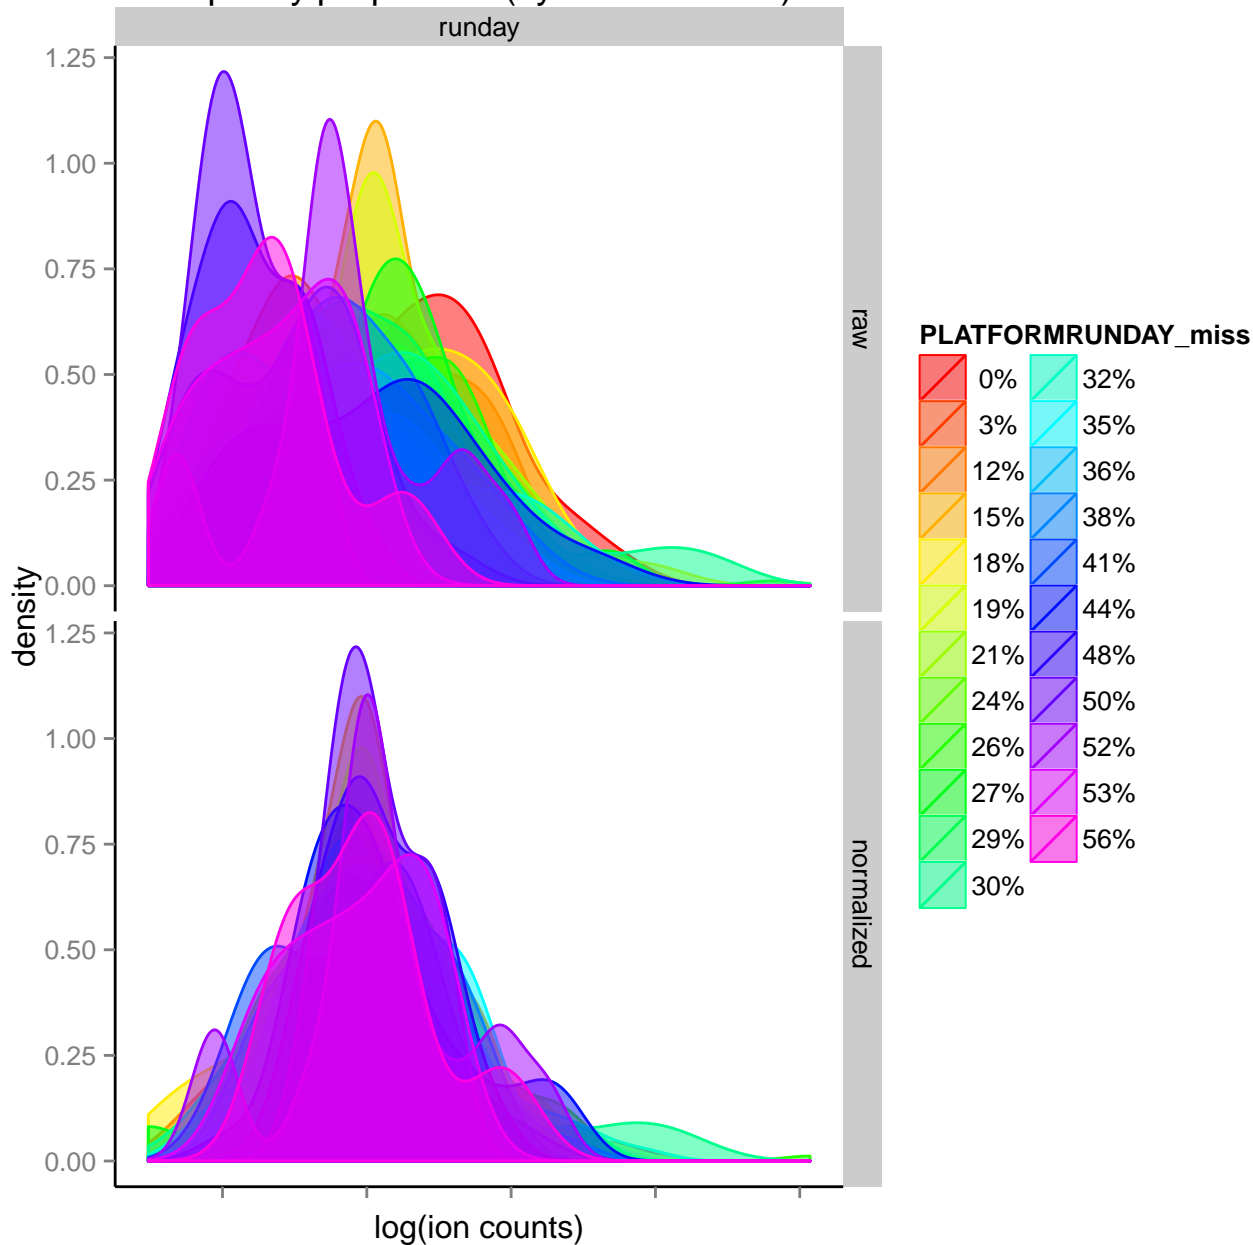

# 4-acetamidobutanoate

runday

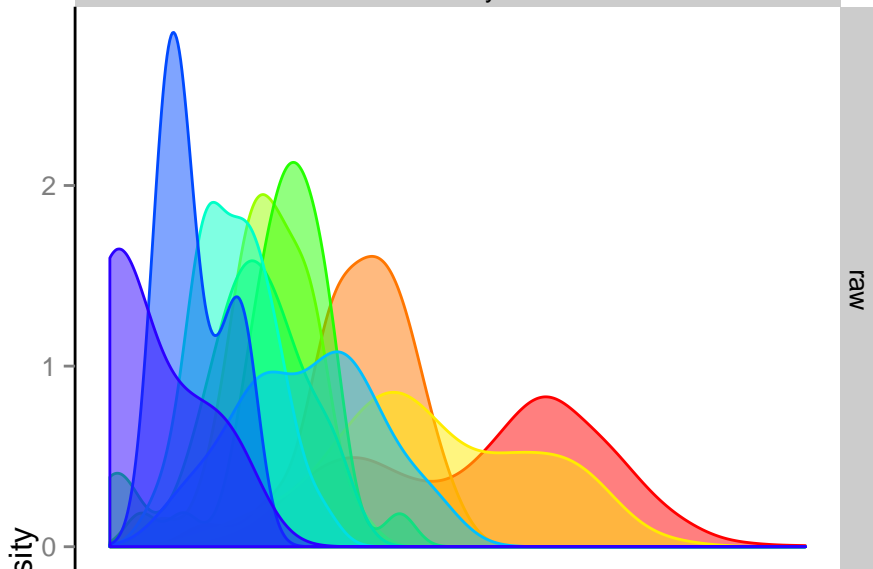

raw

## PLATFORMRUNDAY\_miss

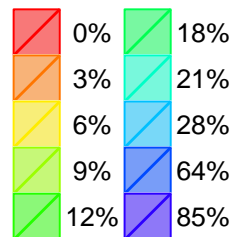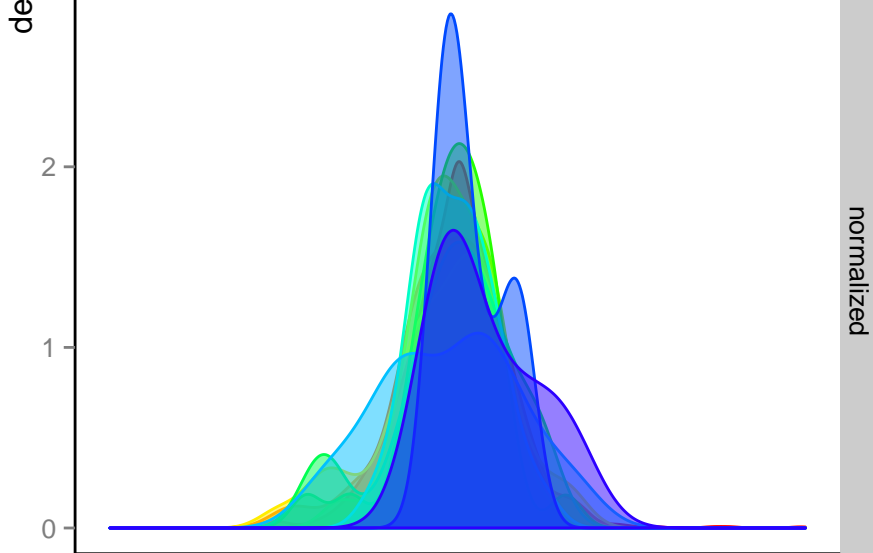

normalized

log(ion counts)

# 4-acetaminophen sulfate

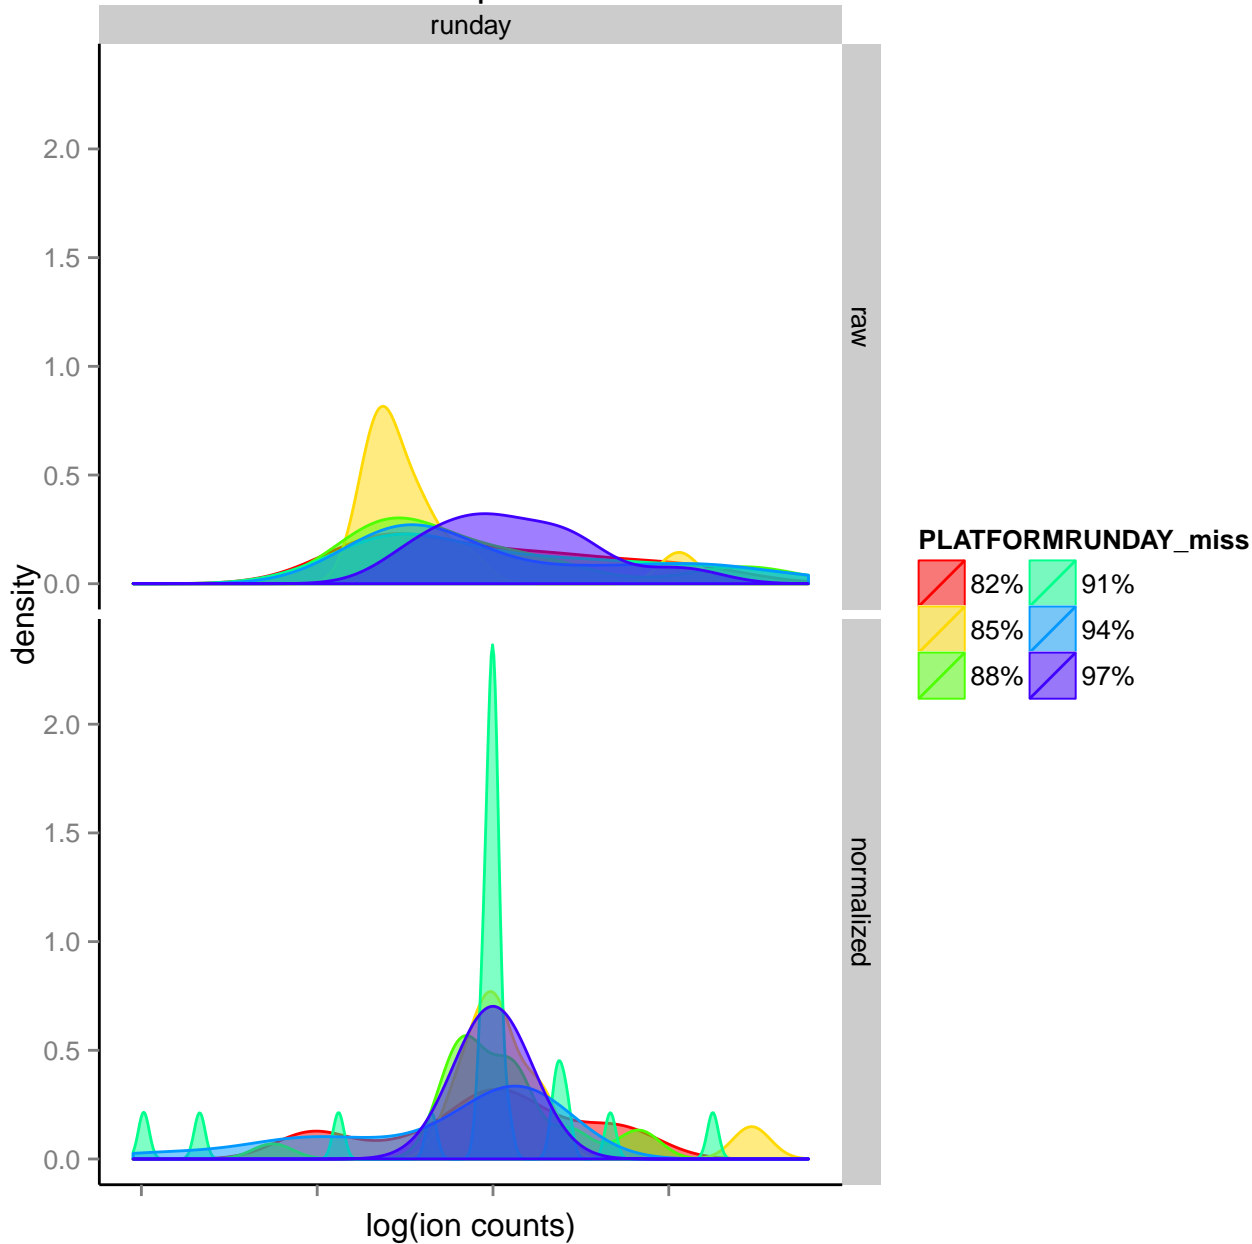

# 4-ethylphenylsulfate

runday

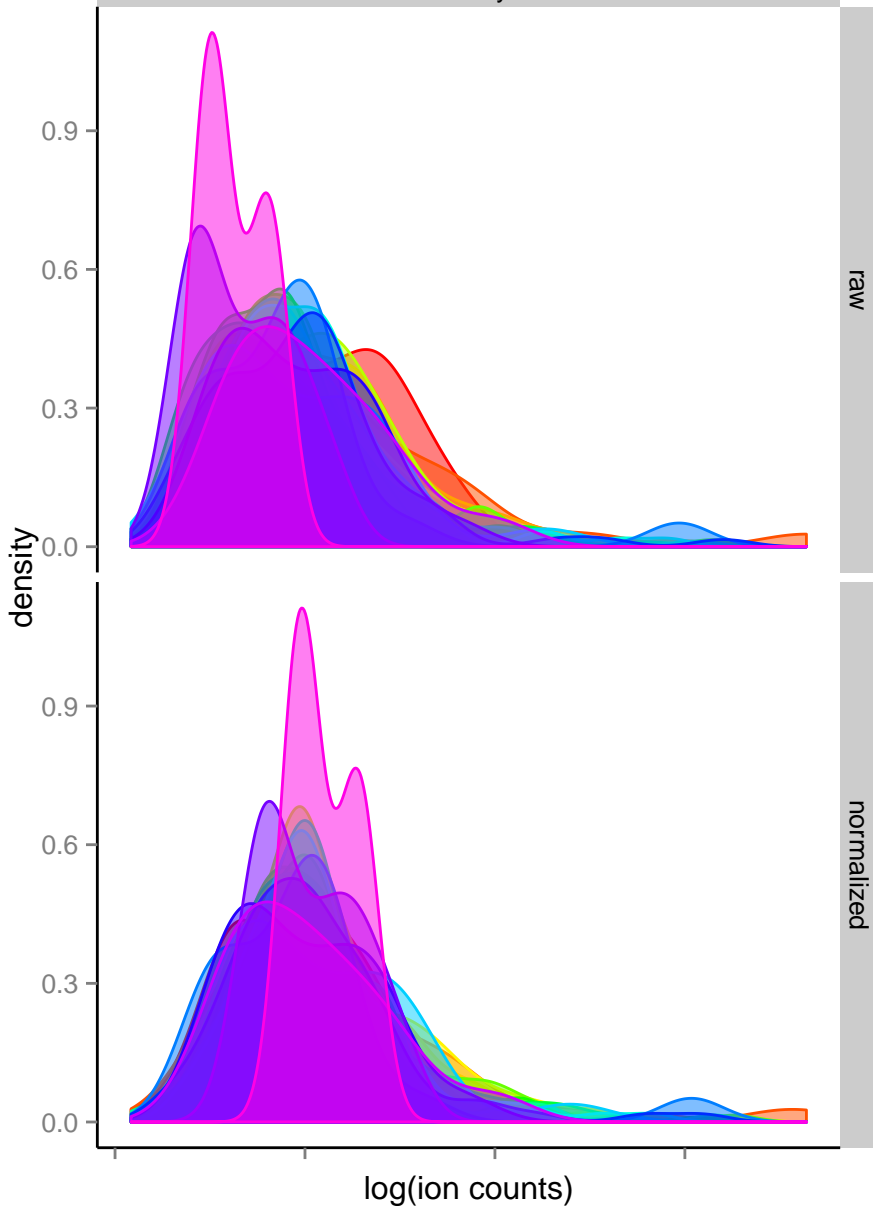

**PLATFORMRUNDAY\_miss**

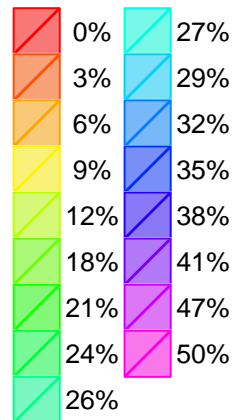

# 4-hydroxyphenylacetate

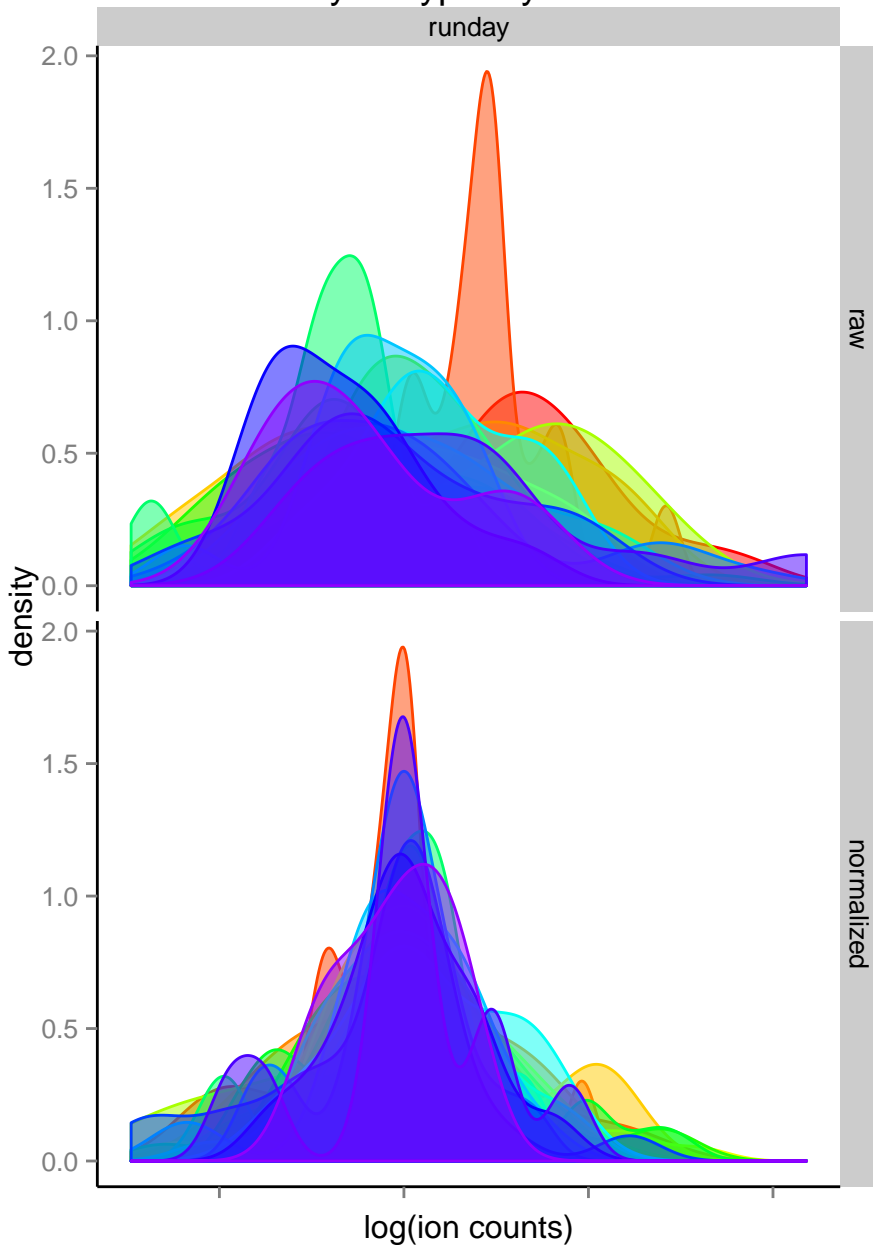

## PLATFORMRUNDAY\_miss

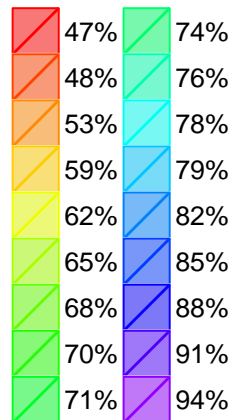

# 4-methyl-2-oxopentanoate

runday

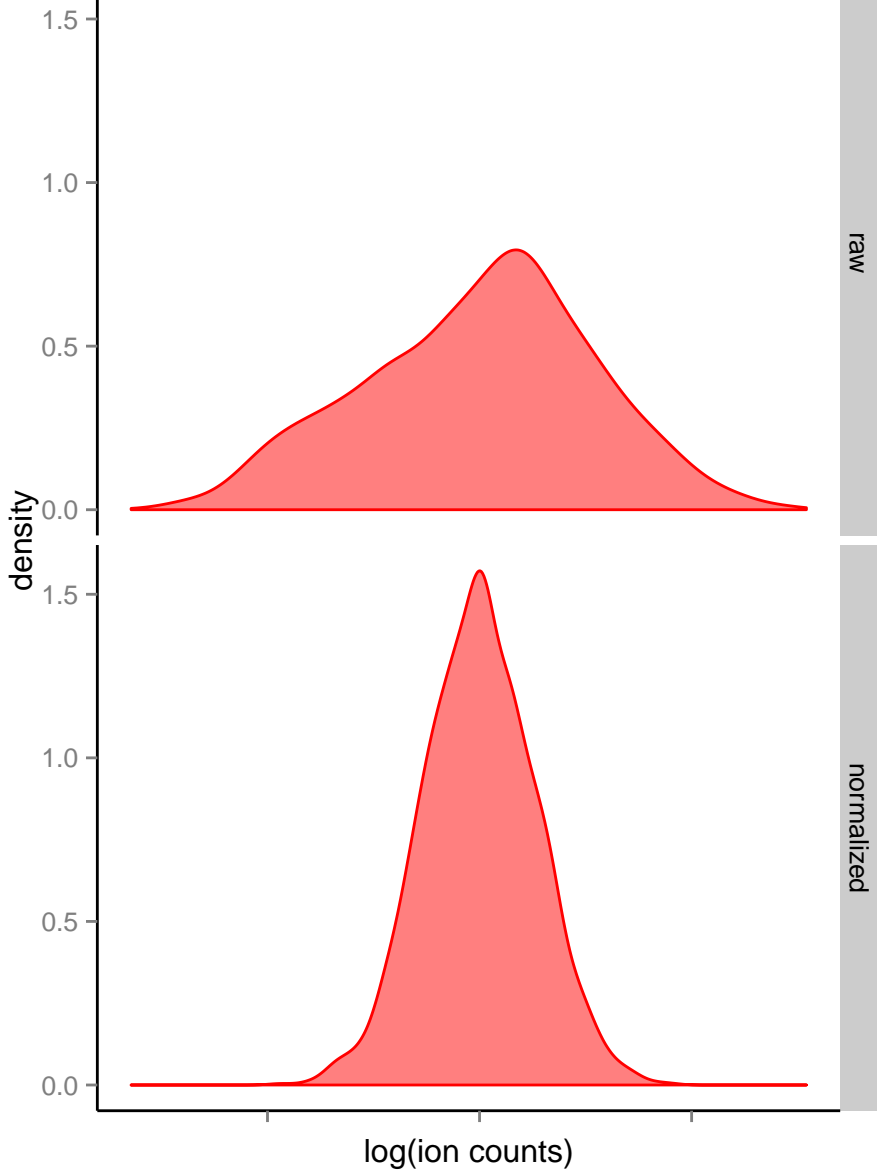

raw

normalized

**PLATFORMRUNDAY\_miss**

0%



# 4-vinylphenol sulfate

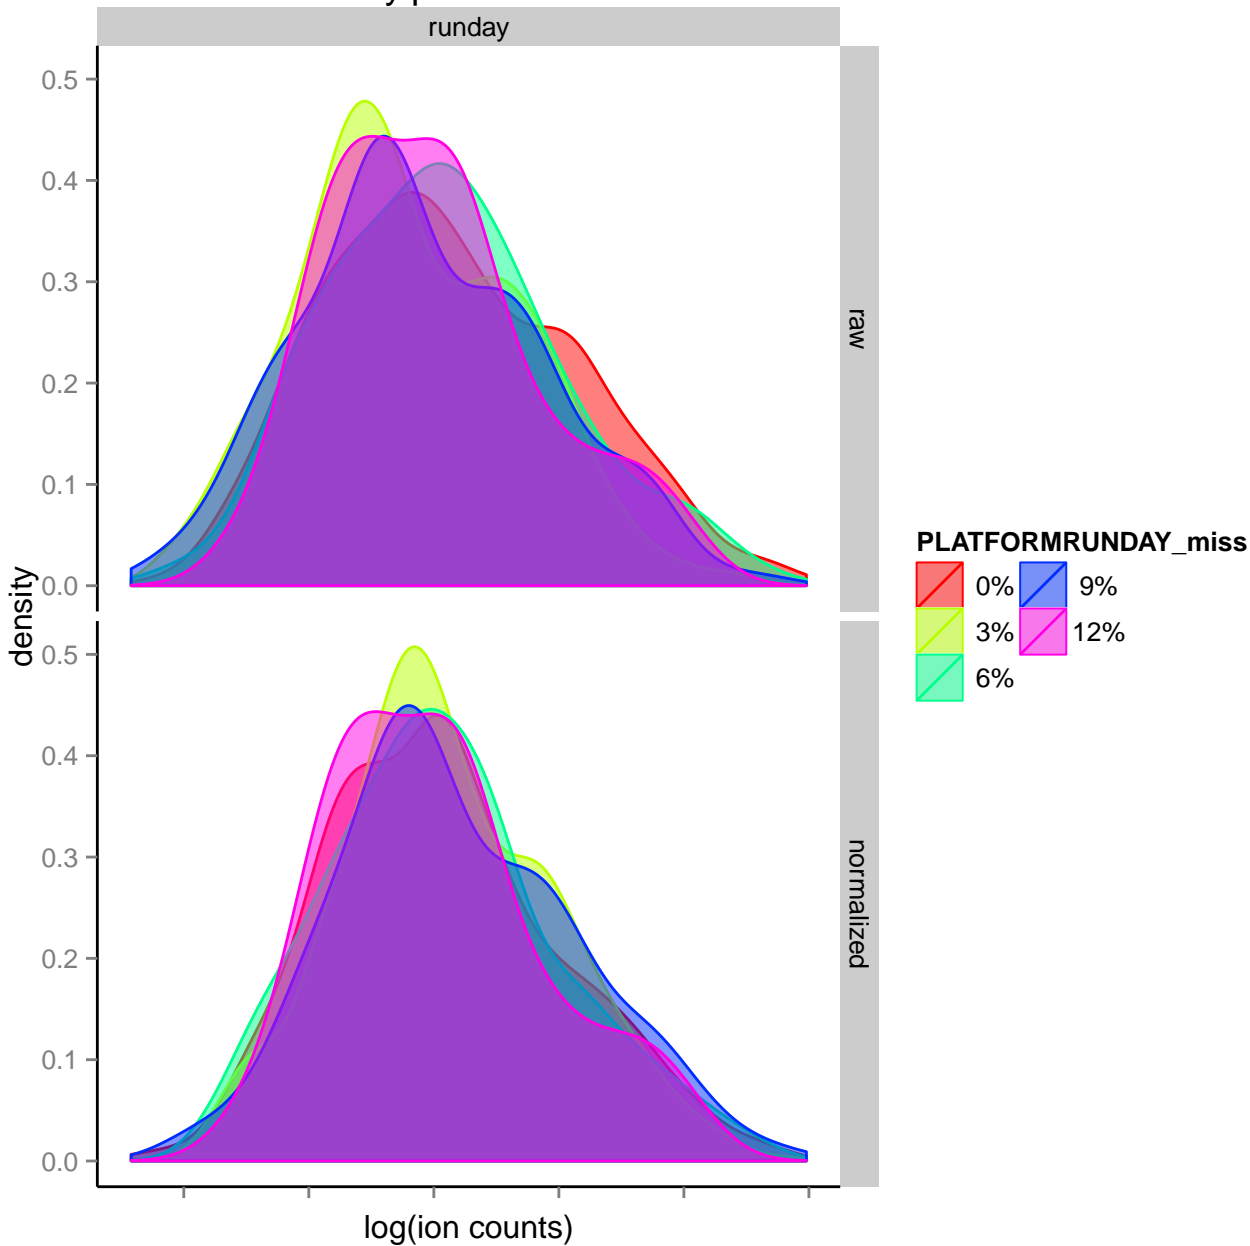

# 5-dodecenoate (12:1n7)

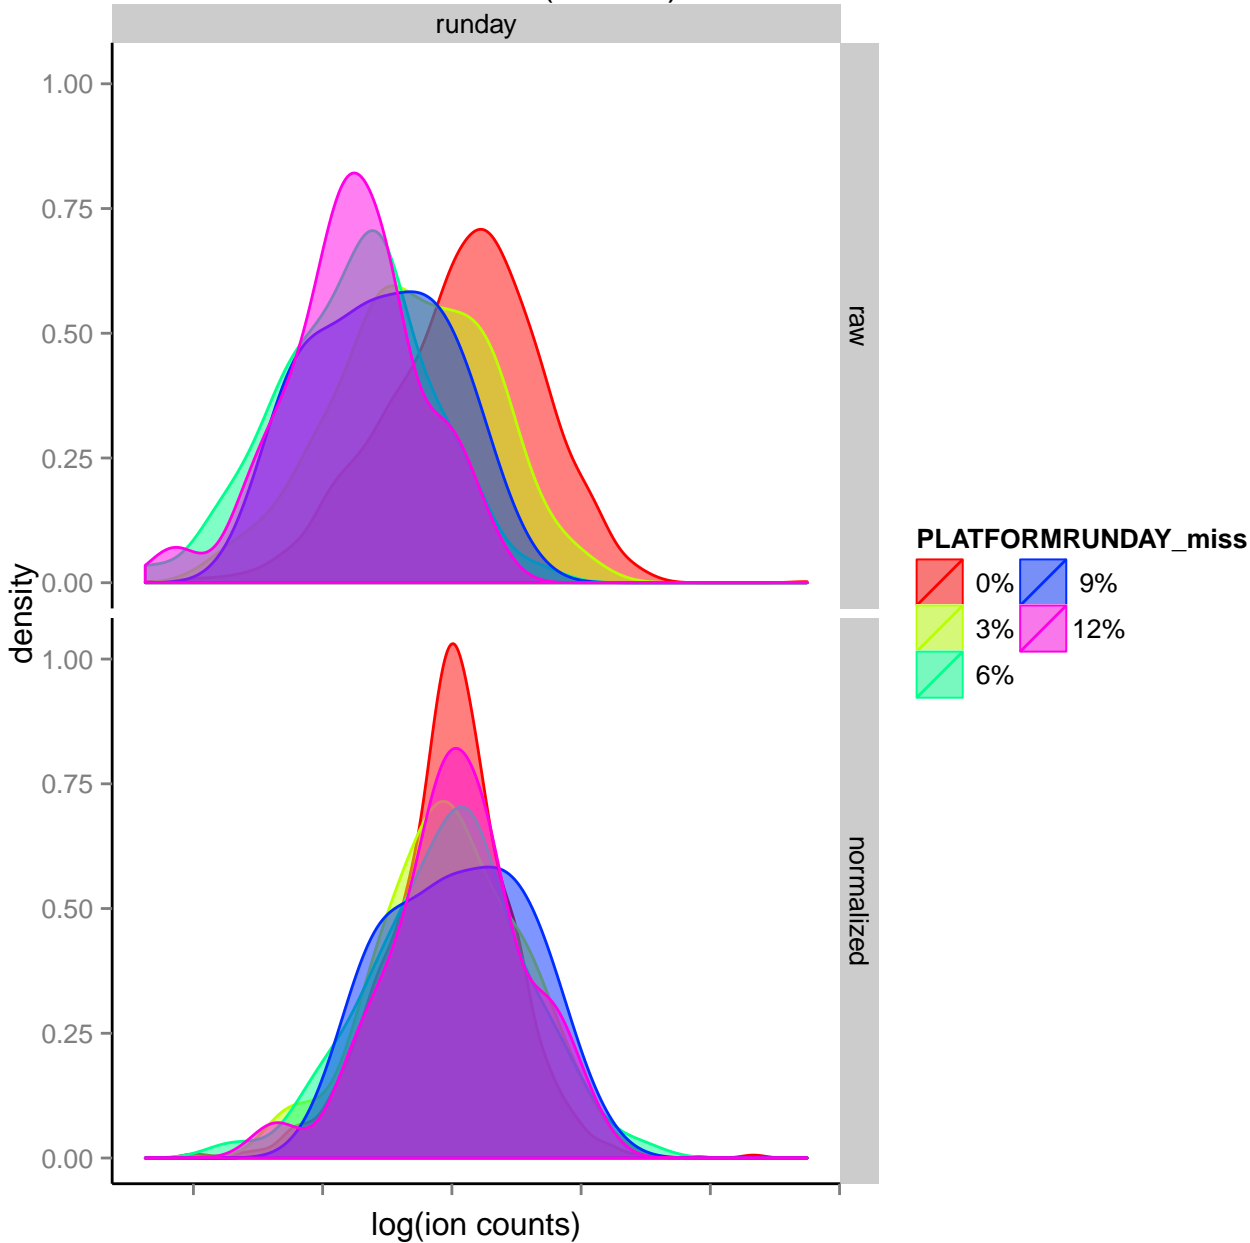

# 5-oxoproline

runday

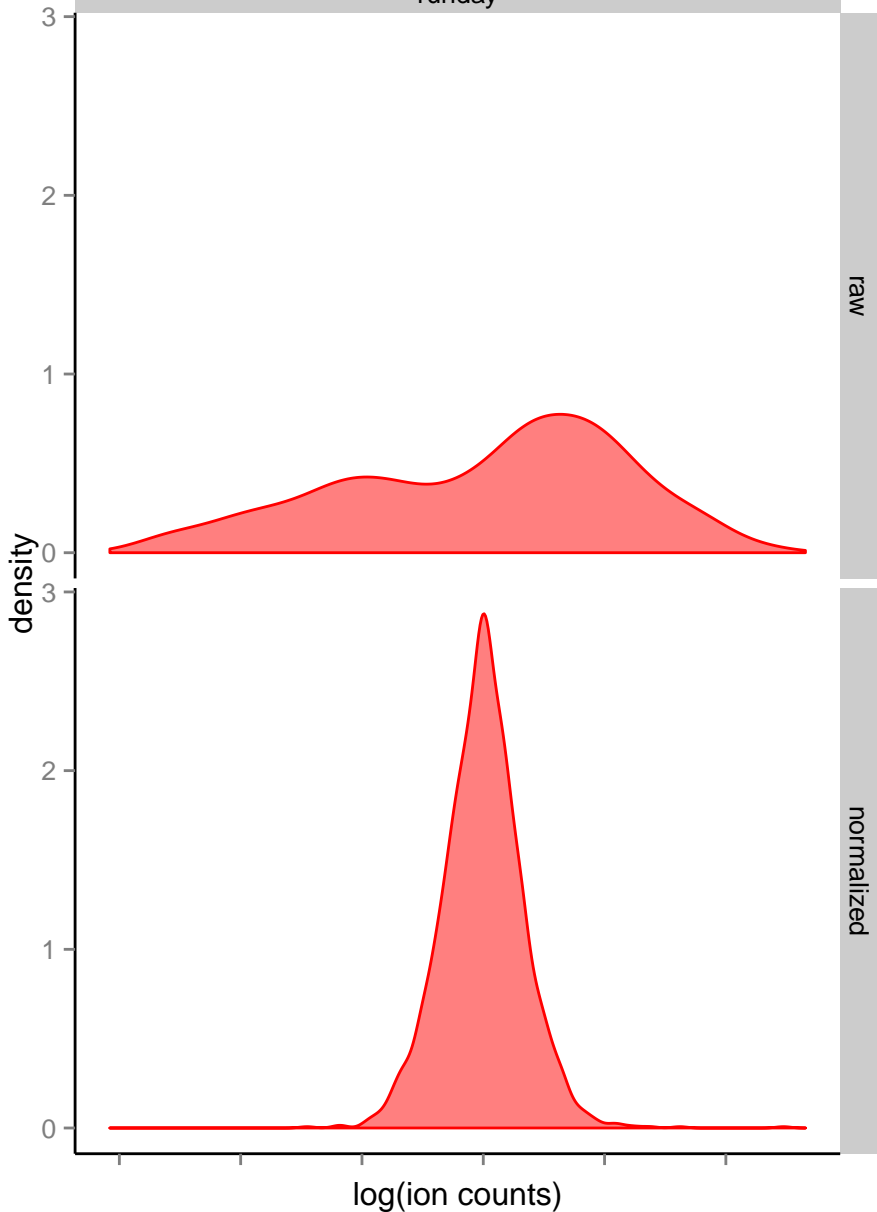

**PLATFORMRUNDAY\_miss**

0%

# 7-alpha-hydroxy-3-oxo-4-cholestenoate (7-Hoca)

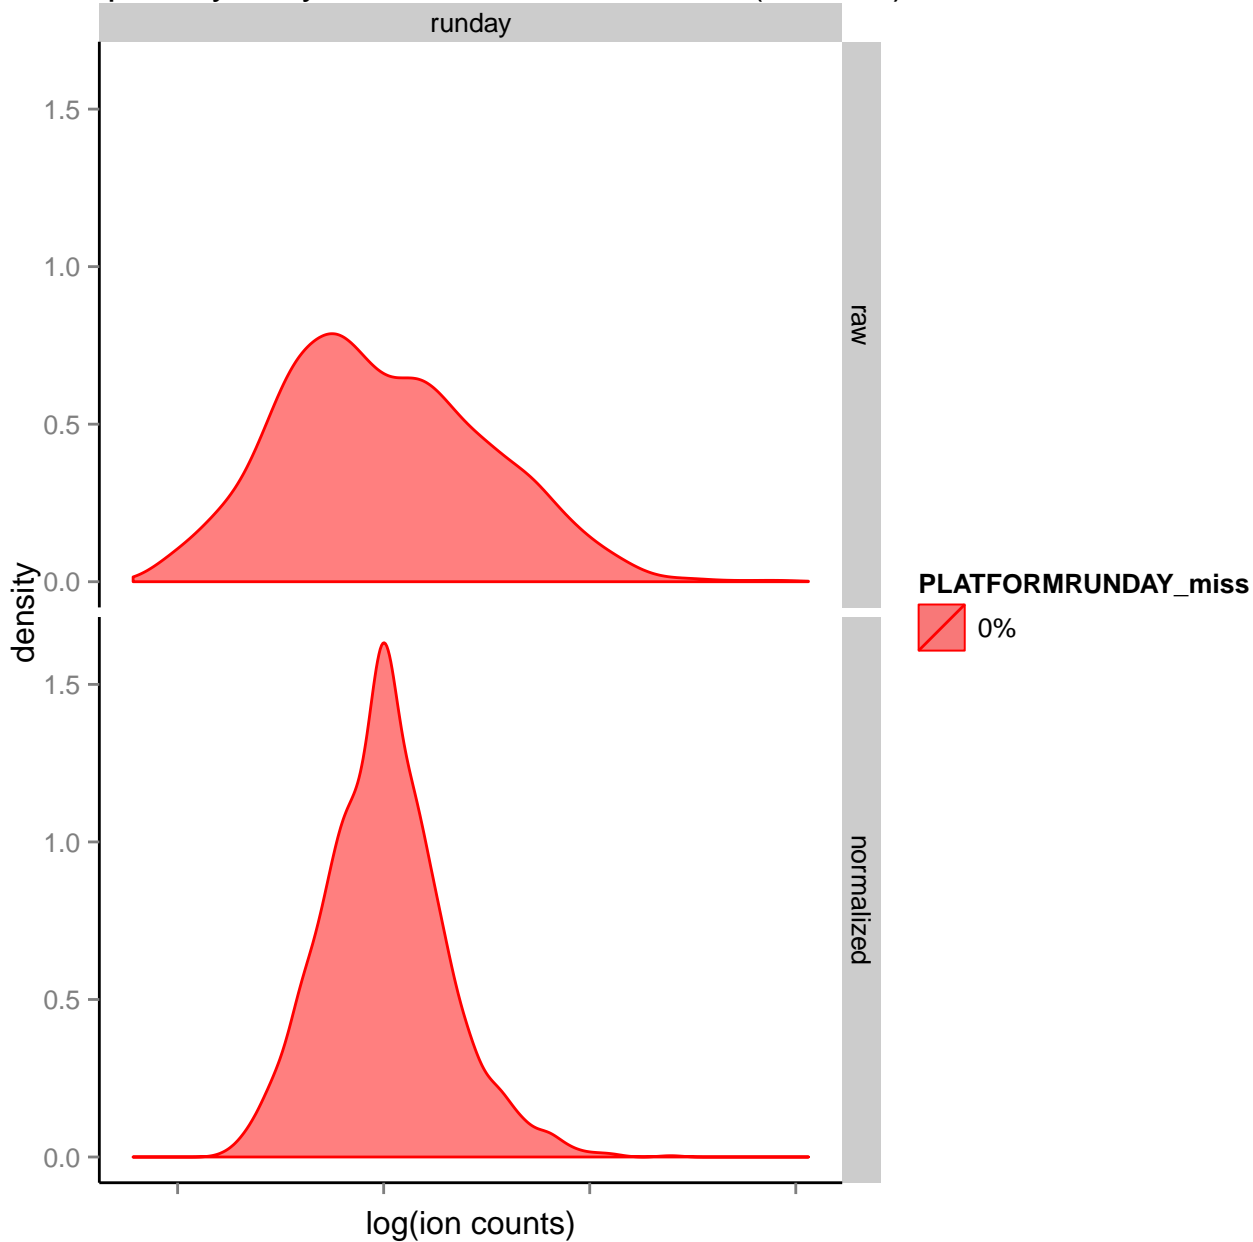

# 7-methylguanine

runday

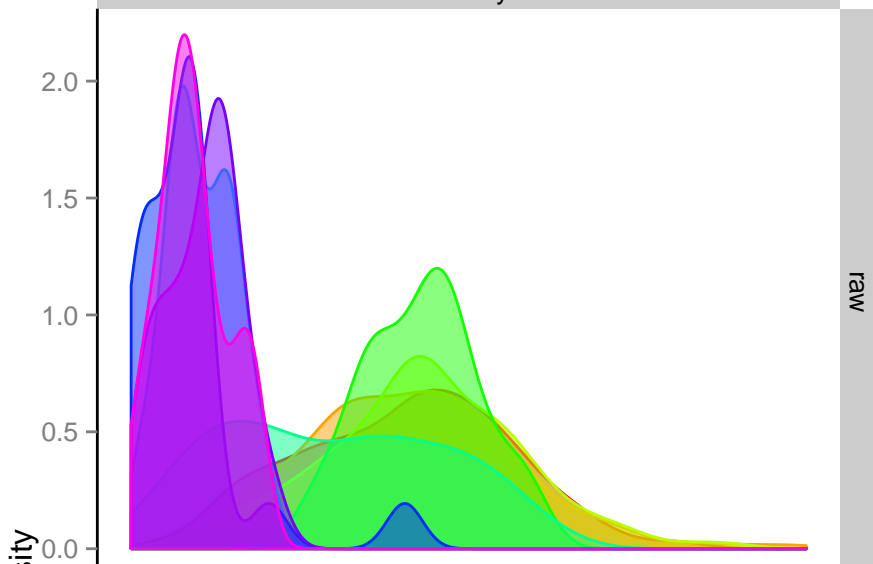

**PLATFORMRUNDAY\_miss**

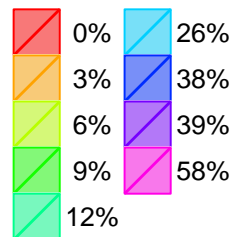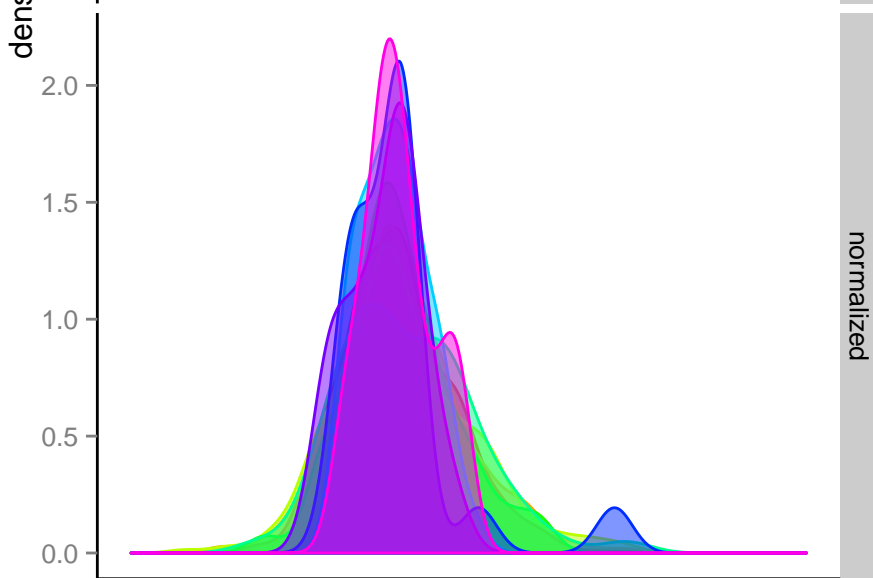

log(ion counts)

# 7-methylxanthine

runday

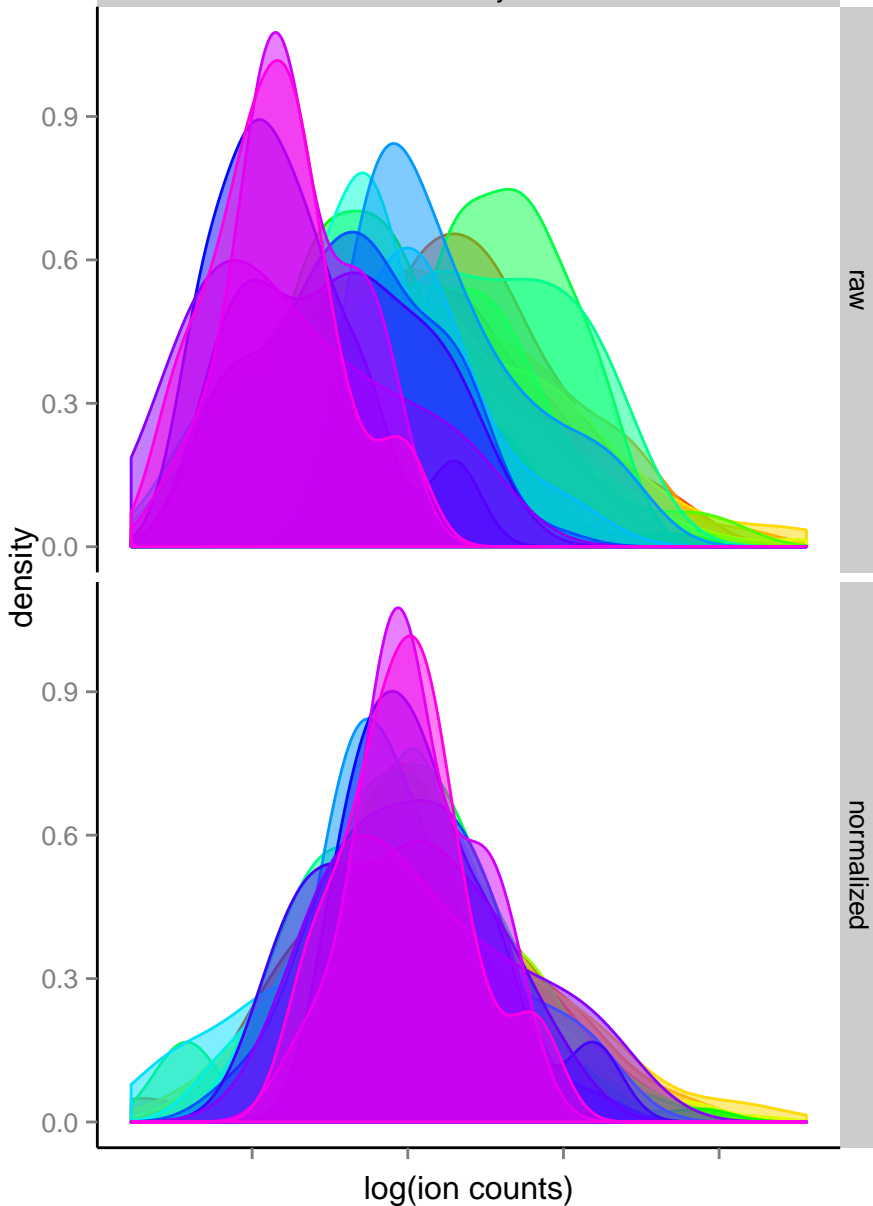

raw

normalized

## PLATFORMRUNDAY\_miss

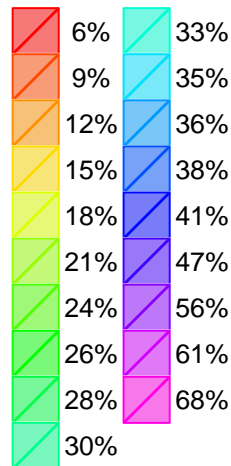

# acetylcarnitine

runday

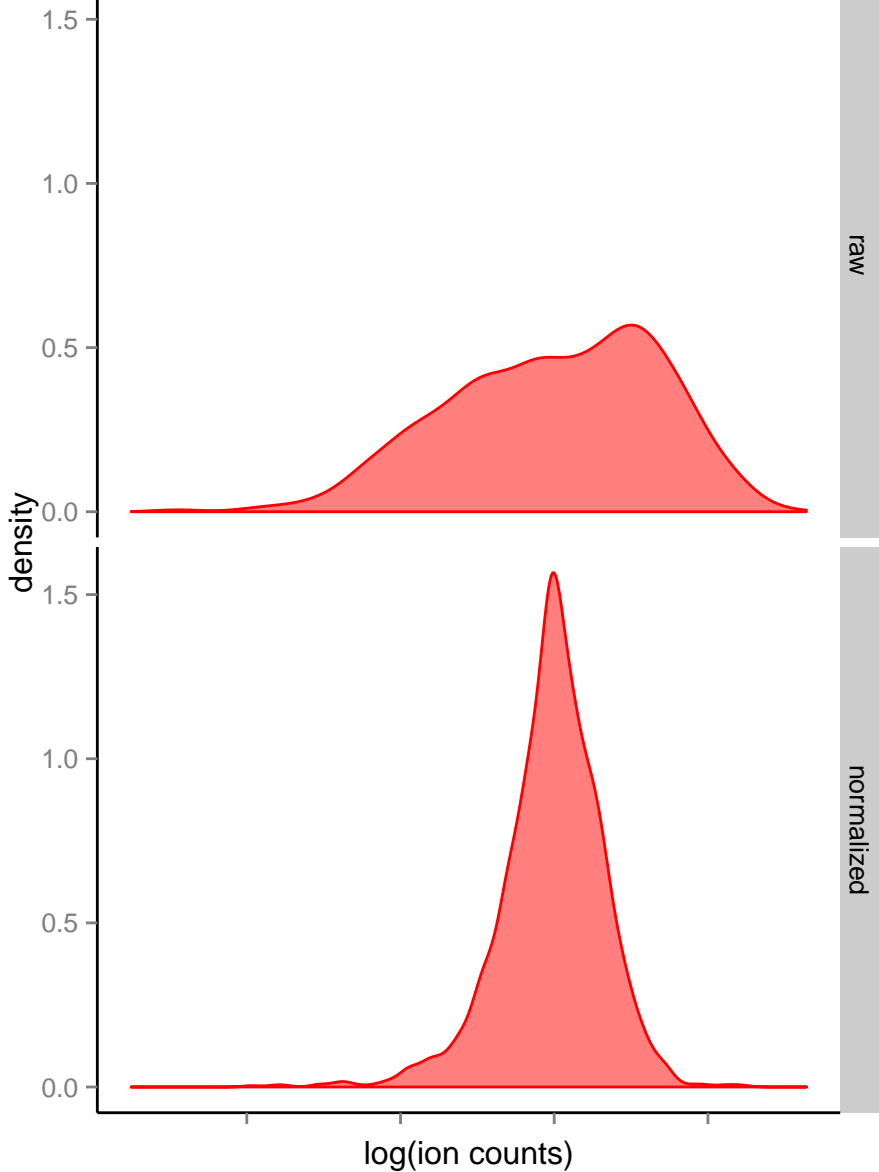

raw

normalized

**PLATFORMRUNDAY\_miss**

0%

# acetylphosphate

runday

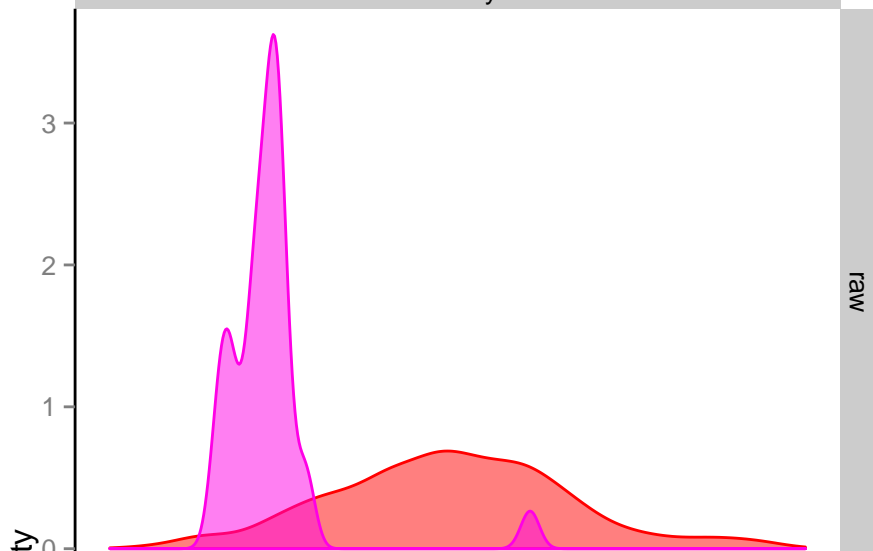

raw

PLATFORMRUNDAY\_miss



0%

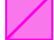

3%

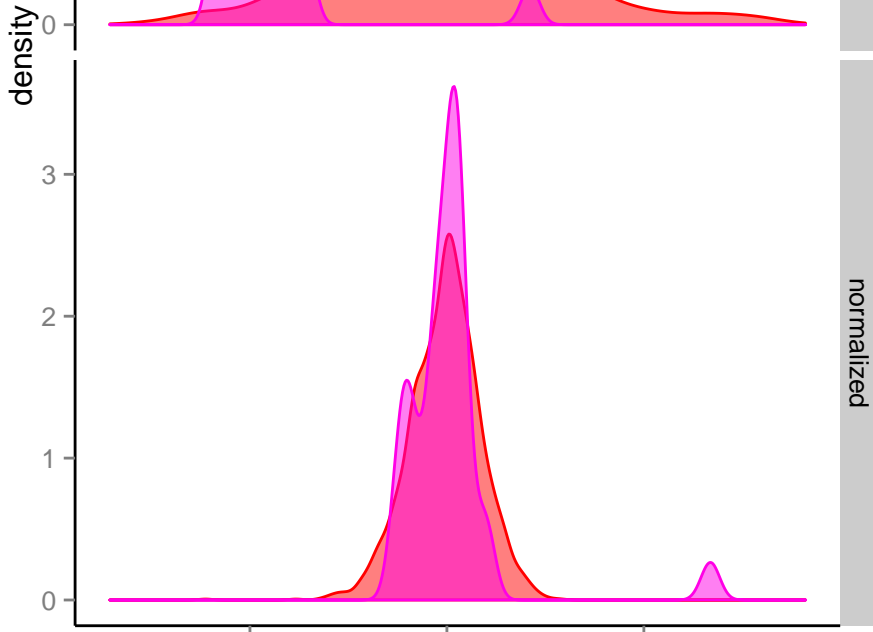

normalized

log(ion counts)



# adenosine

runday

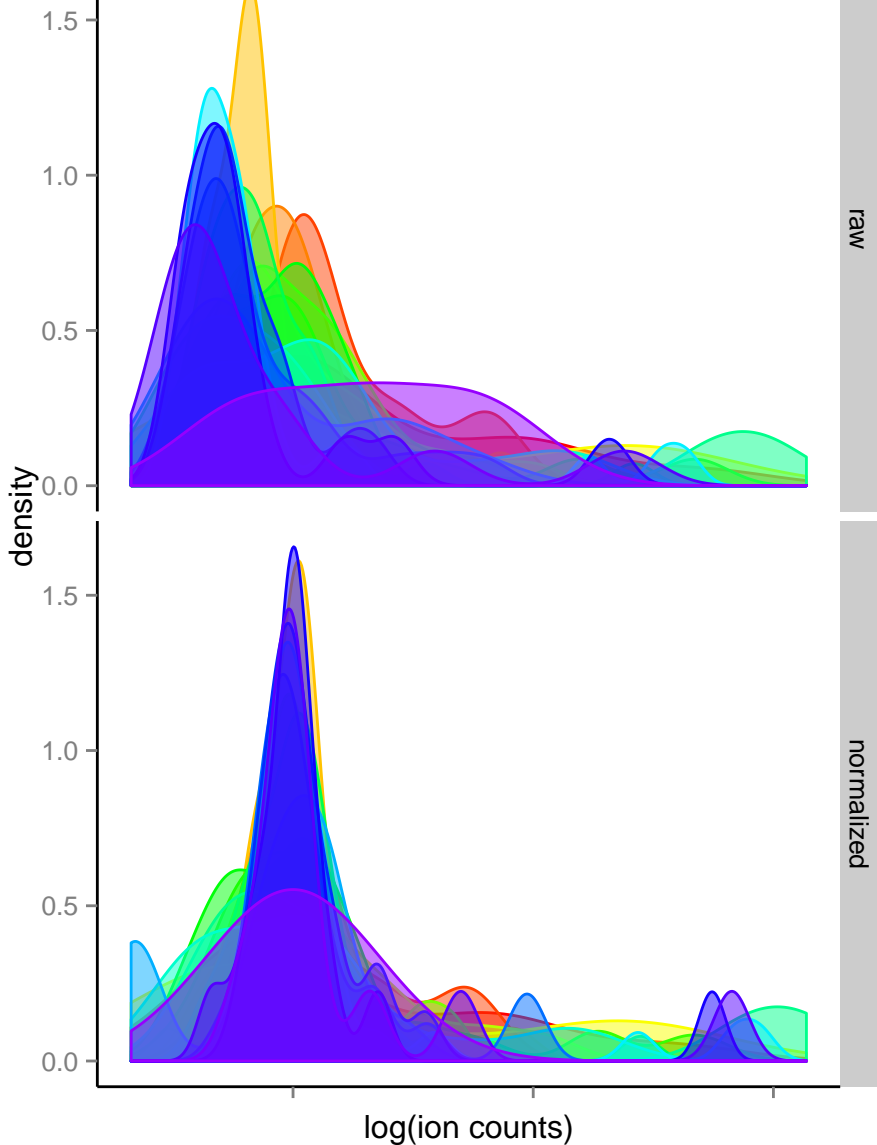

## PLATFORMRUNDAY\_miss

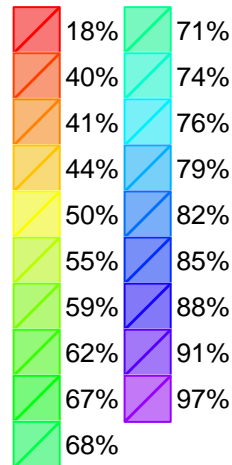

# ADpSGEGDFXAEGGGVR\*

runday

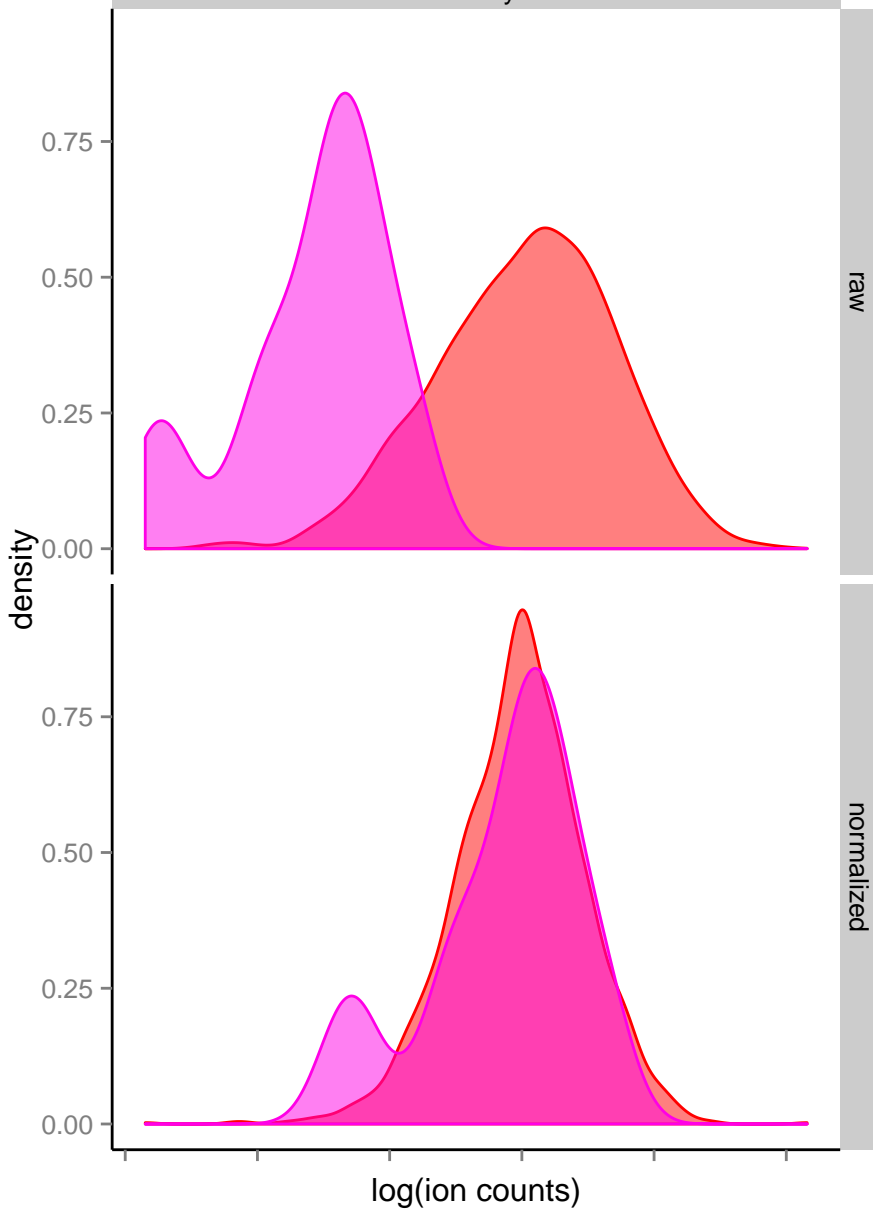

raw

normalized

**PLATFORMRUNDAY\_miss**

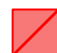

0%

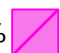

9%

density

log(ion counts)

# adrenate (22:4n6)

runday

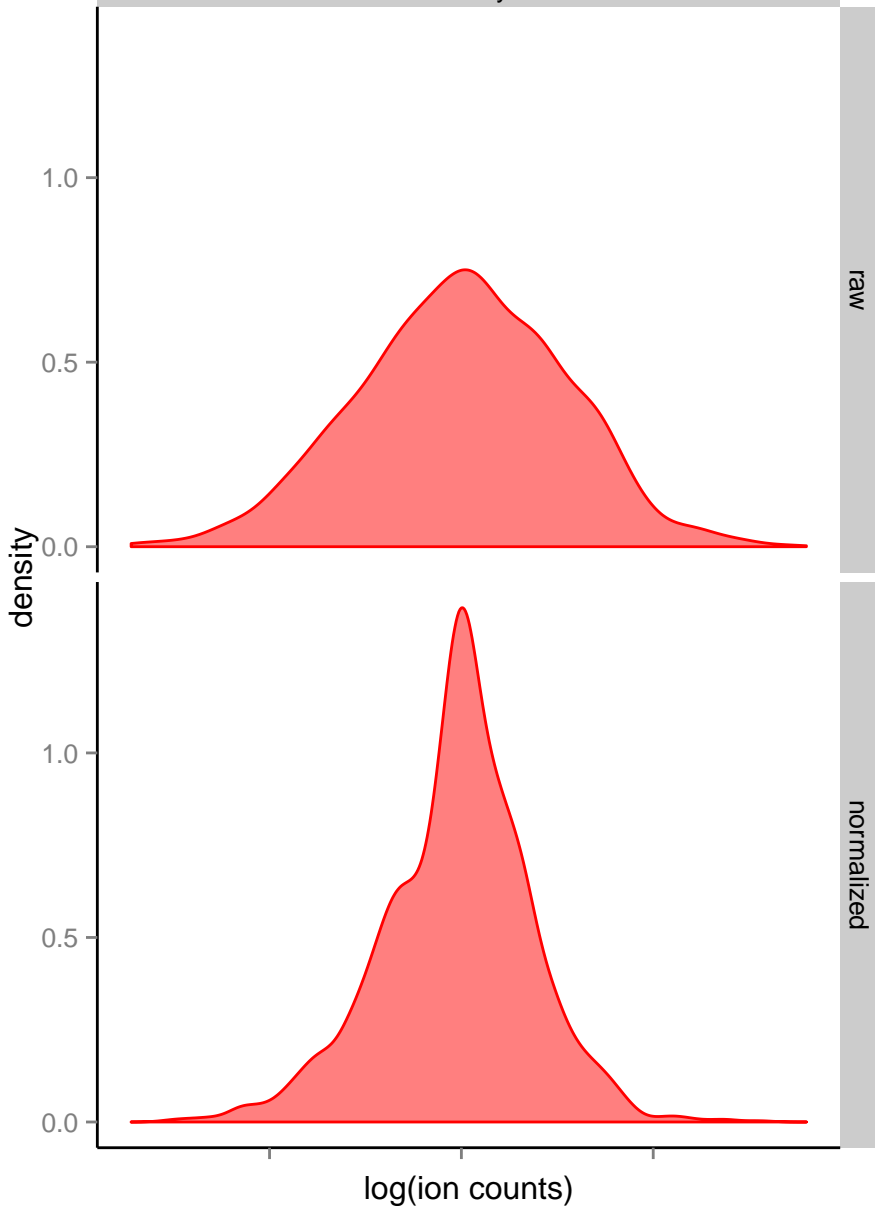

raw

normalized

**PLATFORMRUNDAY\_miss**

0%

# ADSGEGDFXAEGGGVR\*

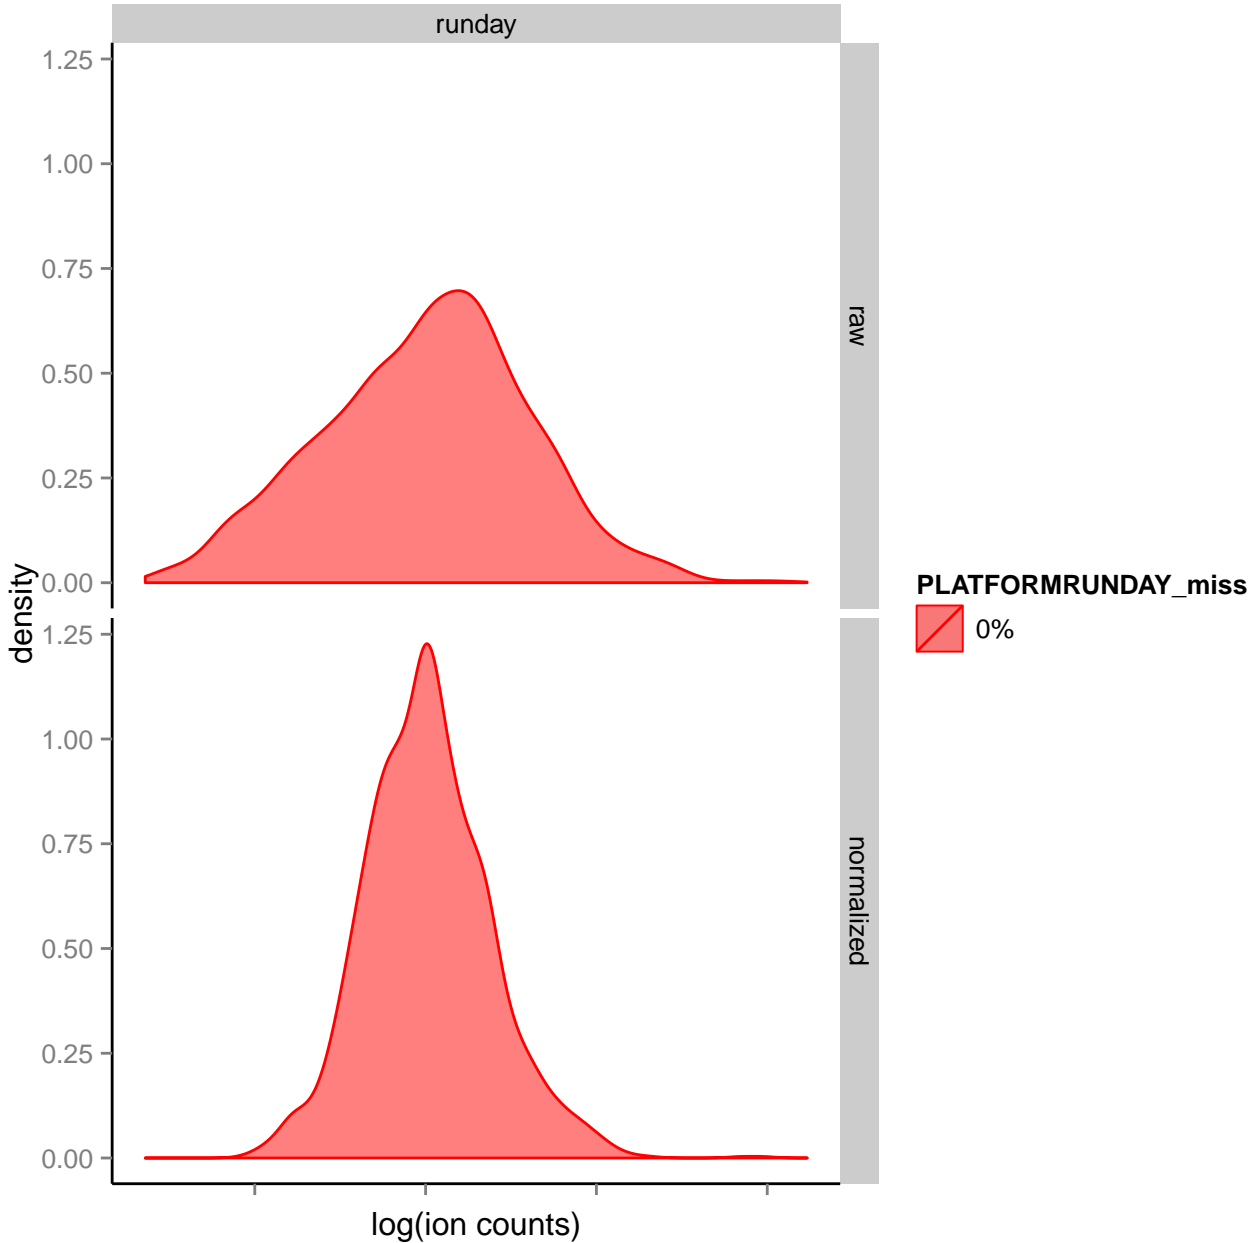

# alanine

runday

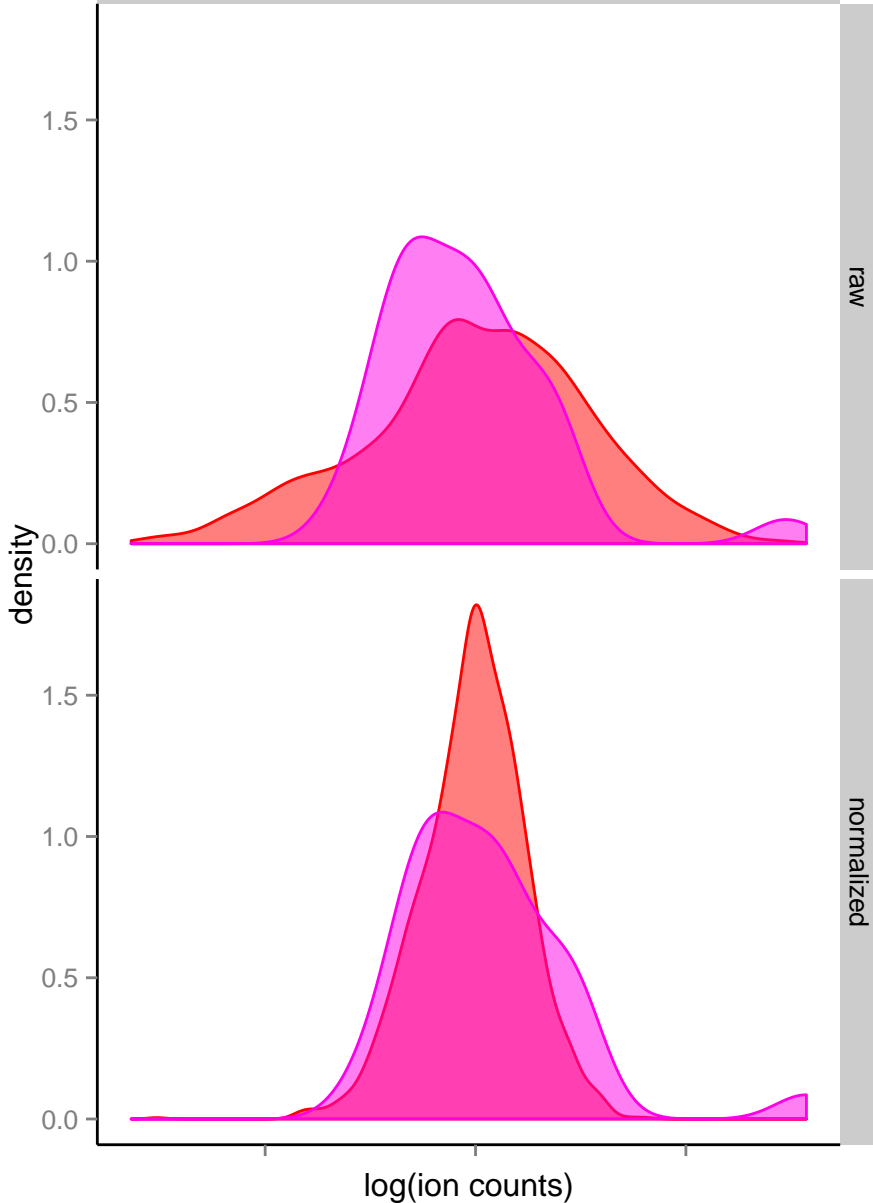

raw

normalized

**PLATFORMRUNDAY\_miss**

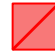

0%

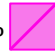

3%

`log(ion counts)`

# allantoin

runday

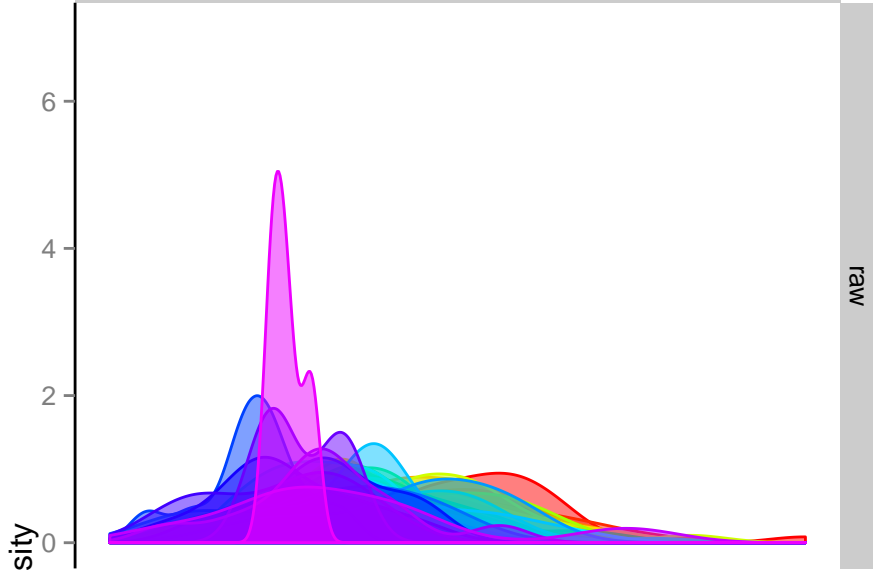

raw

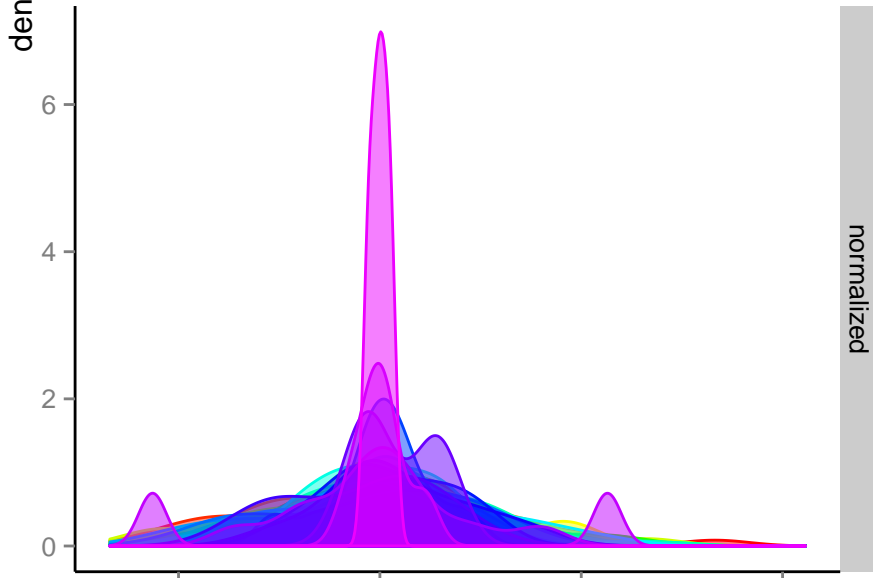

normalized

log(ion counts)

## PLATFORMRUNDAY\_miss

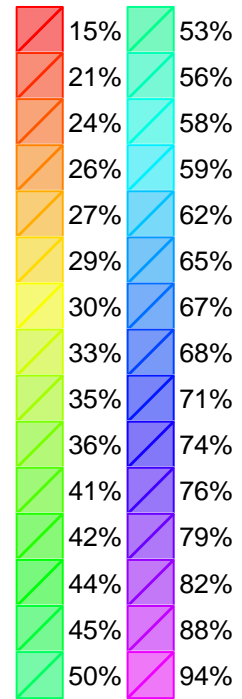

# alpha-hydroxyisovalerate

runday

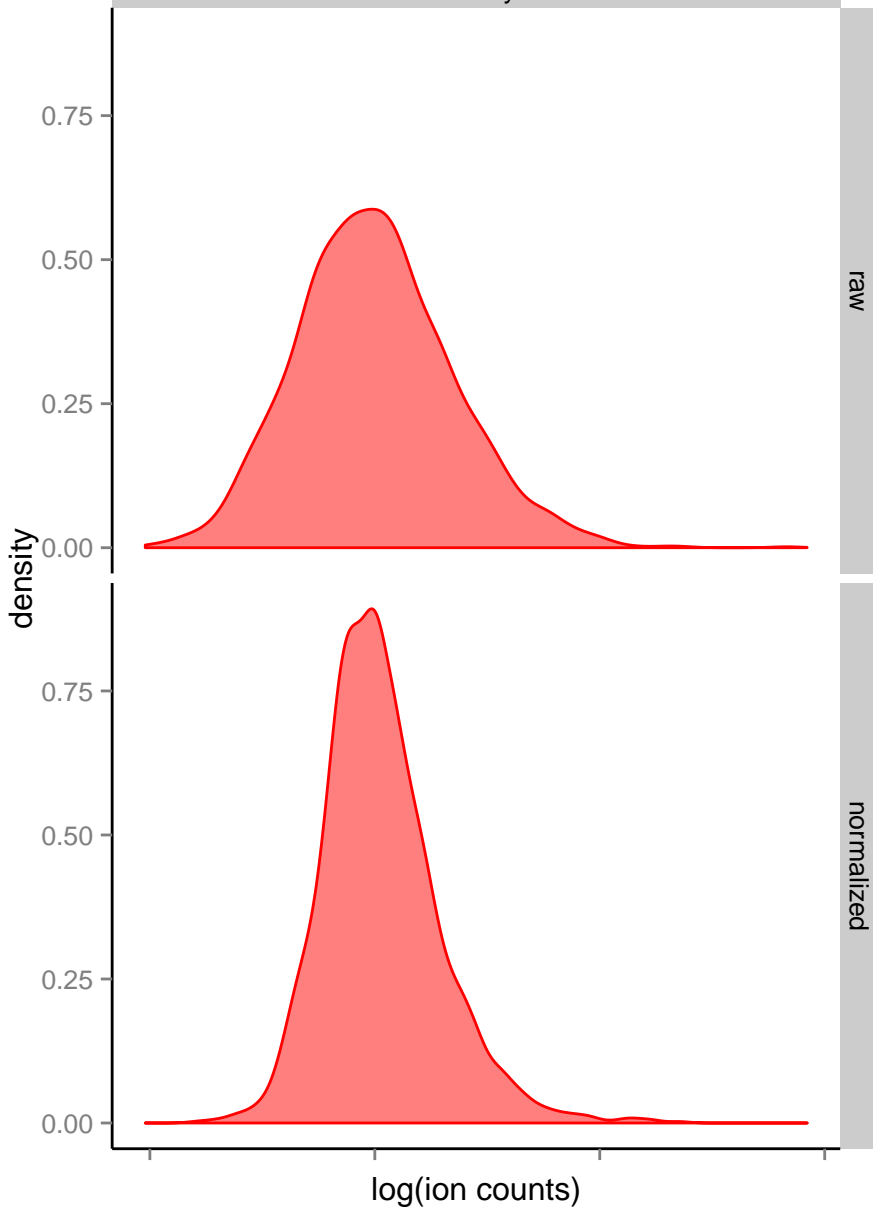

**PLATFORMRUNDAY\_miss**

0%

# alpha-ketoglutarate

runday

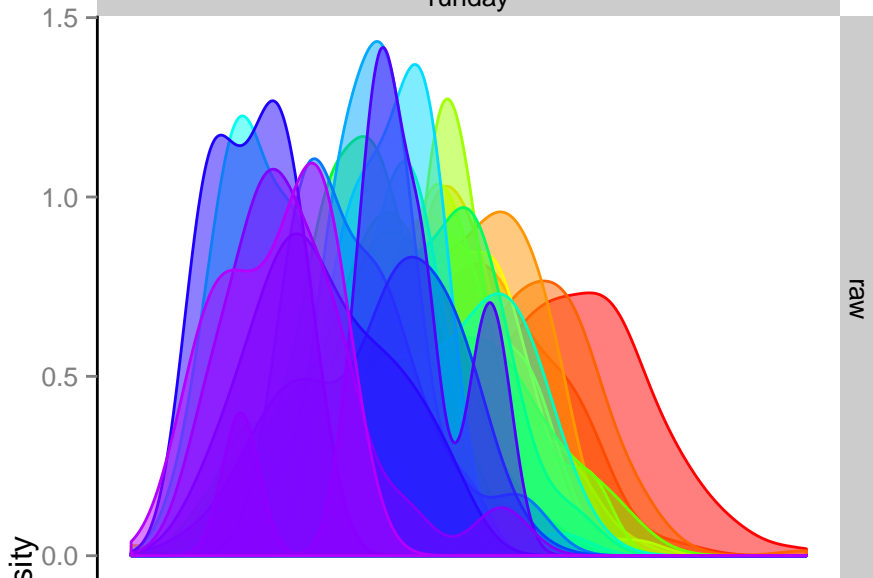

raw

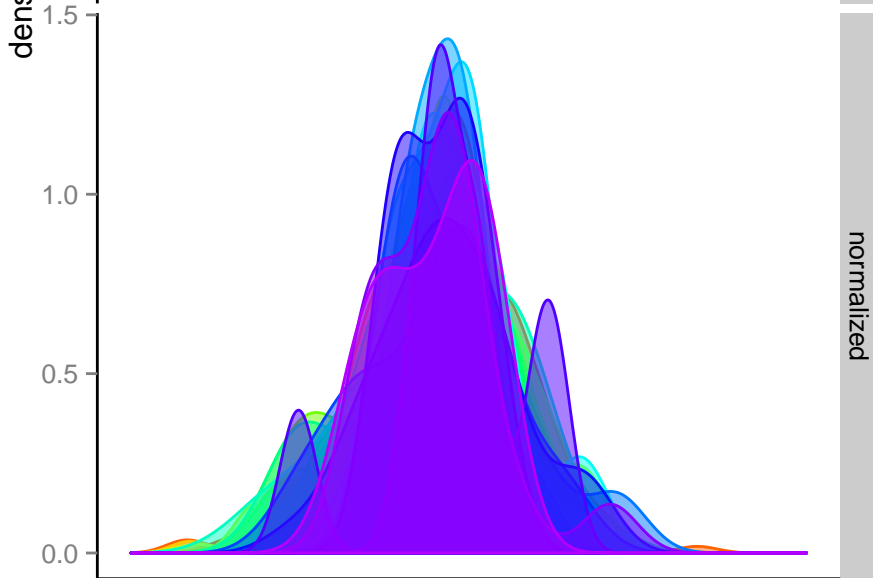

normalized

## PLATFORMRUNDAY\_miss

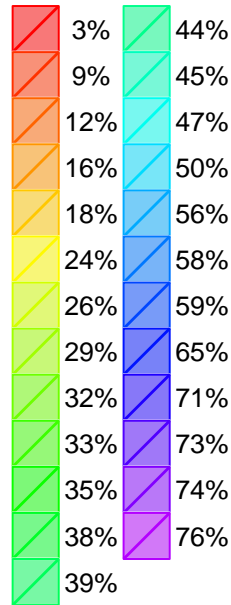

log(ion counts)



# alpha-tocopherol

runday

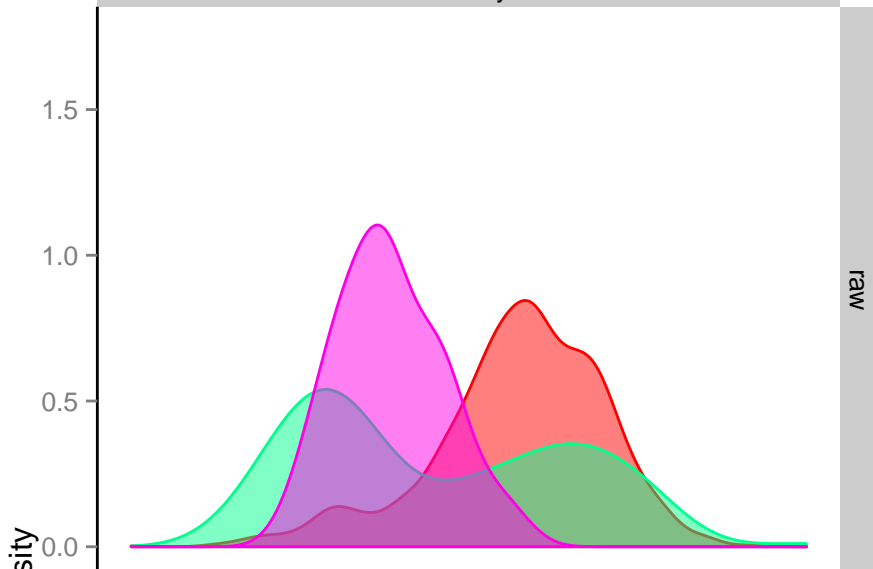

raw

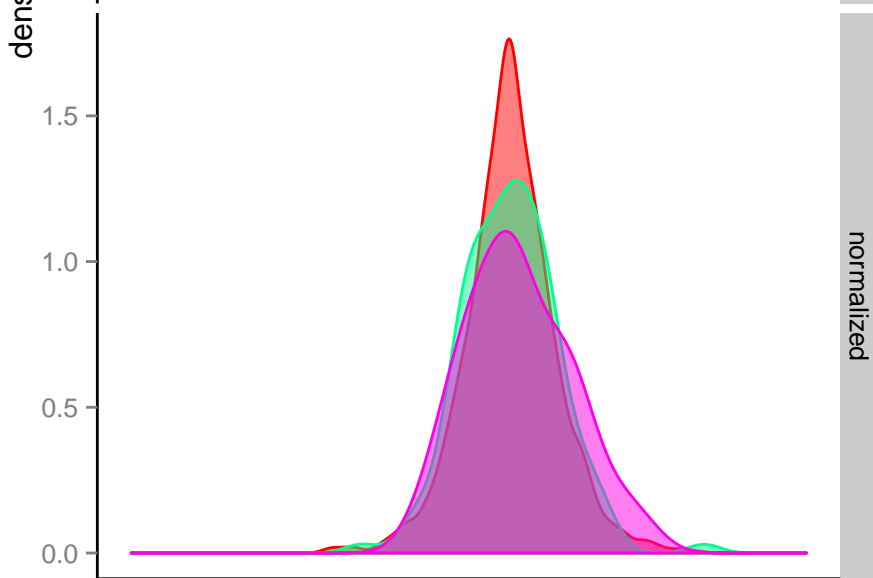

normalized

**PLATFORMRUNDAY\_miss**

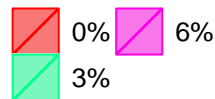

log(ion counts)

# androsterone sulfate

runday

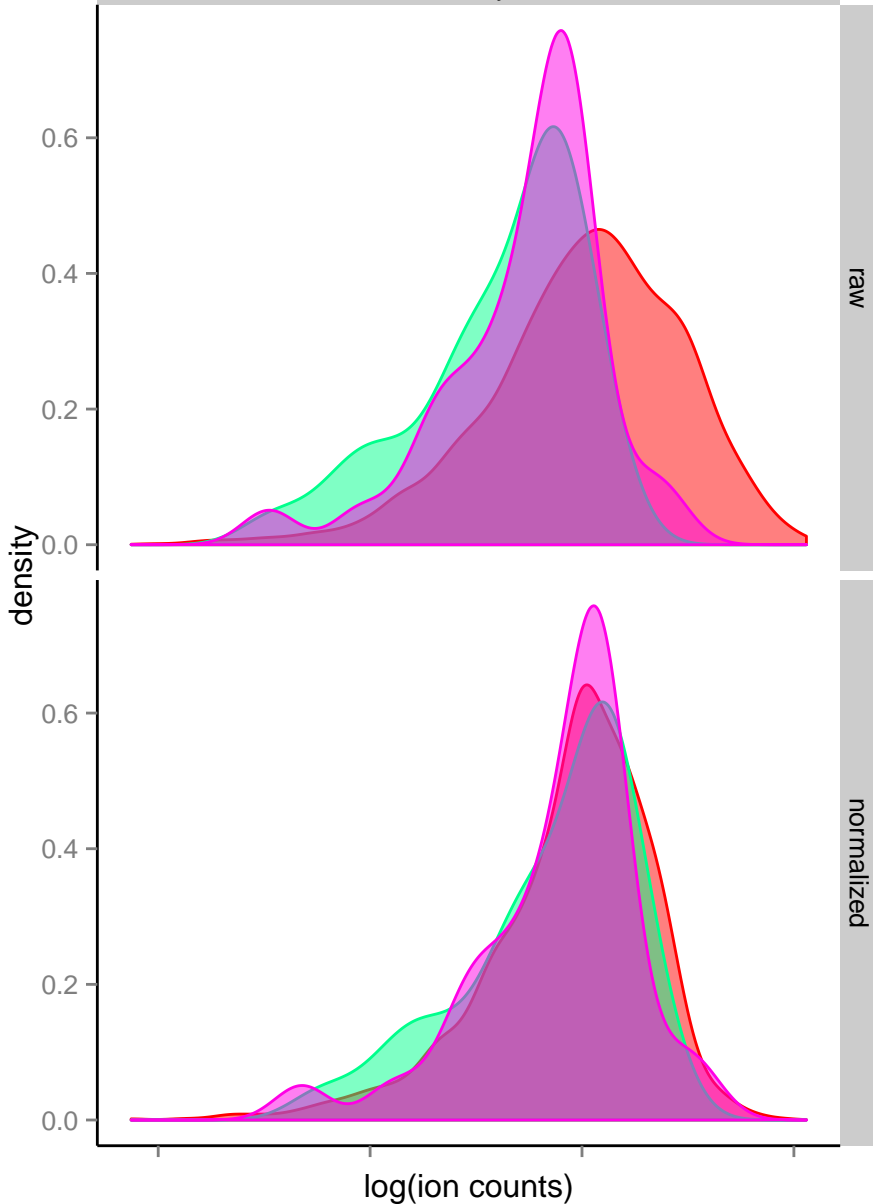

raw

normalized

**PLATFORMRUNDAY\_miss**

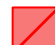

0%

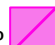

6%

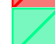

3%

# arabinose

runday

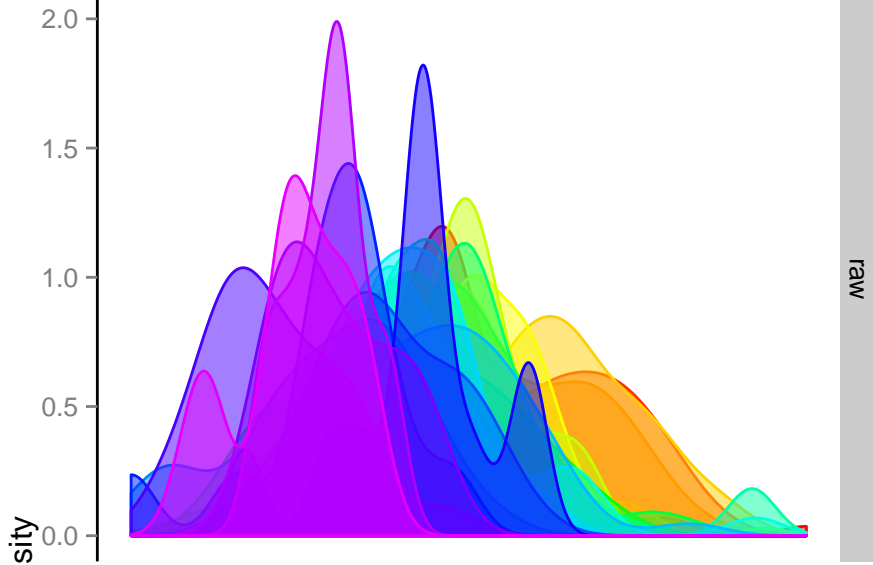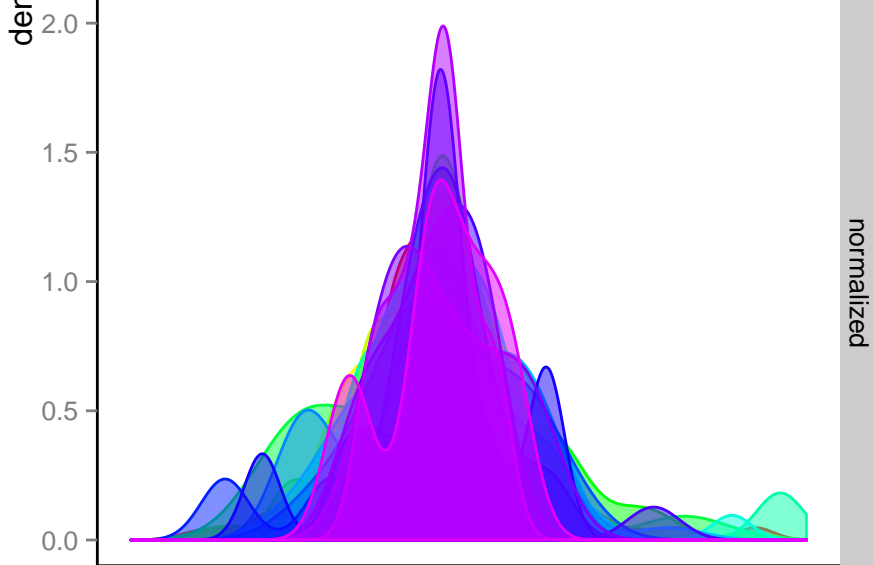

log(ion counts)

## PLATFORMRUNDAY\_miss

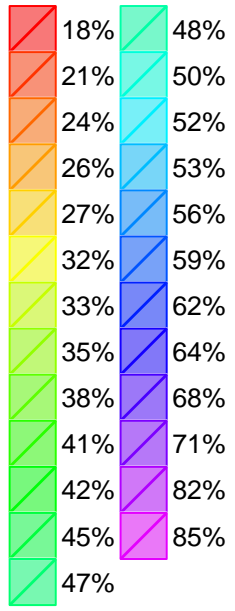

# arabitol

runday

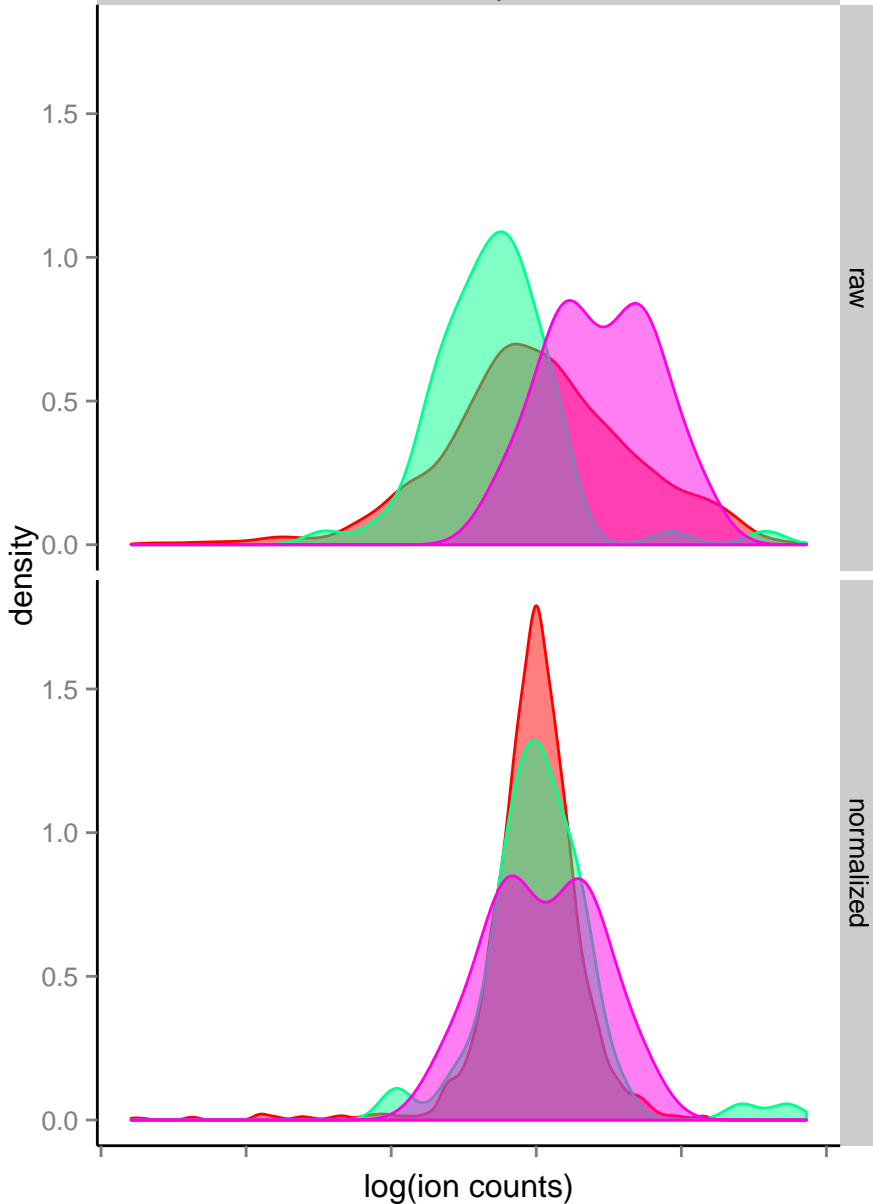

raw

normalized

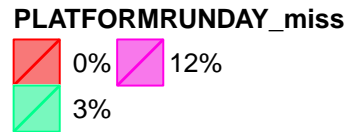

log(ion counts)

# arachidonate (20:4n6)

runday

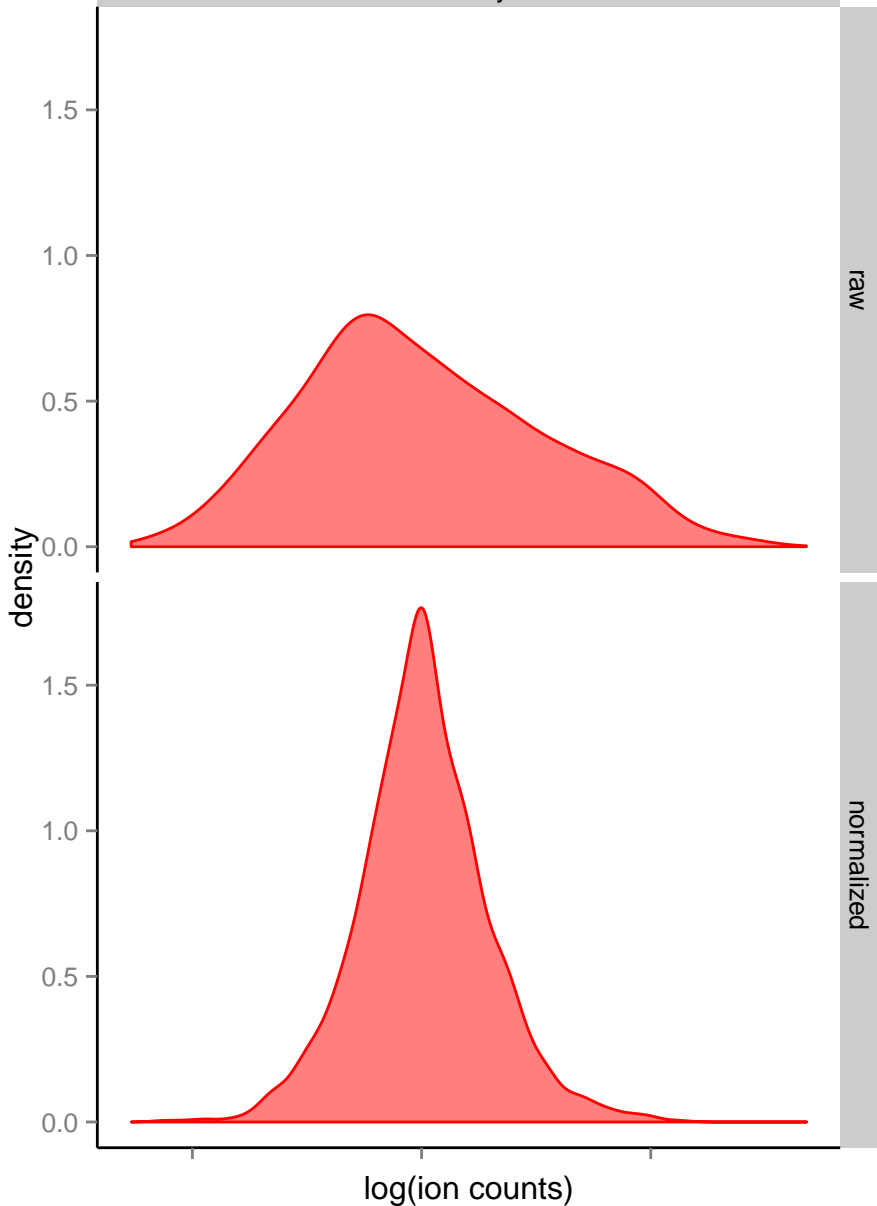

**PLATFORMRUNDAY\_miss**

0%

# arginine

runday

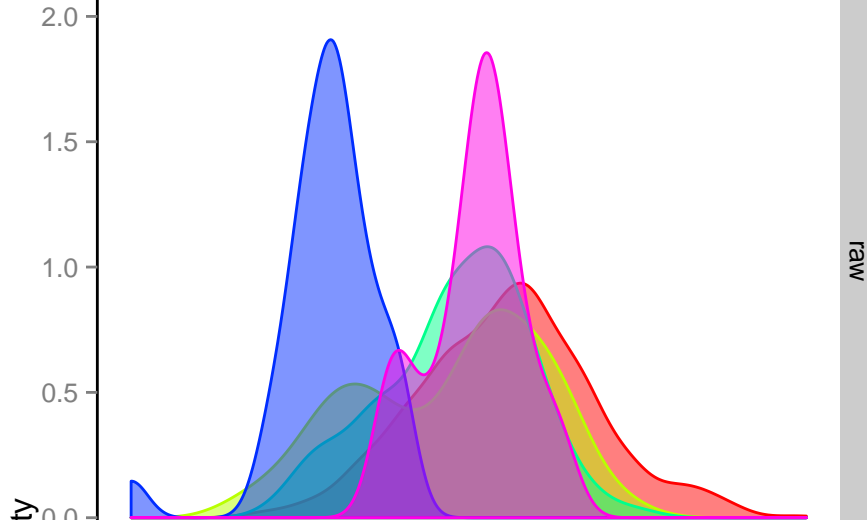

raw

## PLATFORMRUNDAY\_miss

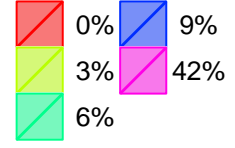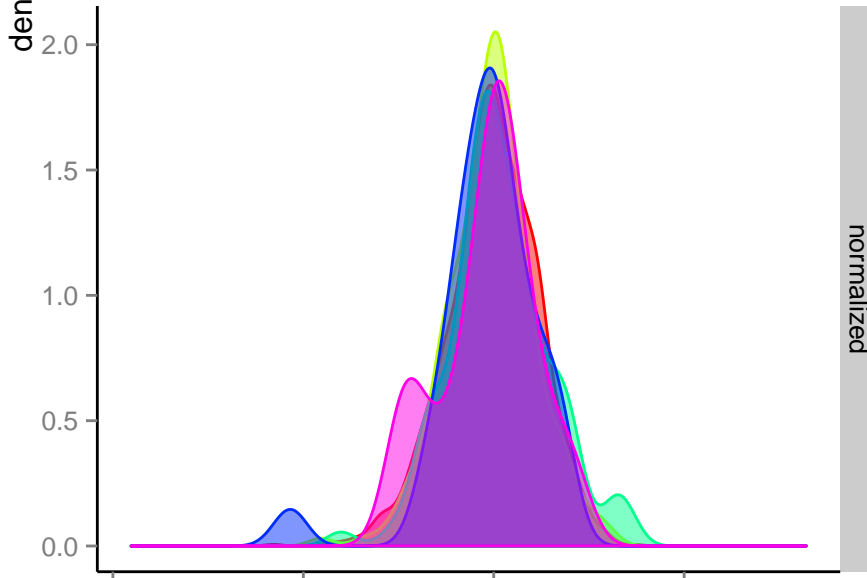

normalized

log(ion counts)

# ascorbate (Vitamin C)

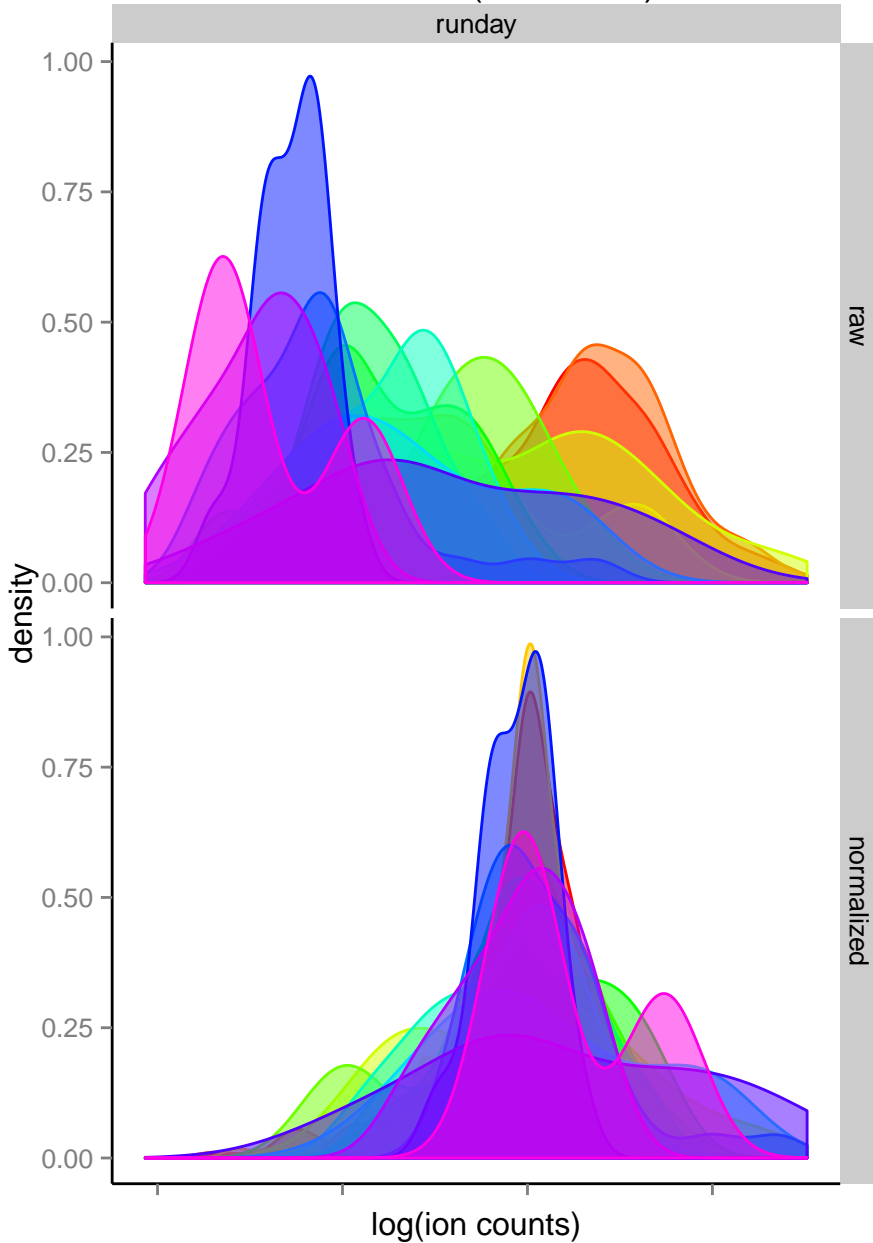

raw

normalized

## PLATFORMRUNDAY\_miss

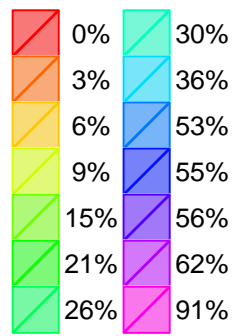

# asparagine

runday

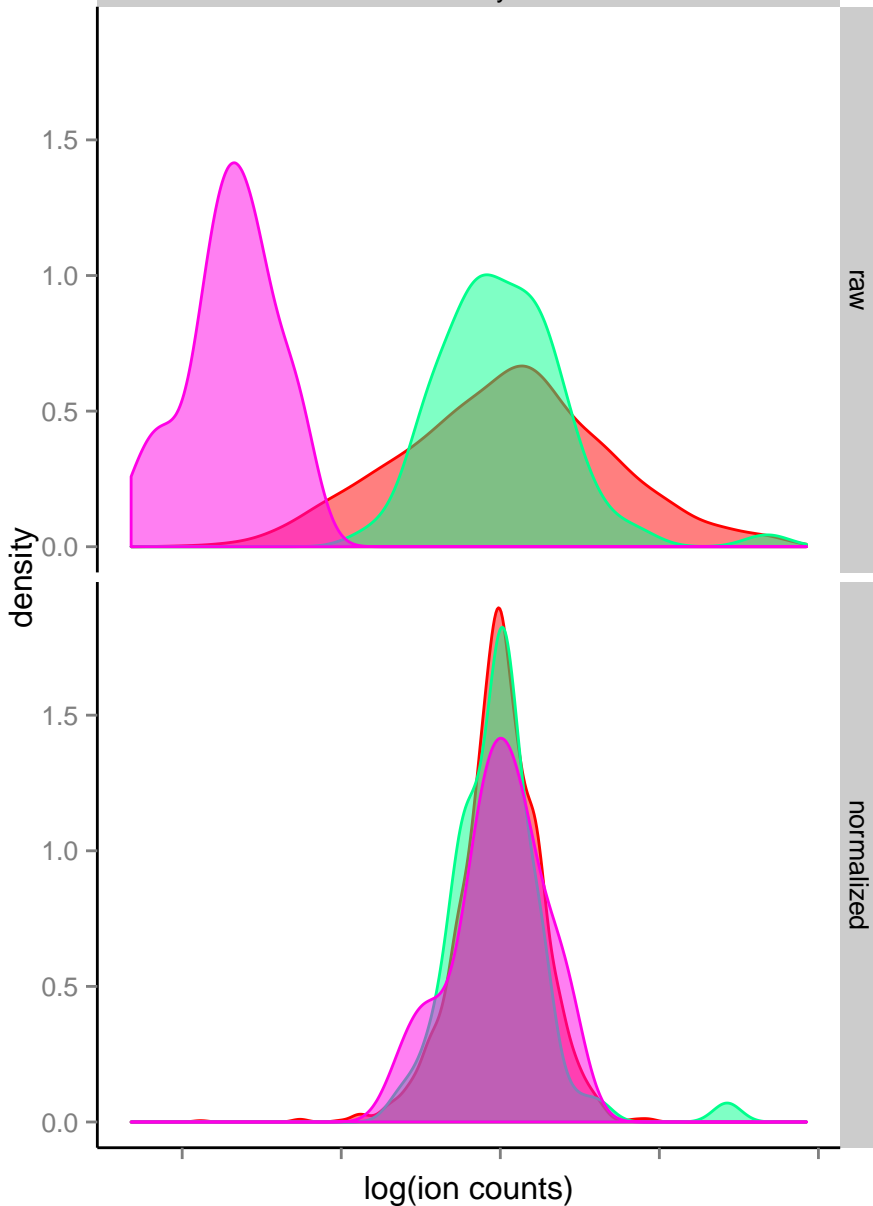

**PLATFORMRUNDAY\_miss**

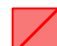

0%

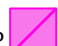

15%

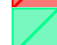

3%



# aspartate

runday

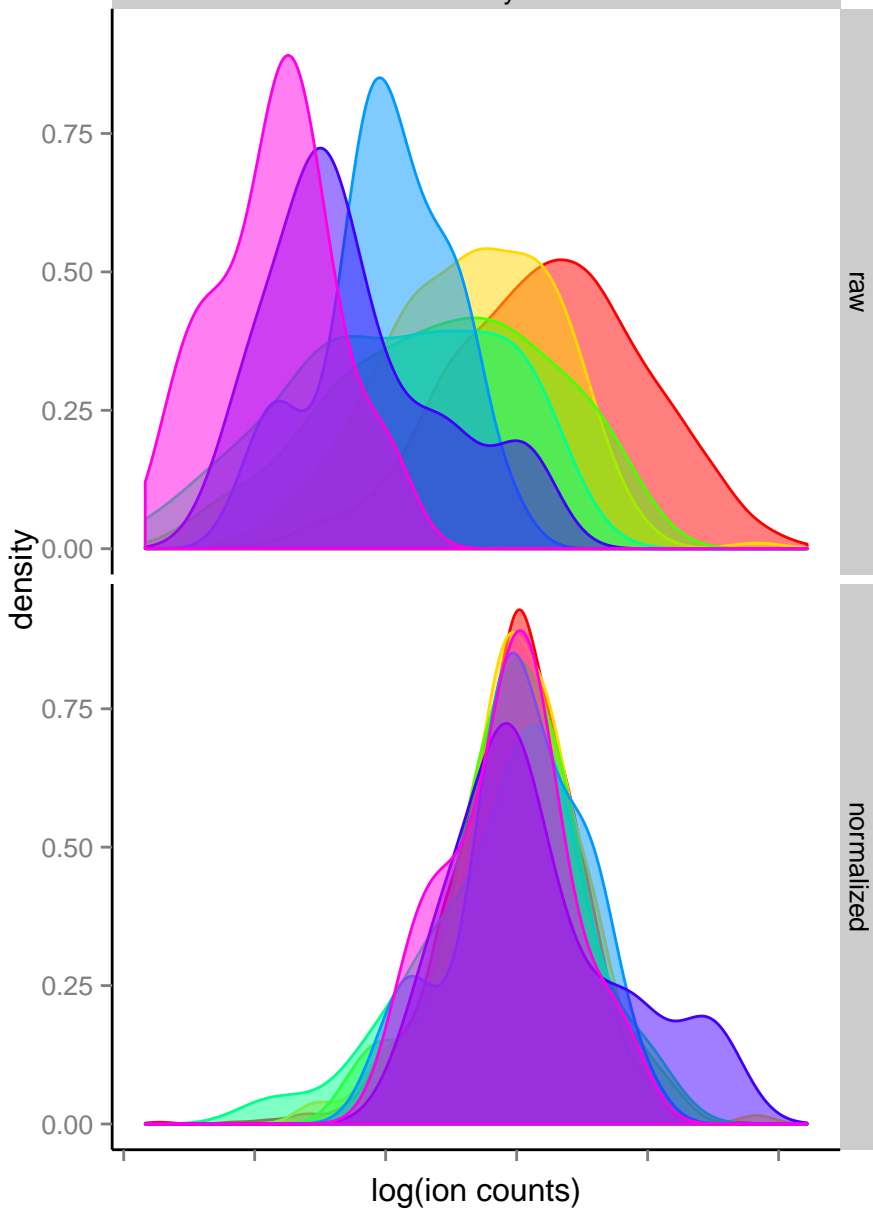

raw

normalized

## PLATFORMRUNDAY\_miss

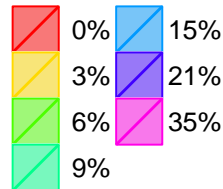

# aspartylphenylalanine

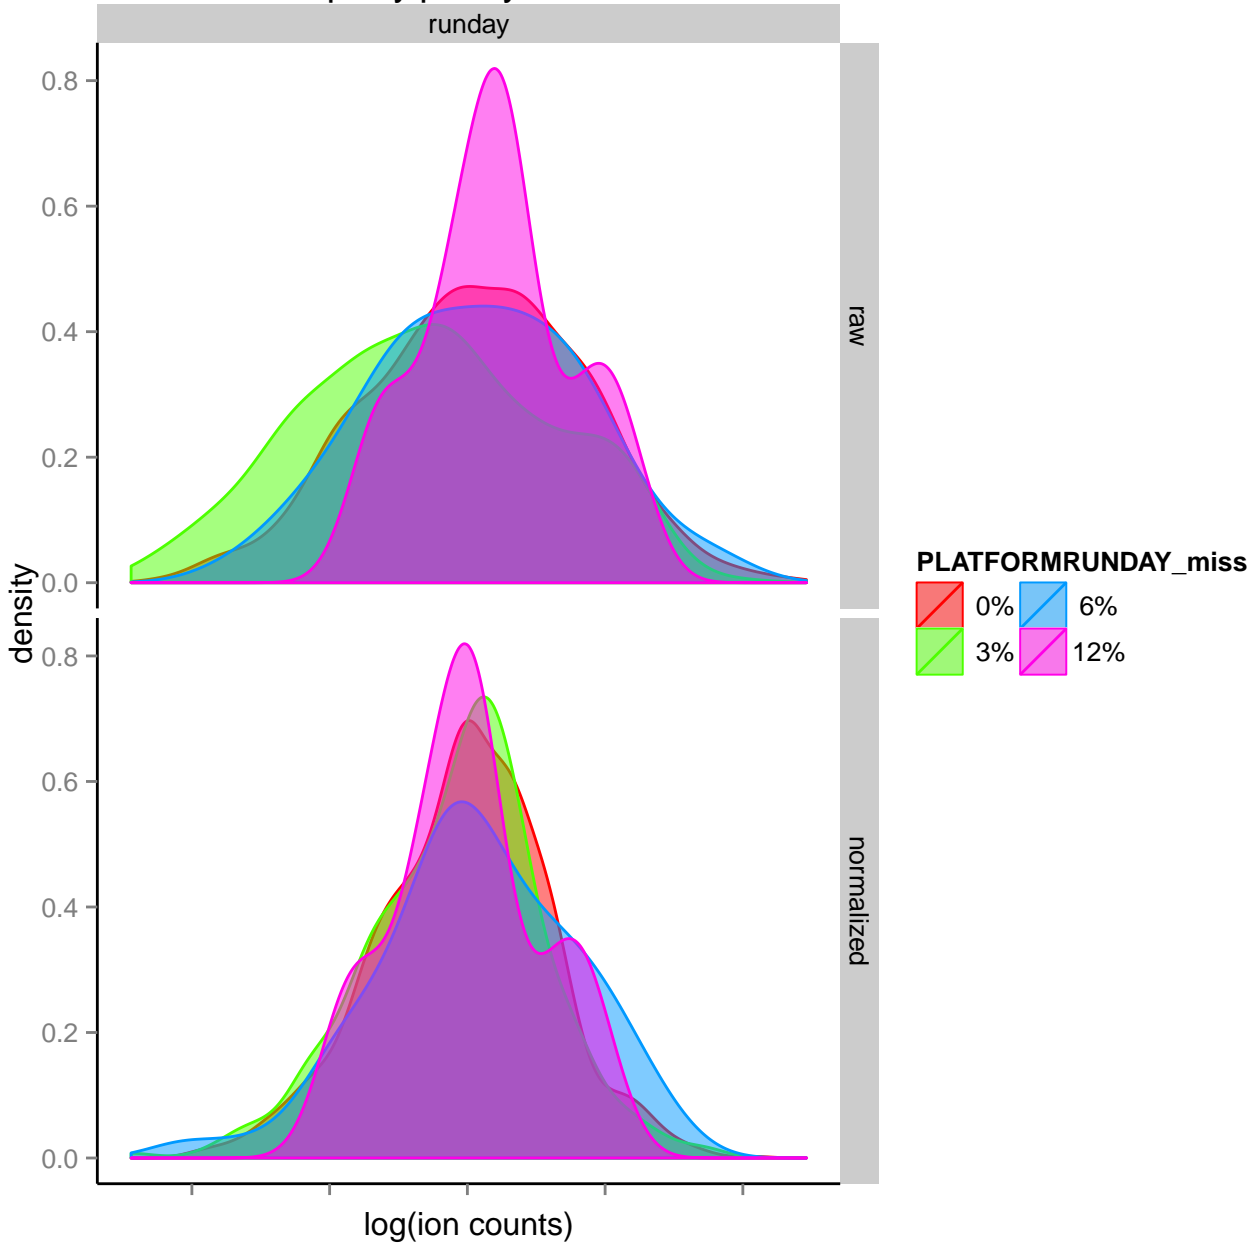

# benzoate

runday

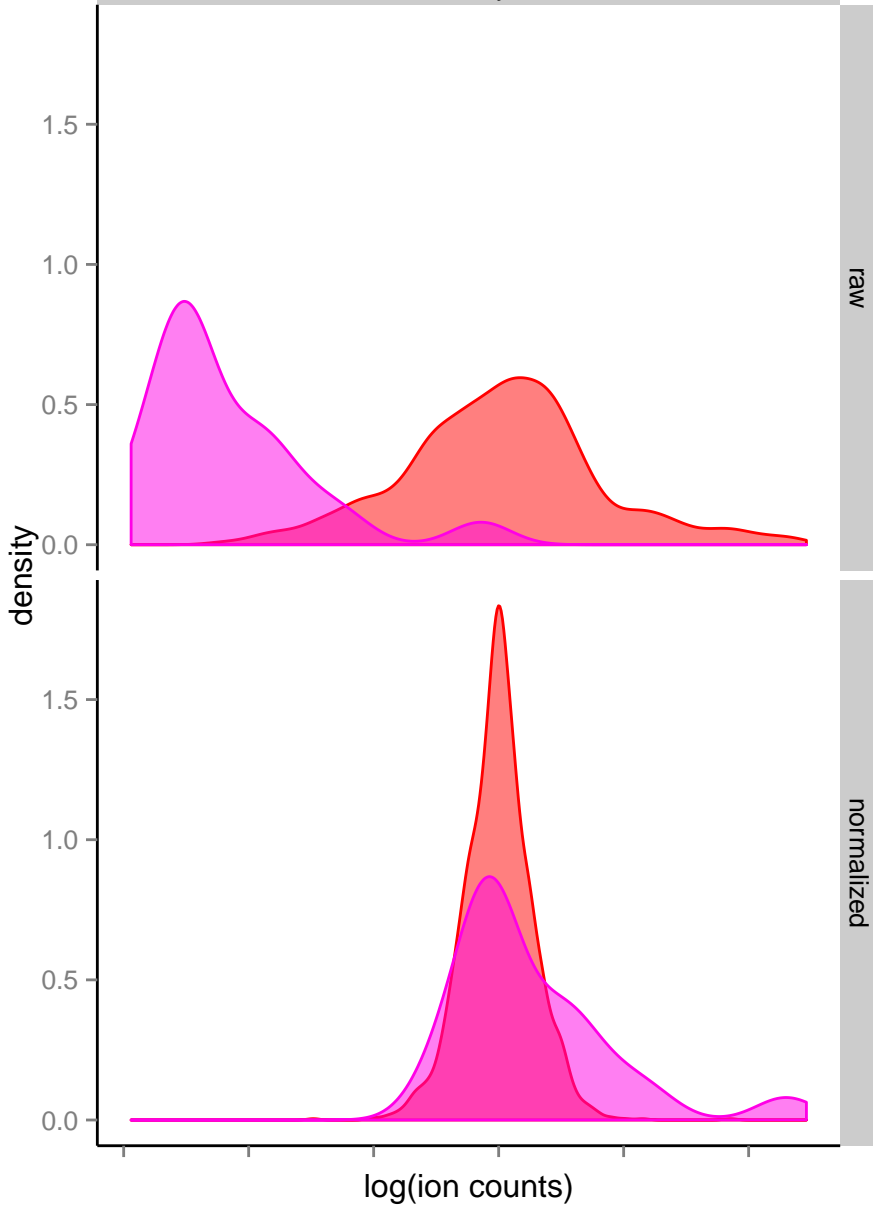

raw

normalized

**PLATFORMRUNDAY\_miss**



0%

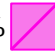

38%

log(ion counts)

# beta-hydroxyisovalerate

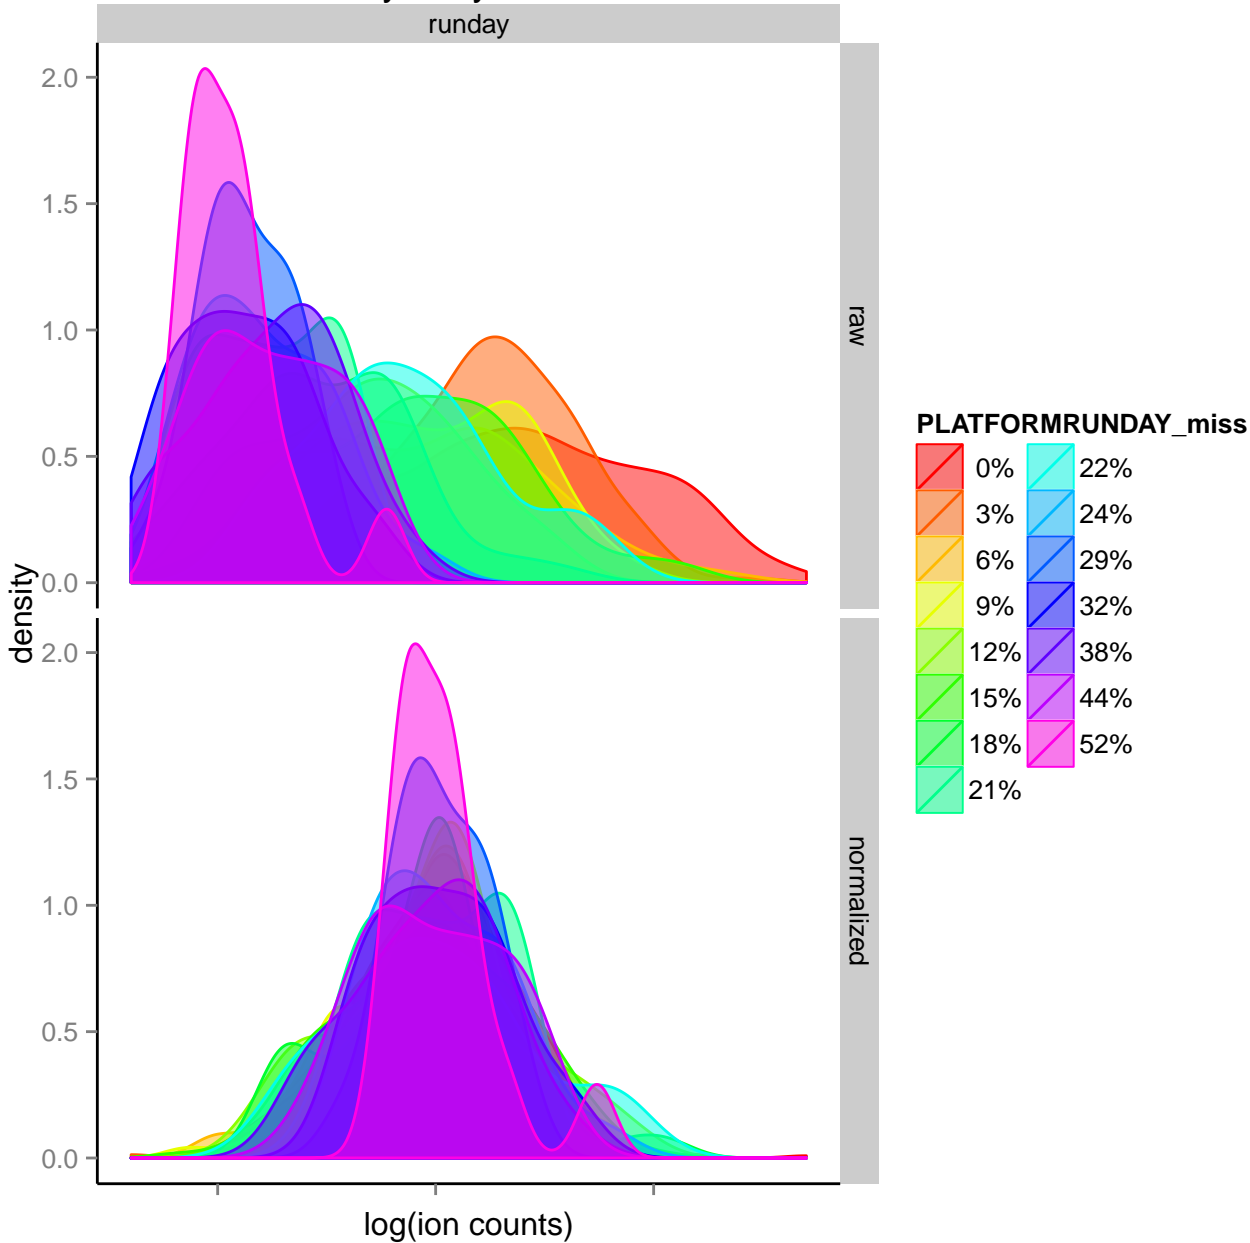

# betaine

runday

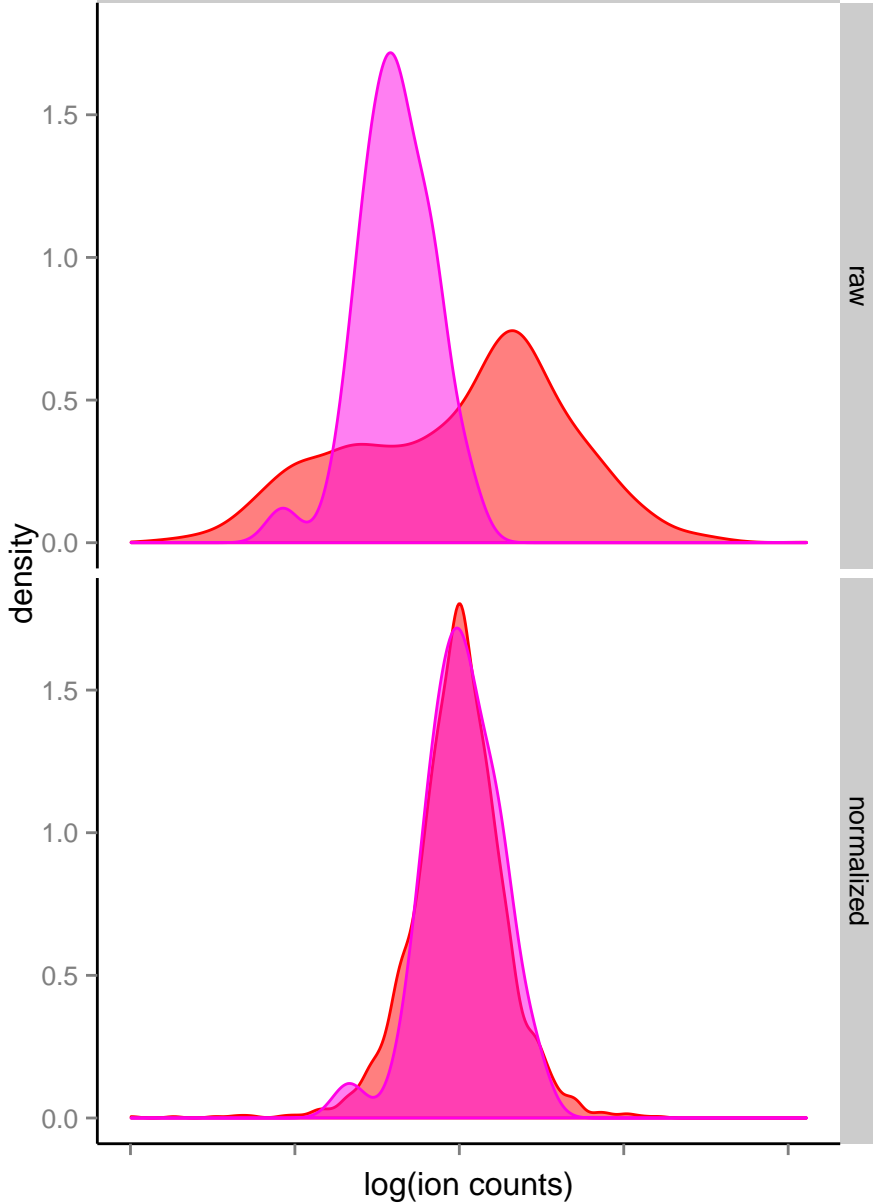

raw

normalized

**PLATFORMRUNDAY\_miss**

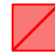

0%

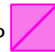

3%

log(ion counts)

# bilirubin (E;E)\*

runday

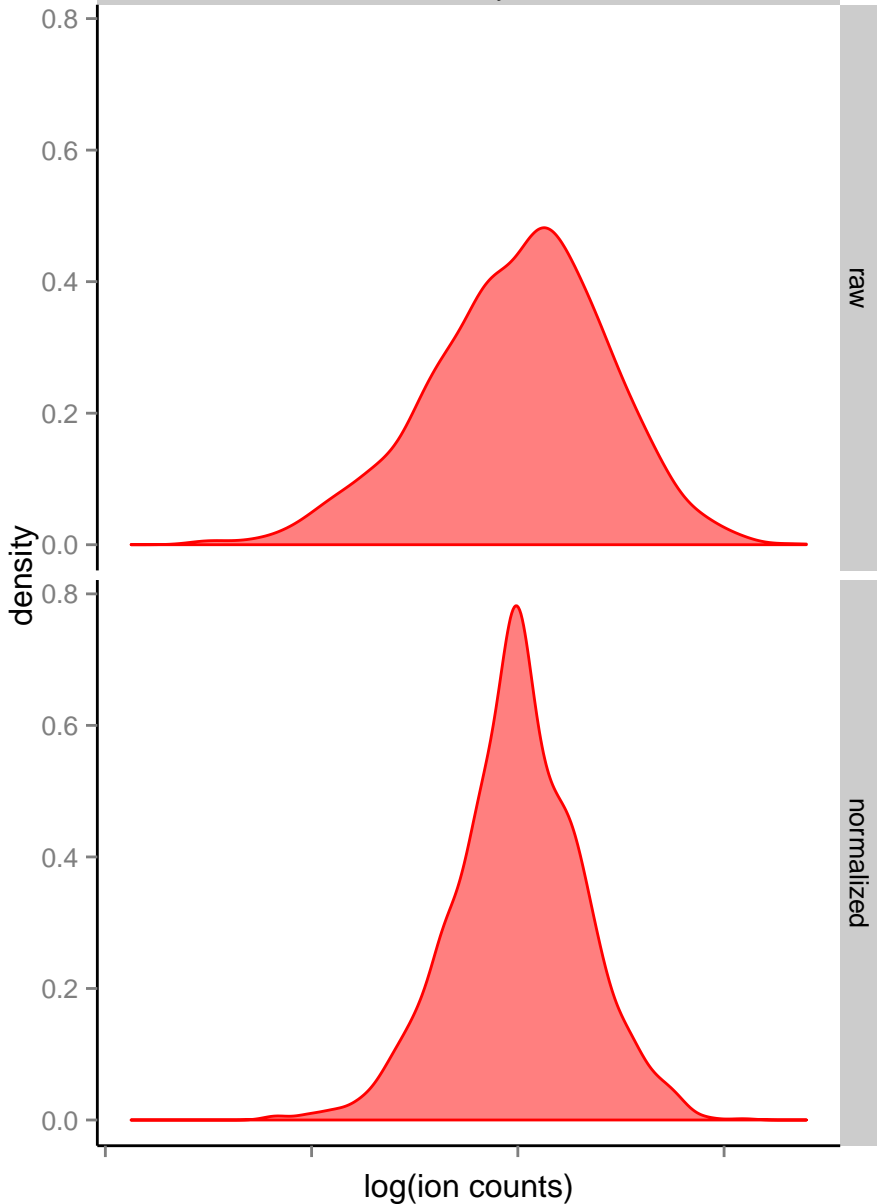

PLATFORMRUNDAY\_miss

0%

# bilirubin (E;Z or Z;E)\*

runday

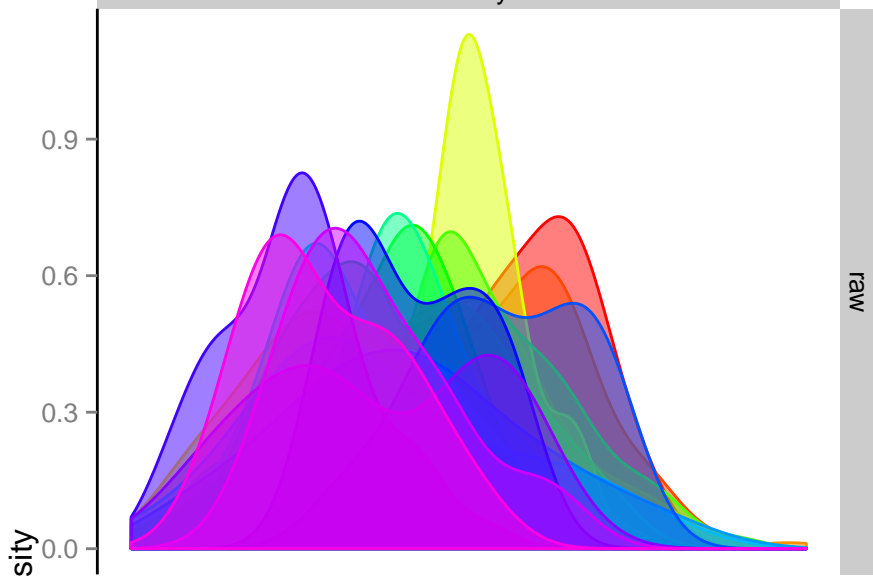

raw

## PLATFORMRUNDAY\_miss

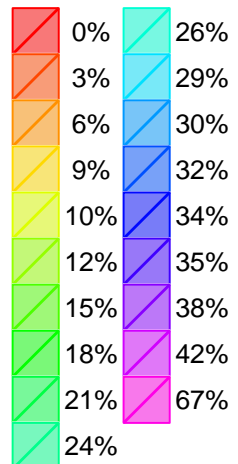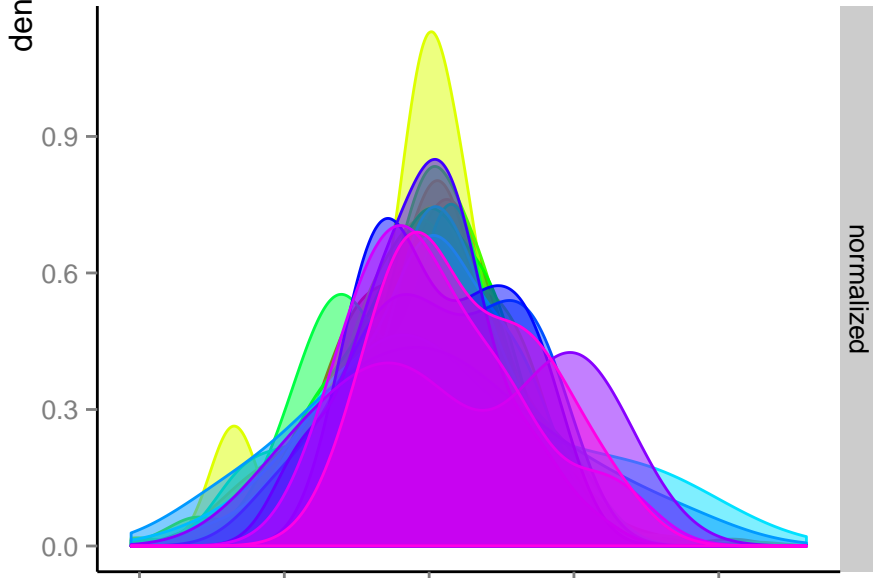

normalized

log(ion counts)

# bilirubin (Z;Z)

runday

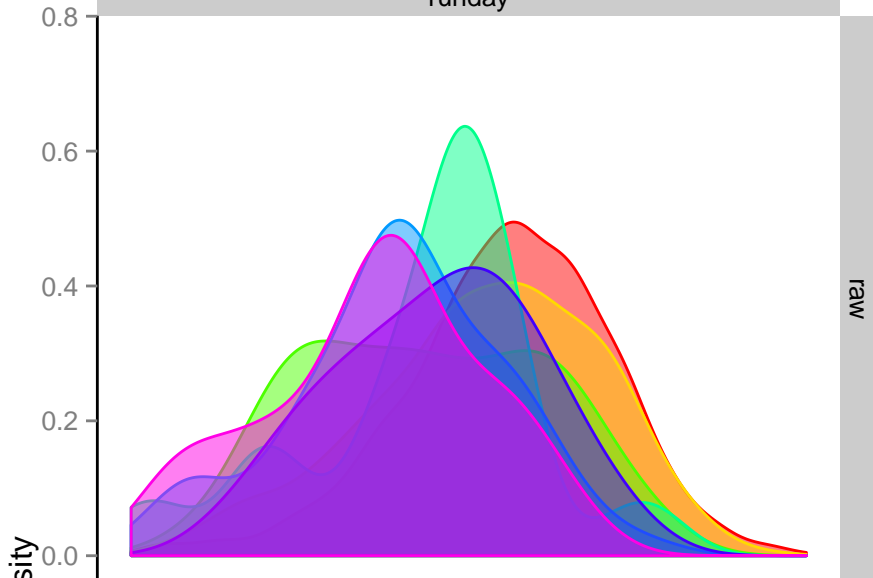

raw

## PLATFORMRUNDAY\_miss

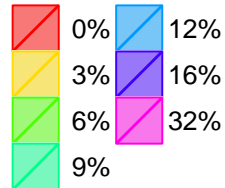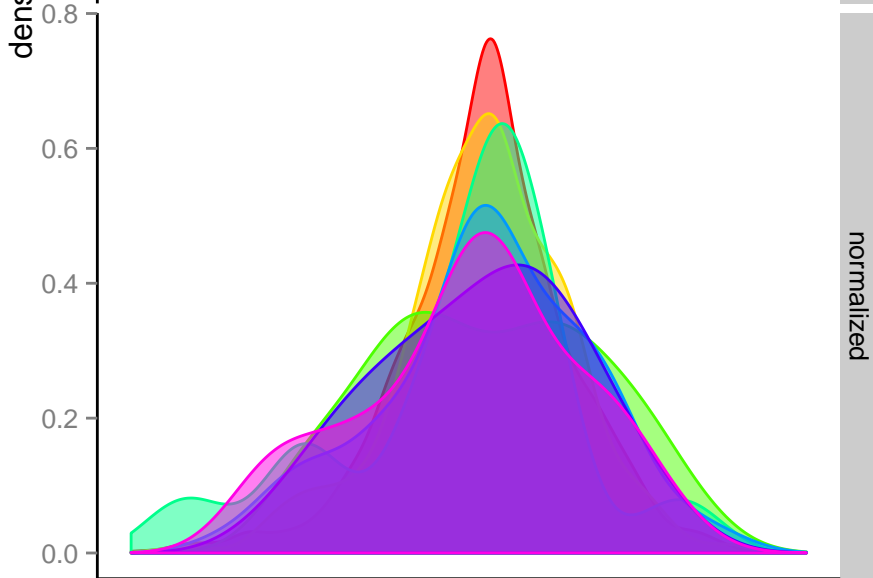

normalized

log(ion counts)



# biliverdin

runday

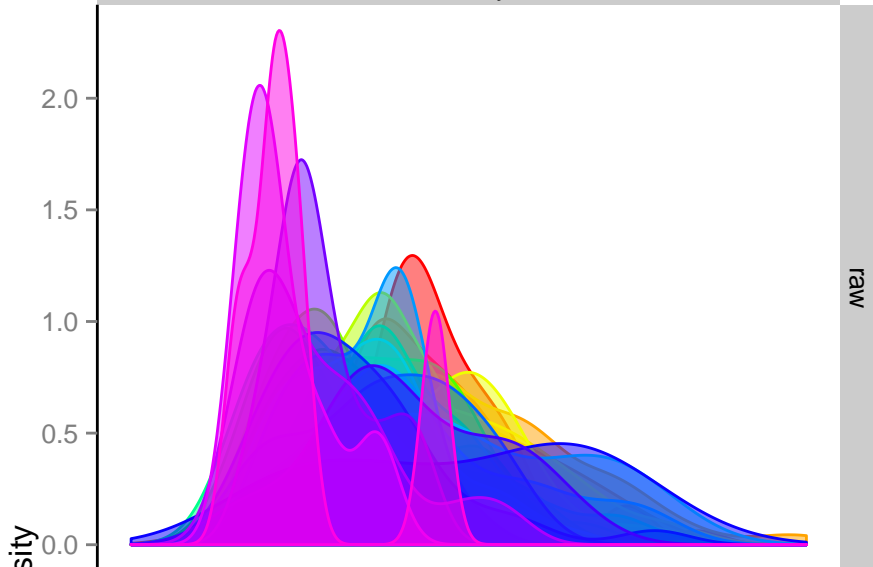

raw

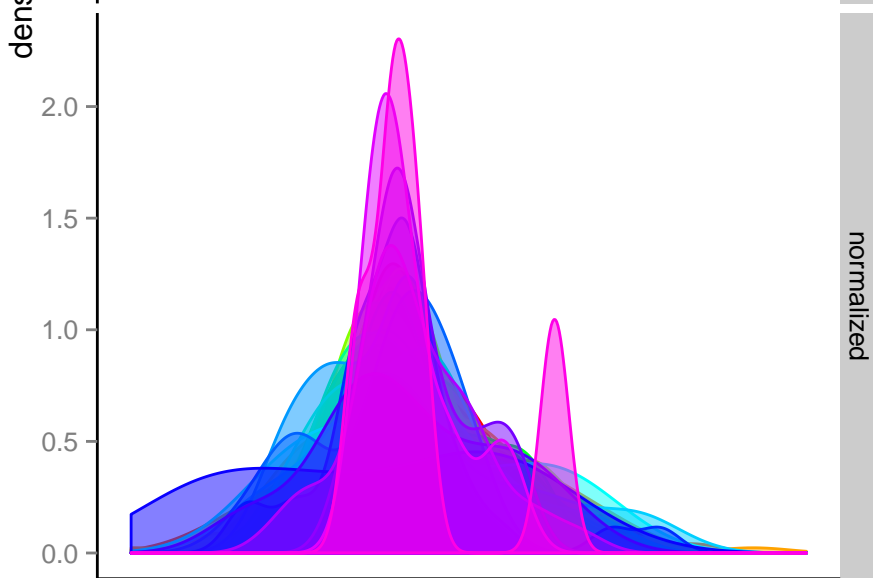

normalized

## PLATFORMRUNDAY\_miss

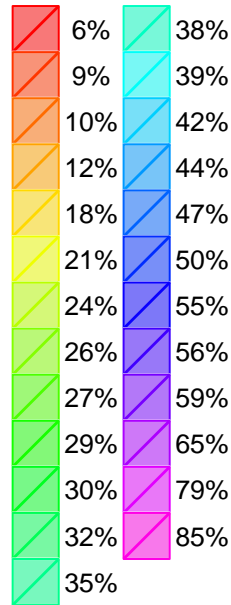

# bradykinin; des-arg(9)

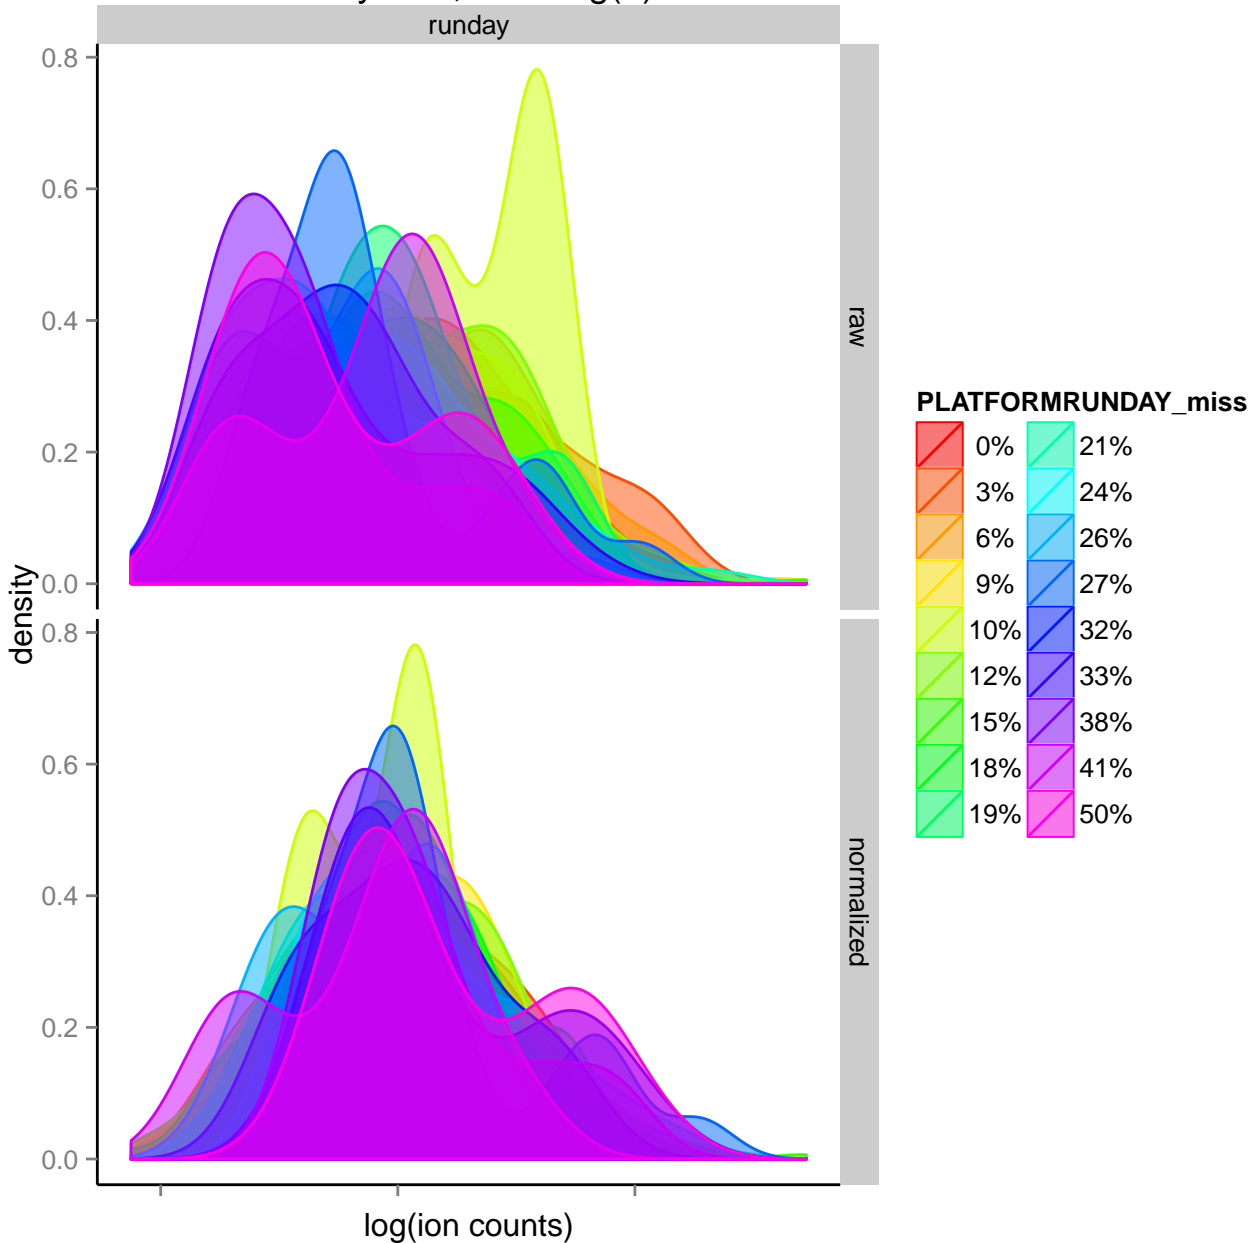

# butyrylcarnitine

runday

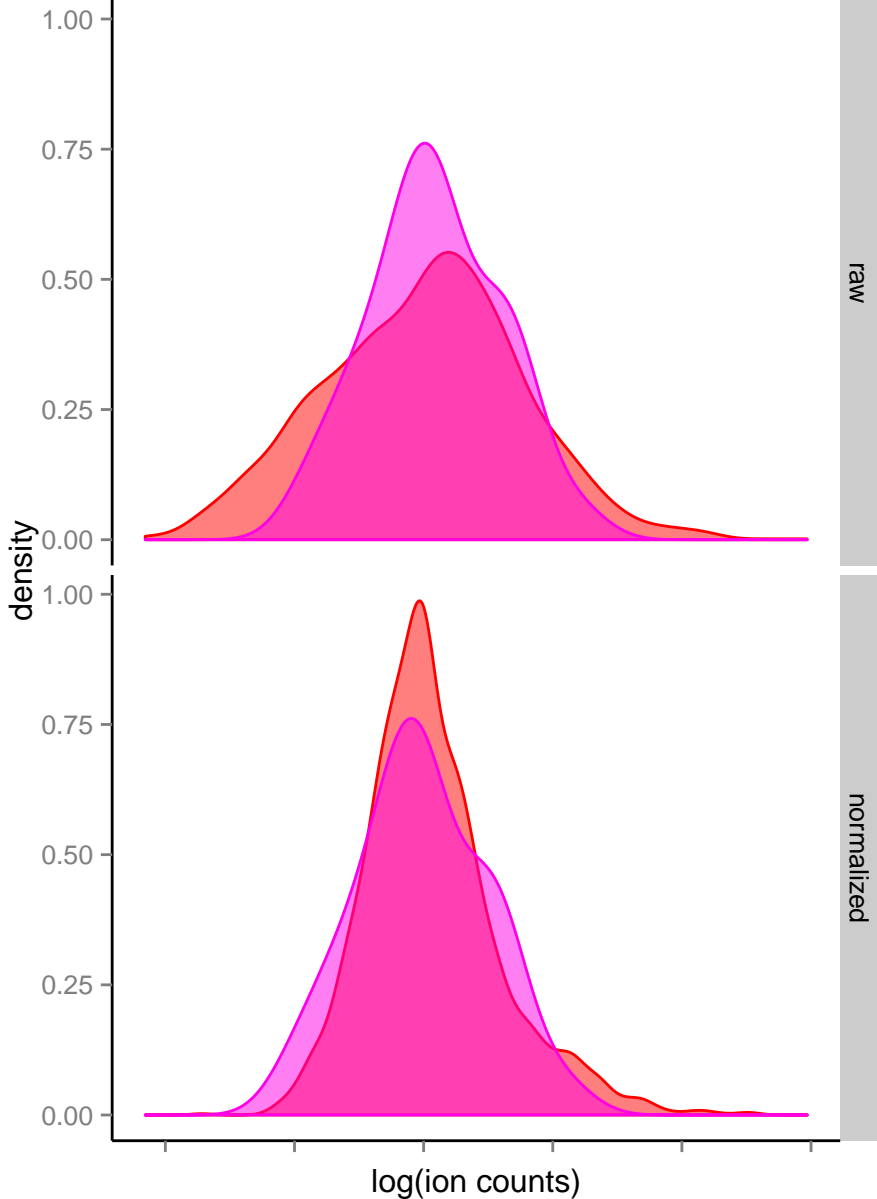

# C-glycosyltryptophan\*

runday

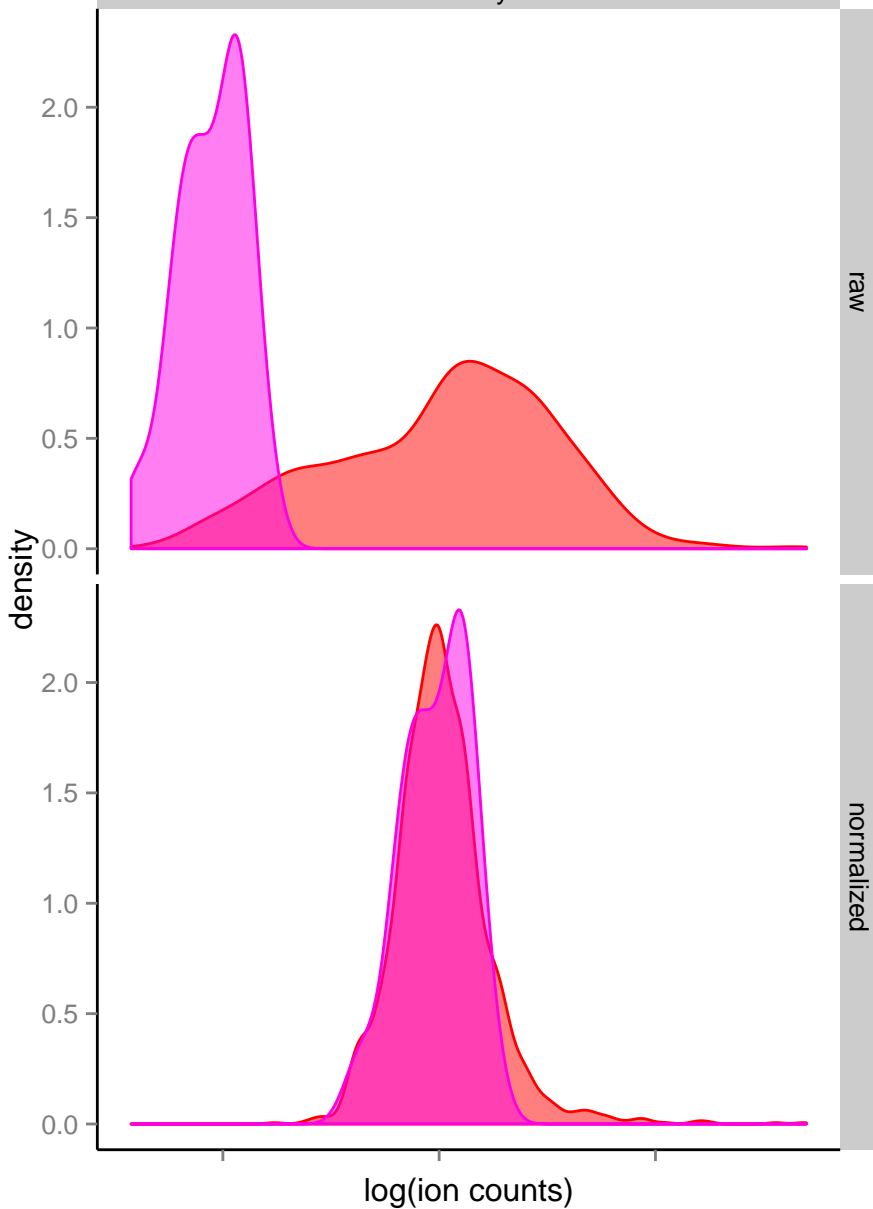

raw

normalized

PLATFORMRUNDAY\_miss



0%

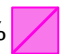

3%

# caffeine

runday

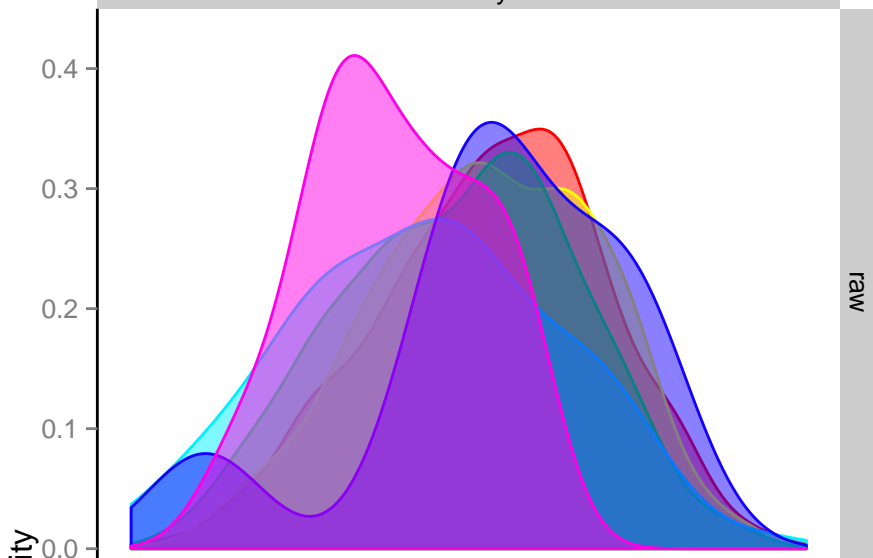

raw

## PLATFORMRUNDAY\_miss

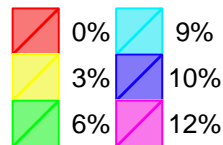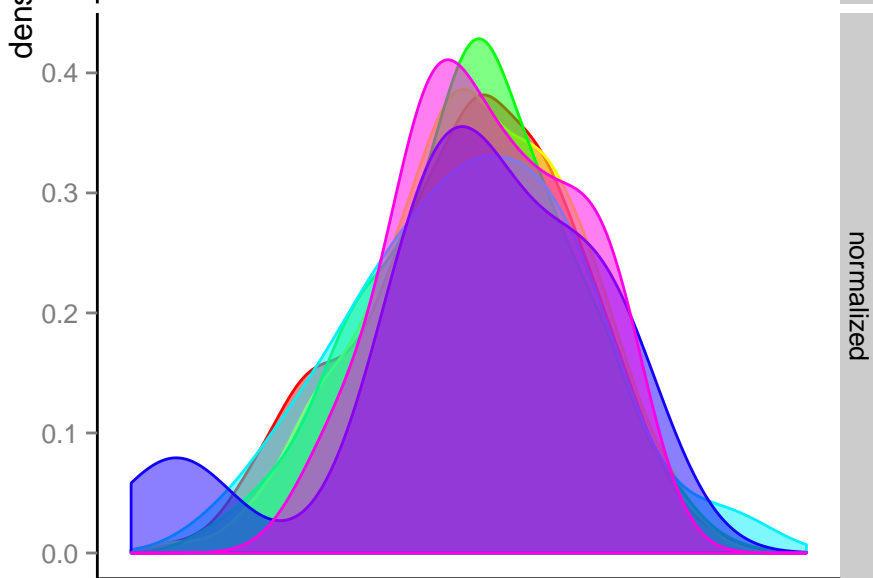

normalized

log(ion counts)

caprate (10:0)

runday

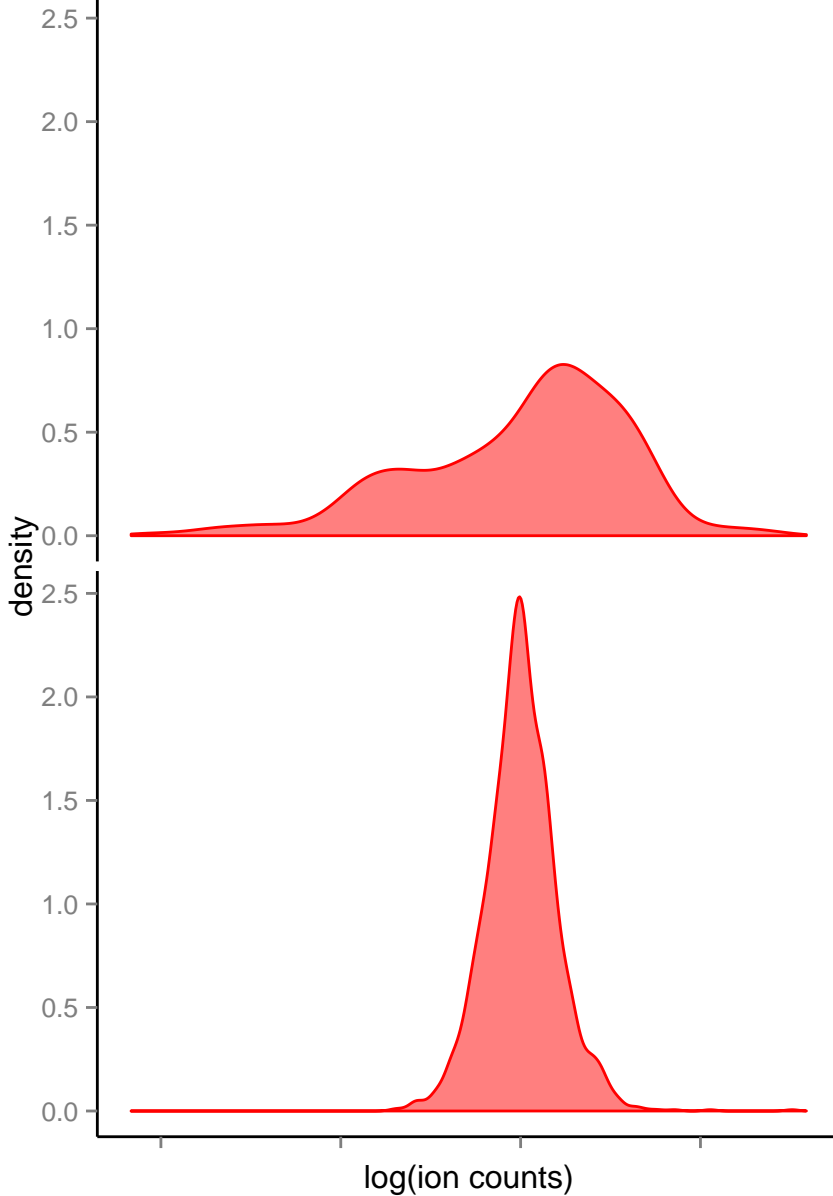

raw

normalized

PLATFORMRUNDAY\_miss

0%

caproate (6:0)

runday

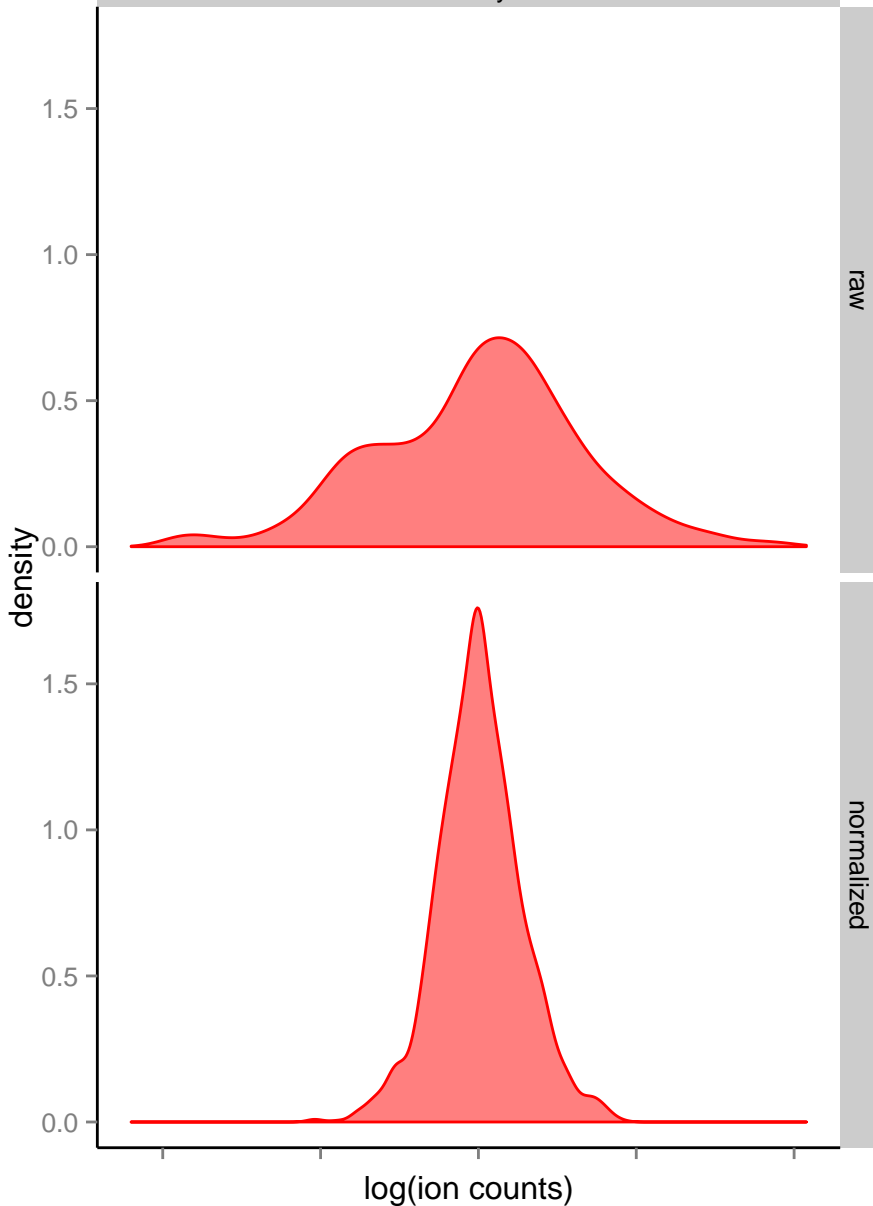

PLATFORMRUNDAY\_miss

0%

# caprylate (8:0)

runday

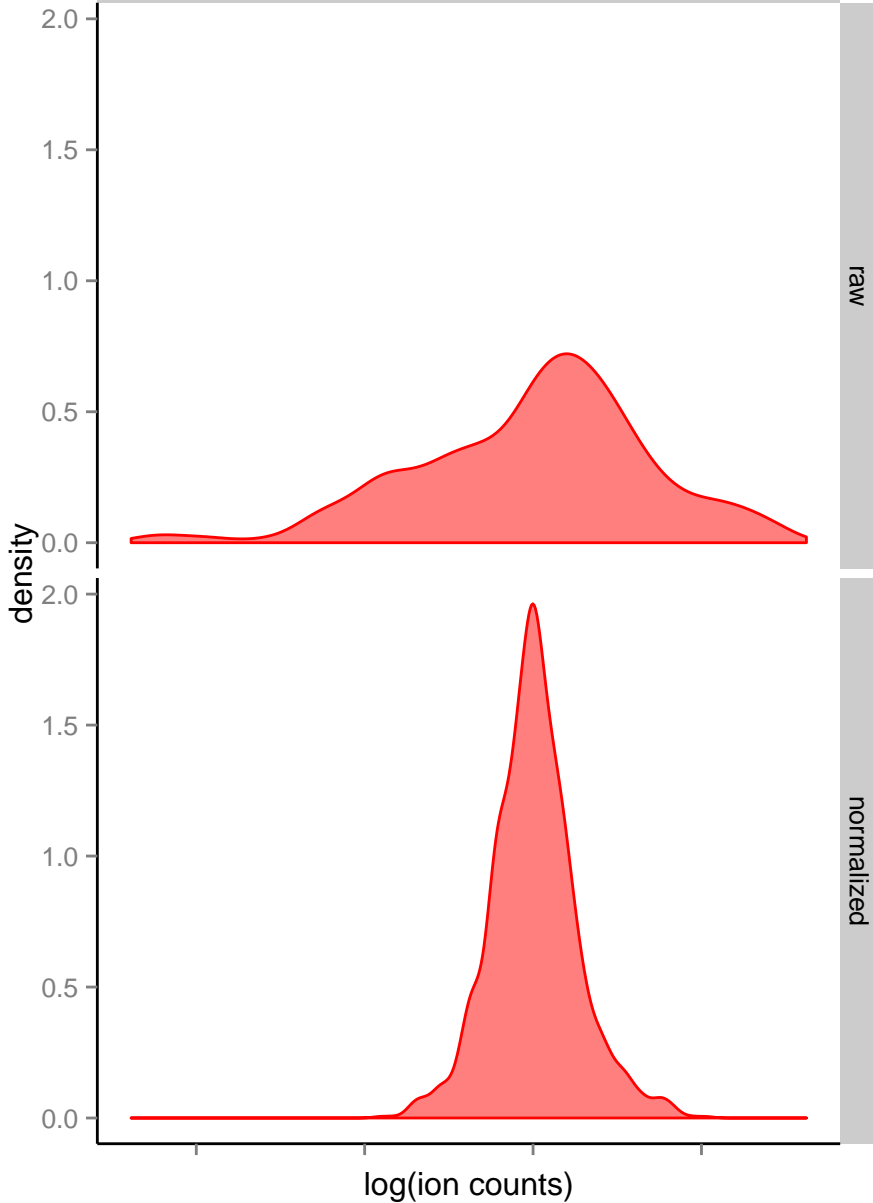

PLATFORMRUNDAY\_miss

0%



# carbamazepine\*

runday

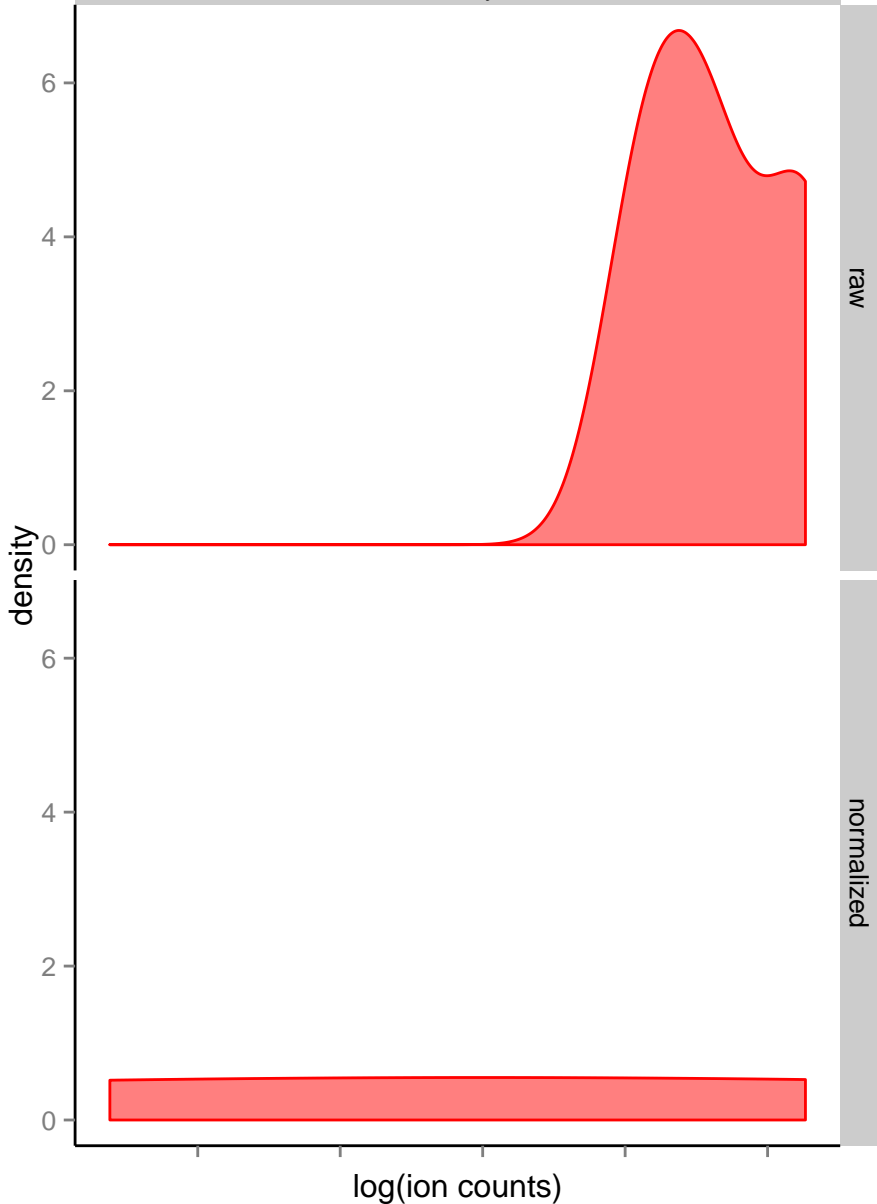

raw

normalized

**PLATFORMRUNDAY\_miss**

97%

# carnitine

runday

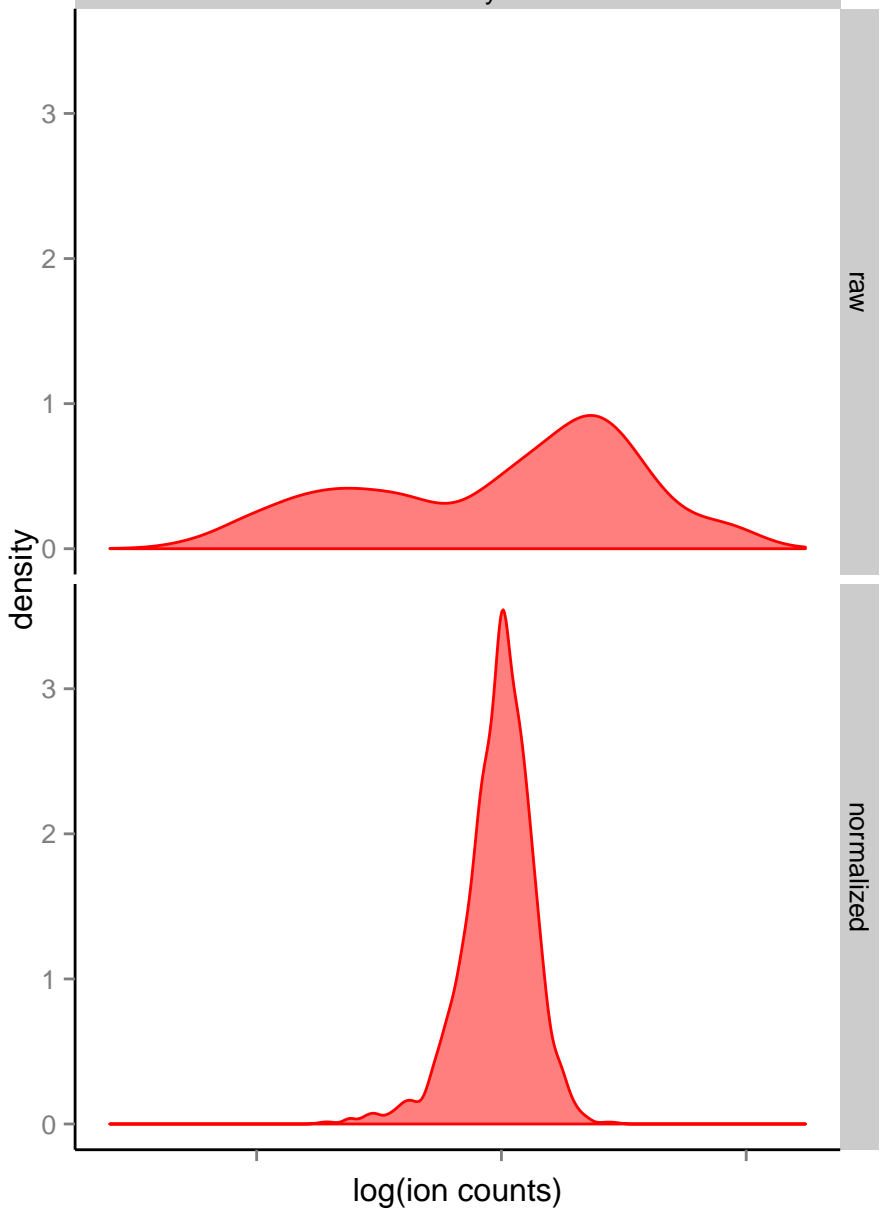

raw

normalized

**PLATFORMRUNDAY\_miss**

0%

# catechol sulfate

runday

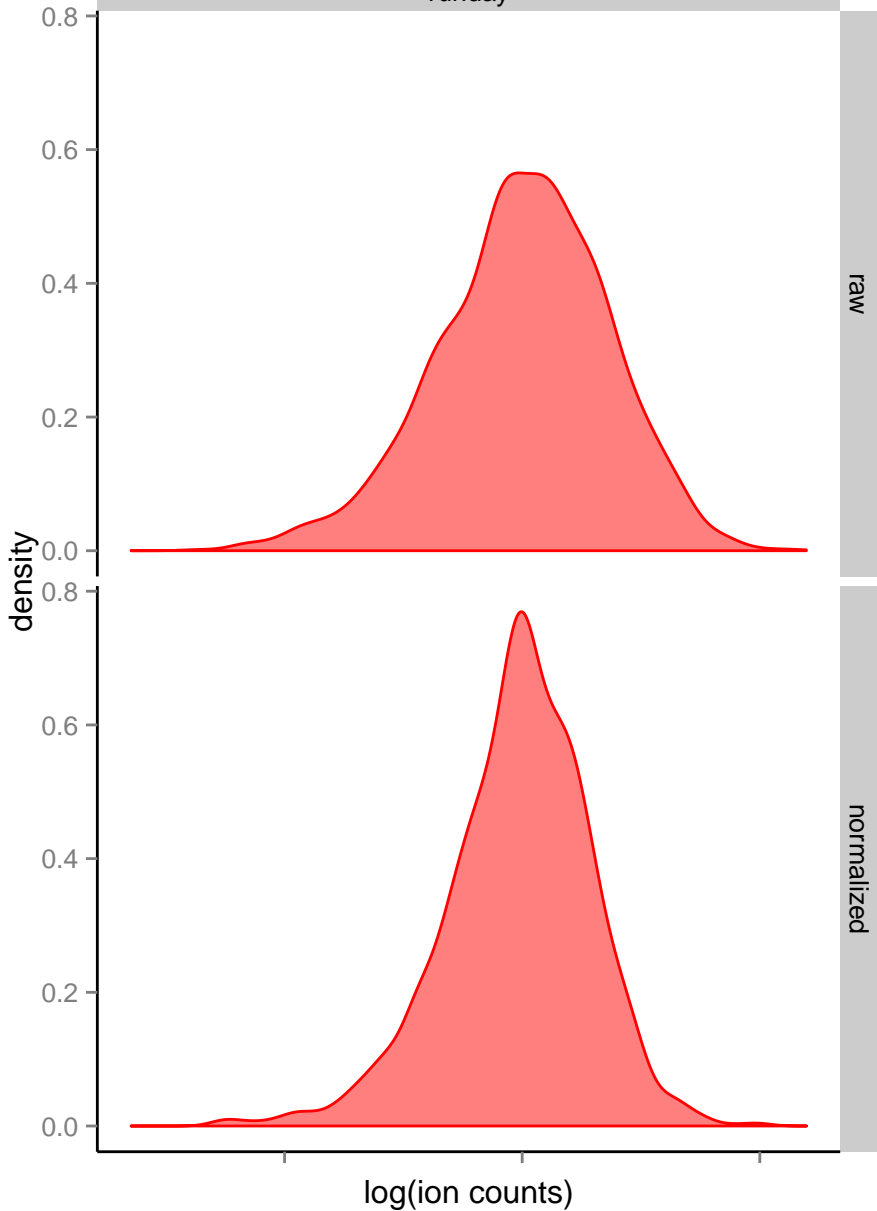

PLATFORMRUNDAY\_miss

0%

# cholate

runday

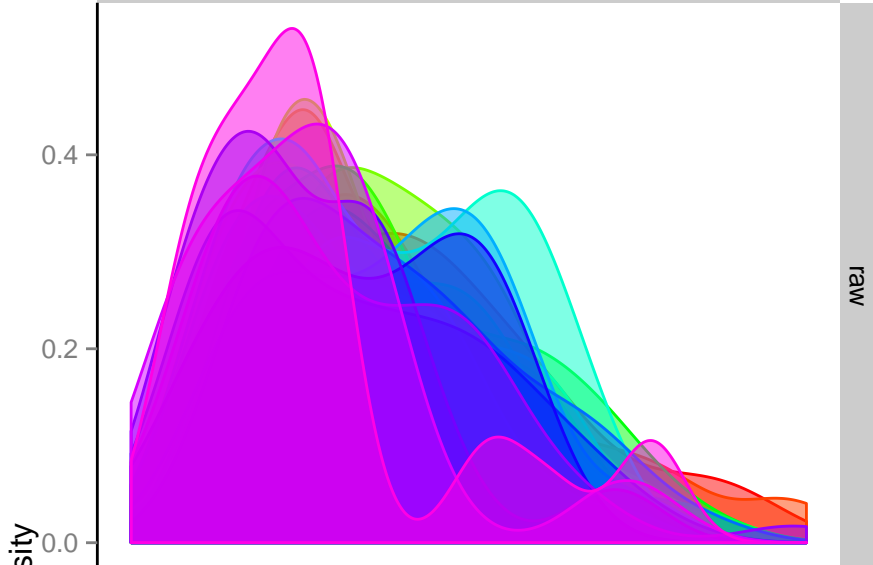

raw

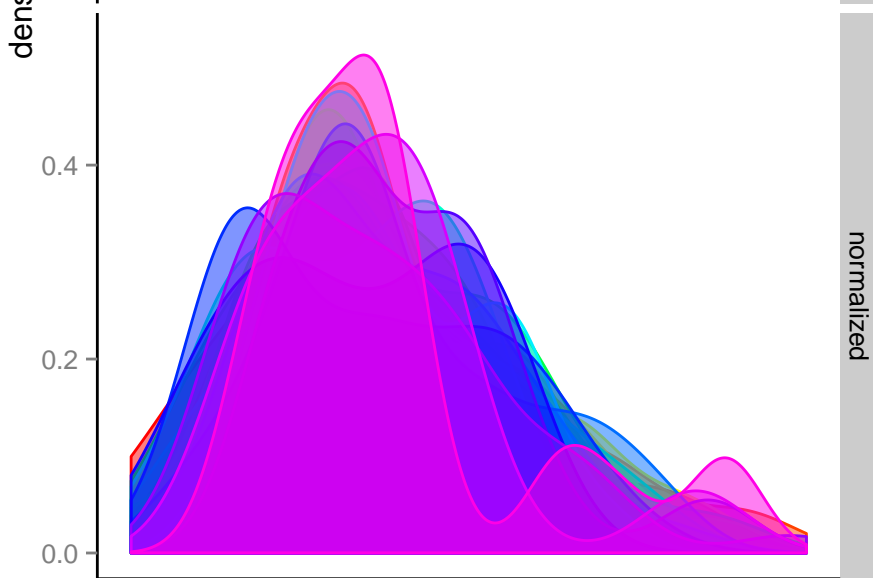

normalized

## PLATFORMRUNDAY\_miss

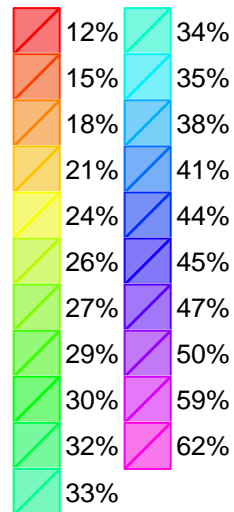

log(ion counts)

# cholesterol

runday

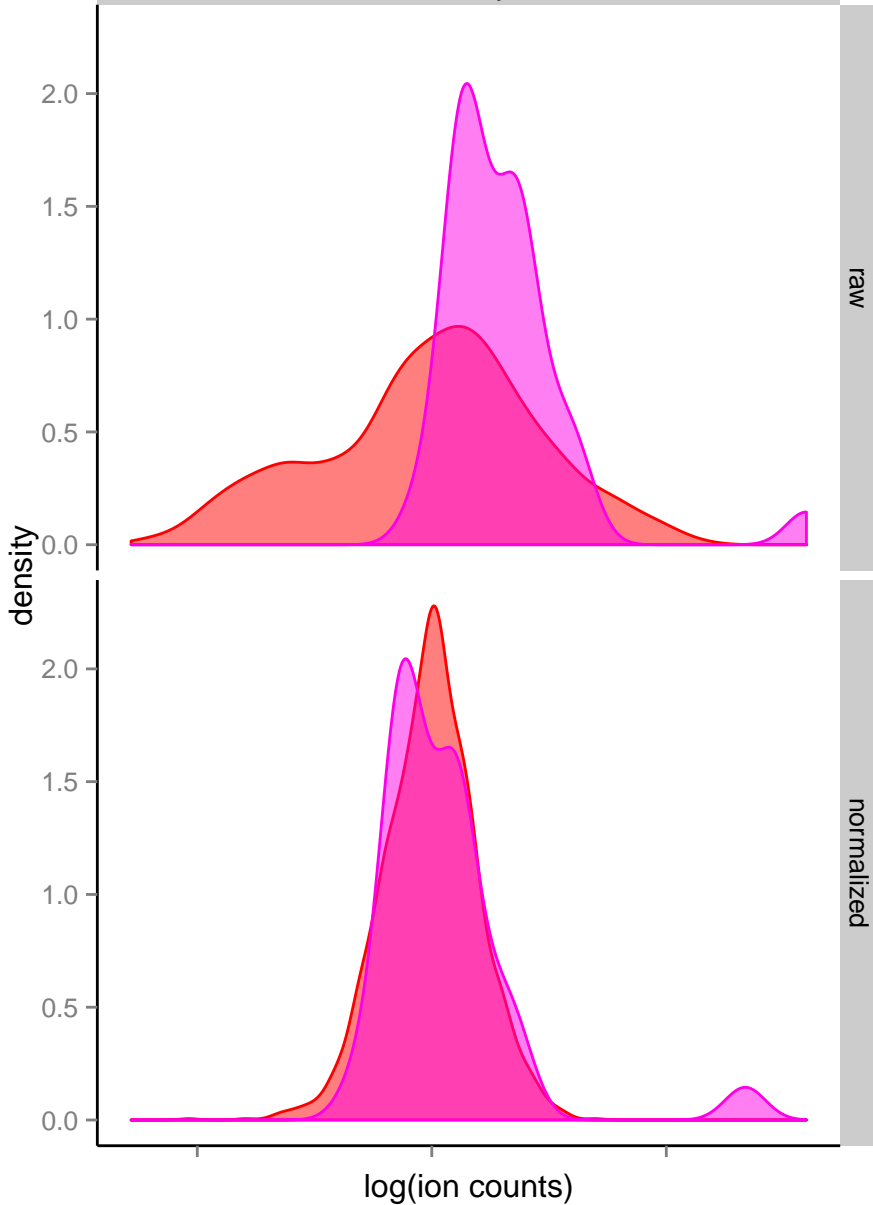

raw

normalized

**PLATFORMRUNDAY\_miss**



0%

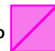

3%

# choline

runday

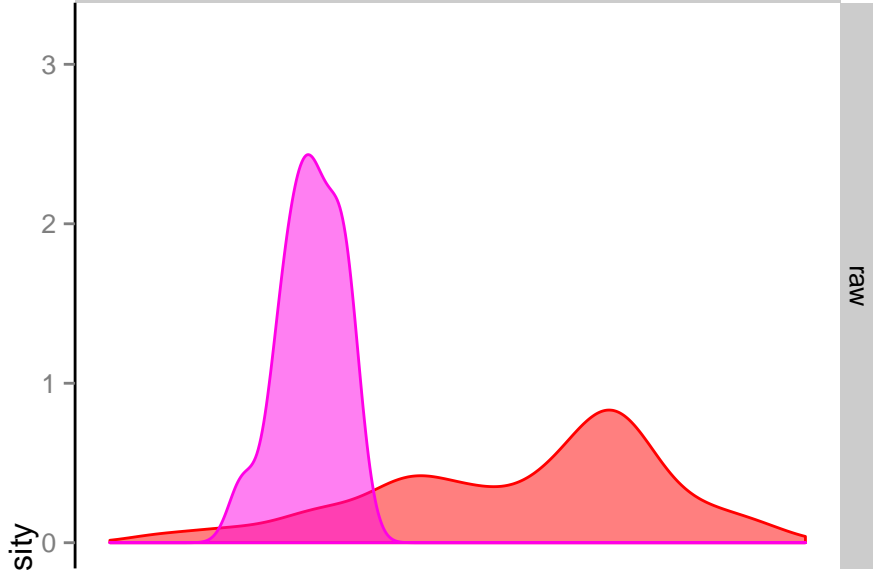

**PLATFORMRUNDAY\_miss**

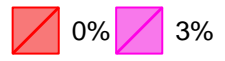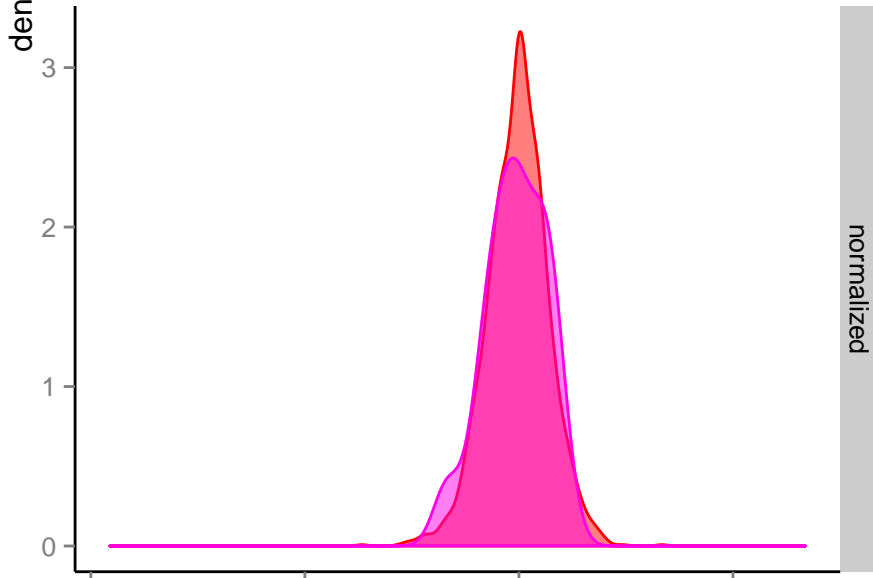

log(ion counts)

citrate

runday

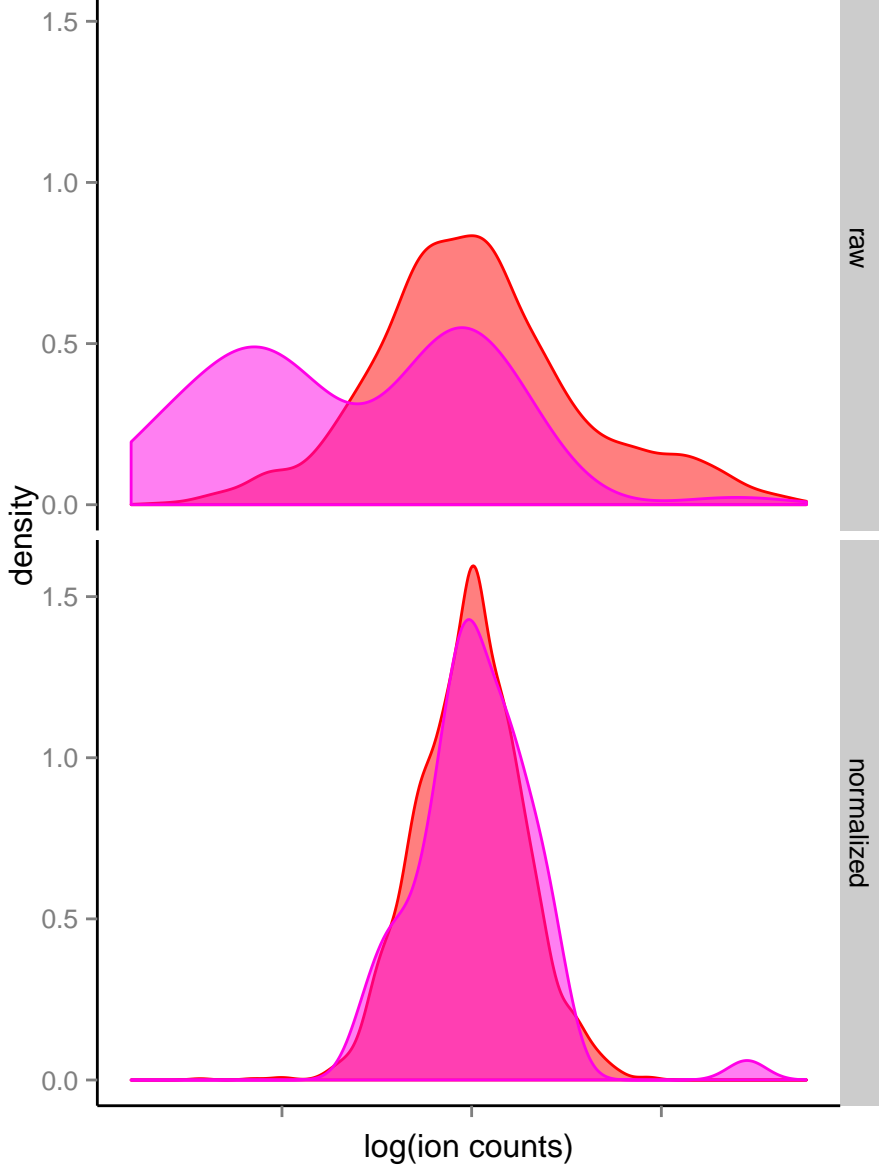

raw

normalized

**PLATFORMRUNDAY\_miss**

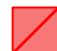

0%

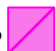

3%

# citrulline

runday

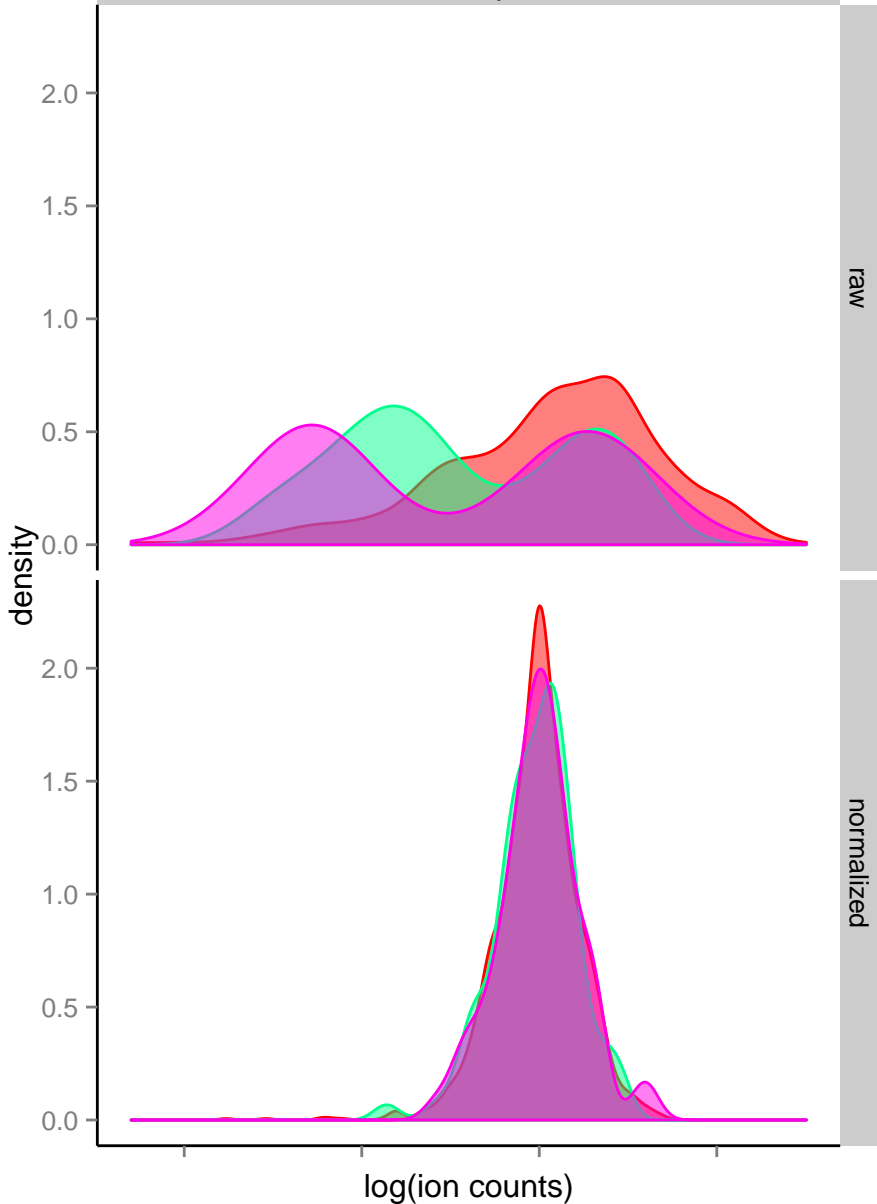

raw

normalized

**PLATFORMRUNDAY\_miss**





# cortisol

runday

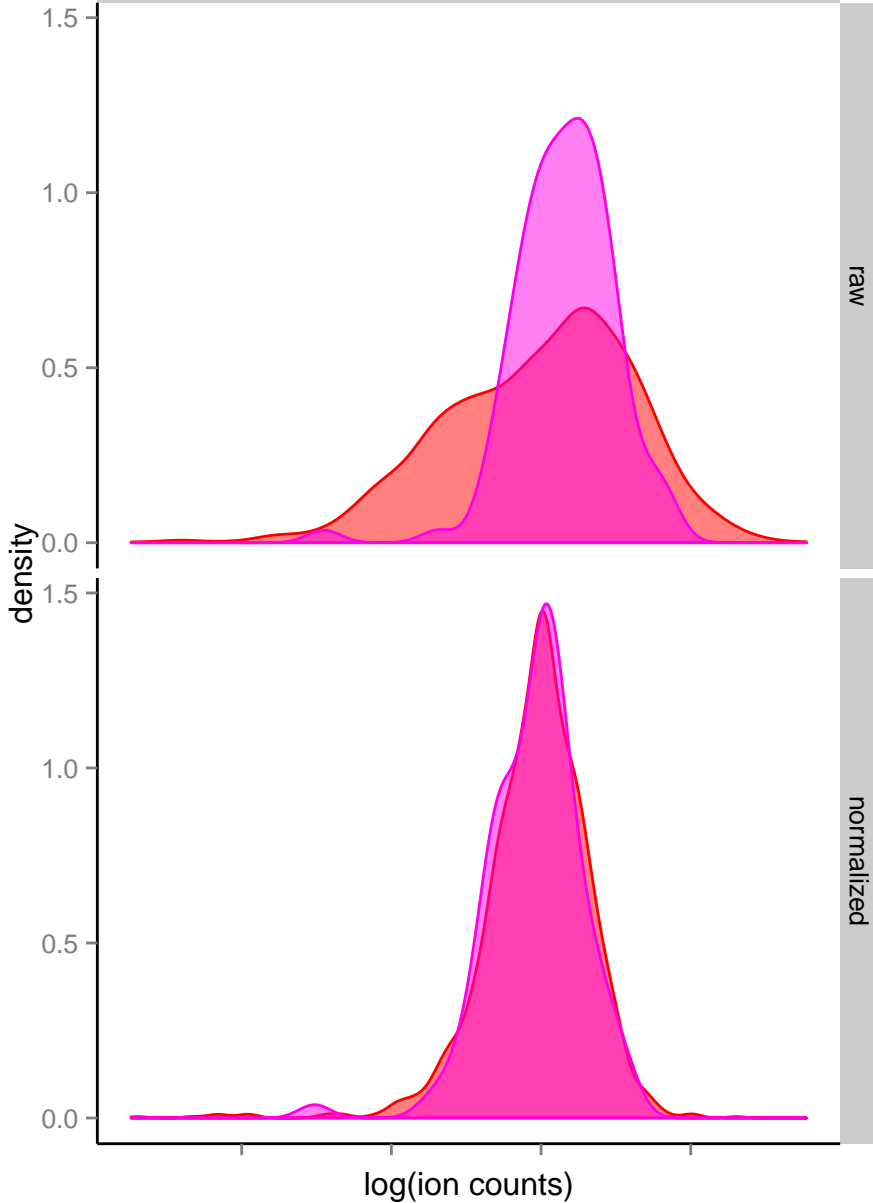

raw

normalized

**PLATFORMRUNDAY\_miss**



0%

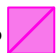

3%

log(ion counts)

# cortisone

runday

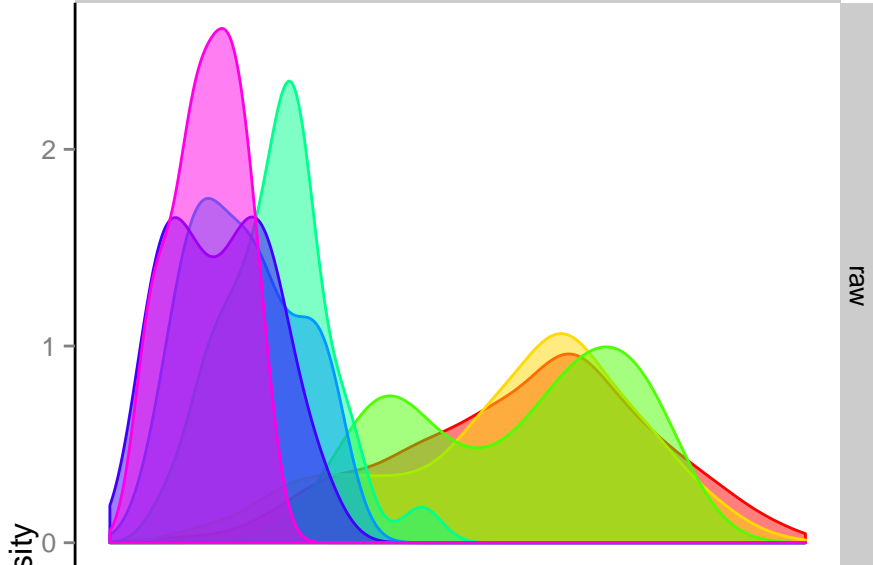

## PLATFORMRUNDAY\_miss

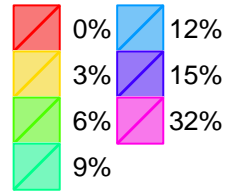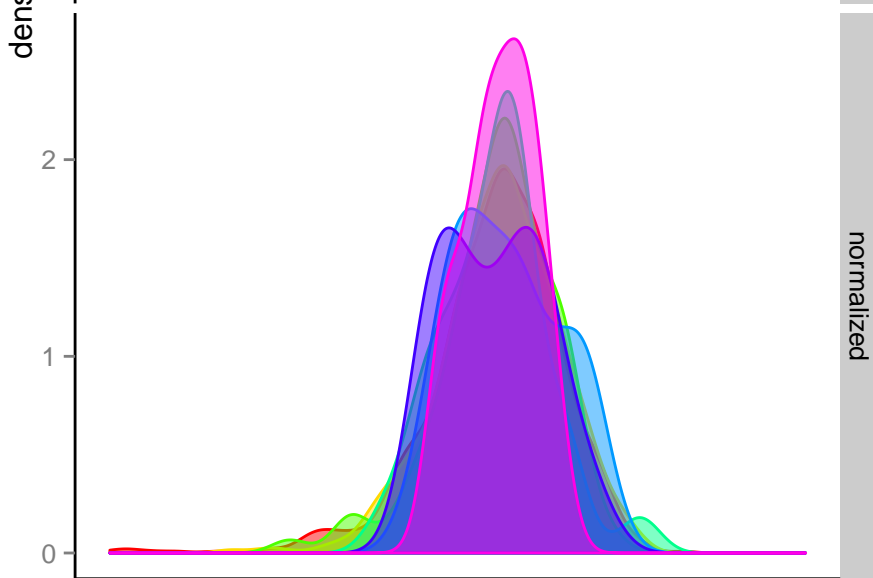

log(ion counts)

# cotinine

runday

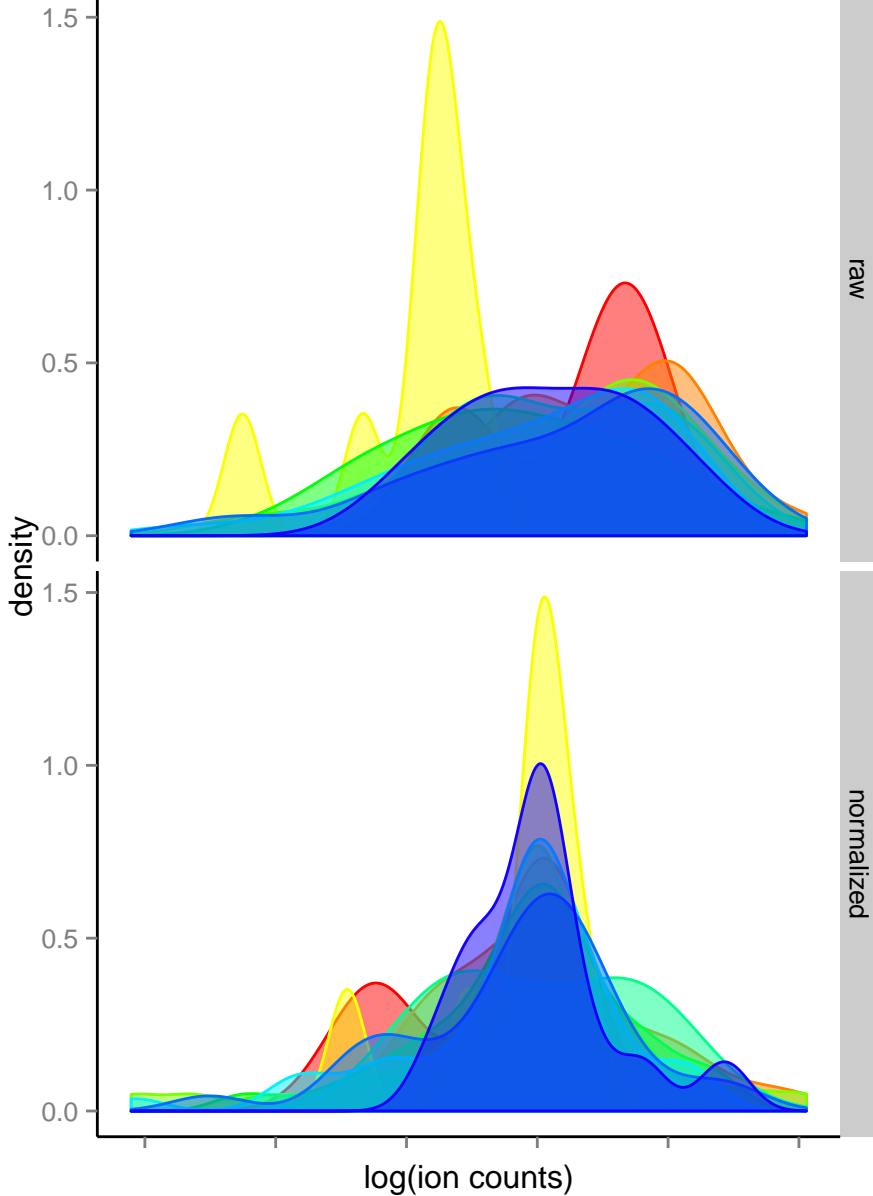

raw

normalized

## PLATFORMRUNDAY\_miss

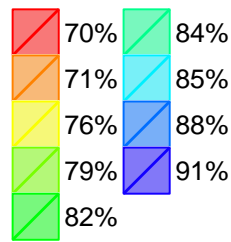

# creatine

runday

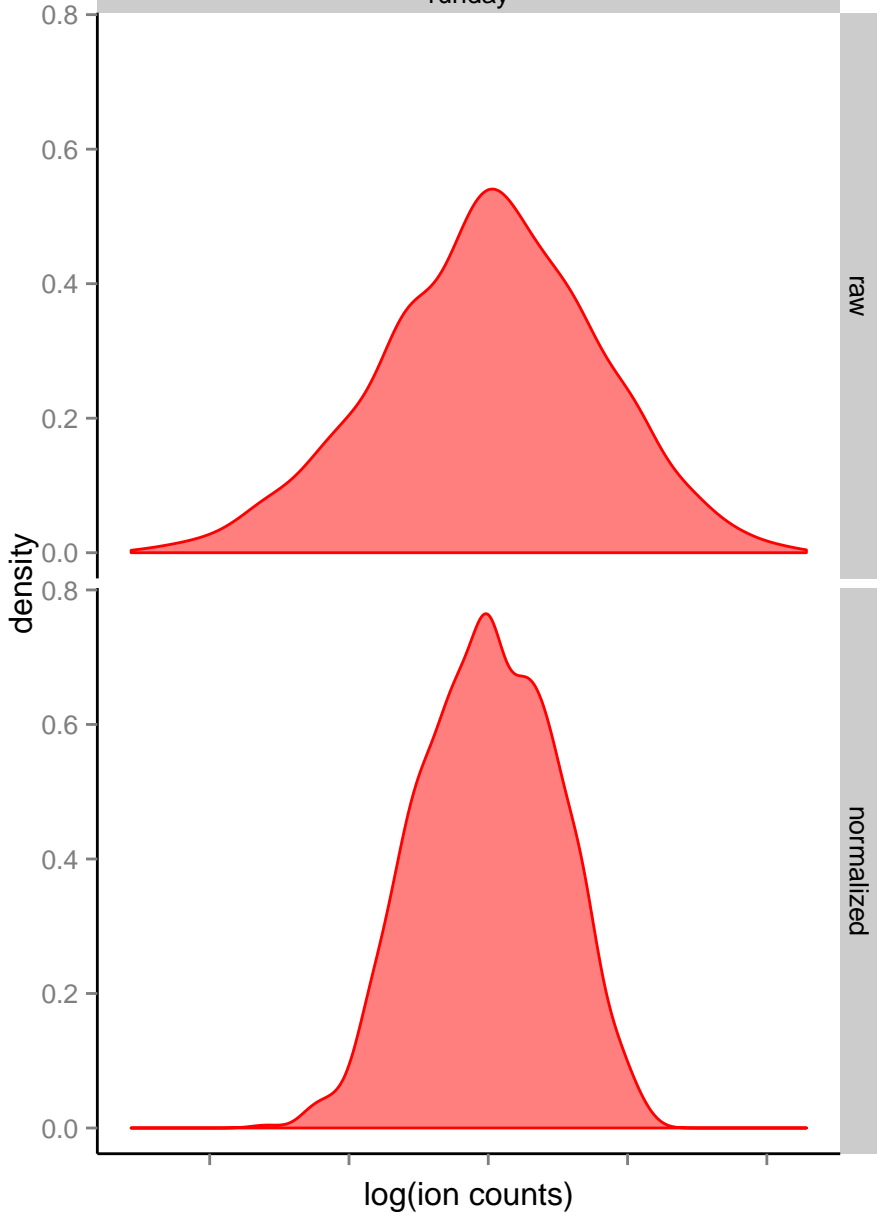

**PLATFORMRUNDAY\_miss**

0%

# creatinine

runday

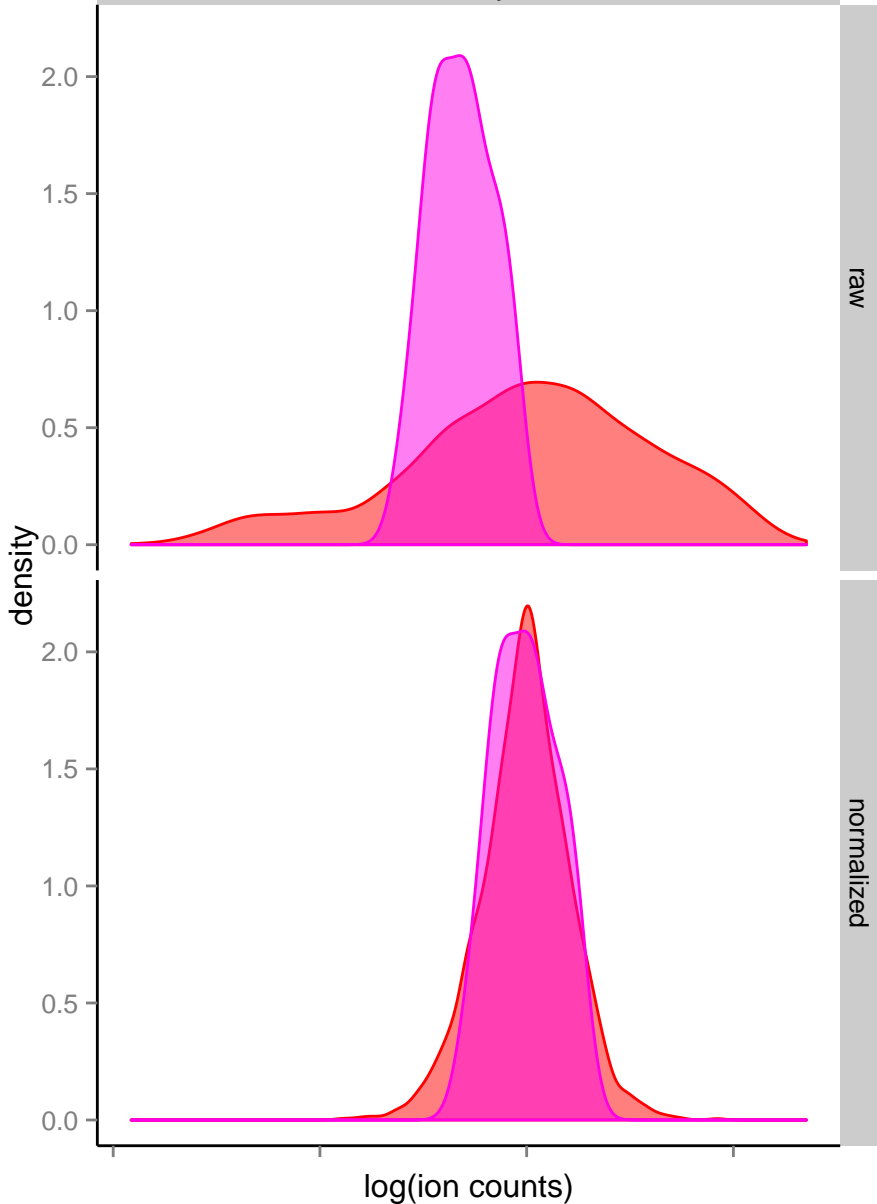

raw

normalized

**PLATFORMRUNDAY\_miss**



0%



3%

# cysteine

runday

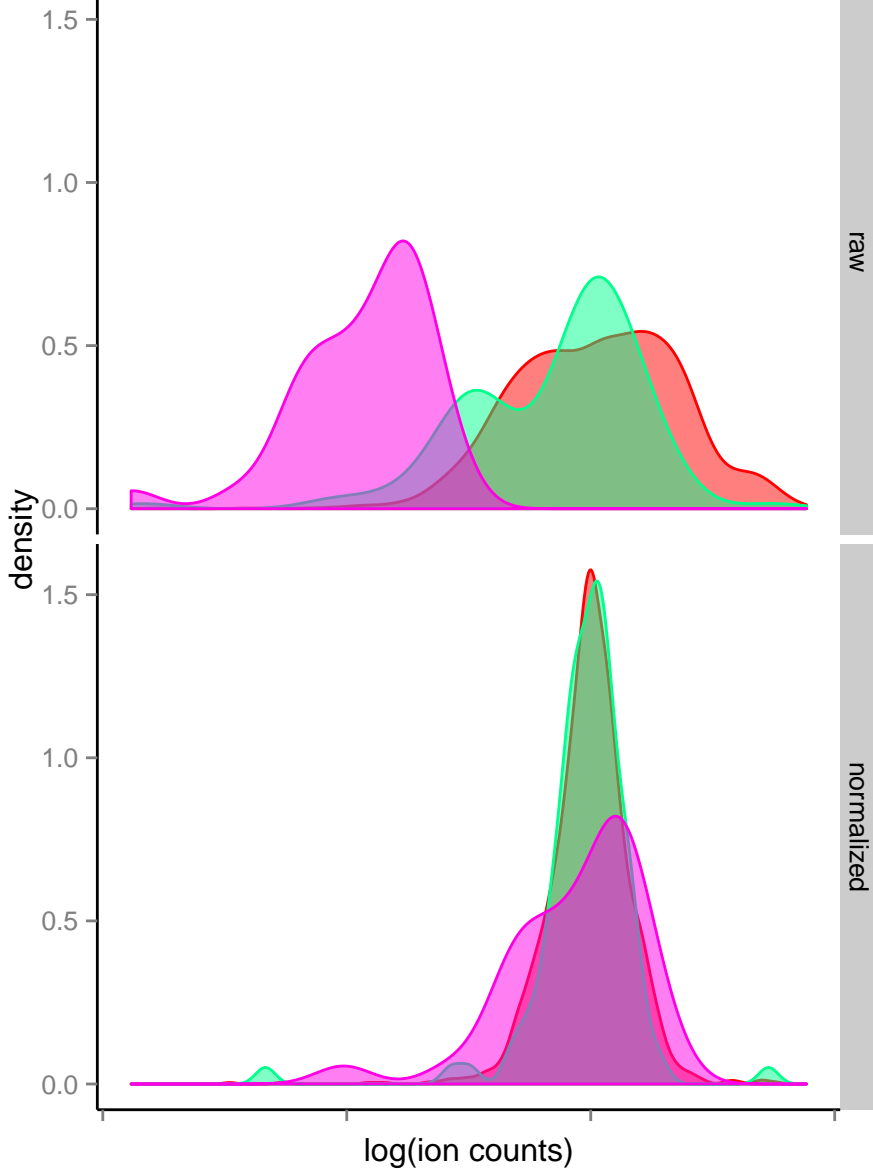

**PLATFORMRUNDAY\_miss**

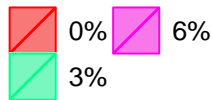

# cysteine–glutathione disulfide

runday

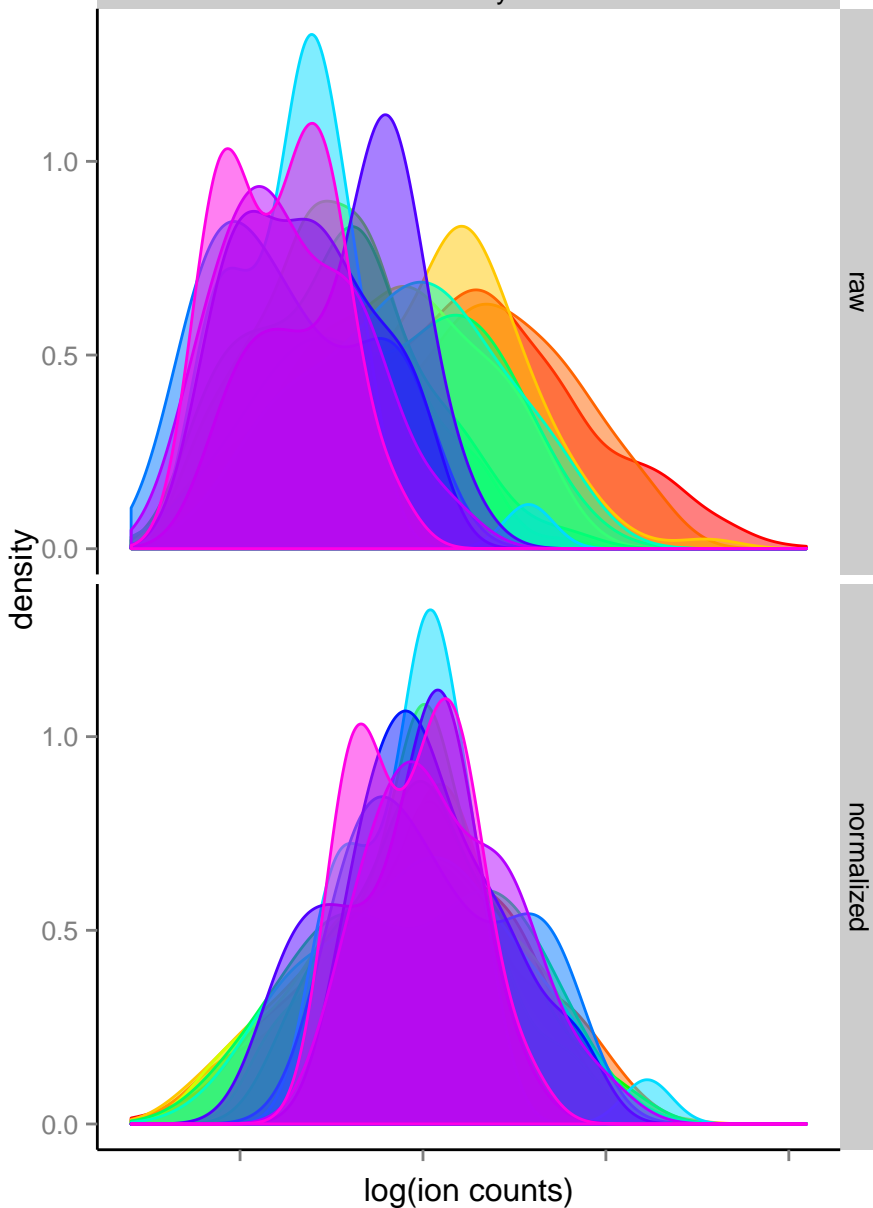

**PLATFORMRUNDAY\_miss**

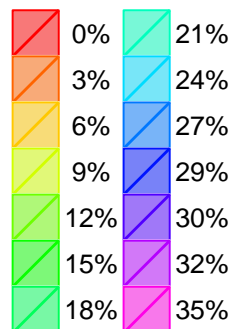

# cystine

runday

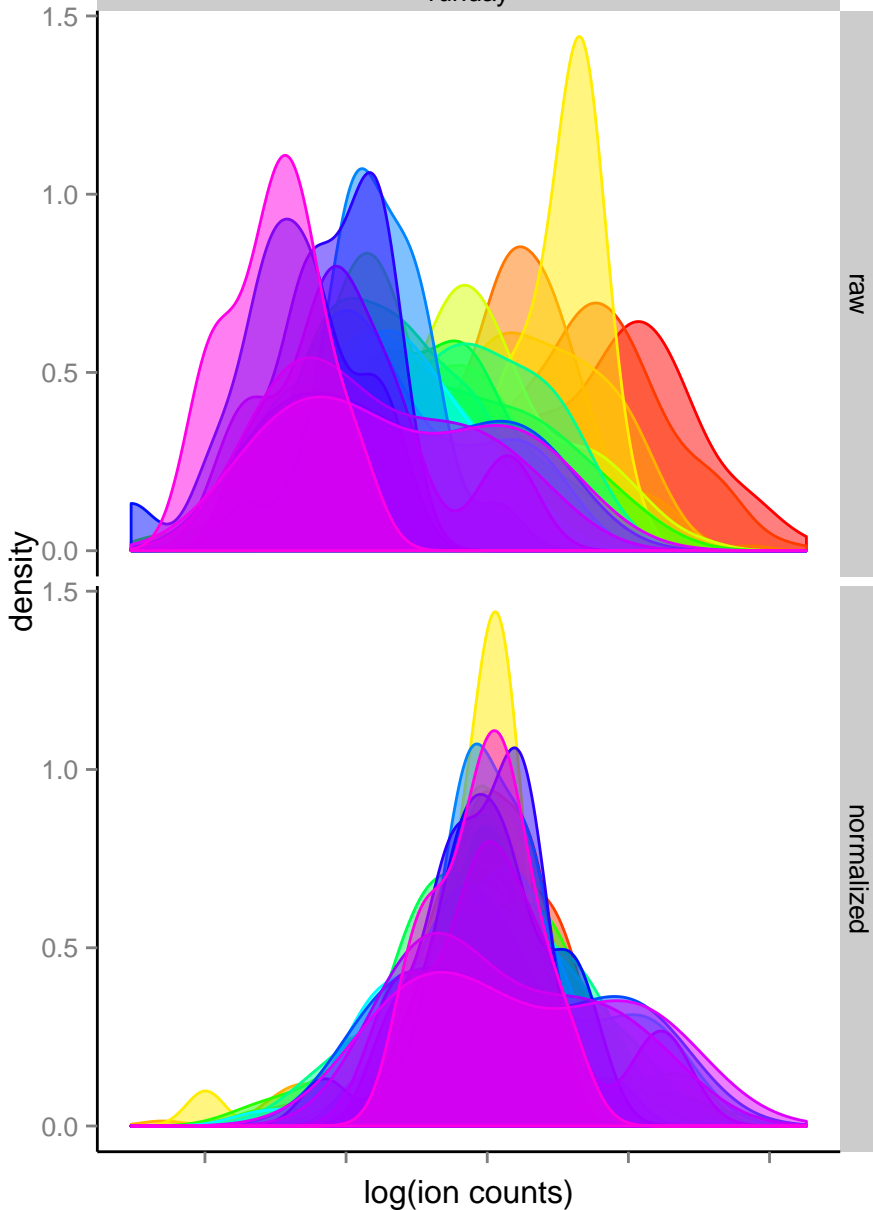

## PLATFORMRUNDAY\_miss

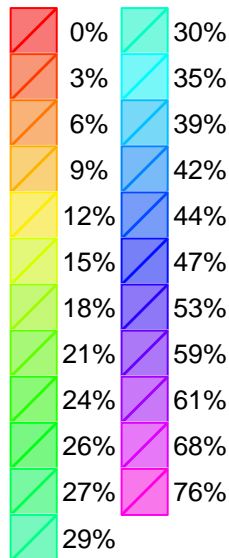



# decanoylcarnitine

runday

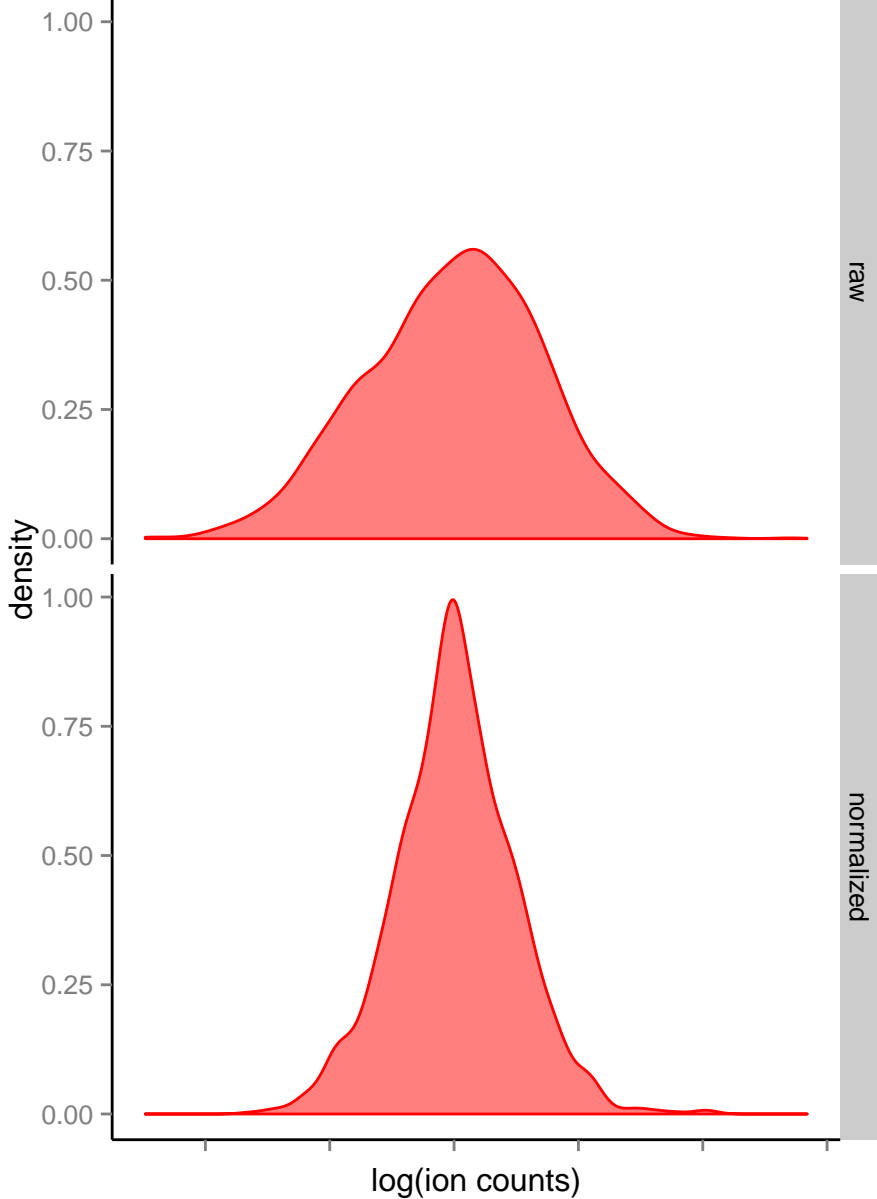

**PLATFORMRUNDAY\_miss**

0%

# dehydroisoandrosterone sulfate (DHEA-S)

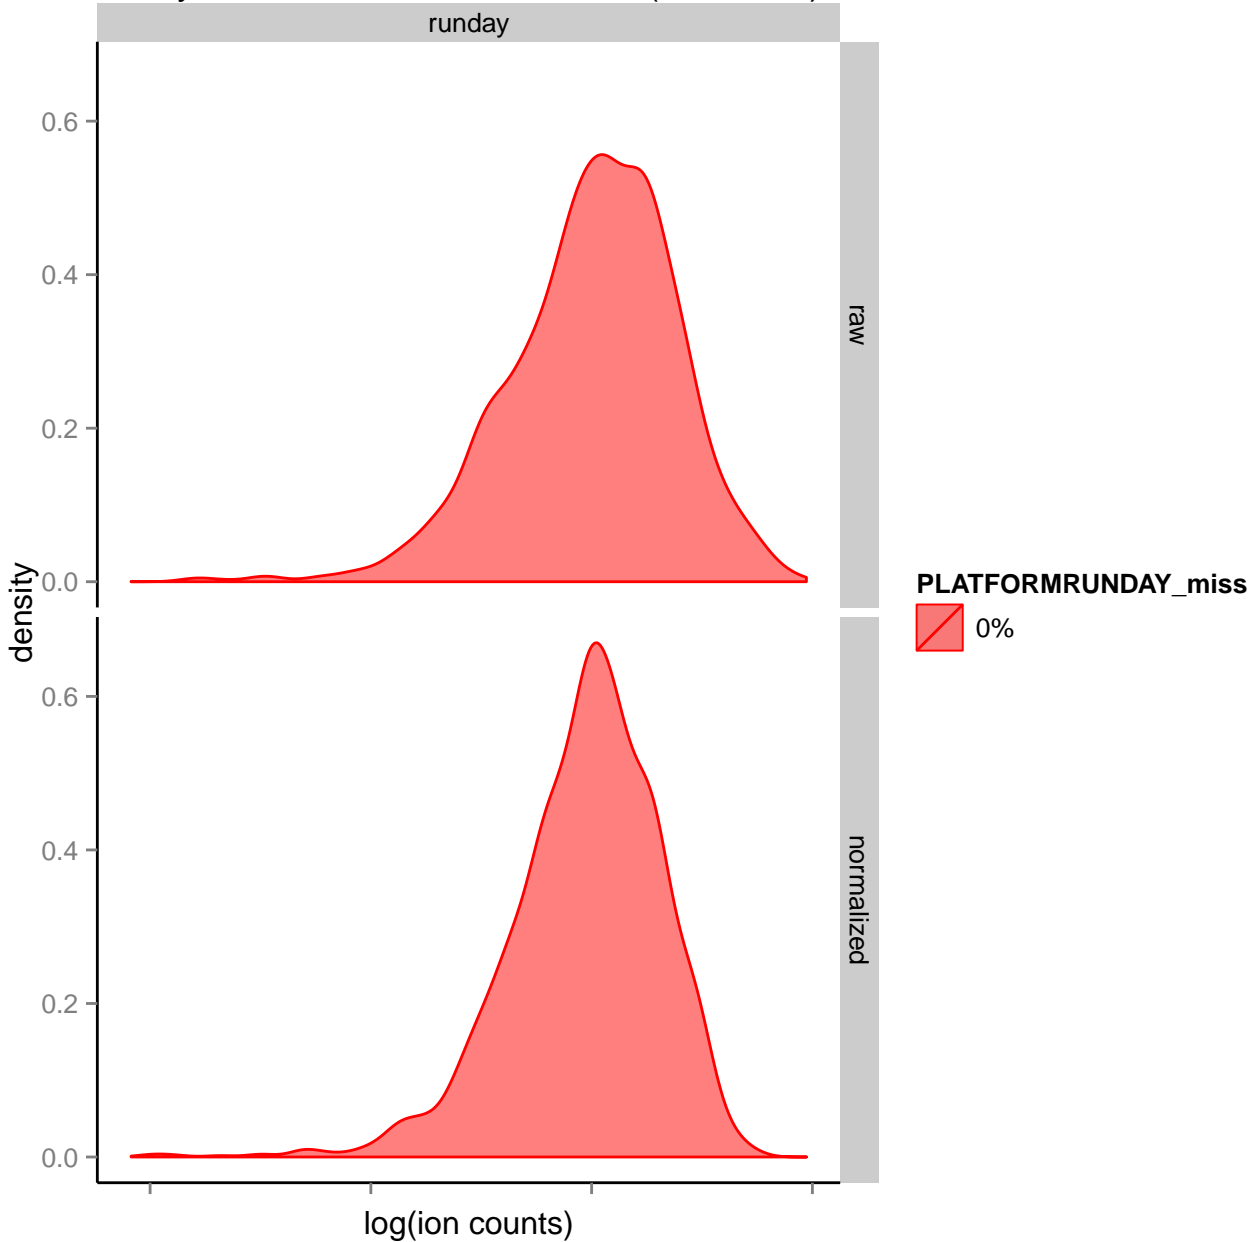

# deoxycholate

runday

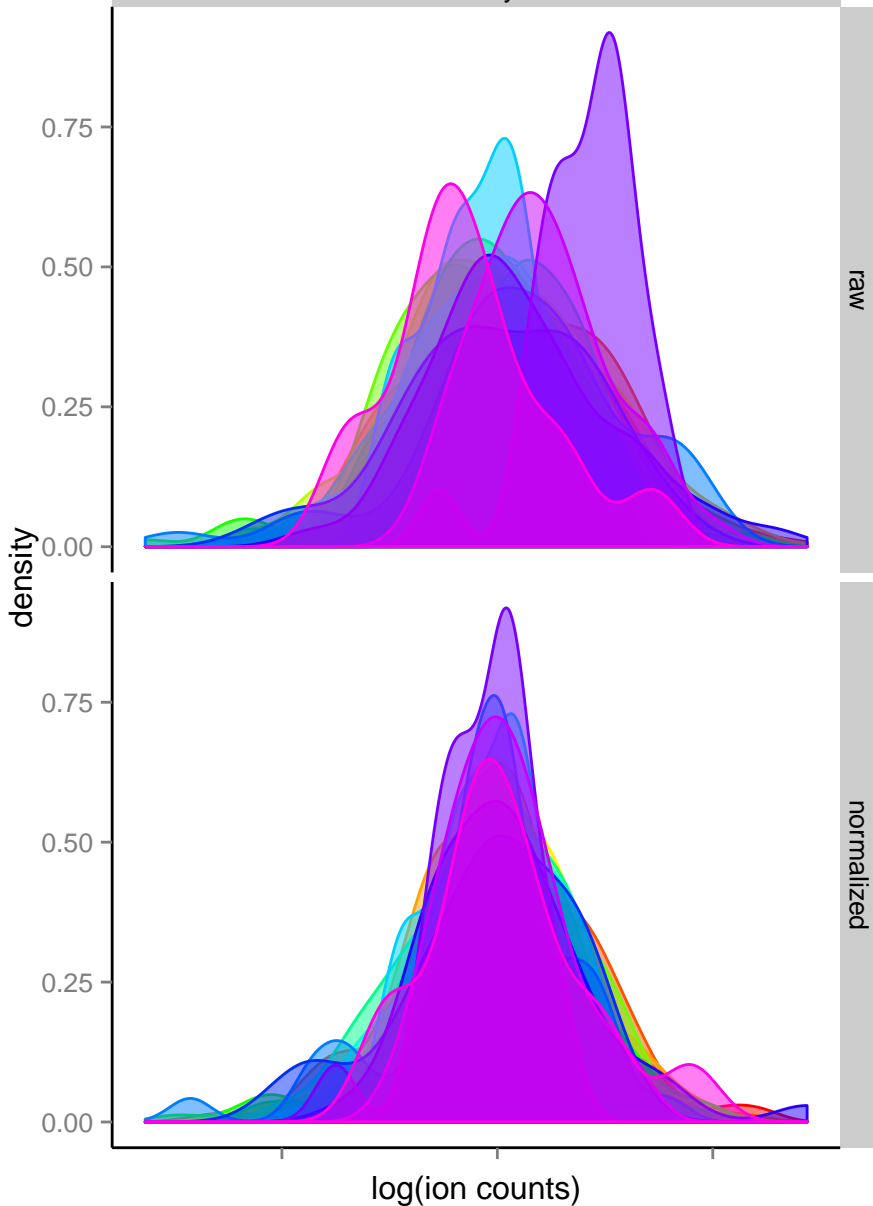

**PLATFORMRUNDAY\_miss**

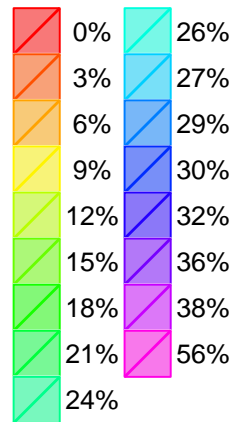

# dihomo-linoleate (20:2n6)

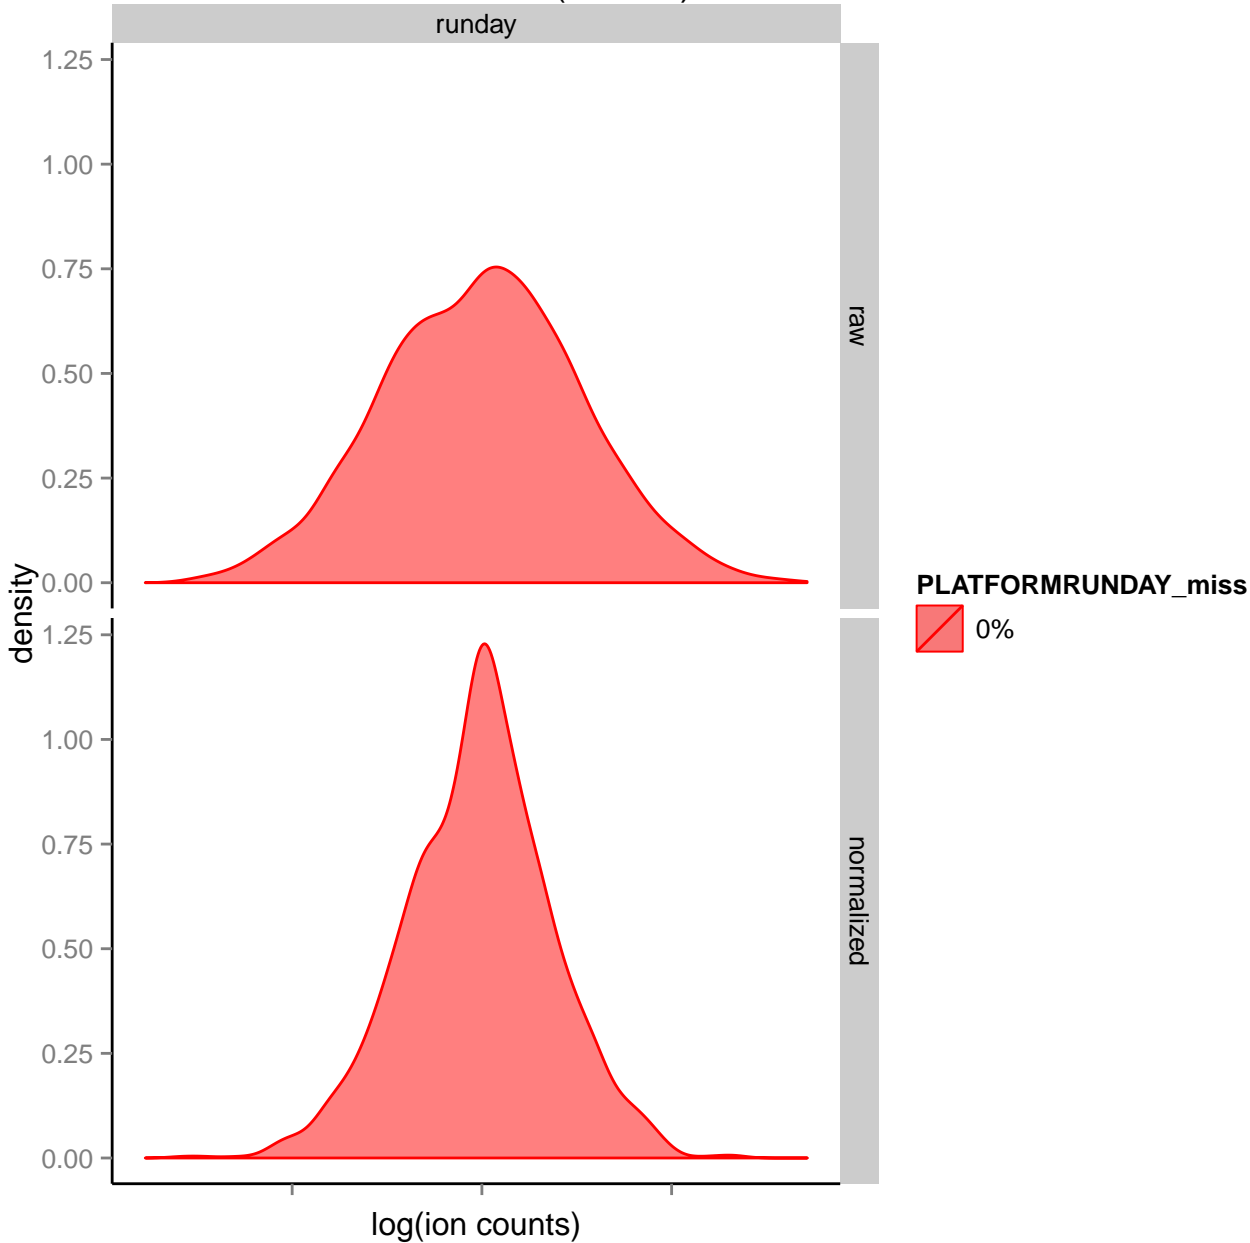

# dihomo-linolenate (20:3n3 or n6)

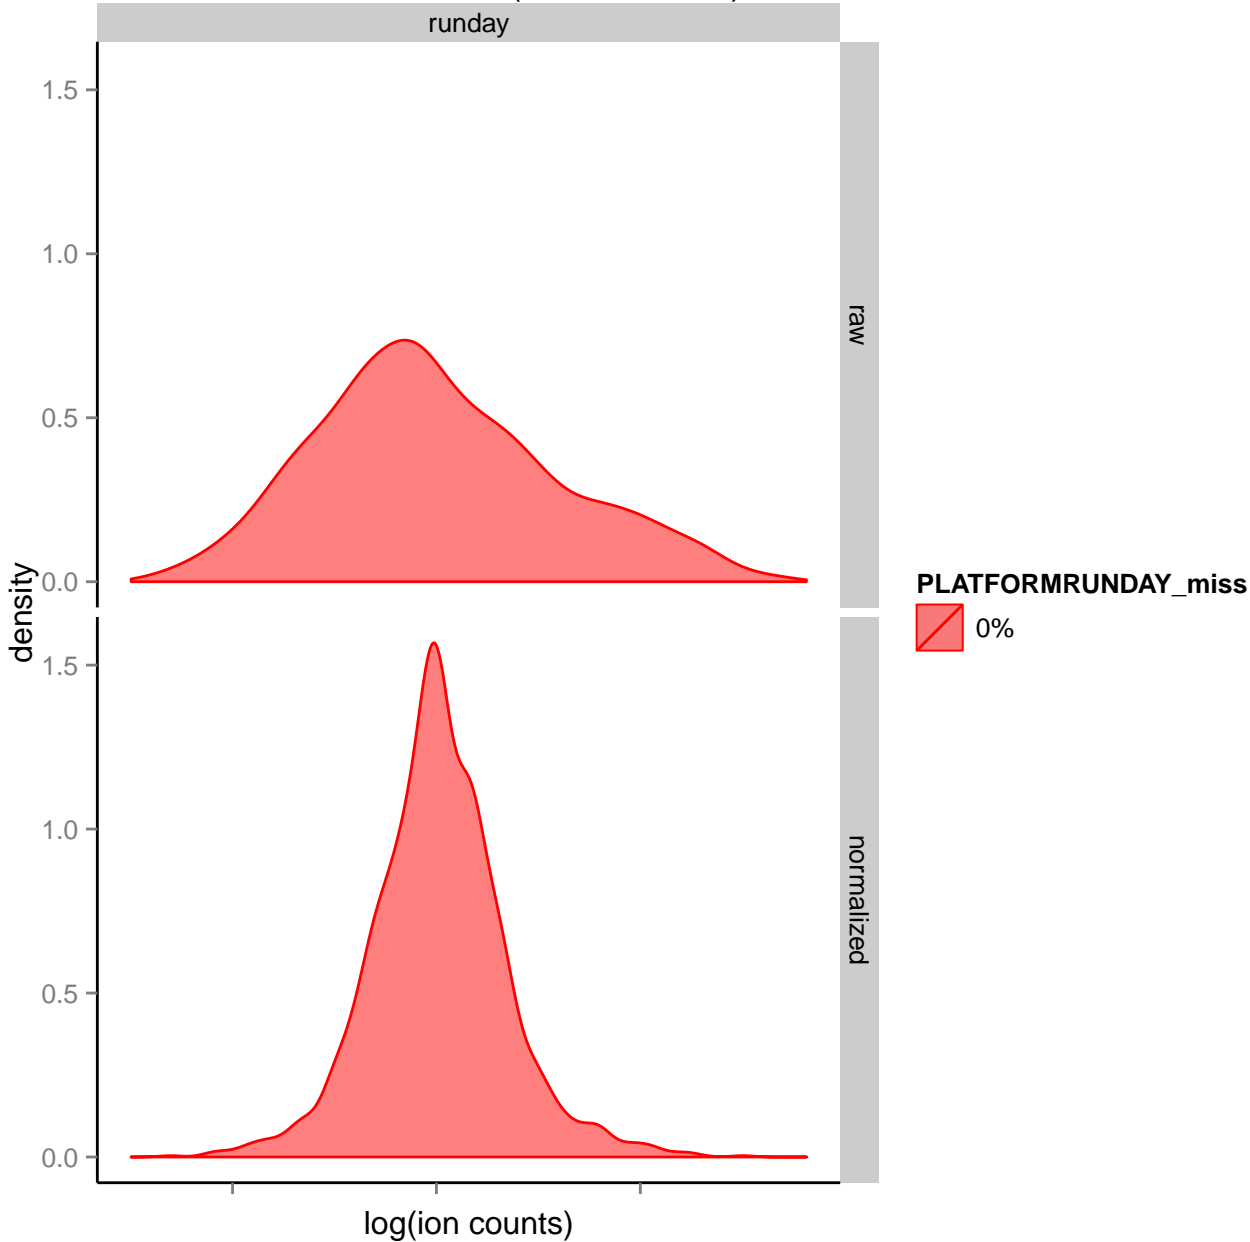

# dimethylarginine (SDMA + ADMA)

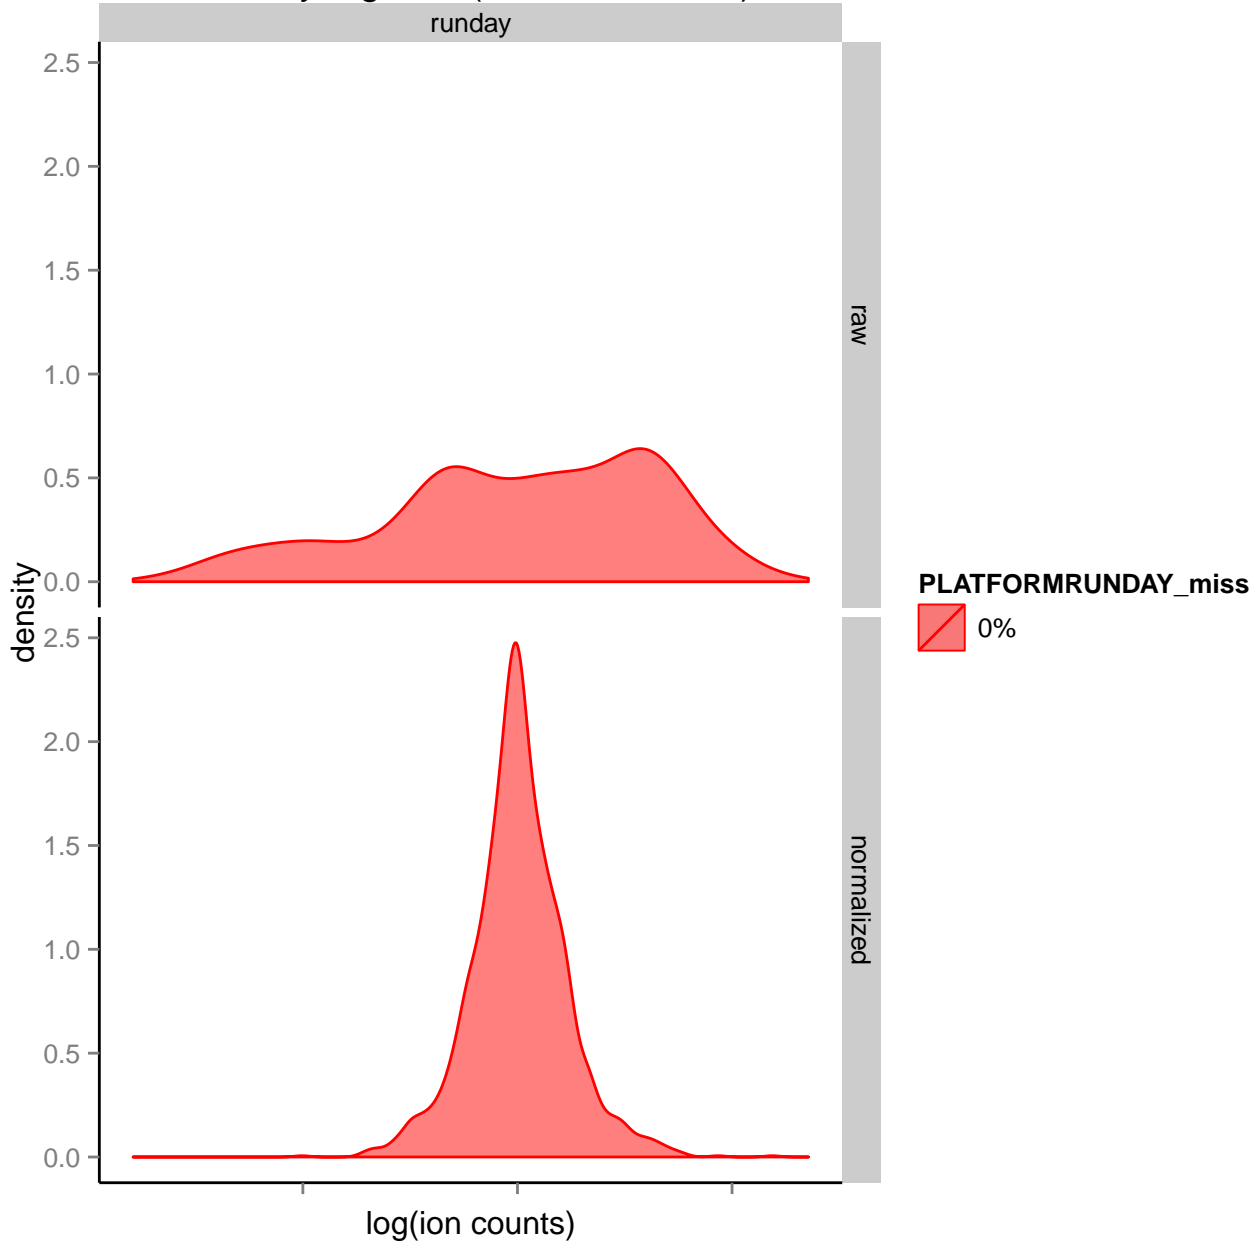

# docosahexaenoate (DHA; 22:6n3)

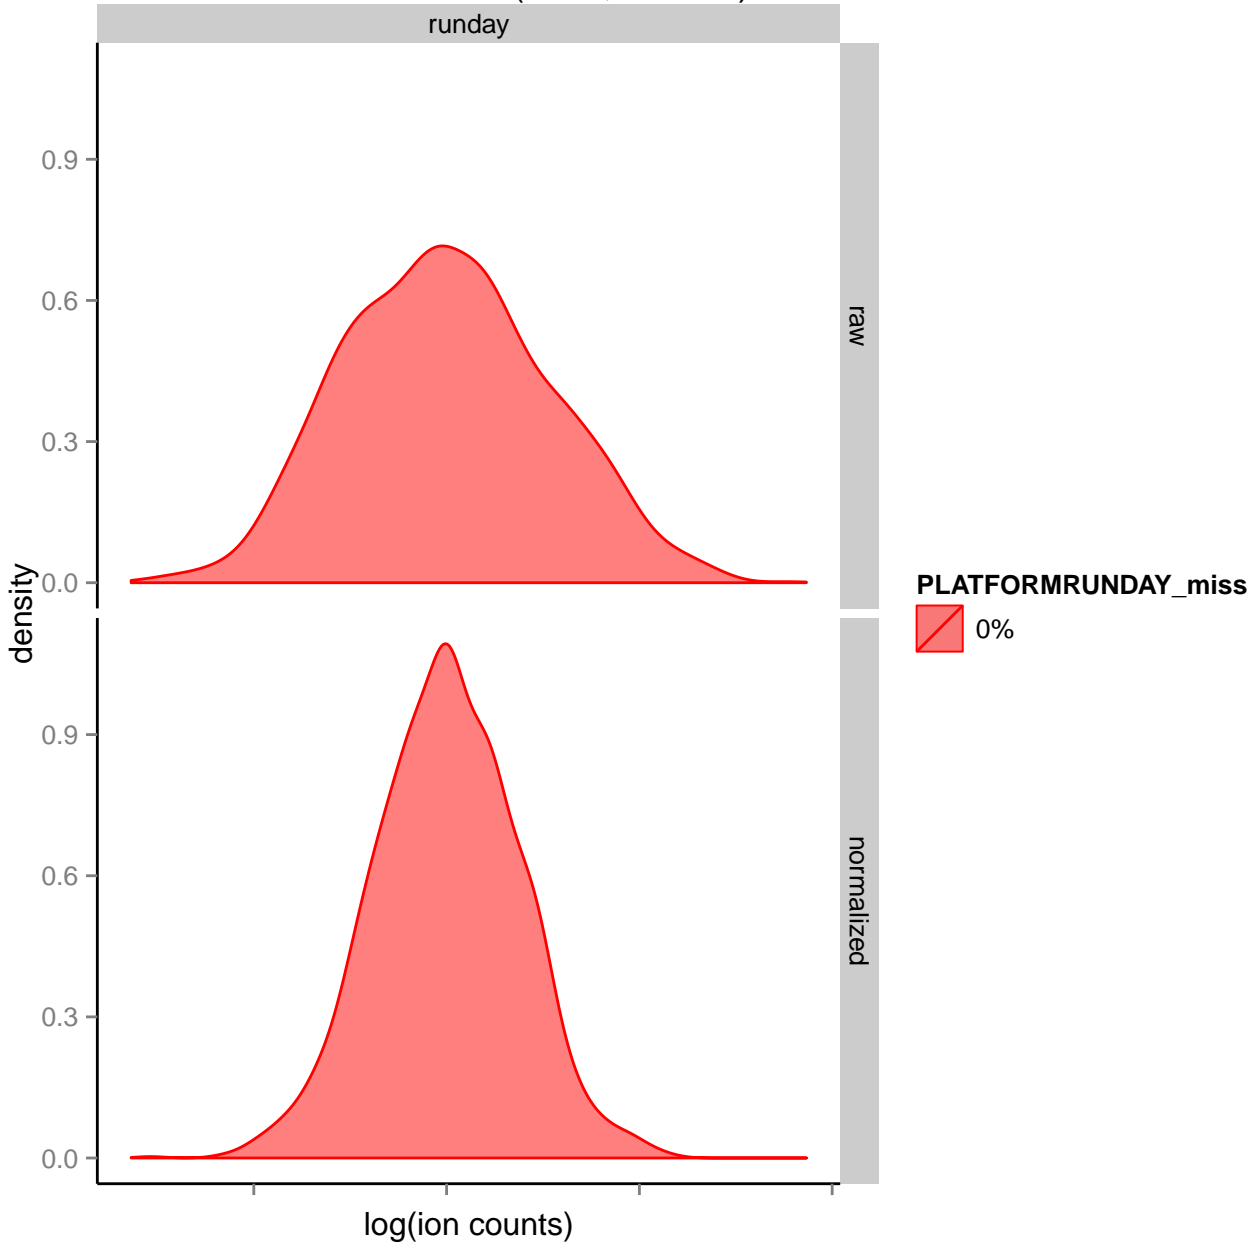

# docosapentaenoate (n3 DPA; 22:5n3)

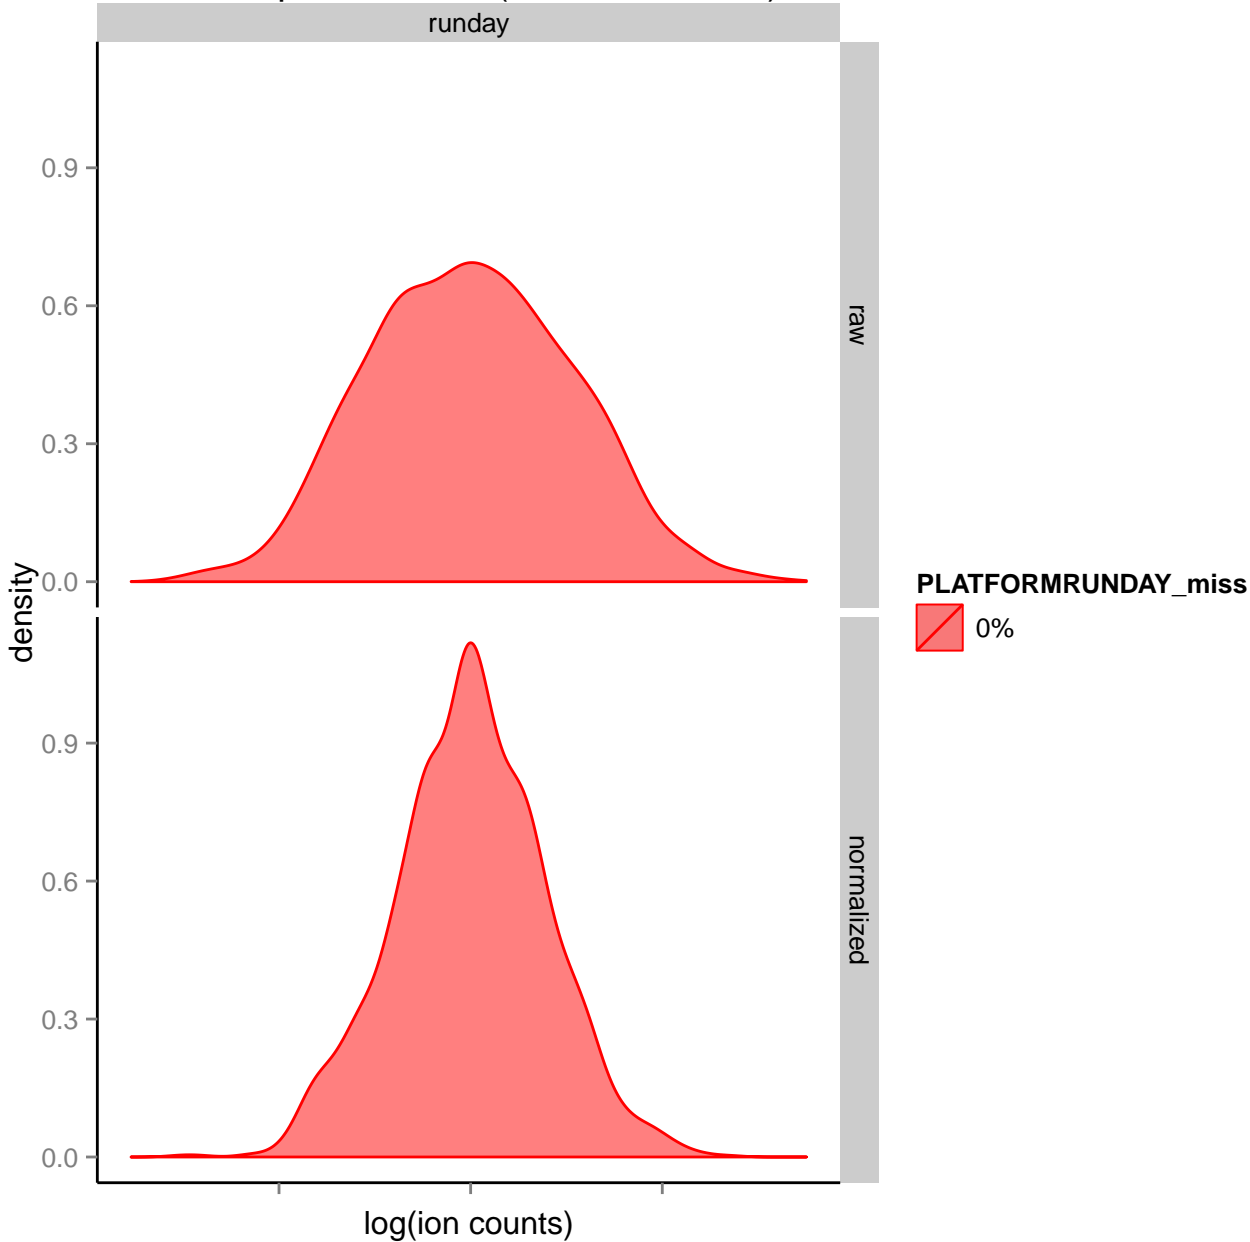



# dodecanedioate

runday

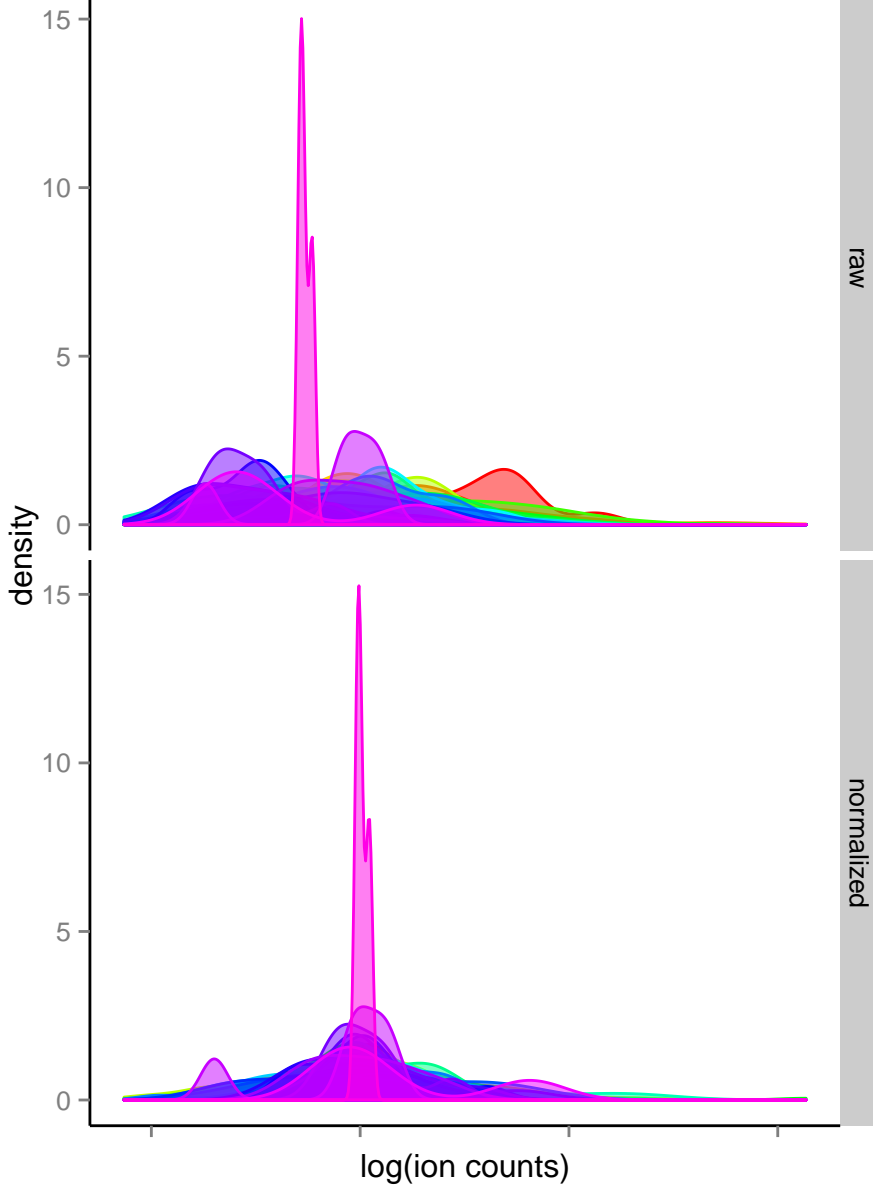

## PLATFORMRUNDAY\_miss

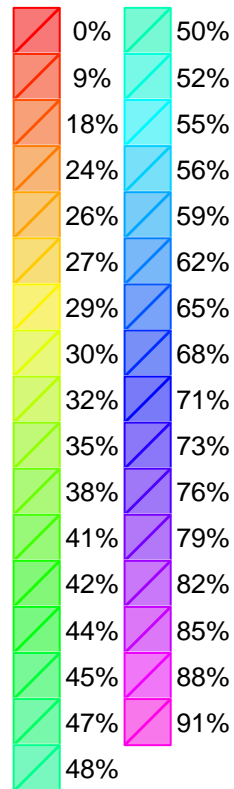

# DSGEGDFXAEGGGVR\*

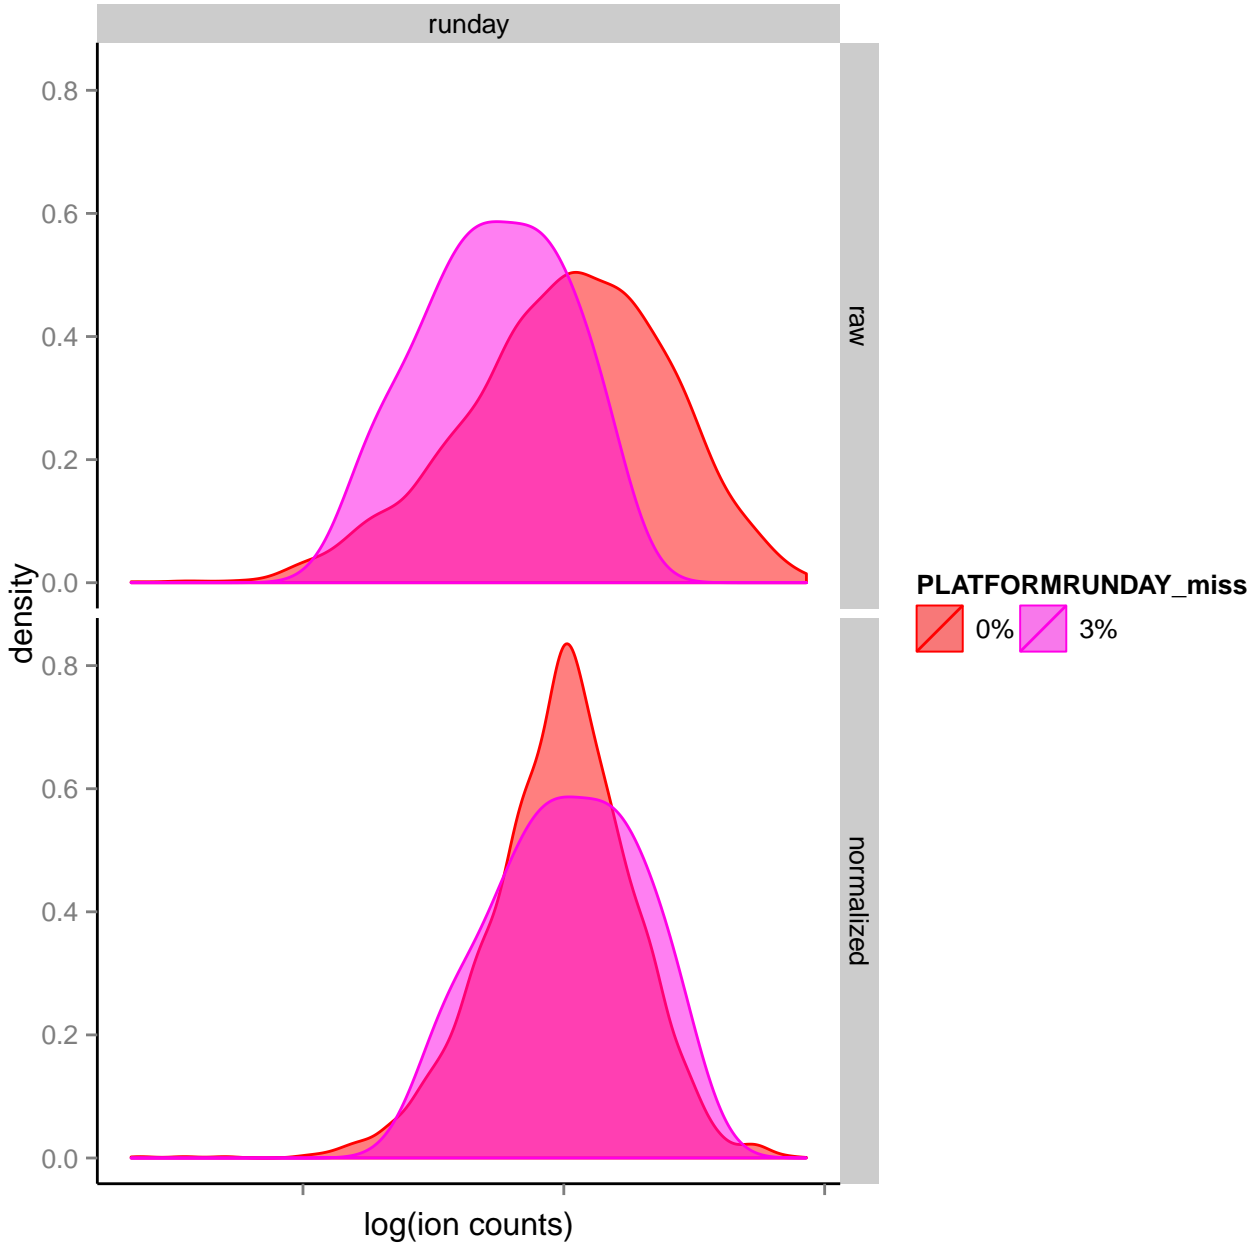

# eicosapentaenoate (EPA; 20:5n3)

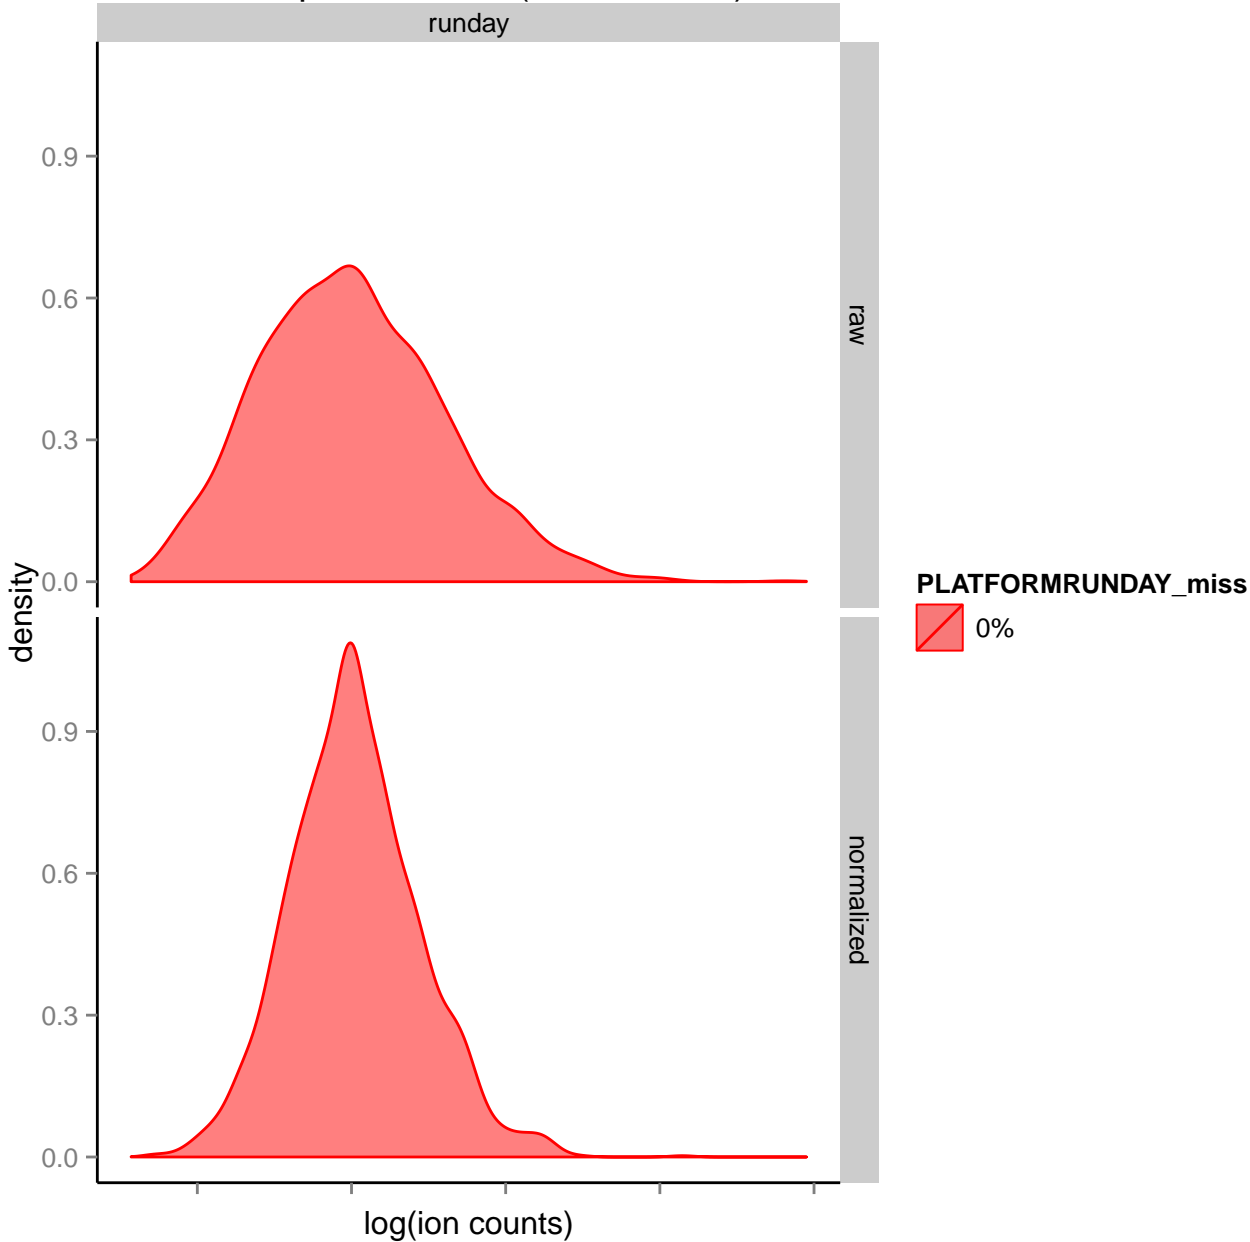

# eicosenoate (20:1n9 or 11)

runday

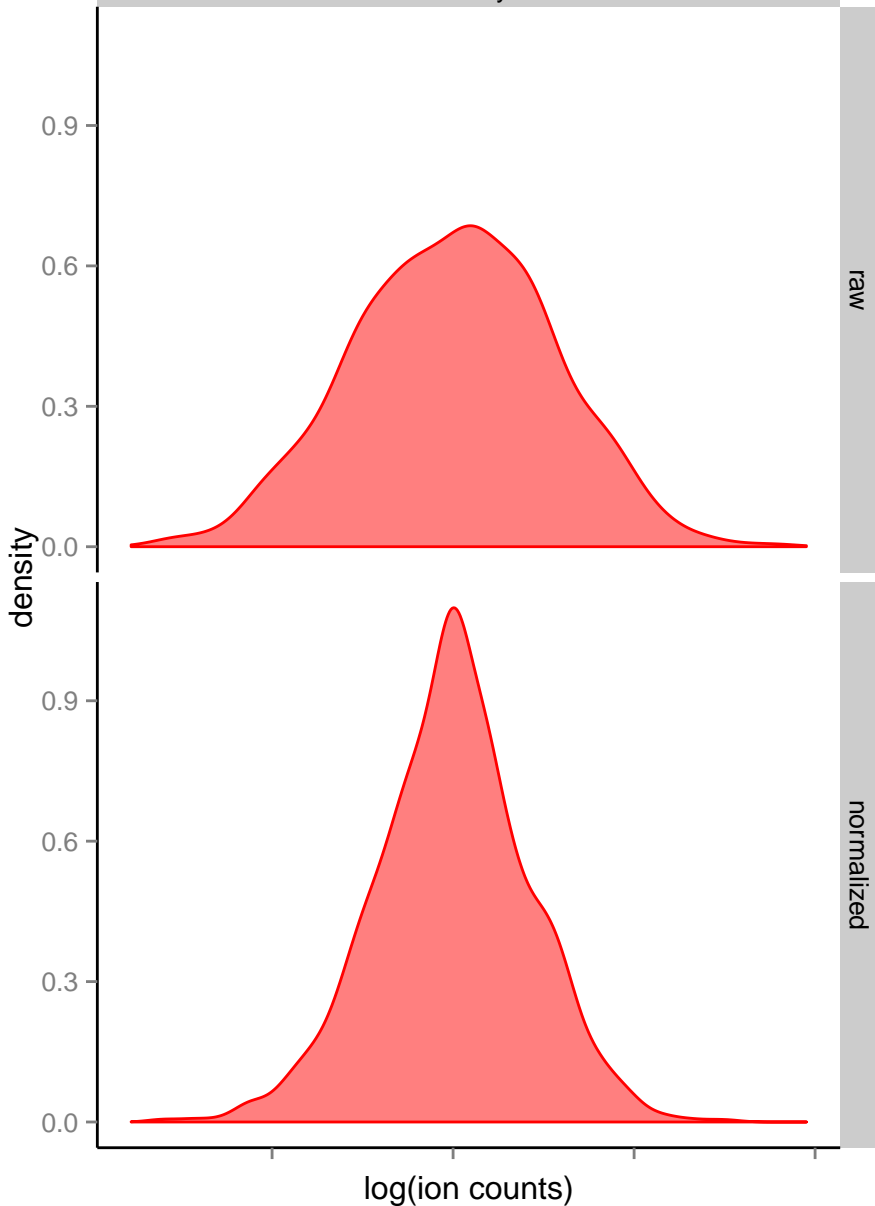

raw

normalized

**PLATFORMRUNDAY\_miss**

0%

# epiandrosterone sulfate

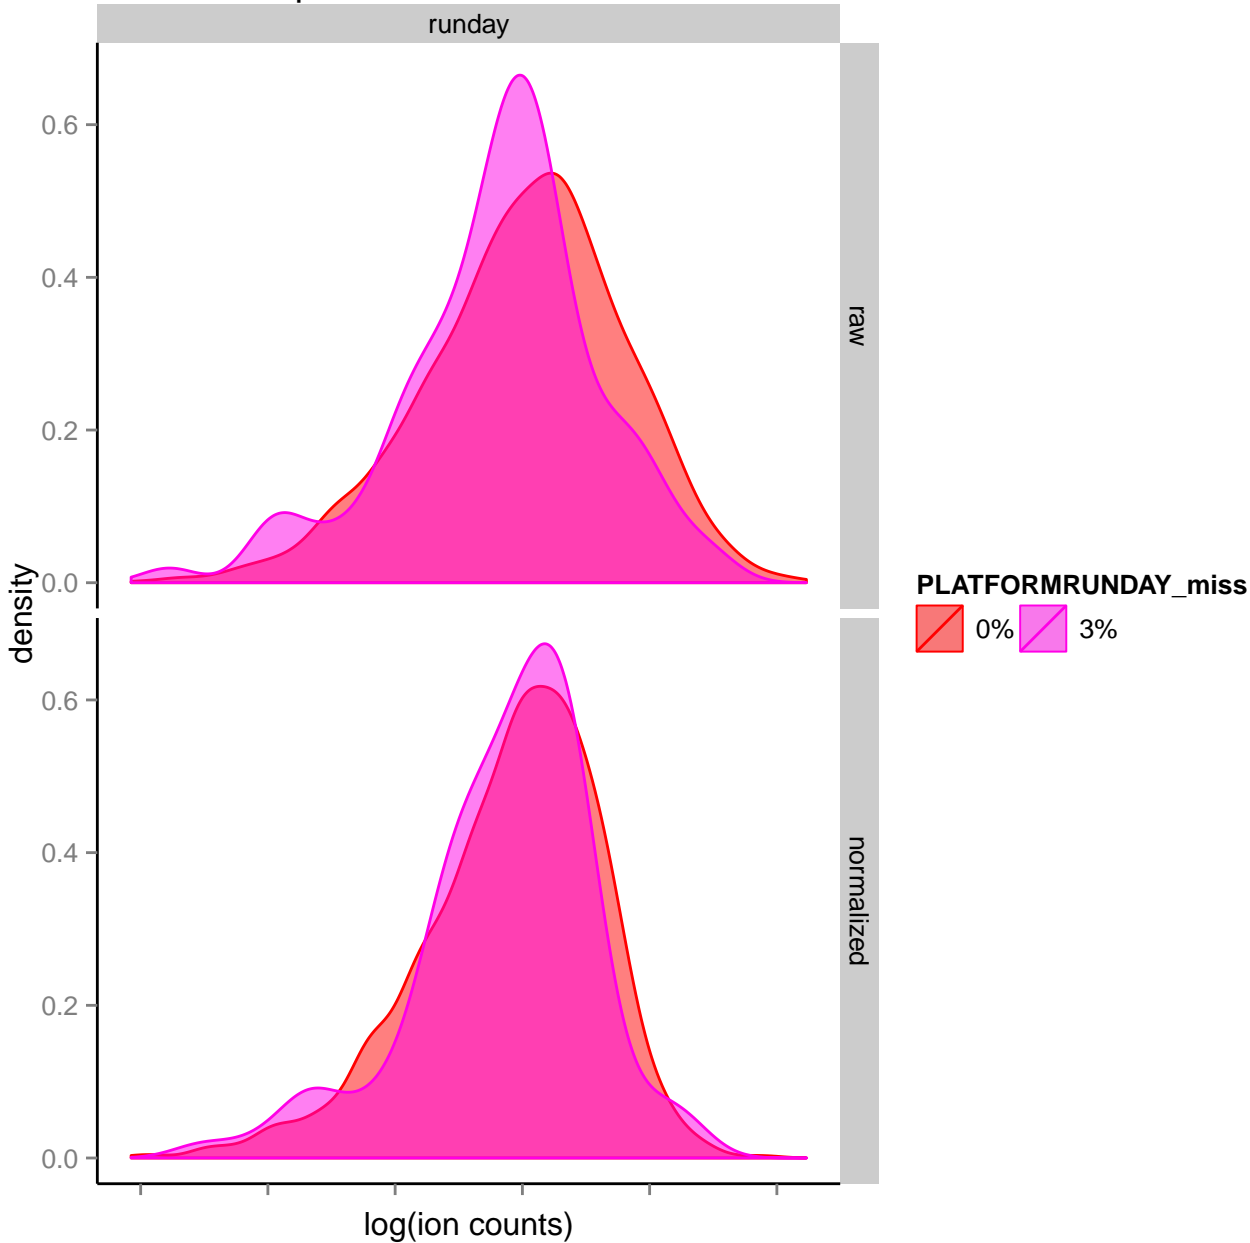

# erythritol

runday

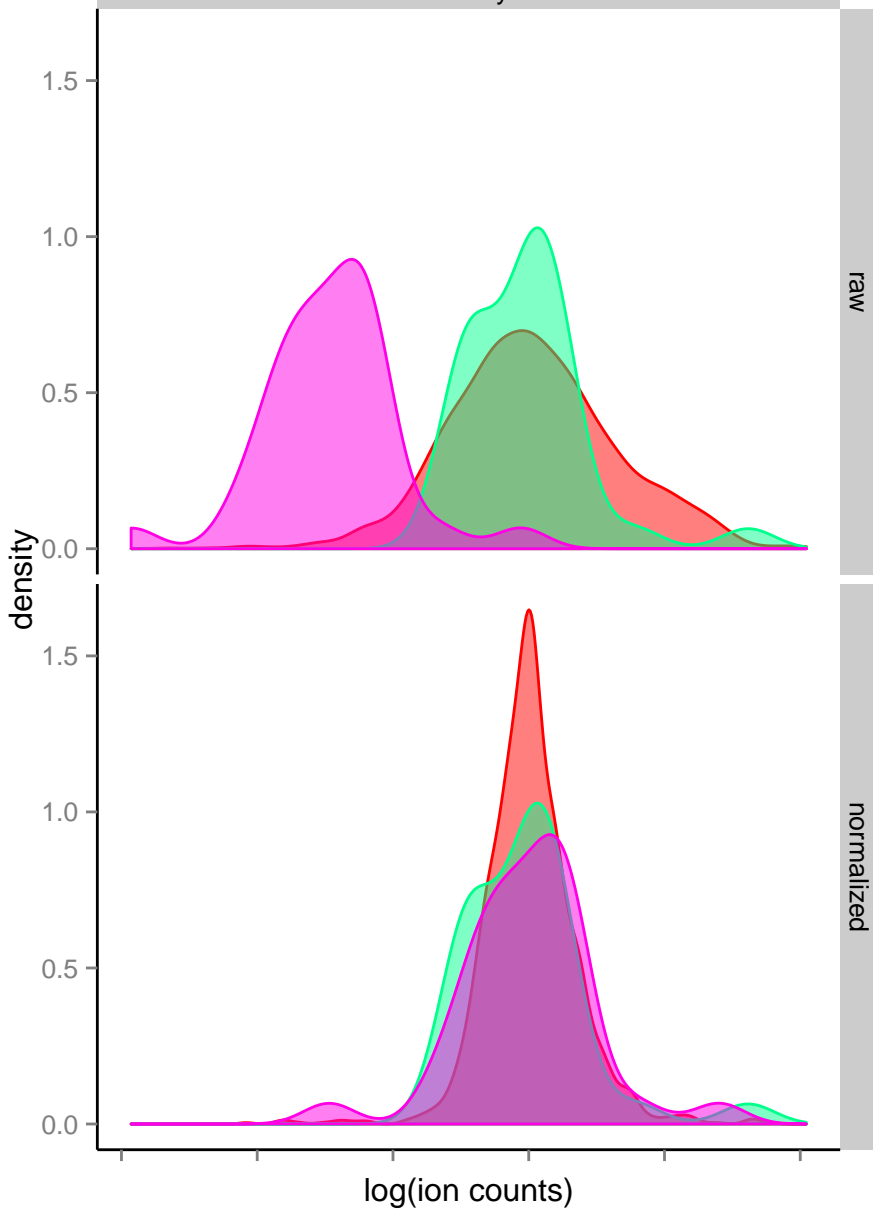

**PLATFORMRUNDAY\_miss**



# erythronate\*

runday

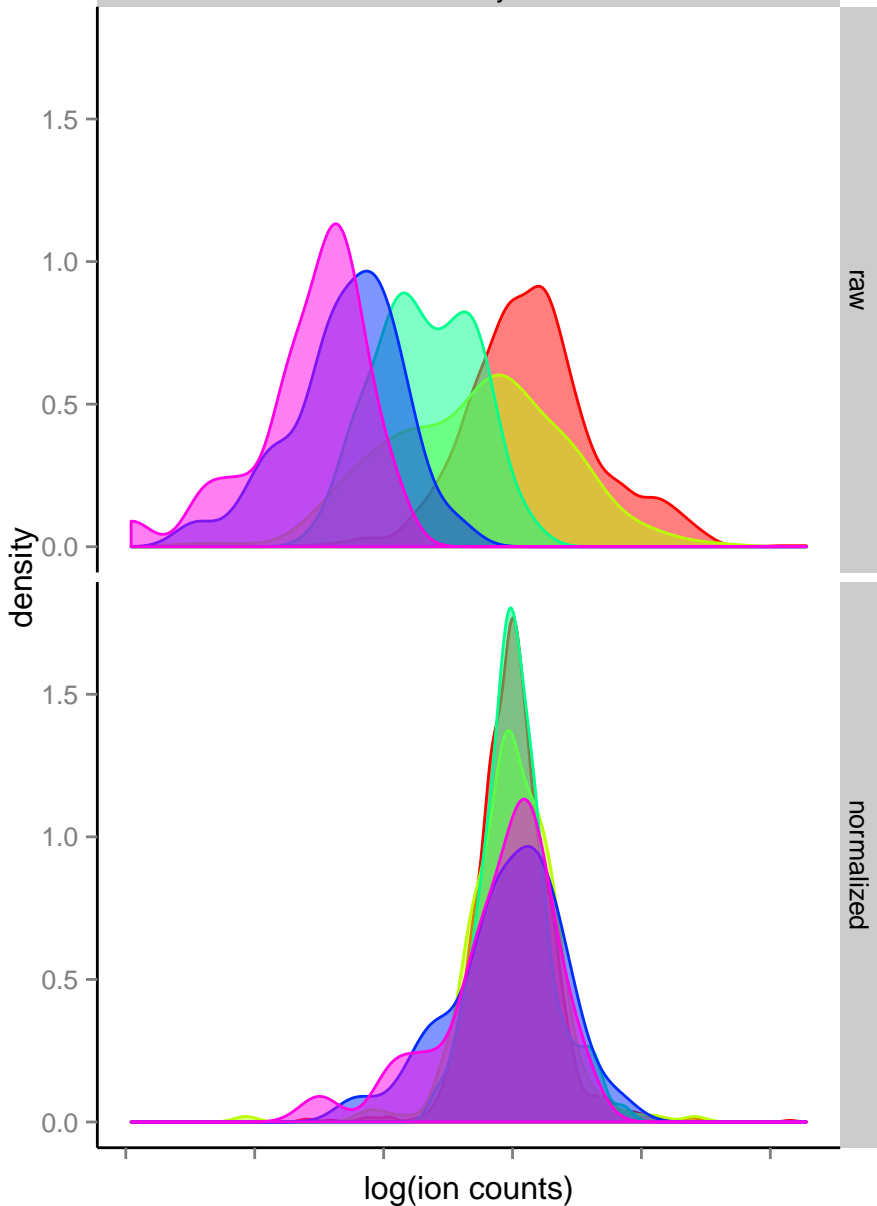

**PLATFORMRUNDAY\_miss**

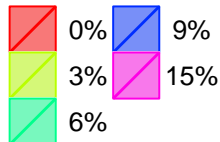

# erythrose

runday

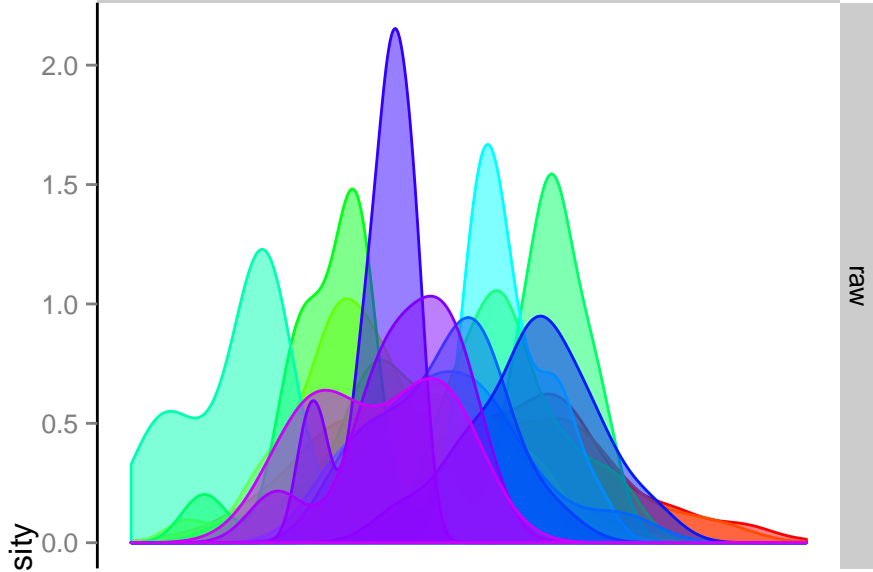

raw

**PLATFORMRUNDAY\_miss**

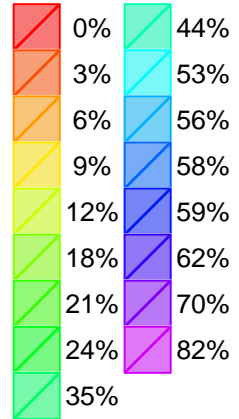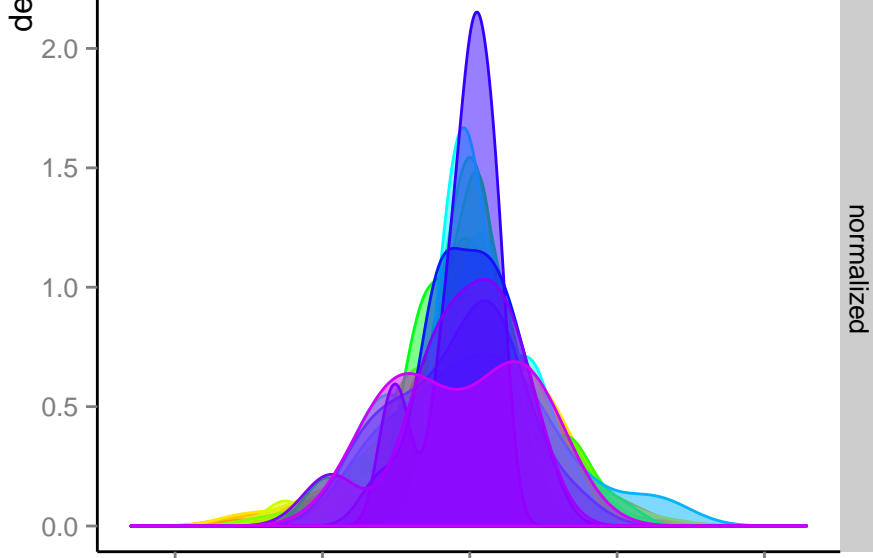

normalized

log(ion counts)



# estrone 3-sulfate

runday

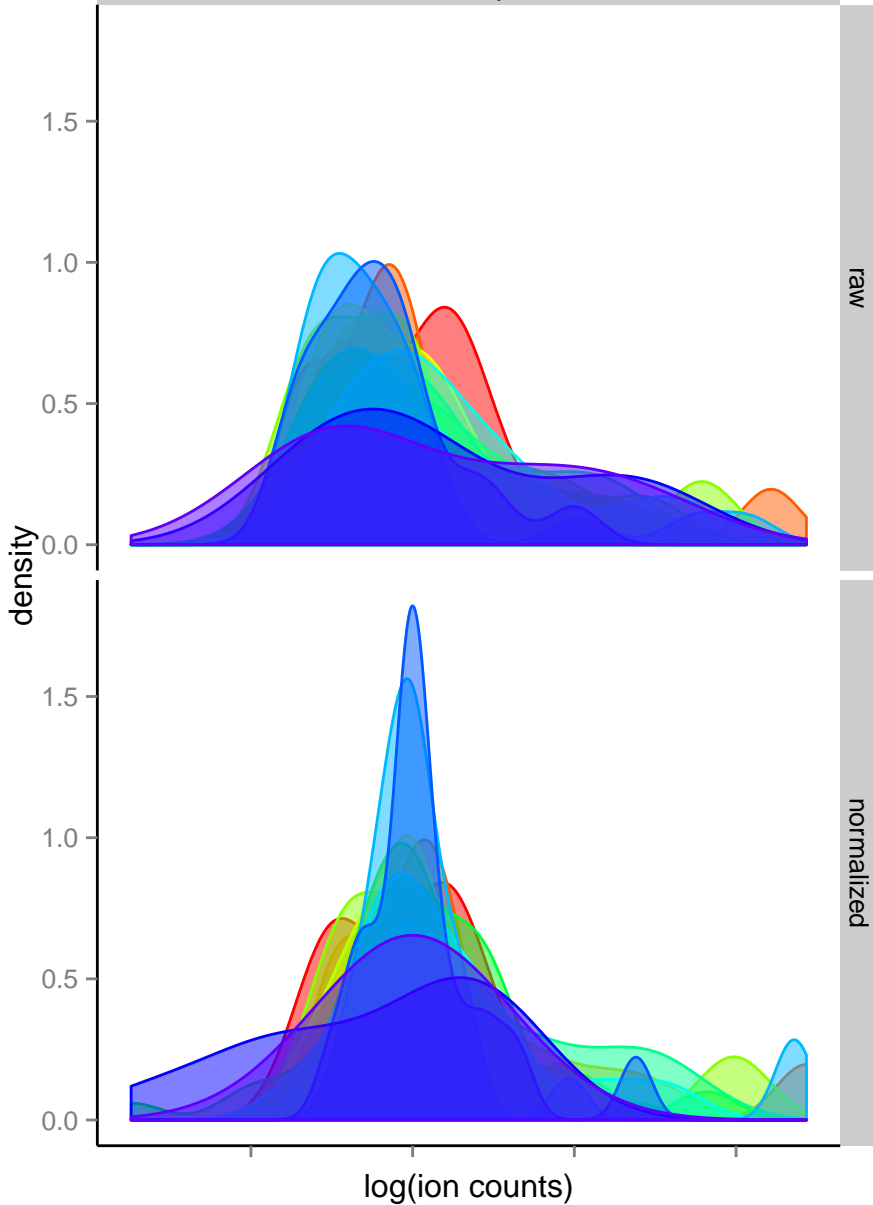

## PLATFORMRUNDAY\_miss

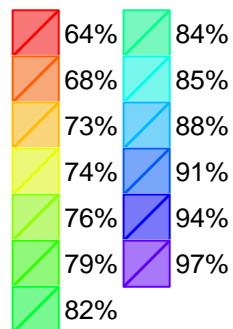

# fructose

runday

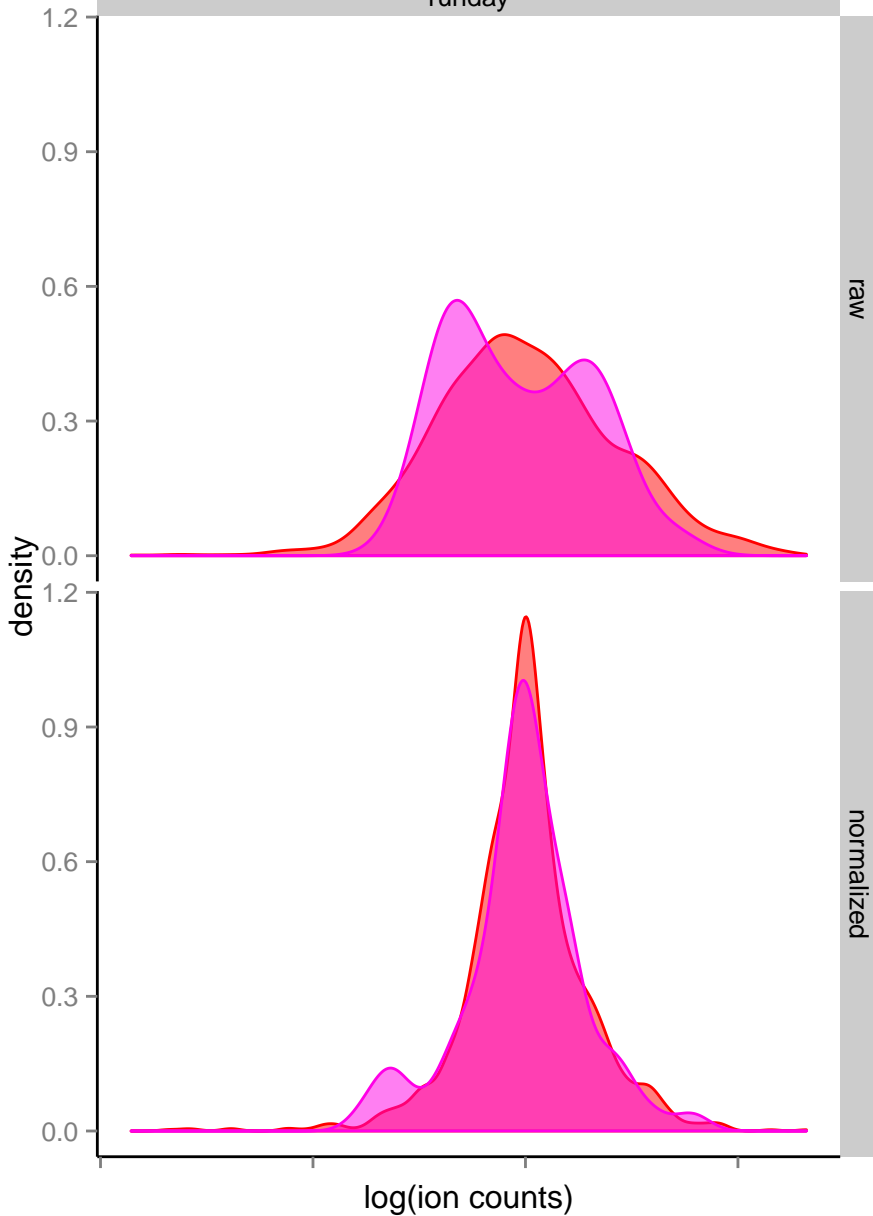

raw

normalized

**PLATFORMRUNDAY\_miss**



0%



3%

log(ion counts)

# gamma-glutamylglutamate

runday

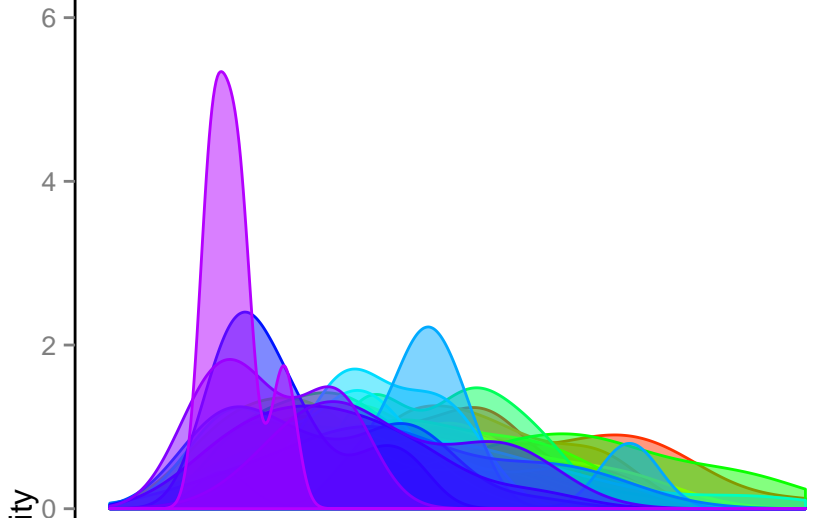

raw

## PLATFORMRUNDAY\_miss

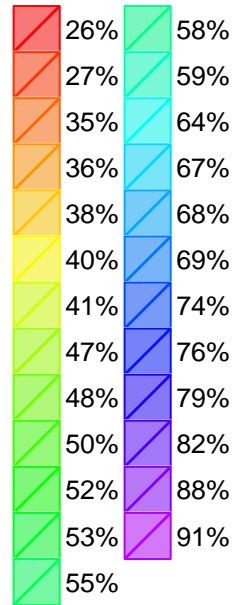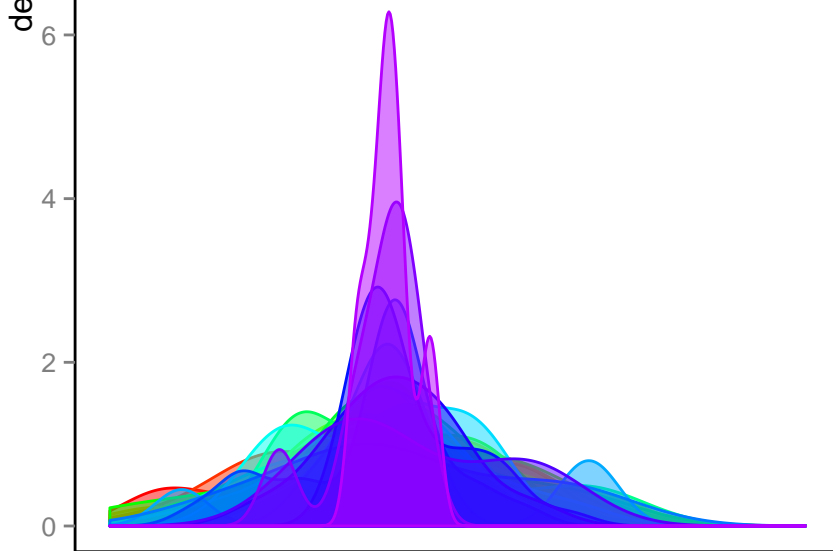

normalized

log(ion counts)

# gamma-glutamylglutamine

runday

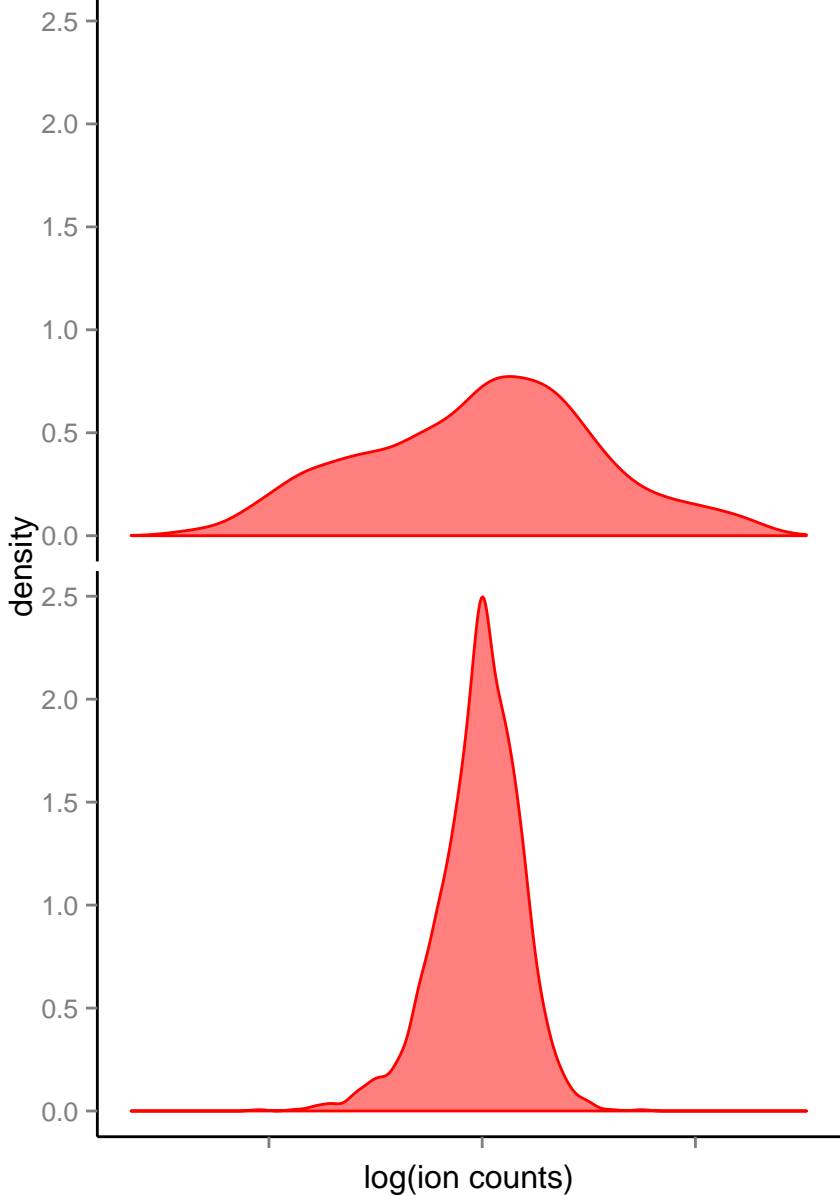

PLATFORMRUNDAY\_miss

0%

# gamma-glutamylisoleucine\*

runday

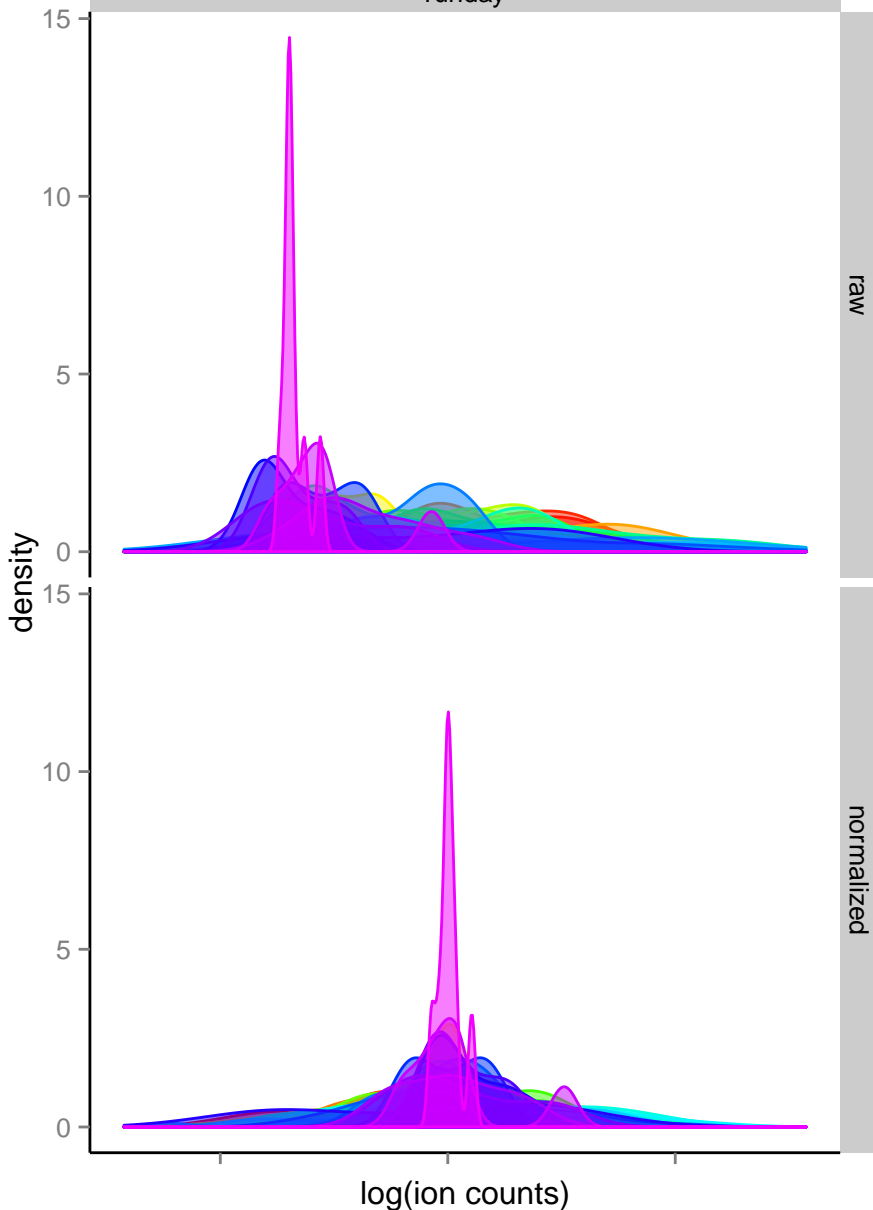

## PLATFORMRUNDAY\_miss

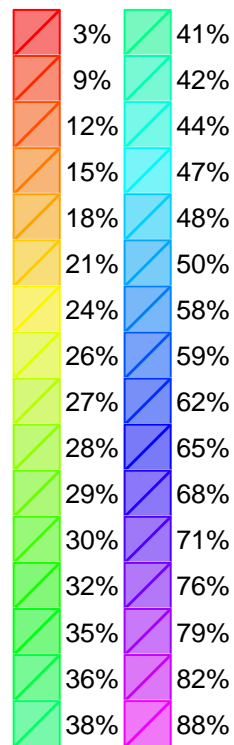

# gamma-glutamylleucine

runday

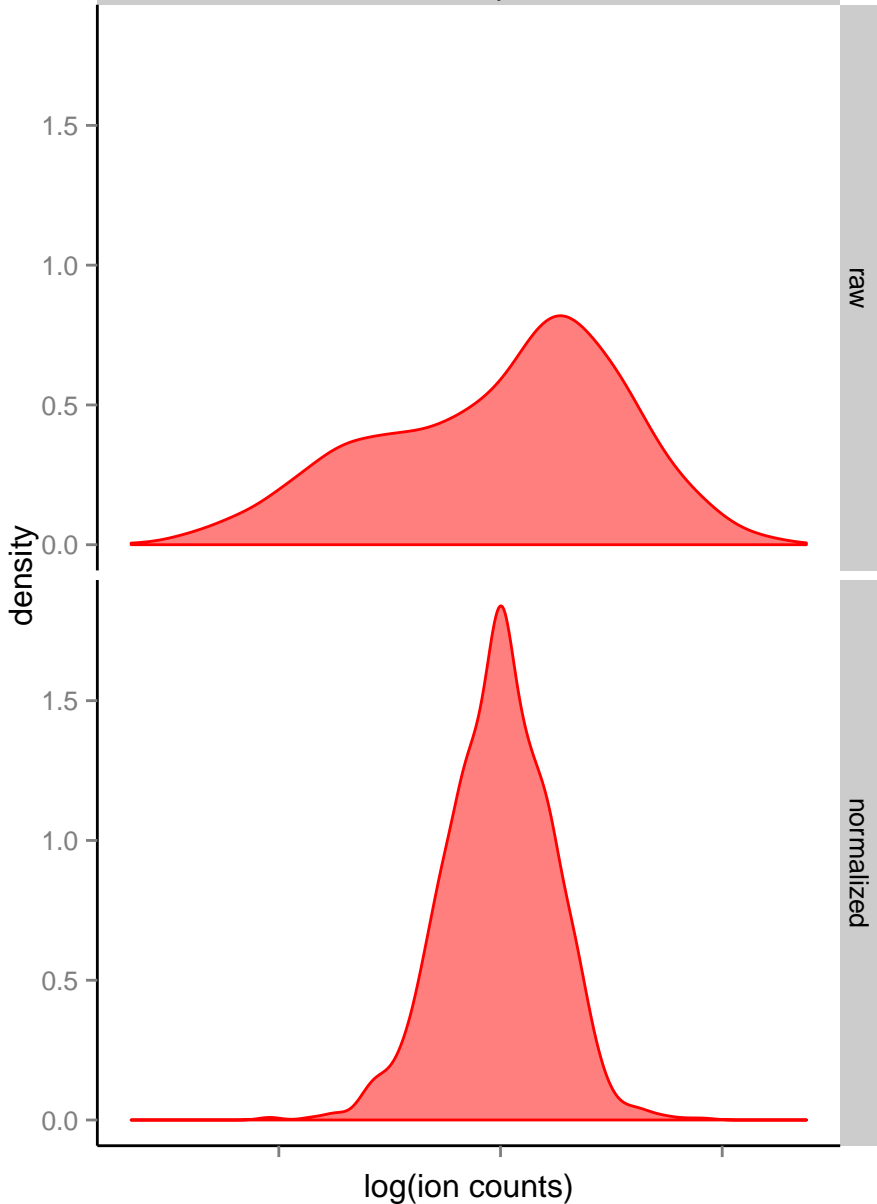

**PLATFORMRUNDAY\_miss**

0%

# gamma-glutamylmethionine\*

runday

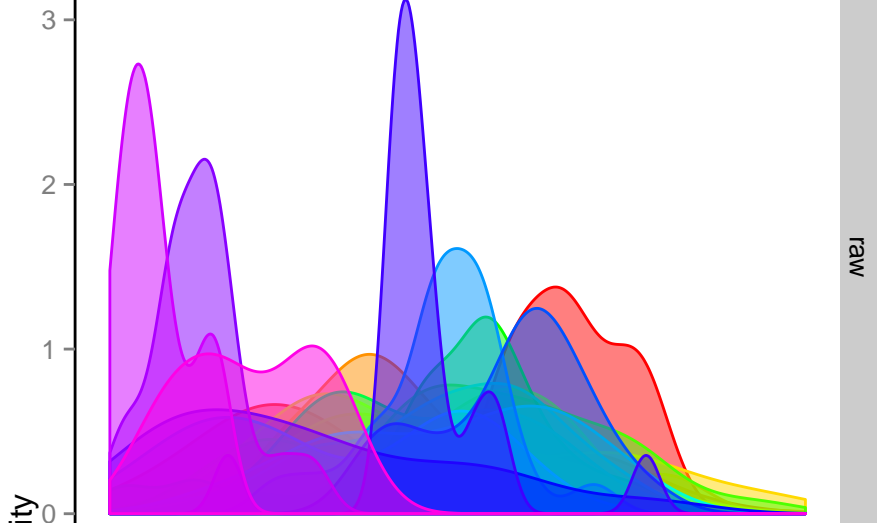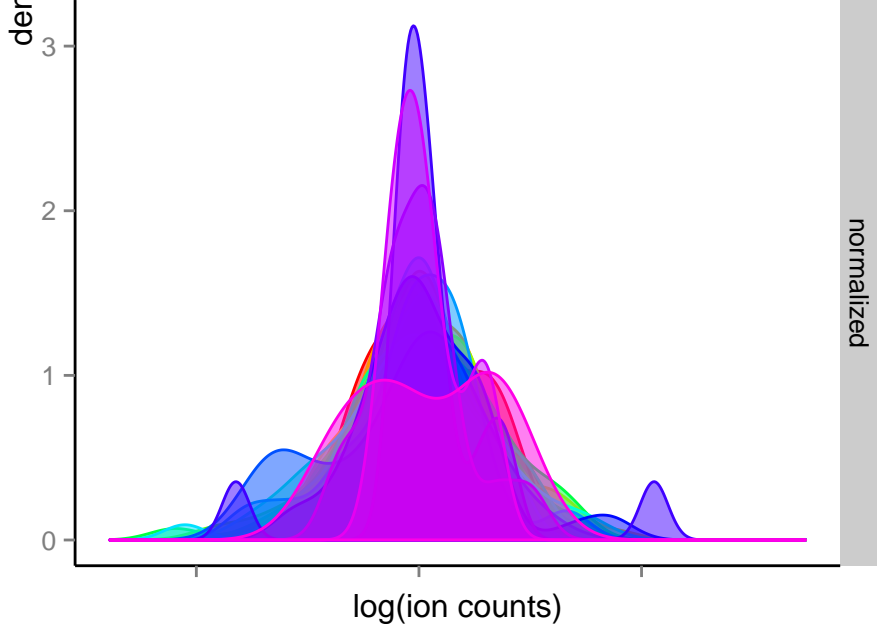

**PLATFORMRUNDAY\_miss**

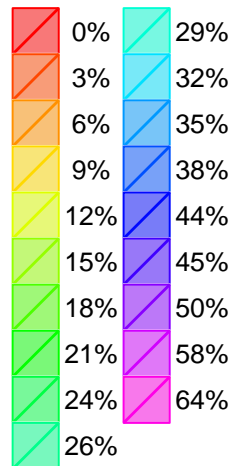

# gamma-glutamylphenylalanine

runday

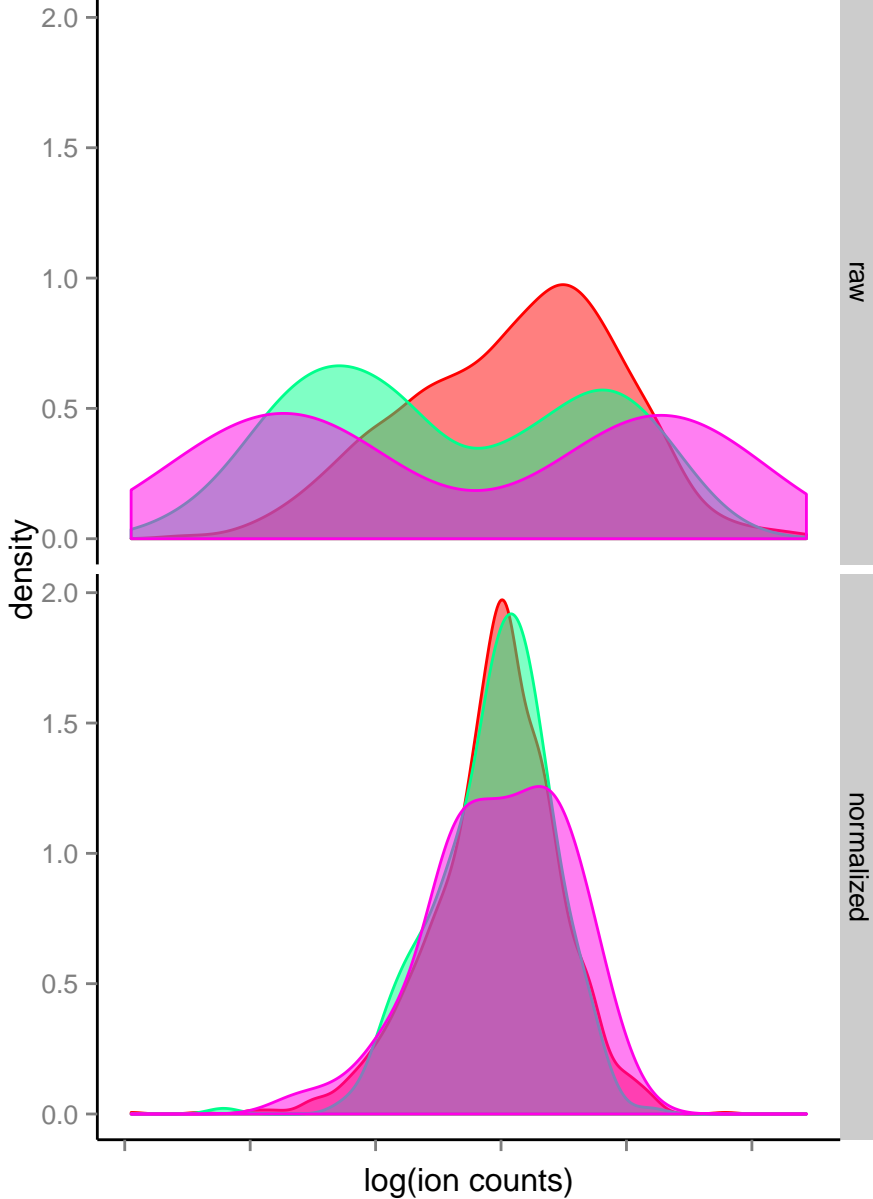

**PLATFORMRUNDAY\_miss**

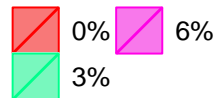



# gamma-glutamylthreonine\*

runday

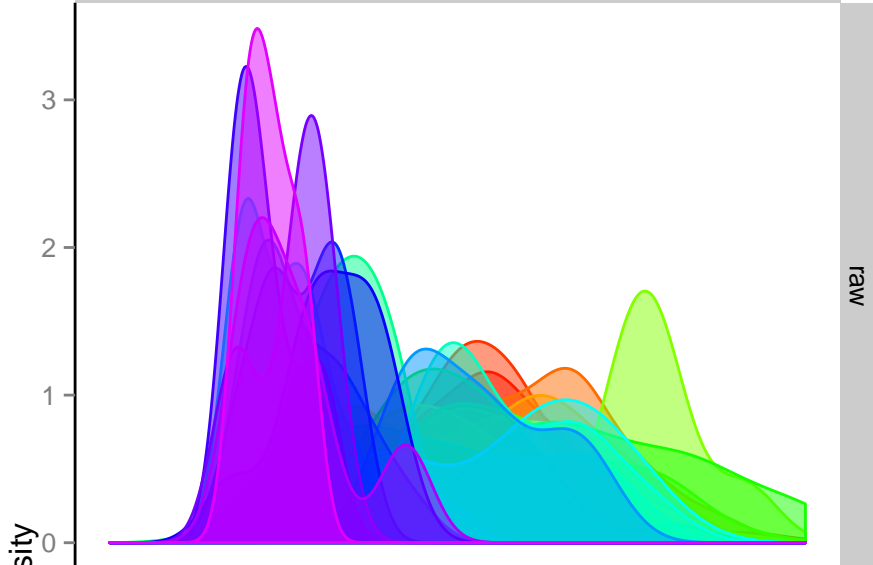

raw

PLATFORMRUNDAY\_miss

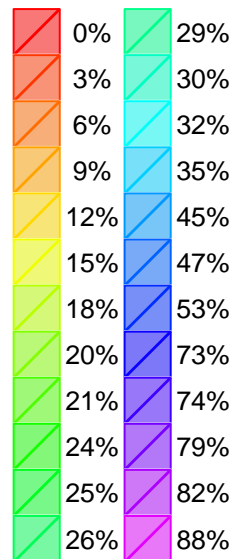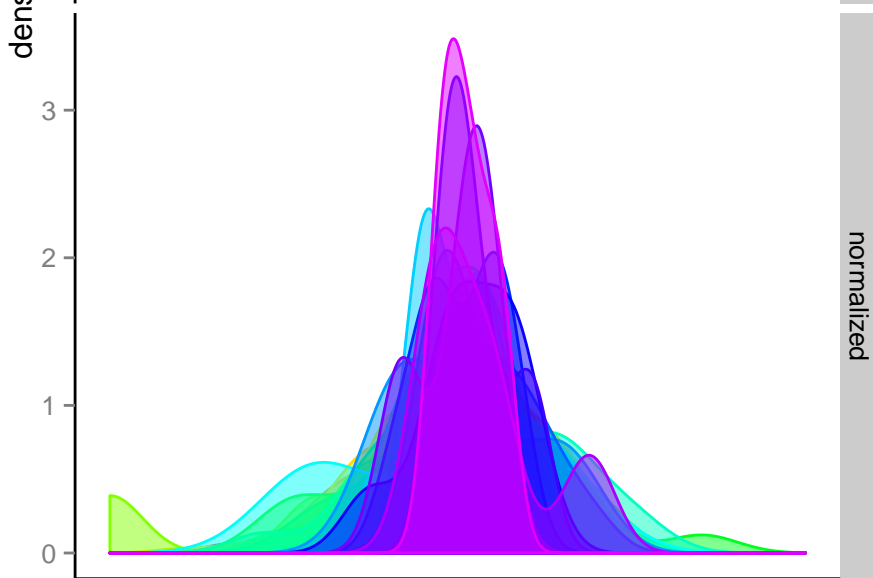

normalized

log(ion counts)

# gamma-glutamyltyrosine

runday

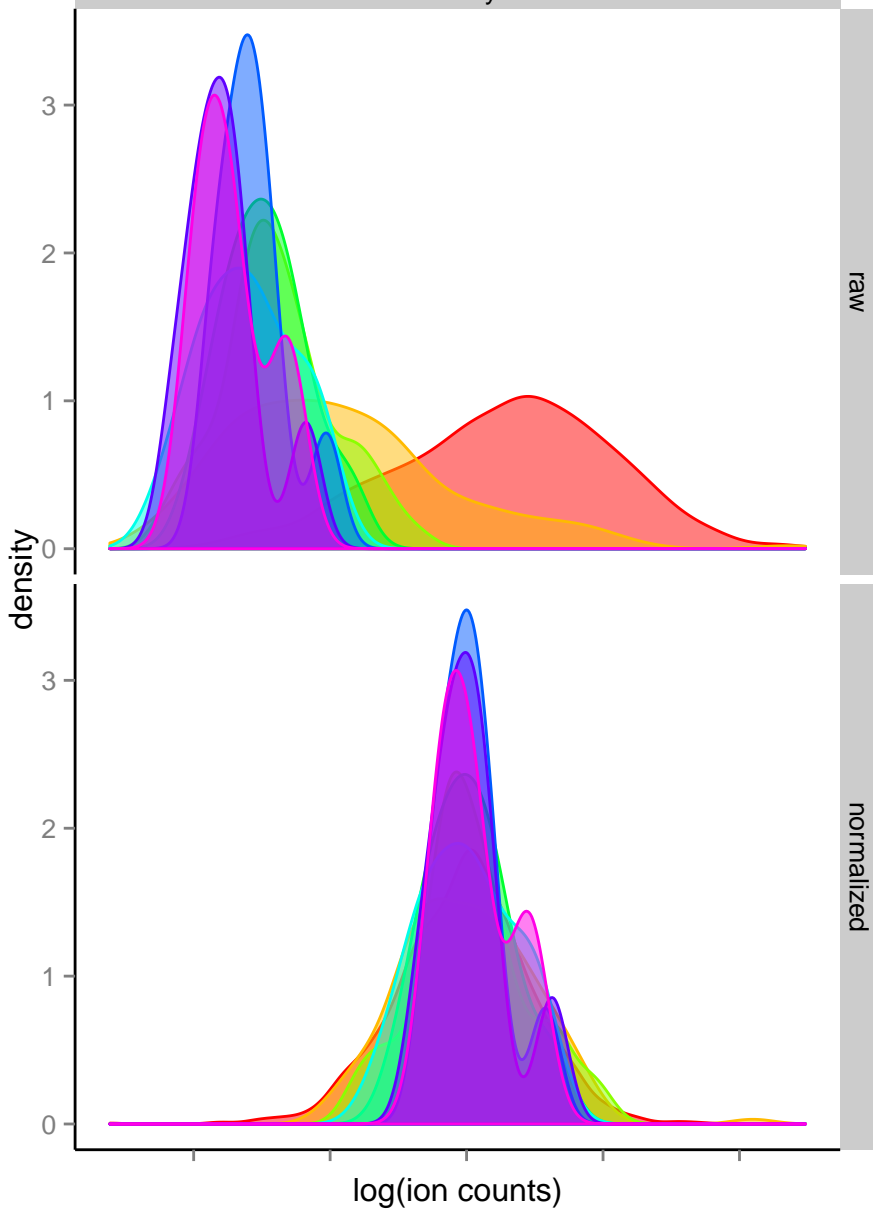

**PLATFORMRUNDAY\_miss**

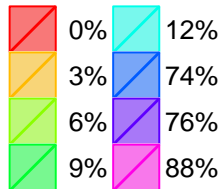

# gamma-glutamylvaline

runday

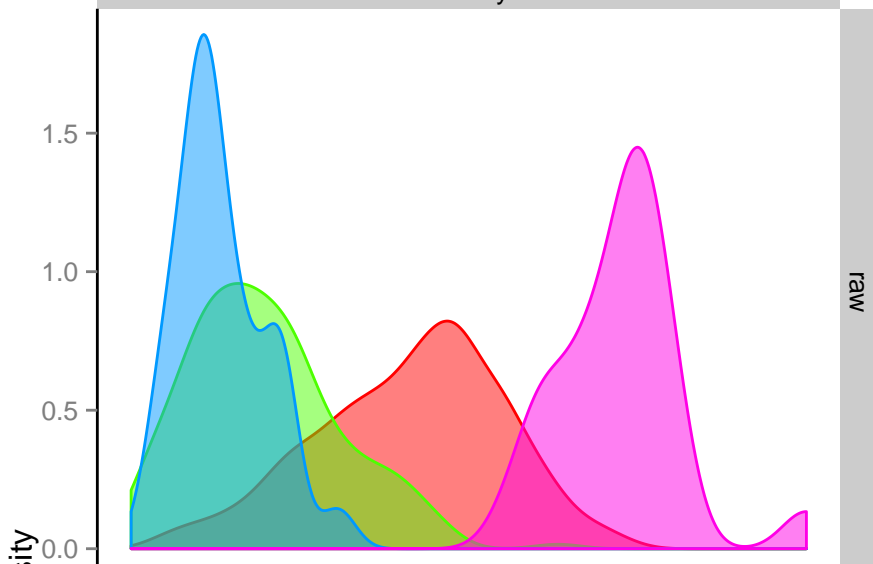

raw

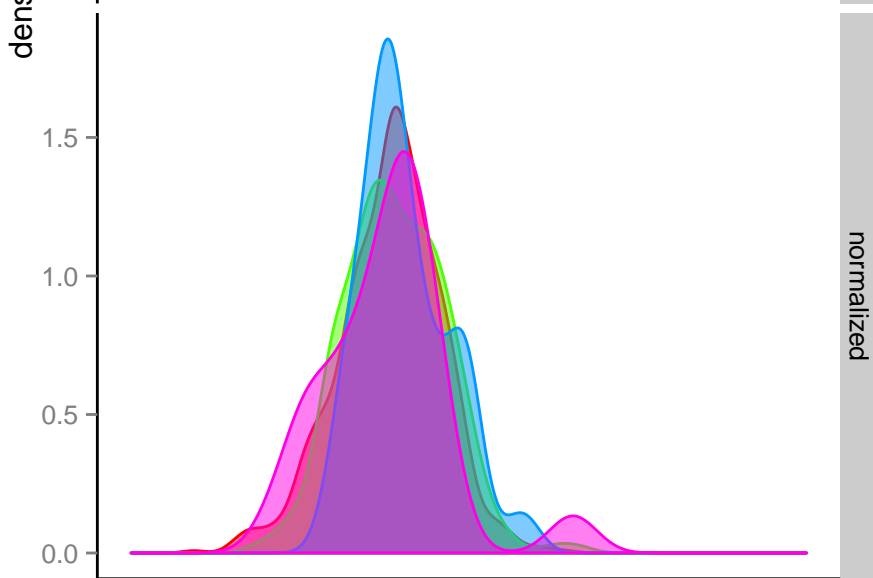

normalized

**PLATFORMRUNDAY\_miss**

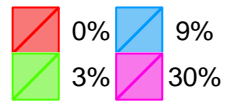

log(ion counts)

# gamma-tocopherol

runday

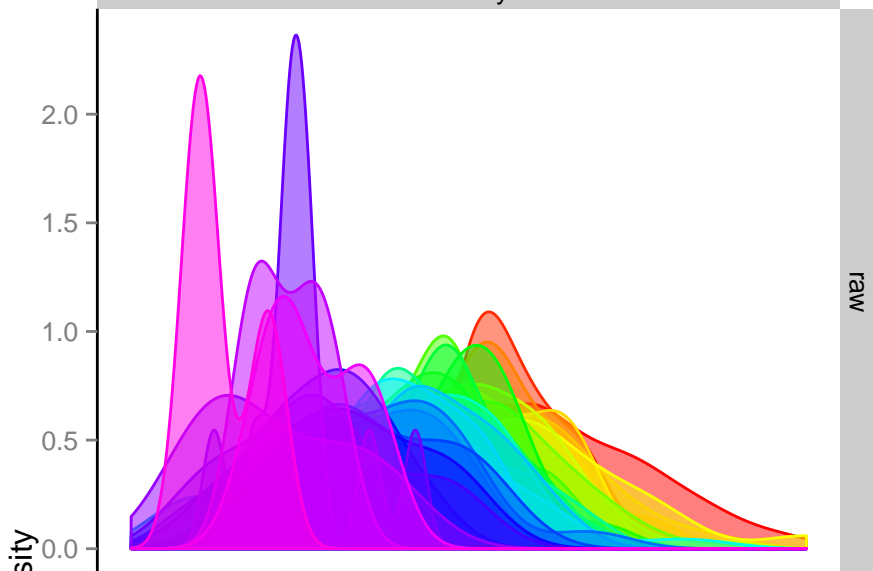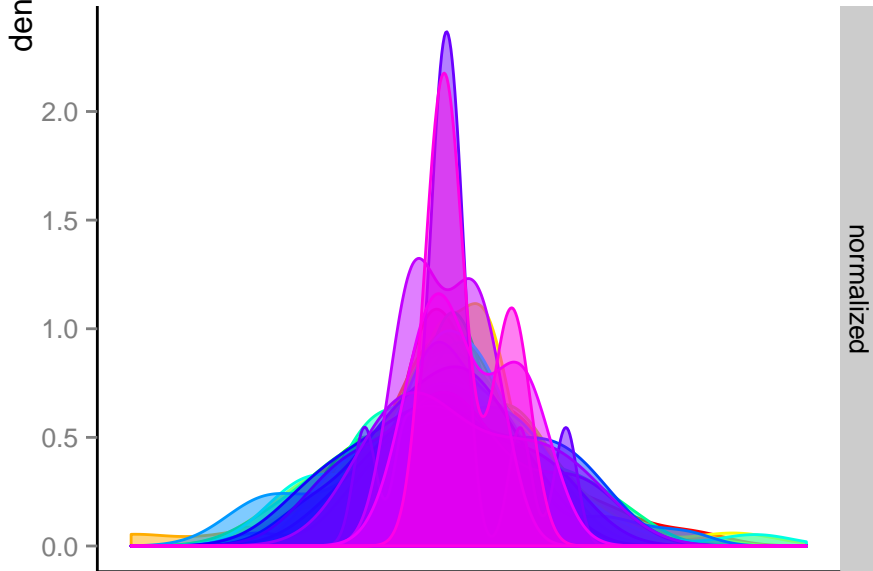

log(ion counts)

## PLATFORMRUNDAY\_miss

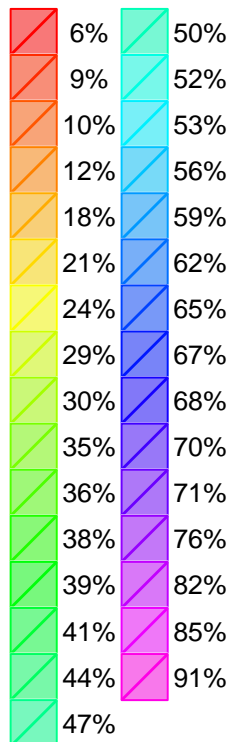

# glucose

runday

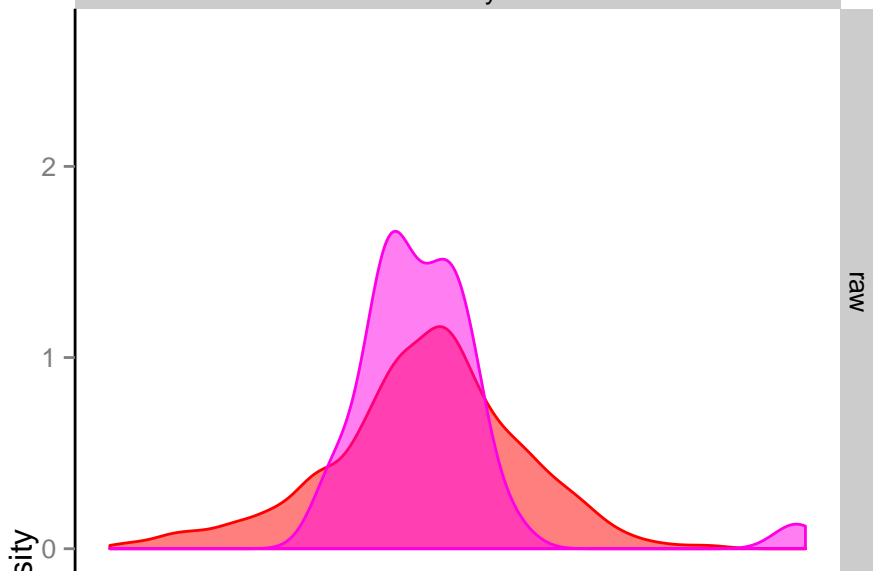

raw

**PLATFORMRUNDAY\_miss**



0%



3%

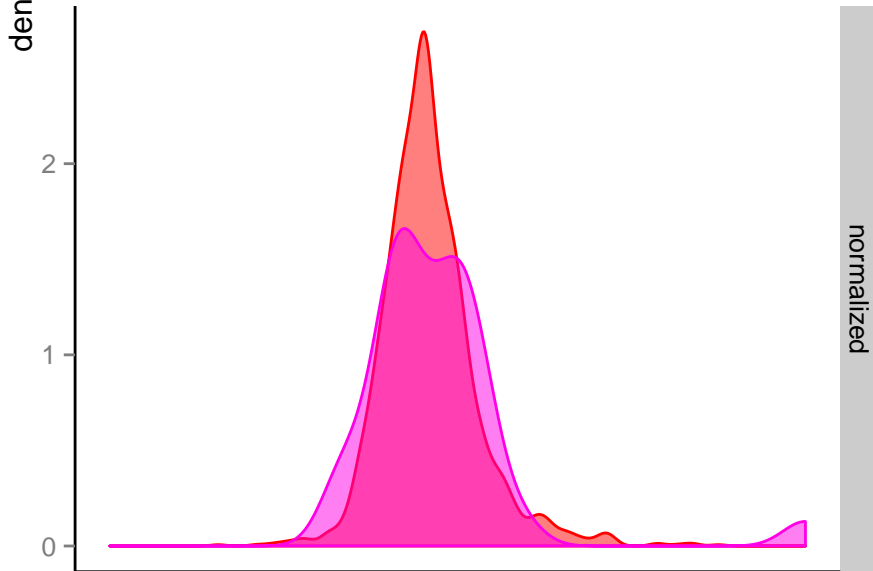

normalized

log(ion counts)

# glutamate

runday

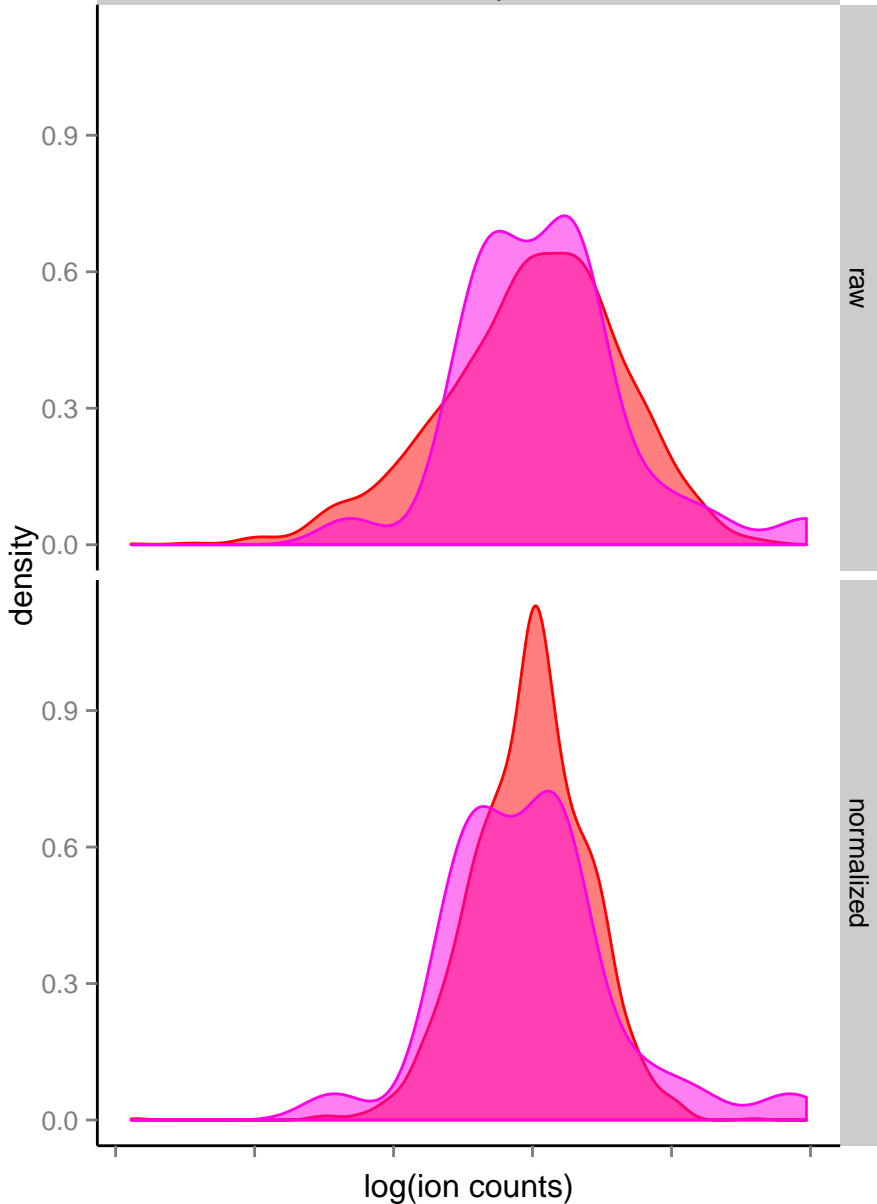

**PLATFORMRUNDAY\_miss**



0%

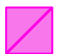

3%

raw

normalized

log(ion counts)

# glutamine

runday

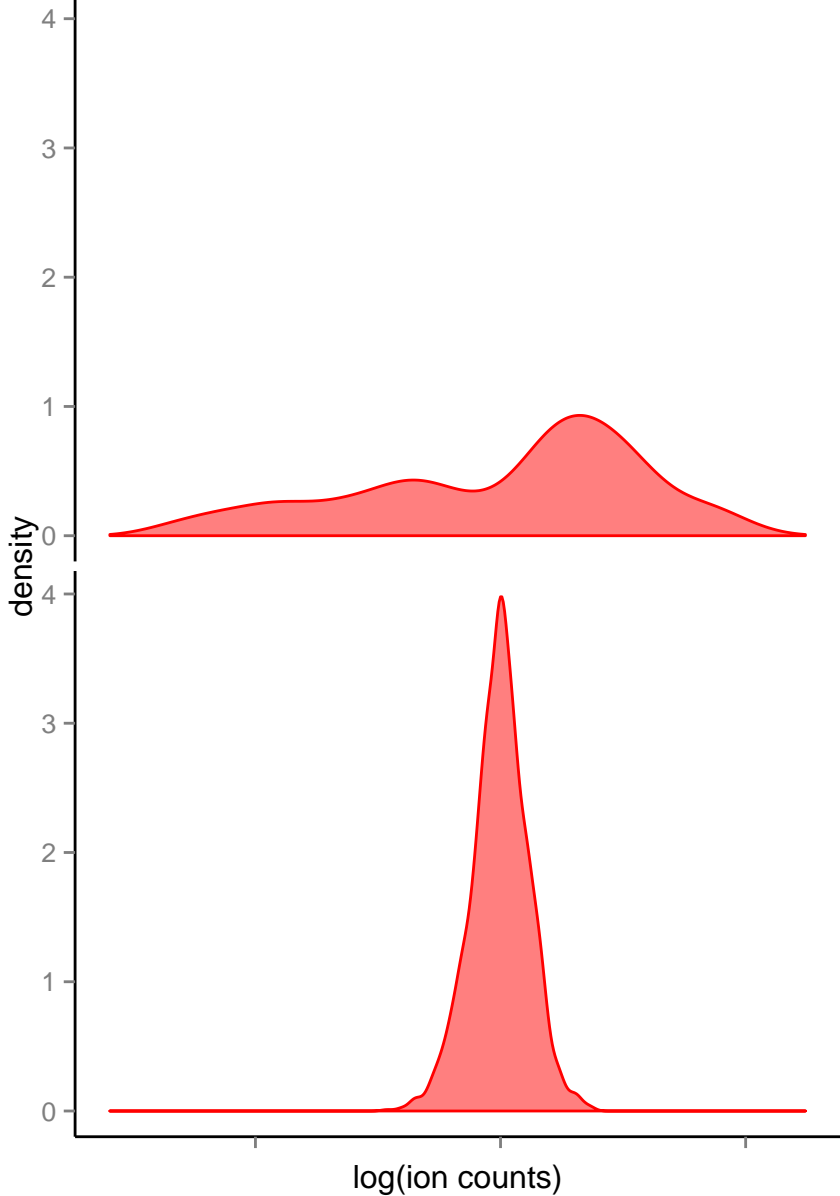

raw

normalized

**PLATFORMRUNDAY\_miss**

0%

# glutaroylcarnitine

runday

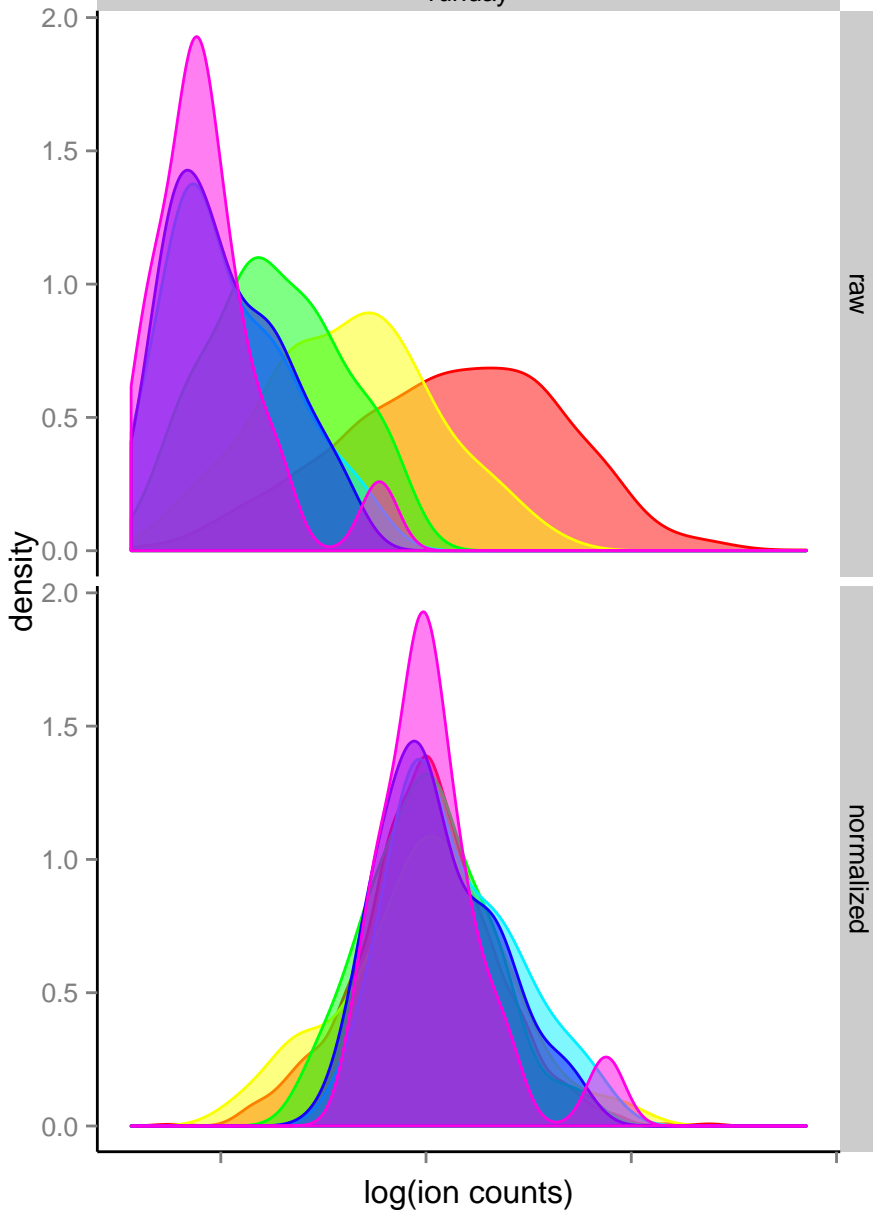

PLATFORMRUNDAY\_miss

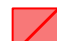

0%

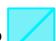

15%

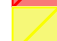

3%

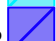

24%

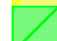

6%

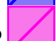

50%



# glycerate

runday

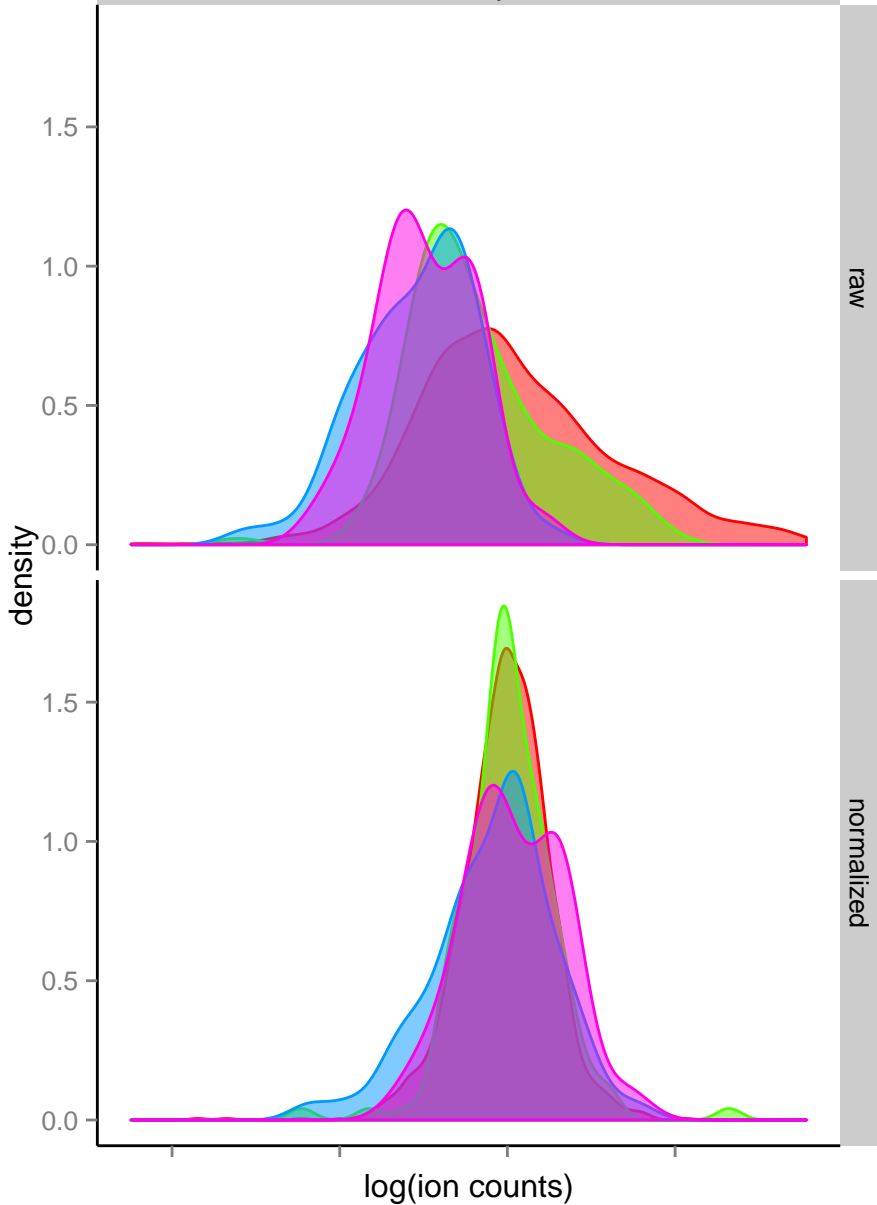

raw

normalized

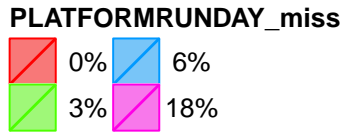

# glycerol

runday

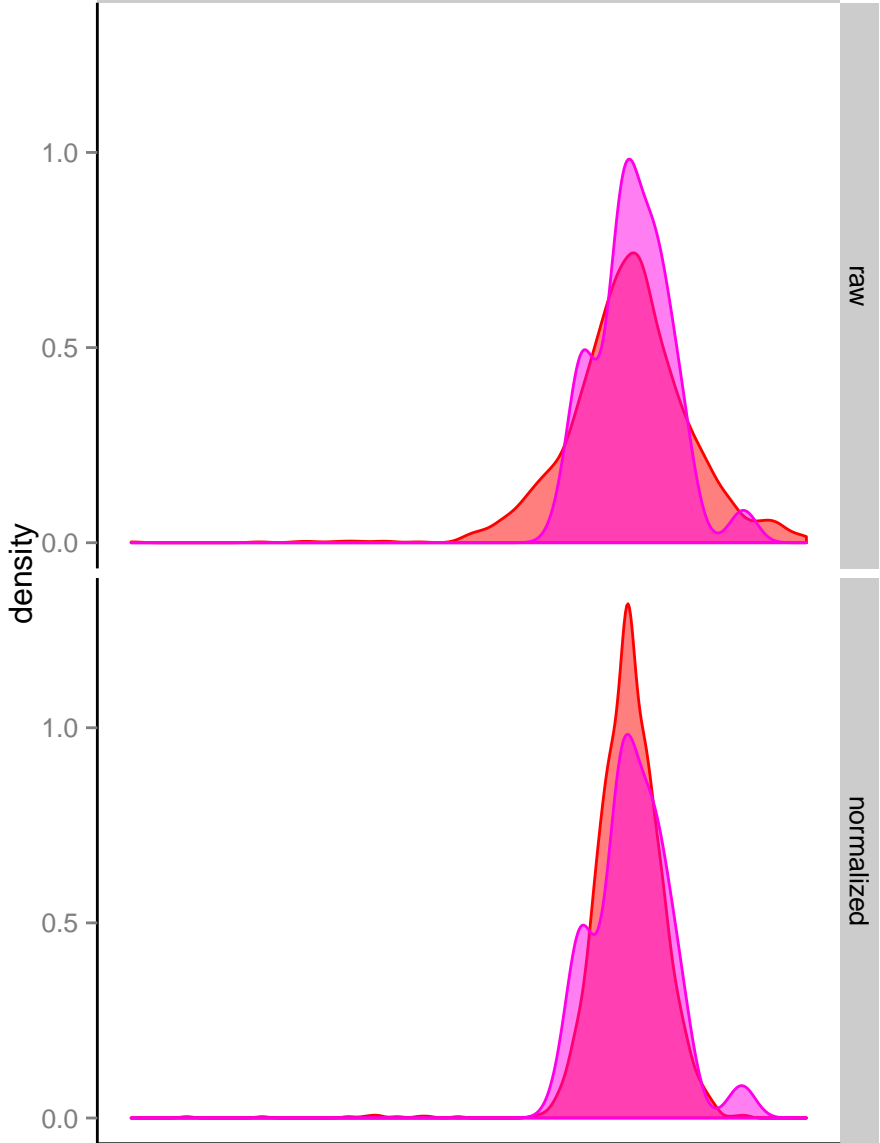

raw

normalized

**PLATFORMRUNDAY\_miss**  
0% 3%

log(ion counts)

# glycerol 2-phosphate

runday

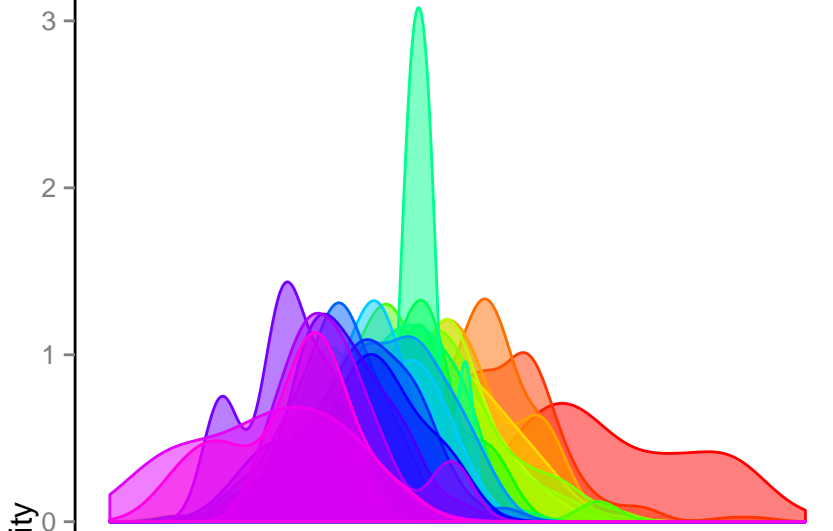

raw

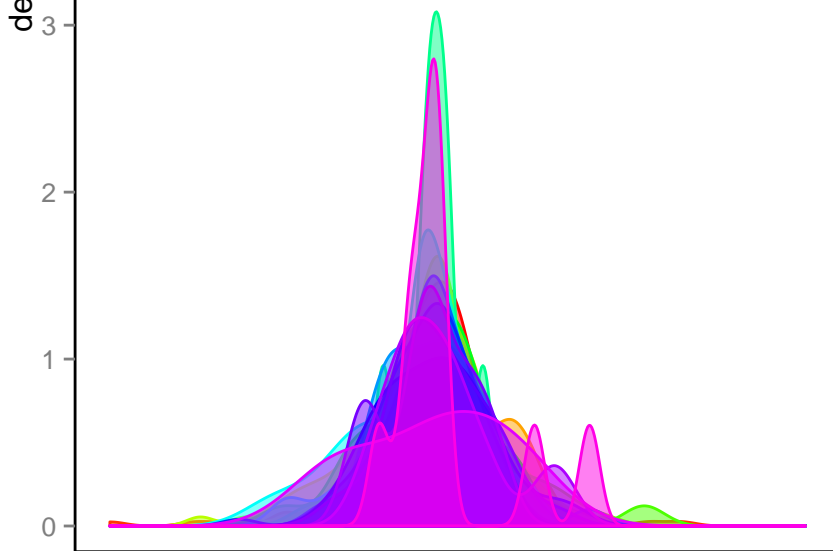

normalized

## PLATFORMRUNDAY\_miss

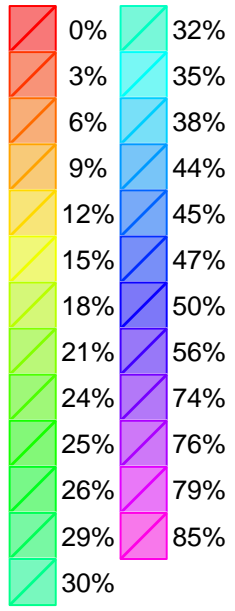

log(ion counts)

# glycerol 3-phosphate (G3P)

runday

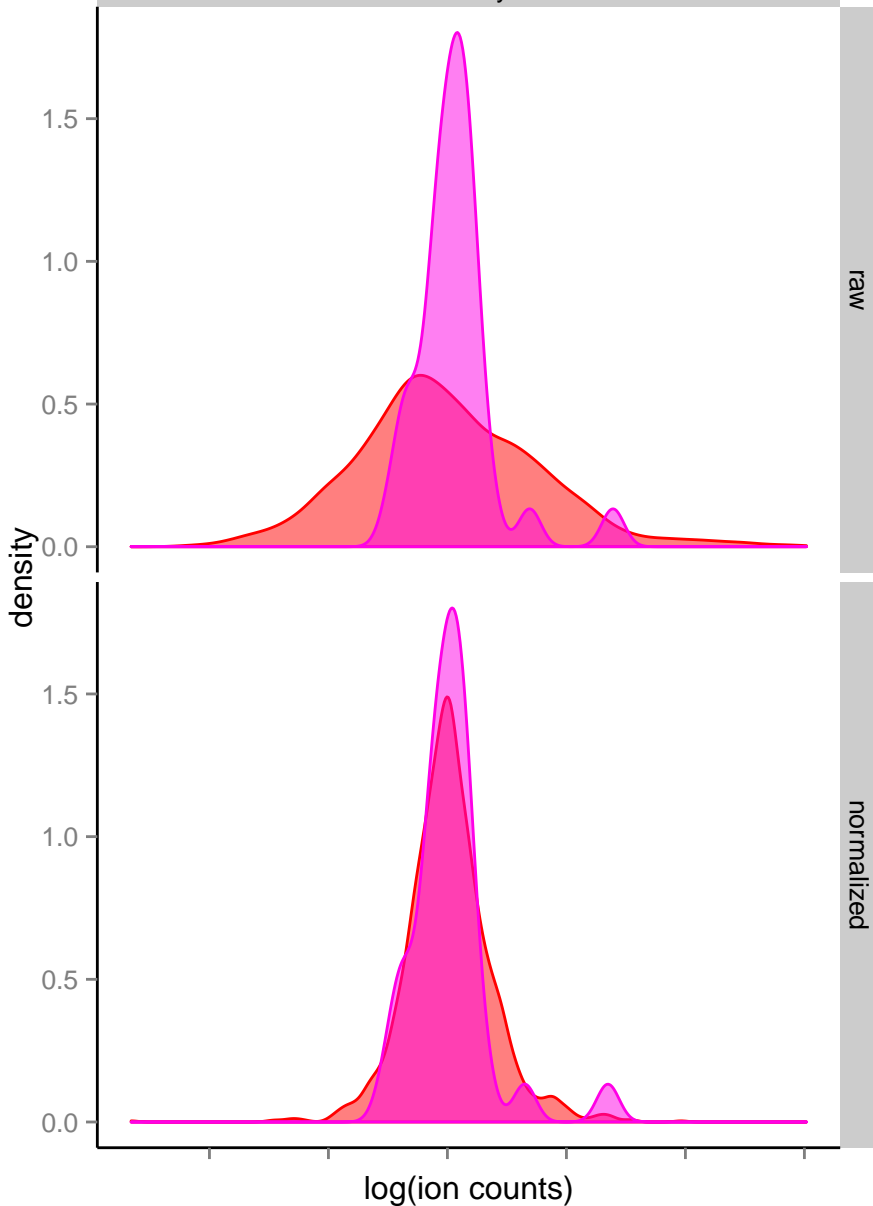

raw

normalized

**PLATFORMRUNDAY\_miss**



0%



3%

# glycerophosphorylcholine (GPC)

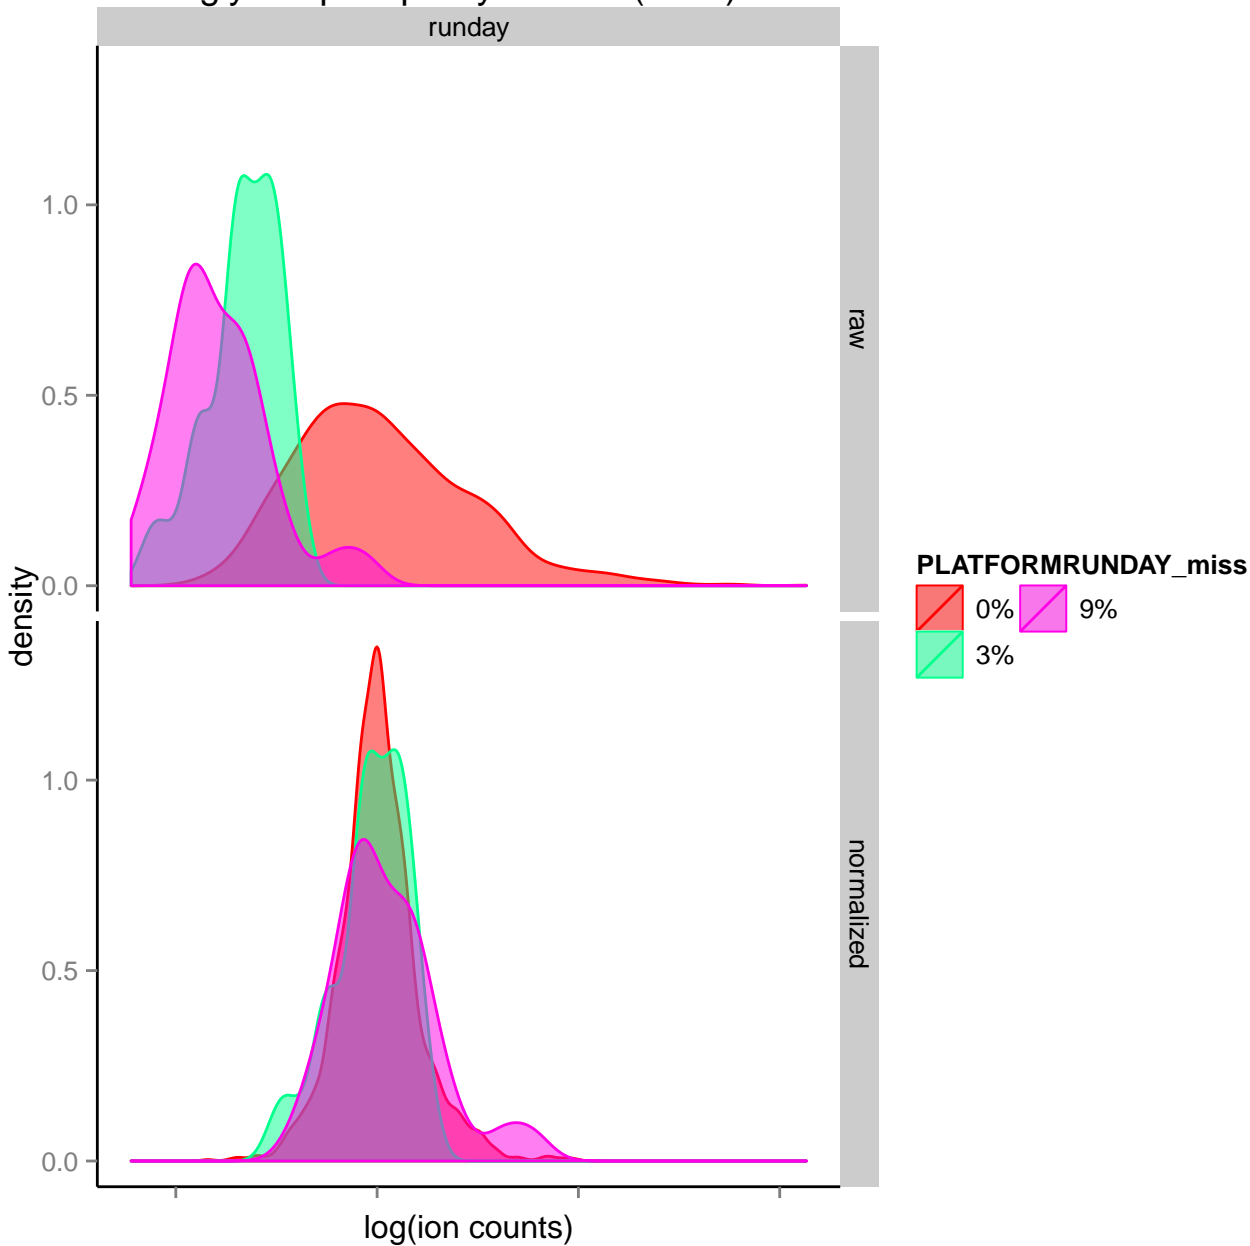

glycine

runday

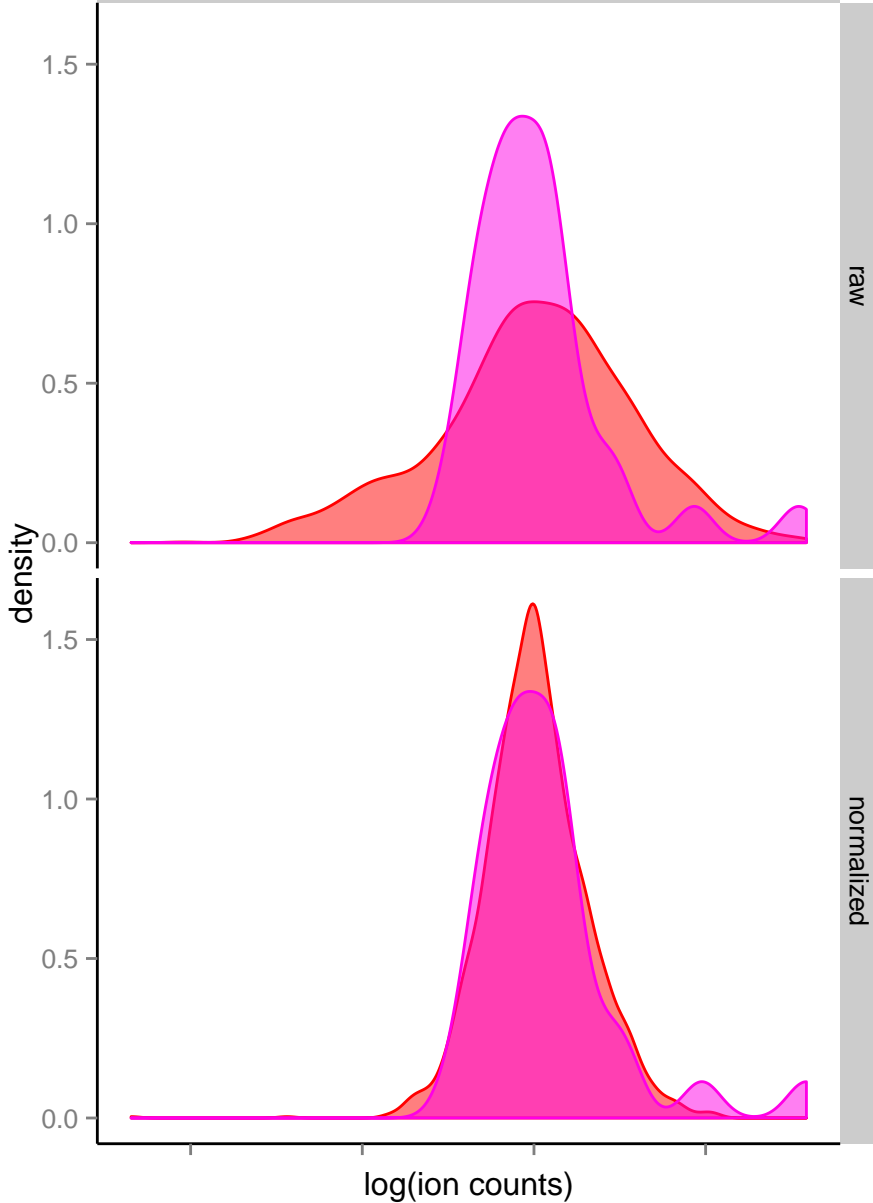

raw

normalized

PLATFORMRUNDAY\_miss

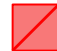

0%

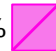

3%

# glycochenodeoxycholate

runday

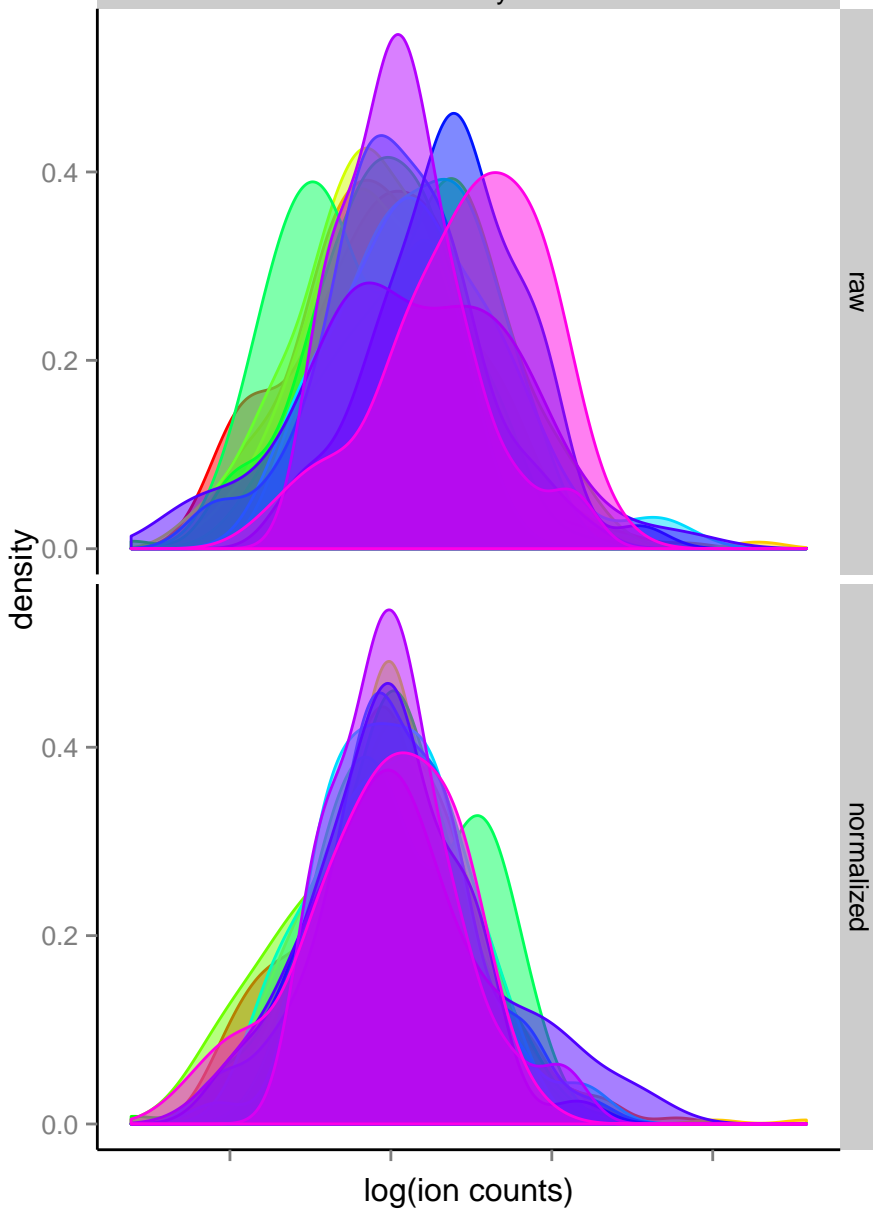

## PLATFORMRUNDAY\_miss

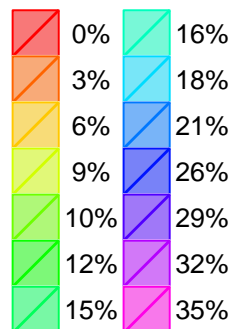

# glycocholate

runday

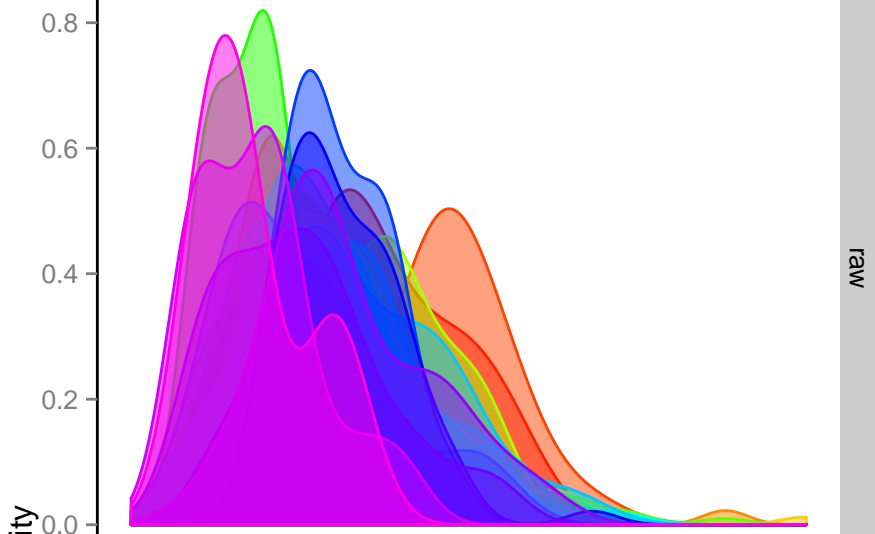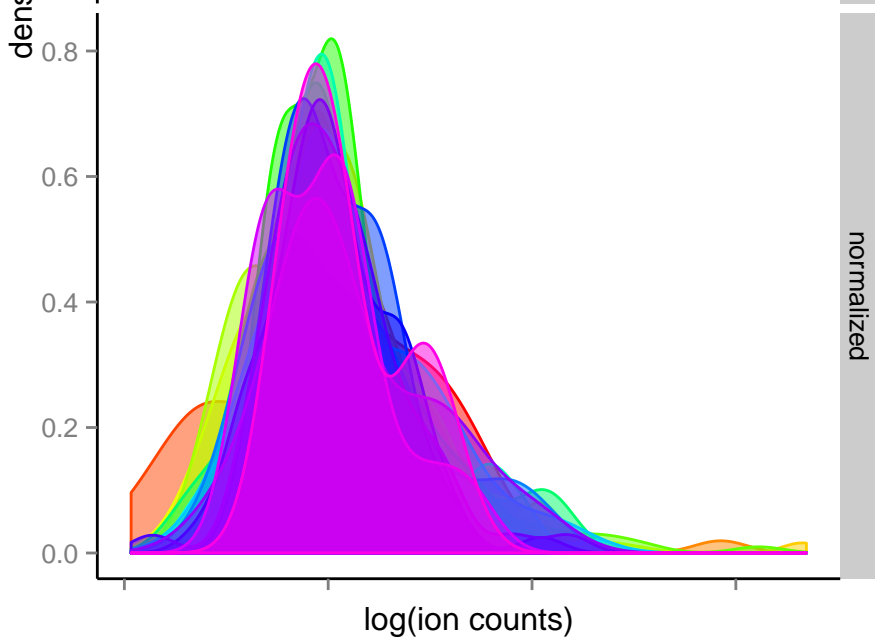

**PLATFORMRUNDAY\_miss**

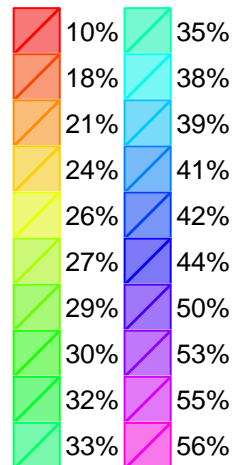



# glycodeoxycholate

runday

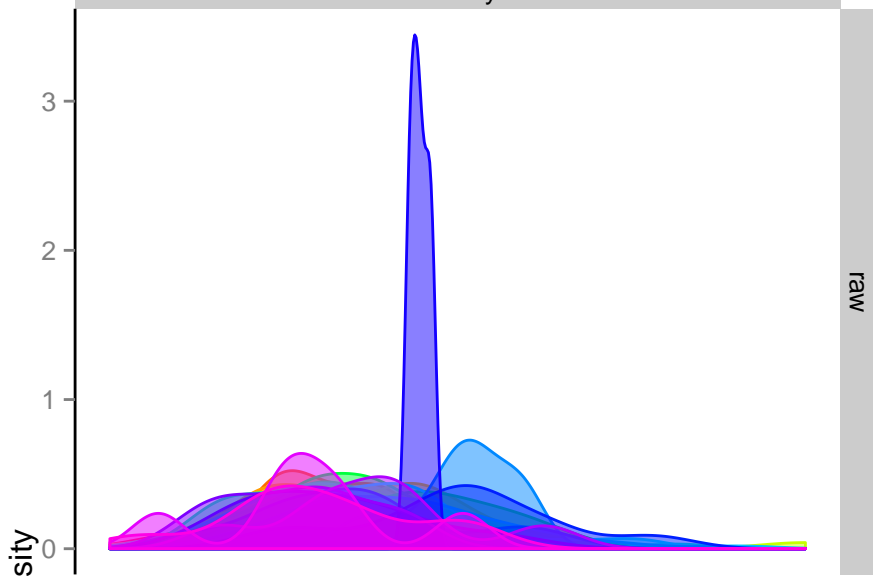

raw

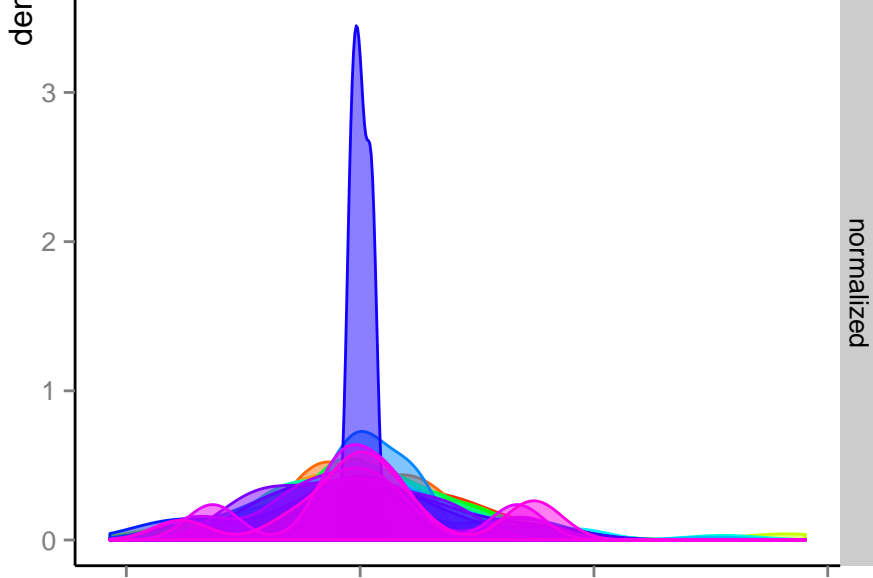

normalized

log(ion counts)

## PLATFORMRUNDAY\_miss

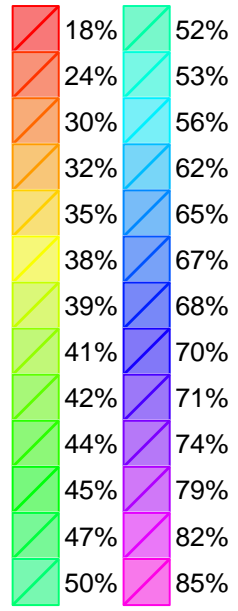

# glycylvaline

runday

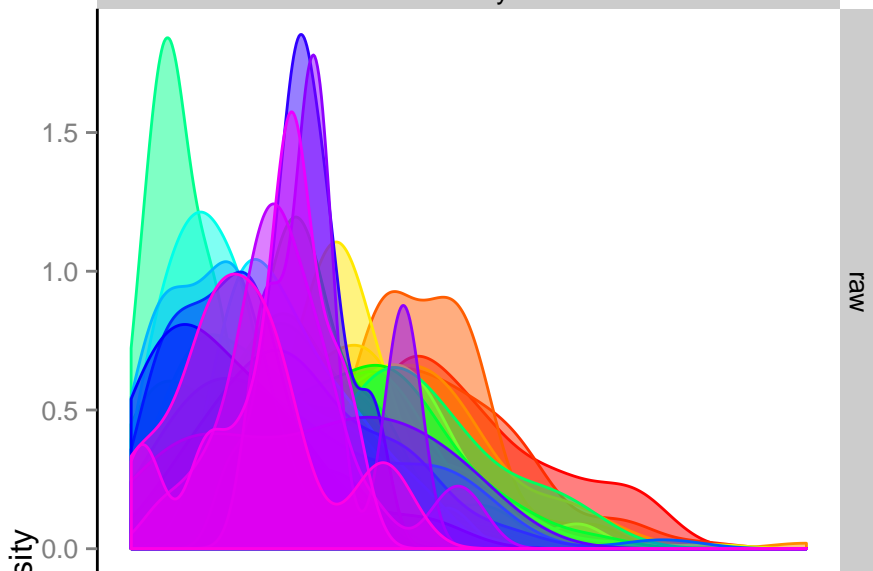

raw

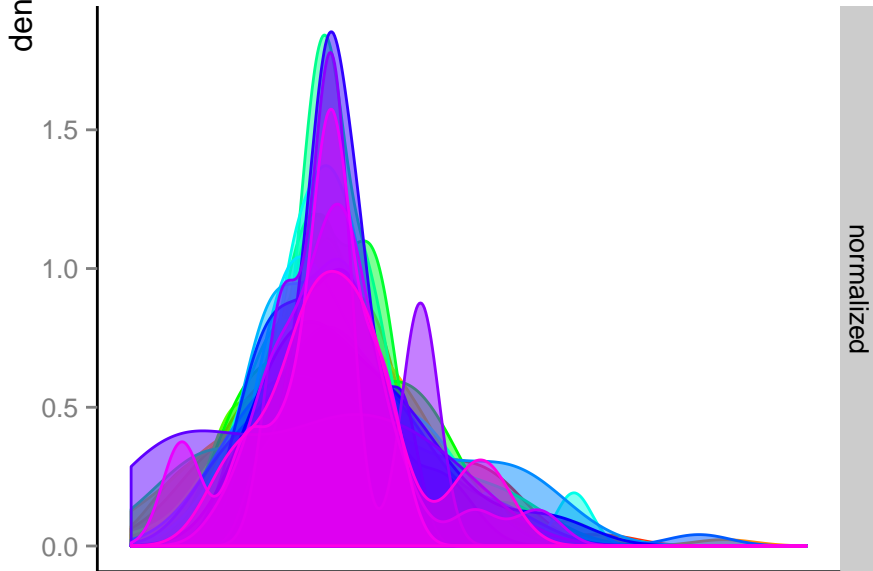

normalized

## PLATFORMRUNDAY\_miss

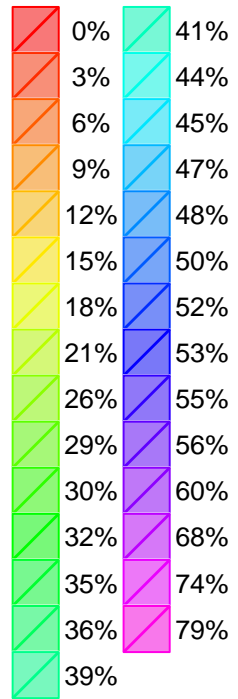

# guanosine

runday

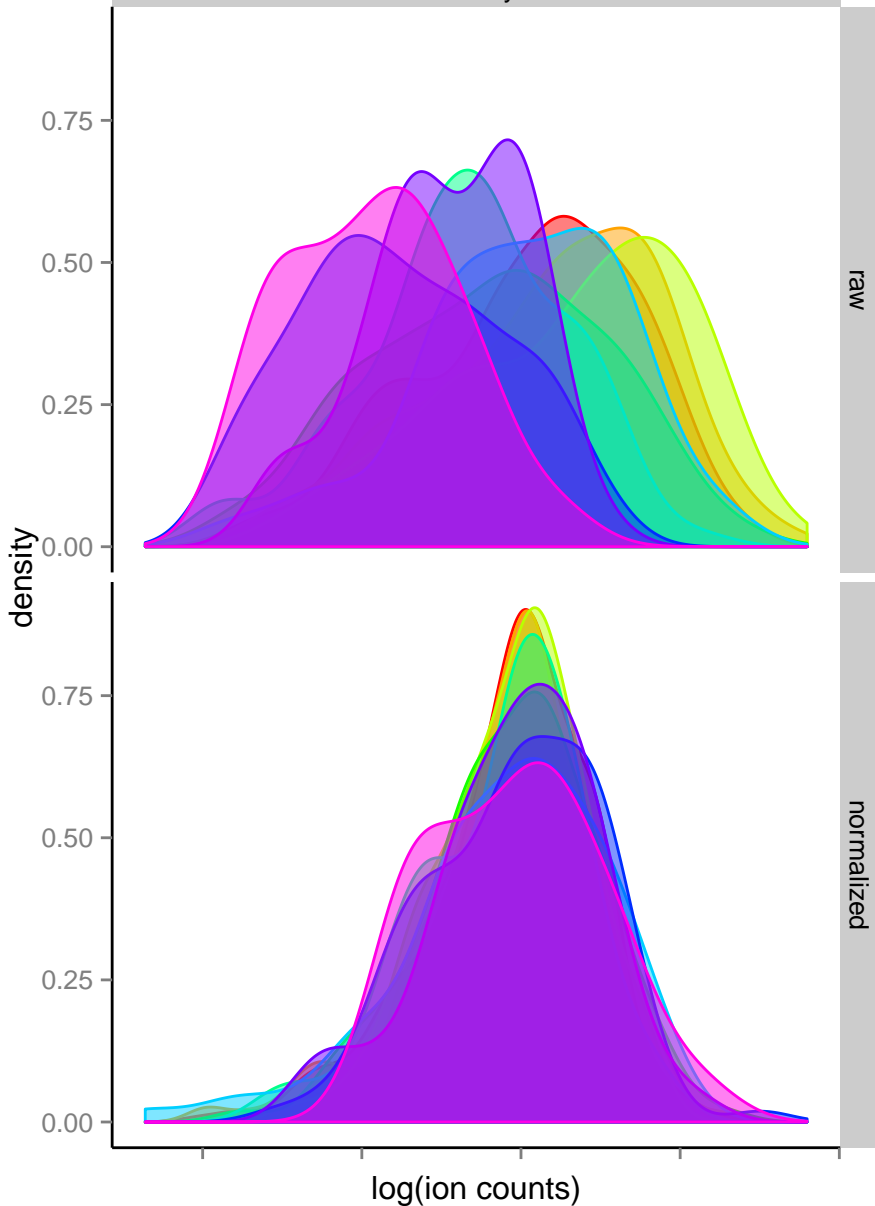

## PLATFORMRUNDAY\_miss

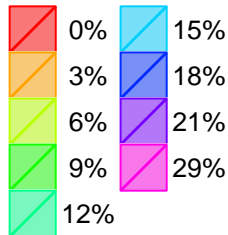

heme\*

runday

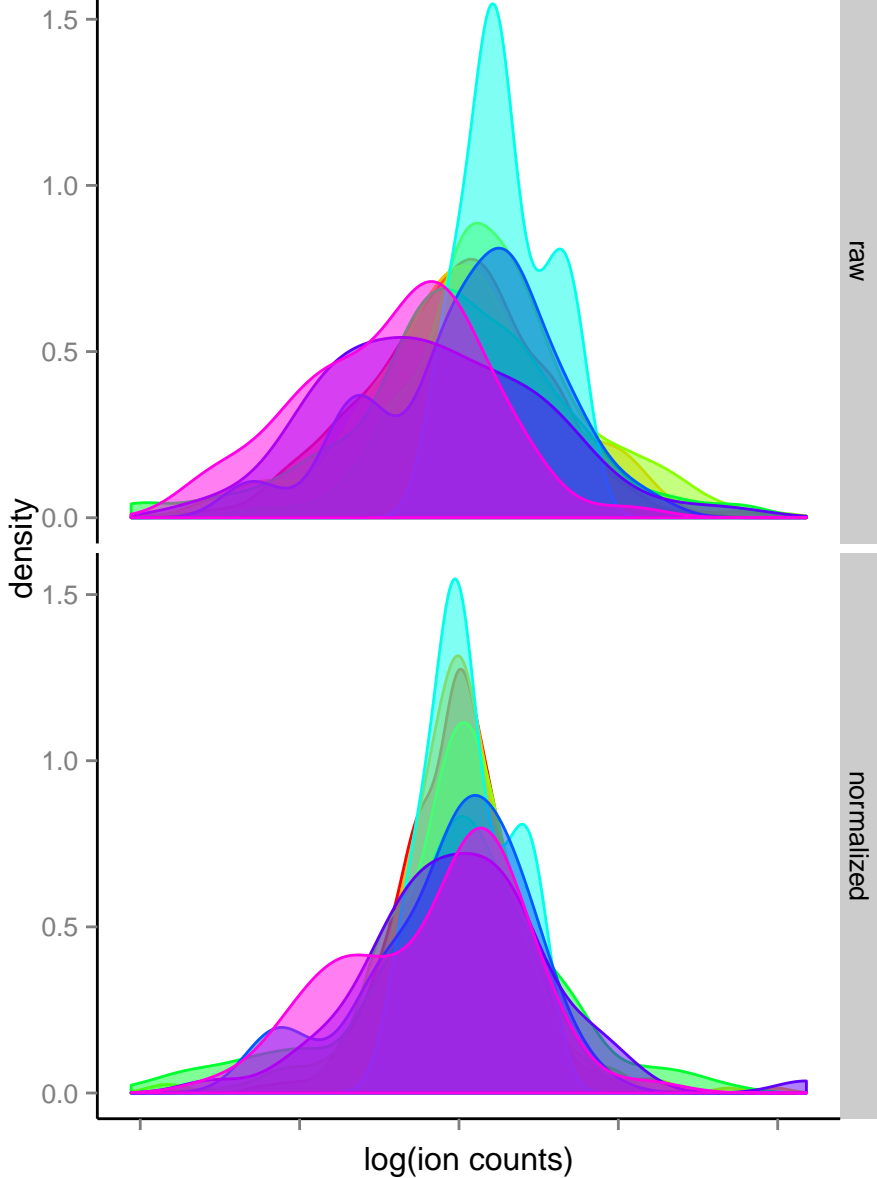

**PLATFORMRUNDAY\_miss**

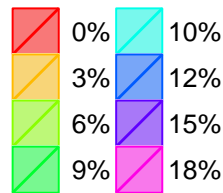

# heptanoate (7:0)

runday

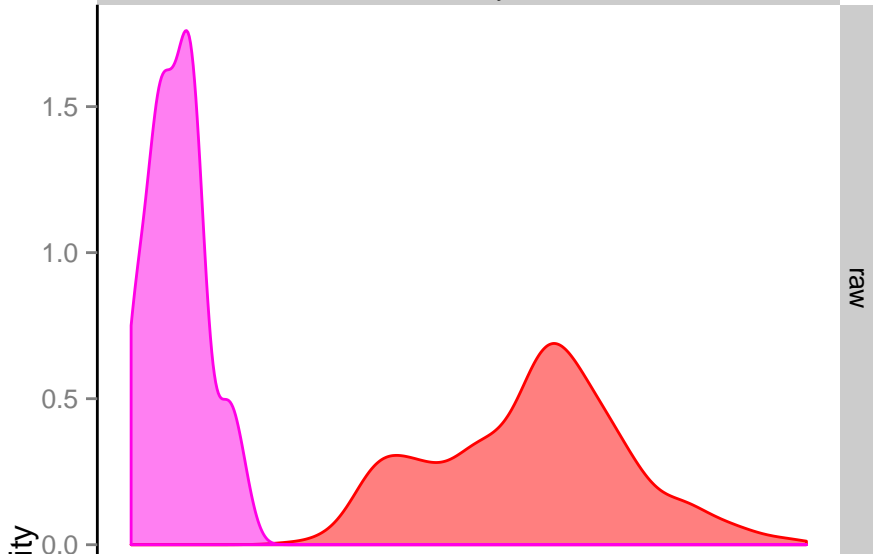

raw

**PLATFORMRUNDAY\_miss**

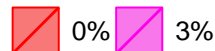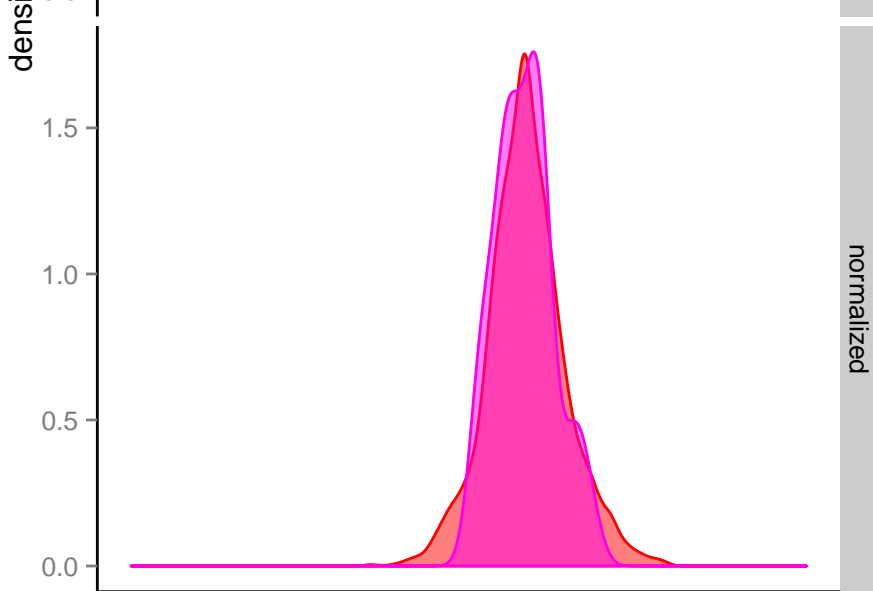

normalized

log(ion counts)

# hexadecanedioate

runday

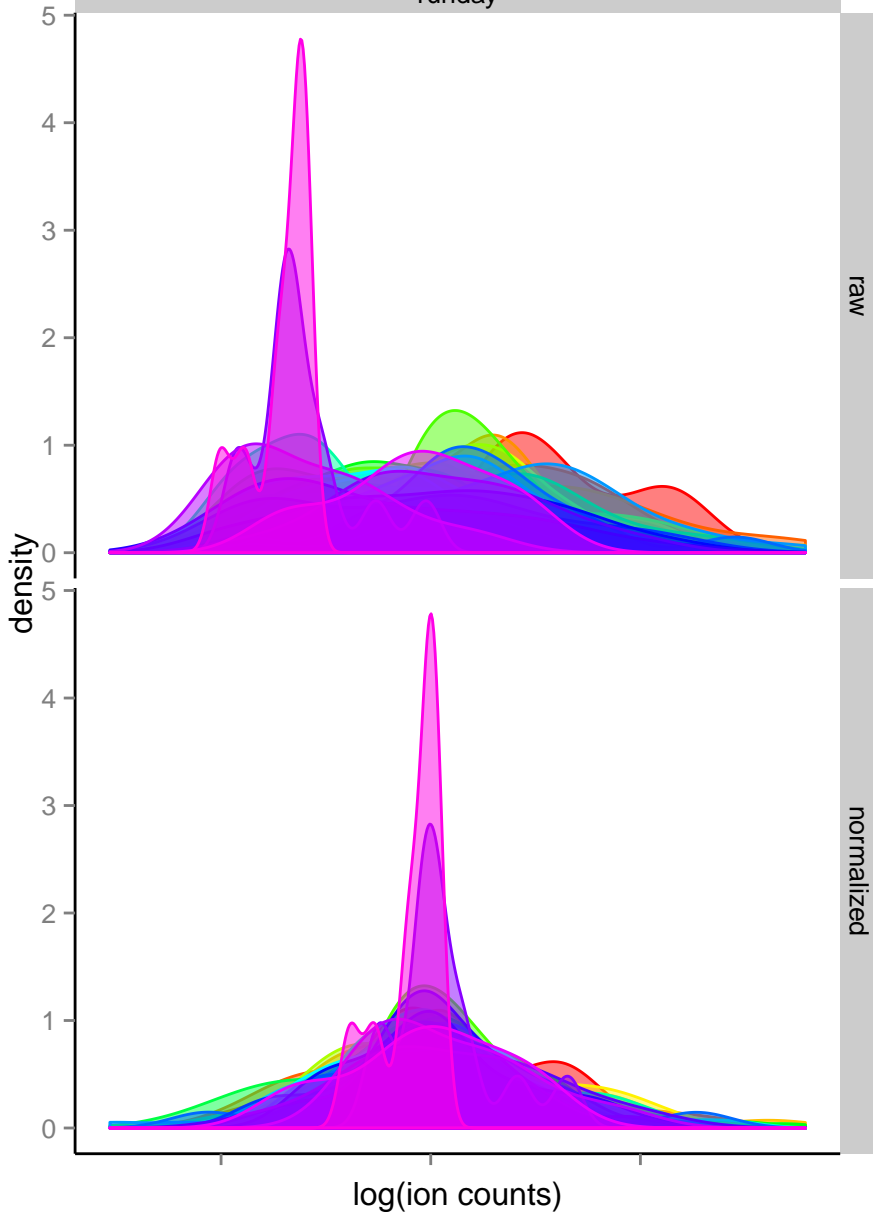

## PLATFORMRUNDAY\_miss

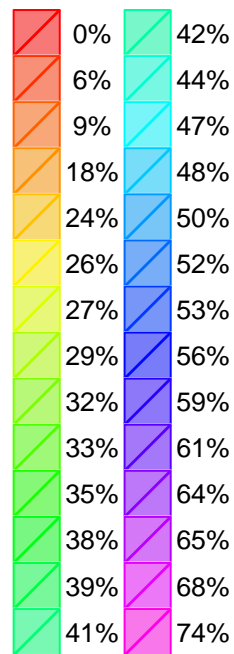

# hexanoylcarnitine

runday

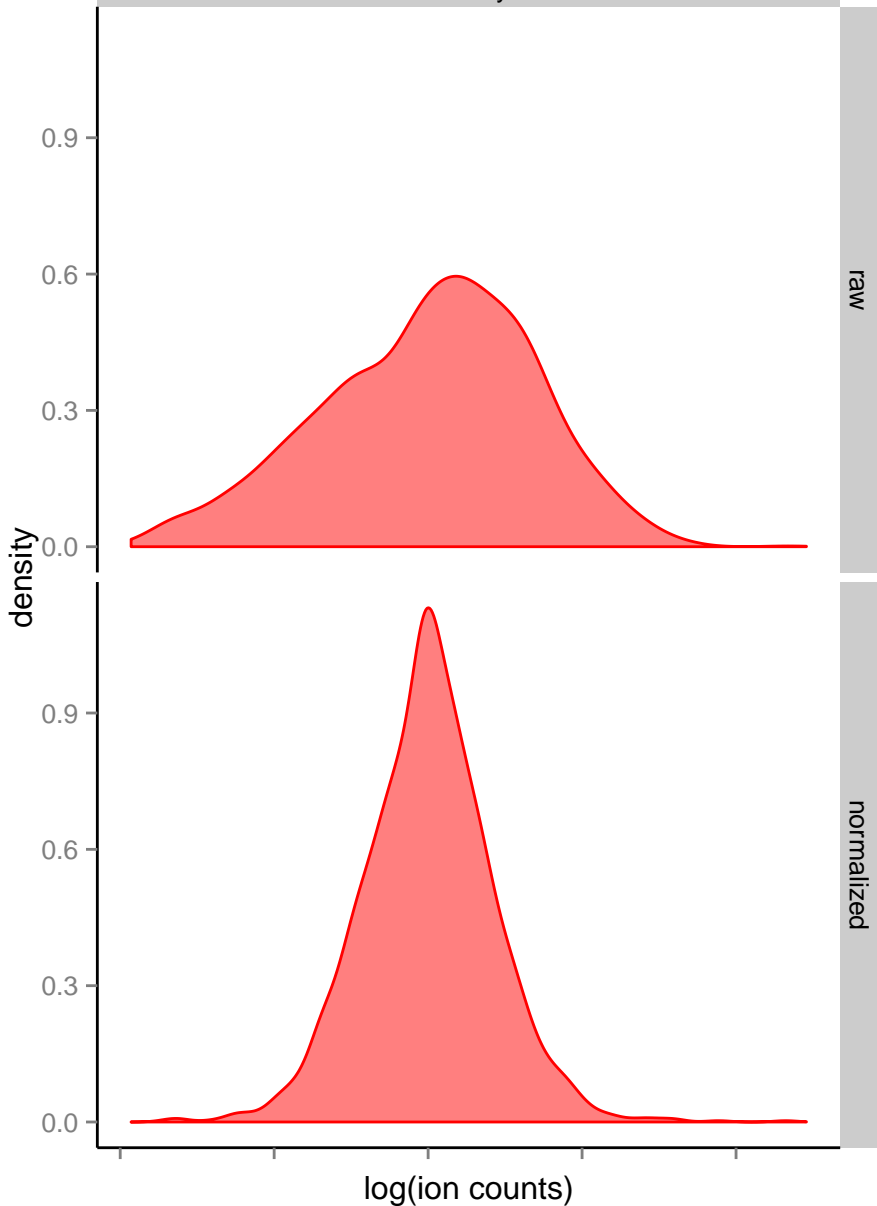

raw

normalized

PLATFORMRUNDAY\_miss

0%

# hippurate

runday

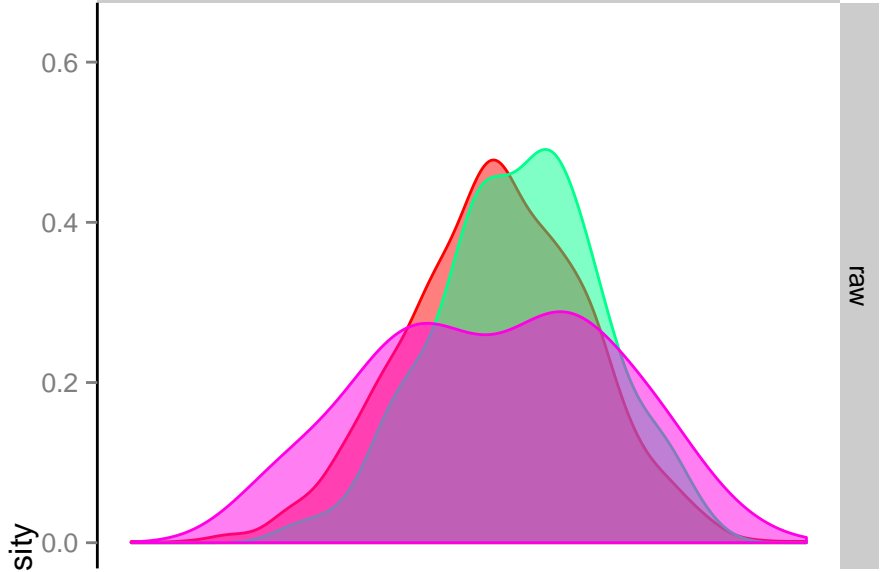

raw

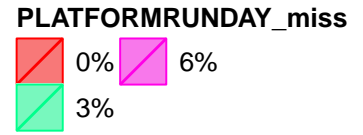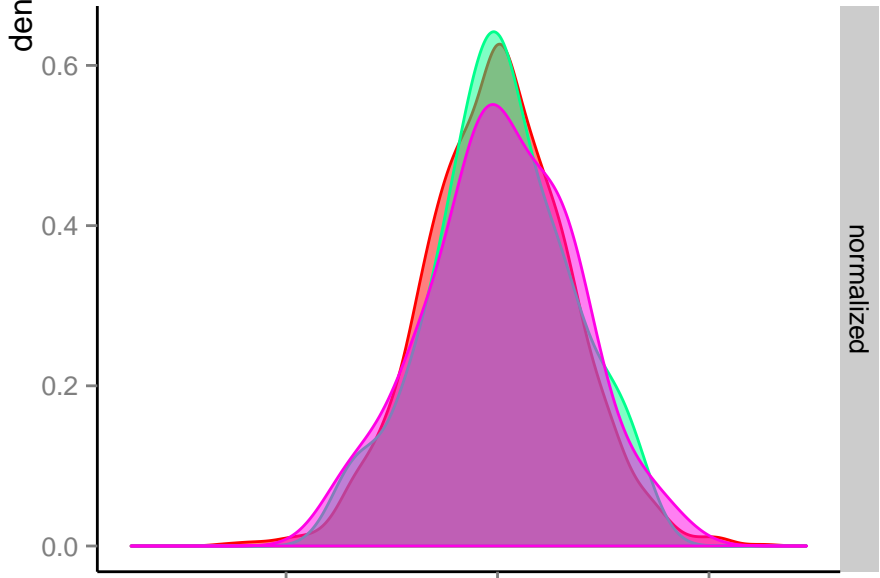

normalized

log(ion counts)



# histidine

runday

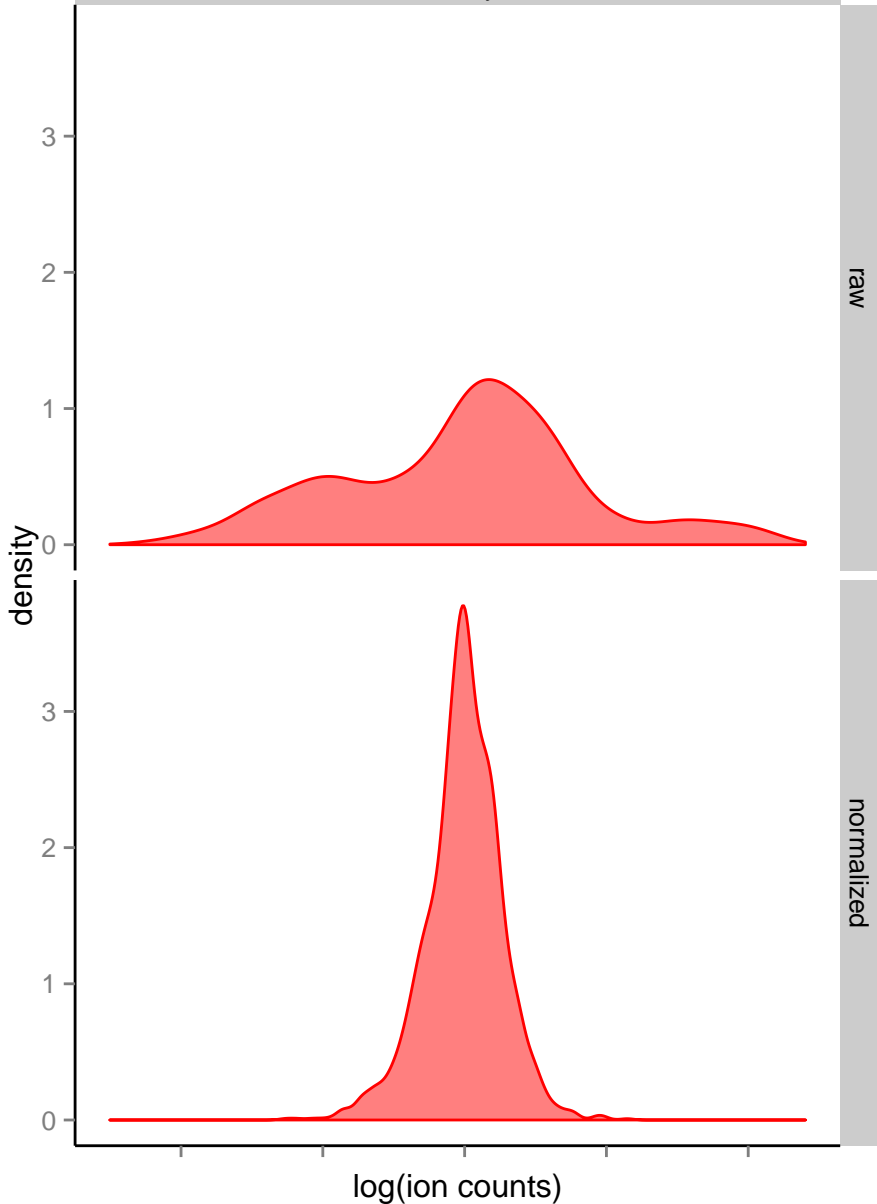

PLATFORMRUNDAY\_miss

0%

# homocitrulline

runday

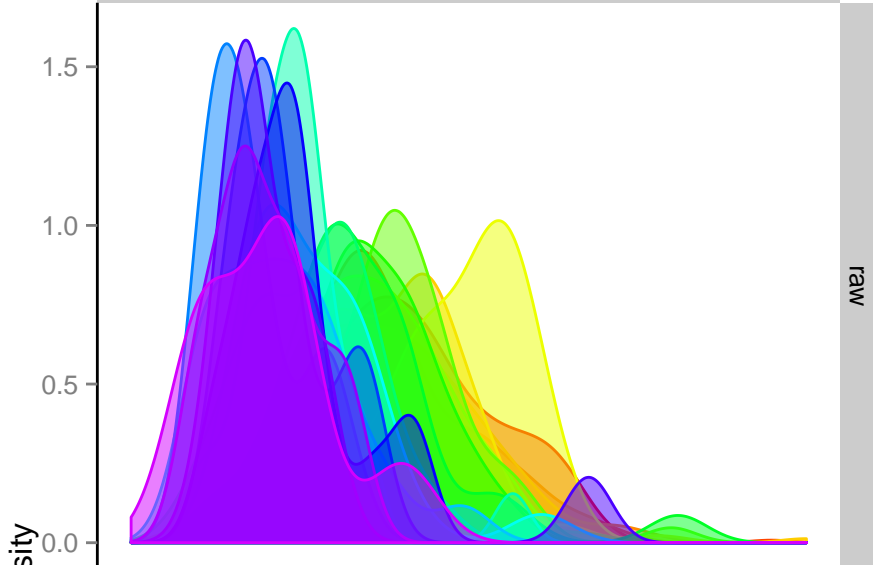

raw

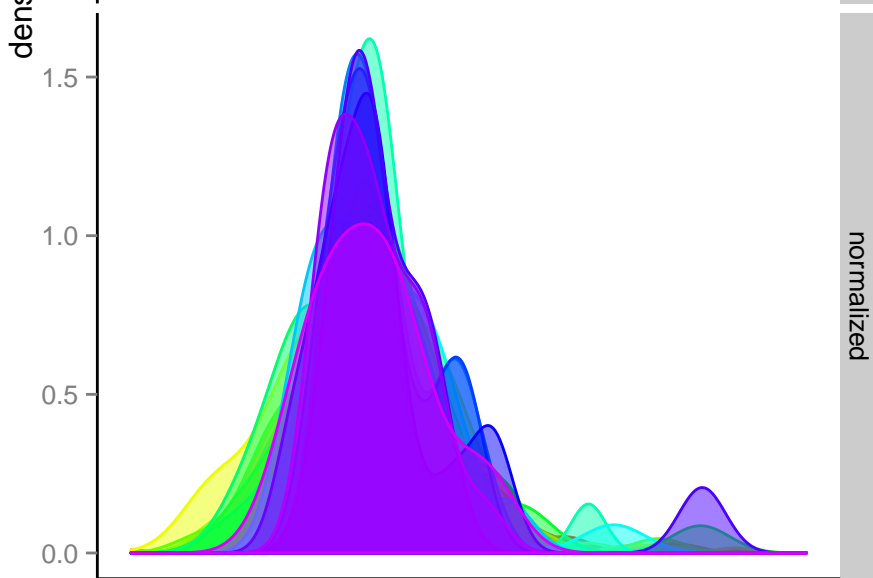

normalized

## PLATFORMRUNDAY\_miss

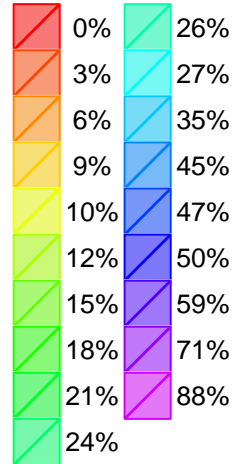

log(ion counts)

# homostachydrine\*

runday

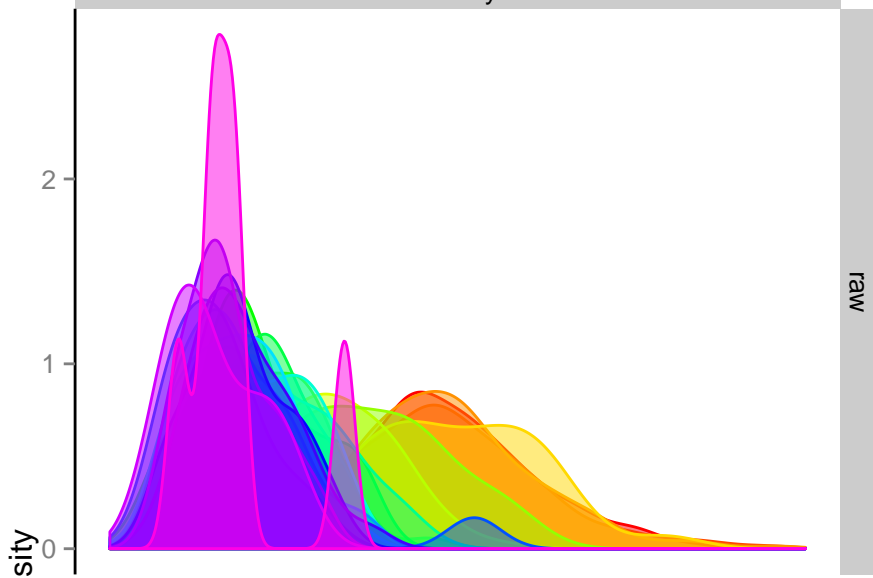

raw

## PLATFORMRUNDAY\_miss

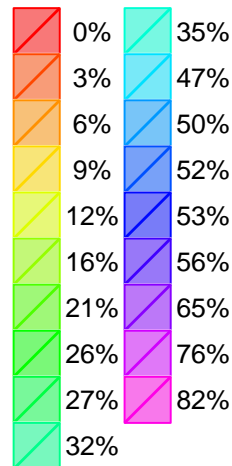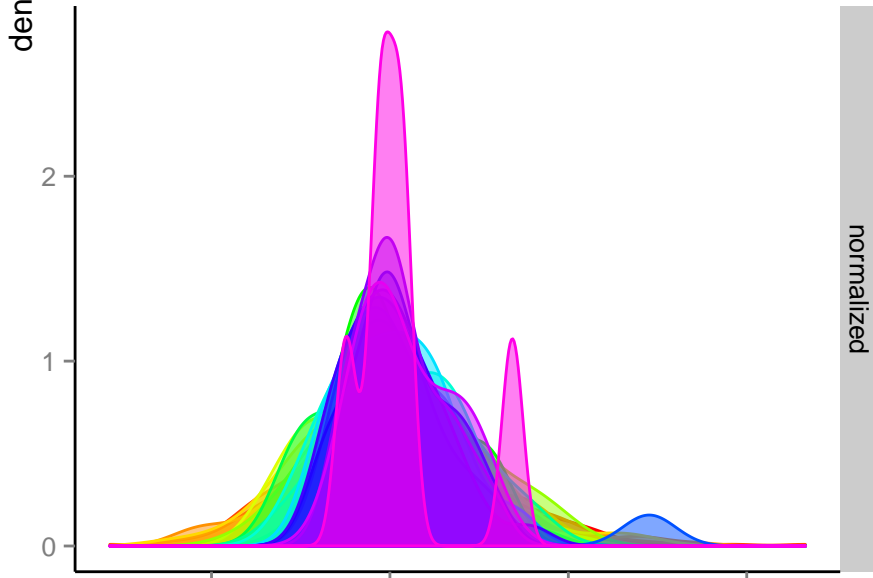

normalized

log(ion counts)

# HWESASXX\*

runday

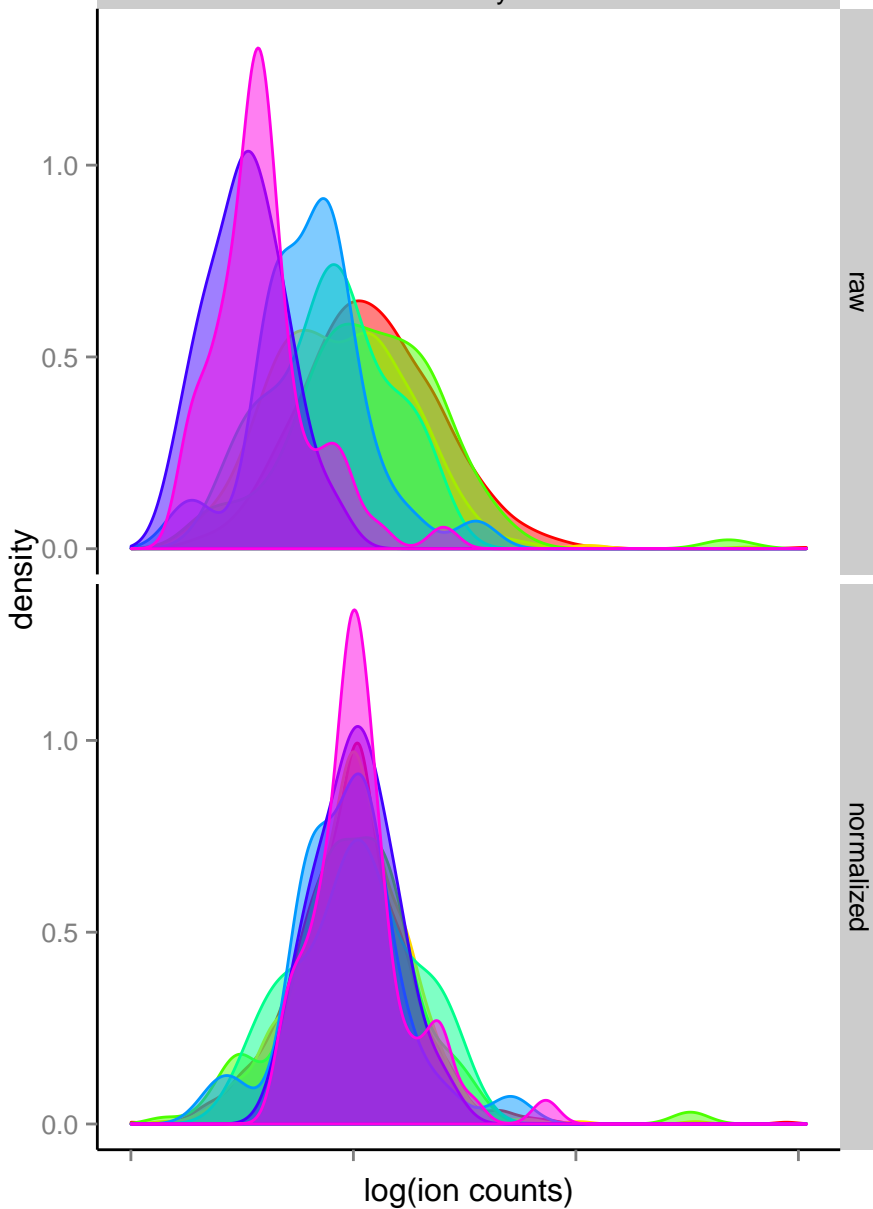

raw

normalized

## PLATFORMRUNDAY\_miss

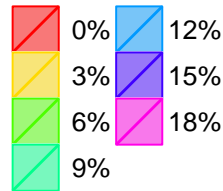

# hydroquinone sulfate

runday

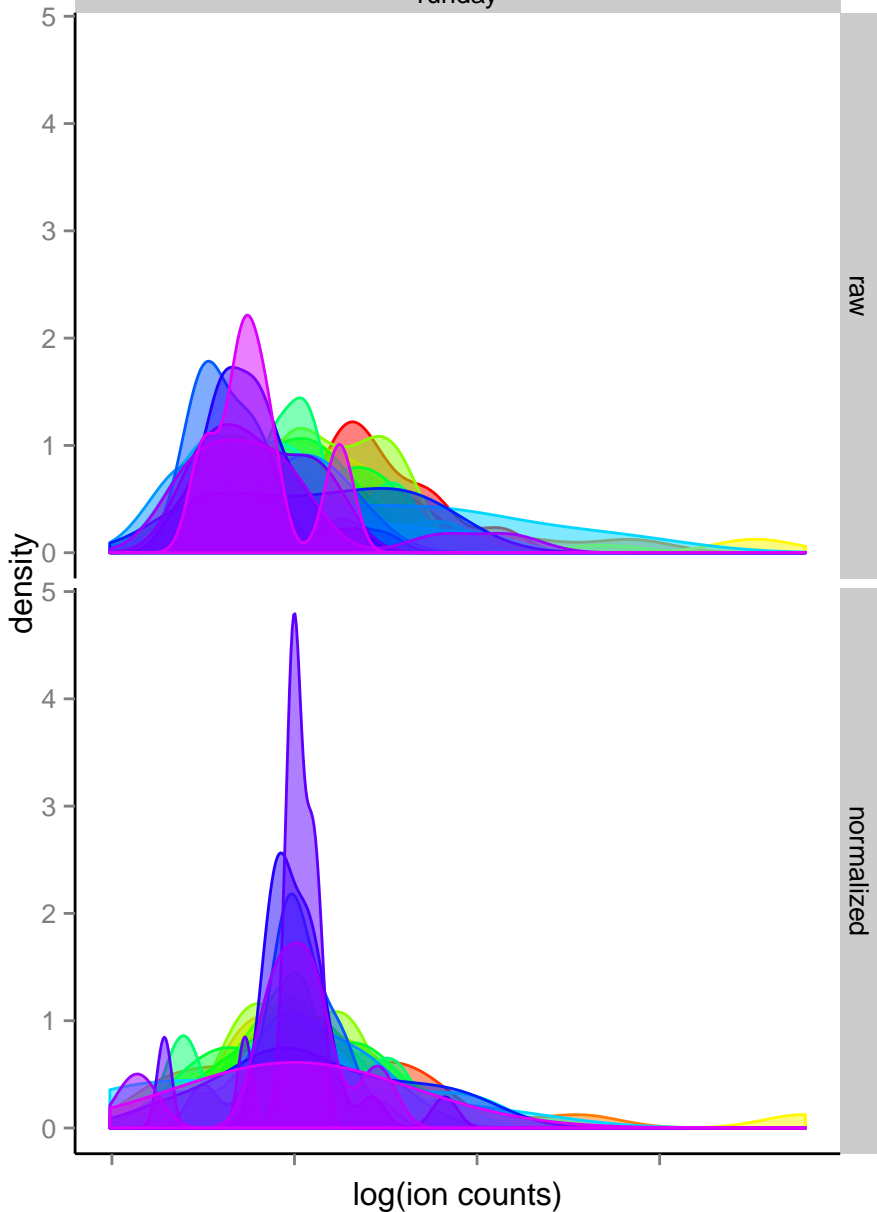

## PLATFORMRUNDAY\_miss

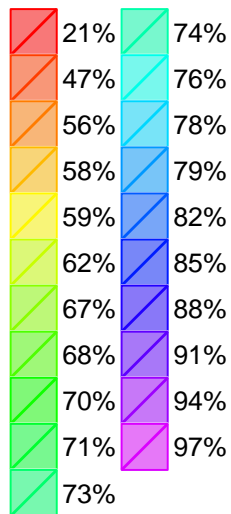

# hydroxyisovaleroylcarnitine

runday

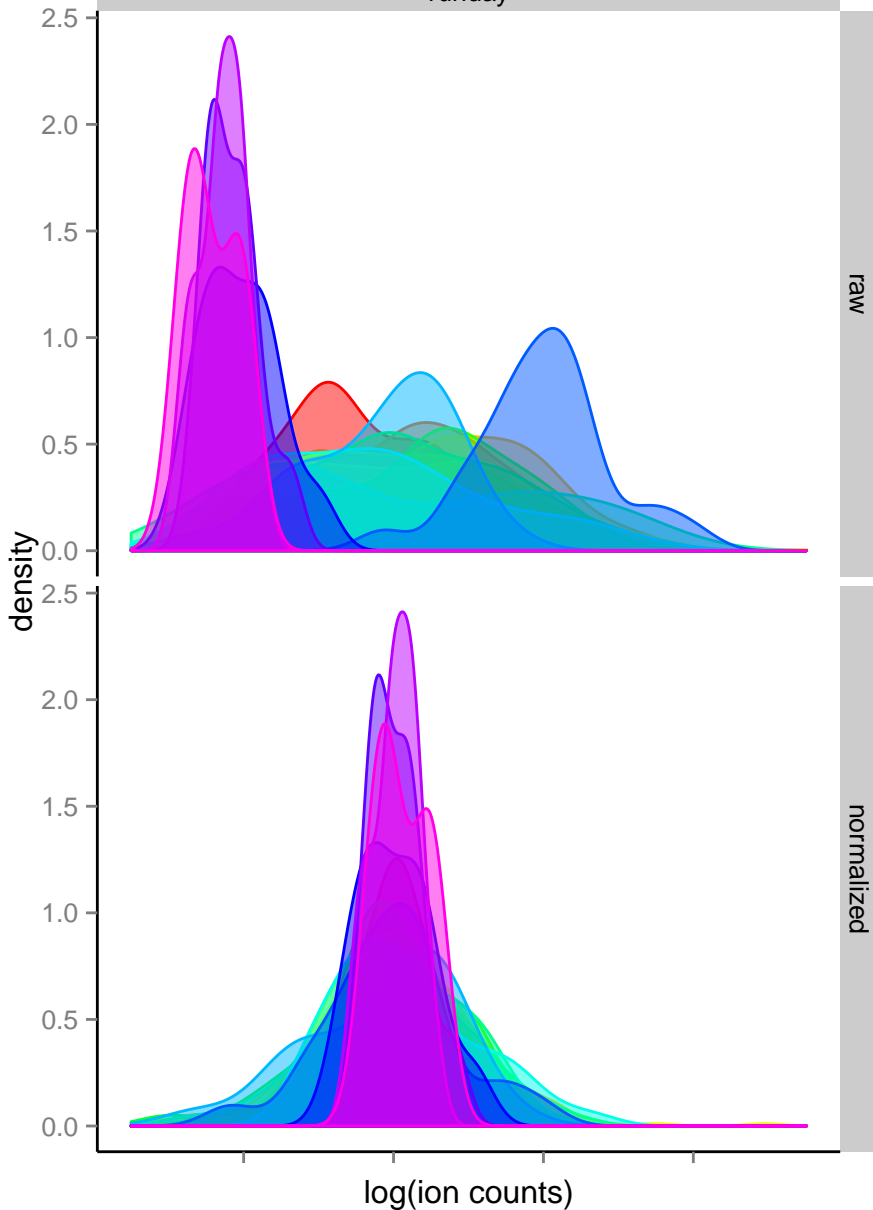

## PLATFORMRUNDAY\_miss

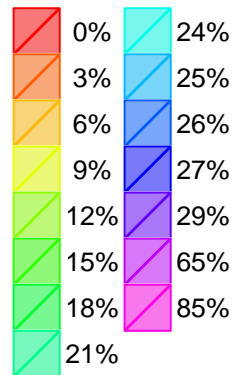

# hydroxyglucuronide\*

runday

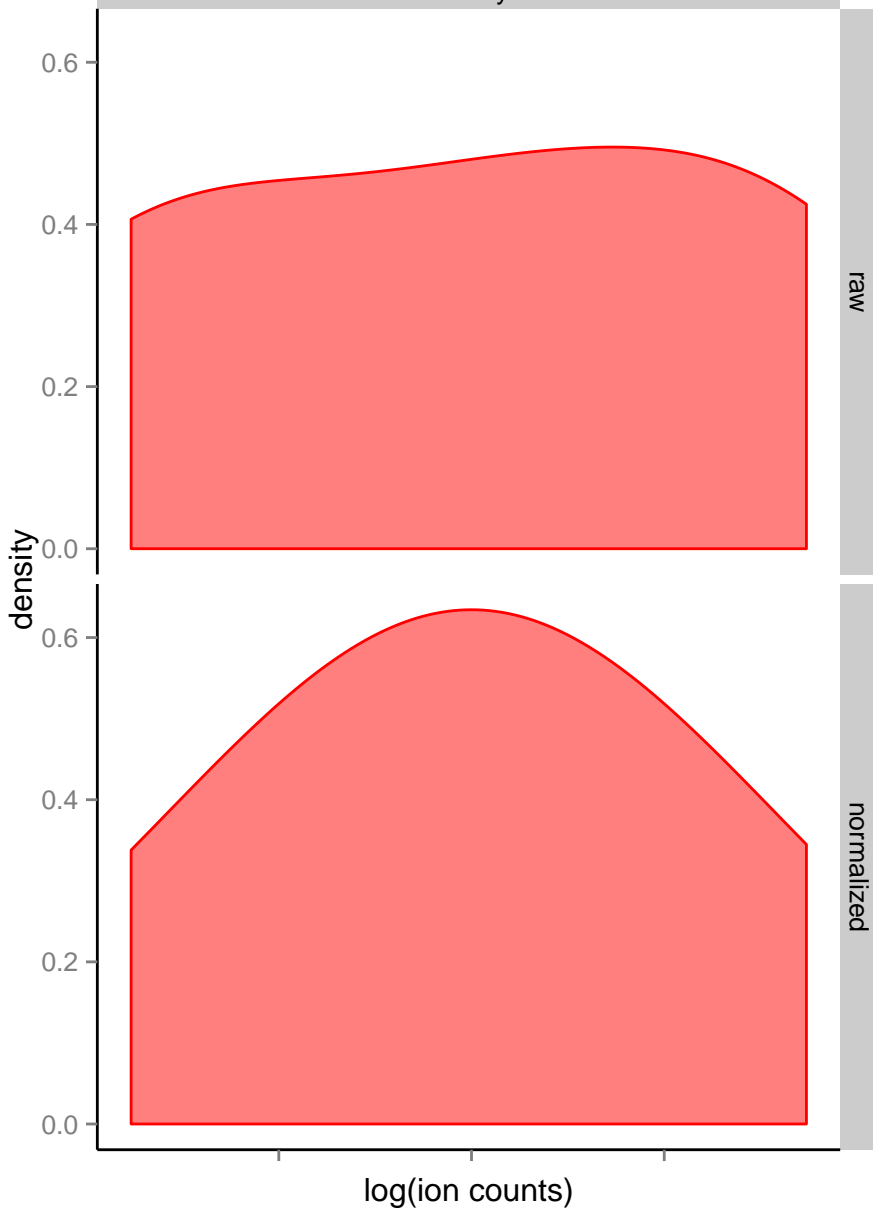

raw

normalized

**PLATFORMRUNDAY\_miss**

97%

# hyodeoxycholate

runday

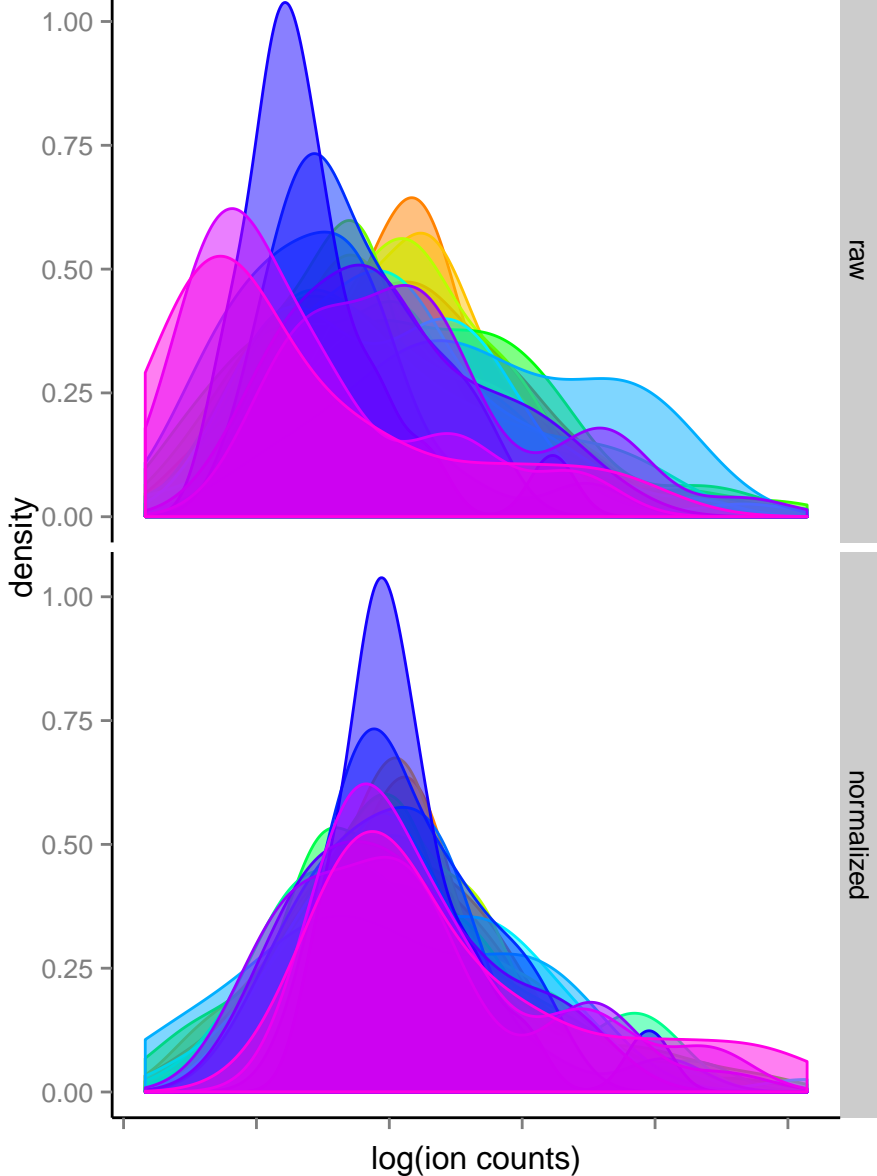

## PLATFORMRUNDAY\_miss

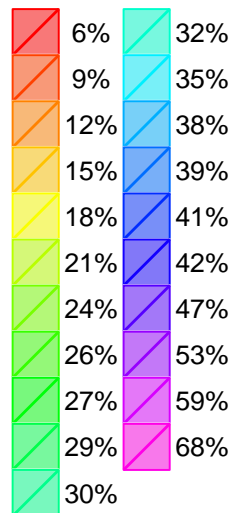



# hypoxanthine

runday

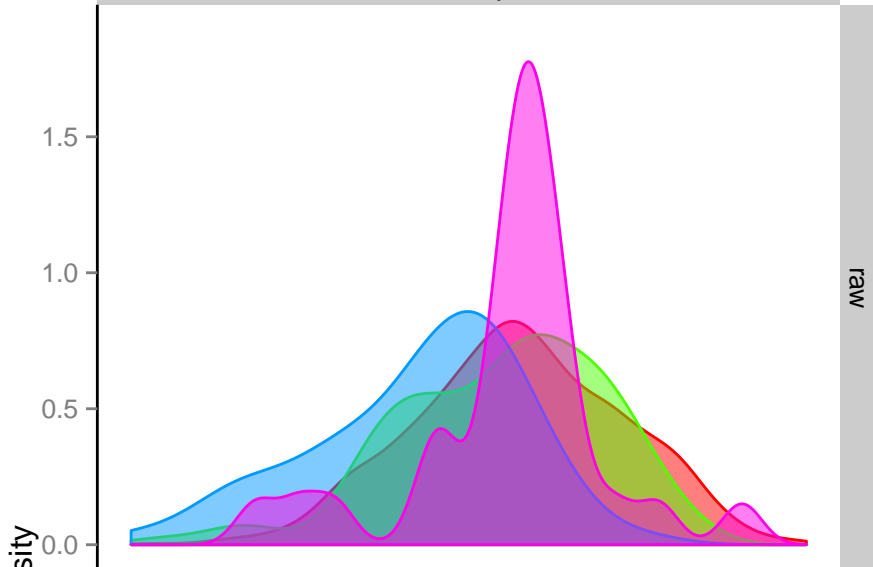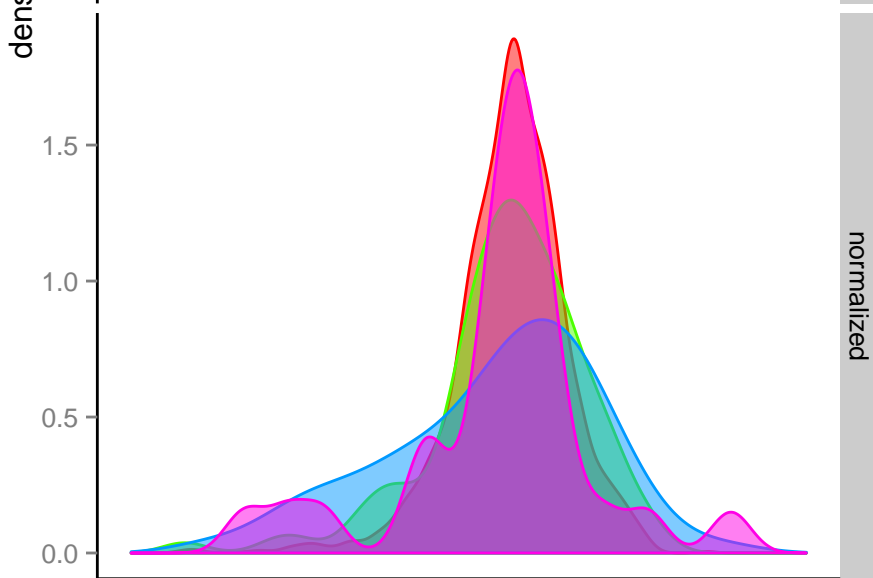

**PLATFORMRUNDAY\_miss**

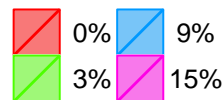

log(ion counts)

# ibuprofen

runday

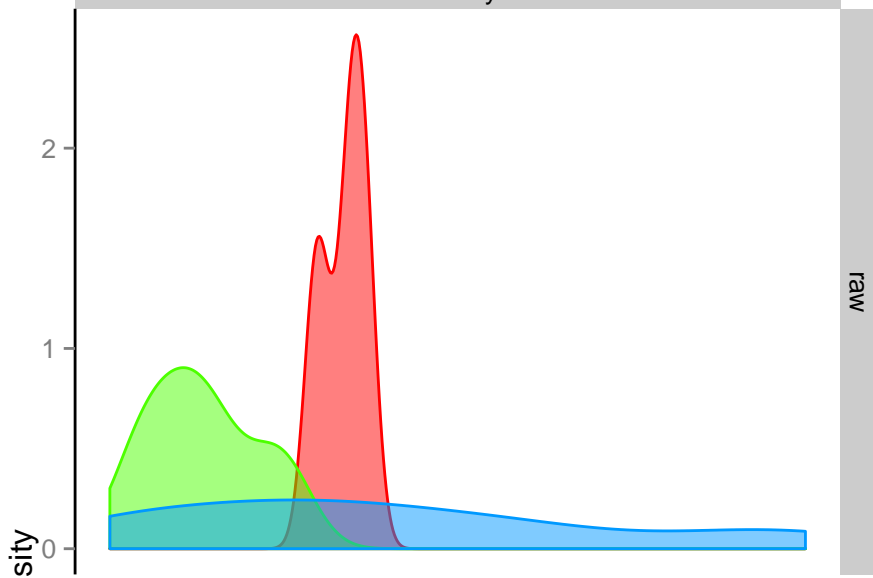

raw

**PLATFORMRUNDAY\_miss**

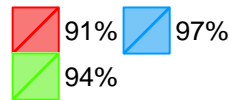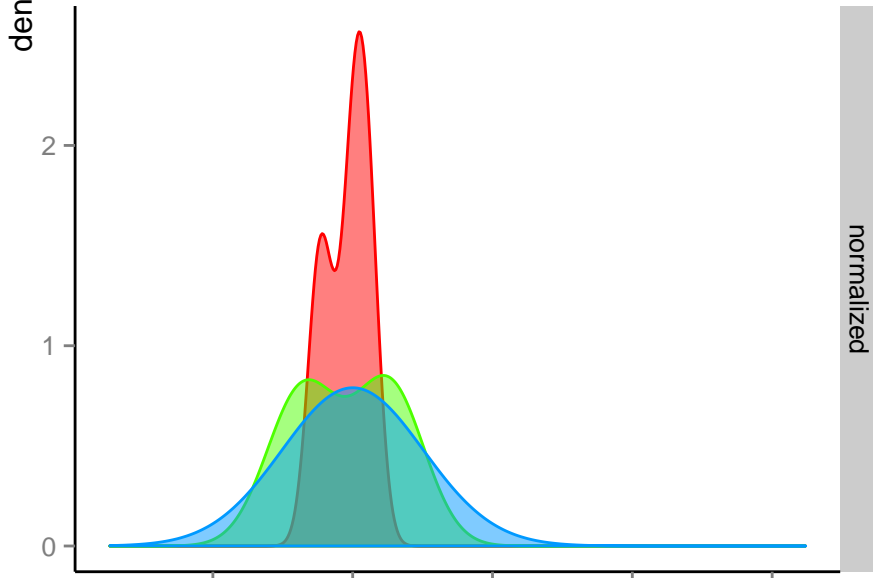

normalized

log(ion counts)

# indoleacetate

runday

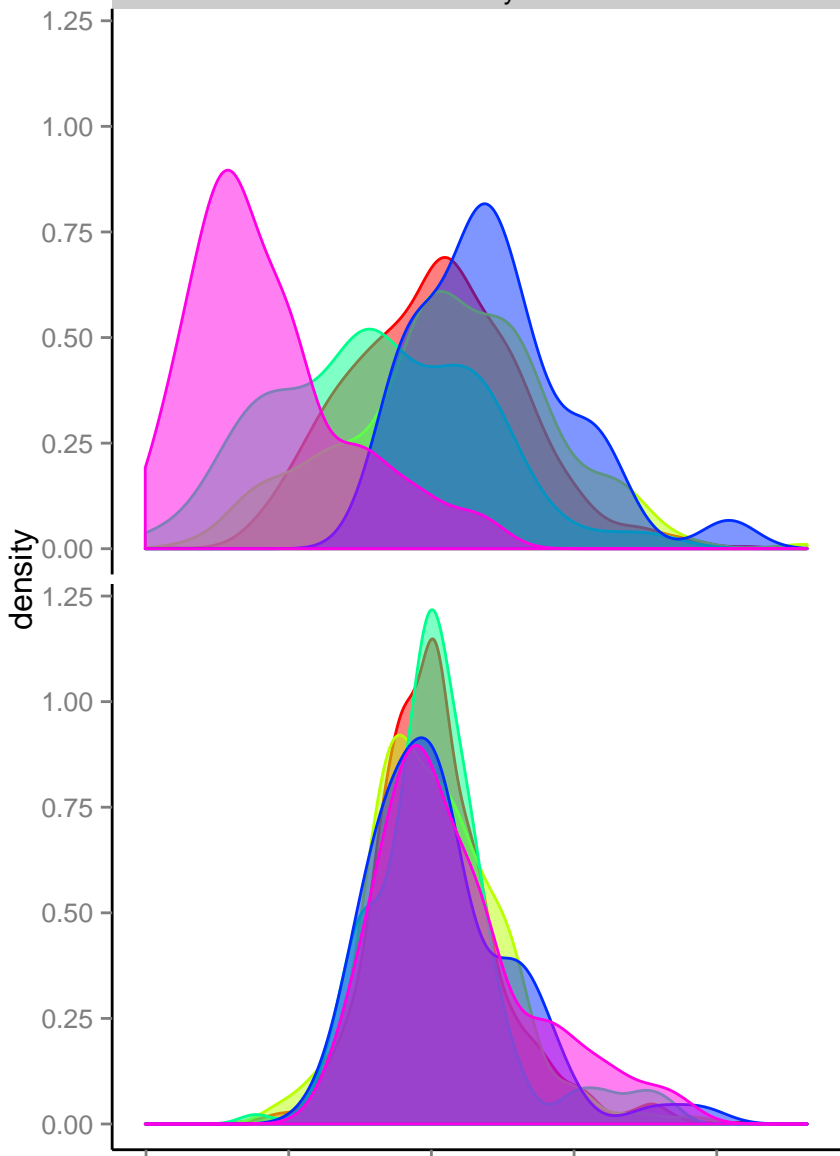

raw

normalized

## PLATFORMRUNDAY\_miss

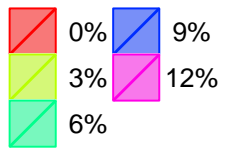

# indolelactate

runday

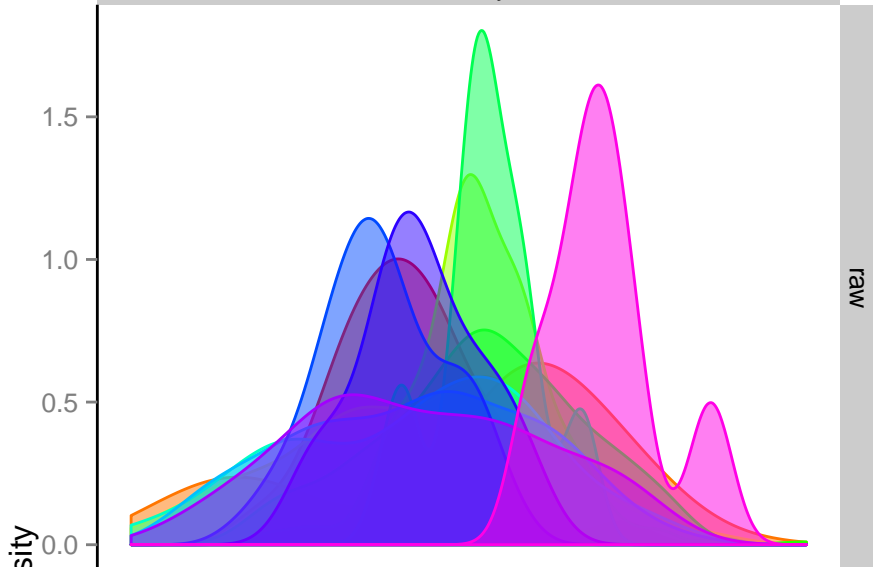

raw

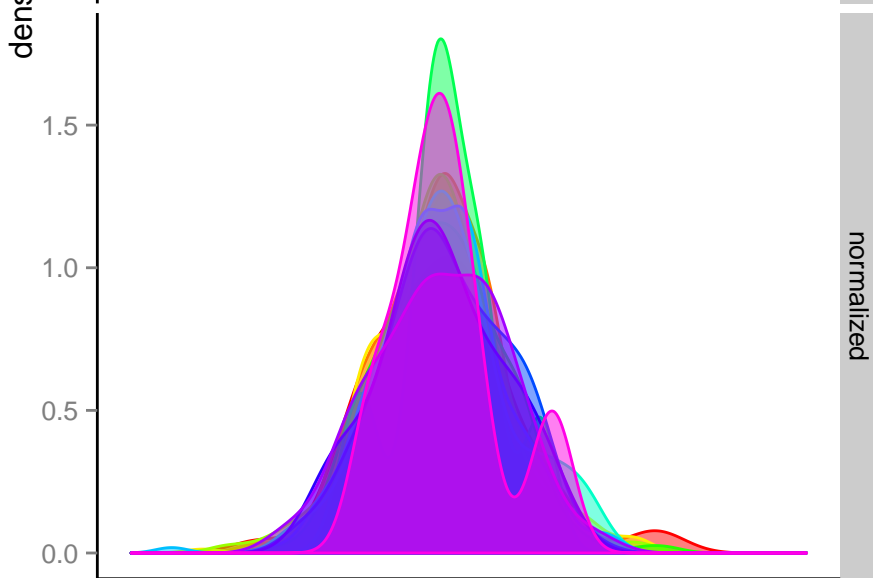

normalized

## PLATFORMRUNDAY\_miss

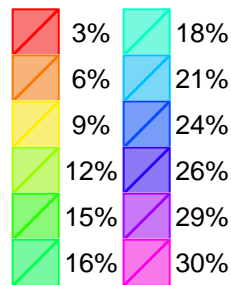

log(ion counts)

# indolepropionate

runday

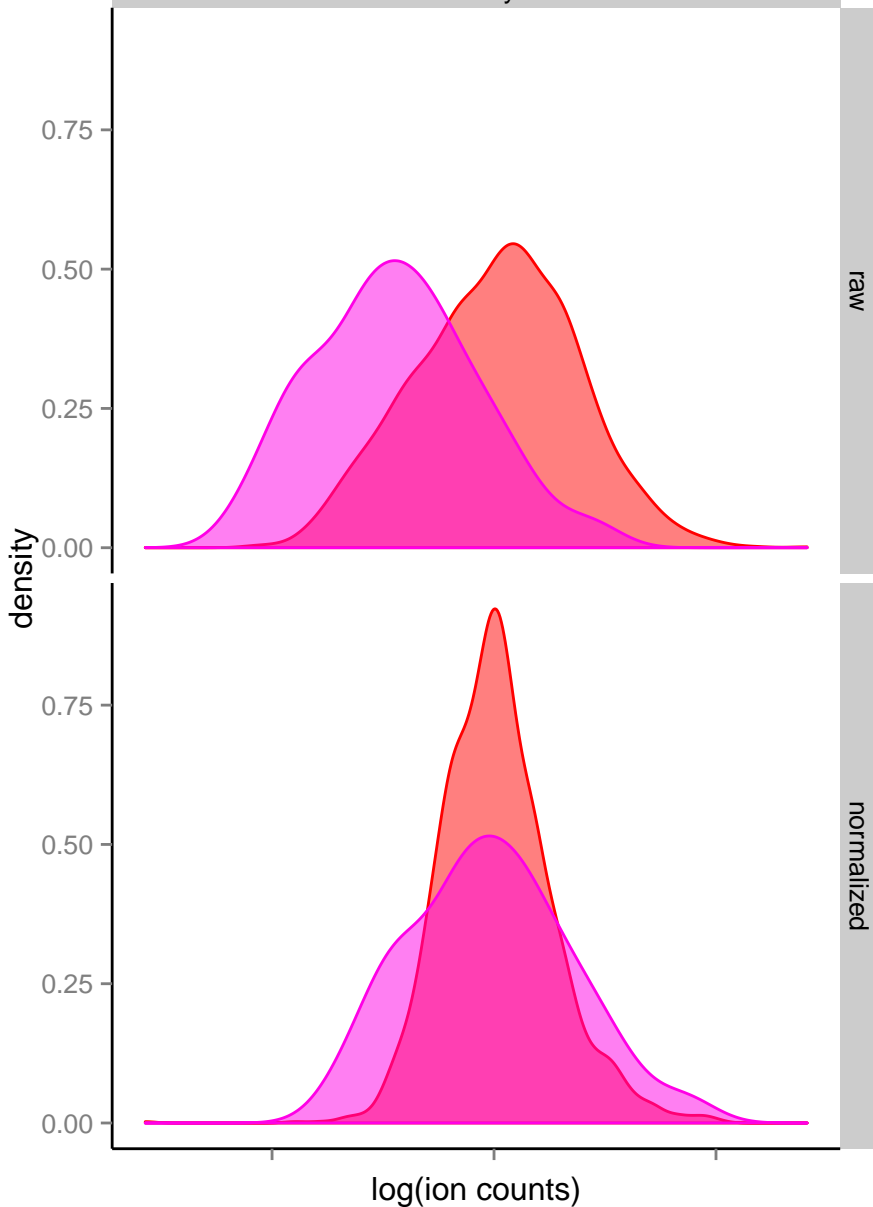

raw

normalized

**PLATFORMRUNDAY\_miss**

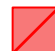

0%

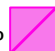

3%

# inosine

runday

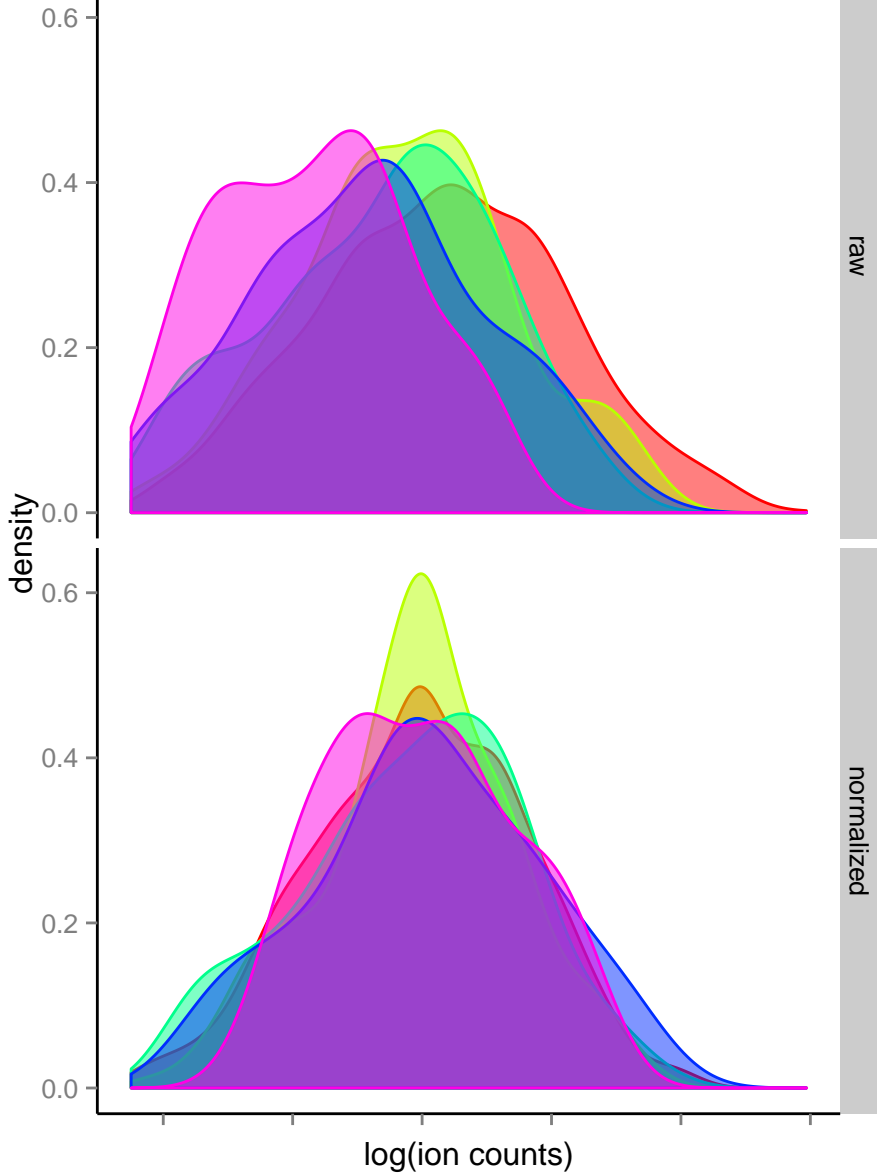

# inositol 1-phosphate (I1P)

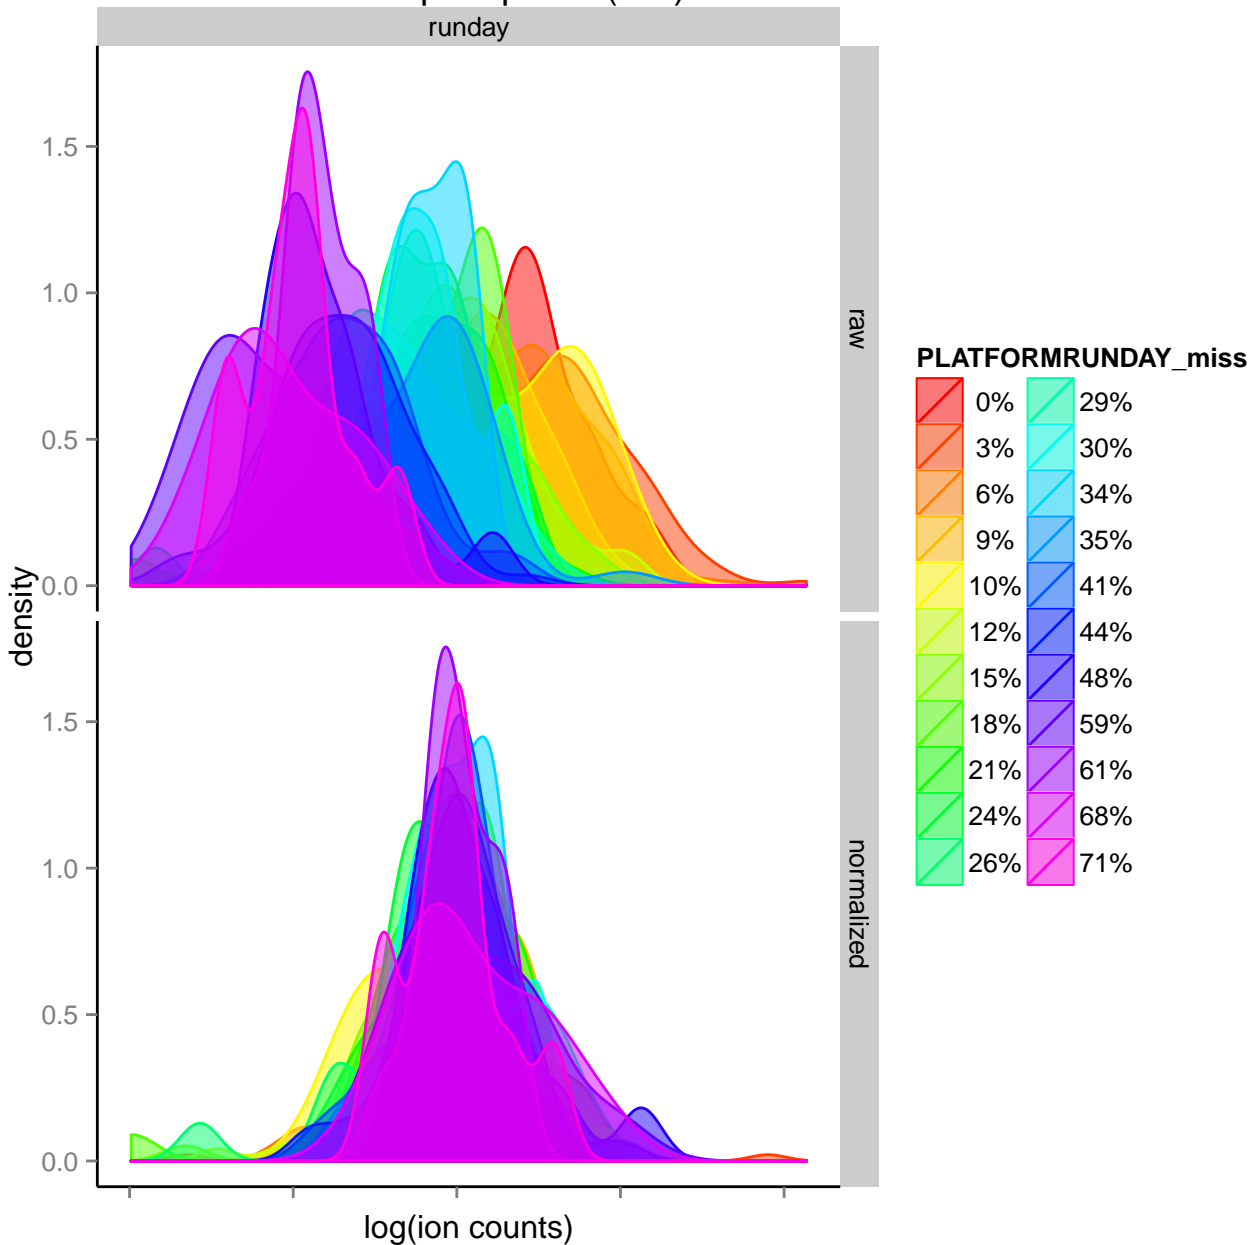

# isobutyrylcarnitine

runday

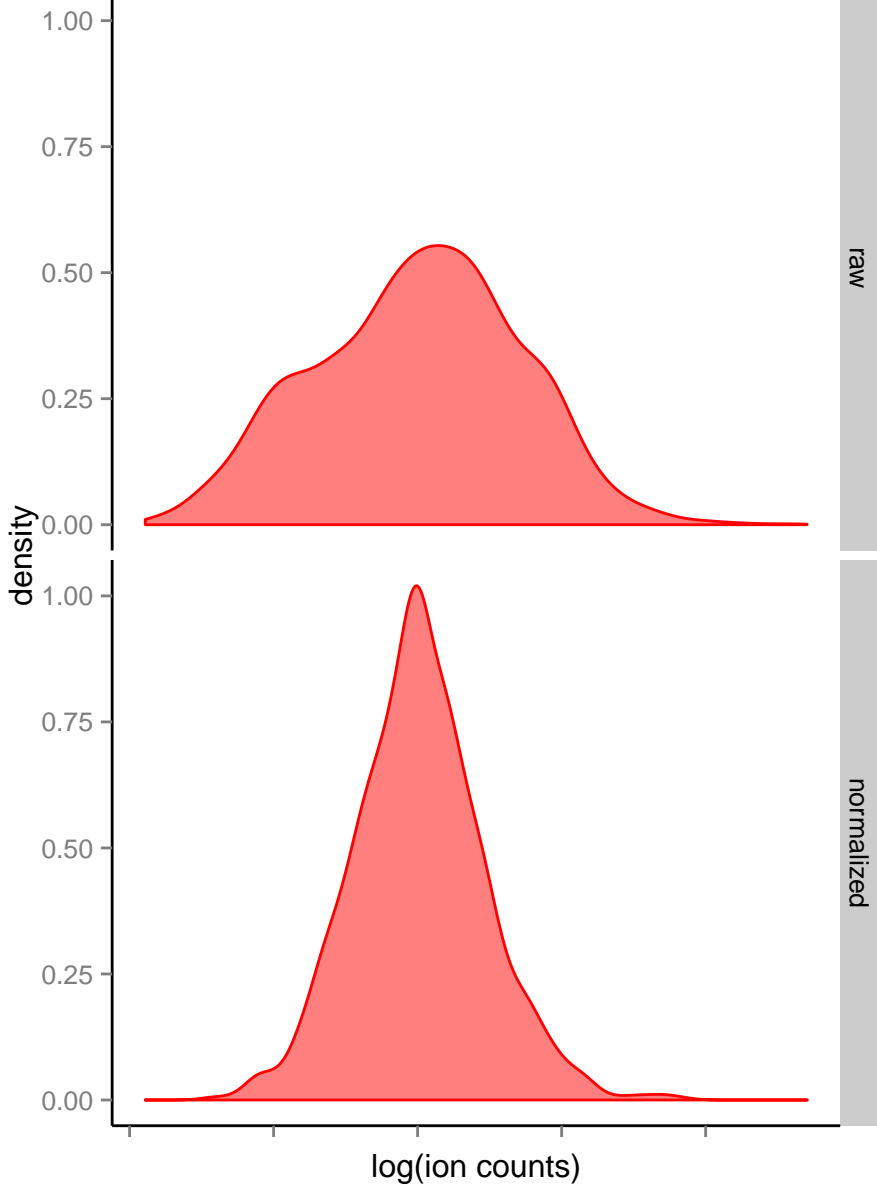

raw

normalized

**PLATFORMRUNDAY\_miss**

0%



# isoleucine

runday

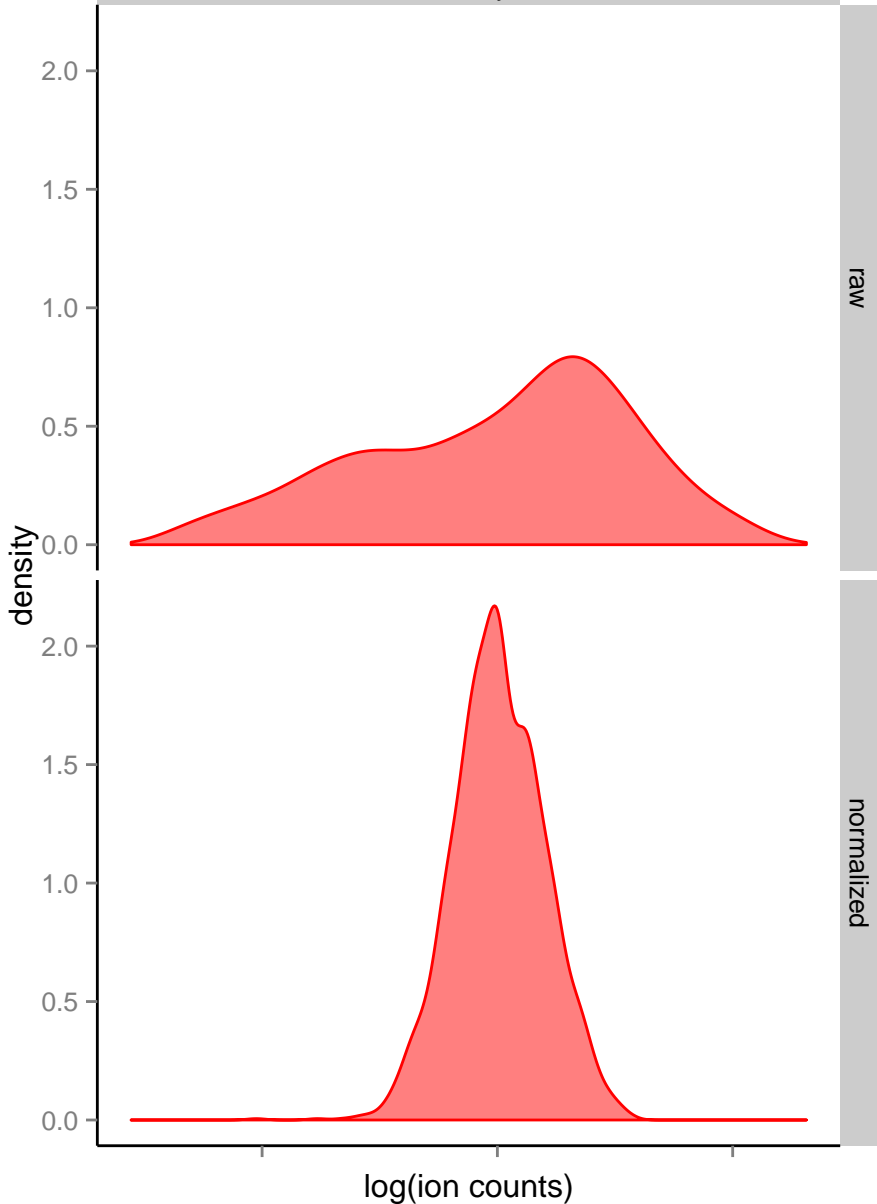

**PLATFORMRUNDAY\_miss**

0%

# isovalerate

runday

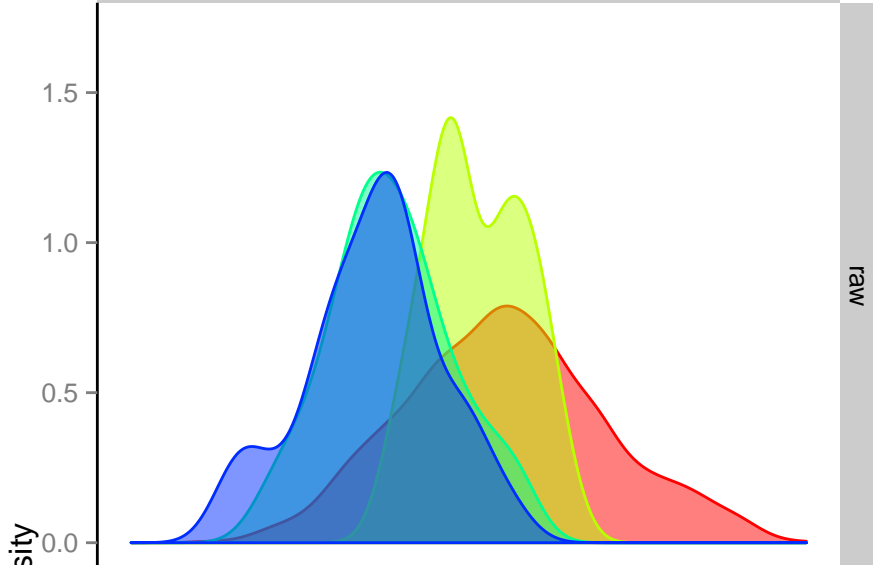

raw

## PLATFORMRUNDAY\_miss

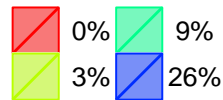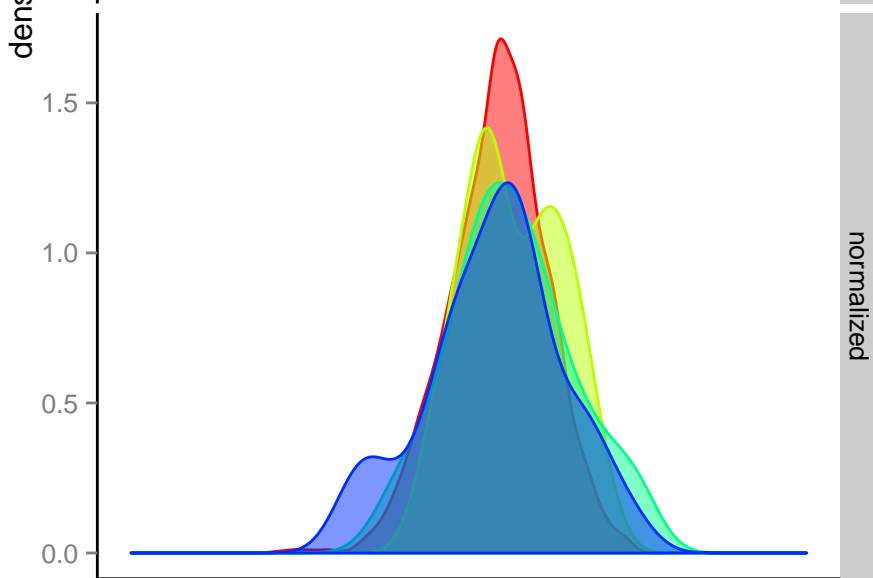

normalized

log(ion counts)

# isovalerylcarnitine

runday

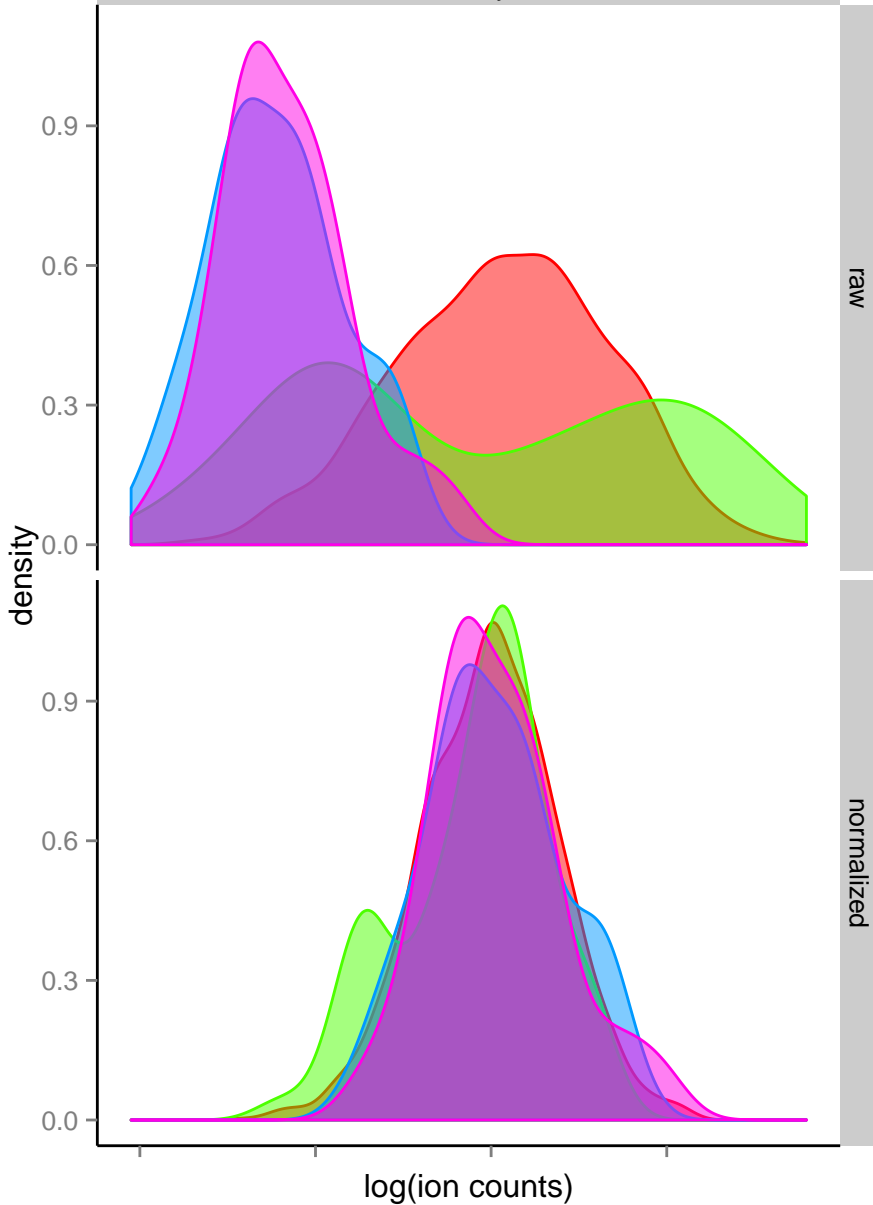

**PLATFORMRUNDAY\_miss**

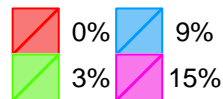

# kynurenine

runday

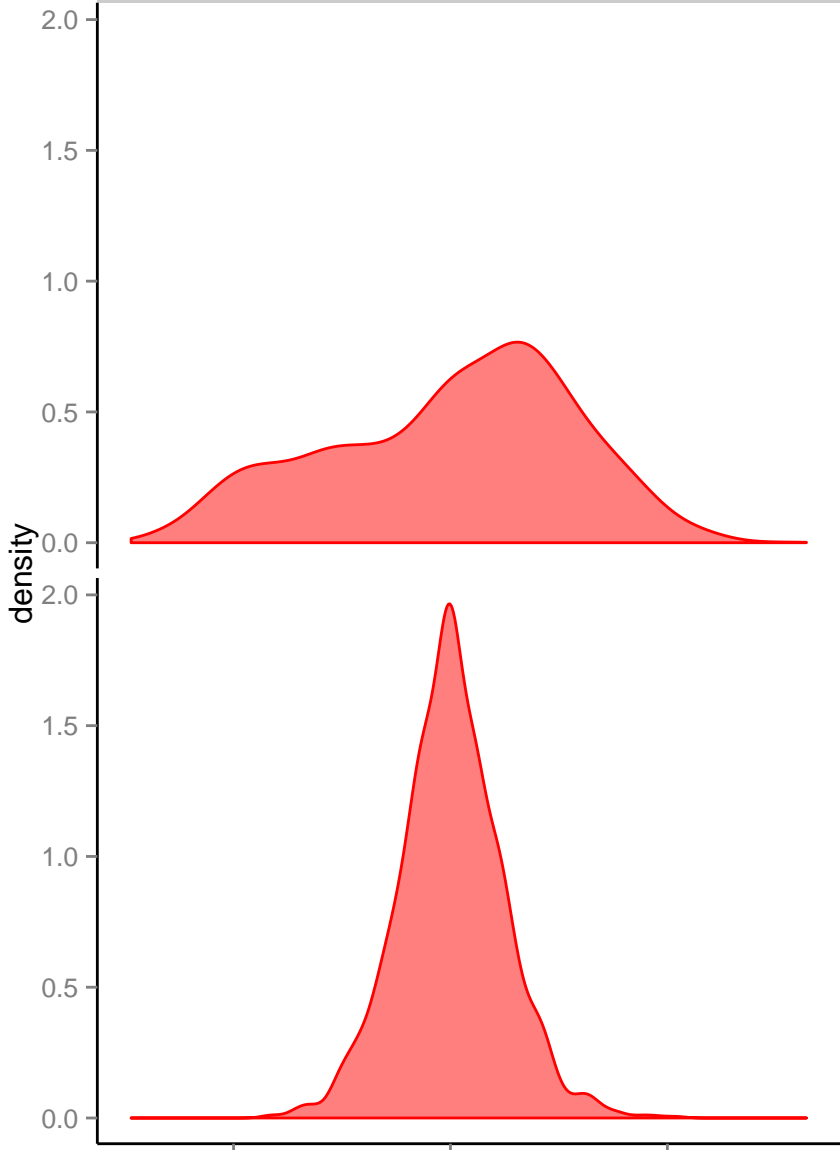

raw

normalized

**PLATFORMRUNDAY\_miss**

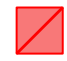

0%

log(ion counts)

# lactate

runday

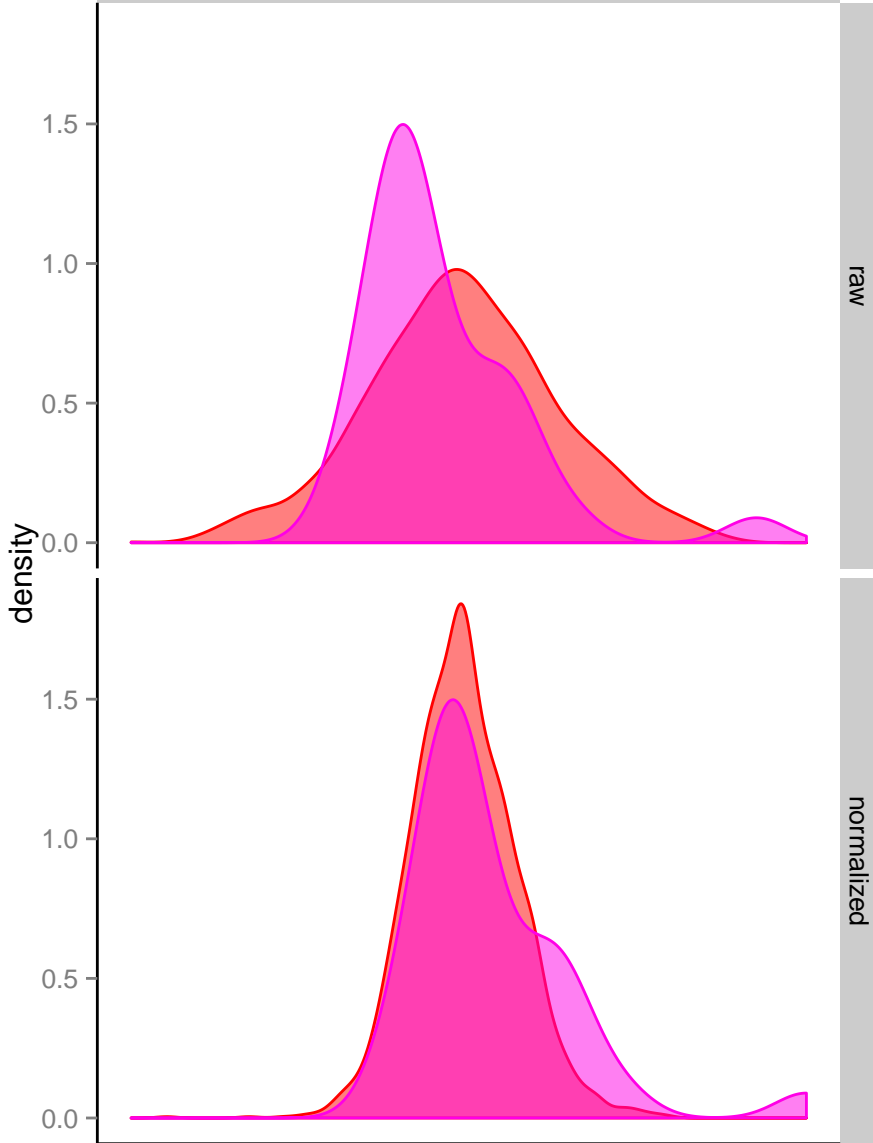

raw

normalized

**PLATFORMRUNDAY\_miss**



0%



3%

log(ion counts)

# lathosterol

runday

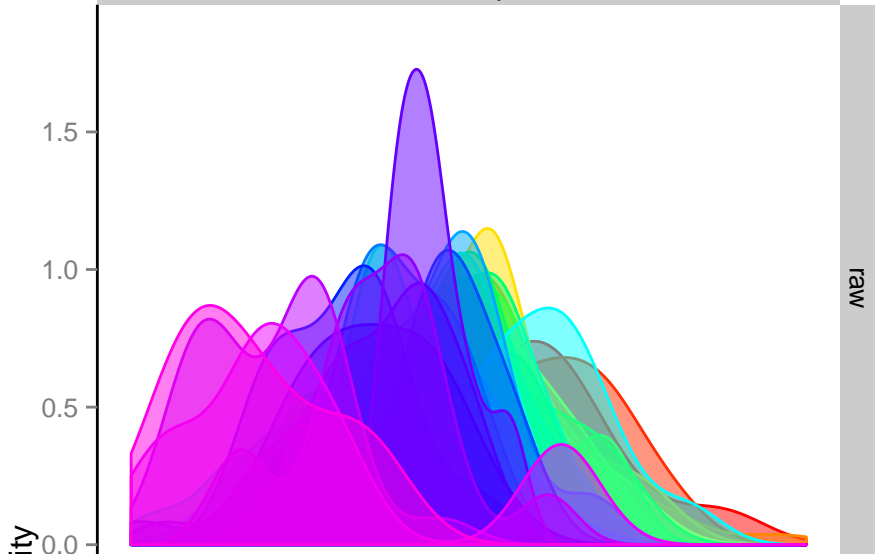

raw

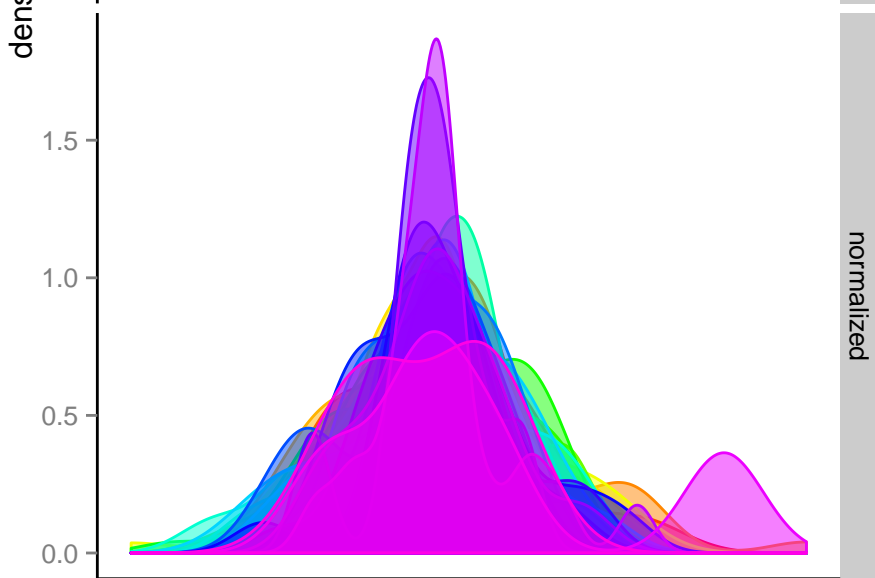

normalized

log(ion counts)

## PLATFORMRUNDAY\_miss

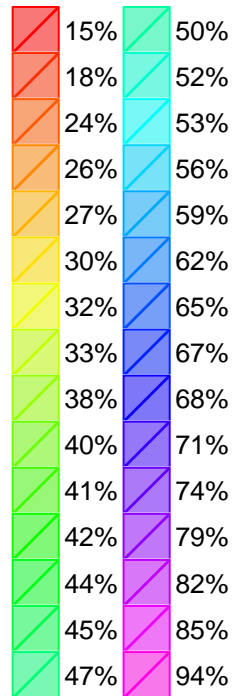

# laurate (12:0)

runday

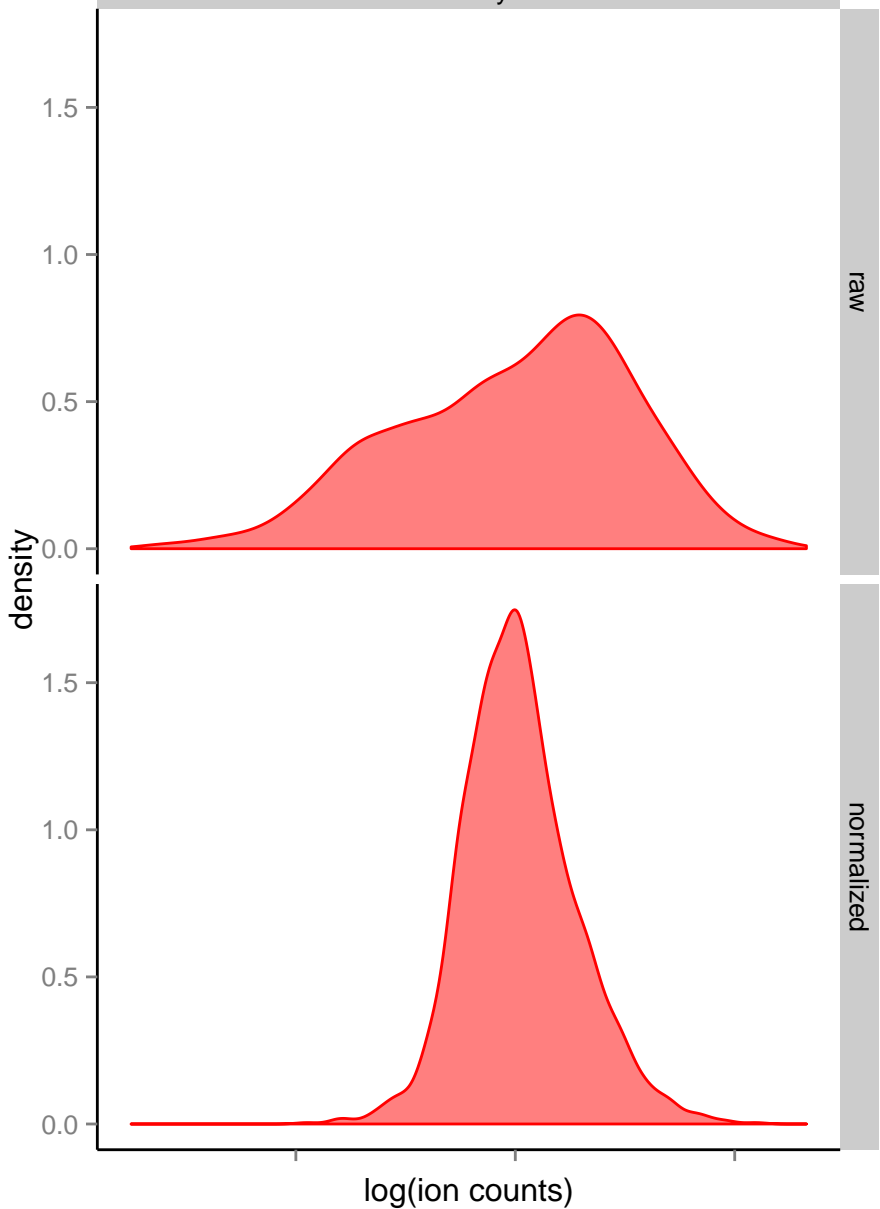

raw

normalized

**PLATFORMRUNDAY\_miss**

0%

# laurylcarnitine

runday

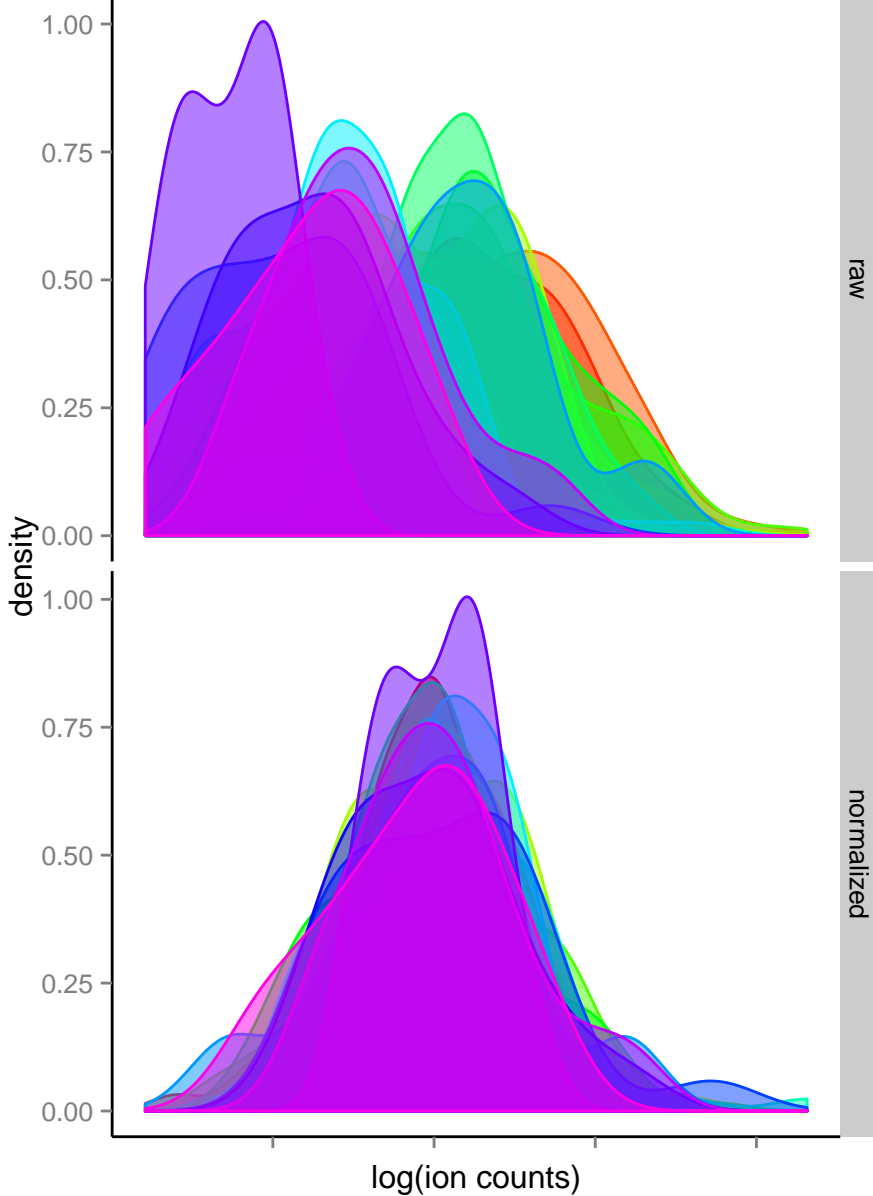

## PLATFORMRUNDAY\_miss

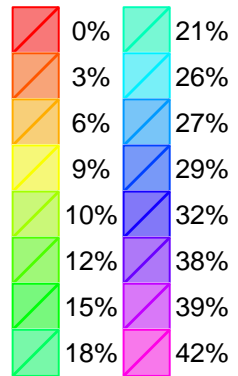



leucine

runday

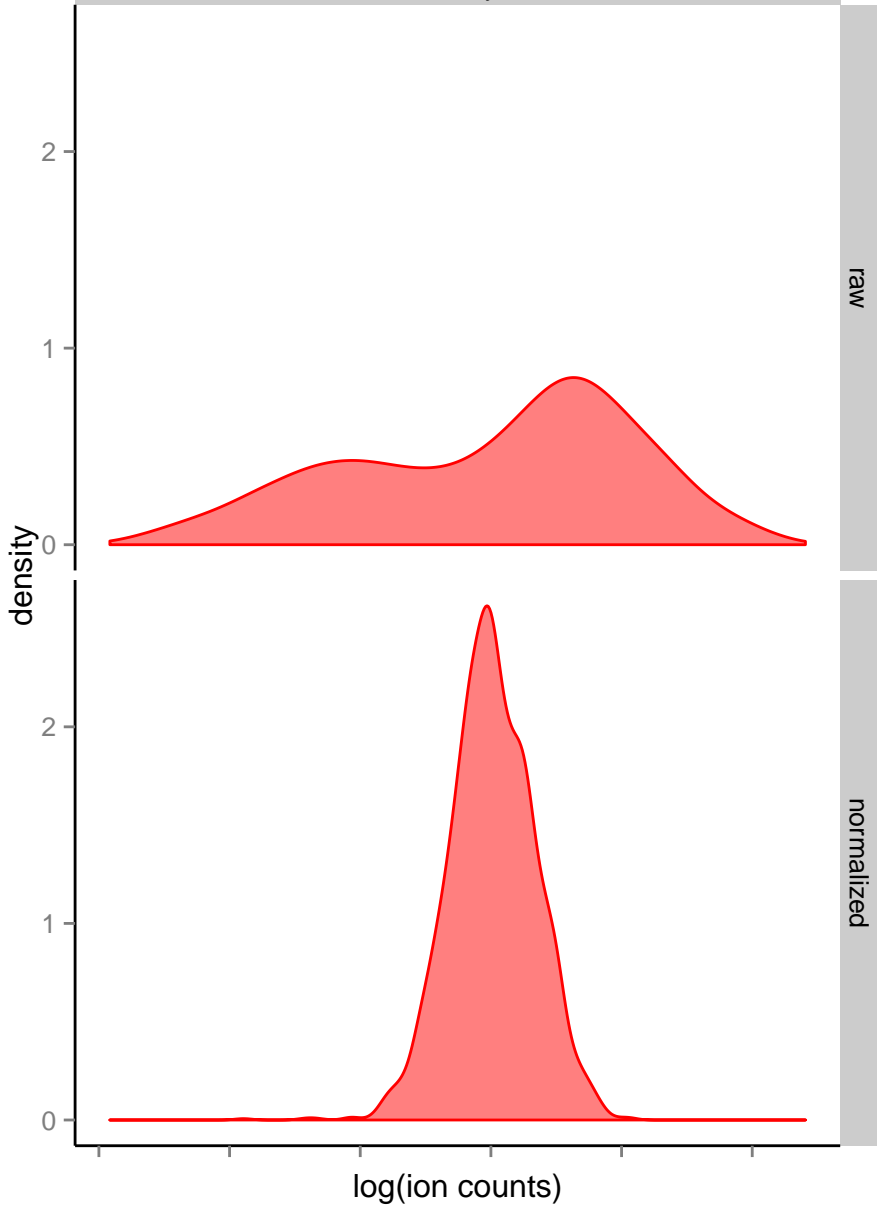

PLATFORMRUNDAY\_miss

0%

# leucylleucine

runday

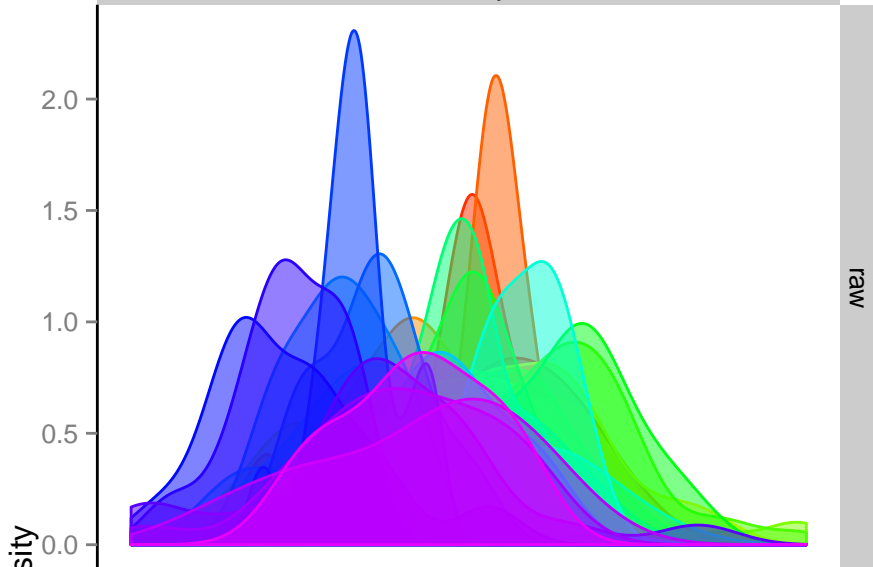

raw

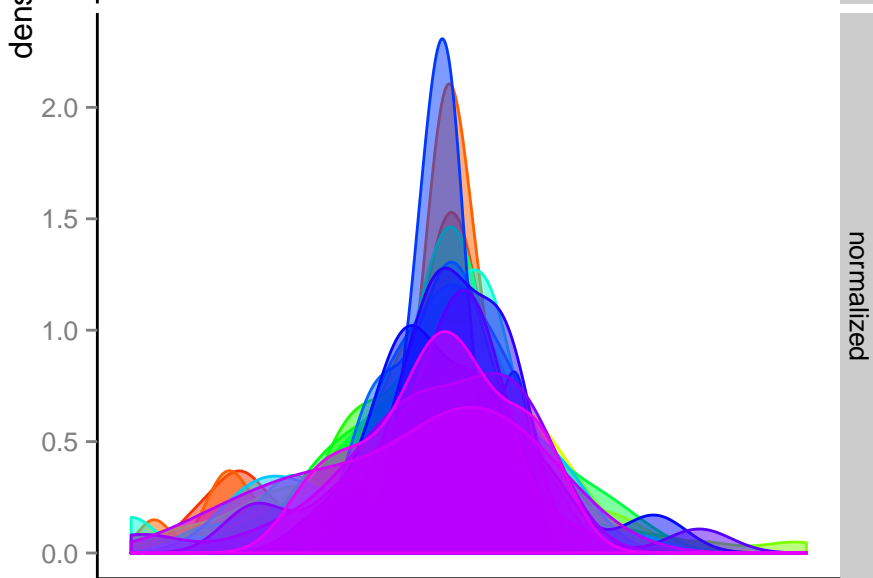

normalized

## PLATFORMRUNDAY\_miss

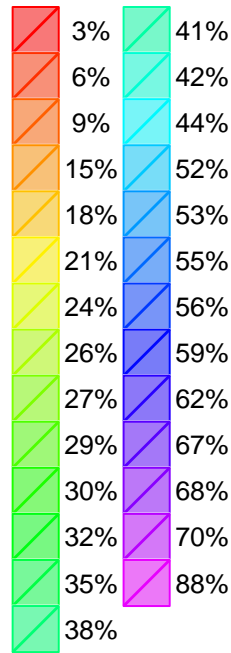

log(ion counts)

# levulinate (4-oxovalerate)

runday

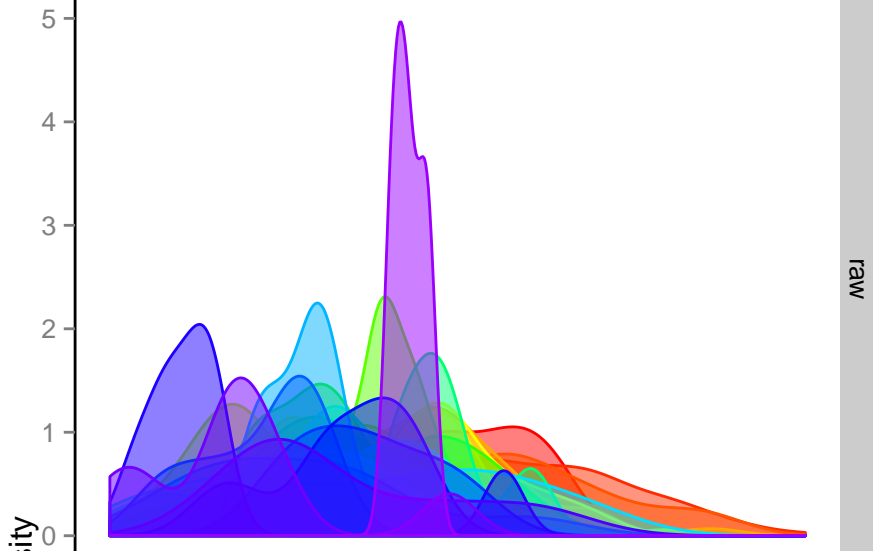

raw

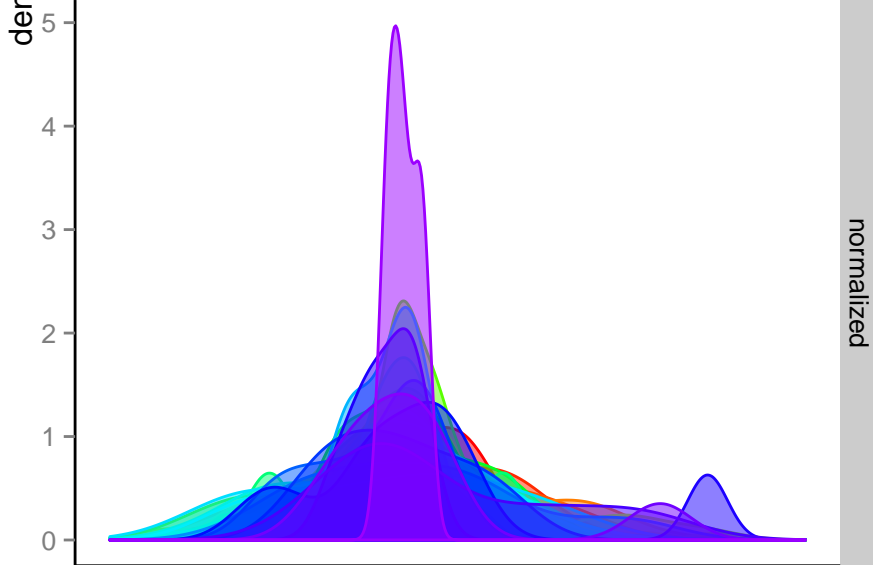

normalized

log(ion counts)

## PLATFORMRUNDAY\_miss

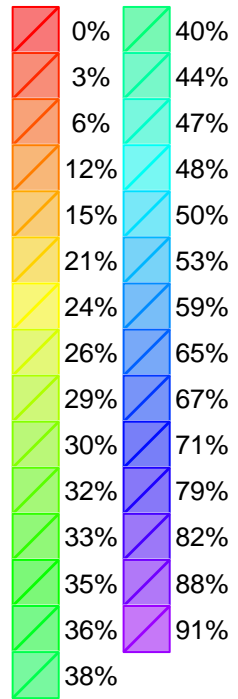

# linoleamide (18:2n6)

runday

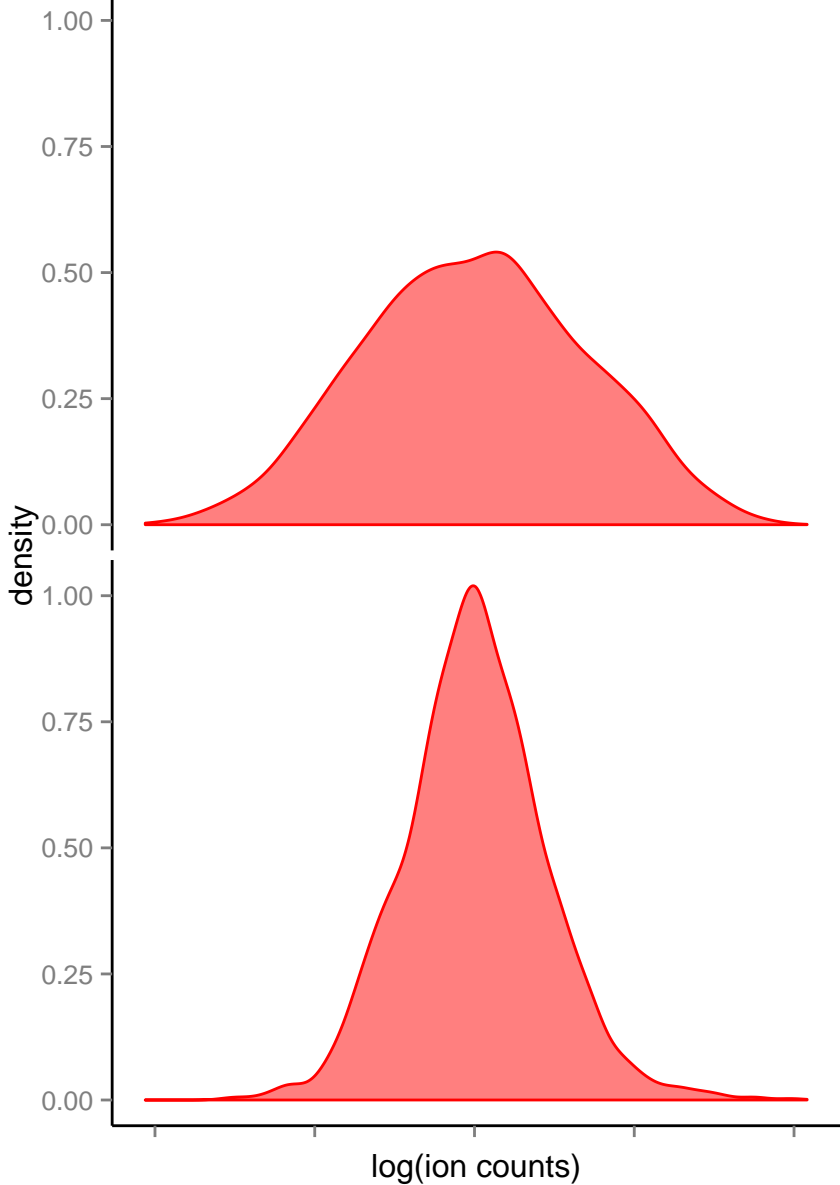

raw

normalized

**PLATFORMRUNDAY\_miss**

0%

# linoleate (18:2n6)

runday

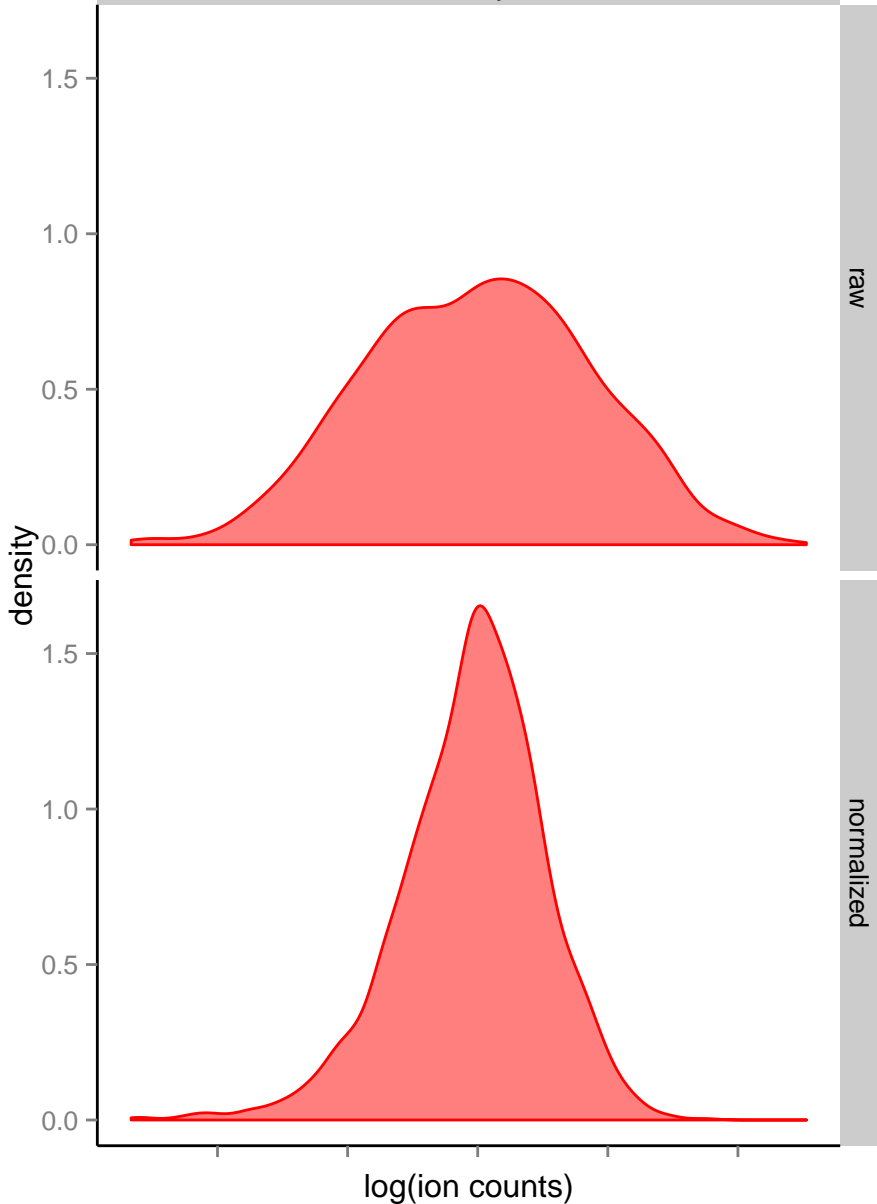

**PLATFORMRUNDAY\_miss**

0%

# linolenate [alpha or gamma; (18:3n3 or 6)]

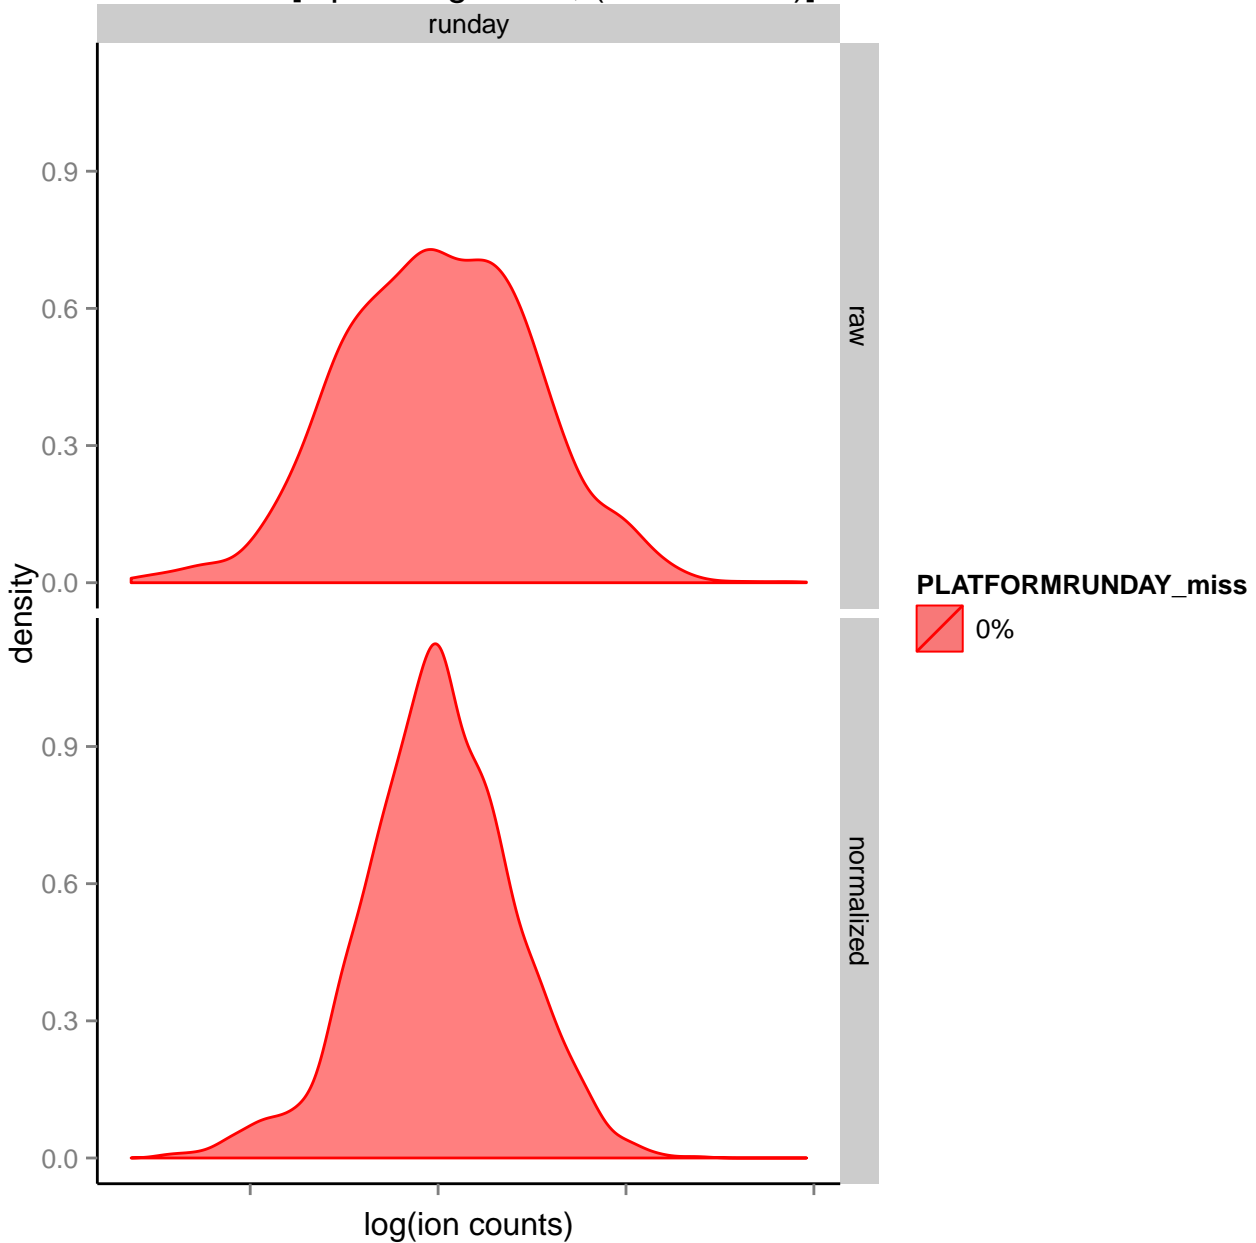

lysine

runday

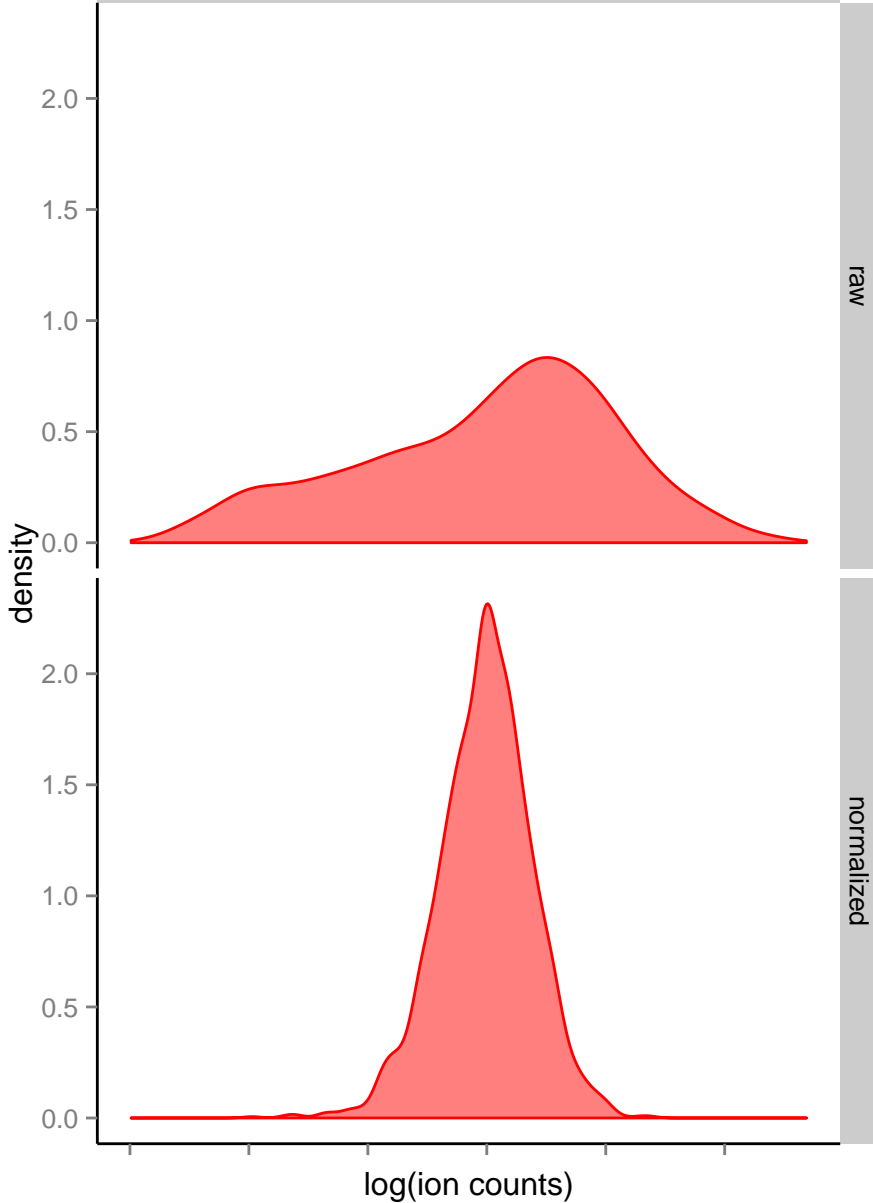

PLATFORMRUNDAY\_miss

0%

malate

runday

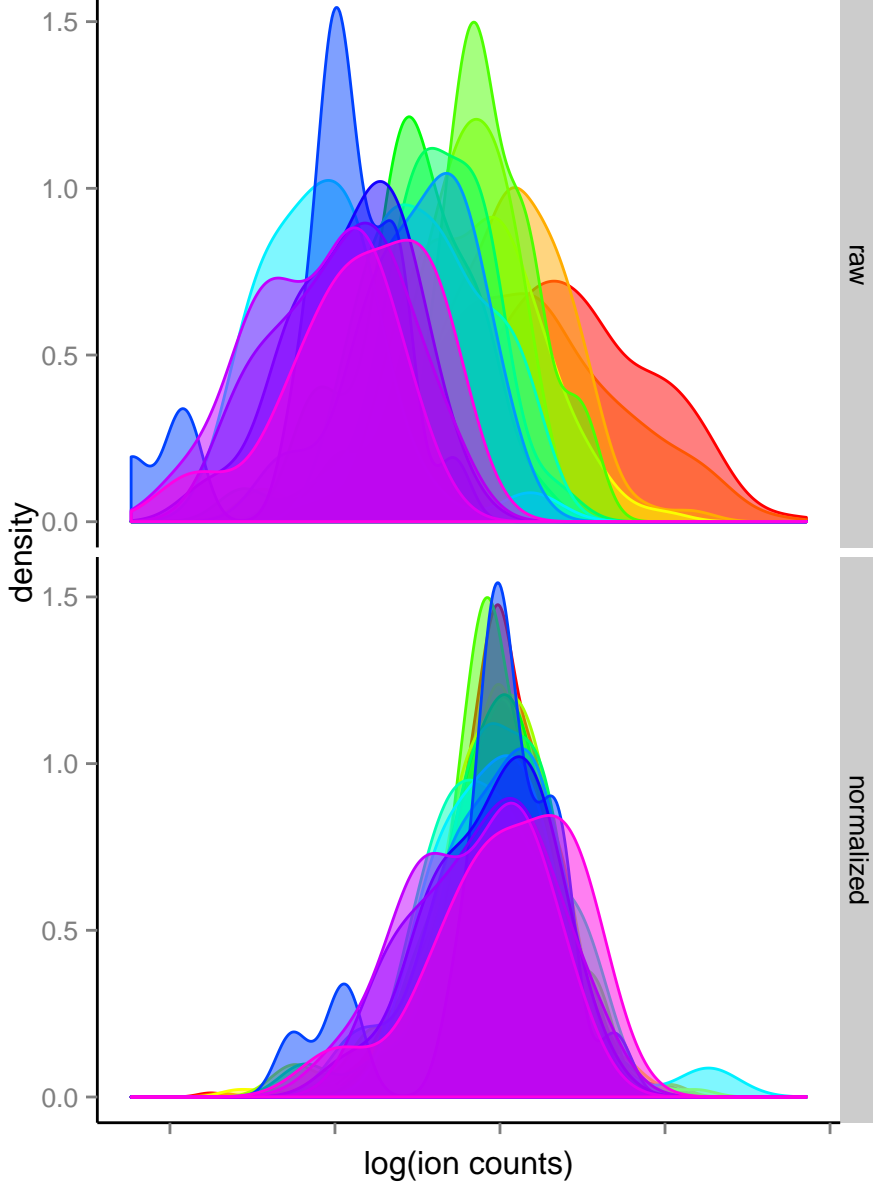

raw

normalized

**PLATFORMRUNDAY\_miss**

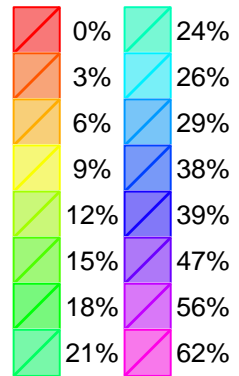



# mannitol

runday

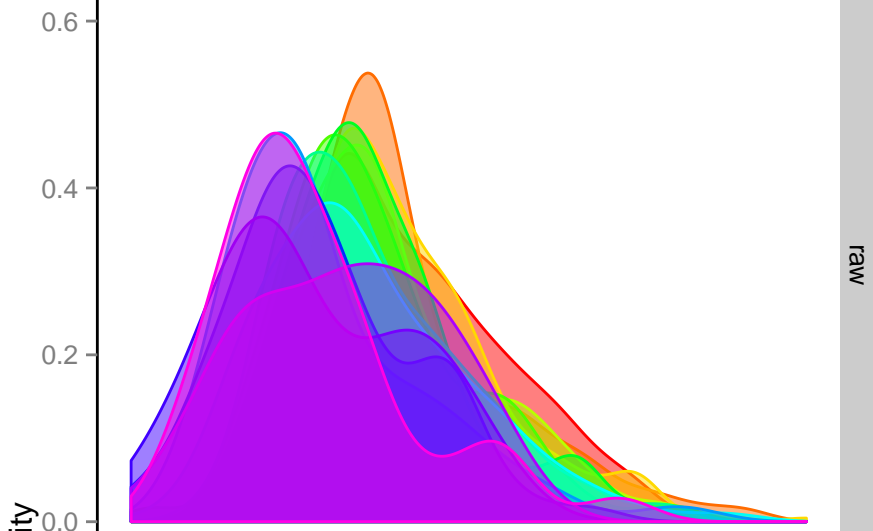

raw

## PLATFORMRUNDAY\_miss

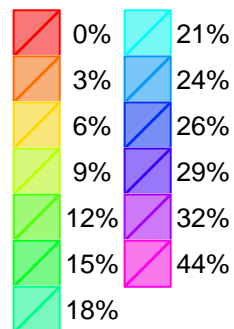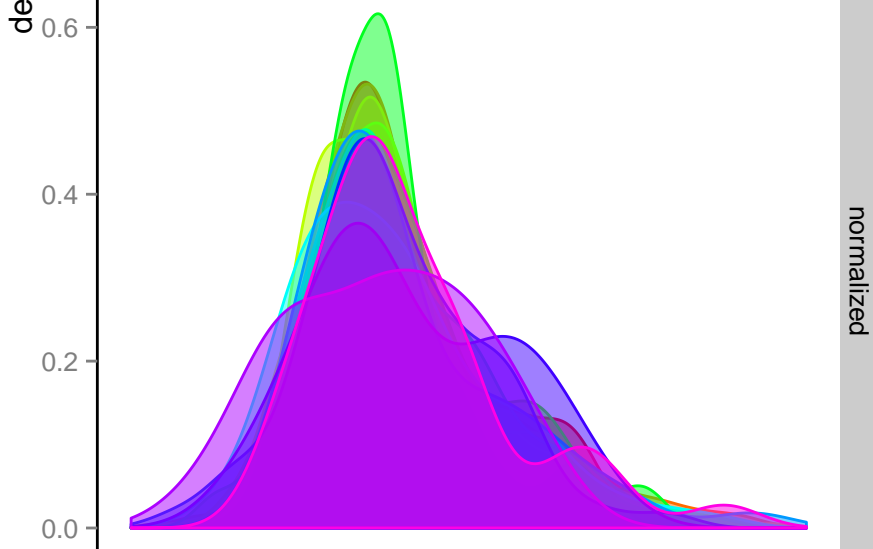

normalized

log(ion counts)

# mannose

runday

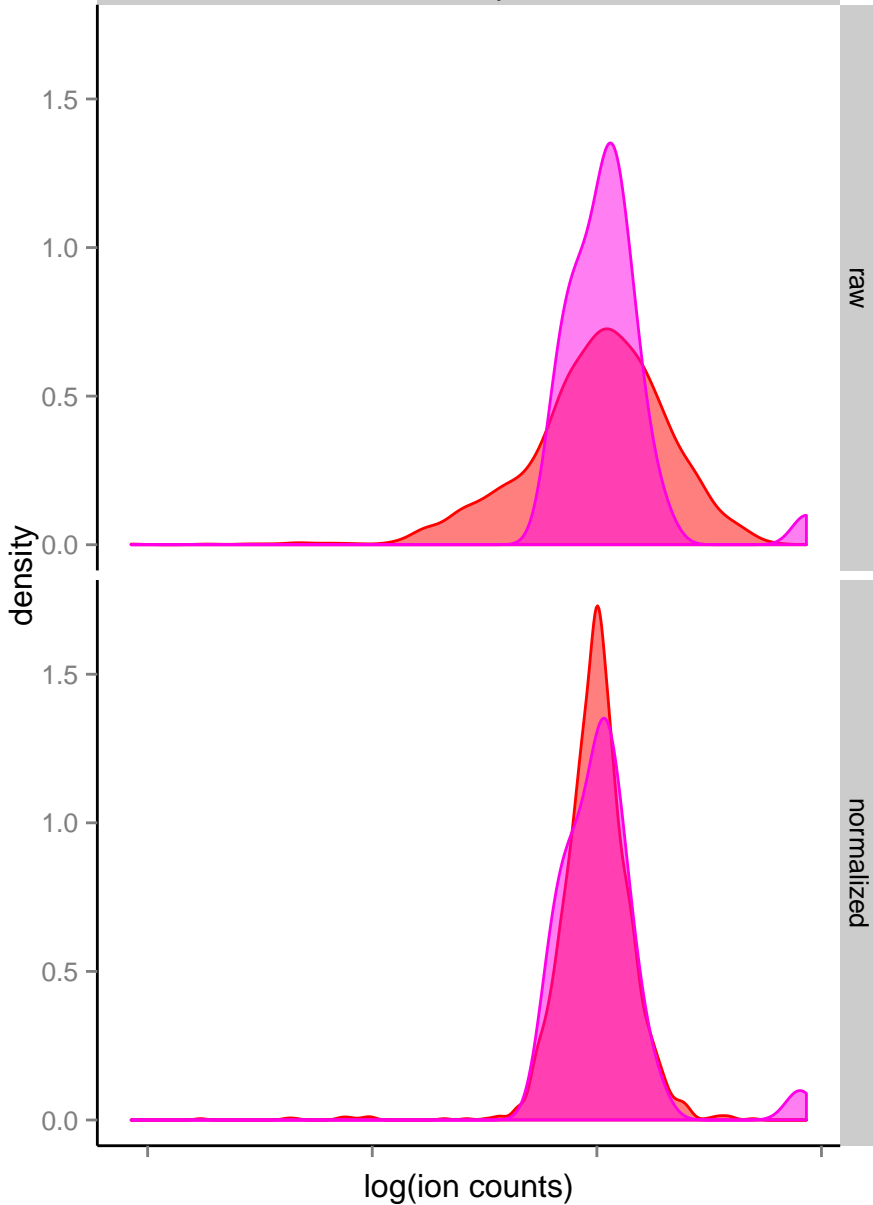

raw

normalized

**PLATFORMRUNDAY\_miss**



0%



3%

log(ion counts)

# margarate (17:0)

runday

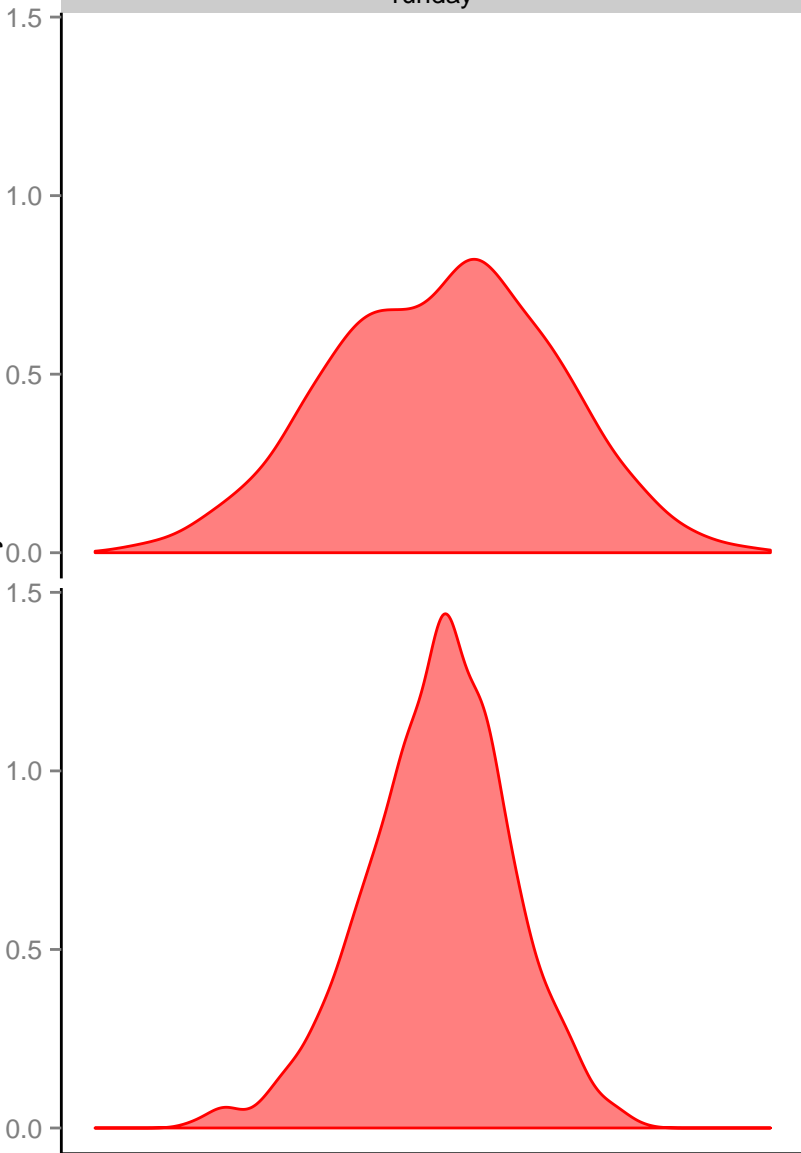

raw

normalized

**PLATFORMRUNDAY\_miss**

0%

# methionine

runday

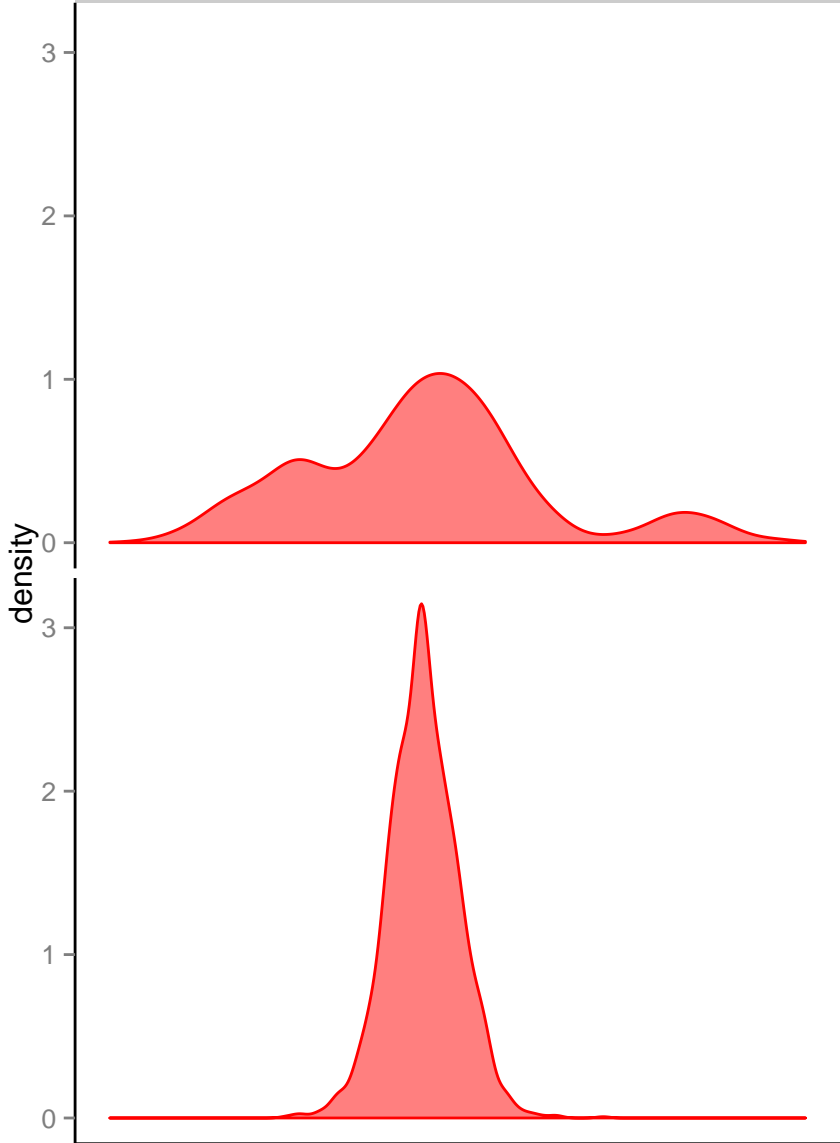

raw

normalized

**PLATFORMRUNDAY\_miss**

0%

# metoprolol

runday

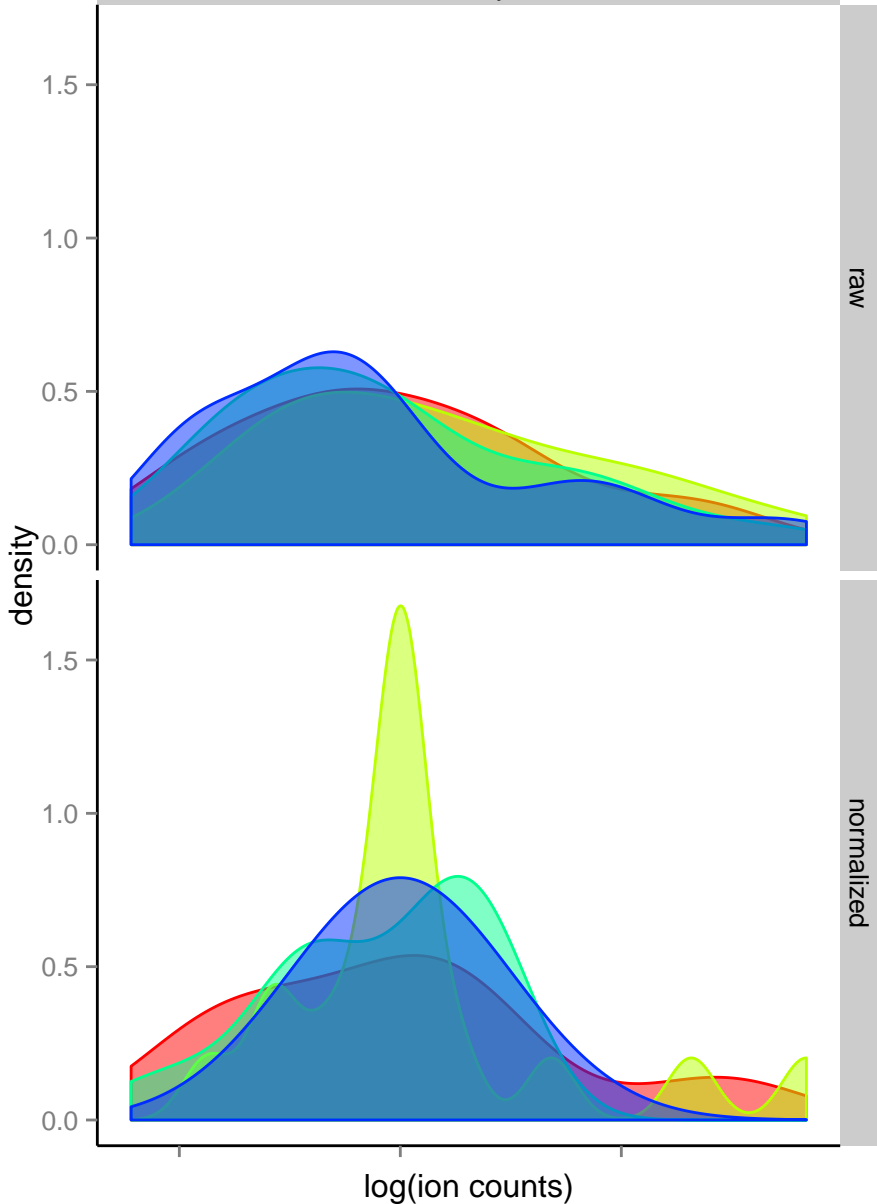

# metoprolol acid metabolite\*

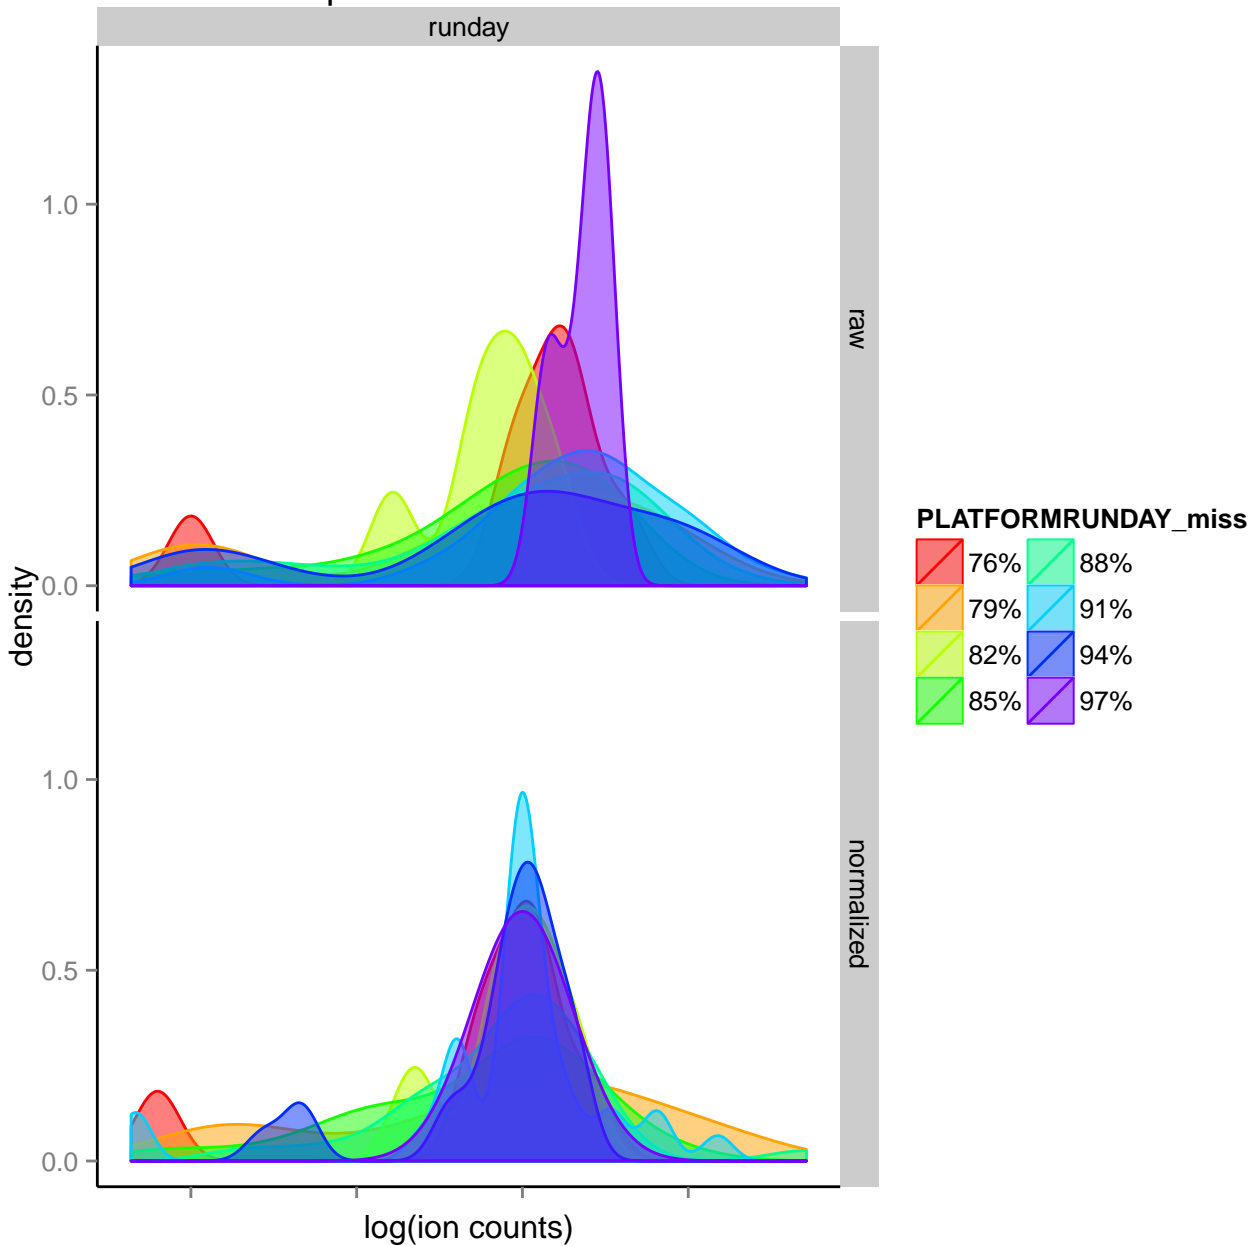

# myo-inositol

runday

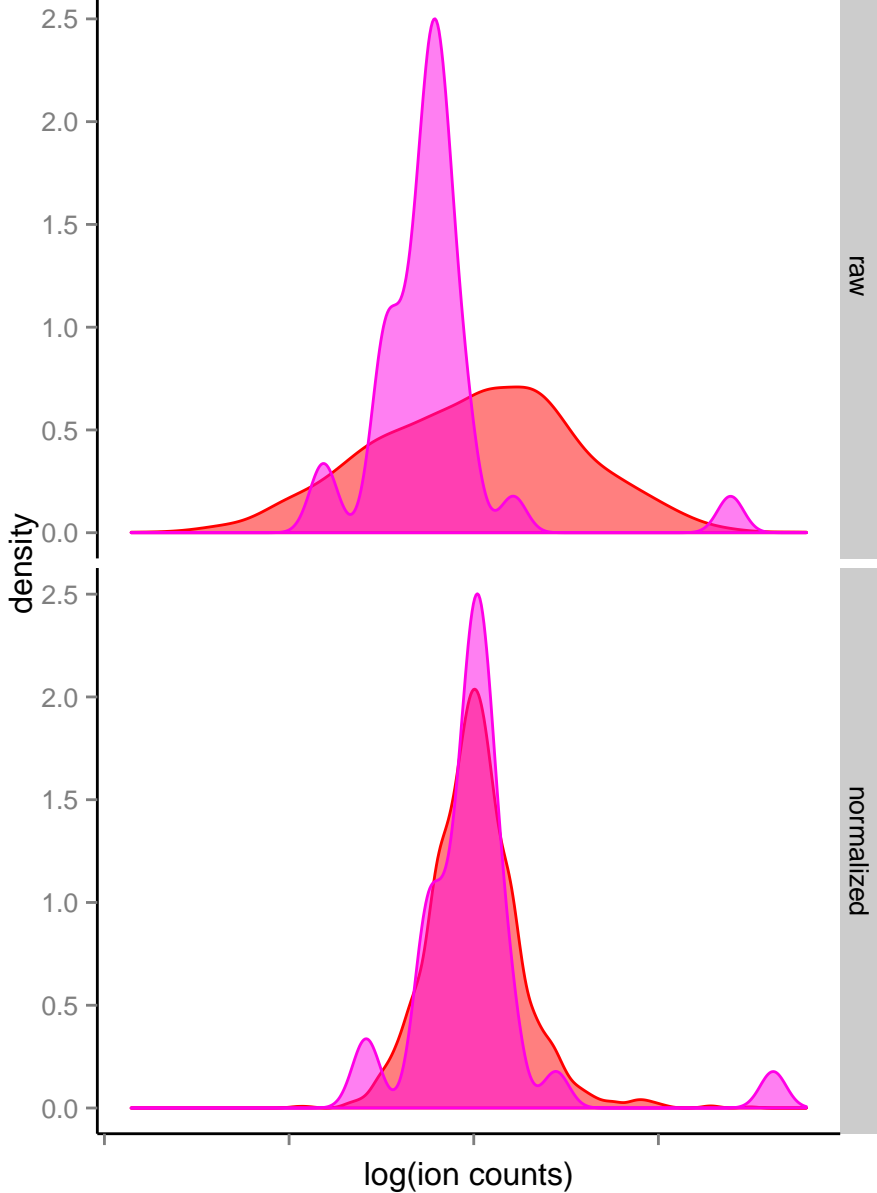

# myristate (14:0)

runday

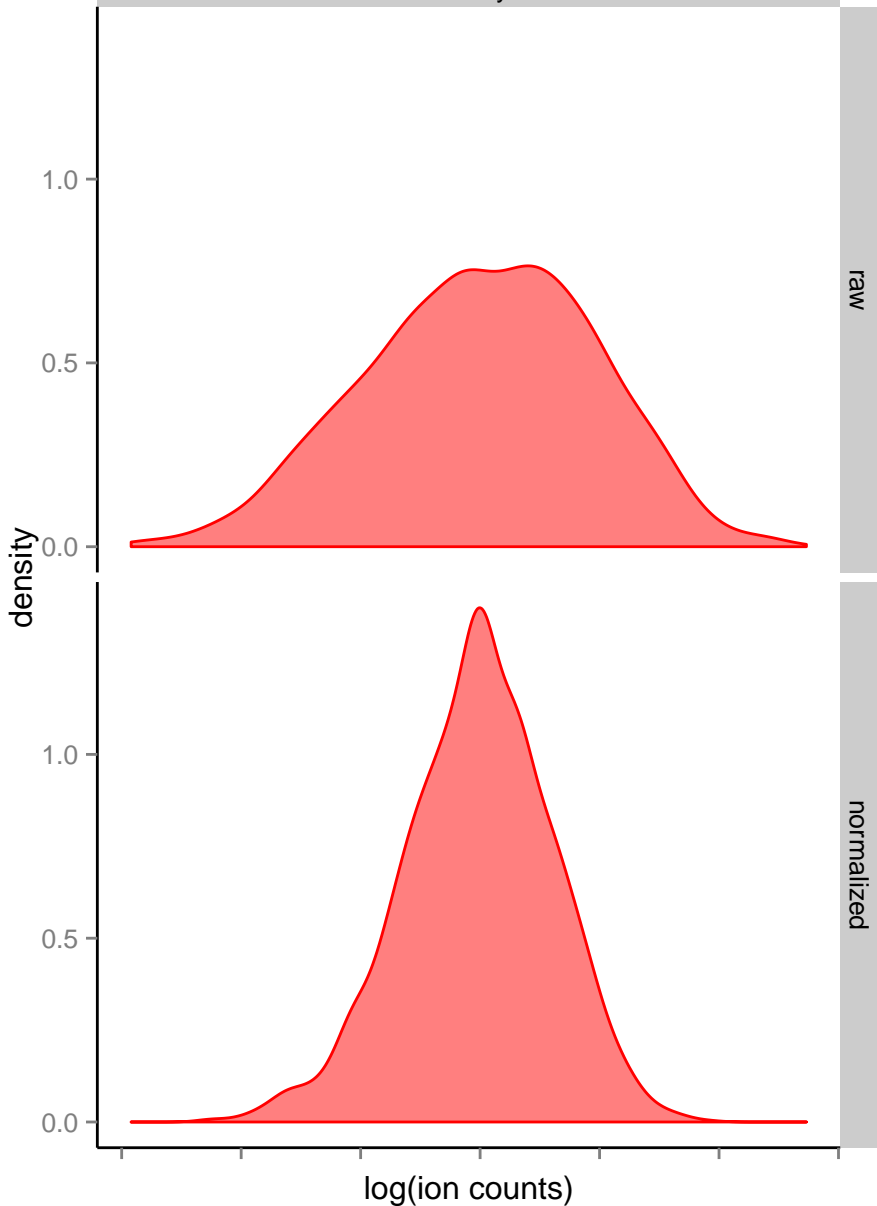

**PLATFORMRUNDAY\_miss**

0%



# myristoleate (14:1n5)

runday

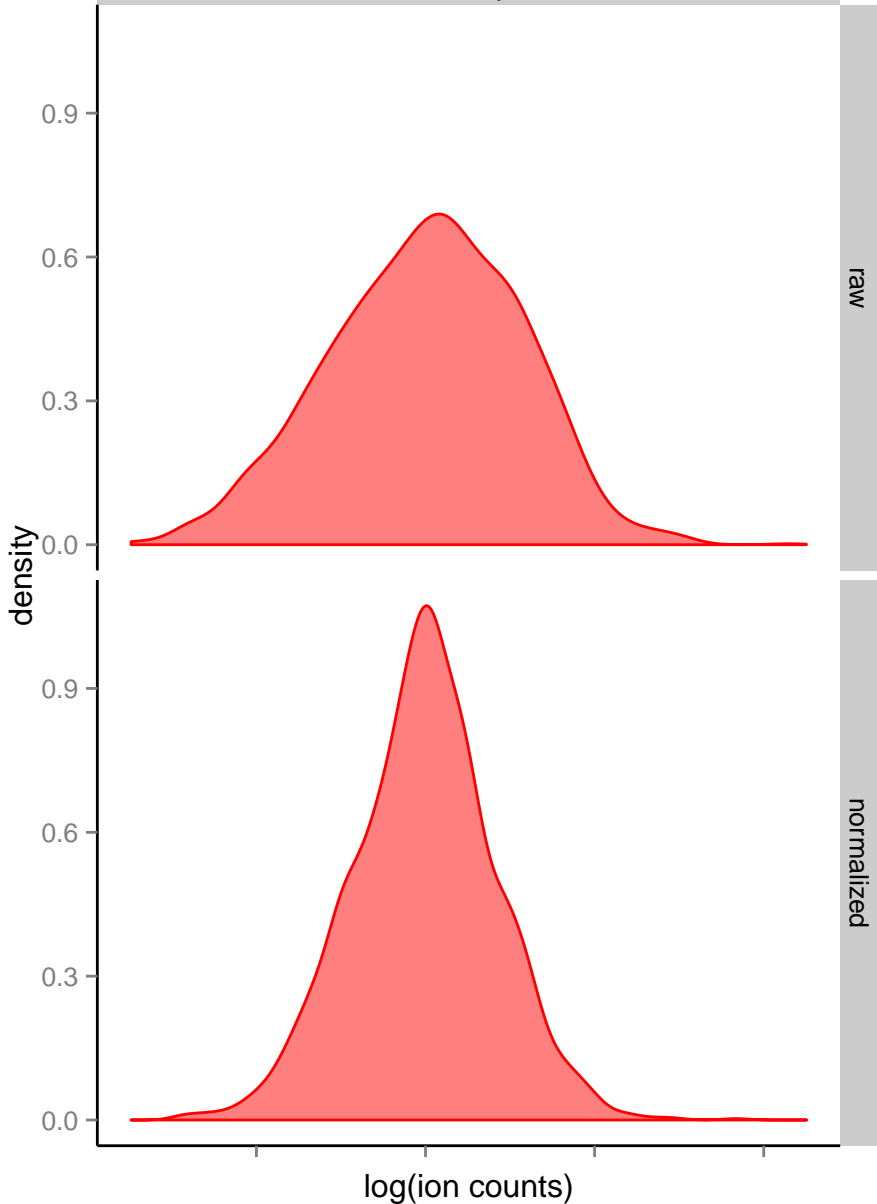

raw

normalized

**PLATFORMRUNDAY\_miss**

0%

# N-(2-furoyl)glycine

runday

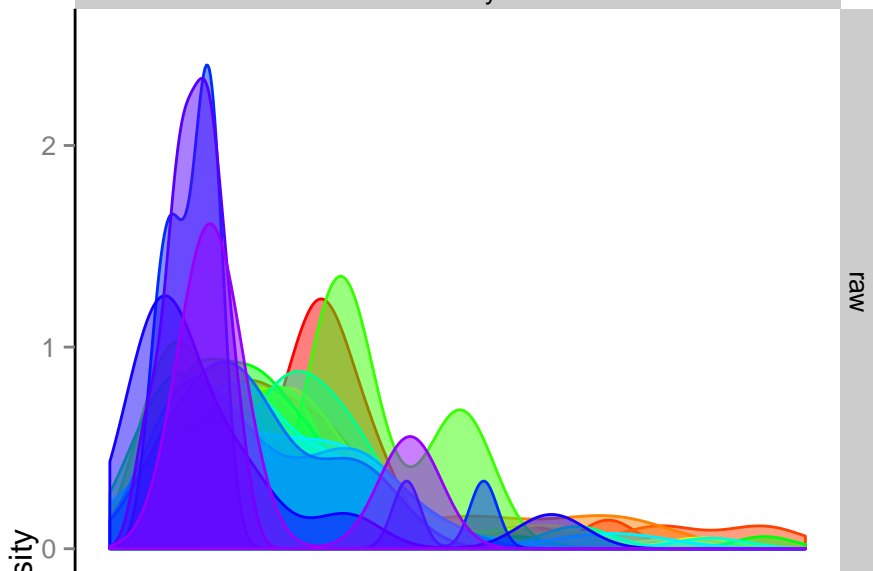

raw

## PLATFORMRUNDAY\_miss

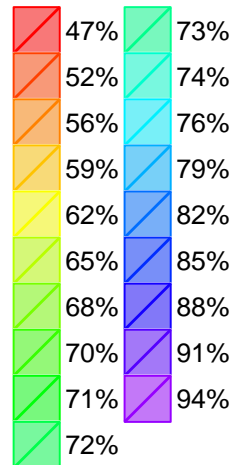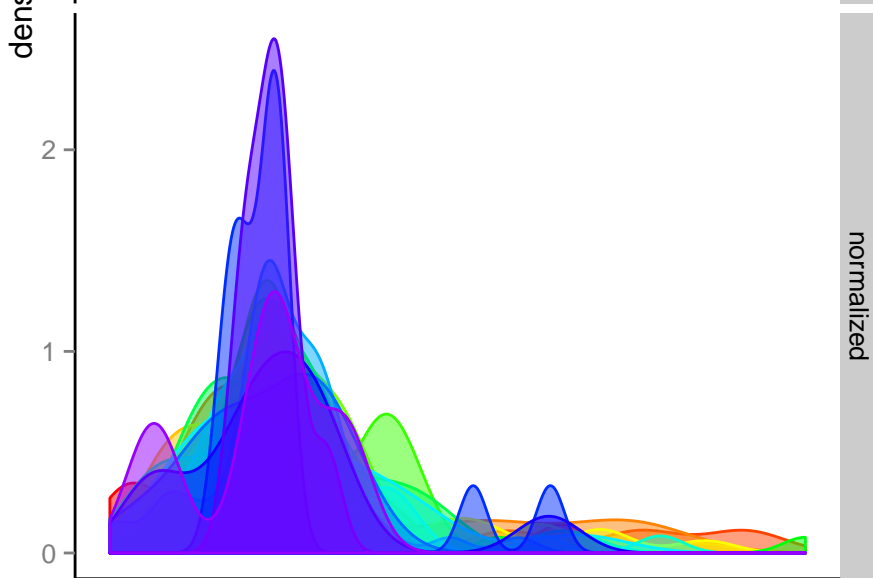

normalized

log(ion counts)

# N-acetylalanine

runday

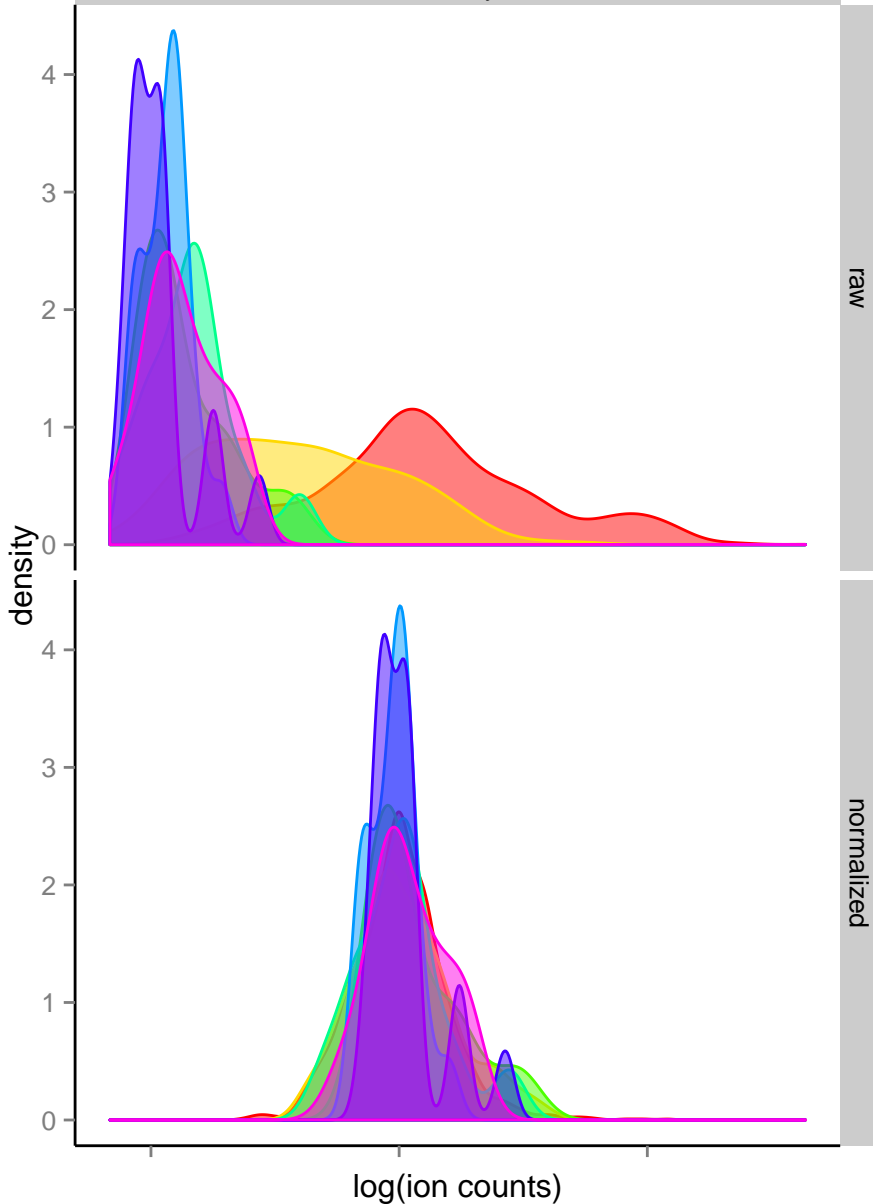

raw

normalized

## PLATFORMRUNDAY\_miss

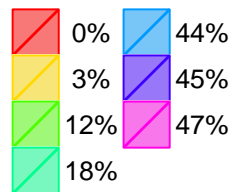

log(ion counts)

# N-acetylglycine

runday

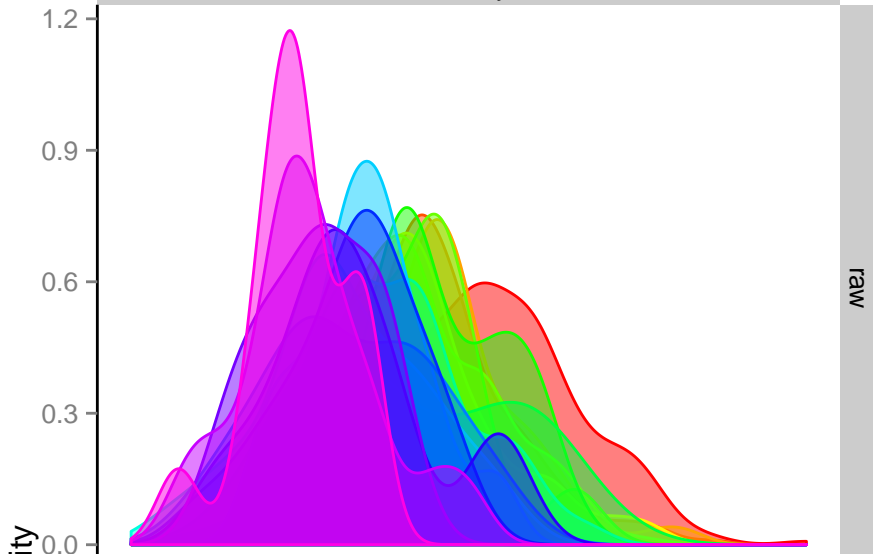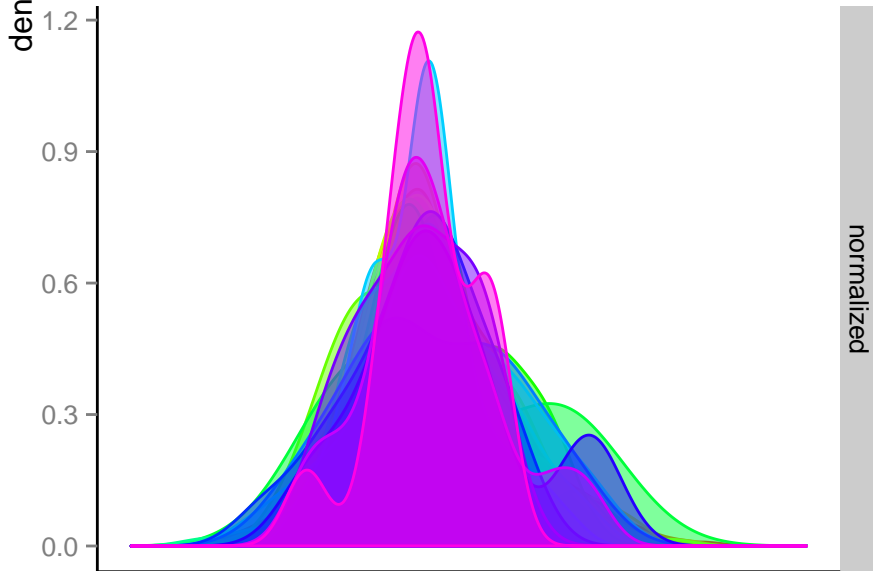

**PLATFORMRUNDAY\_miss**

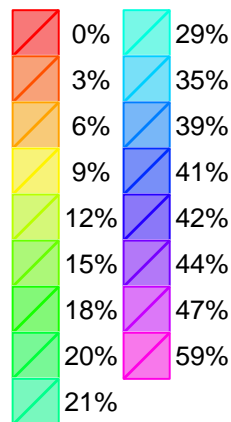

log(ion counts)

# N-acetylornithine

runday

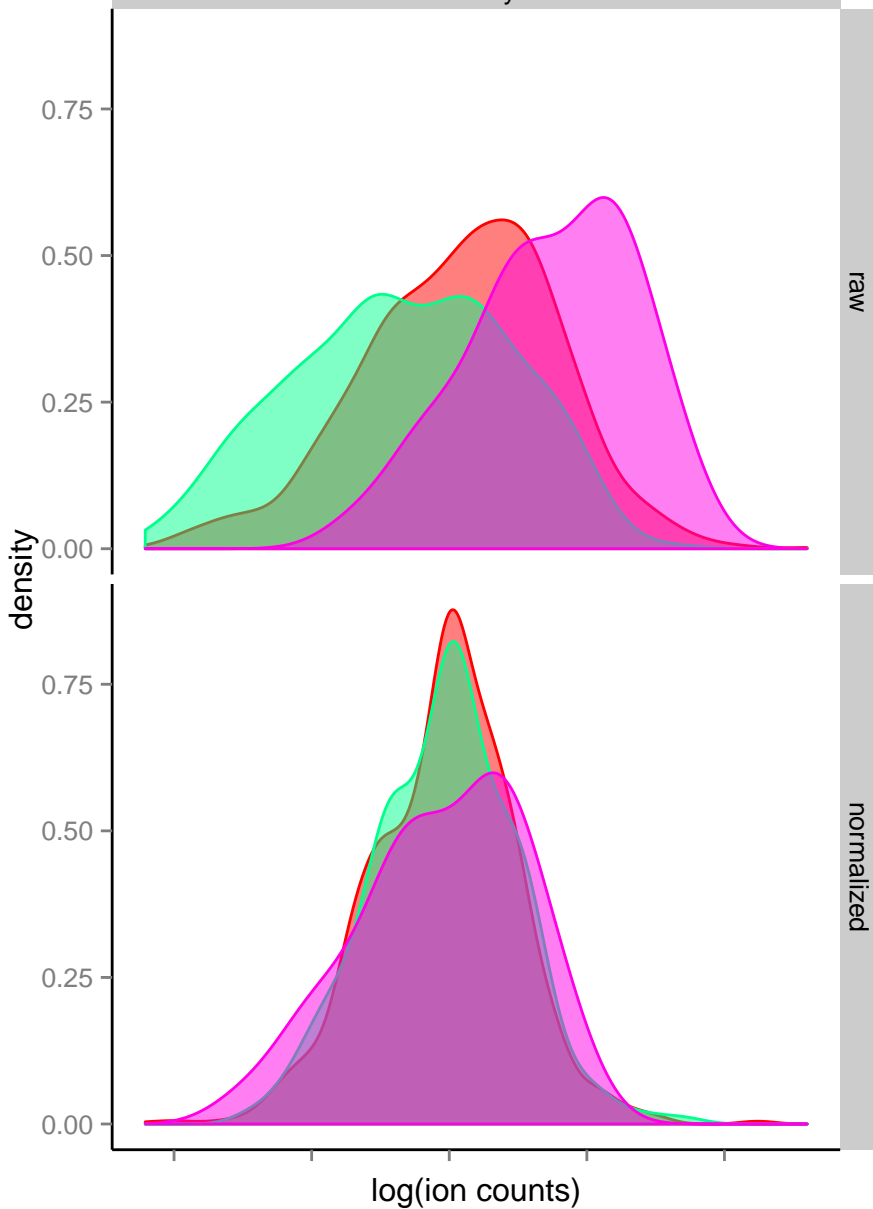

raw

normalized

**PLATFORMRUNDAY\_miss**



log(ion counts)

# N-acetylthreonine

runday

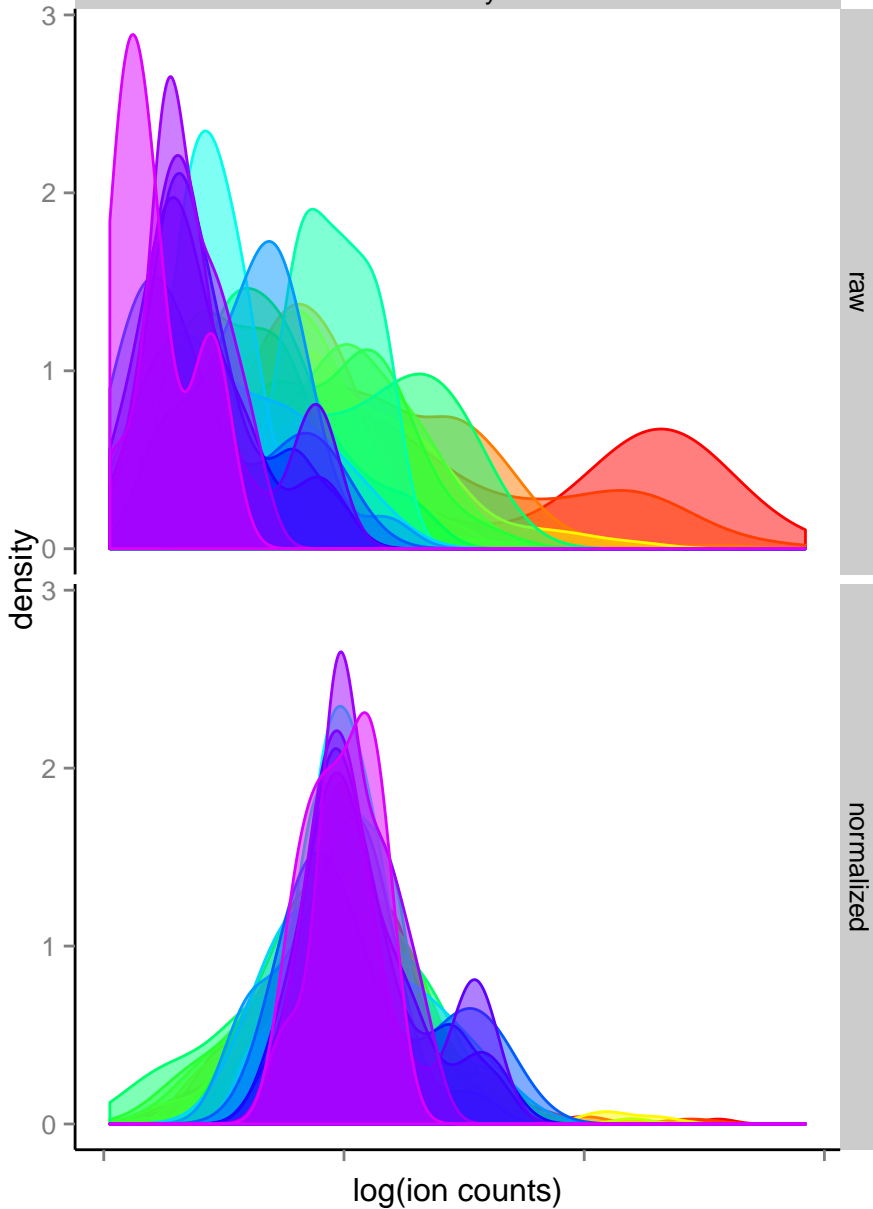

## PLATFORMRUNDAY\_miss

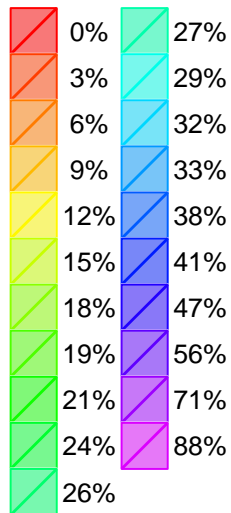

# n-butyl oleate

runday

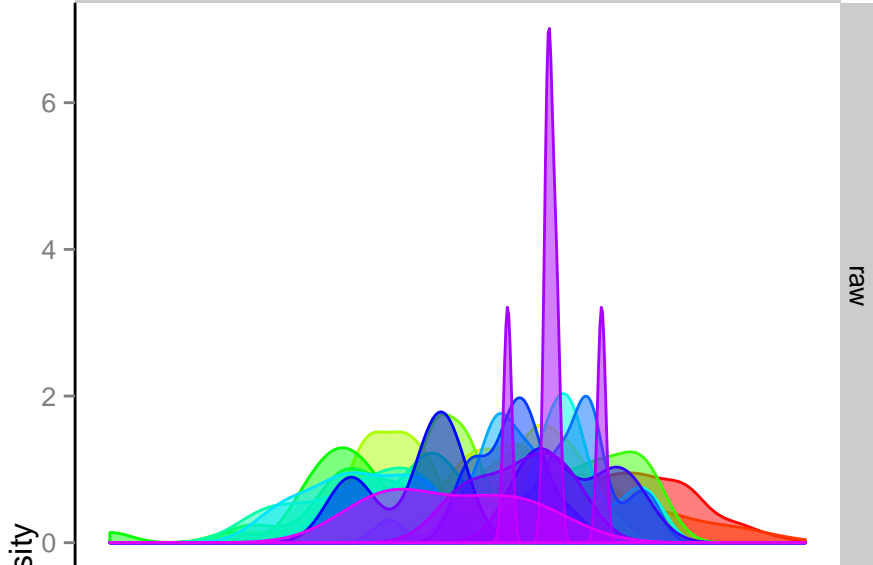

raw

**PLATFORMRUNDAY\_miss**

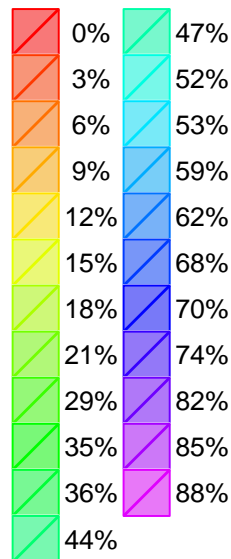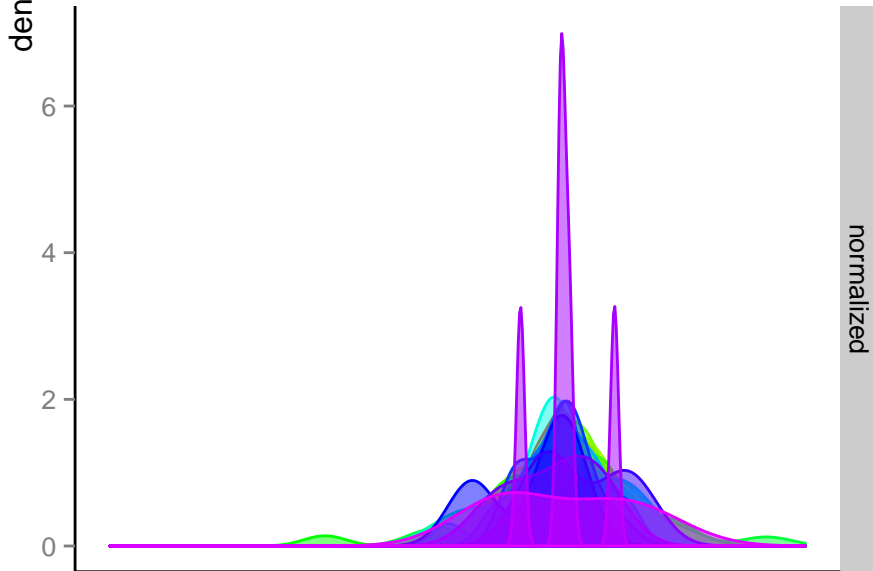

normalized

log(ion counts)

# N1-methyladenosine

runday

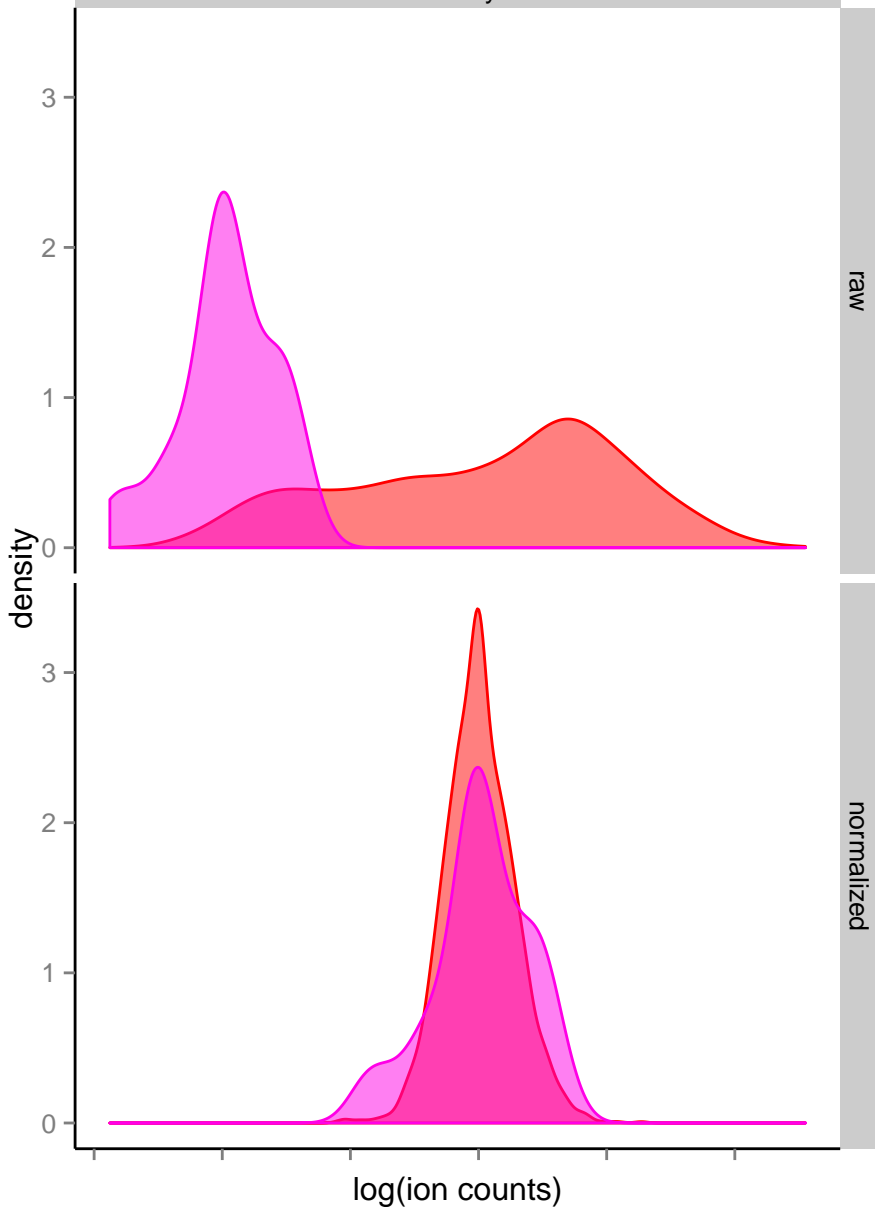

raw

normalized

**PLATFORMRUNDAY\_miss**



0%

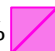

3%

log(ion counts)



# N2;N2-dimethylguanosine

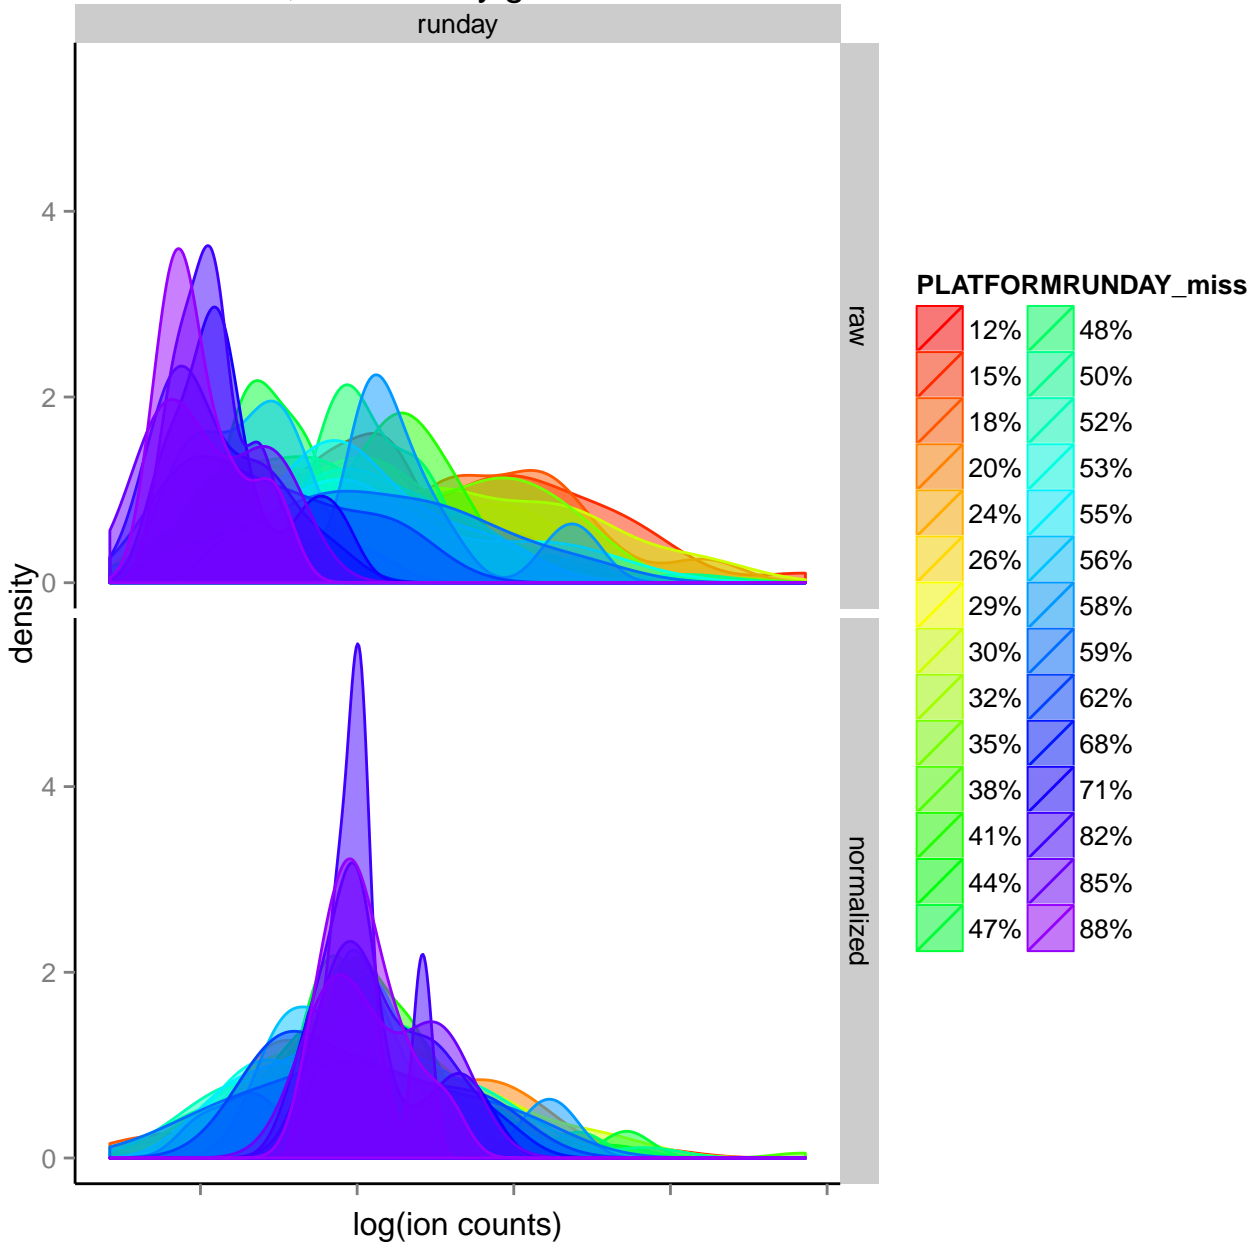

# nonadecanoate (19:0)

runday

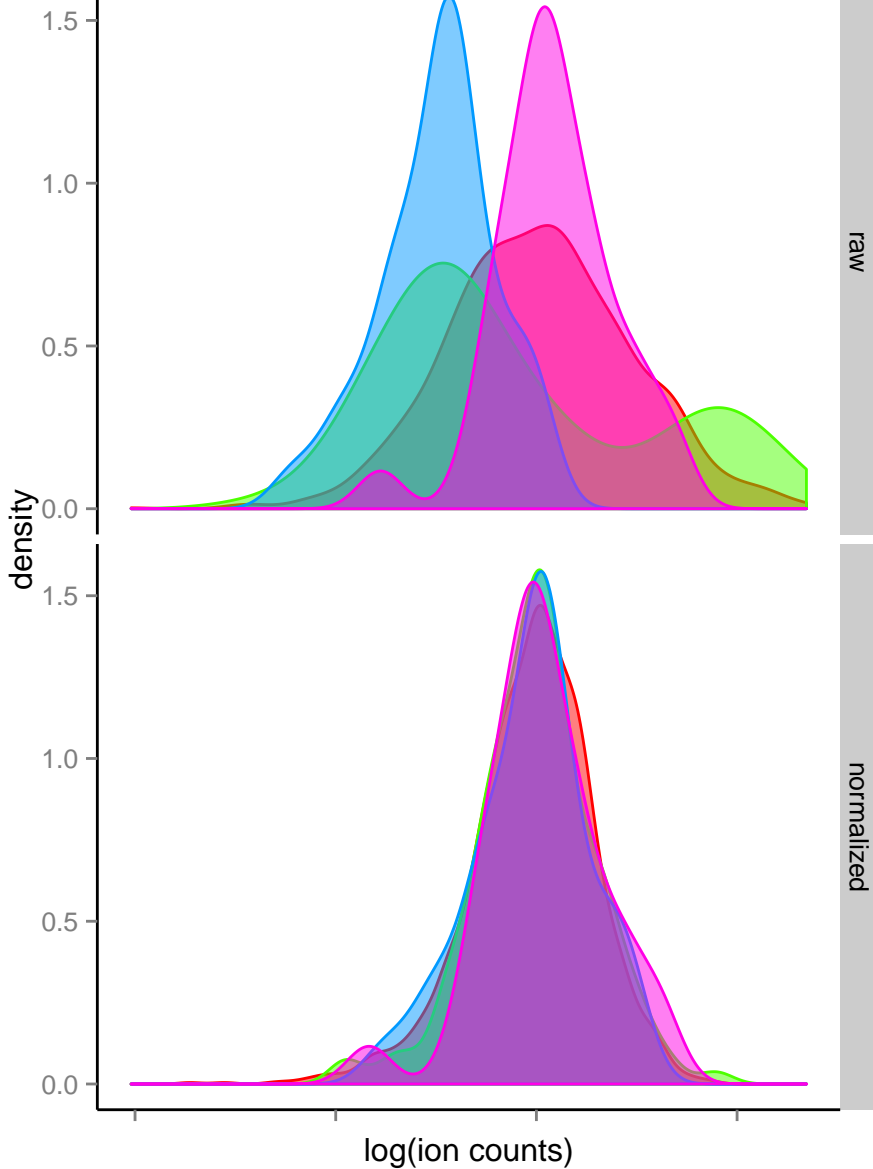

raw

normalized

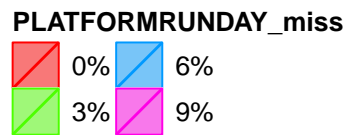

# octadecanedioate

runday

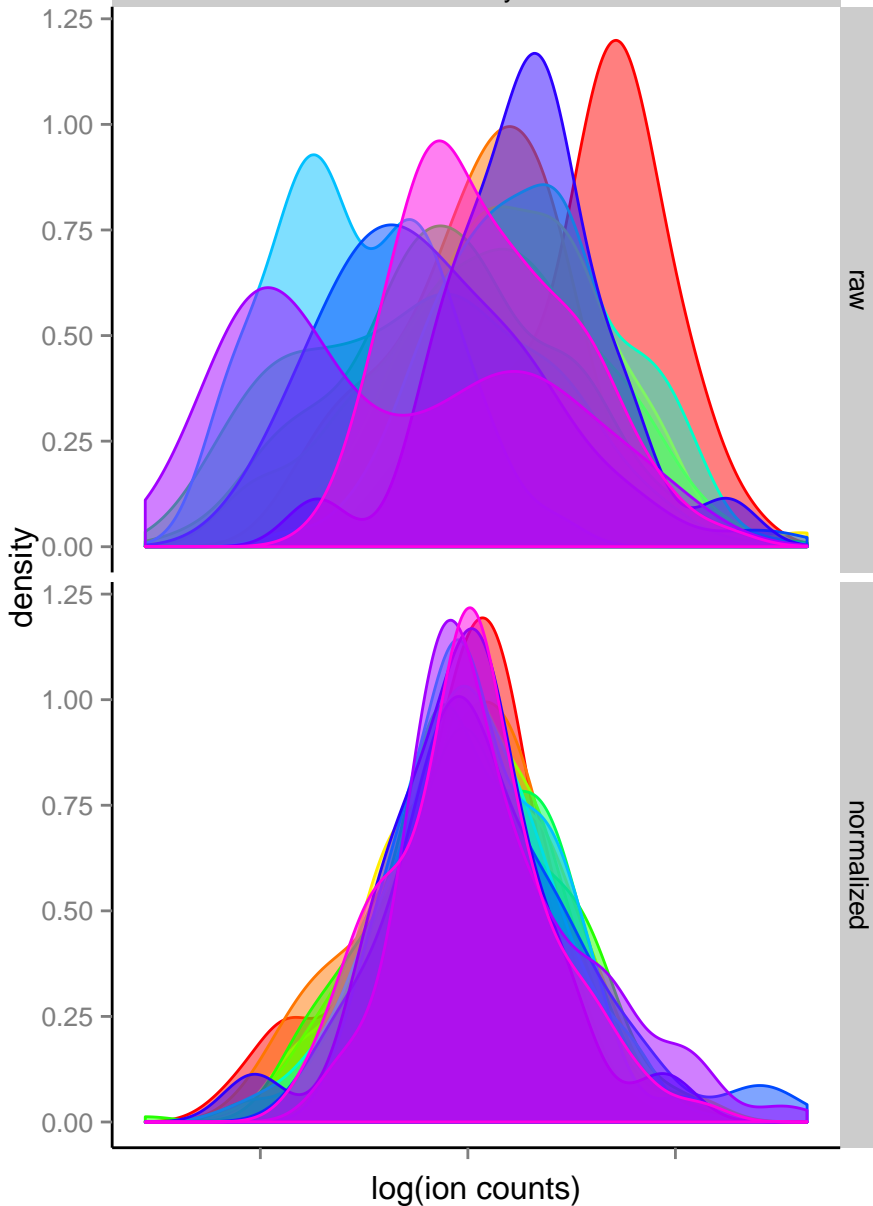

raw

normalized

## PLATFORMRUNDAY\_miss

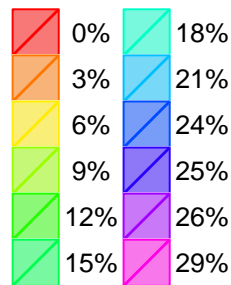

# octanoylcarnitine

runday

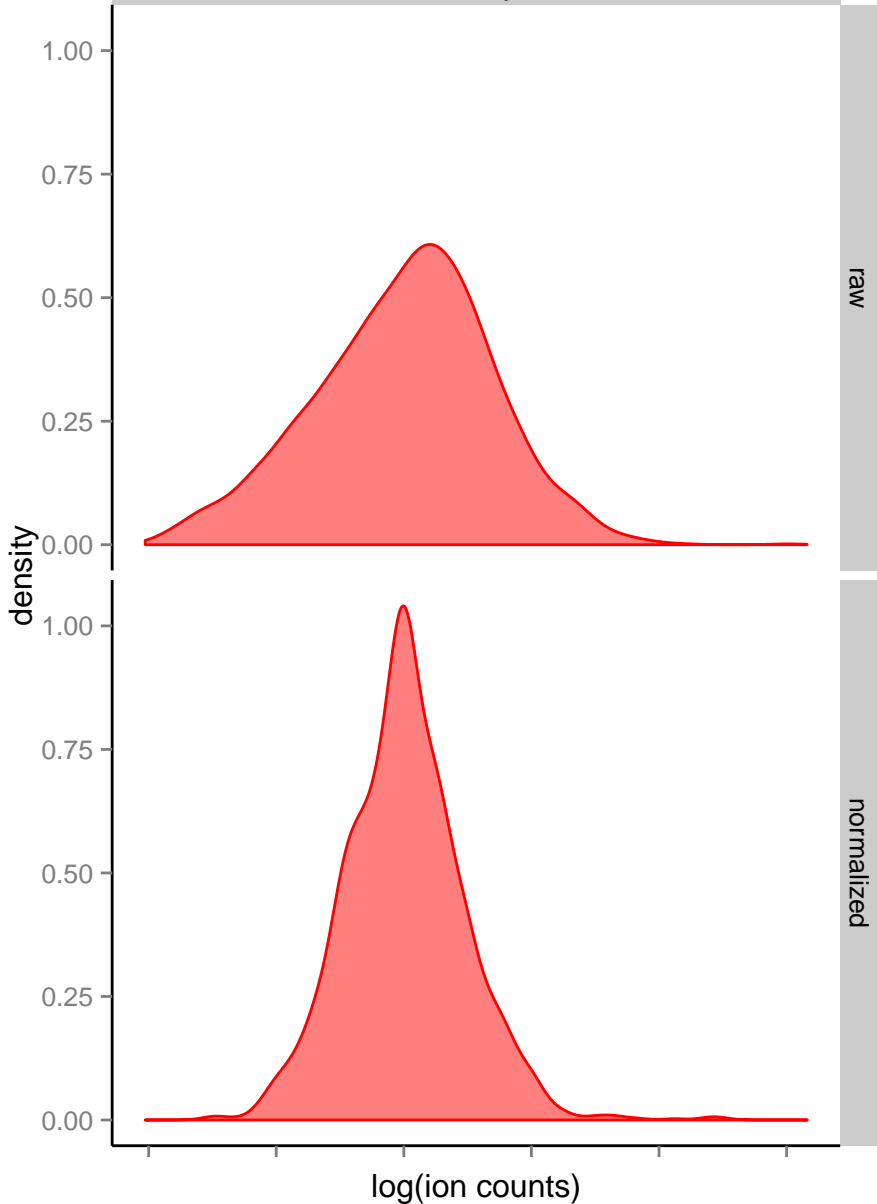

raw

normalized

**PLATFORMRUNDAY\_miss**

0%

# oleamide

runday

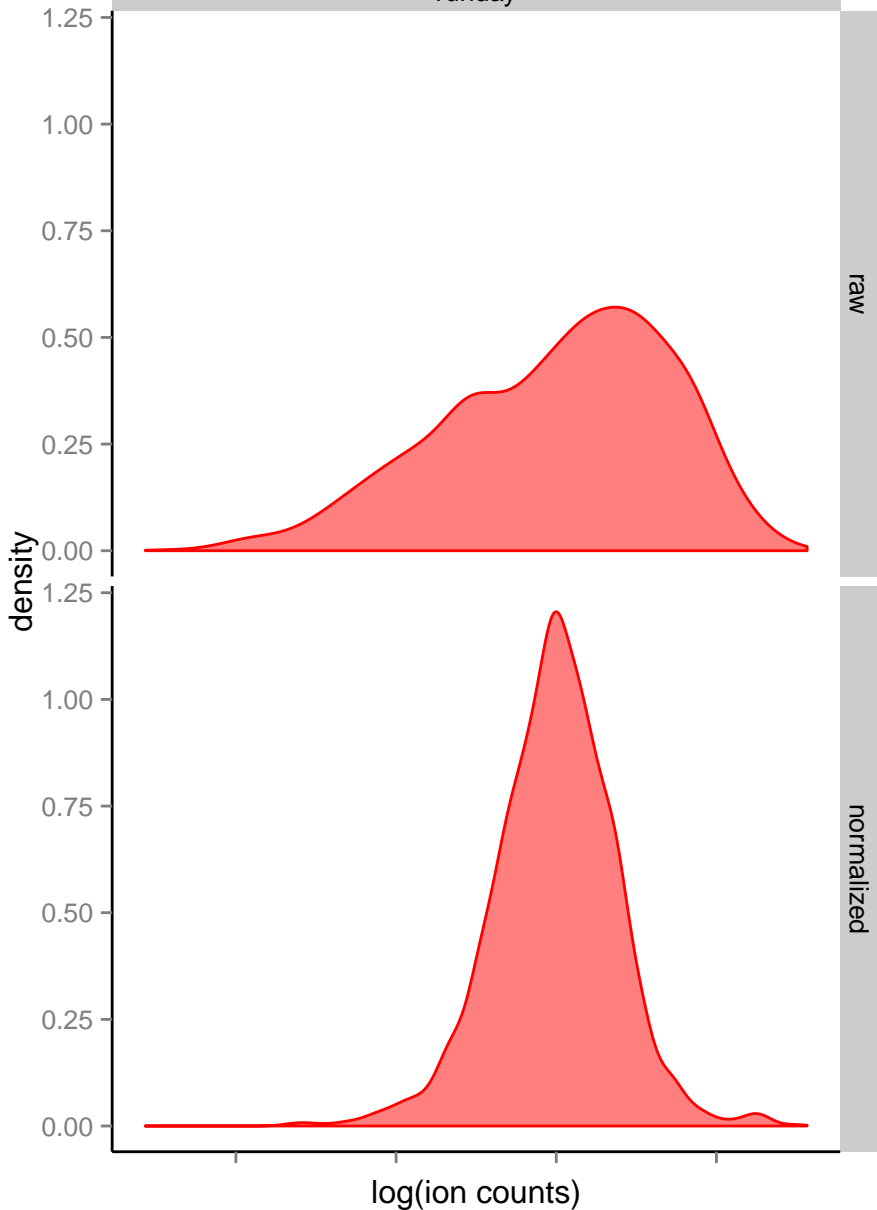

raw

normalized

**PLATFORMRUNDAY\_miss**

0%

# oleate (18:1n9)

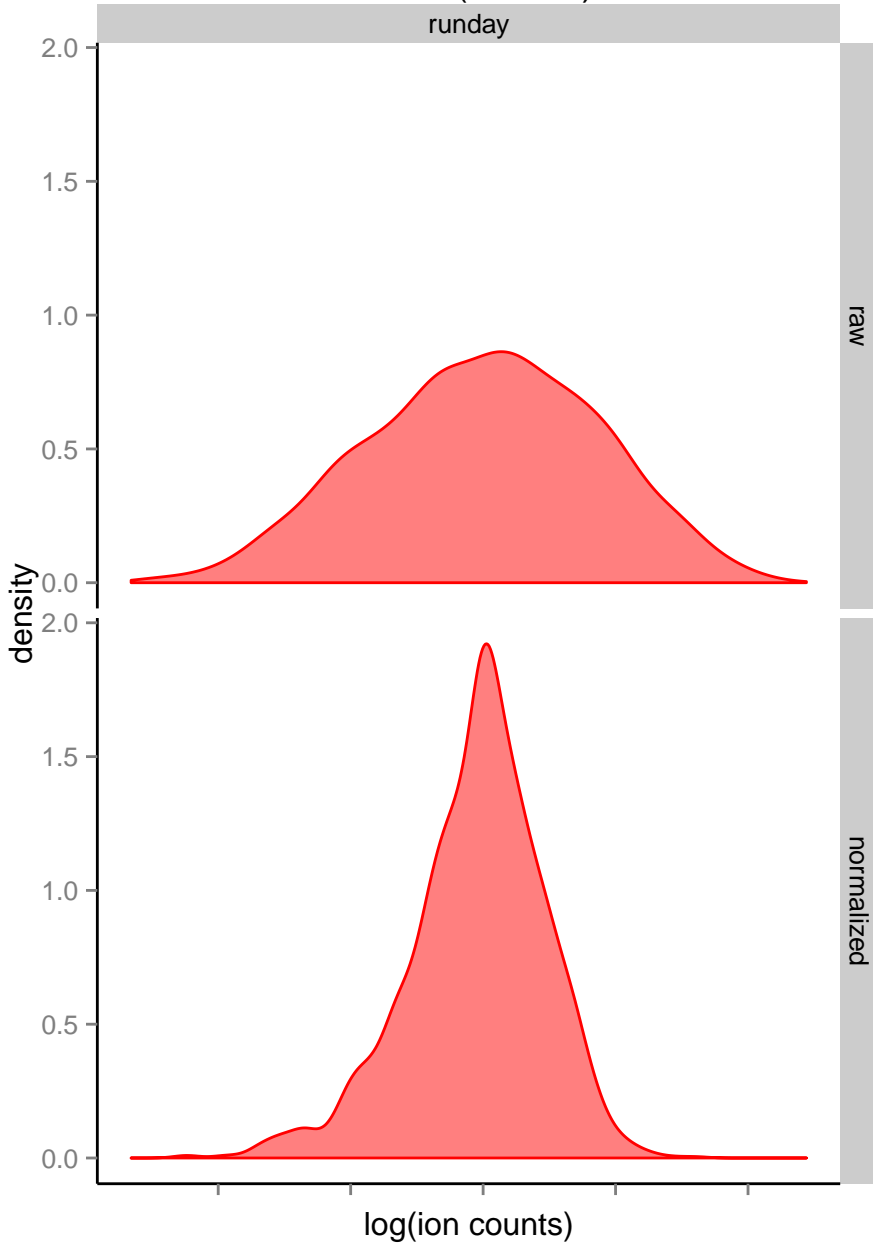

**PLATFORMRUNDAY\_miss**

0%

# oleoylcarnitine

runday

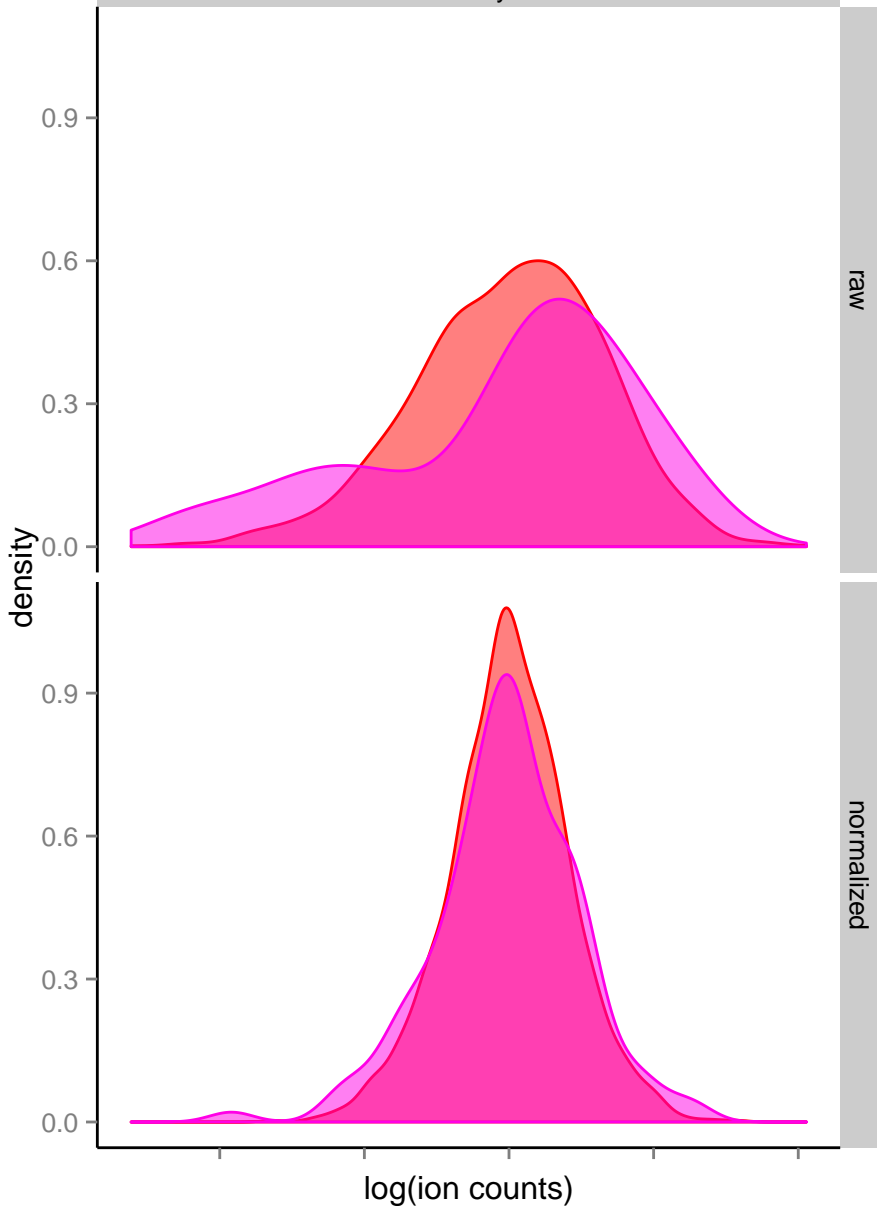

**PLATFORMRUNDAY\_miss**

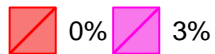

# ornithine

runday

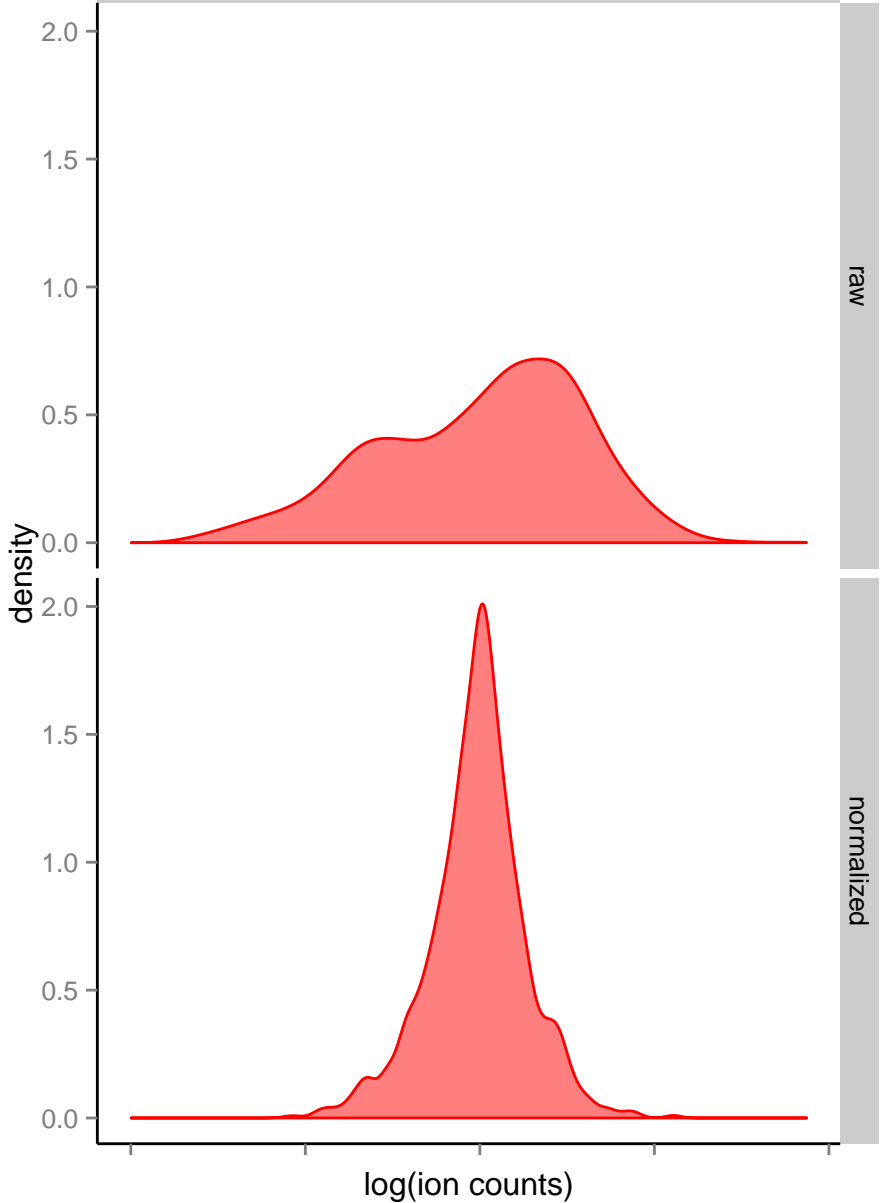

raw

normalized

**PLATFORMRUNDAY\_miss**

0%



# p-acetamidophenylglucuronide

runday

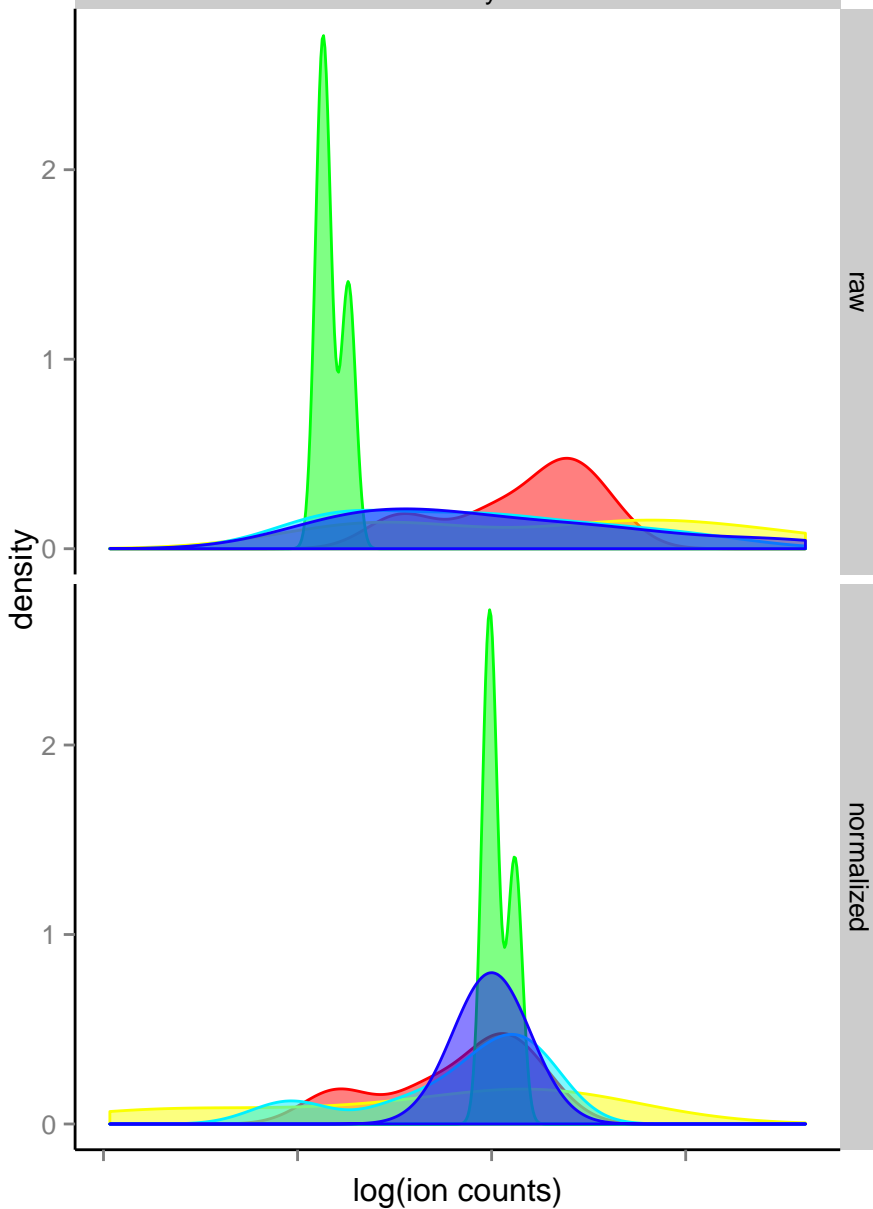

**PLATFORMRUNDAY\_miss**

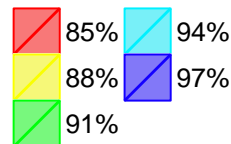

# p-cresol sulfate

runday

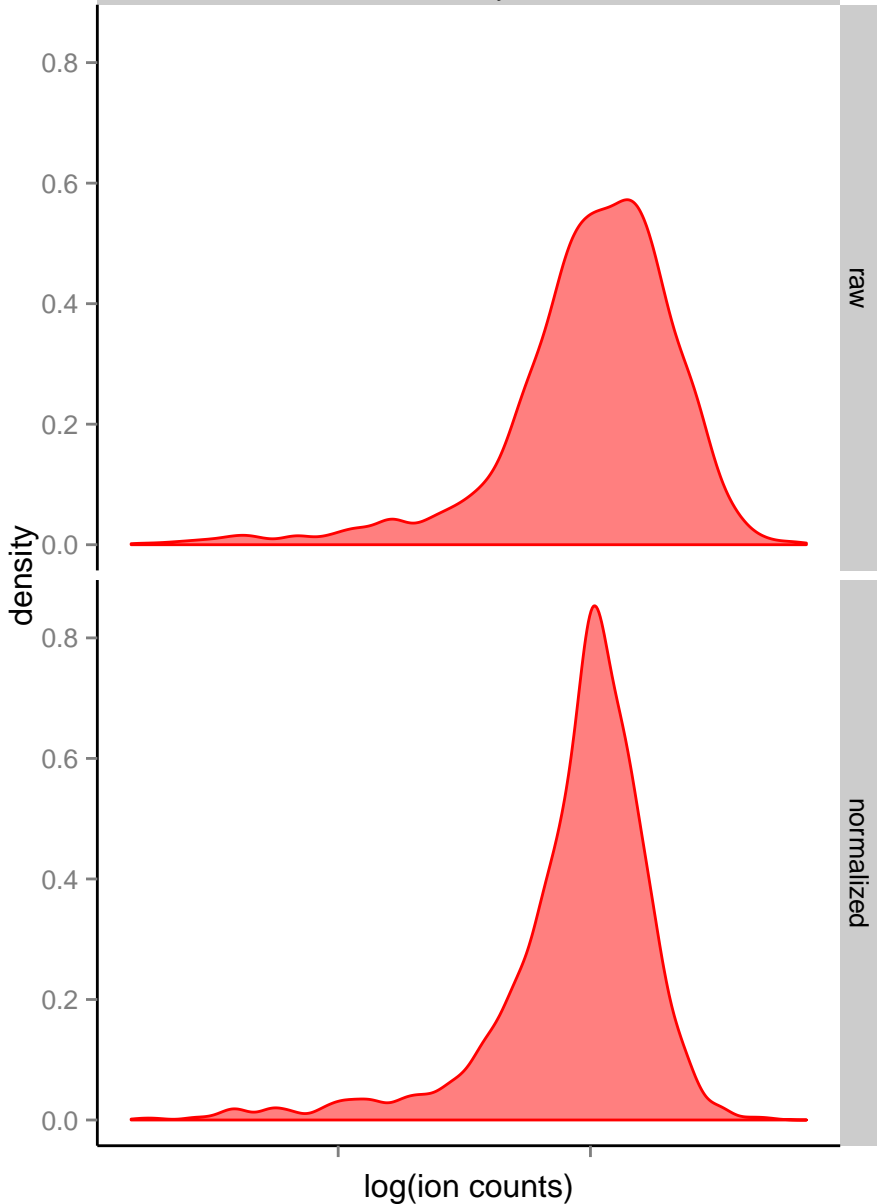

raw

normalized

**PLATFORMRUNDAY\_miss**

0%

# palmitate (16:0)

runday

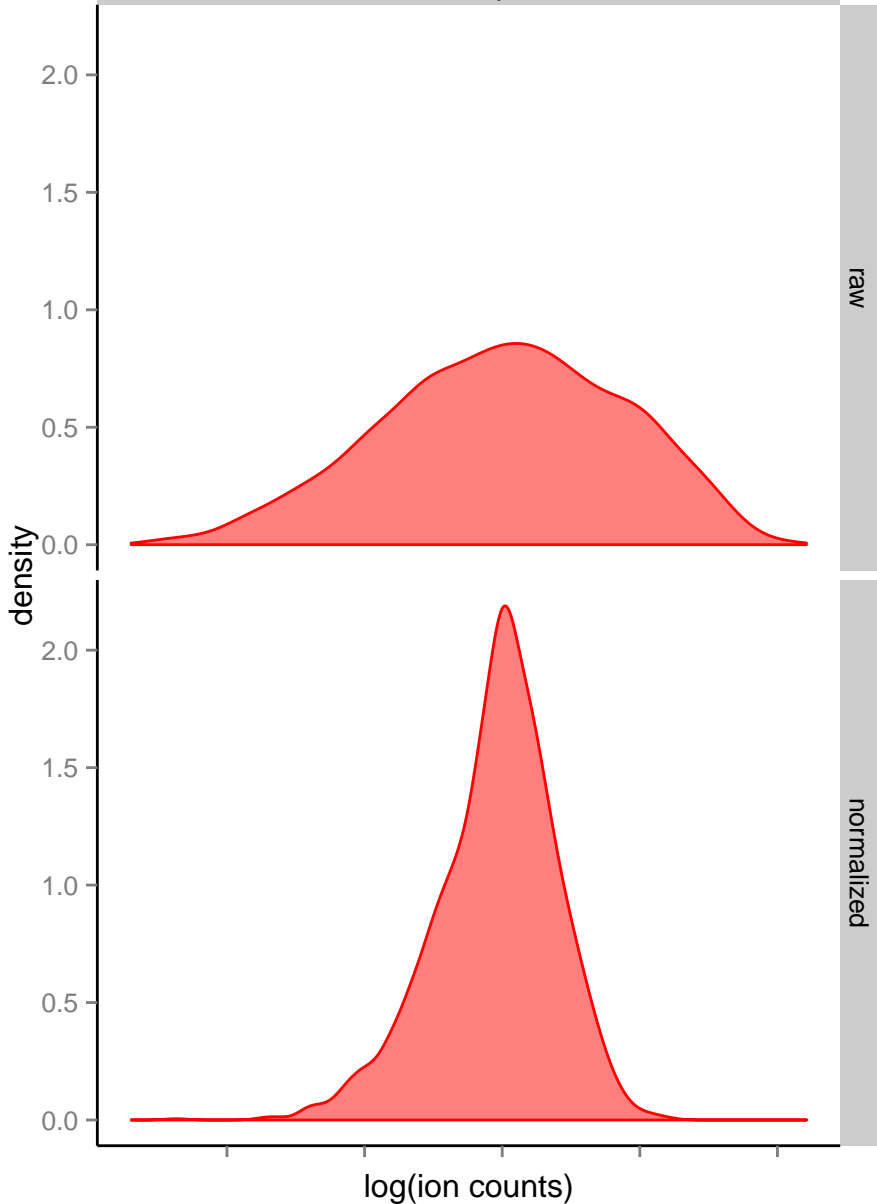

**PLATFORMRUNDAY\_miss**

0%

# palmitoleate (16:1n7)

runday

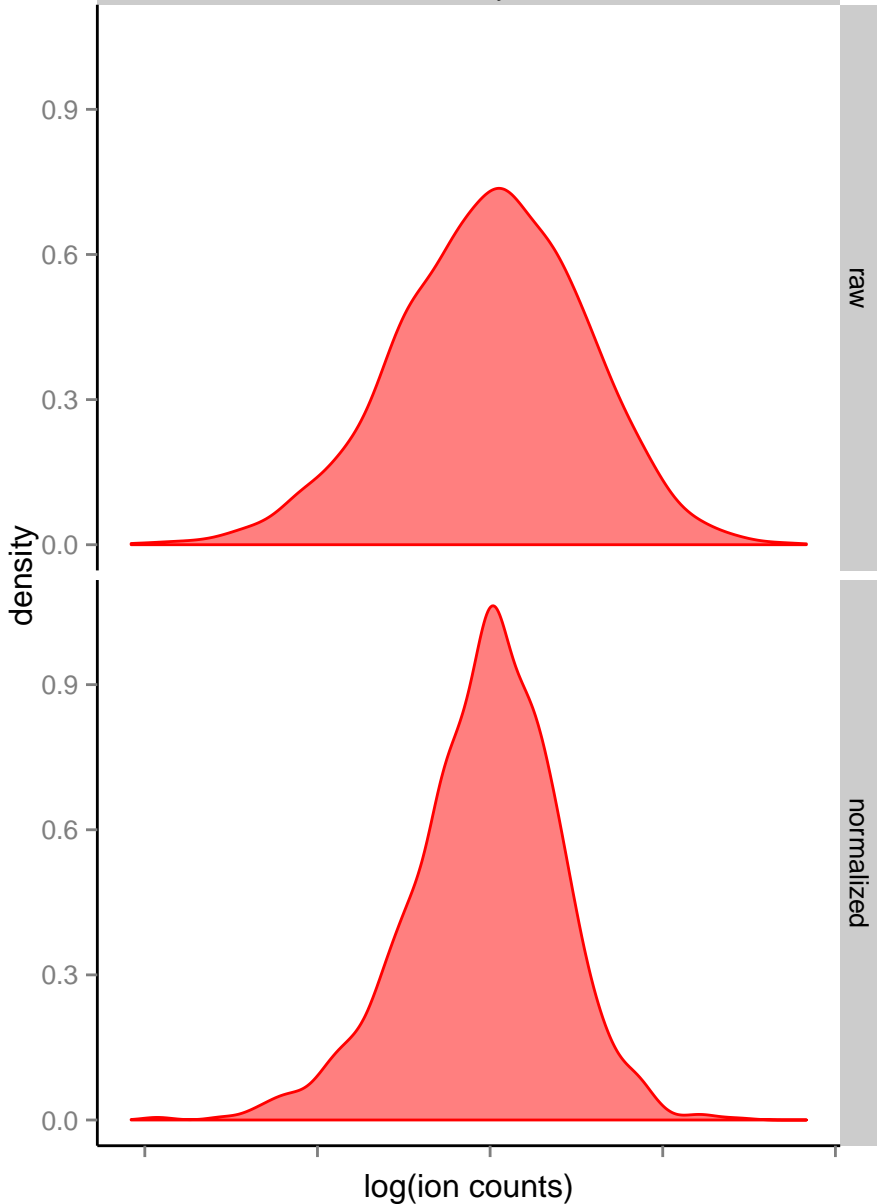

raw

normalized

**PLATFORMRUNDAY\_miss**

0%

# palmitoylcarnitine

runday

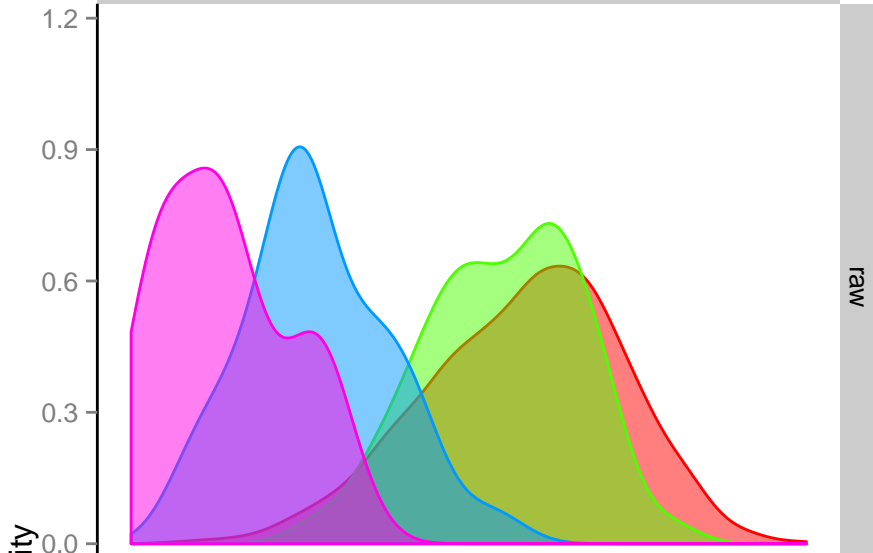

raw

**PLATFORMRUNDAY\_miss**

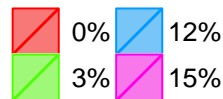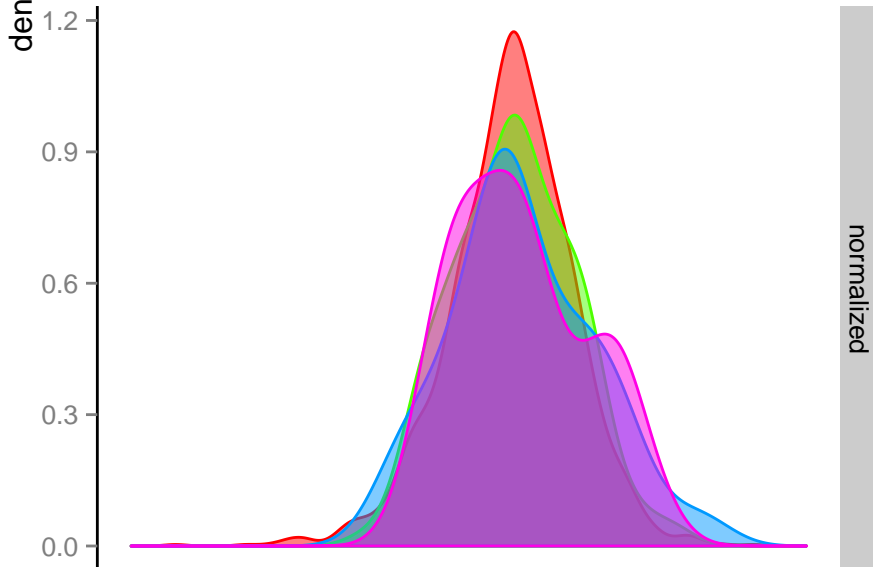

normalized

log(ion counts)

# pantothenate

runday

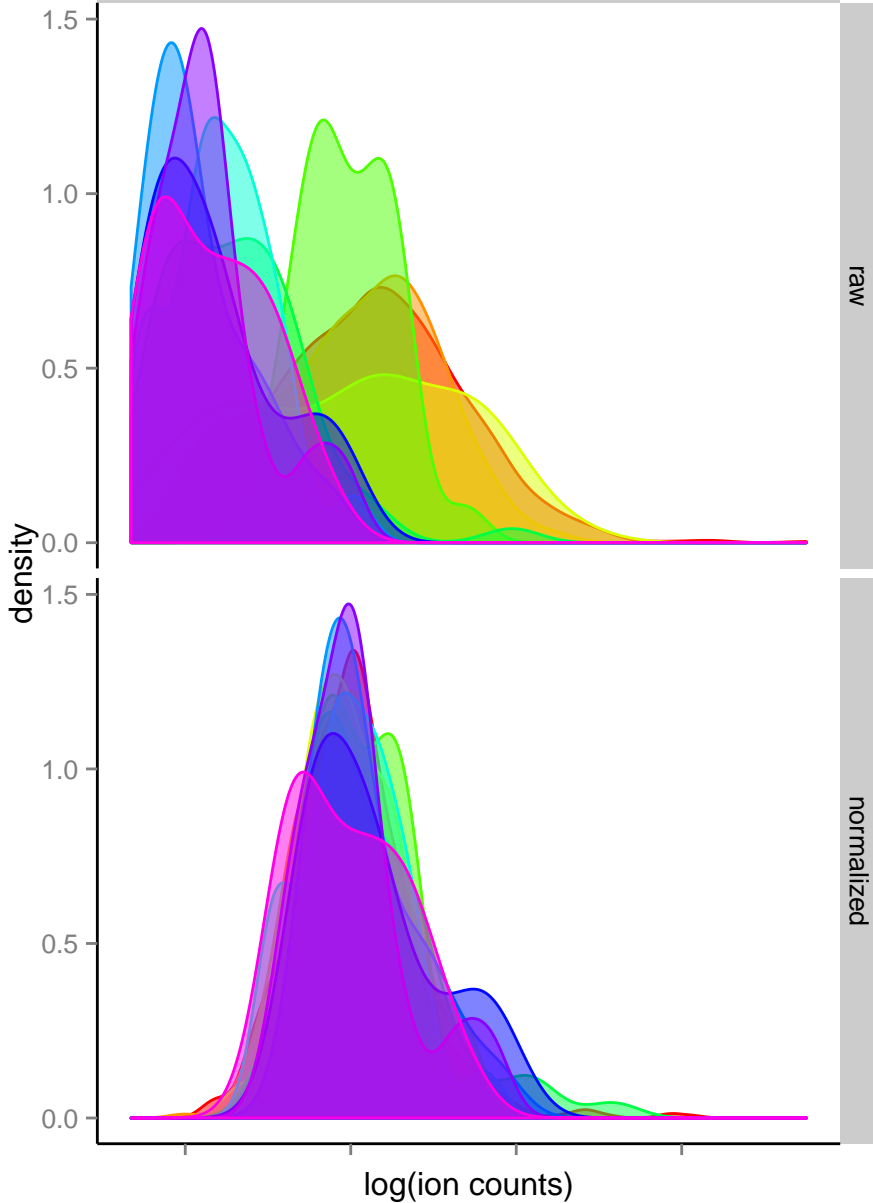

**PLATFORMRUNDAY\_miss**

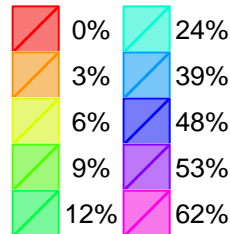

# paraxanthine

runday

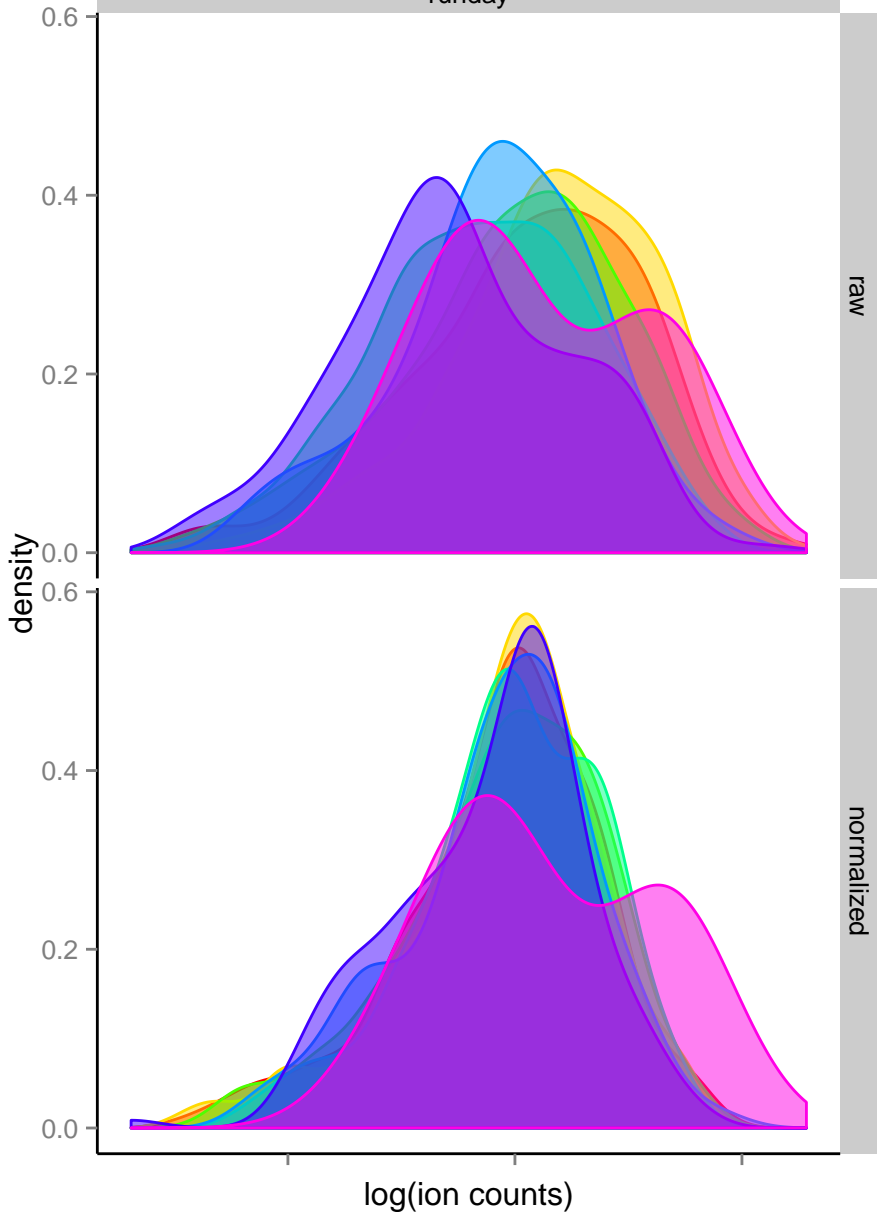

## PLATFORMRUNDAY\_miss

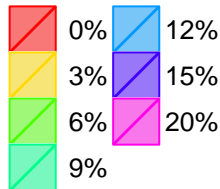

# pelargonate (9:0)

runday

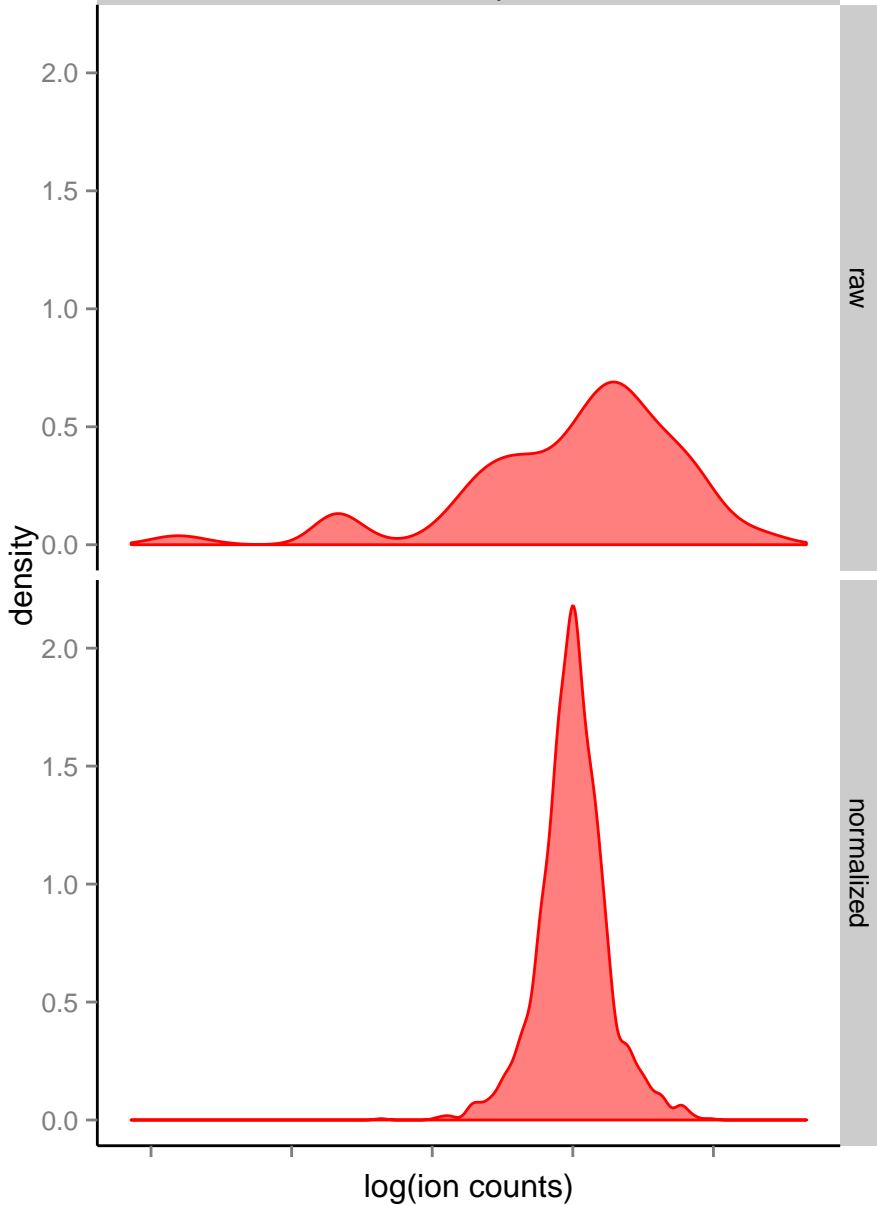

**PLATFORMRUNDAY\_miss**

0%



# pentadecanoate (15:0)

runday

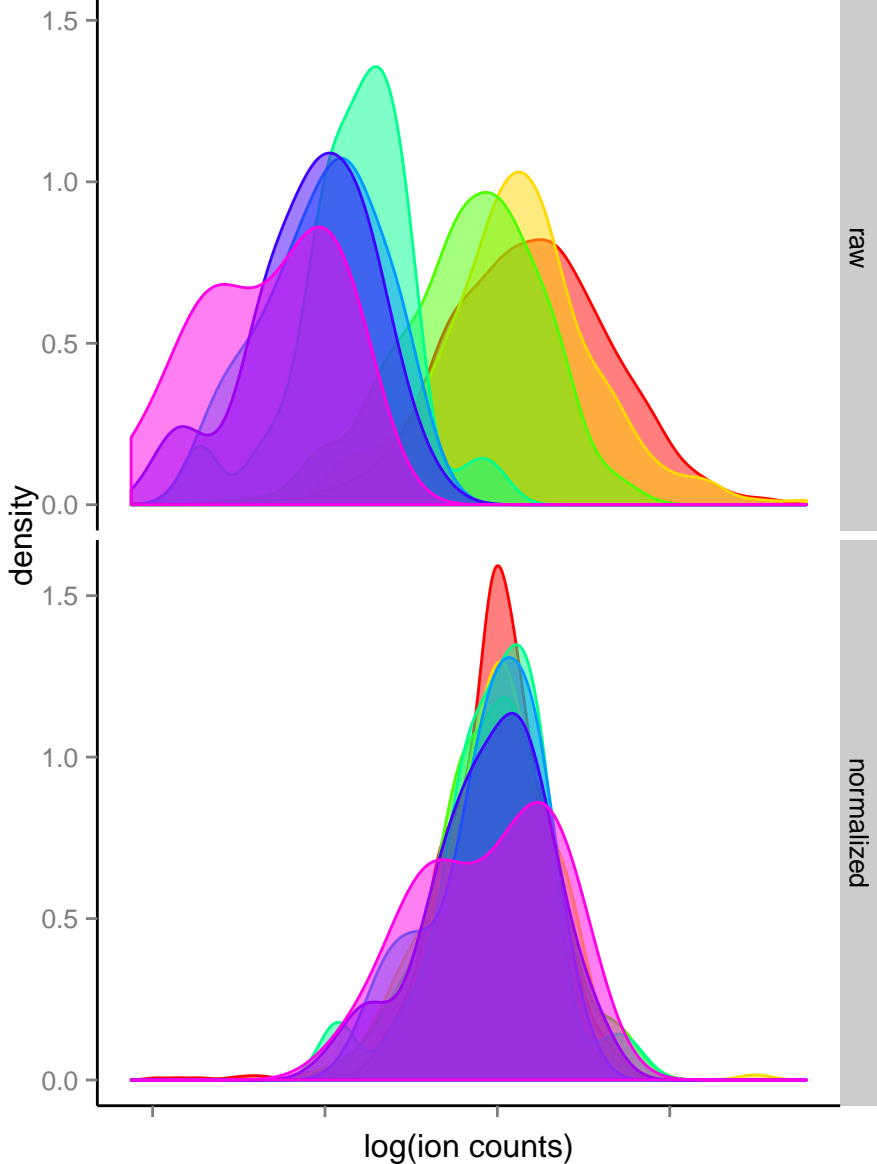

raw

normalized

## PLATFORMRUNDAY\_miss

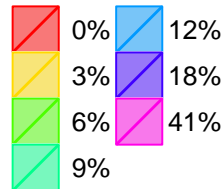

# phenol sulfate

runday

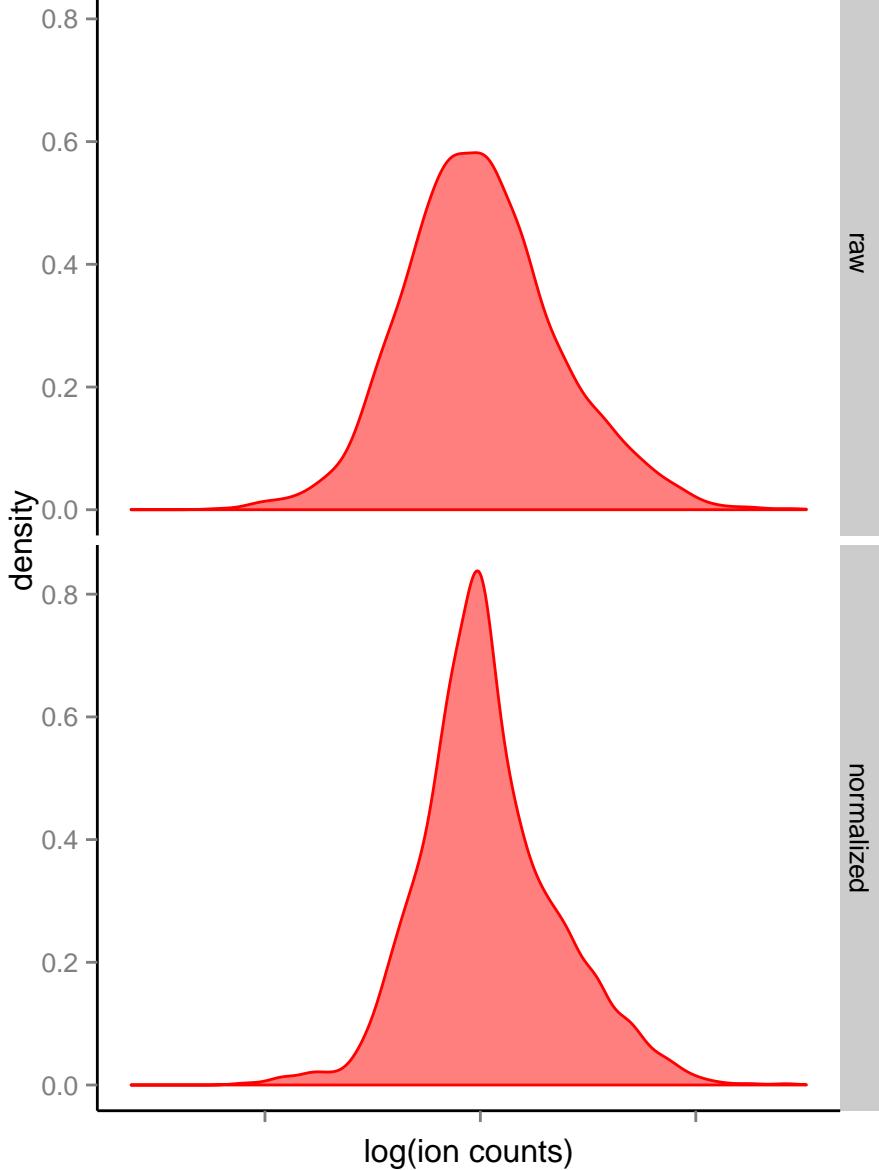

**PLATFORMRUNDAY\_miss**

0%

# phenylacetate

runday

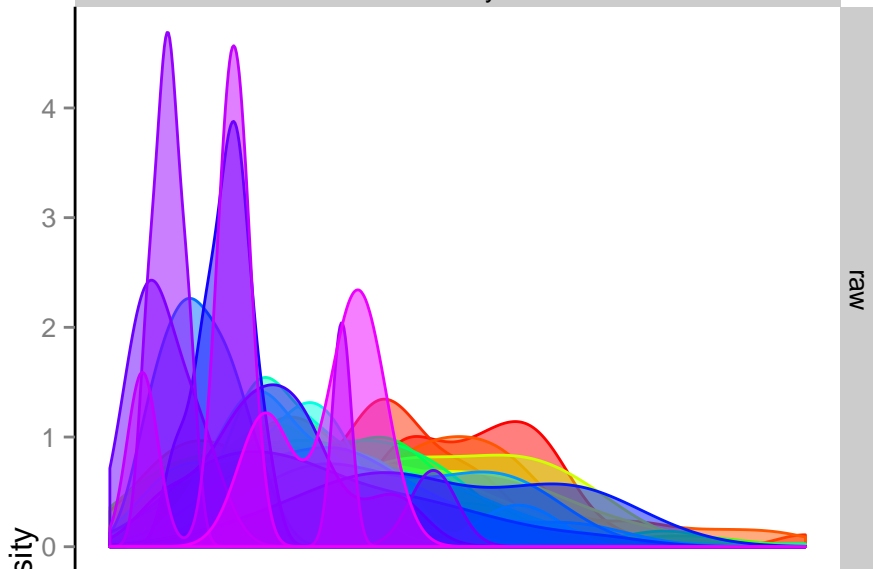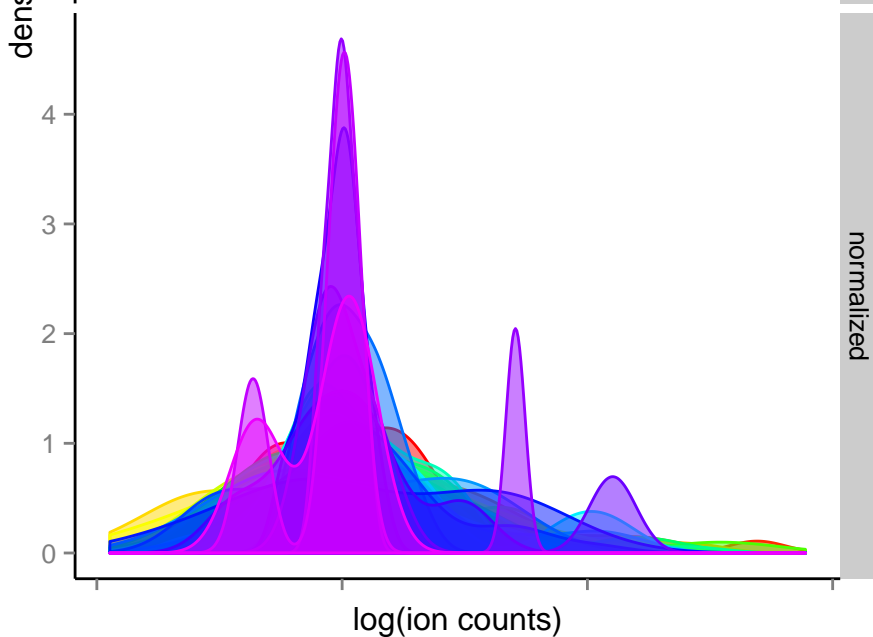

## PLATFORMRUNDAY\_miss

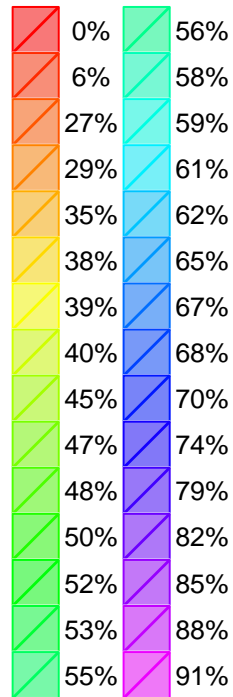

# phenylacetylglutamine

runday

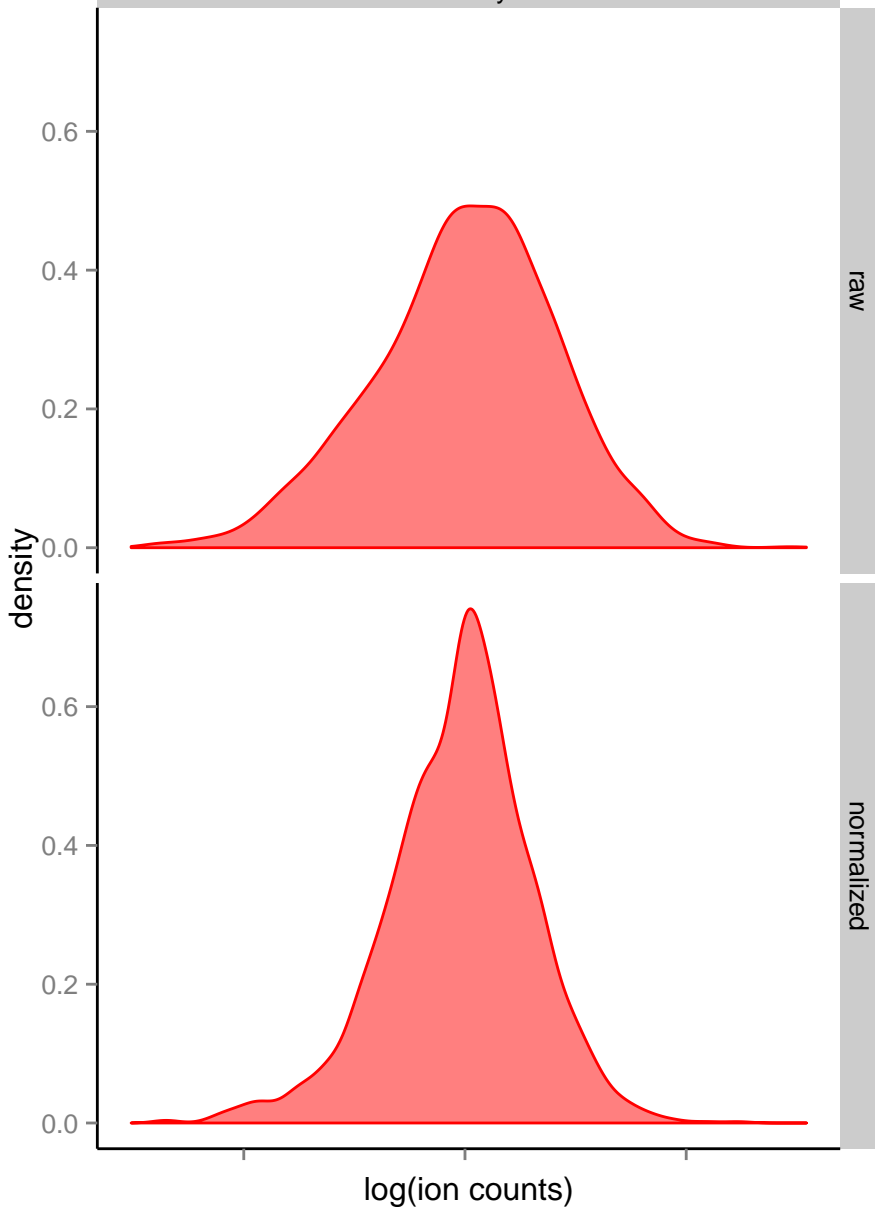

raw

normalized

**PLATFORMRUNDAY\_miss**

0%

# phenylalanine

runday

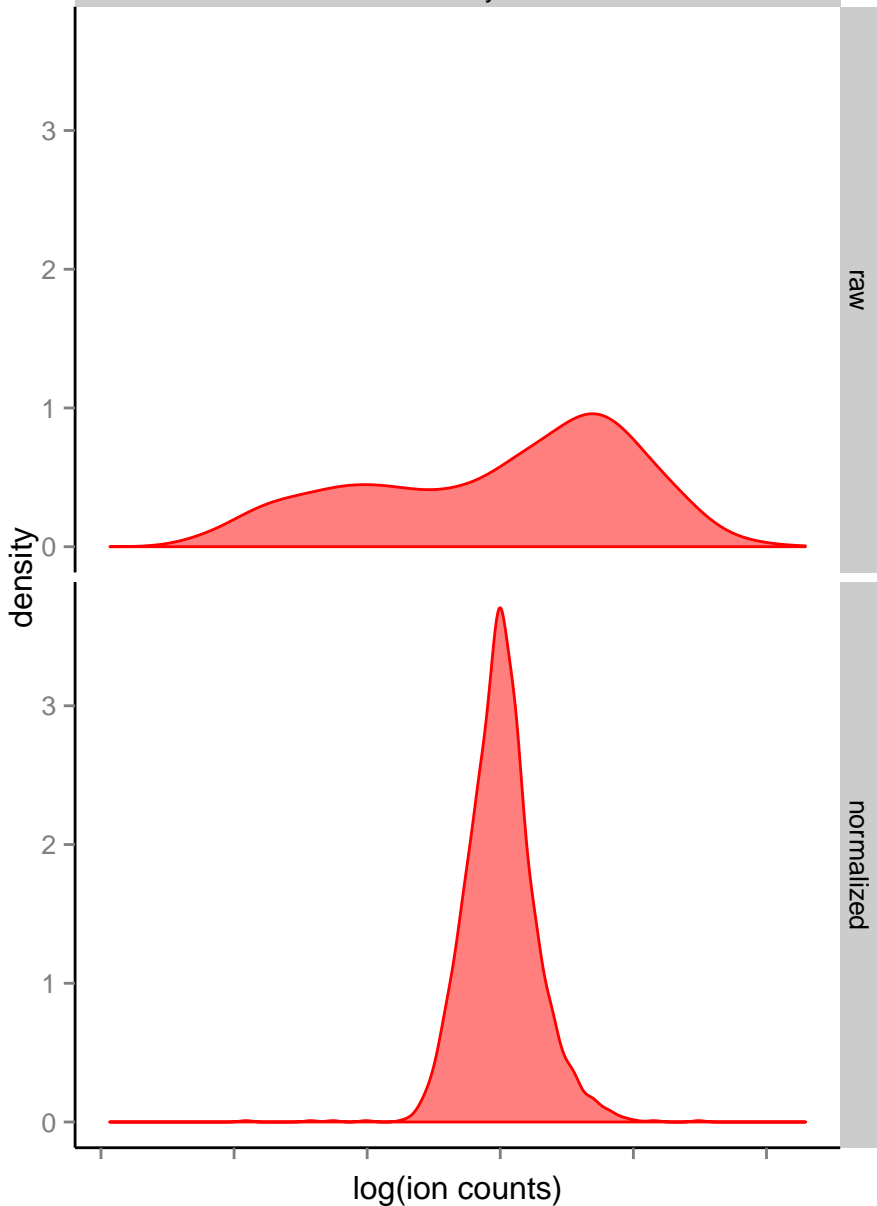

PLATFORMRUNDAY\_miss

0%

# phenyllactate (PLA)

runday

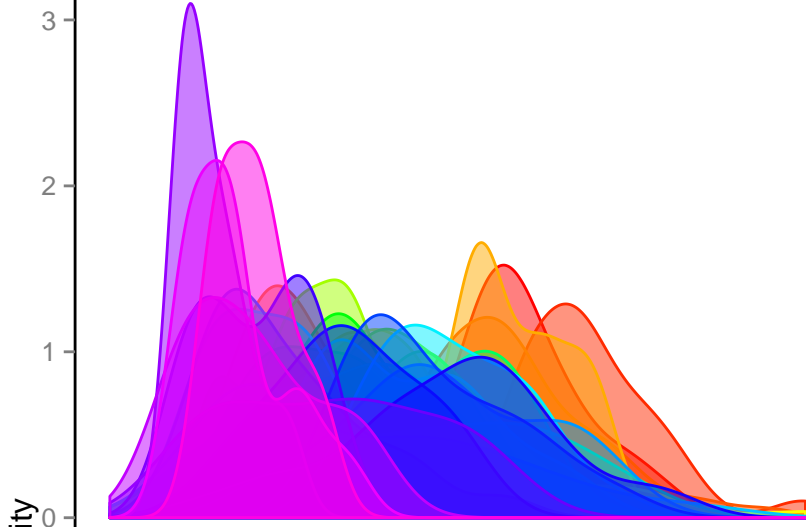

raw

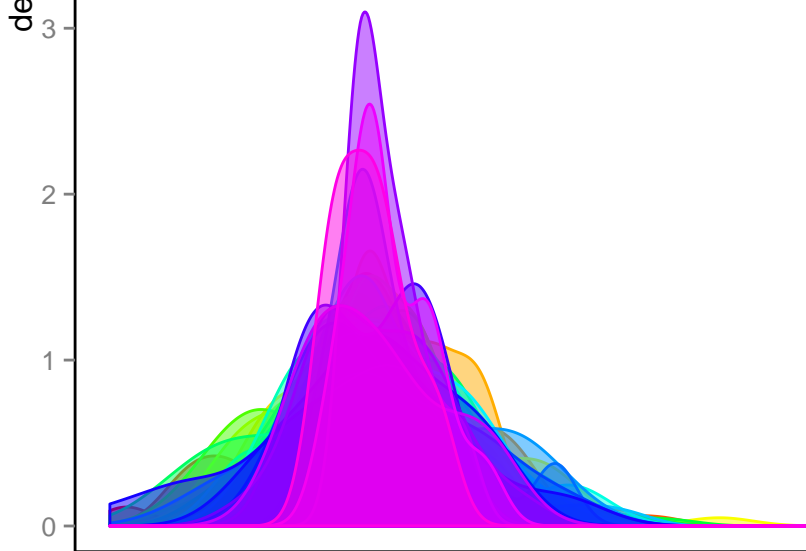

normalized

log(ion counts)

## PLATFORMRUNDAY\_miss

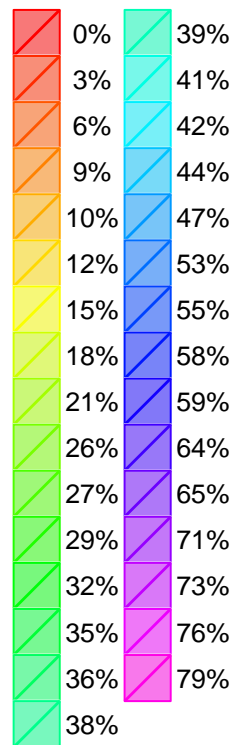

# phosphate

runday

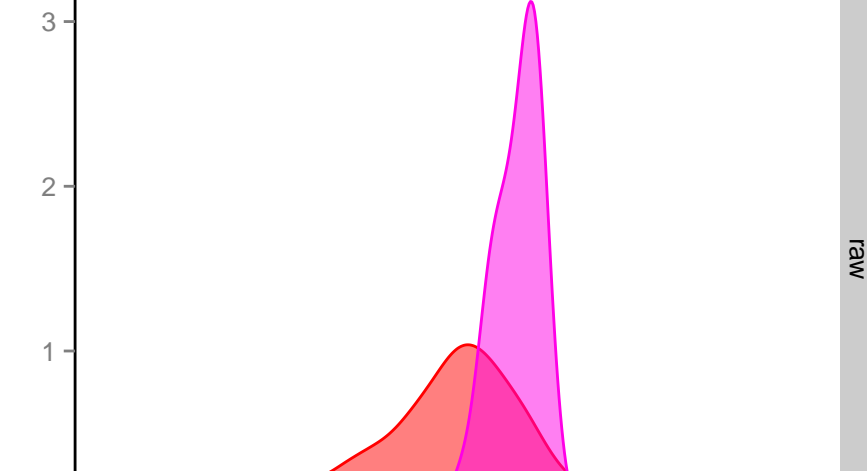

raw

**PLATFORMRUNDAY\_miss**



0%



3%

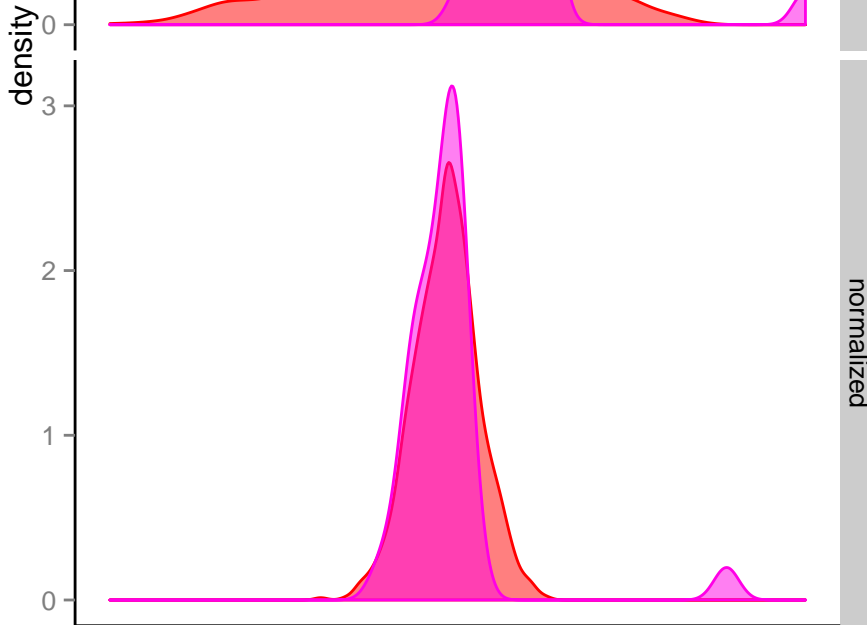

normalized

log(ion counts)

pioglitazone\*

runday

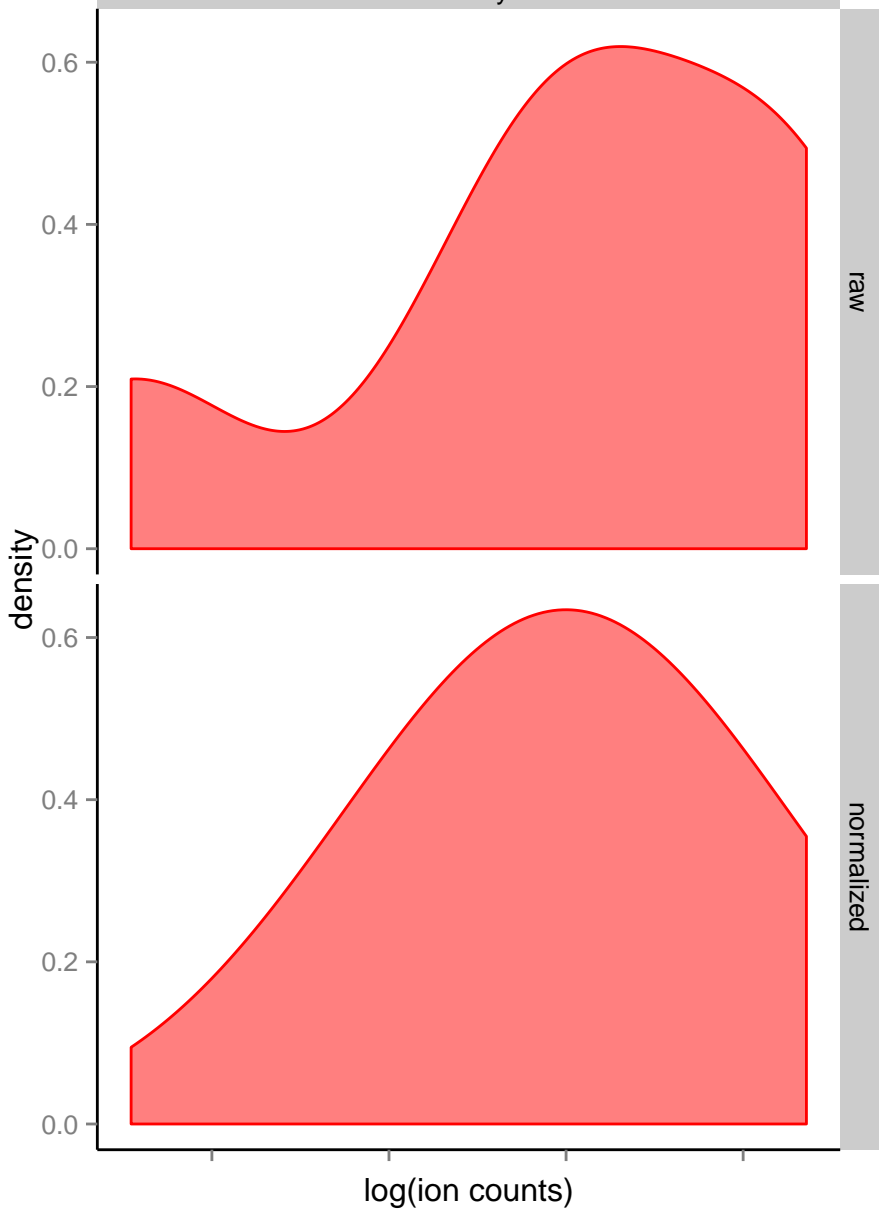

raw

normalized

**PLATFORMRUNDAY\_miss**



97%

log(ion counts)



# pipecolate

runday

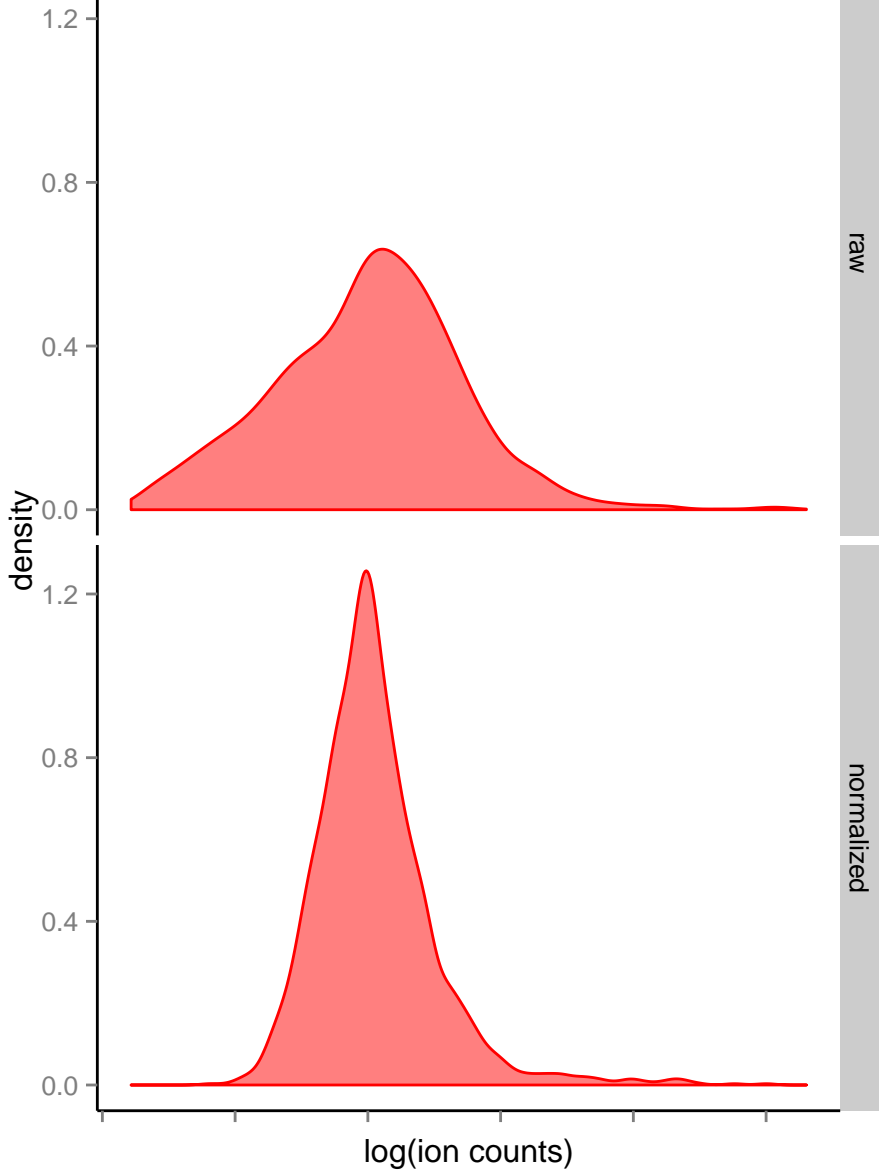

**PLATFORMRUNDAY\_miss**

0%

# pipepine

runday

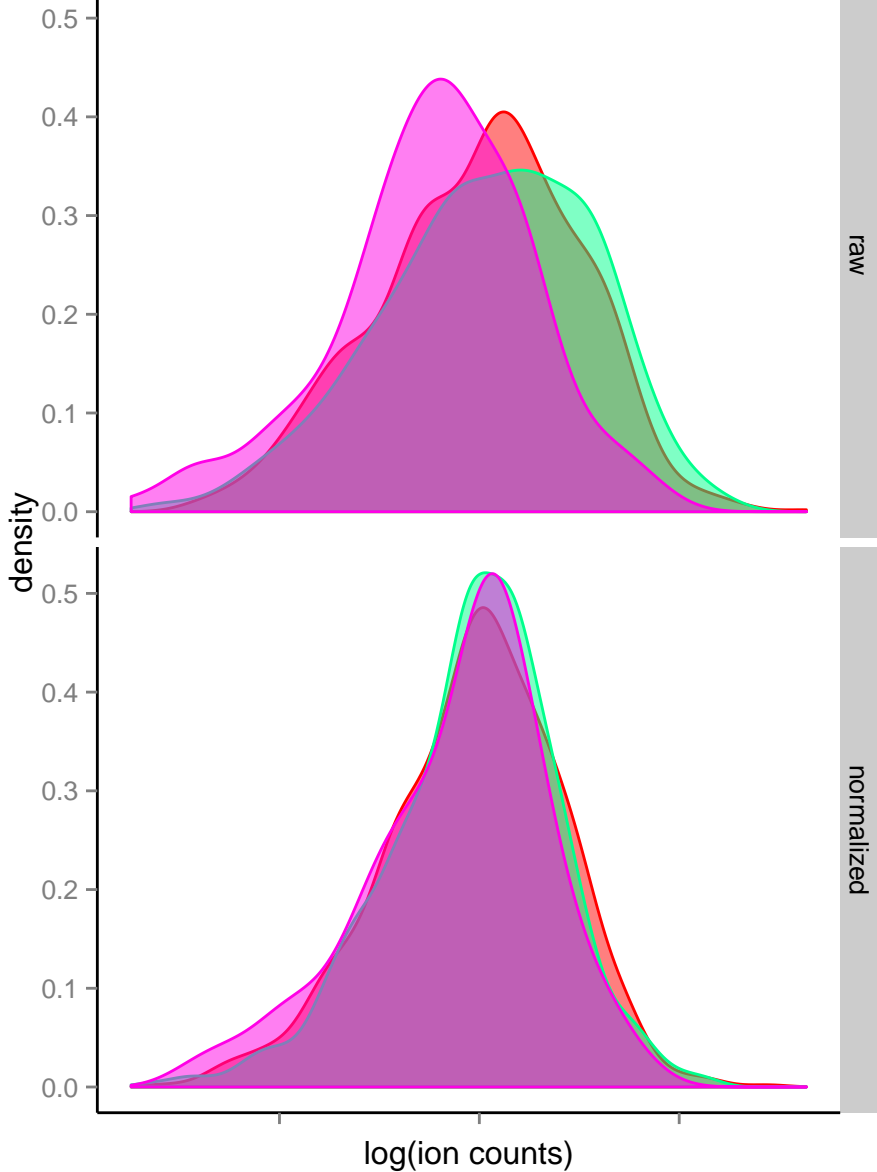

**PLATFORMRUNDAY\_miss**

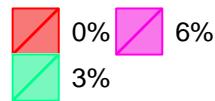

# pro-hydroxy-pro

runday

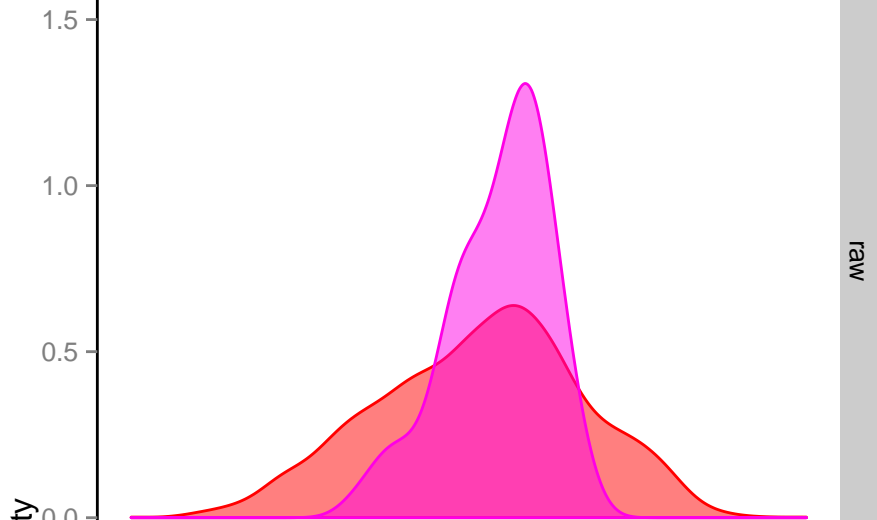

raw

**PLATFORMRUNDAY\_miss**



0%

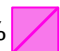

3%

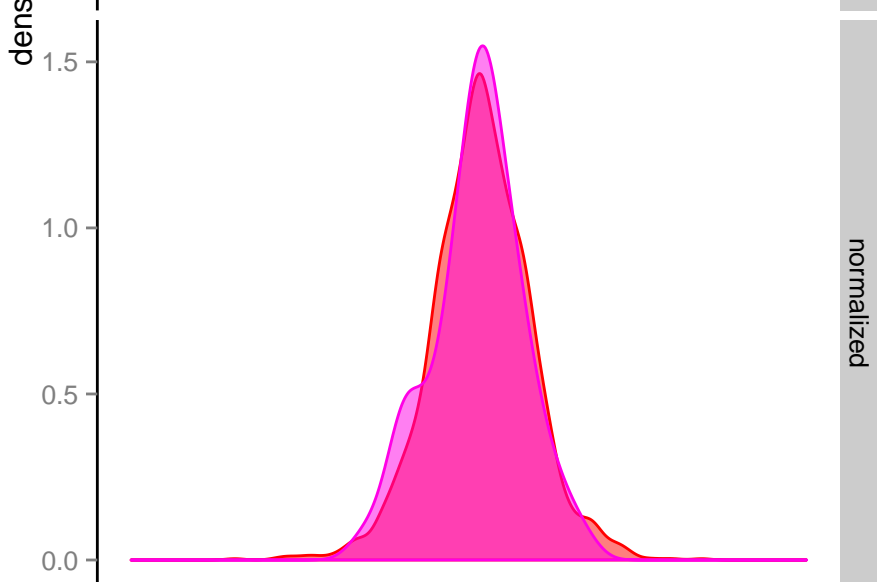

normalized

log(ion counts)

proline

runday

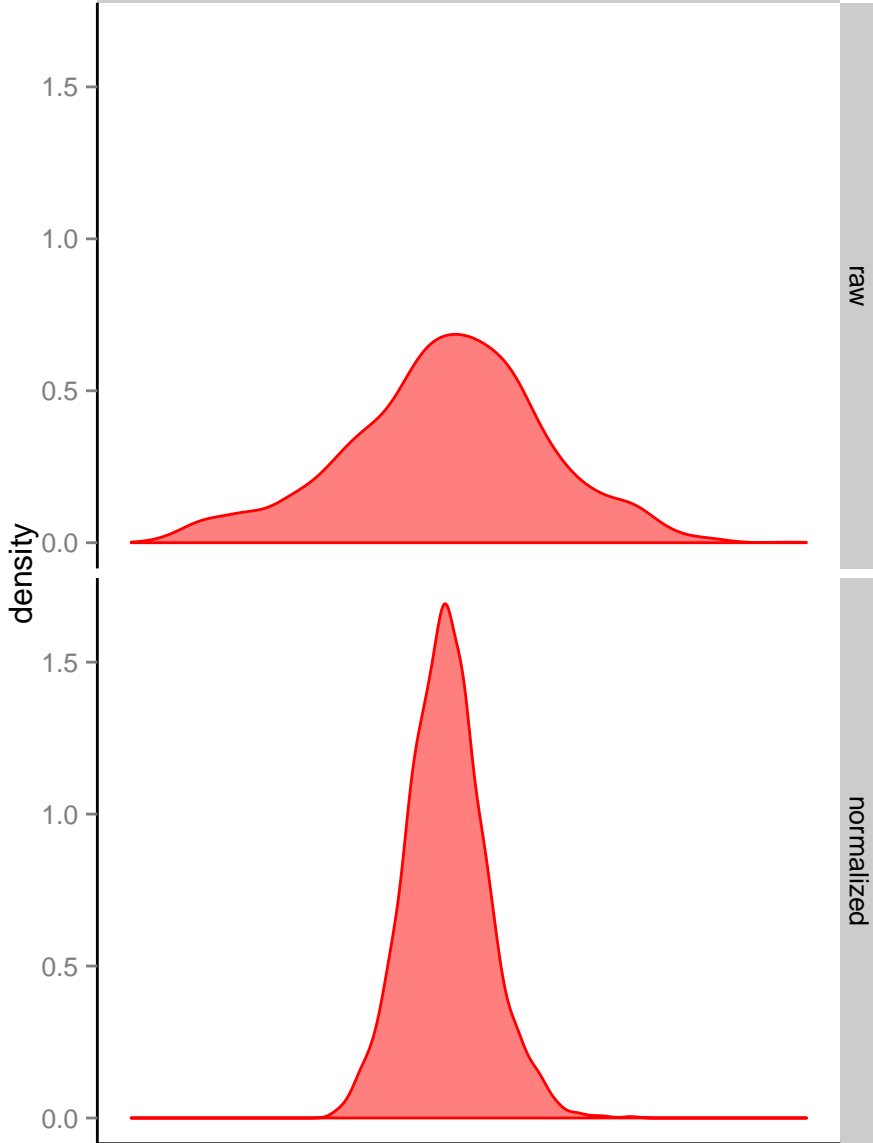

raw

normalized

**PLATFORMRUNDAY\_miss**

0%

# propionylcarnitine

runday

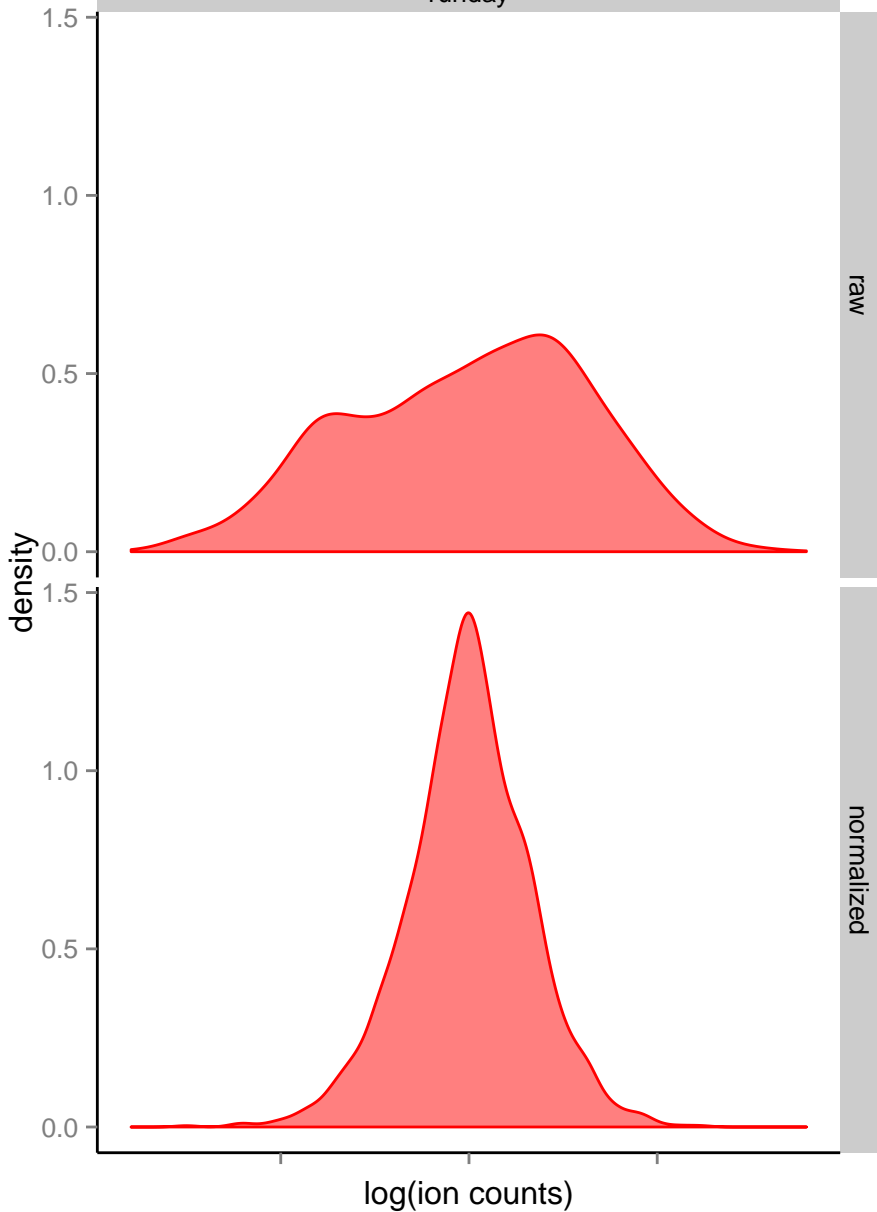

**PLATFORMRUNDAY\_miss**

0%

# pseudouridine

runday

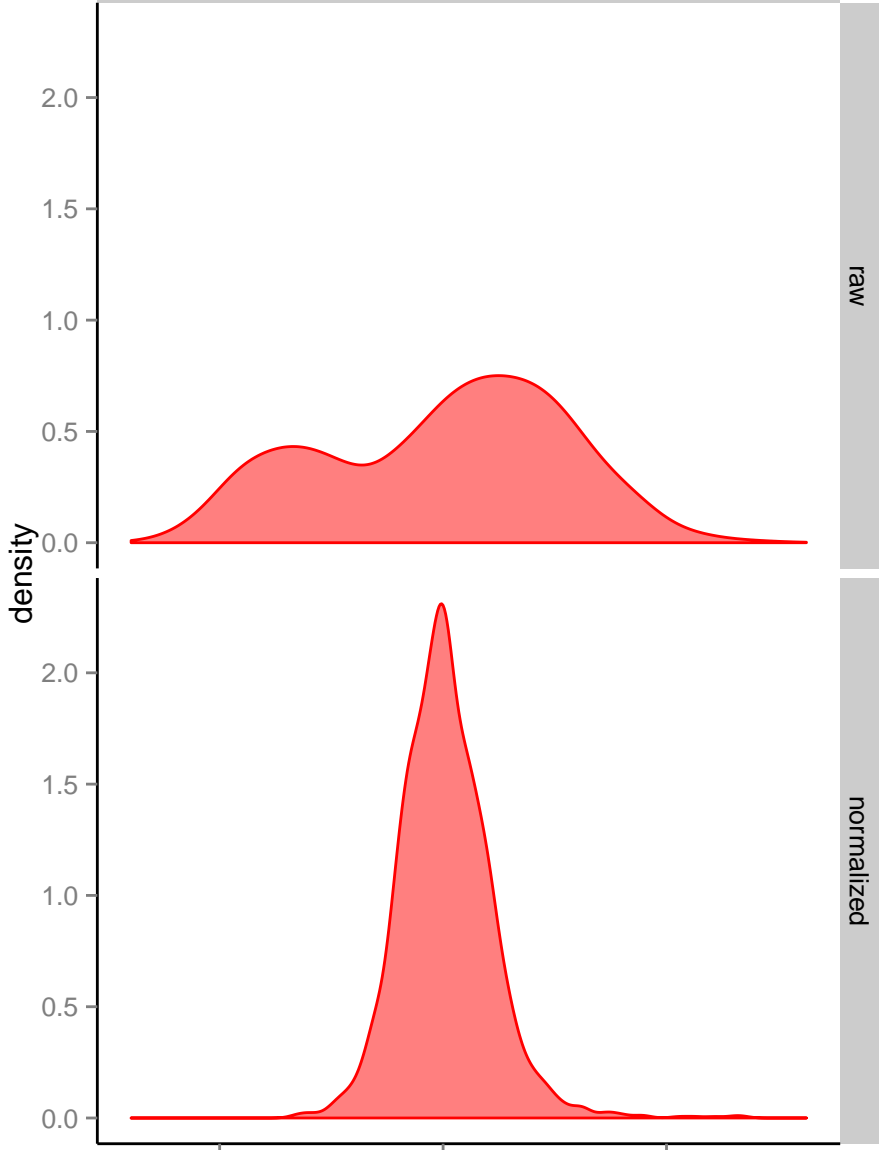

raw

normalized

**PLATFORMRUNDAY\_miss**



0%

log(ion counts)

# pyridoxate

runday

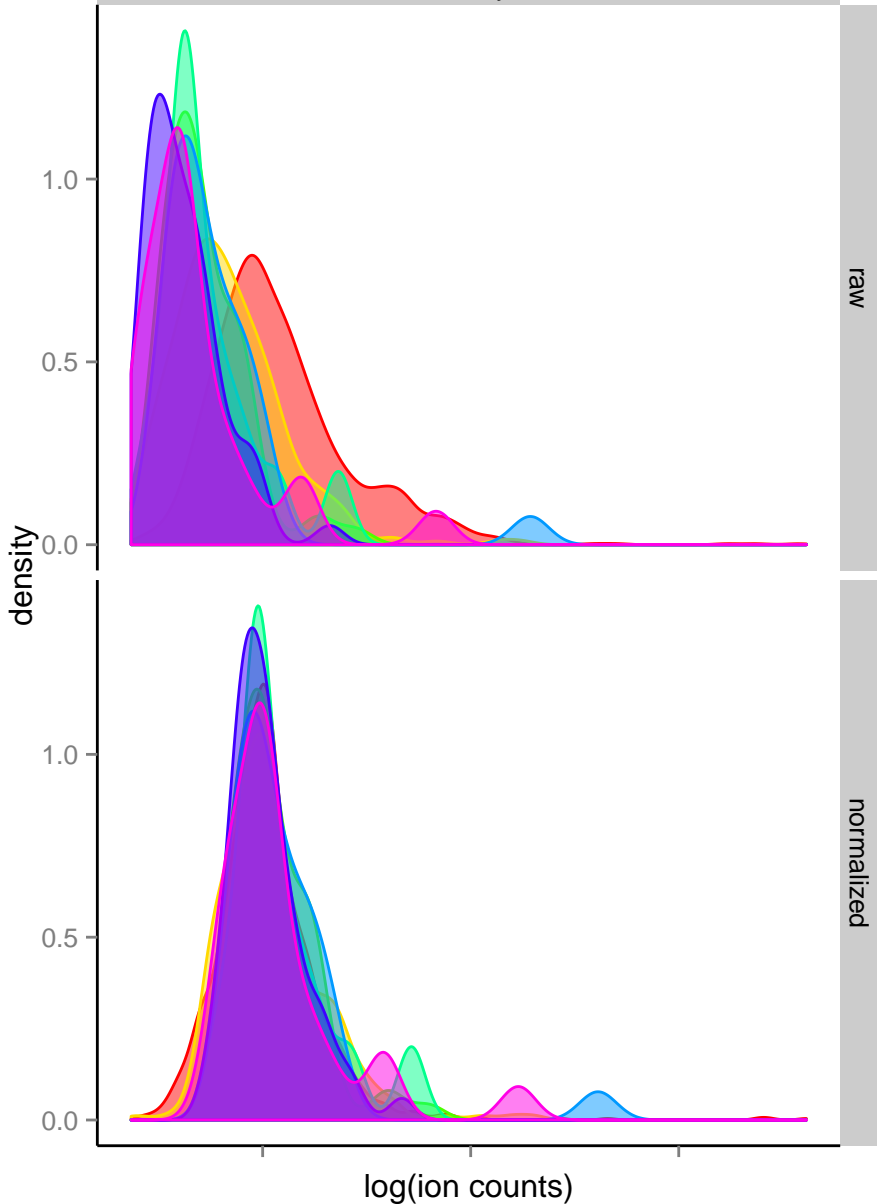

# pyroglutamine\*

runday

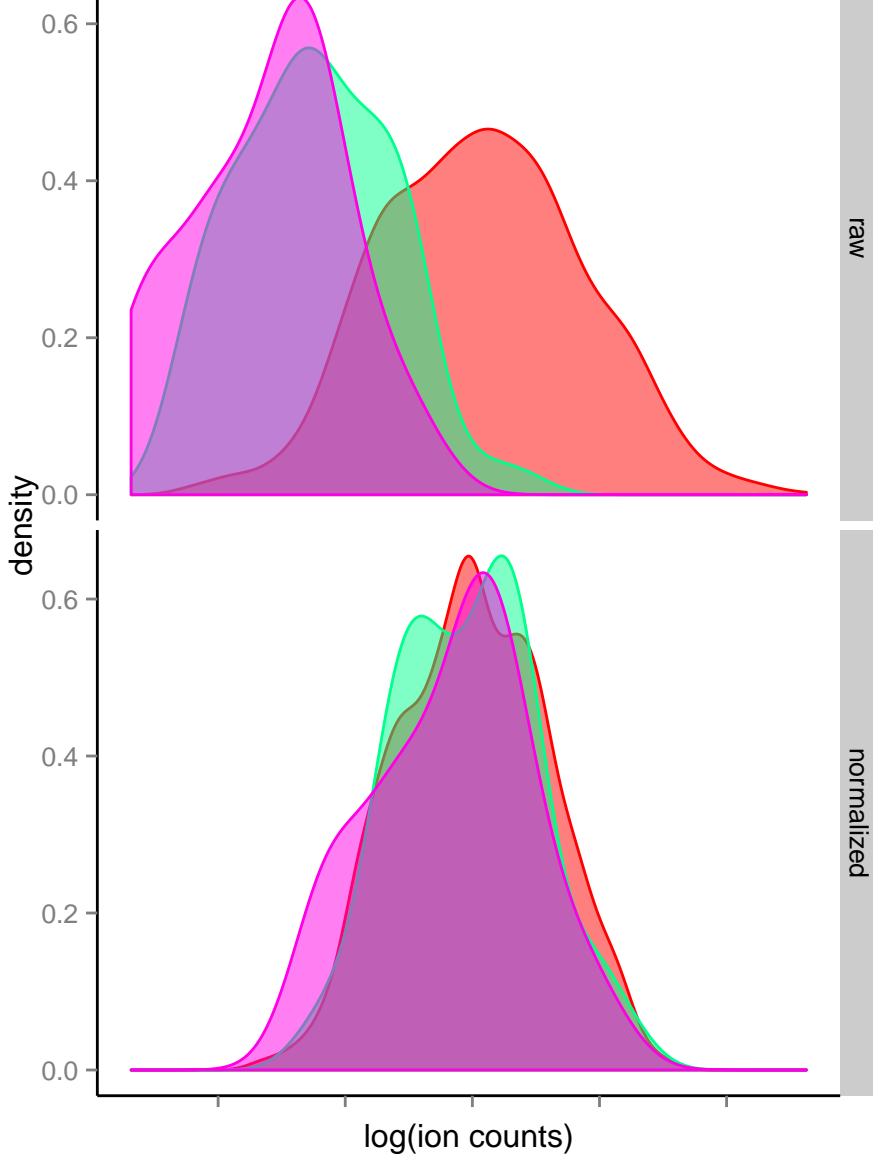

raw

normalized

**PLATFORMRUNDAY\_miss**





# pyroglutamylglycine

runday

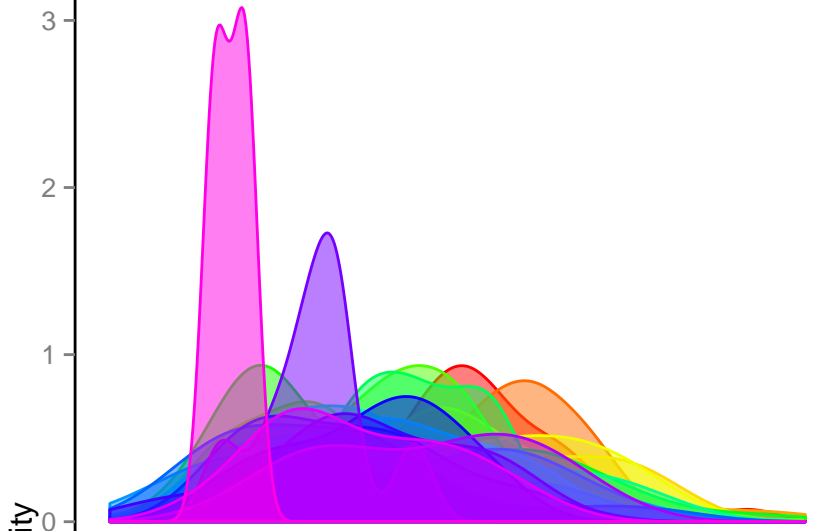

raw

## PLATFORMRUNDAY\_miss

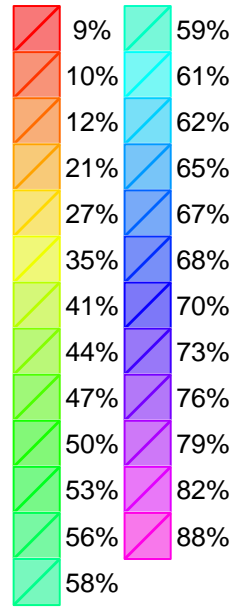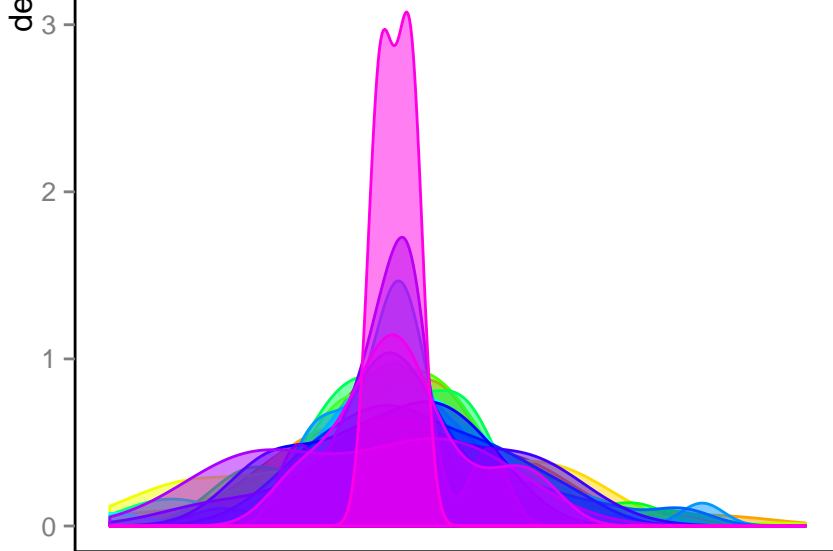

normalized

log(ion counts)

# pyruvate

runday

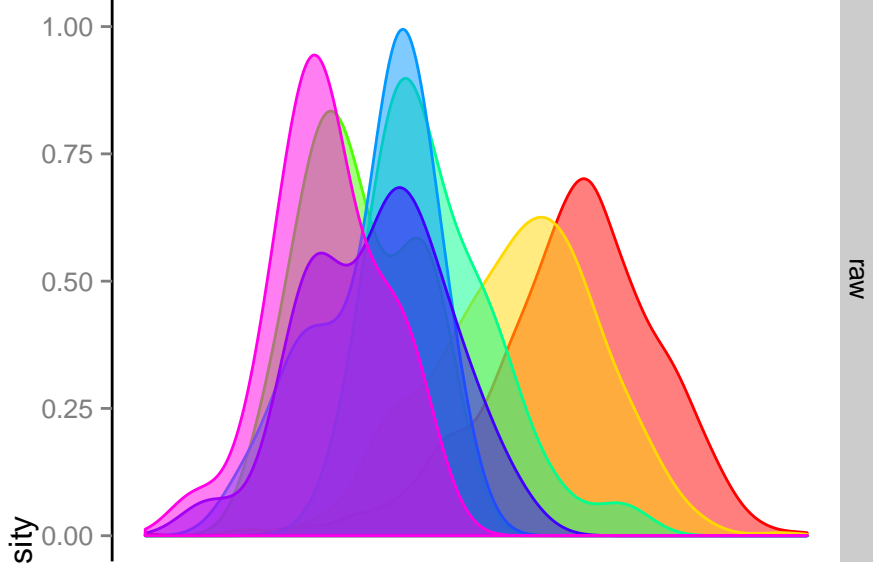

raw

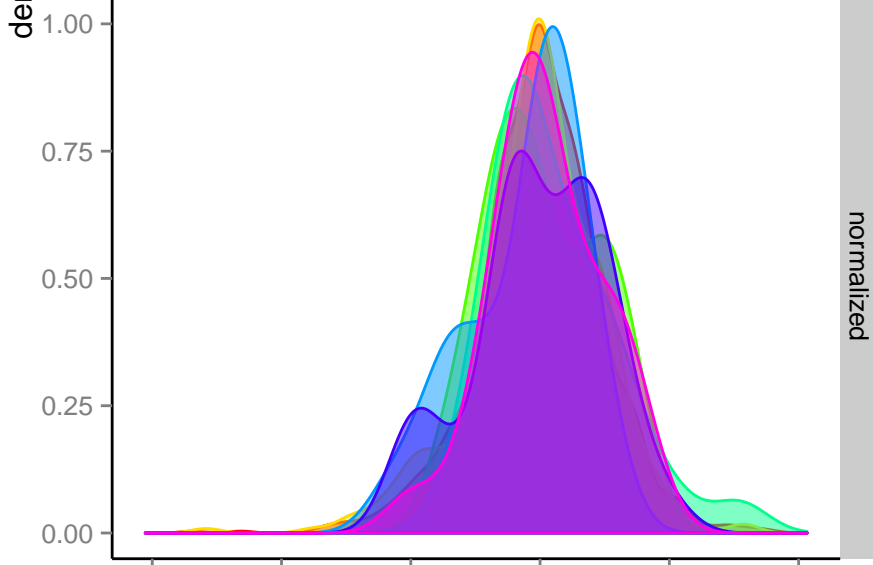

normalized

## PLATFORMRUNDAY\_miss

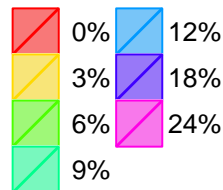

log(ion counts)

# quinate

runday

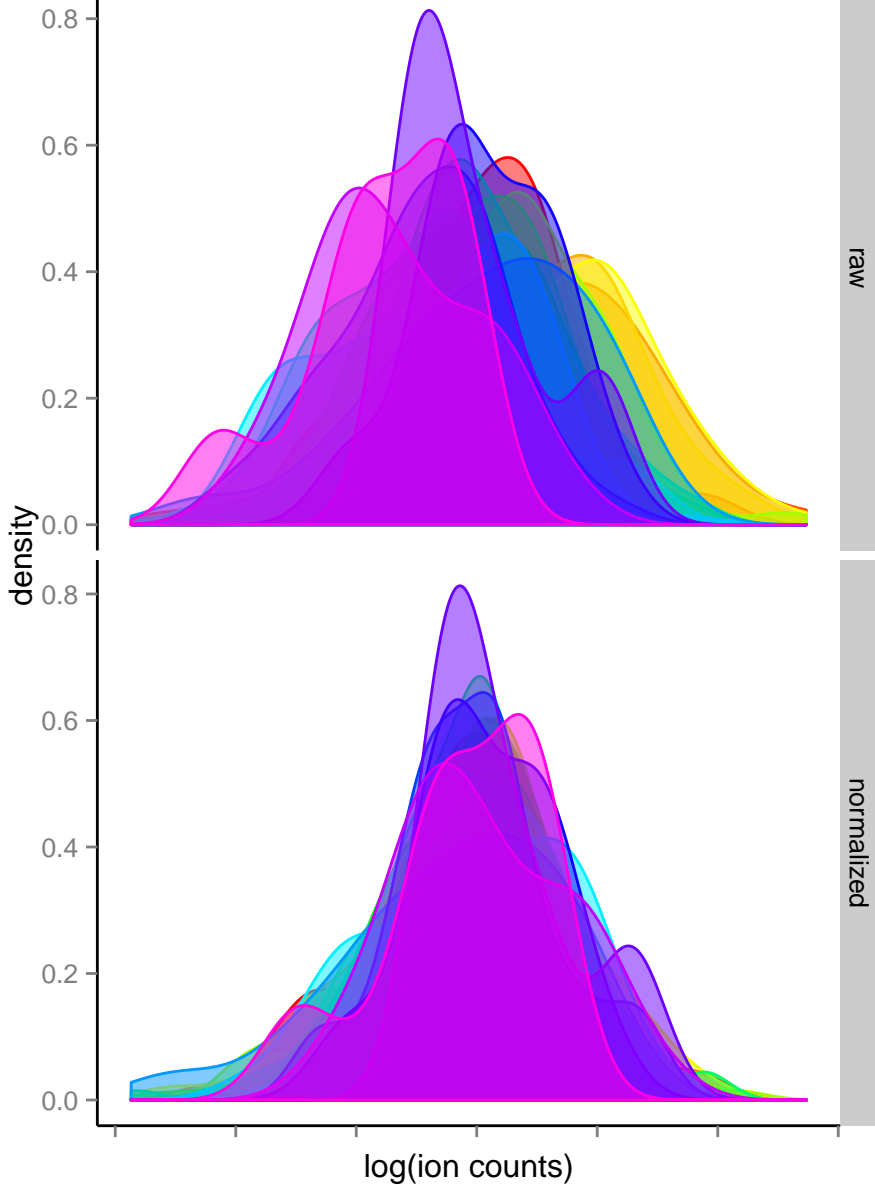

## PLATFORMRUNDAY\_miss

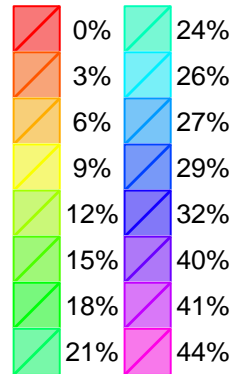

# riboflavin (Vitamin B2)

runday

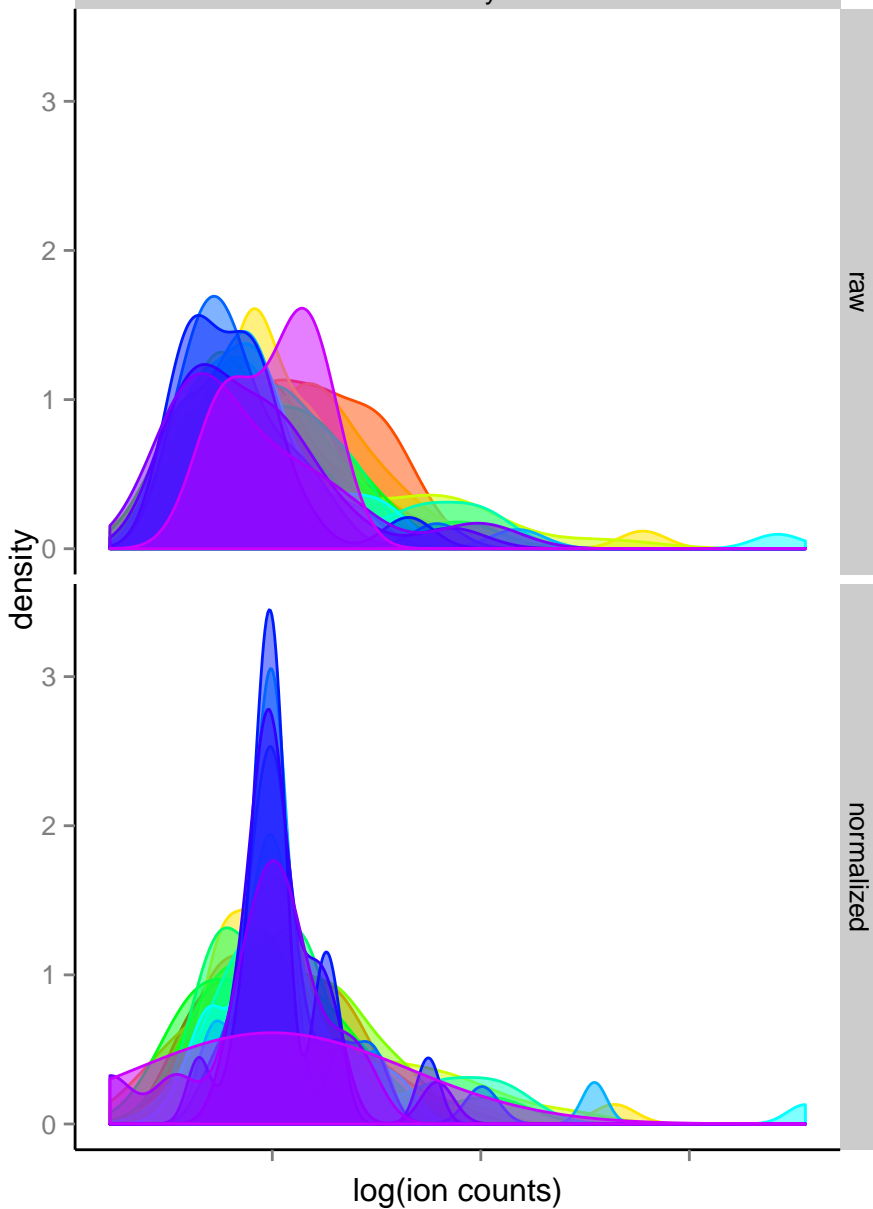

## PLATFORMRUNDAY\_miss

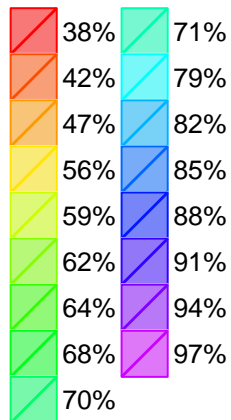

# saccharin

runday

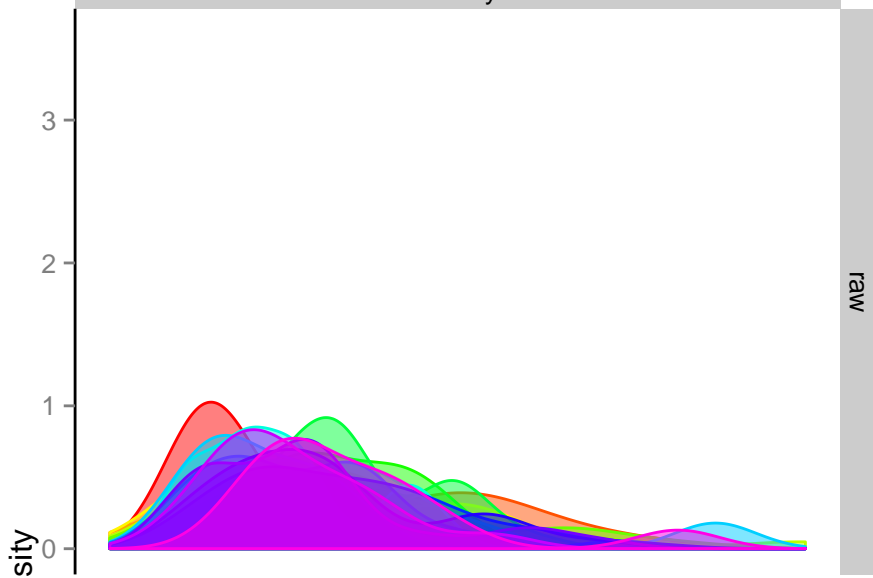

raw

## PLATFORMRUNDAY\_miss

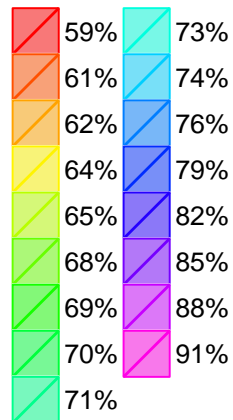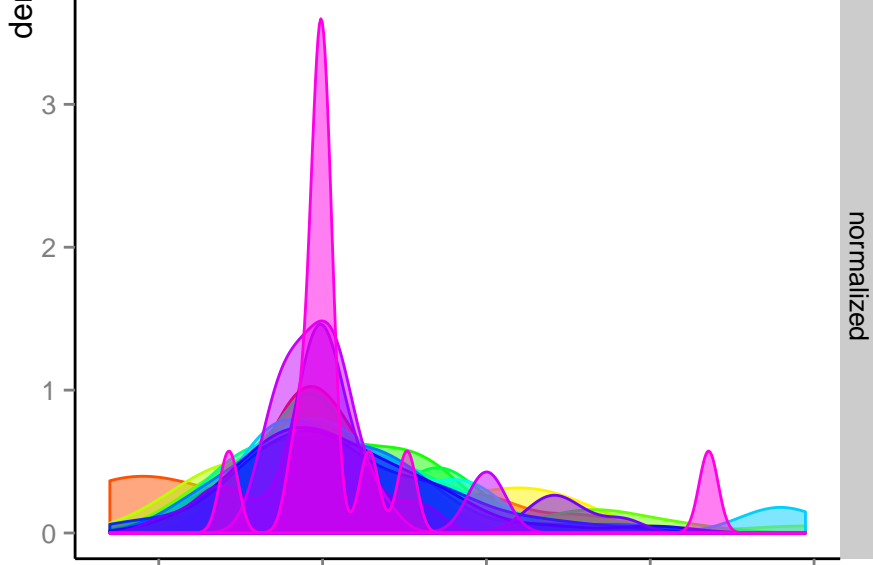

normalized

log(ion counts)

# salicylate

runday

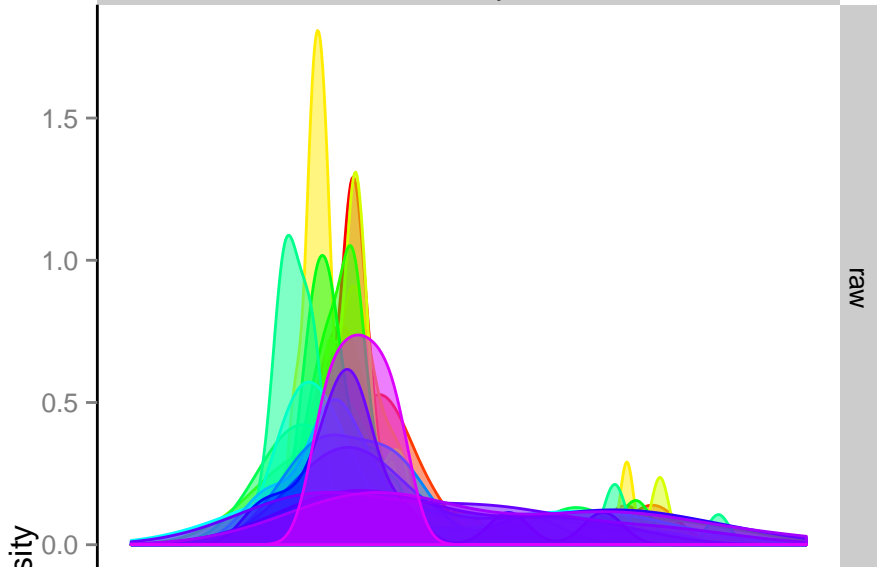

raw

## PLATFORMRUNDAY\_miss

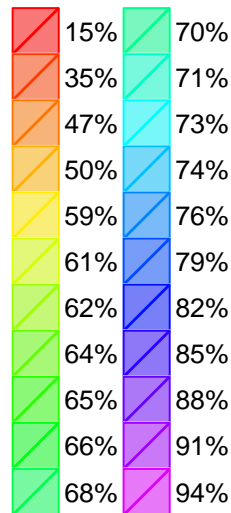

density

normalized

1.5  
1.0  
0.5  
0.0

1.5  
1.0  
0.5  
0.0

log(ion counts)

# salicylic glucuronide\*

runday

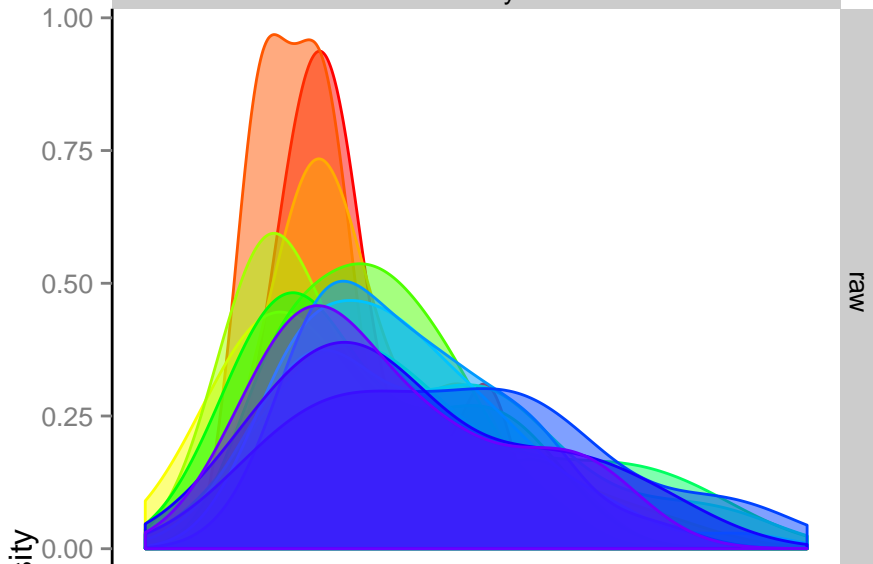

raw

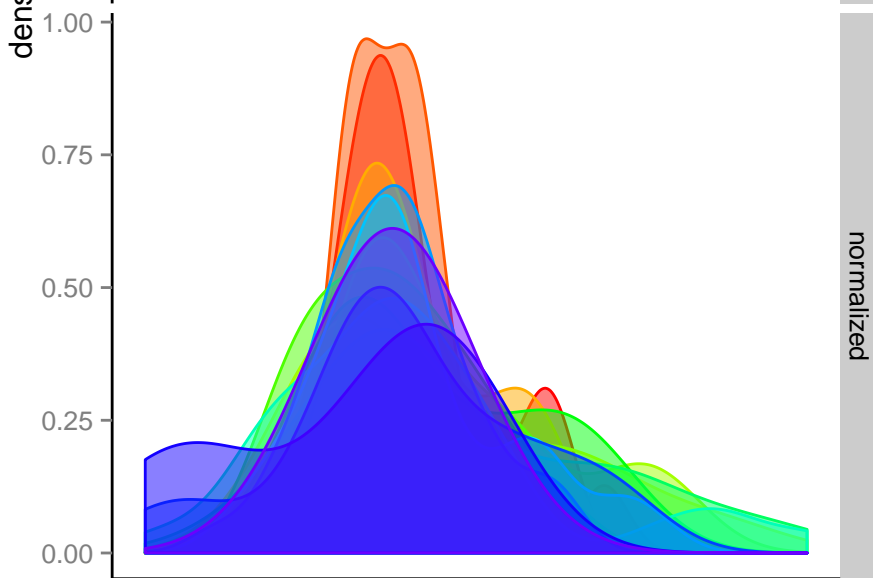

normalized

## PLATFORMRUNDAY\_miss

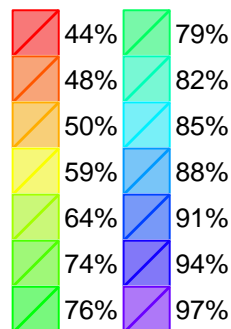

# scylo-inositol

runday

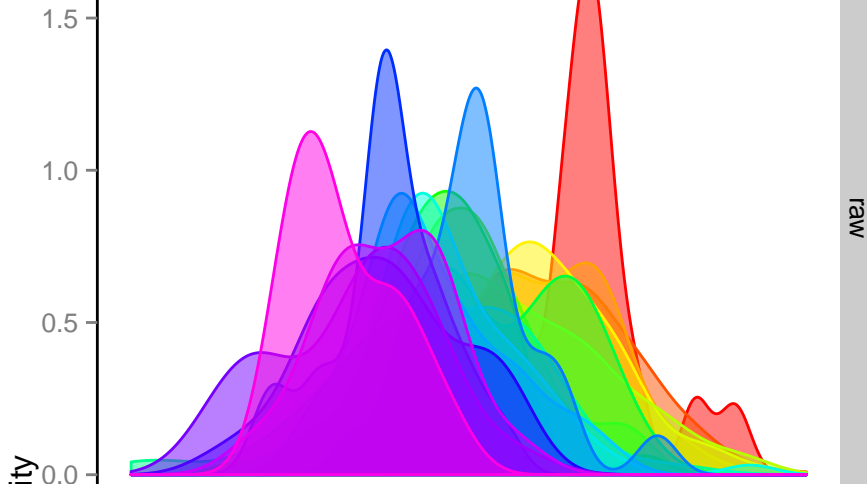

raw

**PLATFORMRUNDAY\_miss**

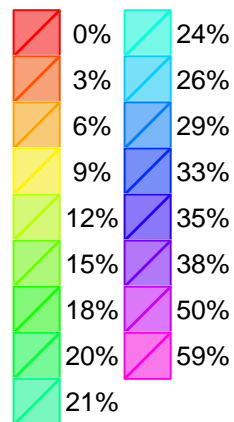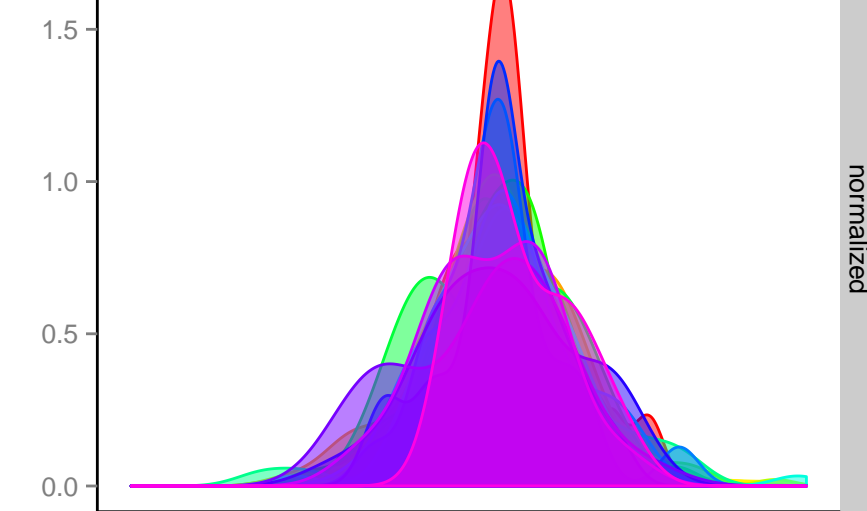

normalized

log(ion counts)



# sebacate (decanedioate)

runday

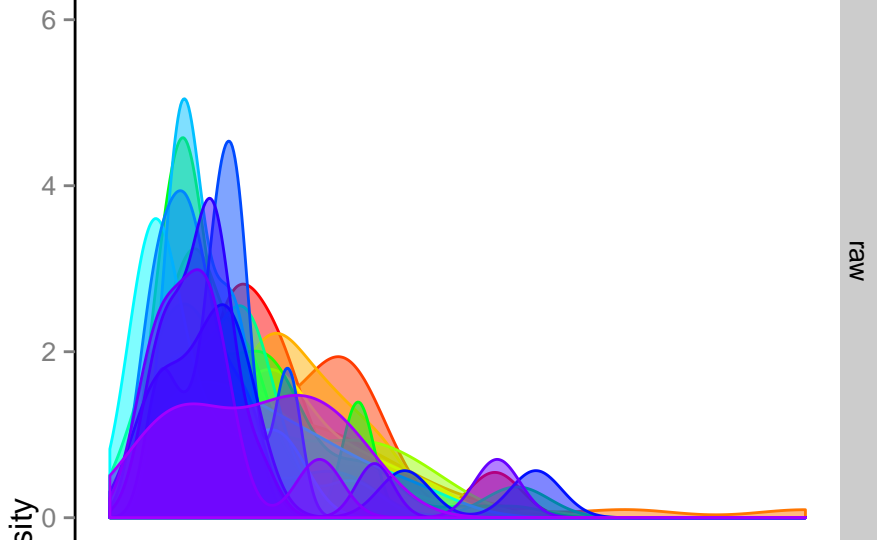

raw

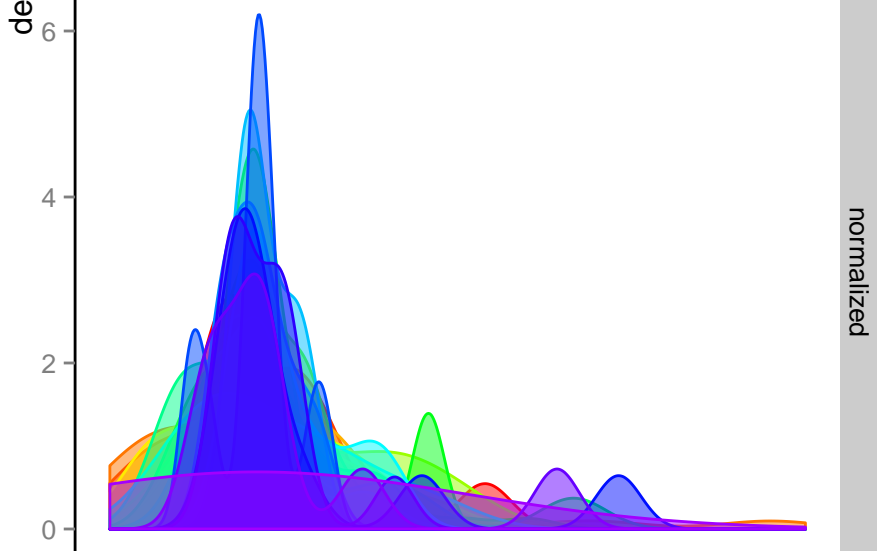

normalized

**PLATFORMRUNDAY\_miss**

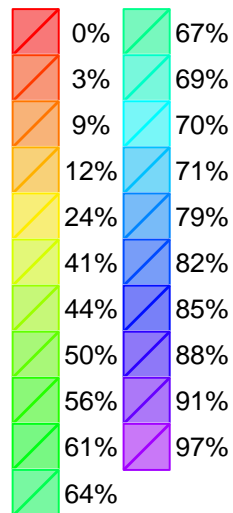

log(ion counts)

serine

runday

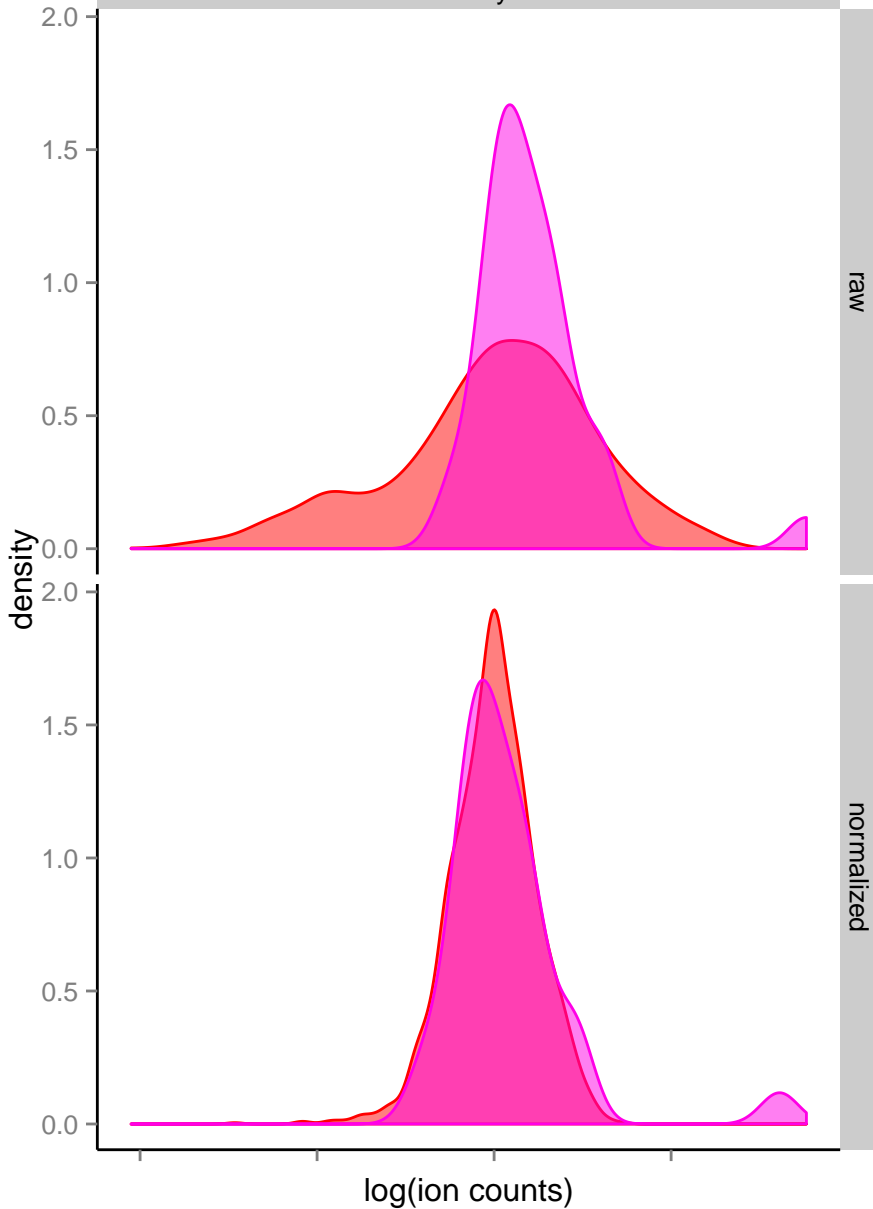

raw

normalized

PLATFORMRUNDAY\_miss

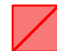

0%

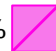

3%

log(ion counts)

# serotonin (5HT)

runday

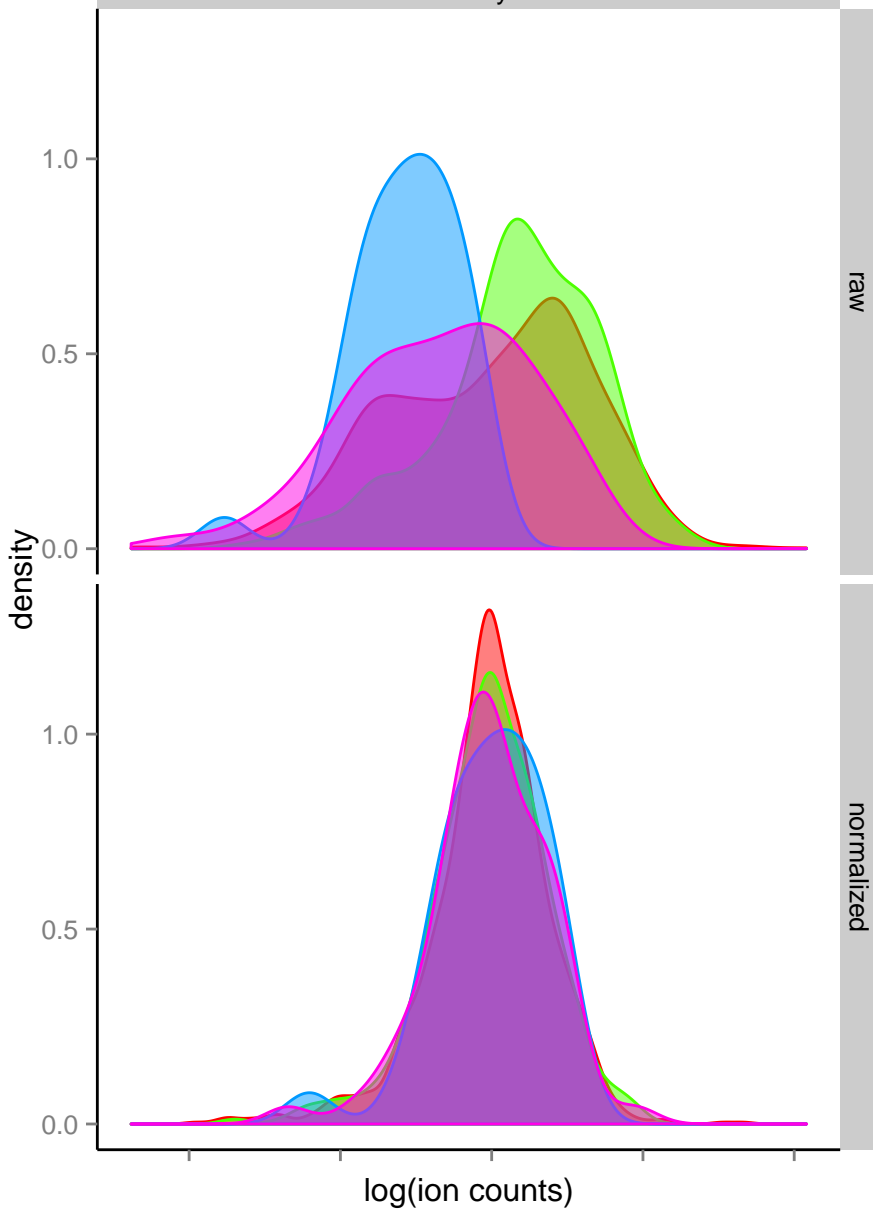

## PLATFORMRUNDAY\_miss

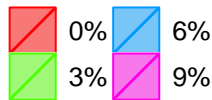

# stachydrine

runday

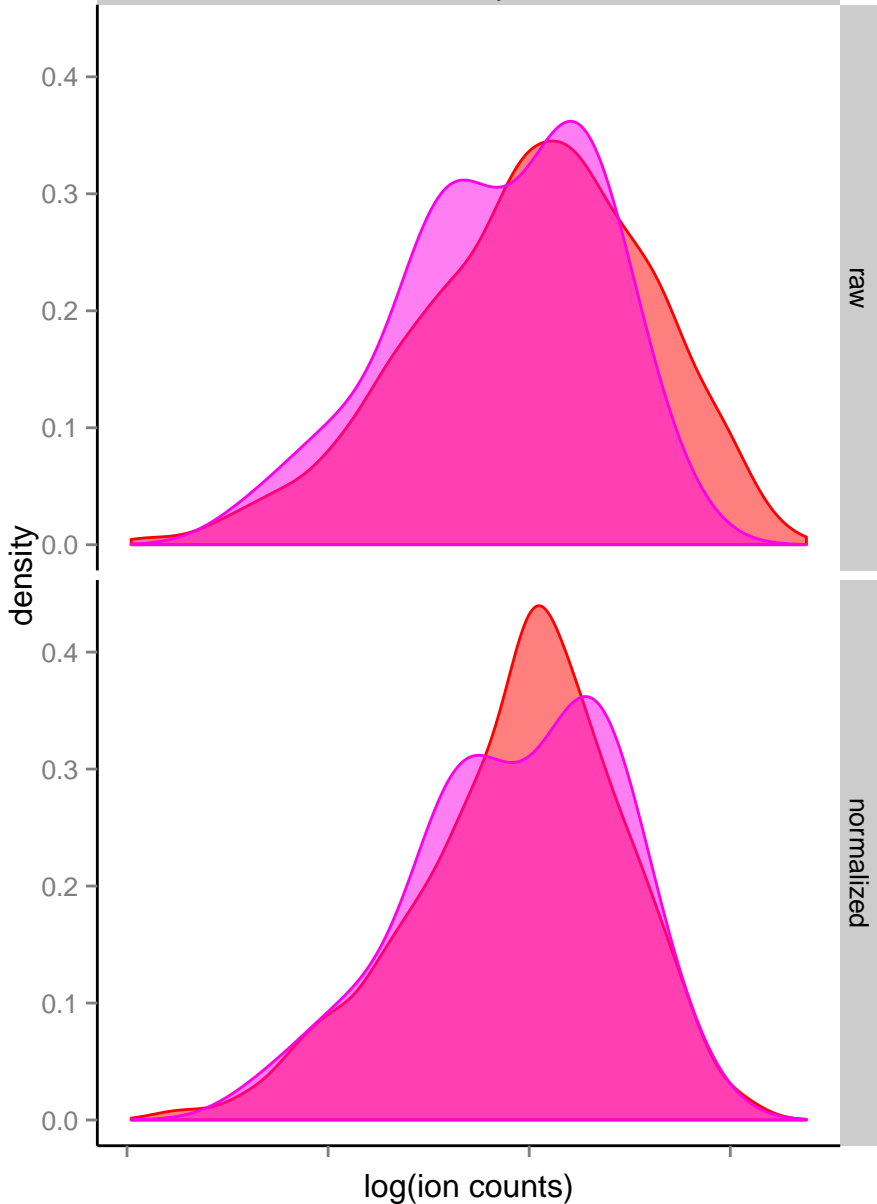

**PLATFORMRUNDAY\_miss**



0%

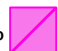

3%

raw

normalized

log(ion counts)

# stearate (18:0)

runday

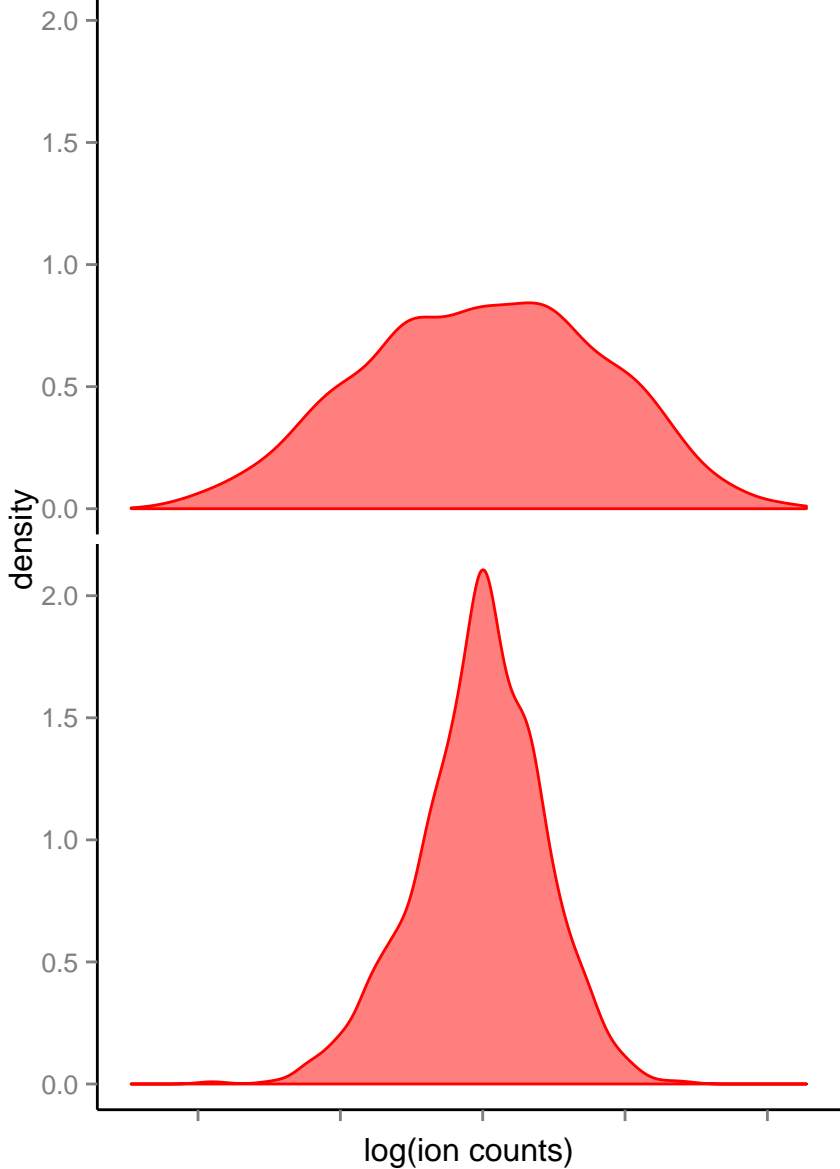

PLATFORMRUNDAY\_miss

0%

# stearidonate (18:4n3)

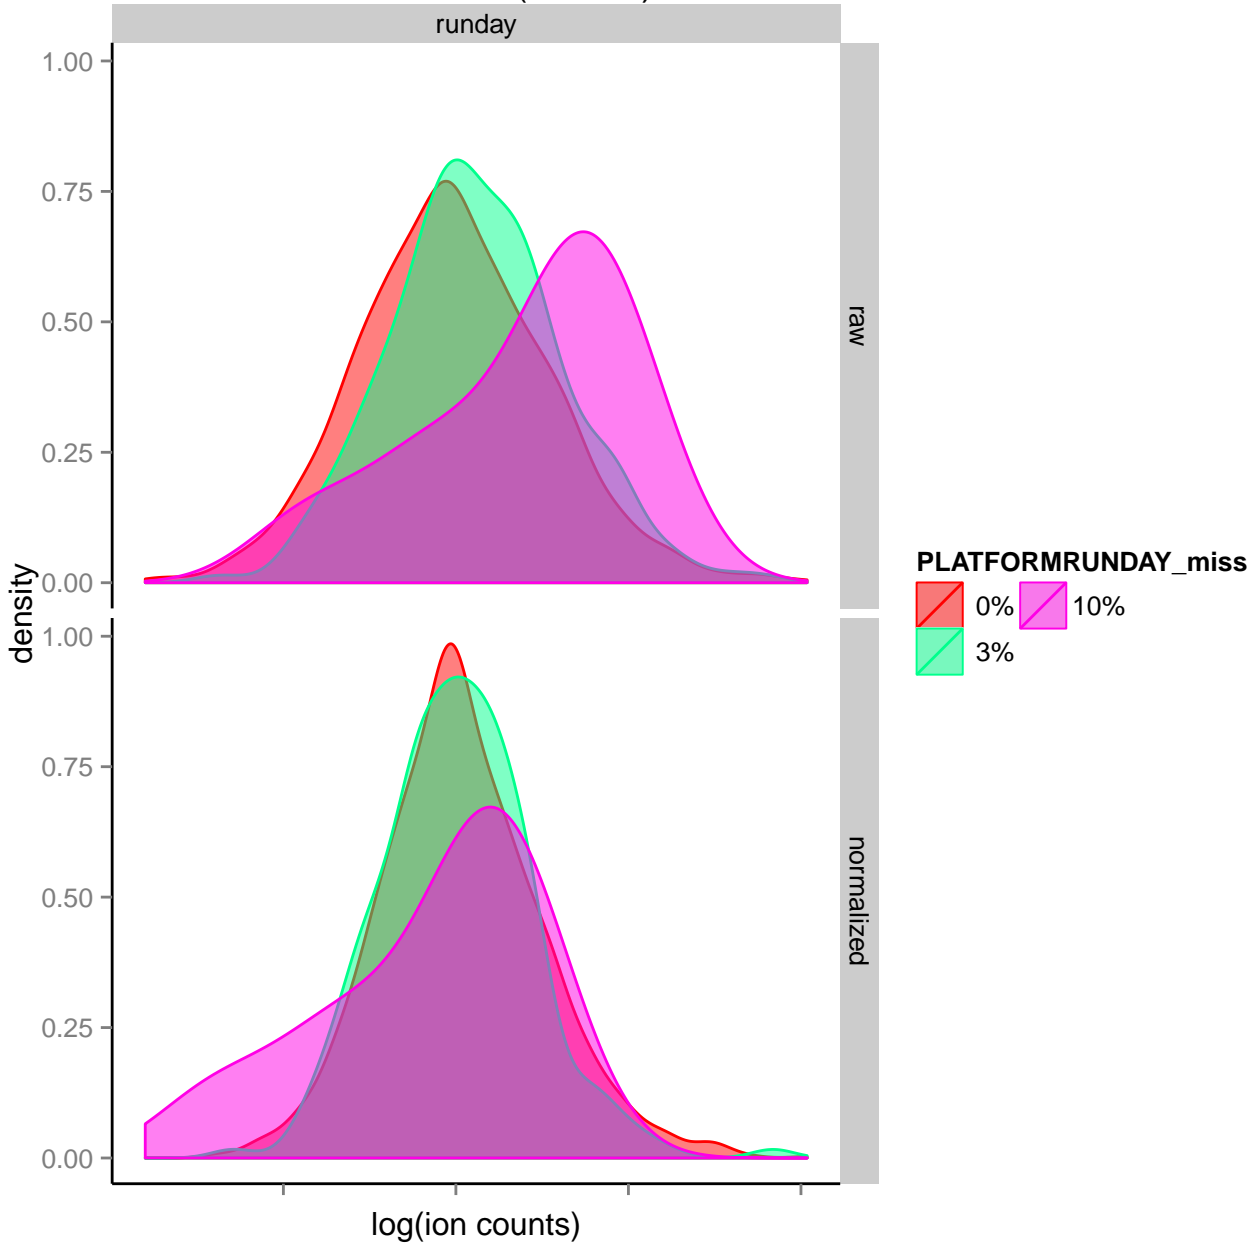

# stearoylcarnitine

runday

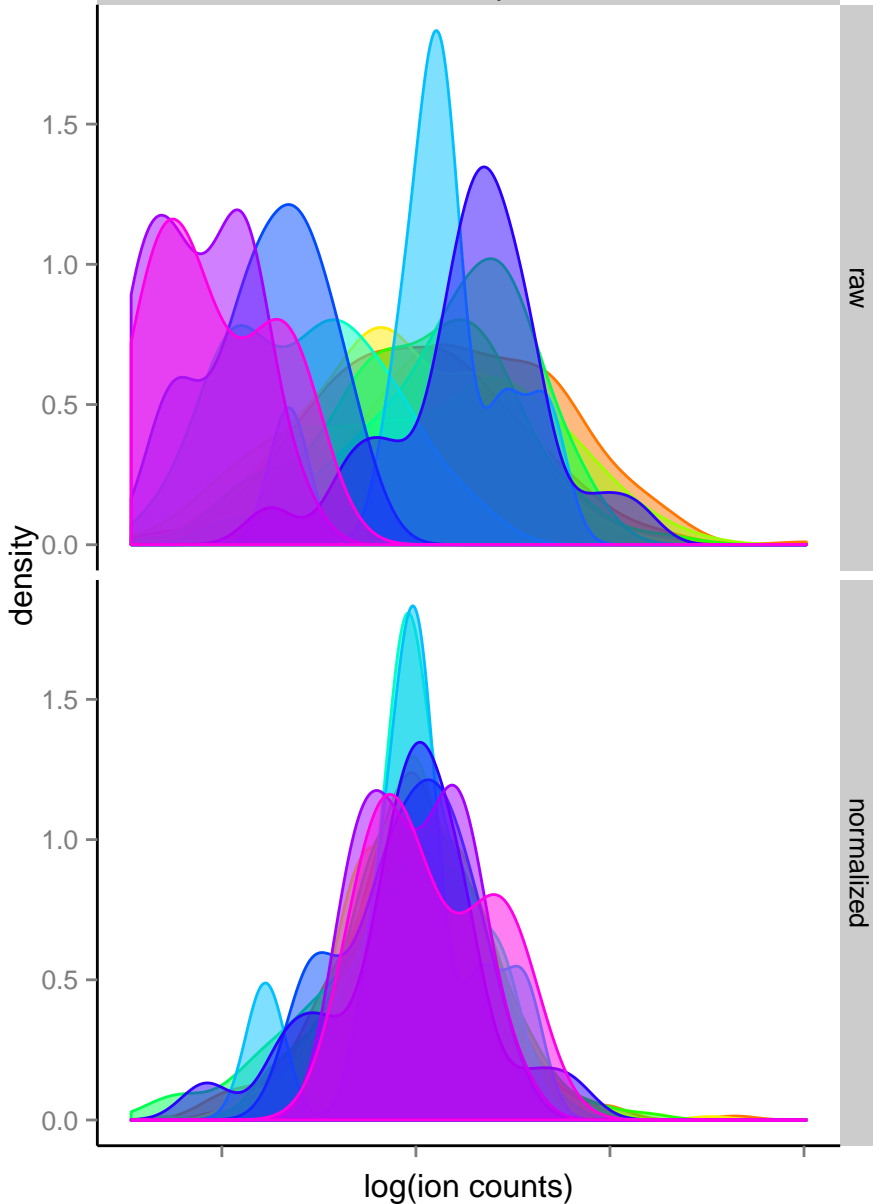

## PLATFORMRUNDAY\_miss

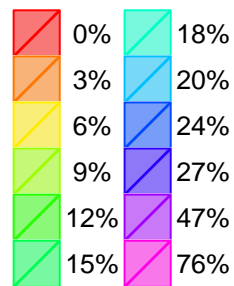

# succinylcarnitine

runday

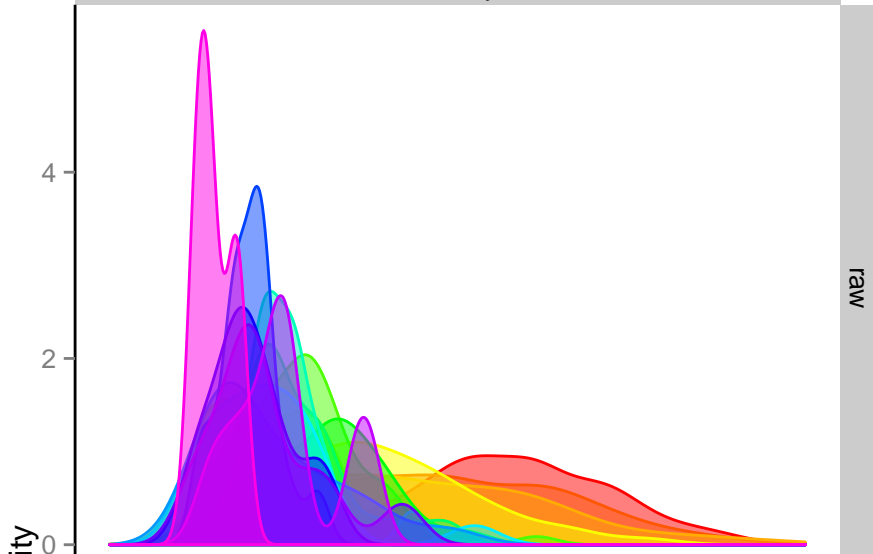

raw

## PLATFORMRUNDAY\_miss

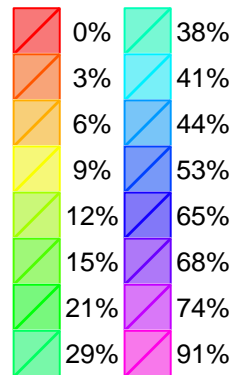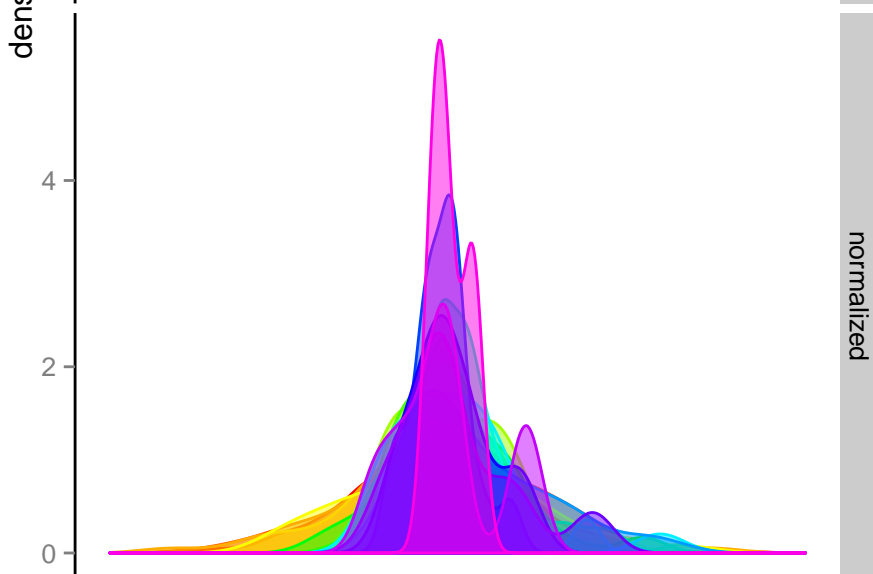

normalized

log(ion counts)



# taurochenodeoxycholate

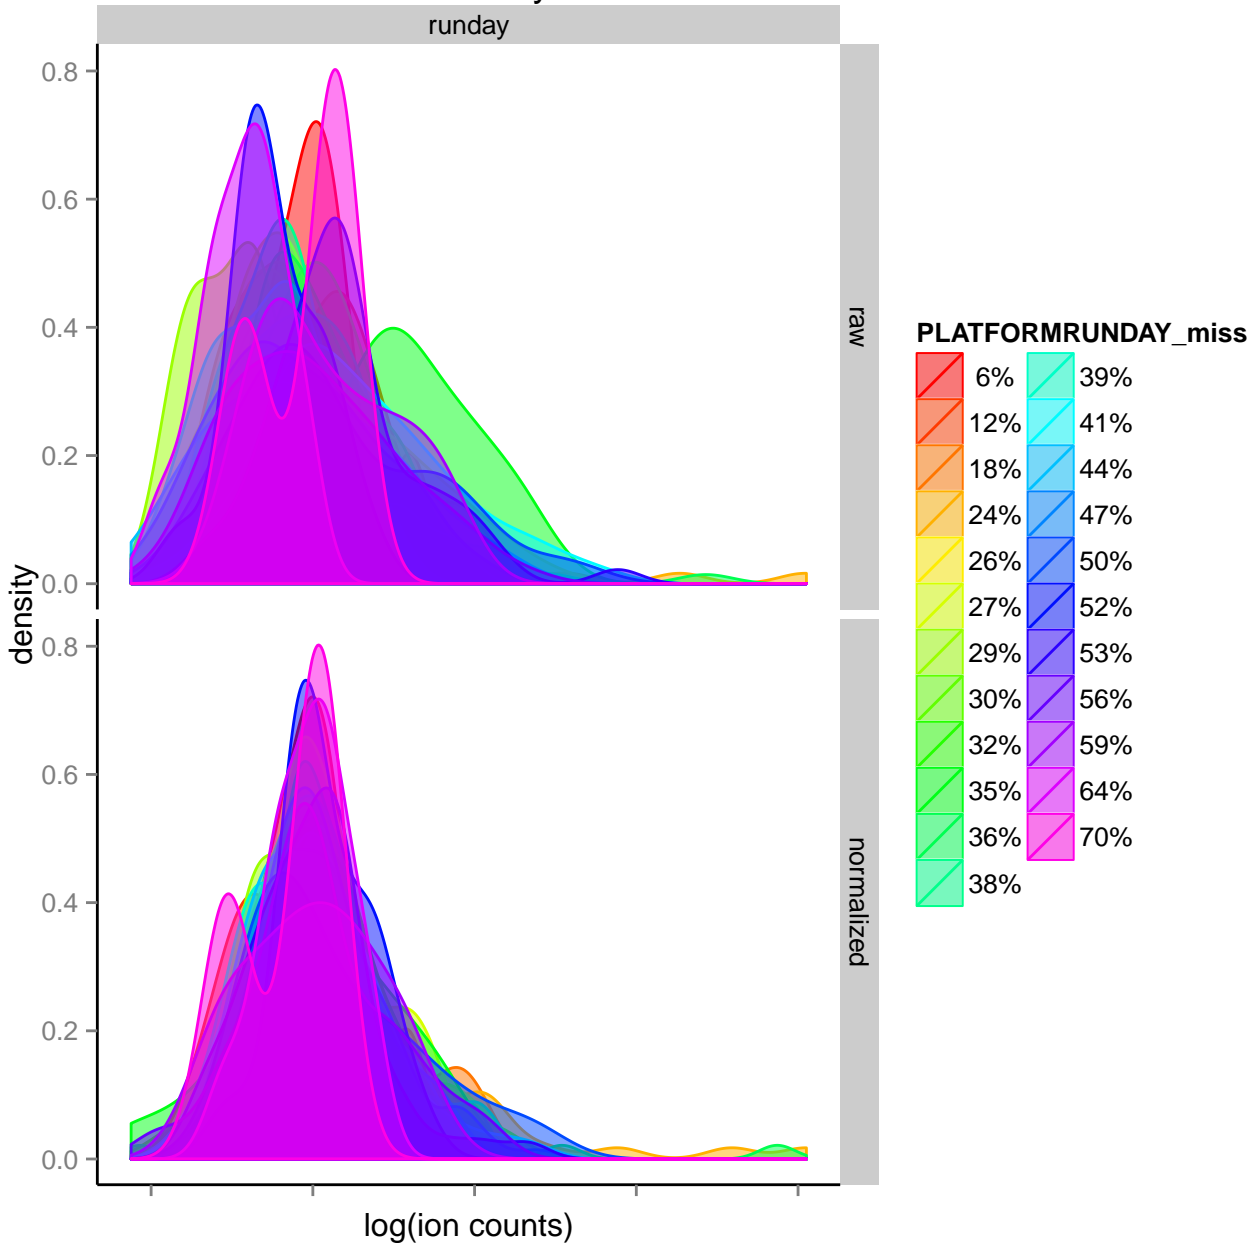

# taurocholate

runday

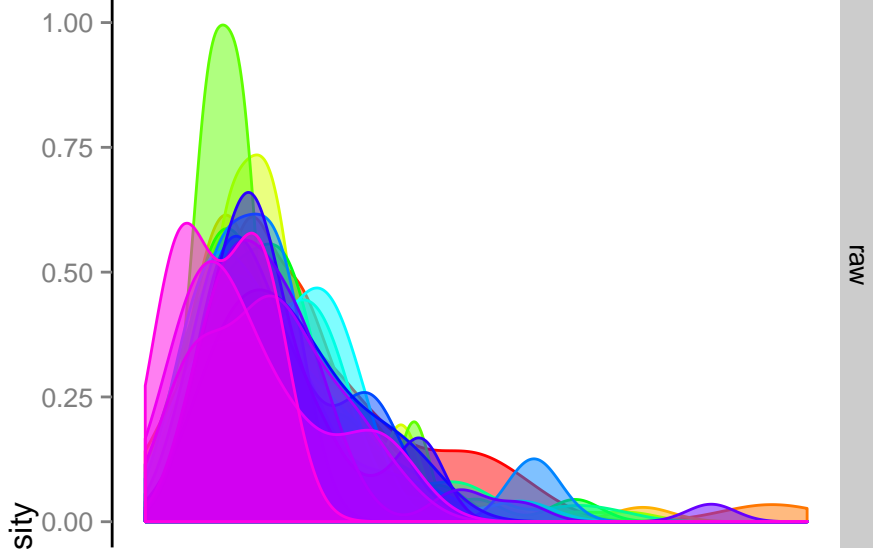

raw

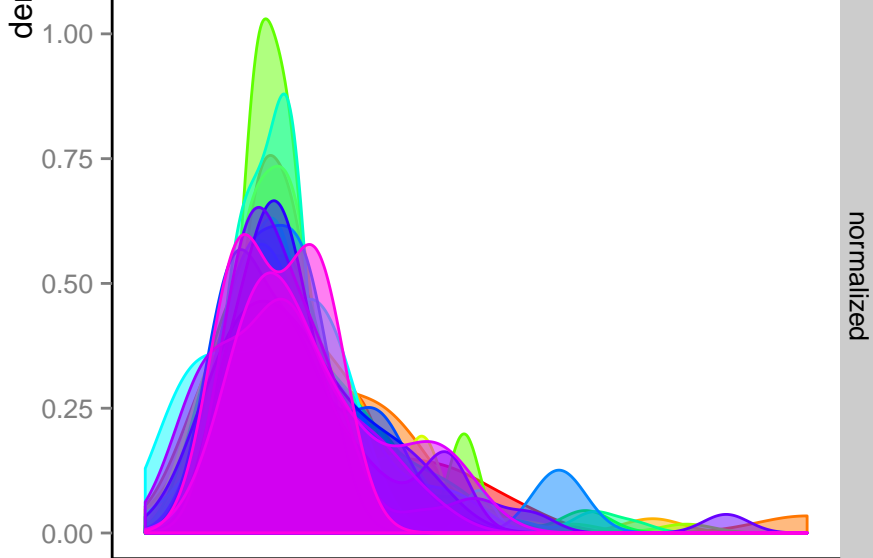

normalized

## PLATFORMRUNDAY\_miss

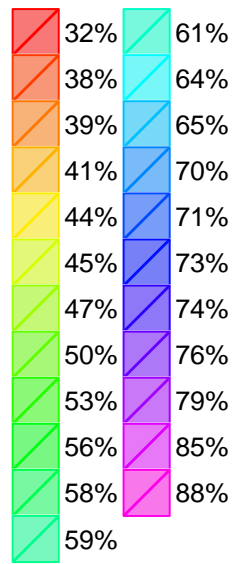

log(ion counts)

# taurodeoxycholate

runday

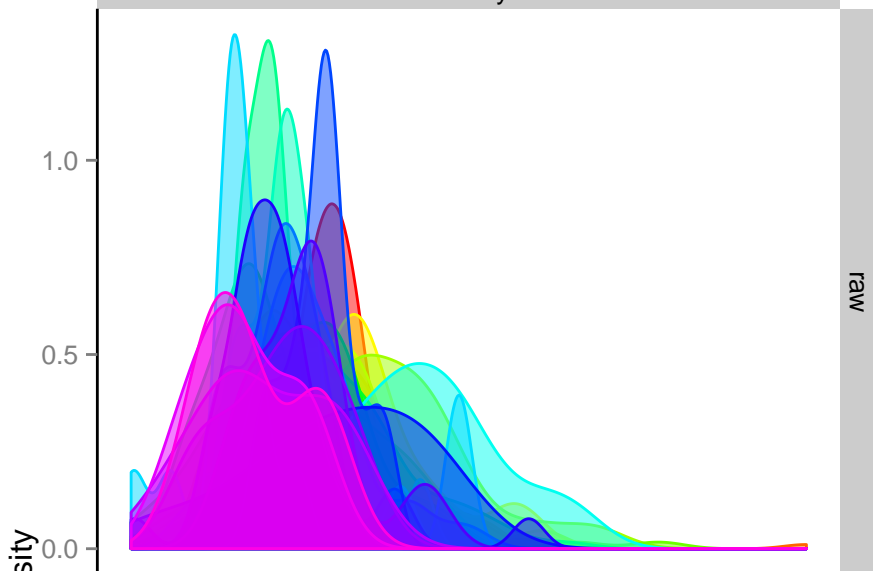

raw

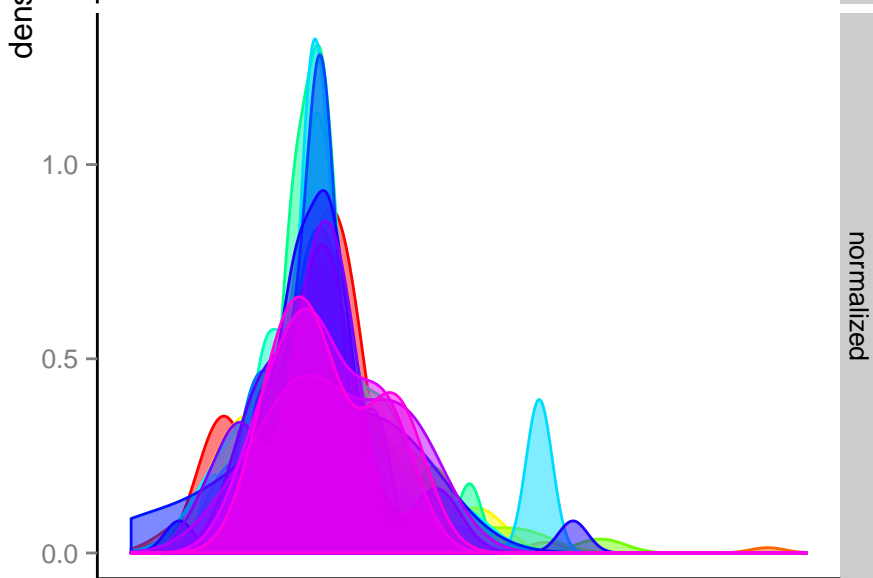

normalized

## PLATFORMRUNDAY\_miss

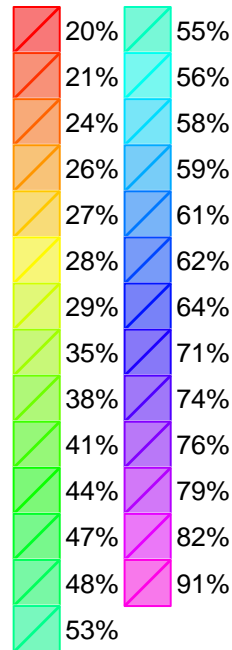

log(ion counts)

# tauro lithocholate 3-sulfate

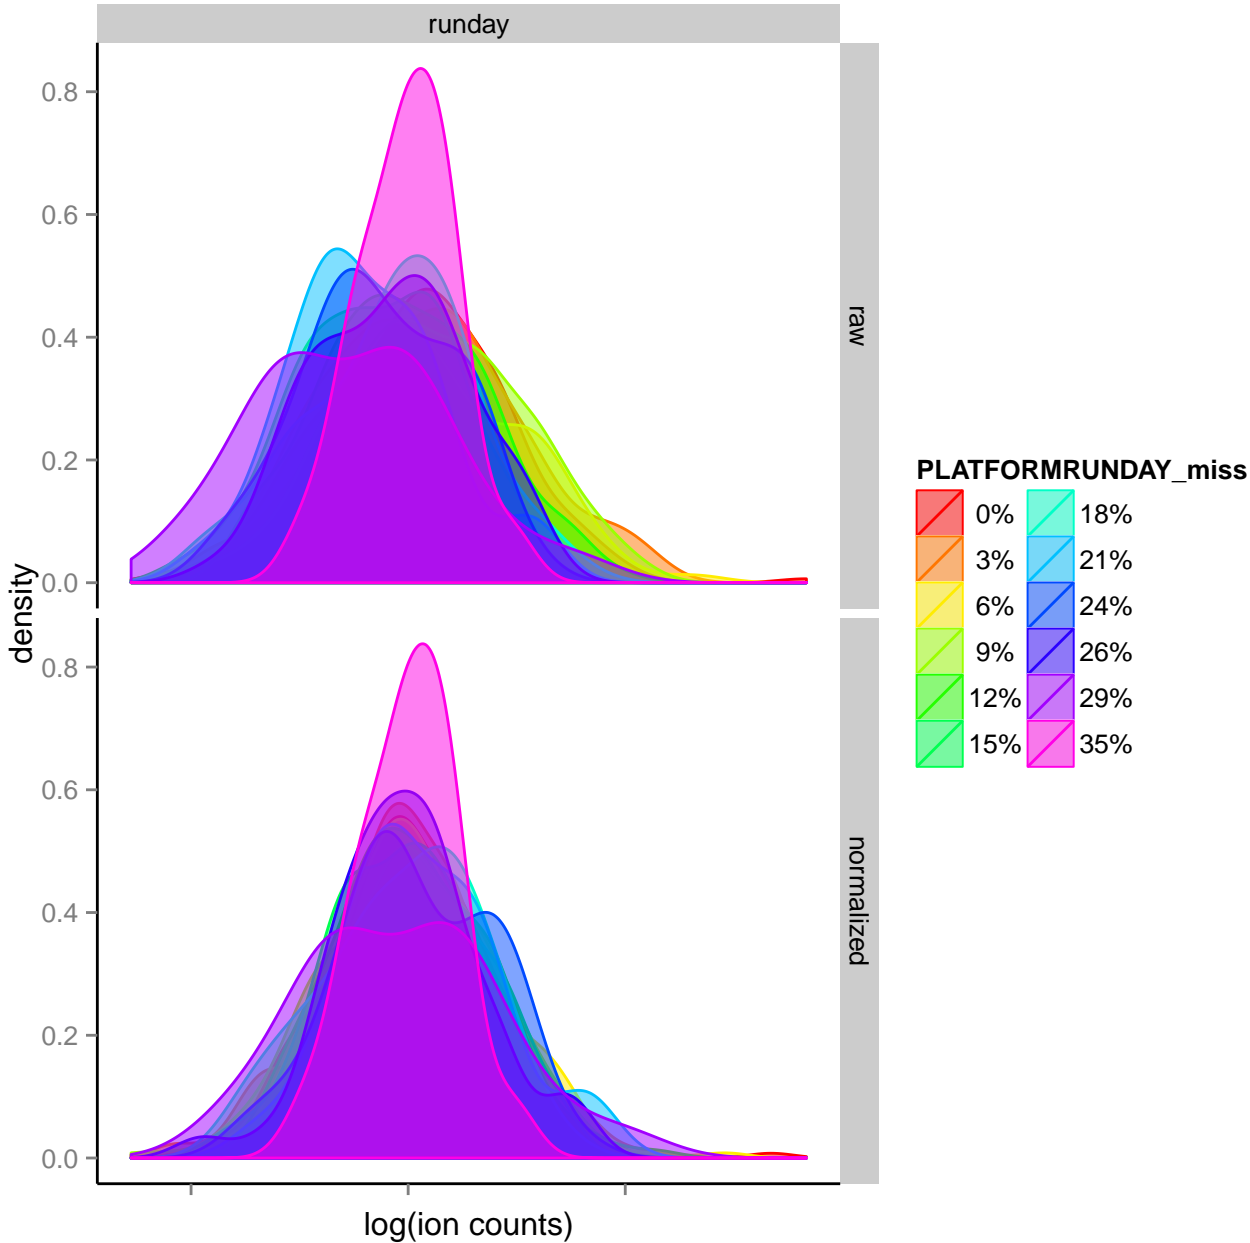

# tetradecanedioate

runday

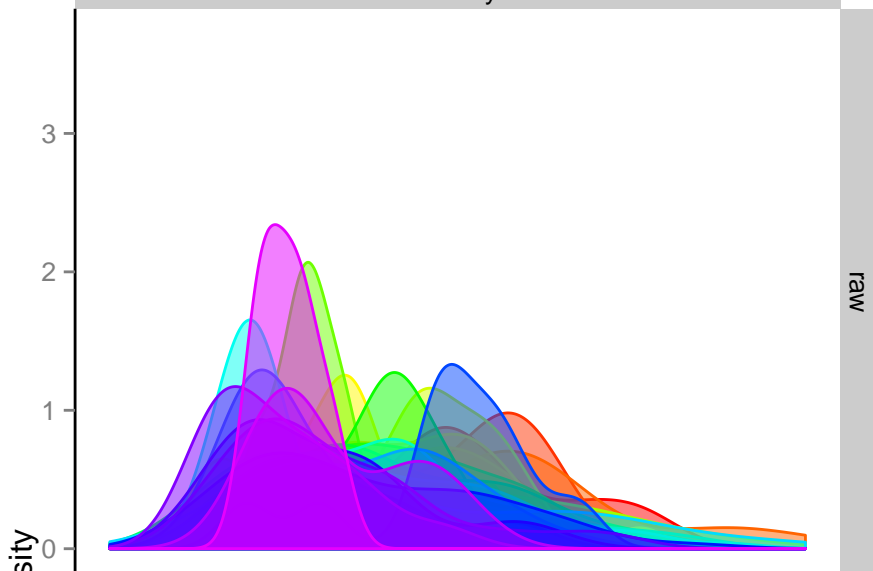

raw

## PLATFORMRUNDAY\_miss

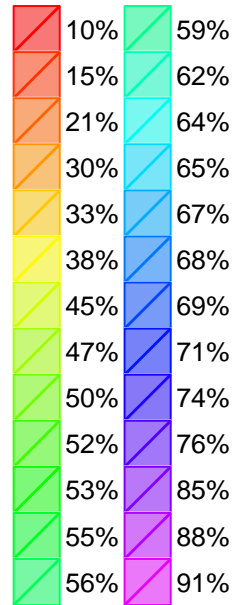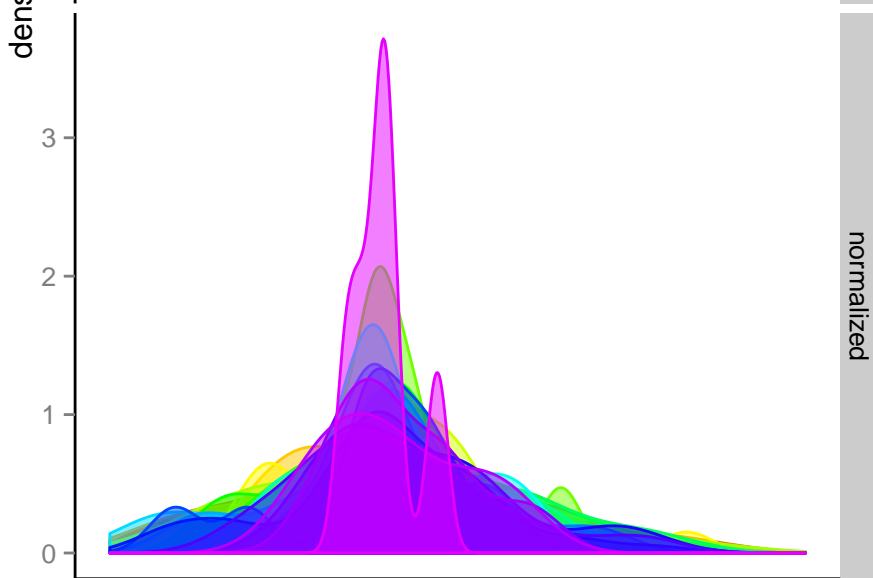

normalized

log(ion counts)

# theobromine

runday

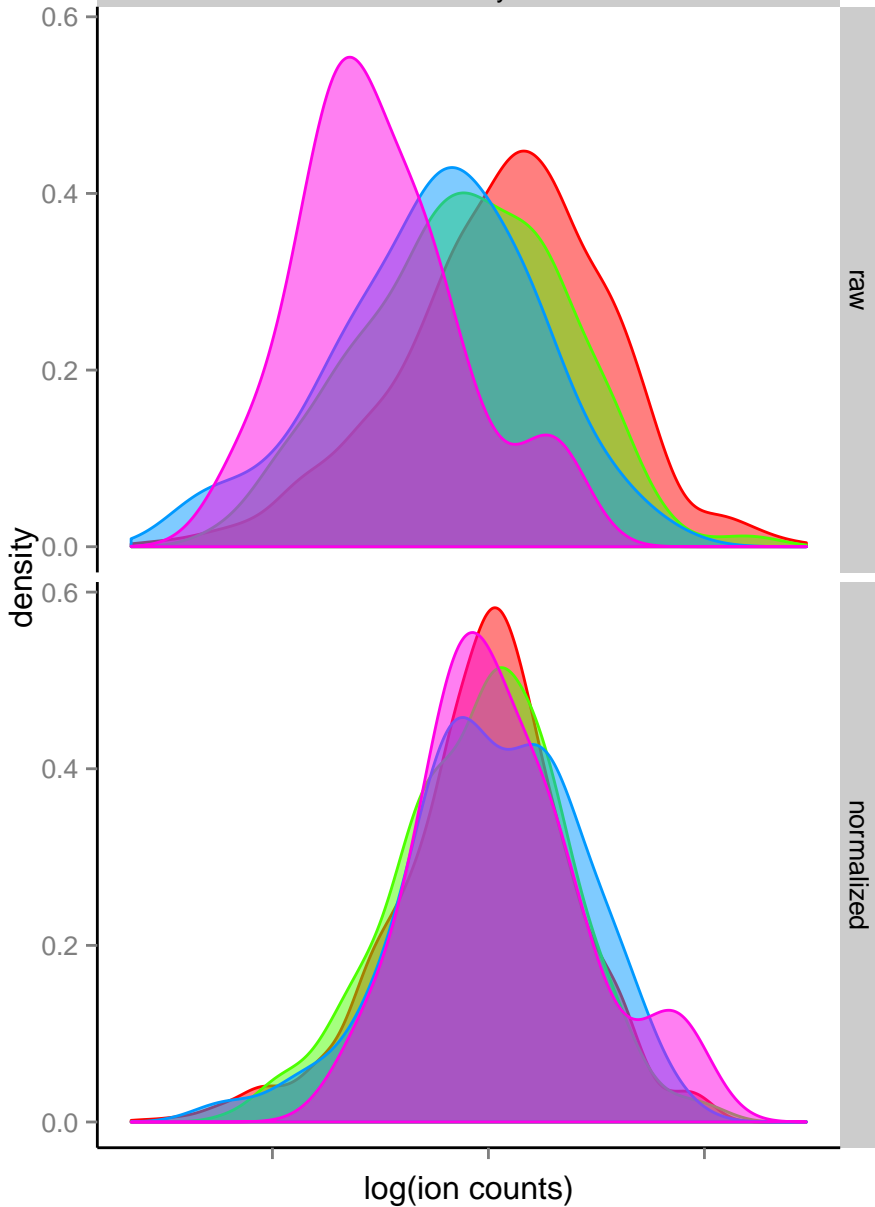

**PLATFORMRUNDAY\_miss**

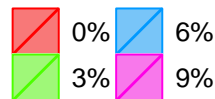

# theophylline

runday

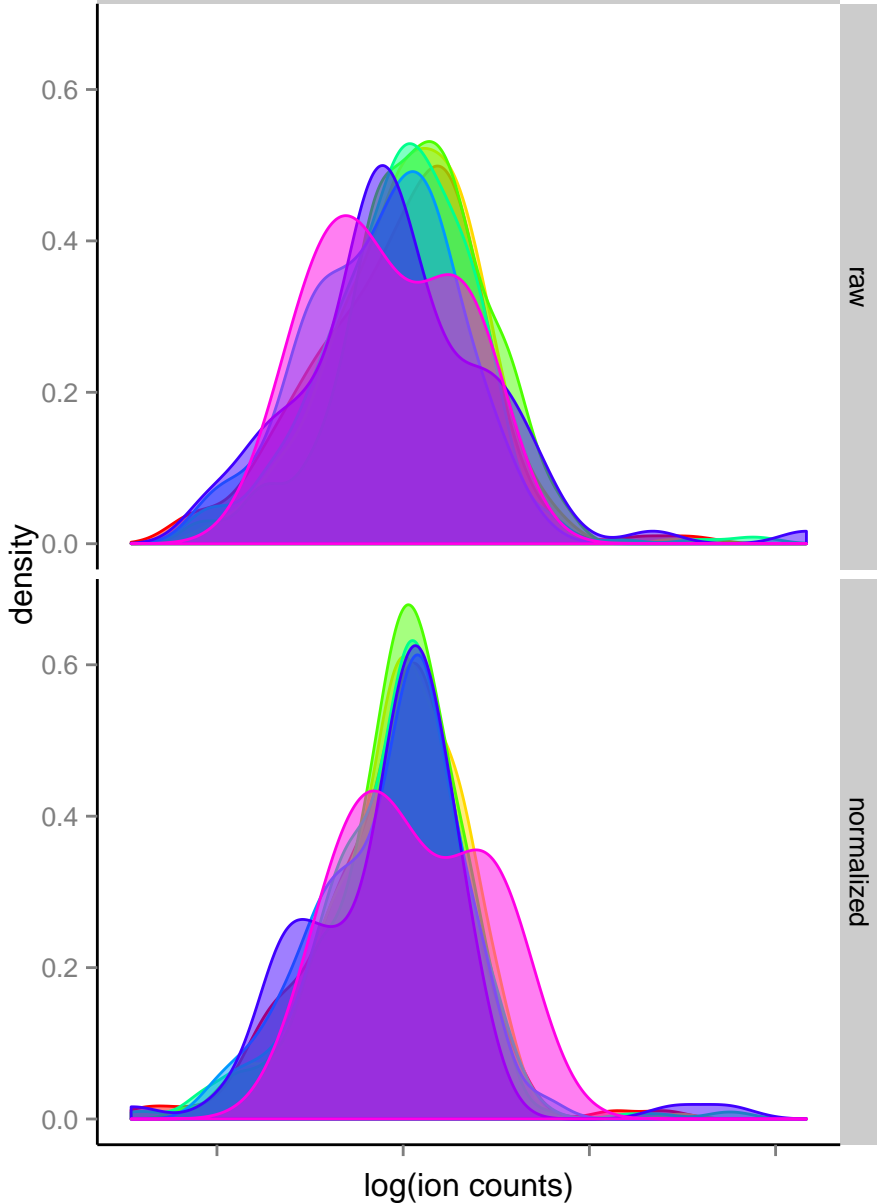

raw

normalized

## PLATFORMRUNDAY\_miss

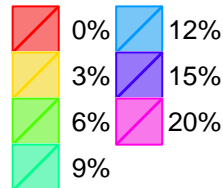

# threitol

runday

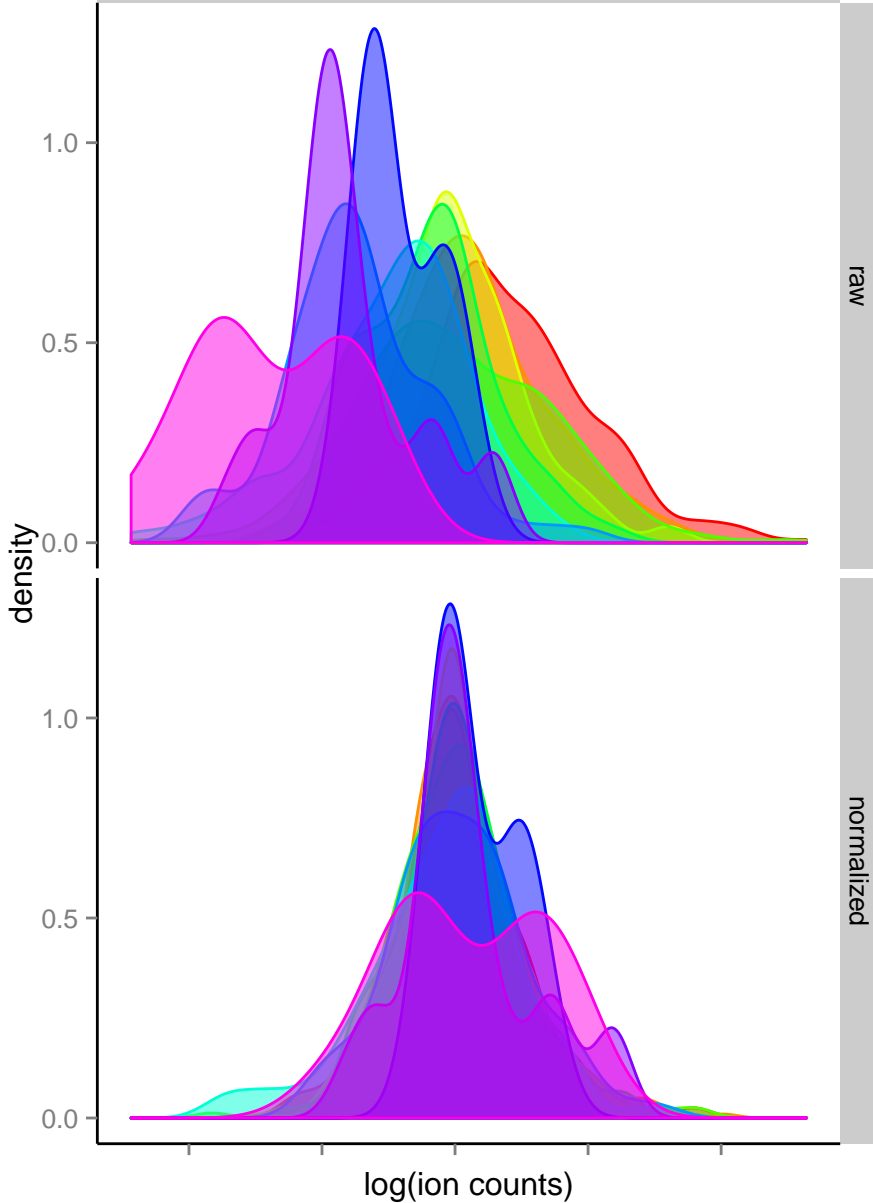

raw

normalized

## PLATFORMRUNDAY\_miss

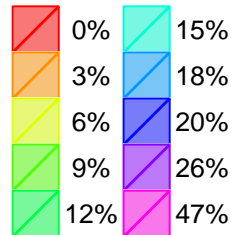



# threonate

runday

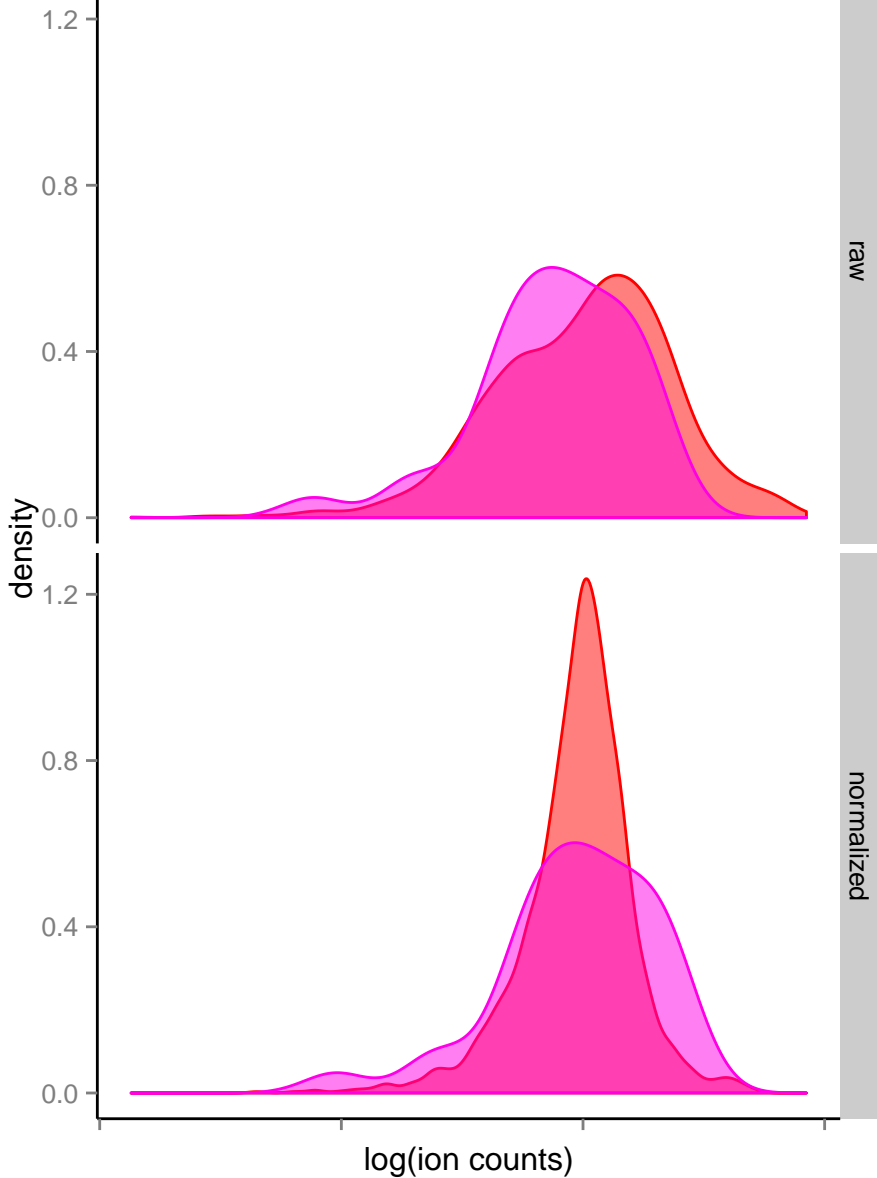

raw

normalized

**PLATFORMRUNDAY\_miss**



0%

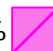

3%

log(ion counts)

# threonine

runday

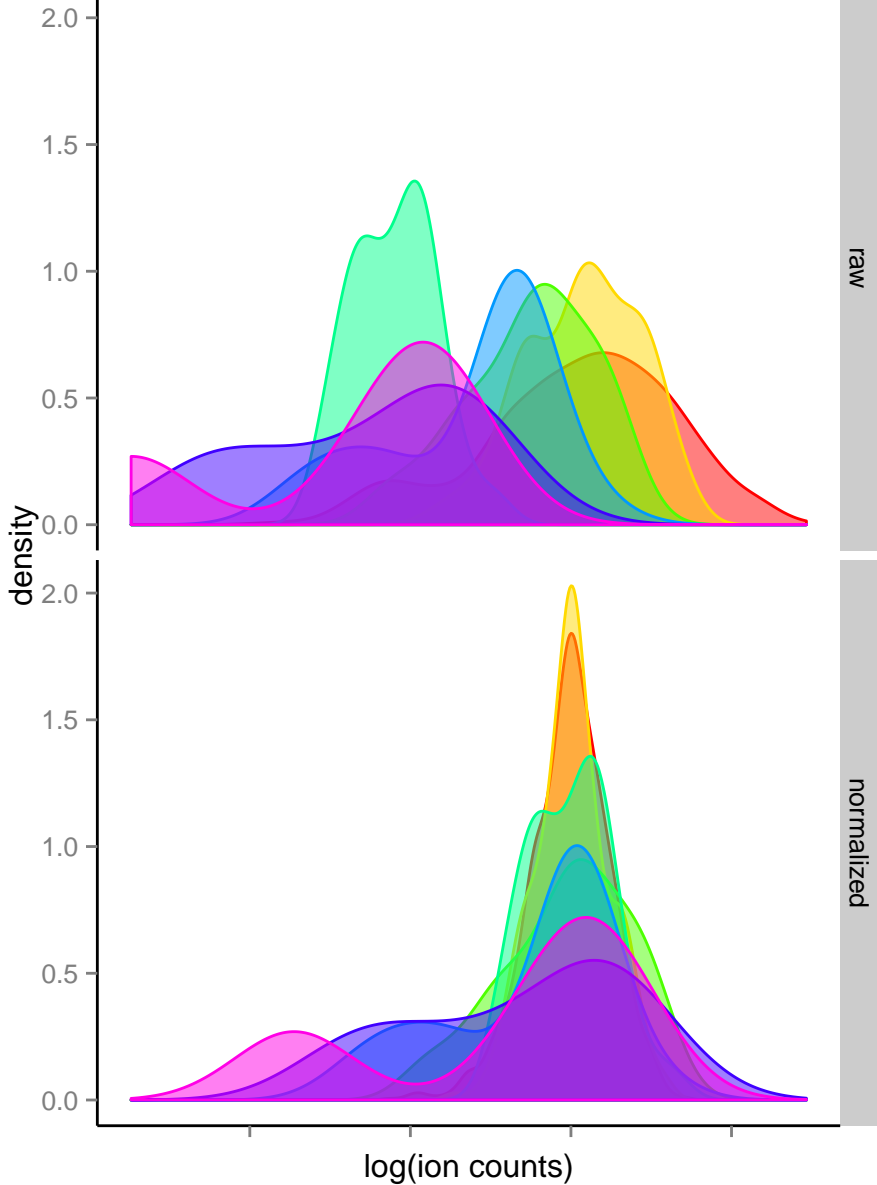

# X-18601

runday

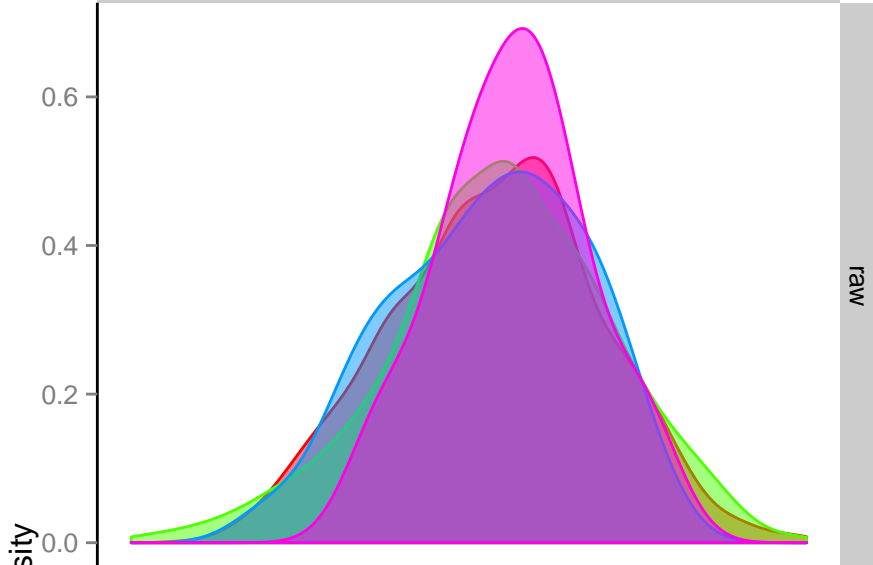

raw

**PLATFORMRUNDAY\_miss**

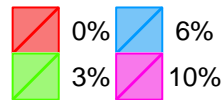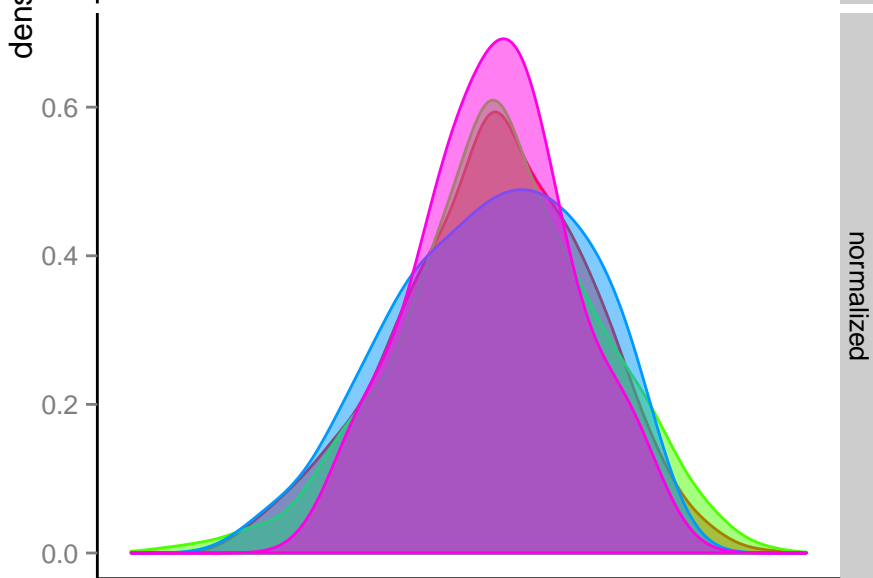

normalized

log(ion counts)

# thymol sulfate

runday

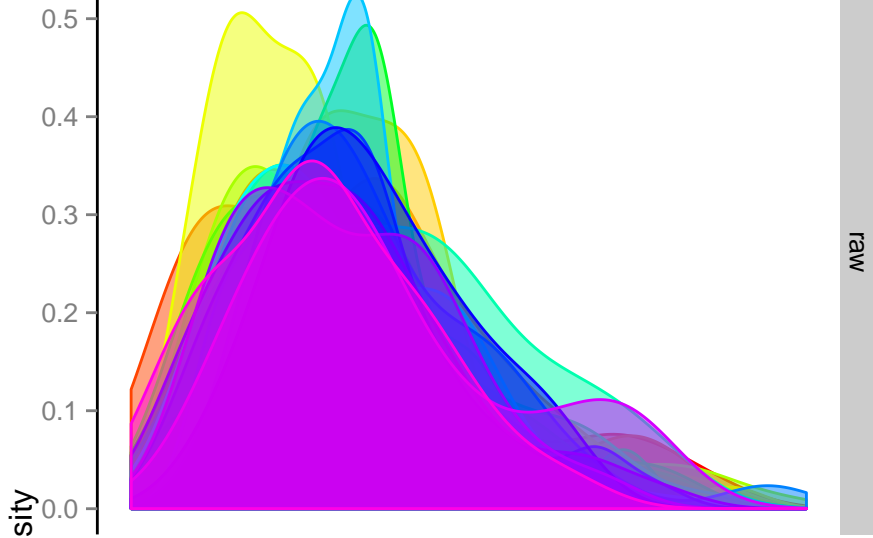

raw

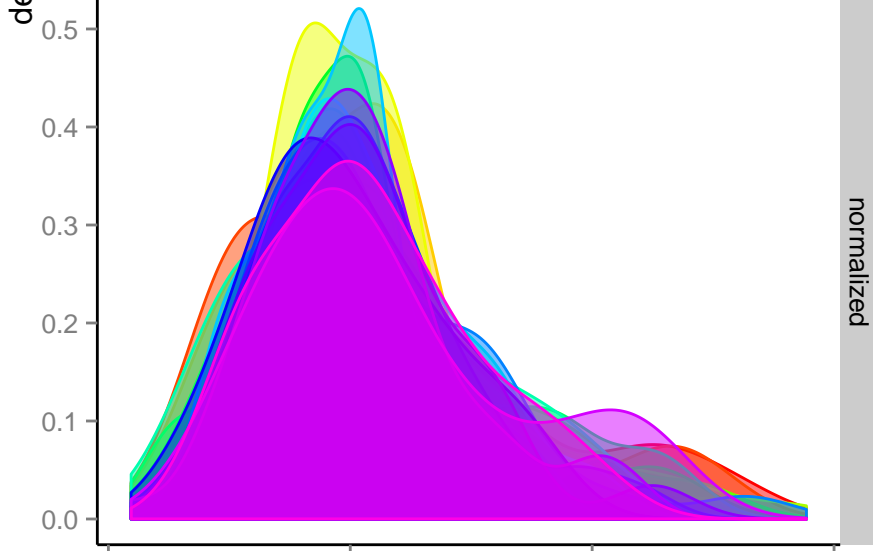

normalized

## PLATFORMRUNDAY\_miss

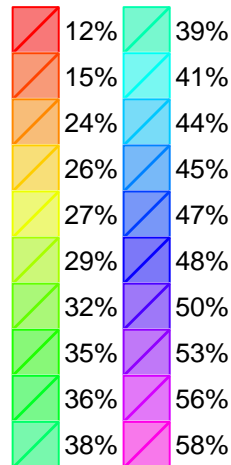

log(ion counts)

# tiglylcarnitine

runday

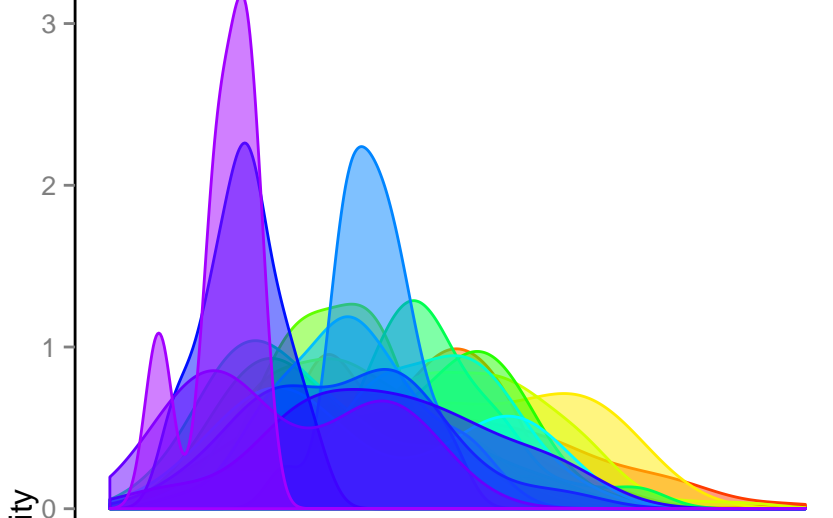

raw

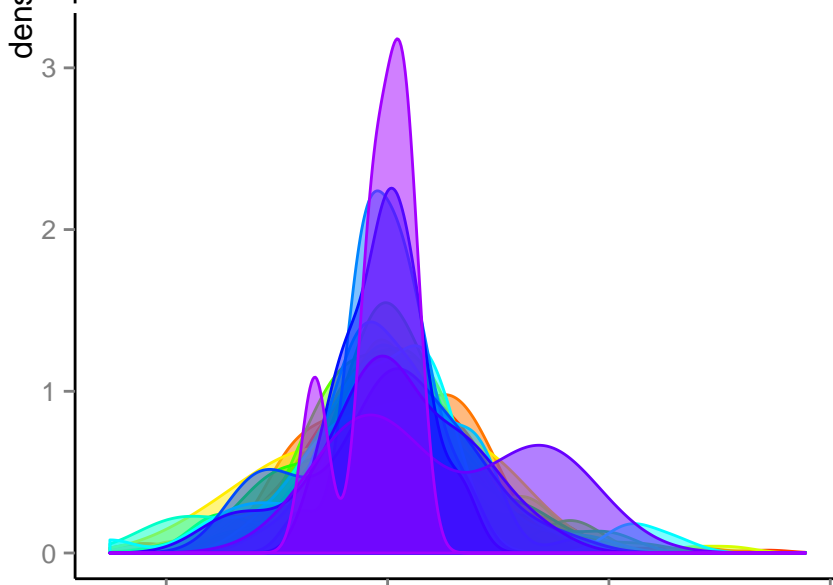

normalized

## PLATFORMRUNDAY\_miss

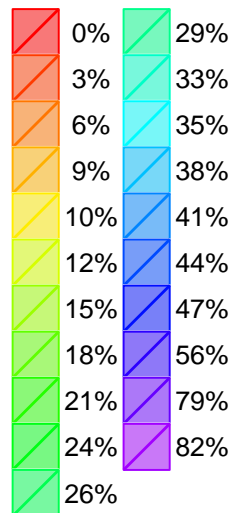

log(ion counts)

# trans-4-hydroxyproline

runday

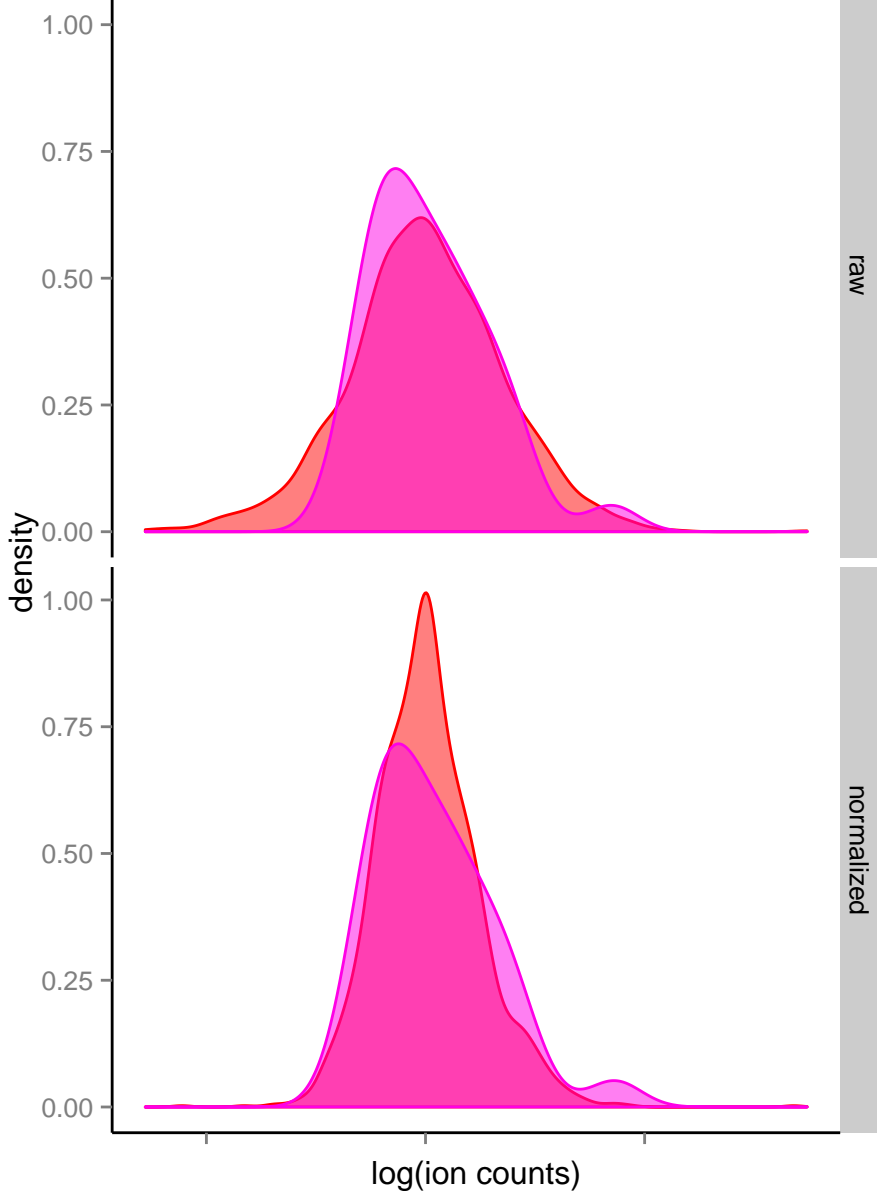

# trigonelline (N-methylnicotinate)

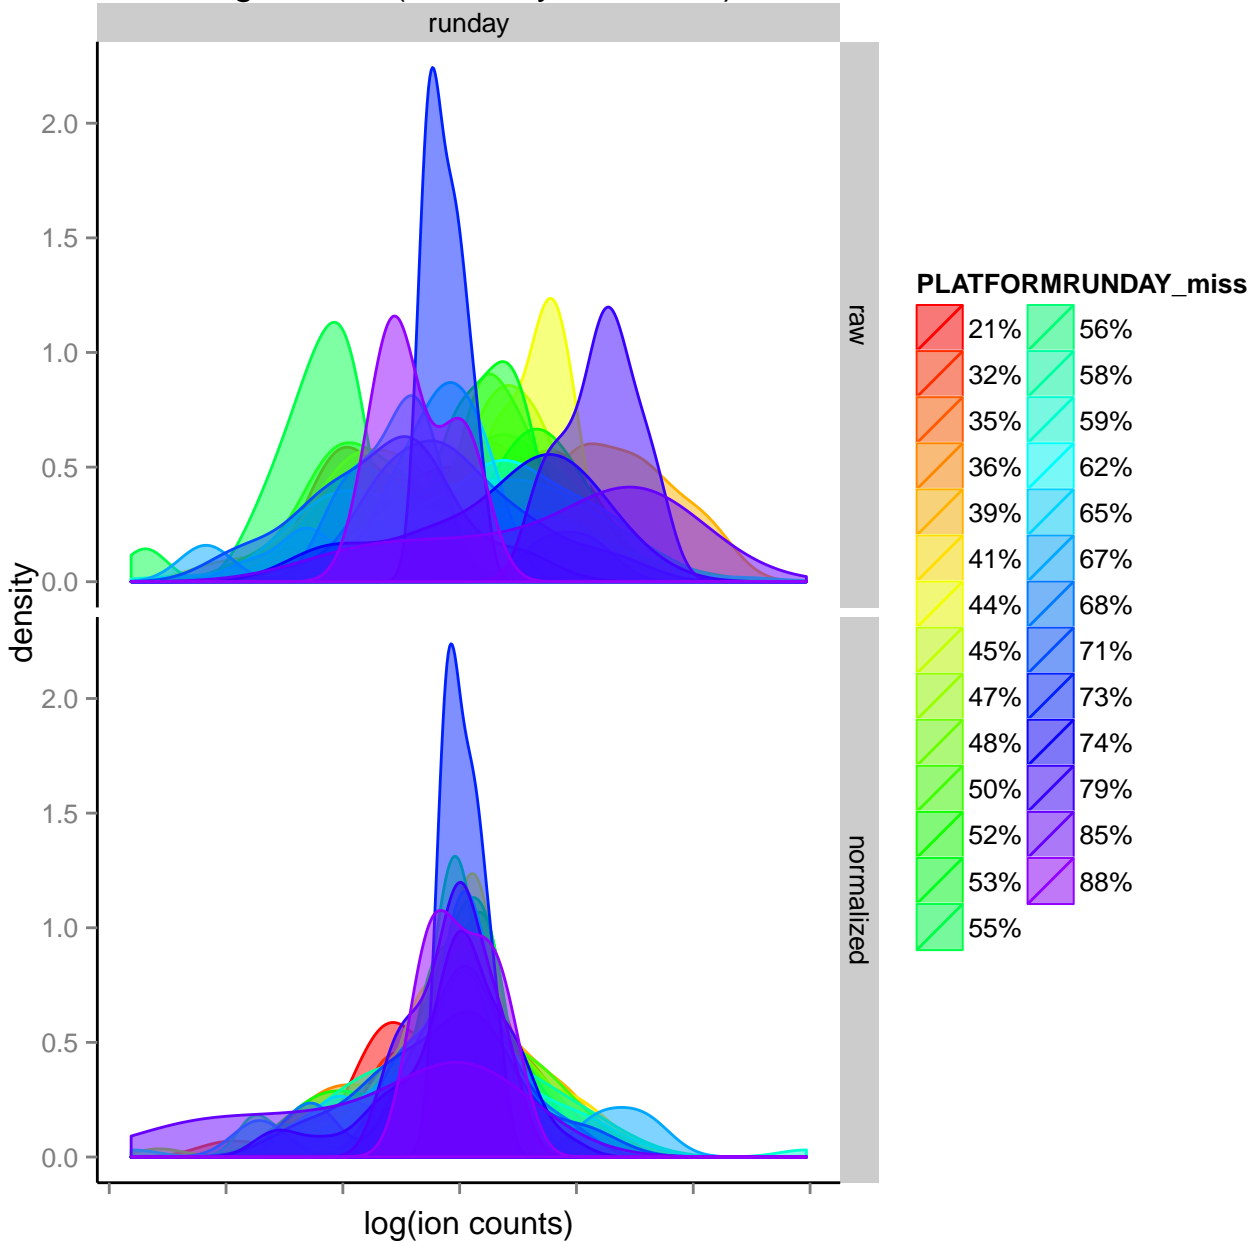

# tryptophan

runday

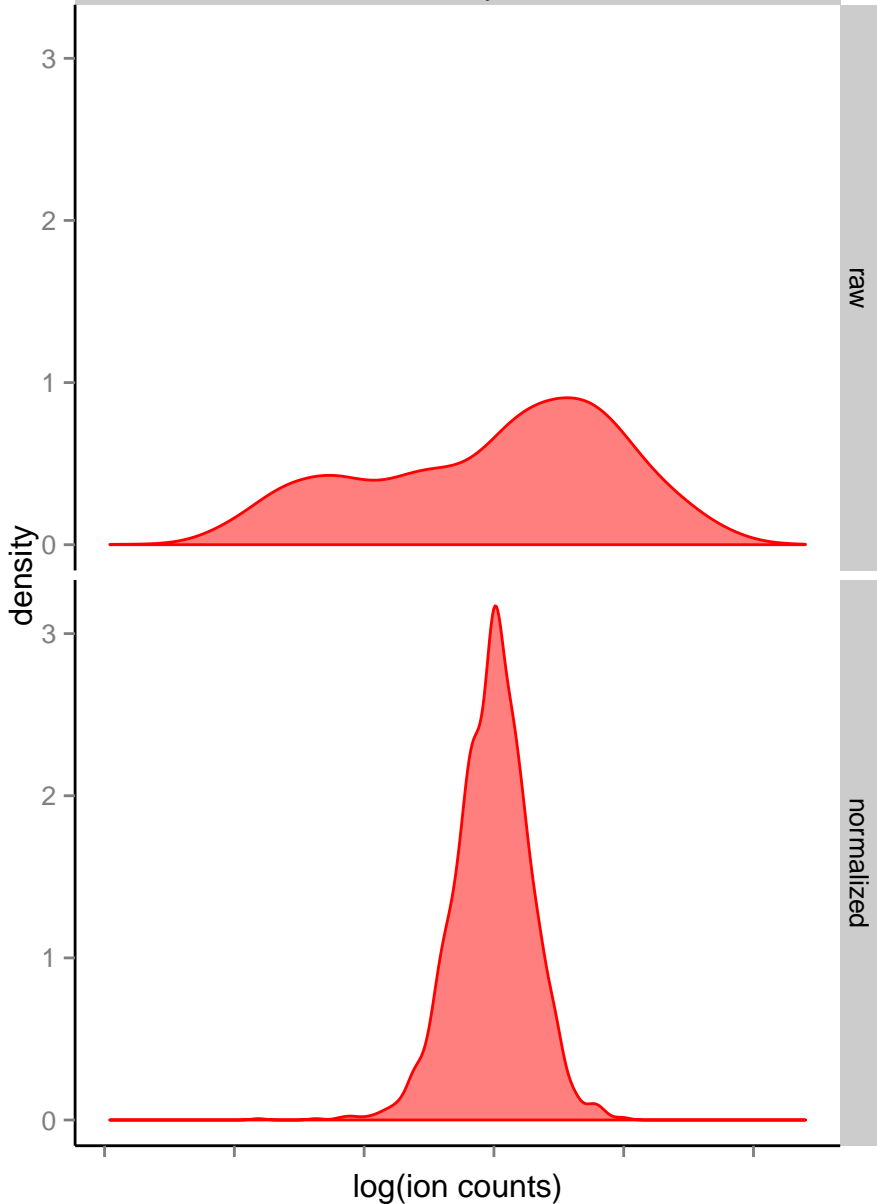

**PLATFORMRUNDAY\_miss**

0%



# tyrosine

runday

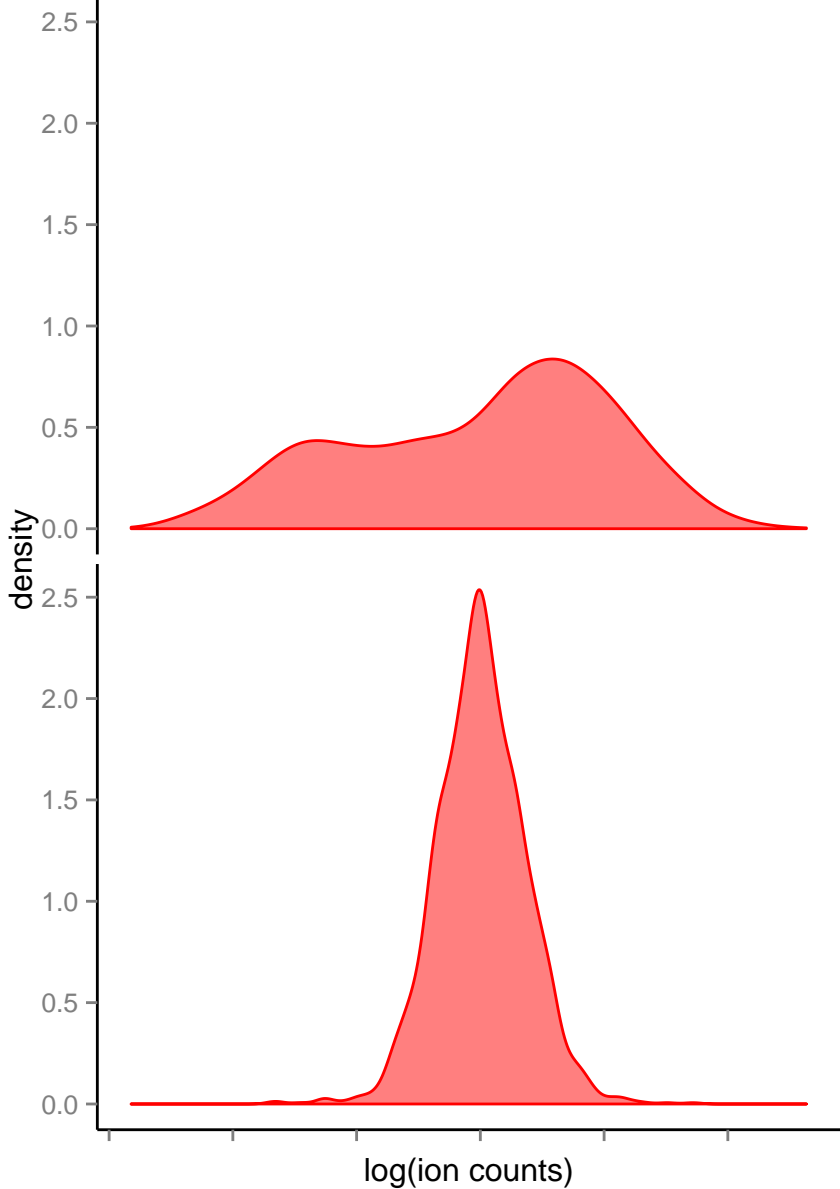

raw

normalized

**PLATFORMRUNDAY\_miss**



0%

# undecanoate (11:0)

runday

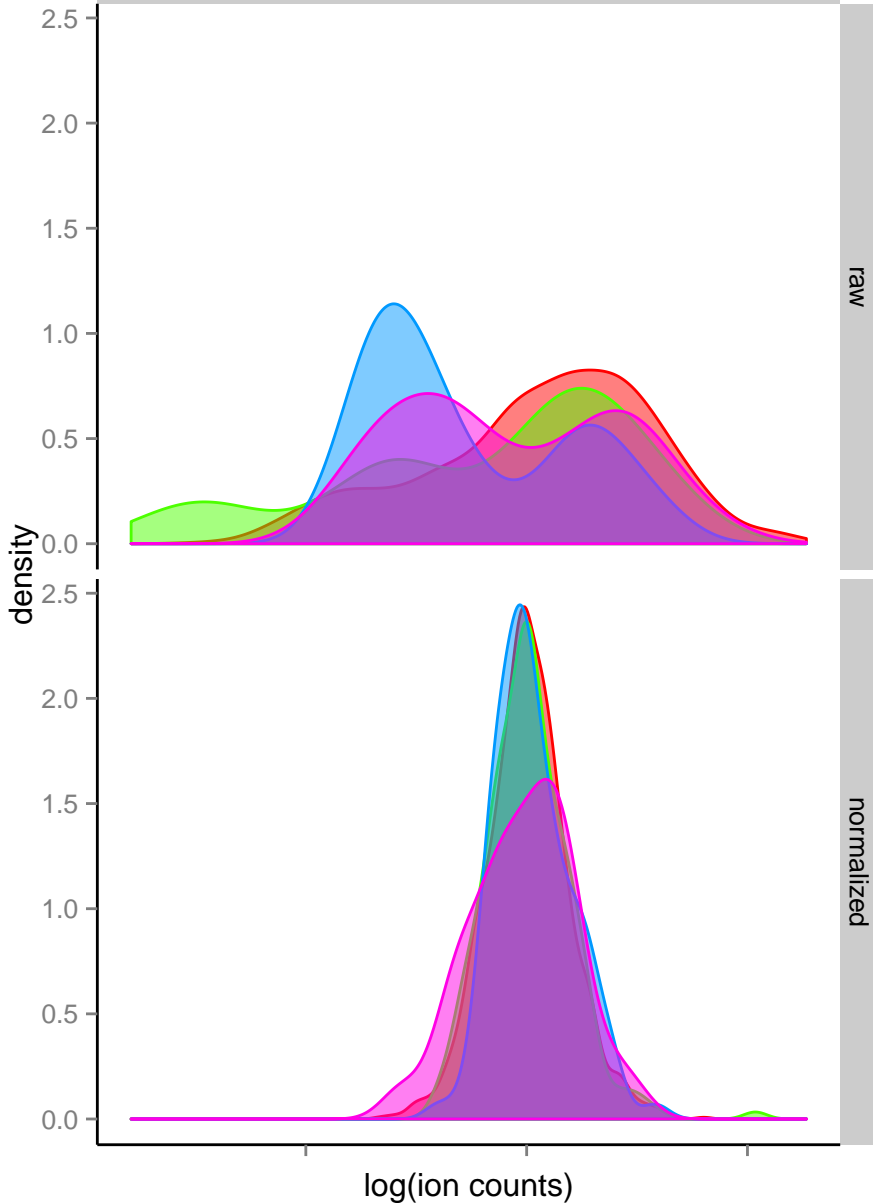

raw

normalized

**PLATFORMRUNDAY\_miss**



0%

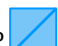

6%

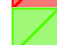

3%

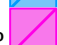

9%

log(ion counts)

urate

runday

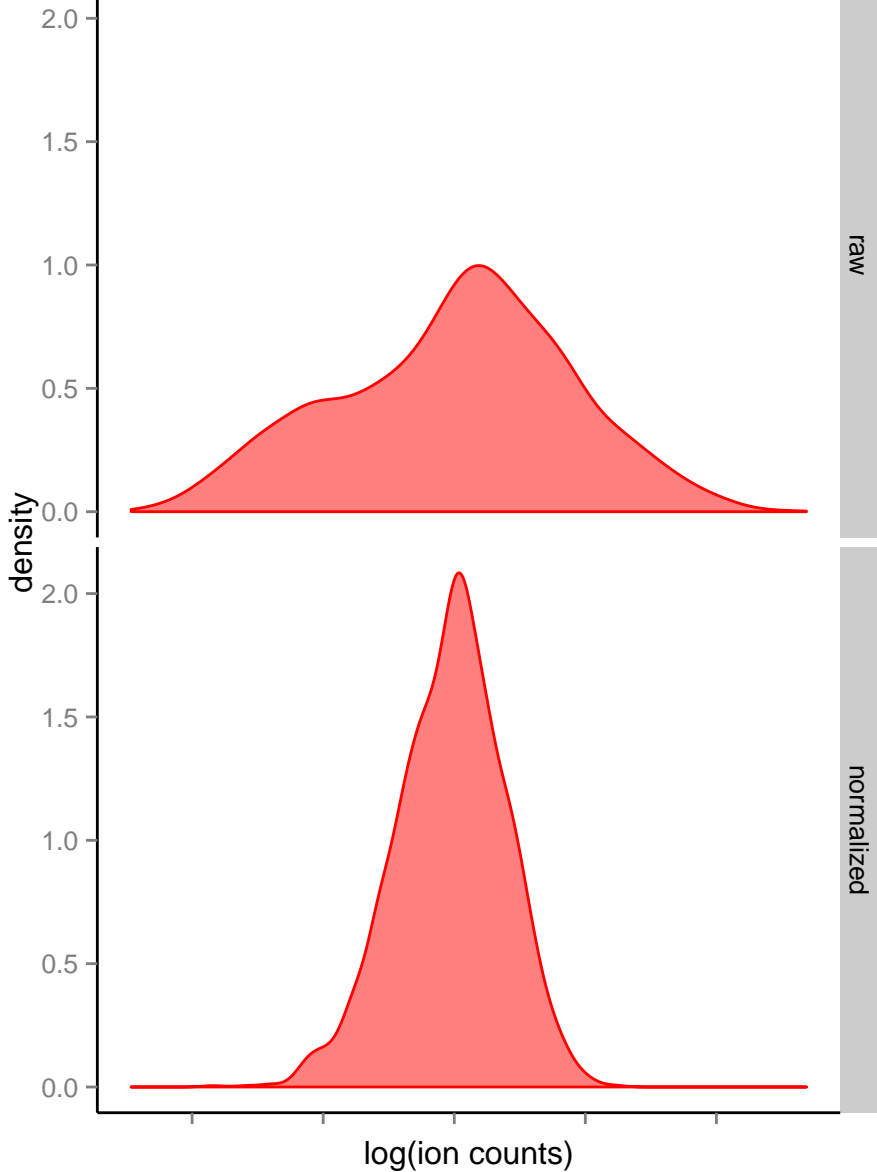

PLATFORMRUNDAY\_miss

0%

urea

runday

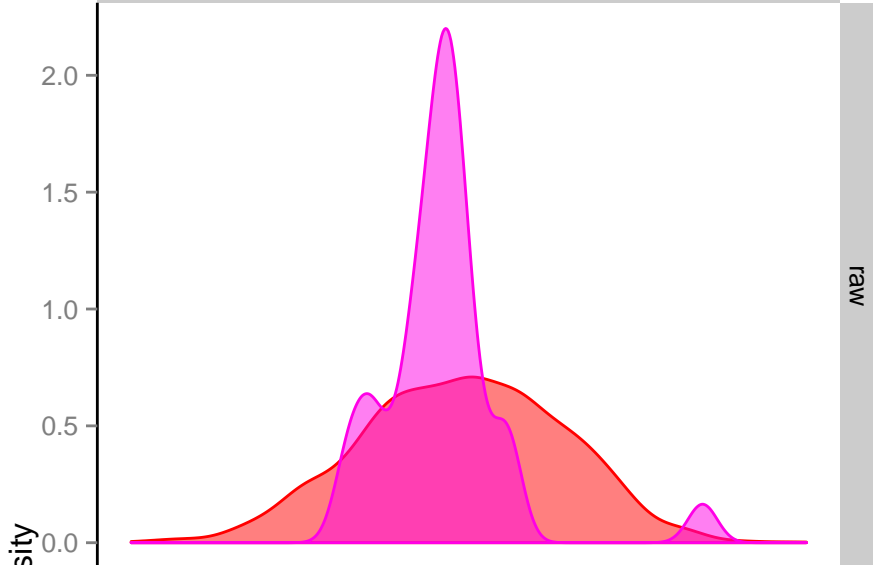

raw

PLATFORMRUNDAY\_miss



0%



3%

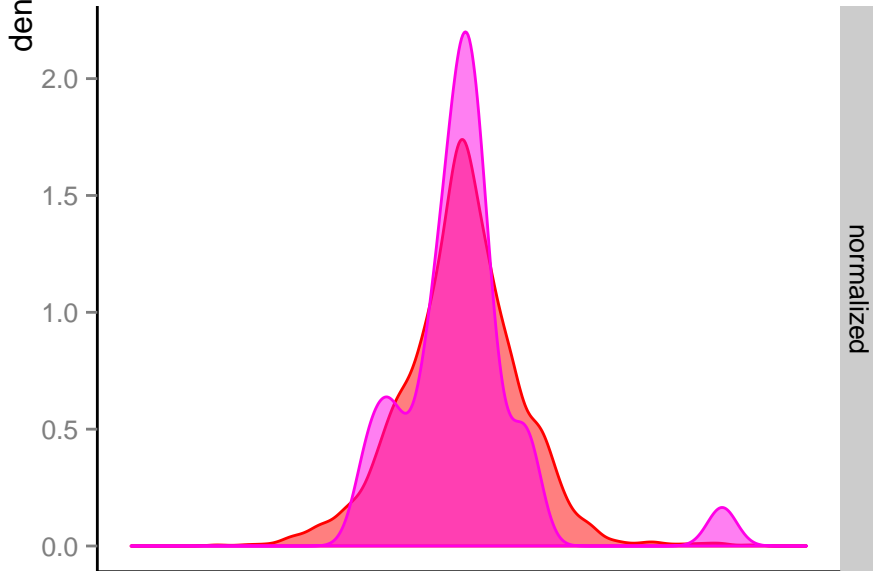

normalized

log(ion counts)

uridine

runday

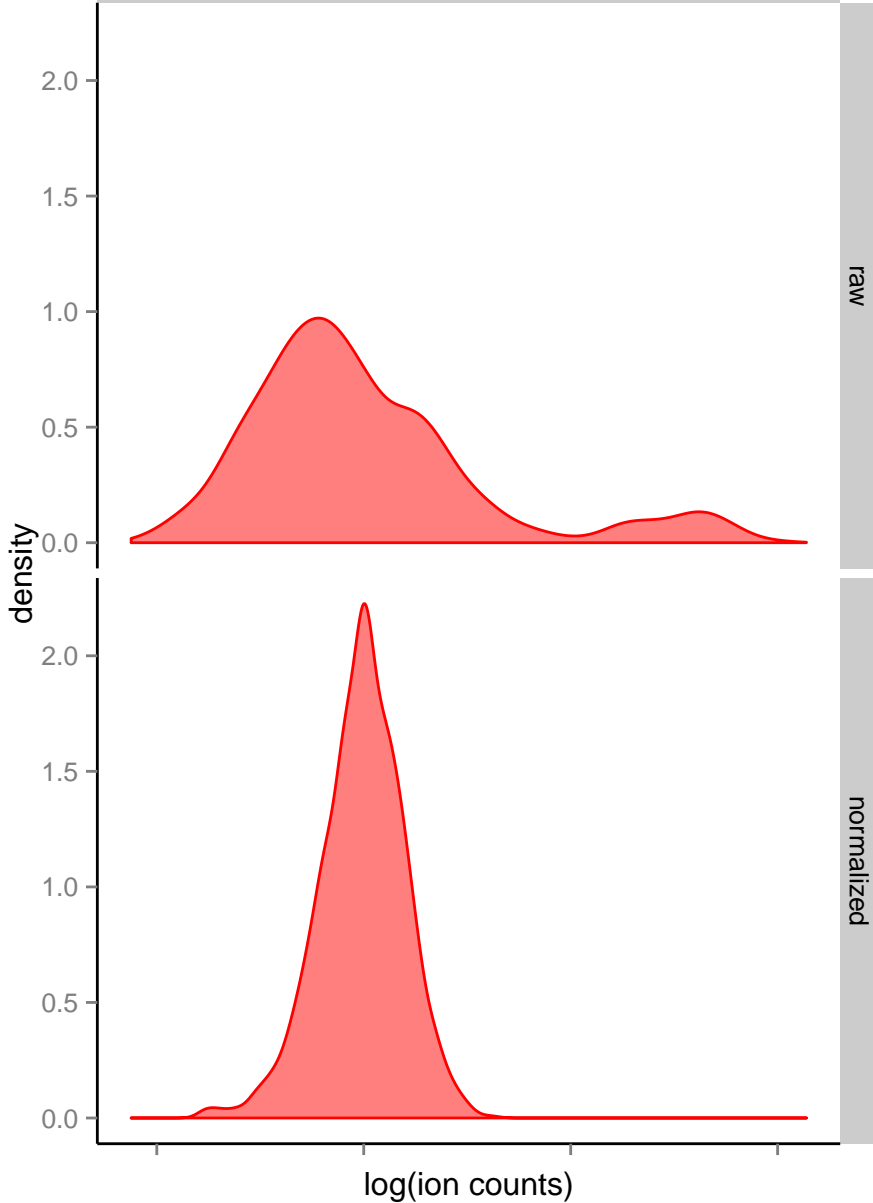

raw

normalized

PLATFORMRUNDAY\_miss

0%

# ursodeoxycholate

runday

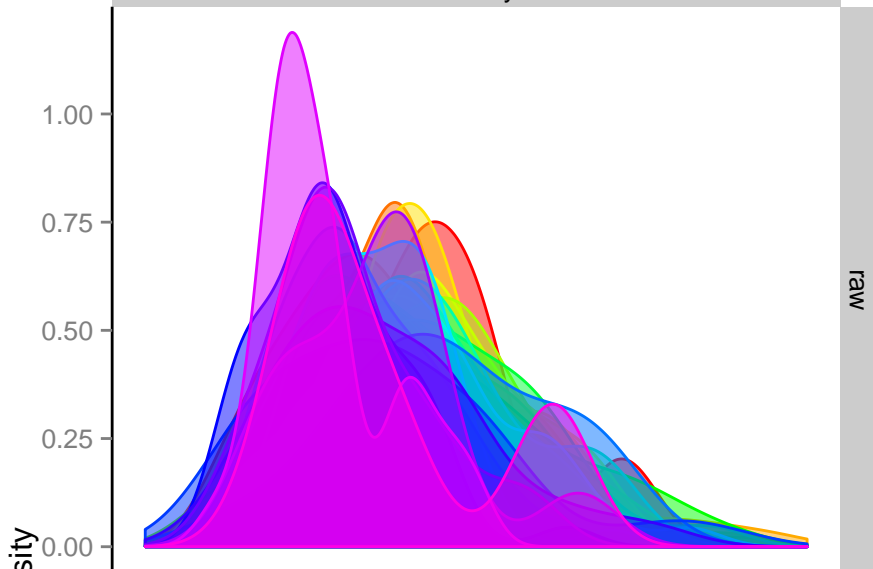

raw

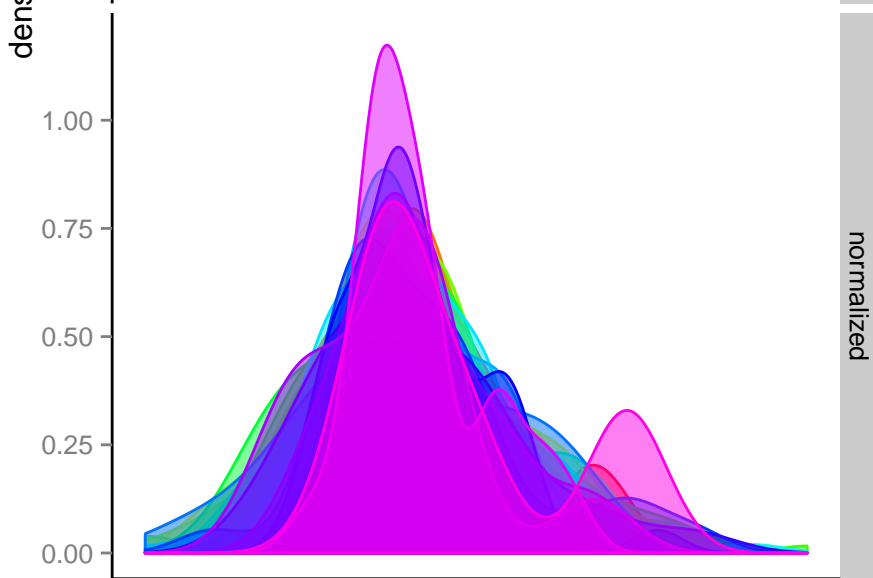

normalized

## PLATFORMRUNDAY\_miss

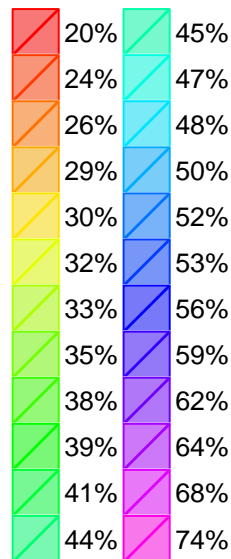

# valerate

runday

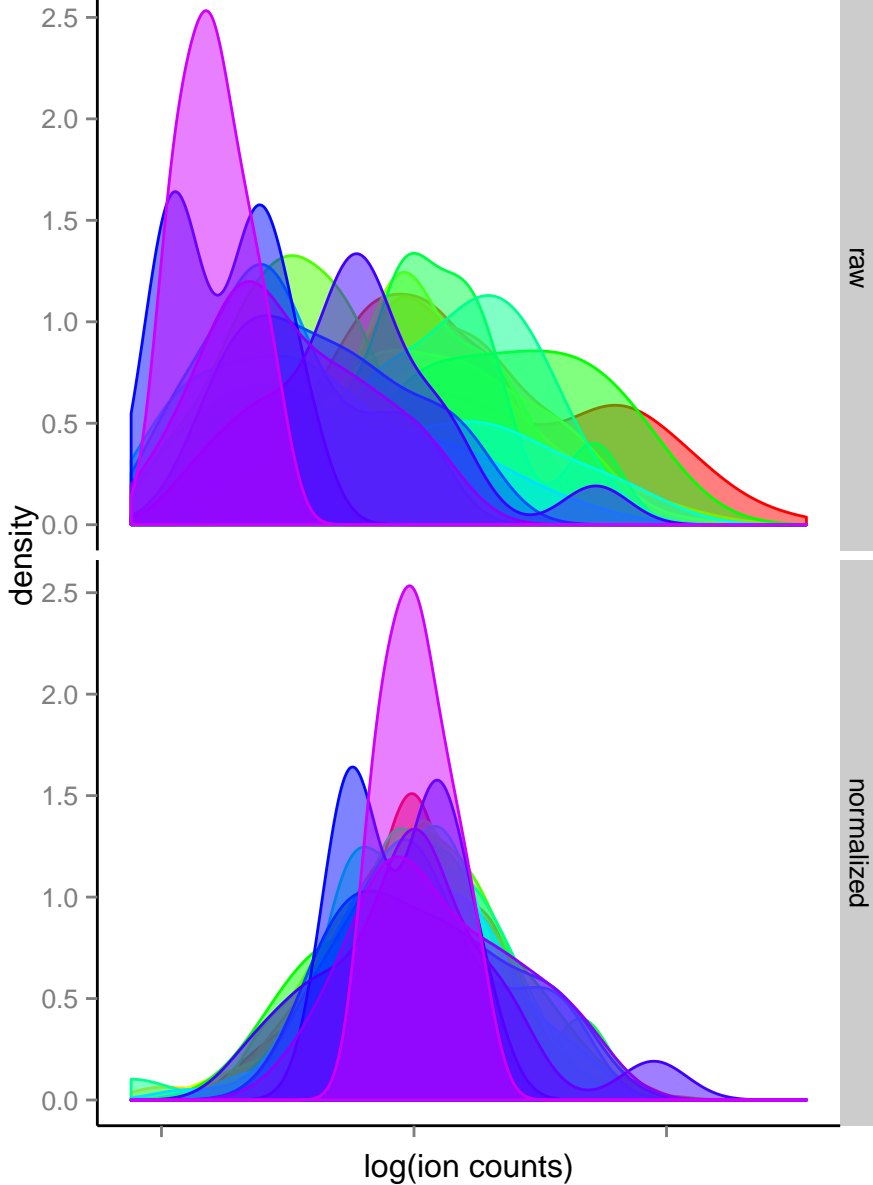

raw

normalized

## PLATFORMRUNDAY\_miss

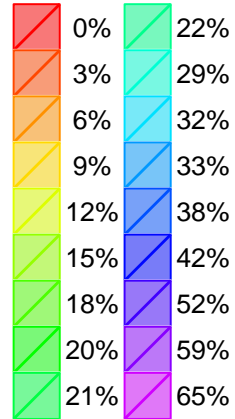

valine

runday

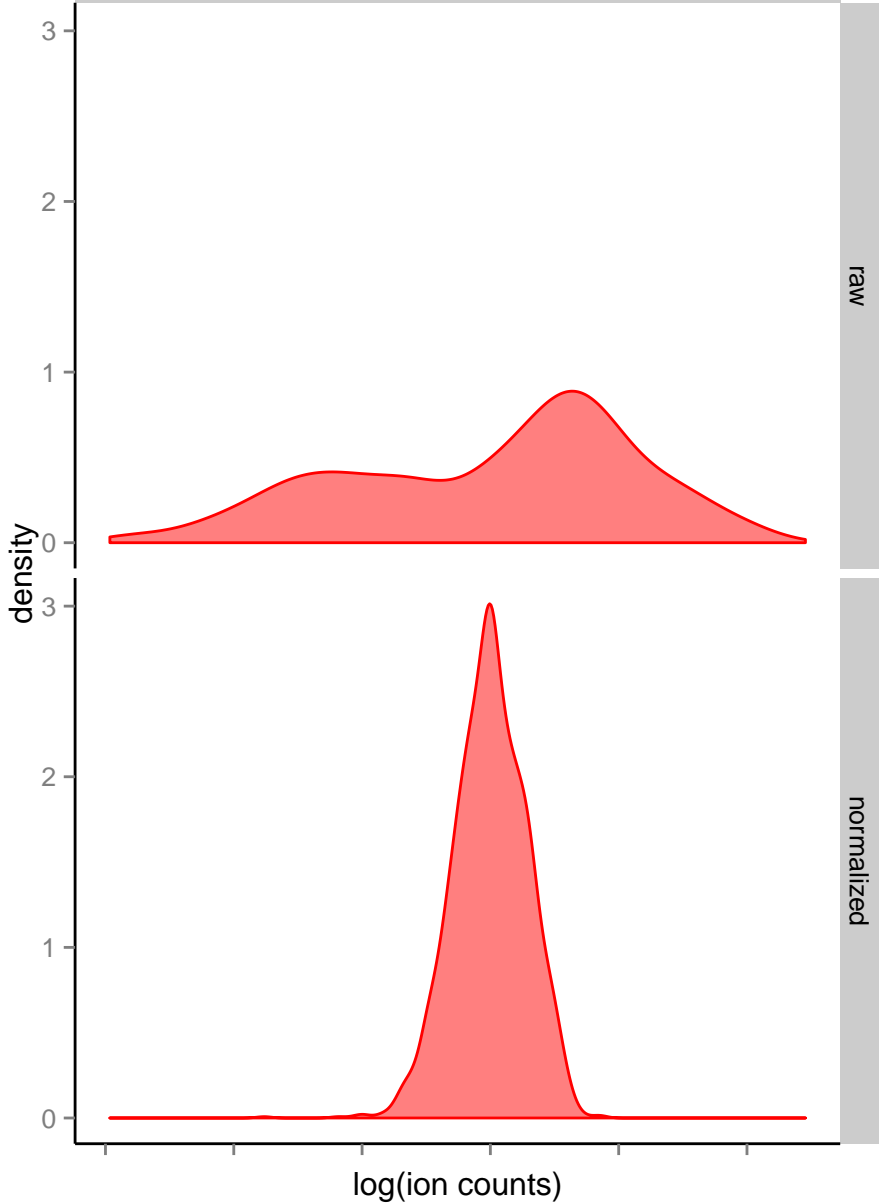

PLATFORMRUNDAY\_miss

0%



# xanthine

runday

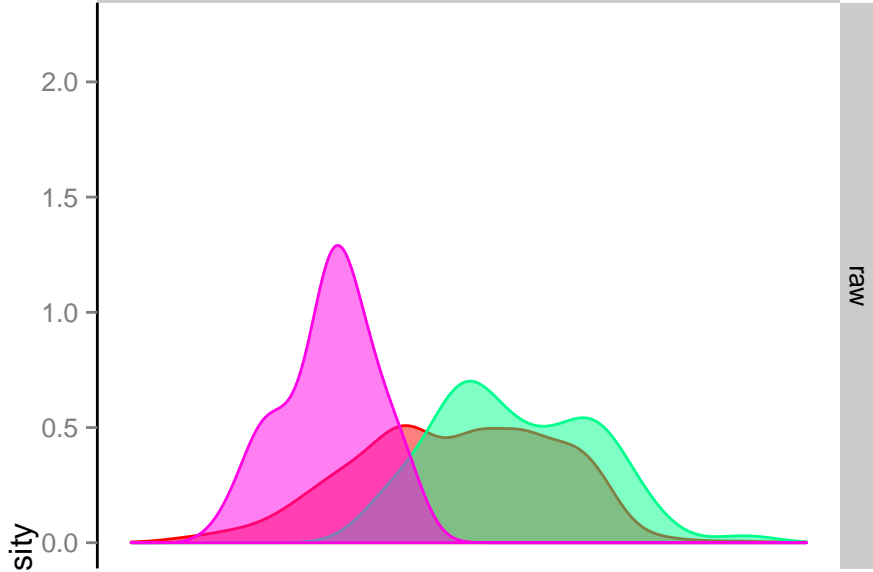

raw

**PLATFORMRUNDAY\_miss**

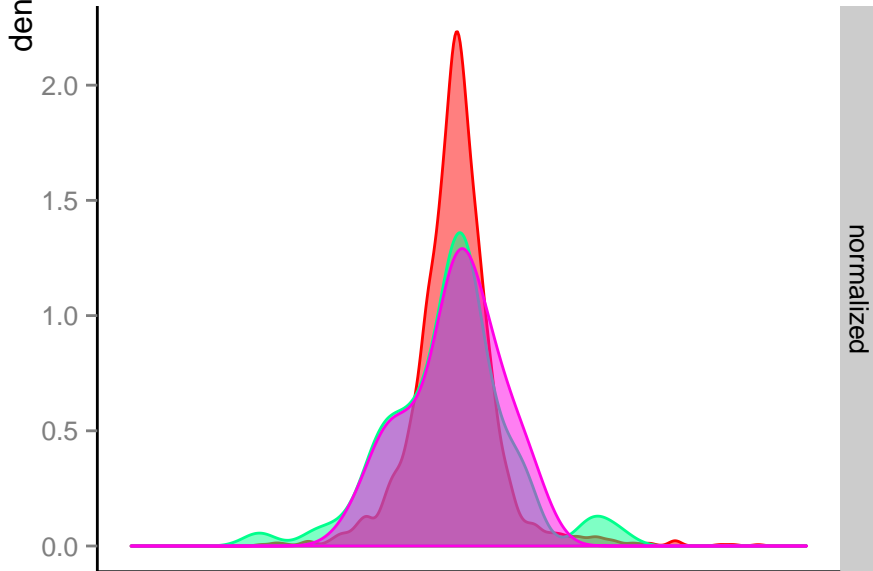

normalized

log(ion counts)

# X-01911

runday

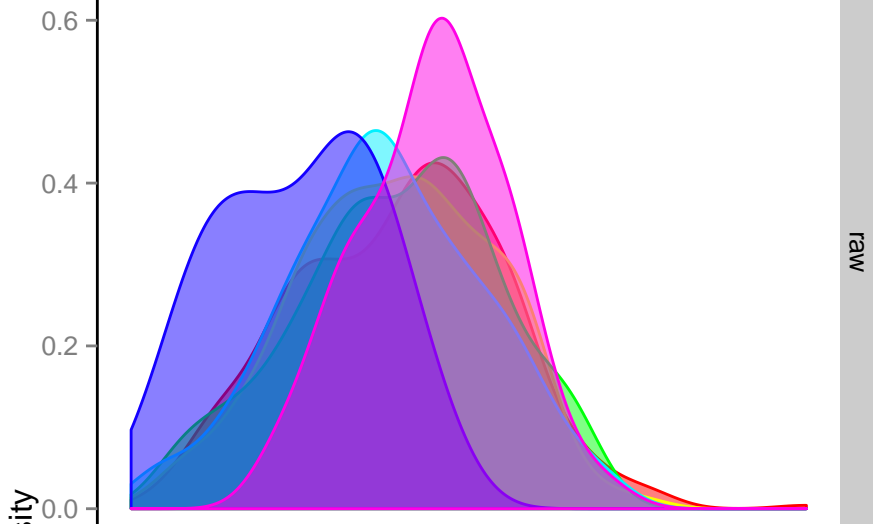

raw

## PLATFORMRUNDAY\_miss

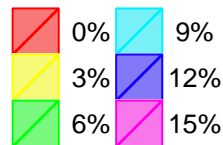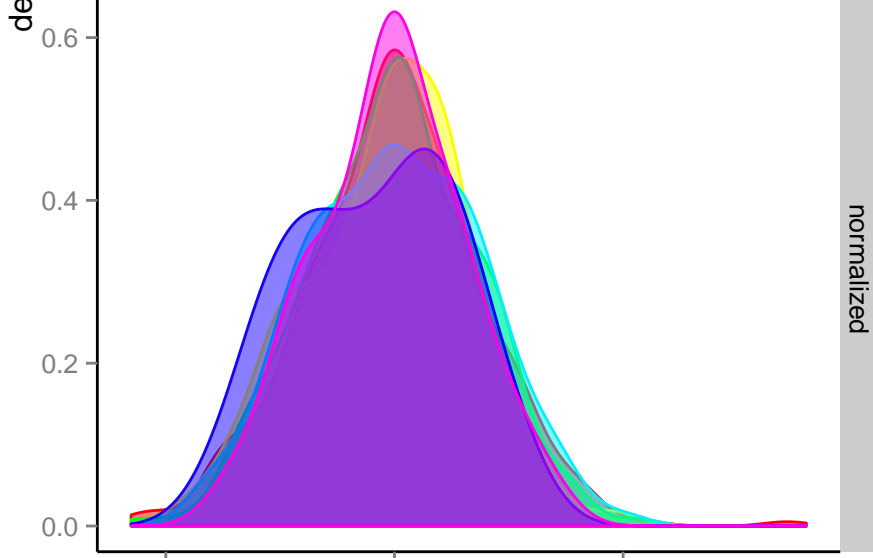

normalized

log(ion counts)

X-02249

runday

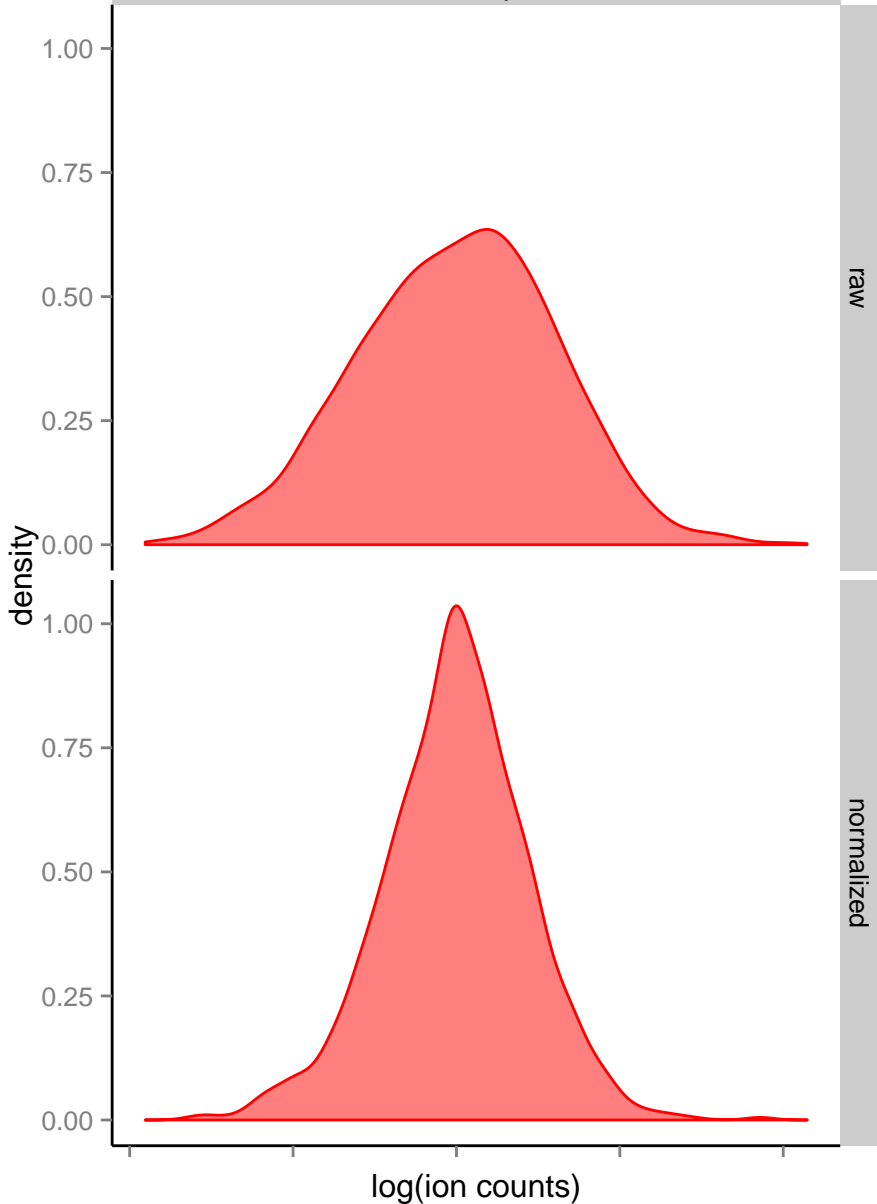

raw

normalized

**PLATFORMRUNDAY\_miss**

0%

# X-02269

runday

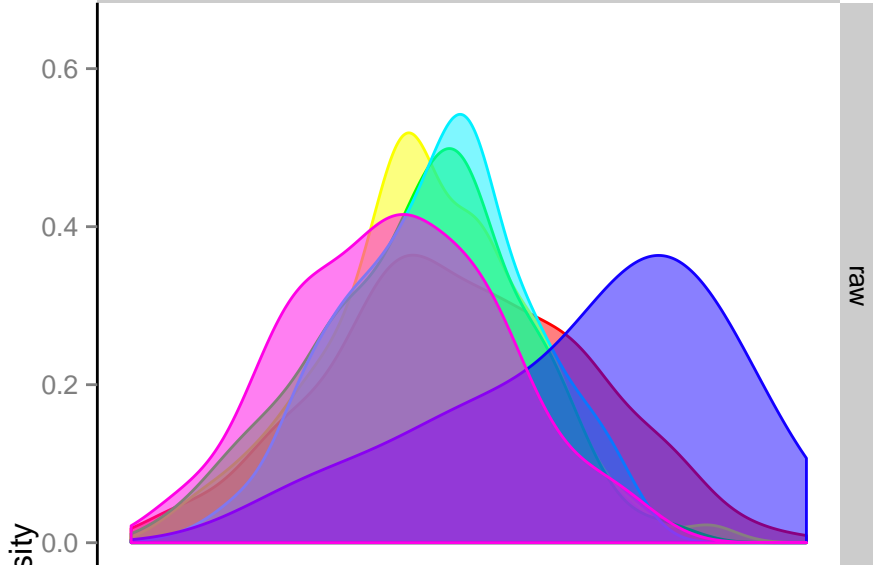

raw

## PLATFORMRUNDAY\_miss

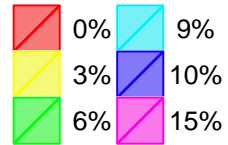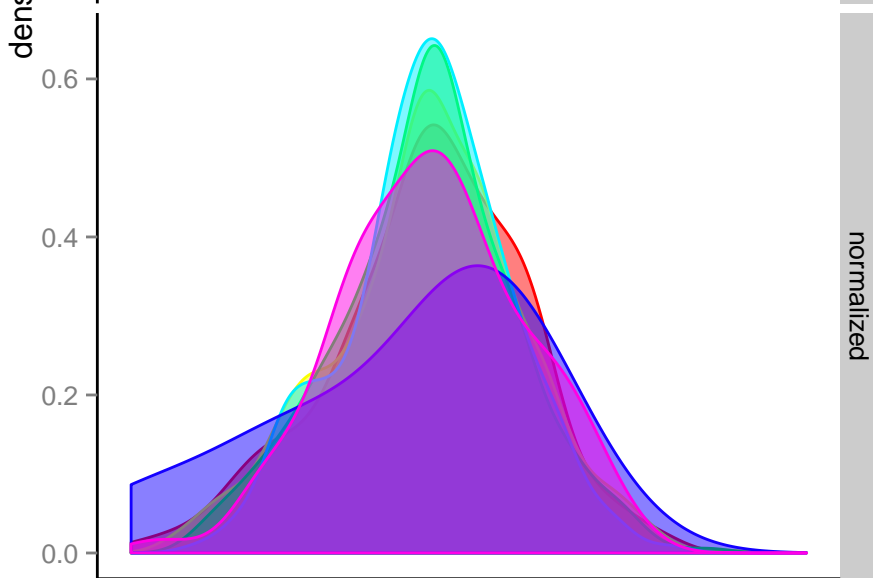

normalized

log(ion counts)

X-02973

runday

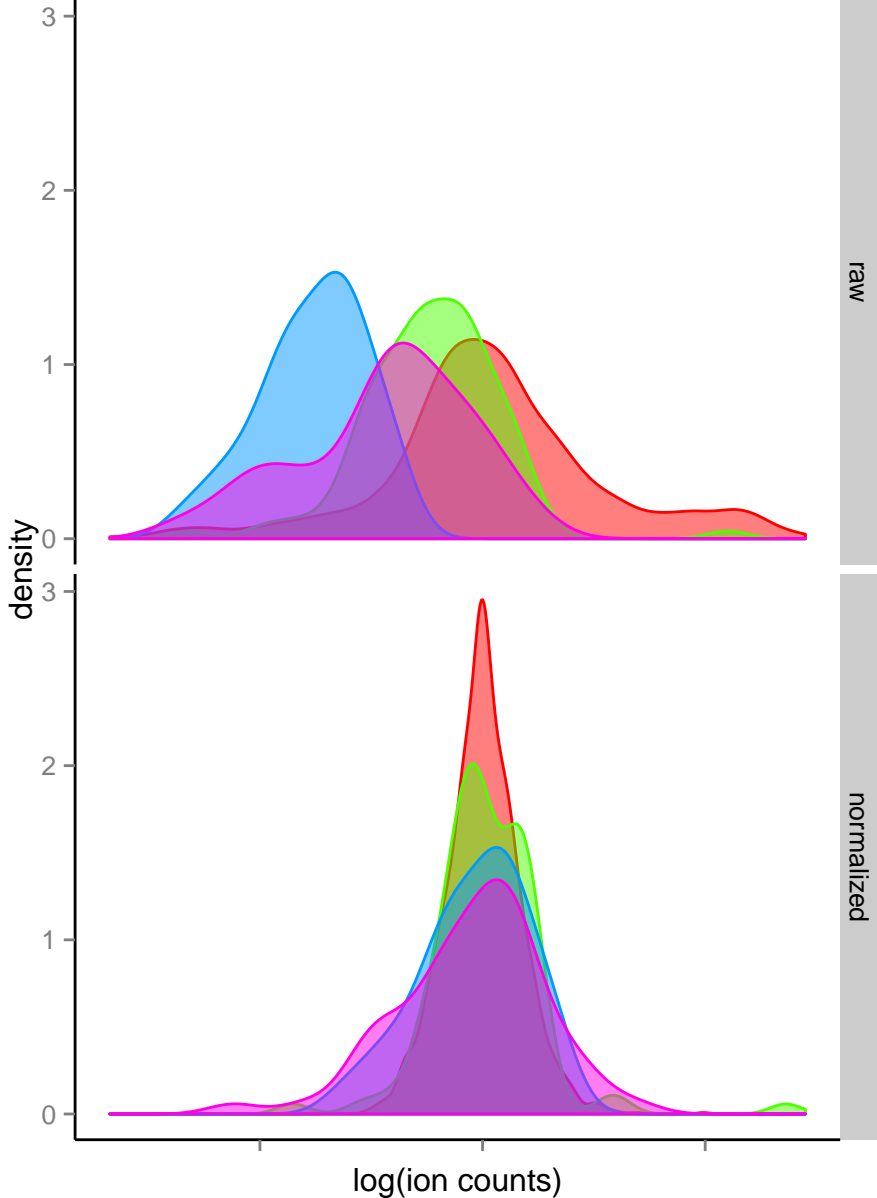

raw

normalized

**PLATFORMRUNDAY\_miss**

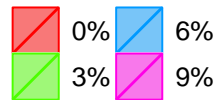

X-03003

runday

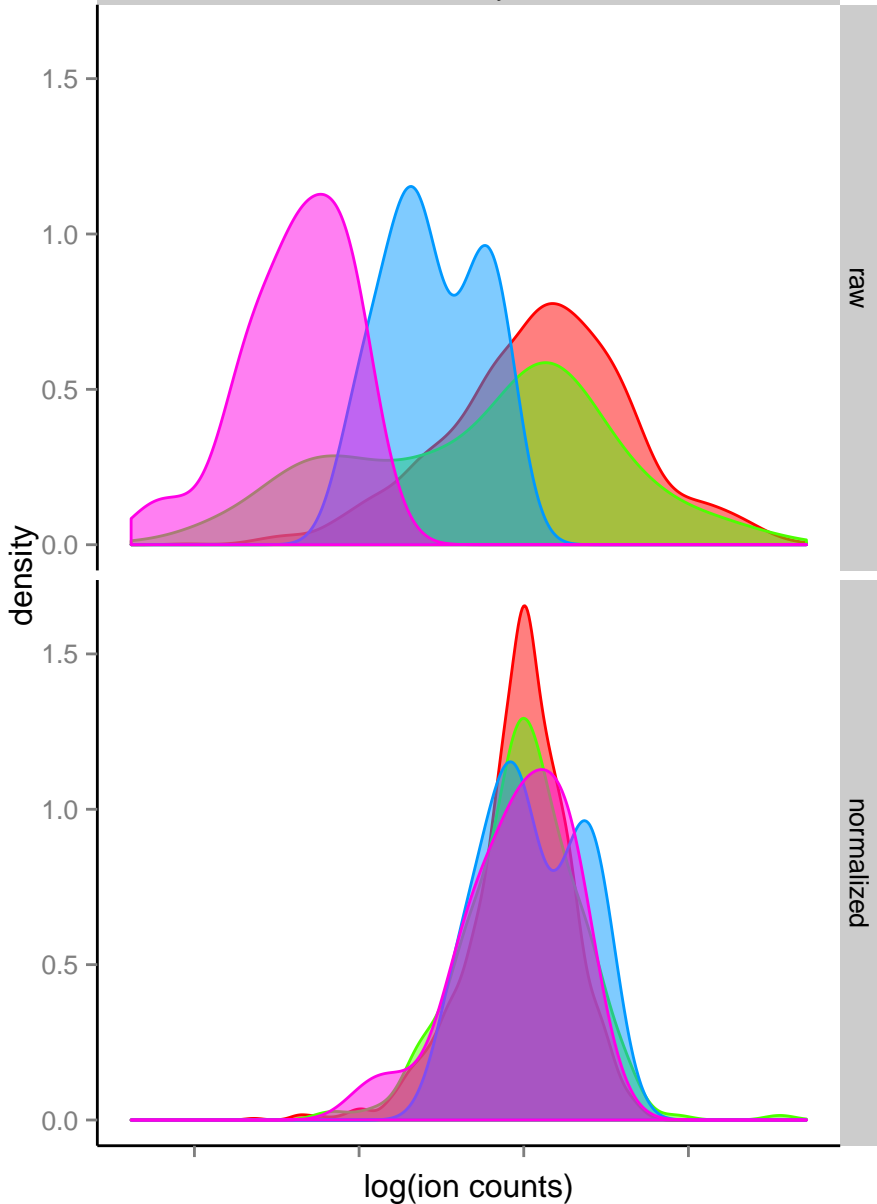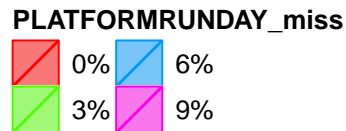

# N-[3-(2-Oxopyrrolidin-1-yl)propyl]acetamide

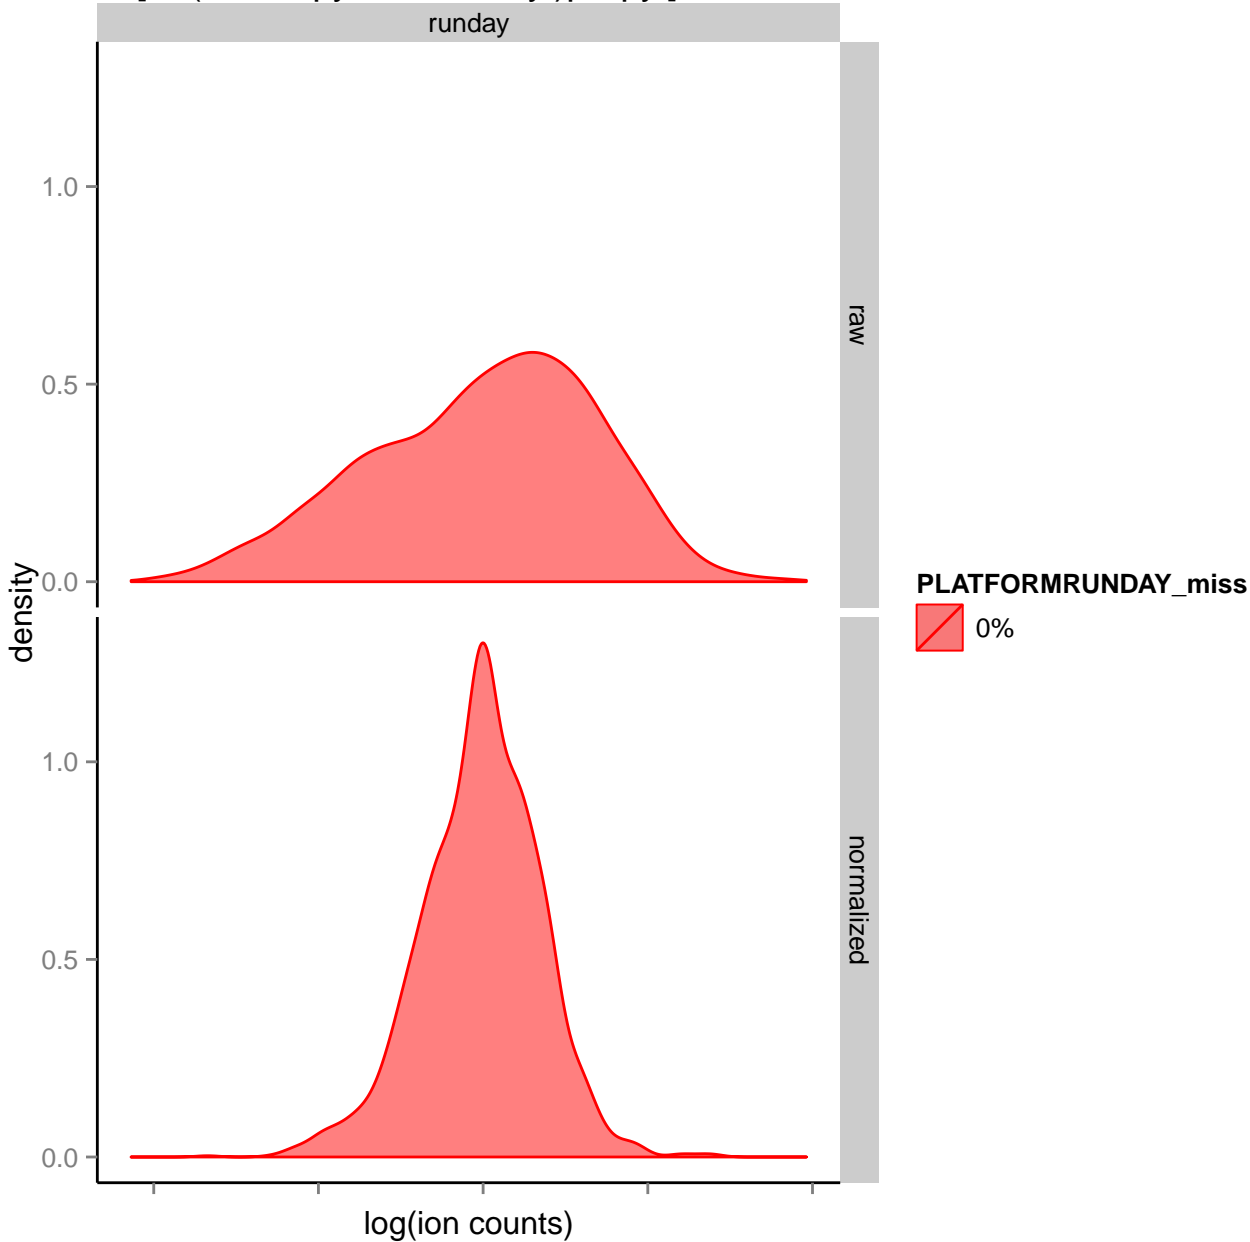

X-03088

runday

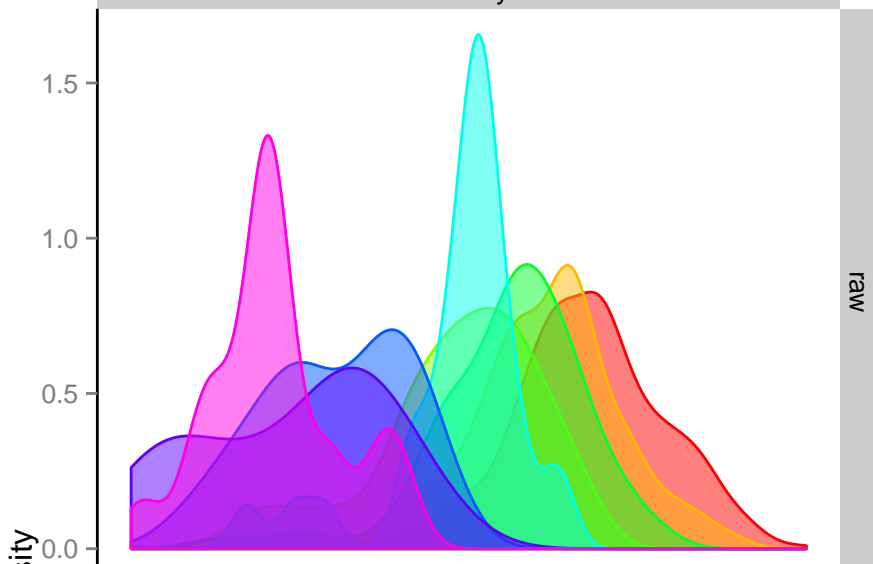

raw

PLATFORMRUNDAY\_miss

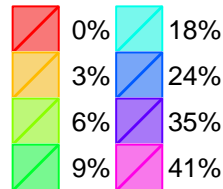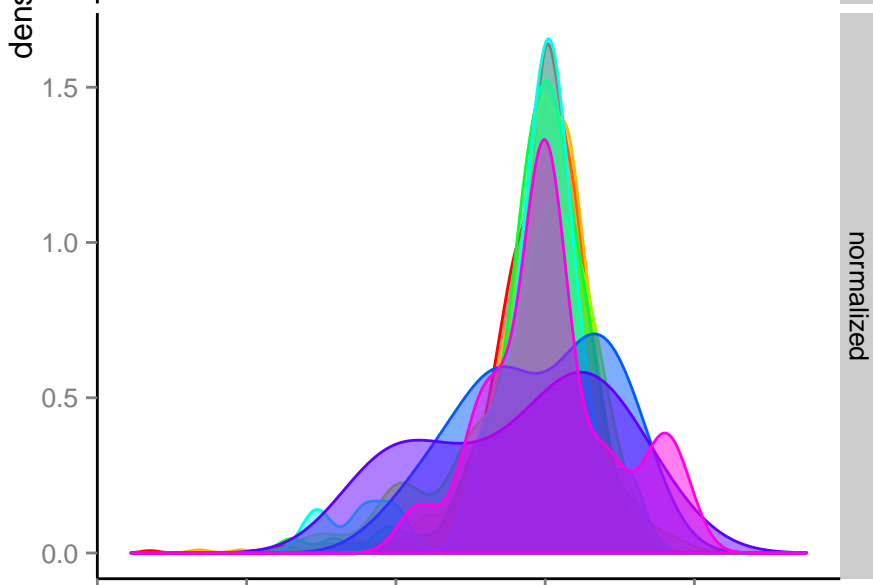

normalized

log(ion counts)



X-03090

runday

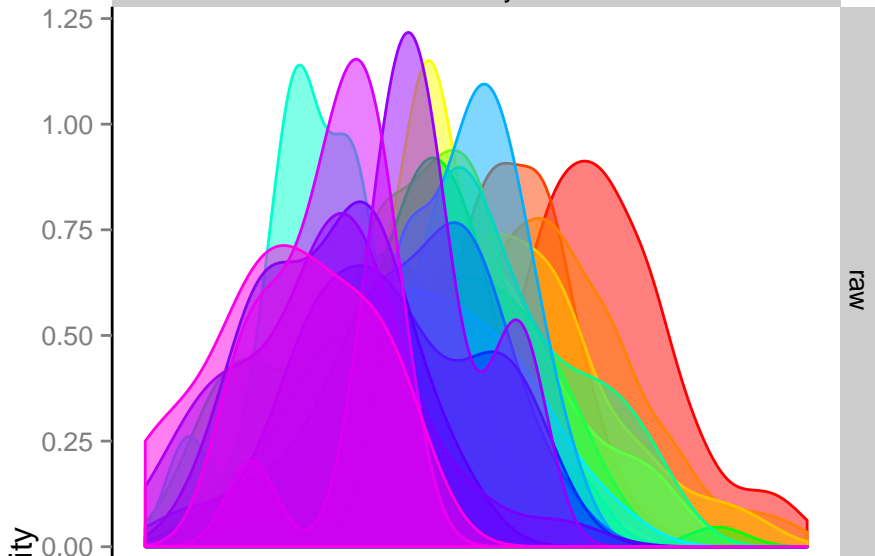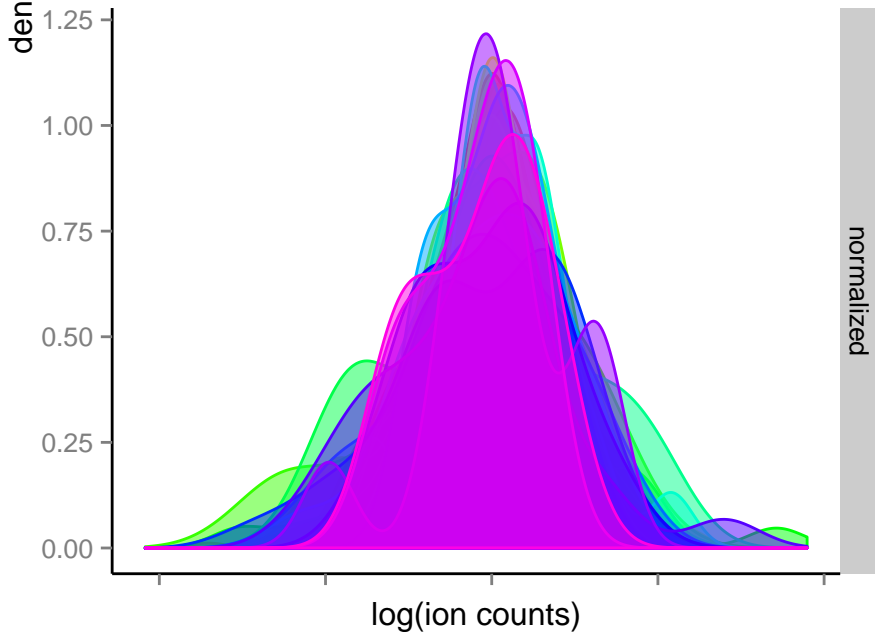

**PLATFORMRUNDAY\_miss**

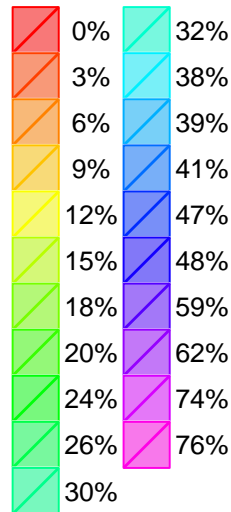

X-03094

runday

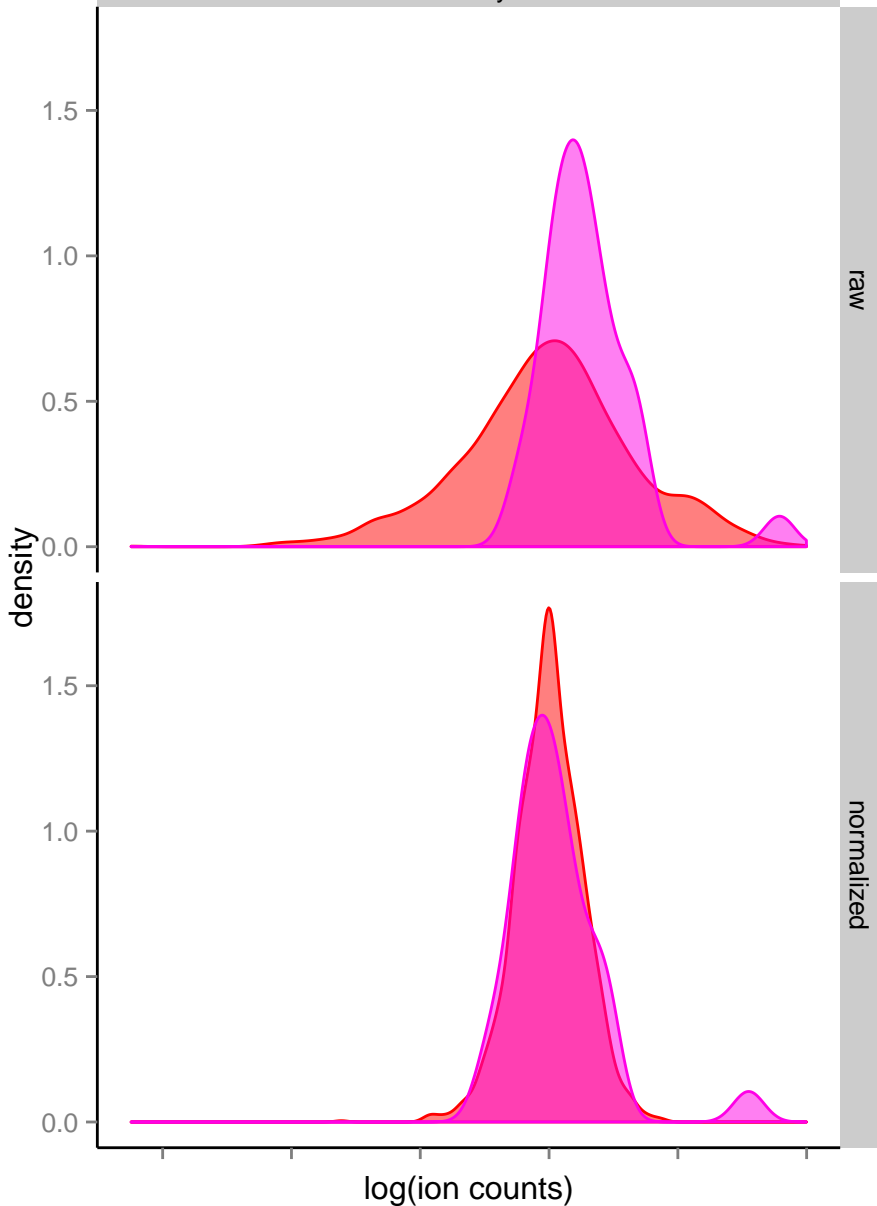

raw

normalized

**PLATFORMRUNDAY\_miss**



0%



3%

X-04357

runday

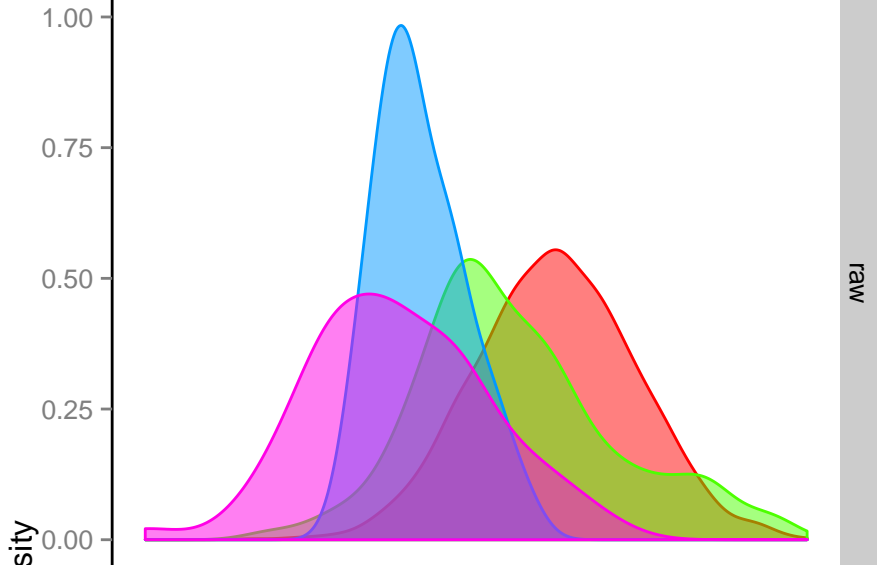

raw

**PLATFORMRUNDAY\_miss**

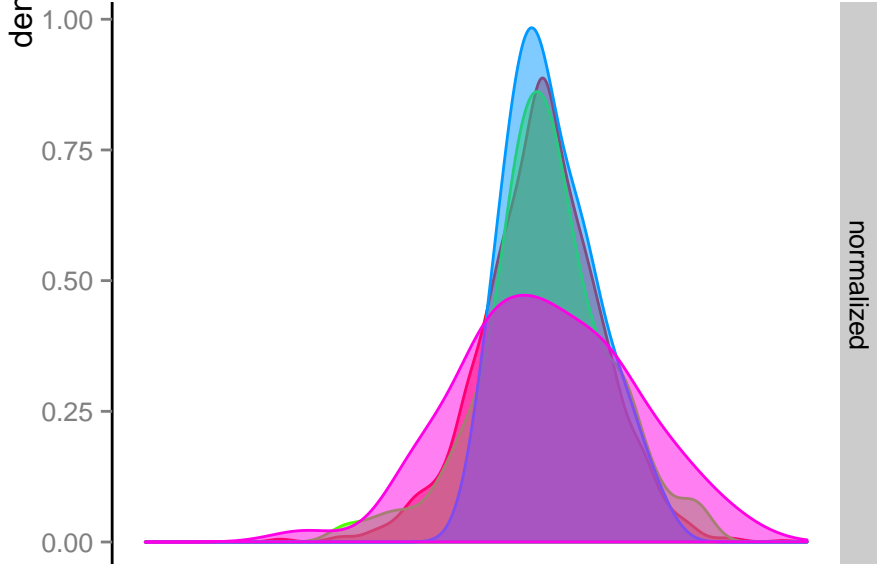

normalized

log(ion counts)

X-04494

runday

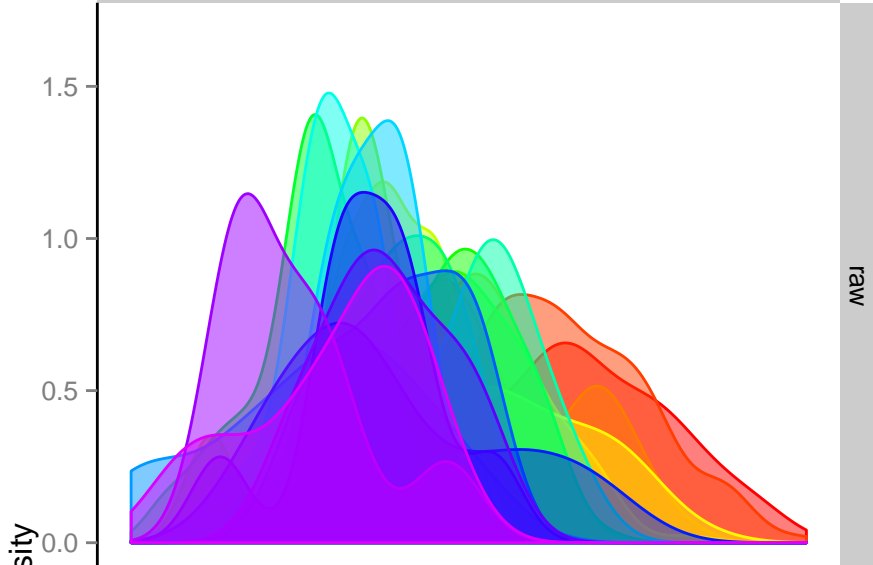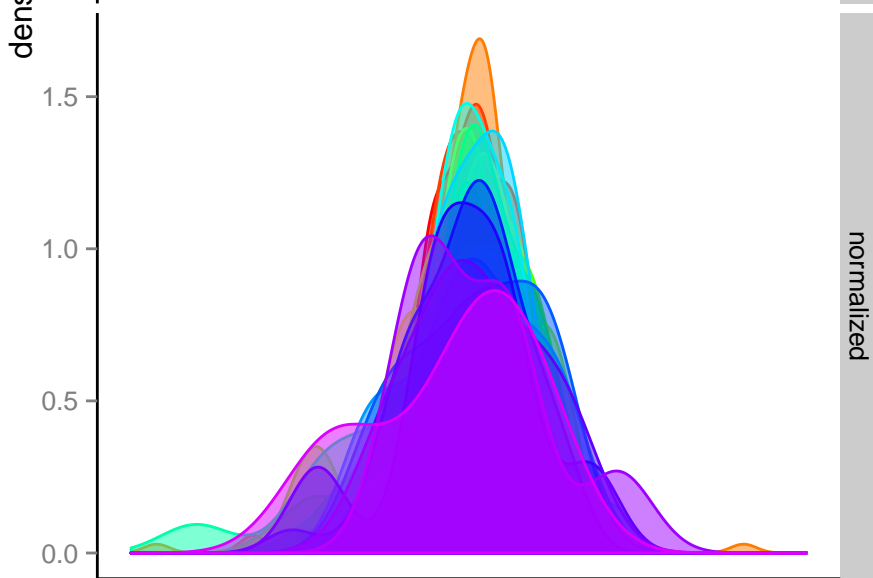

**PLATFORMRUNDAY\_miss**

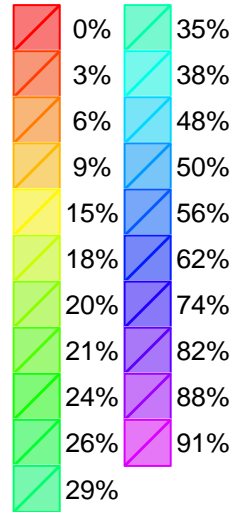

log(ion counts)

# X-04495

runday

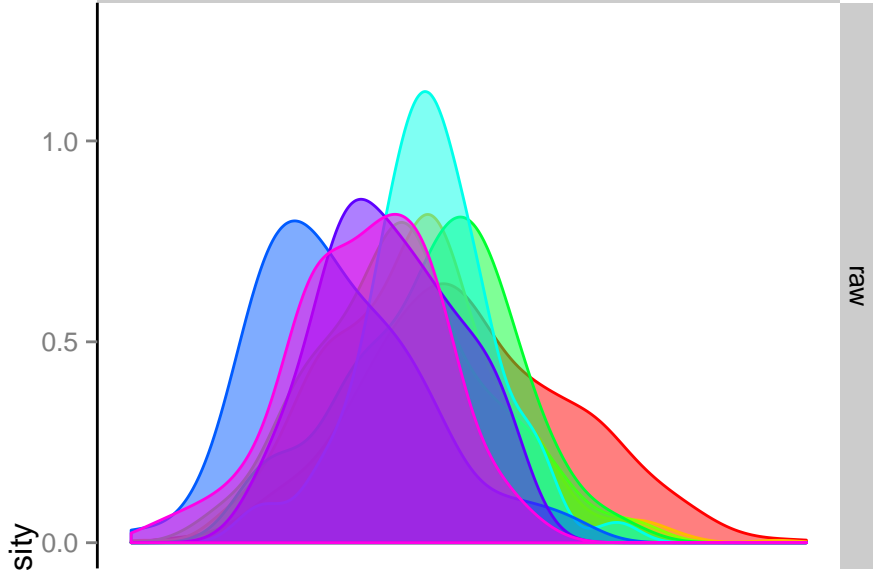

raw

## PLATFORMRUNDAY\_miss

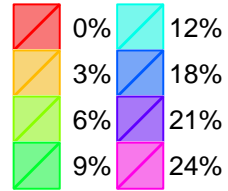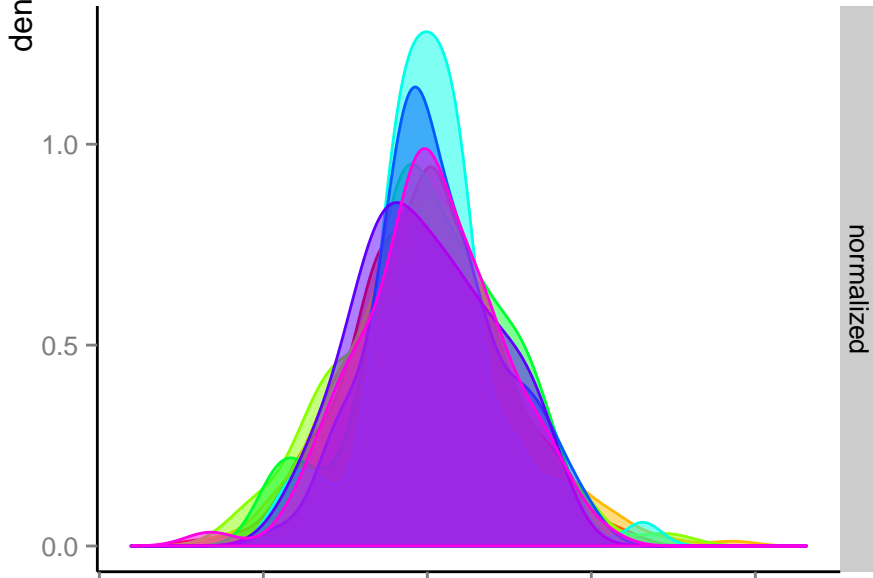

normalized

log(ion counts)

# X-04498

runday

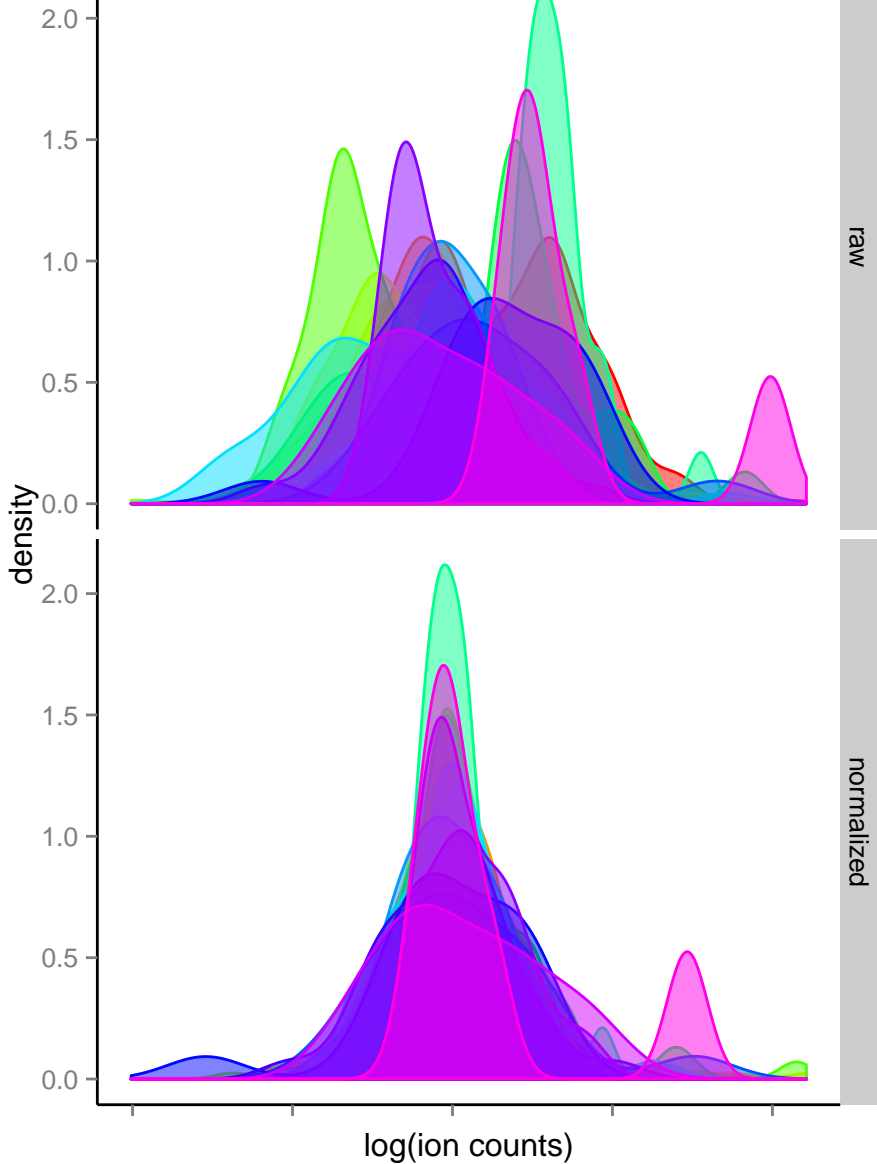

## PLATFORMRUNDAY\_miss

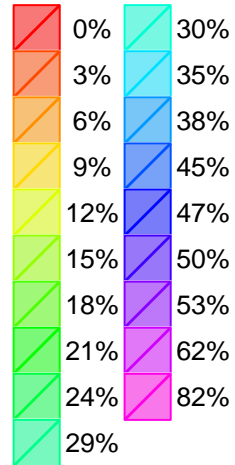

# 3,4-dihydroxybutyrate\*

runday

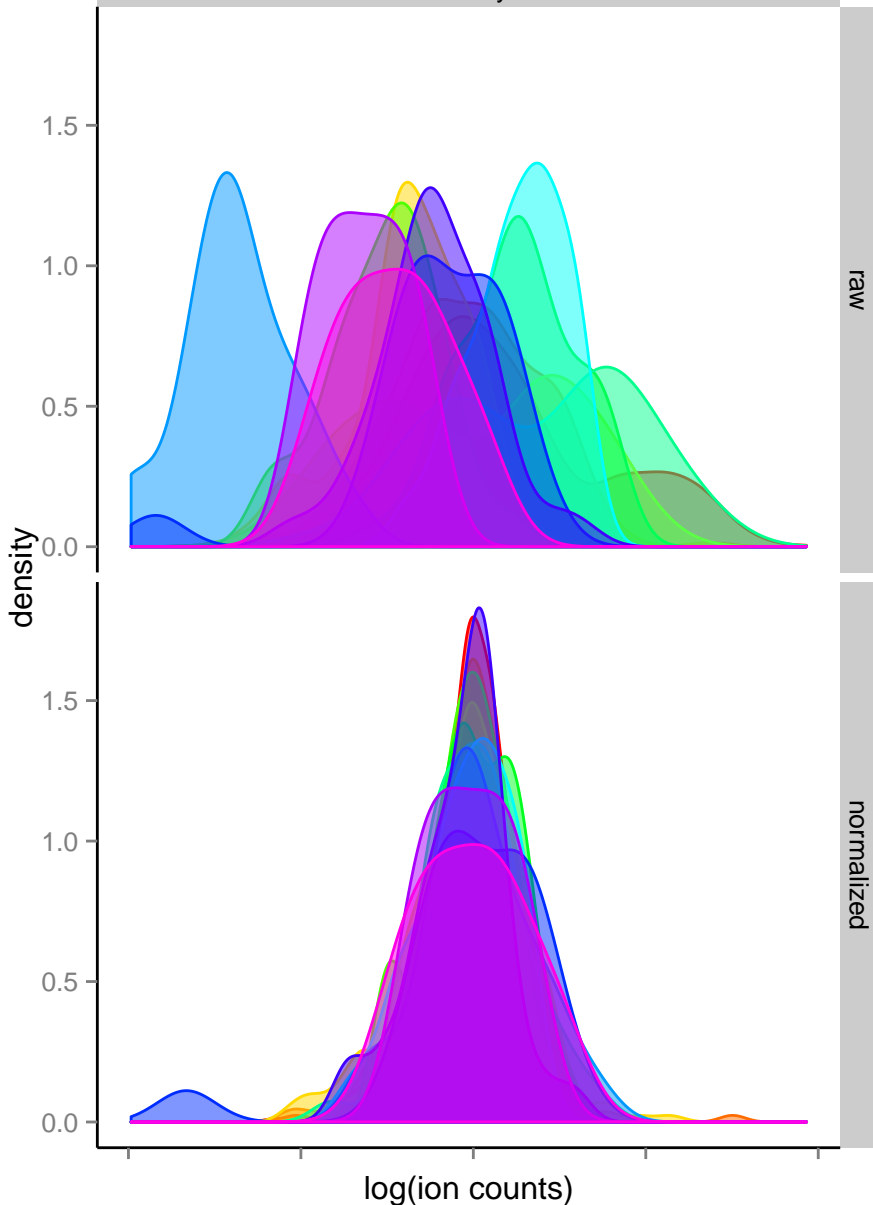

**PLATFORMRUNDAY\_miss**

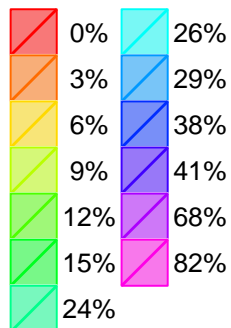

# X-04500

runday

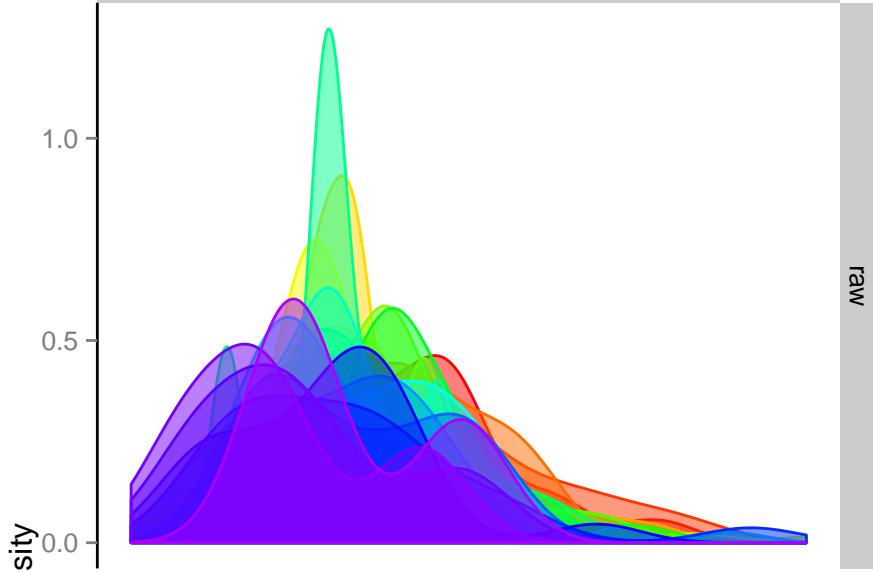

raw

## PLATFORMRUNDAY\_miss

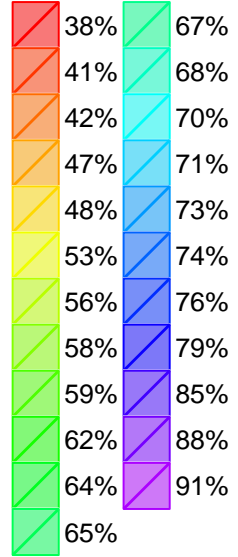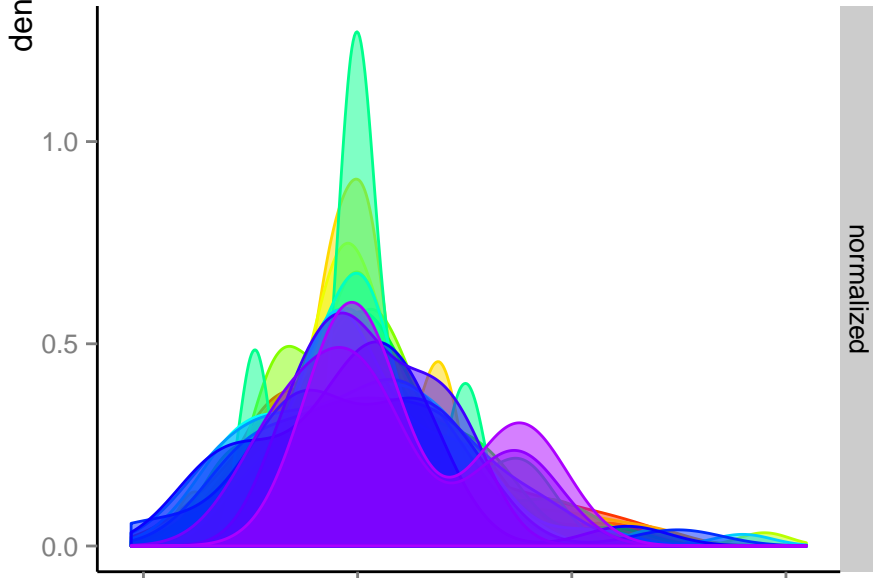

normalized

log(ion counts)



# chiro-inositol

runday

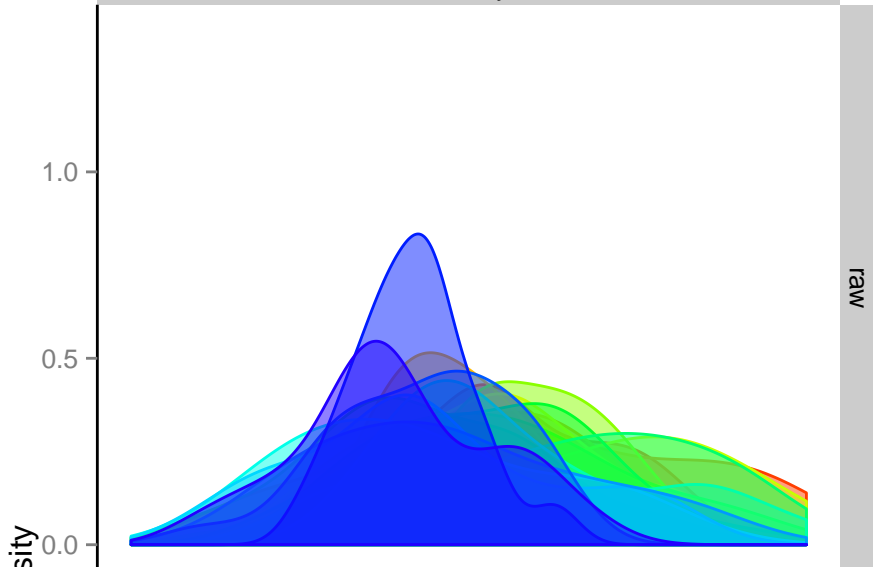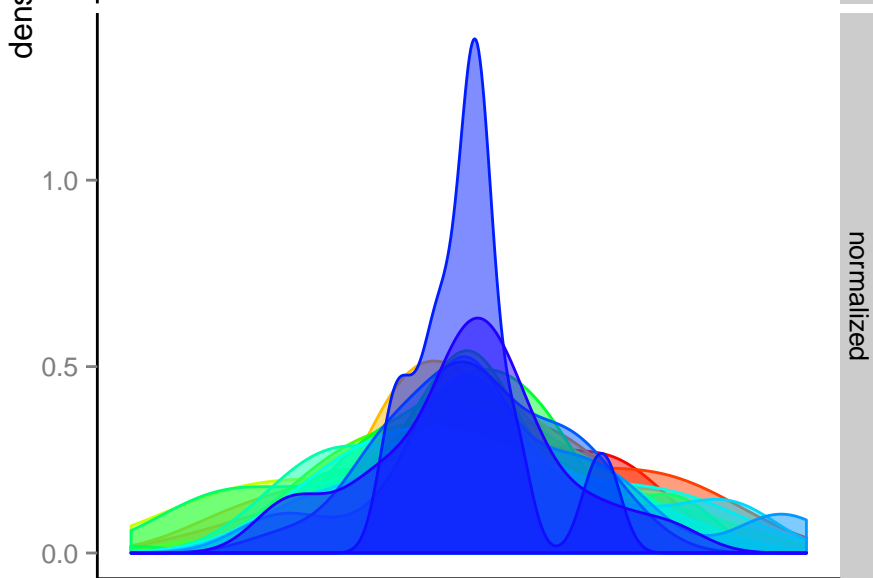

log(ion counts)

**PLATFORMRUNDAY\_miss**

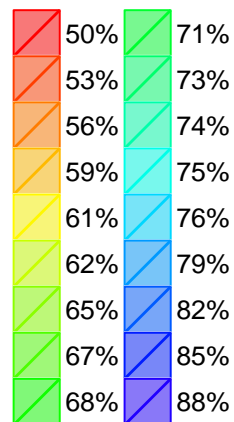

# X-04621

runday

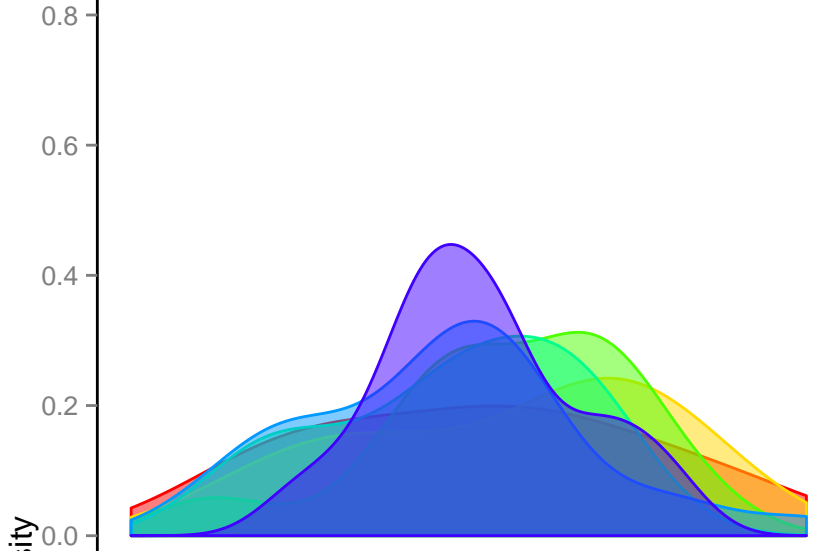

raw

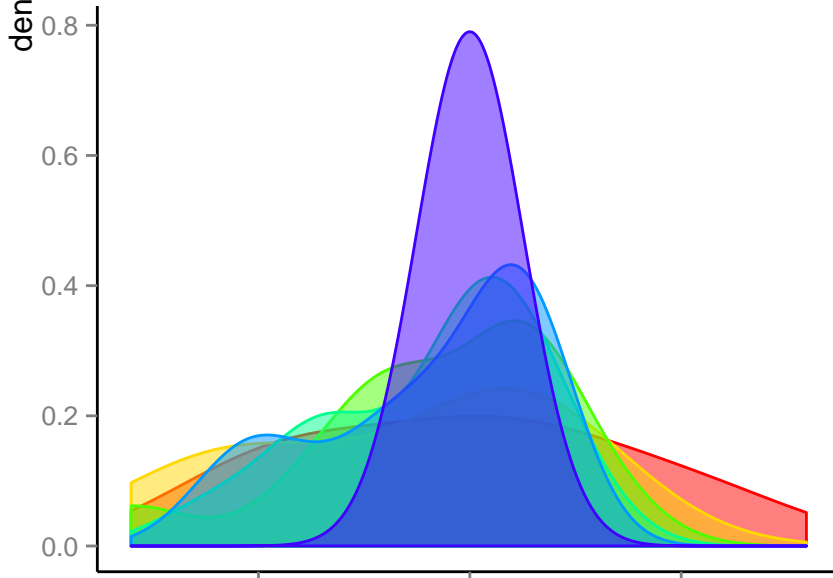

normalized

## PLATFORMRUNDAY\_miss

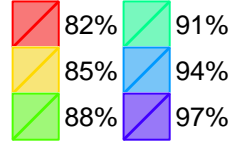

log(ion counts)

X-05426

runday

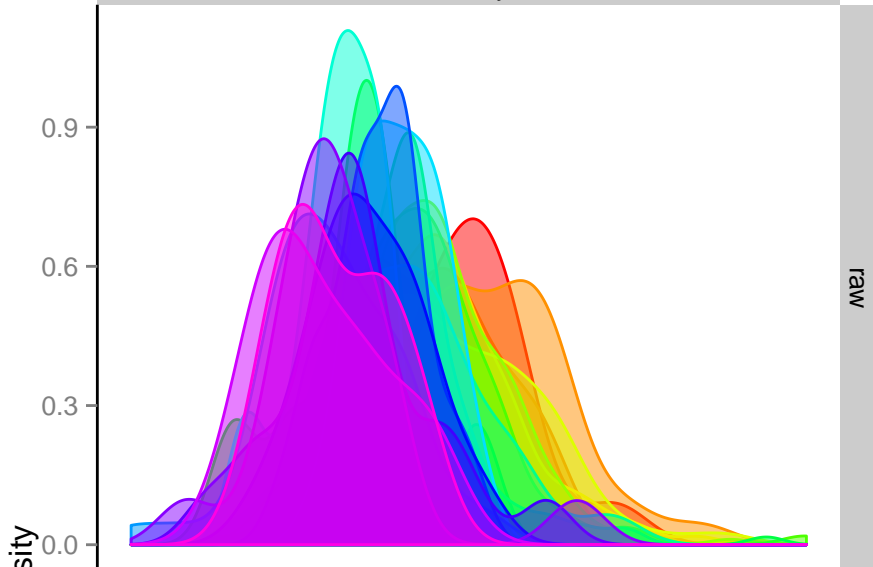

raw

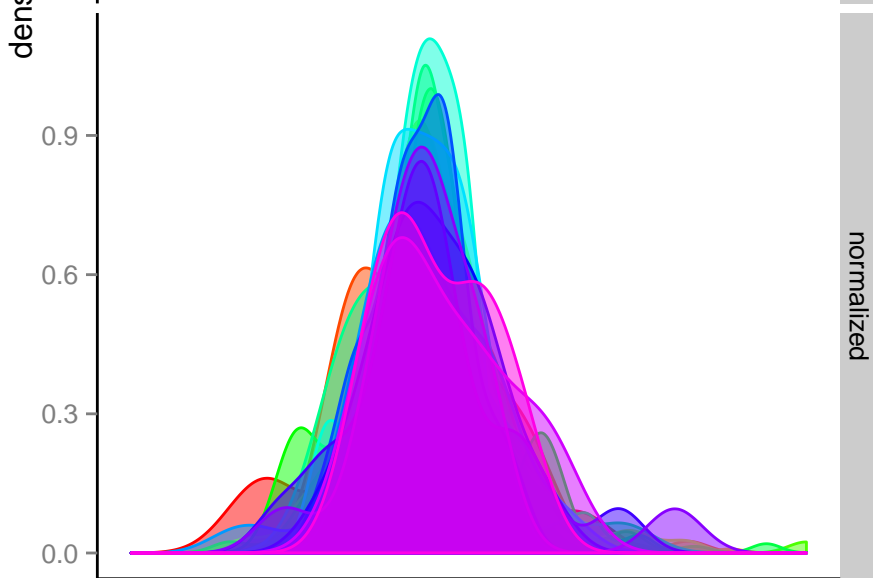

normalized

PLATFORMRUNDAY\_miss

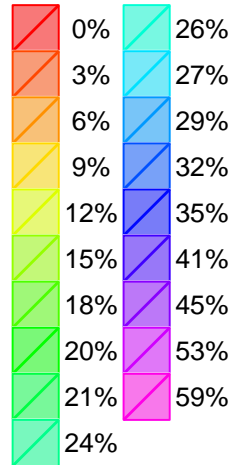

log(ion counts)

# 2-hydroxyglutarate

runday

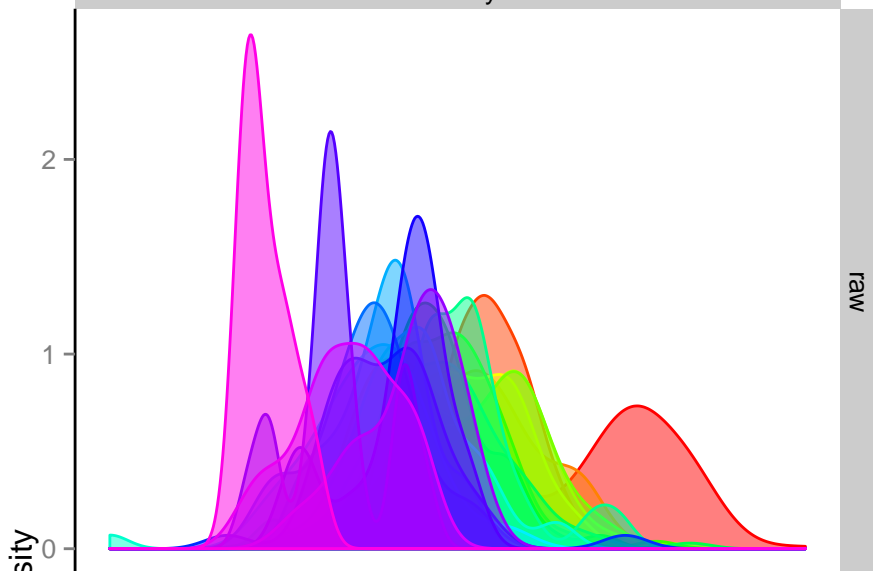

raw

## PLATFORMRUNDAY\_miss

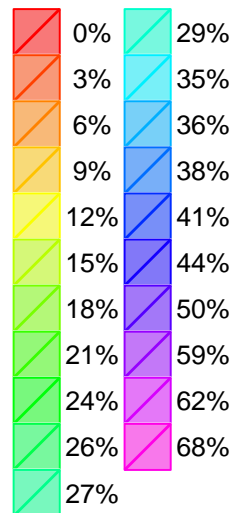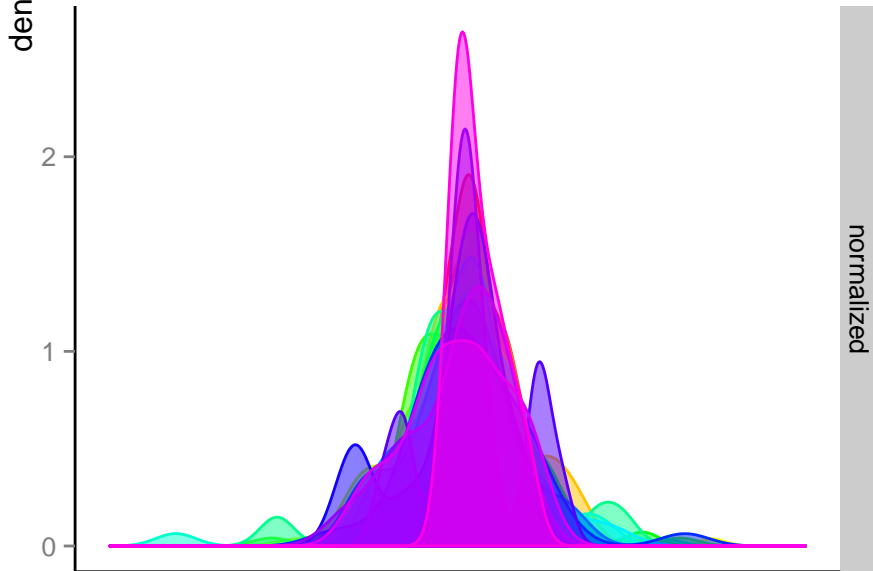

normalized

log(ion counts)

X-05907

runday

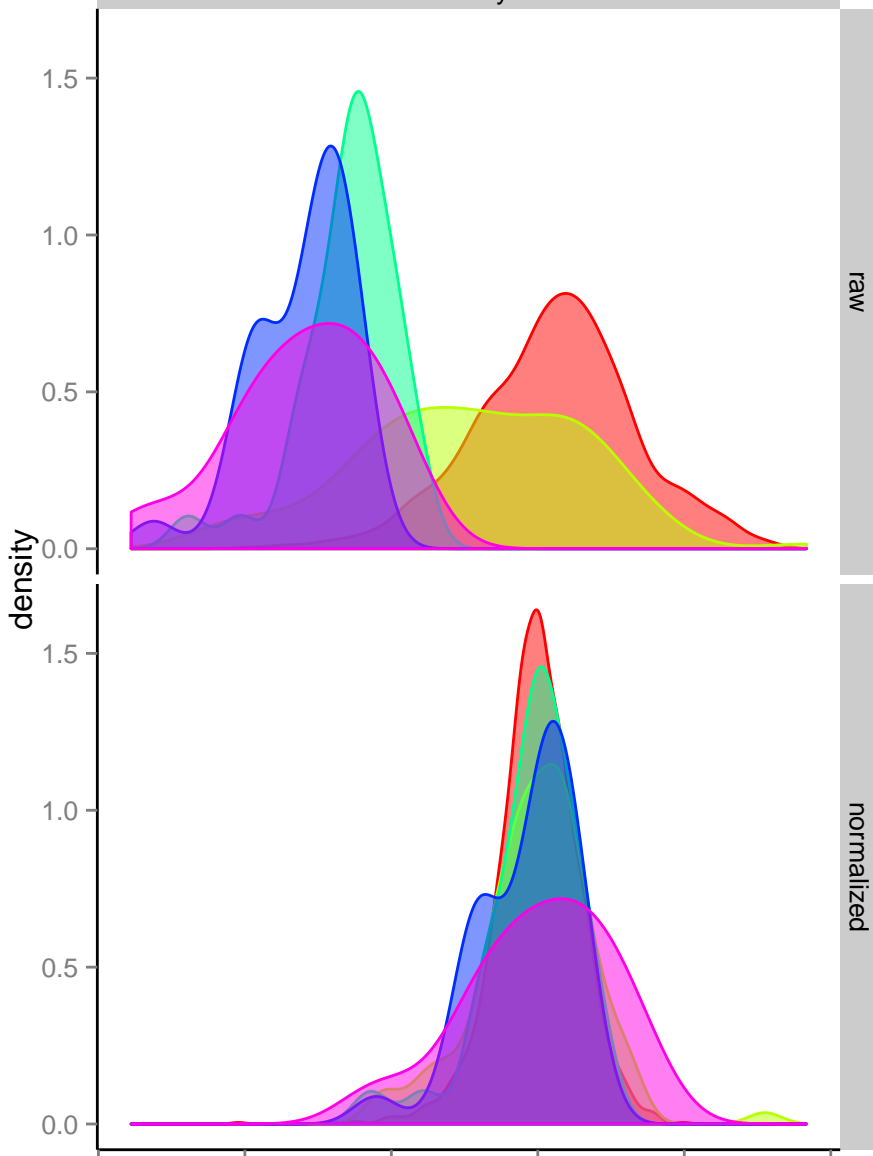

**PLATFORMRUNDAY\_miss**

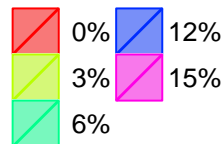

X-06126

runday

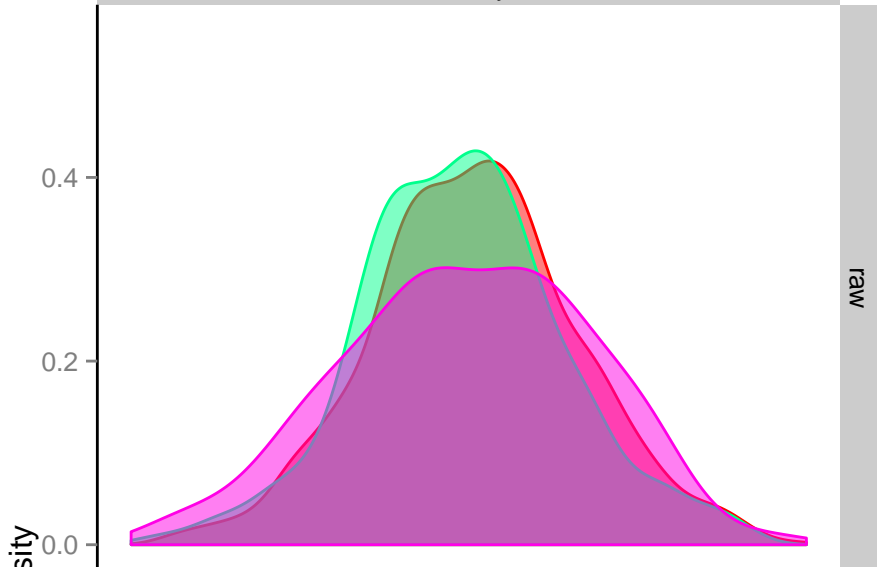

raw

**PLATFORMRUNDAY\_miss**

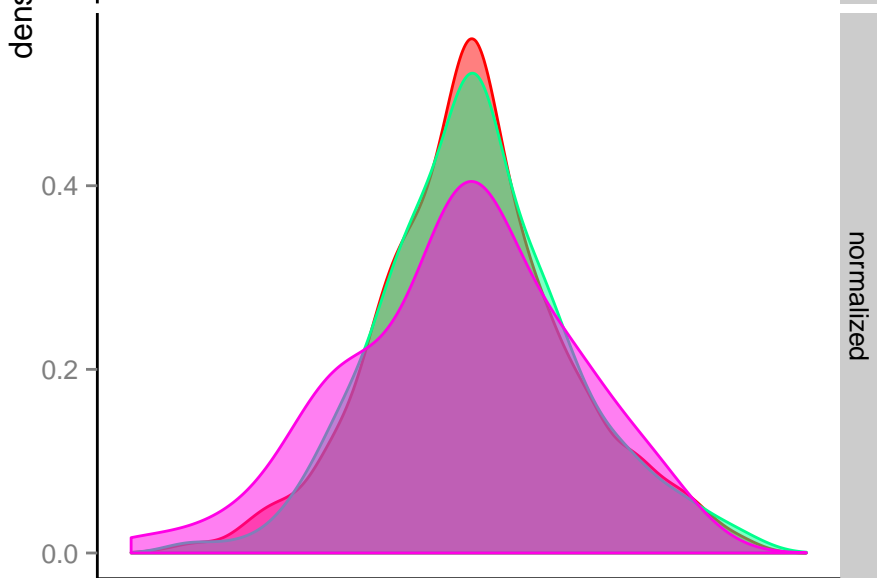

normalized

log(ion counts)

X-06226

runday

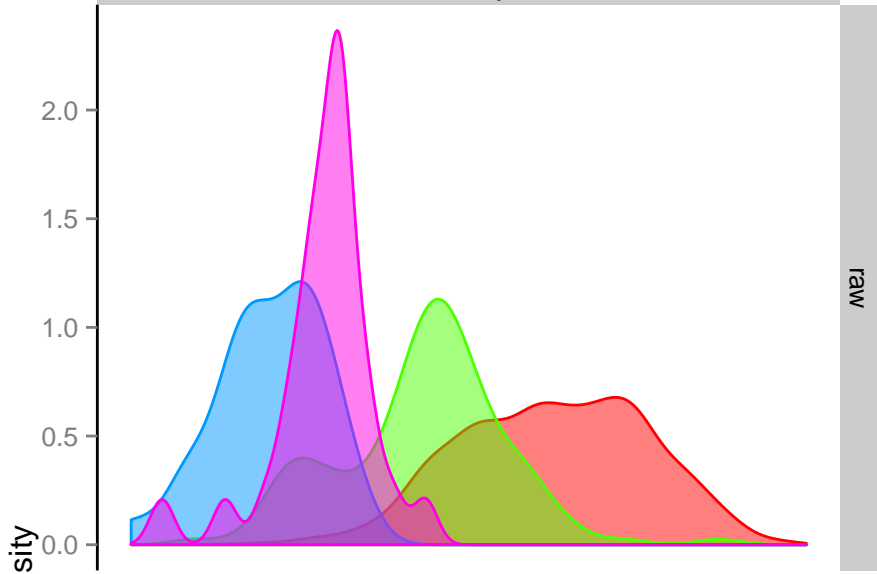

raw

**PLATFORMRUNDAY\_miss**

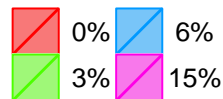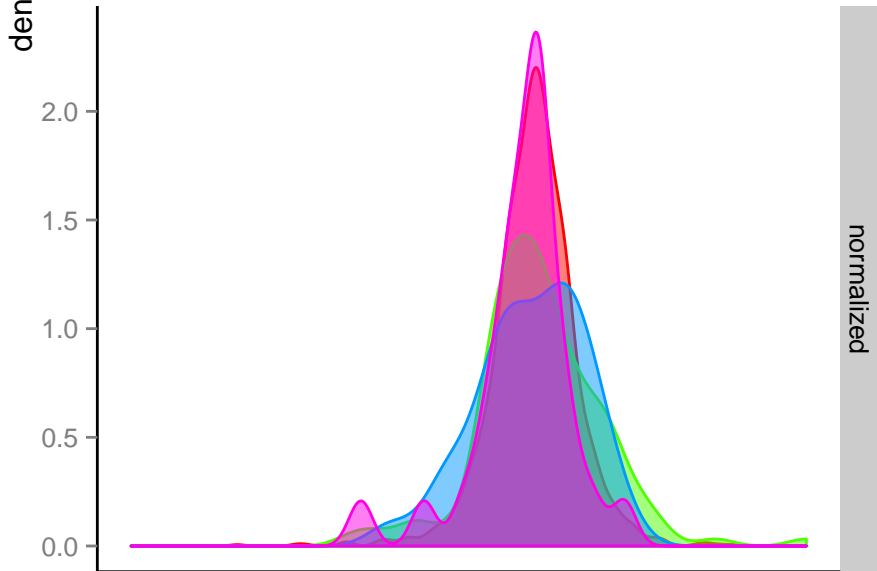

normalized

log(ion counts)

# X-06227

runday

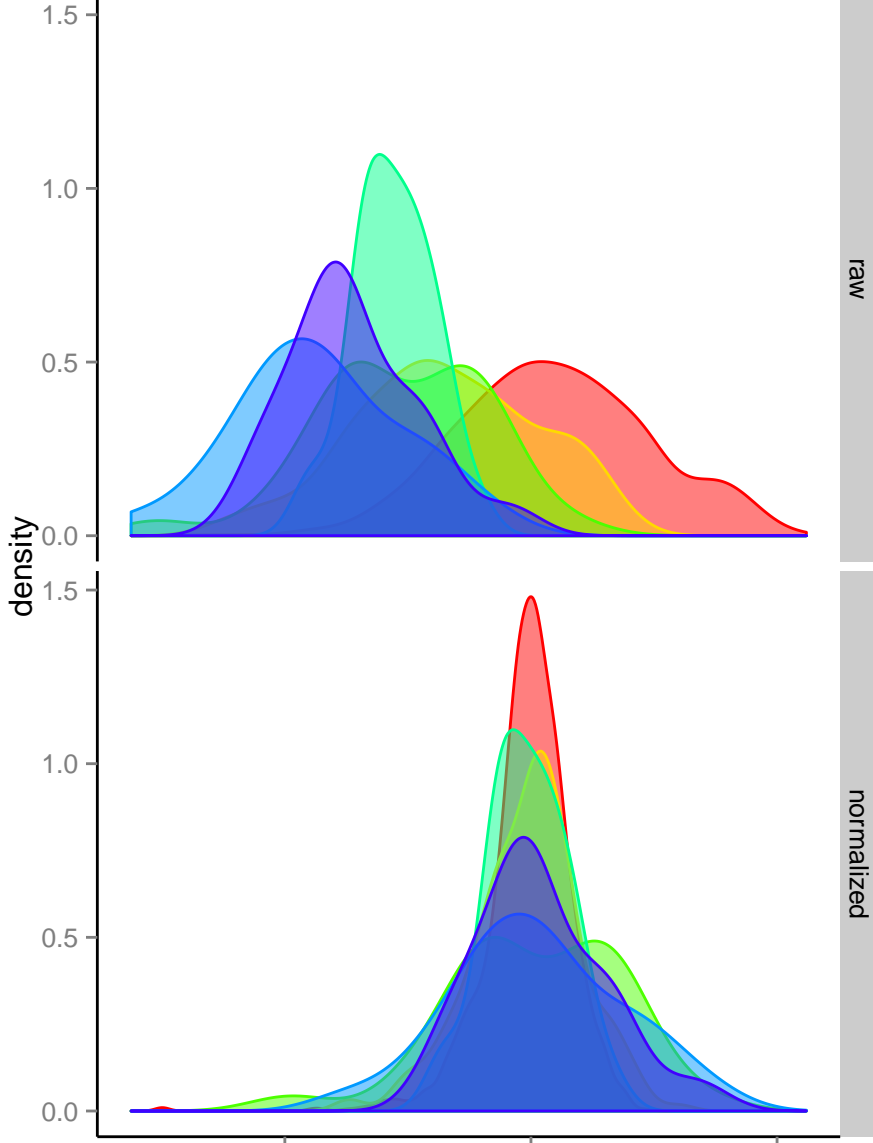

## PLATFORMRUNDAY\_miss

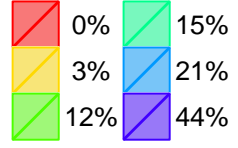



X-06246

runday

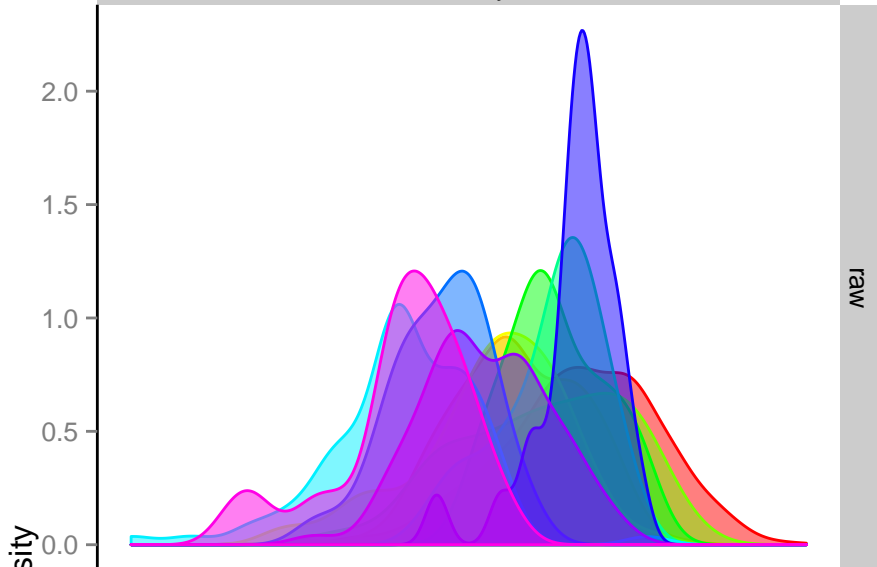

raw

**PLATFORMRUNDAY\_miss**

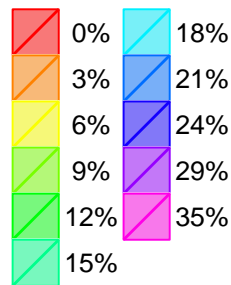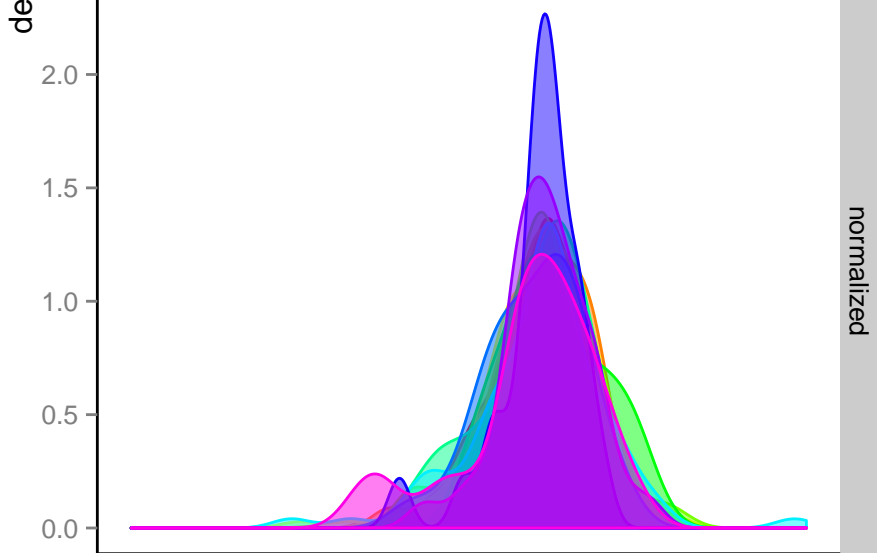

normalized

log(ion counts)

X-06267

runday

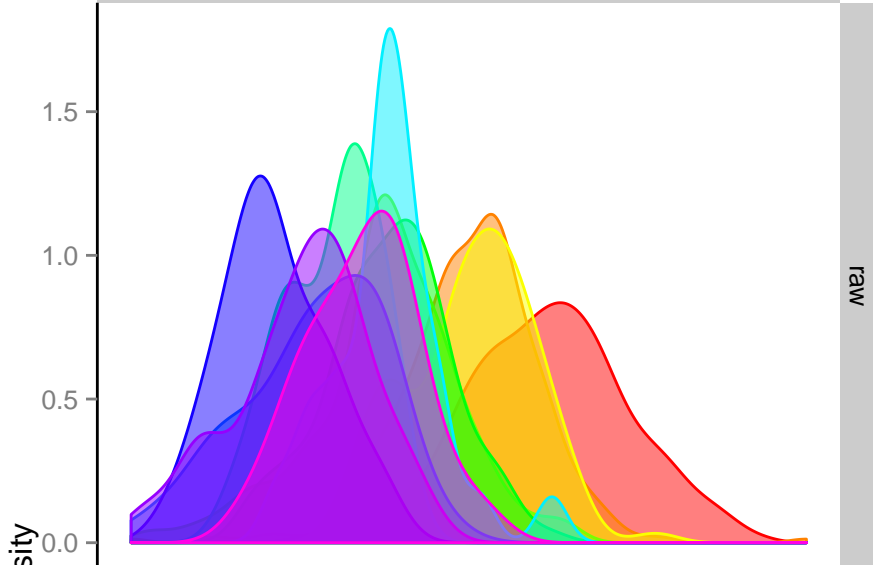

raw

**PLATFORMRUNDAY\_miss**

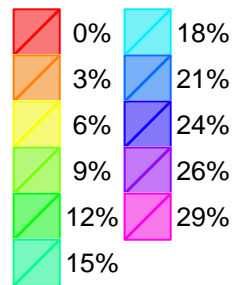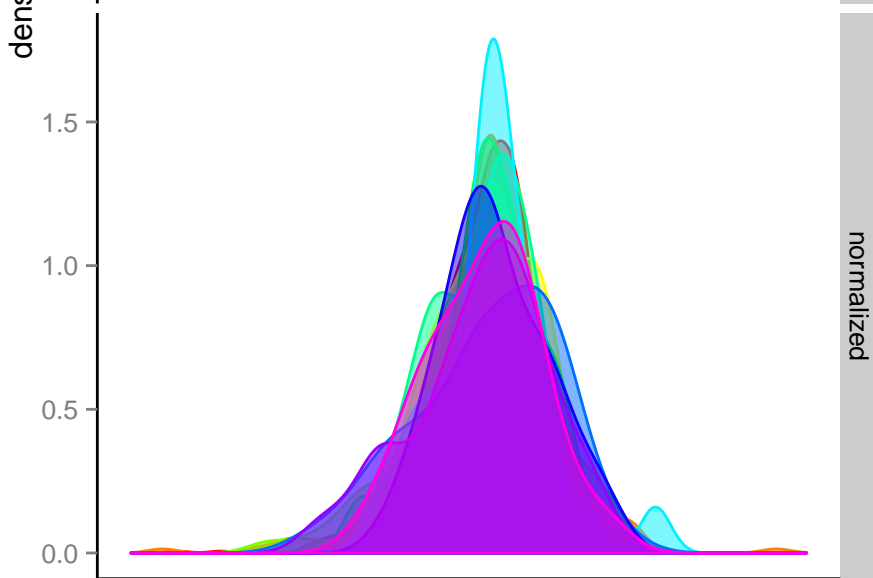

normalized

log(ion counts)

X-06307

runday

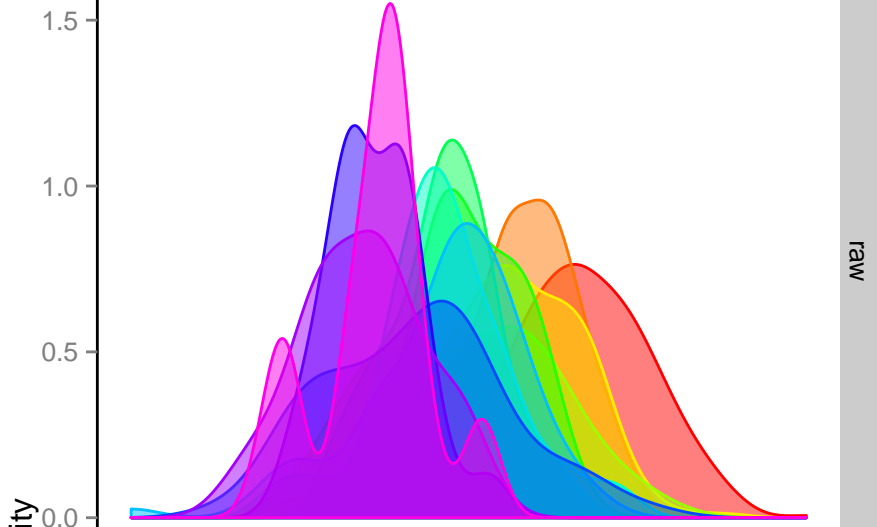

raw

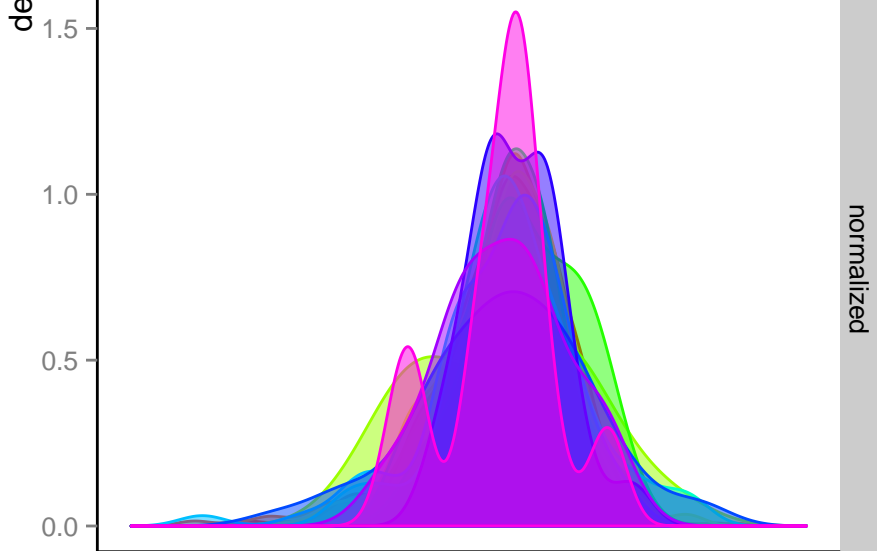

normalized

**PLATFORMRUNDAY\_miss**

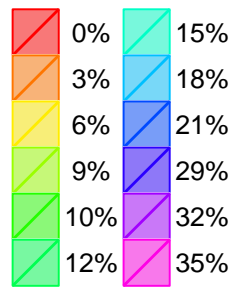

log(ion counts)

X-06350

runday

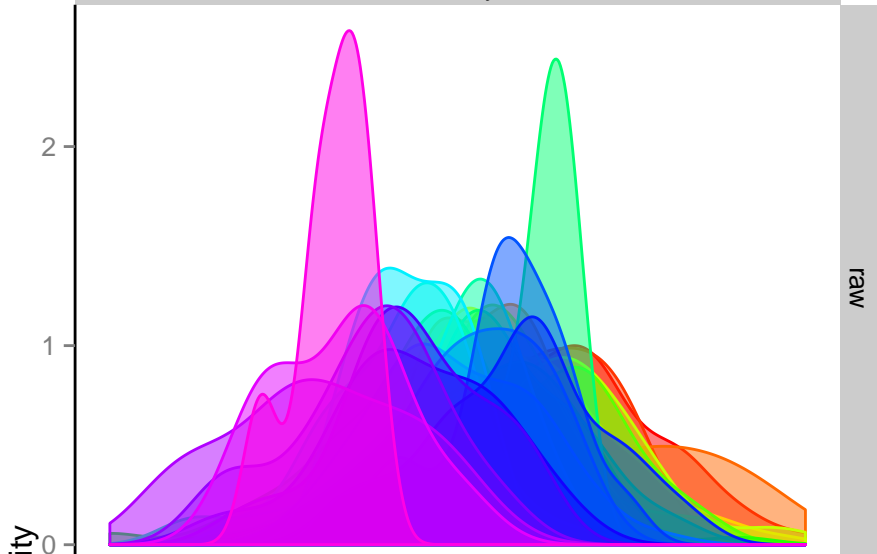

raw

**PLATFORMRUNDAY\_miss**

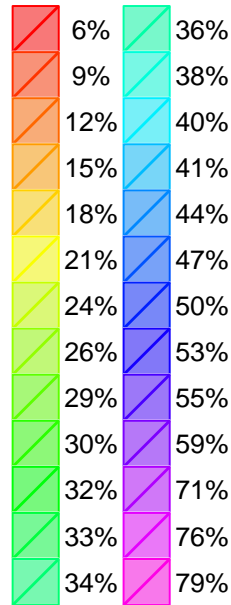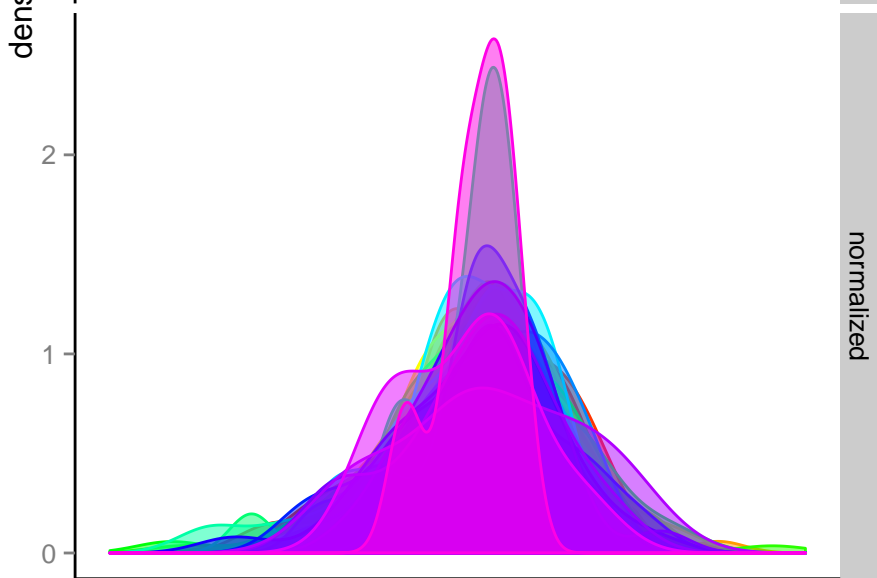

normalized

log(ion counts)

# X-06351

runday

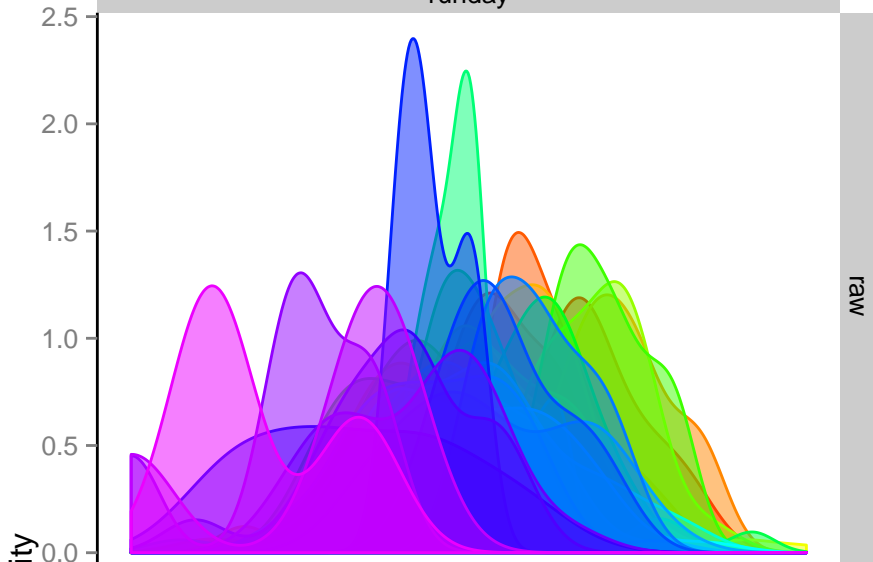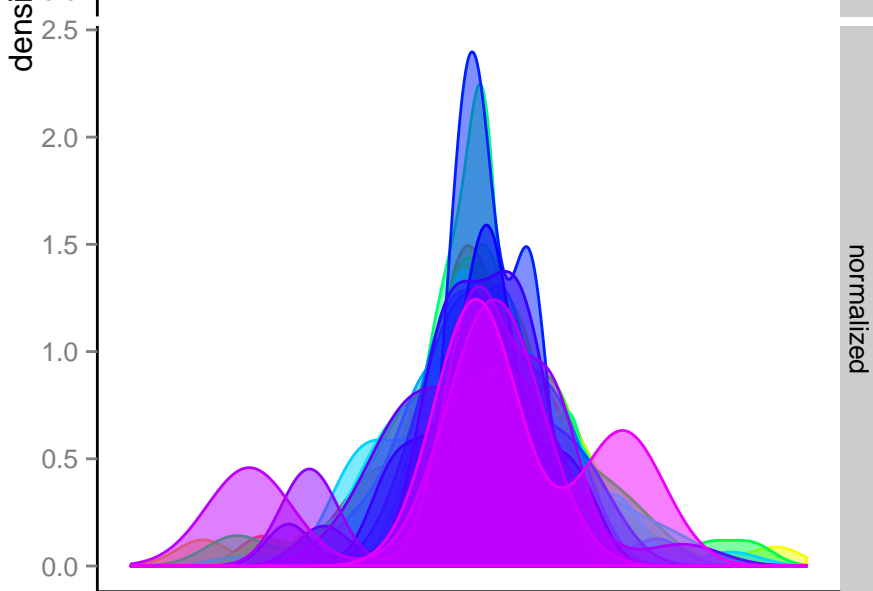

log(ion counts)

## PLATFORMRUNDAY\_miss

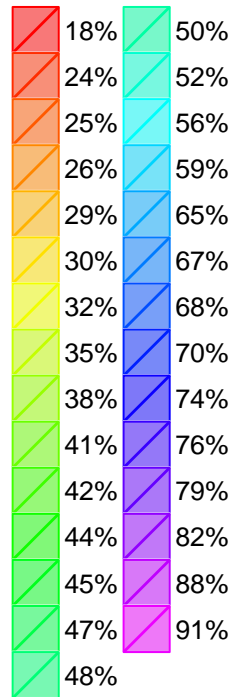

# X-07765

runday

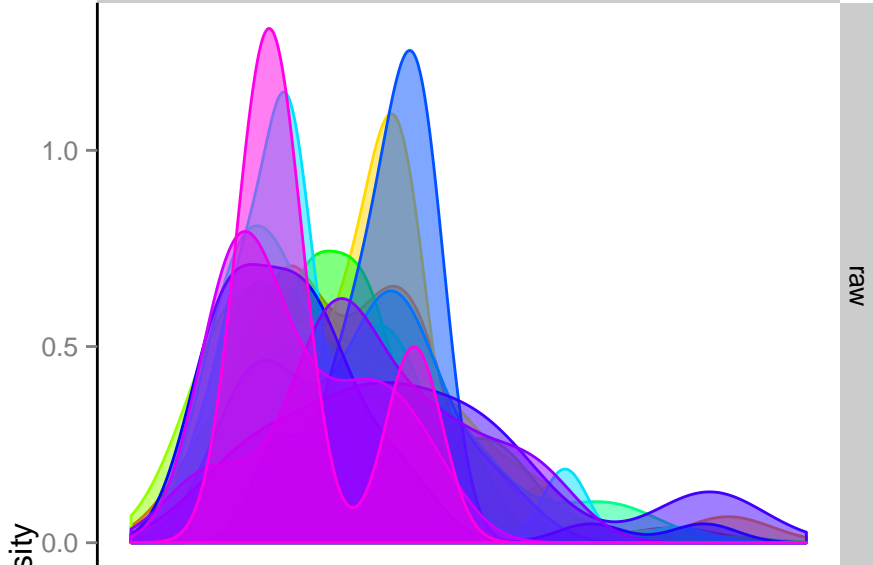

raw

## PLATFORMRUNDAY\_miss

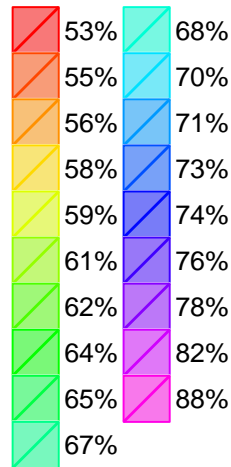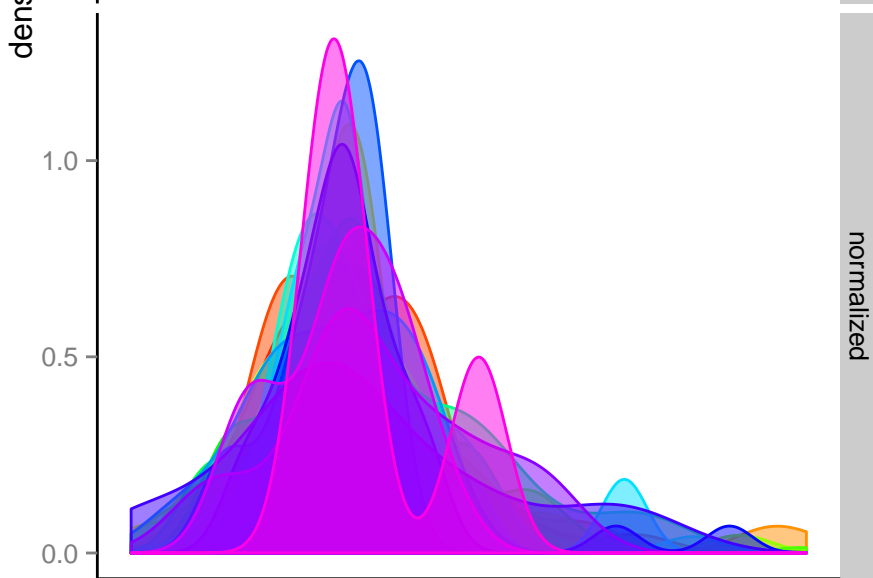

normalized

log(ion counts)

X-08402

runday

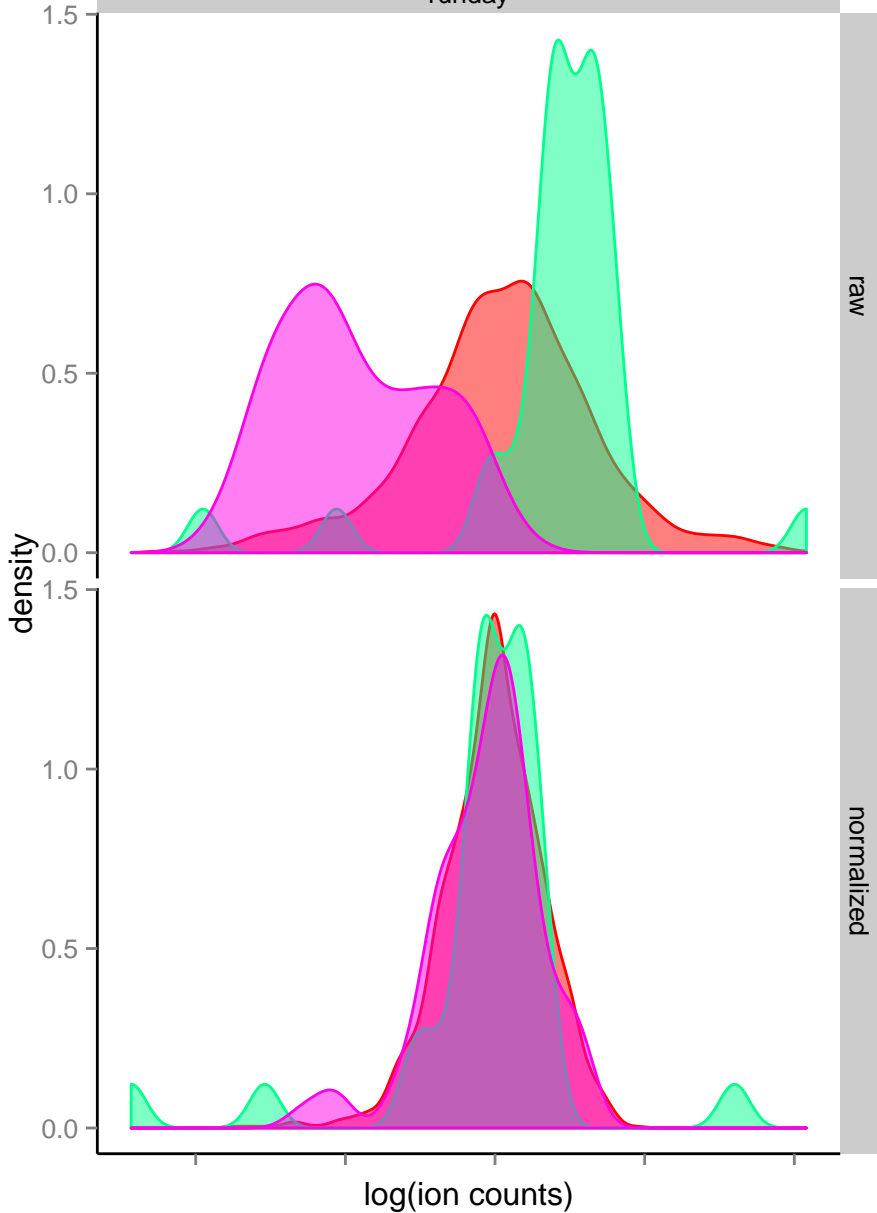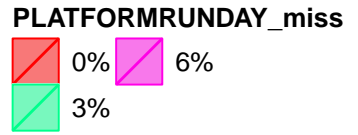

# X-08766

runday

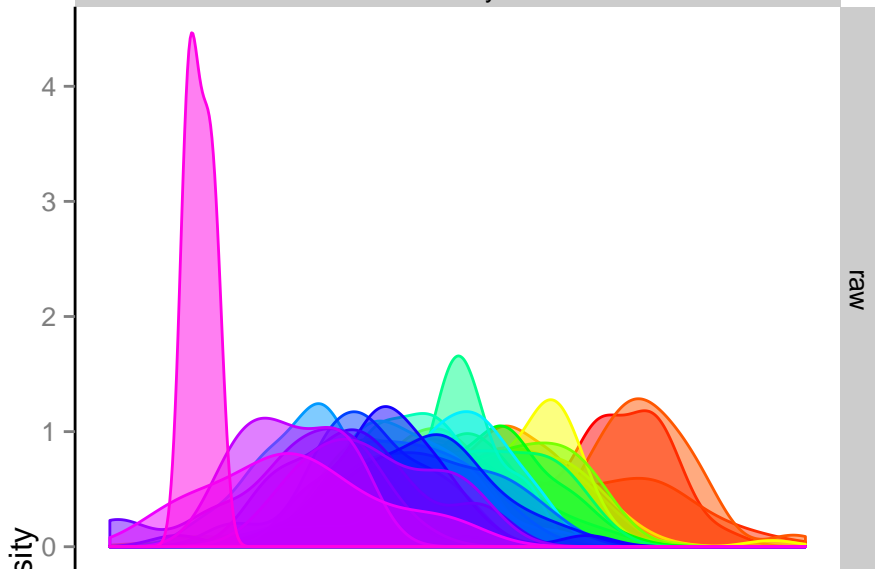

raw

## PLATFORMRUNDAY\_miss

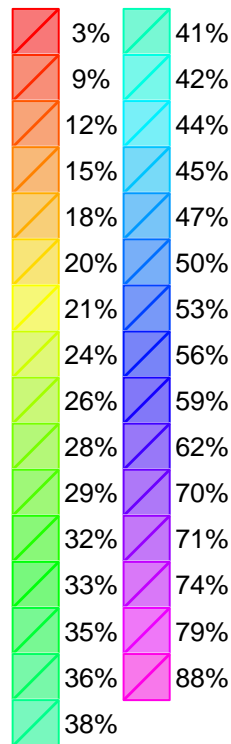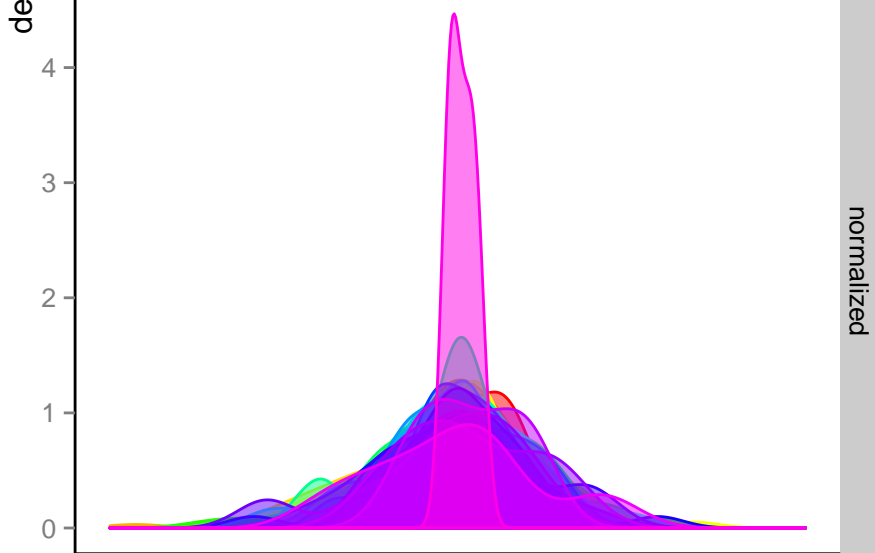

normalized

log(ion counts)



X-08988

runday

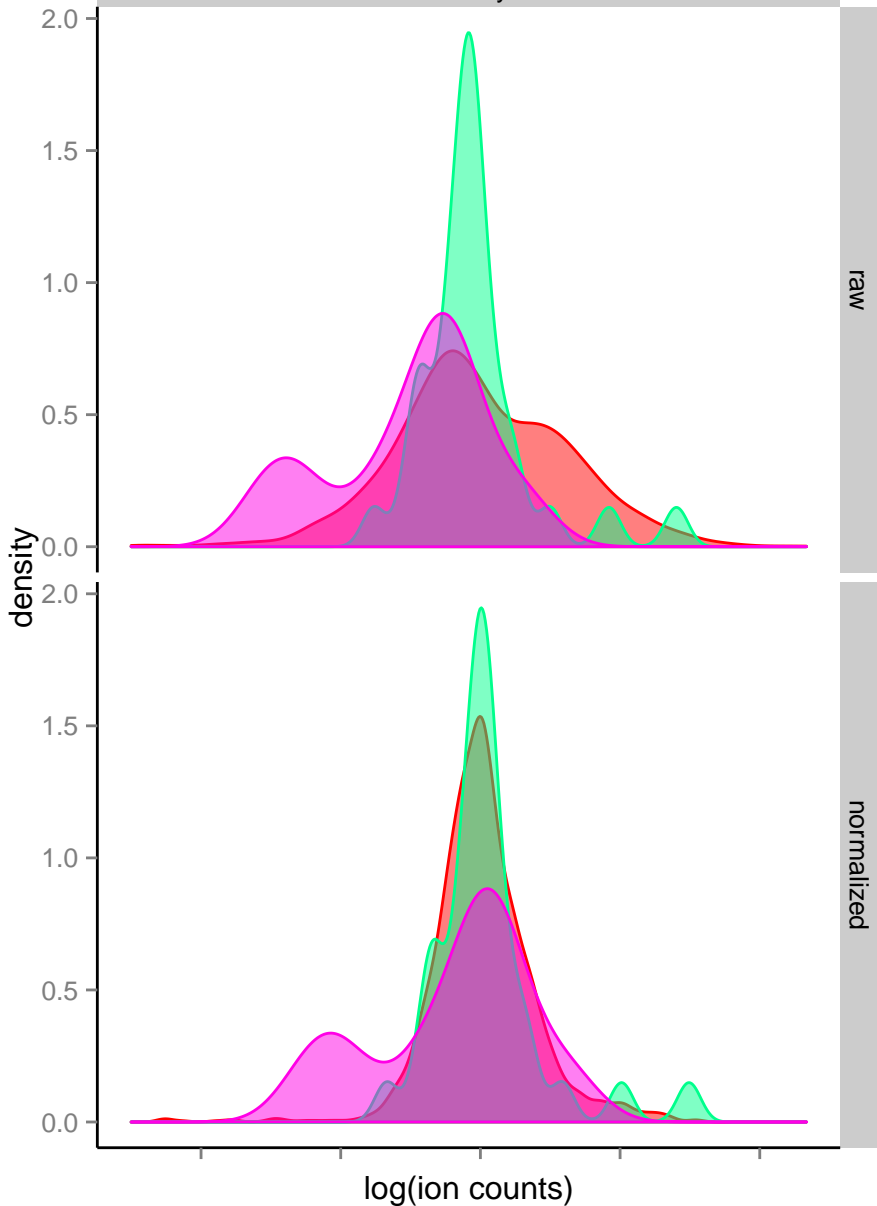

raw

normalized

**PLATFORMRUNDAY\_miss**

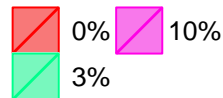

log(ion counts)

X-09026

runday

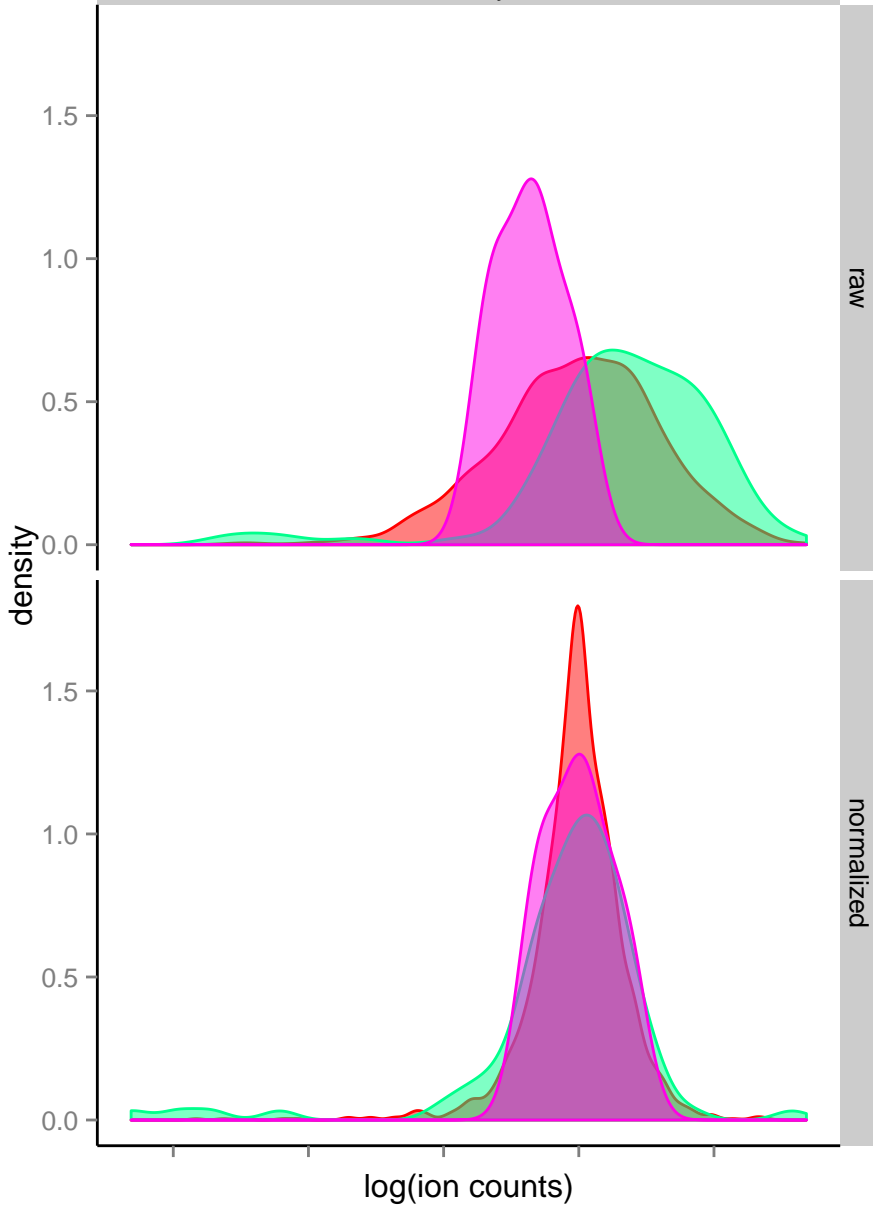

raw

normalized

**PLATFORMRUNDAY\_miss**

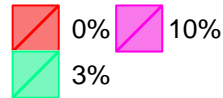

X-09108

runday

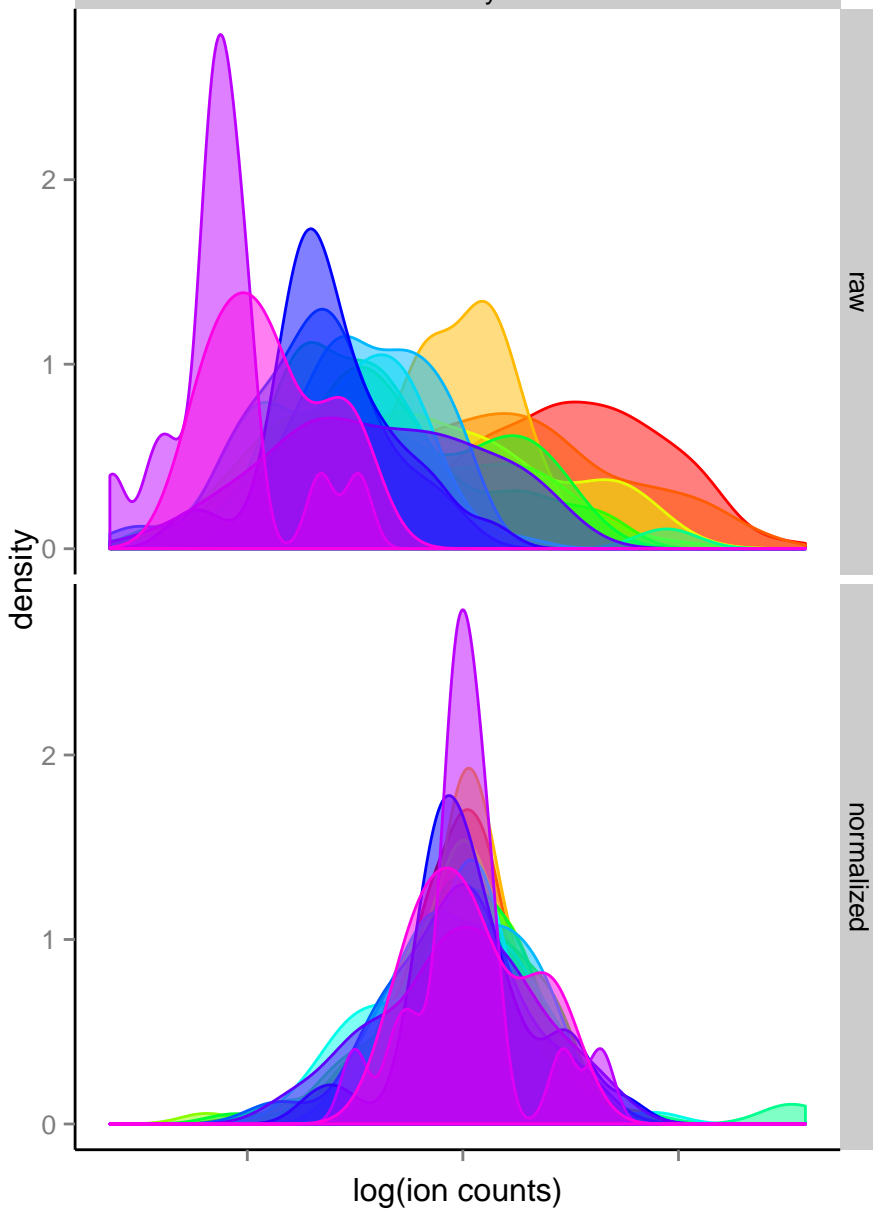

PLATFORMRUNDAY\_miss

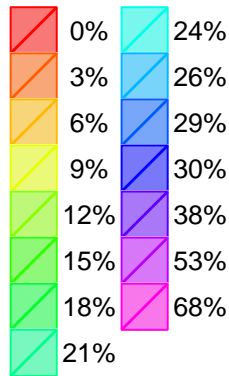

X-09706

runday

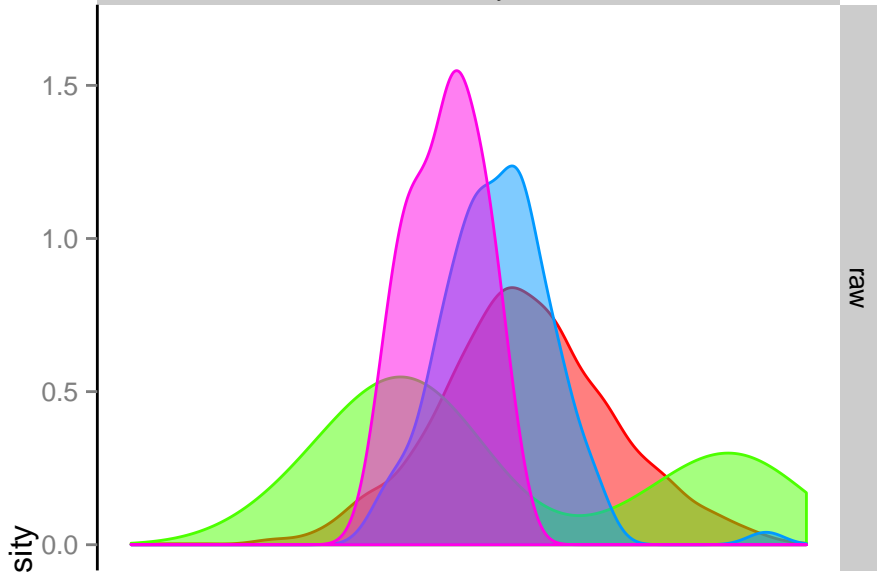

raw

**PLATFORMRUNDAY\_miss**

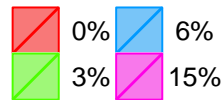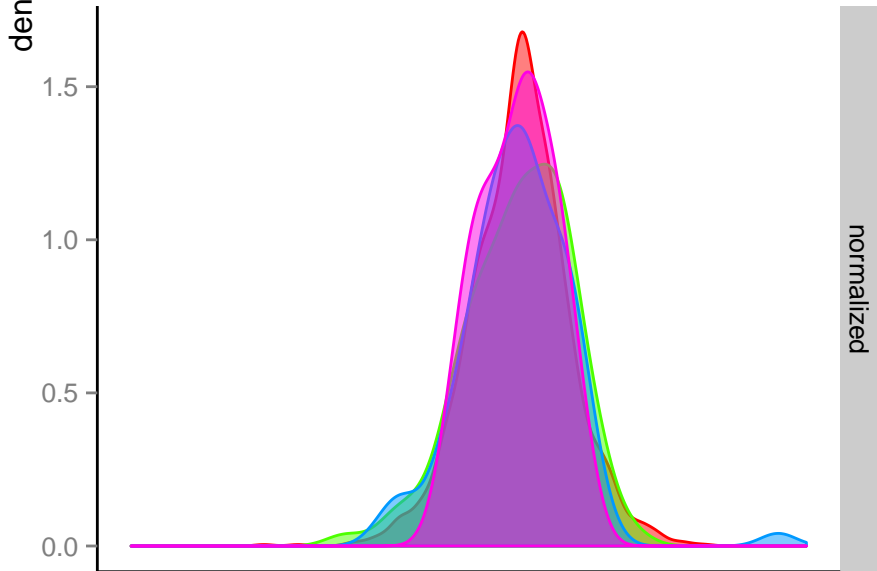

normalized

log(ion counts)

X-09789

runday

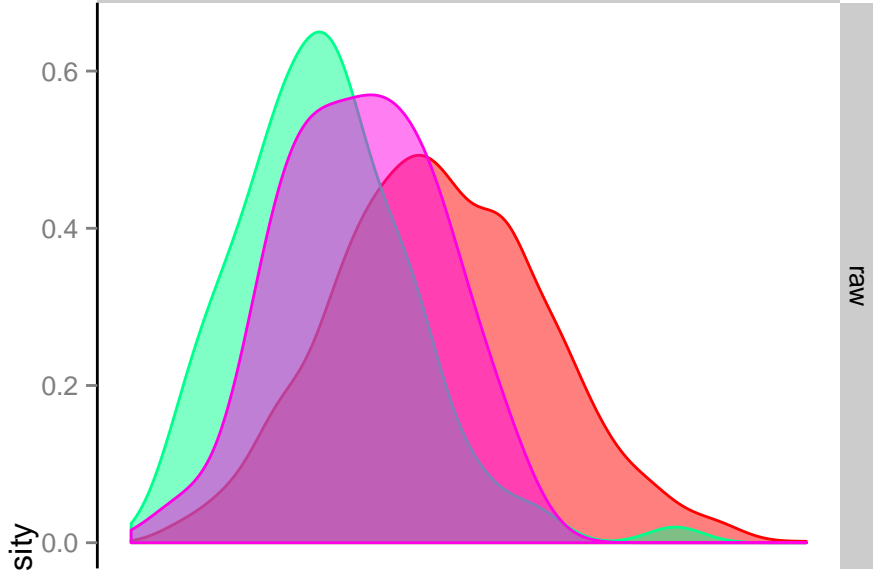

raw

**PLATFORMRUNDAY\_miss**

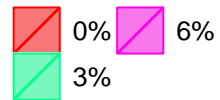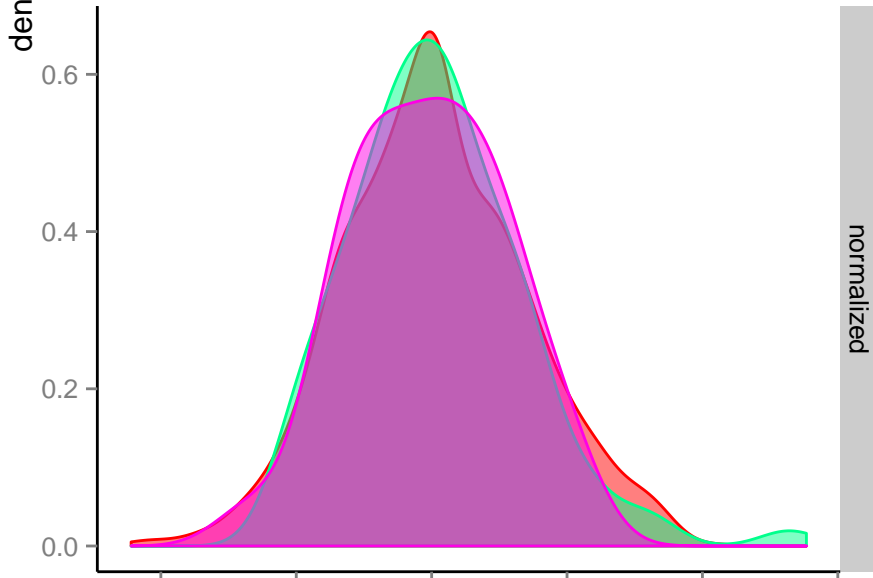

normalized

log(ion counts)

# X-10346

runday

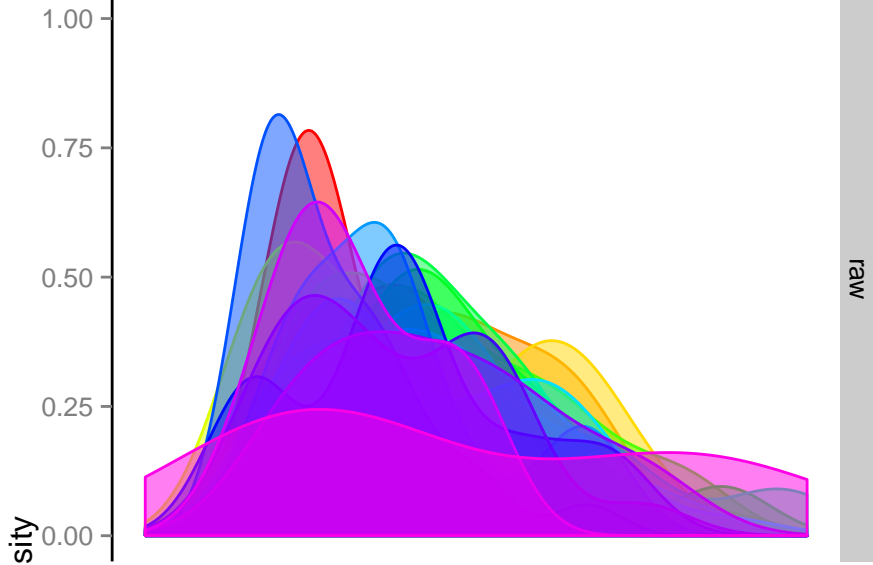

raw

## PLATFORMRUNDAY\_miss

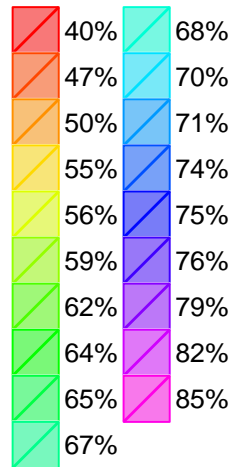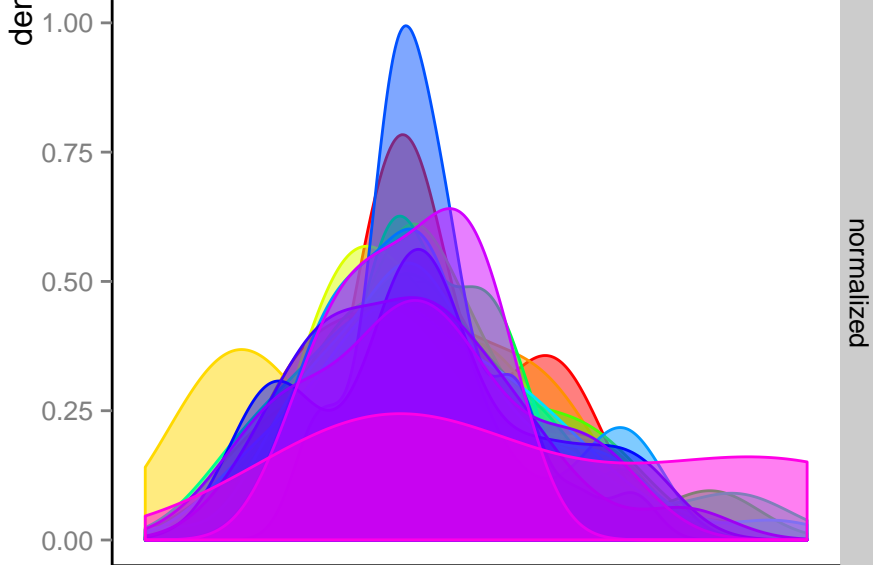

normalized

log(ion counts)

X-10395

runday

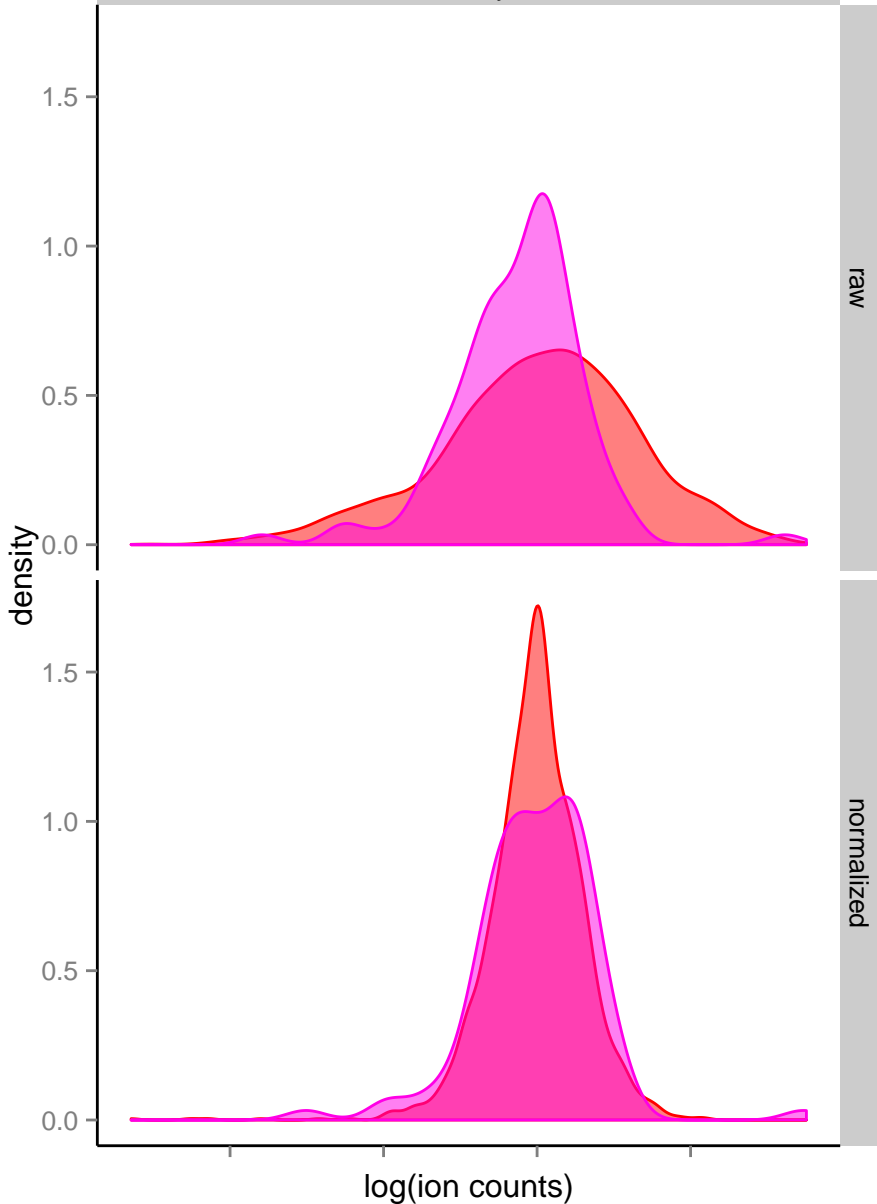

raw

normalized

PLATFORMRUNDAY\_miss

0% 3%

# palmitoyl sphingomyelin

runday

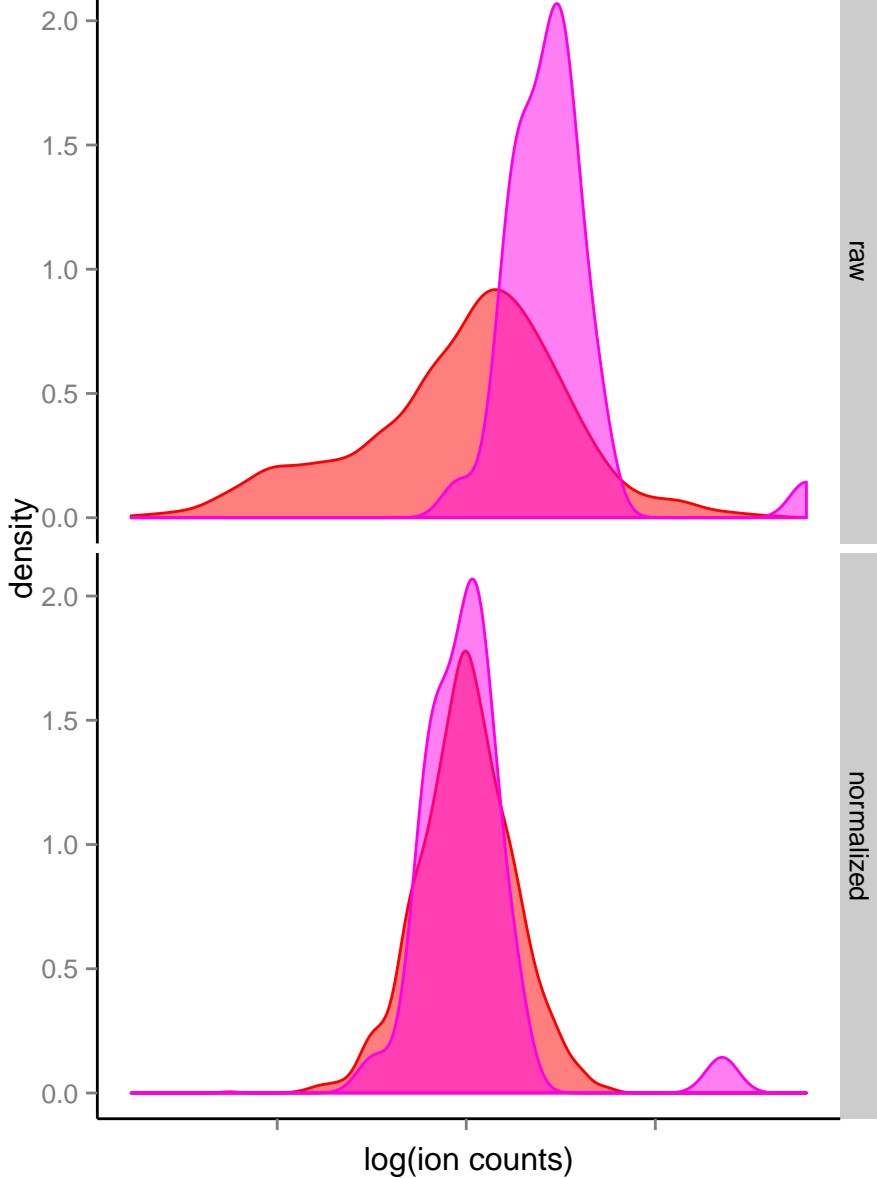

raw

normalized

**PLATFORMRUNDAY\_miss**



0%



3%



# X-10429

runday

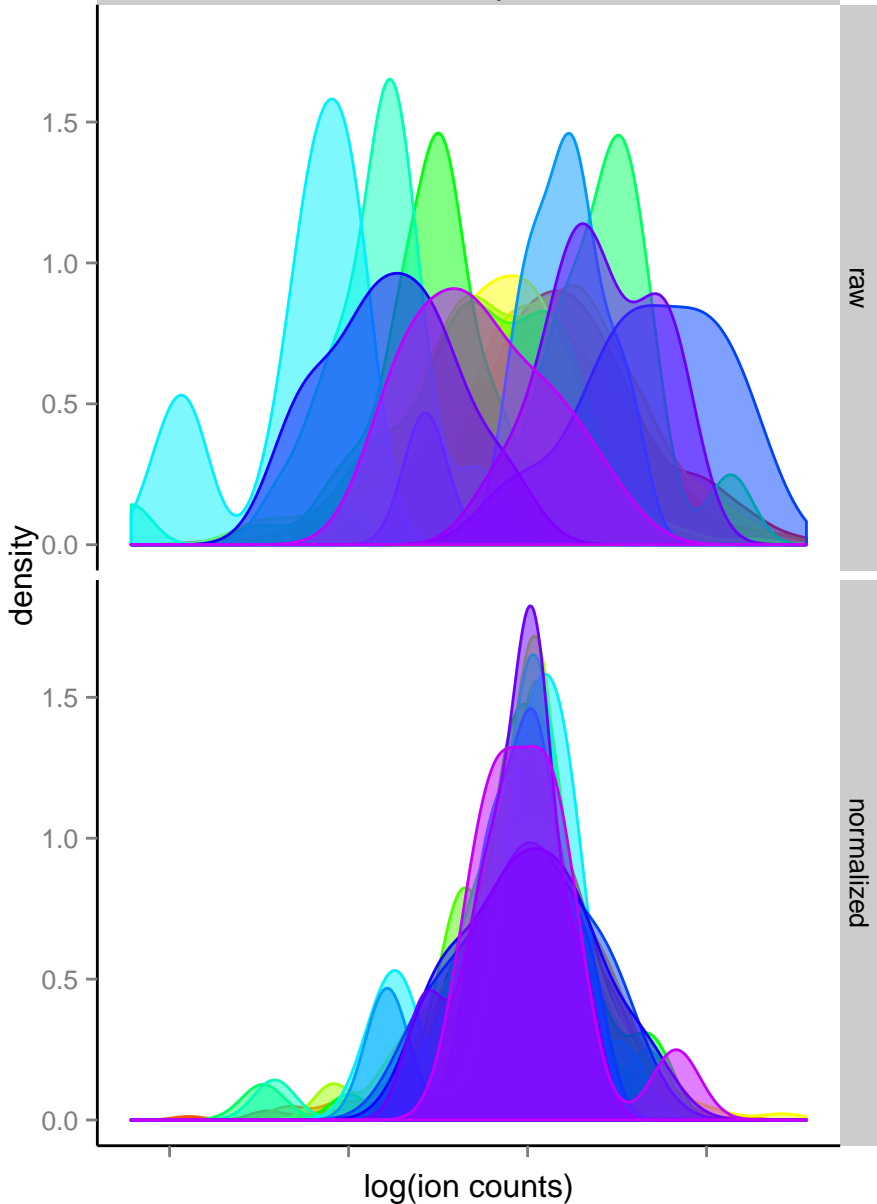

raw

normalized

## PLATFORMRUNDAY\_miss

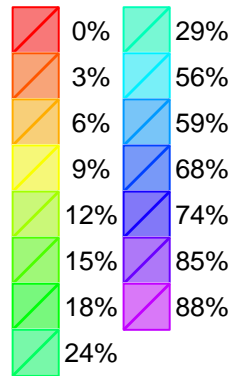

# X-10500

runday

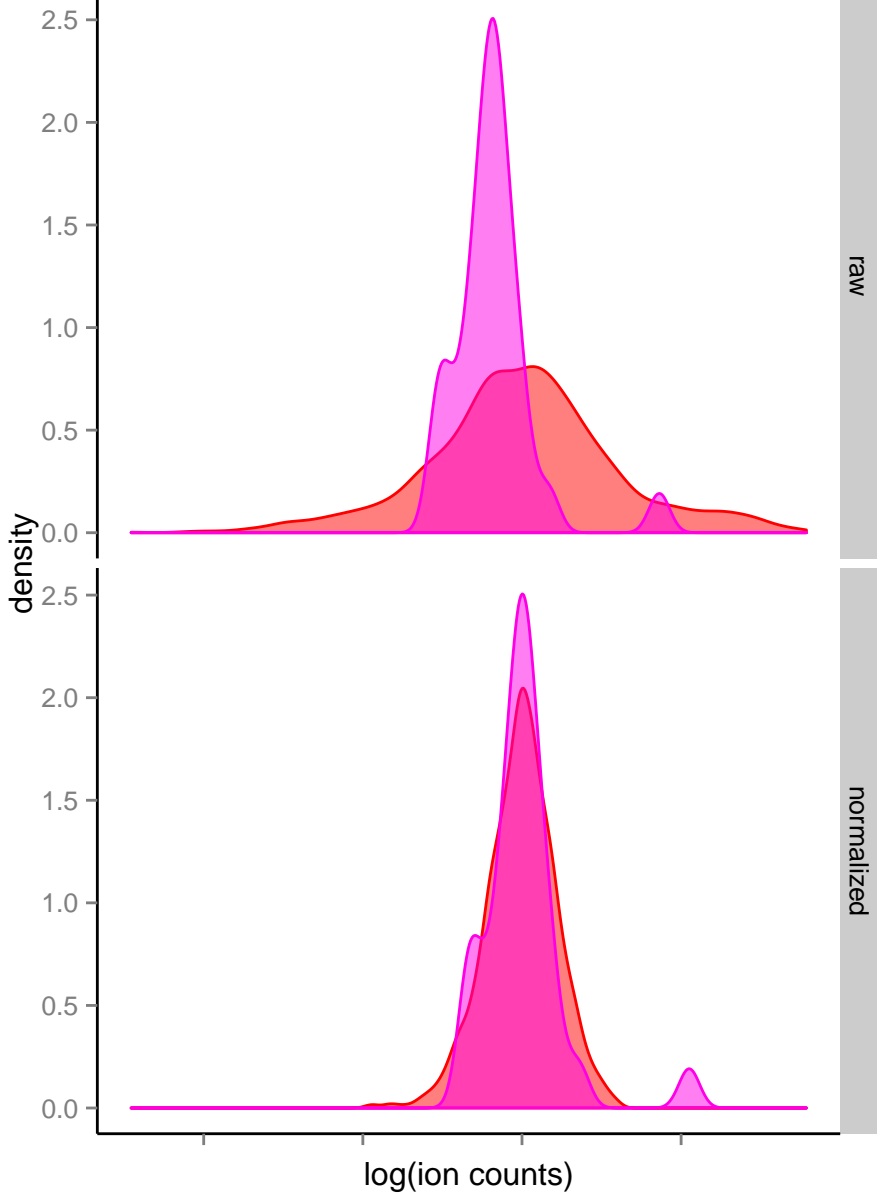

**PLATFORMRUNDAY\_miss**



0%

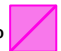

3%

X-10506

runday

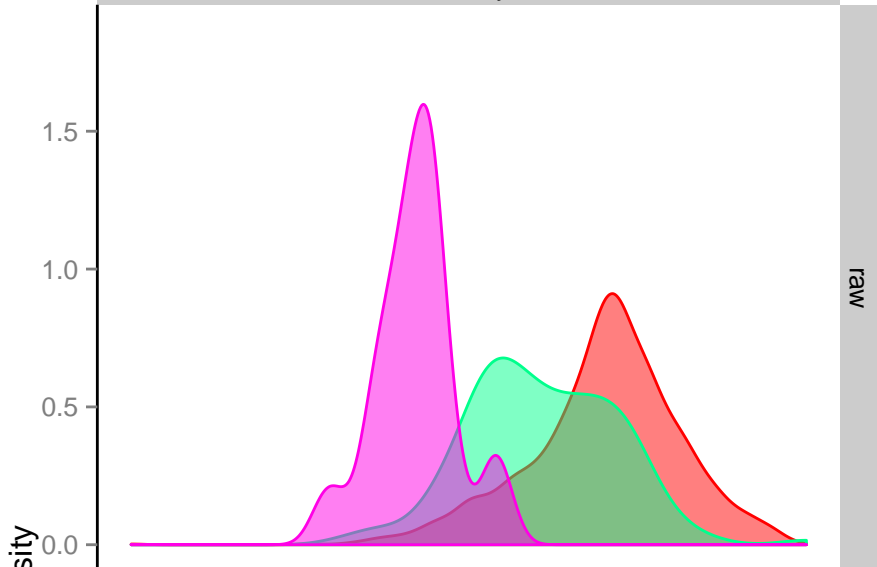

raw

**PLATFORMRUNDAY\_miss**

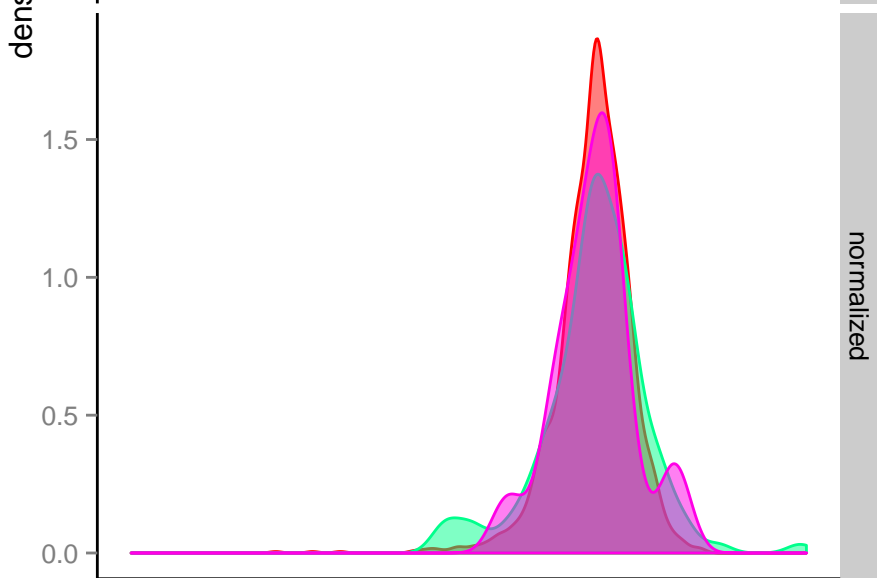

normalized

log(ion counts)

X-10510

runday

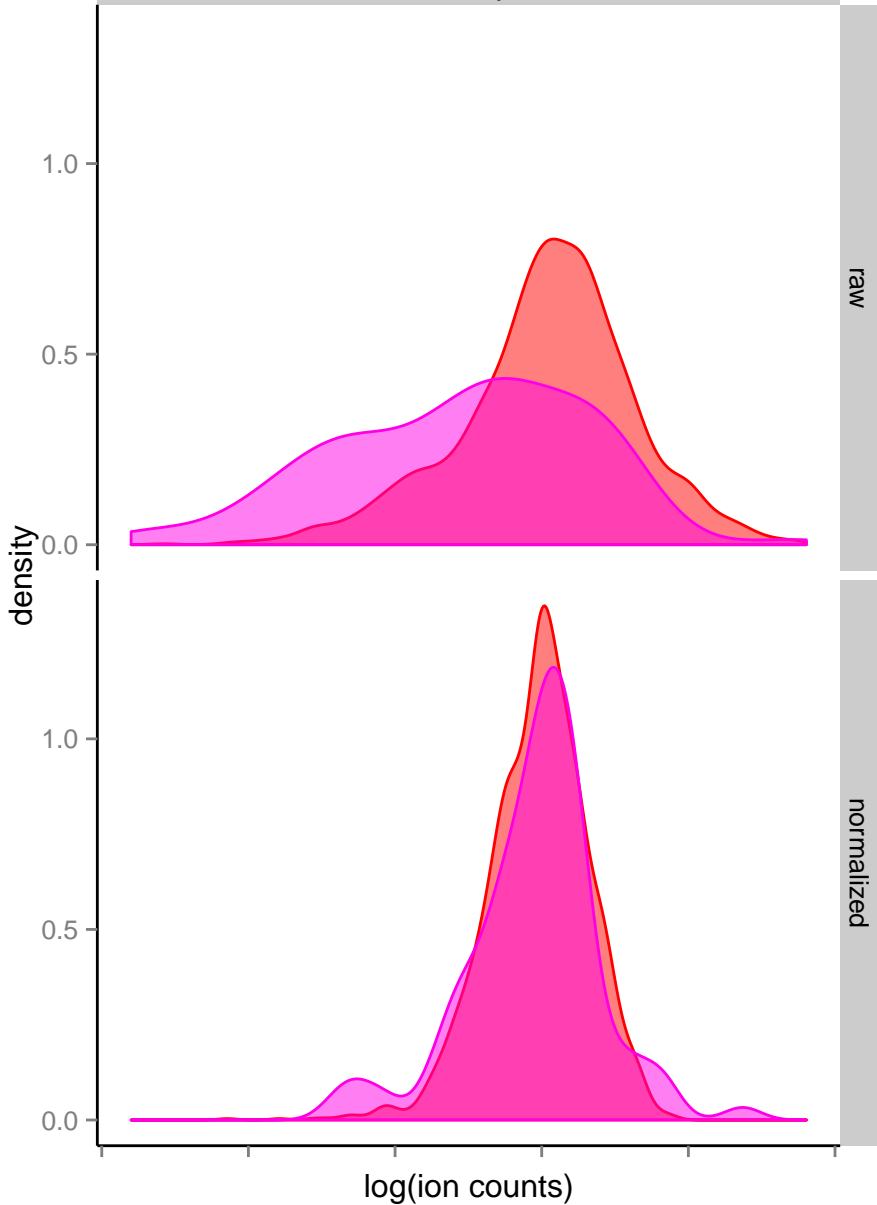

raw

normalized

PLATFORMRUNDAY\_miss



0%



3%

X-10675

runday

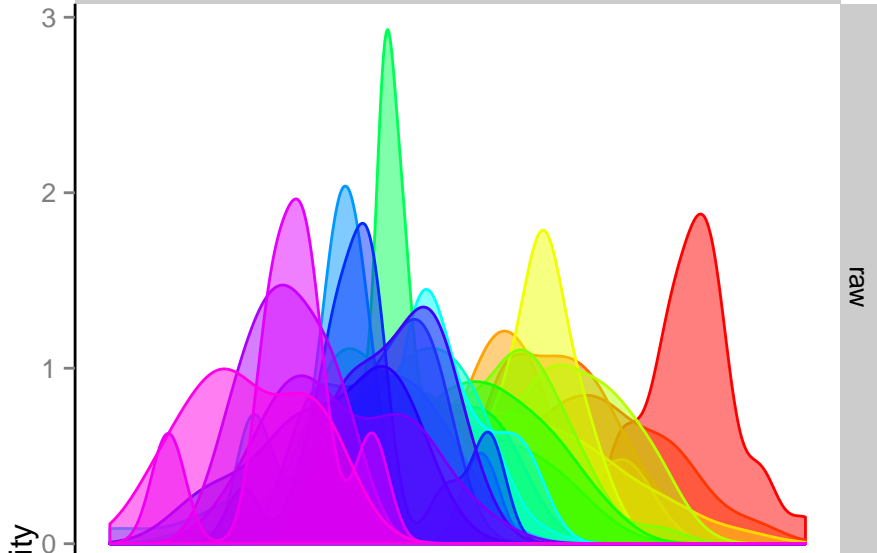

raw

PLATFORMRUNDAY\_miss

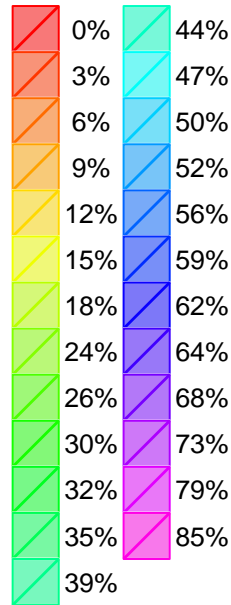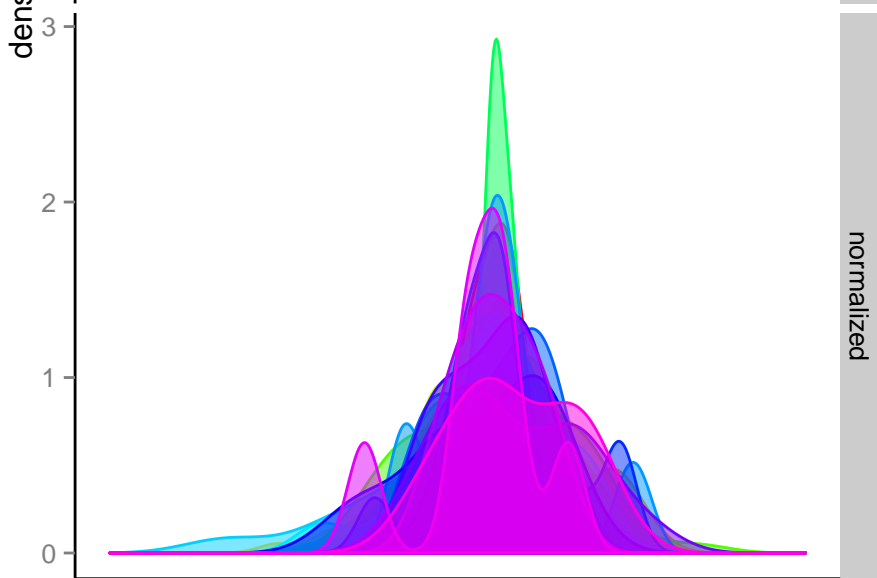

normalized

log(ion counts)

# X-10810

runday

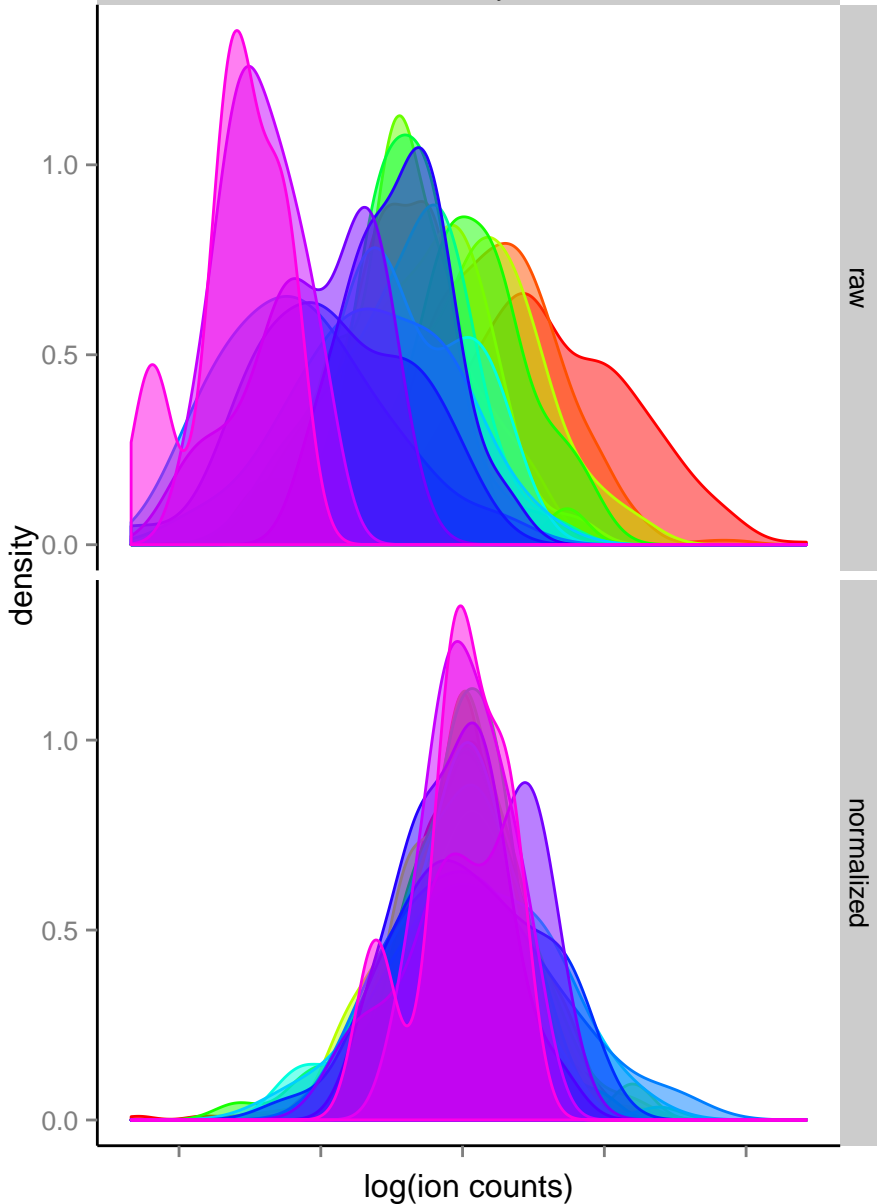

## PLATFORMRUNDAY\_miss

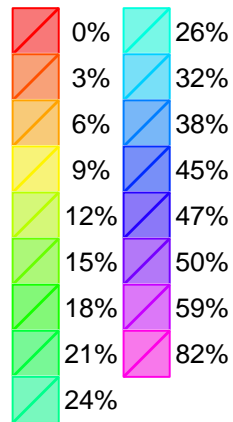

# X-11204

runday

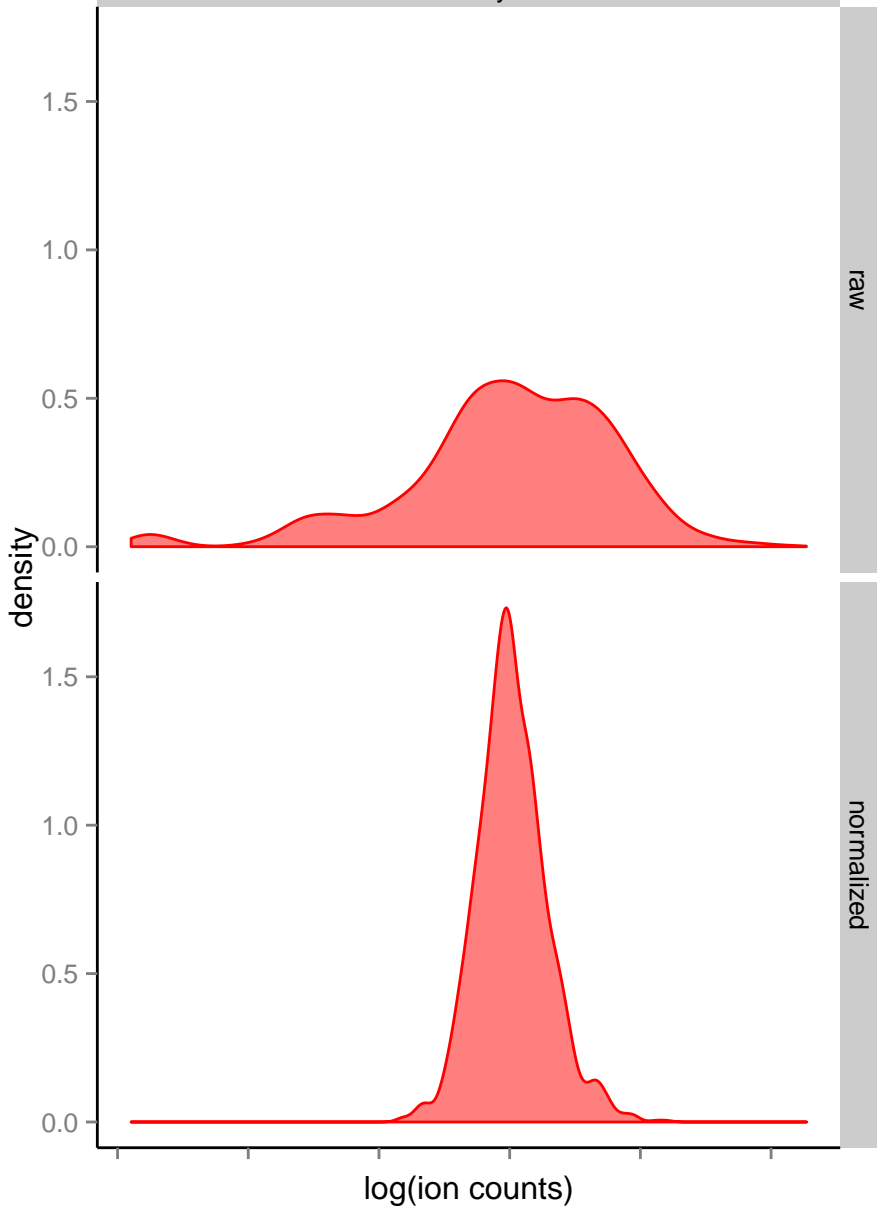

raw

normalized

**PLATFORMRUNDAY\_miss**

0%

# 4-androsten-3beta,17beta-diol disulfate 1\*

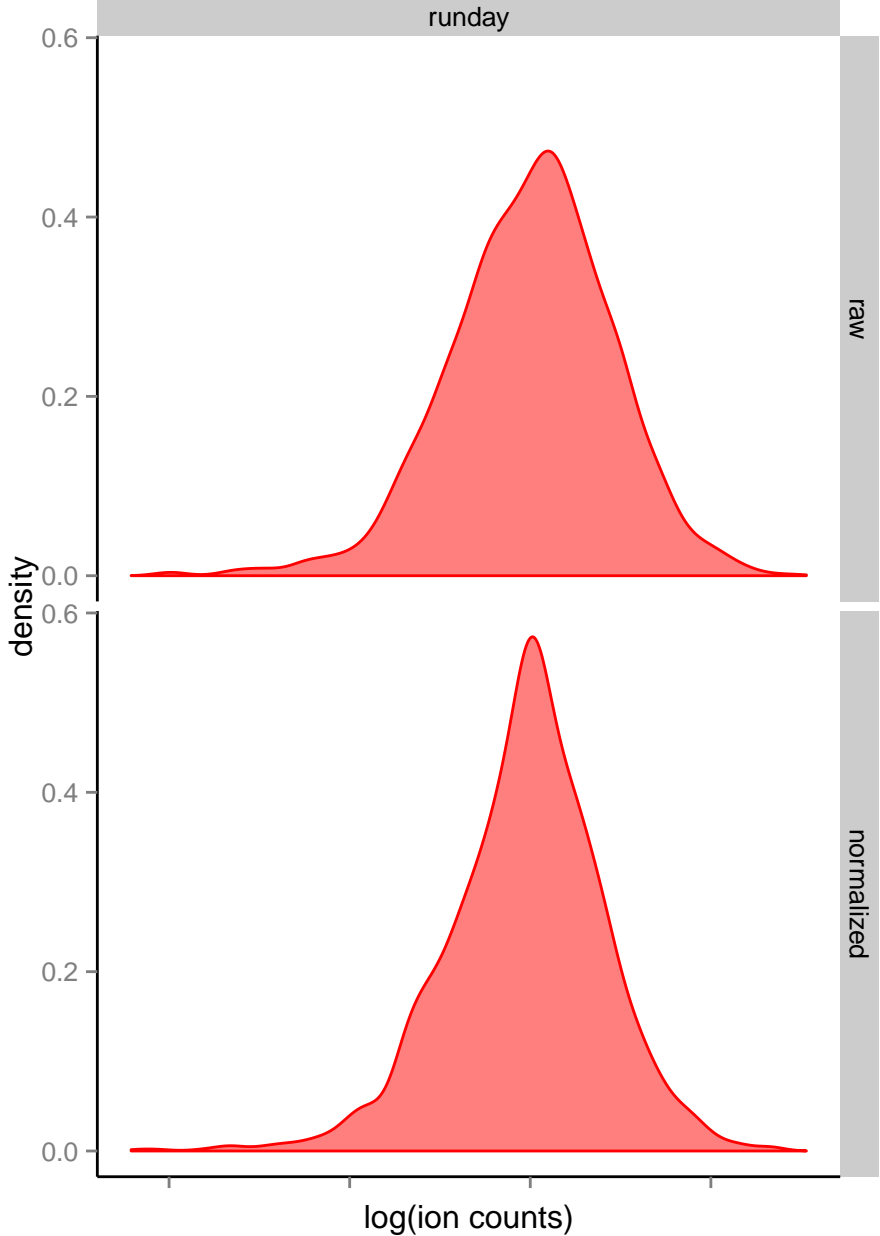

**PLATFORMRUNDAY\_miss**  
0%



# X-11247

runday

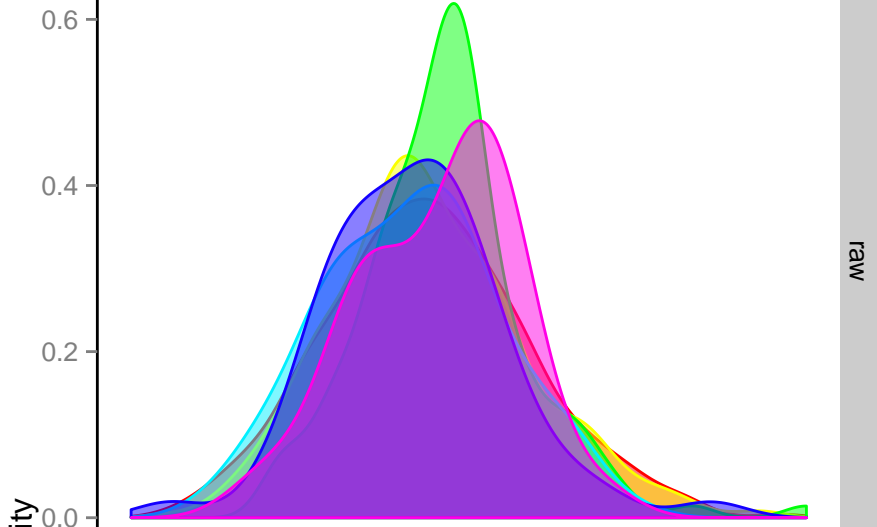

raw

## PLATFORMRUNDAY\_miss

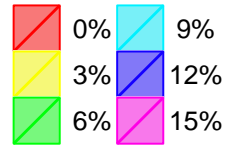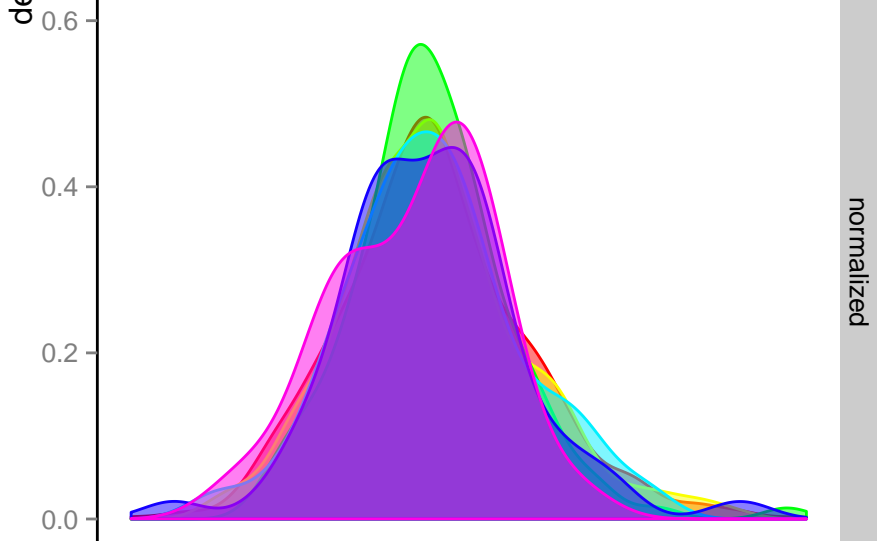

normalized

log(ion counts)

# tryptophan betaine

runday

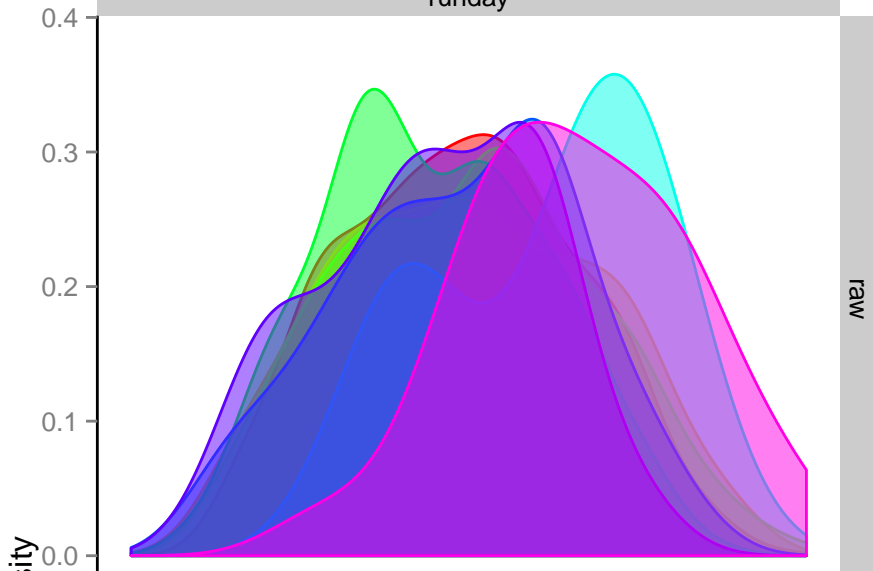

raw

## PLATFORMRUNDAY\_miss

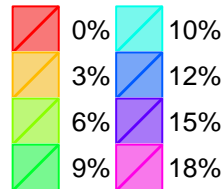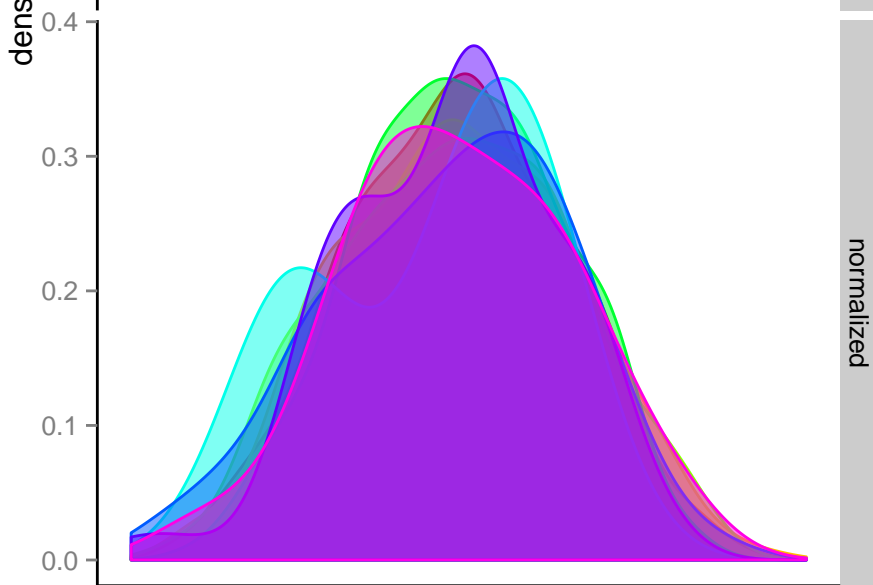

normalized

log(ion counts)

# X-11261

runday

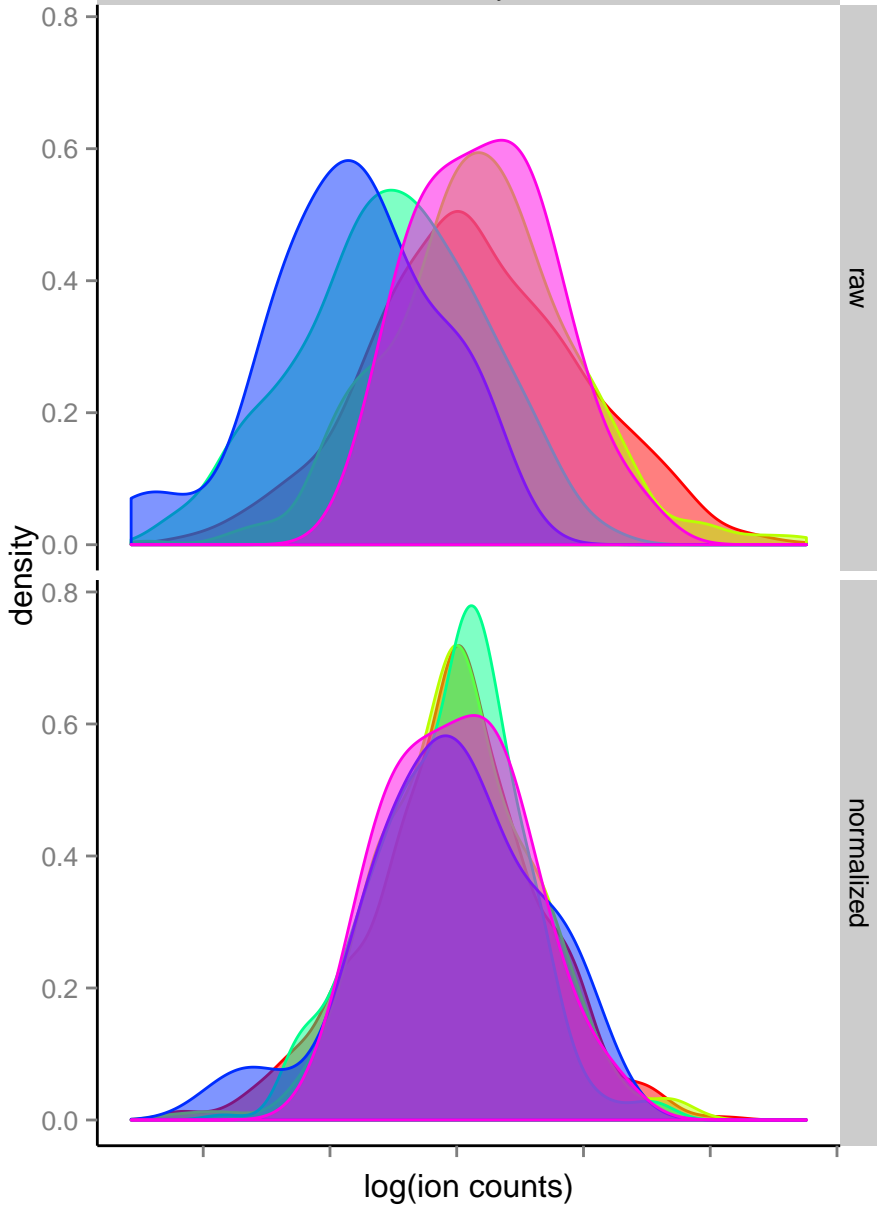

## PLATFORMRUNDAY\_miss

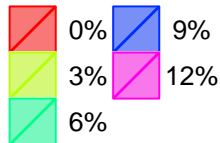

# X-11299

runday

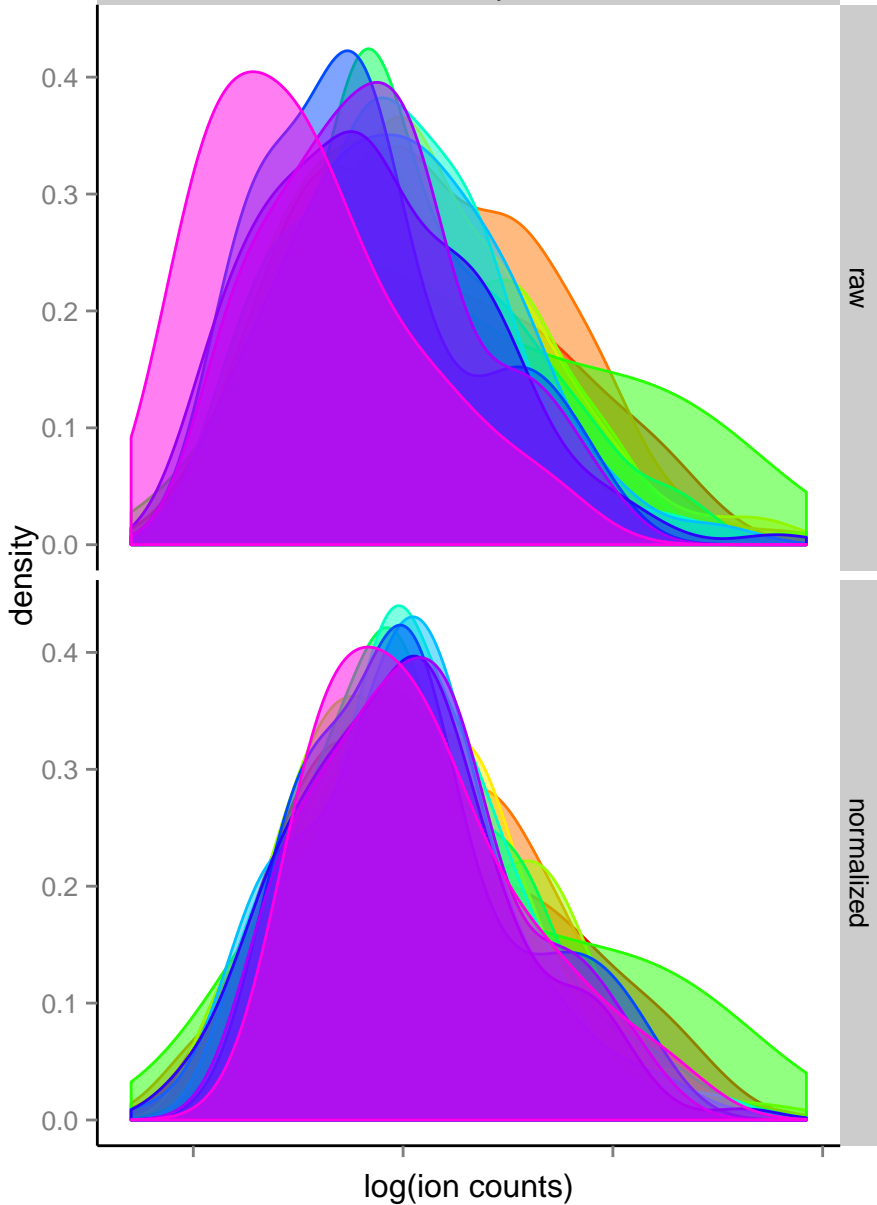

## PLATFORMRUNDAY\_miss

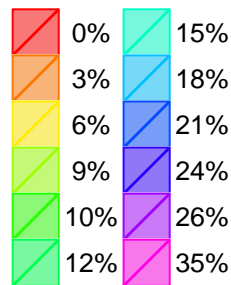

# X-11315

runday

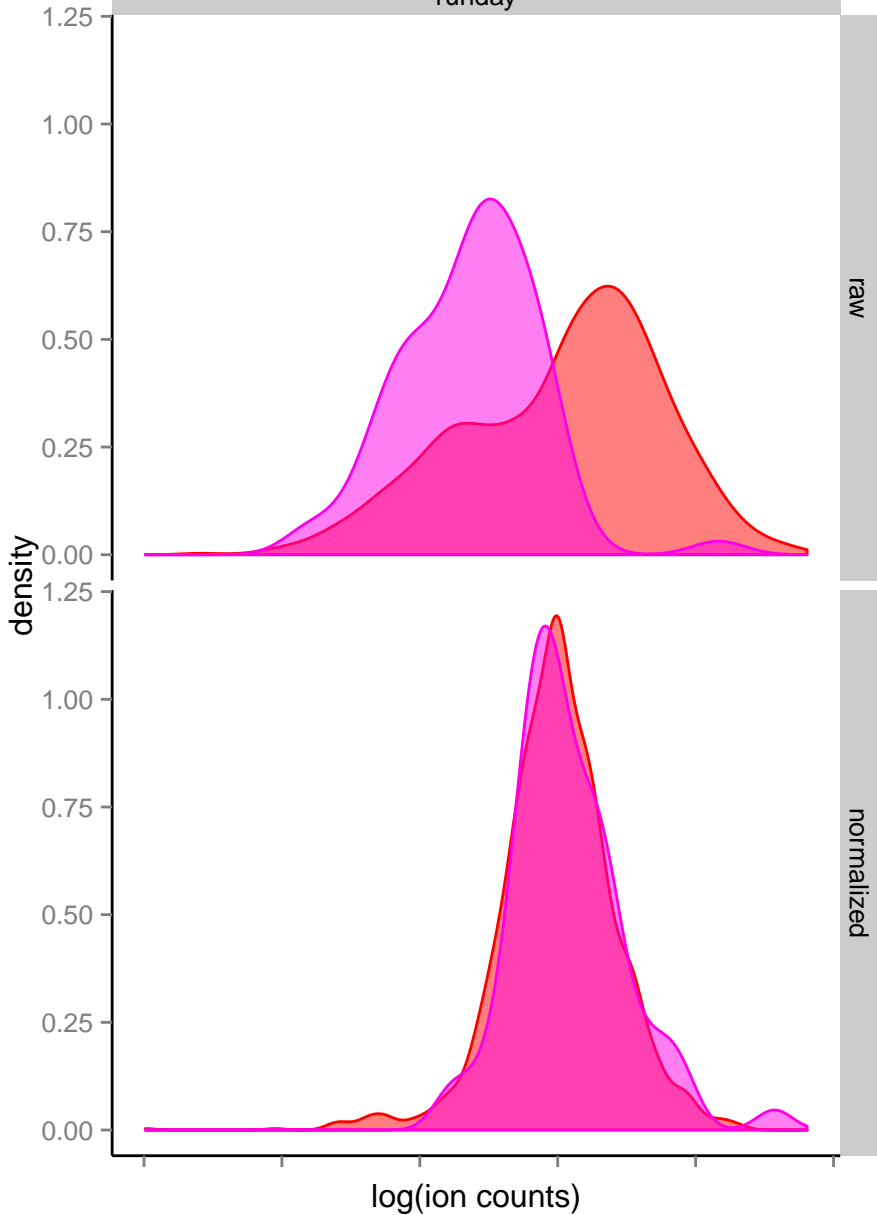

raw

normalized

**PLATFORMRUNDAY\_miss**

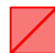

0%



3%

# X-11317

runday

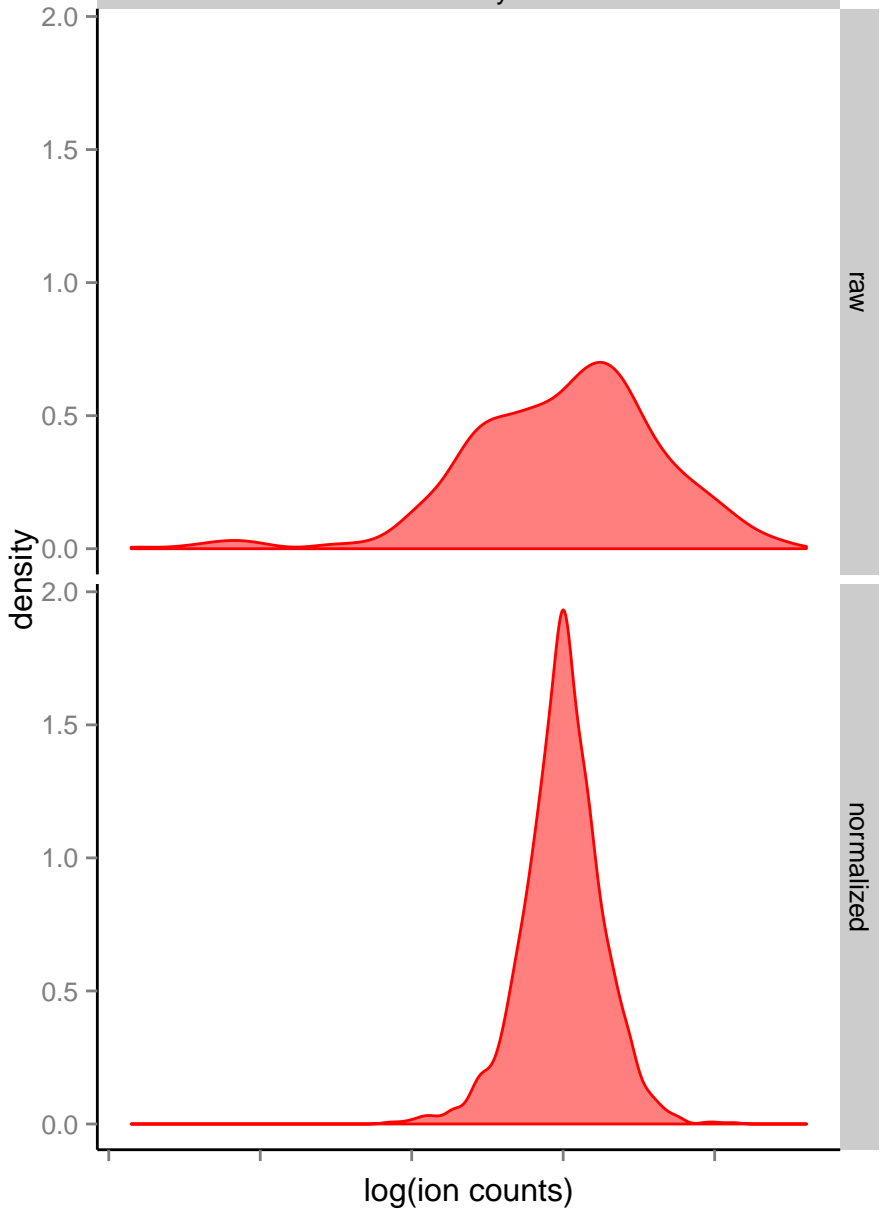

raw

normalized

**PLATFORMRUNDAY\_miss**



0%

# 15-methylpalmitate (isobar with 2-methylpalmitate)

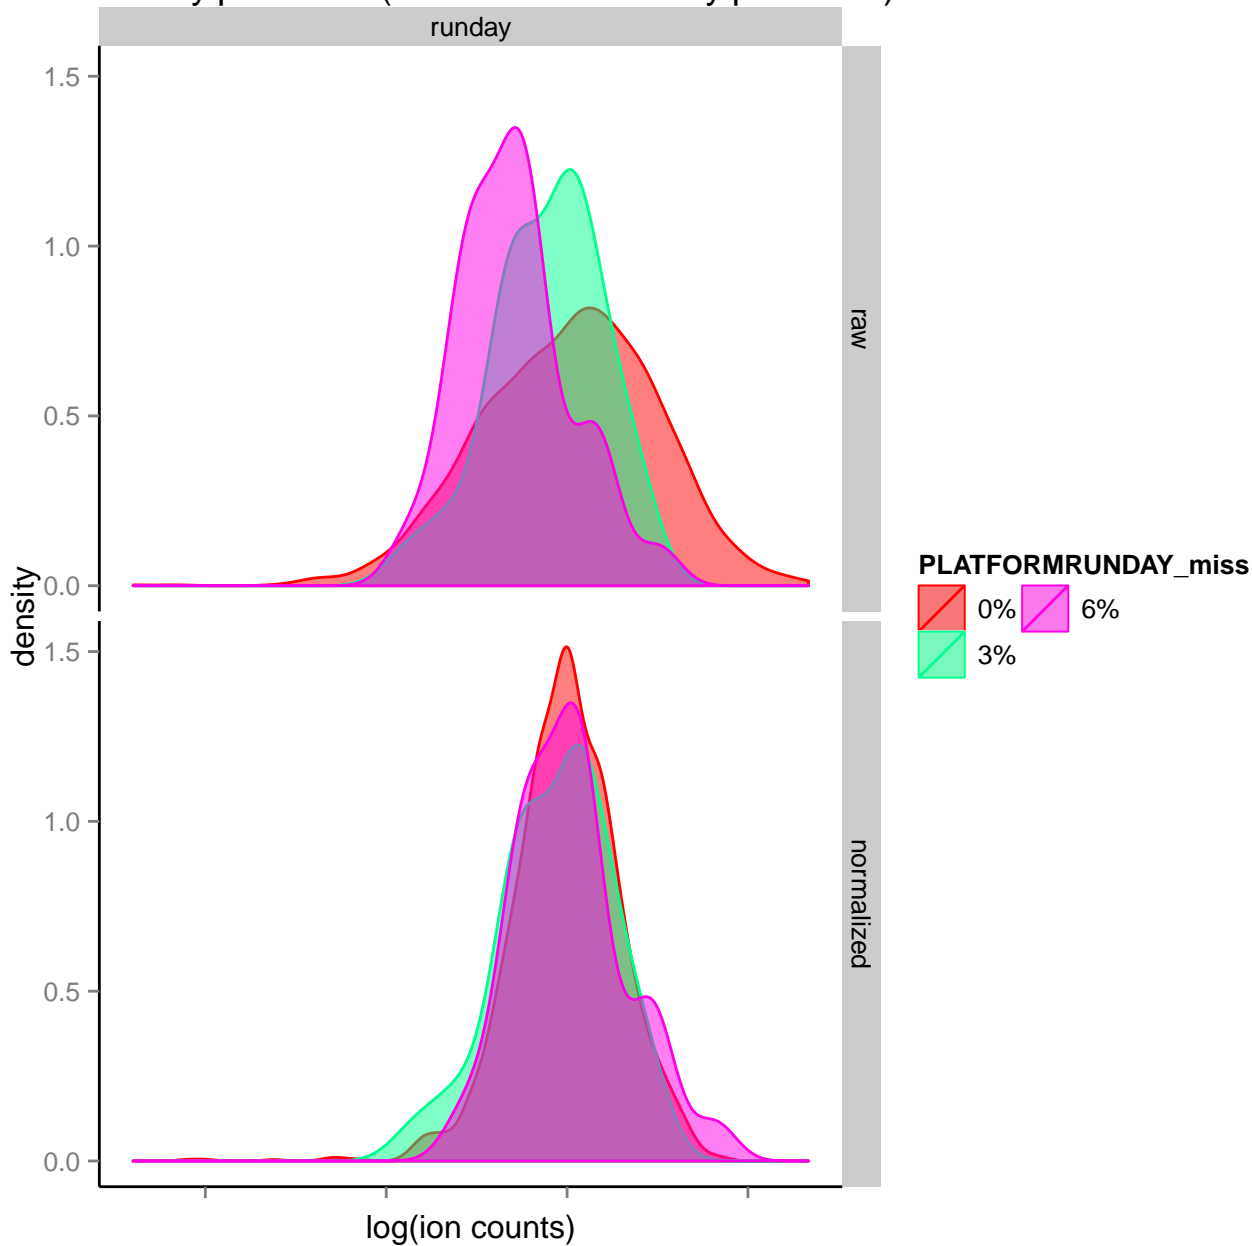

# X-11327

runday

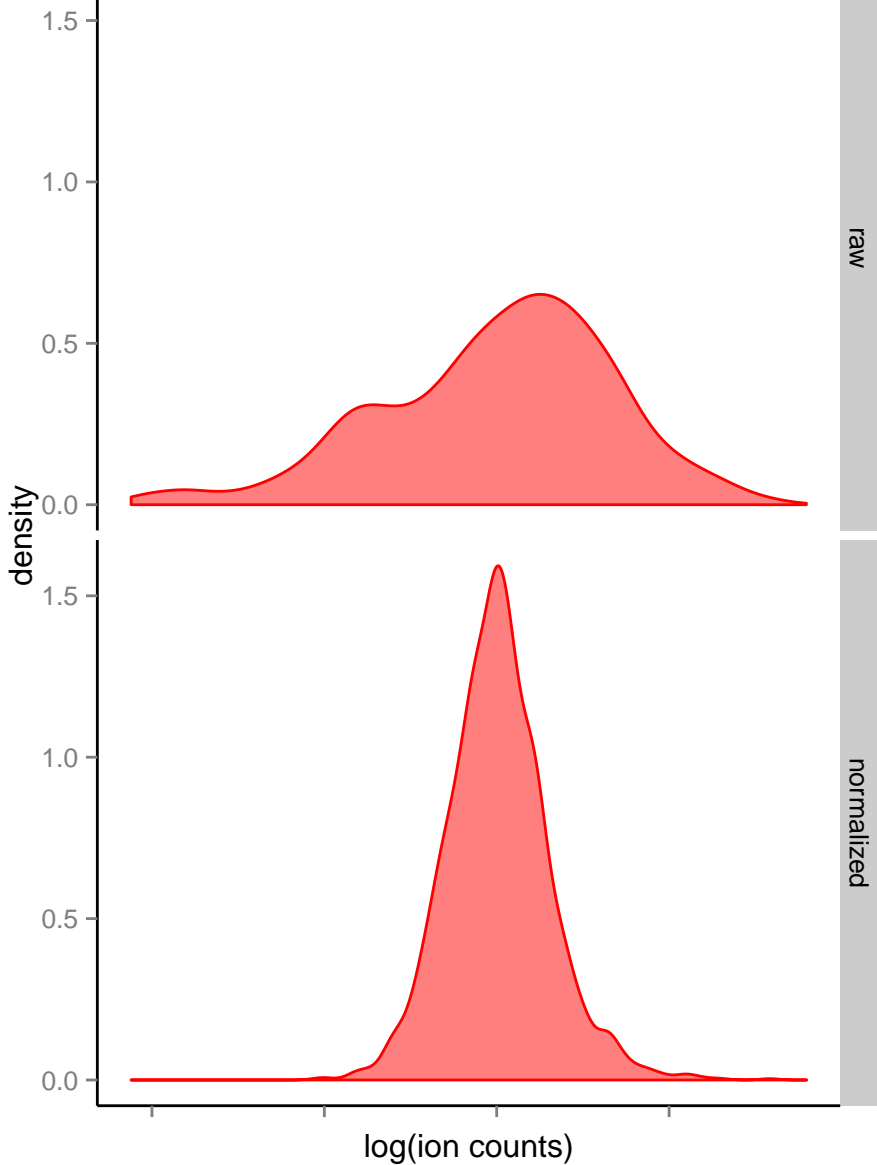

**PLATFORMRUNDAY\_miss**

0%



# X-11334

runday

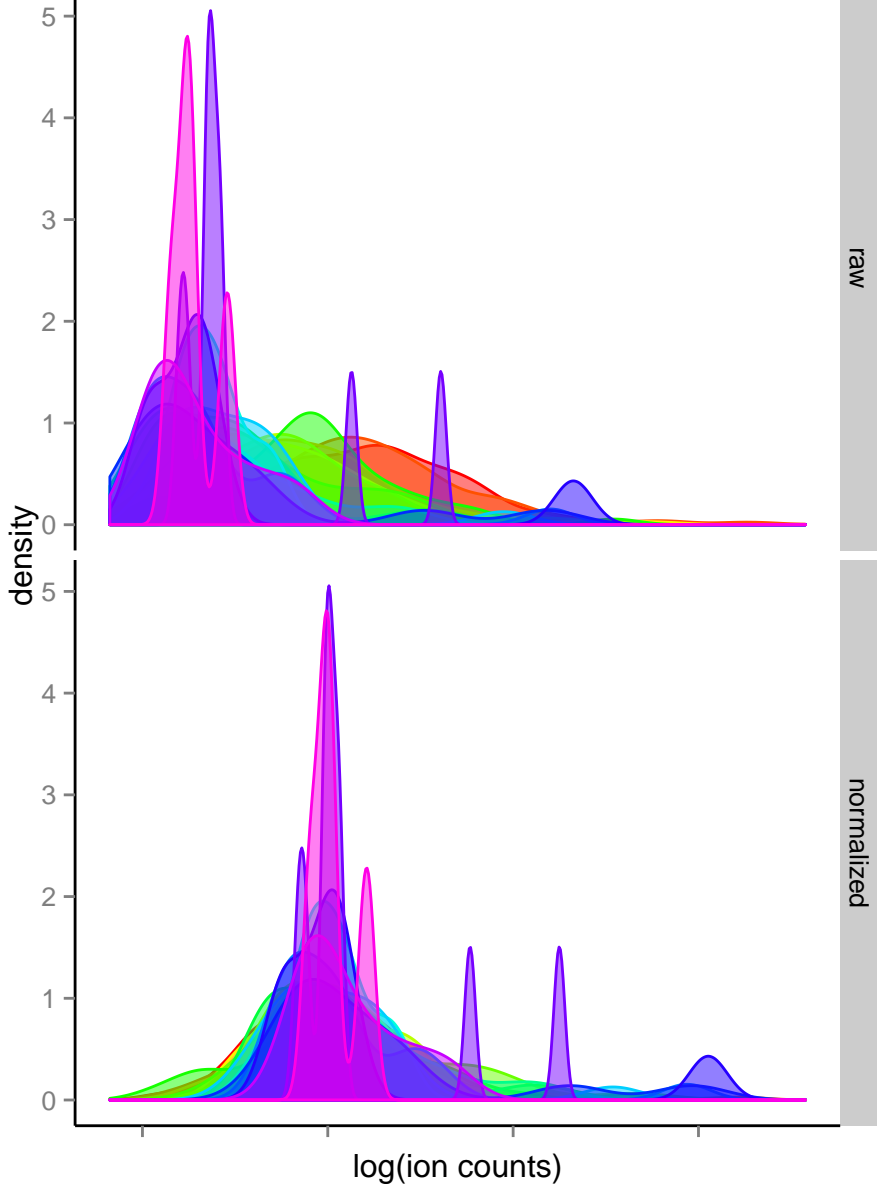

**PLATFORMRUNDAY\_miss**

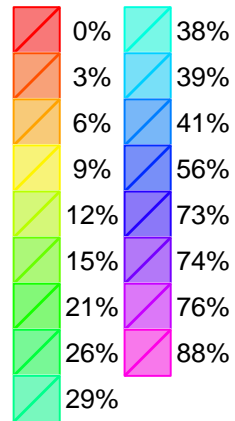

# X-11374

runday

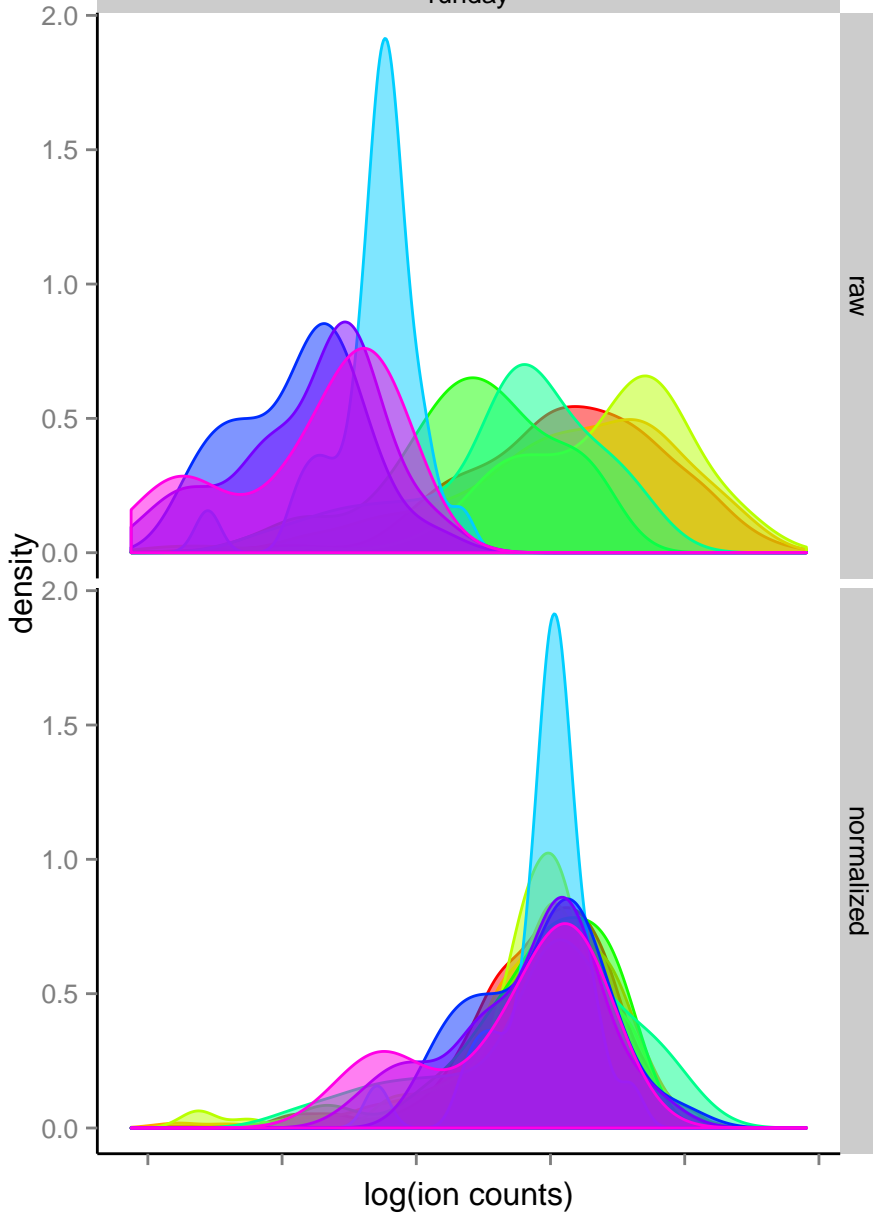

raw

normalized

## PLATFORMRUNDAY\_miss

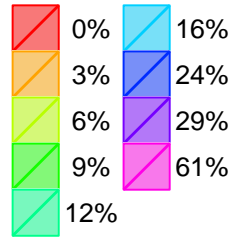

# X-11381

runday

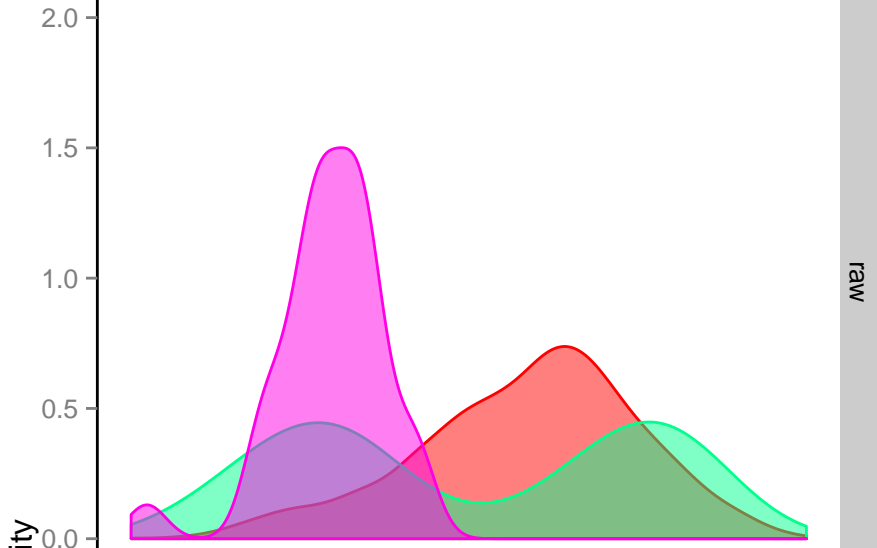

raw

**PLATFORMRUNDAY\_miss**

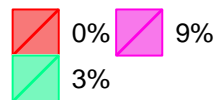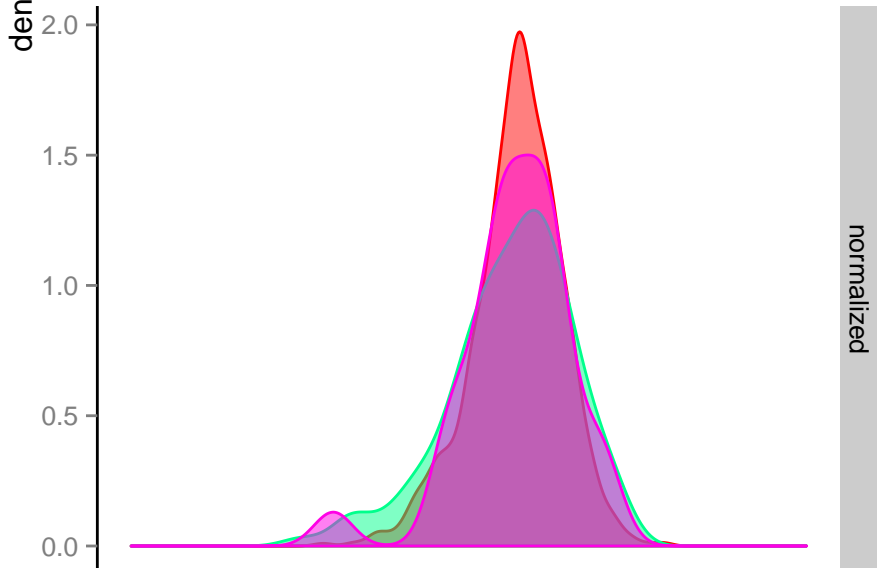

normalized

log(ion counts)

# X-11412

runday

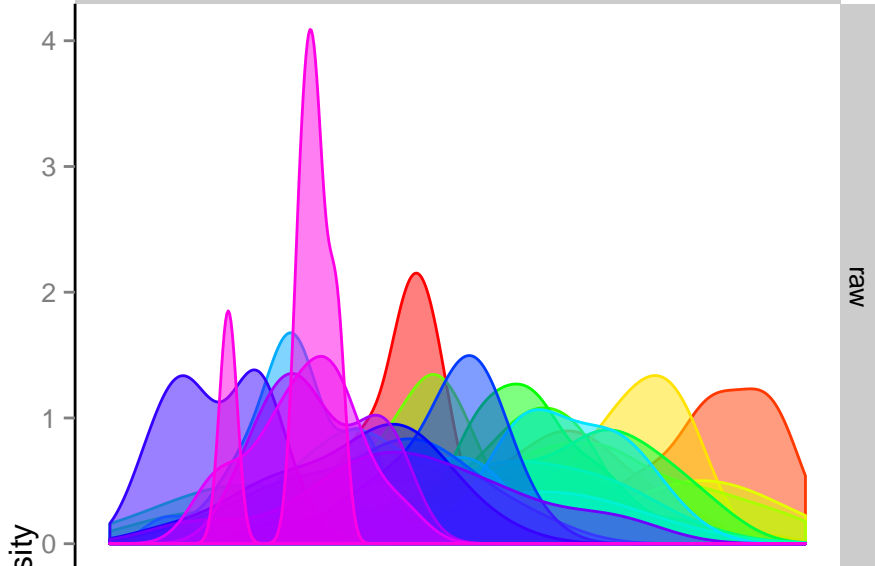

PLATFORMRUNDAY\_miss

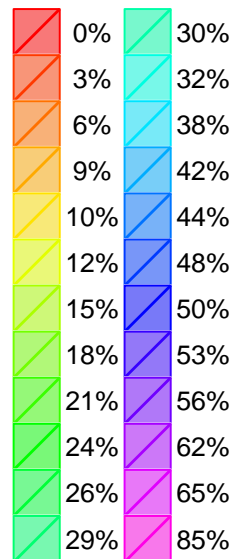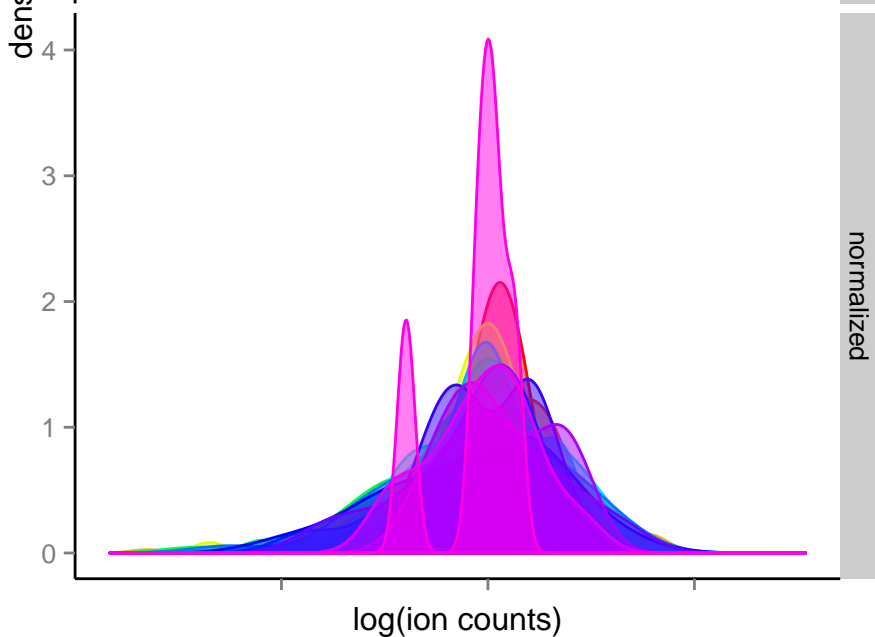

# cis-4-decenoylcarnitine

runday

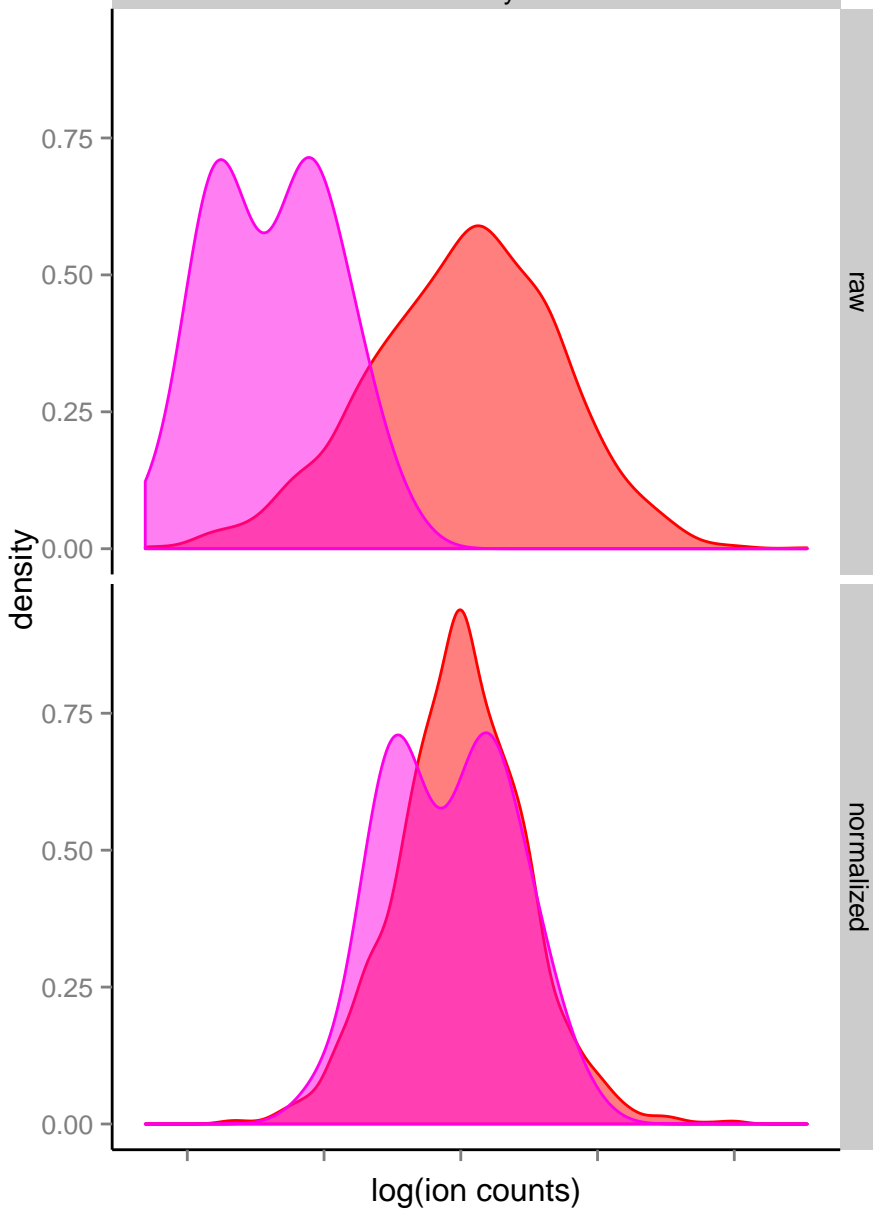

raw

normalized

**PLATFORMRUNDAY\_miss**



0%



6%

log(ion counts)

density

# xanthine

runday

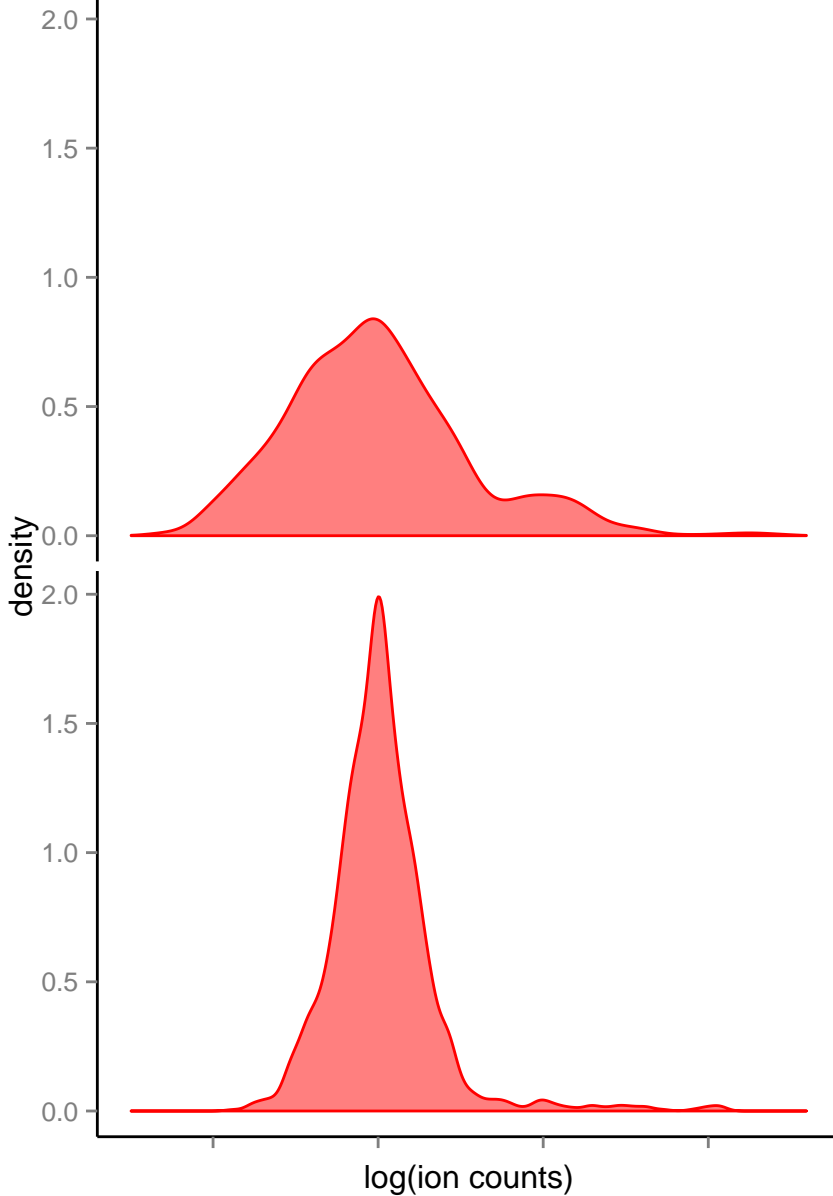

raw

normalized

**PLATFORMRUNDAY\_miss**

0%

# X-11423

runday

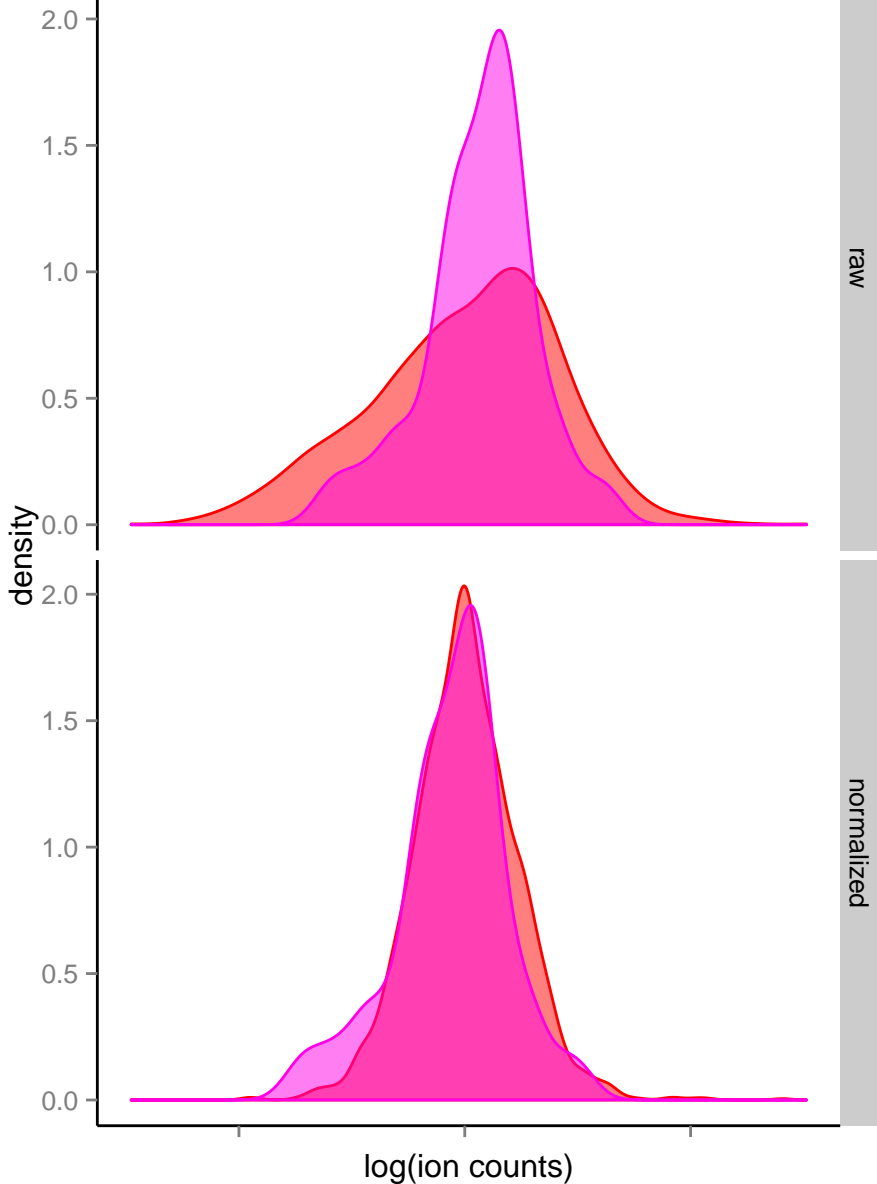

raw

normalized

**PLATFORMRUNDAY\_miss**



0%



6%

# X-11437

runday

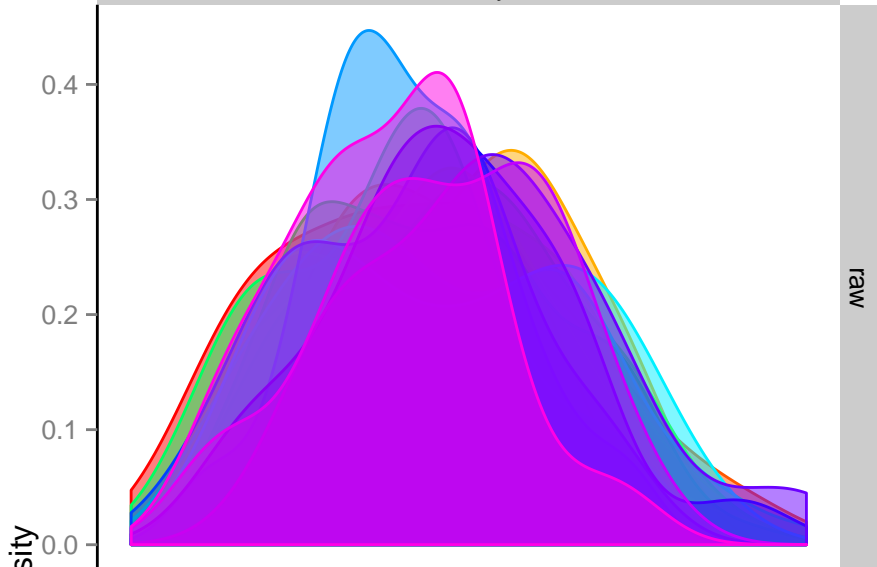

raw

## PLATFORMRUNDAY\_miss

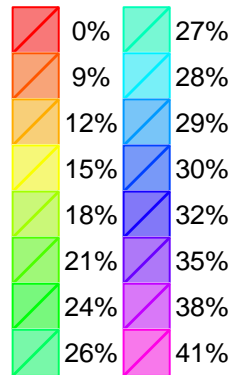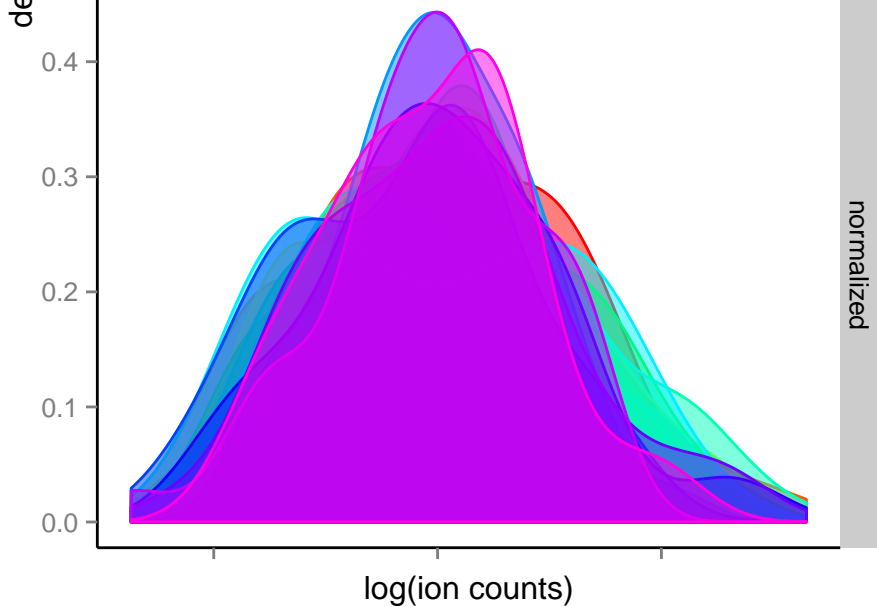

normalized



# X-11438

runday

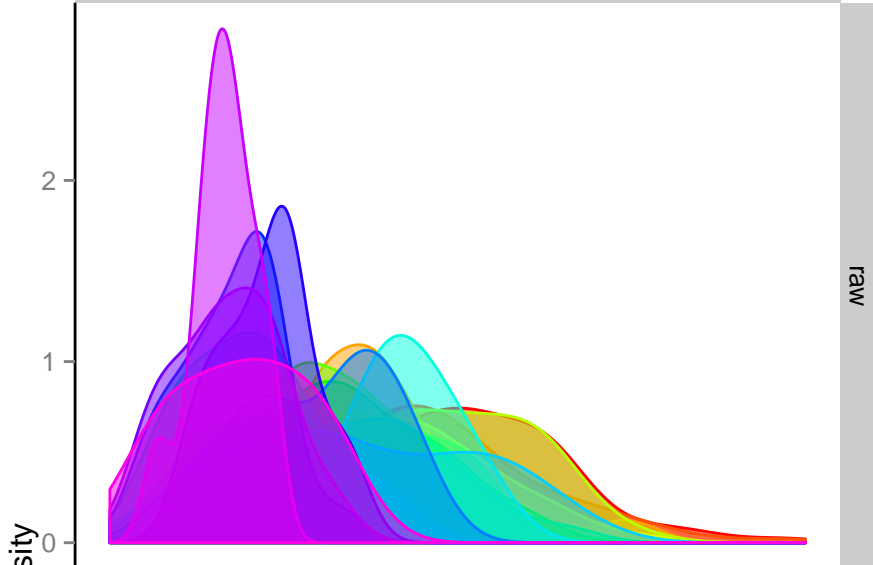

raw

**PLATFORMRUNDAY\_miss**

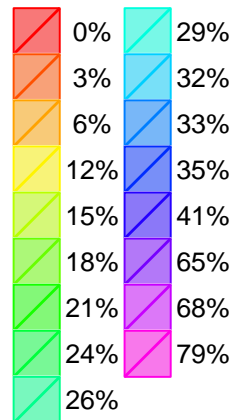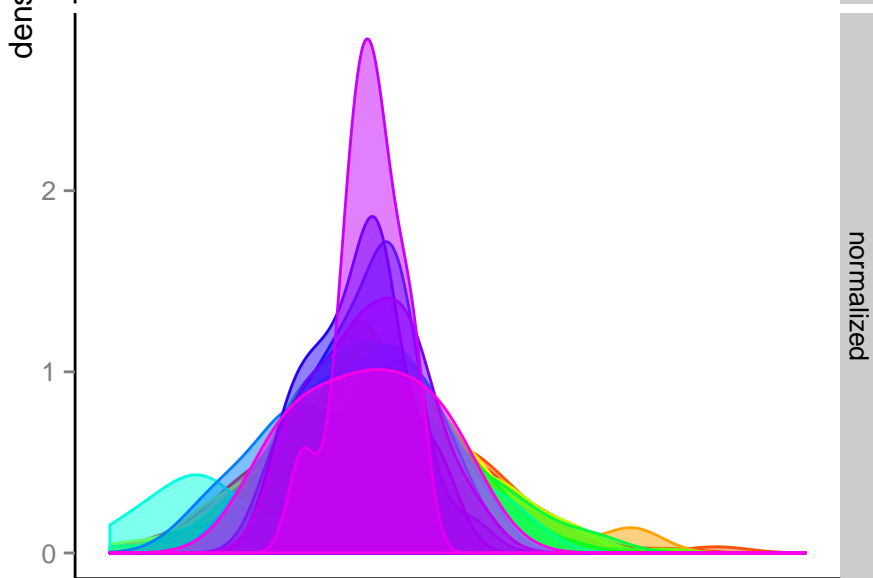

normalized

log(ion counts)

# X-11440

runday

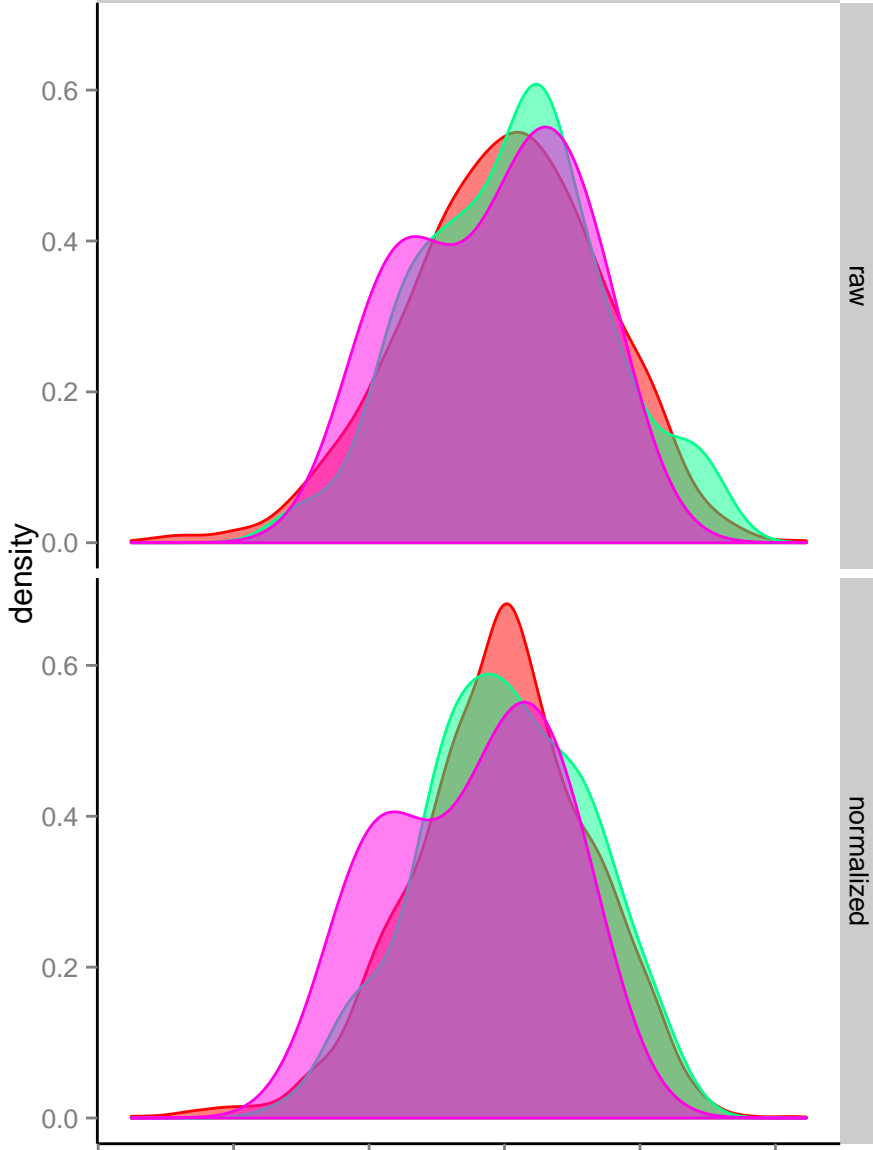

raw

normalized

**PLATFORMRUNDAY\_miss**

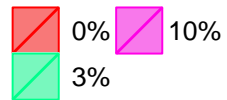

log(ion counts)

# X-11441

runday

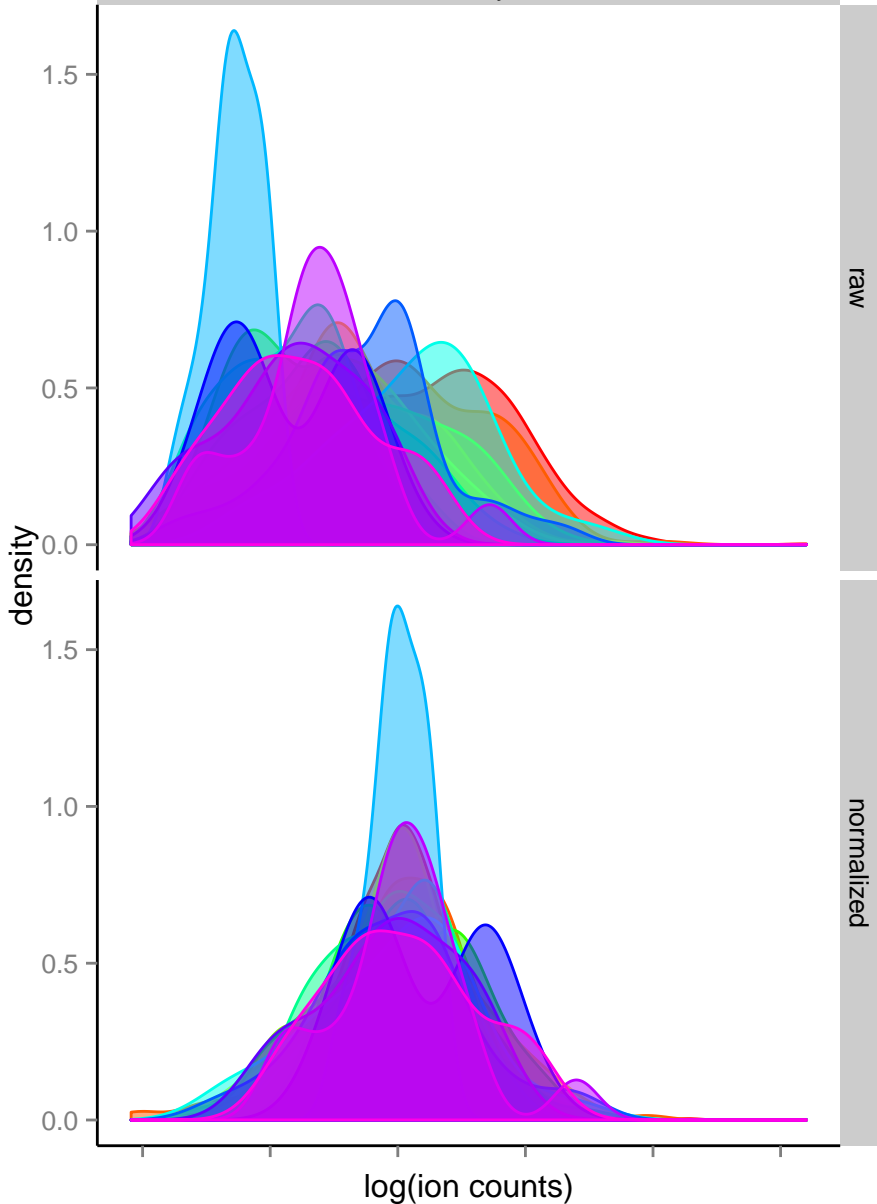

raw

normalized

## PLATFORMRUNDAY\_miss

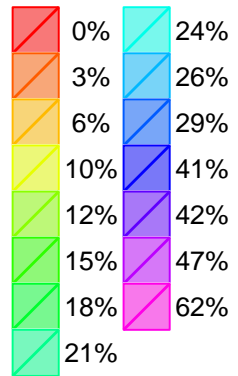

# X-11442

runday

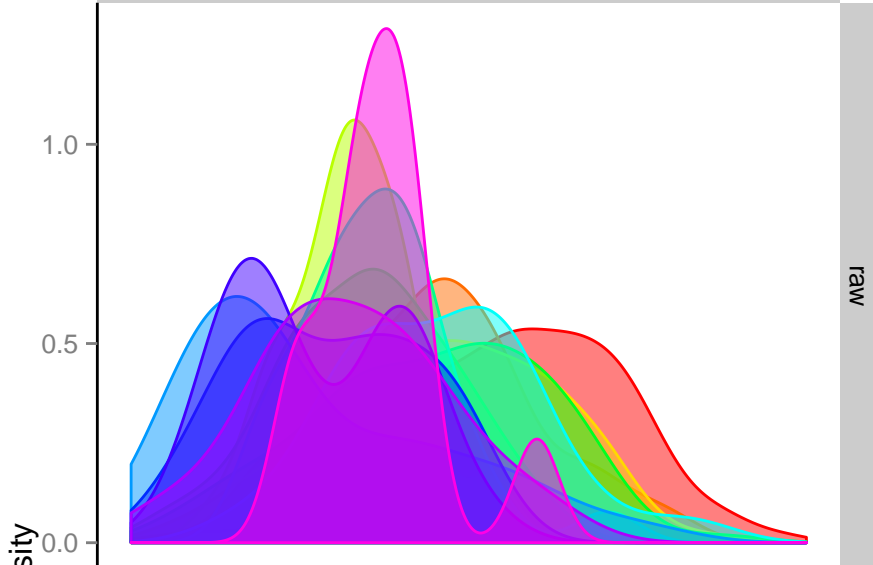

raw

## PLATFORMRUNDAY\_miss

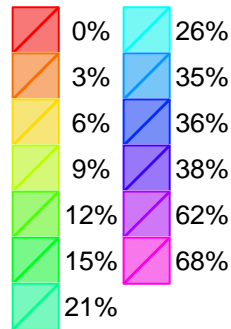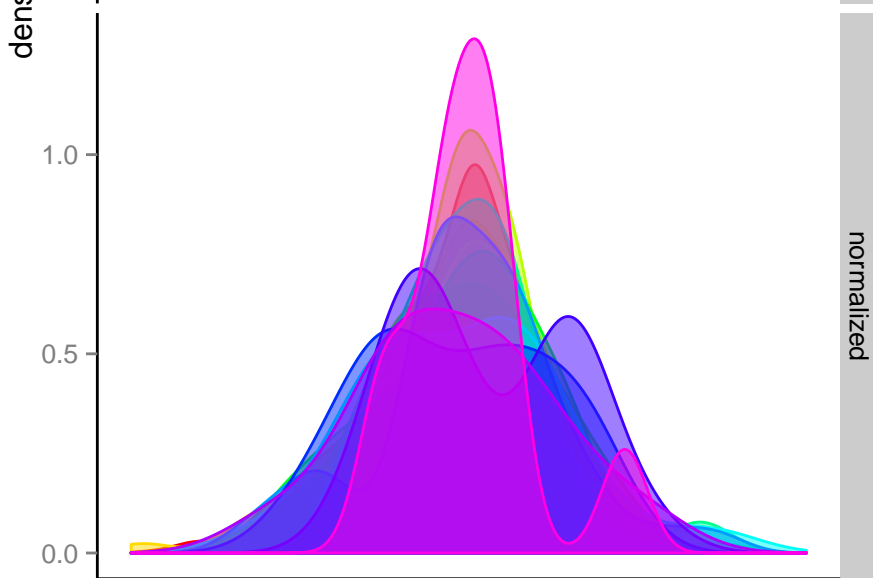

normalized

log(ion counts)

# 5alpha-androstan-3beta,17beta-diol-disulfate

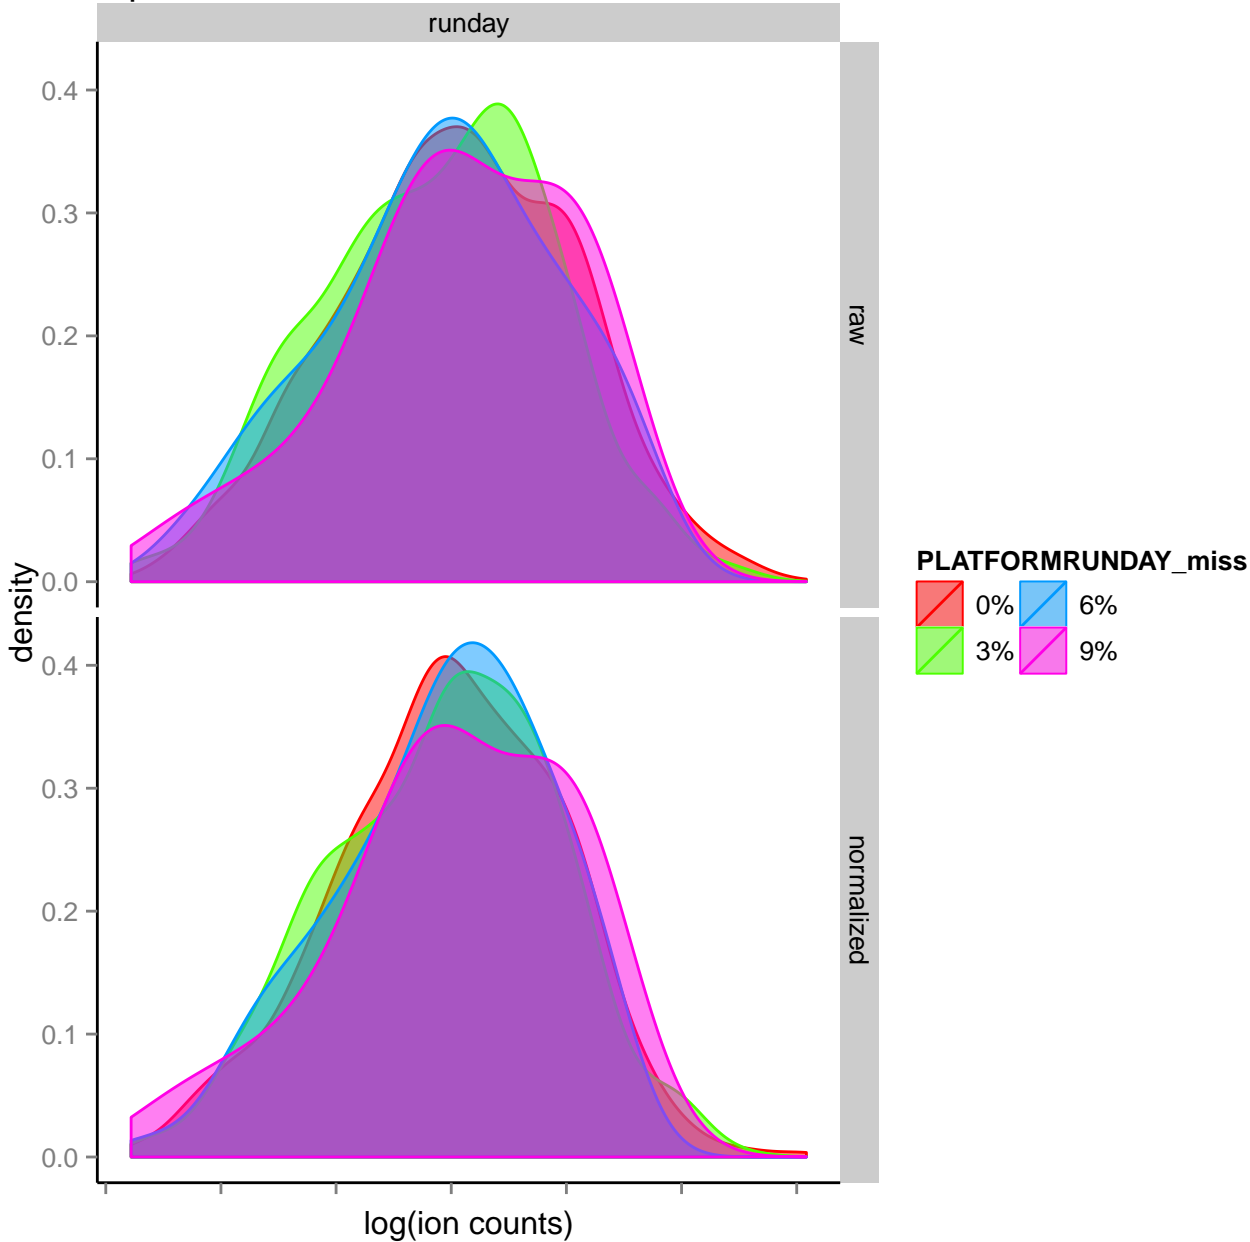

# X-11444

runday

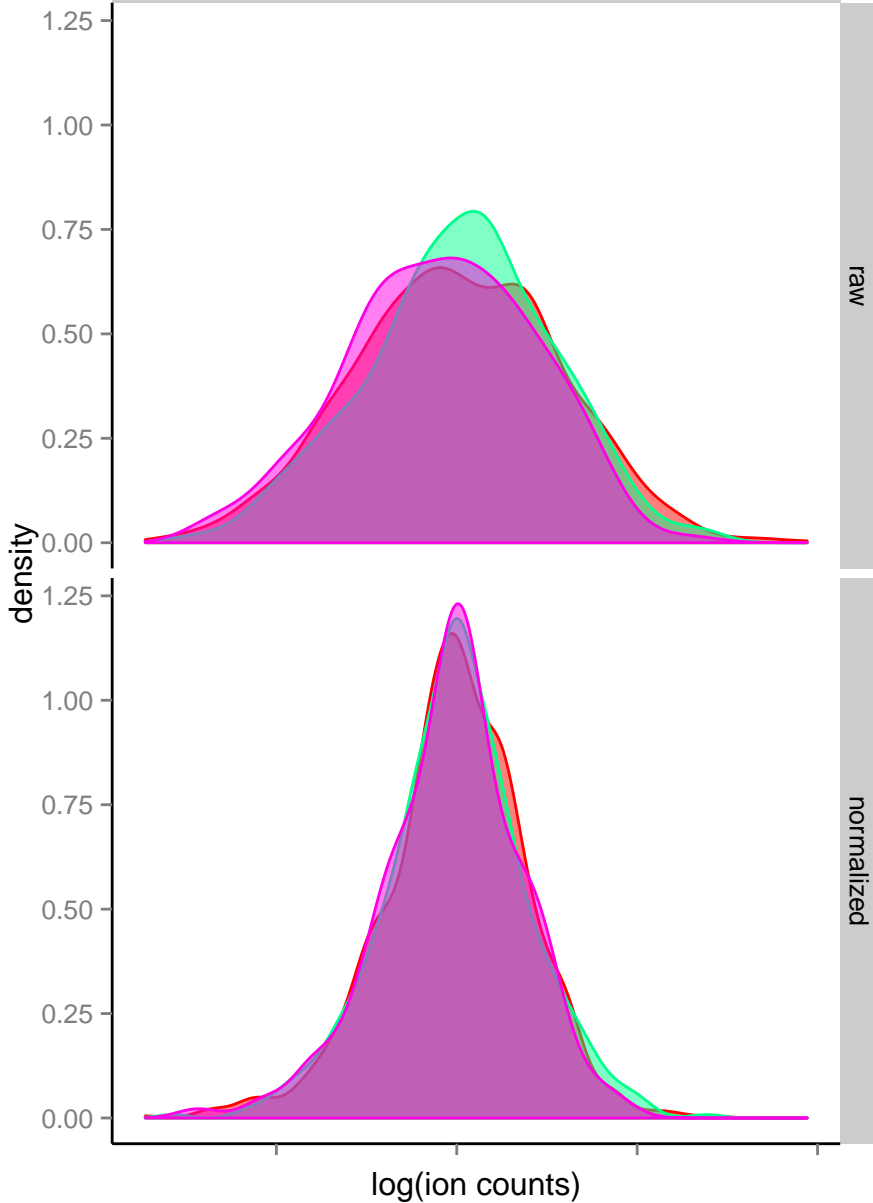

raw

normalized

**PLATFORMRUNDAY\_miss**



# 5alpha-androstan-3beta,17beta-diol disulfate

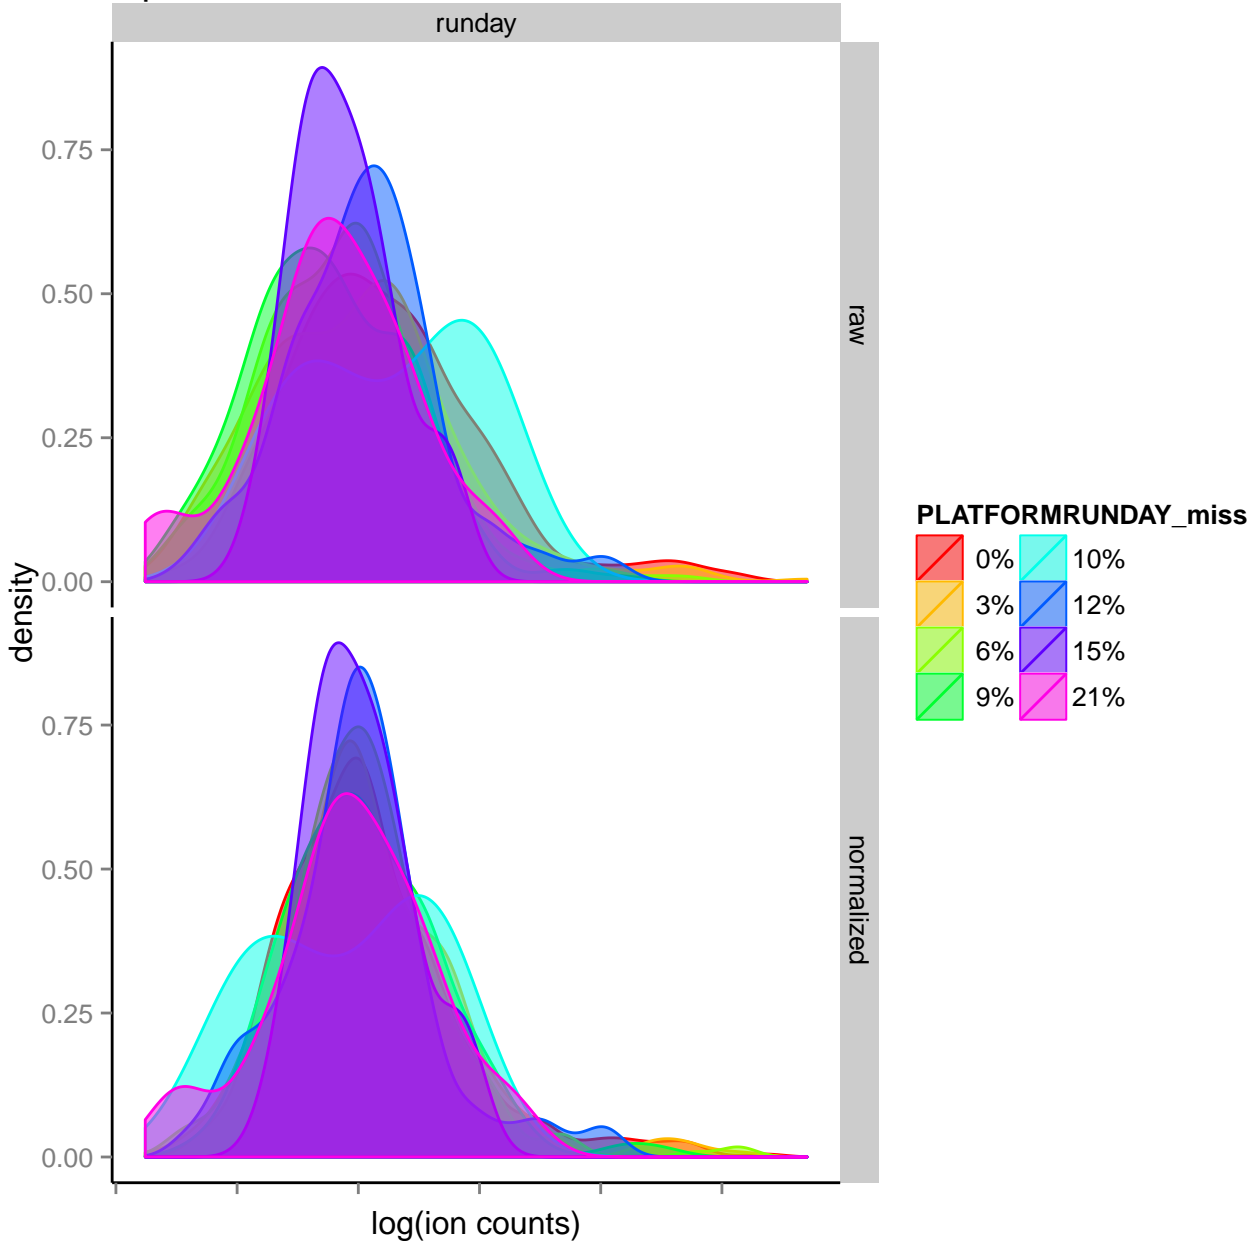

# 4-androsten-3beta,17beta-diol disulfate 2\*

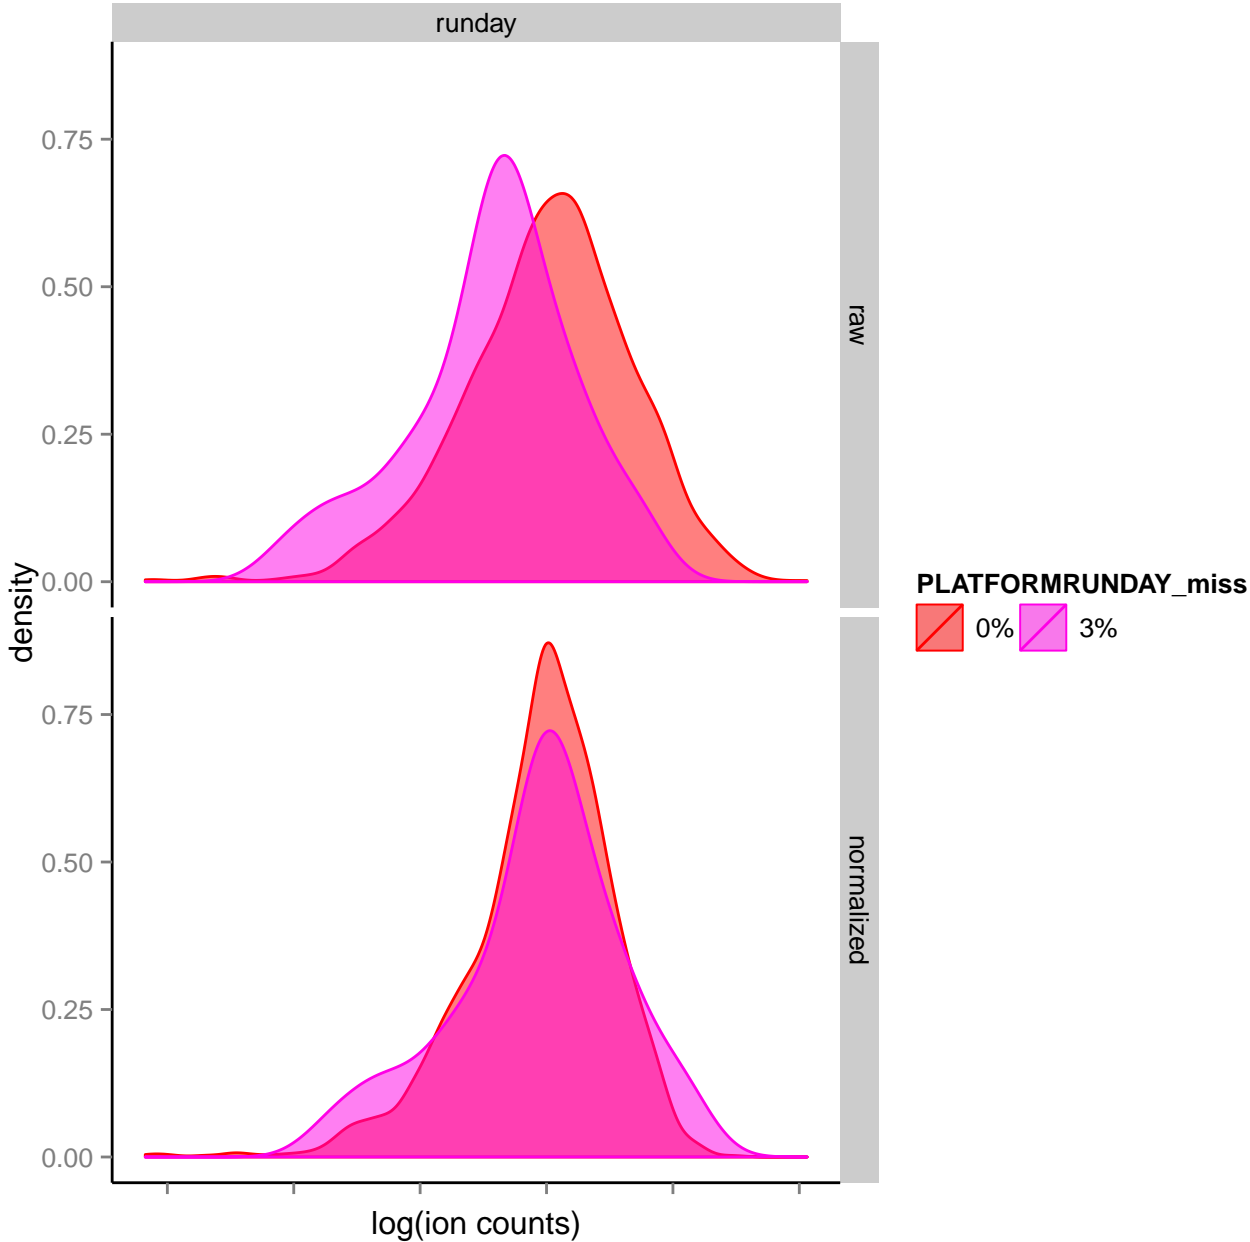



# X-11452

runday

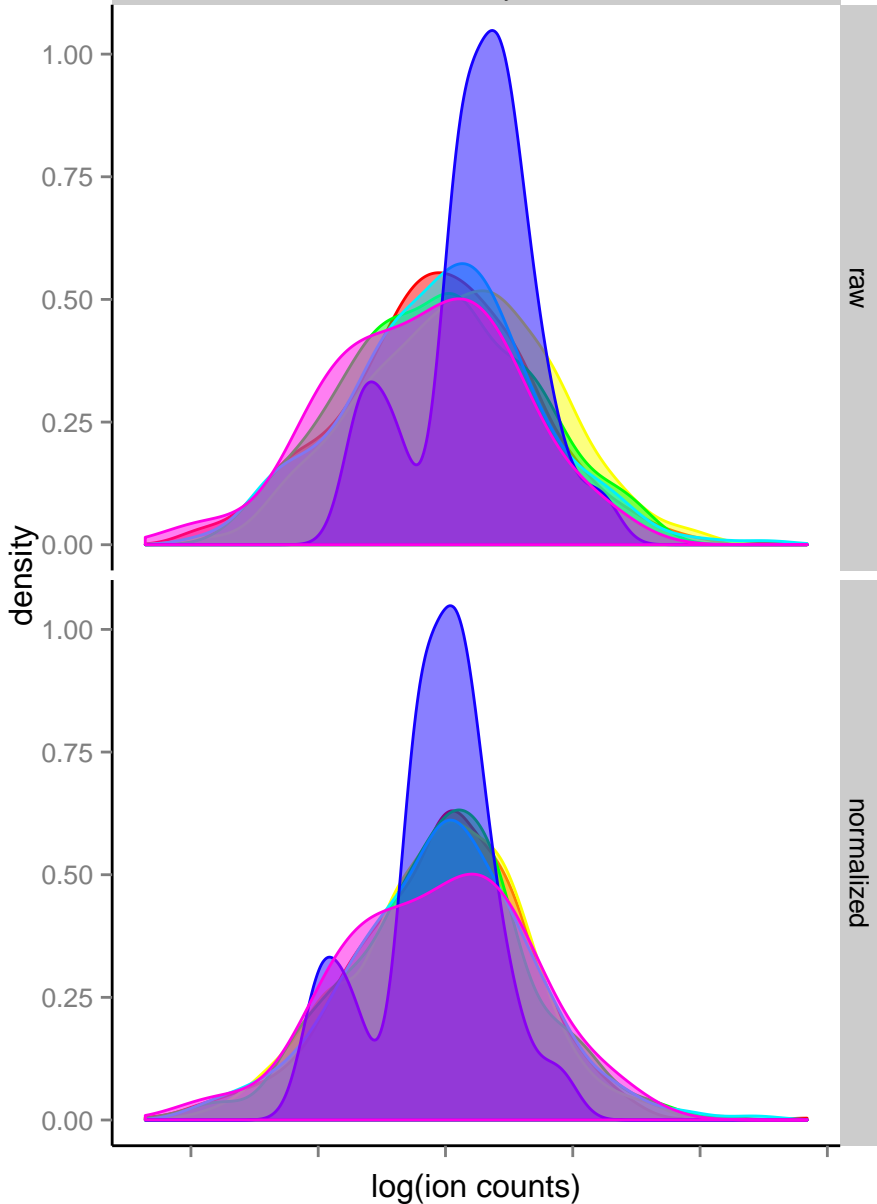

# X-11469

runday

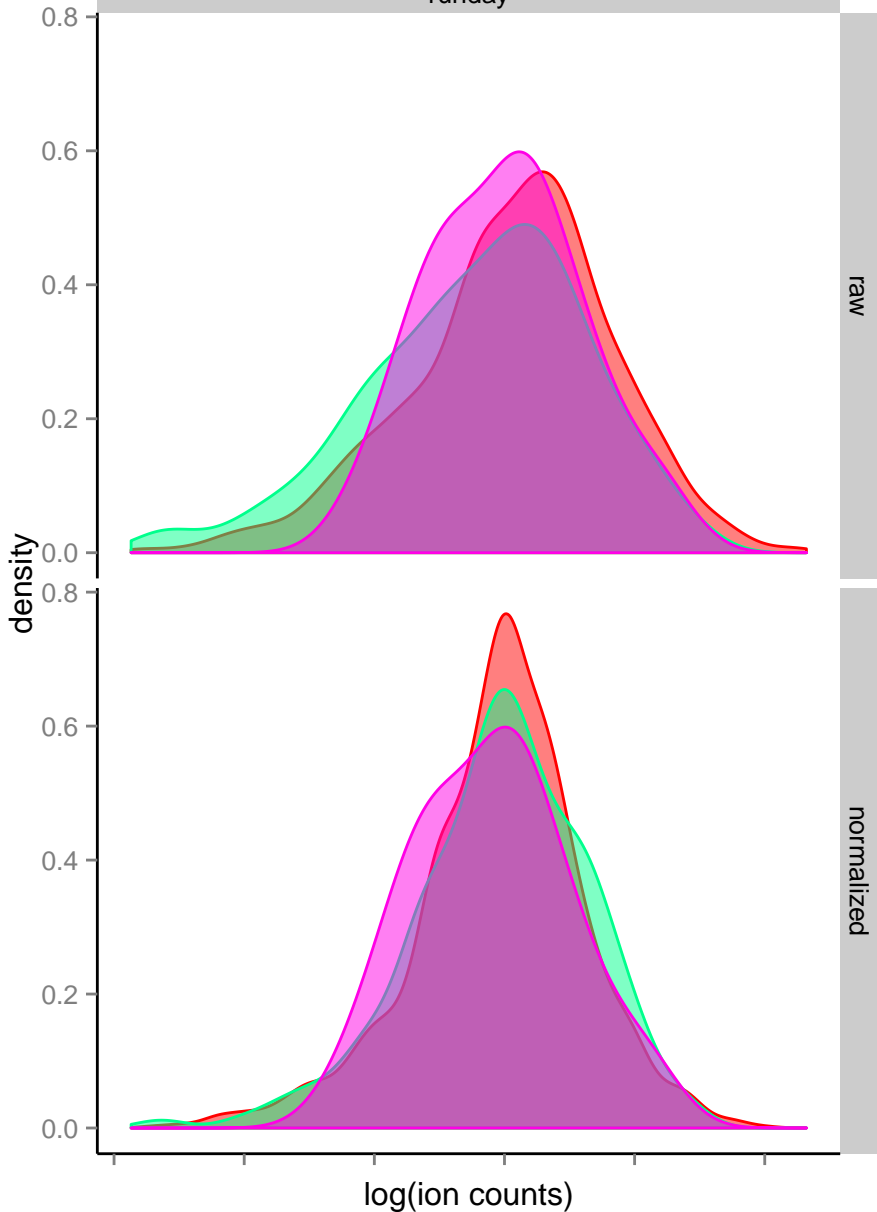

raw

normalized

**PLATFORMRUNDAY\_miss**



# X-11470

runday

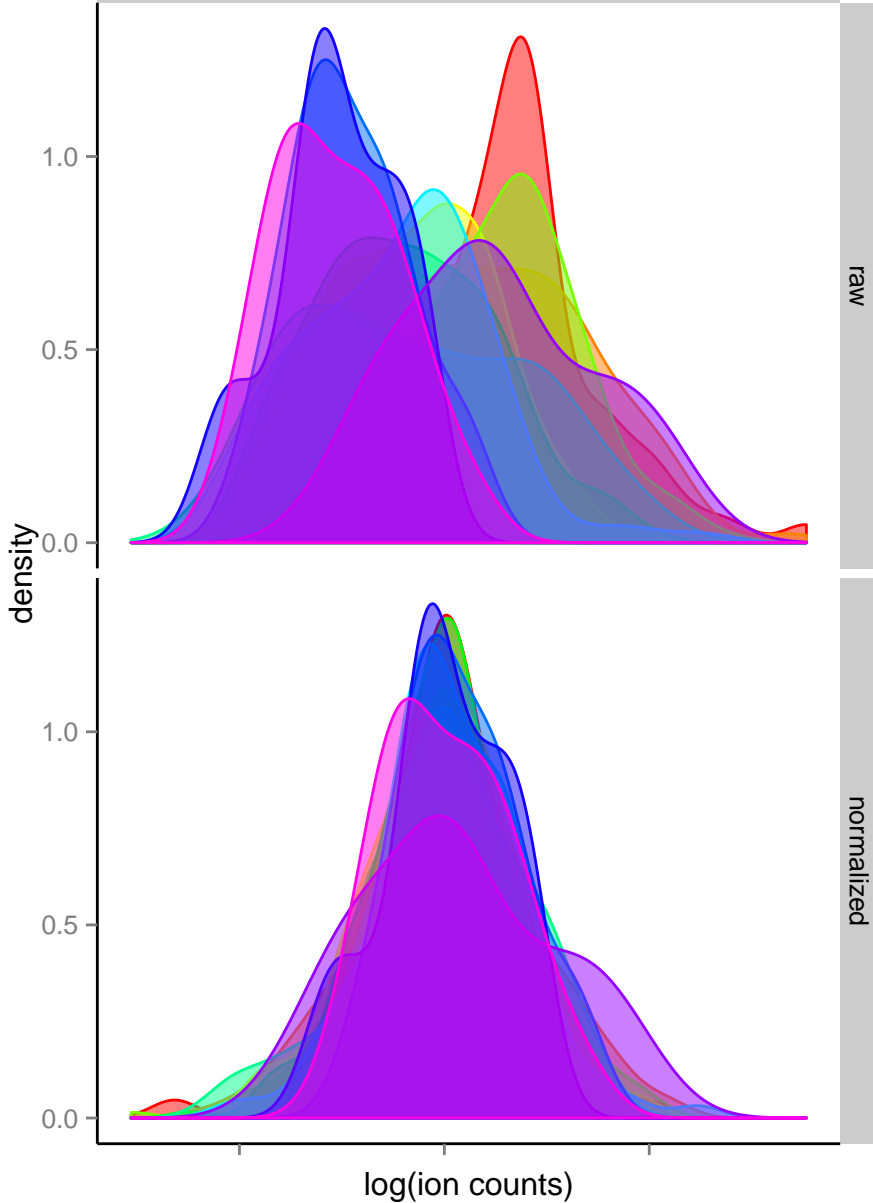

raw

normalized

## PLATFORMRUNDAY\_miss

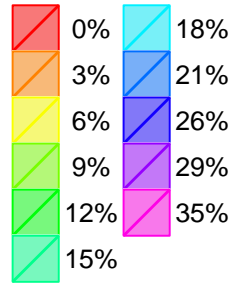

# X-11478

runday

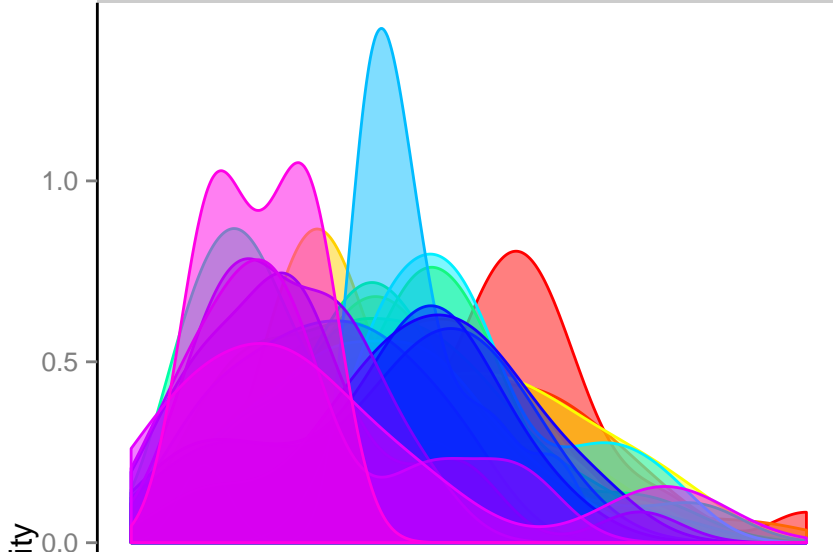

raw

## PLATFORMRUNDAY\_miss

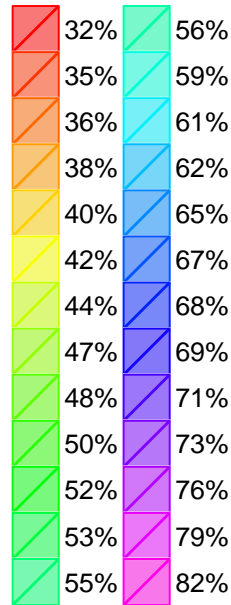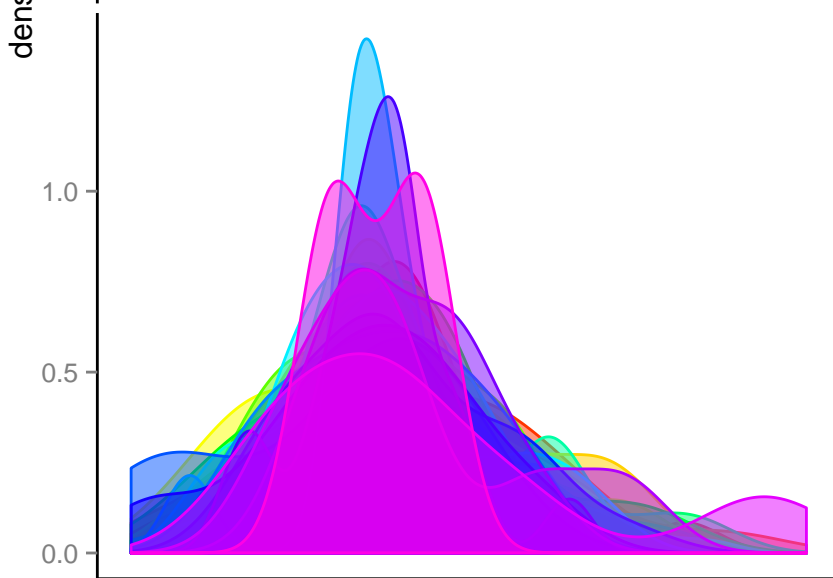

normalized

log(ion counts)

# X-11483

runday

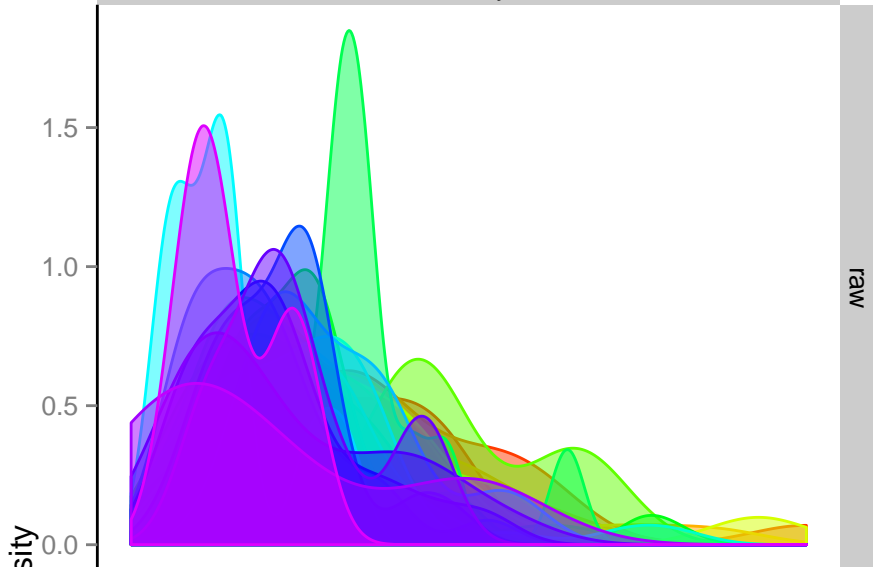

raw

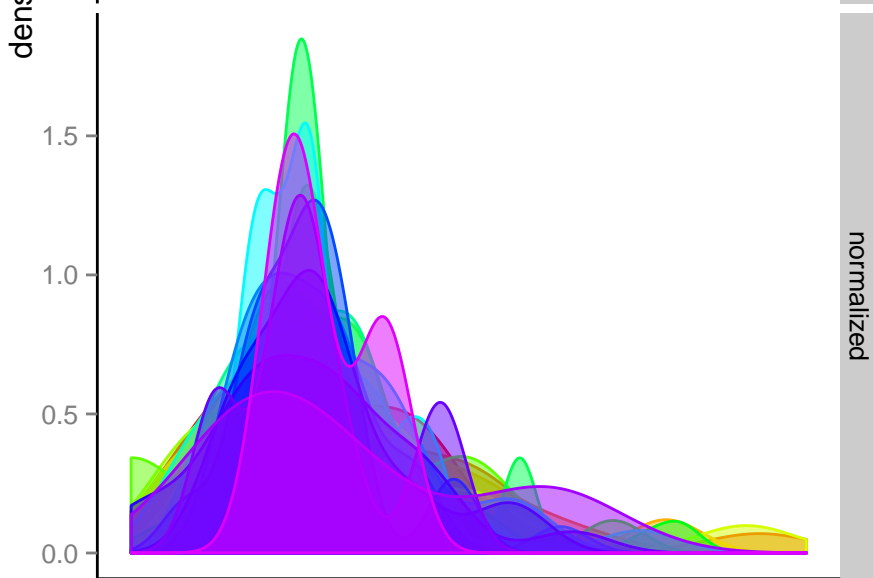

normalized

**PLATFORMRUNDAY\_miss**

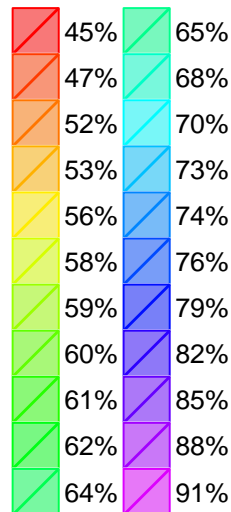

log(ion counts)

# X-11485

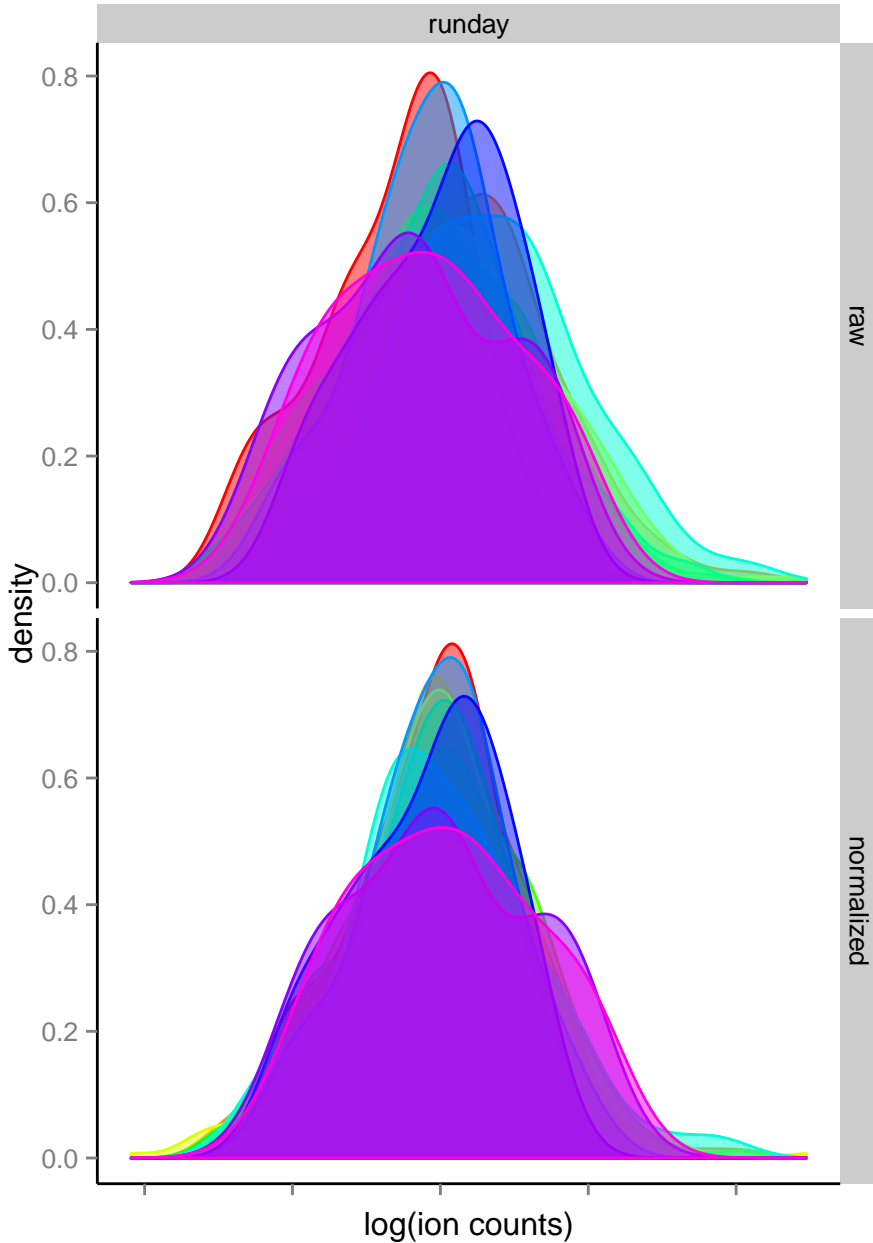

raw

normalized

## PLATFORMRUNDAY\_miss

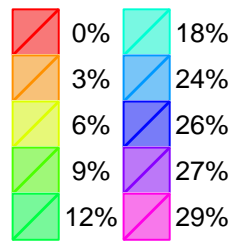

# X-11491

runday

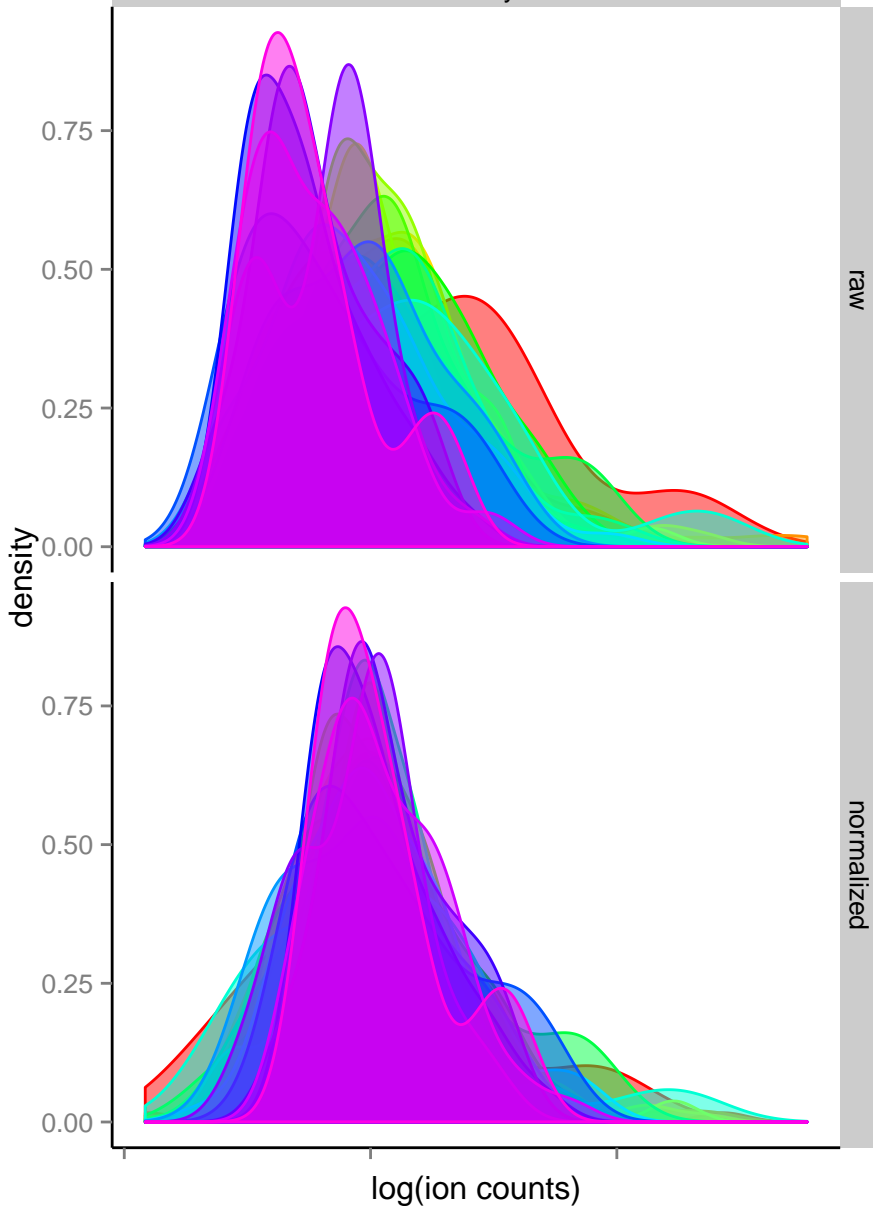

## PLATFORMRUNDAY\_miss

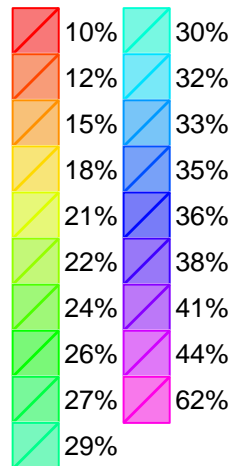

# X-11497

runday

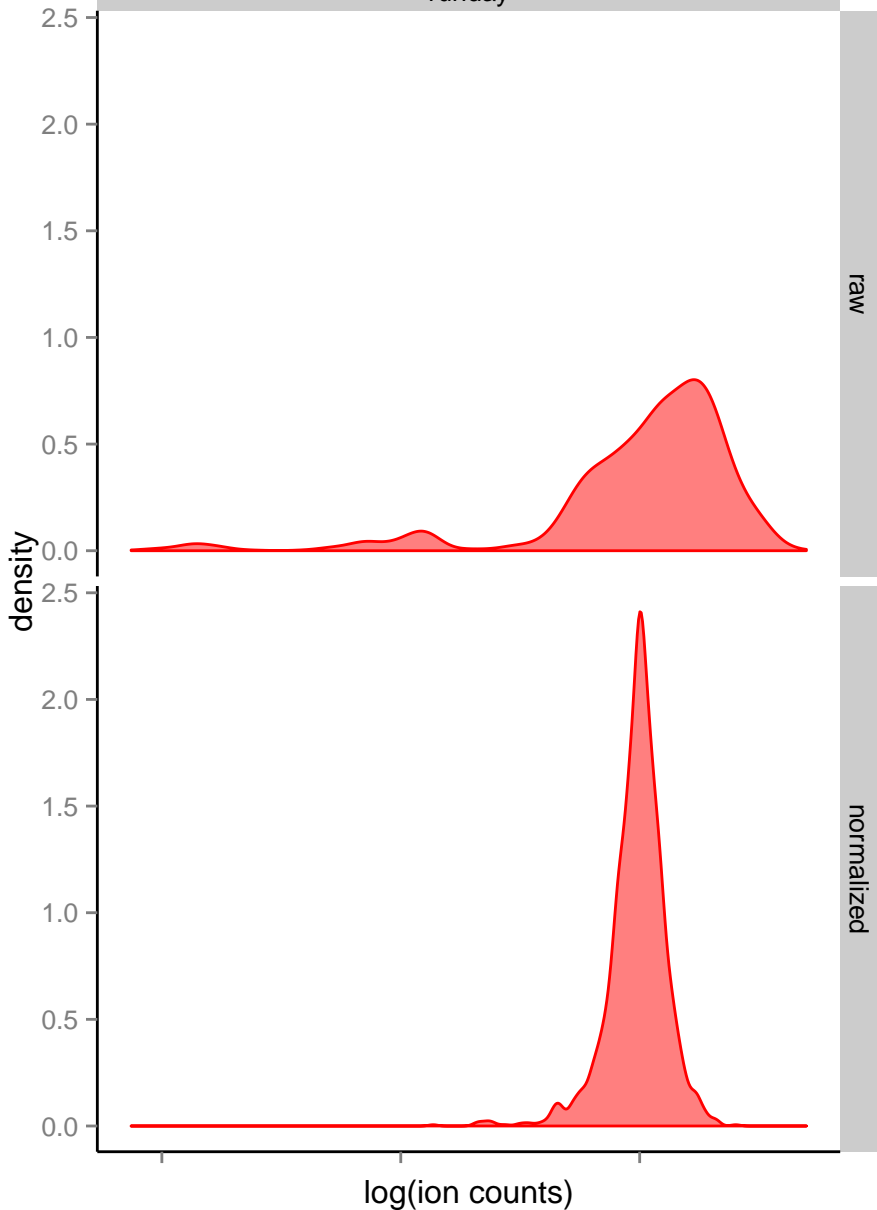

raw

normalized

**PLATFORMRUNDAY\_miss**

0%

log(ion counts)



# X-11521

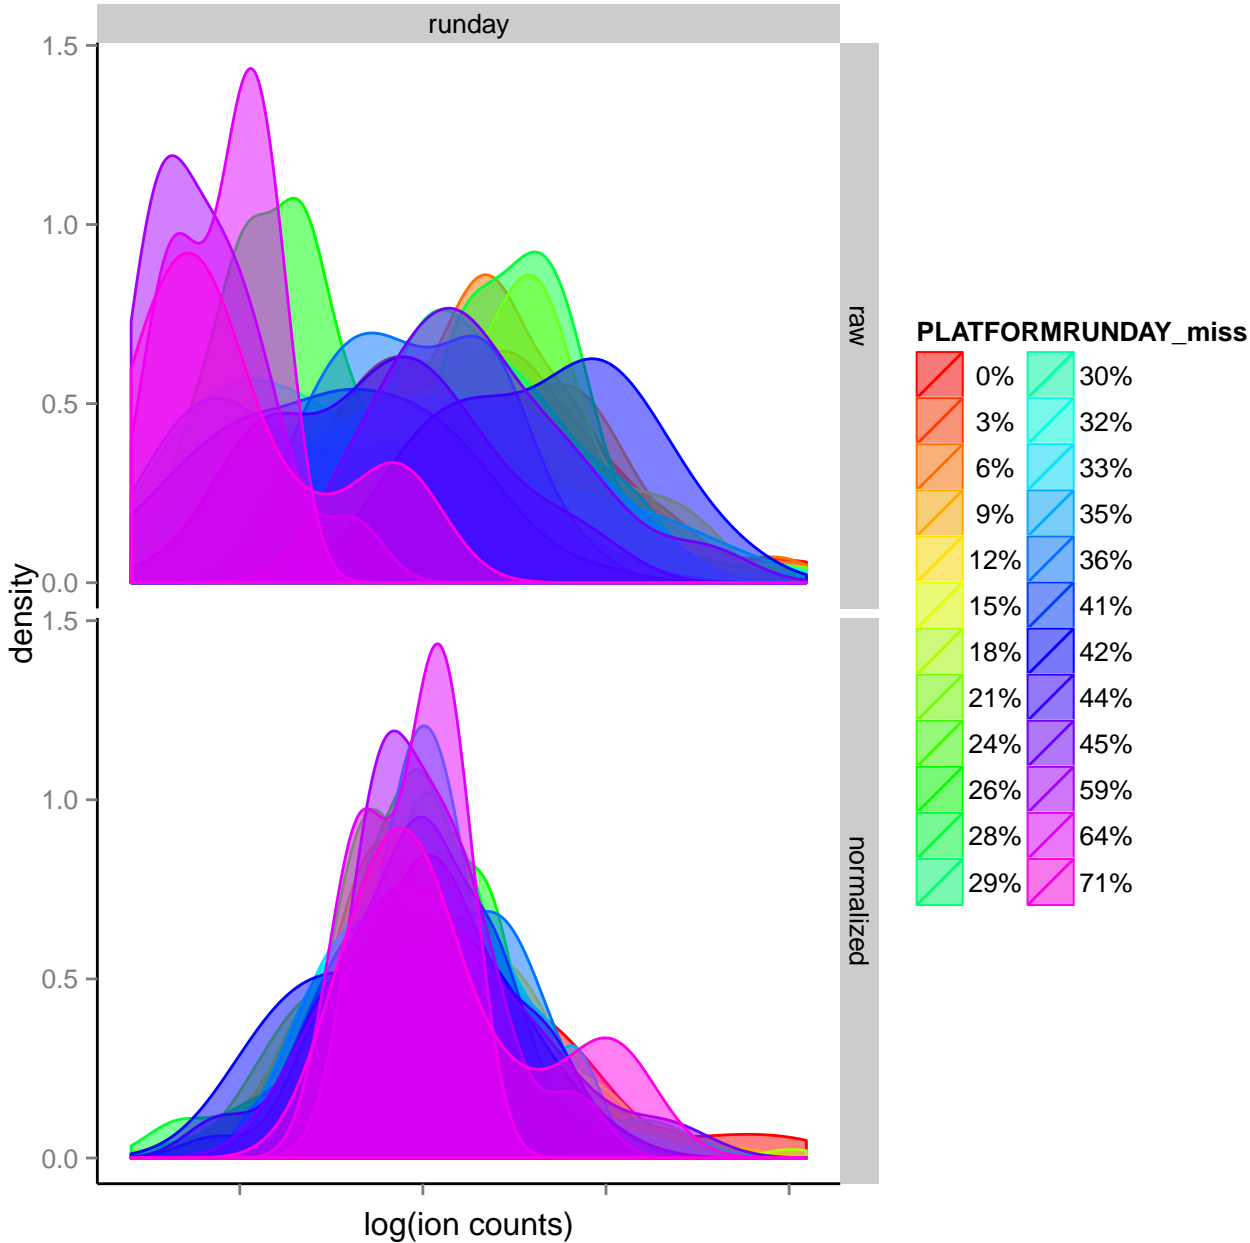

# X-11529

runday

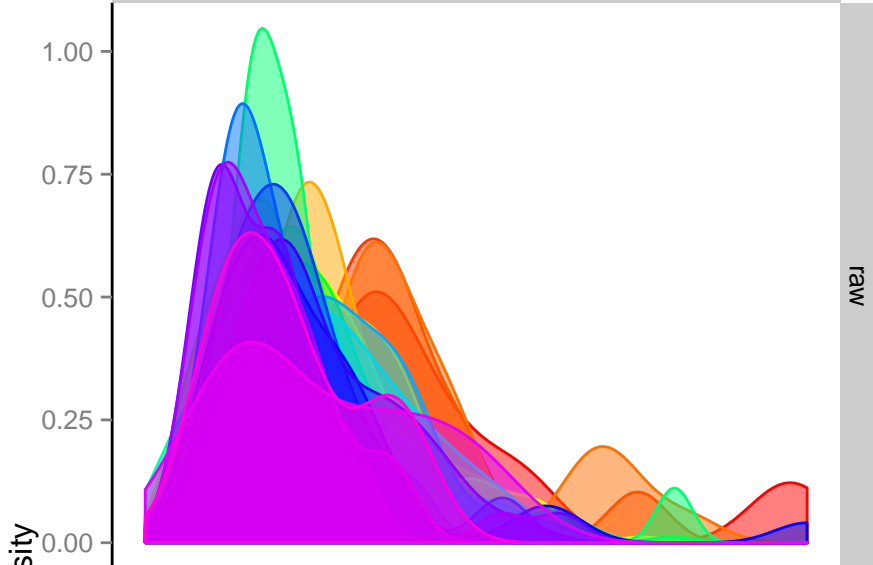

raw

**PLATFORMRUNDAY\_miss**

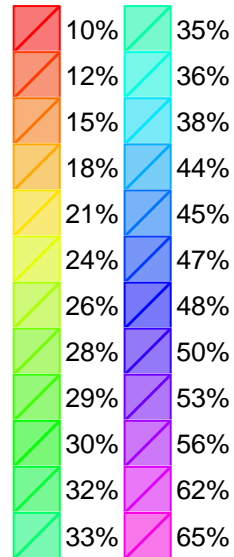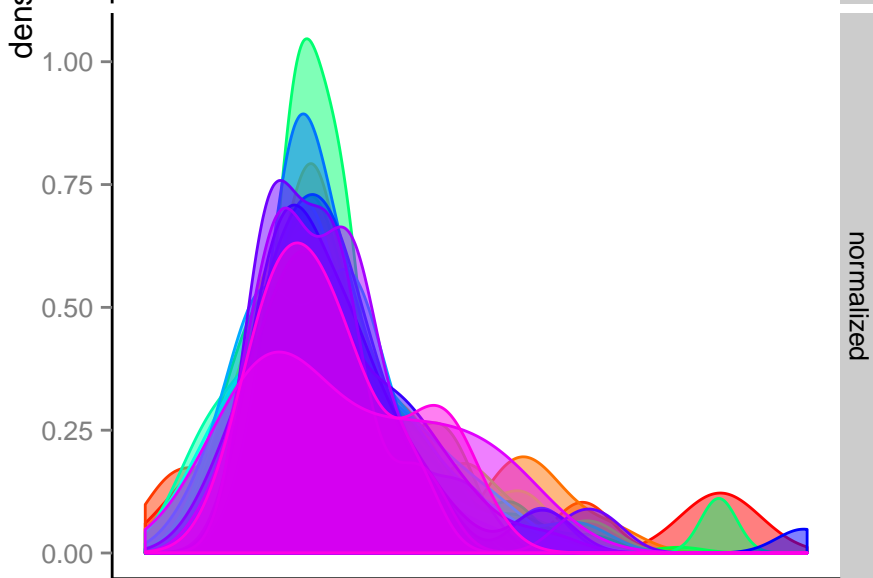

normalized

log(ion counts)

# X-11530

runday

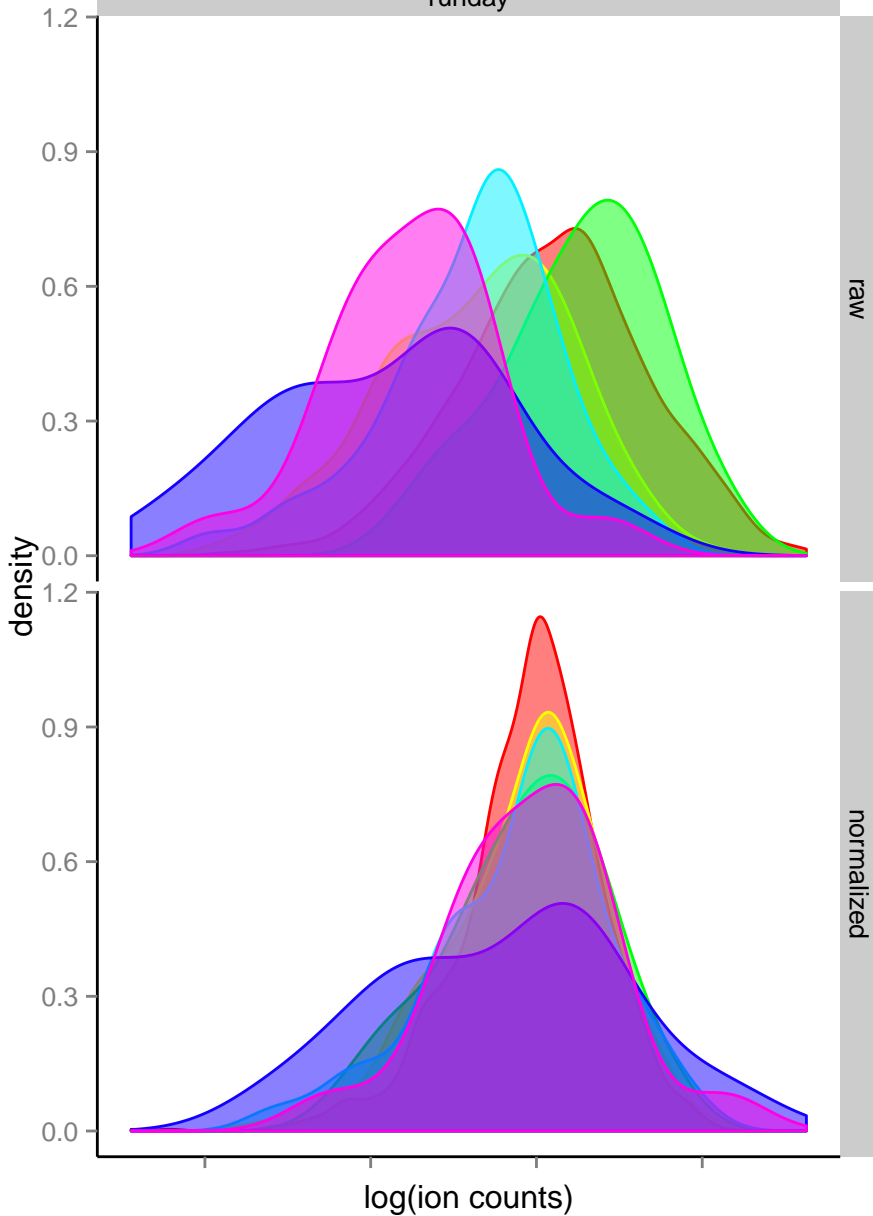

raw

normalized

**PLATFORMRUNDAY\_miss**

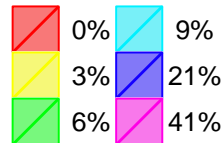

# X-11537

runday

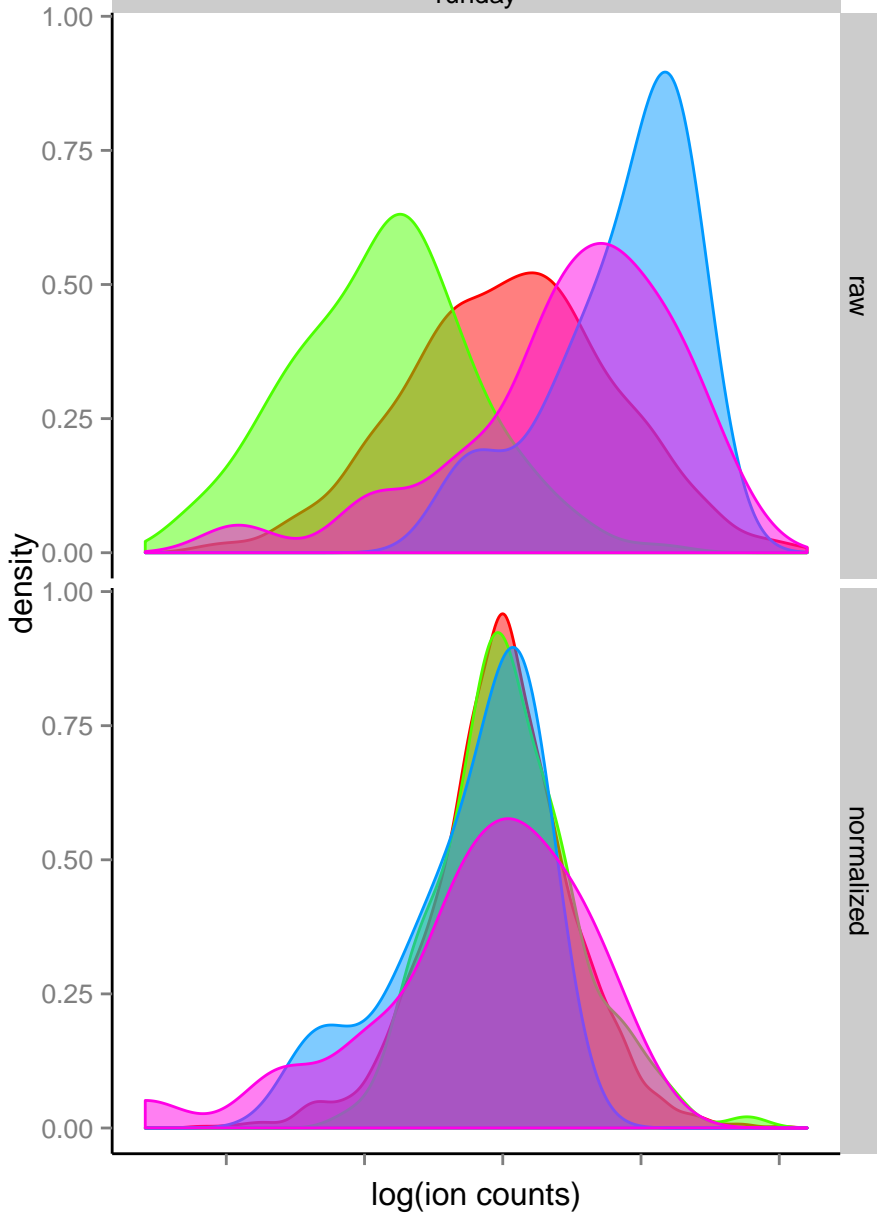

**PLATFORMRUNDAY\_miss**

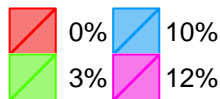

# X-11538

runday

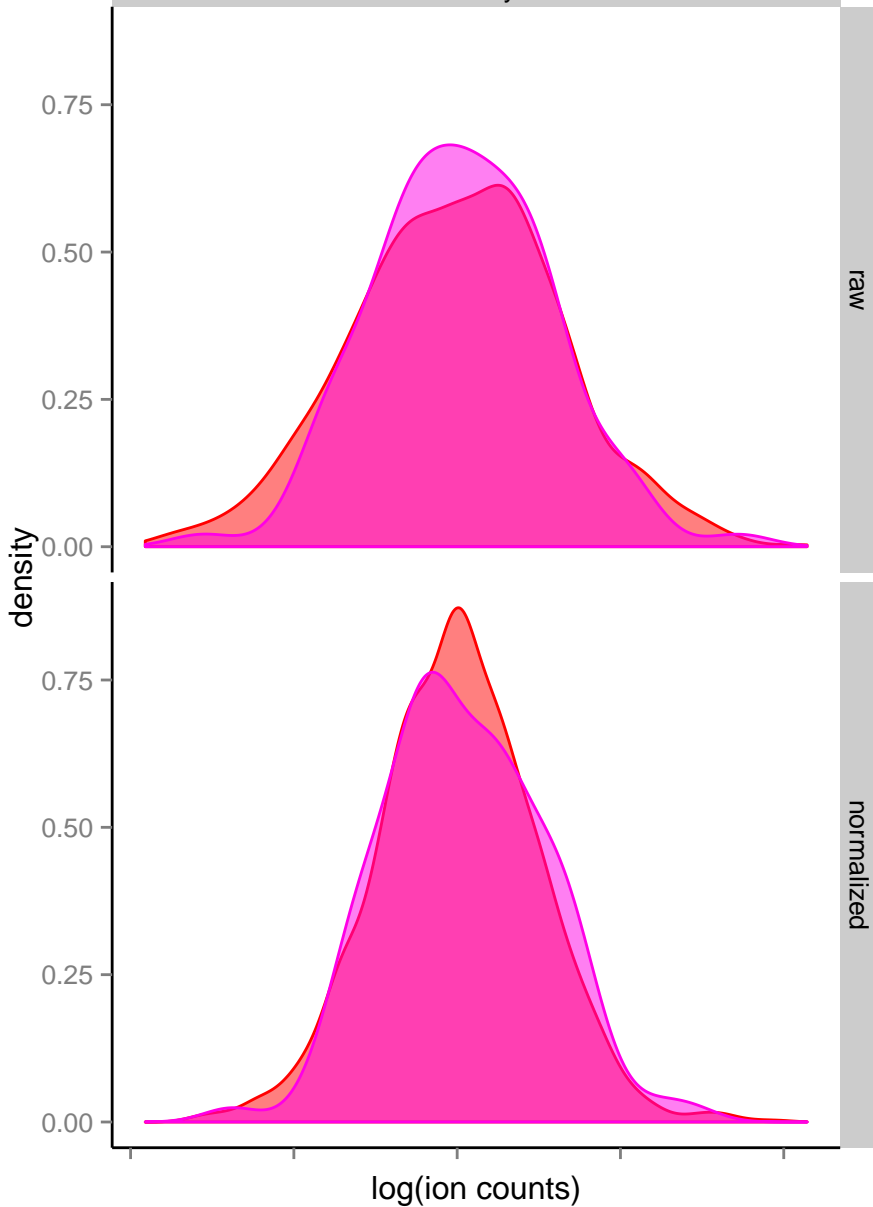

raw

normalized

**PLATFORMRUNDAY\_miss**



0%



3%

# X-11540

runday

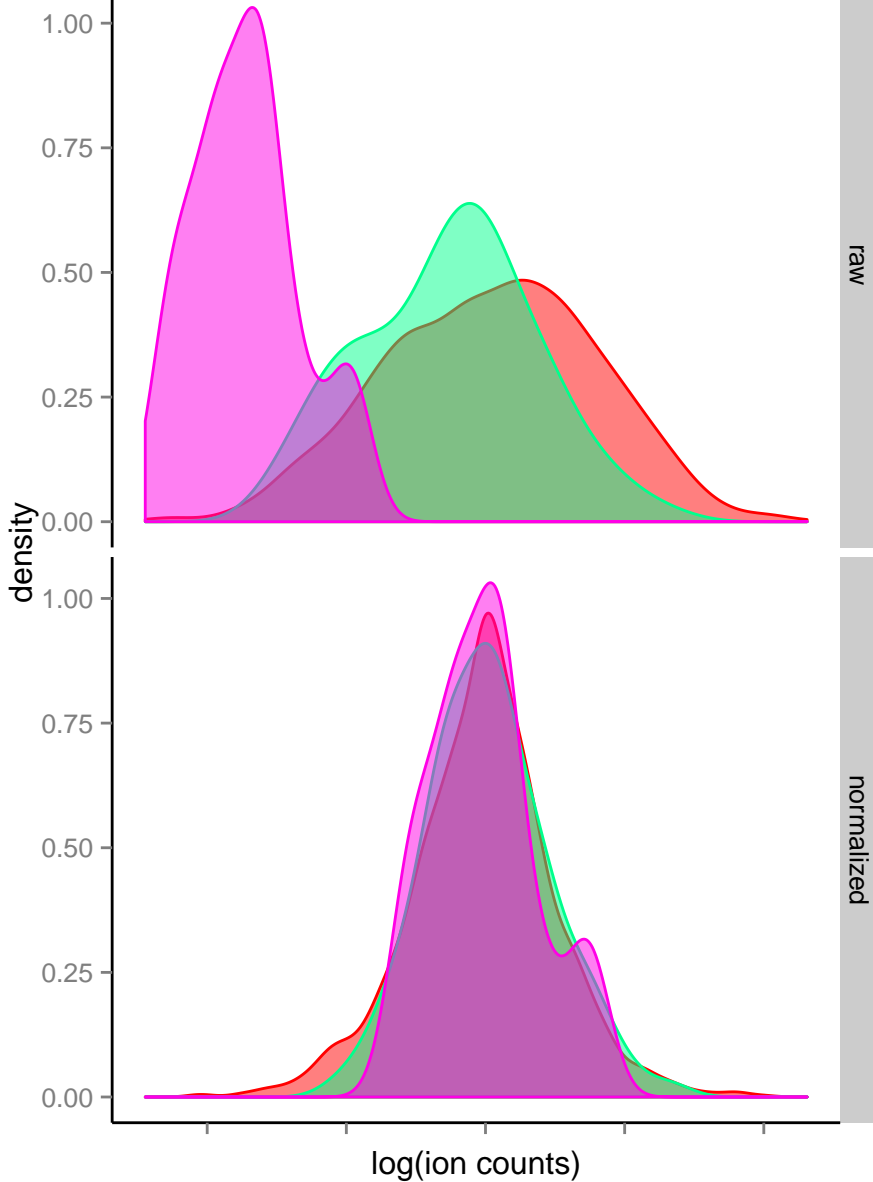

raw

normalized

**PLATFORMRUNDAY\_miss**

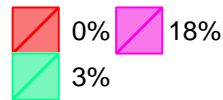

# X-11546

runday

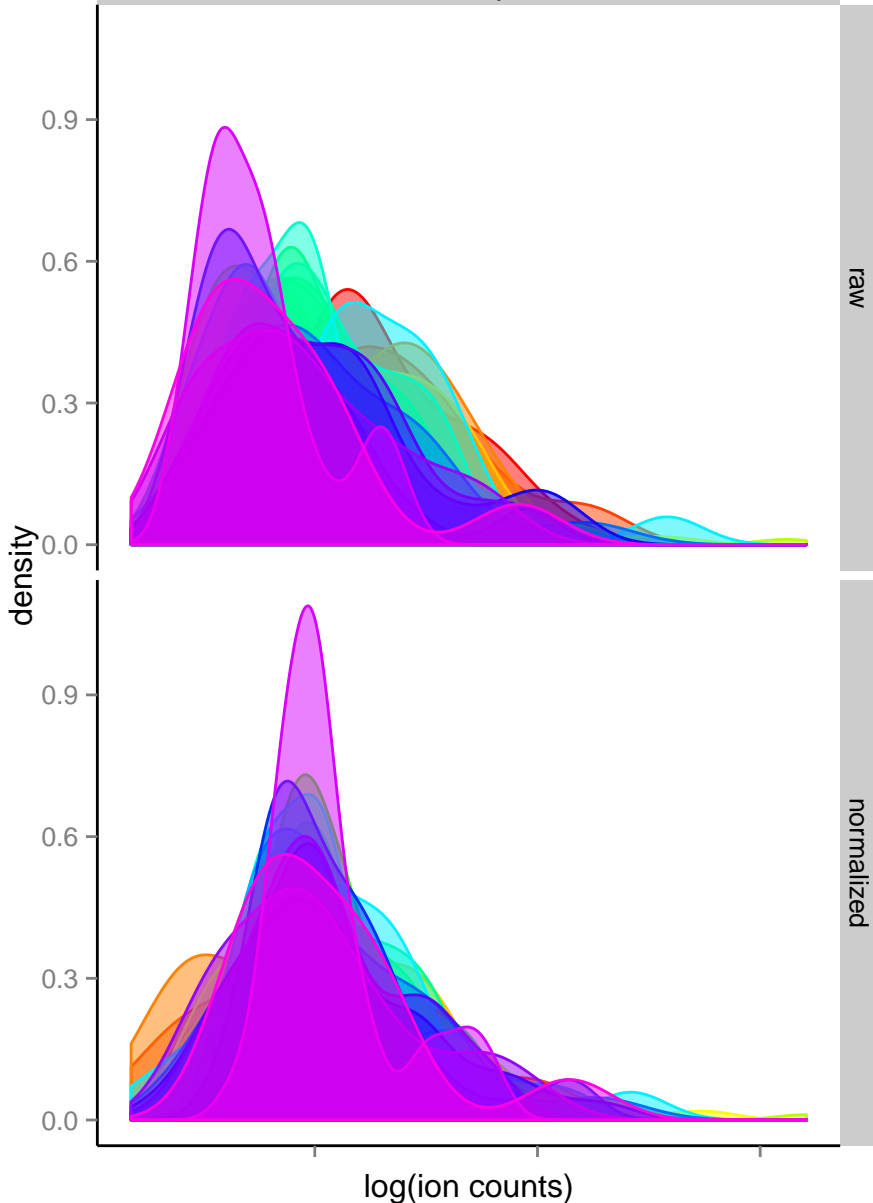

**PLATFORMRUNDAY\_miss**

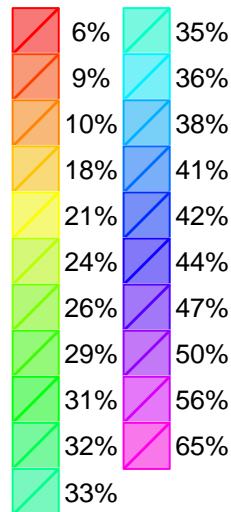

X-11550

runday

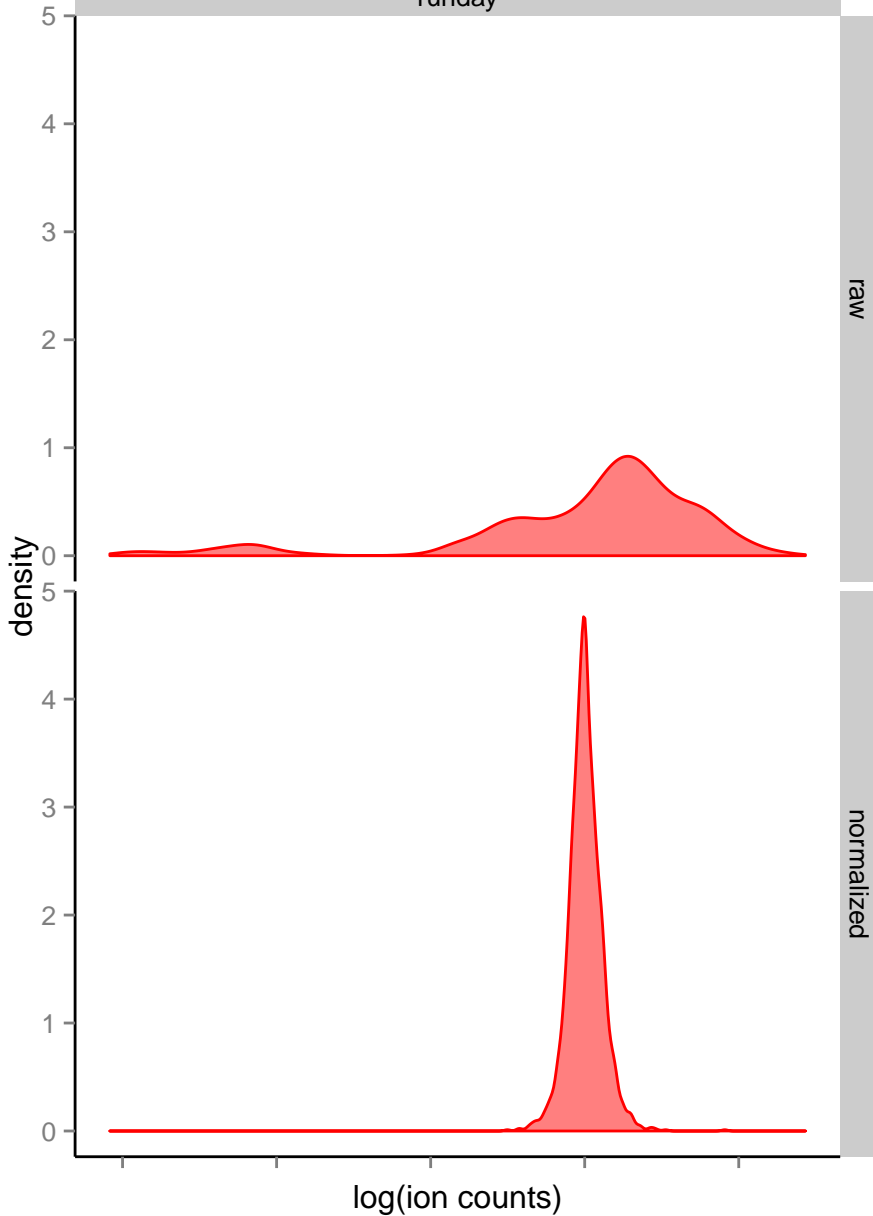

PLATFORMRUNDAY\_miss

0%



# X-11552

runday

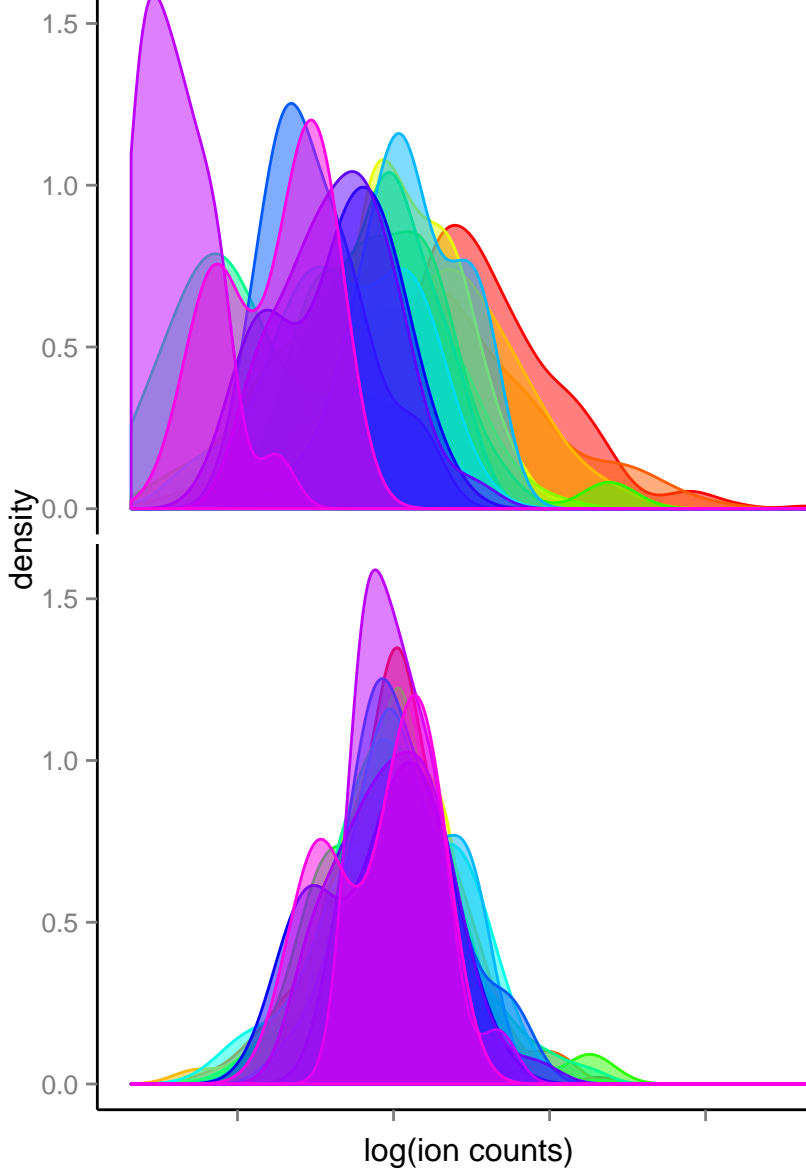

raw

normalized

## PLATFORMRUNDAY\_miss

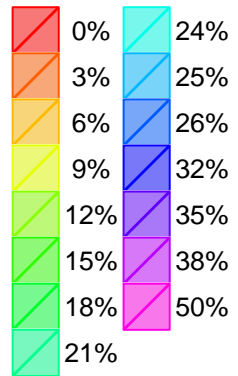

# ergothioneine

runday

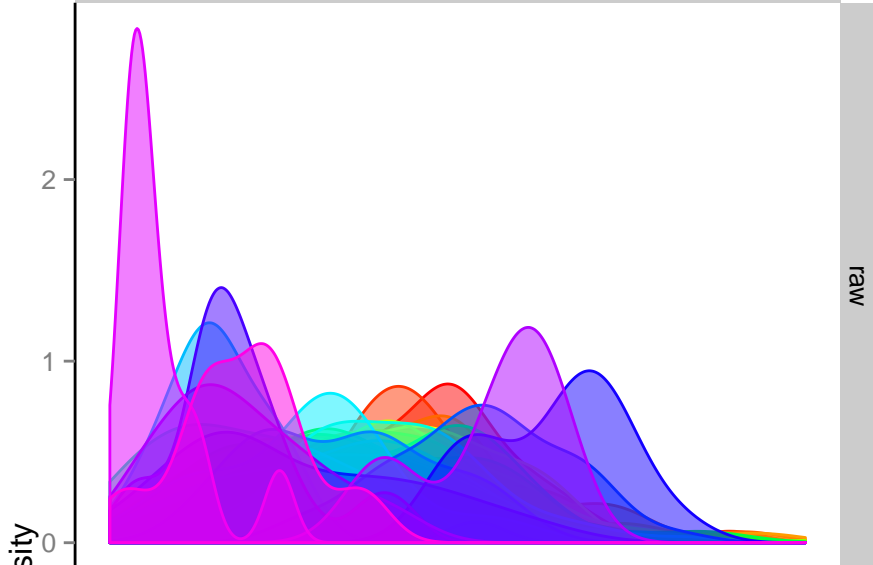

raw

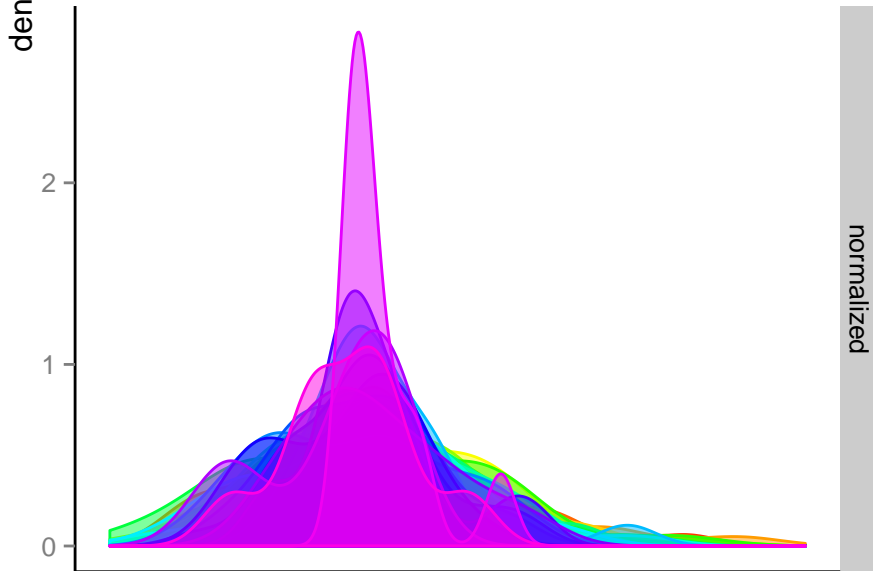

normalized

## PLATFORMRUNDAY\_miss

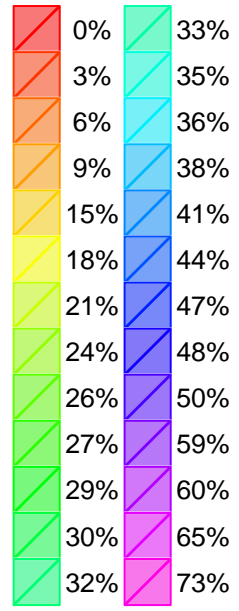

log(ion counts)

# O-methylascorbate\*

runday

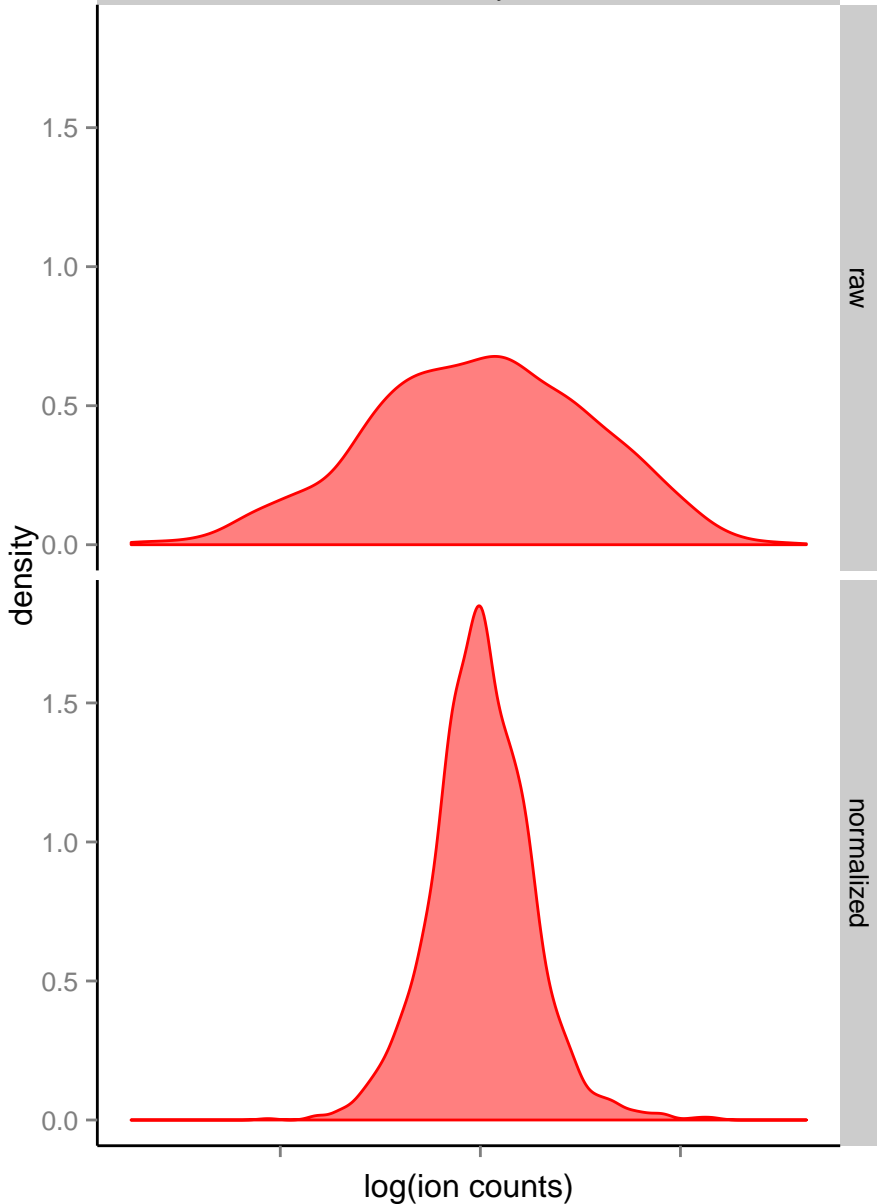

raw

normalized

**PLATFORMRUNDAY\_miss**

0%

# methylcysteine

runday

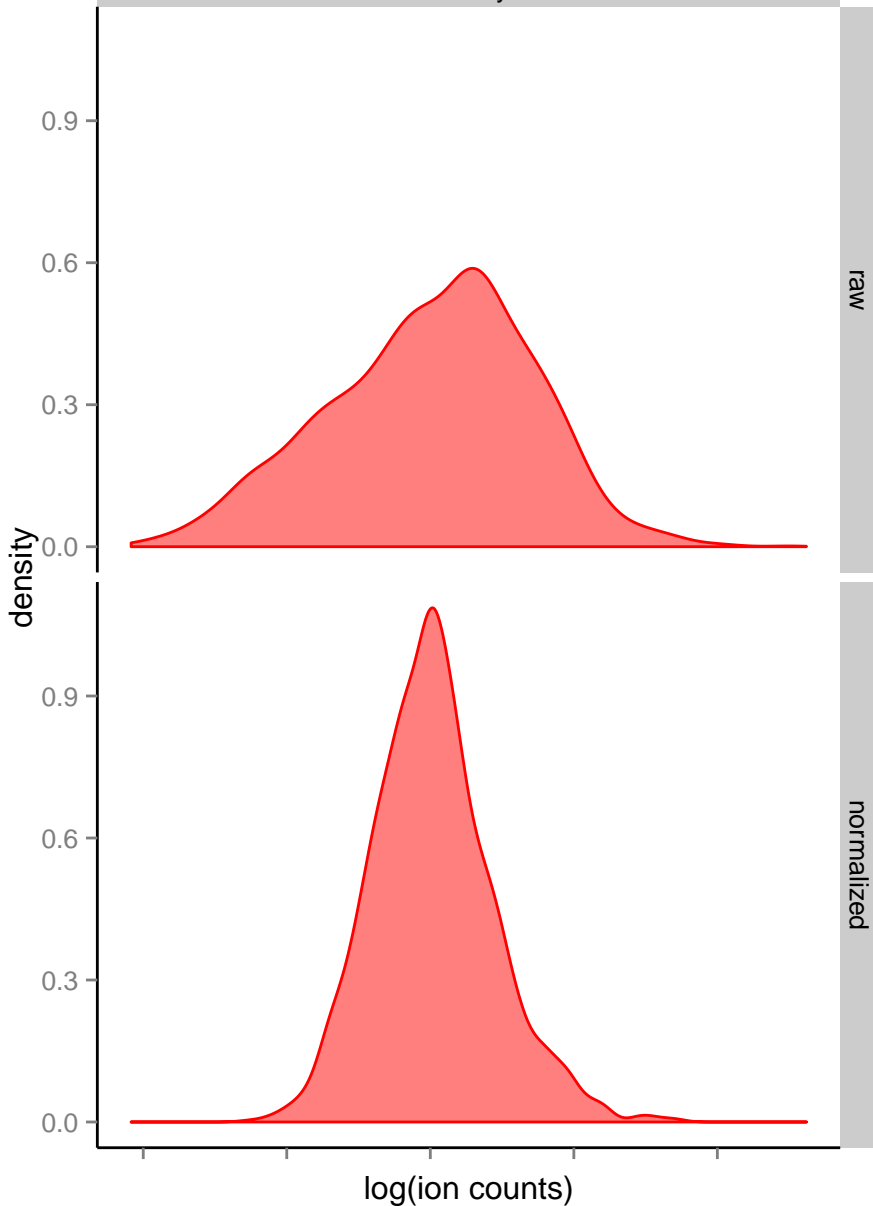

raw

normalized

**PLATFORMRUNDAY\_miss**



0%

# X-11787

runday

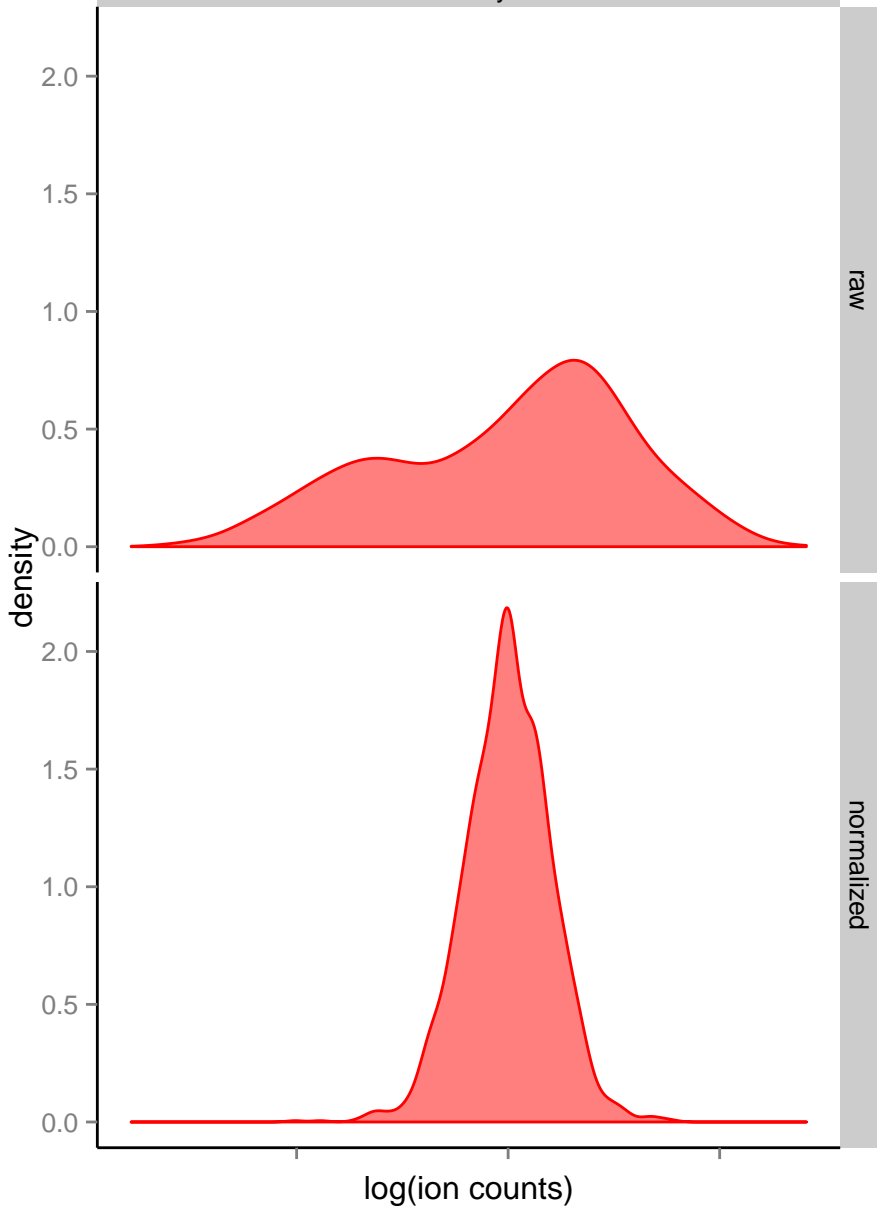

**PLATFORMRUNDAY\_miss**

0%

# X-11792

runday

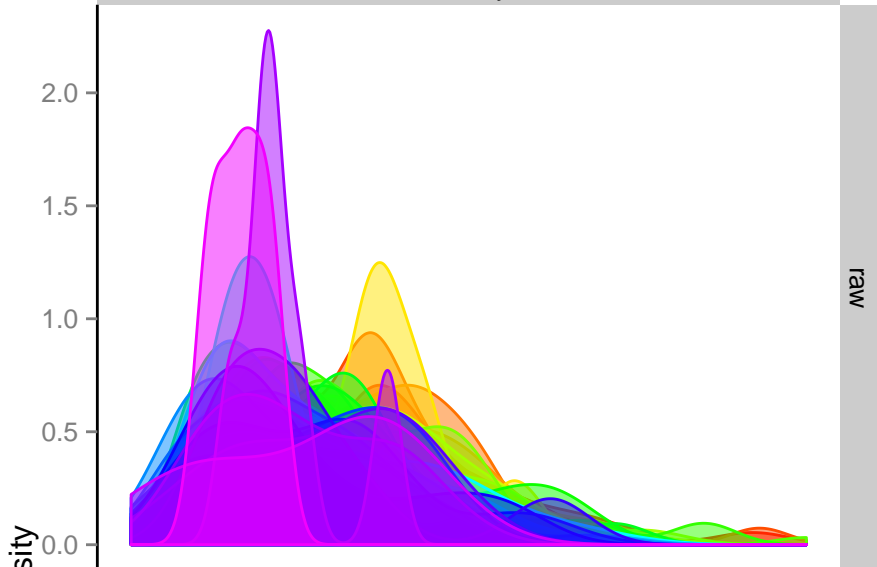

raw

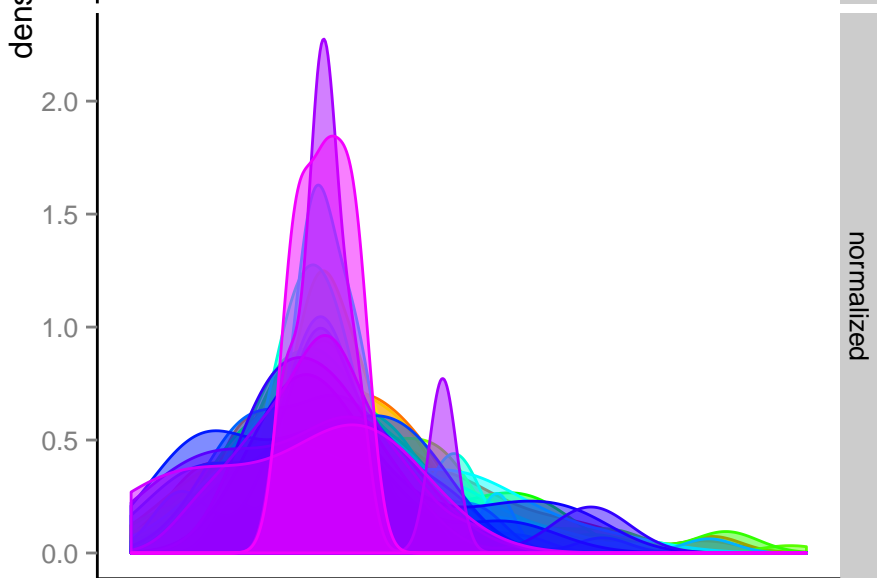

normalized

## PLATFORMRUNDAY\_miss

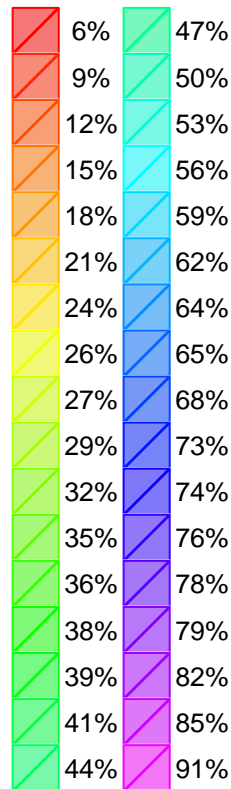

log(ion counts)

# oxidized bilirubin\*

runday

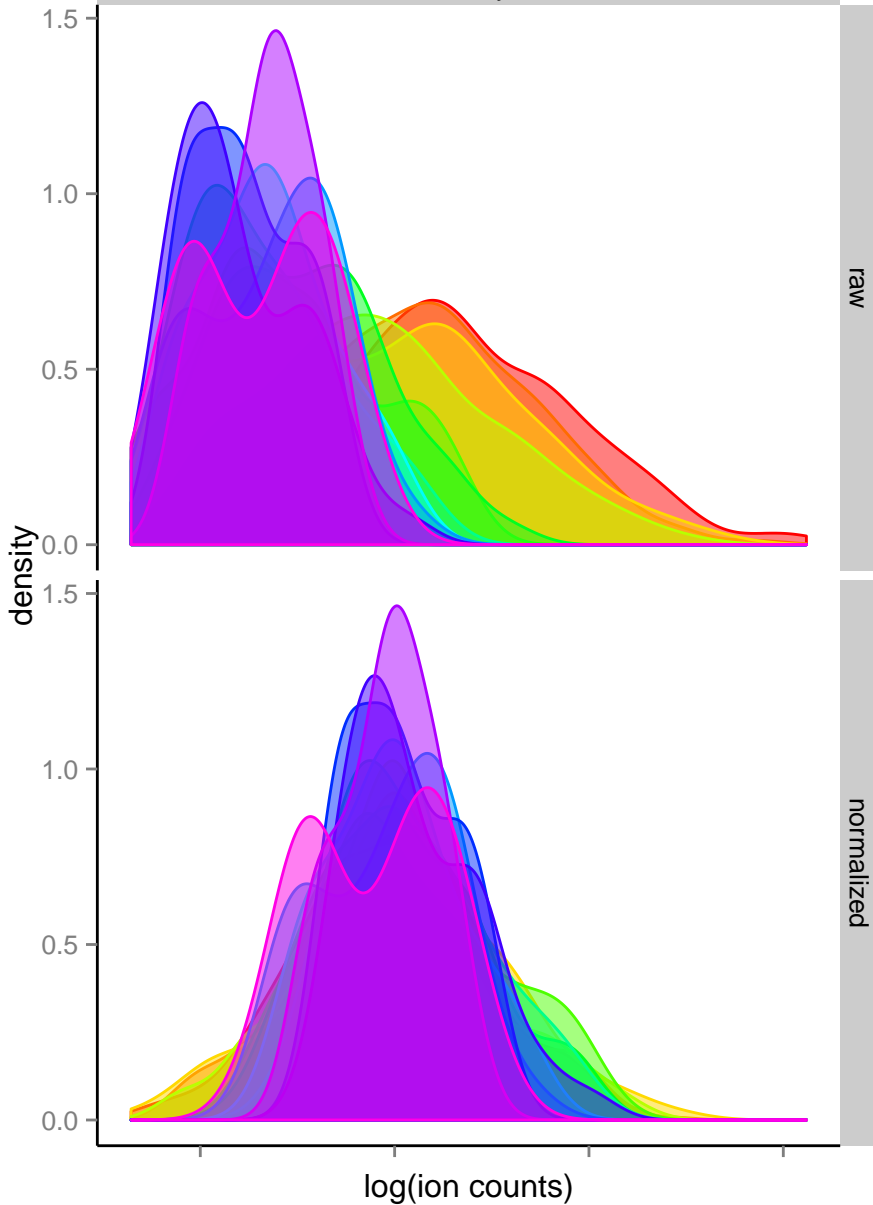

## PLATFORMRUNDAY\_miss

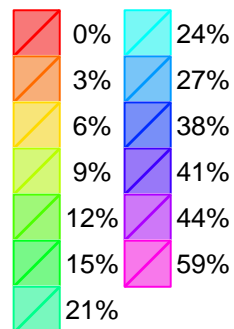

# X-11795

runday

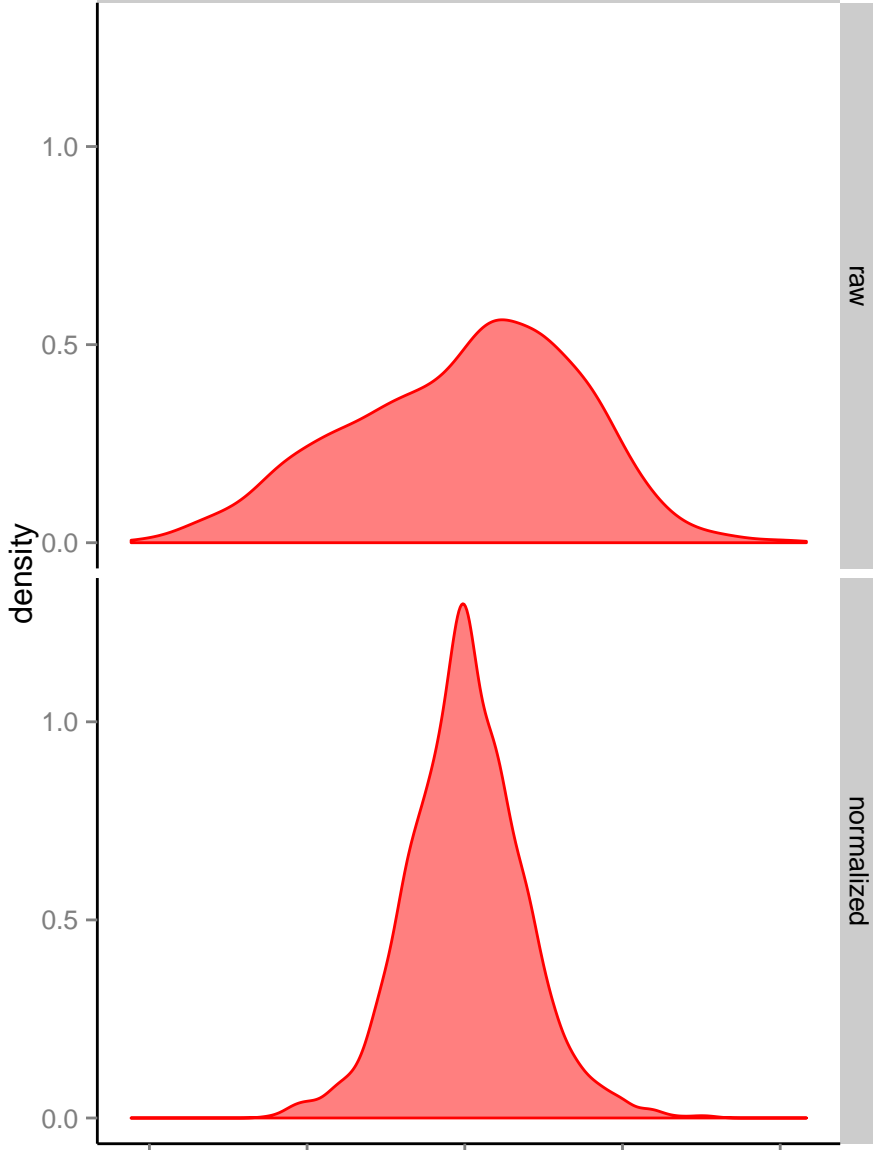

raw

normalized

**PLATFORMRUNDAY\_miss**

0%



# X-11799

runday

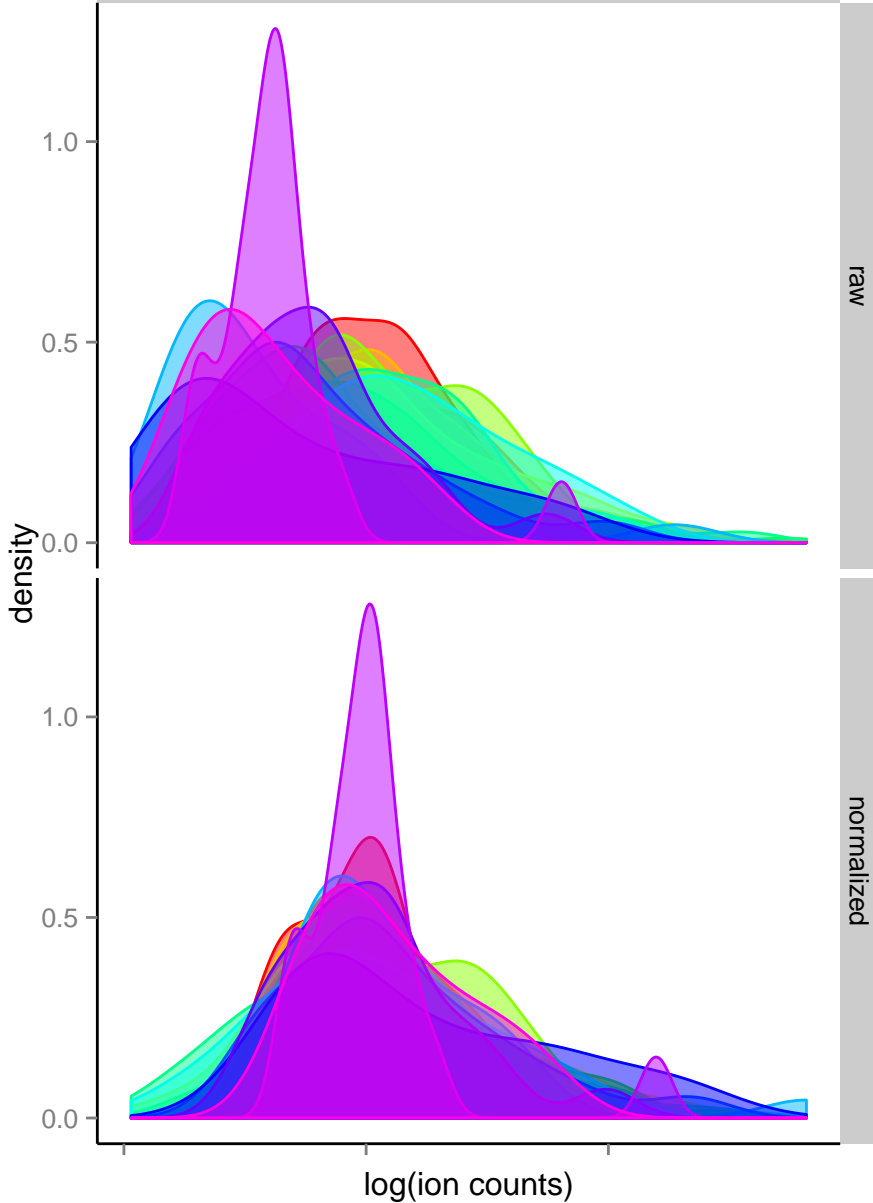

## PLATFORMRUNDAY\_miss

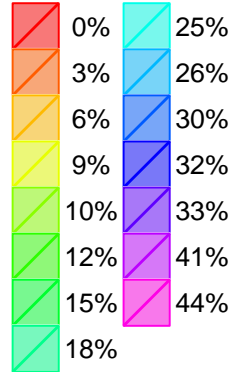

# X-11805

runday

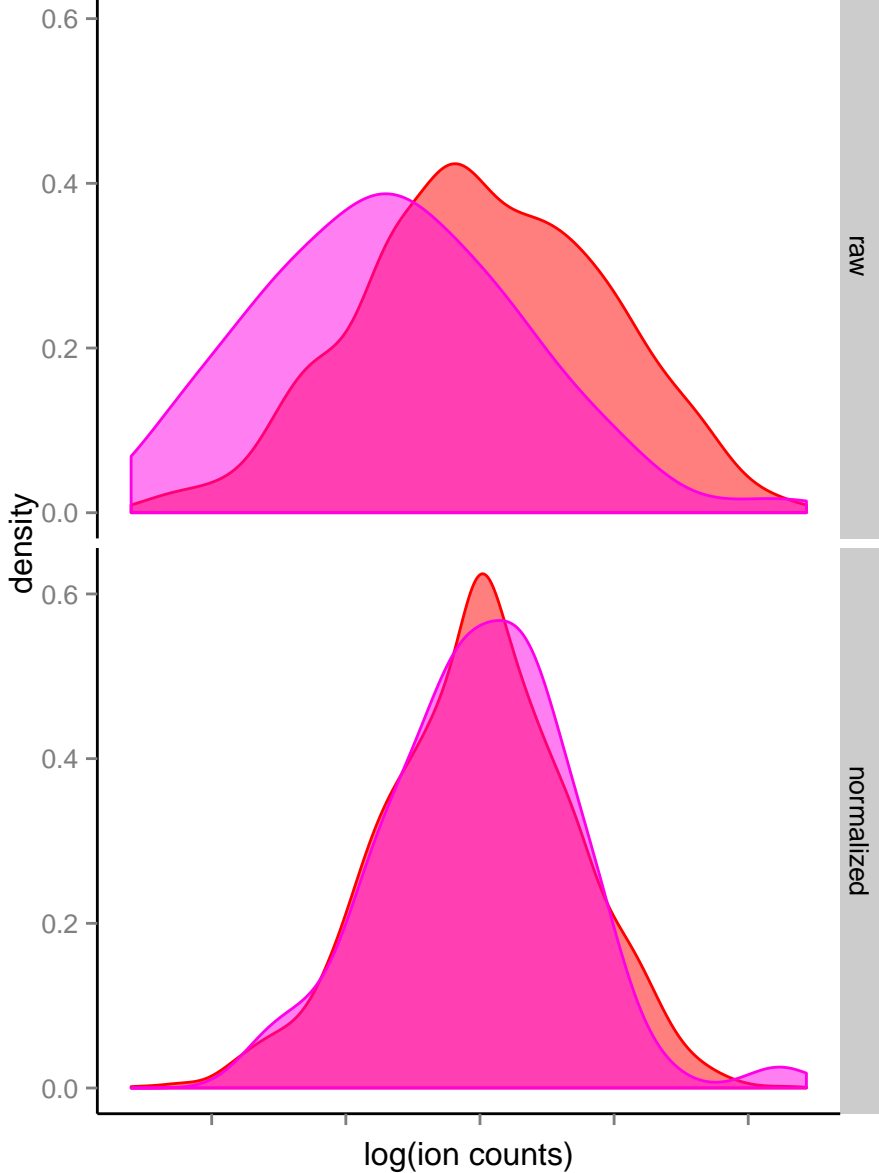

raw

normalized

**PLATFORMRUNDAY\_miss**



0%



3%

# X-11809

runday

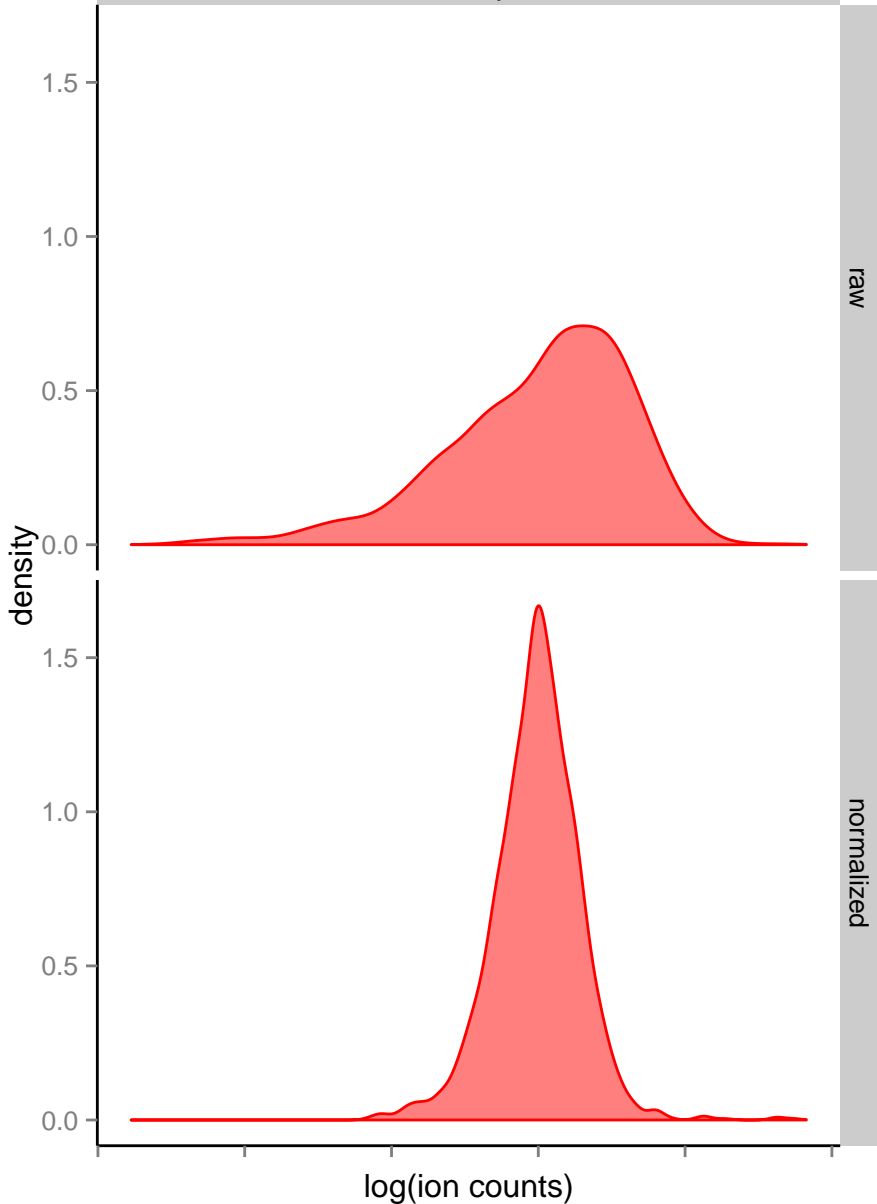

raw

normalized

**PLATFORMRUNDAY\_miss**

0%

# X-11818

runday

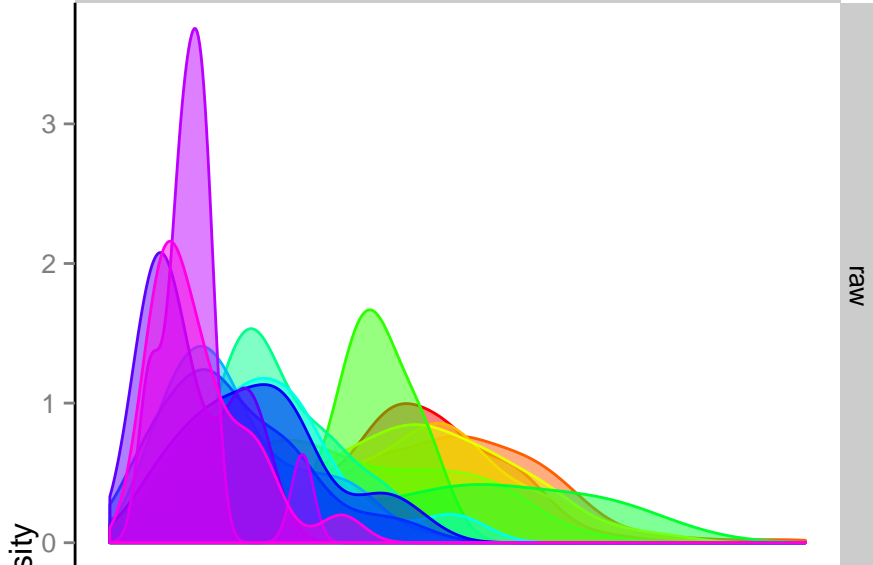

raw

## PLATFORMRUNDAY\_miss

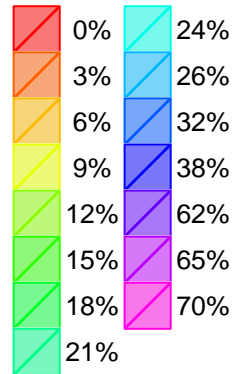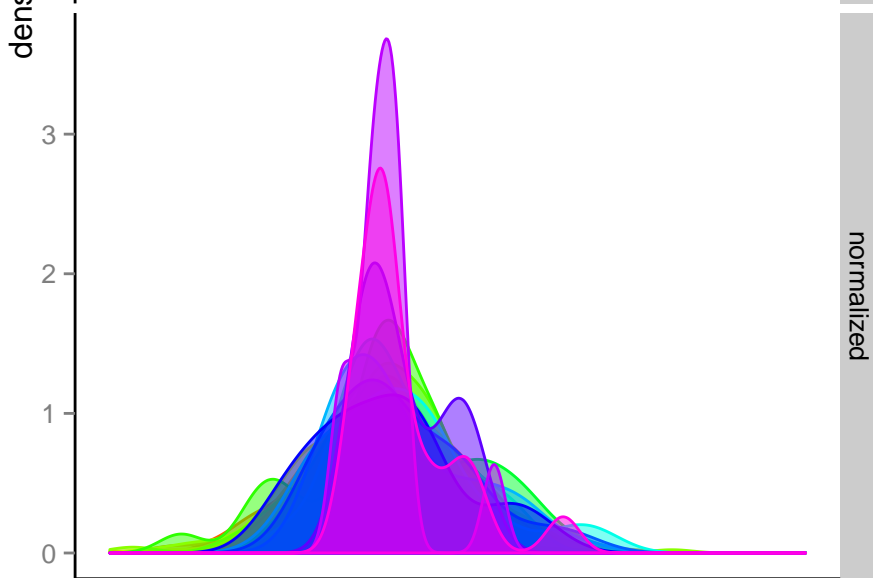

normalized

log(ion counts)

# X-11820

runday

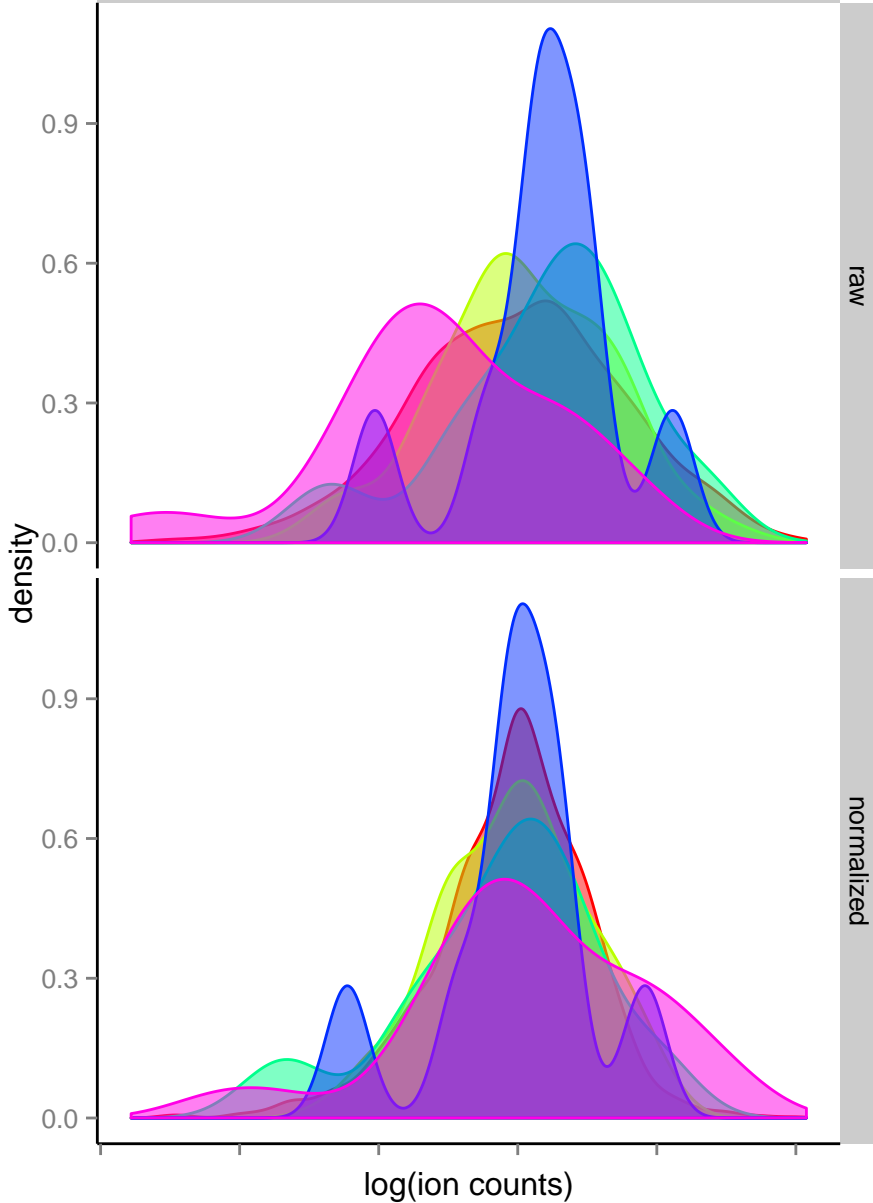

## PLATFORMRUNDAY\_miss

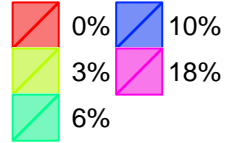

# 4-hydroxyhippurate

runday

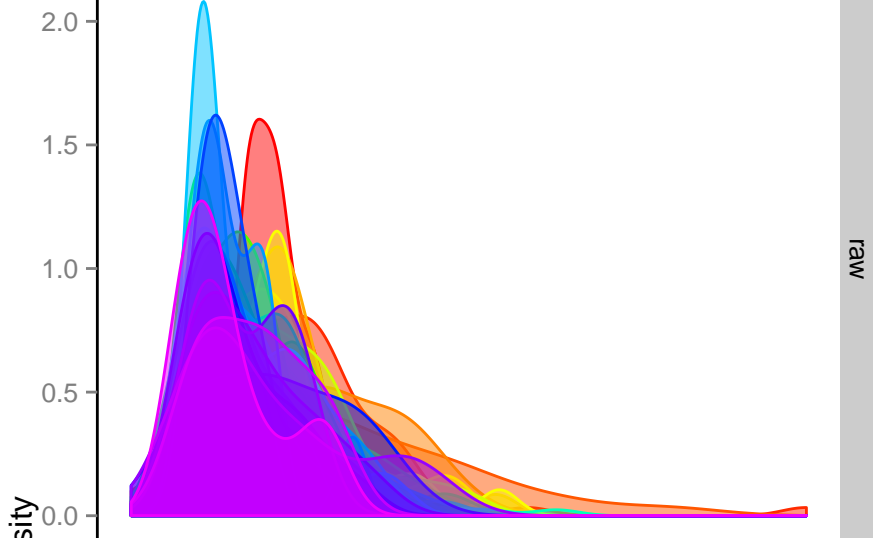

raw

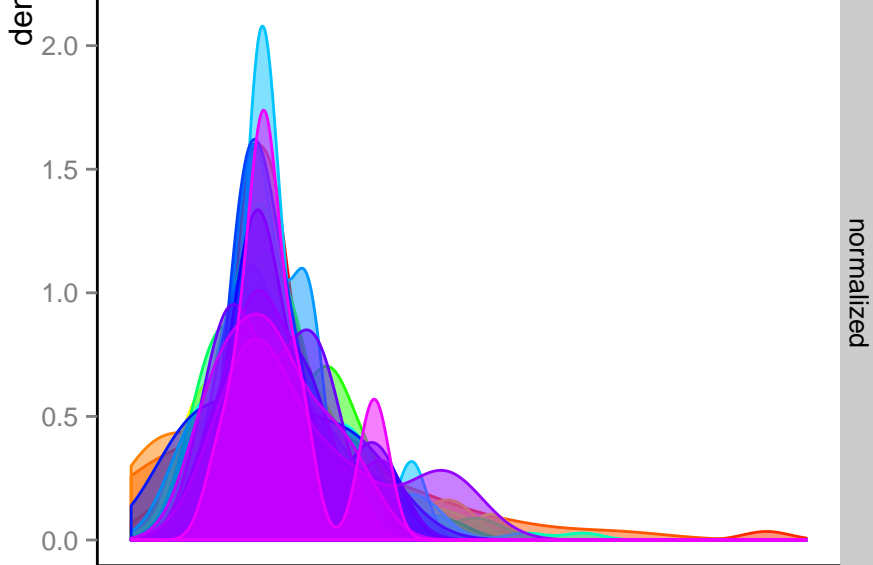

normalized

log(ion counts)

## PLATFORMRUNDAY\_miss

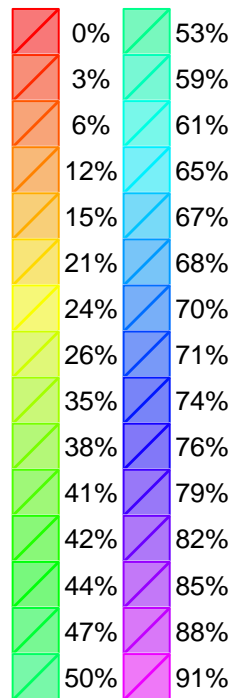

# X-11843

runday

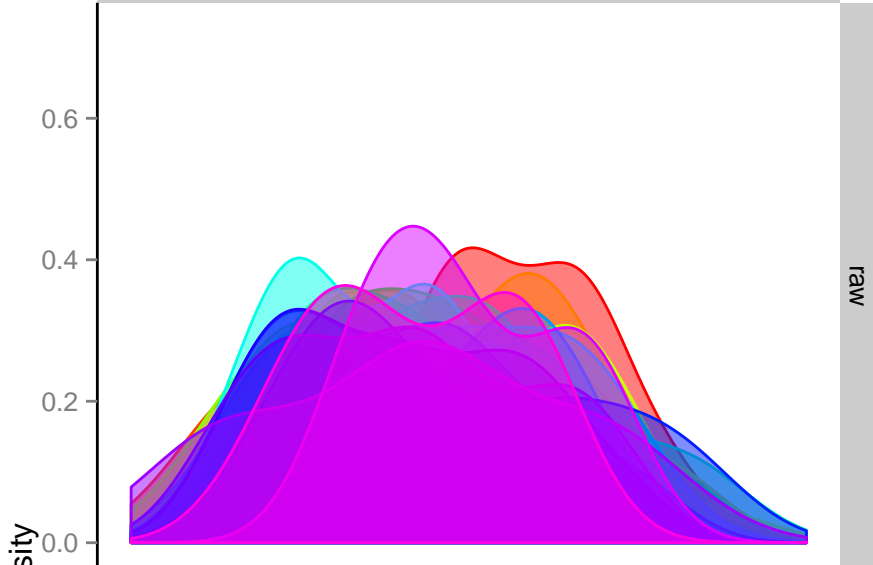

raw

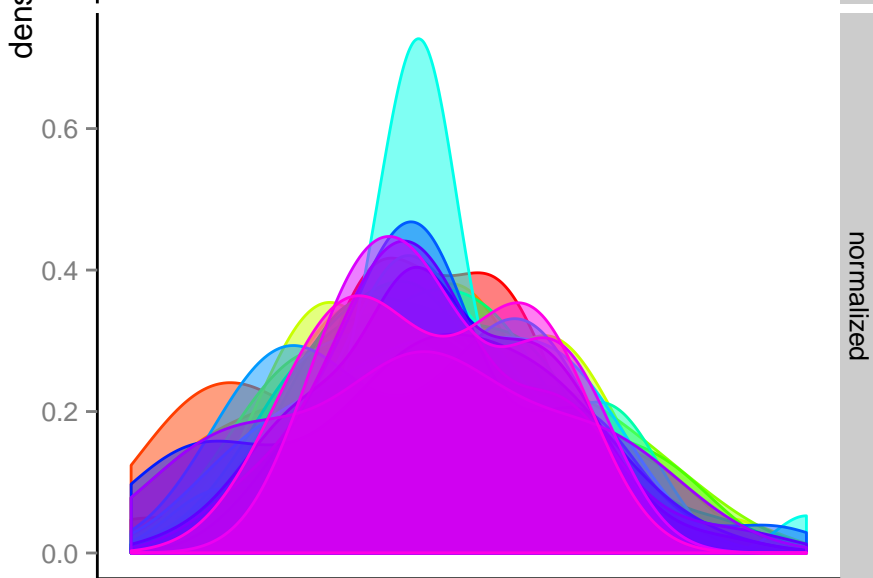

normalized

## PLATFORMRUNDAY\_miss

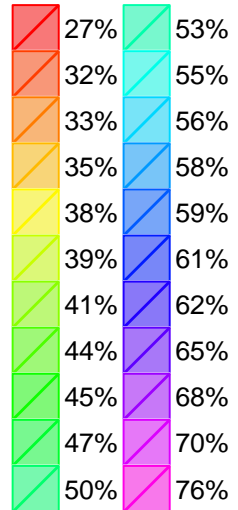

# X-11845

runday

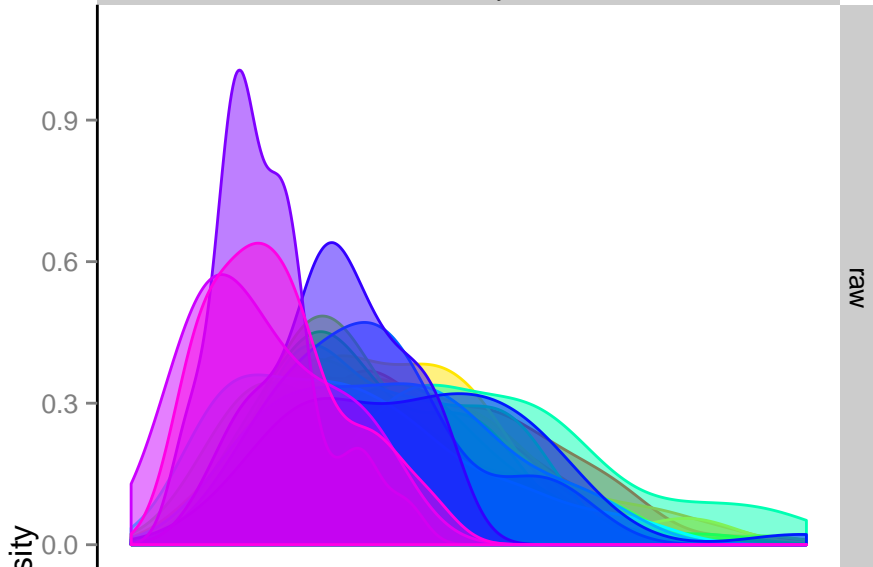

raw

**PLATFORMRUNDAY\_miss**

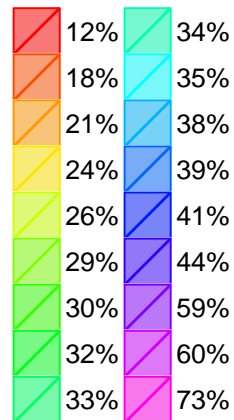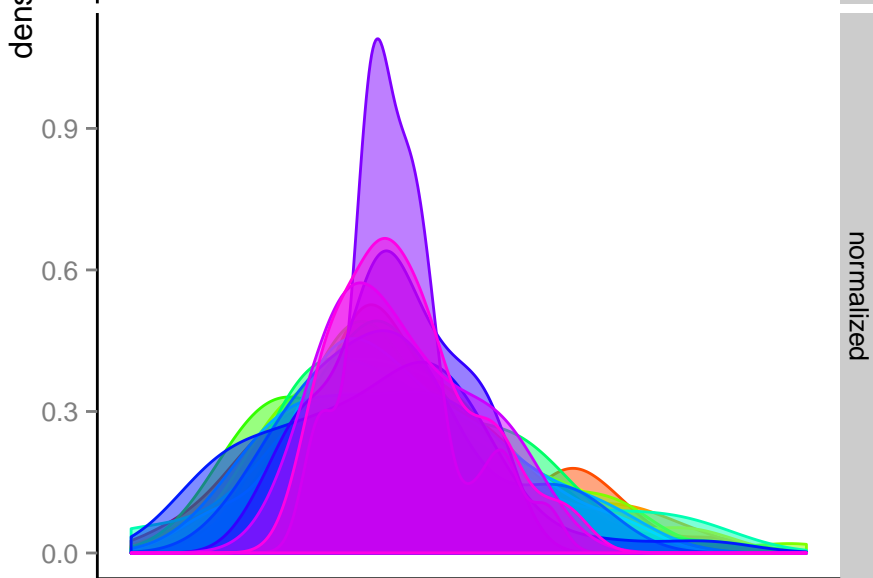

normalized

log(ion counts)



# X-11847

runday

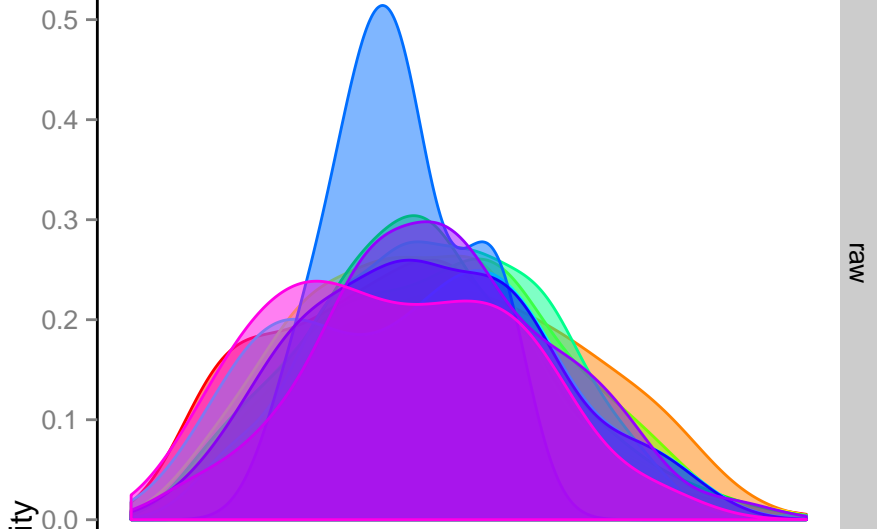

raw

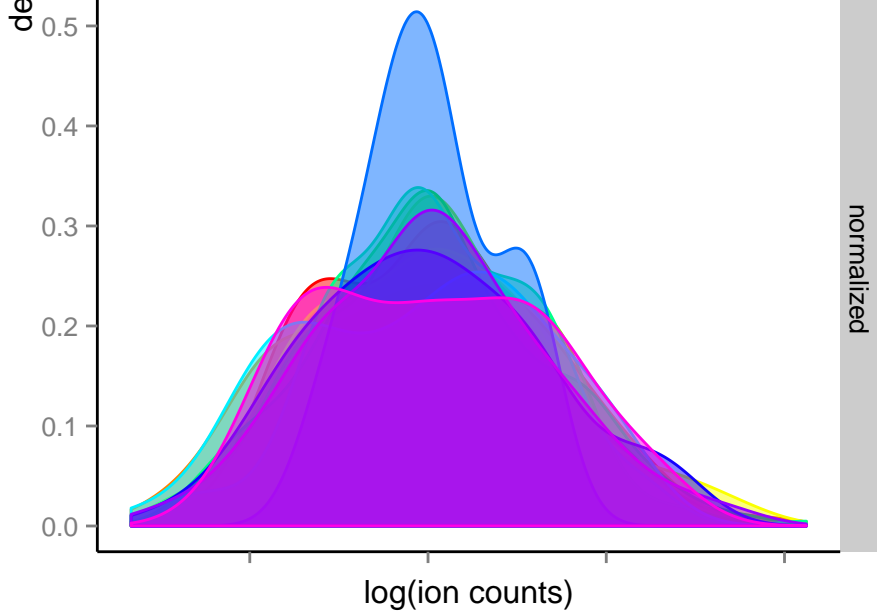

normalized

## PLATFORMRUNDAY\_miss

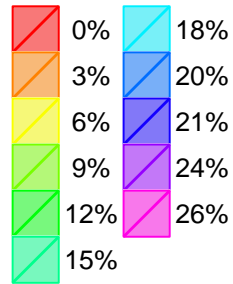

# X-11849

runday

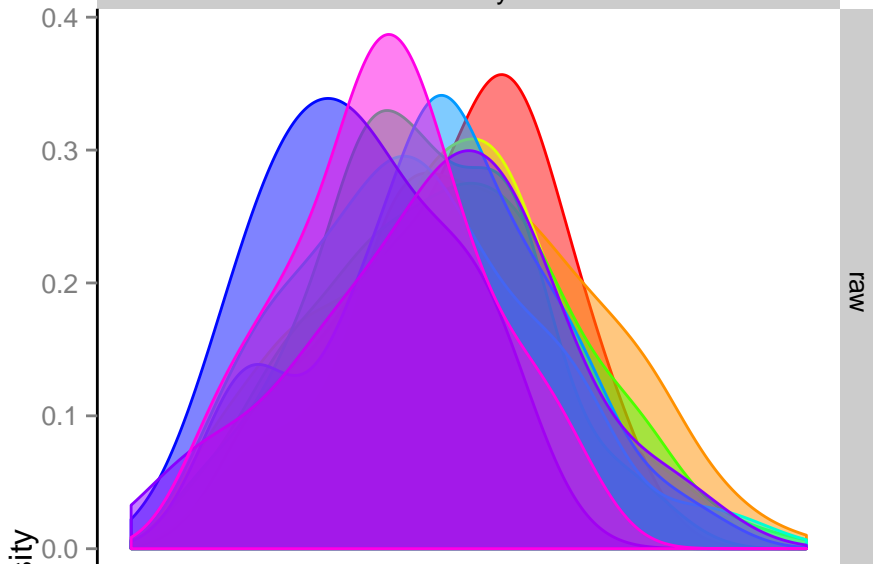

raw

## PLATFORMRUNDAY\_miss

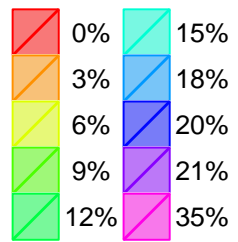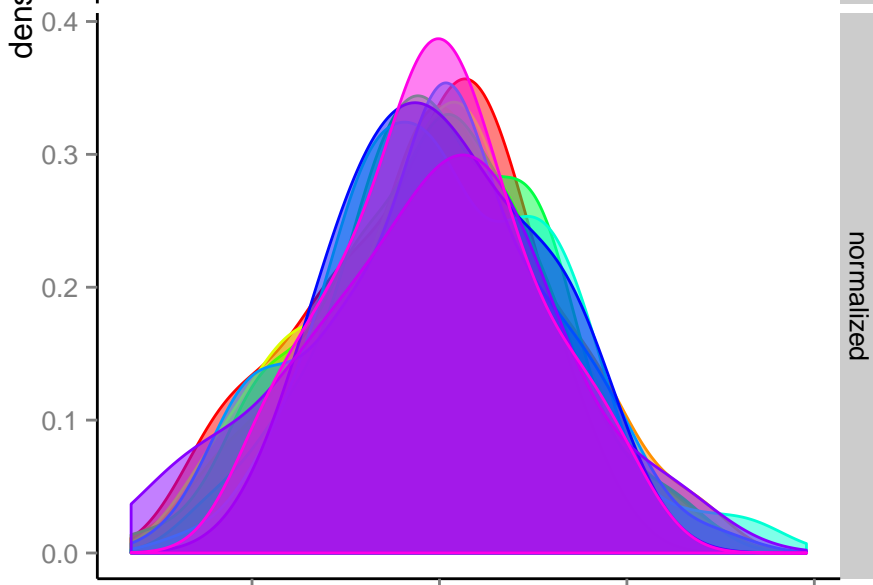

normalized

log(ion counts)

# X-11850

runday

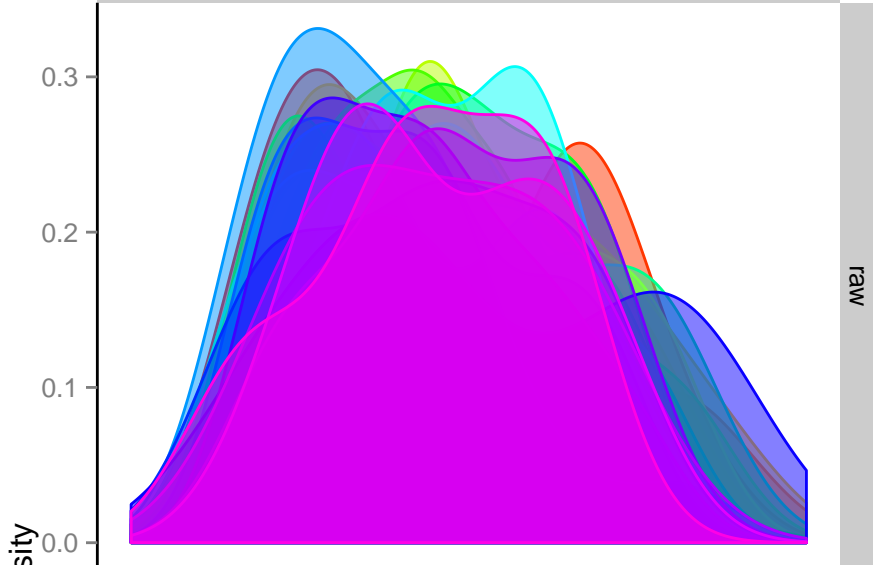

raw

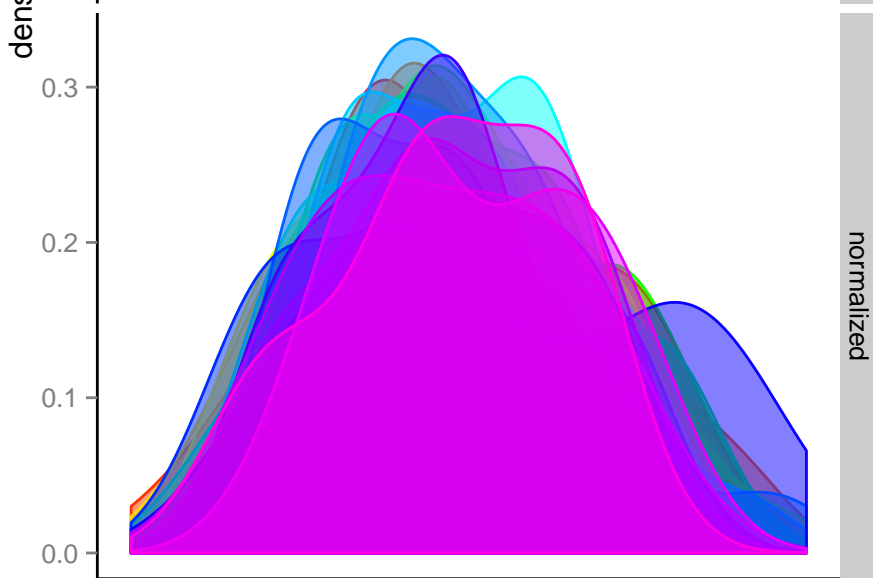

normalized

## PLATFORMRUNDAY\_miss

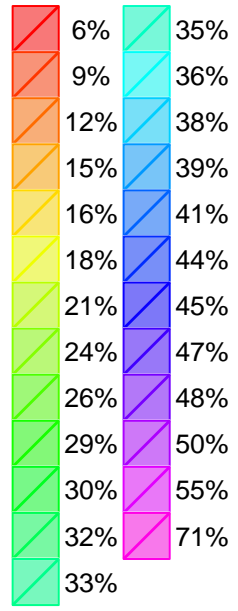

log(ion counts)

# X-11852

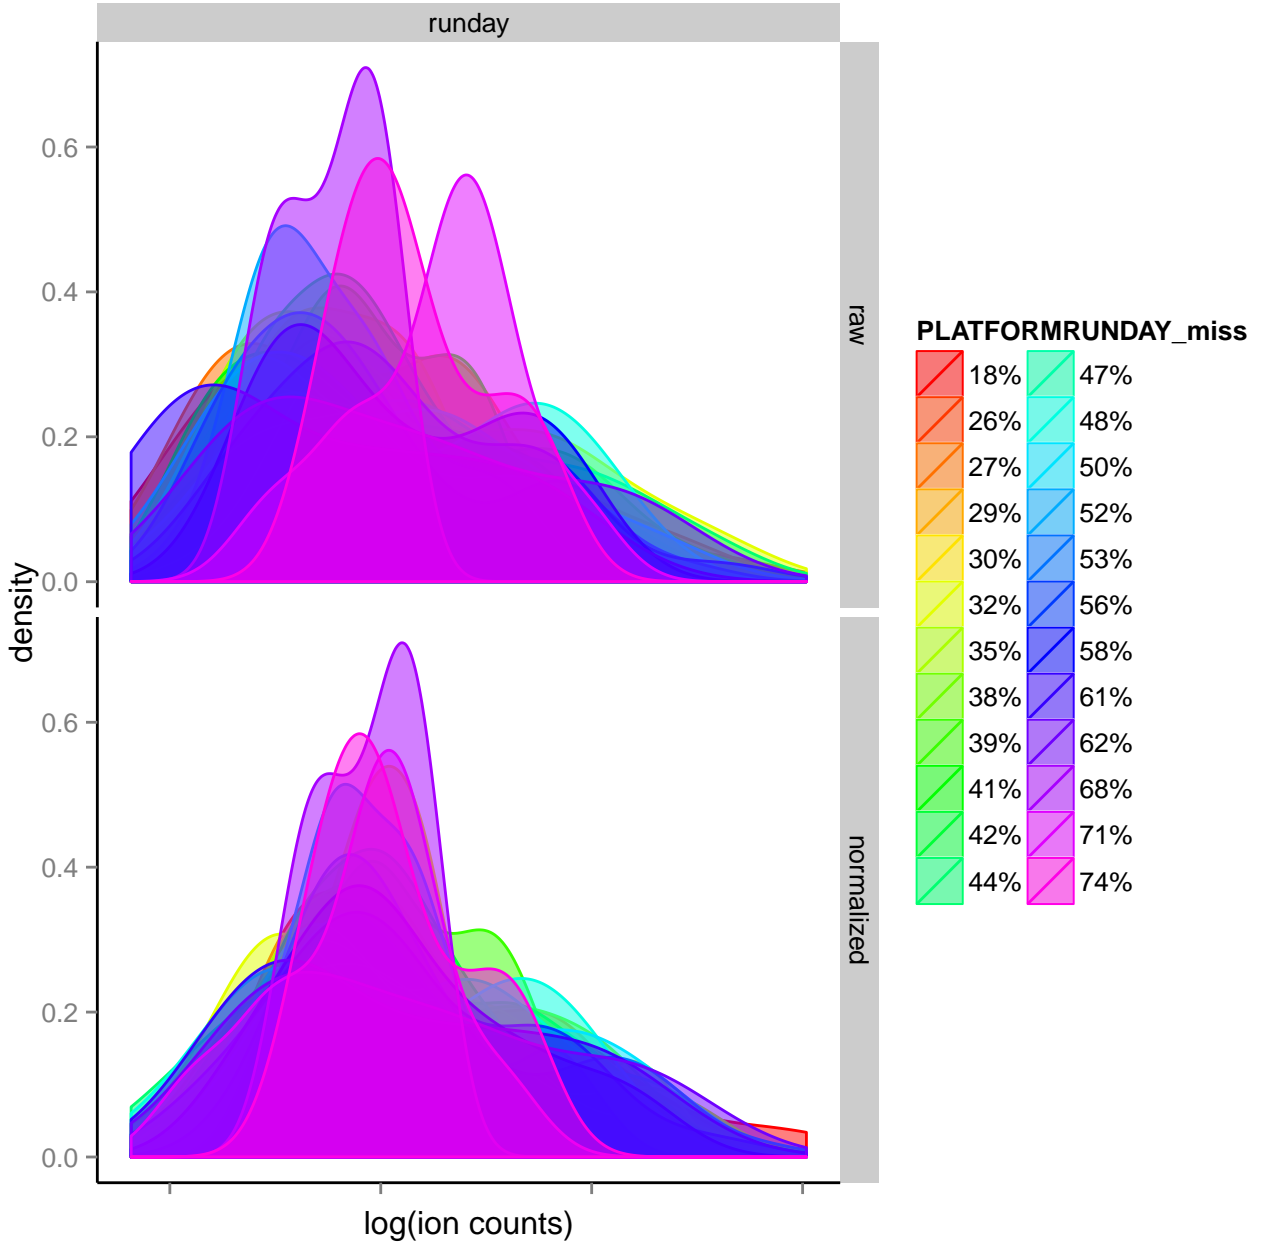

# X-11858

runday

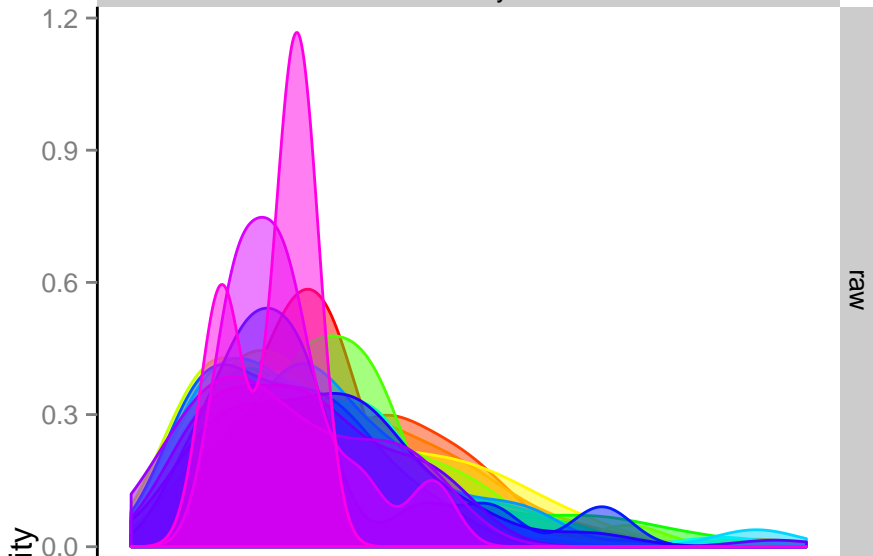

raw

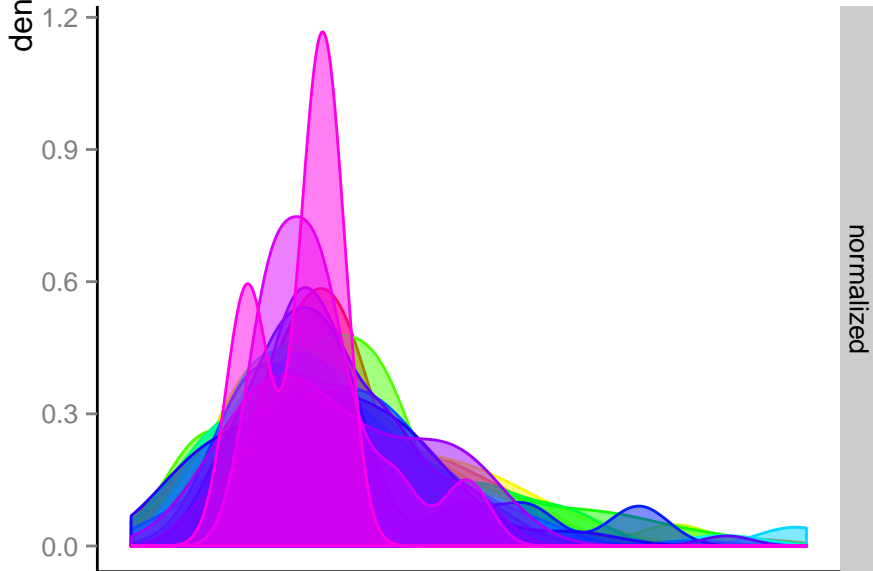

normalized

## PLATFORMRUNDAY\_miss

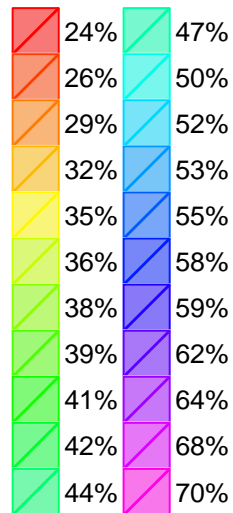

# X-11859

runday

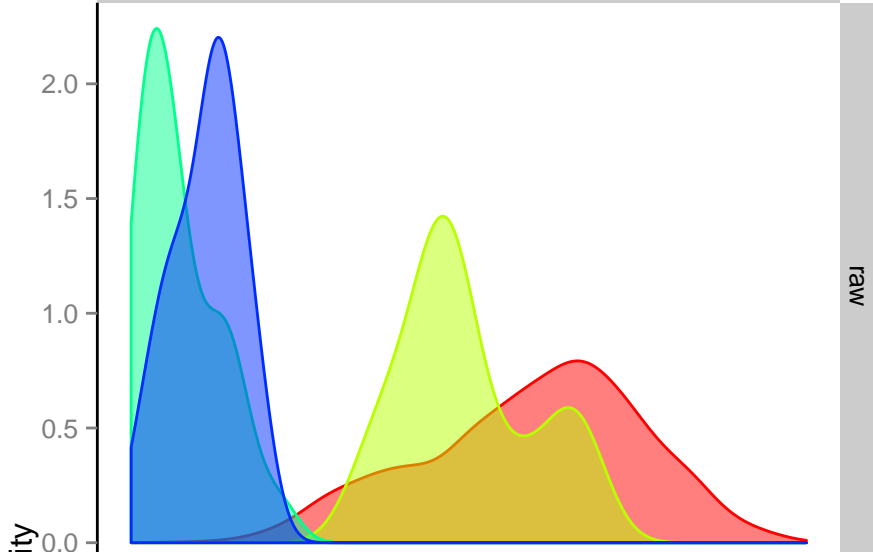

raw

## PLATFORMRUNDAY\_miss

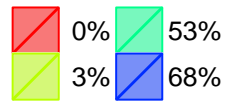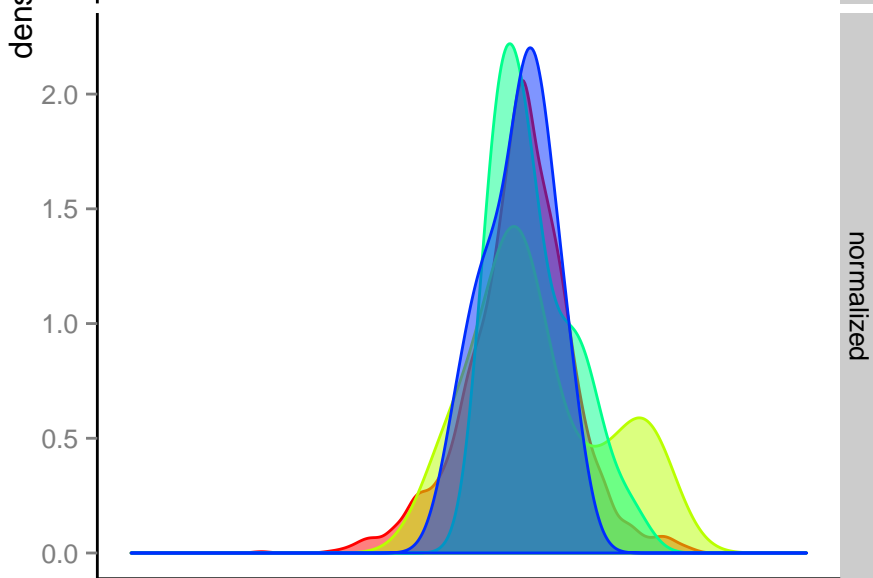

normalized

log(ion counts)

# X-11876

runday

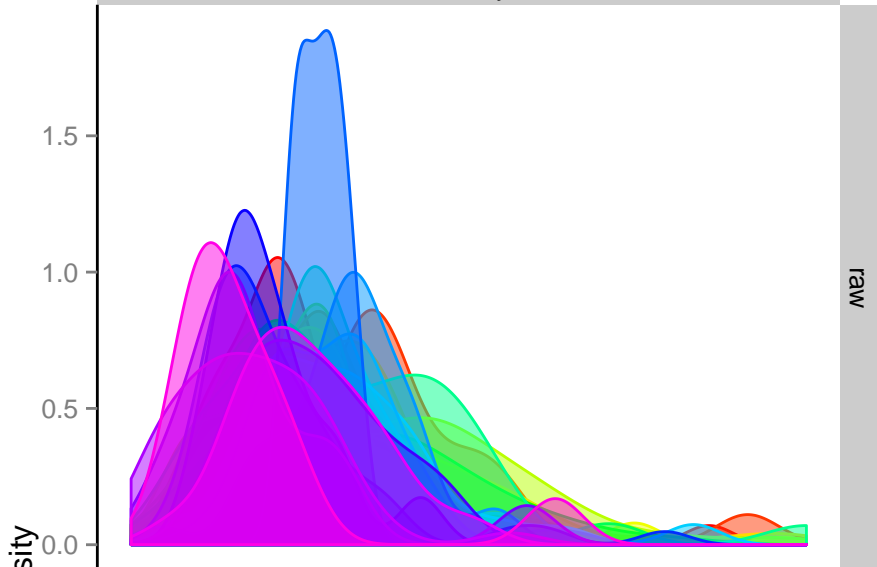

raw

## PLATFORMRUNDAY\_miss

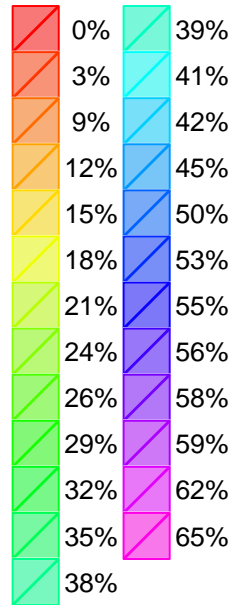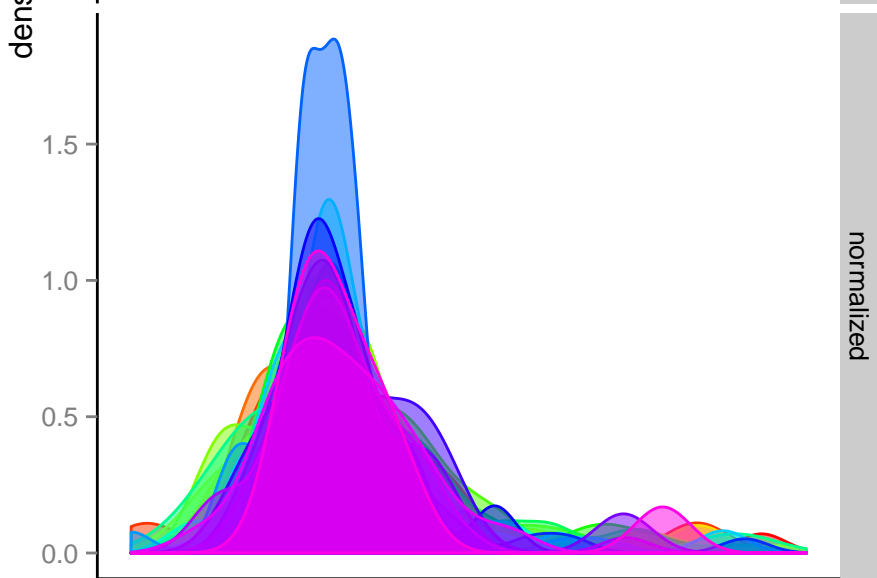

normalized

log(ion counts)

# X-11880

runday

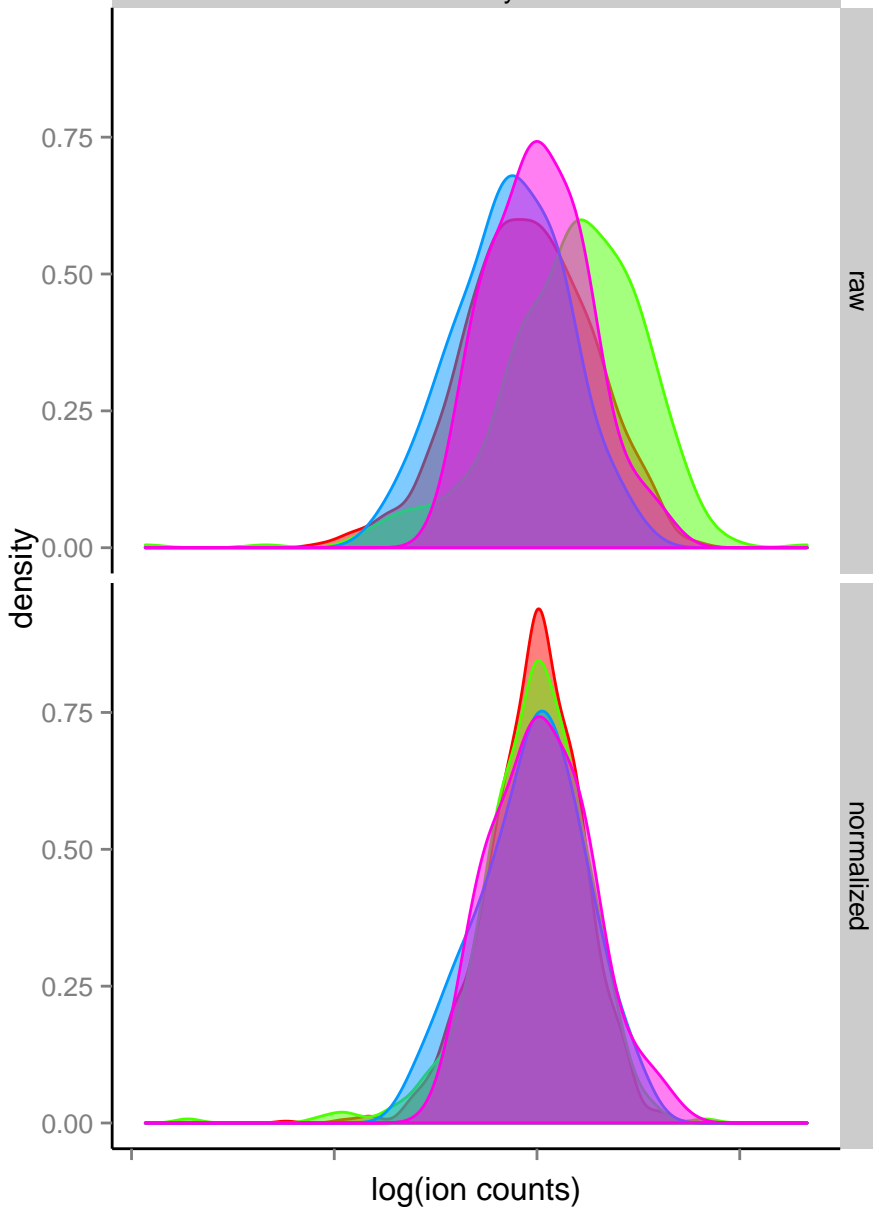

**PLATFORMRUNDAY\_miss**





# X-11905

runday

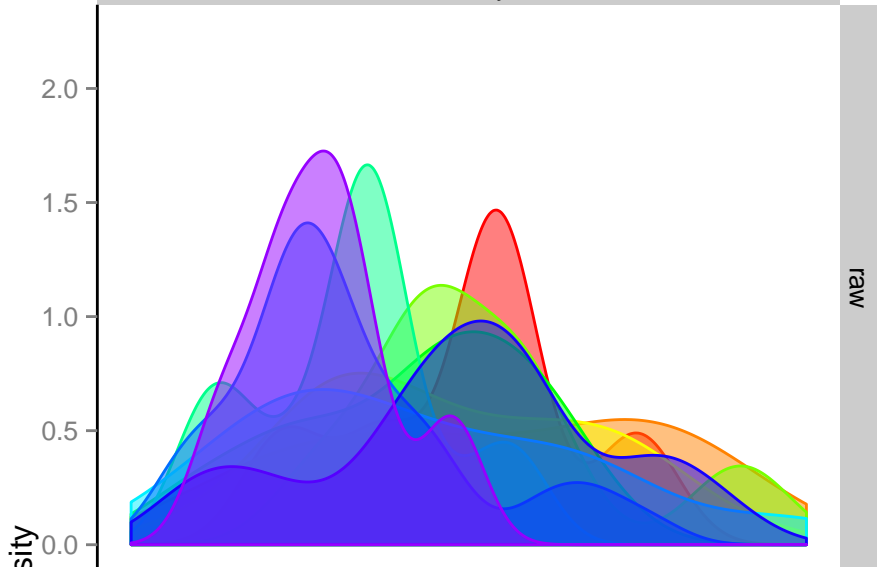

raw

## PLATFORMRUNDAY\_miss

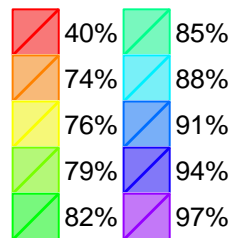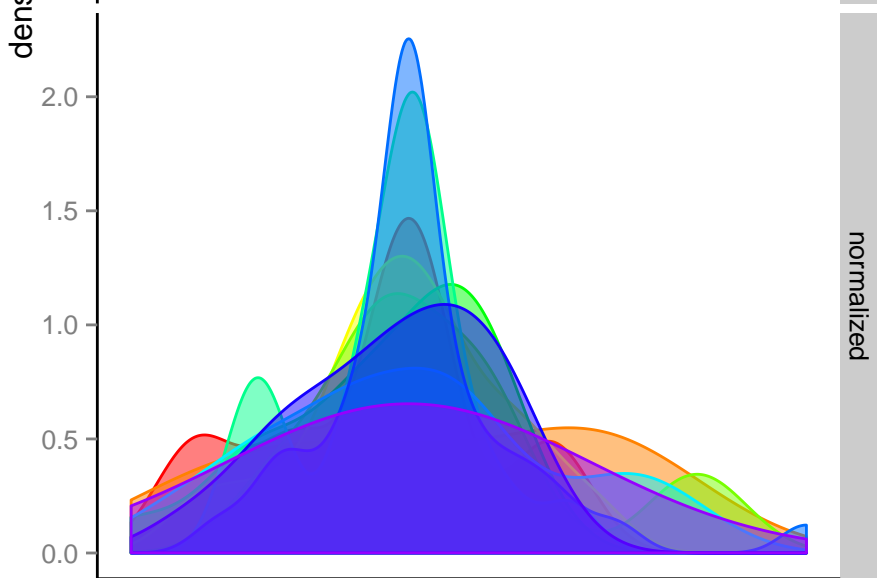

normalized

log(ion counts)

# X-12007

runday

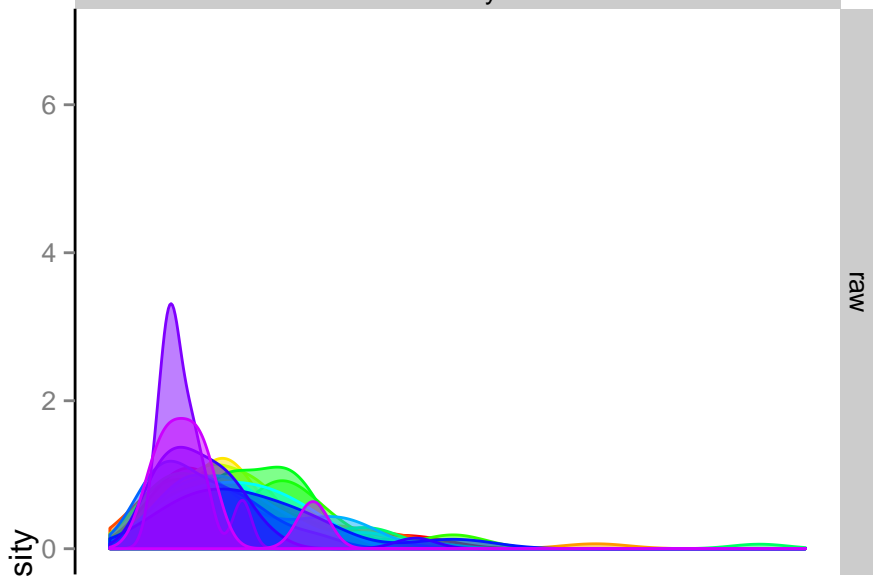

raw

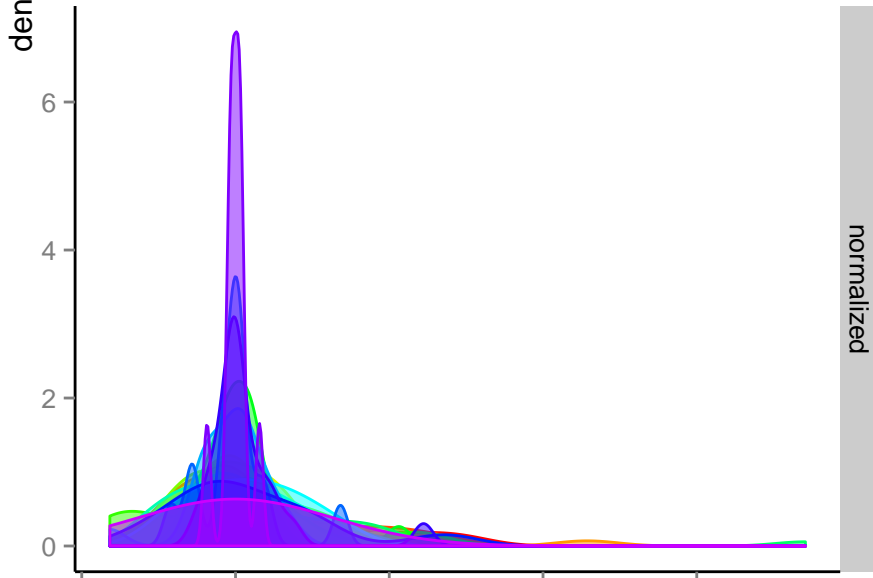

normalized

## PLATFORMRUNDAY\_miss

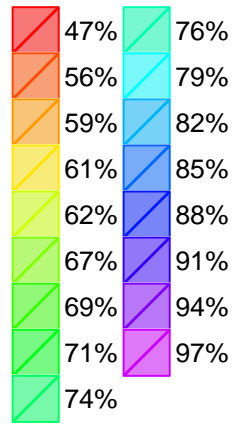

log(ion counts)

# X-12013

runday

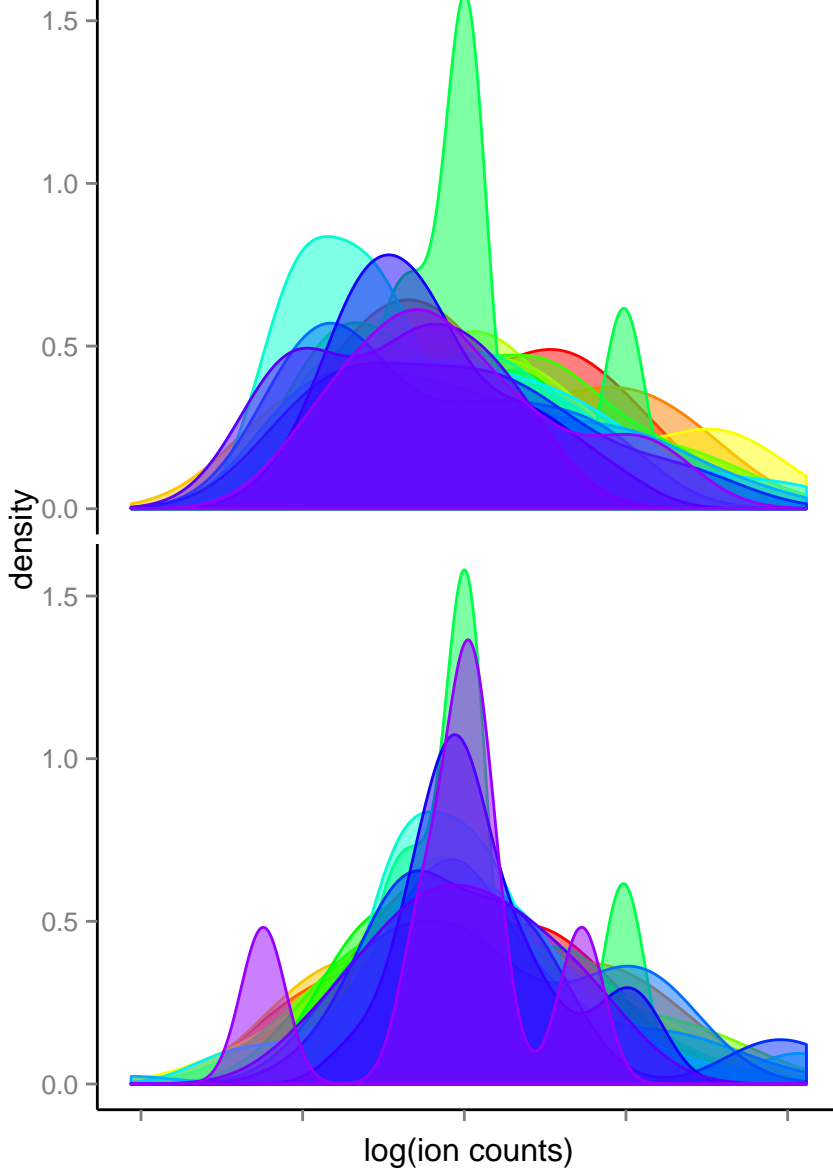

# X-12029

runday

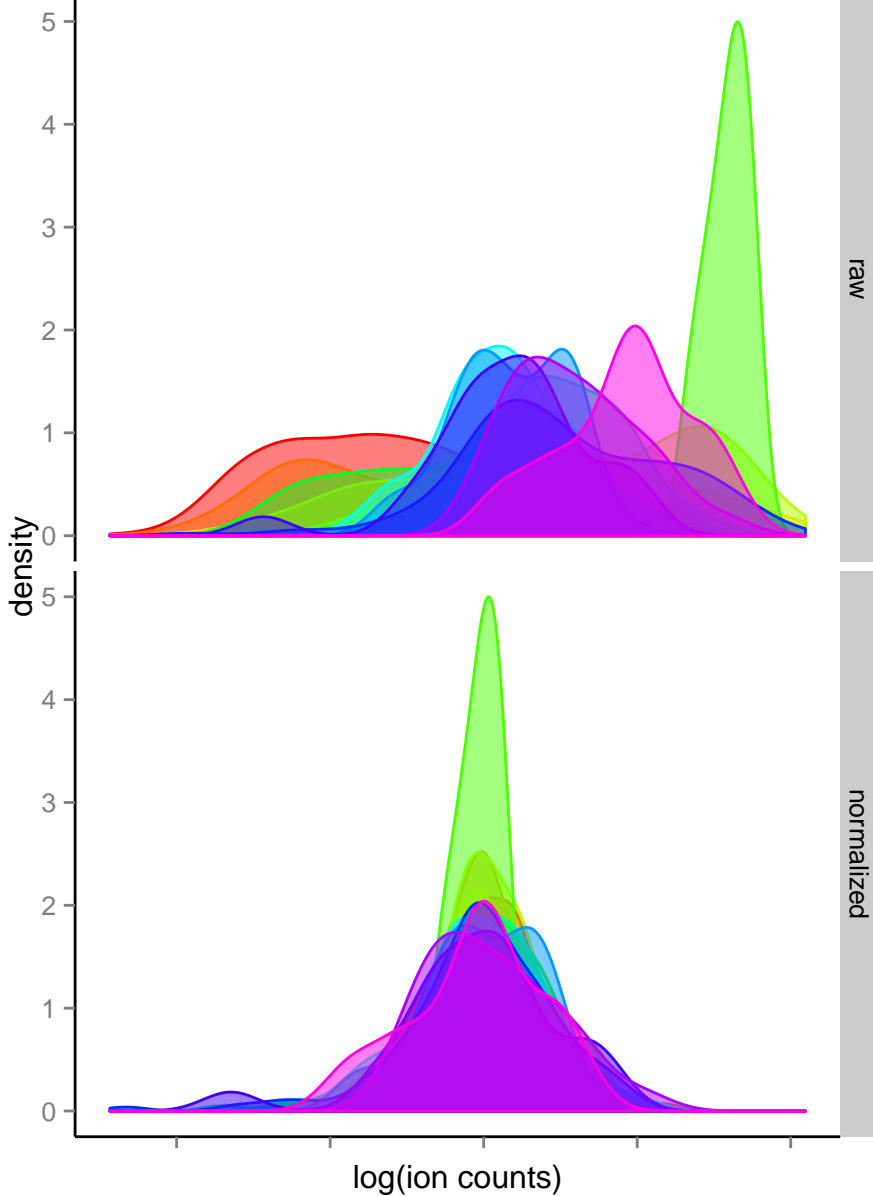

## PLATFORMRUNDAY\_miss

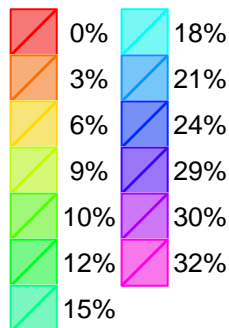

# X-12038

runday

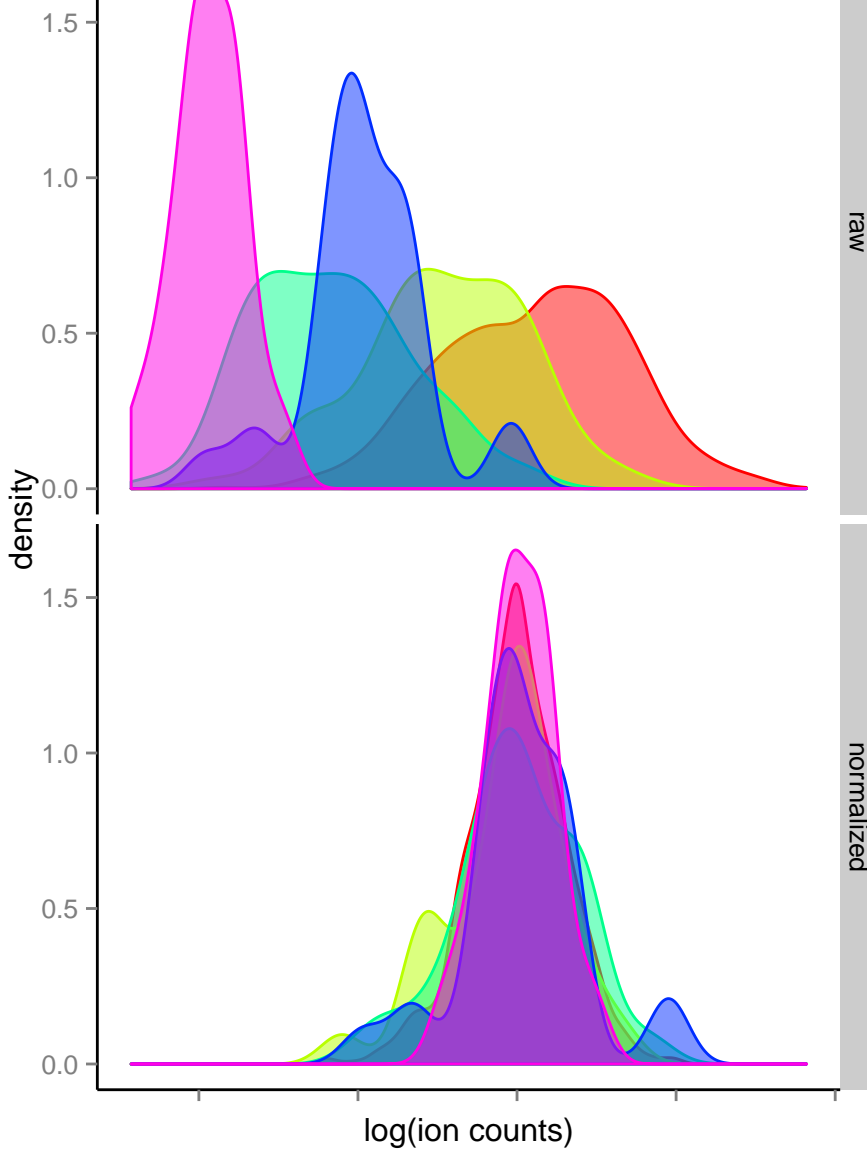

**PLATFORMRUNDAY\_miss**

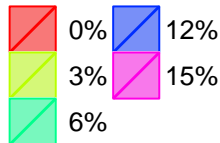

# X-12039

runday

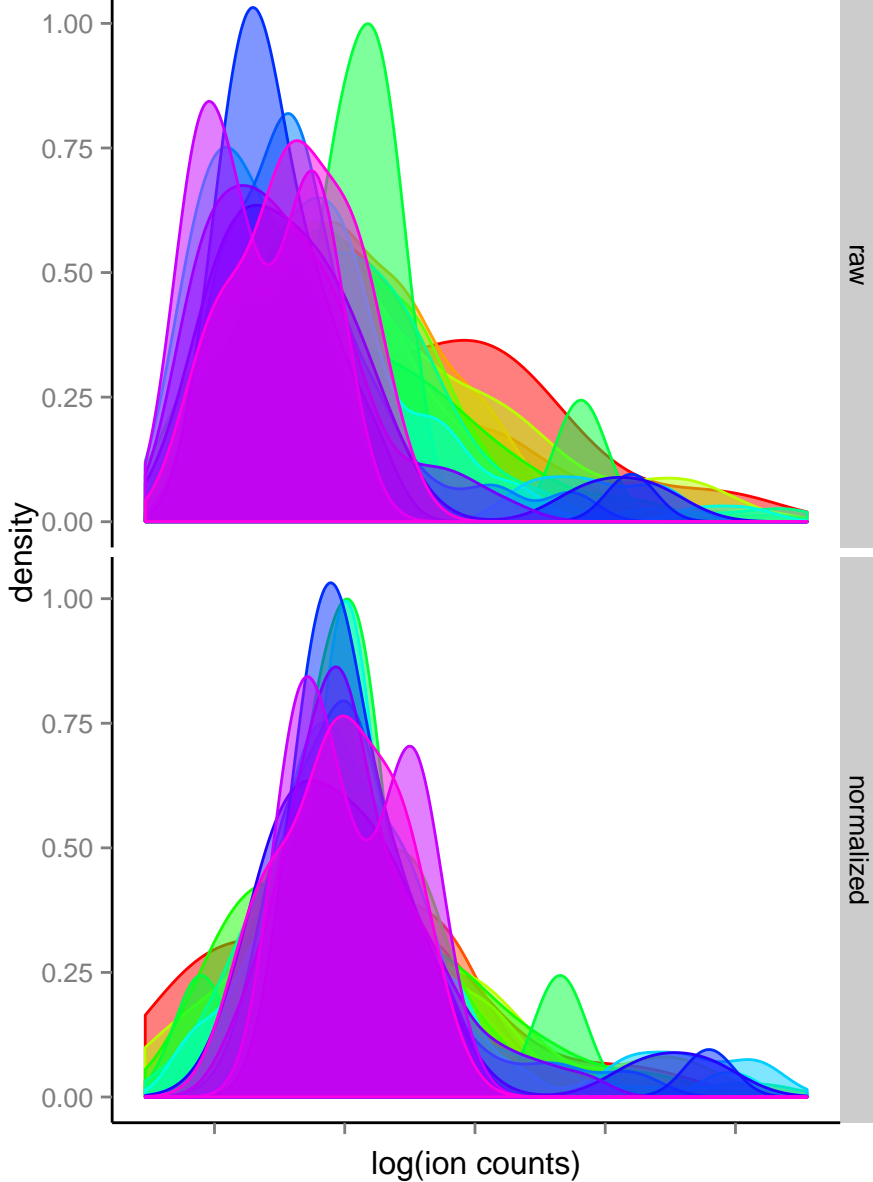

## PLATFORMRUNDAY\_miss

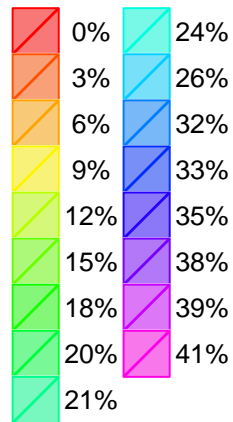

# X-12040

runday

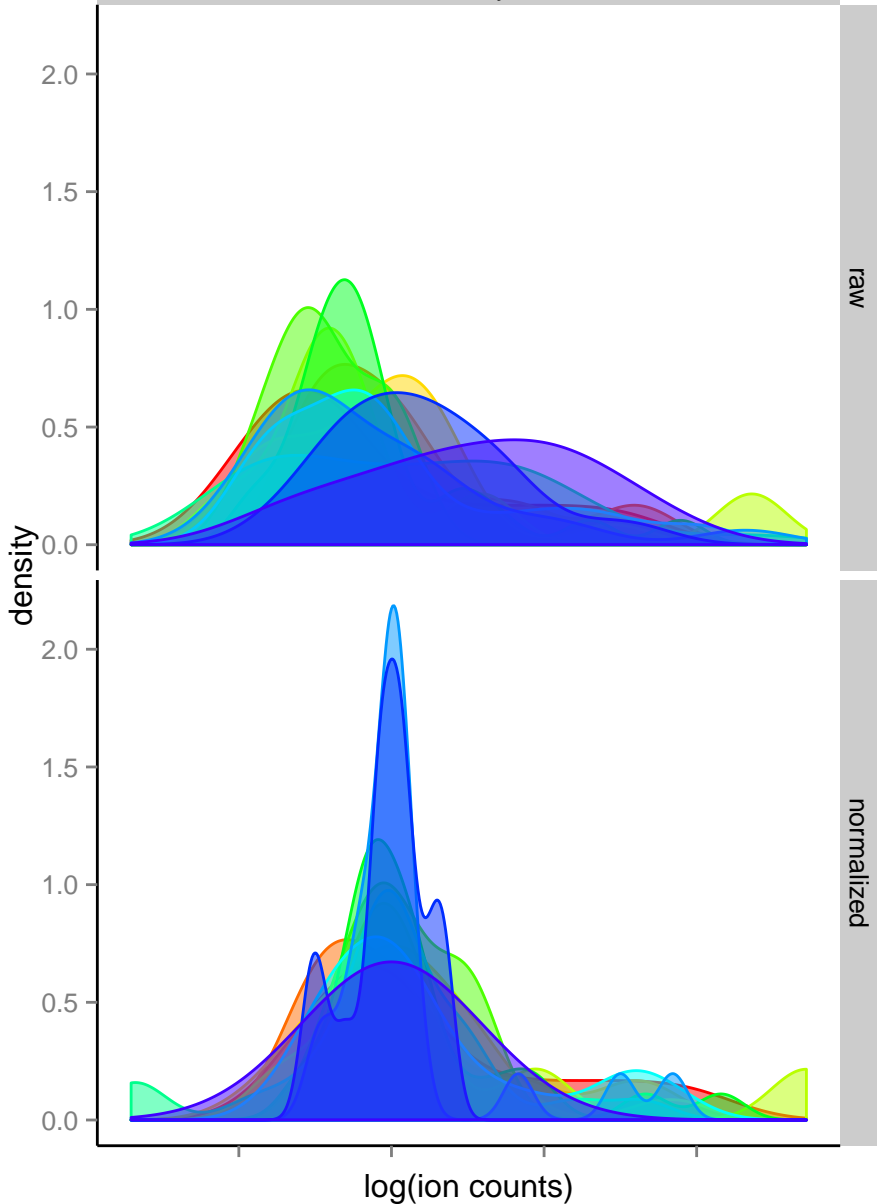

raw

normalized

## PLATFORMRUNDAY\_miss

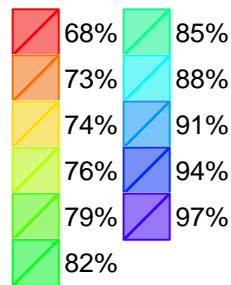

# X-12056

runday

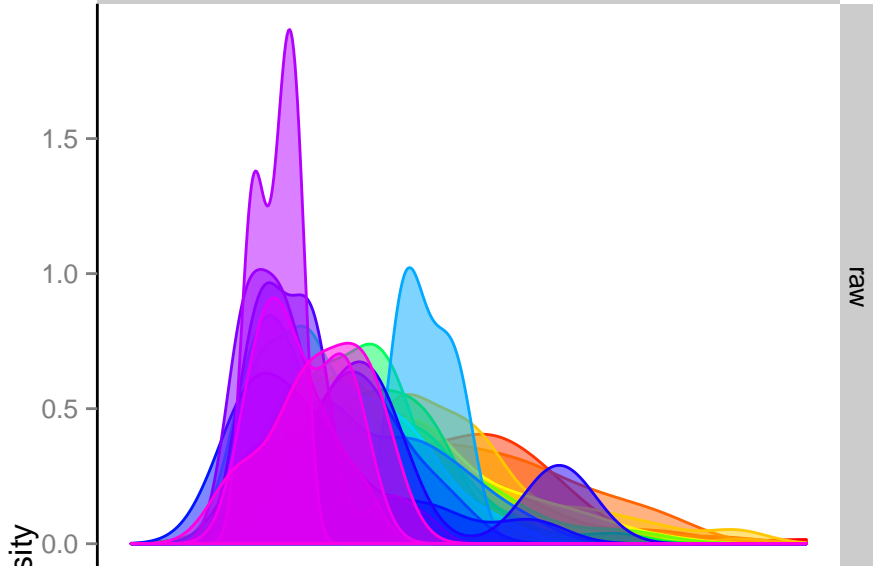

raw

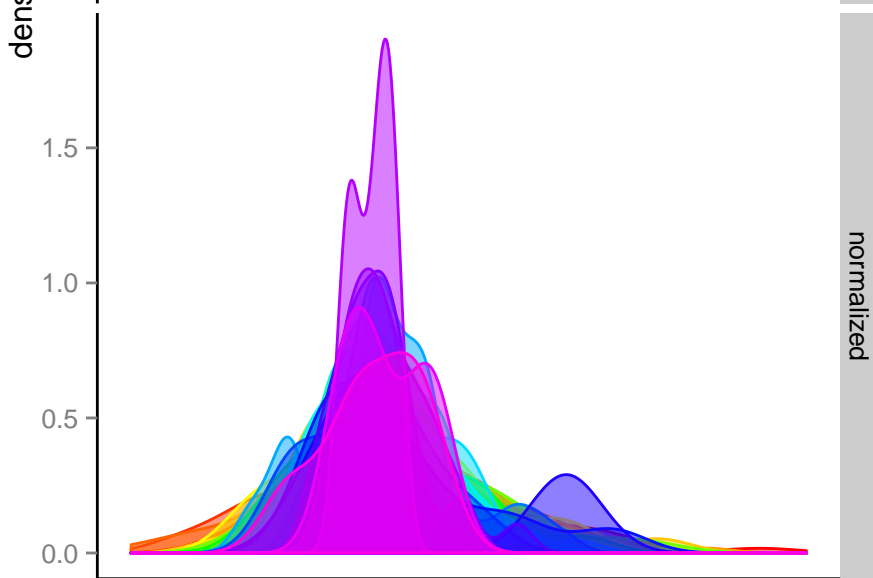

normalized

## PLATFORMRUNDAY\_miss

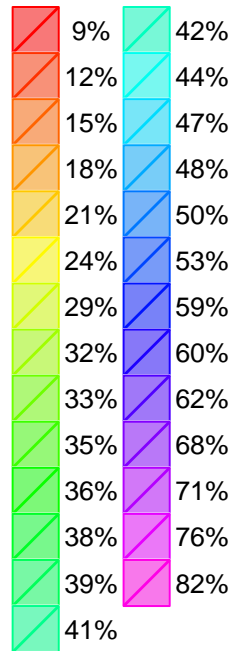

log(ion counts)



# X-12063

runday

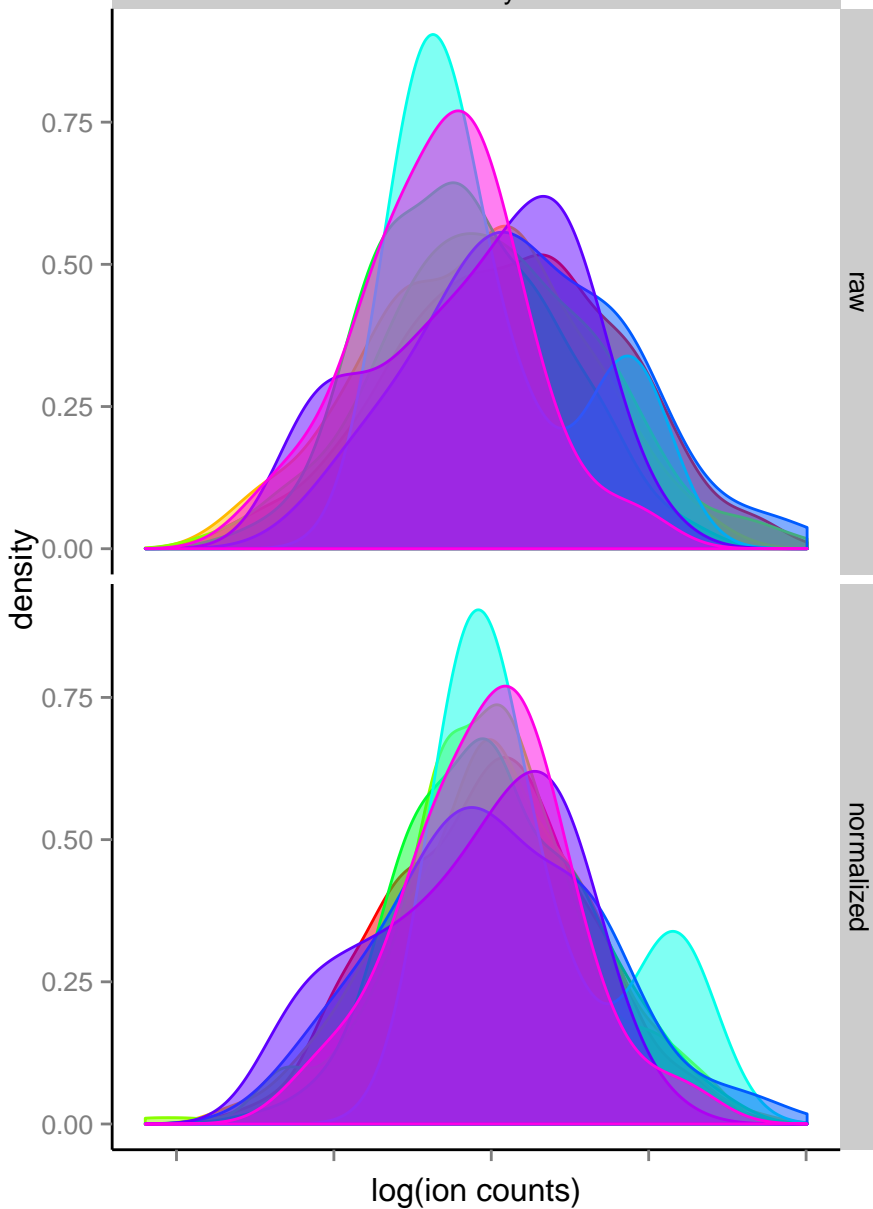

## PLATFORMRUNDAY\_miss

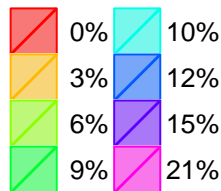

# X-12092

runday

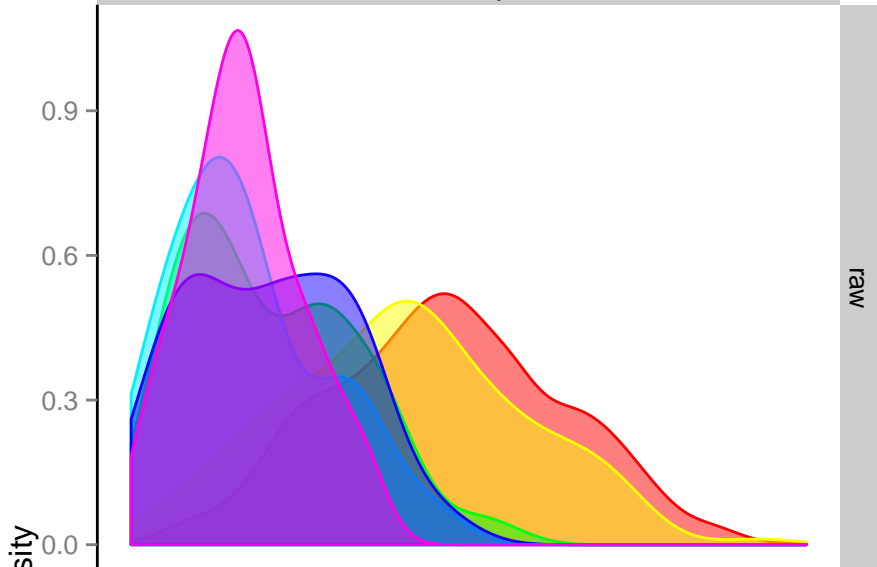

raw

## PLATFORMRUNDAY\_miss

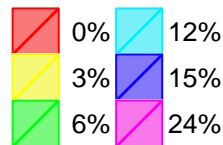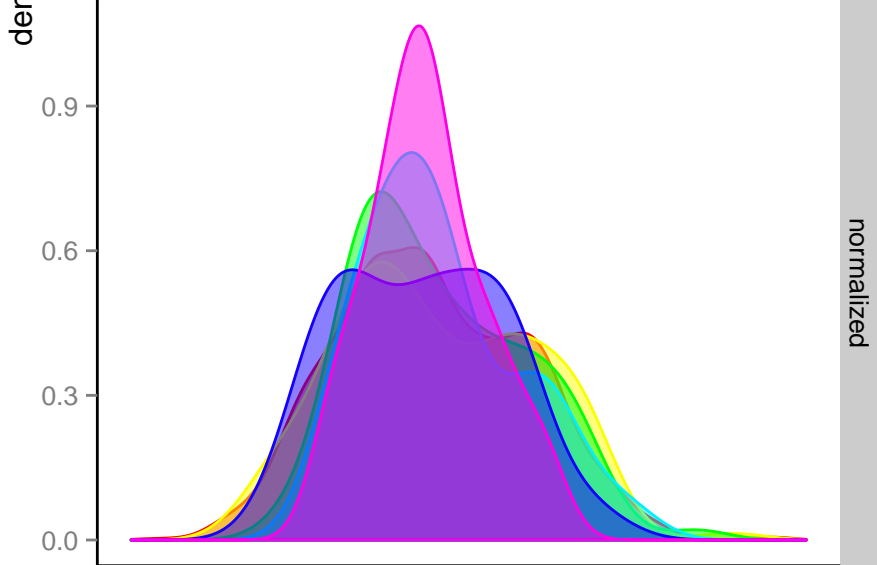

normalized

log(ion counts)

# X-12093

runday

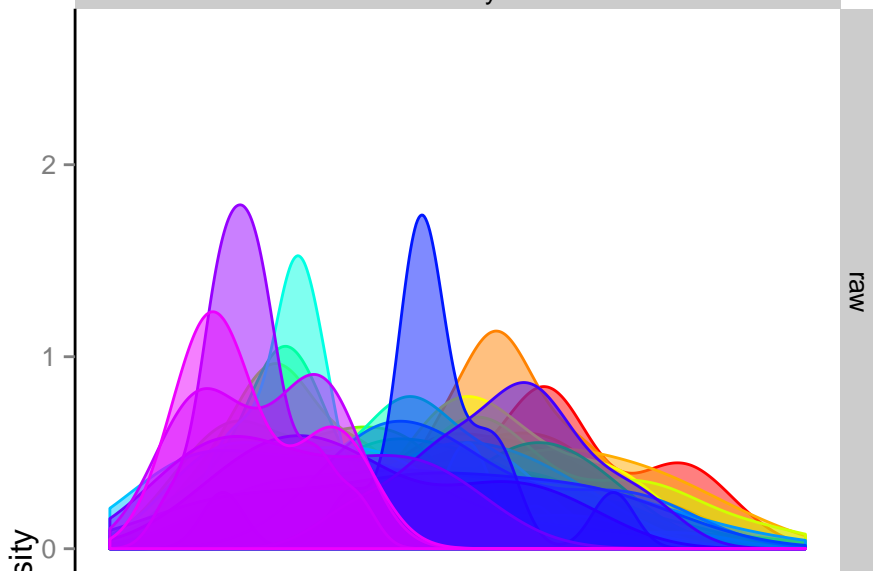

raw

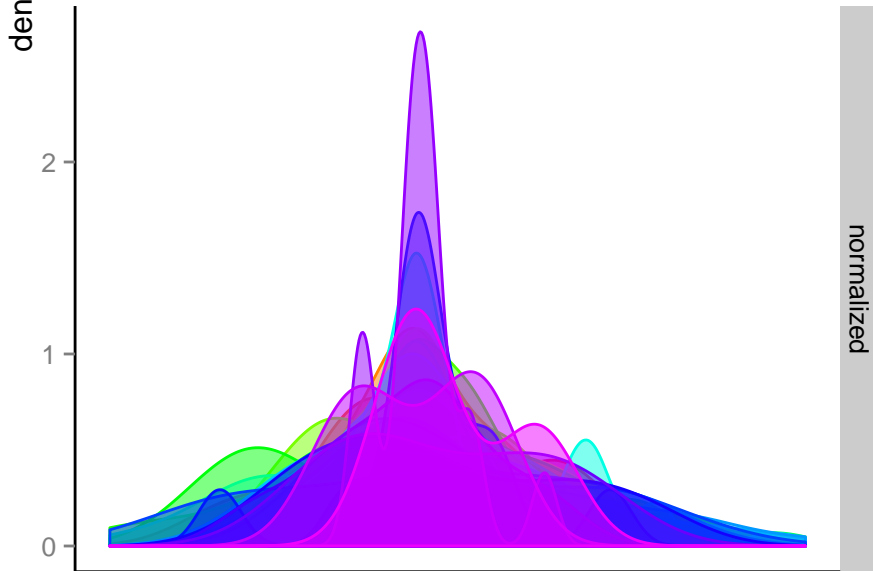

normalized

## PLATFORMRUNDAY\_miss

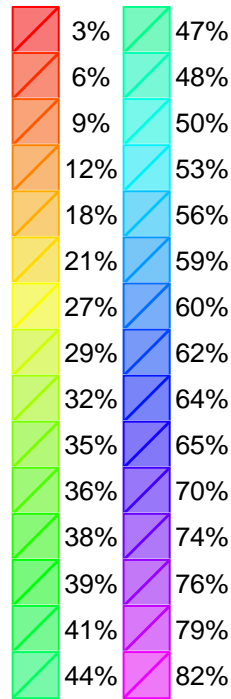

log(ion counts)

# X-12094

runday

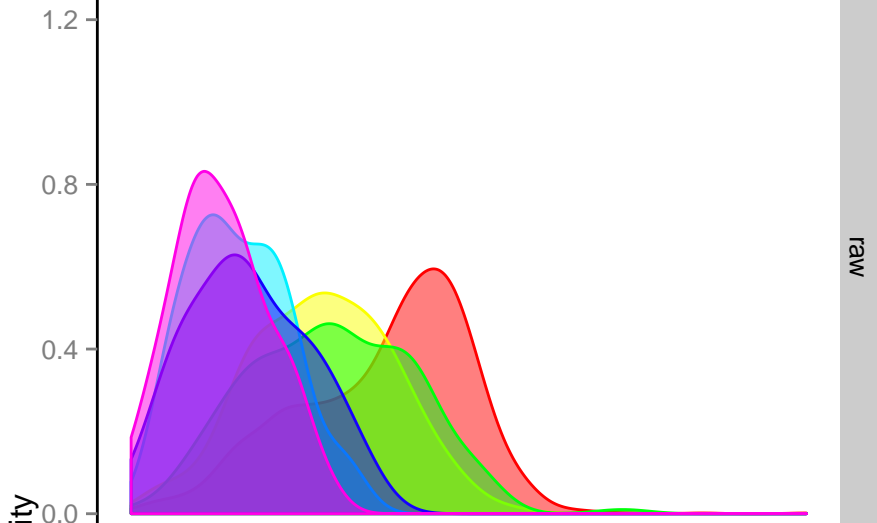

raw

**PLATFORMRUNDAY\_miss**

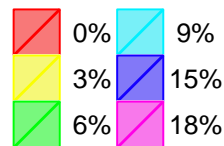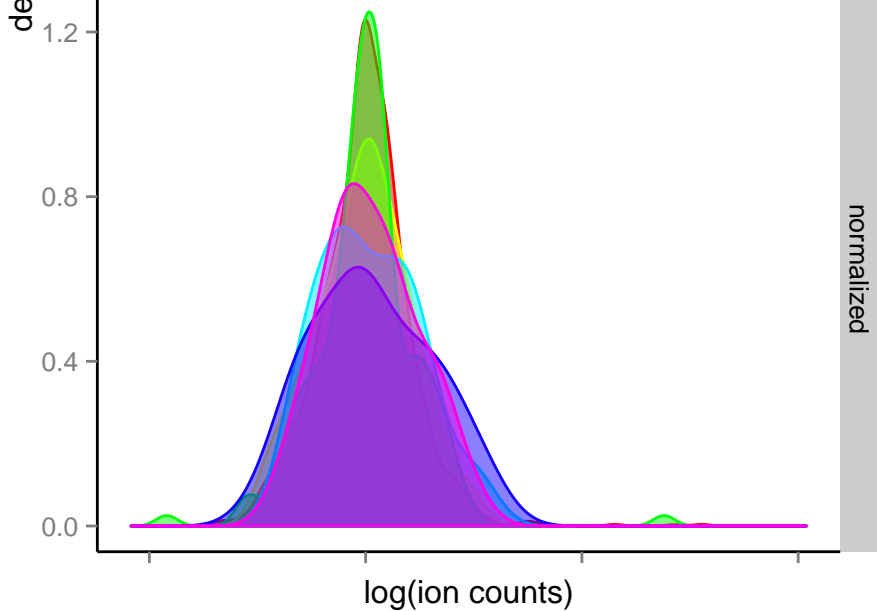

normalized

# N1-methyl-3-pyridone-4-carboxamide

runday

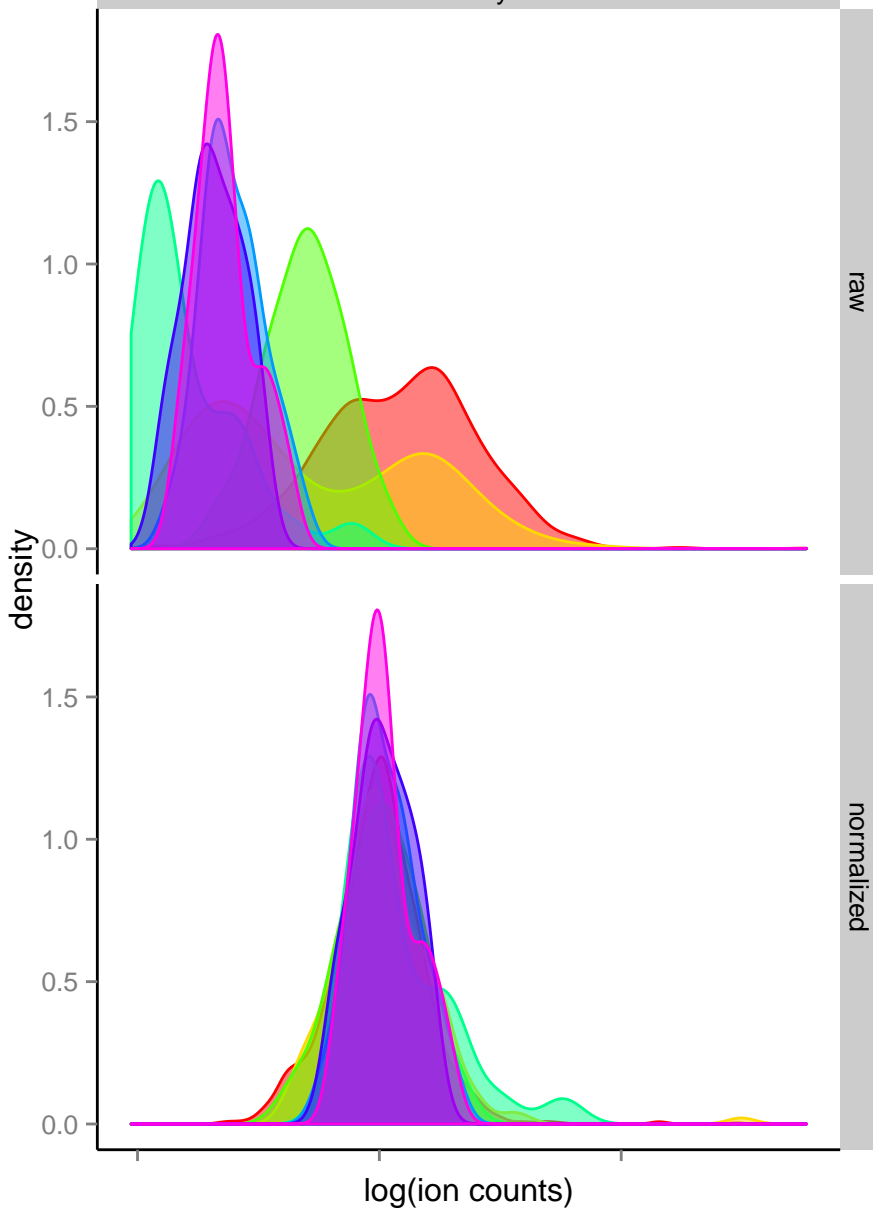

## PLATFORMRUNDAY\_miss

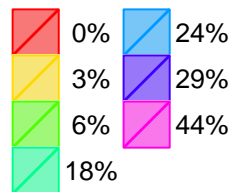

# hydroxytryptophane\*

runday

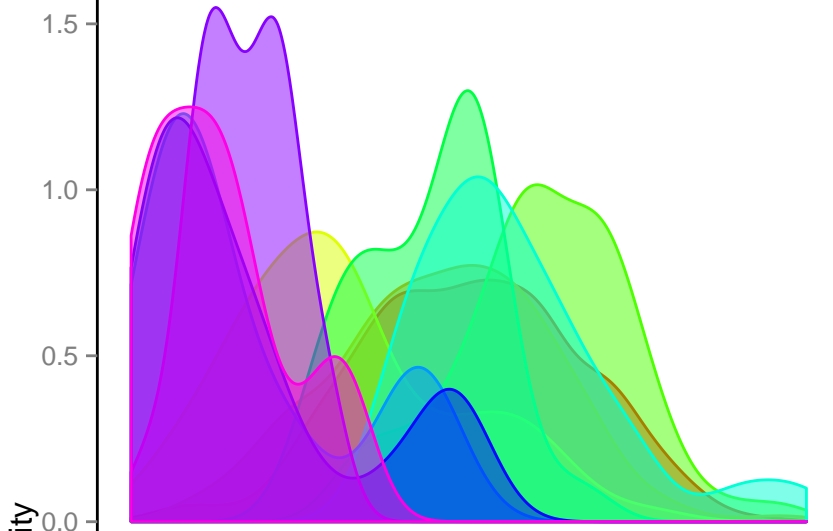

raw

## PLATFORMRUNDAY\_miss

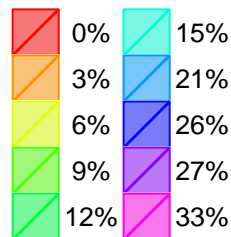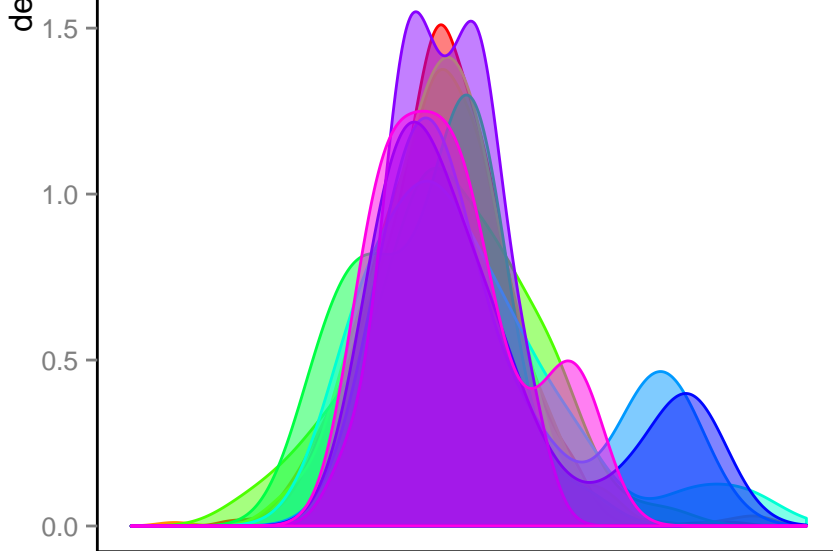

normalized

log(ion counts)

# X-12116

runday

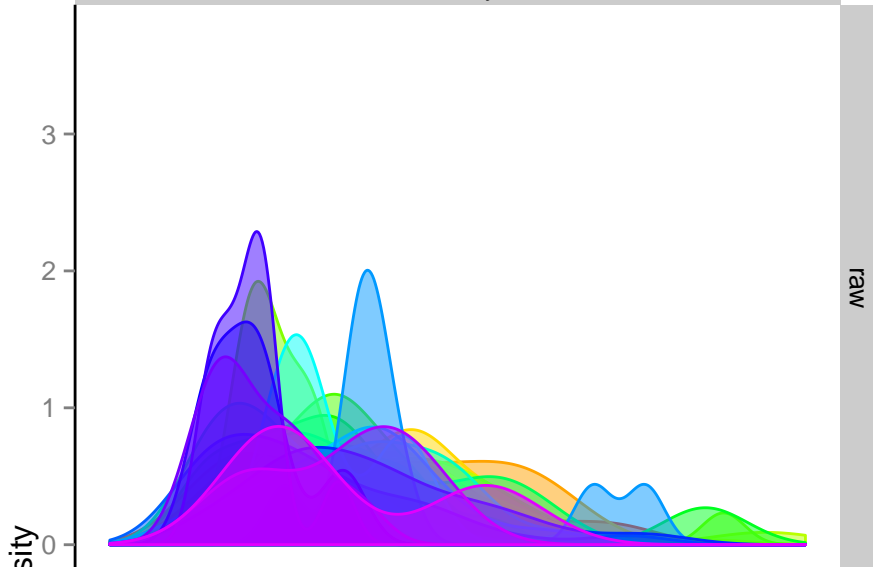

raw

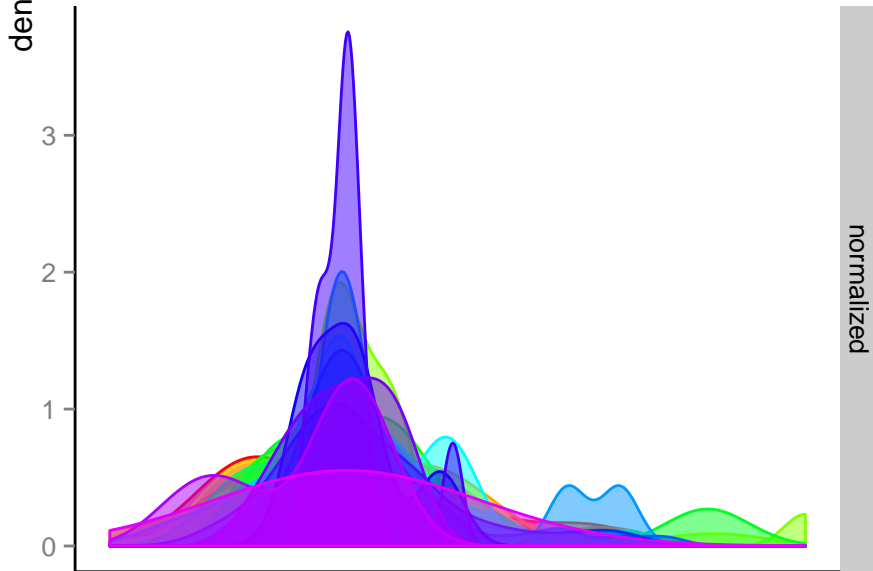

normalized

## PLATFORMRUNDAY\_miss

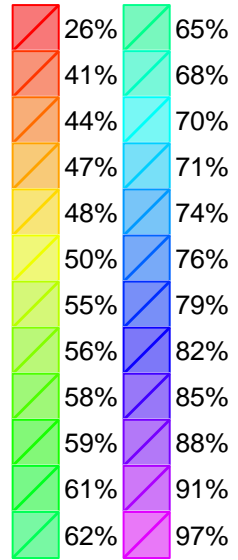

log(ion counts)

# X-12188

runday

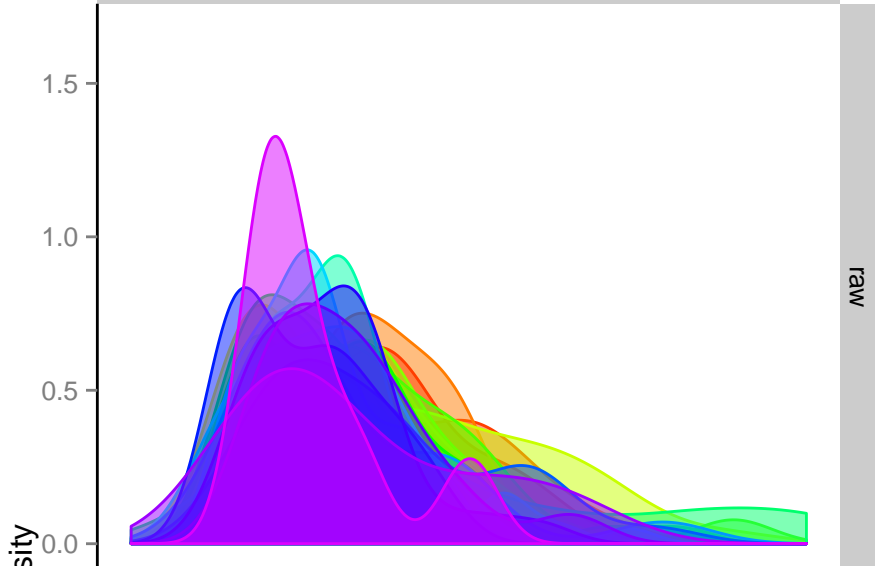

raw

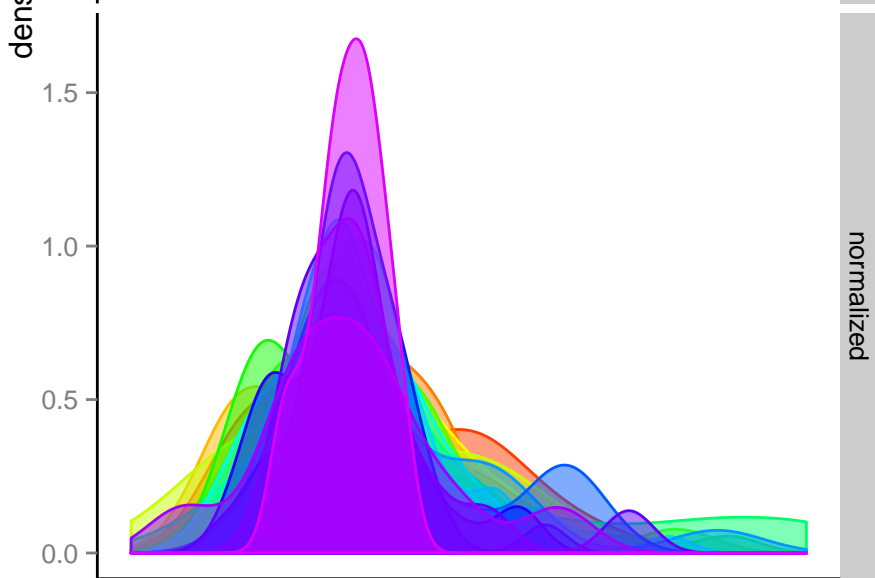

normalized

## PLATFORMRUNDAY\_miss

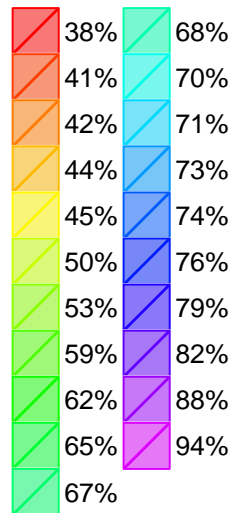

log(ion counts)



# X-12189

runday

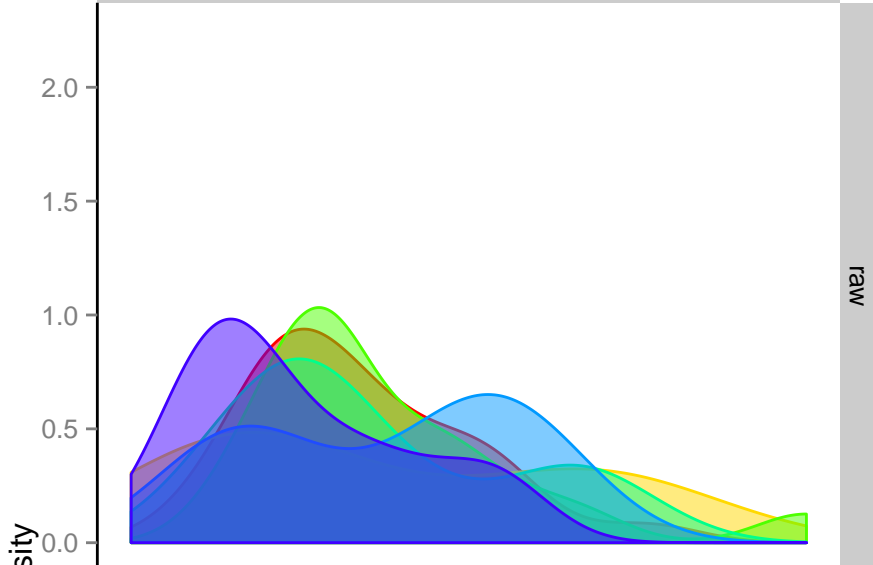

raw

## PLATFORMRUNDAY\_miss

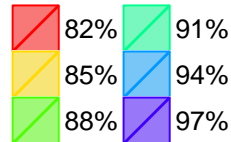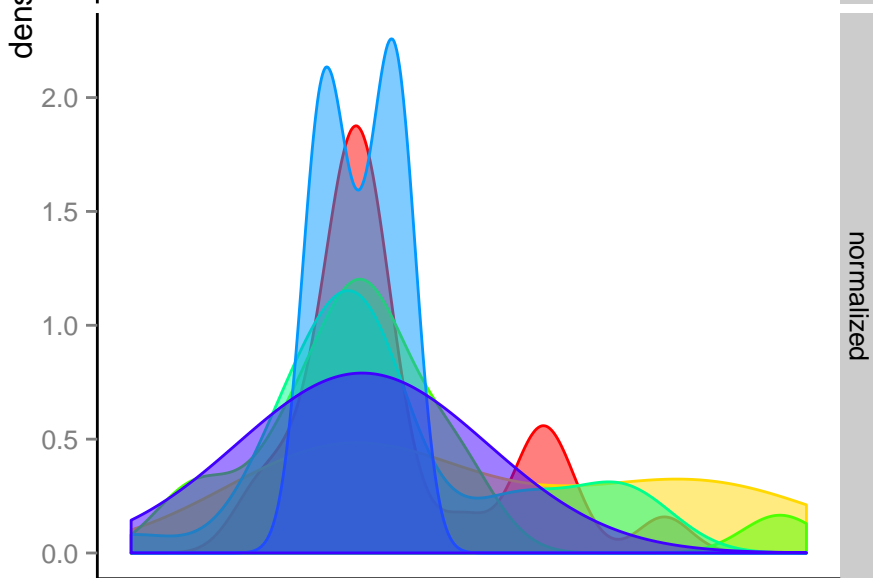

normalized

log(ion counts)

# X-12206

runday

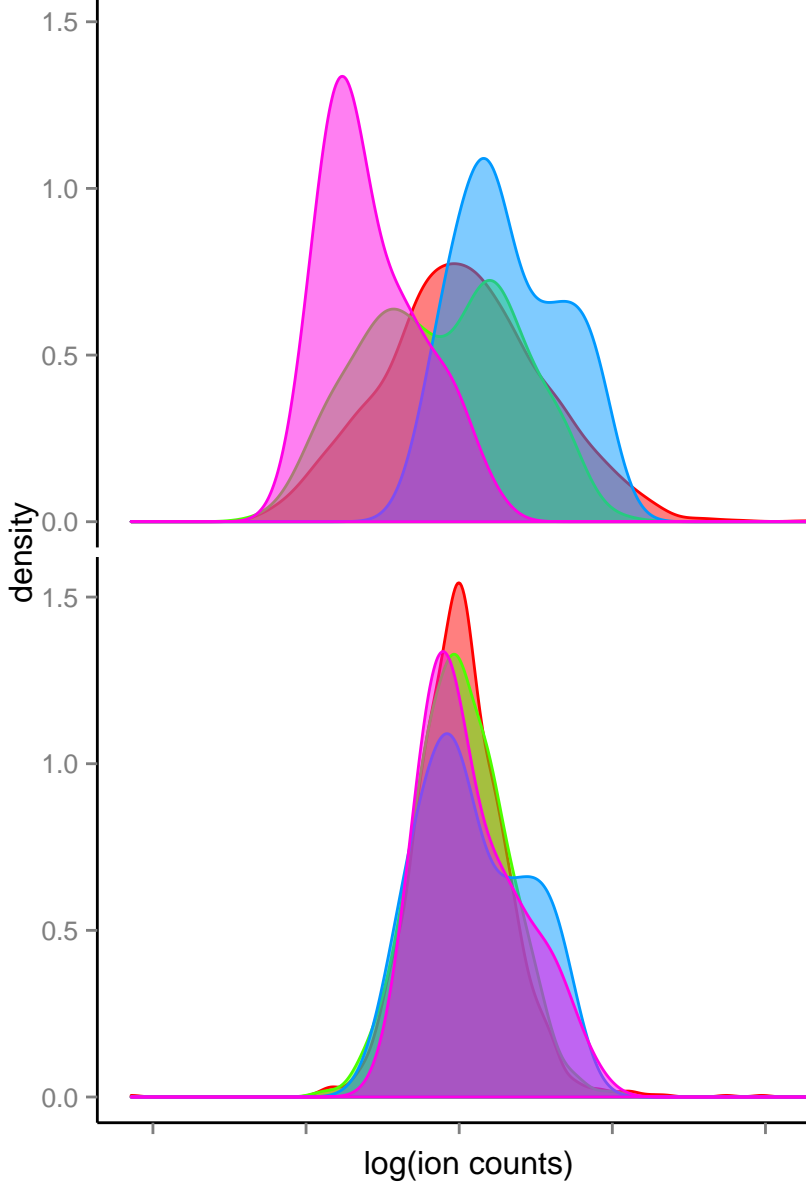

raw

normalized

**PLATFORMRUNDAY\_miss**

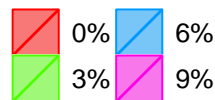

# X-12212

runday

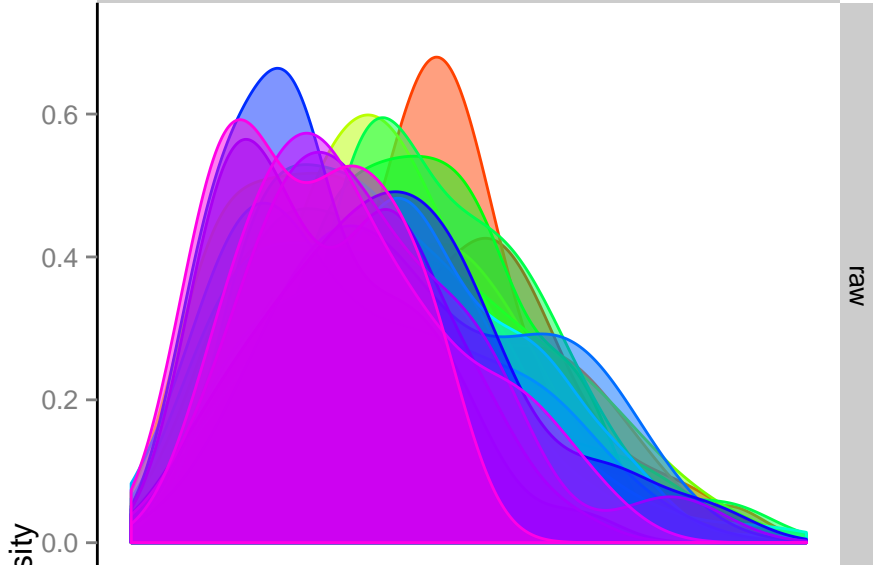

raw

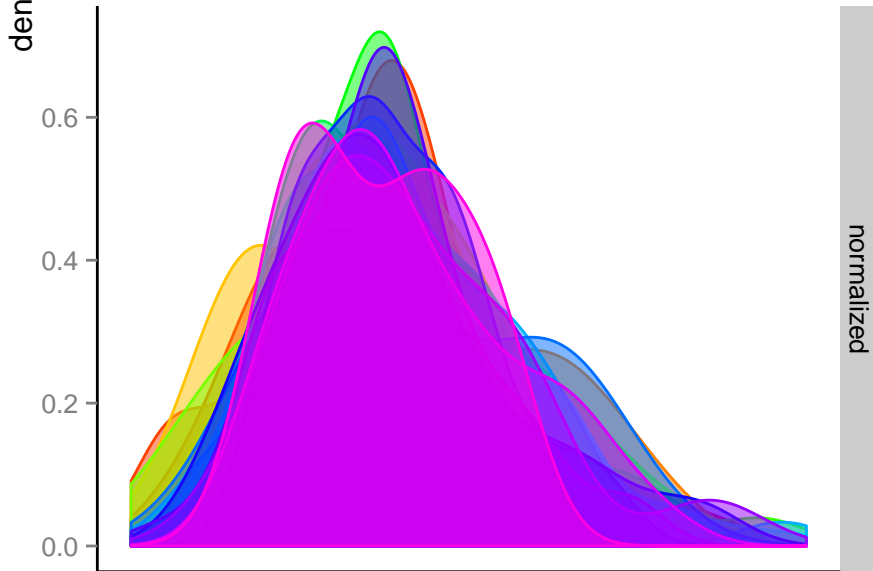

normalized

## PLATFORMRUNDAY\_miss

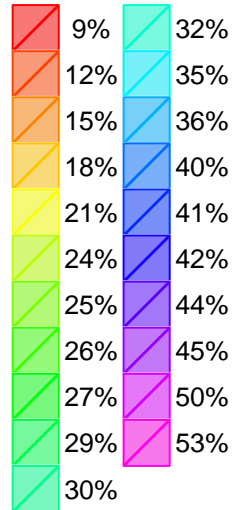

log(ion counts)

# X-12216

runday

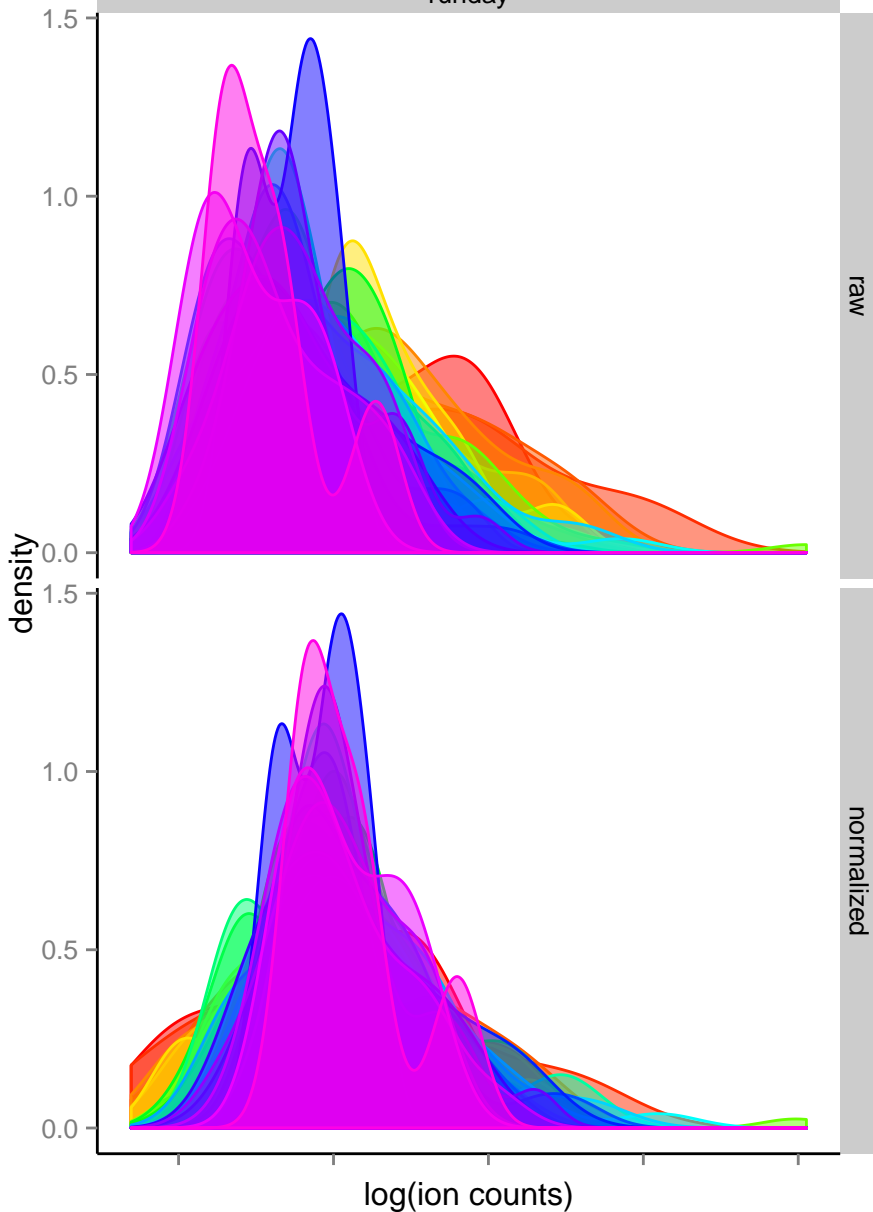

## PLATFORMRUNDAY\_miss

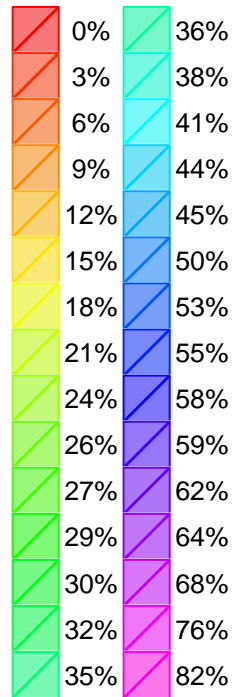

# X-12217

runday

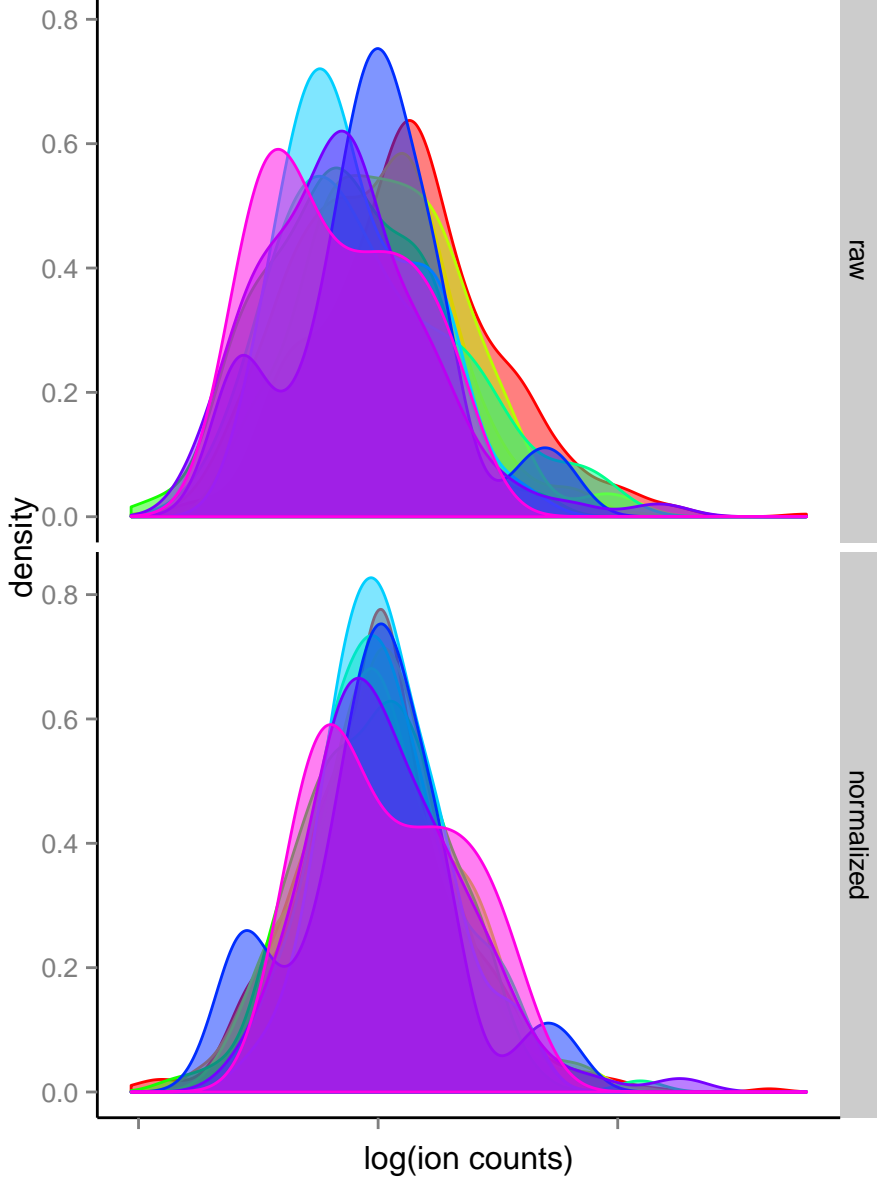

**PLATFORMRUNDAY\_miss**

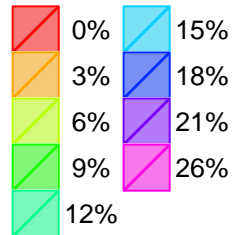

# X-12230

runday

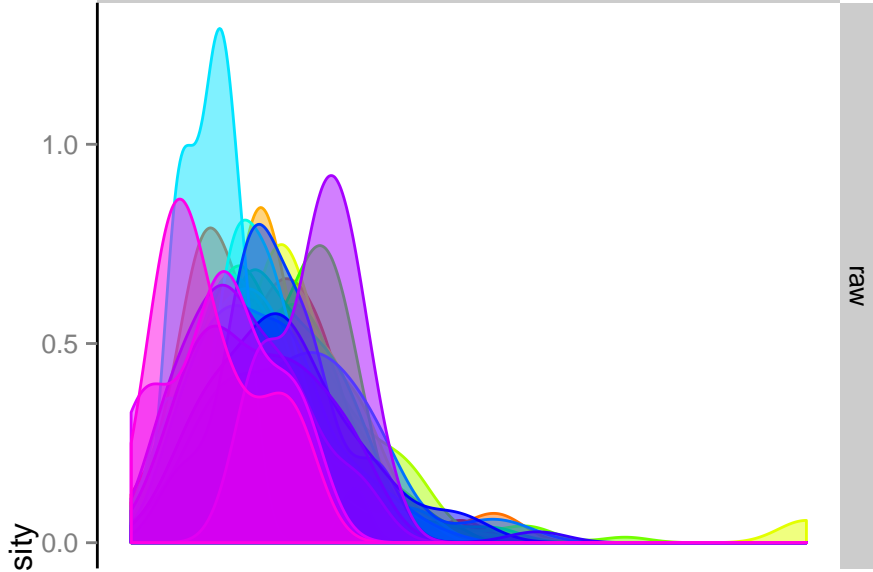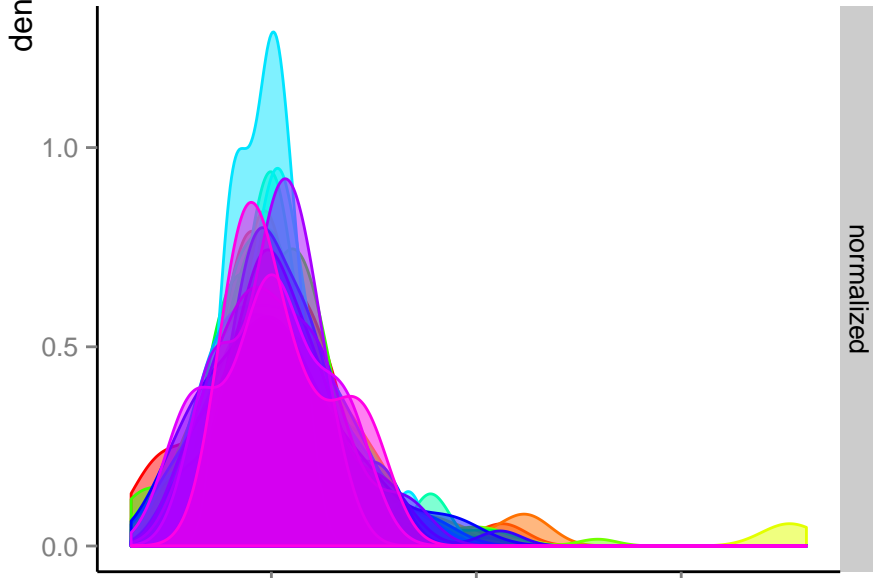

**PLATFORMRUNDAY\_miss**

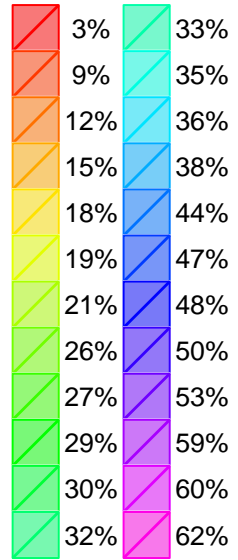

log(ion counts)

# X-12231

runday

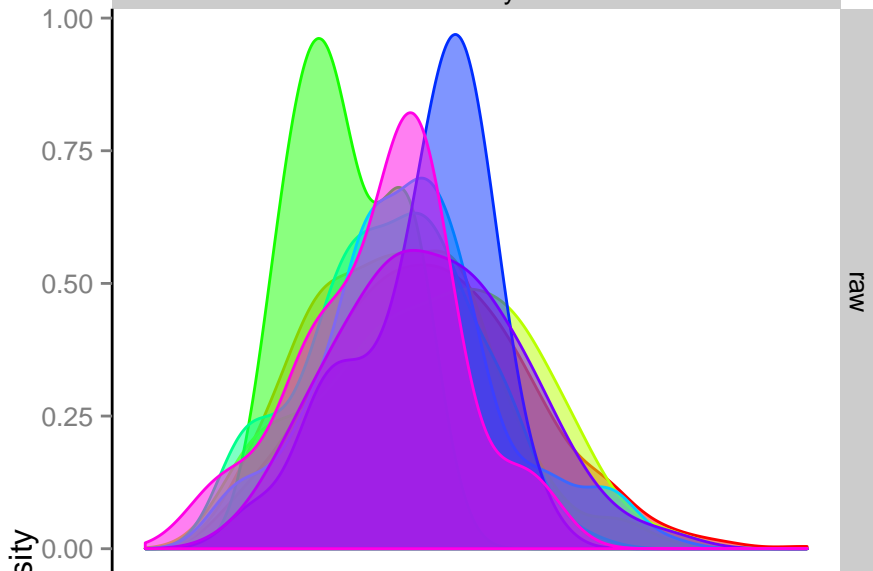

raw

## PLATFORMRUNDAY\_miss

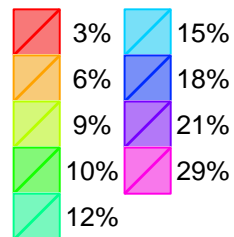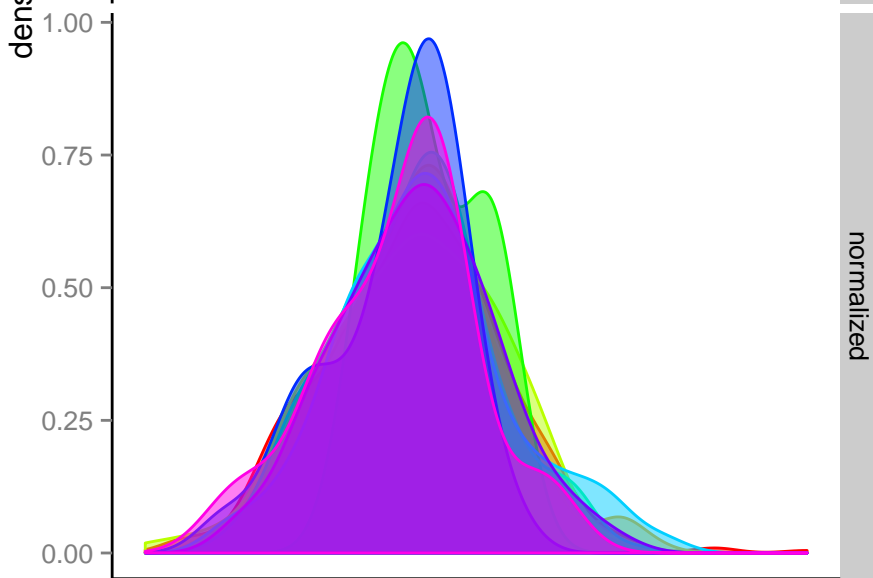

normalized

log(ion counts)

X-12236

runday

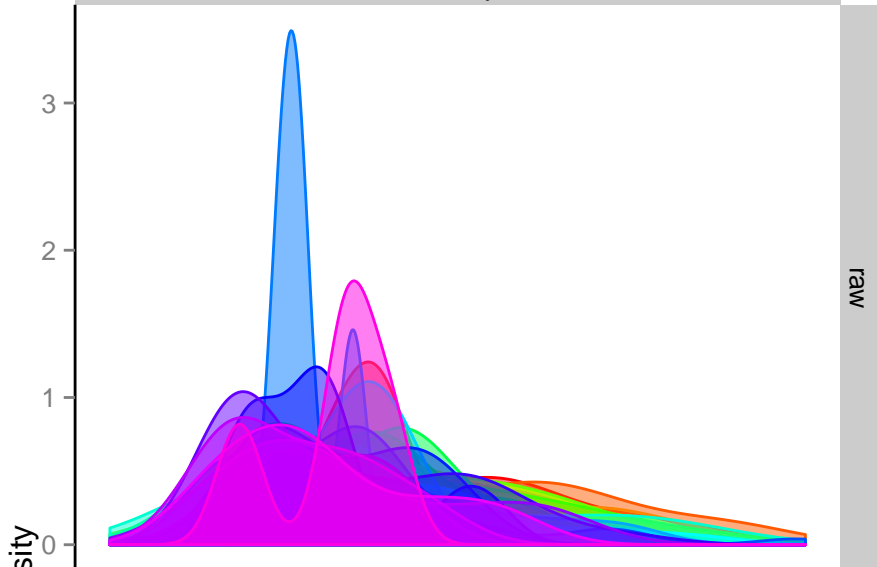

raw

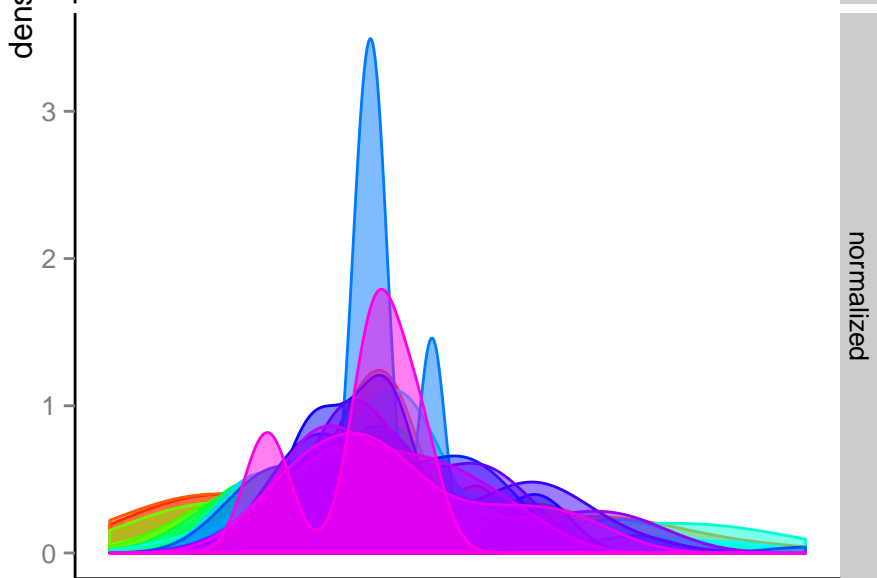

normalized

log(ion counts)

PLATFORMRUNDAY\_miss

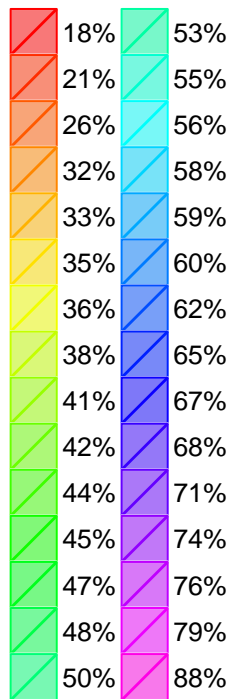



# X-12244

runday

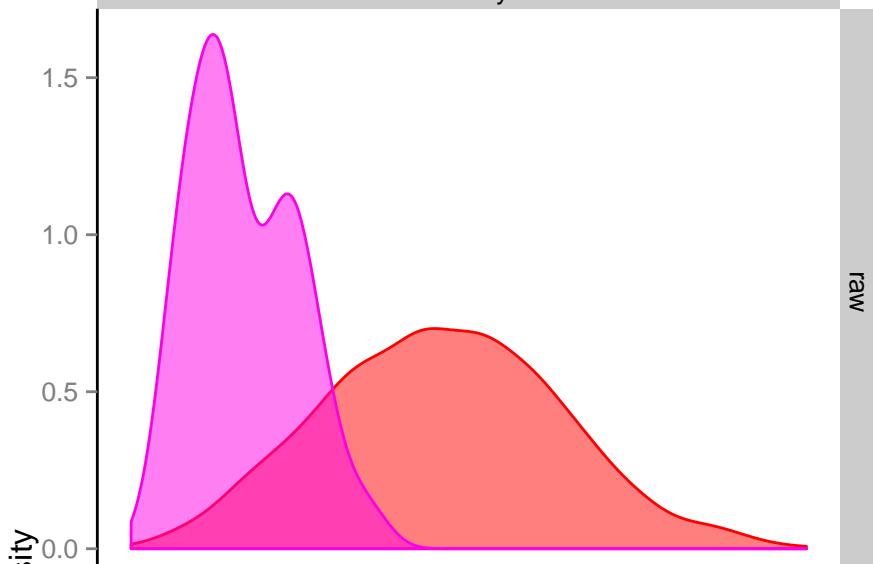

**PLATFORMRUNDAY\_miss**

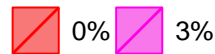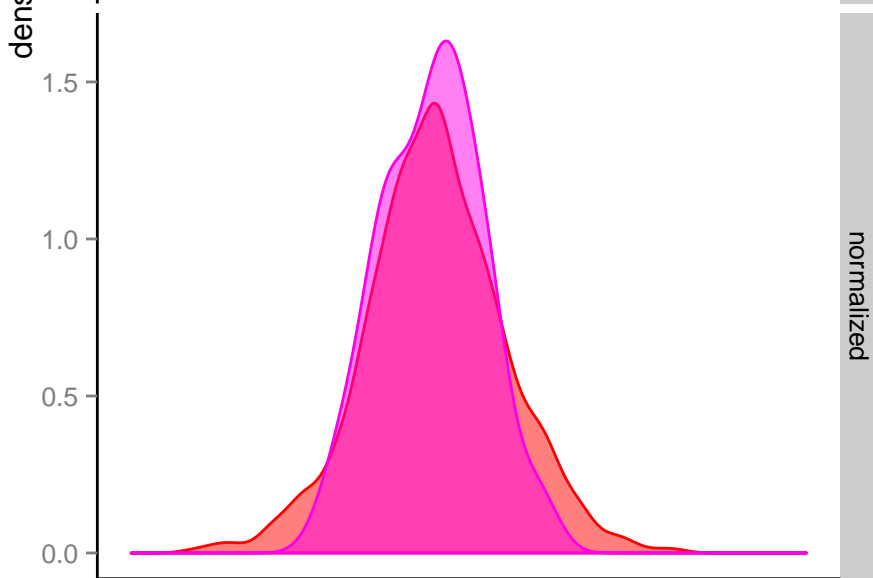

log(ion counts)

# X-12253

runday

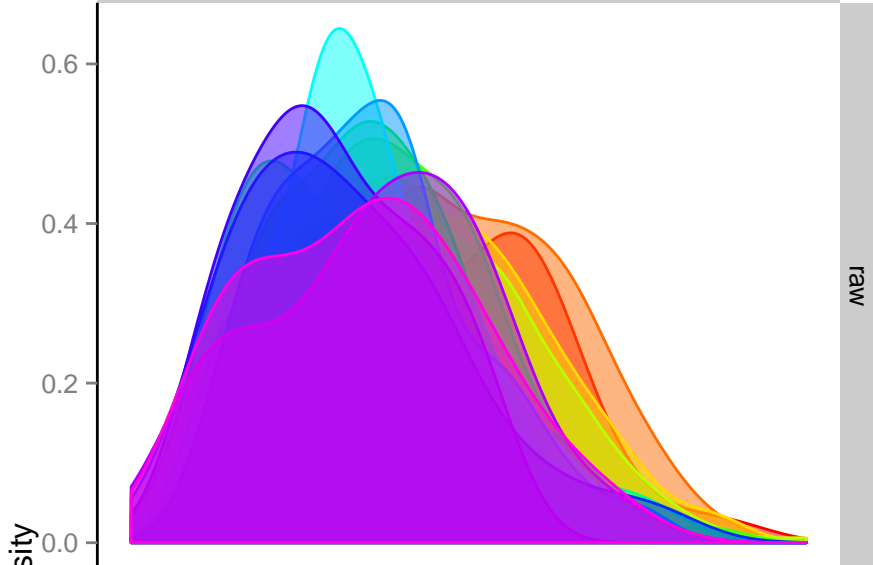

raw

## PLATFORMRUNDAY\_miss

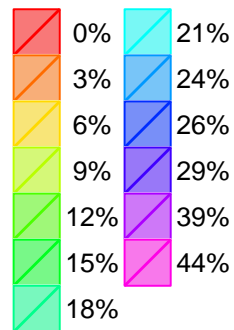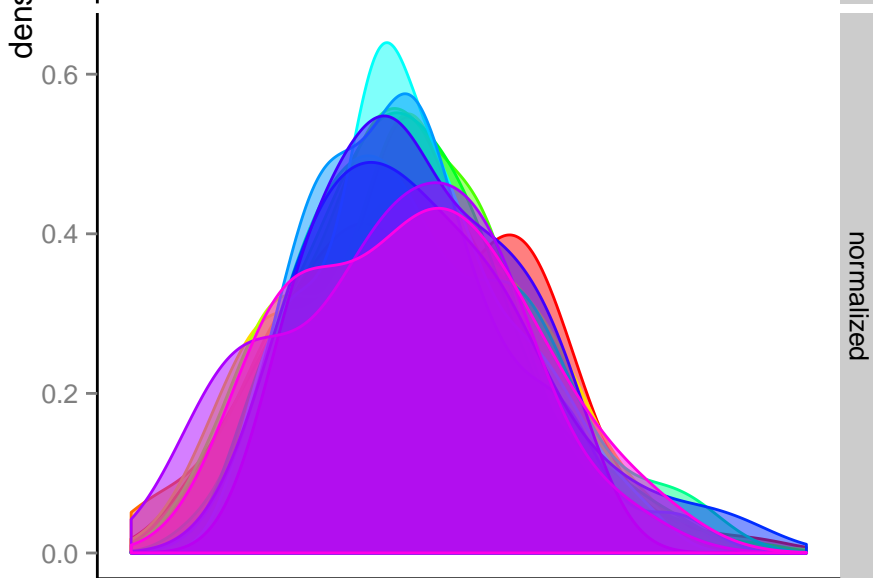

normalized

log(ion counts)

# X-12261

runday

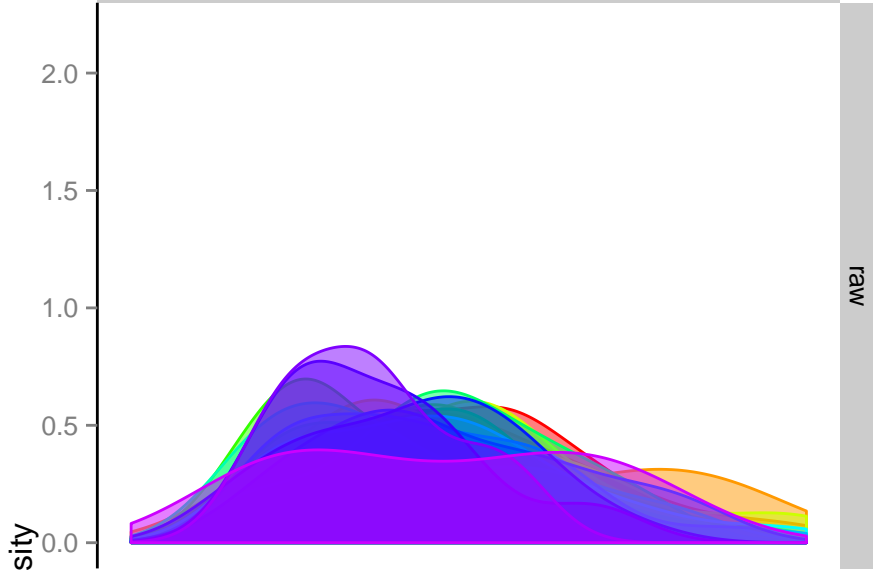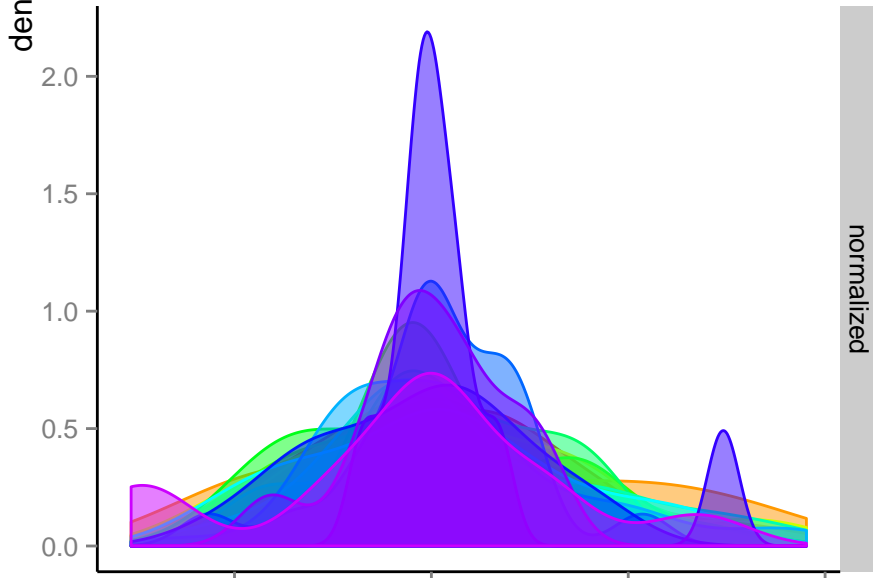

## PLATFORMRUNDAY\_miss

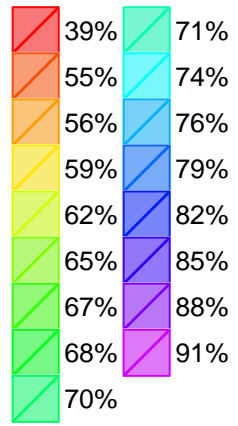

# X-12263

runday

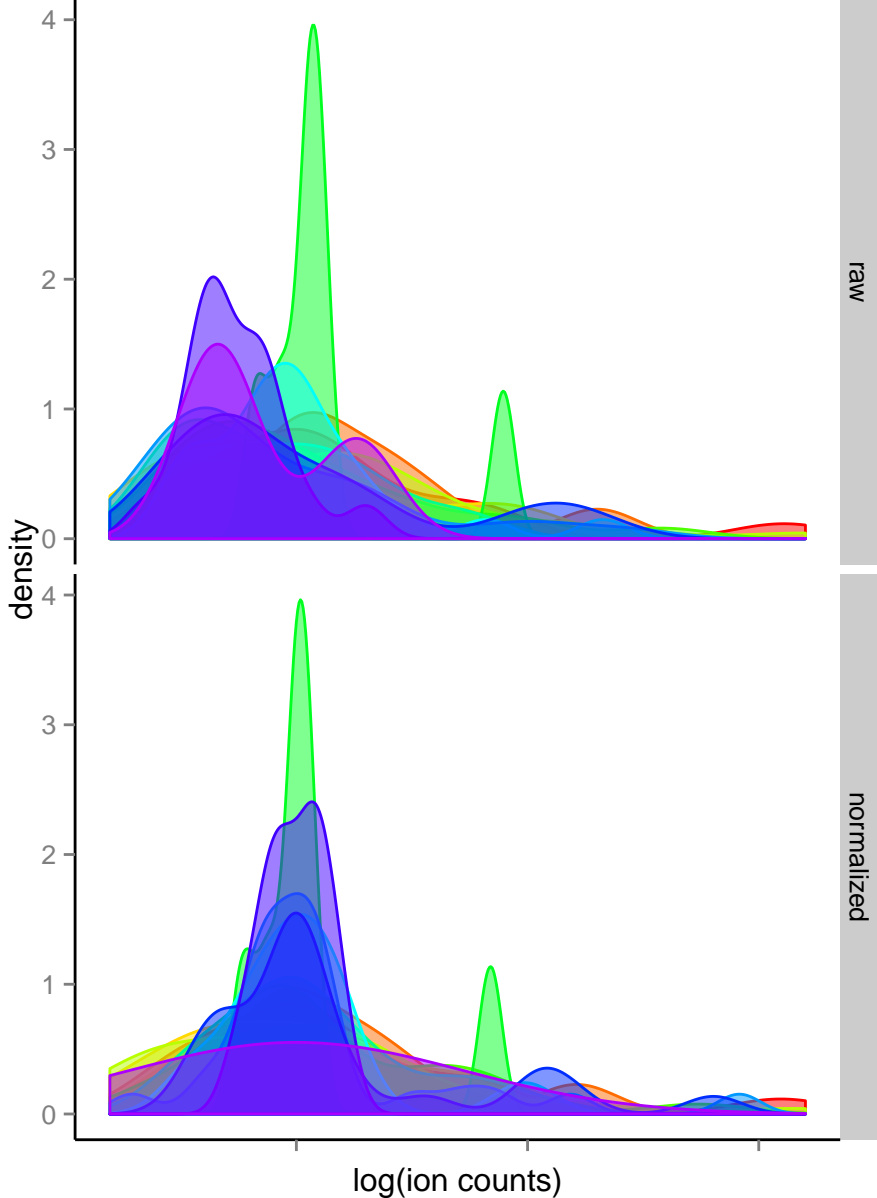

## PLATFORMRUNDAY\_miss

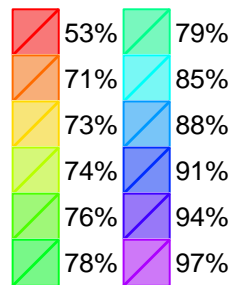

# X-12329

runday

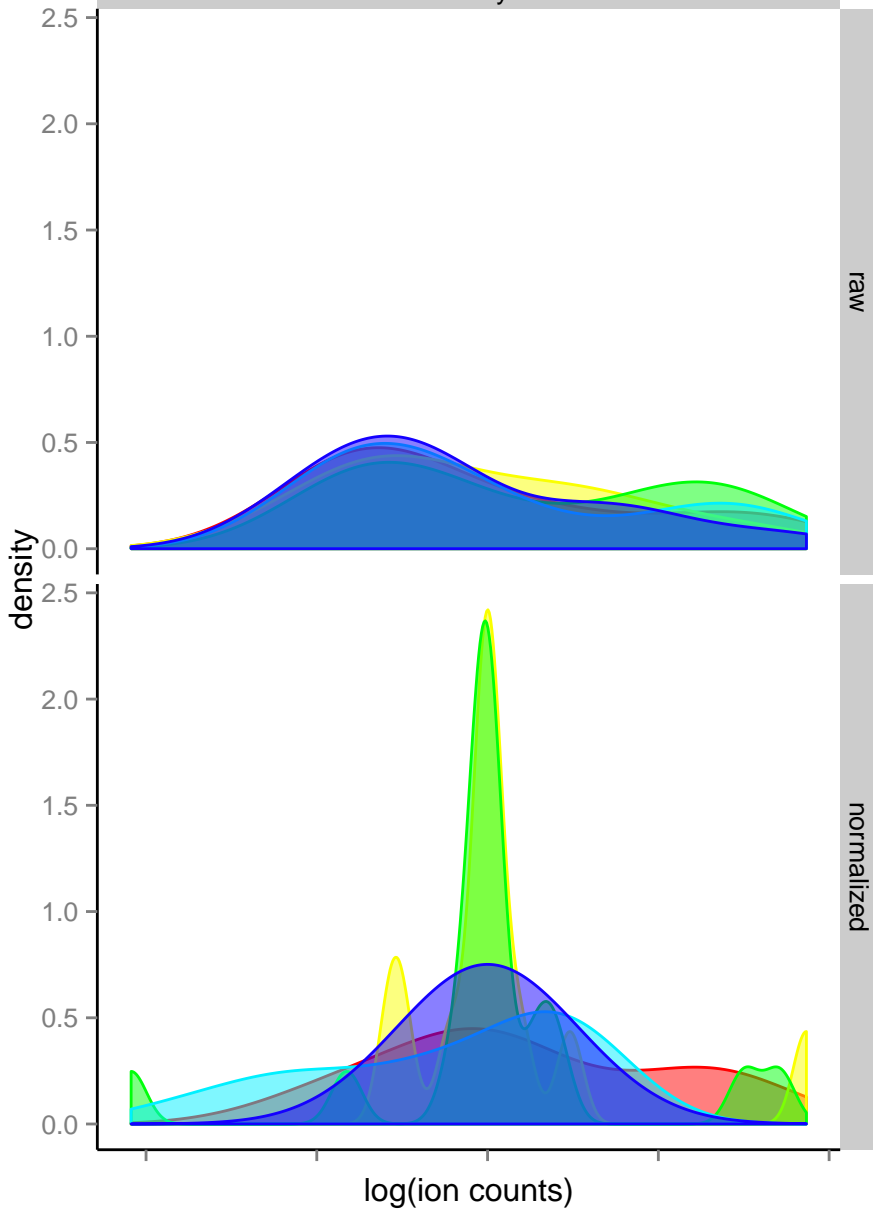

## PLATFORMRUNDAY\_miss

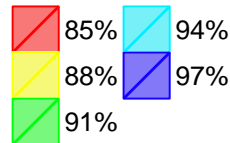

# X-12405

runday

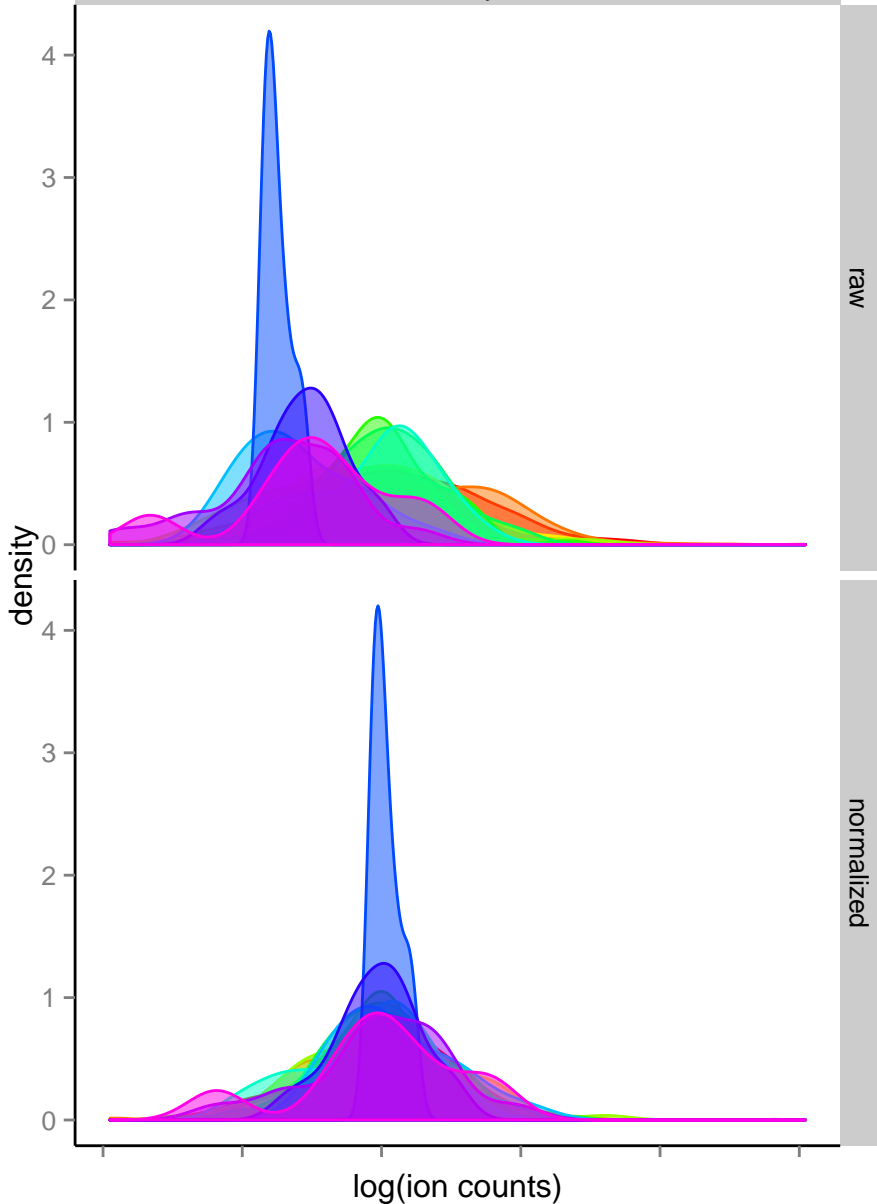

## PLATFORMRUNDAY\_miss

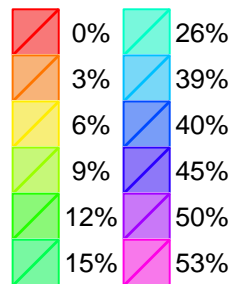

# X-12407

runday

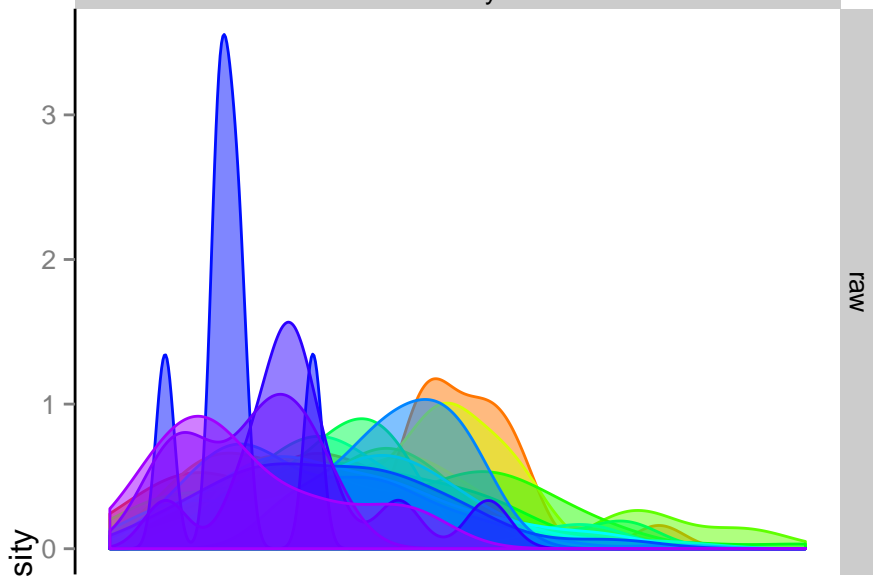

raw

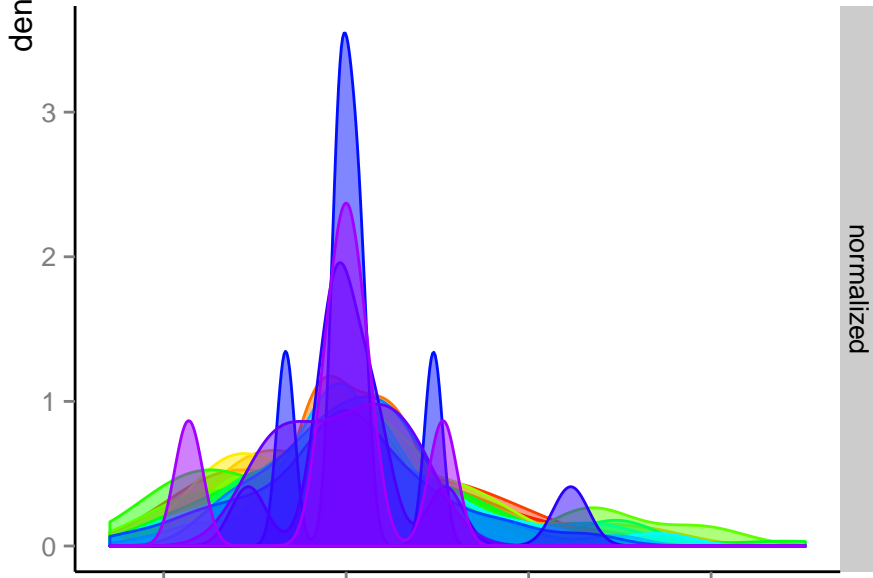

normalized

log(ion counts)

## PLATFORMRUNDAY\_miss

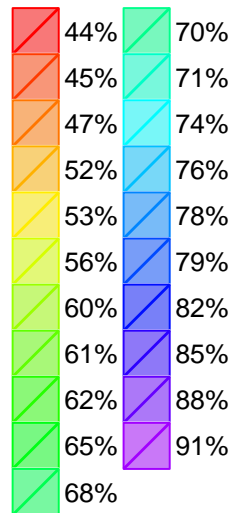

# X-12428

runday

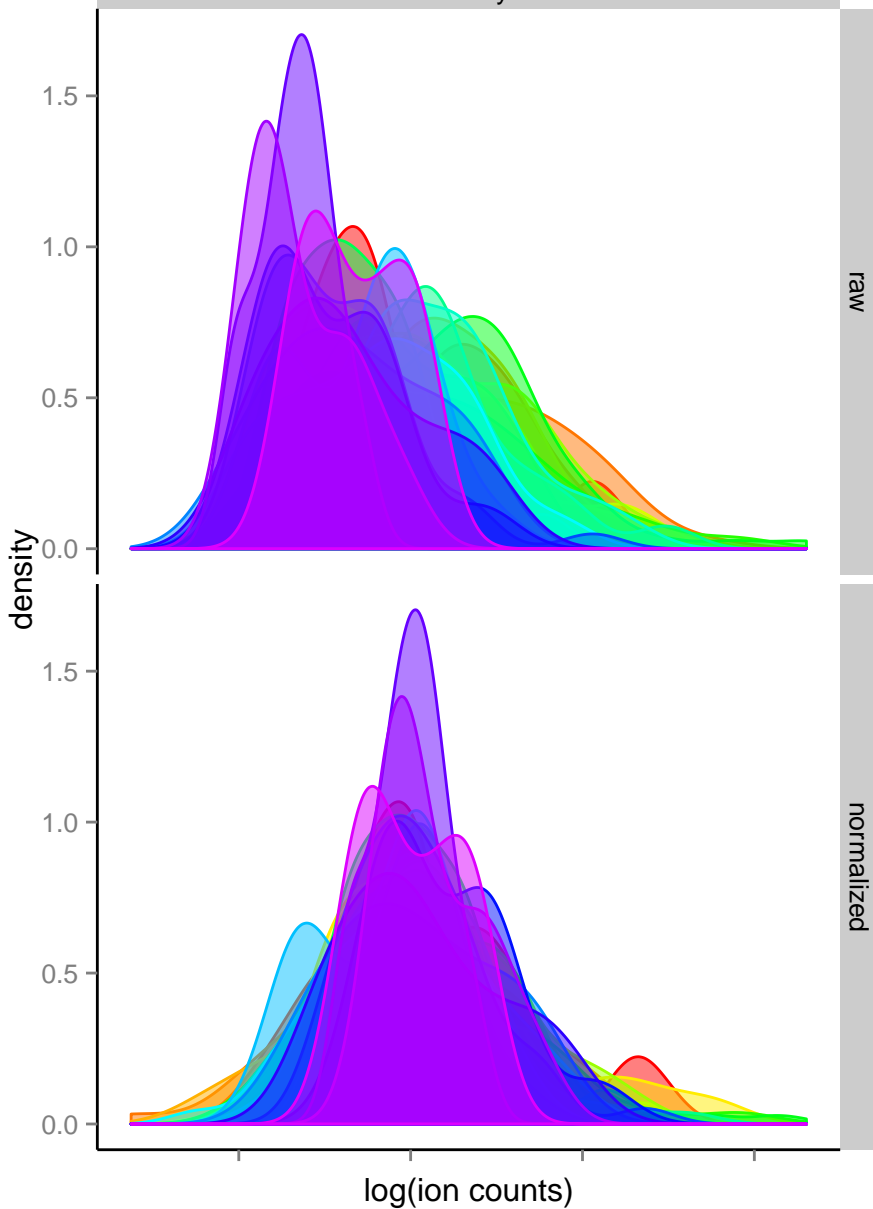

## PLATFORMRUNDAY\_miss

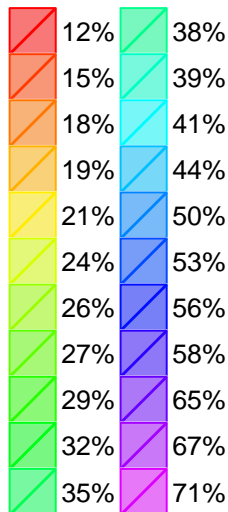



# X-12435

runday

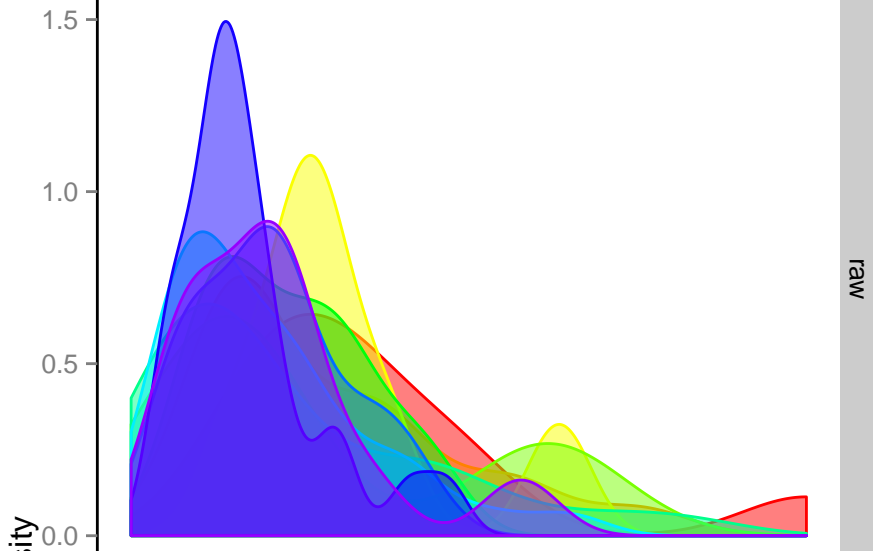

raw

## PLATFORMRUNDAY\_miss

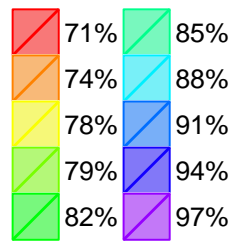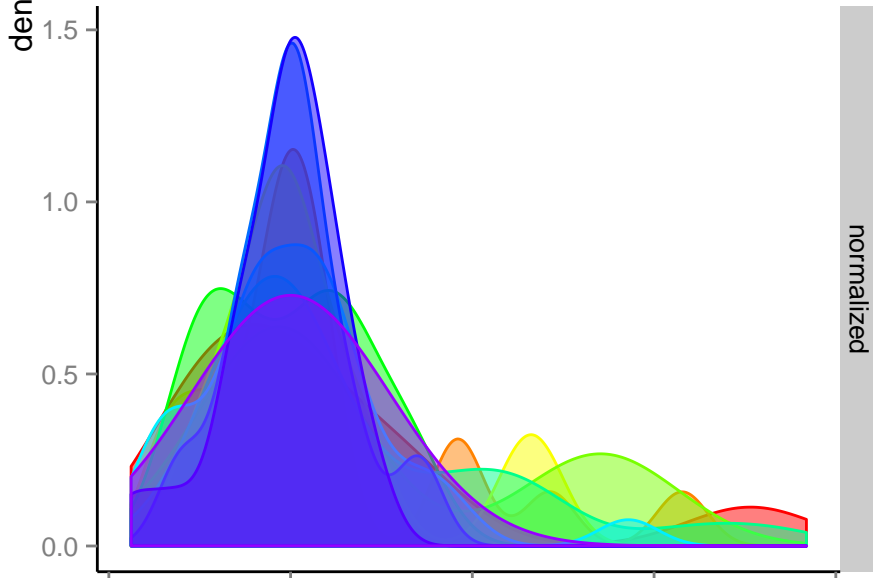

normalized

log(ion counts)

# 12-hydroxyeicosatetraenoate (12-HETE)

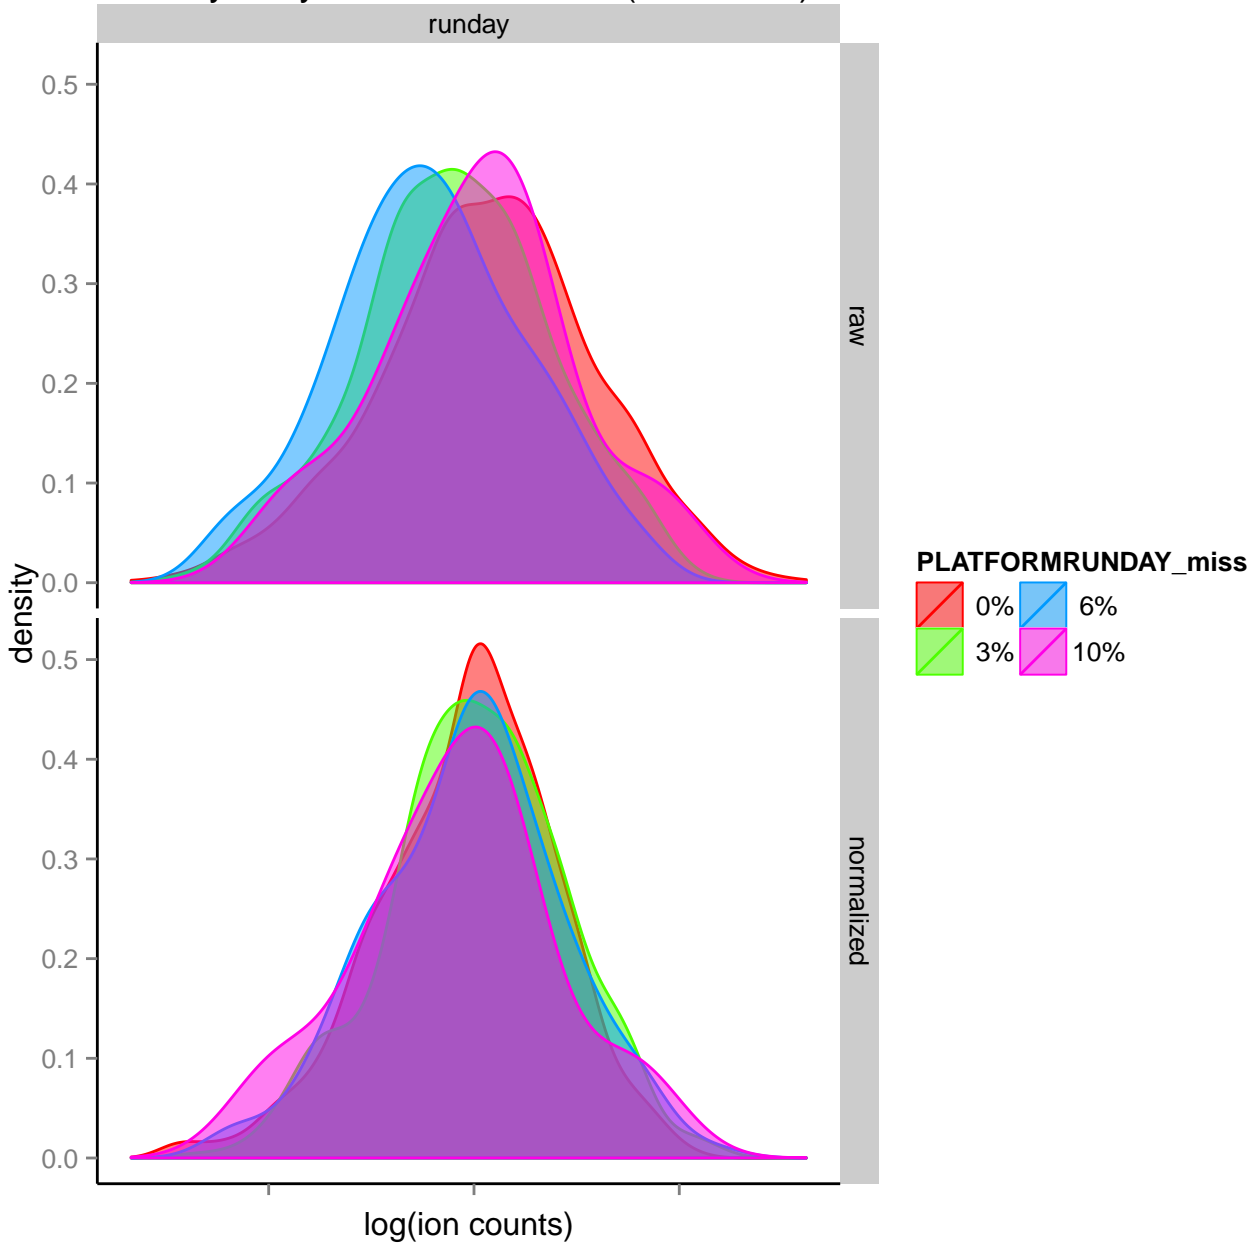

# 5,8-tetradecadienoate

runday

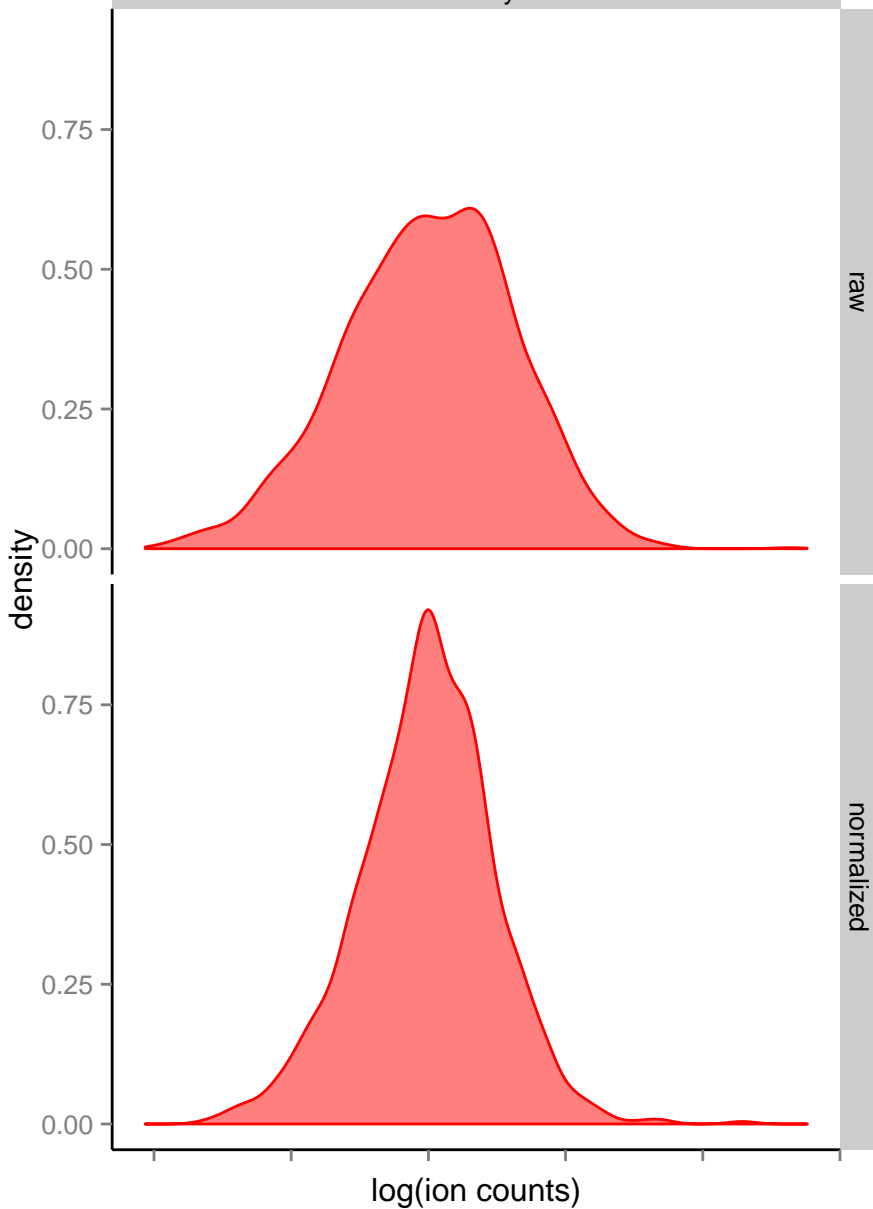

raw

normalized

**PLATFORMRUNDAY\_miss**

0%

# X-12443

runday

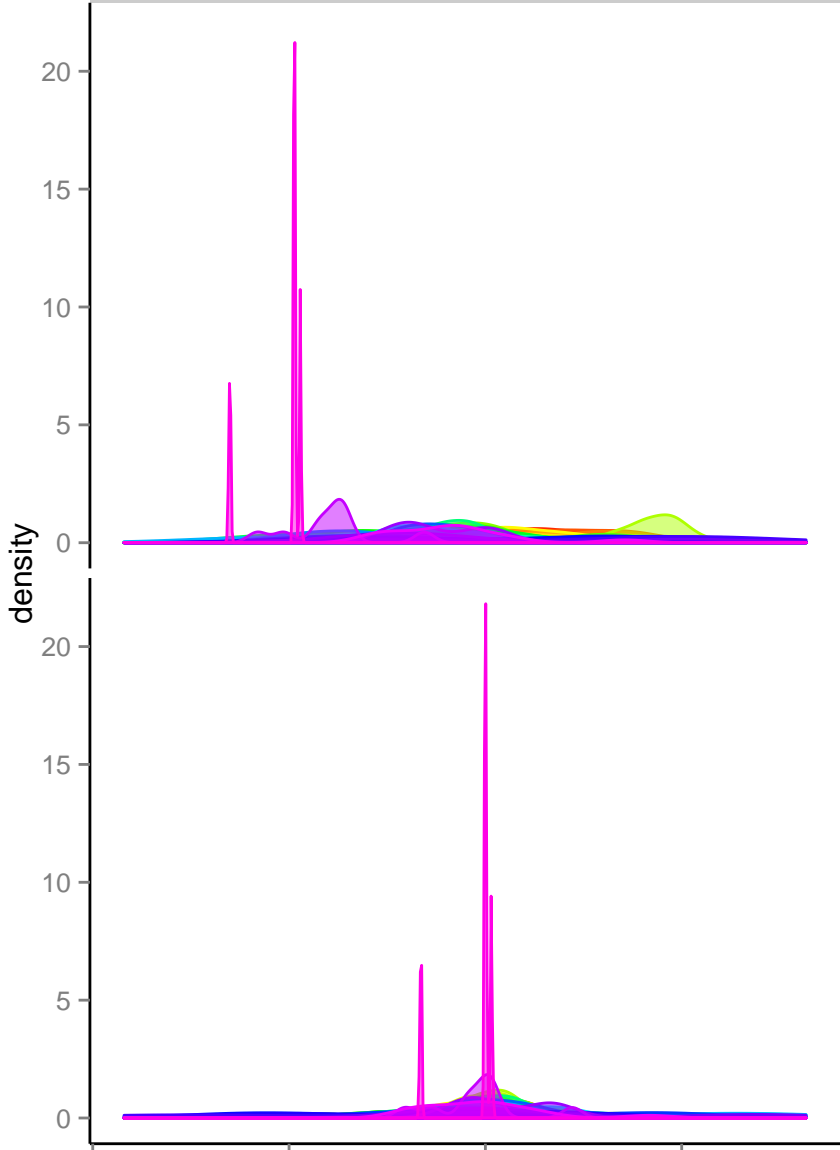

## PLATFORMRUNDAY\_miss

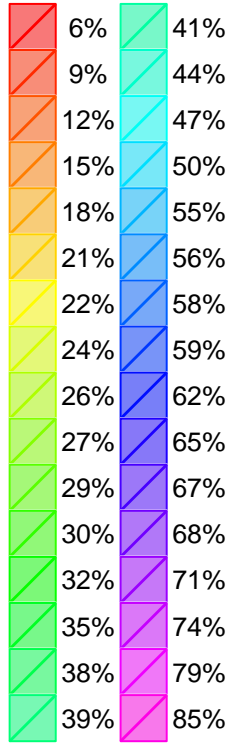

# X-12450

runday

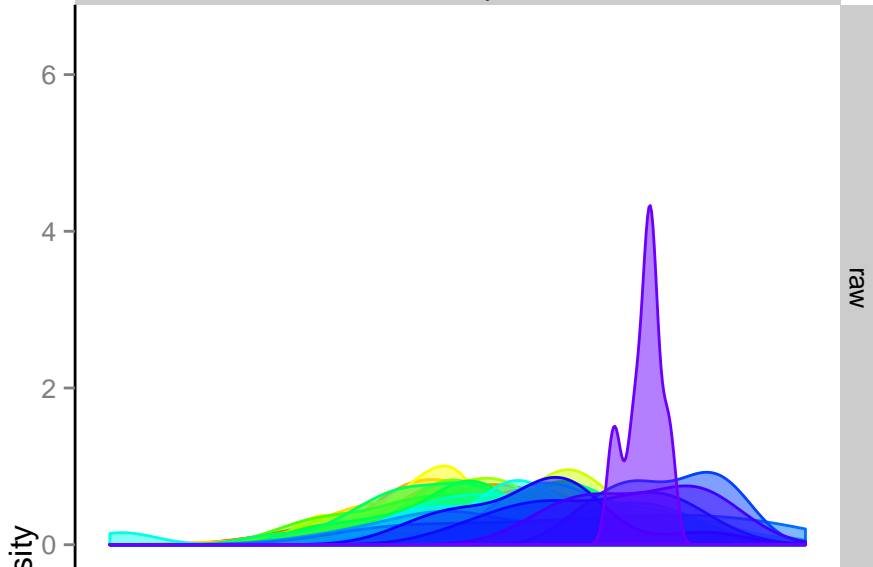

raw

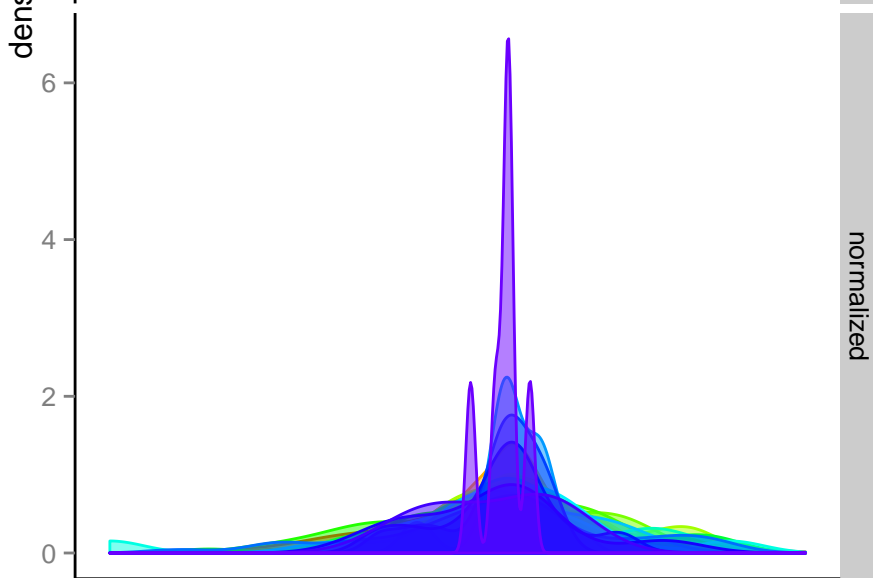

normalized

log(ion counts)

## PLATFORMRUNDAY\_miss

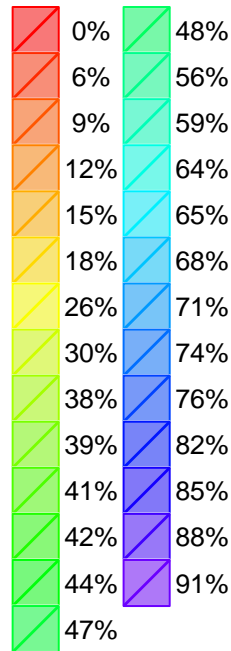

# X-12456

runday

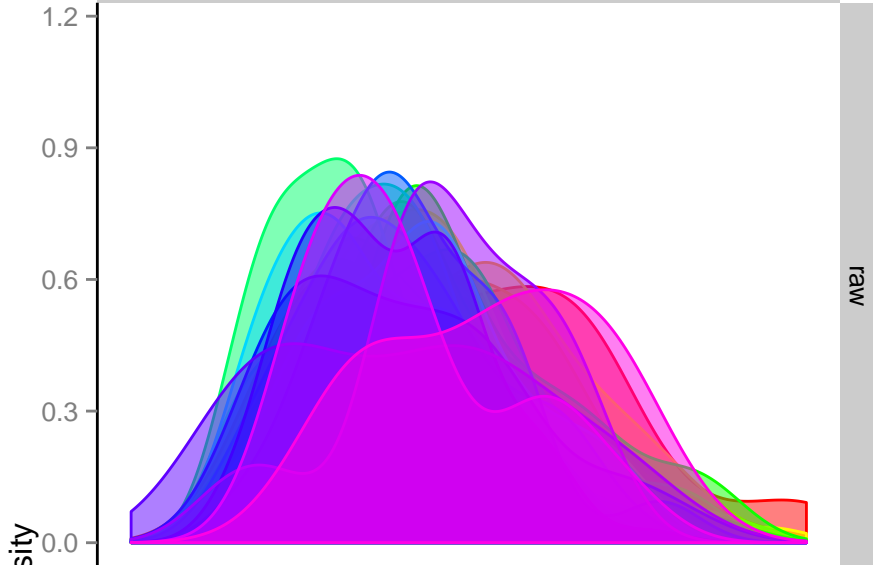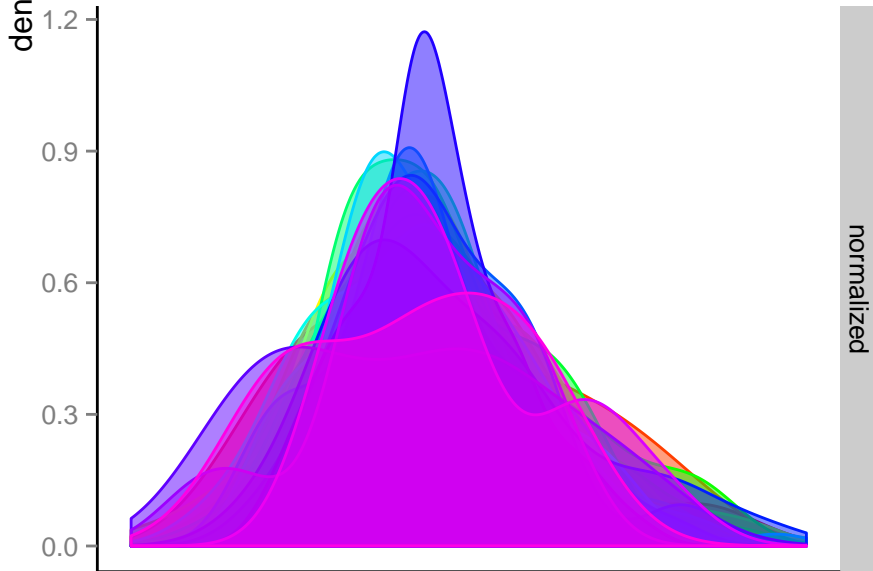

## PLATFORMRUNDAY\_miss

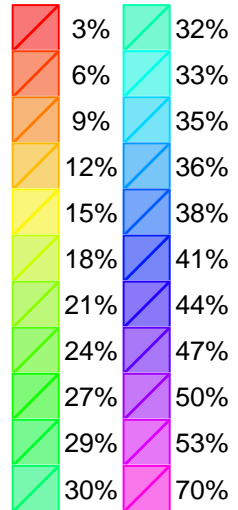

log(ion counts)

# X-12465

runday

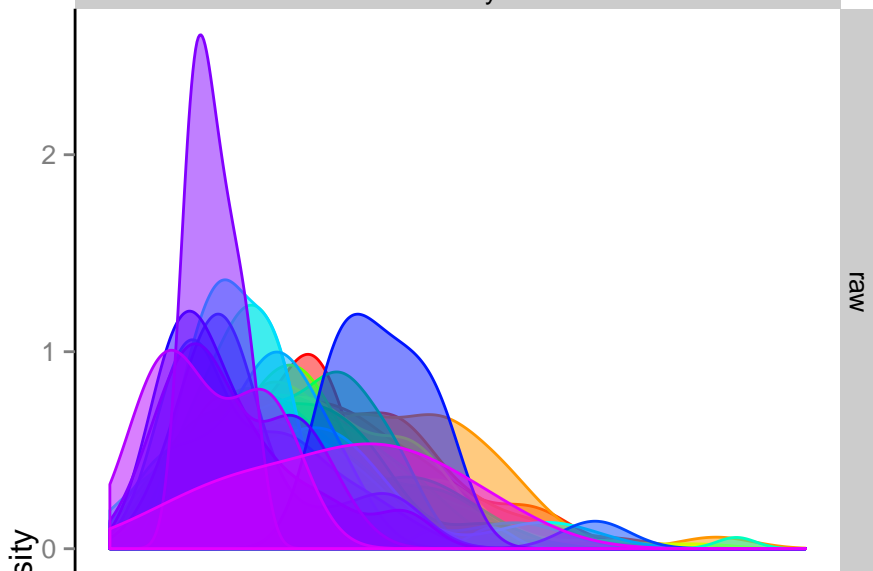

raw

## PLATFORMRUNDAY\_miss

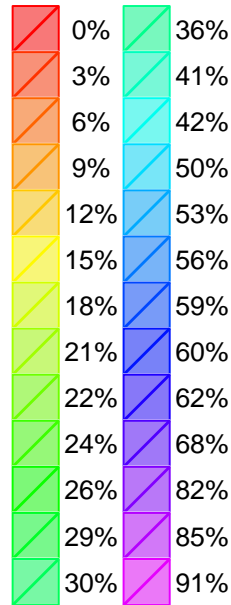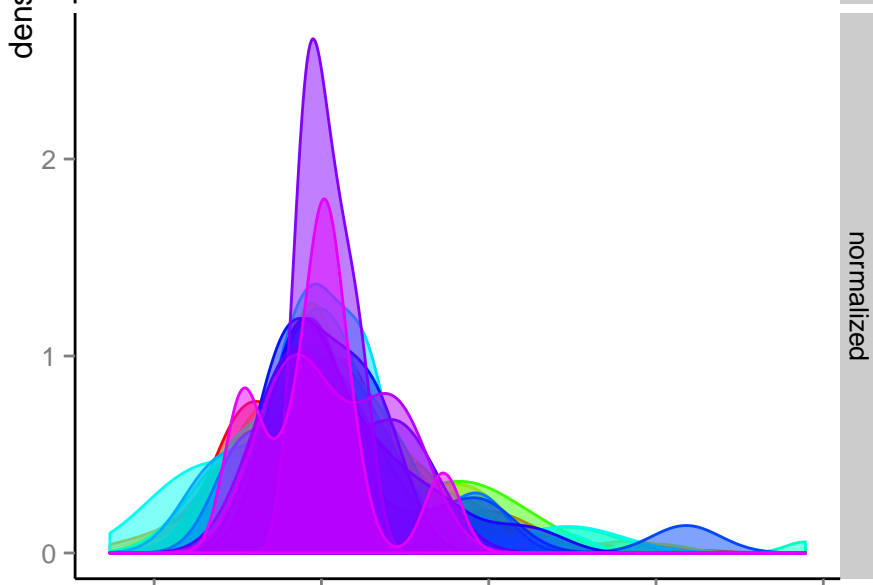

normalized

log(ion counts)

# X-12510

runday

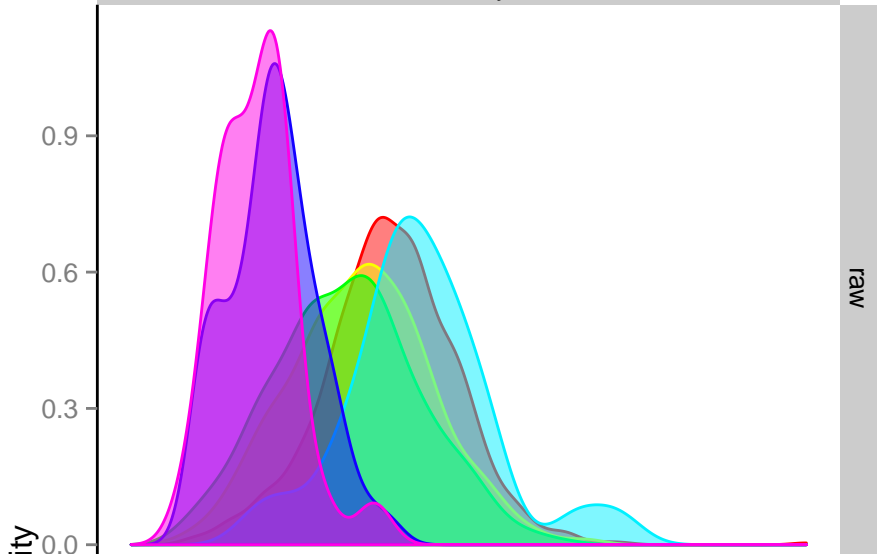

raw

## PLATFORMRUNDAY\_miss

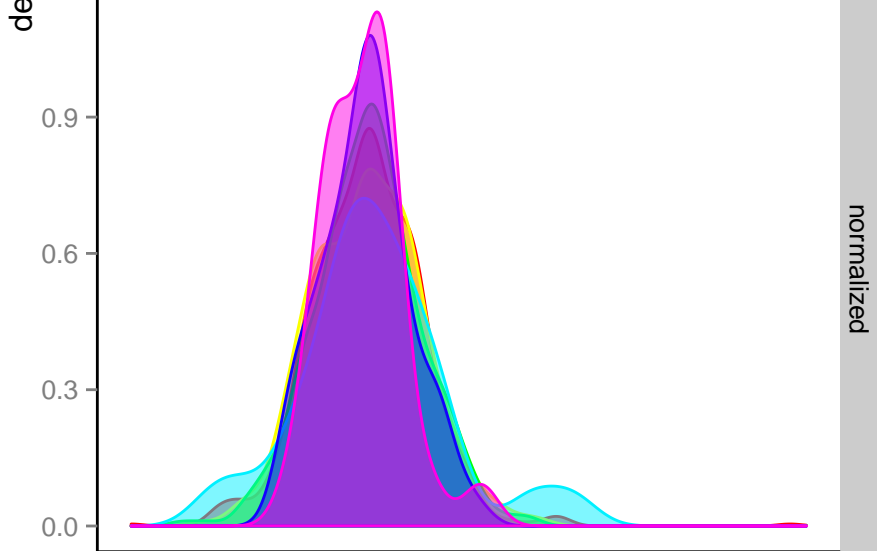

normalized

log(ion counts)



# X-12524

runday

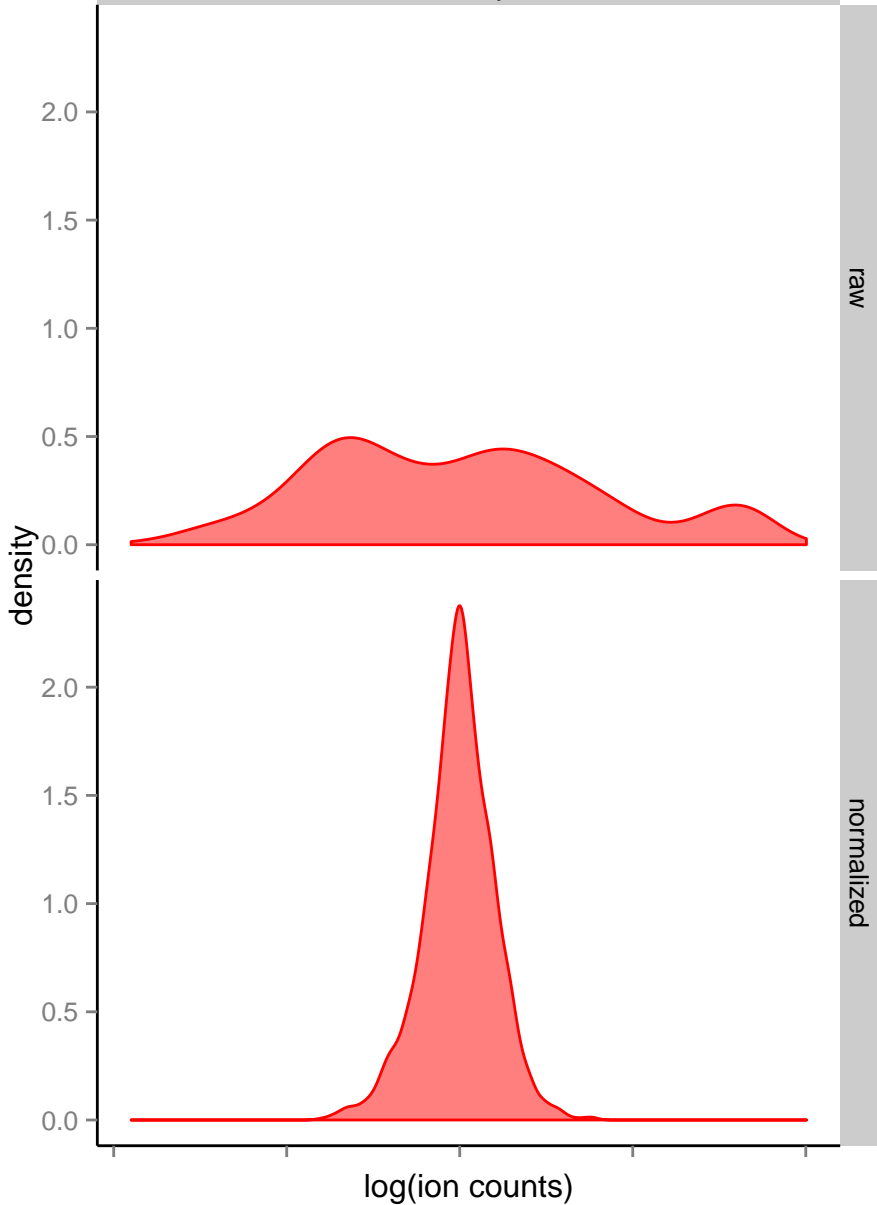

**PLATFORMRUNDAY\_miss**

0%

# X-12544

runday

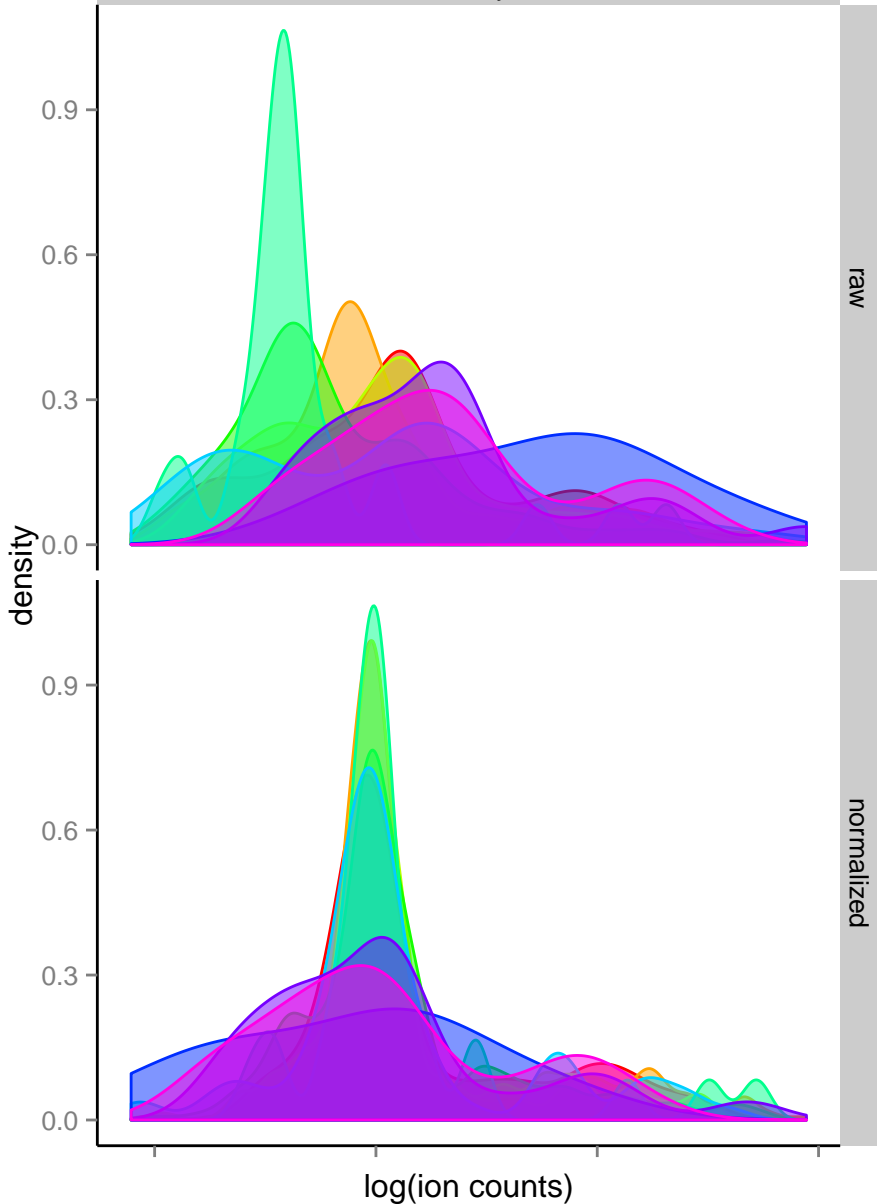

**PLATFORMRUNDAY\_miss**

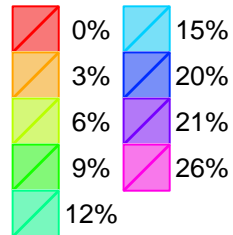

# X-12556

runday

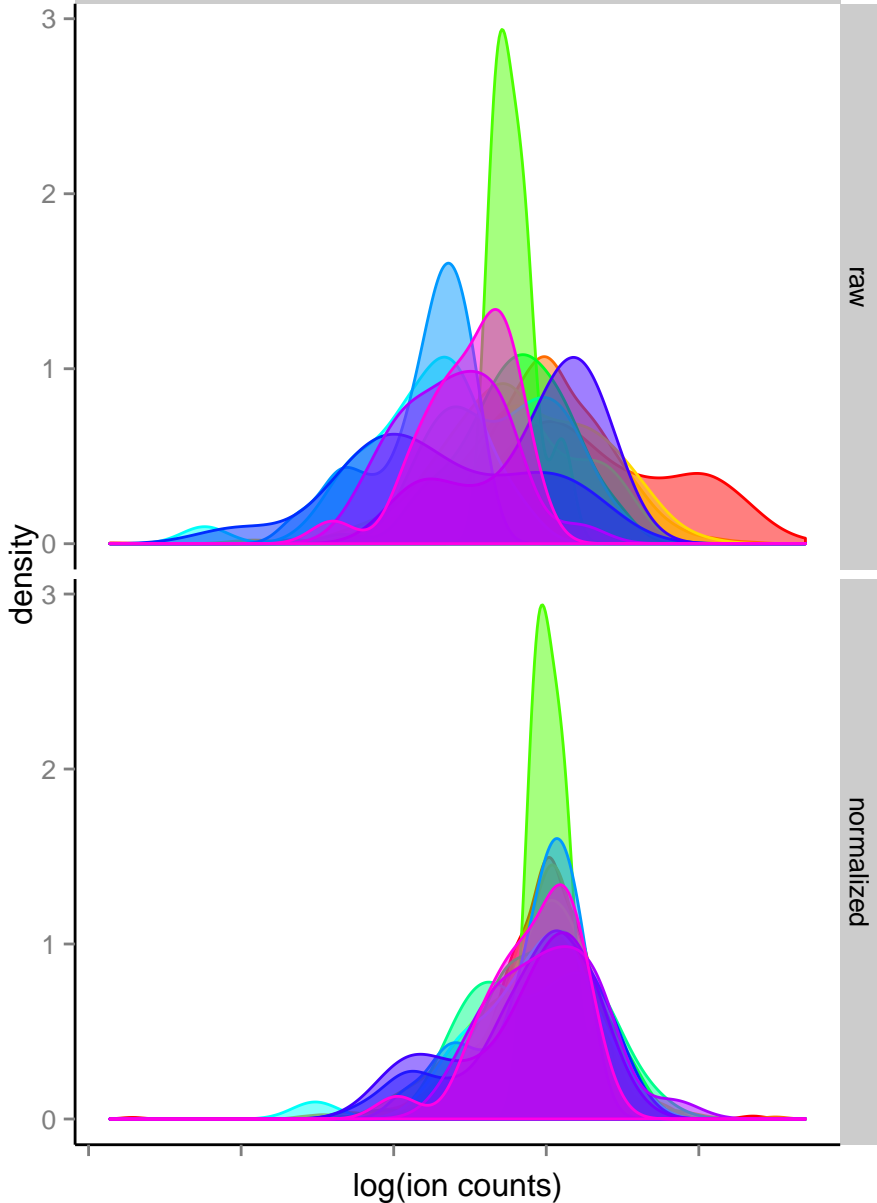

## PLATFORMRUNDAY\_miss

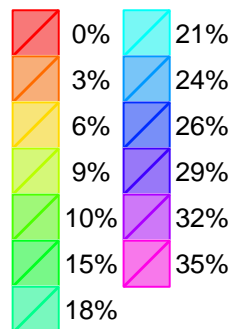

X-12627

runday

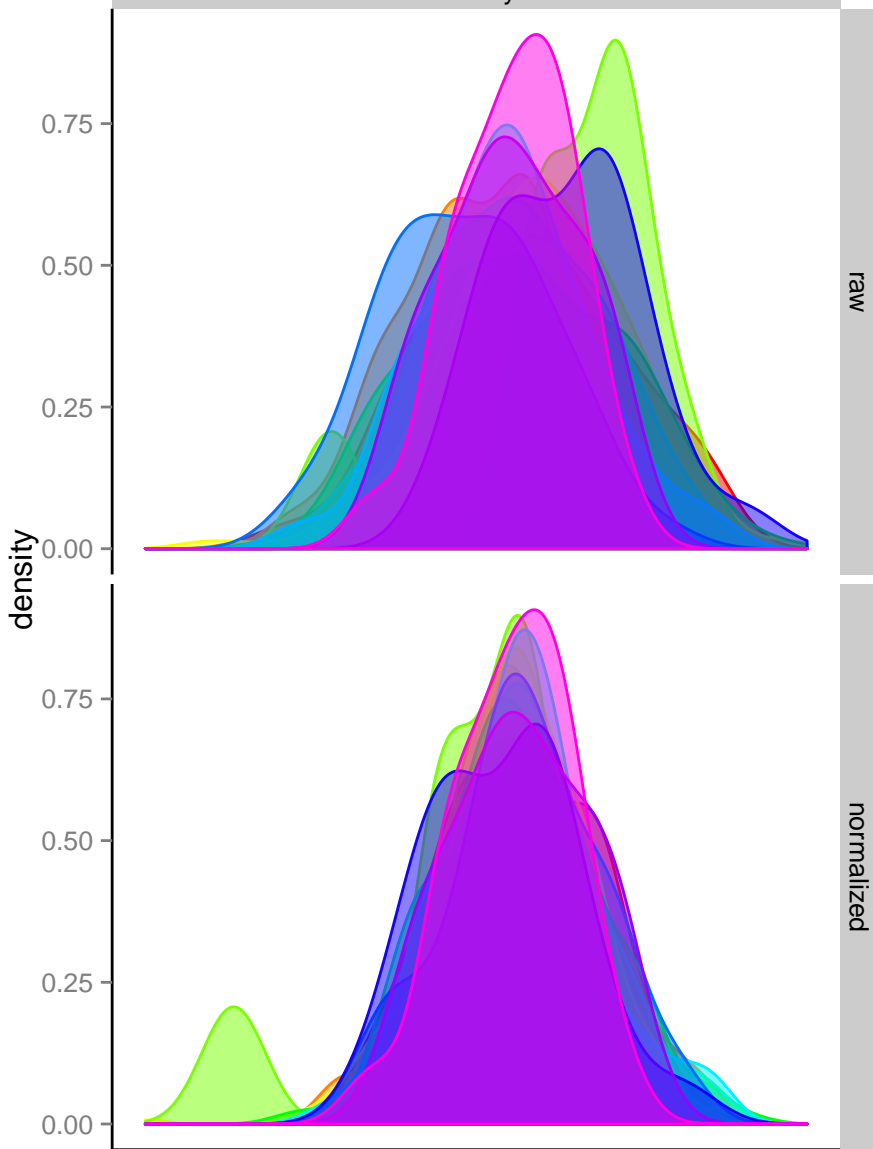

raw

normalized

**PLATFORMRUNDAY\_miss**

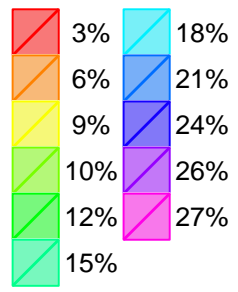

log(ion counts)

# X-12644

runday

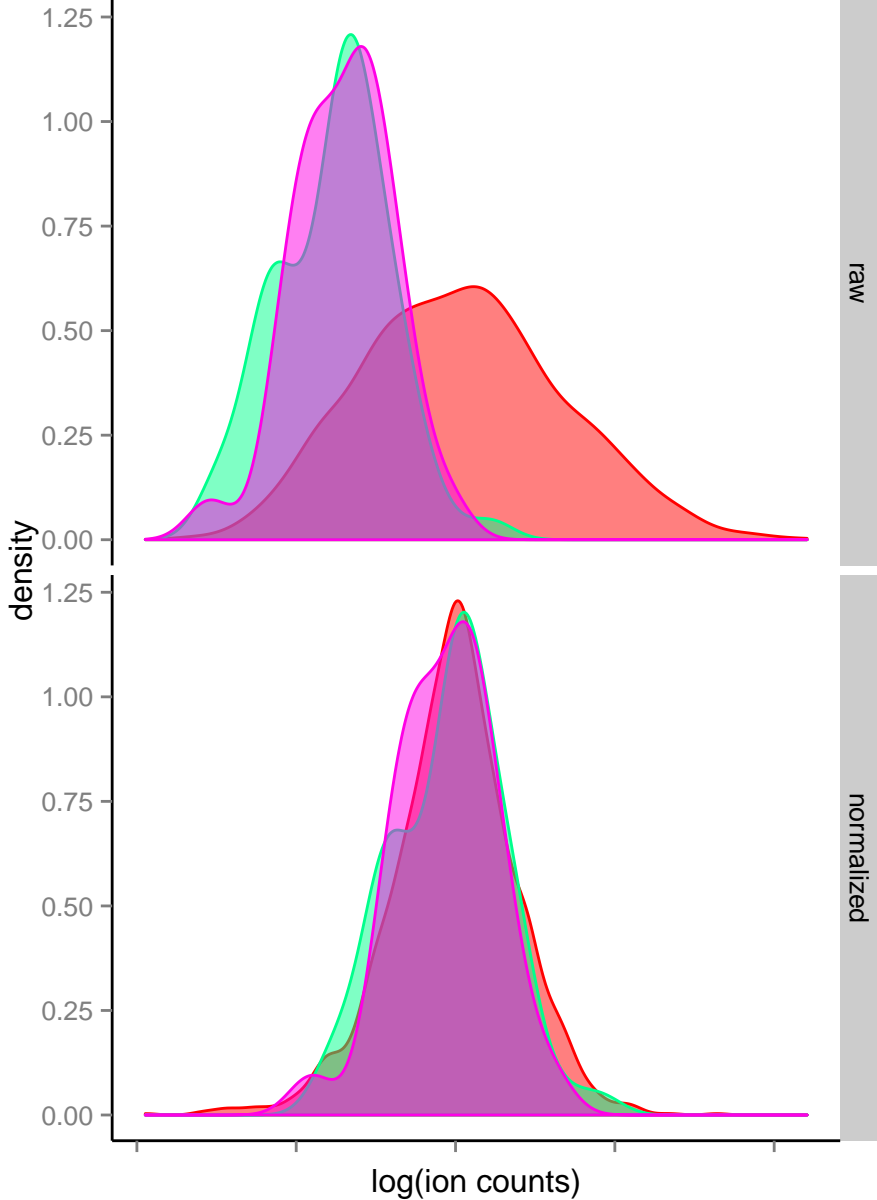

raw

normalized

**PLATFORMRUNDAY\_miss**



# X-12645

runday

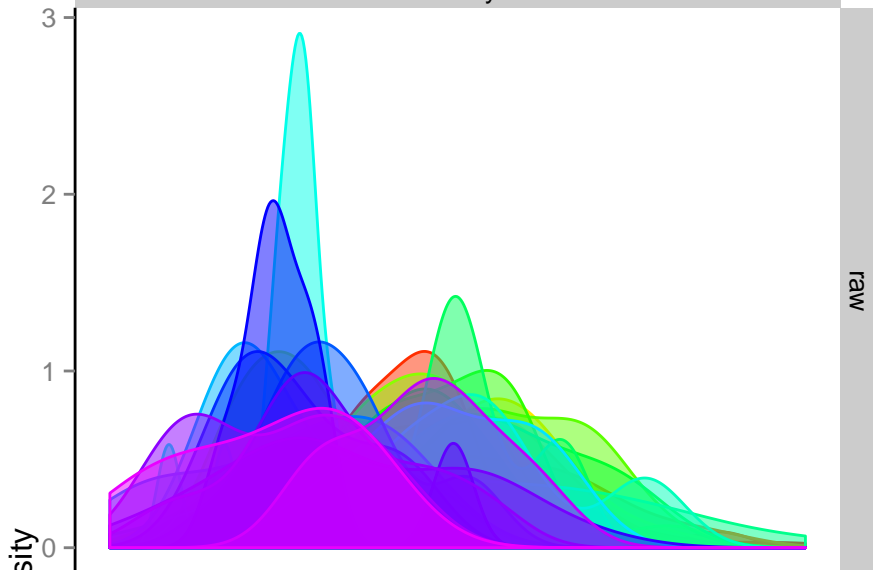

raw

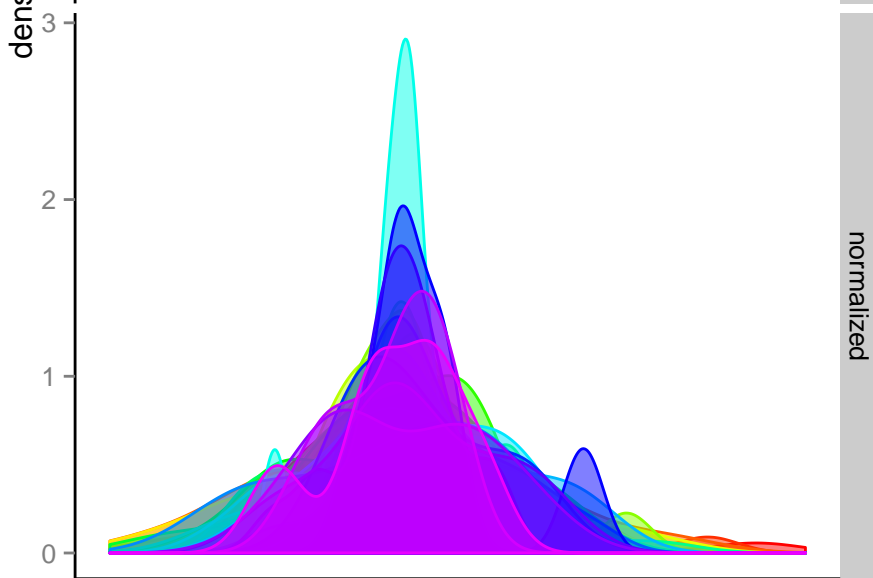

normalized

## PLATFORMRUNDAY\_miss

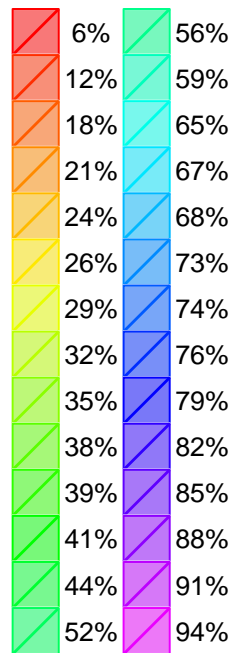

log(ion counts)

# X-12680

runday

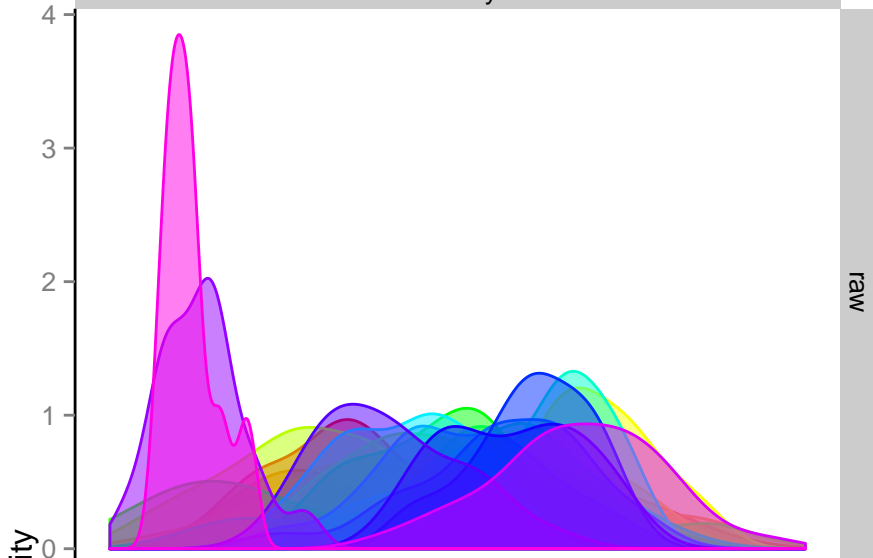

raw

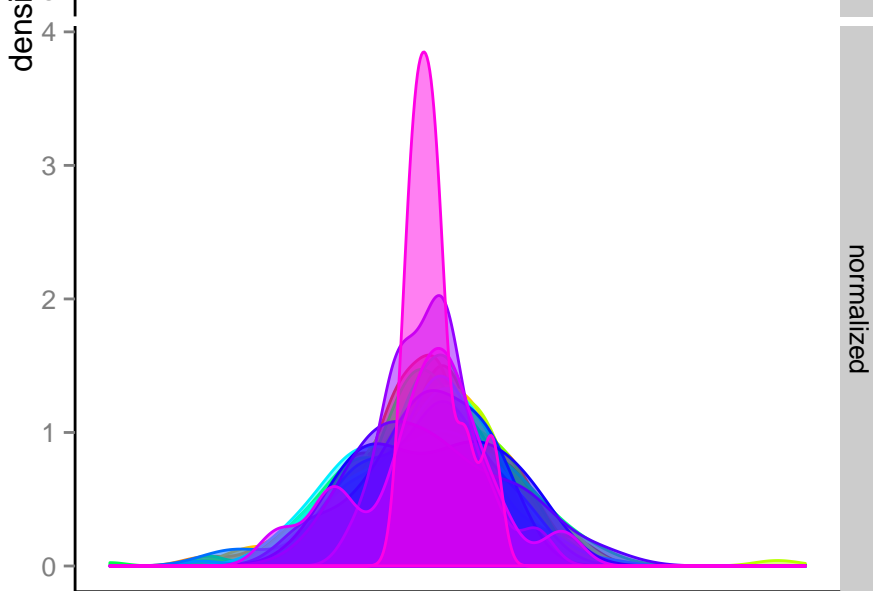

normalized

log(ion counts)

## PLATFORMRUNDAY\_miss

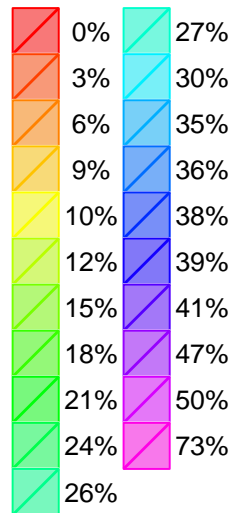

# X-12696

runday

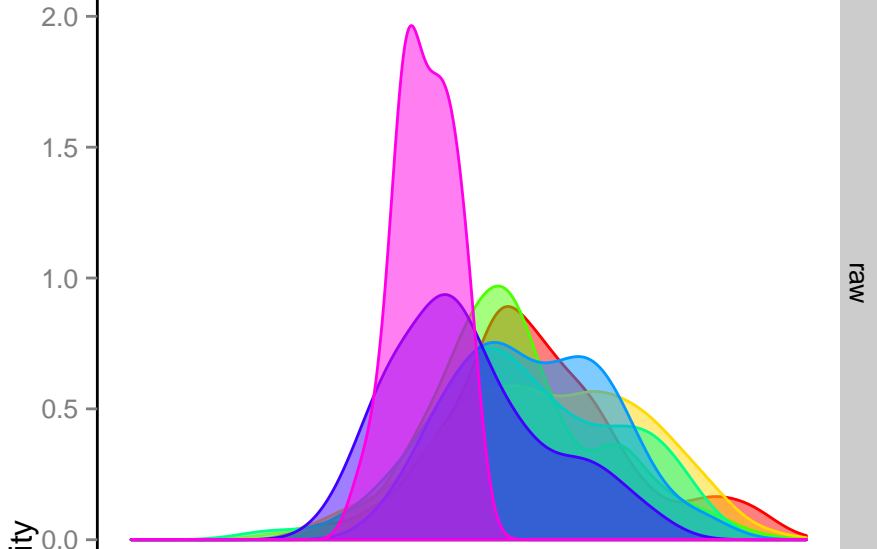

raw

## PLATFORMRUNDAY\_miss

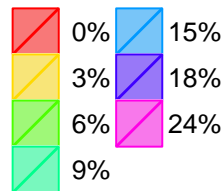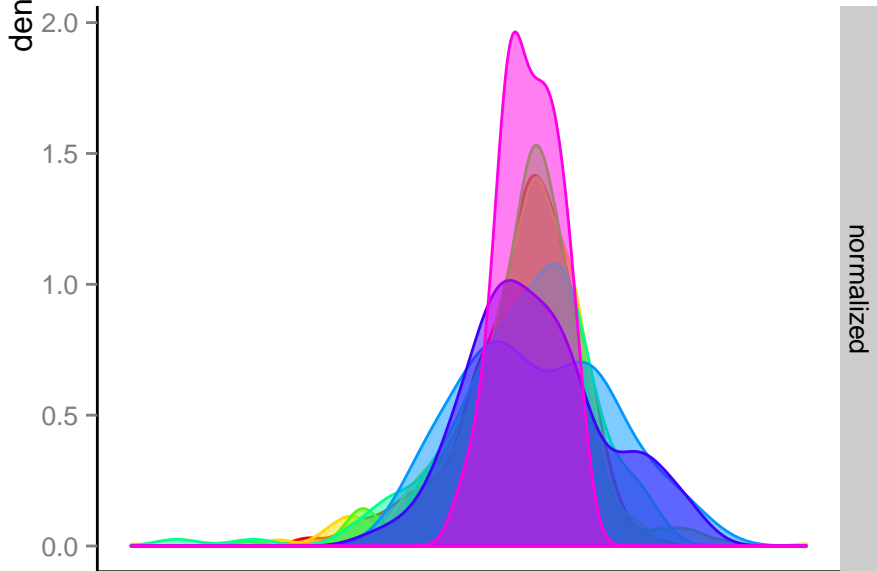

normalized

log(ion counts)



# X-12704

runday

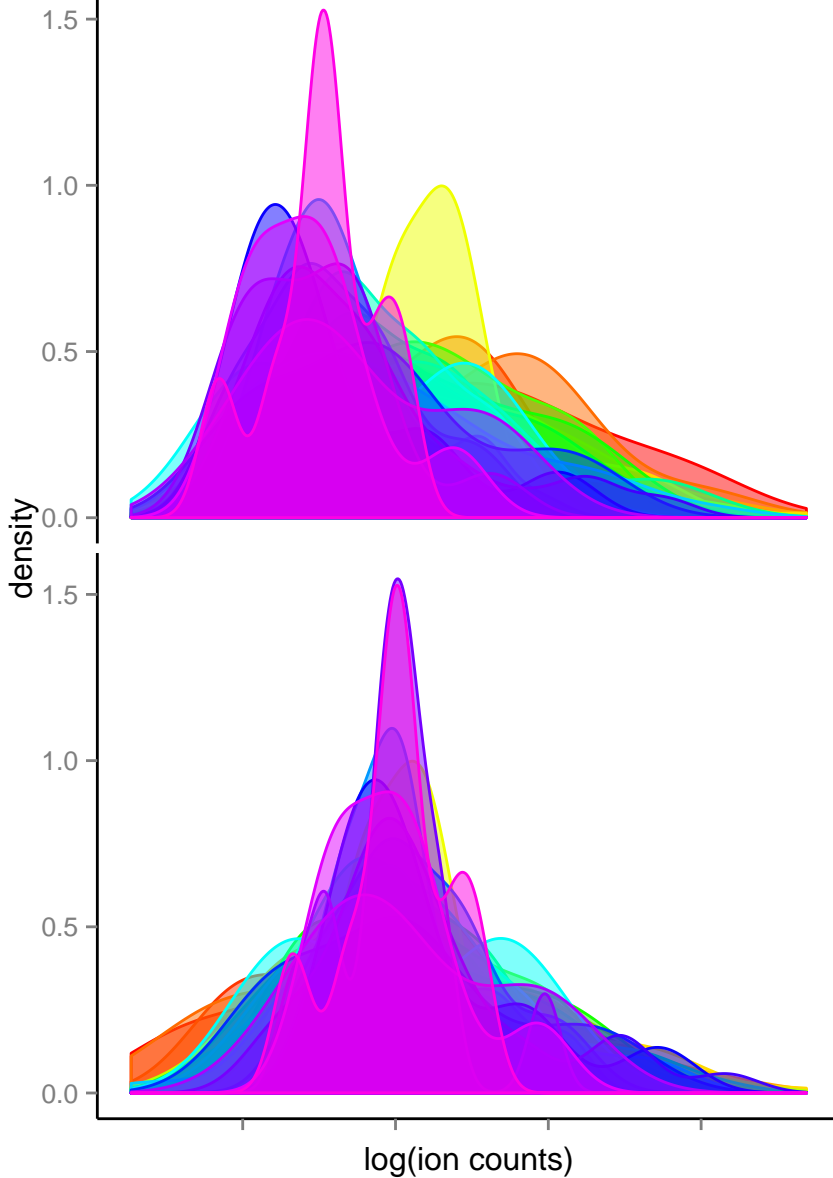

raw

normalized

## PLATFORMRUNDAY\_miss

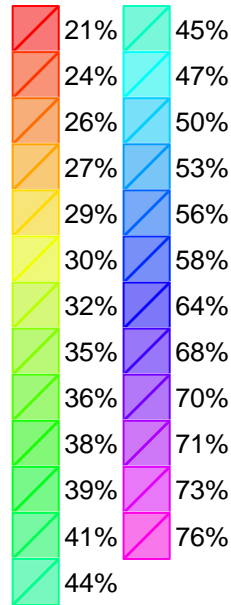

# X-12711

runday

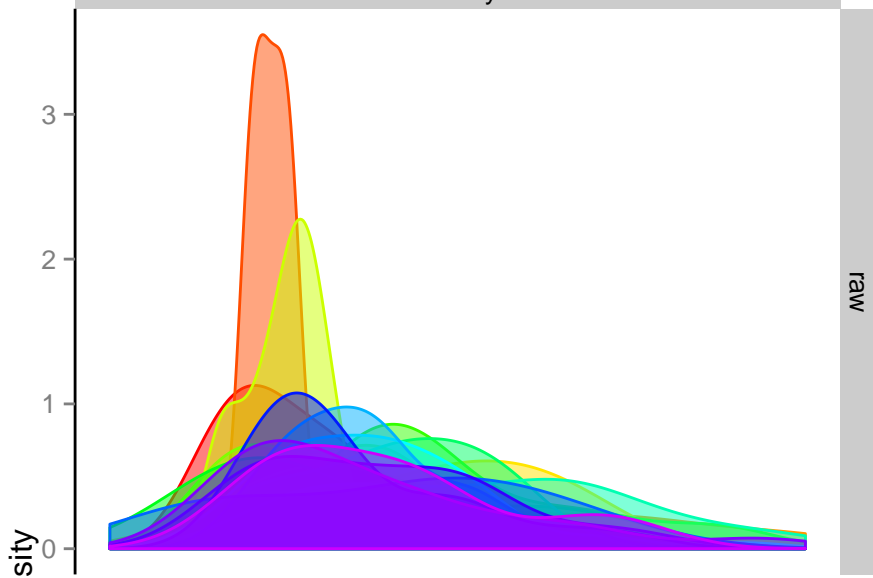

## PLATFORMRUNDAY\_miss

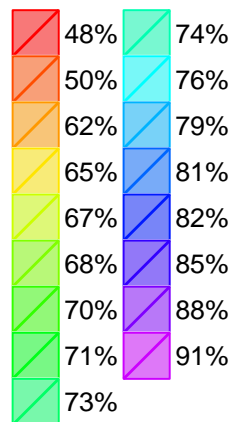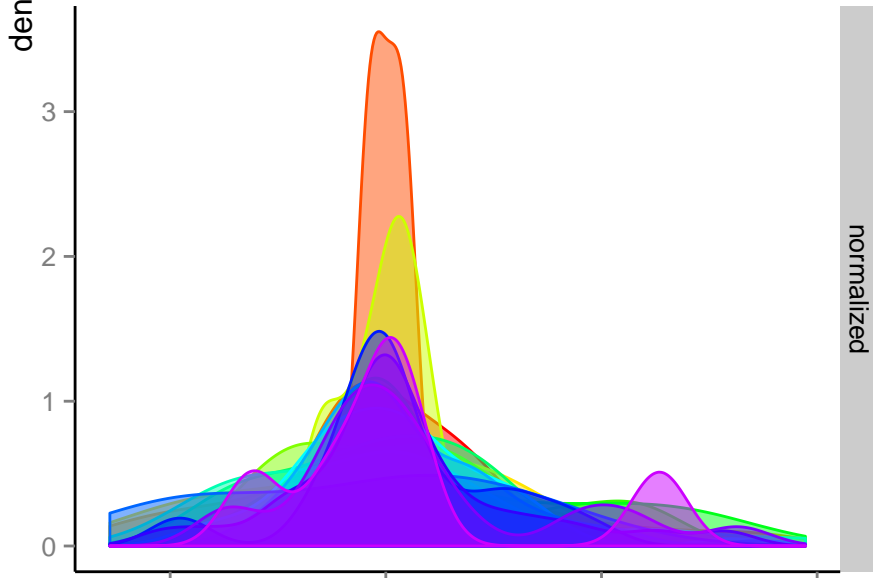

log(ion counts)

# X-12712

runday

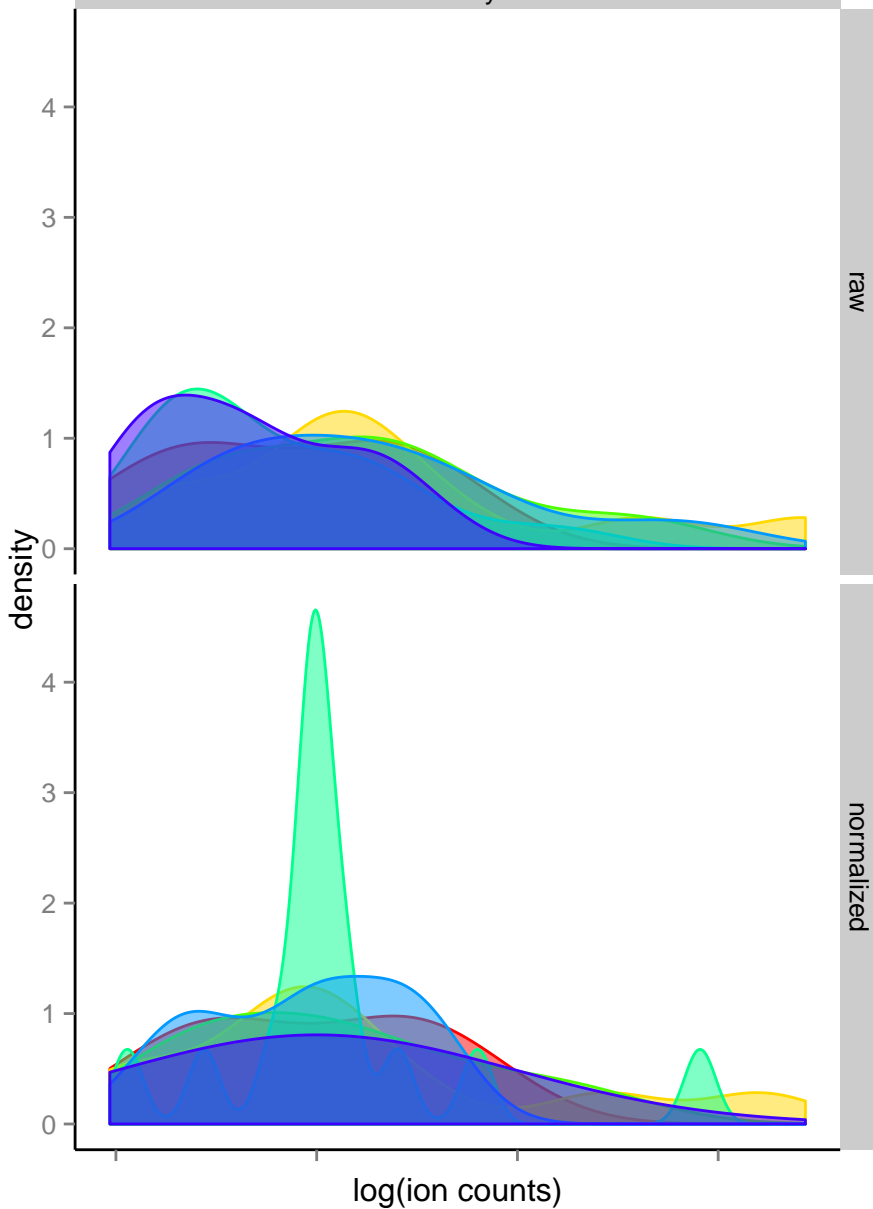

raw

normalized

## PLATFORMRUNDAY\_miss

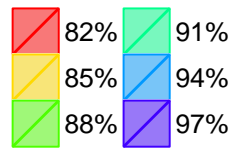

# X-12717

runday

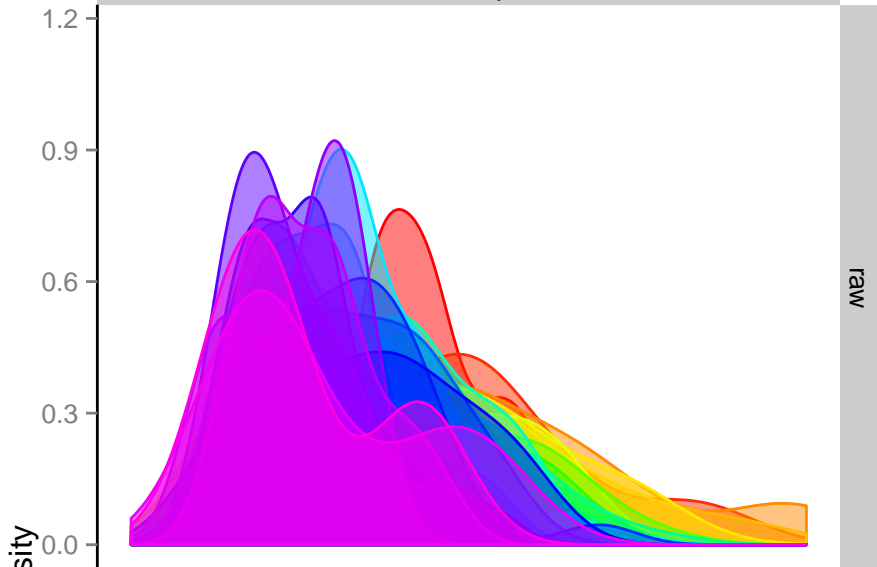

raw

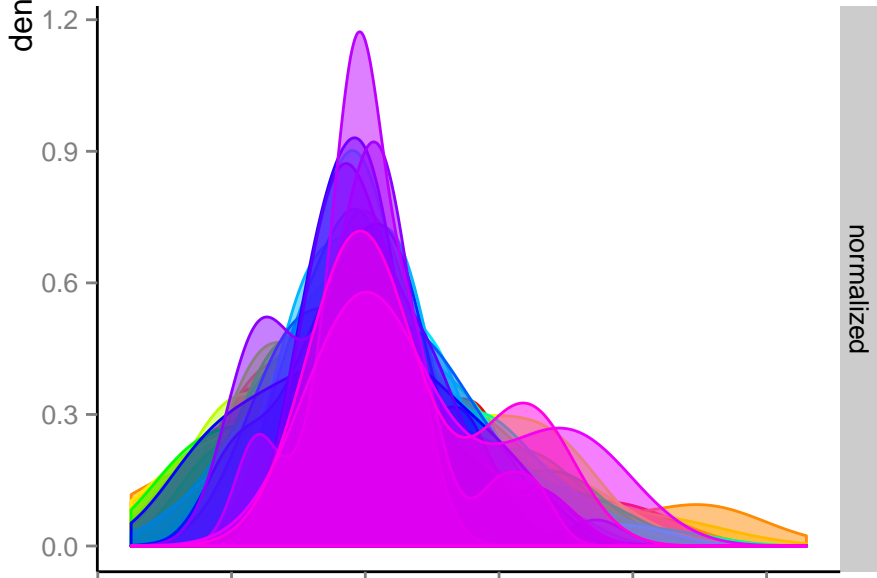

normalized

log(ion counts)

## PLATFORMRUNDAY\_miss

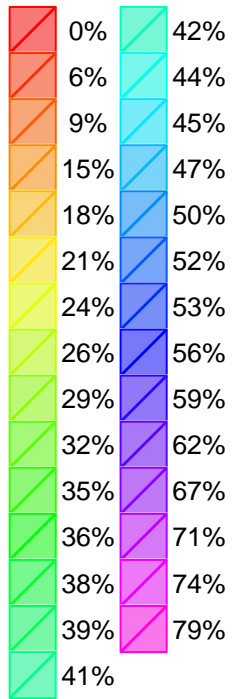

# X-12719

runday

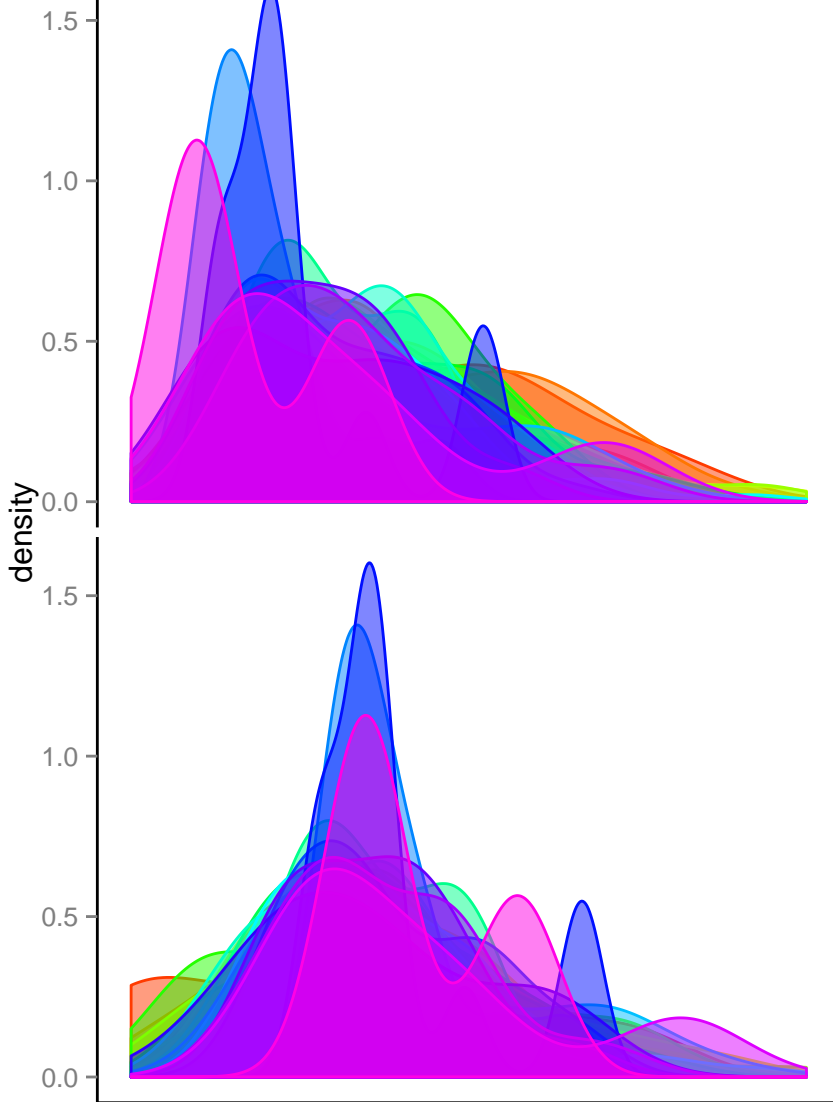

raw

normalized

## PLATFORMRUNDAY\_miss

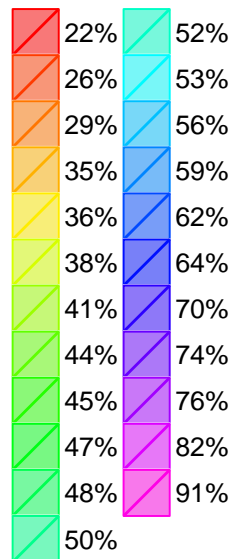

log(ion counts)

# X-12726

runday

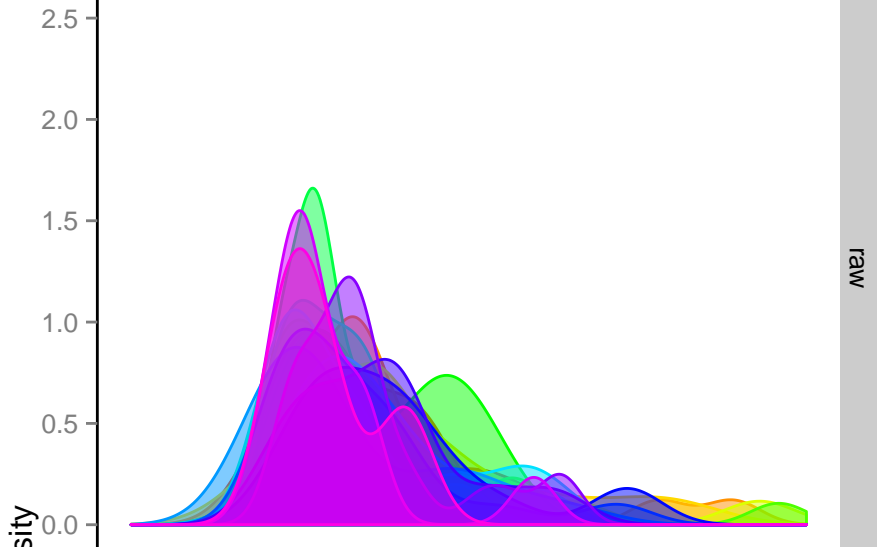

raw

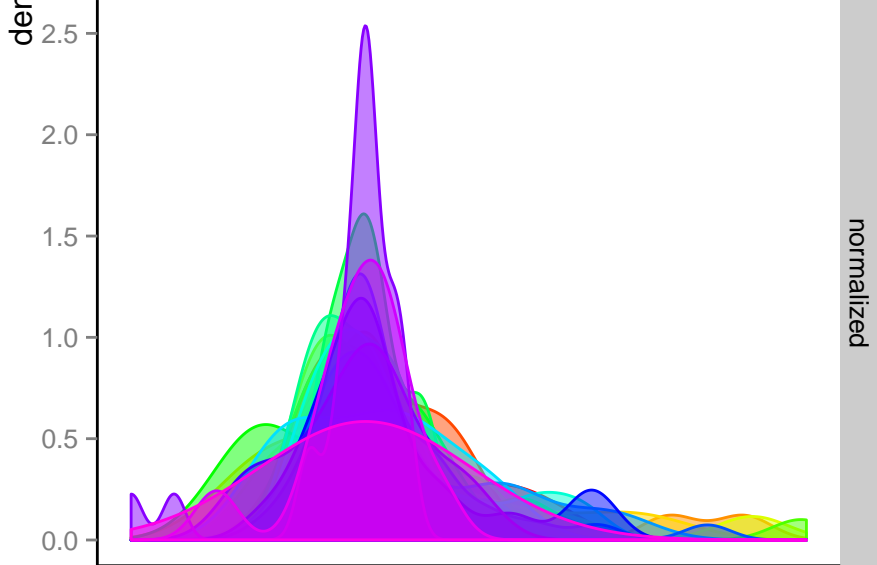

normalized

## PLATFORMRUNDAY\_miss

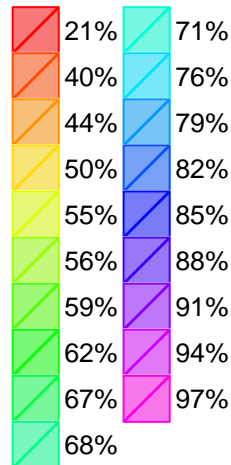

# X-12728

runday

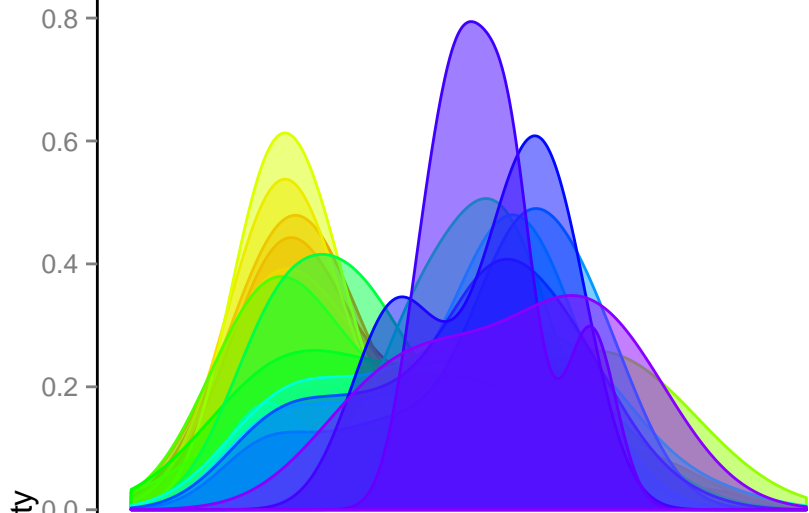

raw

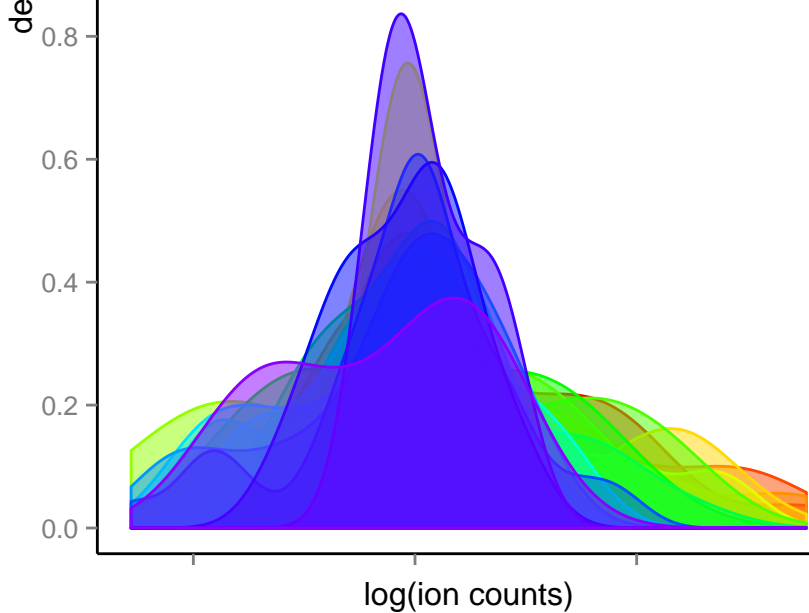

normalized

**PLATFORMRUNDAY\_miss**

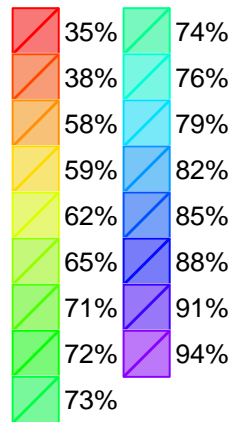

# X-12729

runday

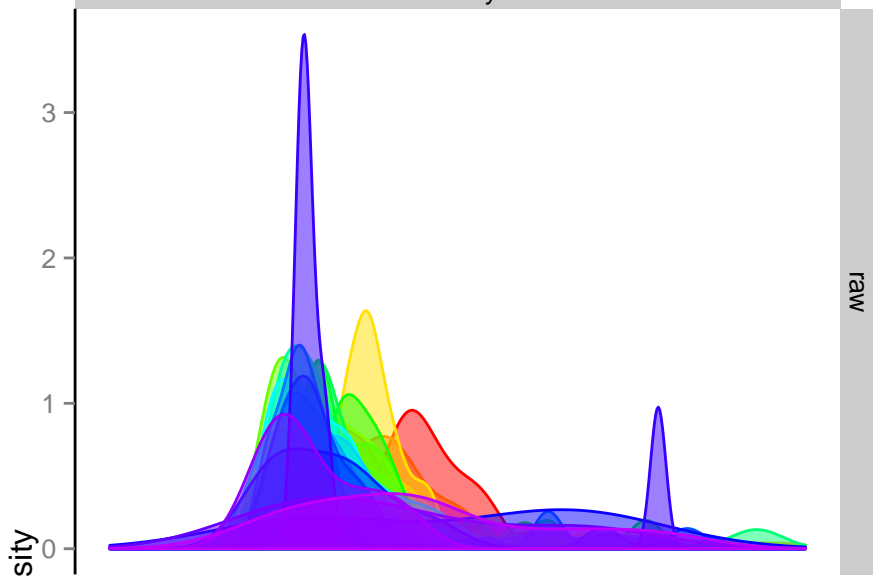

raw

## PLATFORMRUNDAY\_miss

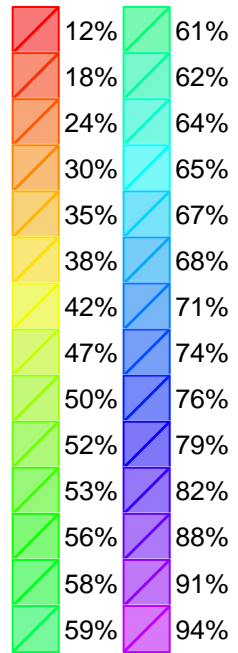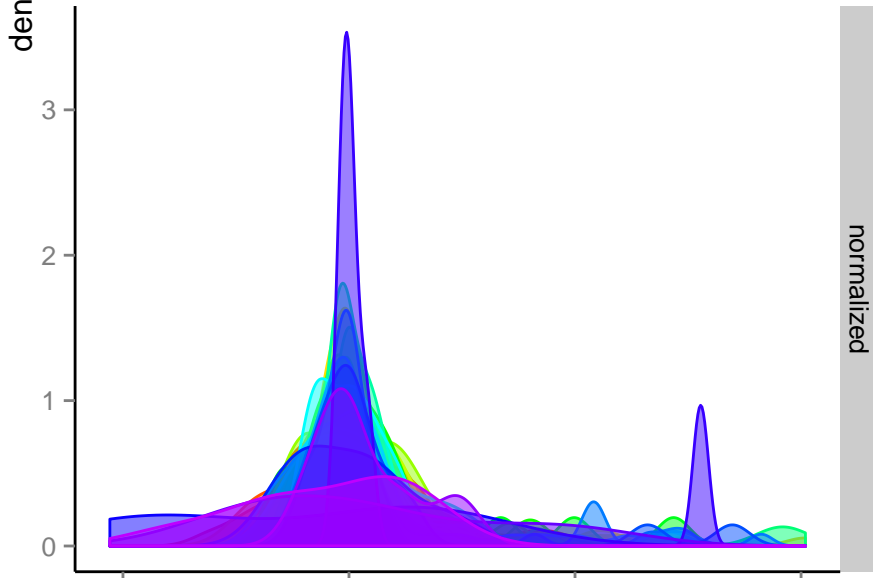

normalized

log(ion counts)



# X-12734

runday

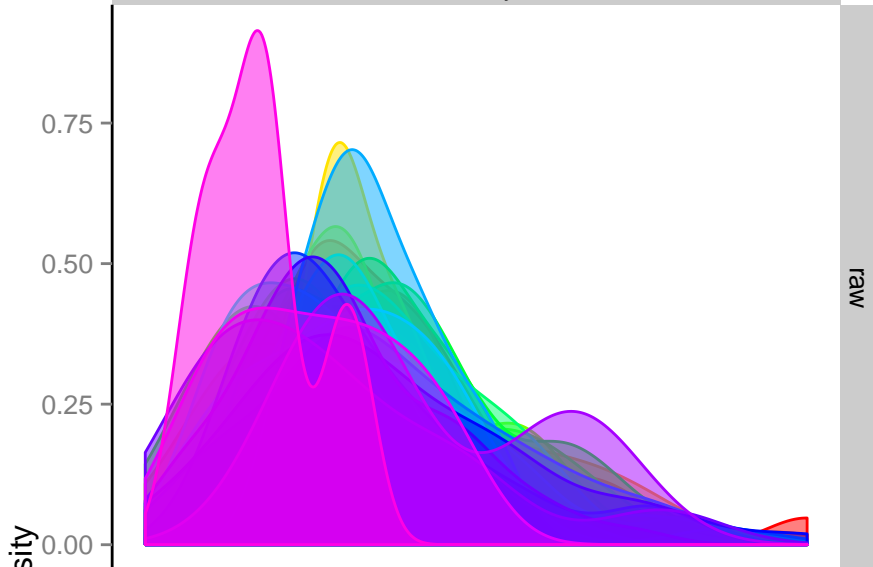

raw

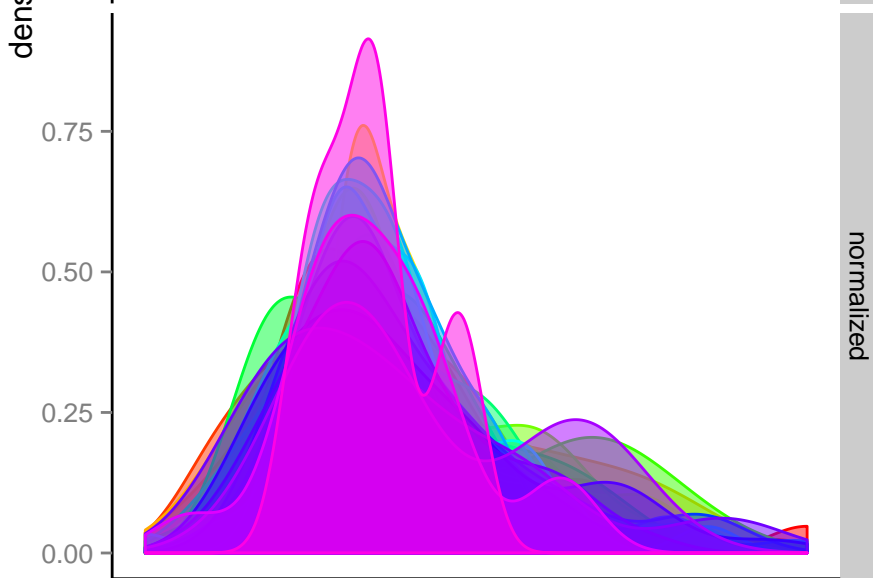

normalized

PLATFORMRUNDAY\_miss

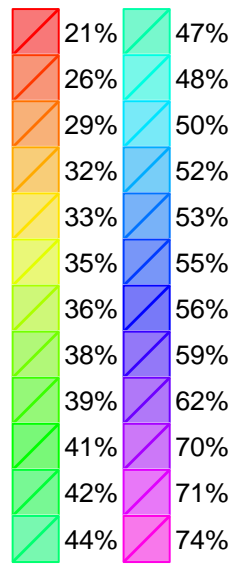

log(ion counts)

# X-12740

runday

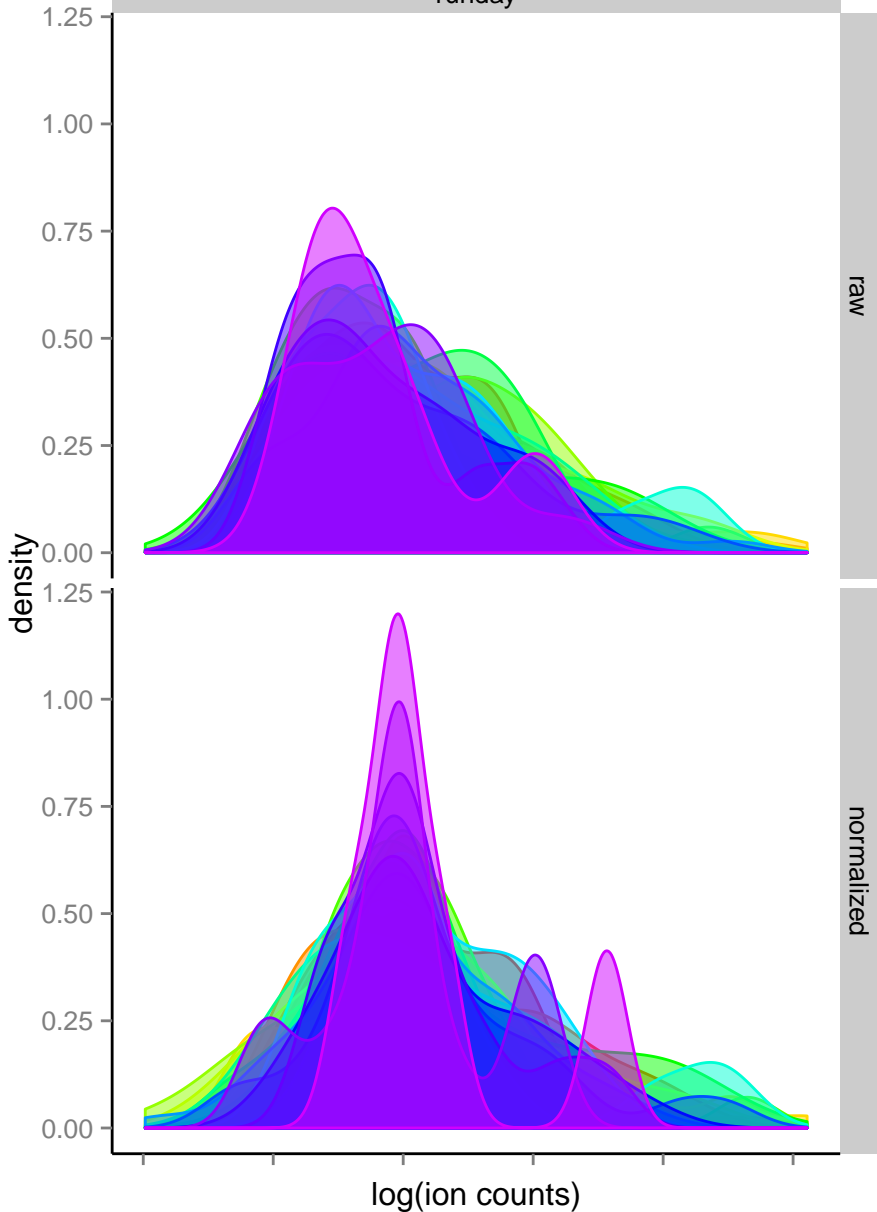

## PLATFORMRUNDAY\_miss

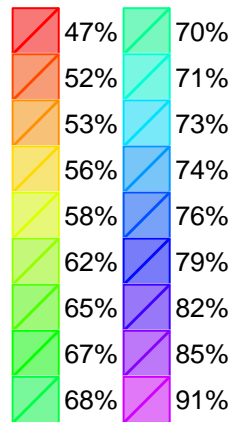

# X-12749

runday

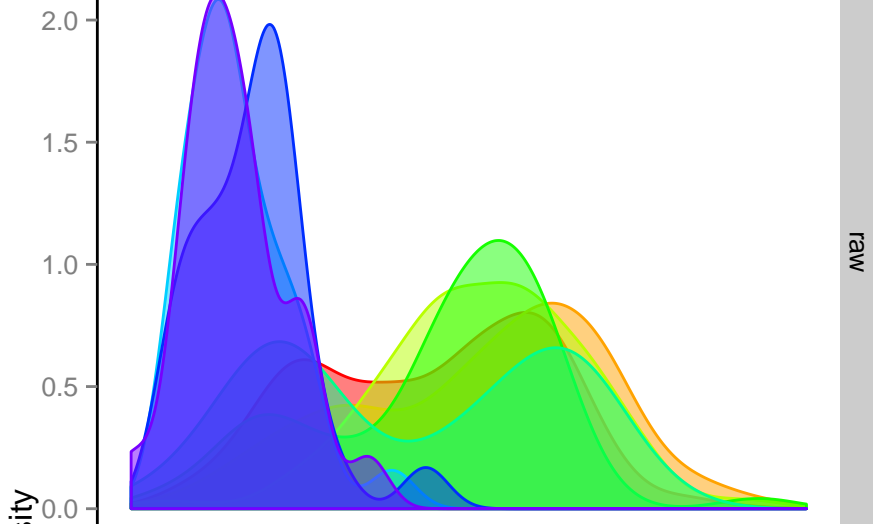

raw

## PLATFORMRUNDAY\_miss

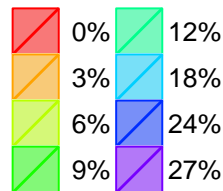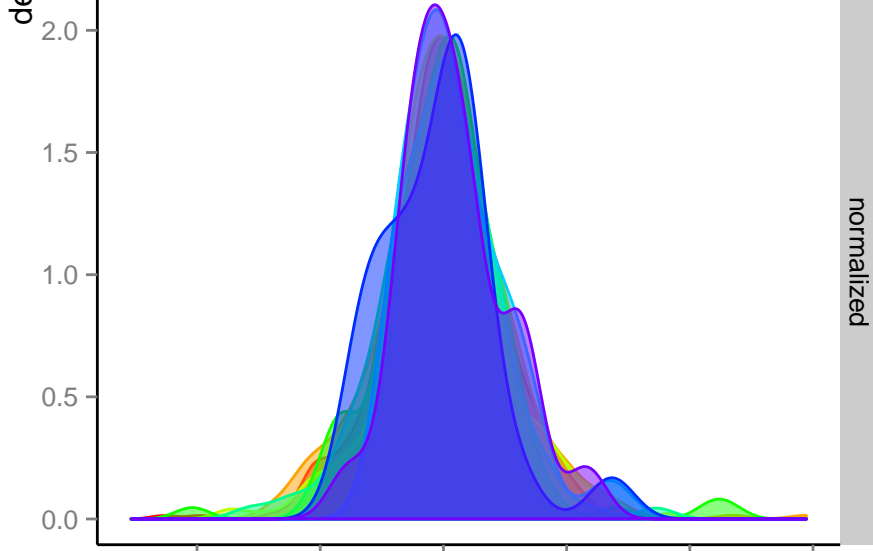

normalized

log(ion counts)

# X-12771

runday

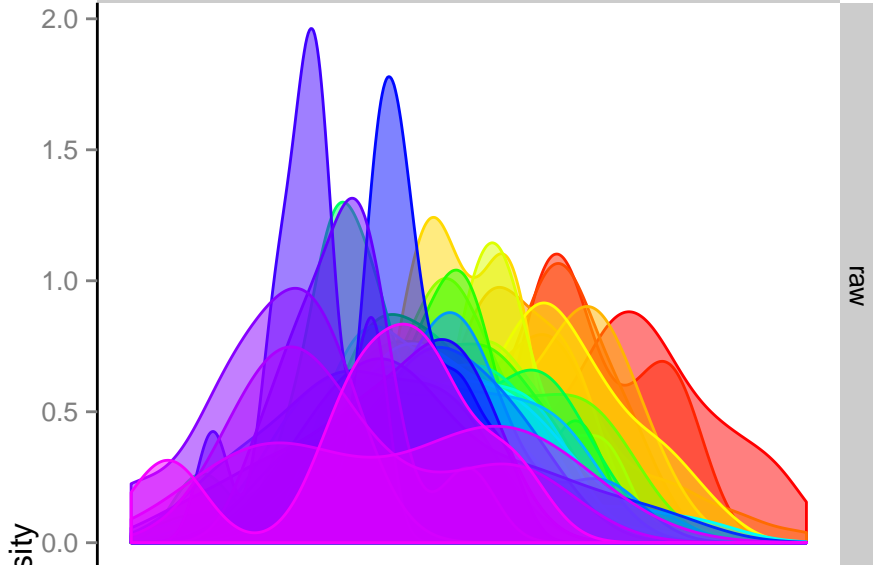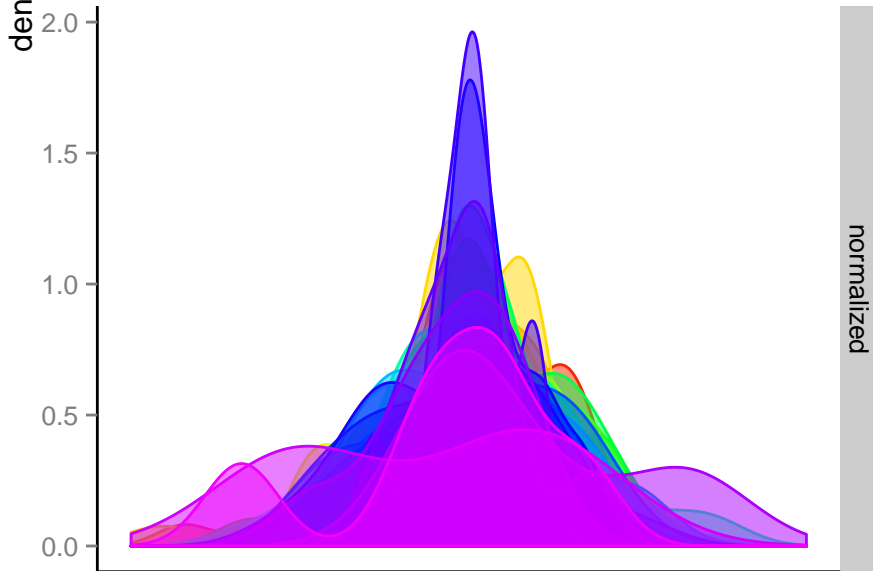

## PLATFORMRUNDAY\_miss

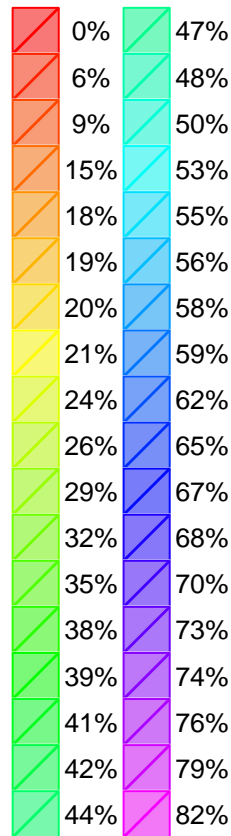

log(ion counts)

X-12776

runday

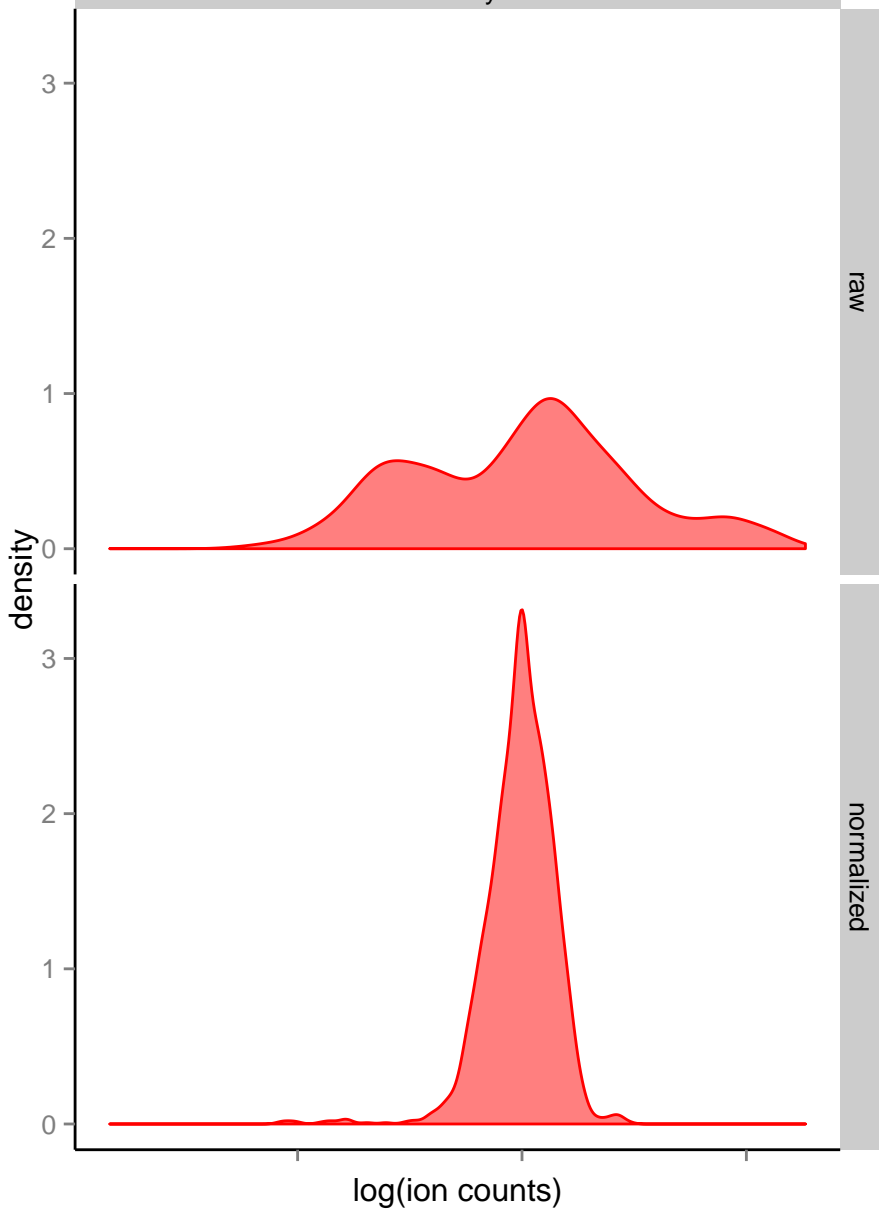

raw

normalized

PLATFORMRUNDAY\_miss

0%

# X-12786

runday

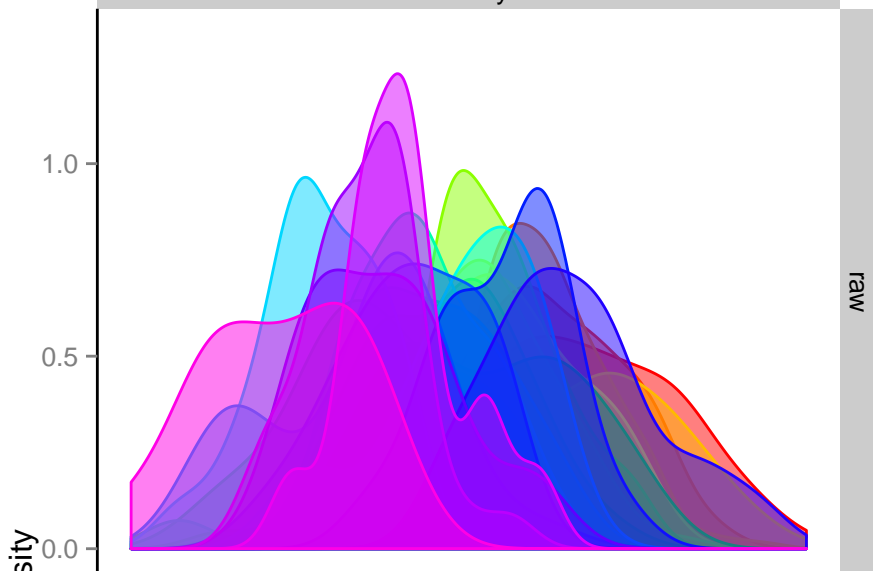

**PLATFORMRUNDAY\_miss**

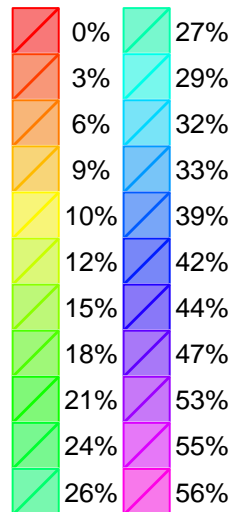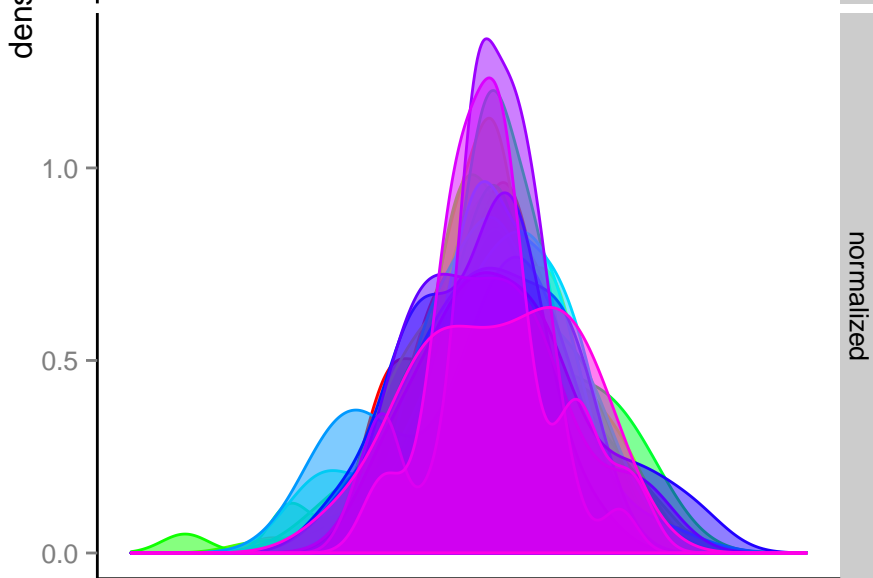

log(ion counts)

# X-12798

runday

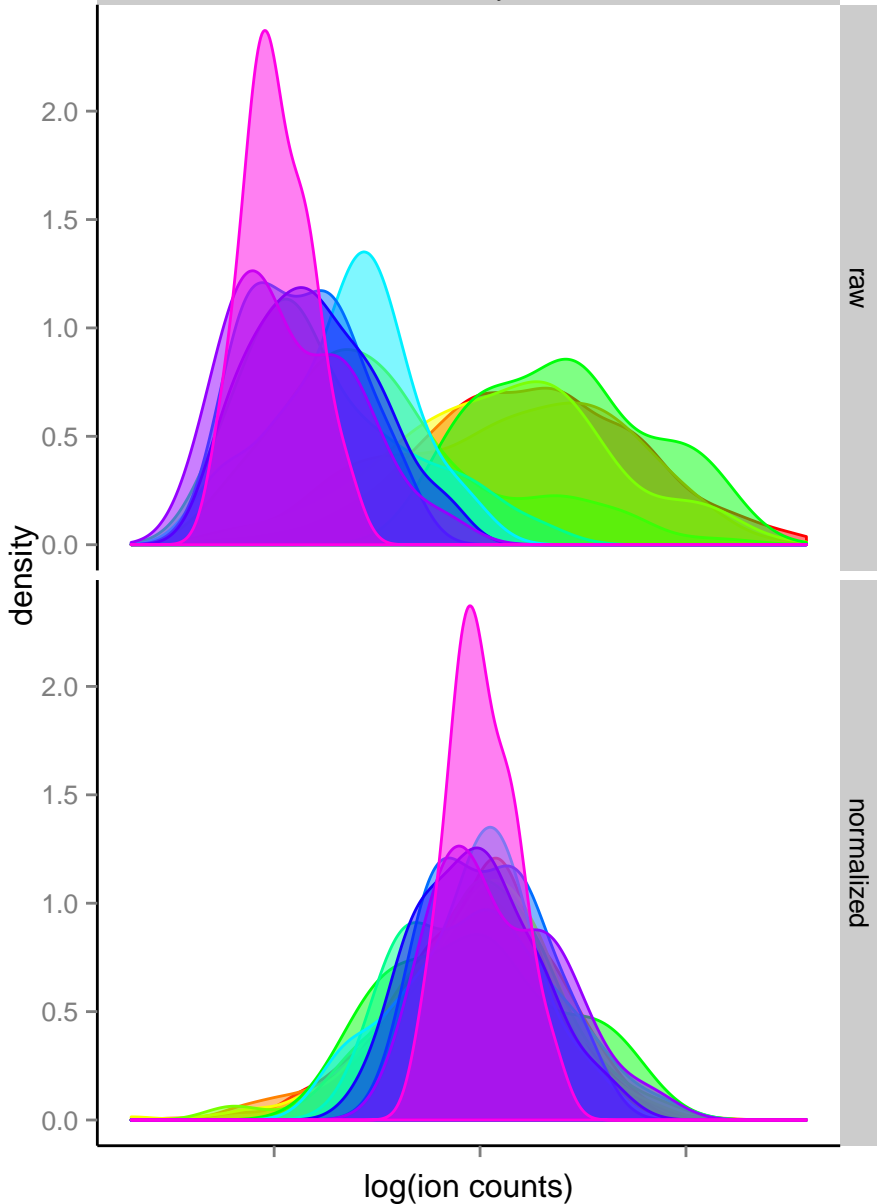

## PLATFORMRUNDAY\_miss

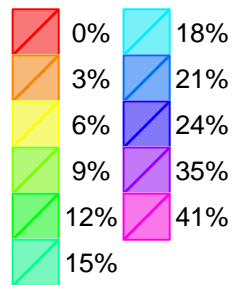

# X-12816

runday

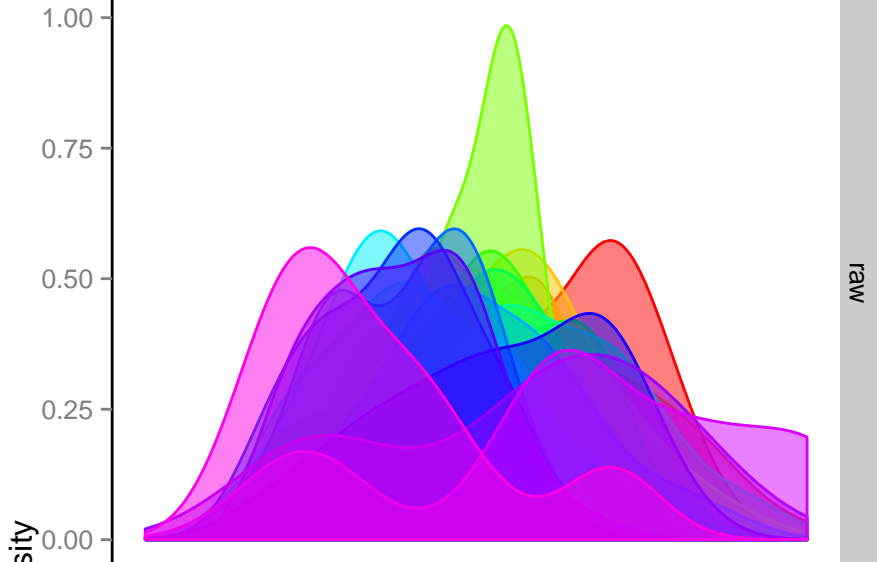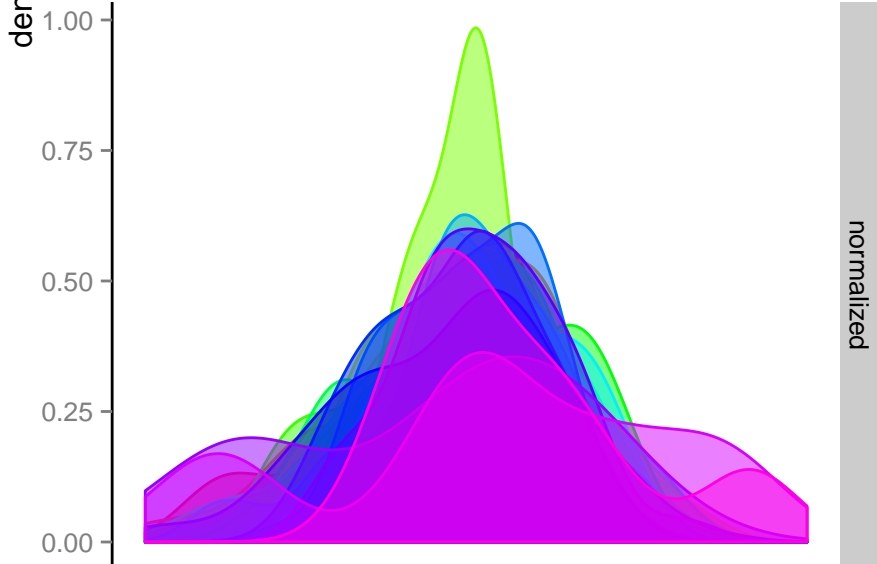

## PLATFORMRUNDAY\_miss

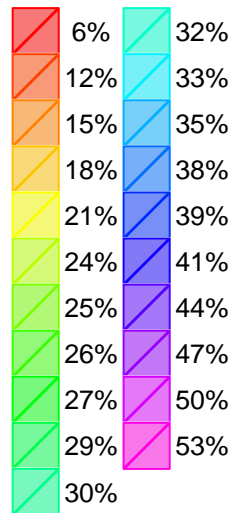

log(ion counts)



# X-12830

runday

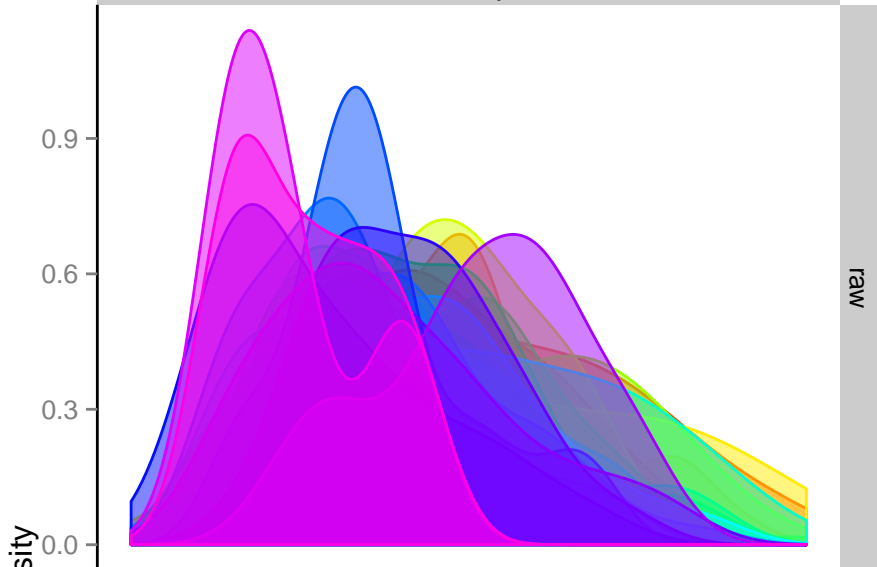

raw

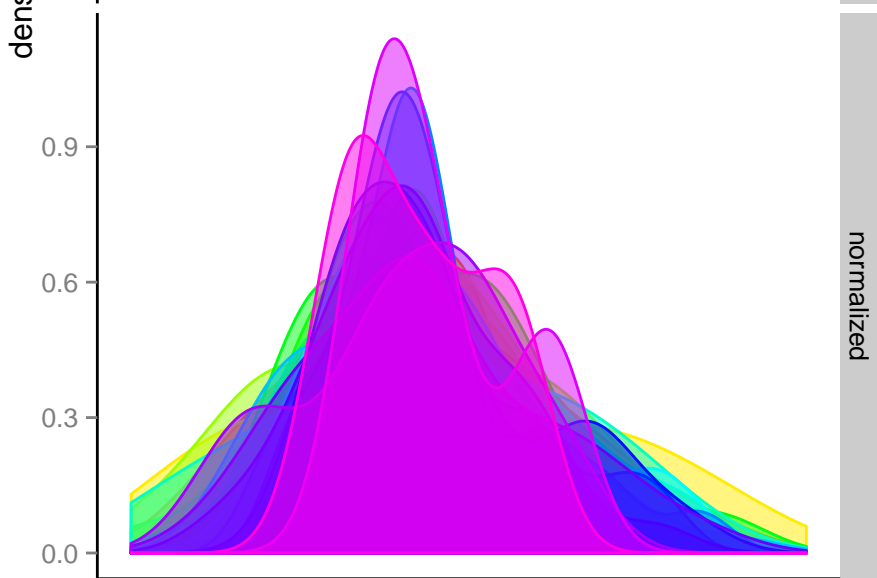

normalized

PLATFORMRUNDAY\_miss

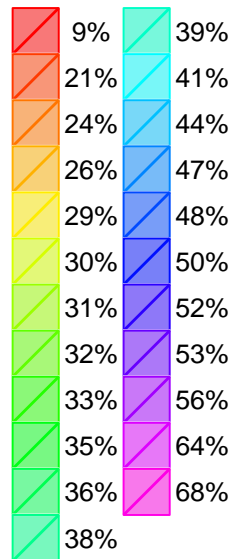

# X-12833

runday

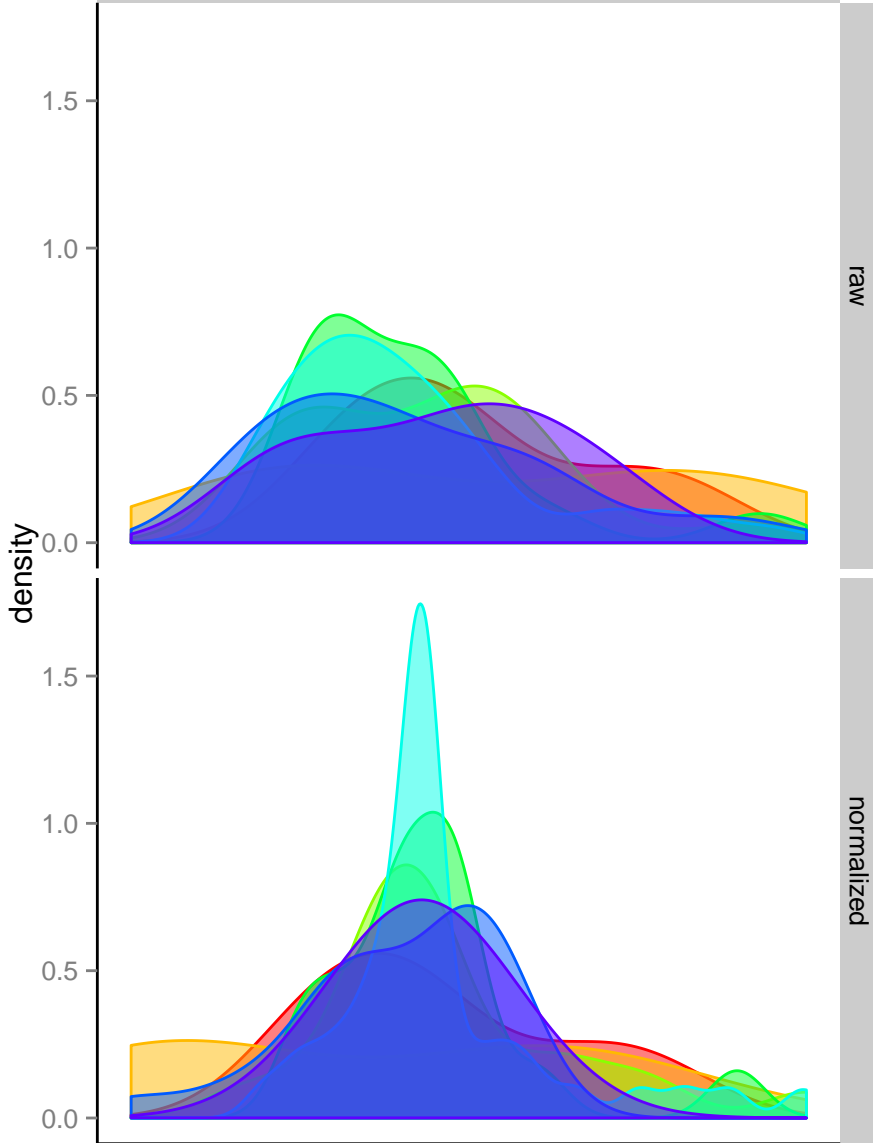

raw

normalized

## PLATFORMRUNDAY\_miss

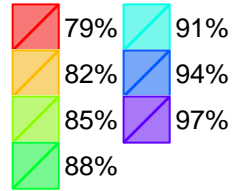

X-12844

runday

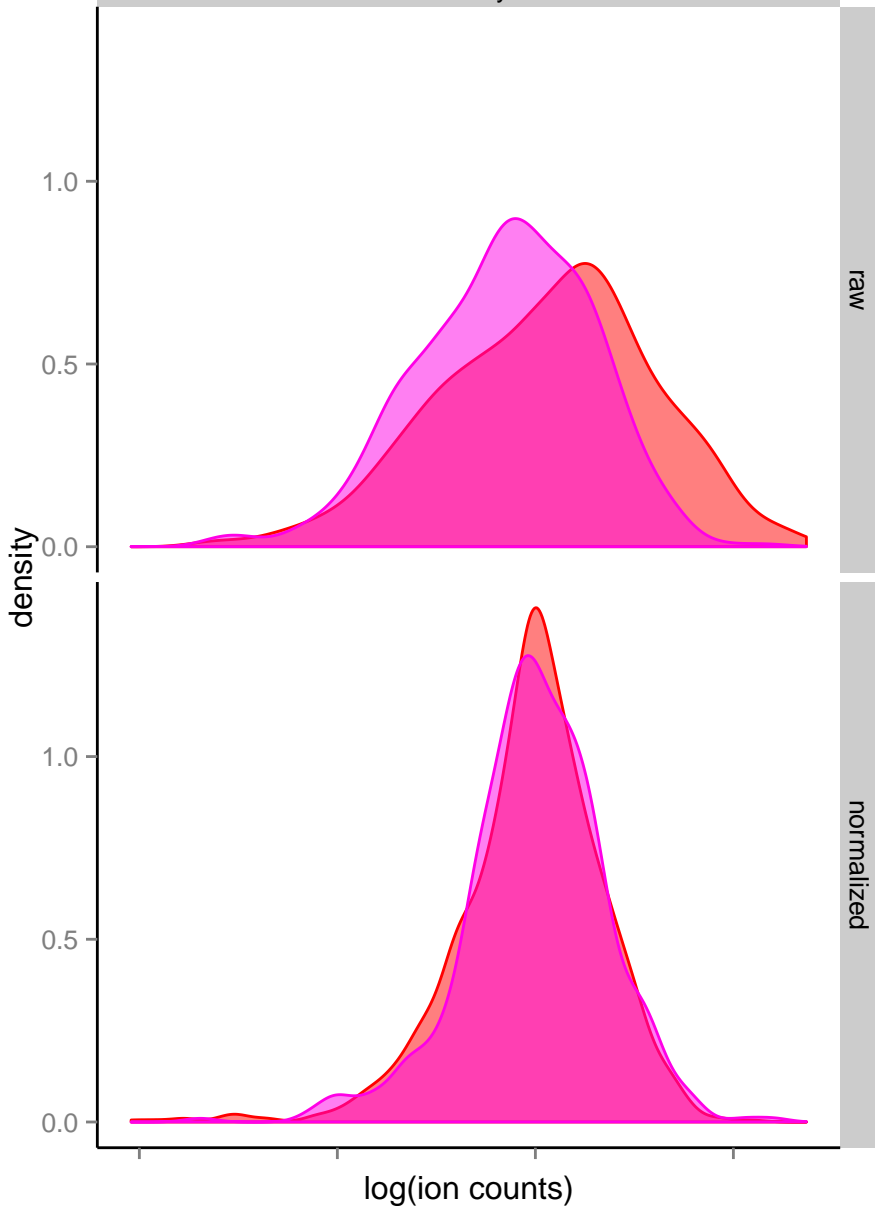

raw

normalized

PLATFORMRUNDAY\_miss



0%



3%

# X-12847

runday

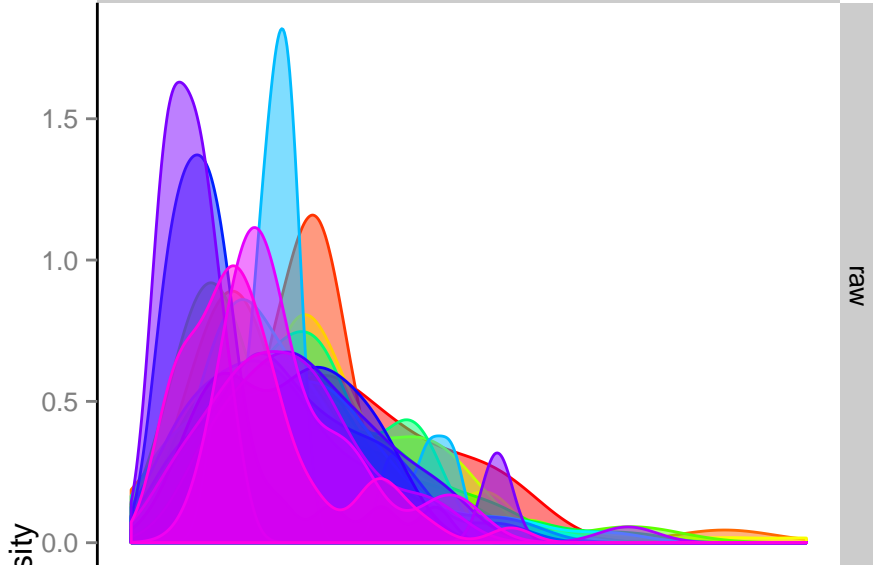

raw

## PLATFORMRUNDAY\_miss

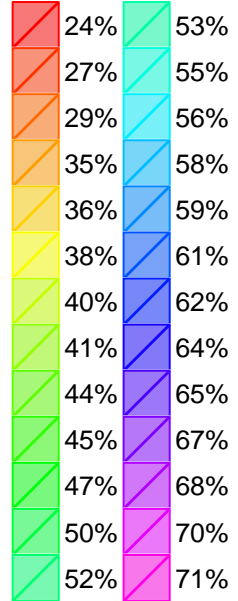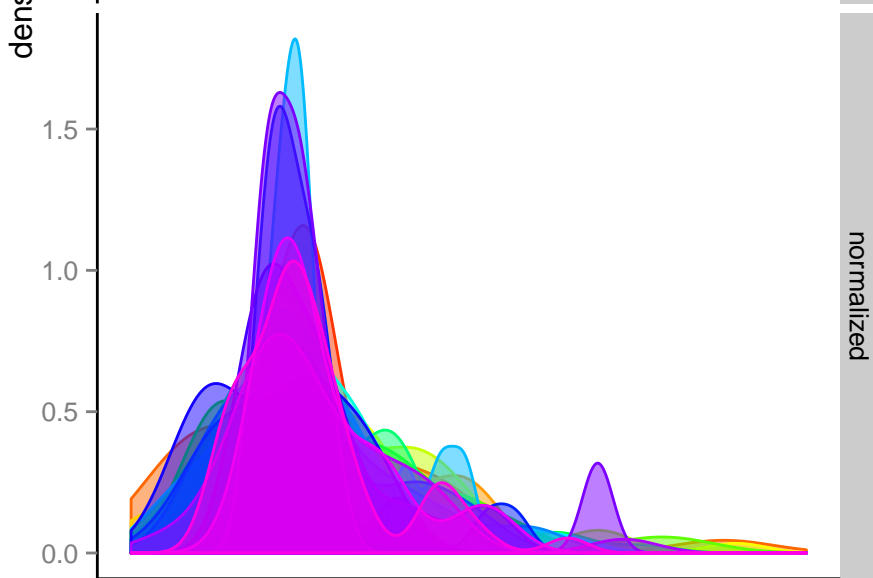

normalized

log(ion counts)

# X-12850

runday

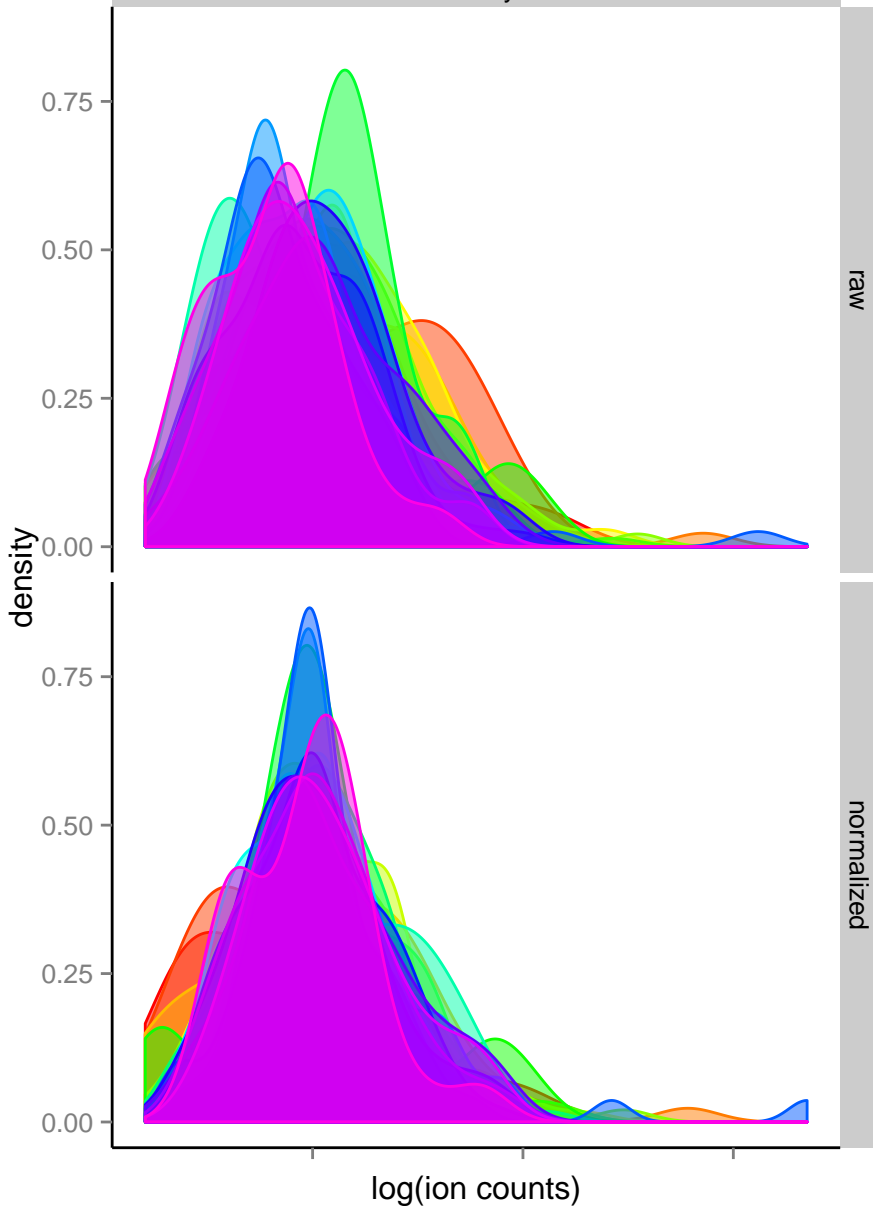

## PLATFORMRUNDAY\_miss

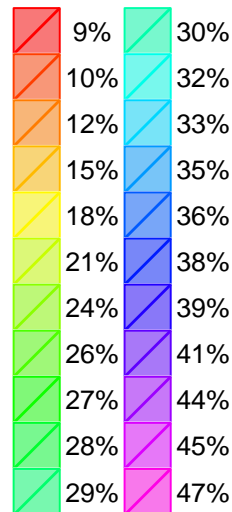

# X-12851

runday

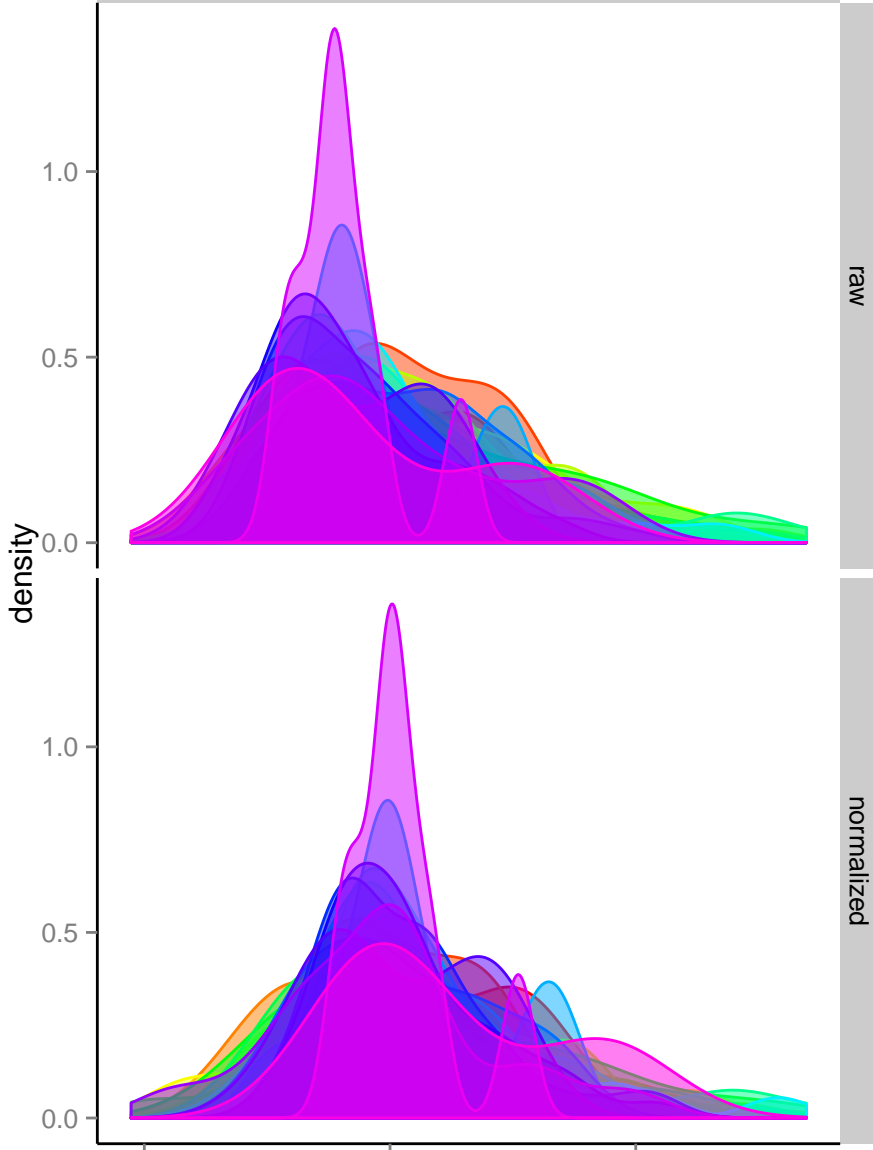

## PLATFORMRUNDAY\_miss

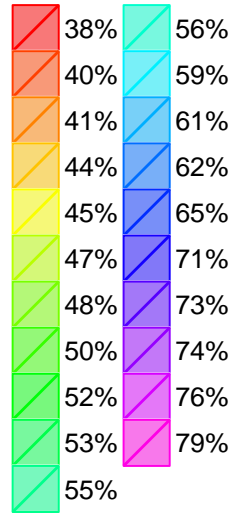

# X-12855

runday

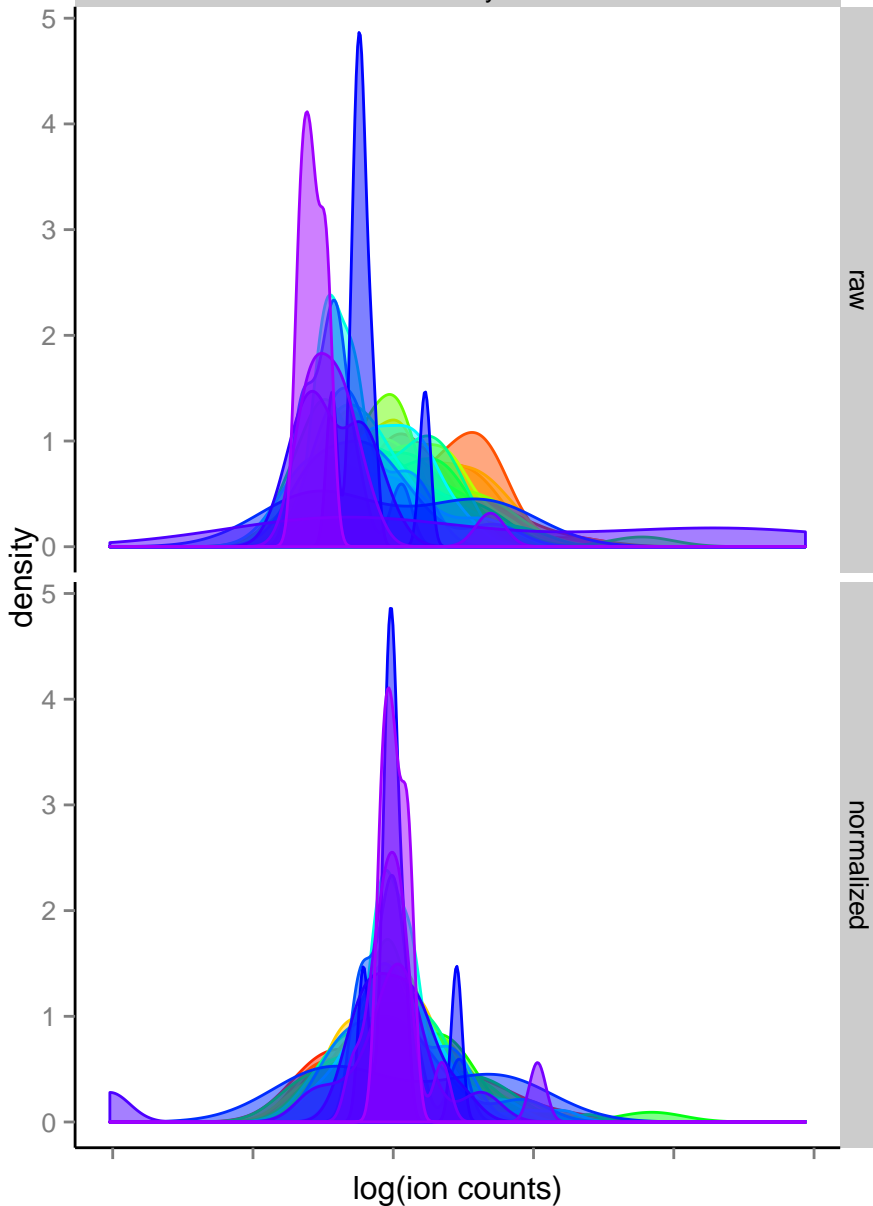

## PLATFORMRUNDAY\_miss

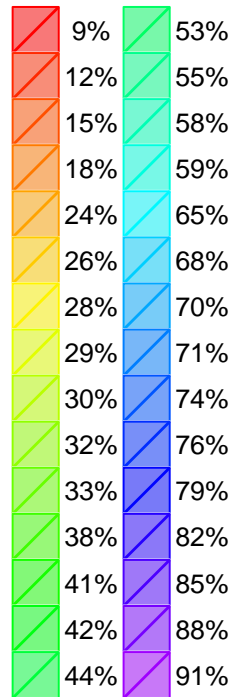

# docosapentaenoic acid (n6-DPA)

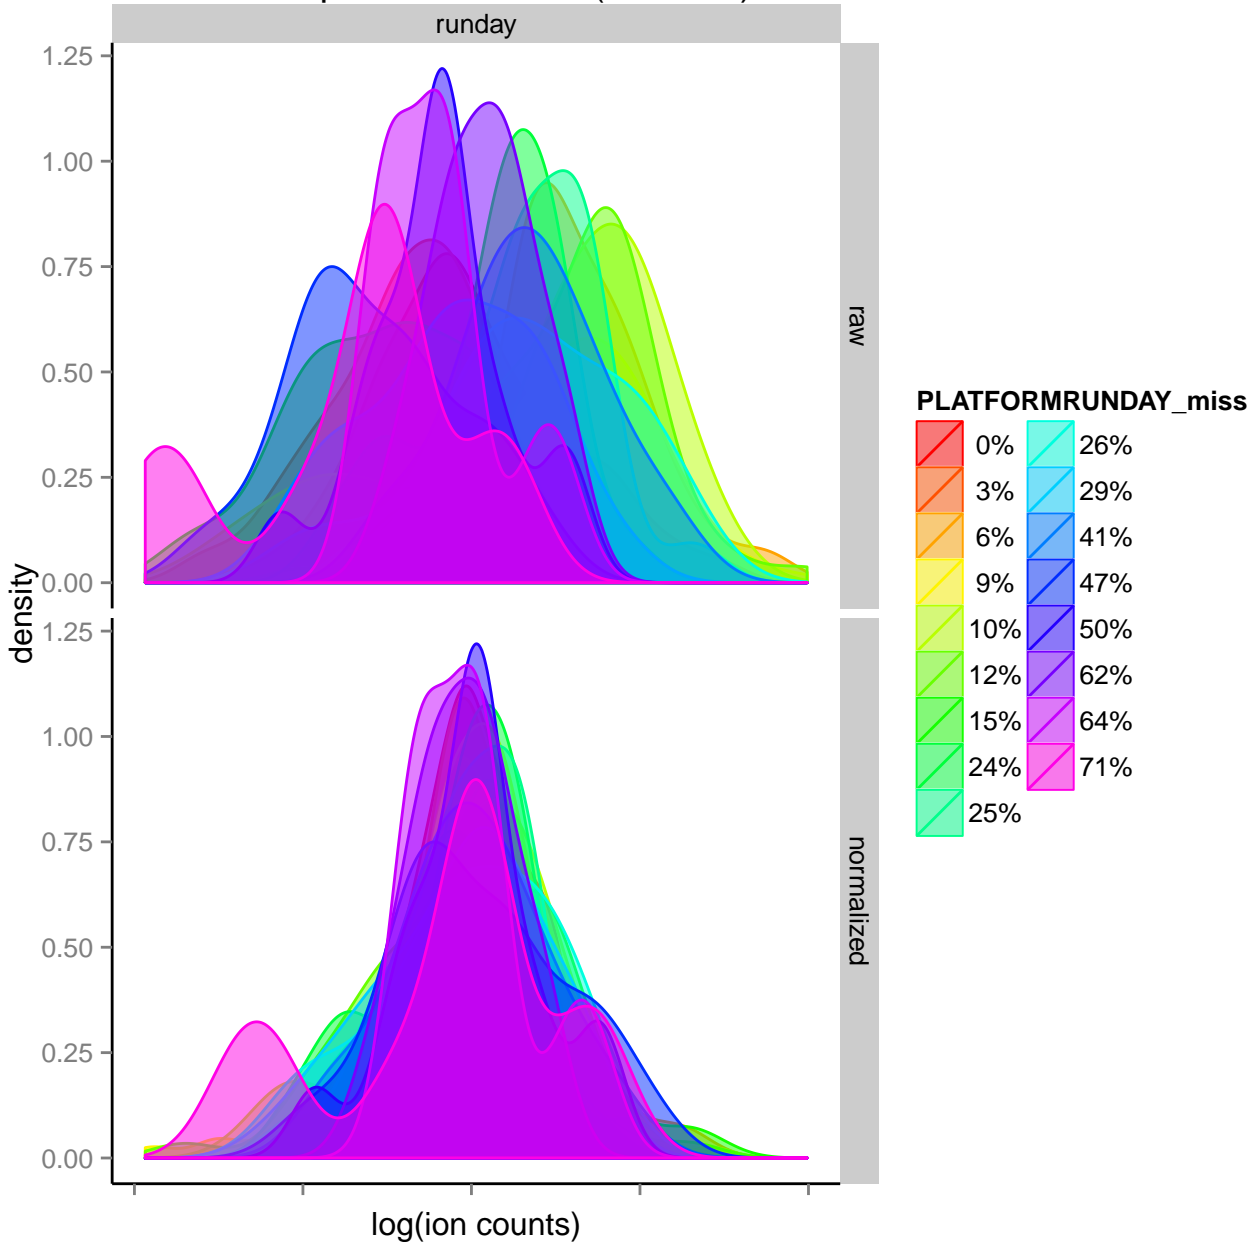



# X-13069

runday

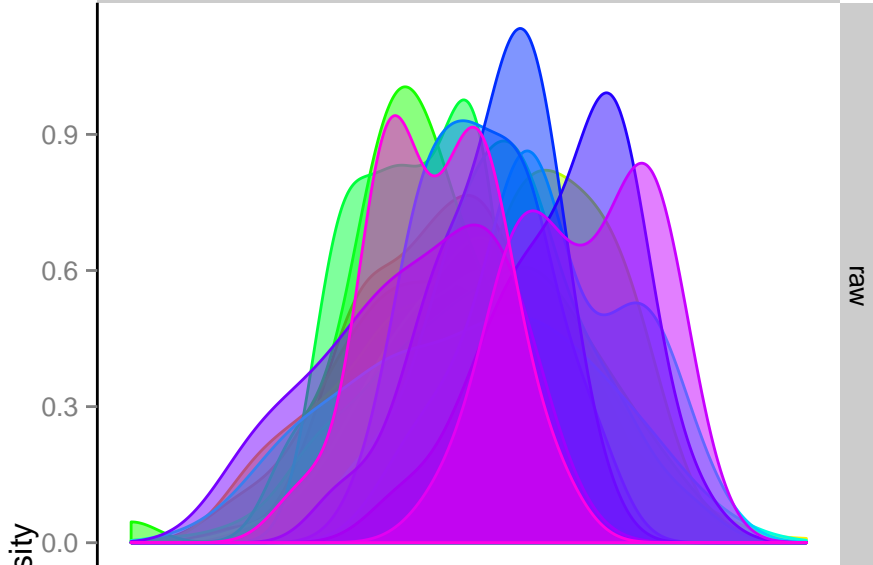

raw

**PLATFORMRUNDAY\_miss**

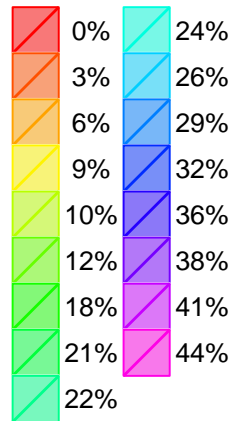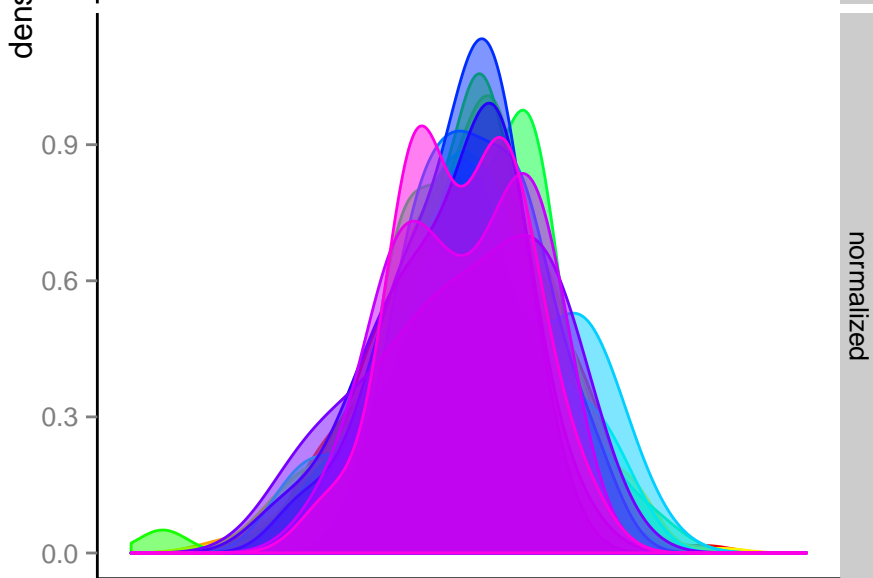

normalized

log(ion counts)

# stearamide

runday

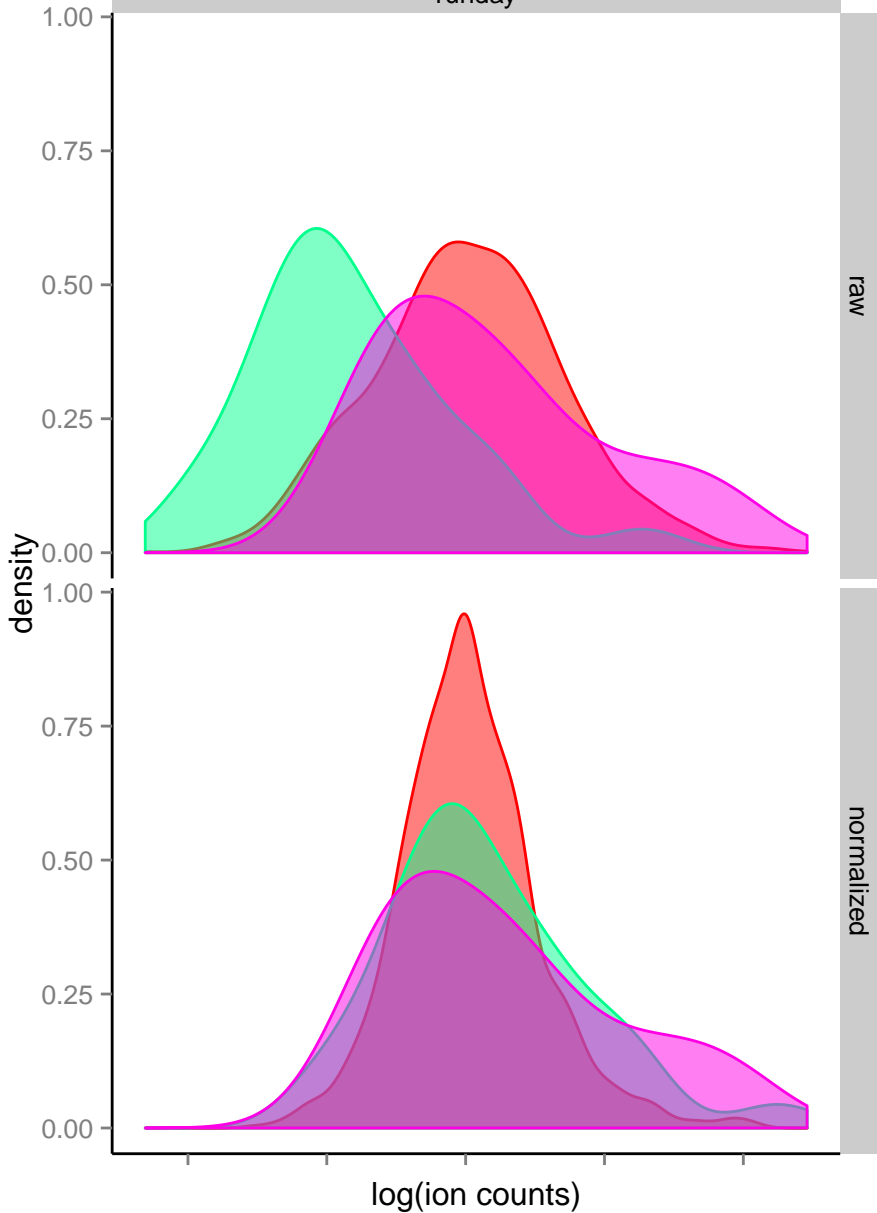

raw

normalized

**PLATFORMRUNDAY\_miss**

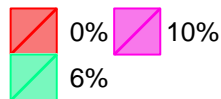

# X-13215

runday

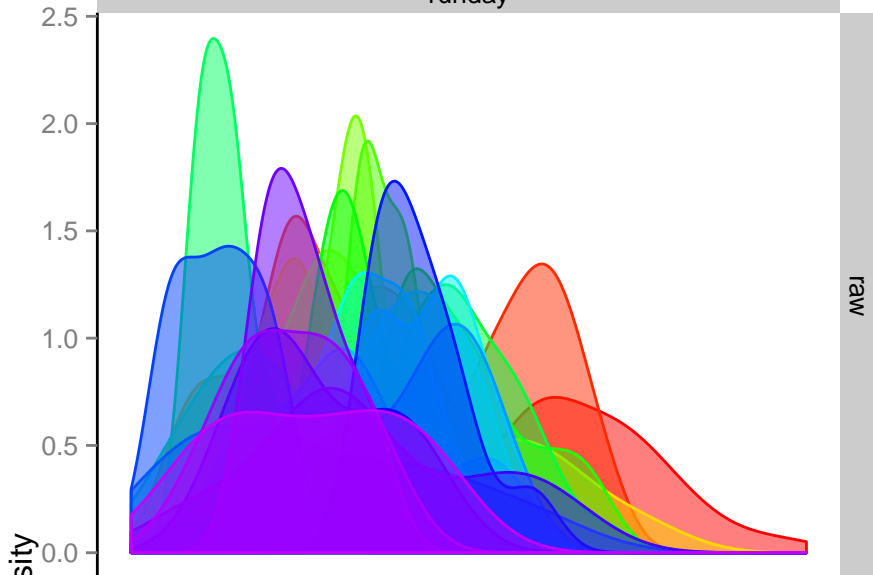

raw

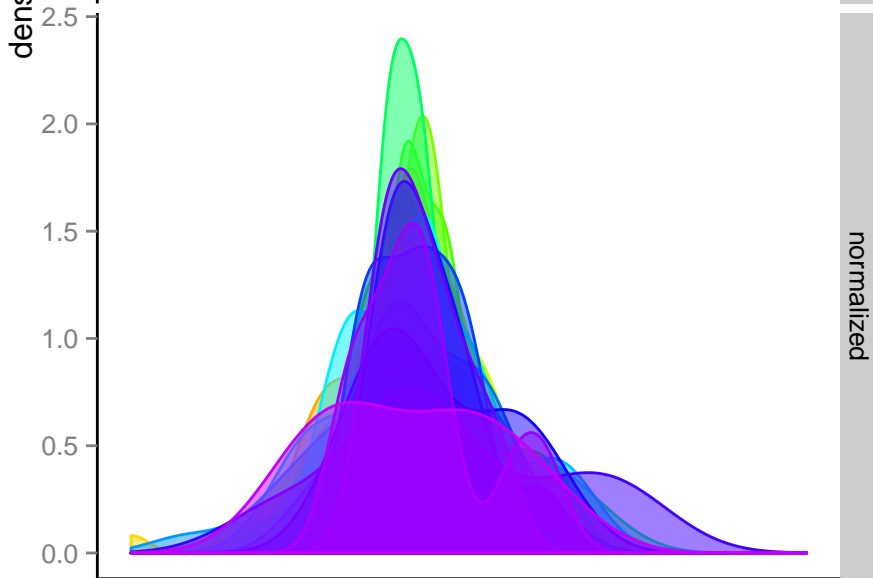

normalized

## PLATFORMRUNDAY\_miss

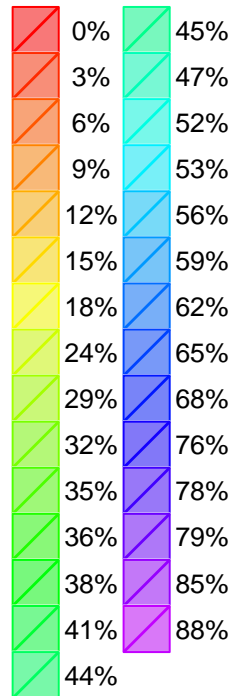

# X-13372

## runday

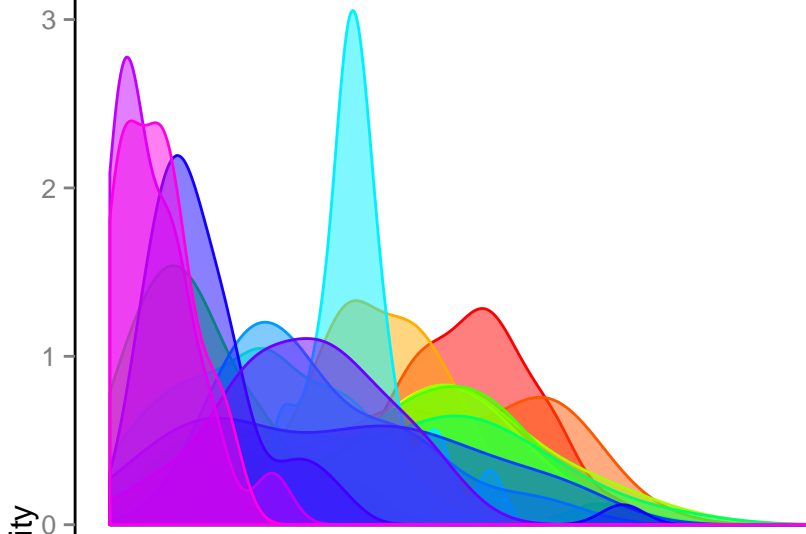

raw

**PLATFORMRUNDAY\_miss**

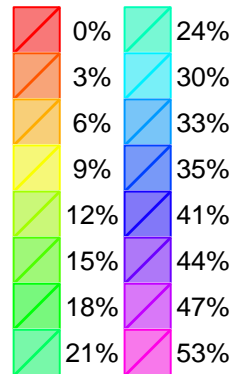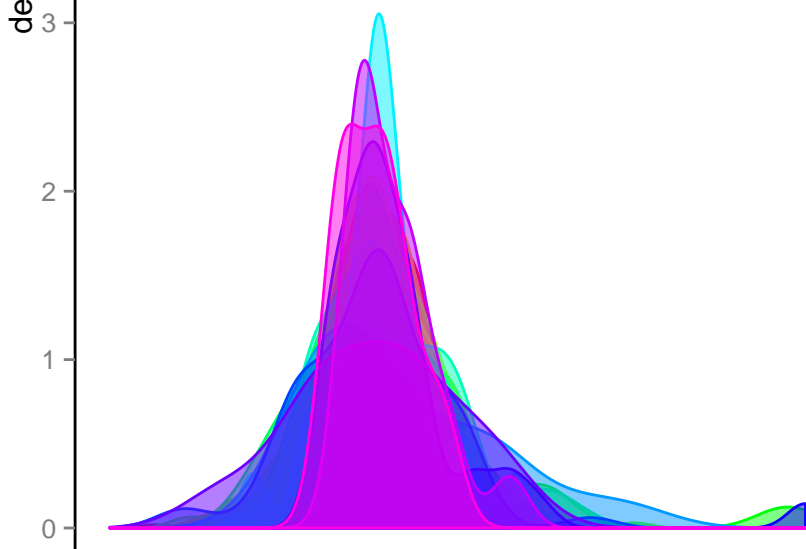

normalized

log(ion counts)

# X-13429

runday

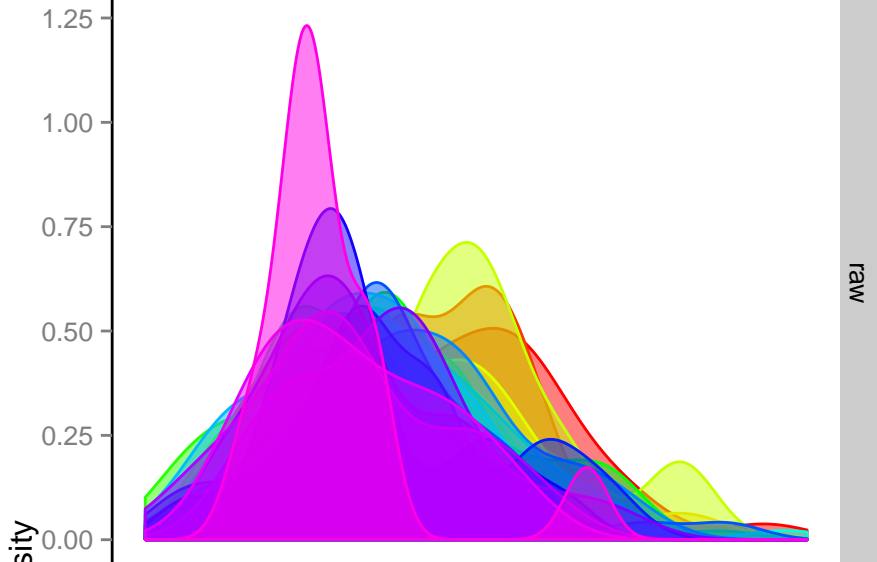

raw

## PLATFORMRUNDAY\_miss

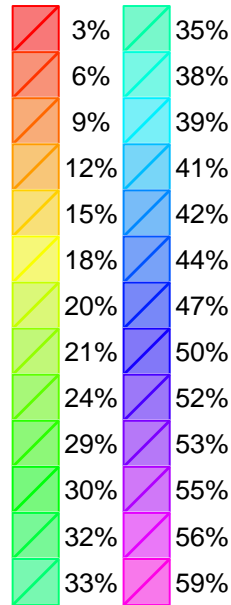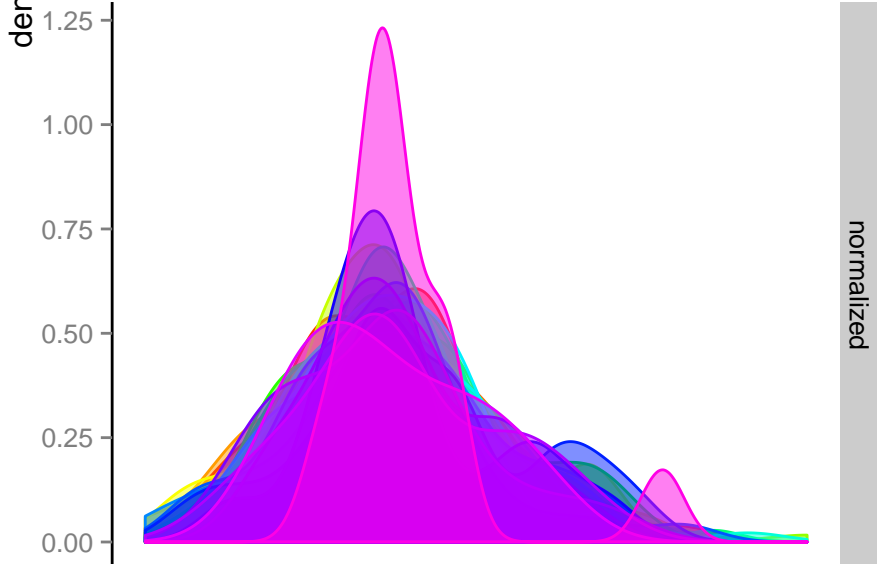

normalized

log(ion counts)

# nonanoylcarnitine\*

runday

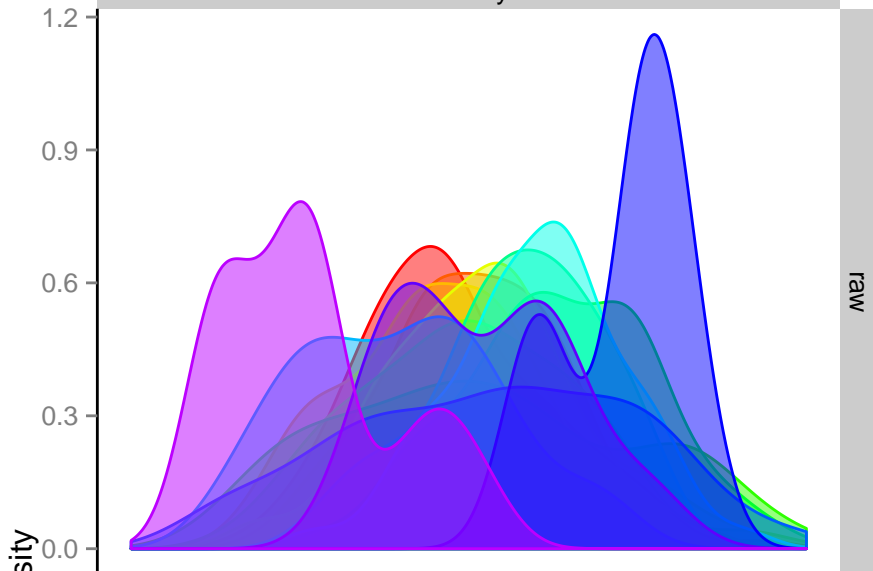

**PLATFORMRUNDAY\_miss**

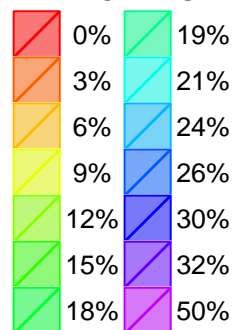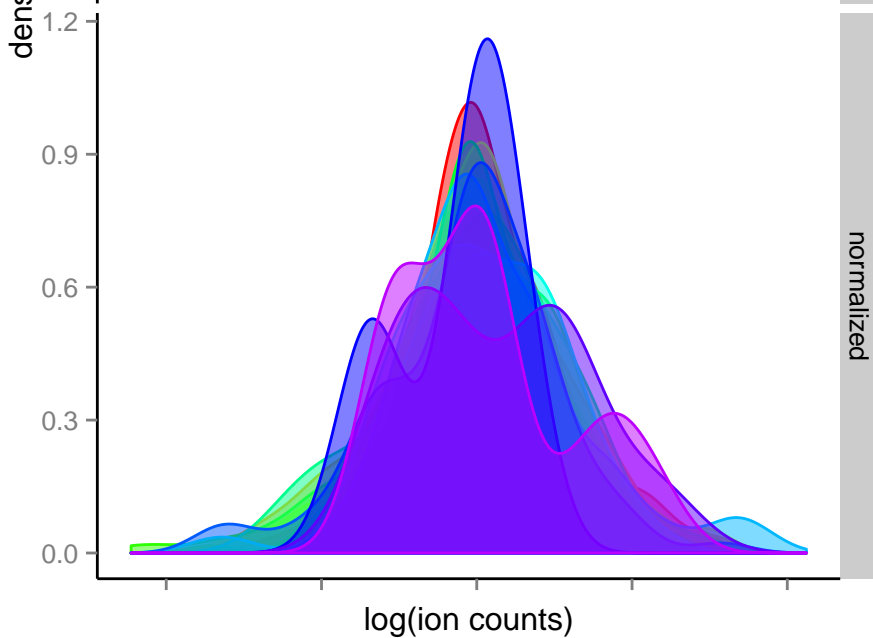

# X-13435

runday

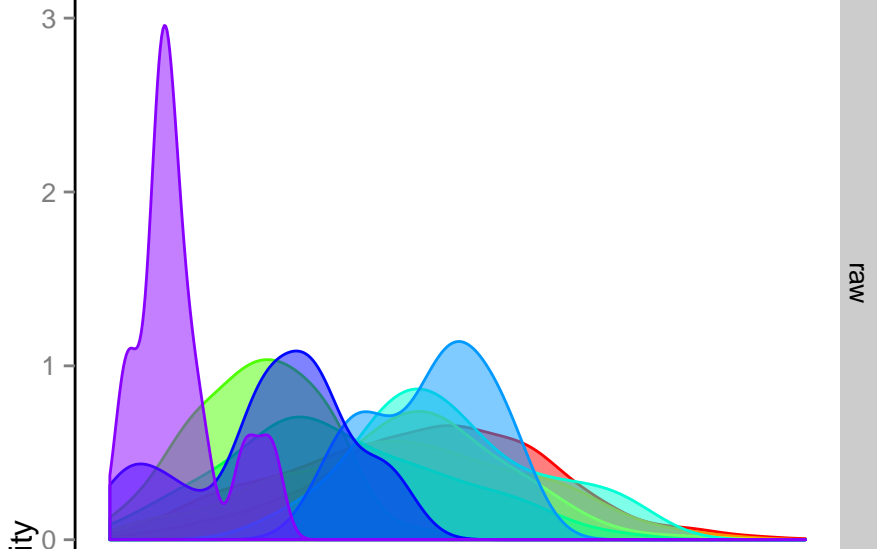

raw

## PLATFORMRUNDAY\_miss

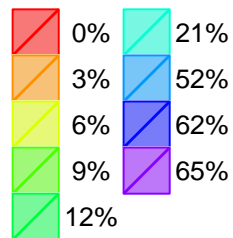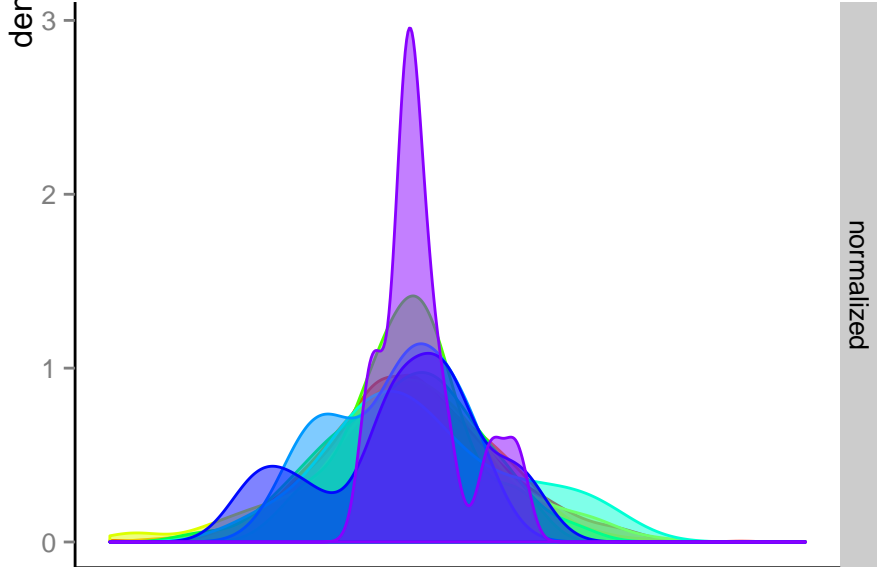

normalized

log(ion counts)

# X-13477

runday

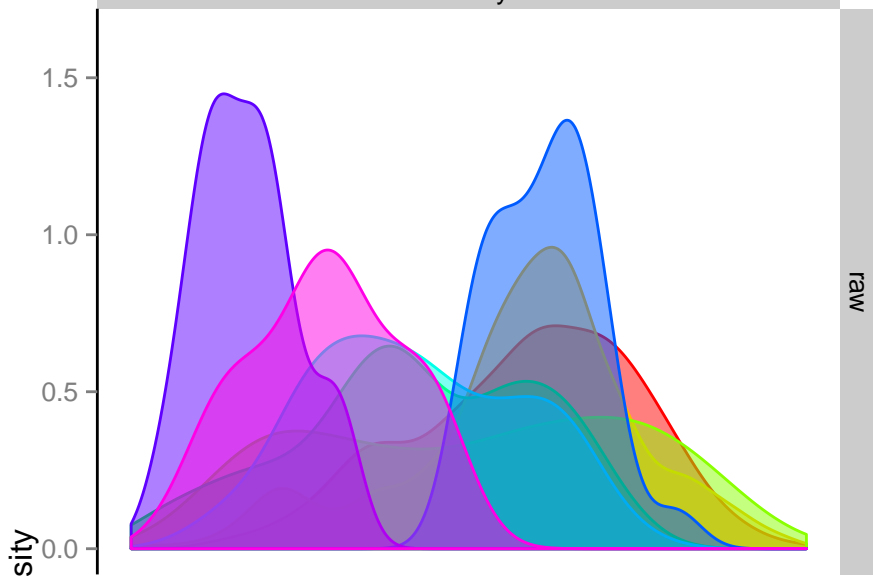

raw

## PLATFORMRUNDAY\_miss

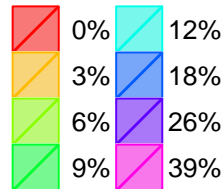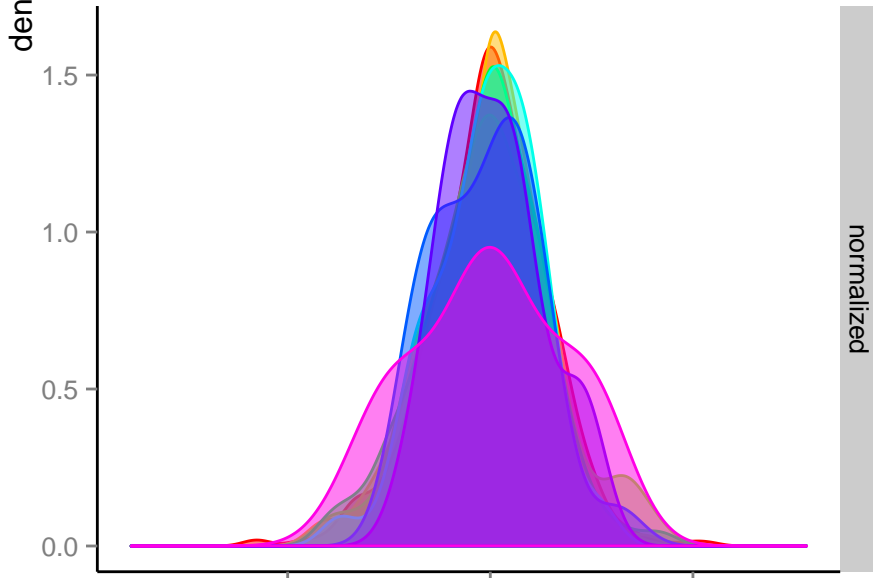

normalized

log(ion counts)



# X-13496

runday

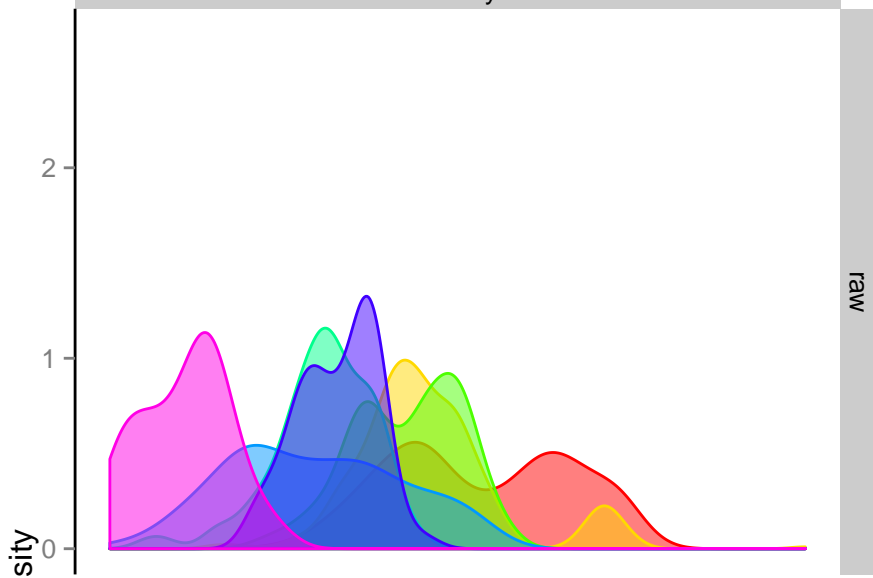

raw

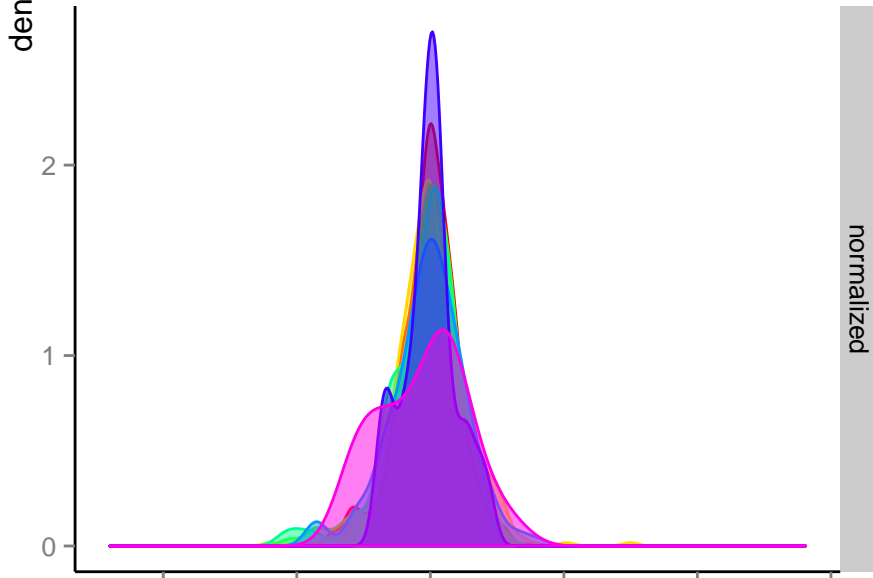

normalized

## PLATFORMRUNDAY\_miss

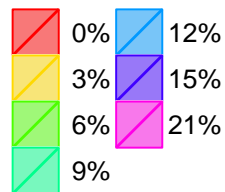

log(ion counts)

# X-13548

runday

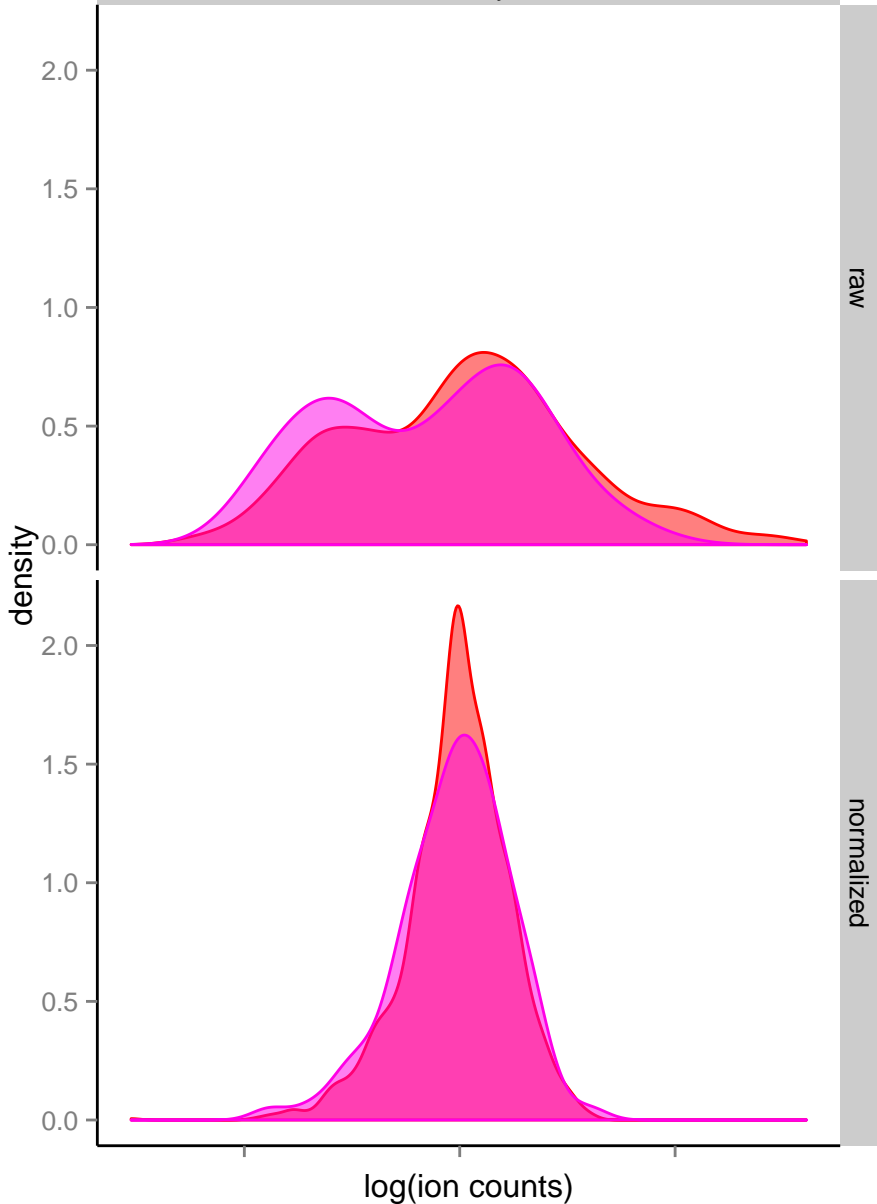

raw

normalized

**PLATFORMRUNDAY\_miss**



0%

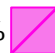

3%

# X-13549

runday

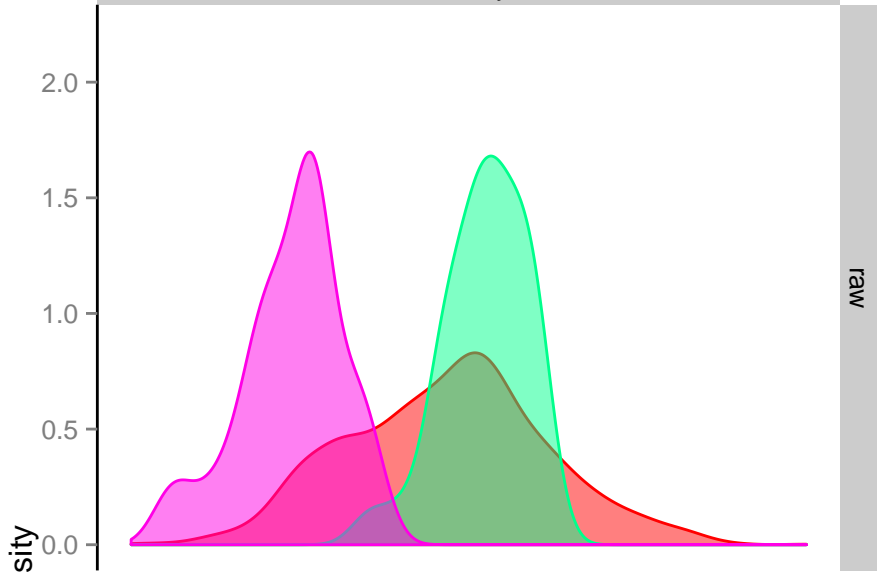

raw

**PLATFORMRUNDAY\_miss**

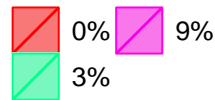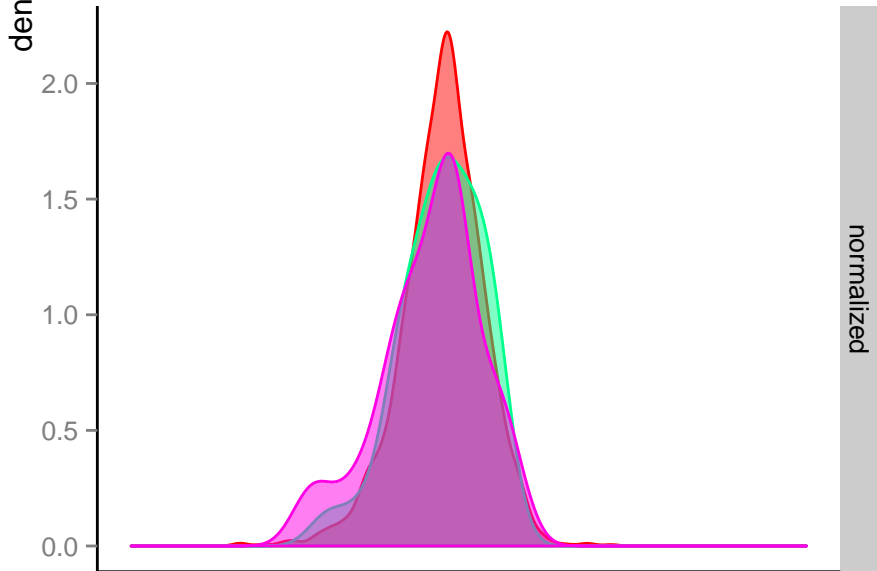

normalized

log(ion counts)

# X-13553

runday

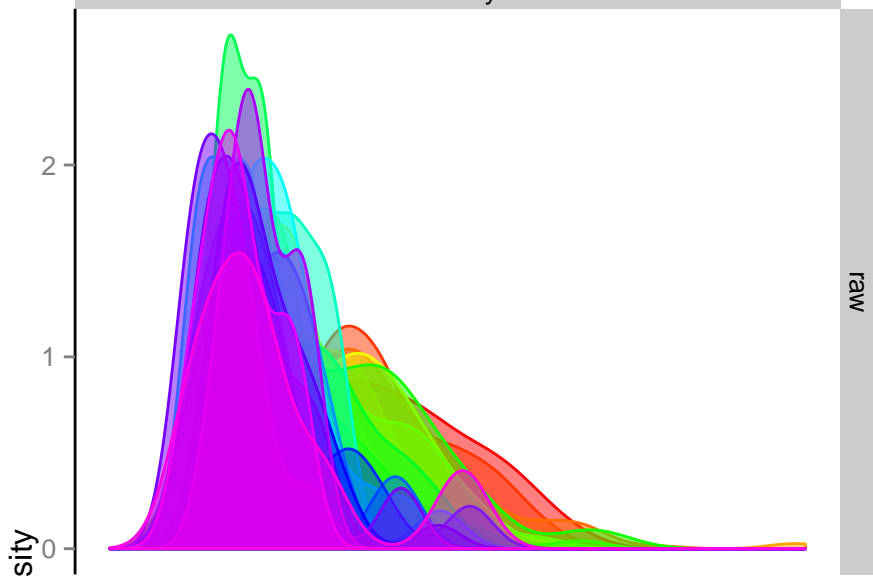

raw

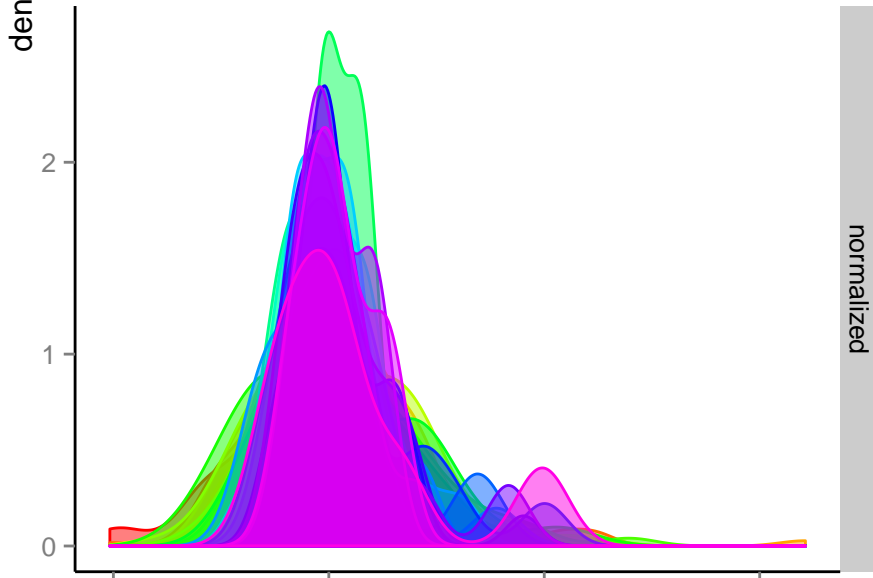

normalized

## PLATFORMRUNDAY\_miss

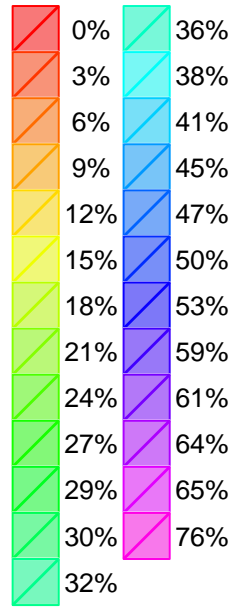

log(ion counts)

X-13619

runday

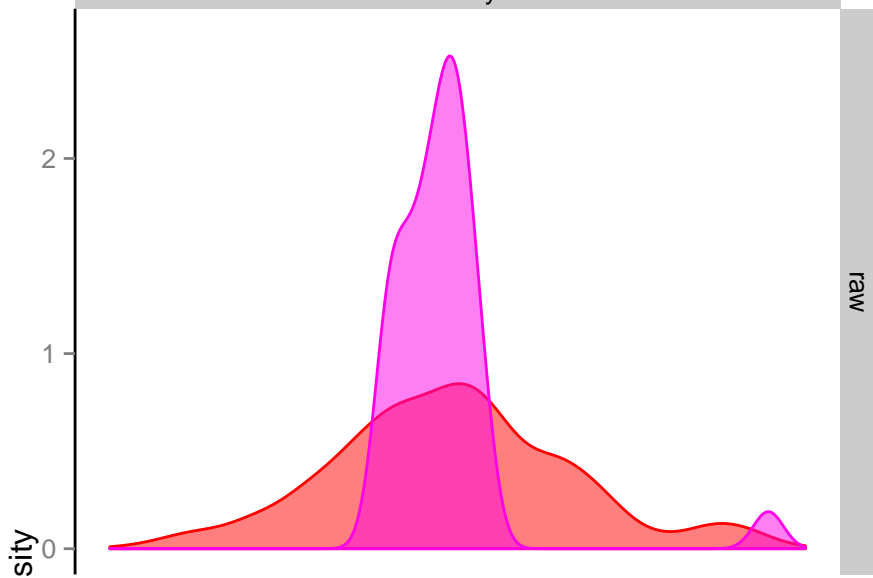

raw

PLATFORMRUNDAY\_miss



0%



3%

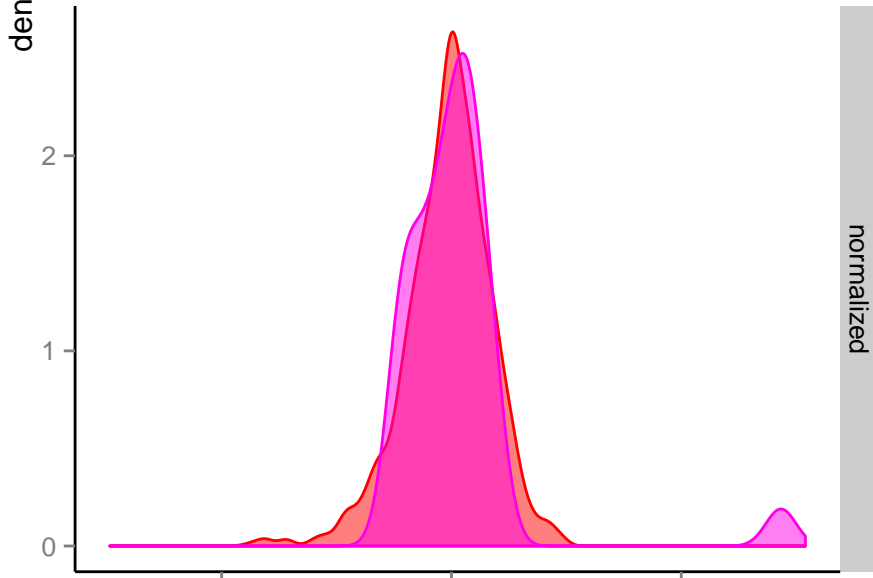

normalized

log(ion counts)

# X-13640

runday

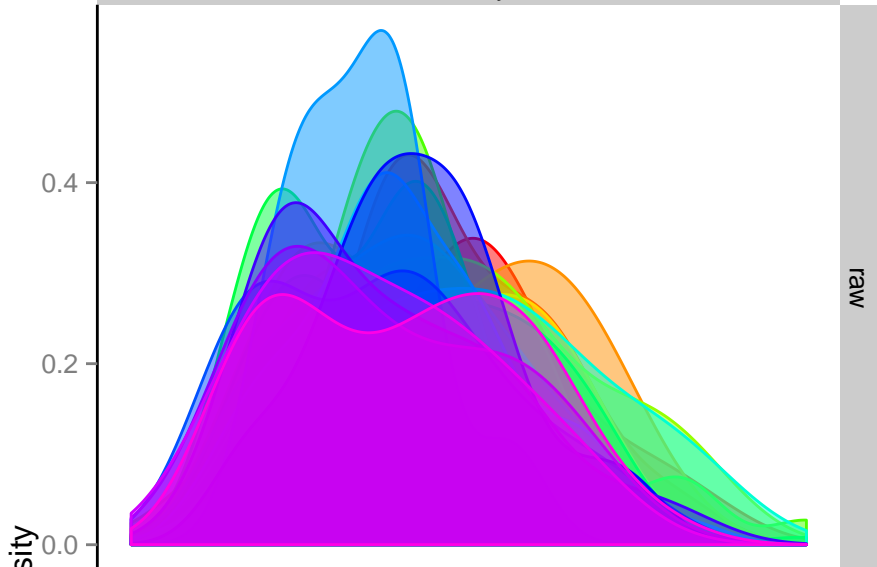

raw

## PLATFORMRUNDAY\_miss

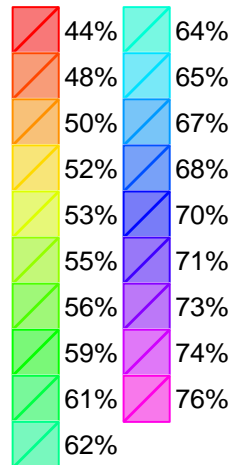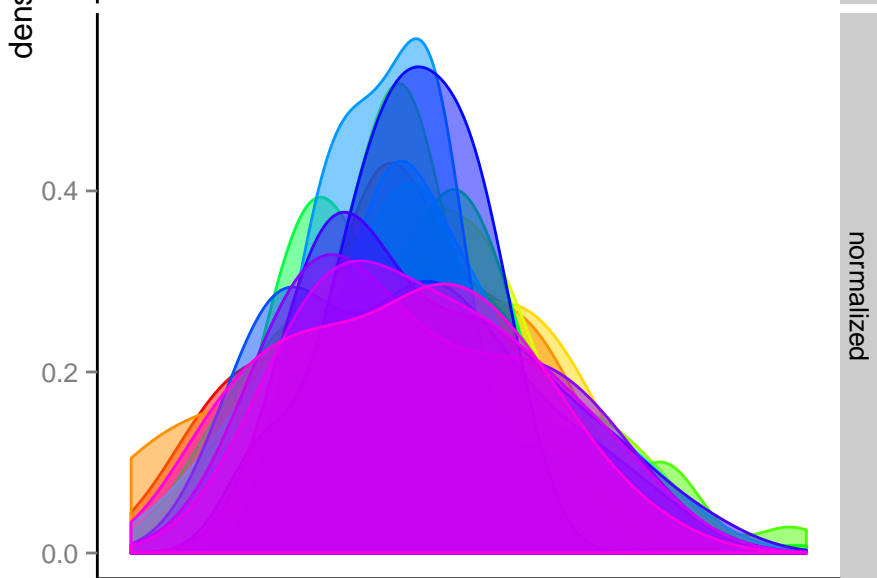

normalized

log(ion counts)

# X-13658

runday

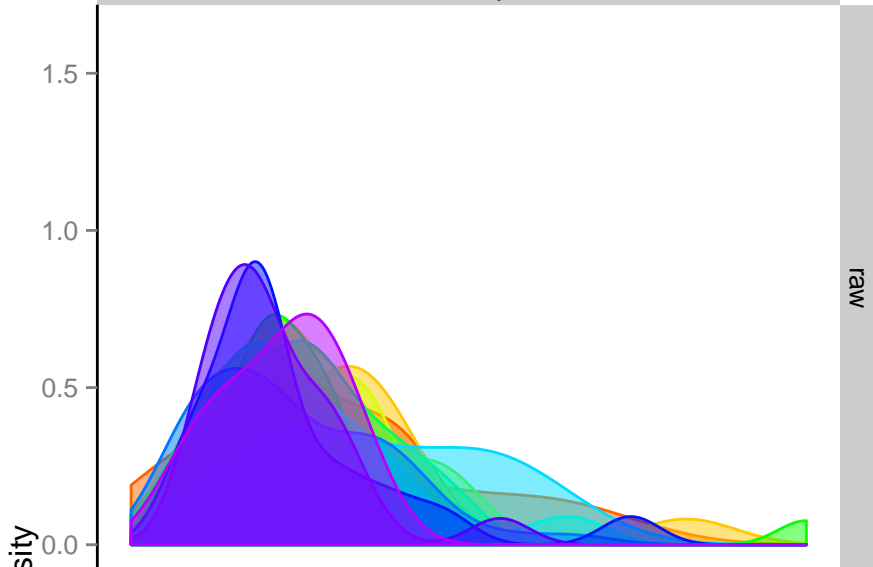

raw

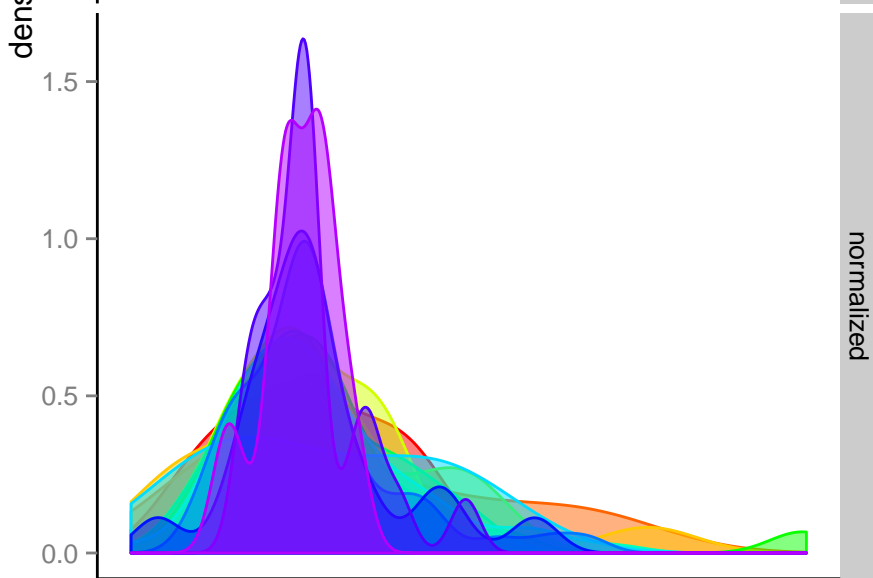

normalized

## PLATFORMRUNDAY\_miss

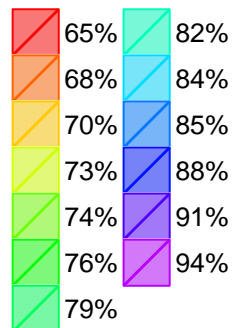

log(ion counts)

# X-13671

runday

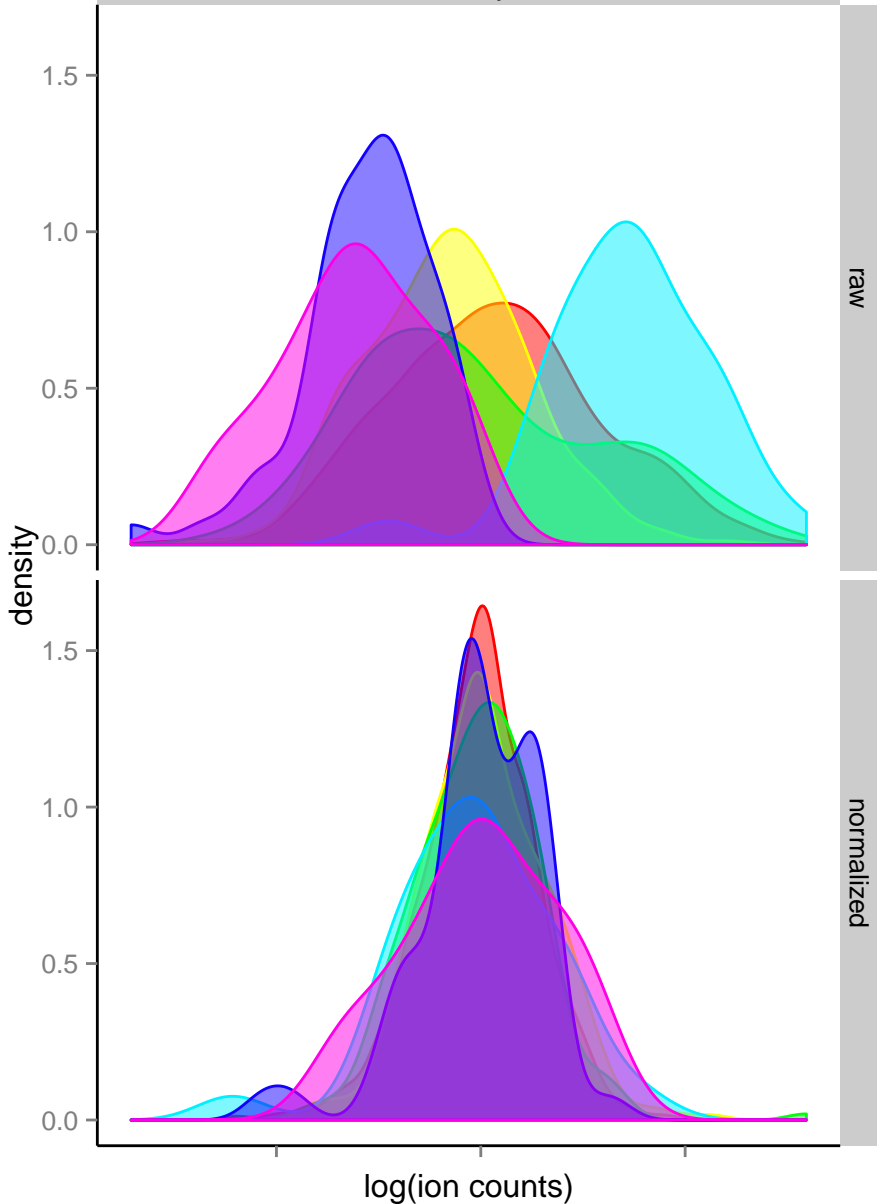

**PLATFORMRUNDAY\_miss**

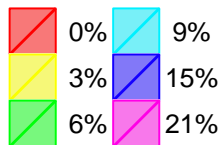



# X-13699

runday

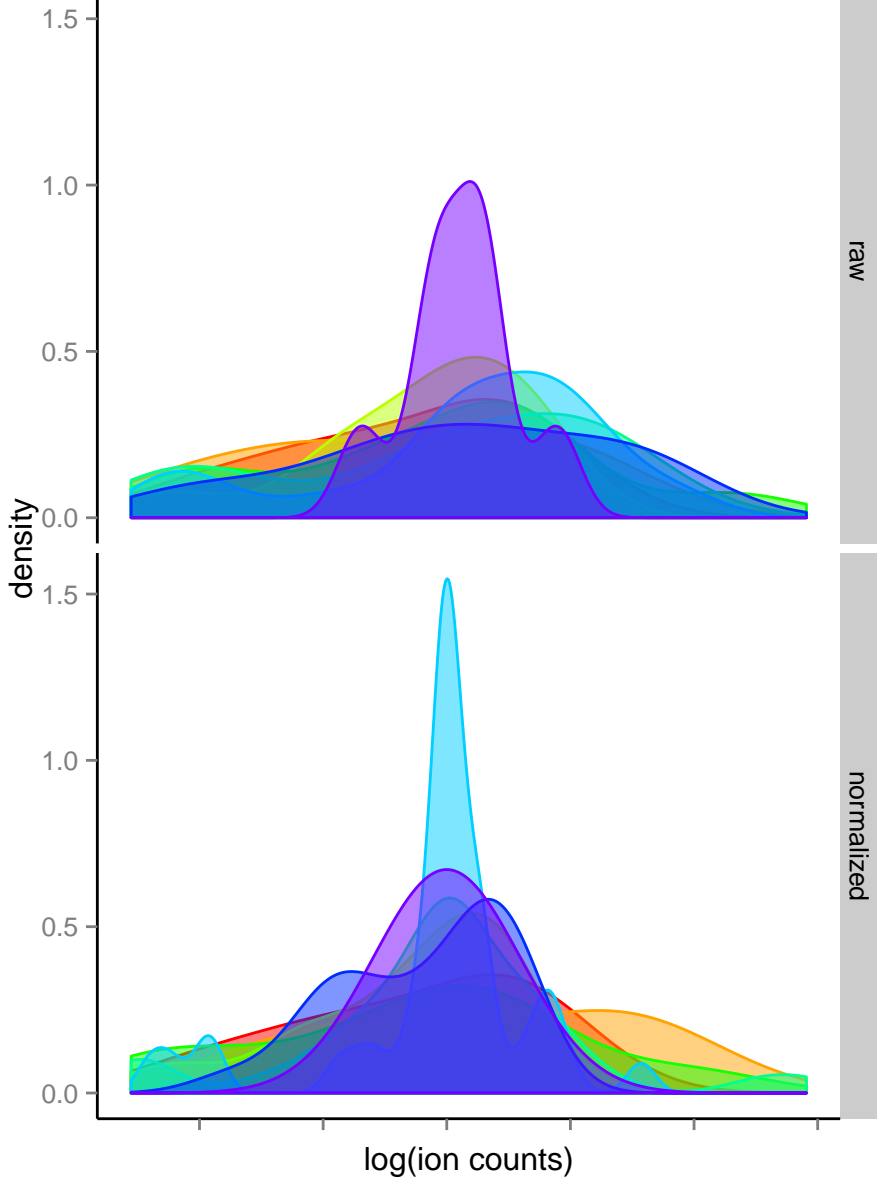

## PLATFORMRUNDAY\_miss

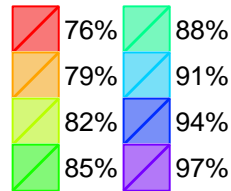

# X-13741

runday

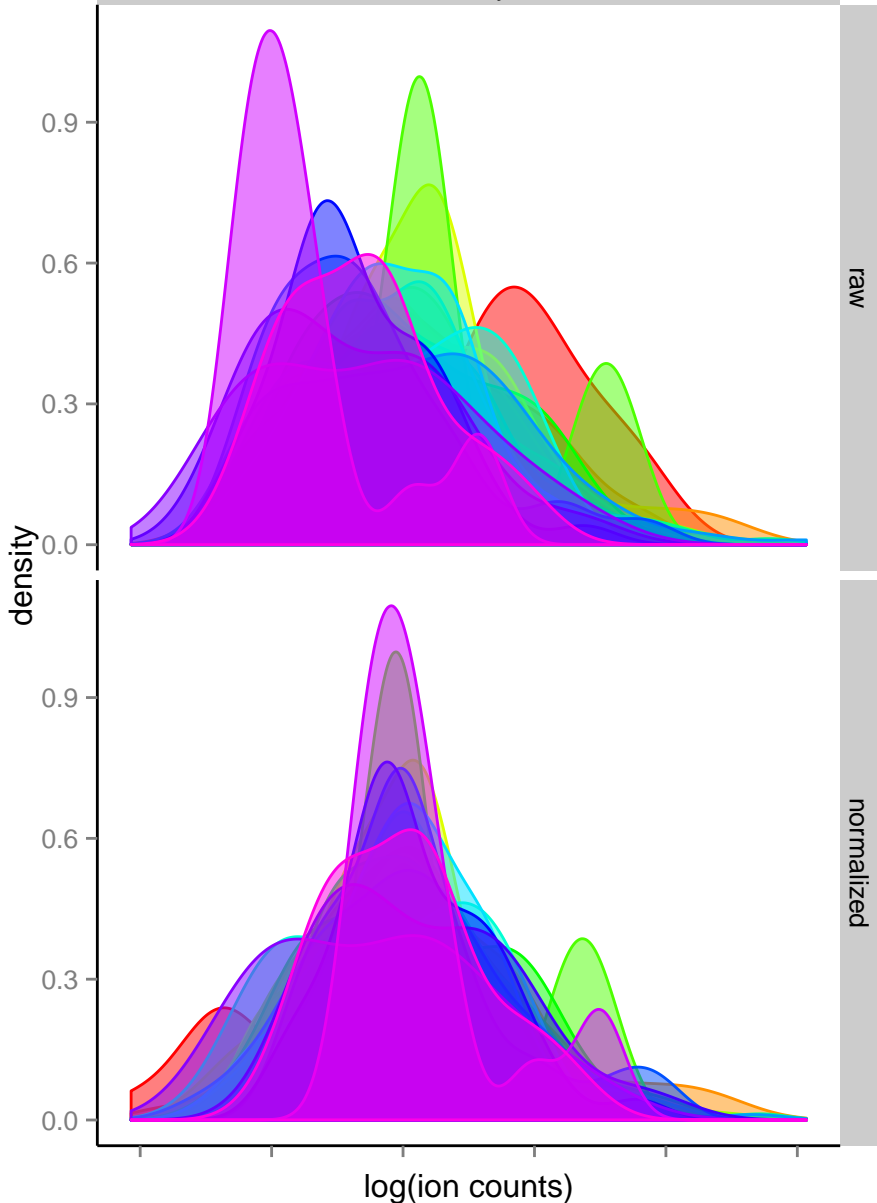

## PLATFORMRUNDAY\_miss

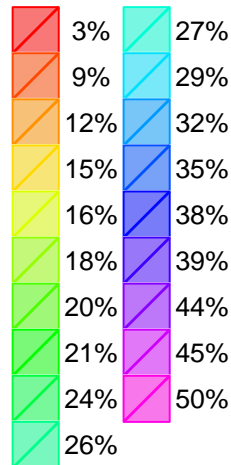

# X-13859

runday

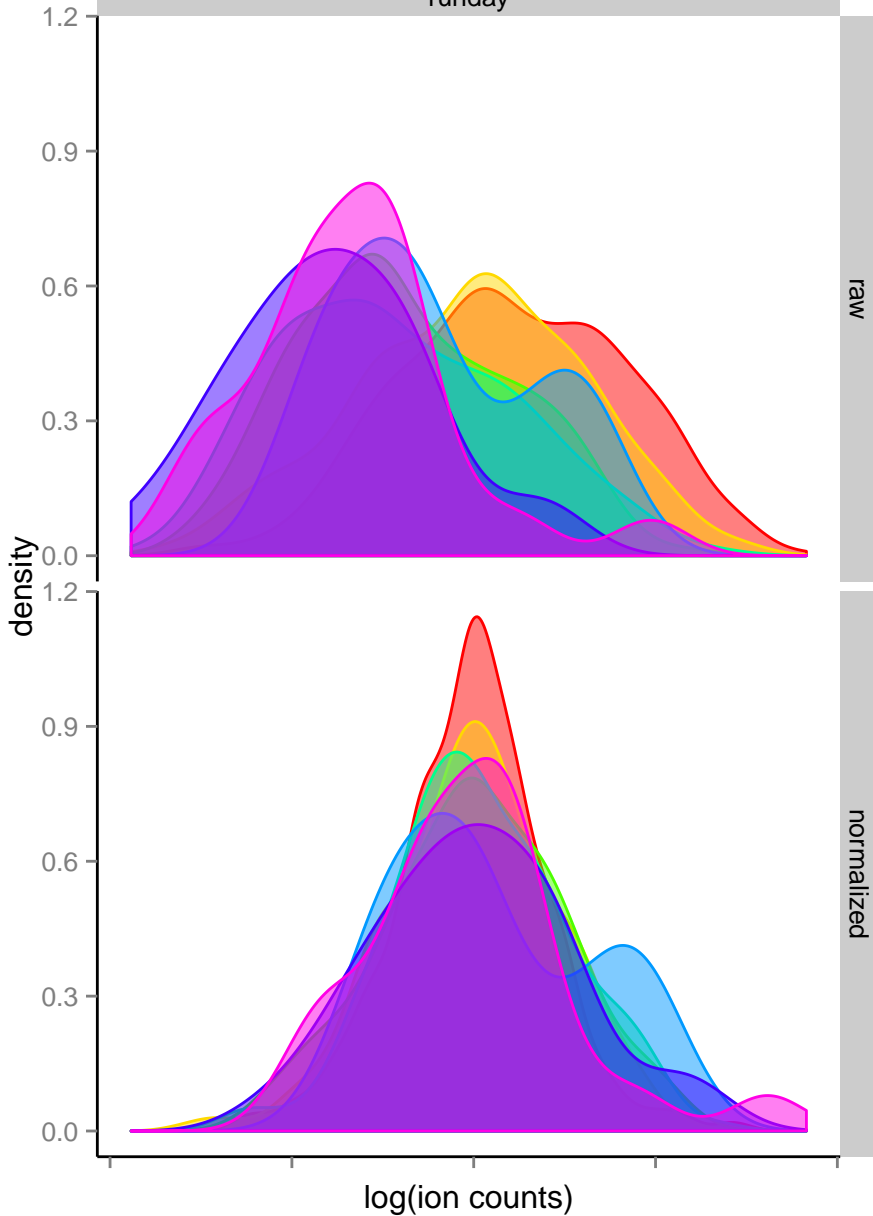

## PLATFORMRUNDAY\_miss

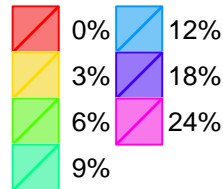

X-14056

runday

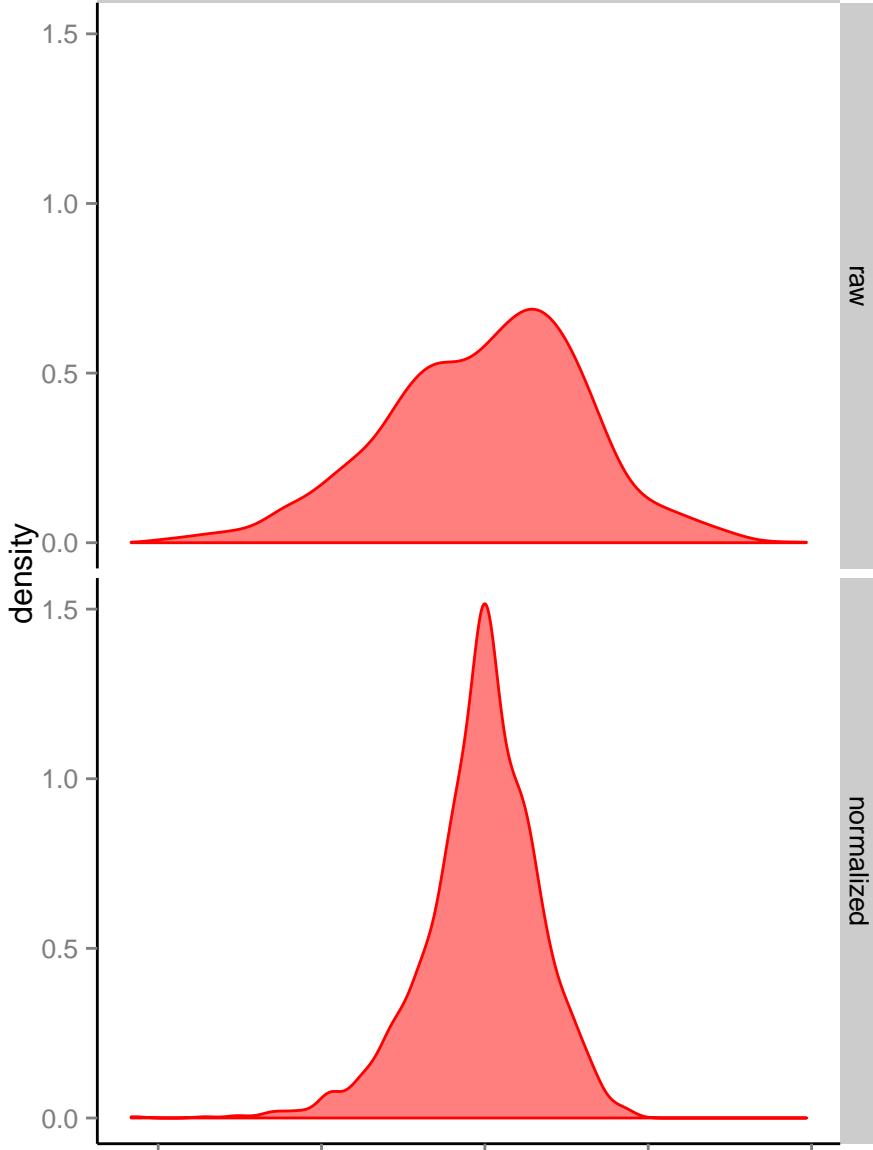

raw

normalized

PLATFORMRUNDAY\_miss

0%

# X-14057

runday

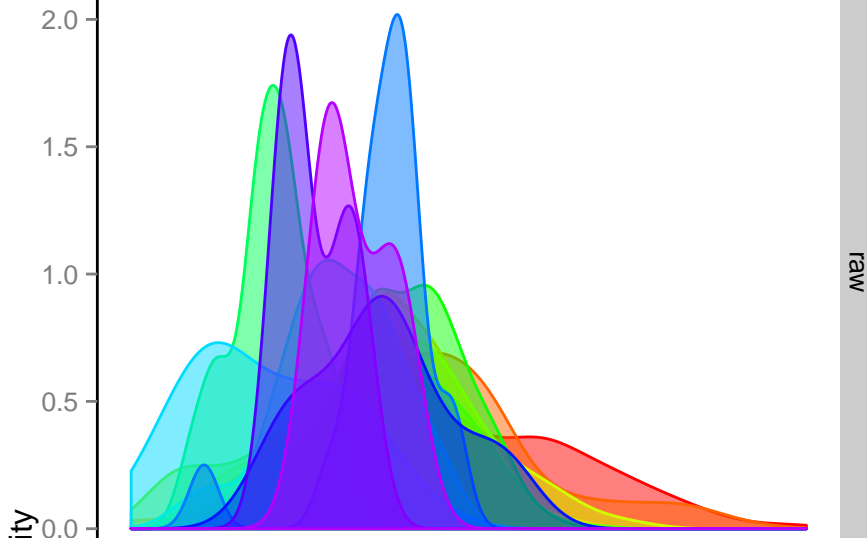

raw

## PLATFORMRUNDAY\_miss

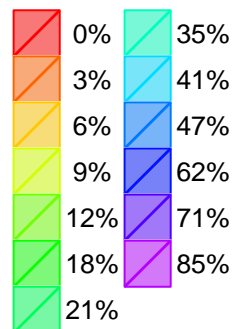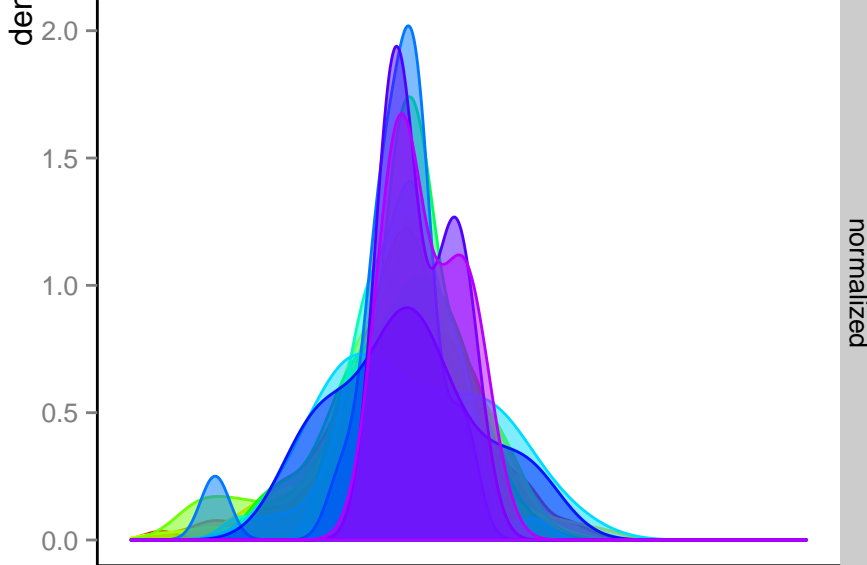

normalized

log(ion counts)

# X-14086

runday

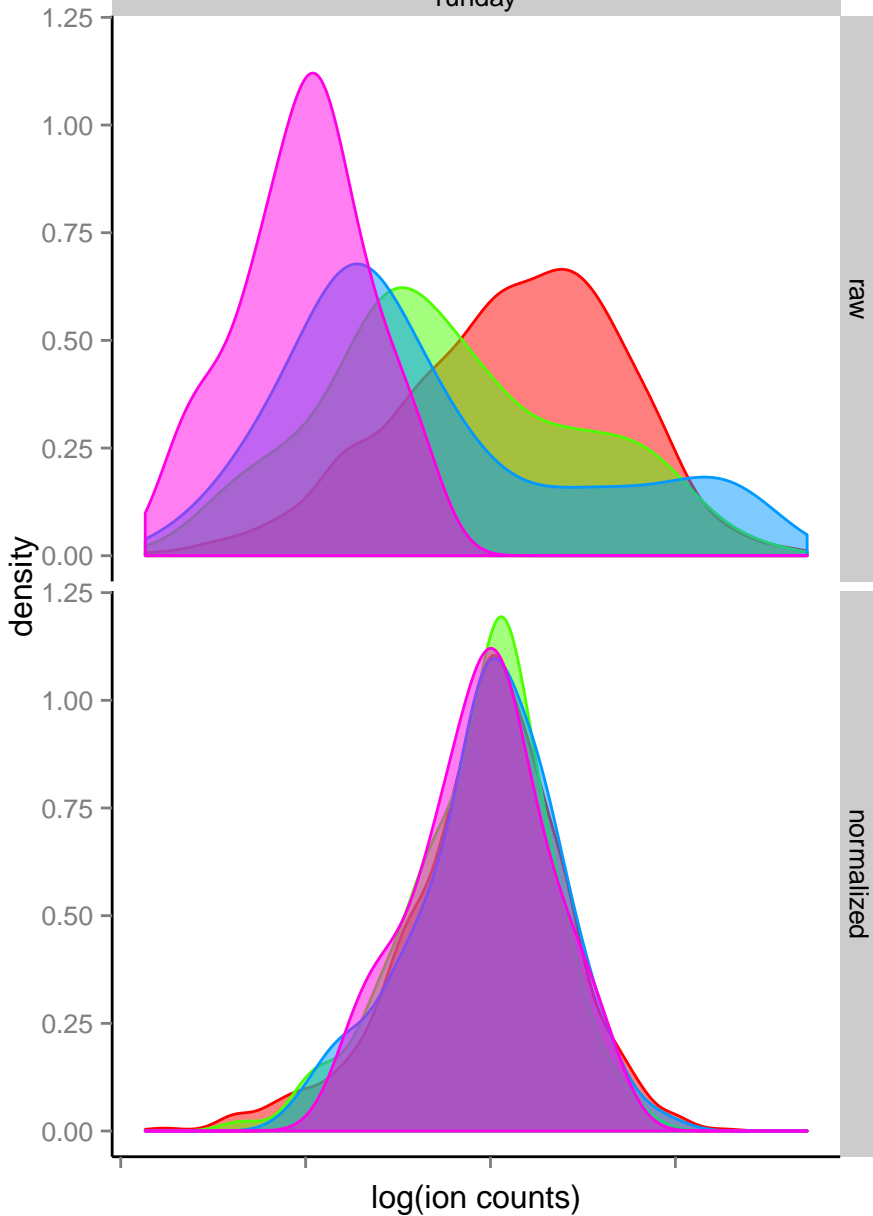

**PLATFORMRUNDAY\_miss**

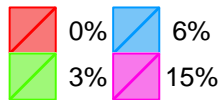

# leucylalanine

runday

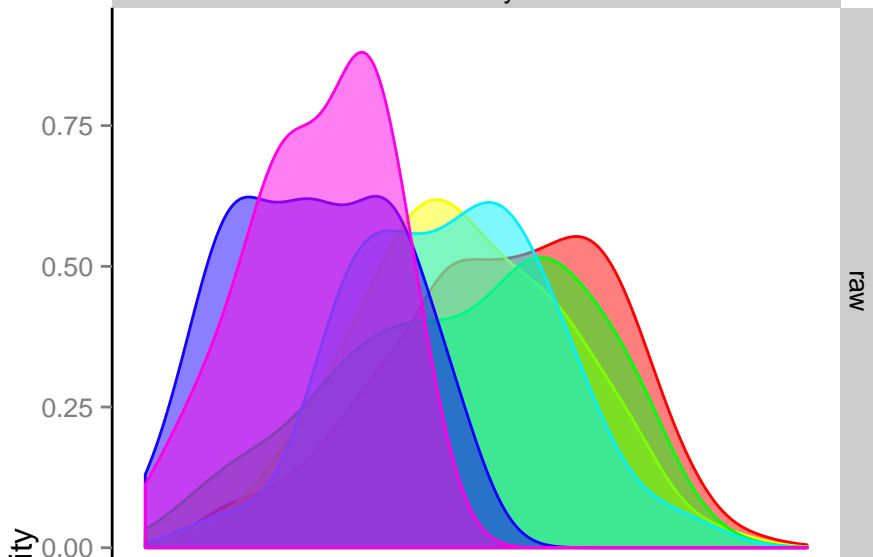

raw

## PLATFORMRUNDAY\_miss

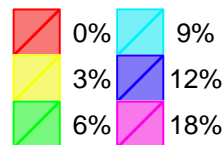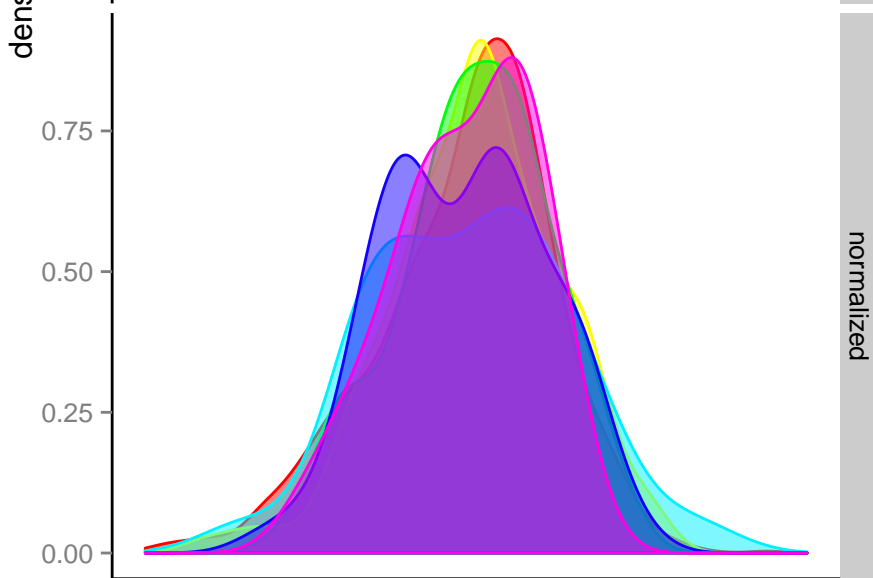

normalized

log(ion counts)

# alpha-glutamyltyrosine

runday

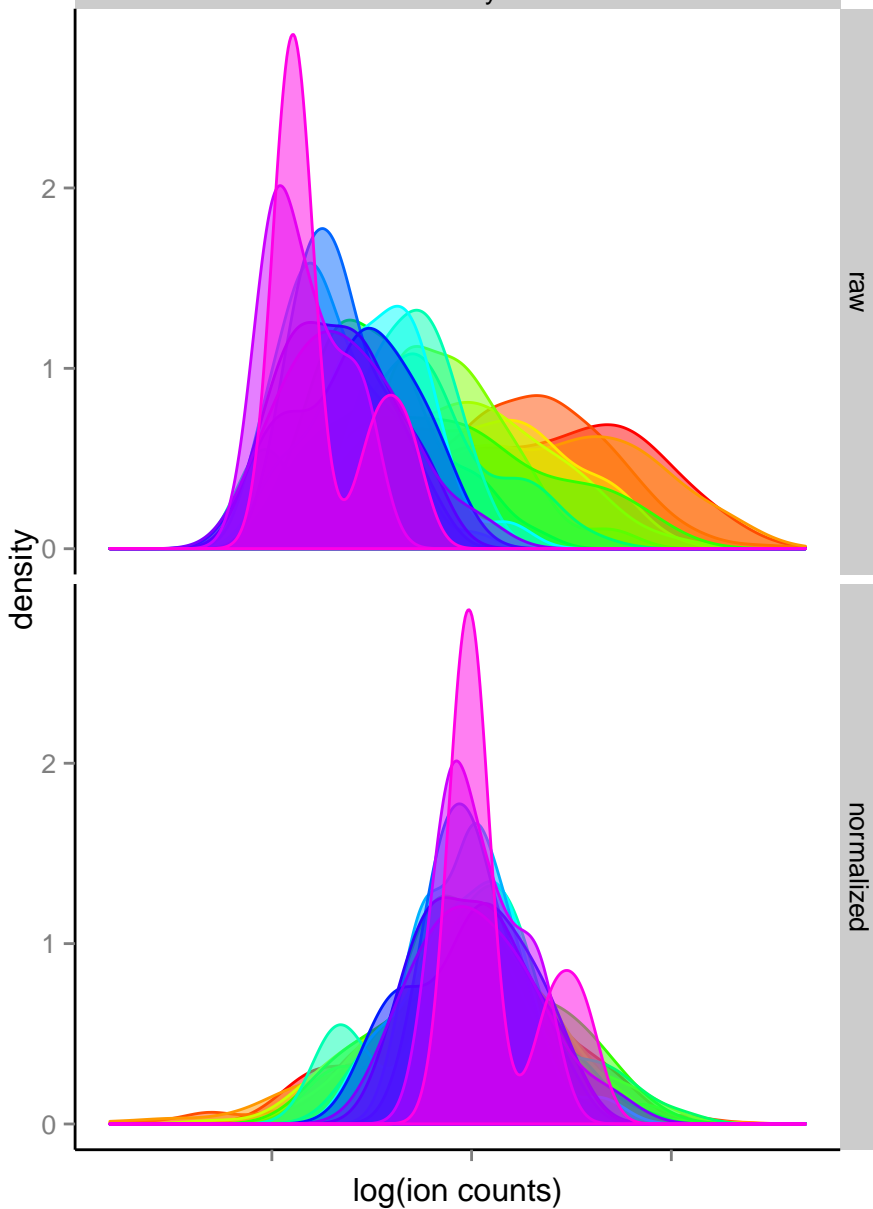

raw

normalized

## PLATFORMRUNDAY\_miss

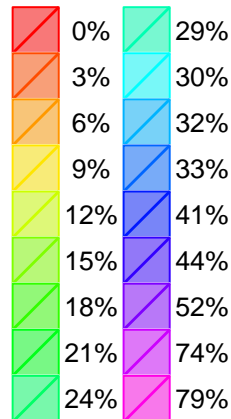



# phenylalanylserine

runday

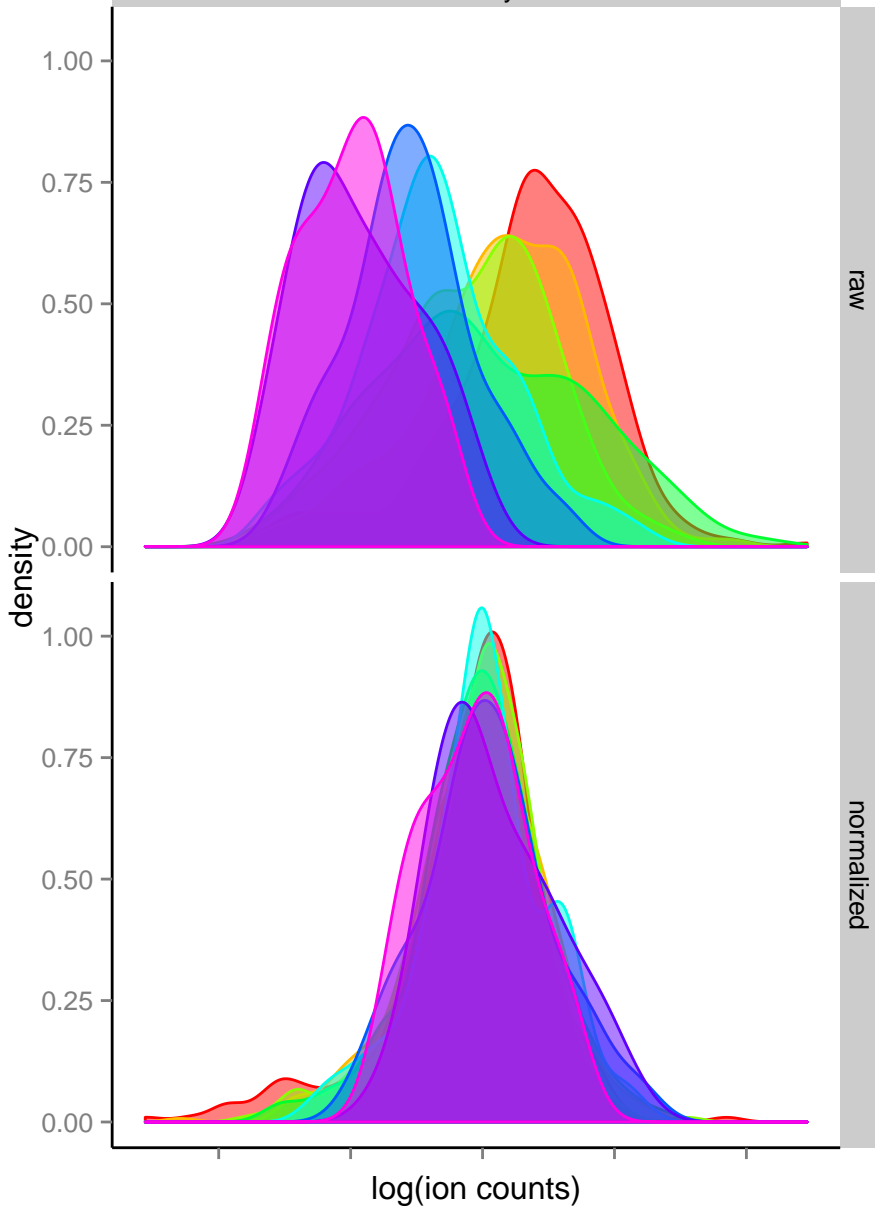

raw

normalized

**PLATFORMRUNDAY\_miss**

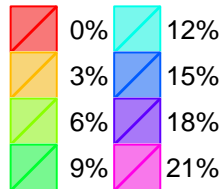

log(ion counts)

# leucylalanine

runday

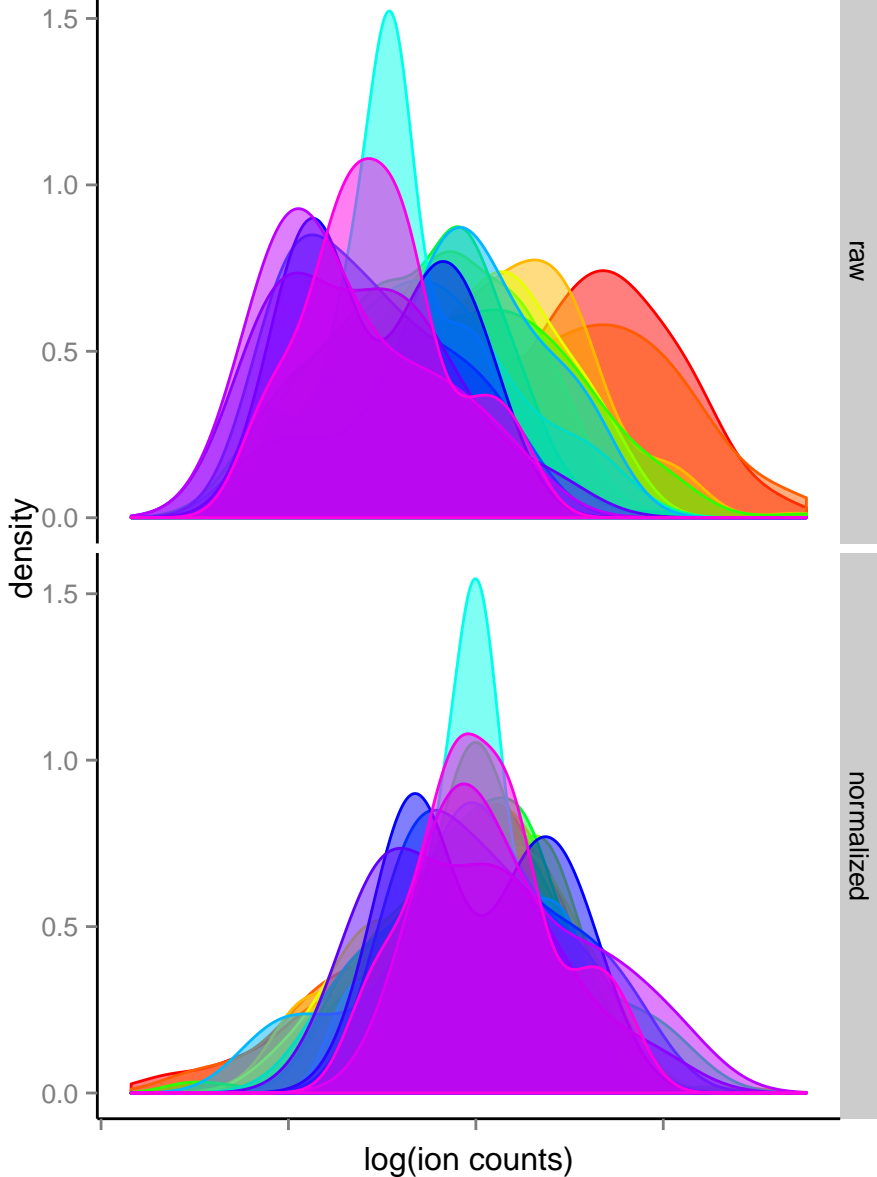

## PLATFORMRUNDAY\_miss

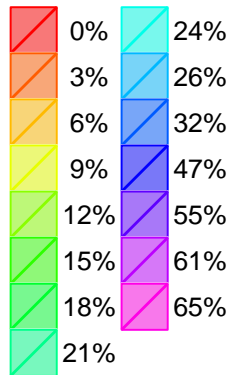

# X-14374

runday

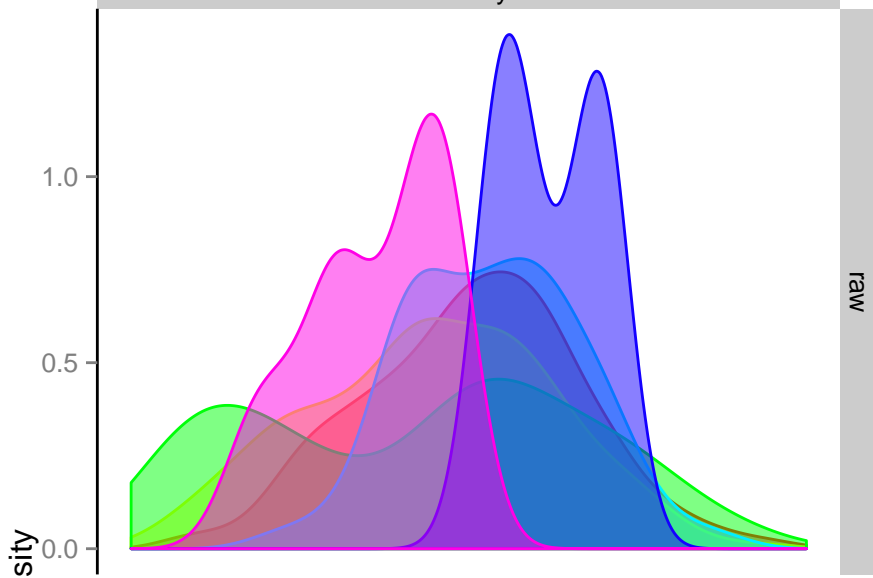

raw

## PLATFORMRUNDAY\_miss

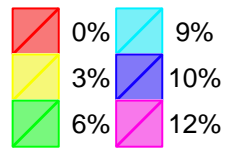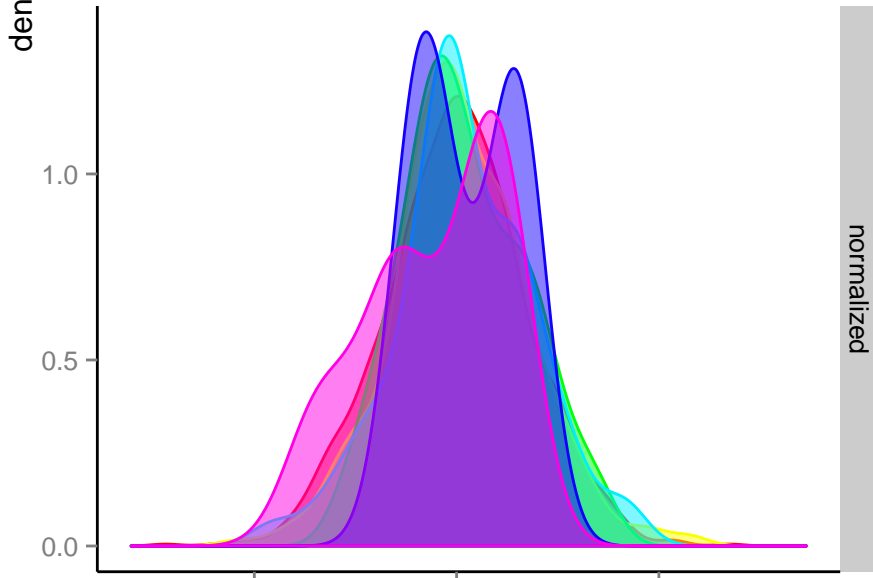

normalized

log(ion counts)

# phenylalanylleucine

runday

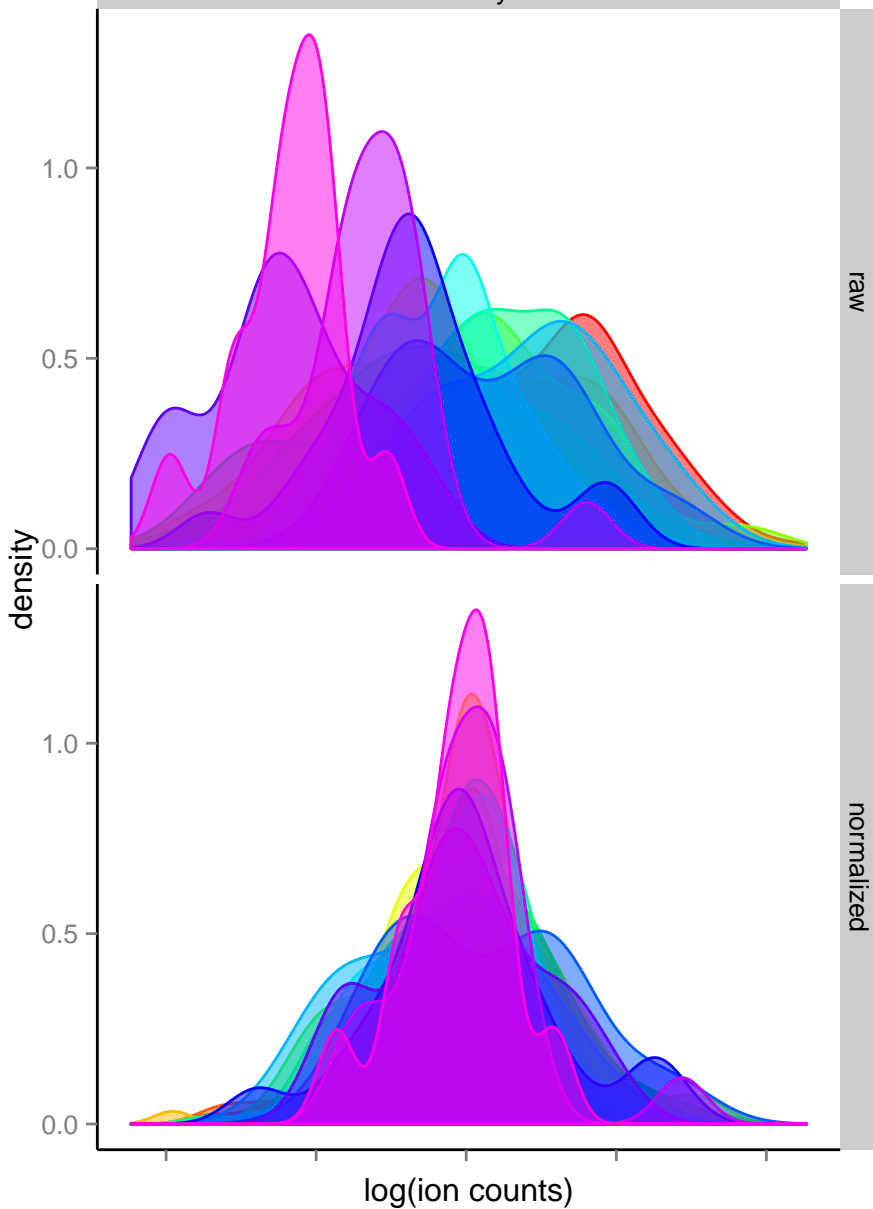

## PLATFORMRUNDAY\_miss

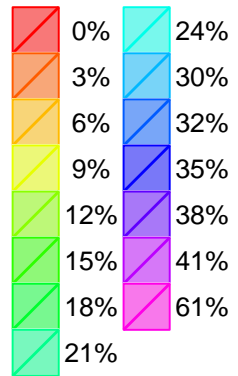

# X-14473

runday

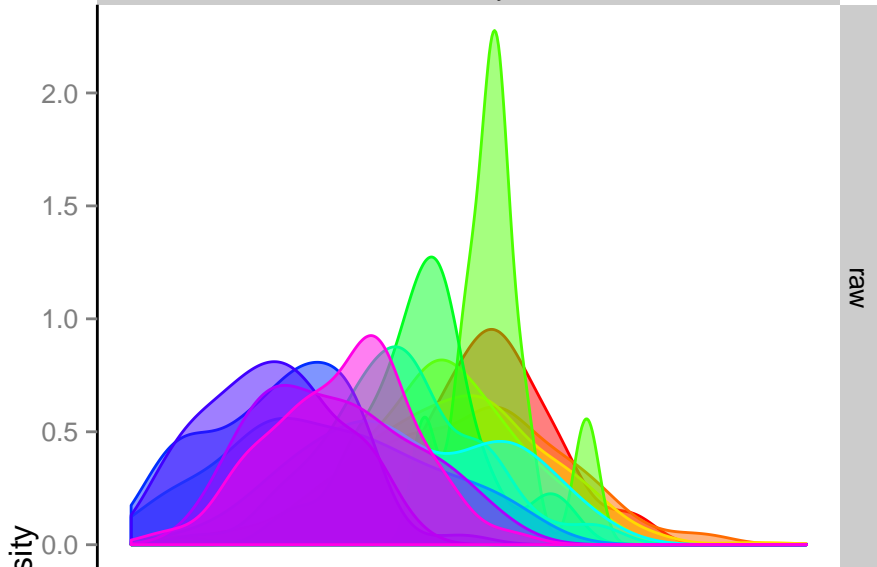

raw

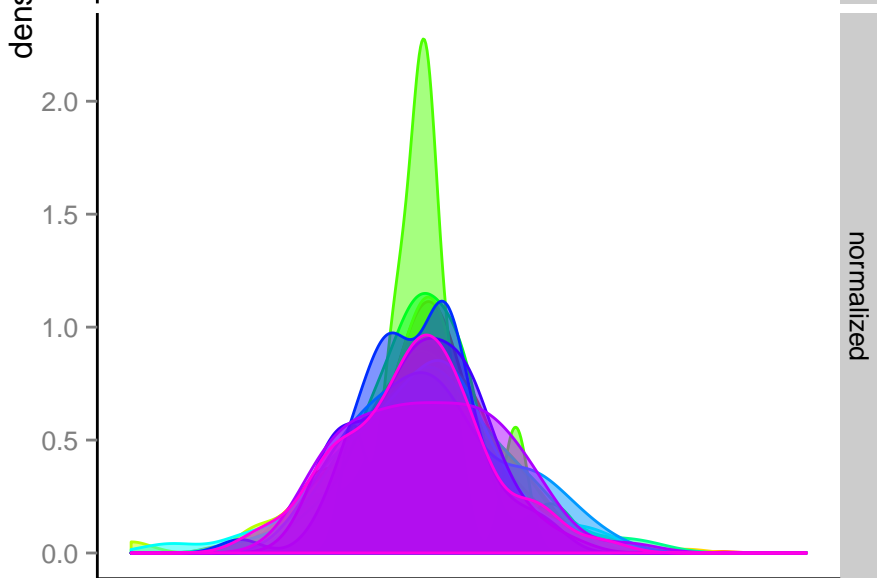

normalized

## PLATFORMRUNDAY\_miss

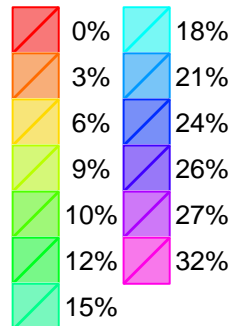

log(ion counts)

# phenylalanylphenylalanine

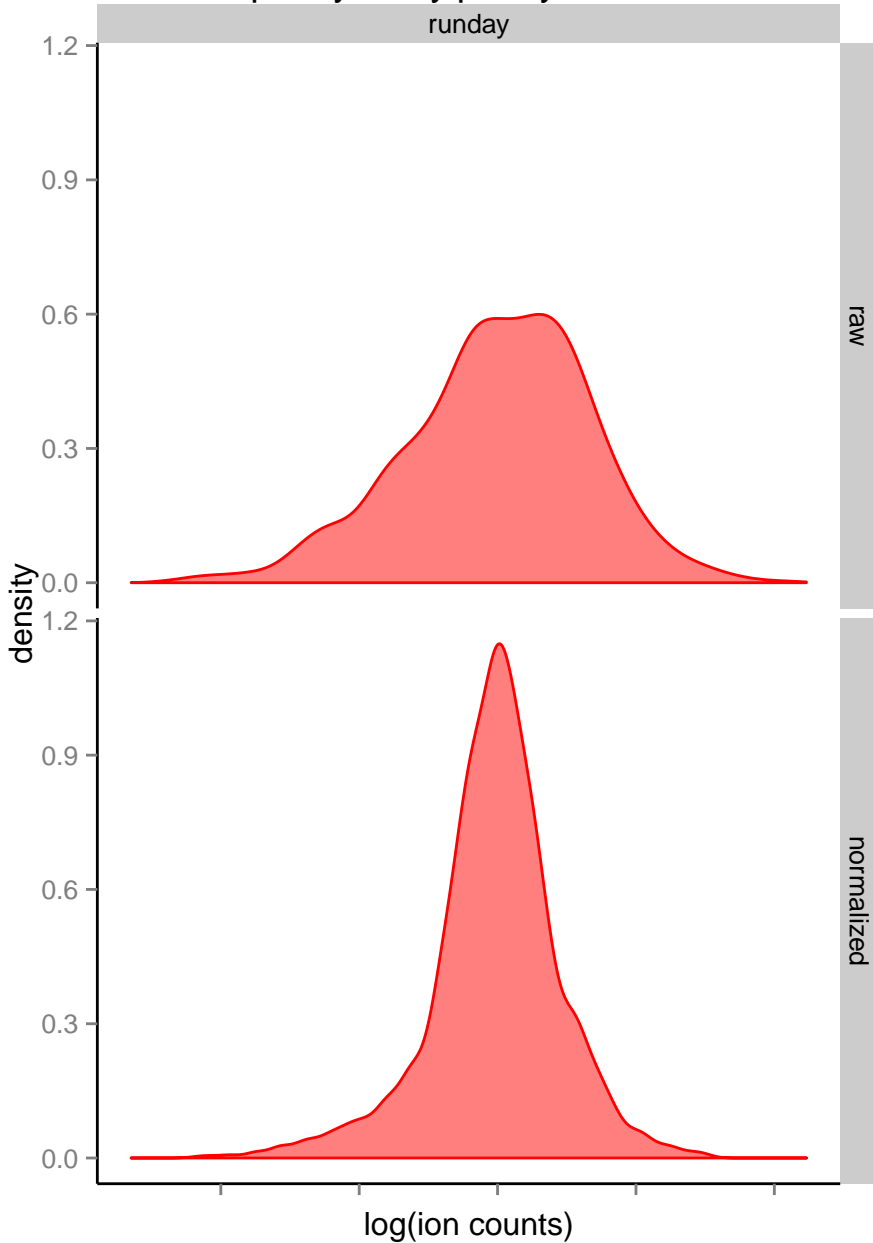

**PLATFORMRUNDAY\_miss**

0%

# cyclo(leucylproline)

runday

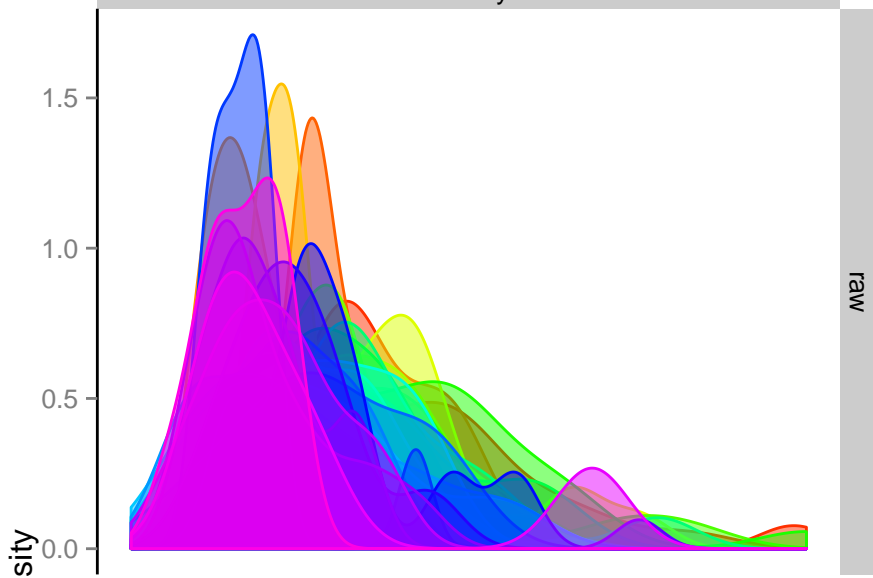

raw

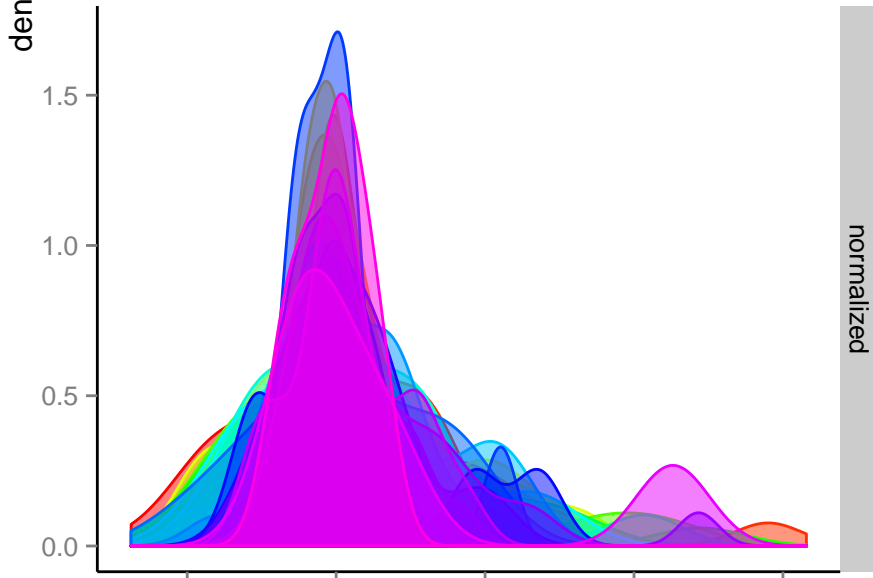

normalized

## PLATFORMRUNDAY\_miss

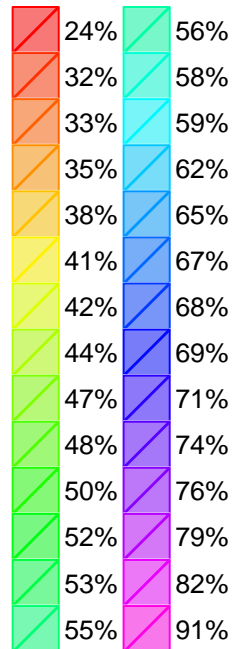

log(ion counts)

# X-14541

runday

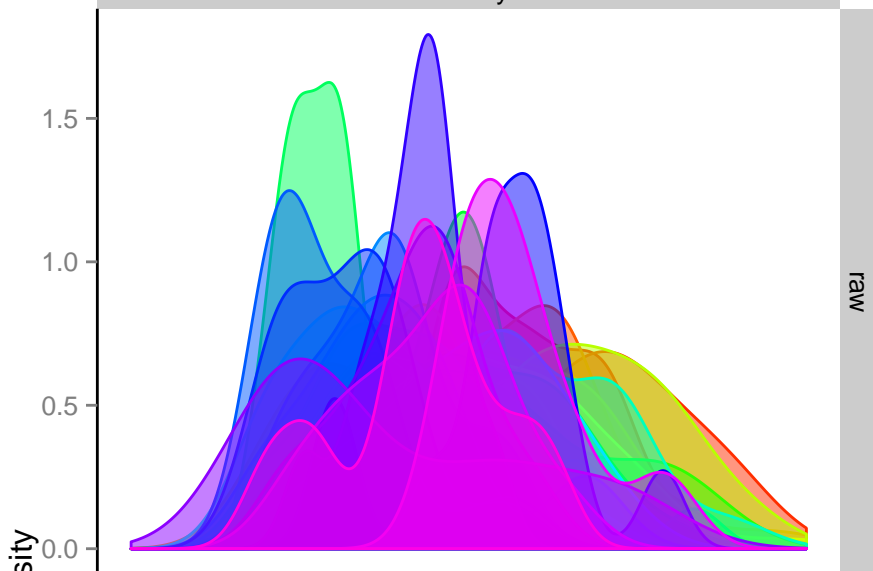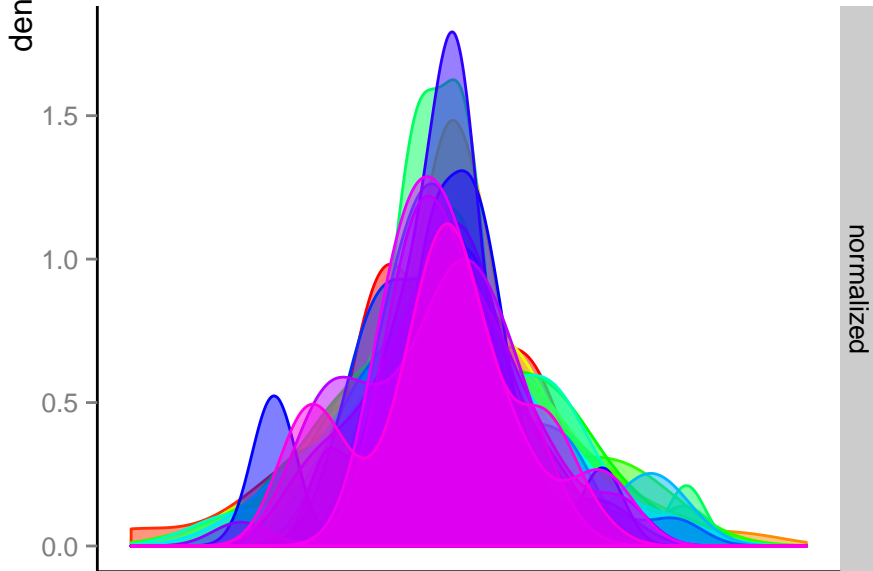

log(ion counts)

## PLATFORMRUNDAY\_miss

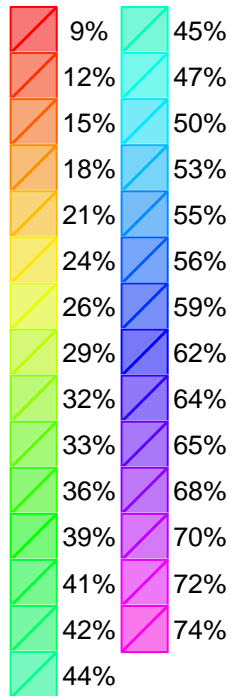



X-14588

runday

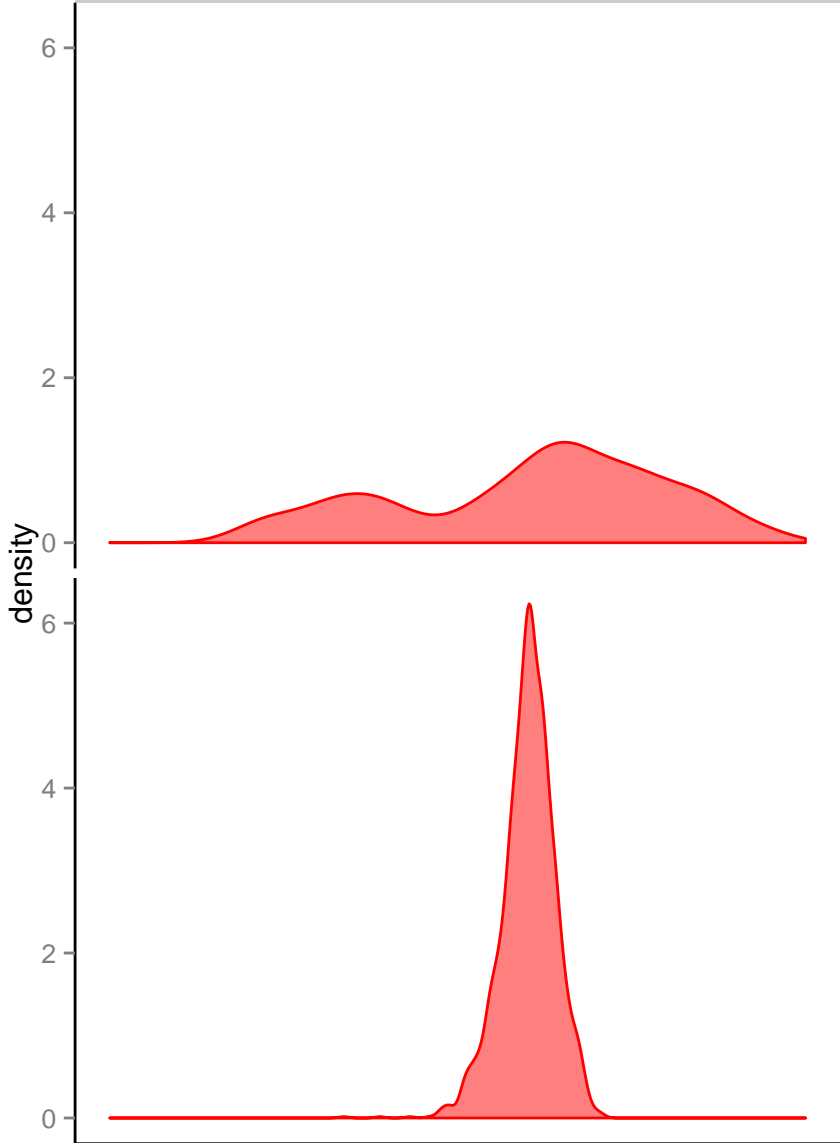

raw

normalized

PLATFORMRUNDAY\_miss



0%

log(ion counts)

density

# X-14625

runday

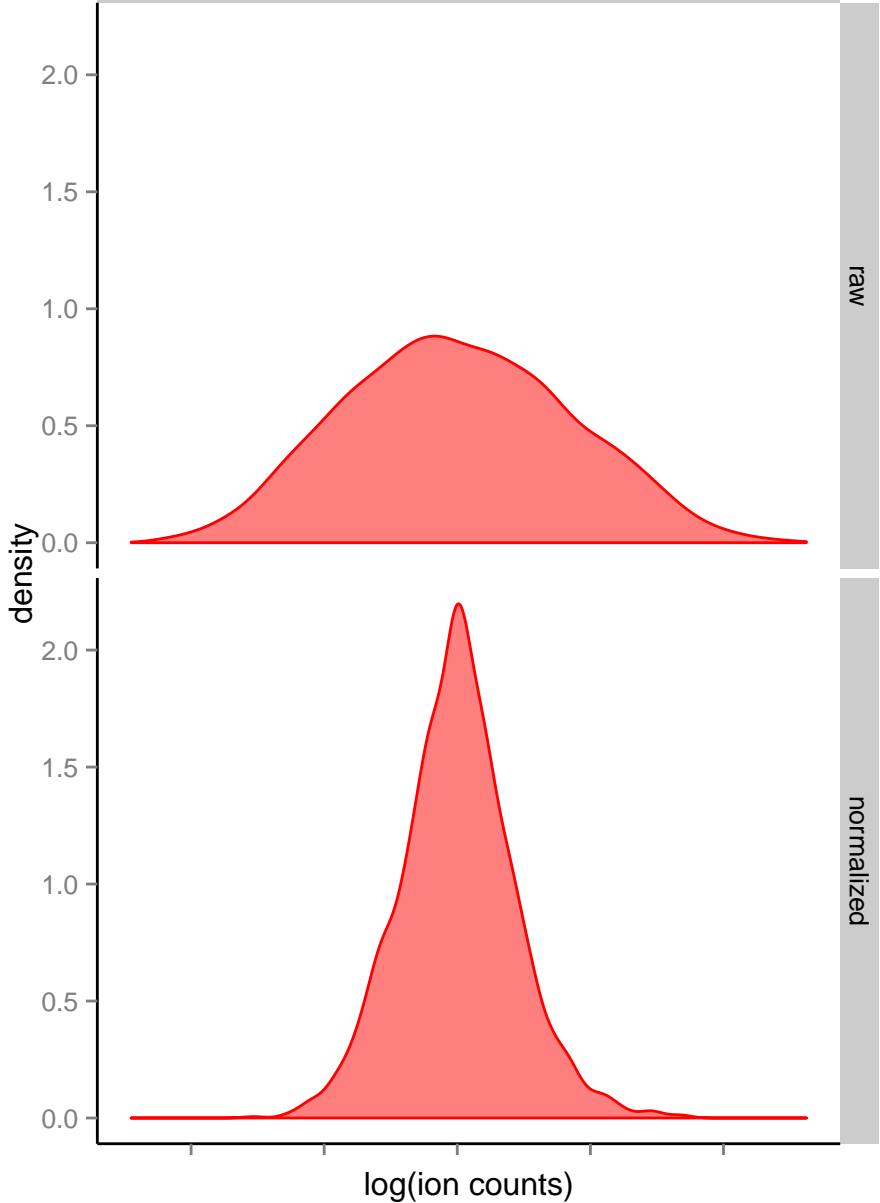

raw

normalized

**PLATFORMRUNDAY\_miss**

0%

# X-14626

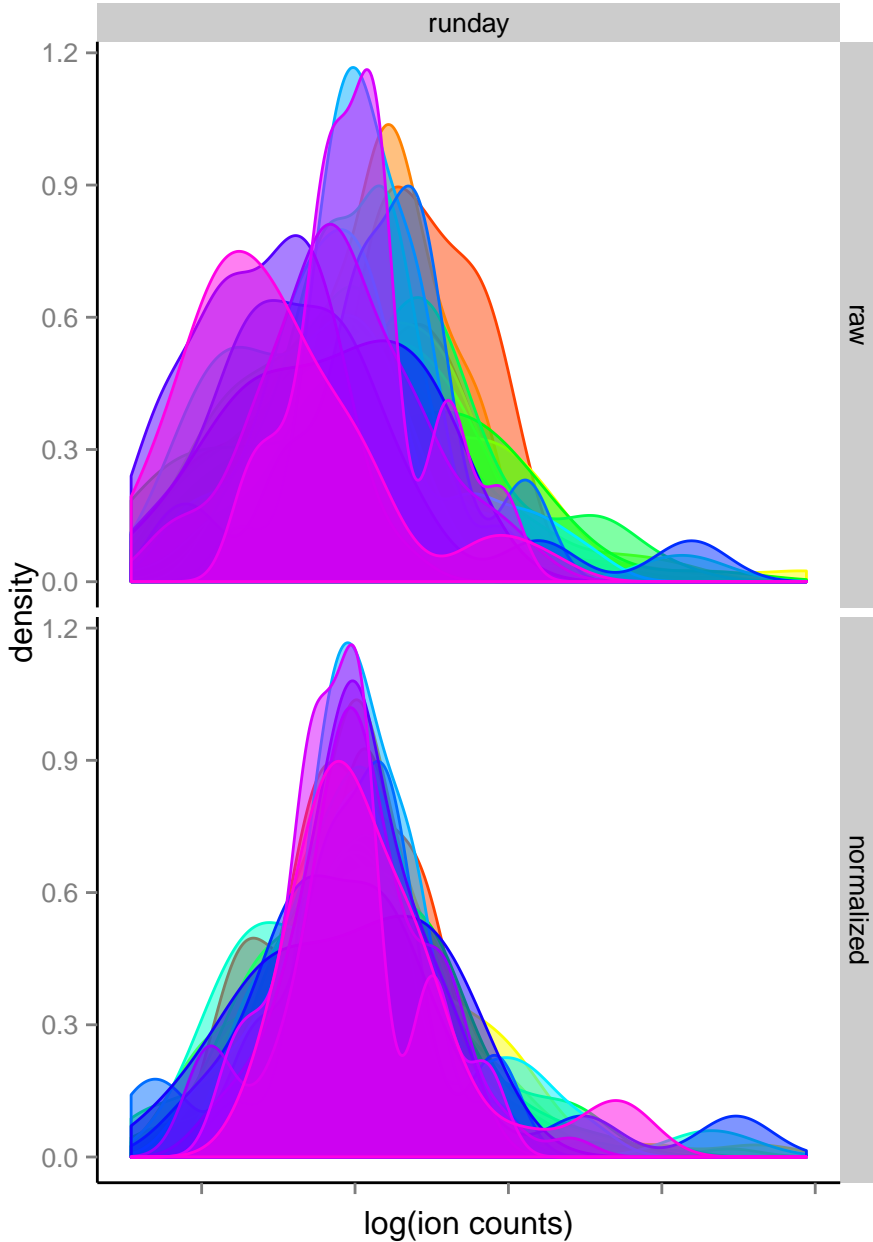

## PLATFORMRUNDAY\_miss

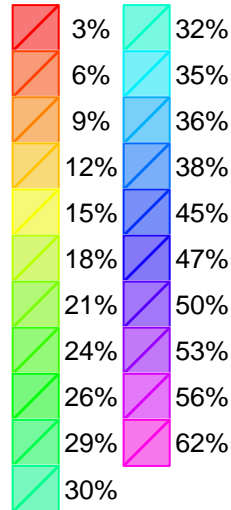

# X-14632

runday

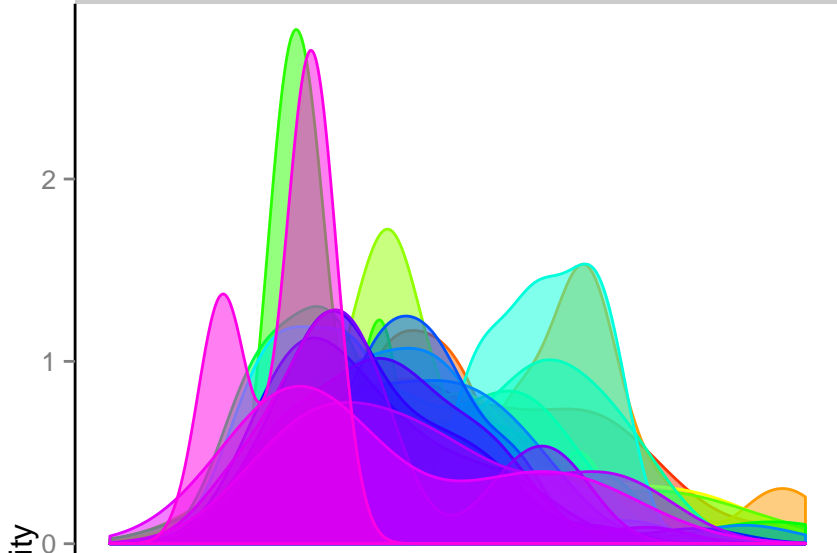

raw

## PLATFORMRUNDAY\_miss

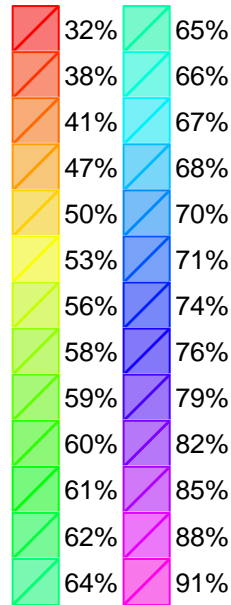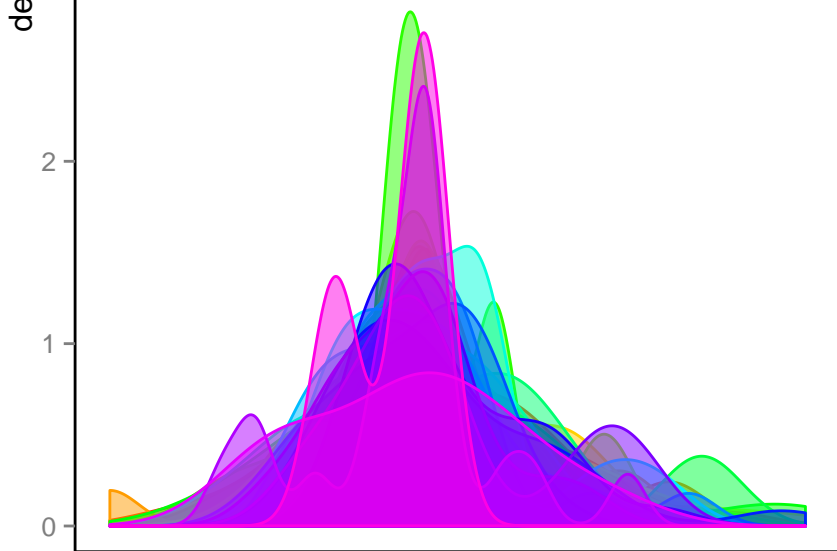

normalized

log(ion counts)

# X-14658

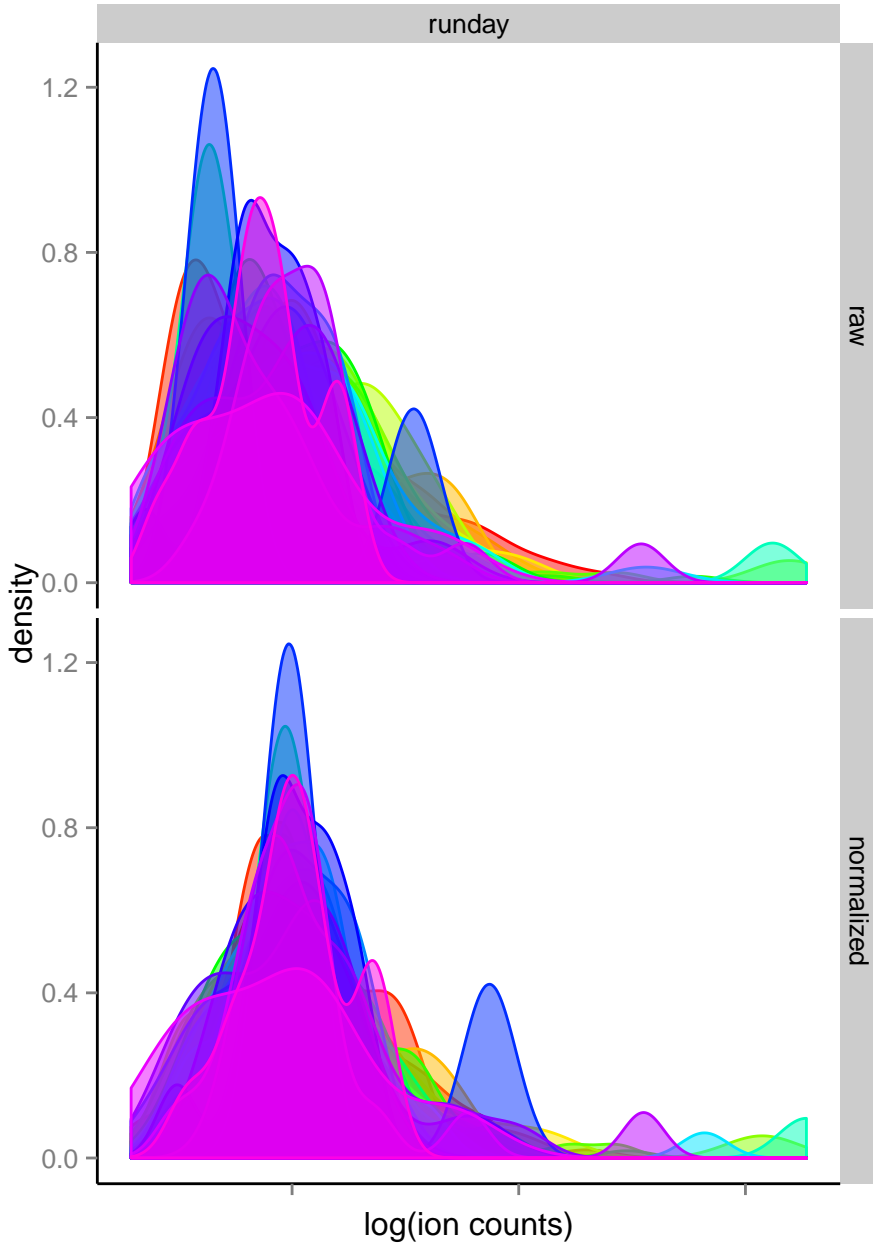

## PLATFORMRUNDAY\_miss

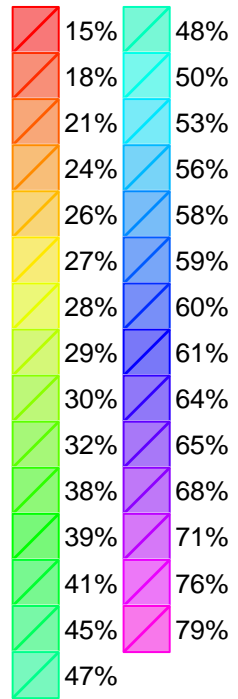

# X-14662

runday

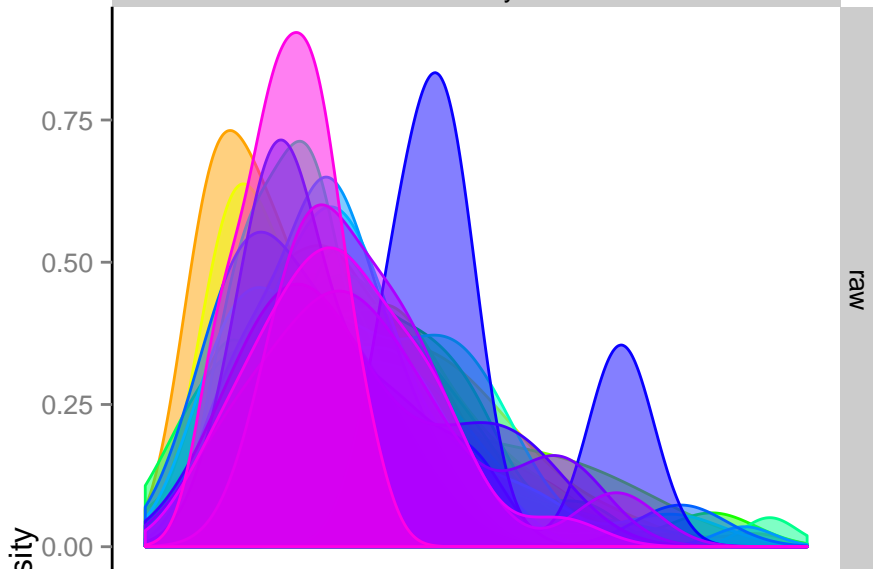

raw

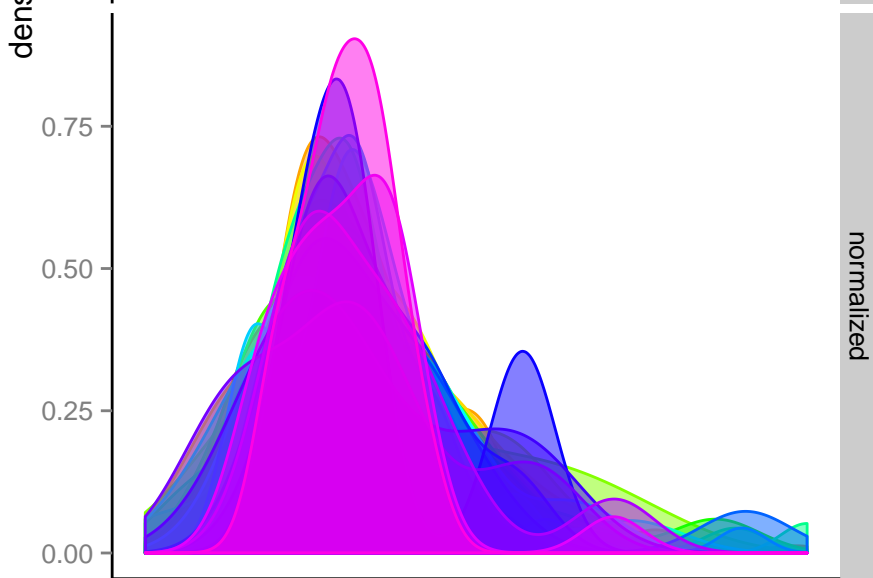

normalized

**PLATFORMRUNDAY\_miss**

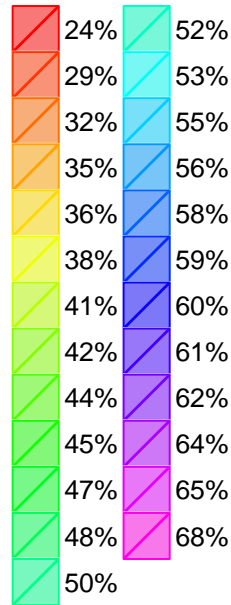

log(ion counts)

# X-14663

runday

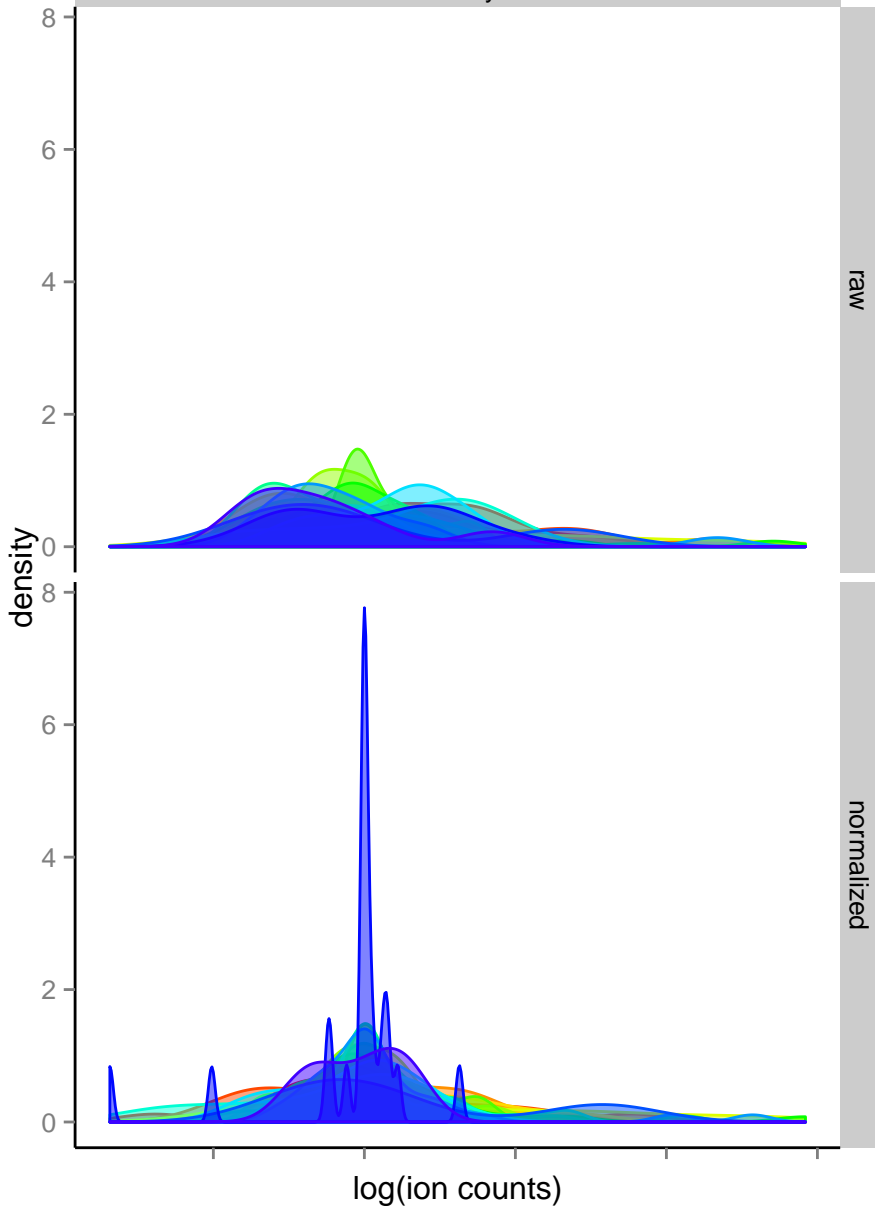

## PLATFORMRUNDAY\_miss

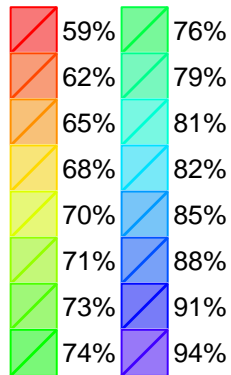

# X-14745

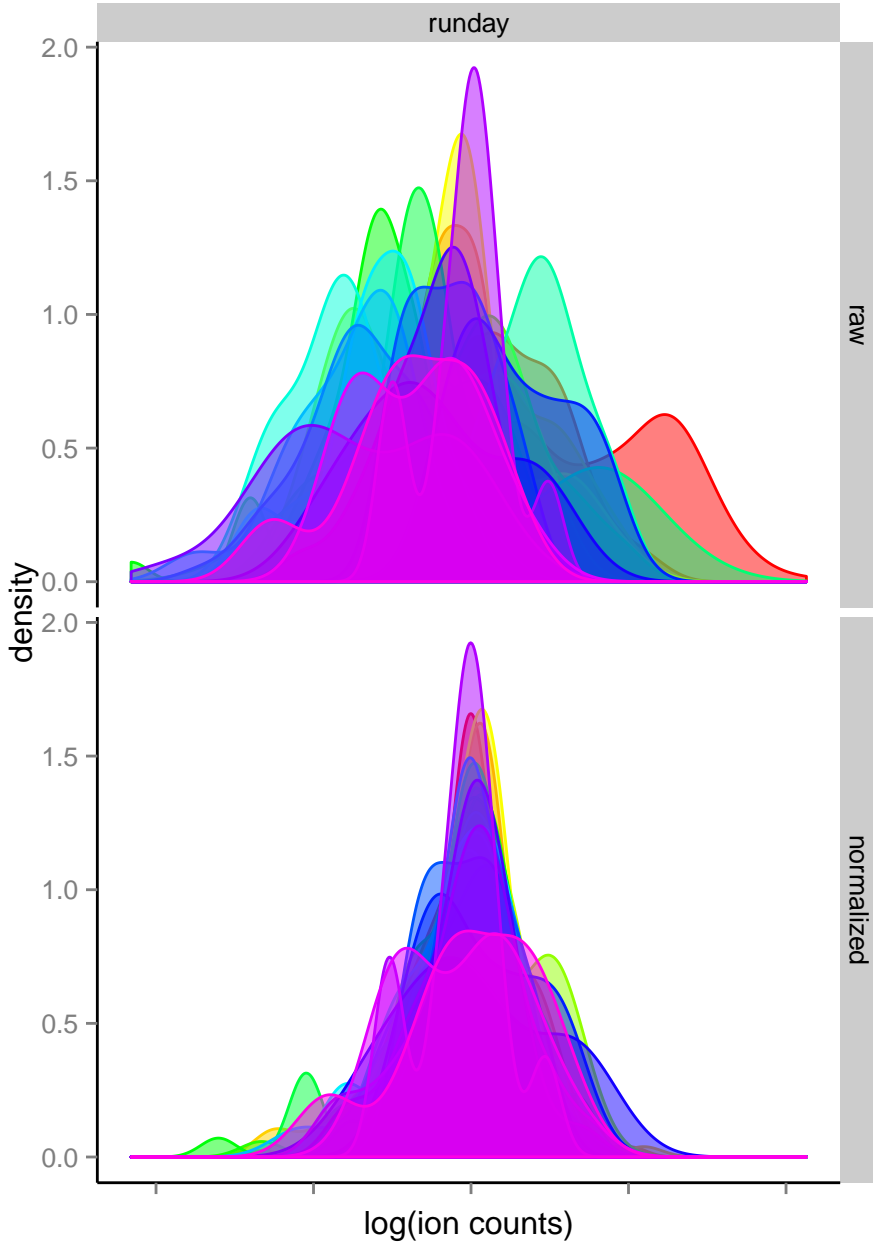

## PLATFORMRUNDAY\_miss

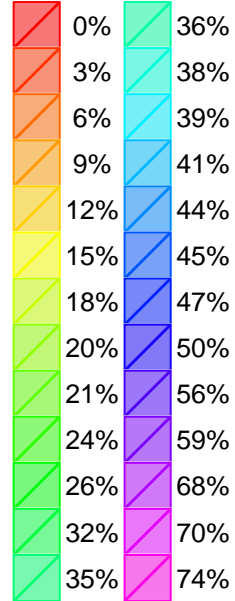



# vanillin

runday

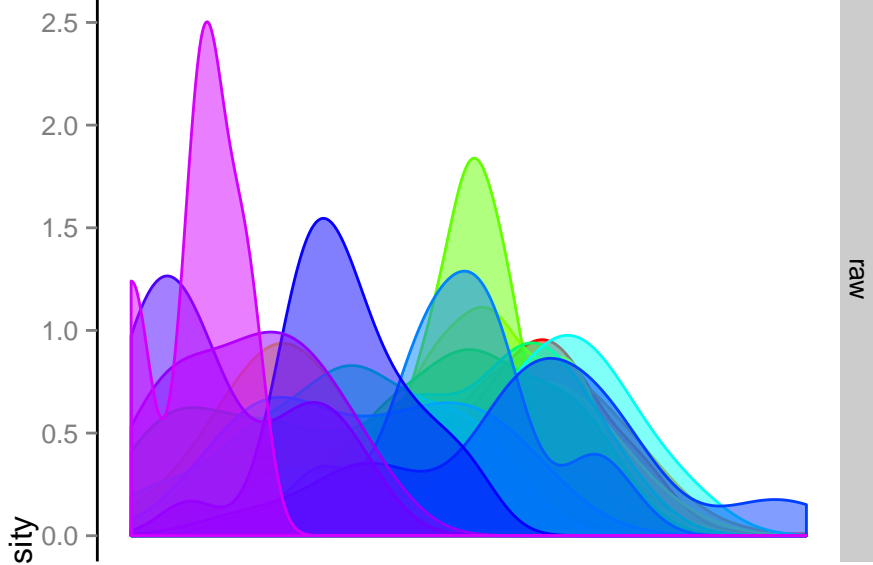

raw

## PLATFORMRUNDAY\_miss

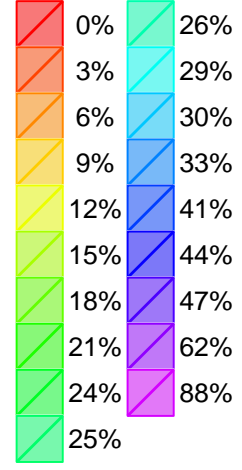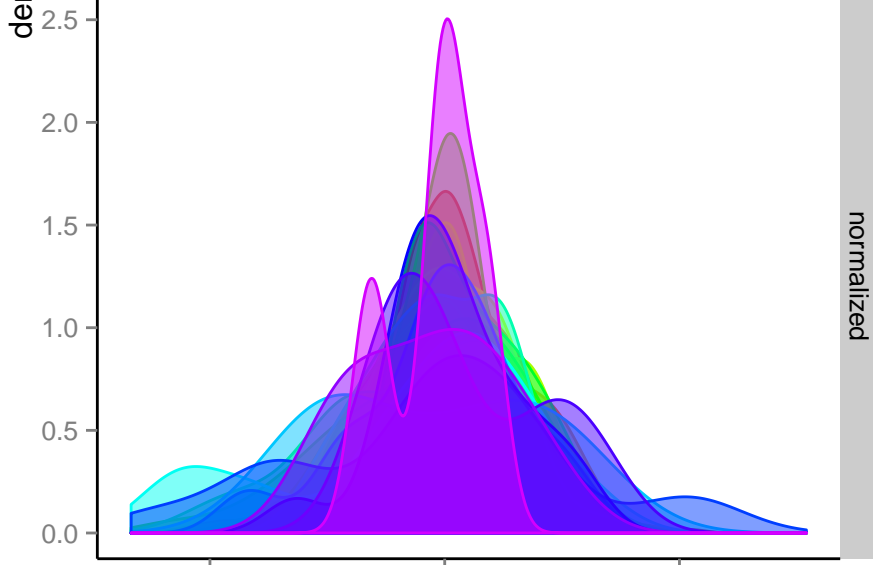

normalized

log(ion counts)
